# Supplementary material for: A multiproxy database of western North American Holocene paleoclimate records
Source: Copernicus journal article supplement (doi:10.5194/essd-2020-215), 2020-09-30
Supplement: Supplementary file 1 [file essd-2020-215-supplement.zip]

Proxy data and metadata  
GlacierIce | d18O | Logan.Fisher.2008 | GHbf6a9c96

Proxy time series: d18O

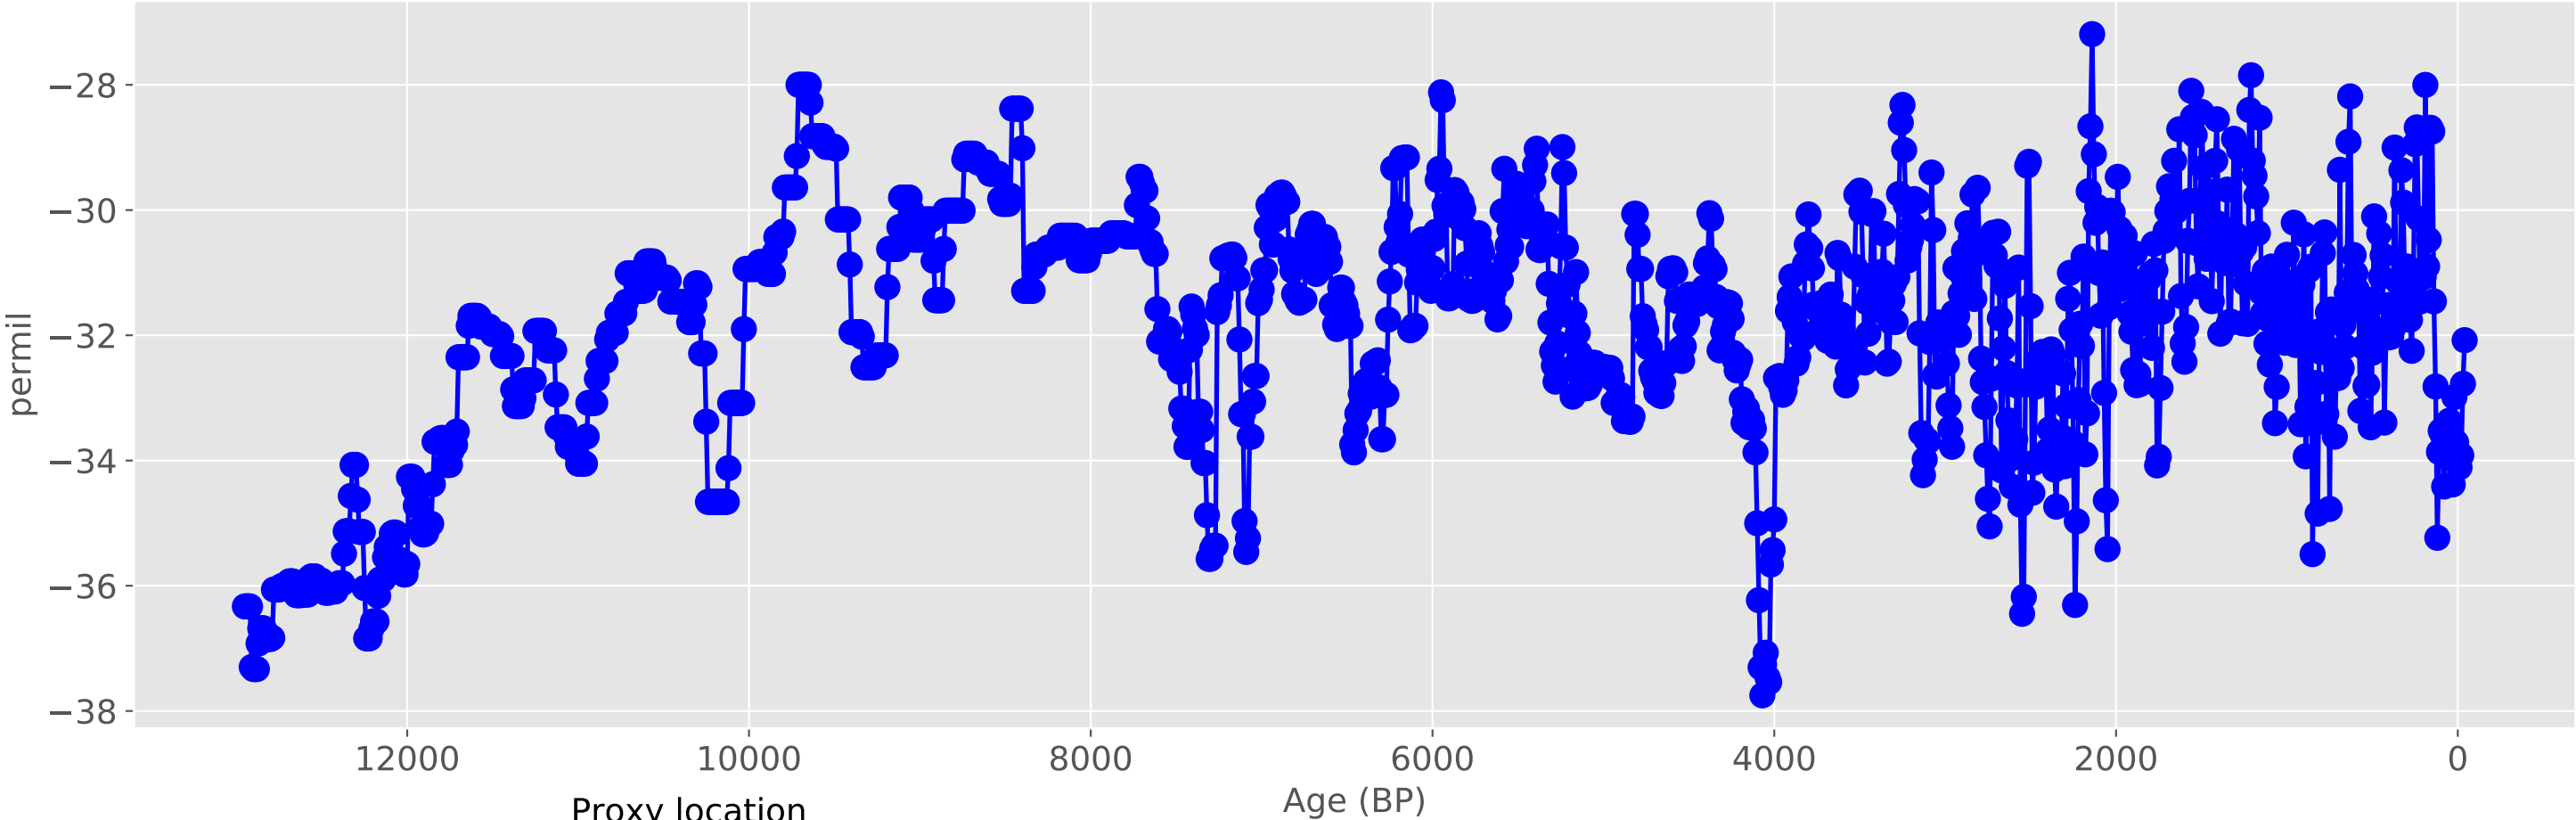

Proxy location  
(60.58 ° N, 140.50 ° W)

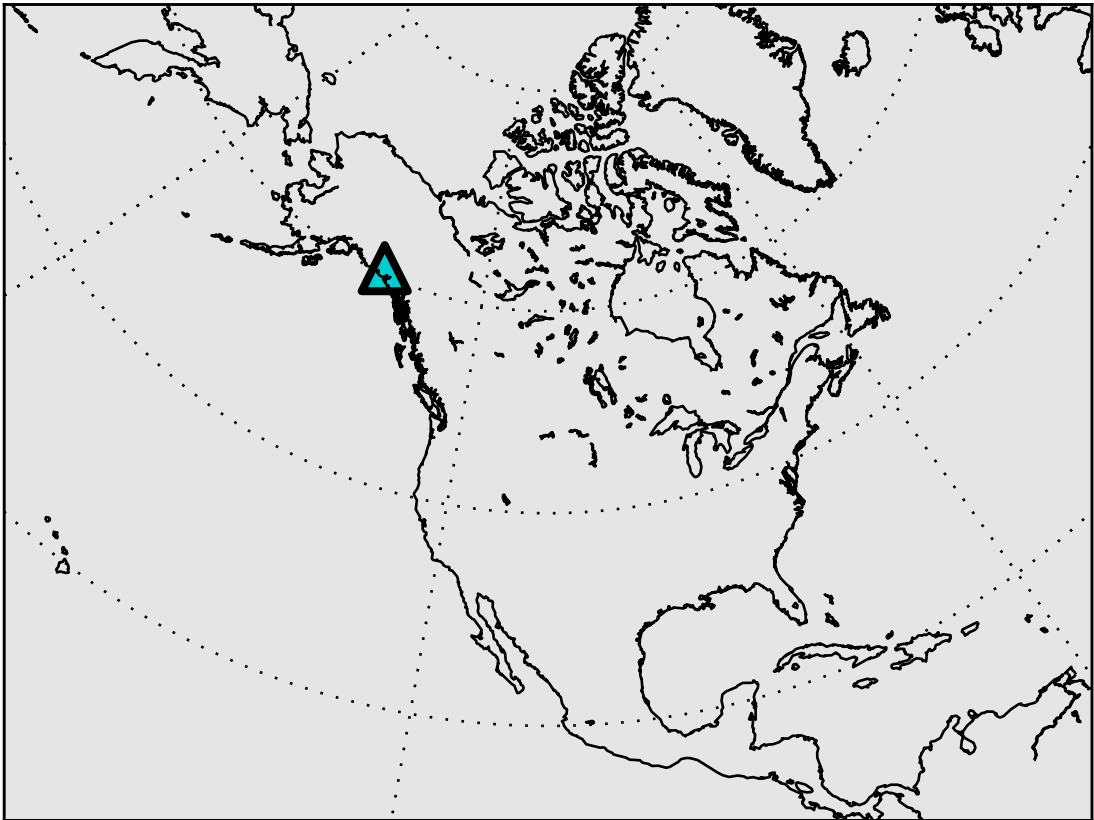

|                    |                                                                                              |
|--------------------|----------------------------------------------------------------------------------------------|
| Dataset name:      | Logan.Fisher.2008                                                                            |
| Archive type:      | GlacierIce                                                                                   |
| Proxy type:        | d18O                                                                                         |
| Variable name:     | d18O                                                                                         |
| Latitude ( ° N):   | 60.58                                                                                        |
| Longitude ( ° E):  | -140.5                                                                                       |
| Elevation (m):     | 5300.0                                                                                       |
| Interp. variable:  | MODE                                                                                         |
| Interp. detail:    | aleutianLow                                                                                  |
| Interp. season:    | winterOnly                                                                                   |
| Interp. direction: | negative                                                                                     |
| Pub. 1 title:      | The Mt Logan Holocene—late Wisconsinan isotope rec...                                        |
| Pub. 1 authors:    | Fisher, David;Osterberg, Erich;Dyke, Art;Dahl-Jens...                                        |
| Pub. 1 year:       | 2008                                                                                         |
| Pub. 1 DOI:        | 10.1177/0959683608092236                                                                     |
| Original data URL: | <a href="http://www.ncdc.noaa.gov/paleo/study/15444">www.ncdc.noaa.gov/paleo/study/15444</a> |

Proxy data and metadata  
Ice-other | d18O | DempsterPeatland.Porter.2019 | WEBfb6b61e3

Proxy time series: temperature

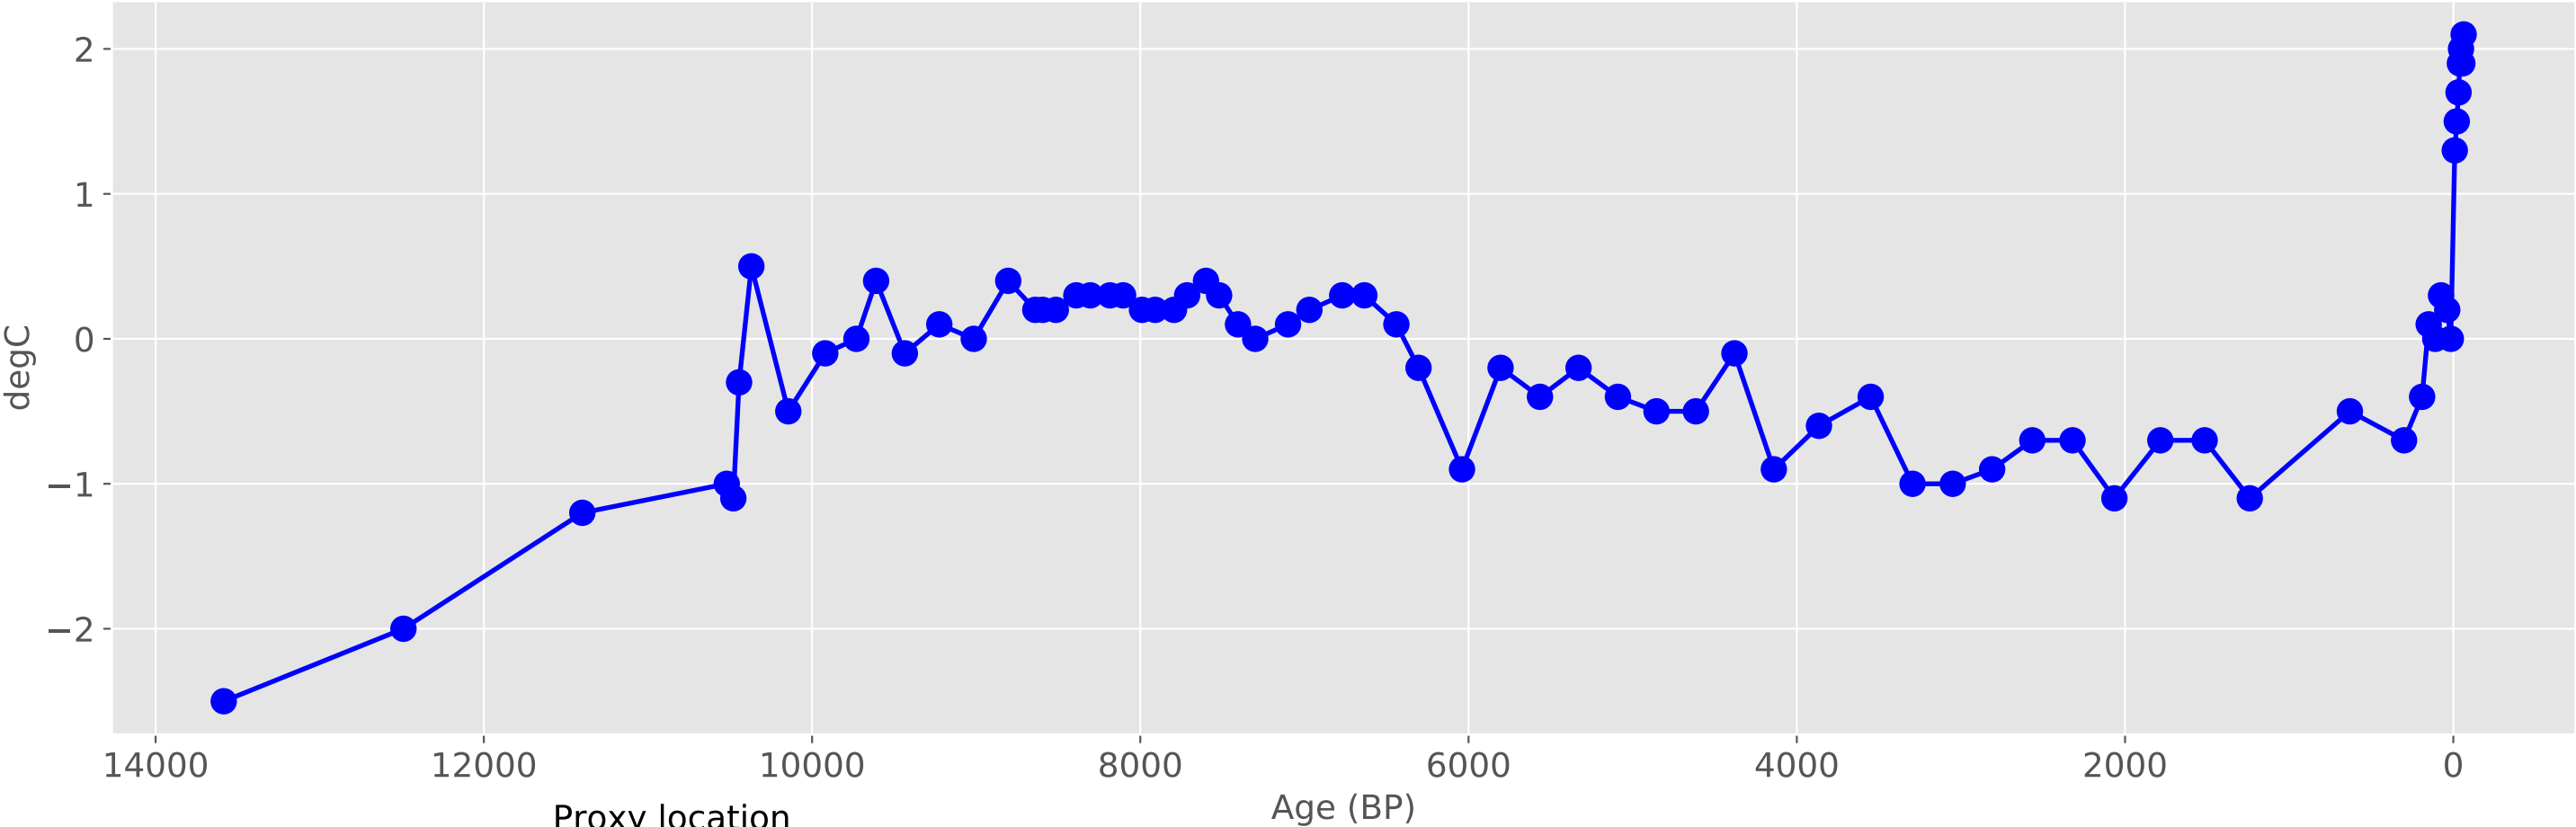

Proxy location  
(65.21 ° N, 138.32 ° W)

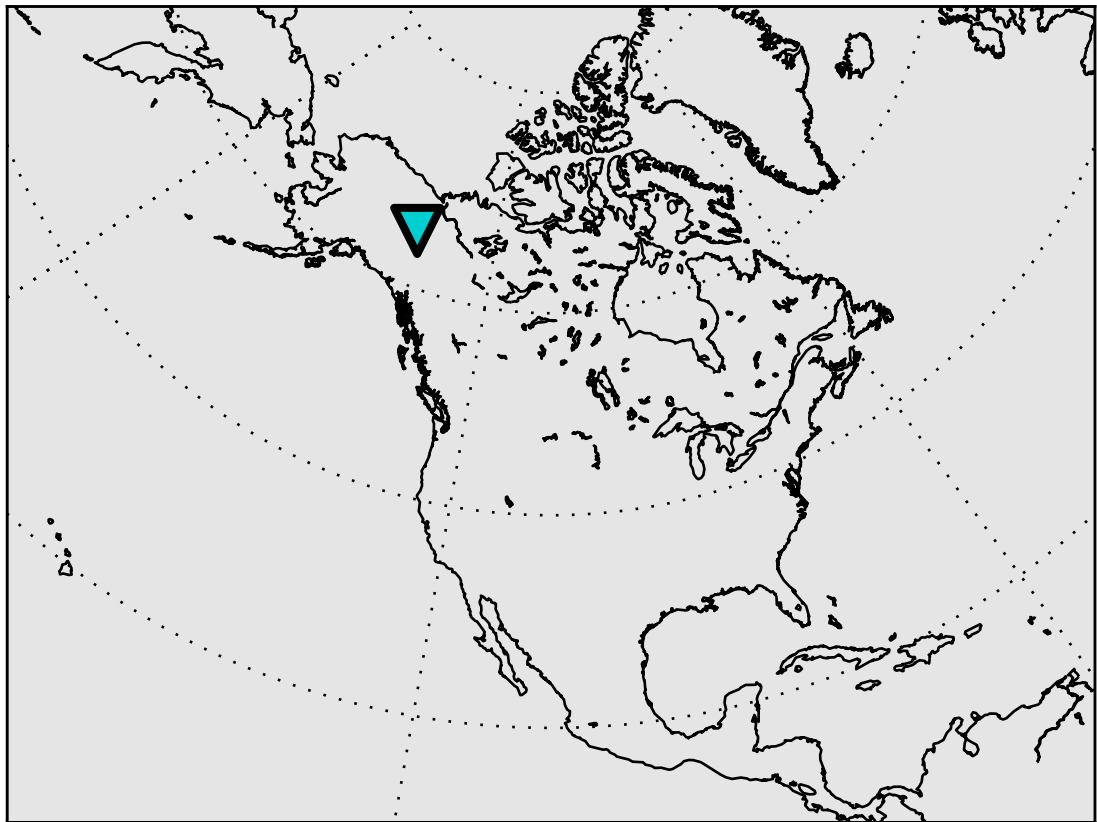

|                    |                                                       |
|--------------------|-------------------------------------------------------|
| Dataset name:      | DempsterPeatland.Porter.2019                          |
| Archive type:      | Ice-other                                             |
| Proxy type:        | d18O                                                  |
| Variable name:     | temperature                                           |
| Latitude ( ° N):   | 65.21                                                 |
| Longitude ( ° E):  | -138.32                                               |
| Elevation (m):     | 740.0                                                 |
| Interp. variable:  | T                                                     |
| Interp. detail:    | air@surface                                           |
| Interp. season:    | summerOnly                                            |
| Interp. direction: | positive                                              |
| Pub. 1 title:      | Recent summer warming in northwestern Canada excee... |
| Pub. 1 authors:    | Porter, Trevor J.; Schoenemann, Spruce W.; Davies,... |
| Pub. 1 year:       | 2019                                                  |
| Pub. 1 DOI:        | 10.1038/s41467-019-09622-y                            |
| Original data URL: | www.ncdc.noaa.gov/paleo/study/27330                   |



Proxy data and metadata  
LakeSediment | BSi | Hallet.McKay.2009 | PYTQ80LZ9WG

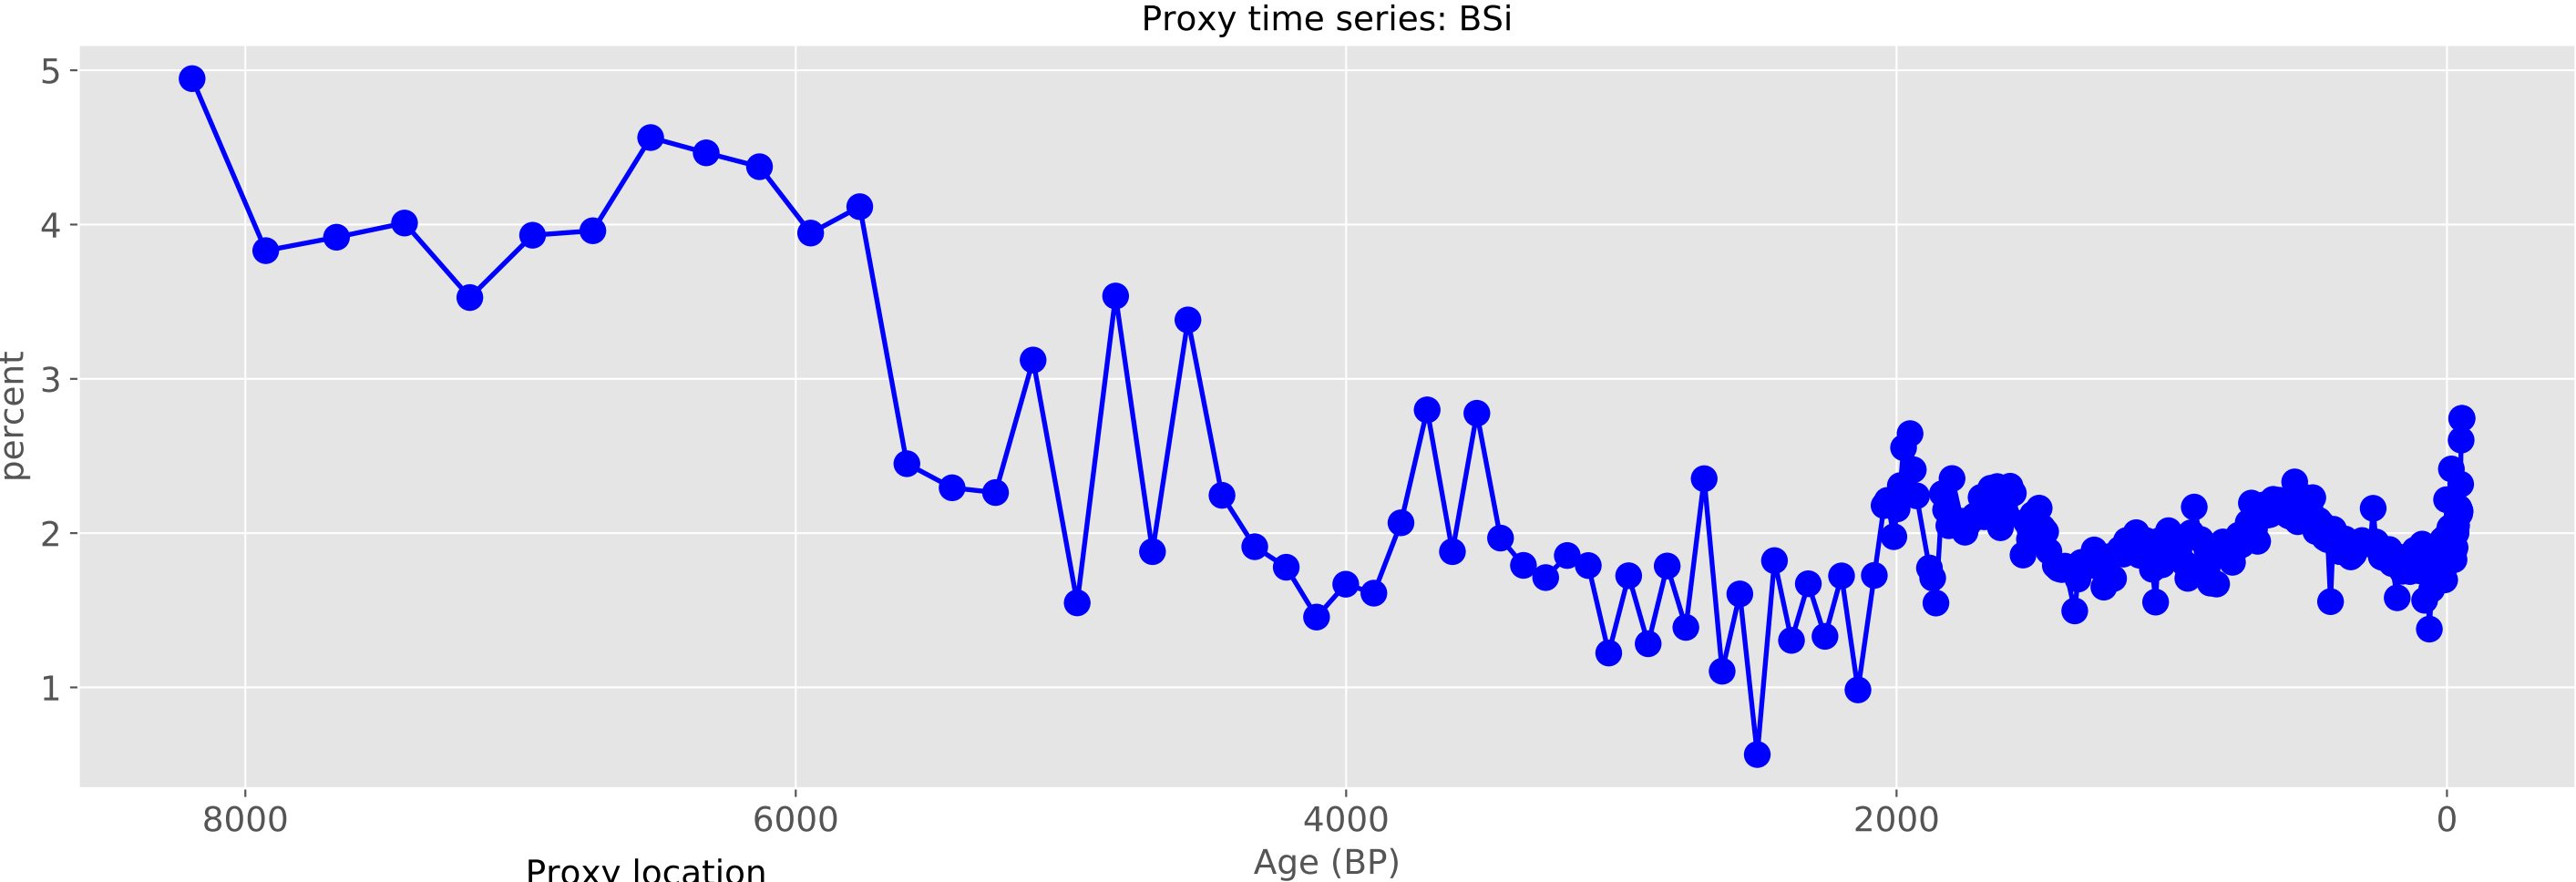

Proxy location  
(61.49 ° N, 146.24 ° W)

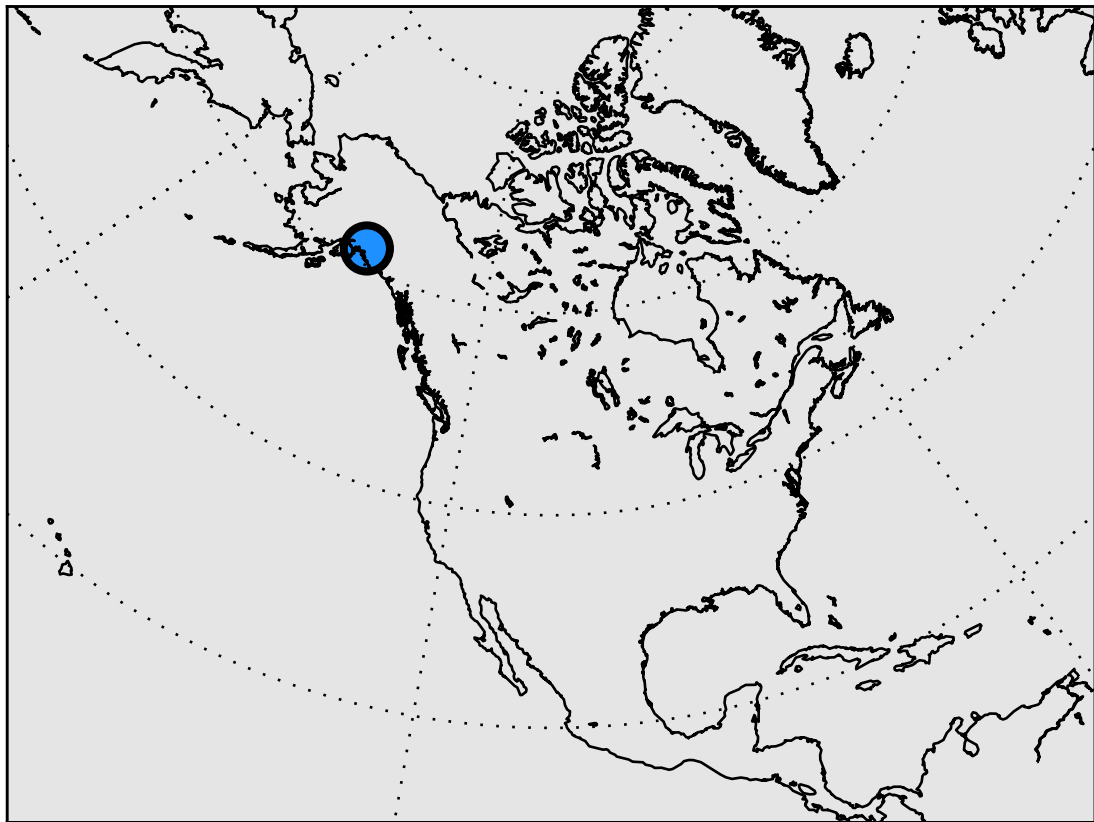

|                    |                                                       |
|--------------------|-------------------------------------------------------|
| Dataset name:      | Hallet.McKay.2009                                     |
| Archive type:      | LakeSediment                                          |
| Proxy type:        | BSi                                                   |
| Variable name:     | BSi                                                   |
| Latitude ( ° N):   | 61.4919                                               |
| Longitude ( ° E):  | -146.2389                                             |
| Elevation (m):     | 1128.0                                                |
| Interp. variable:  | T                                                     |
| Interp. detail:    | air@surface                                           |
| Interp. season:    | summerOnly                                            |
| Interp. direction: | positive                                              |
| Pub. 1 title:      | Holocene climate and glacier variability at Hallet... |
| Pub. 1 authors:    | McKay, Nicholas P.; Kaufman, Darrell S.               |
| Pub. 1 year:       | 2009                                                  |
| Pub. 1 DOI:        | 10.1007/s10933-008-9260-0                             |
| Original data URL: | www.ncdc.noaa.gov/paleo/study/15444                   |

# Proxy data and metadata

## LakeSediment | BSi | Kusawa.Chakraborty.2010 | PYT8QV5B55C

Proxy time series: BSi

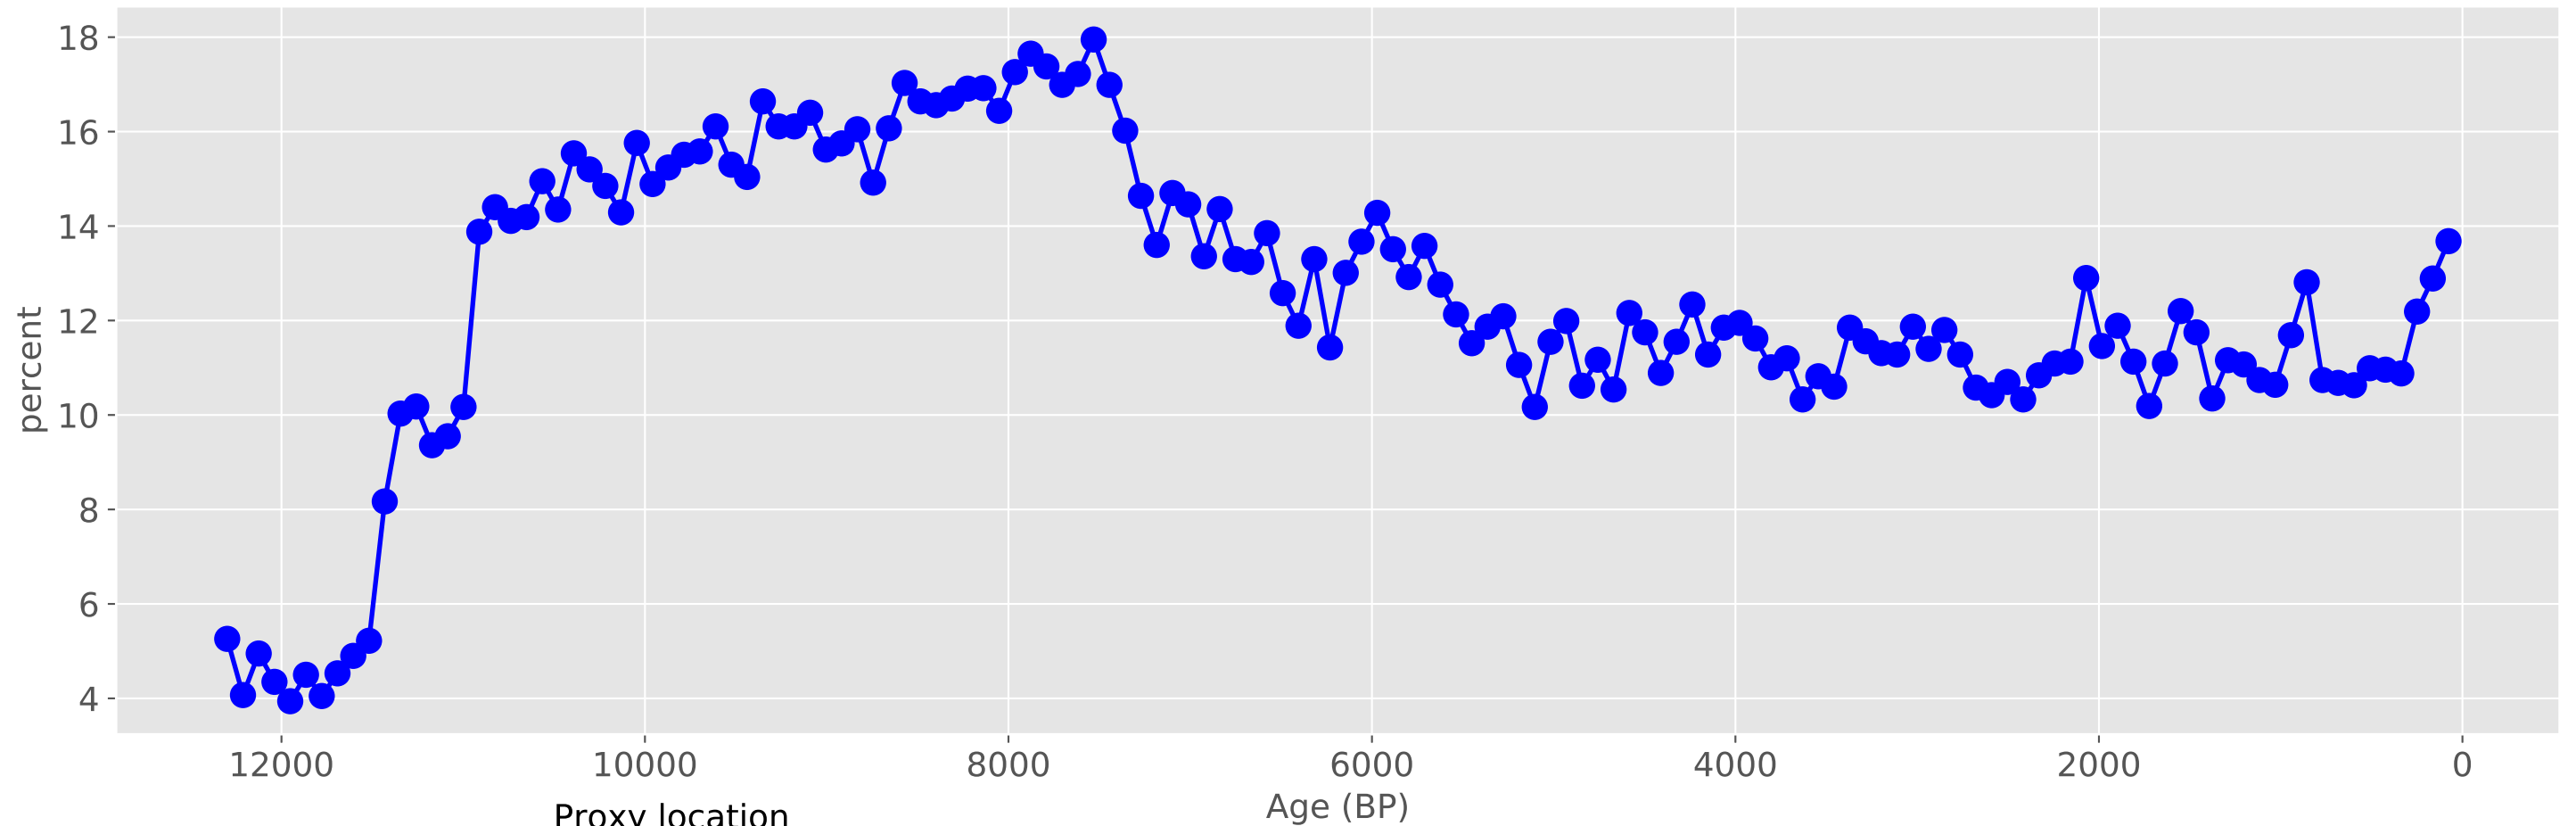

Proxy location  
(60.27° N, 136.18° W)

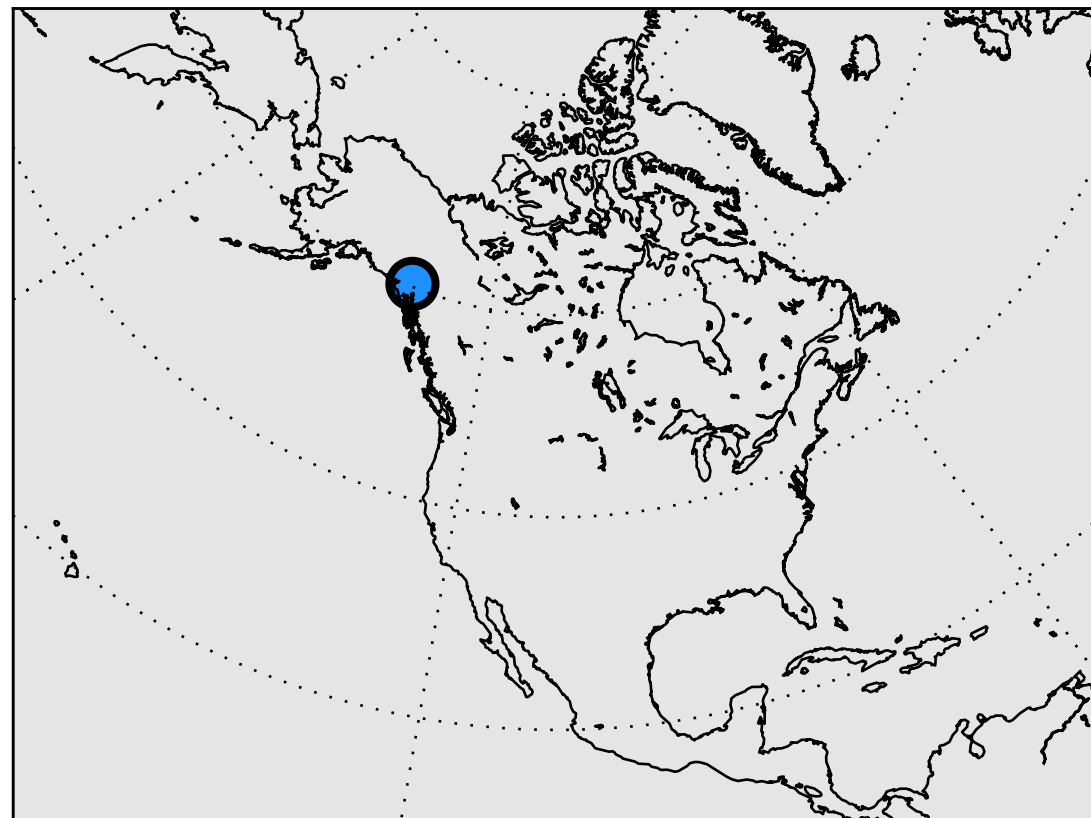

|                    |                                                                                              |
|--------------------|----------------------------------------------------------------------------------------------|
| Dataset name:      | Kusawa.Chakraborty.2010                                                                      |
| Archive type:      | LakeSediment                                                                                 |
| Proxy type:        | BSi                                                                                          |
| Variable name:     | BSi                                                                                          |
| Latitude (° N):    | 60.275                                                                                       |
| Longitude (° E):   | -136.182                                                                                     |
| Elevation (m):     | 671.0                                                                                        |
| Interp. variable:  | T                                                                                            |
| Interp. detail:    | air@surface                                                                                  |
| Interp. season:    | summerOnly                                                                                   |
| Interp. direction: | positive                                                                                     |
| Pub. 1 title:      | Holocene paleoenvironmental changes inferred from ...                                        |
| Pub. 1 authors:    | Chakraborty, Krish; Finkelstein, Sarah A.; Desloge...                                        |
| Pub. 1 year:       | 2010                                                                                         |
| Pub. 1 DOI:        | 10.1016/j.yqres.2010.04.011                                                                  |
| Original data URL: | <a href="http://www.ncdc.noaa.gov/paleo/study/15444">www.ncdc.noaa.gov/paleo/study/15444</a> |

Proxy data and metadata

LakeSediment | BSi | Lonespruce.Kaufman.2012 | PYTKYQ4C1WD

Proxy time series: BSi

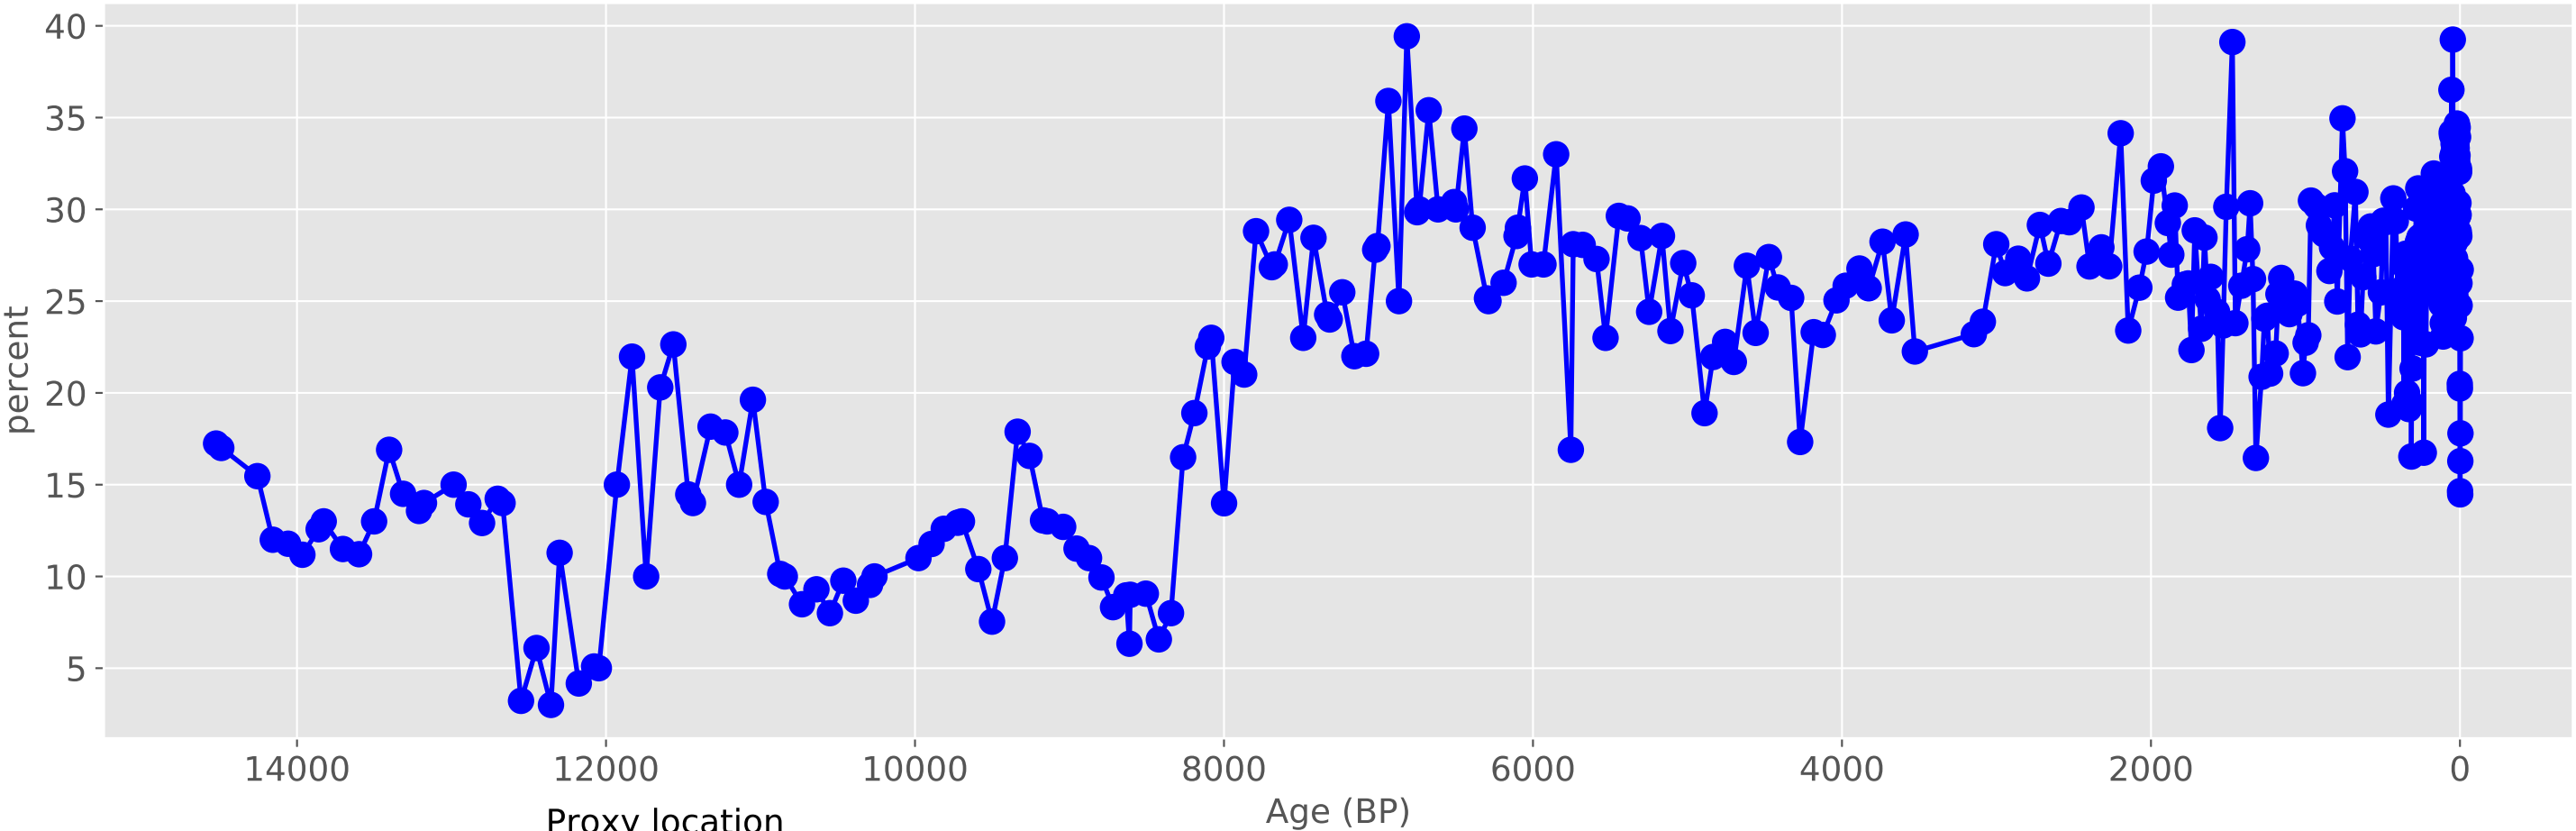

Proxy location  
(60.01 ° N, 159.14 ° W)

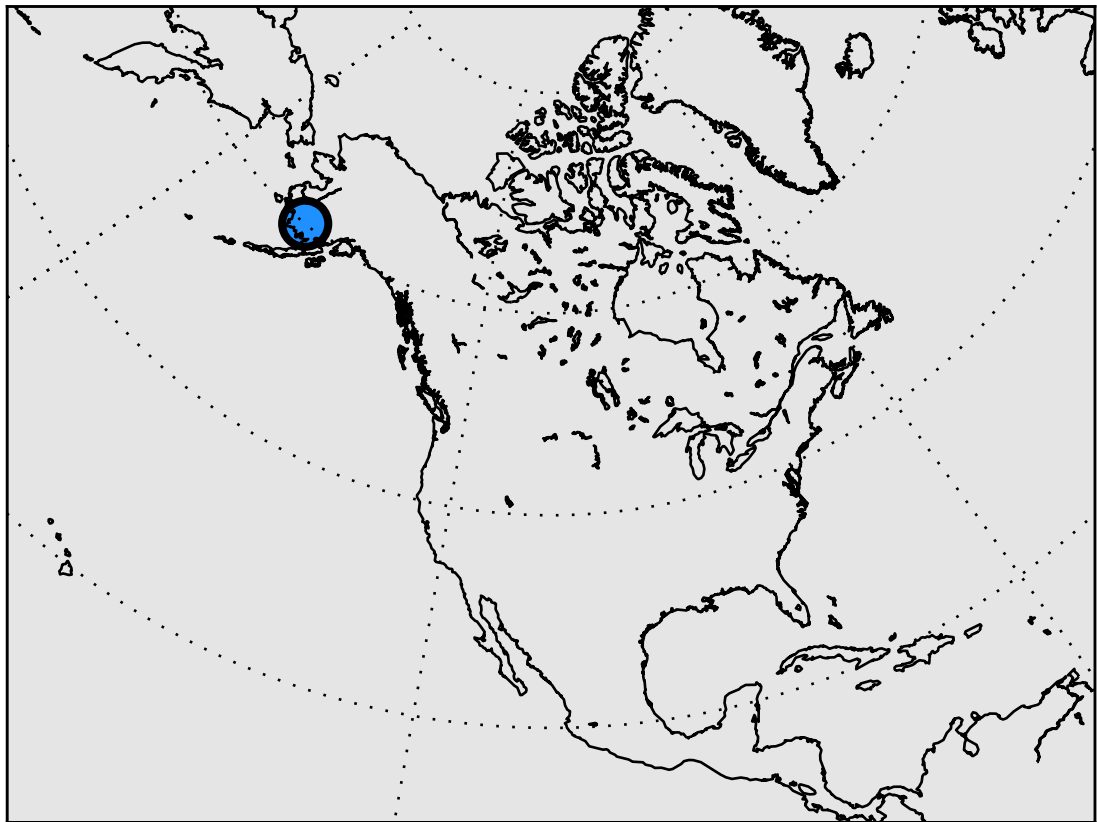

|                    |                                                                                              |
|--------------------|----------------------------------------------------------------------------------------------|
| Dataset name:      | Lonespruce.Kaufman.2012                                                                      |
| Archive type:      | LakeSediment                                                                                 |
| Proxy type:        | BSi                                                                                          |
| Variable name:     | BSi                                                                                          |
| Latitude ( ° N):   | 60.007                                                                                       |
| Longitude ( ° E):  | -159.143                                                                                     |
| Elevation (m):     | 135.0                                                                                        |
| Interp. variable:  | T                                                                                            |
| Interp. detail:    | air@surface                                                                                  |
| Interp. season:    | summerOnly                                                                                   |
| Interp. direction: | positive                                                                                     |
| Pub. 1 title:      | A multi-proxy record of the Last Glacial Maximum a...                                        |
| Pub. 1 authors:    | Kaufman, Darrell S.; Axford, Yarrow; Anderson, R. ...                                        |
| Pub. 1 year:       | 2012                                                                                         |
| Pub. 1 DOI:        | 10.1007/s10933-012-9607-4                                                                    |
| Original data URL: | <a href="http://www.ncdc.noaa.gov/paleo/study/15444">www.ncdc.noaa.gov/paleo/study/15444</a> |

Proxy data and metadata  
**LakeSediment | BSi | Eleanor.Gavin.2011 | WEB9a26a54b**

Proxy time series: temperature

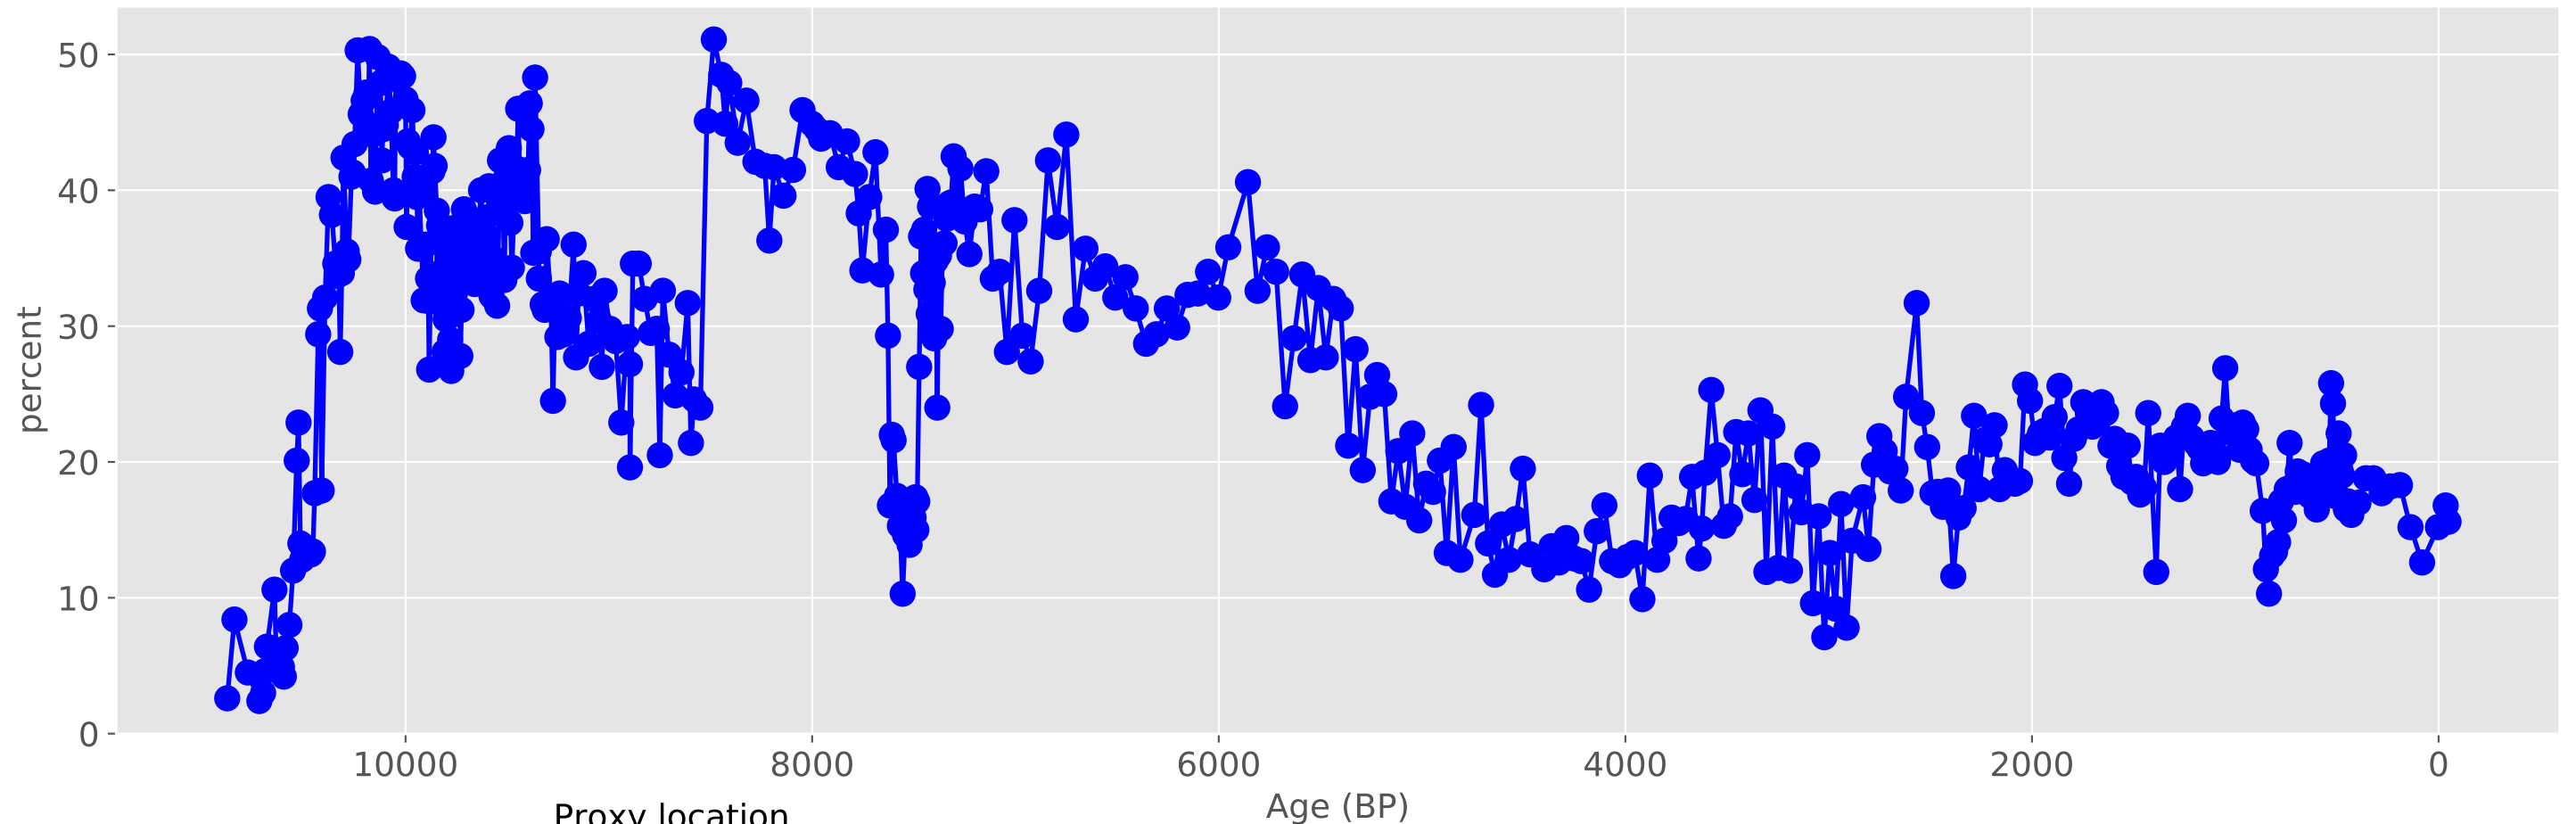

Proxy location  
(47.68 ° N, 124.02 ° W)

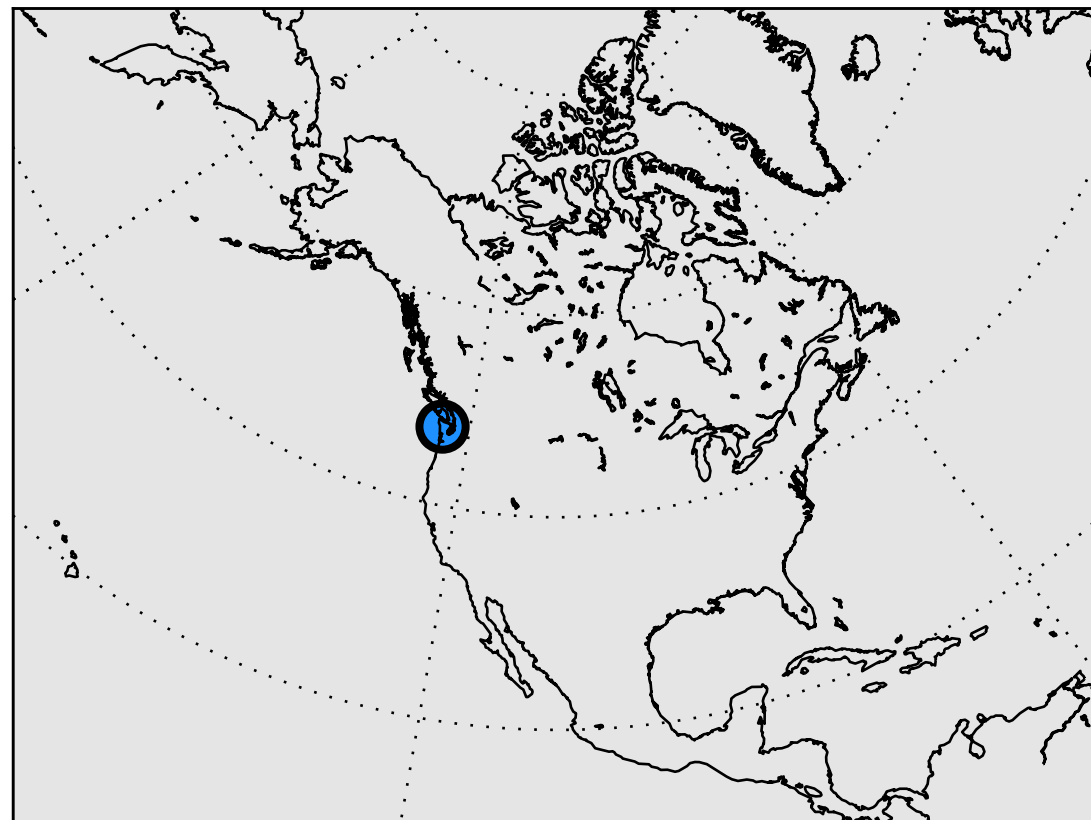

|                    |                                                                                                            |
|--------------------|------------------------------------------------------------------------------------------------------------|
| Dataset name:      | Eleanor.Gavin.2011                                                                                         |
| Archive type:      | LakeSediment                                                                                               |
| Proxy type:        | BSi                                                                                                        |
| Variable name:     | temperature                                                                                                |
| Latitude ( ° N):   | 47.68                                                                                                      |
| Longitude ( ° E):  | -124.02                                                                                                    |
| Elevation (m):     | 710.0                                                                                                      |
| Interp. variable:  | T                                                                                                          |
| Interp. detail:    | air@surface                                                                                                |
| Interp. season:    | summerOnly                                                                                                 |
| Interp. direction: | positive                                                                                                   |
| Pub. 1 title:      | Abrupt Holocene climate change and potential respo...                                                      |
| Pub. 1 authors:    | Gavin, Daniel G.; Henderson, Andrew C.G.; Westover...                                                      |
| Pub. 1 year:       | 2011                                                                                                       |
| Pub. 1 DOI:        | 10.1016/j.quascirev.2011.03.003                                                                            |
| Original data URL: | <a href="http://www.ncdc.noaa.gov/paleo-search/study/23371">www.ncdc.noaa.gov/paleo-search/study/23371</a> |

Proxy data and metadata

LakeSediment | CaCO3 | RantinLake.Pompeani.2012 | WEBdb2377bc

Proxy time series: CaCO3

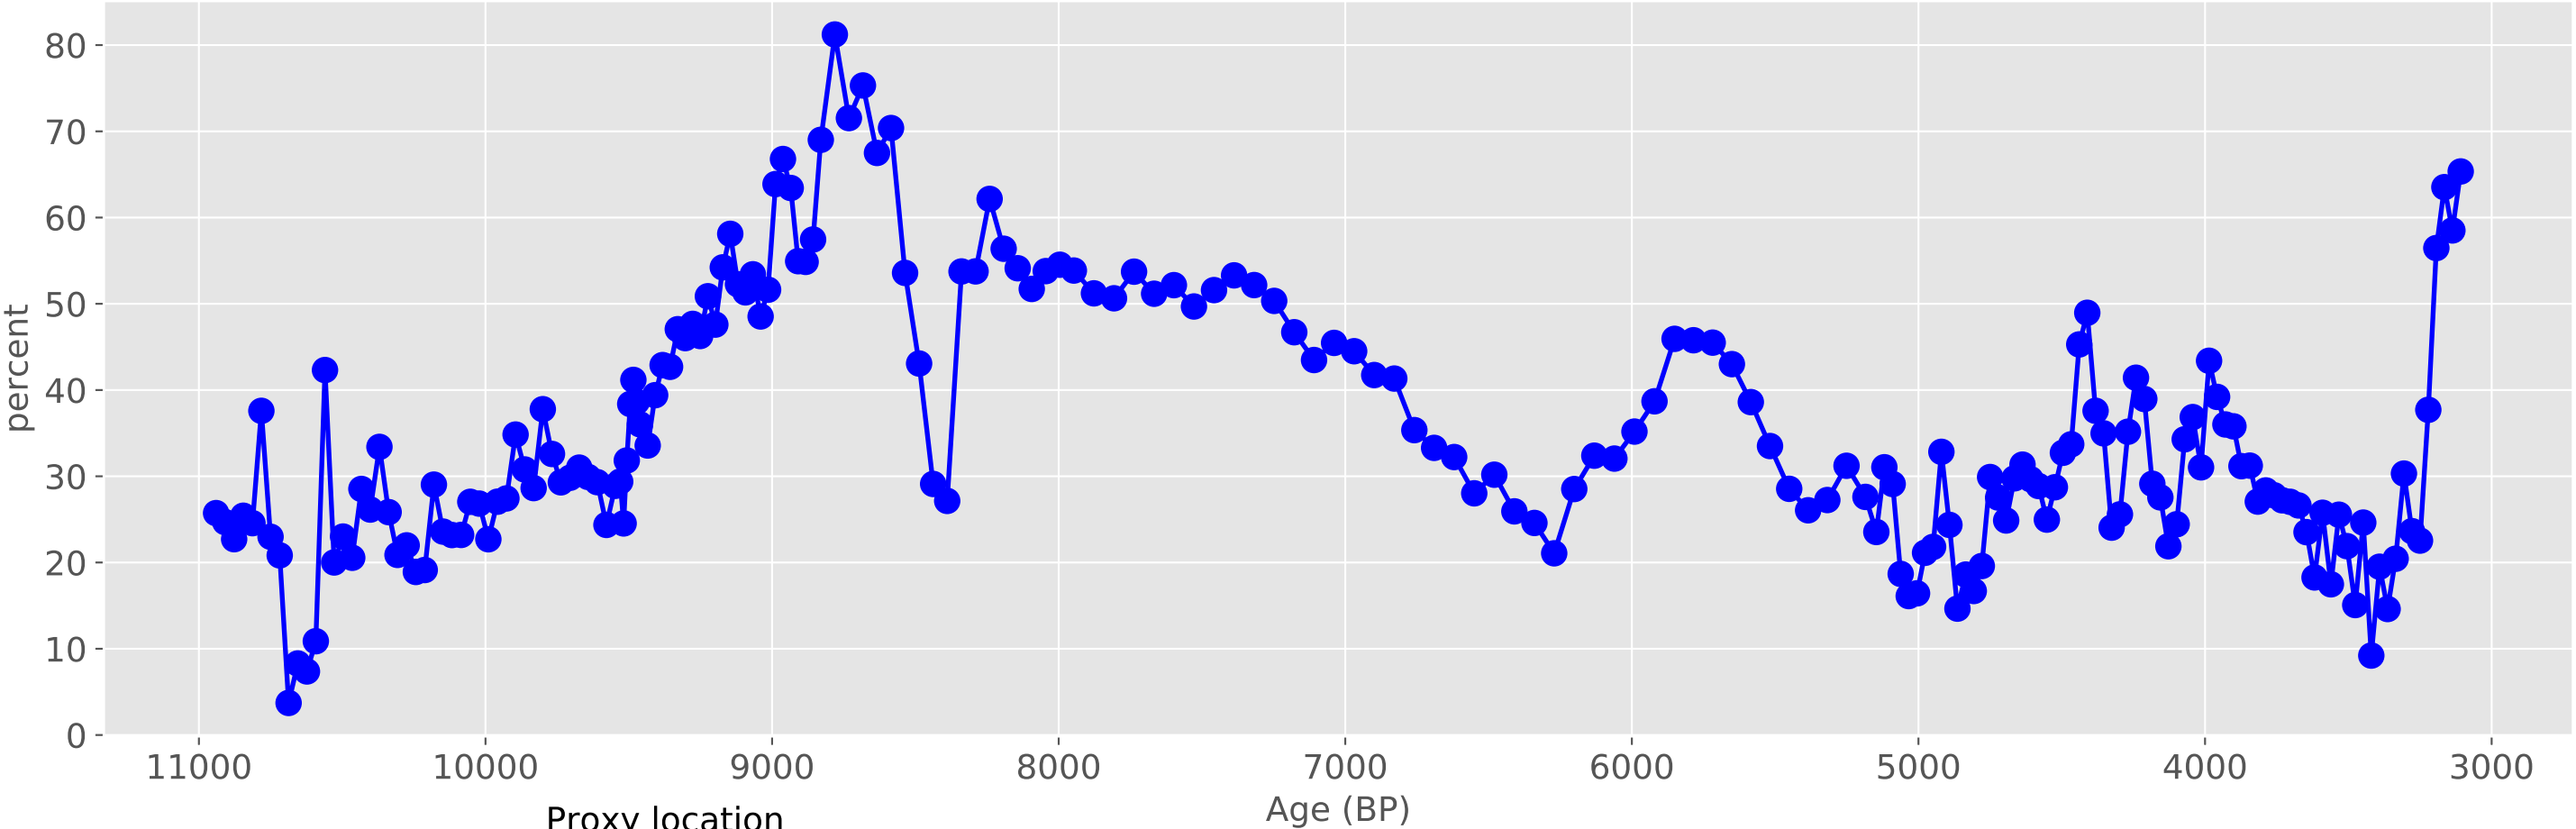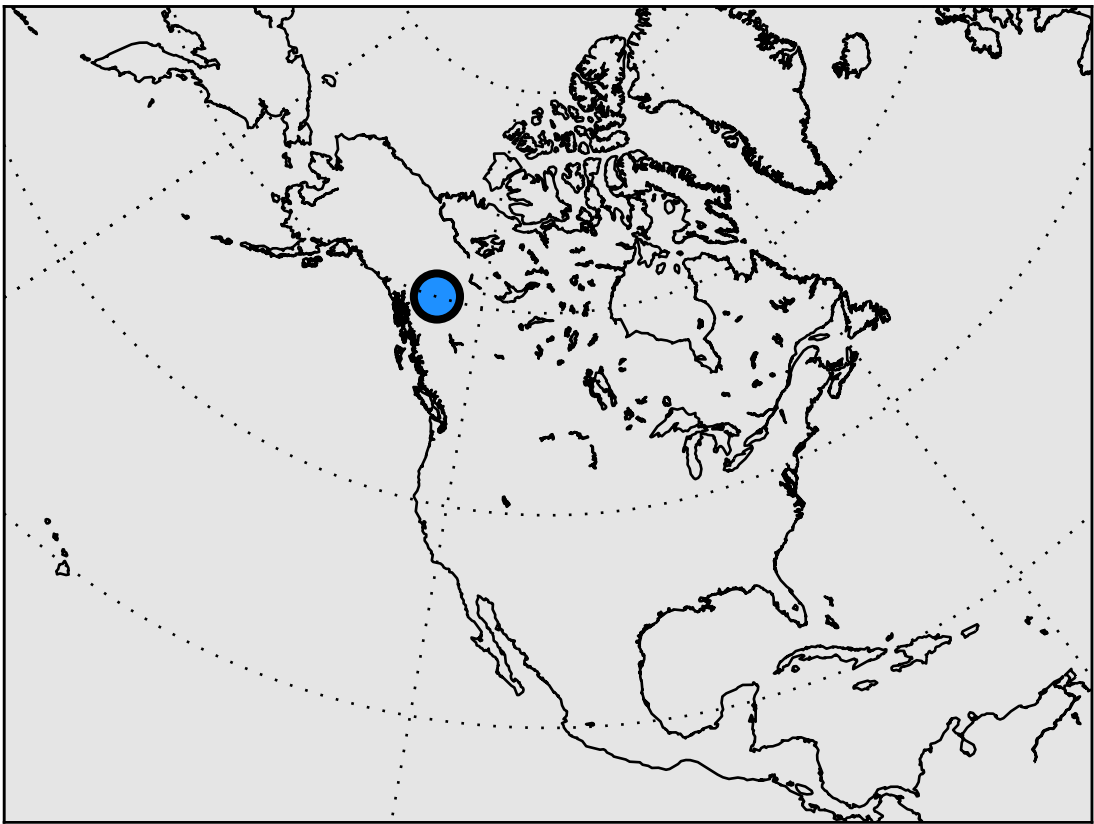

|                    |                                                       |
|--------------------|-------------------------------------------------------|
| Dataset name:      | RantinLake.Pompeani.2012                              |
| Archive type:      | LakeSediment                                          |
| Proxy type:        | CaCO3                                                 |
| Variable name:     | CaCO3                                                 |
| Latitude ( ° N):   | 60.0296                                               |
| Longitude ( ° E):  | -129.0323                                             |
| Elevation (m):     | 720.0                                                 |
| Interp. variable:  | P-E                                                   |
| Interp. detail:    | lakeLevel@surface                                     |
| Interp. season:    | annual                                                |
| Interp. direction: | negative                                              |
| Pub. 1 title:      | A sedimentary and geochemical record of water-leve... |
| Pub. 1 authors:    | Pompeani, D. P.;Steinman, B. A.;Abbott, M. B.         |
| Pub. 1 year:       | 2012                                                  |
| Pub. 1 DOI:        | 10.1007/s10933-012-9602-9                             |
| Original data URL: | www.ncdc.noaa.gov/paleo/study/13095                   |

Proxy data and metadata

LakeSediment | CaCO3 | CreviceLake.Whitlock.2012 | WEB29cf12bd

Proxy time series: CaCO3

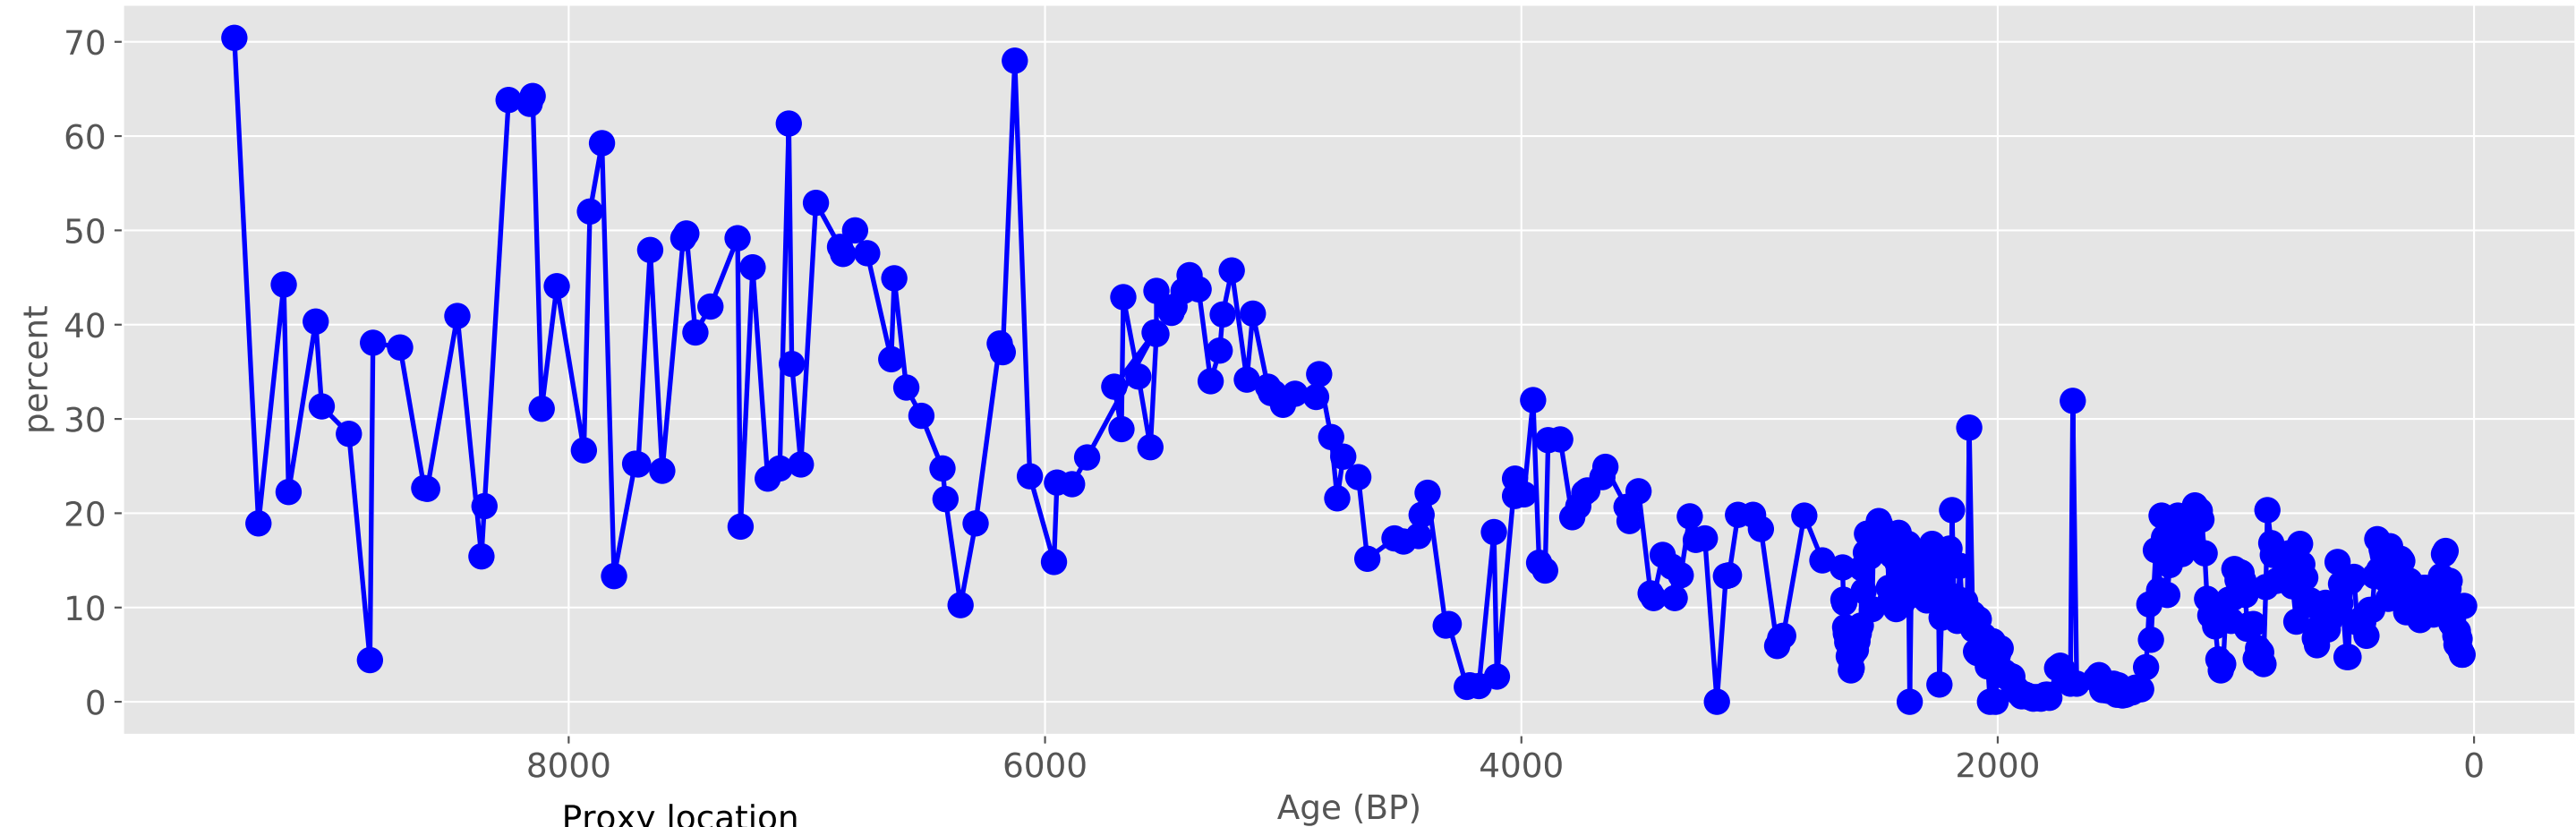

Proxy location  
(45.00 ° N, 110.58 ° W)

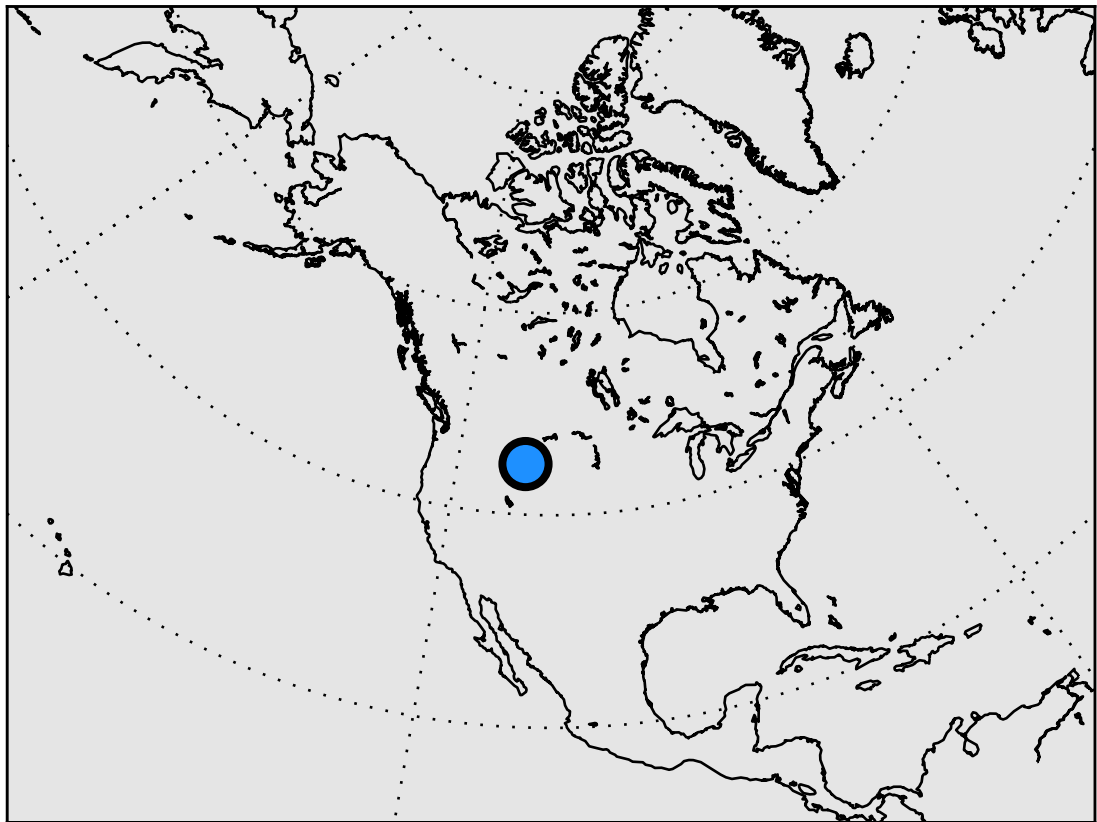

|                    |                                                       |
|--------------------|-------------------------------------------------------|
| Dataset name:      | CreviceLake.Whitlock.2012                             |
| Archive type:      | LakeSediment                                          |
| Proxy type:        | CaCO3                                                 |
| Variable name:     | CaCO3                                                 |
| Latitude ( ° N):   | 45.0                                                  |
| Longitude ( ° E):  | -110.58                                               |
| Elevation (m):     | 1713.0                                                |
| Interp. variable:  | T                                                     |
| Interp. detail:    | lake@surface                                          |
| Interp. season:    | summerOnly                                            |
| Interp. direction: | positive                                              |
| Pub. 1 title:      | Holocene seasonal variability inferred from multip... |
| Pub. 1 authors:    | Whitlock, Cathy;Dean, Walter E.;Fritz, Sherilyn C.... |
| Pub. 1 year:       | 2012                                                  |
| Pub. 1 DOI:        | 10.1016/j.palaeo.2012.03.001                          |
| Original data URL: | wNAm                                                  |



Proxy data and metadata

LakeSediment | CaCO3 | Chichancanab.Hodell.1995 | GH16551942

Proxy time series: CaCO3

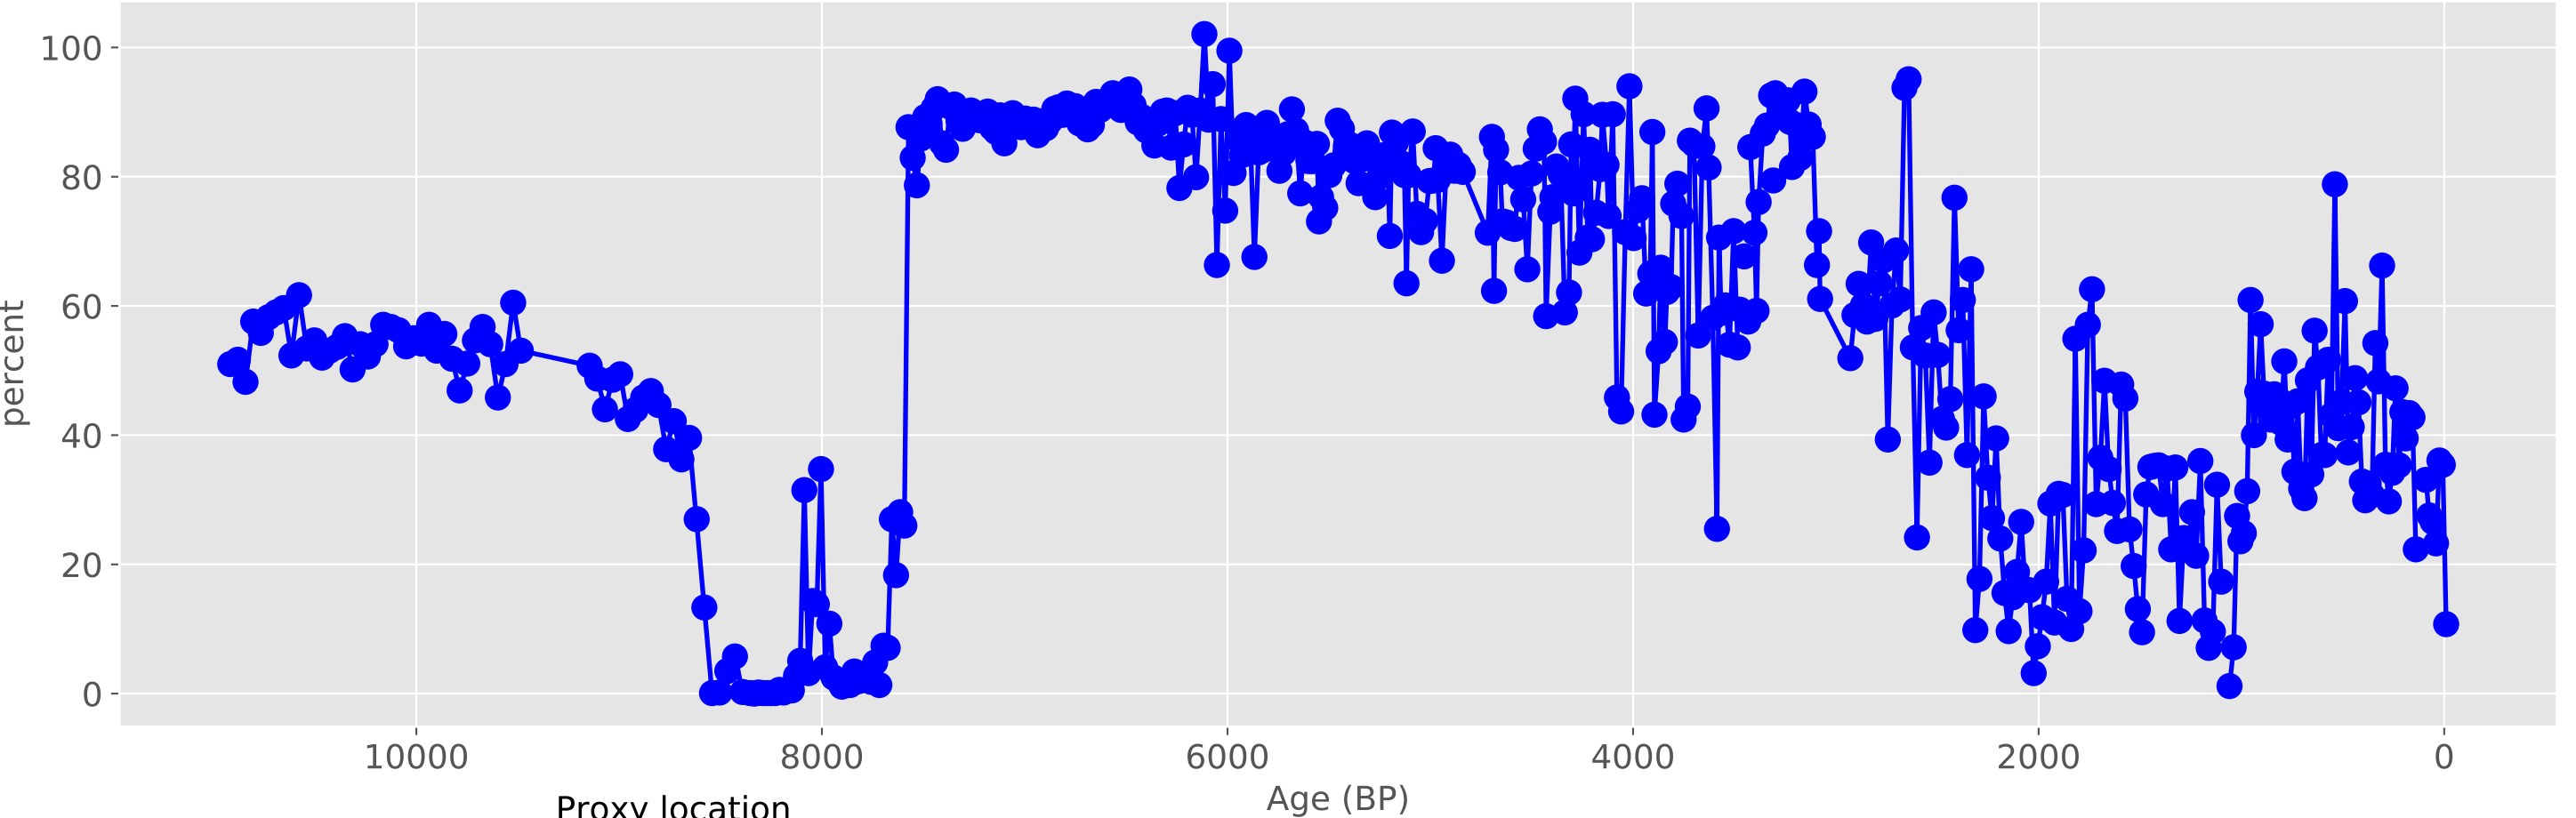

Proxy location  
(19.83° N, 88.75° W)

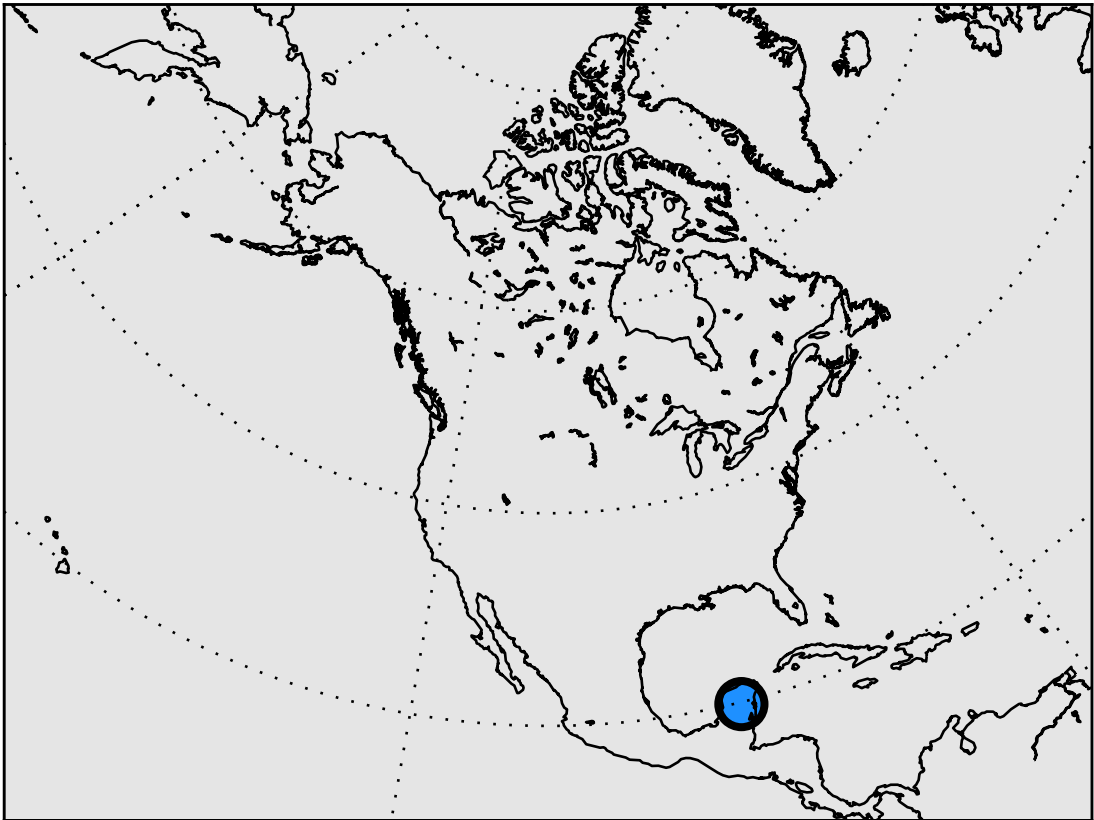

|                    |                                                                                            |
|--------------------|--------------------------------------------------------------------------------------------|
| Dataset name:      | Chichancanab.Hodell.1995                                                                   |
| Archive type:      | LakeSediment                                                                               |
| Proxy type:        | CaCO3                                                                                      |
| Variable name:     | CaCO3                                                                                      |
| Latitude (° N):    | 19.8333                                                                                    |
| Longitude (° E):   | -88.75                                                                                     |
| Elevation (m):     | 3.0                                                                                        |
| Interp. variable:  | P-E                                                                                        |
| Interp. detail:    | lake@surface                                                                               |
| Interp. season:    | summerOnly                                                                                 |
| Interp. direction: | positive                                                                                   |
| Pub. 1 title:      | Possible role of climate in the collapse of Classi...                                      |
| Pub. 1 authors:    | Hodell, David A.;Curtis, Jason H.;Brenner, Mark                                            |
| Pub. 1 year:       | 1995                                                                                       |
| Pub. 1 DOI:        | 10.1038/375391a0                                                                           |
| Original data URL: | <a href="http://www.ncdc.noaa.gov/paleo/study/5483">www.ncdc.noaa.gov/paleo/study/5483</a> |

Proxy data and metadata  
**LakeSediment | chironomid | Trout.Irvine.2012 | PYTD948WIQW**

Proxy time series: temperature

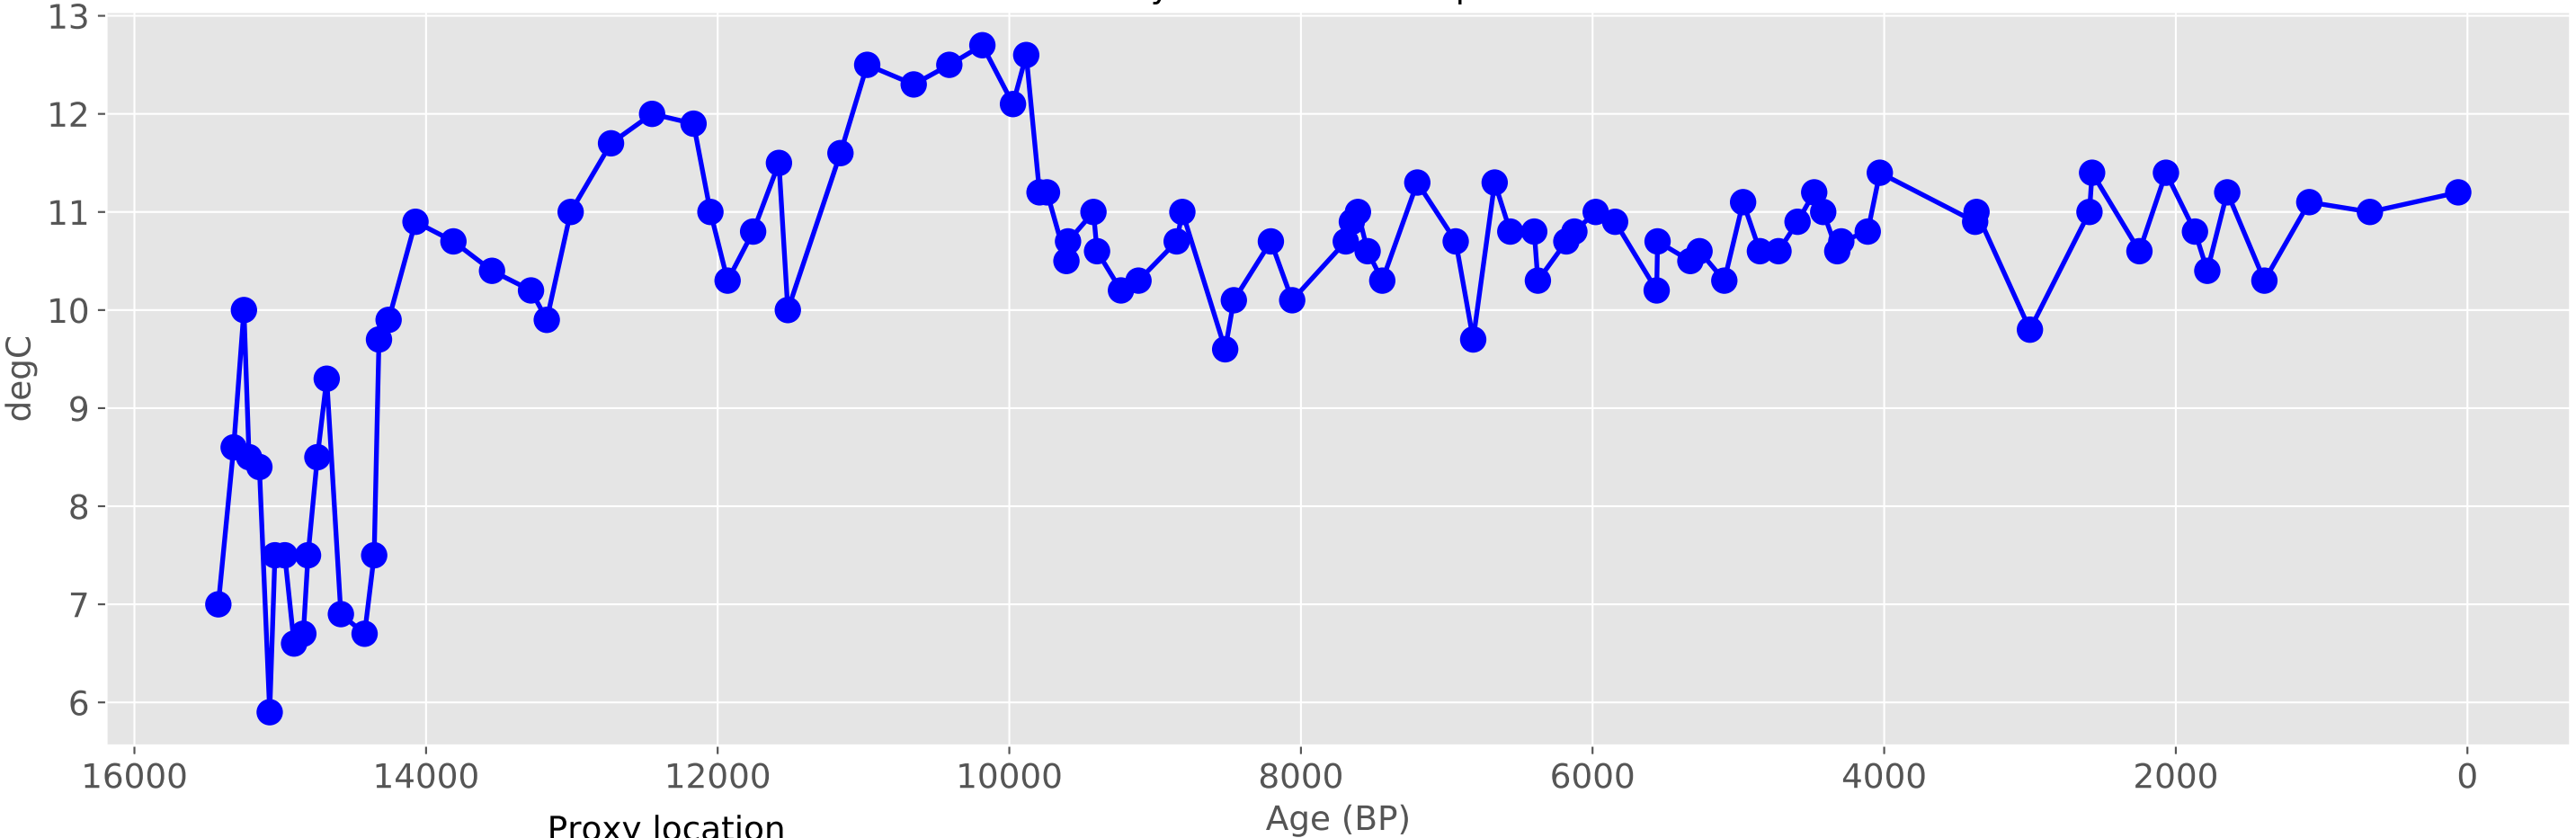

Proxy location  
(68.83 ° N, 138.75 ° W)

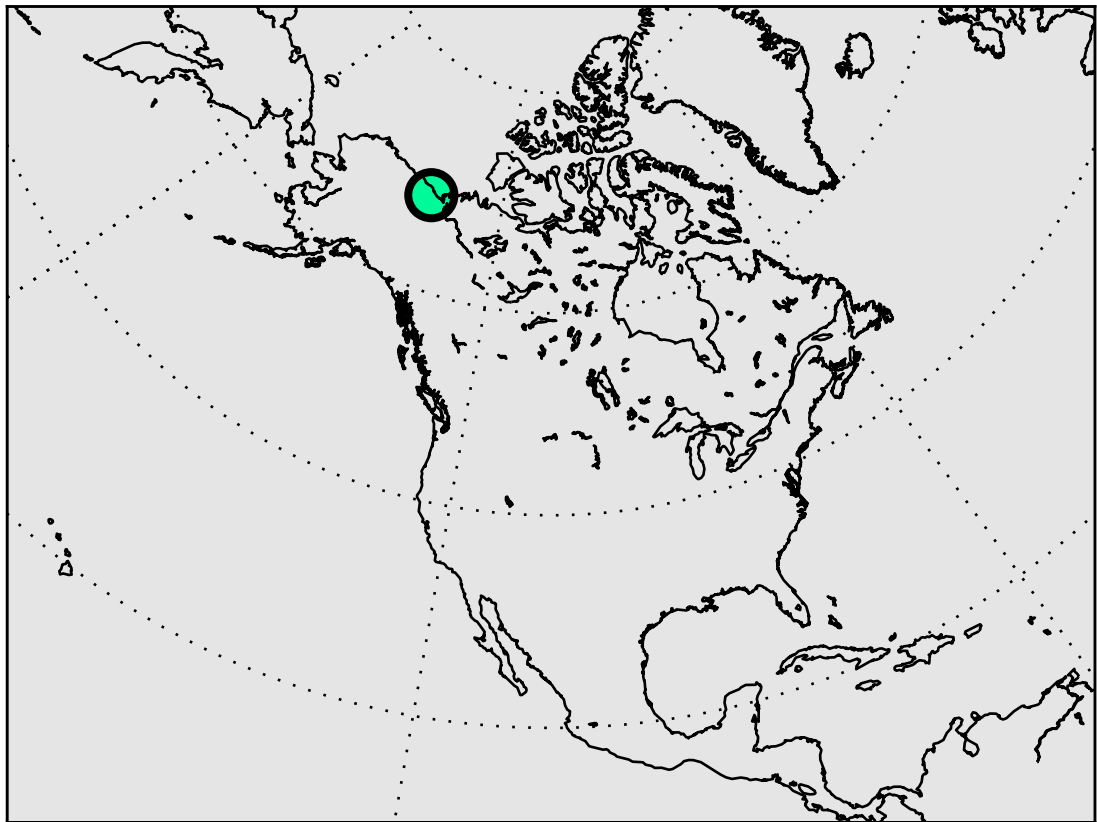

|                    |                                                                                              |
|--------------------|----------------------------------------------------------------------------------------------|
| Dataset name:      | Trout.Irvine.2012                                                                            |
| Archive type:      | LakeSediment                                                                                 |
| Proxy type:        | chironomid                                                                                   |
| Variable name:     | temperature                                                                                  |
| Latitude ( ° N):   | 68.828                                                                                       |
| Longitude ( ° E):  | -138.75                                                                                      |
| Elevation (m):     | 150.0                                                                                        |
| Interp. variable:  | T                                                                                            |
| Interp. detail:    | air@surface                                                                                  |
| Interp. season:    | summerOnly                                                                                   |
| Interp. direction: | positive                                                                                     |
| Pub. 1 title:      | Midge-inferred temperature reconstructions and veg...                                        |
| Pub. 1 authors:    | Irvine, Fonya; Cwynar, Les C.; Vermaire, Jesse C.;...                                        |
| Pub. 1 year:       | 2012                                                                                         |
| Pub. 1 DOI:        | 10.1007/s10933-012-9612-7                                                                    |
| Original data URL: | <a href="http://www.ncdc.noaa.gov/paleo/study/15444">www.ncdc.noaa.gov/paleo/study/15444</a> |

Proxy data and metadata  
LakeSediment | chironomid | ScreamingLynxLake.Clegg.2011 | R70zKk7ZGum

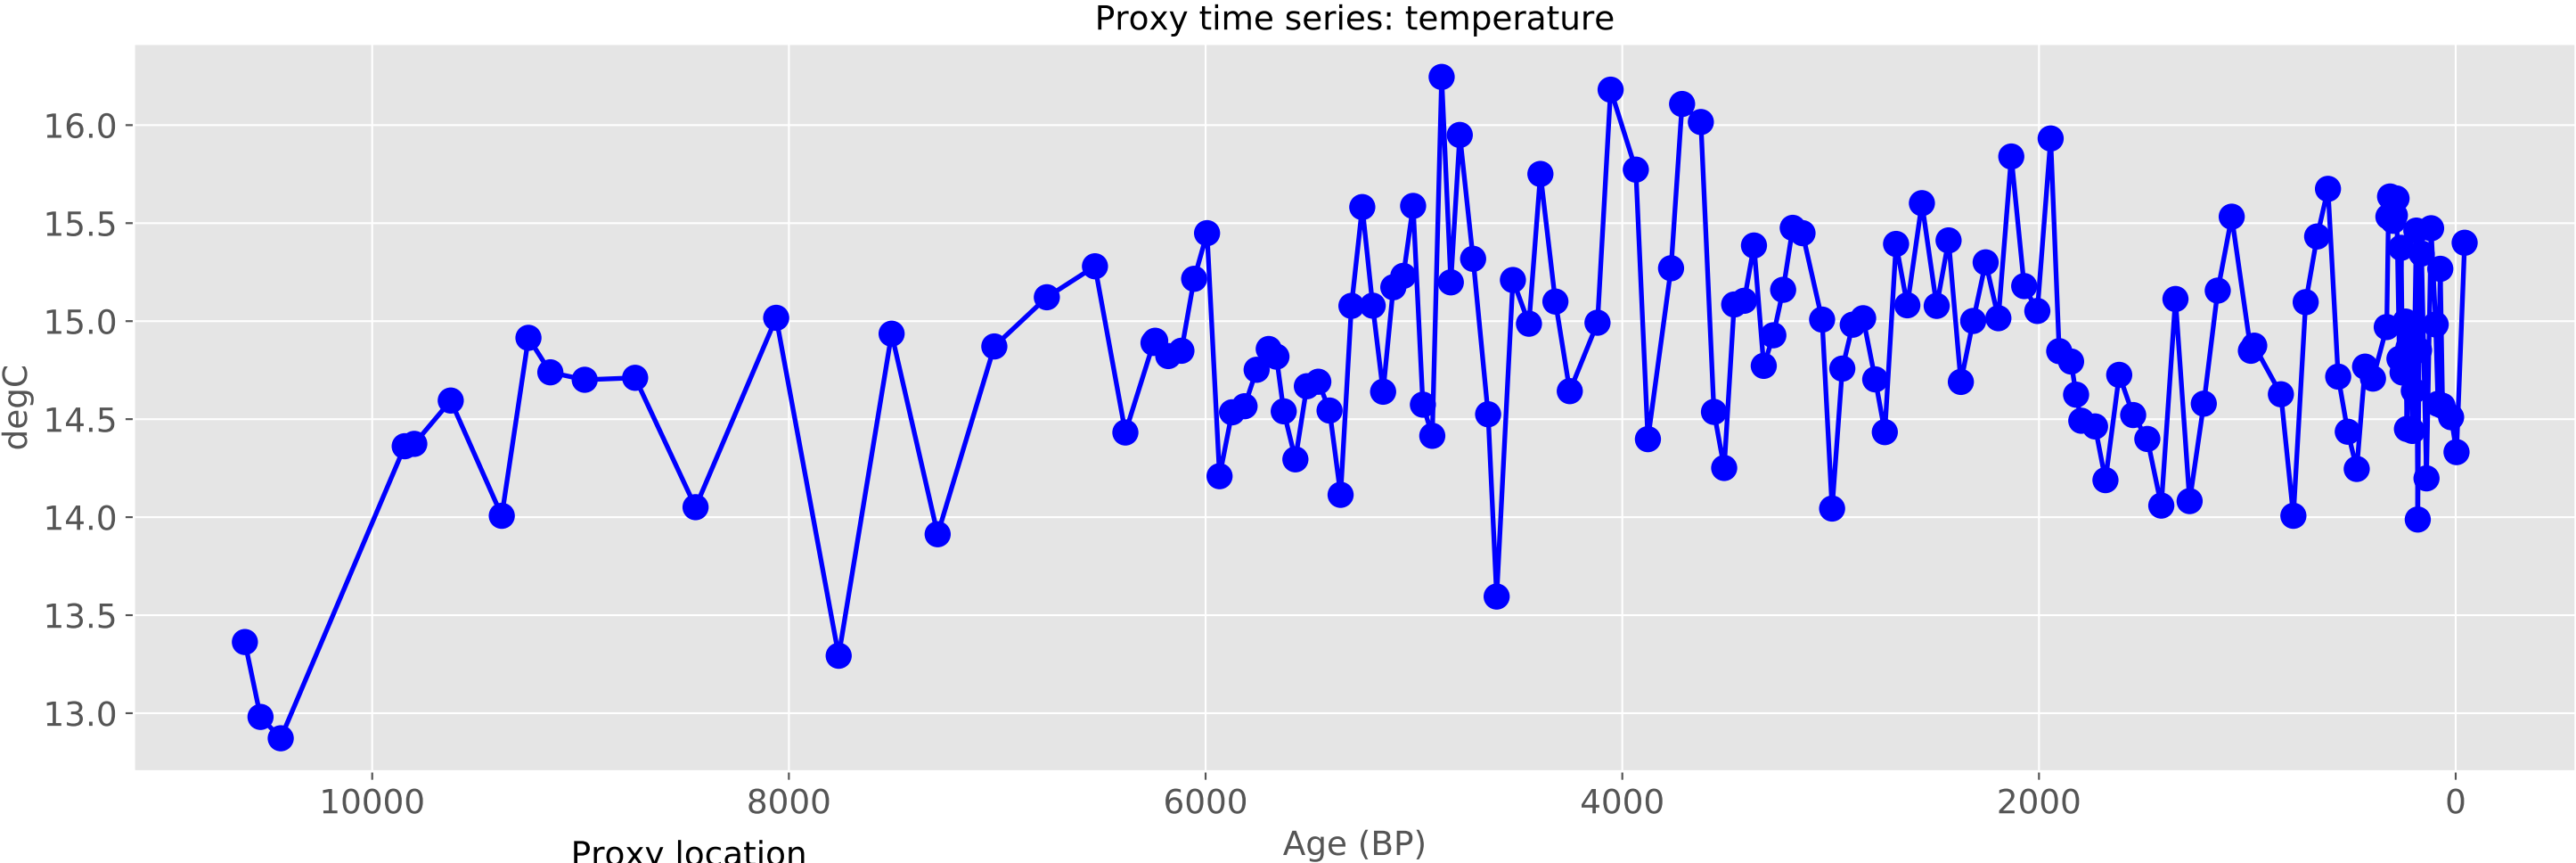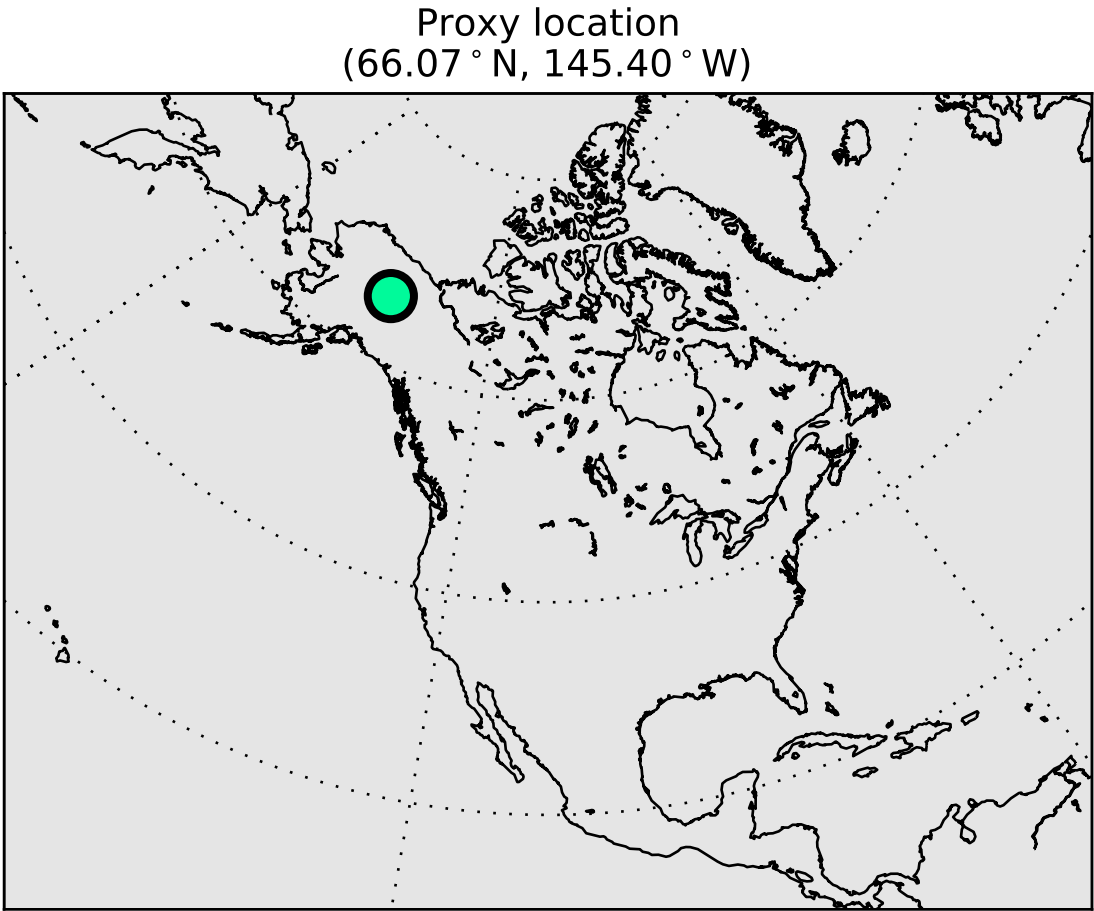

|                    |                                                                     |
|--------------------|---------------------------------------------------------------------|
| Dataset name:      | ScreamingLynxLake.Clegg.2011                                        |
| Archive type:      | LakeSediment                                                        |
| Proxy type:        | chironomid                                                          |
| Variable name:     | temperature                                                         |
| Latitude ( ° N):   | 66.0667                                                             |
| Longitude ( ° E):  | -145.4                                                              |
| Elevation (m):     | 223.0                                                               |
| Interp. variable:  | T                                                                   |
| Interp. detail:    | air@surface                                                         |
| Interp. season:    | summerOnly                                                          |
| Interp. direction: | positive                                                            |
| Pub. 1 title:      | Nonlinear response of summer temperature to Holocene climate change |
| Pub. 1 authors:    | Clegg, B. F.; Kelly, R.; Clarke, G. H.; Walker, I. D.               |
| Pub. 1 year:       | 2011                                                                |
| Pub. 1 DOI:        | 10.1073/pnas.1110913108                                             |
| Original data URL: | www.ncdc.noaa.gov/paleo/study/15444                                 |

Proxy data and metadata  
**LakeSediment | chironomid | CarletonLake.Upiter.2014 | RcIKPHfeaEb**

Proxy time series: temperatureComposite

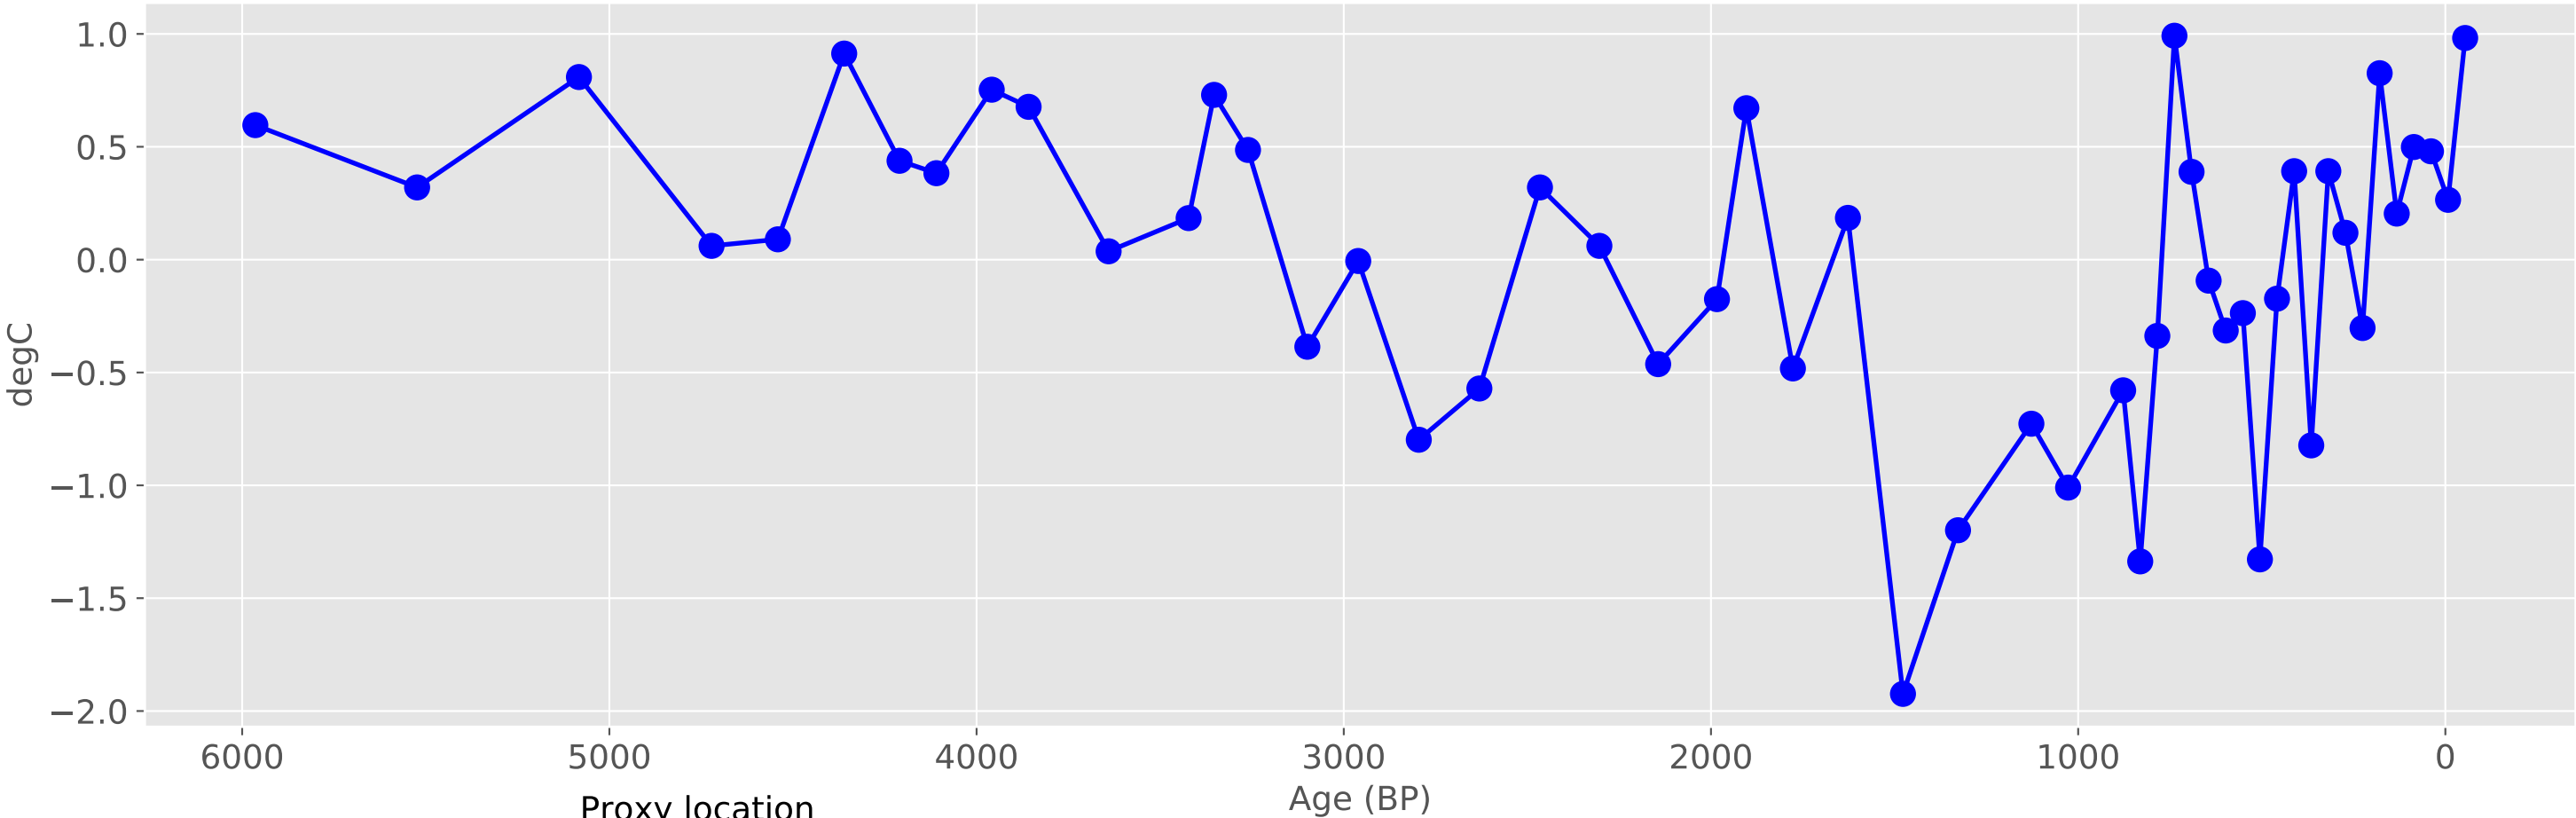

Proxy location  
(64.26 ° N, 110.10 ° W)

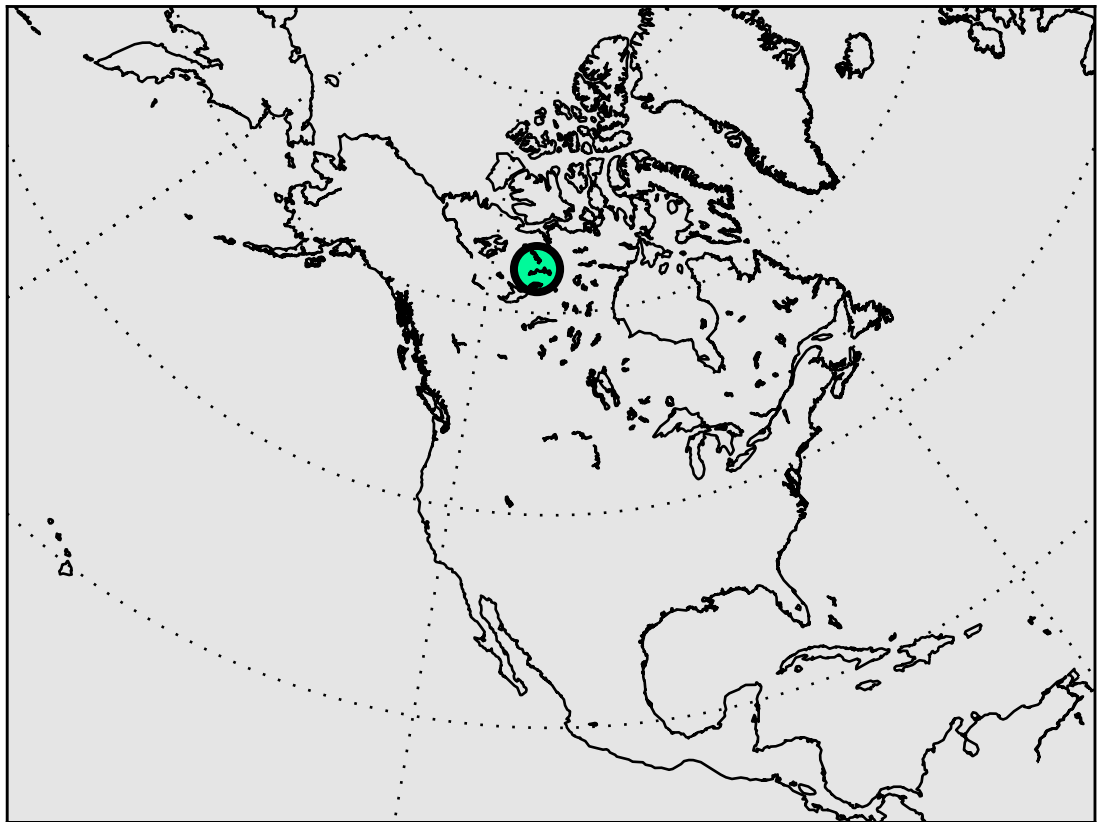

|                    |                                                                                              |
|--------------------|----------------------------------------------------------------------------------------------|
| Dataset name:      | CarletonLake.Upiter.2014                                                                     |
| Archive type:      | LakeSediment                                                                                 |
| Proxy type:        | chironomid                                                                                   |
| Variable name:     | temperatureComposite                                                                         |
| Latitude ( ° N):   | 64.2572                                                                                      |
| Longitude ( ° E):  | -110.1008                                                                                    |
| Elevation (m):     | 420.0                                                                                        |
| Interp. variable:  | T                                                                                            |
| Interp. detail:    | air@surface                                                                                  |
| Interp. season:    | summerOnly                                                                                   |
| Interp. direction: | positive                                                                                     |
| Pub. 1 title:      | Middle to late Holocene chironomid-inferred July t...                                        |
| Pub. 1 authors:    | Upiter, Lindsay M.; Vermaire, Jesse C.; Patterson,...                                        |
| Pub. 1 year:       | 2014                                                                                         |
| Pub. 1 DOI:        | 10.1007/s10933-014-9775-5                                                                    |
| Original data URL: | <a href="http://www.ncdc.noaa.gov/paleo/study/16296">www.ncdc.noaa.gov/paleo/study/16296</a> |

Proxy data and metadata

LakeSediment | chironomid | Quartz.Wooller.2012 | PYT66RBVNK6

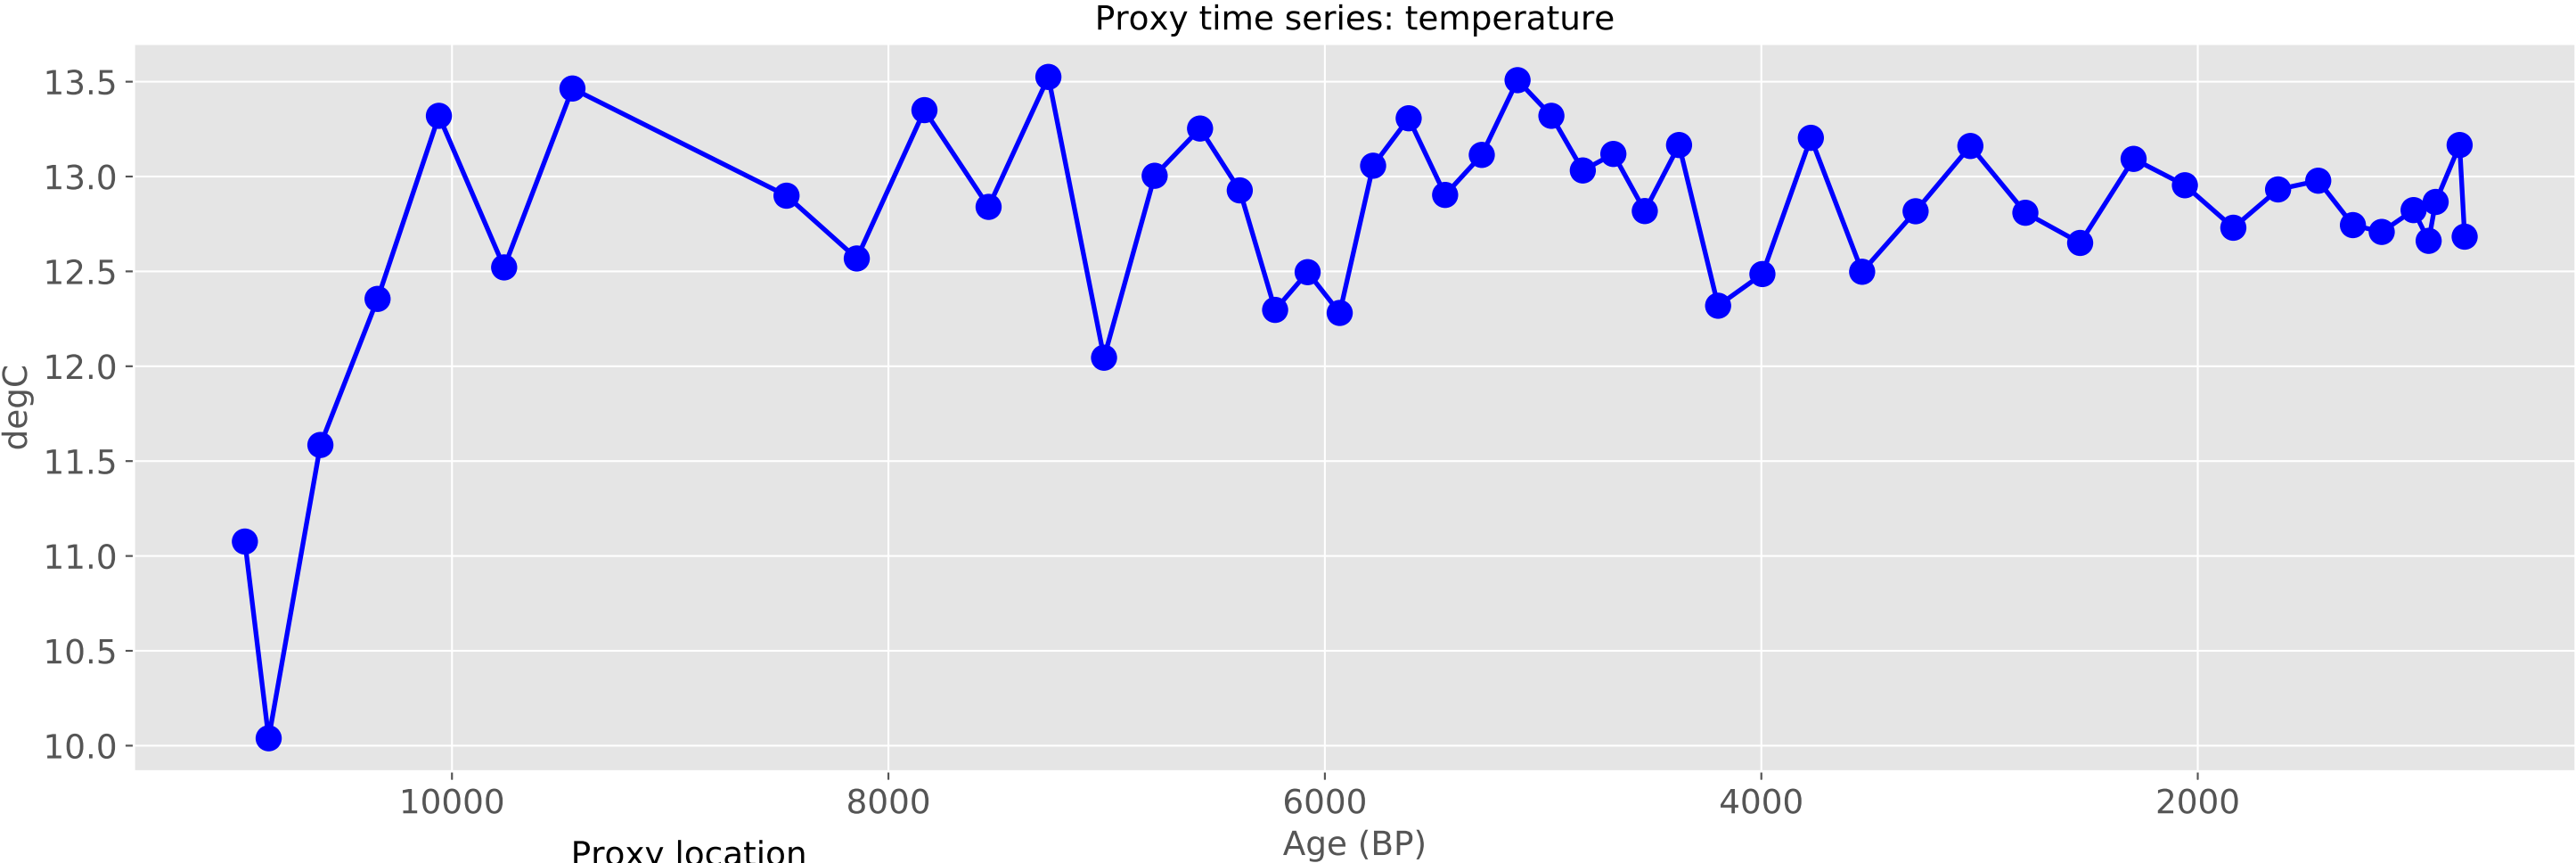

Proxy location  
(64.21 ° N, 145.81 ° W)

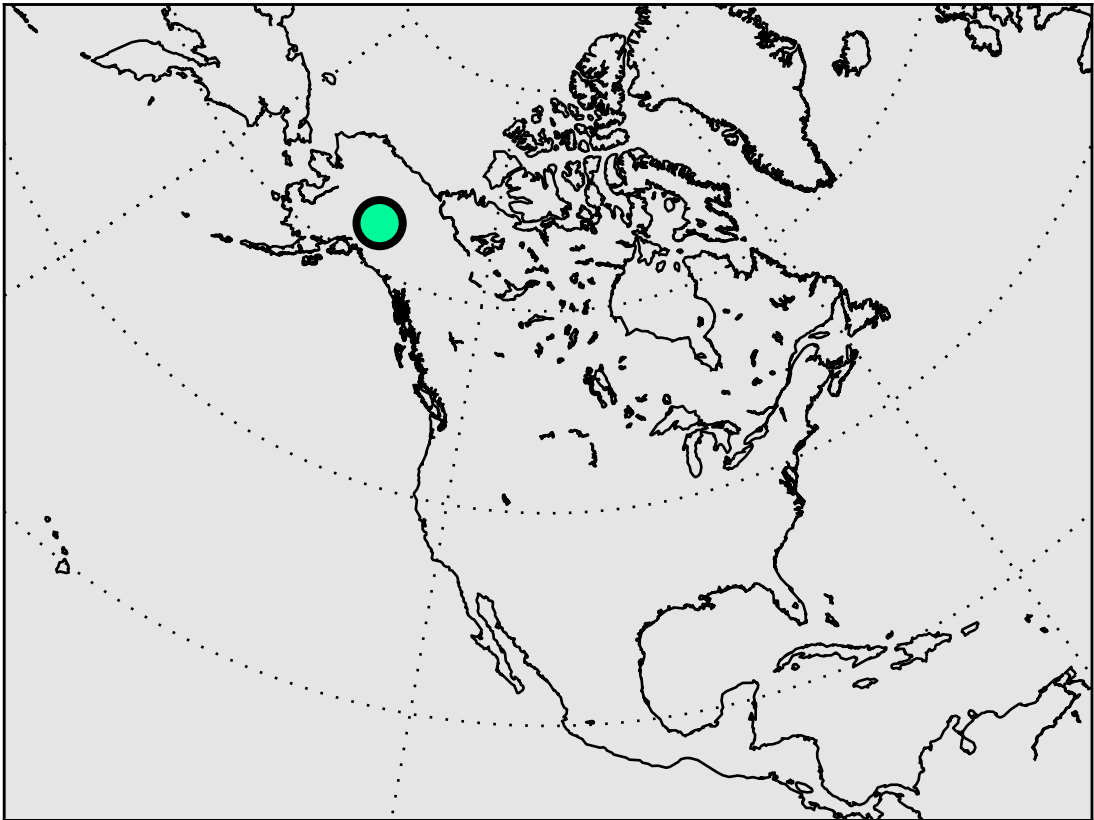

|                    |                                                                    |
|--------------------|--------------------------------------------------------------------|
| Dataset name:      | Quartz.Wooller.2012                                                |
| Archive type:      | LakeSediment                                                       |
| Proxy type:        | chironomid                                                         |
| Variable name:     | temperature                                                        |
| Latitude ( ° N):   | 64.206                                                             |
| Longitude ( ° E):  | -145.814                                                           |
| Elevation (m):     | 293.0                                                              |
| Interp. variable:  | T                                                                  |
| Interp. detail:    | air@surface                                                        |
| Interp. season:    | summerOnly                                                         |
| Interp. direction: | positive                                                           |
| Pub. 1 title:      | An \textbackslashtextbackslashtextbackslashtextasciitilde11,200... |
| Pub. 1 authors:    | Wooller, Matthew J.; Kurek, Joshua; Gaglioti, Benj...              |
| Pub. 1 year:       | 2012                                                               |
| Pub. 1 DOI:        | 10.1007/s10933-012-9610-9                                          |
| Original data URL: | www.ncdc.noaa.gov/paleo/study/15444                                |

Proxy data and metadata  
**LakeSediment | chironomid | Hudson.Clegg.2011 | PYTI3HL2Q73**

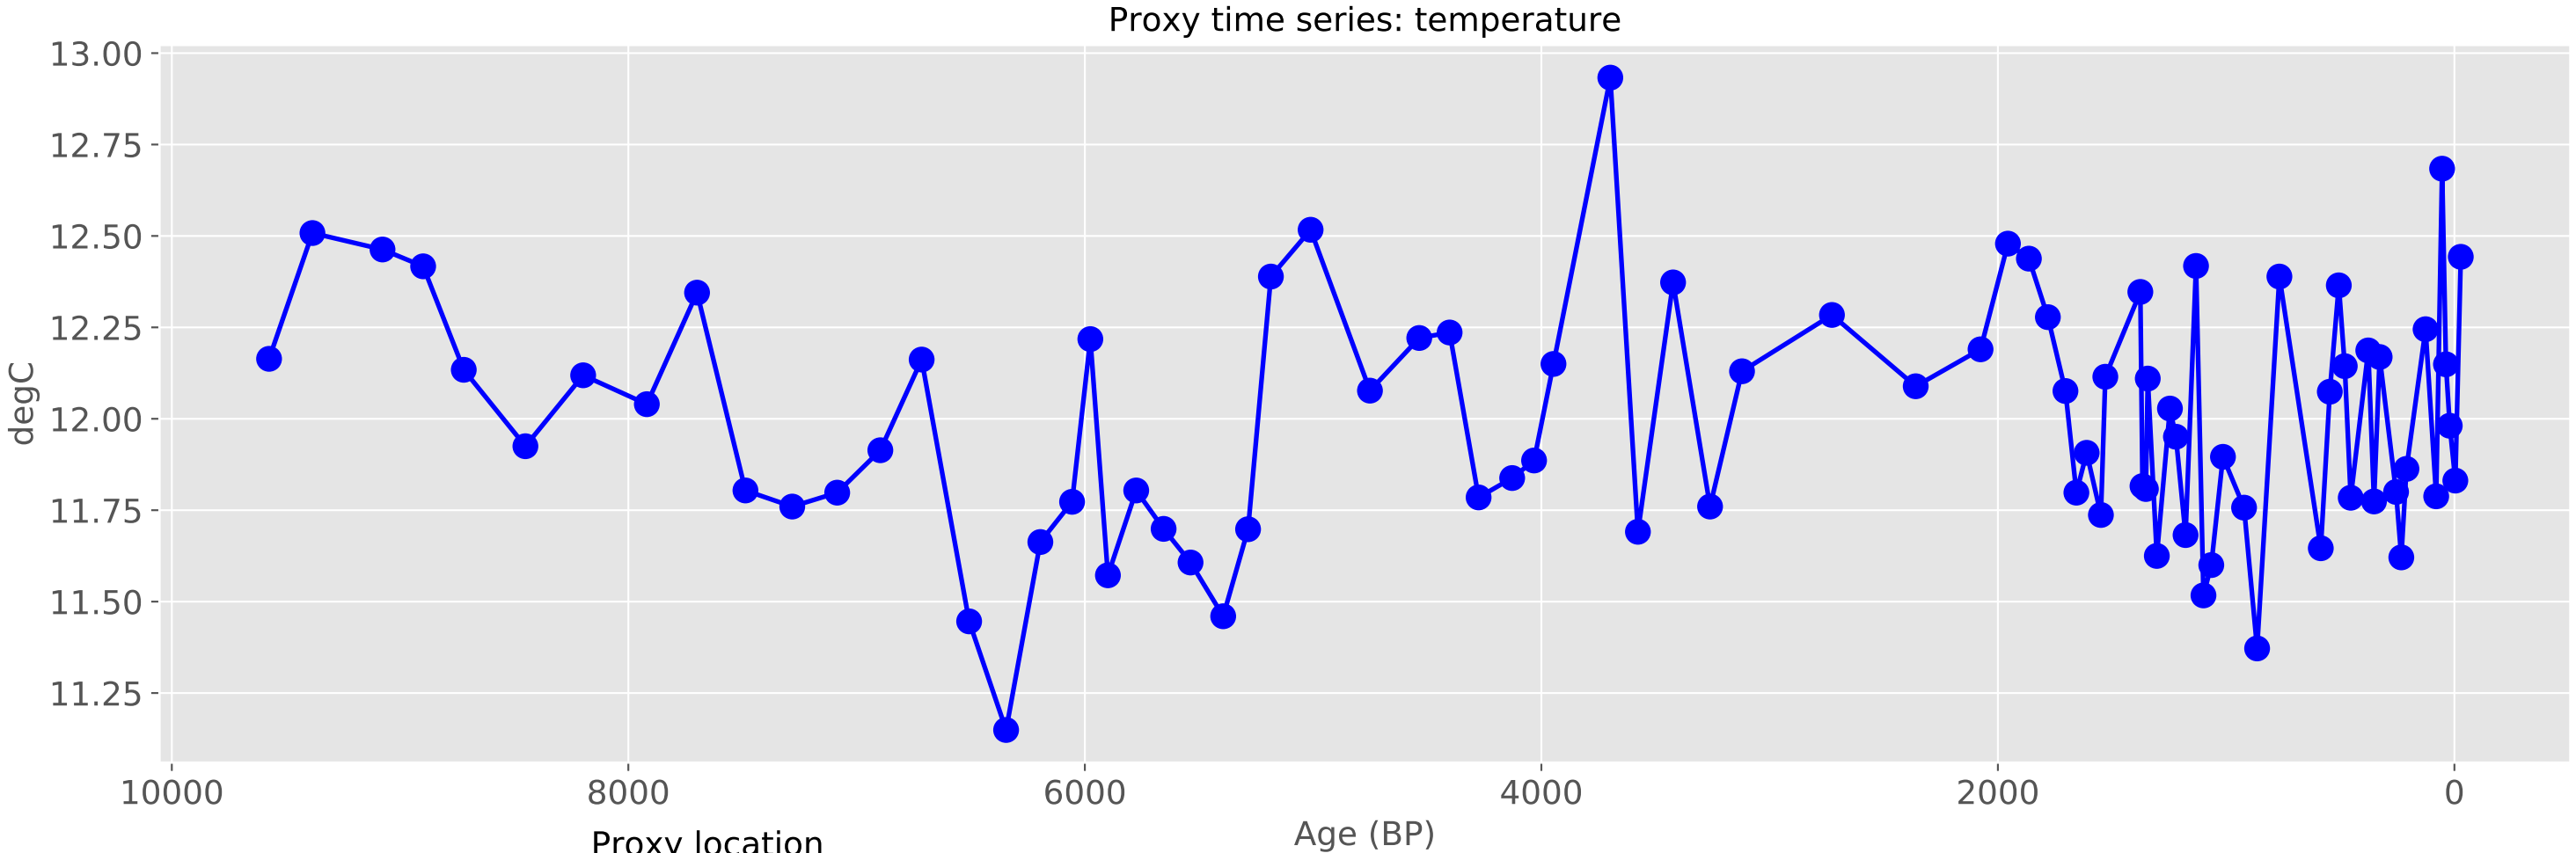

Proxy location  
(61.90 ° N, 145.67 ° W)

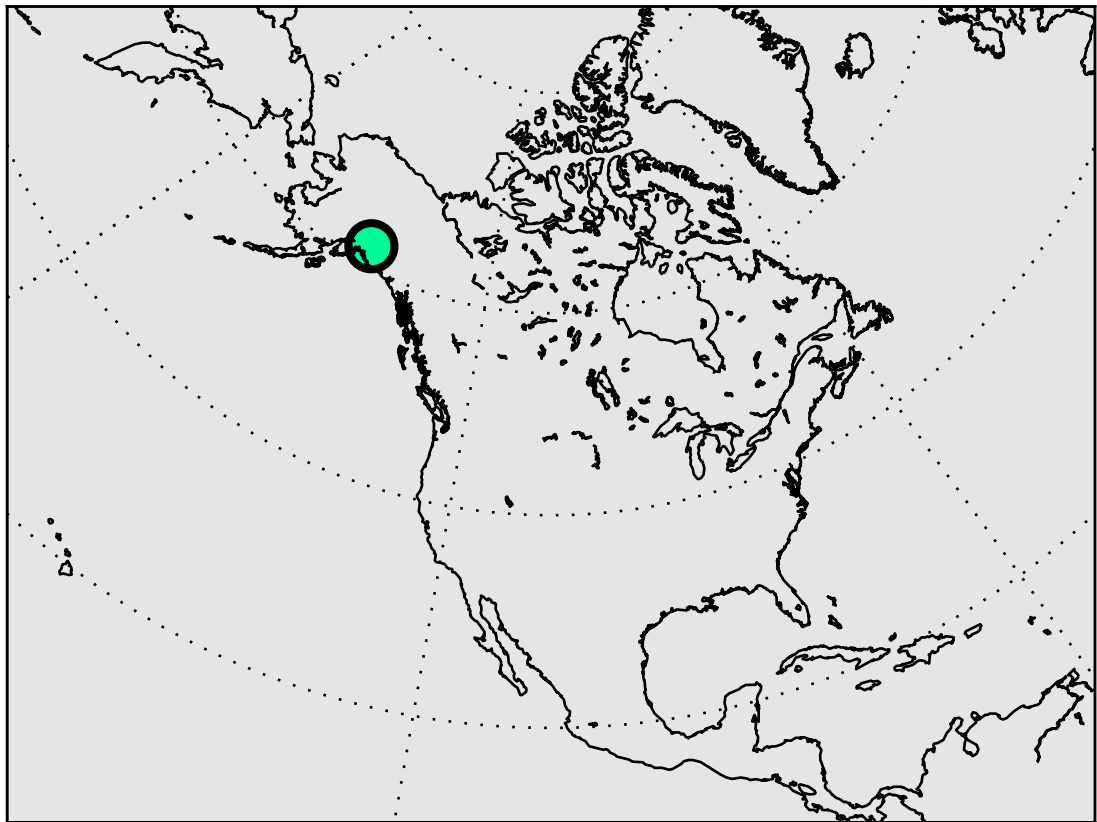

|                    |                                                                                              |
|--------------------|----------------------------------------------------------------------------------------------|
| Dataset name:      | Hudson.Clegg.2011                                                                            |
| Archive type:      | LakeSediment                                                                                 |
| Proxy type:        | chironomid                                                                                   |
| Variable name:     | temperature                                                                                  |
| Latitude ( ° N):   | 61.9                                                                                         |
| Longitude ( ° E):  | -145.6667                                                                                    |
| Elevation (m):     | 657.0                                                                                        |
| Interp. variable:  | T                                                                                            |
| Interp. detail:    | air@surface                                                                                  |
| Interp. season:    | summerOnly                                                                                   |
| Interp. direction: | positive                                                                                     |
| Pub. 1 title:      | Nonlinear response of summer temperature to Holocene                                         |
| Pub. 1 authors:    | Clegg, B. F.; Kelly, R.; Clarke, G. H.; Walker, I....                                        |
| Pub. 1 year:       | 2011                                                                                         |
| Pub. 1 DOI:        | 10.1073/pnas.1110913108                                                                      |
| Original data URL: | <a href="http://www.ncdc.noaa.gov/paleo/study/15444">www.ncdc.noaa.gov/paleo/study/15444</a> |



Proxy data and metadata  
LakeSediment | chironomid | MooseLake.Clegg.2010 | RHLePxbL9rl

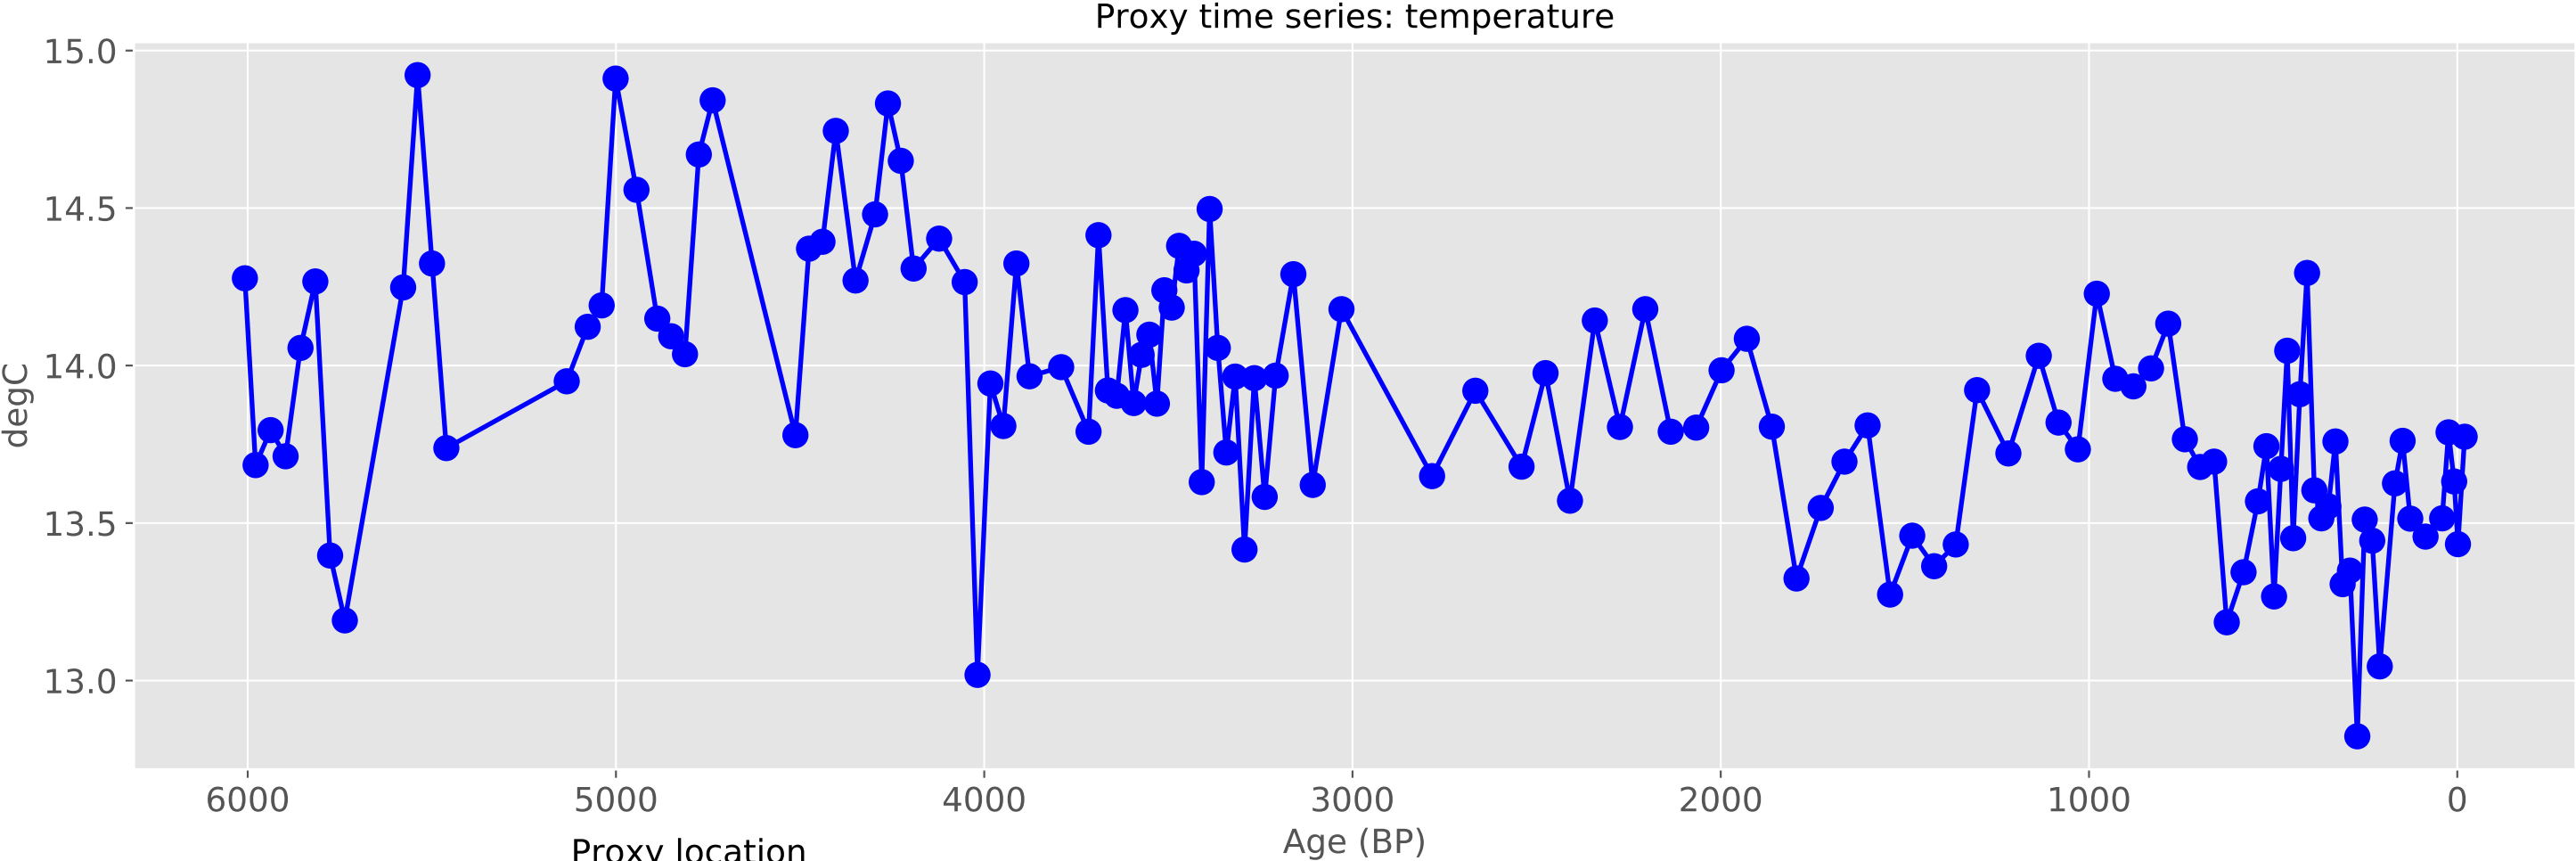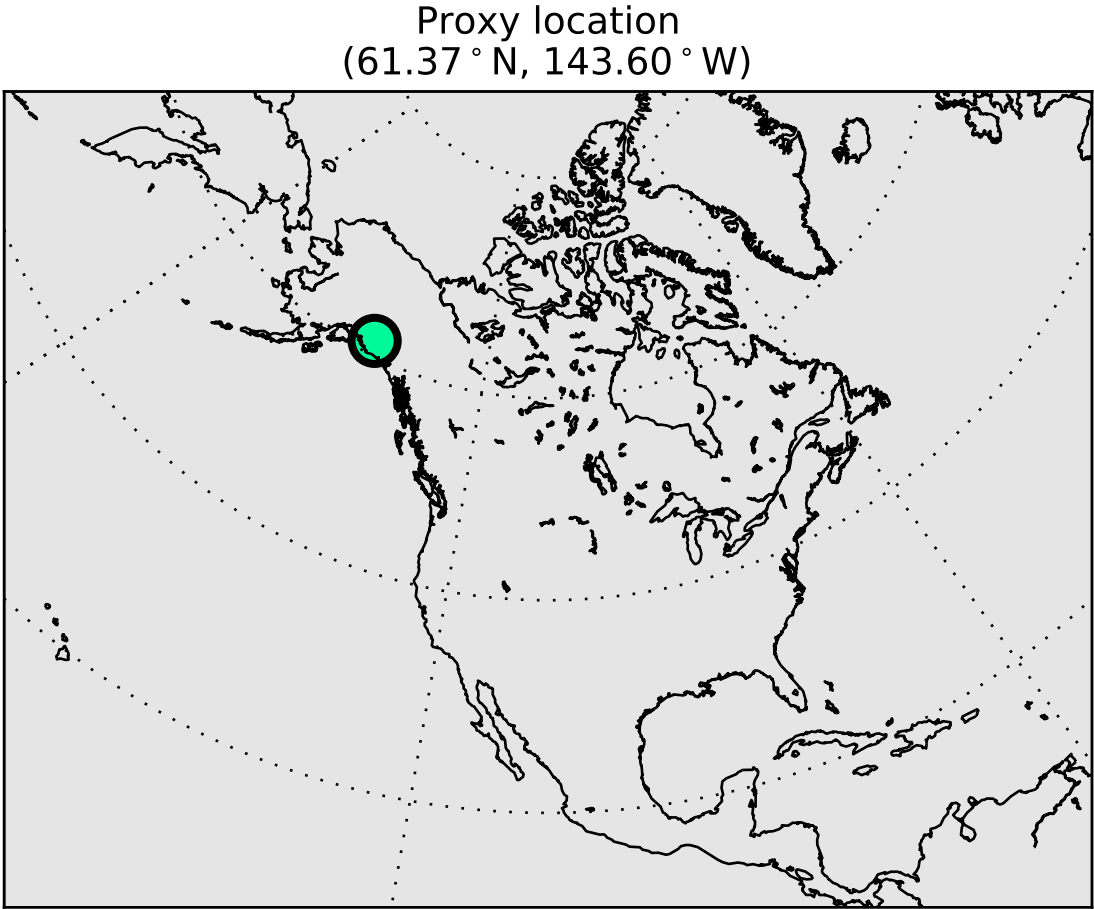

|                    |                                                       |
|--------------------|-------------------------------------------------------|
| Dataset name:      | MooseLake.Clegg.2010                                  |
| Archive type:      | LakeSediment                                          |
| Proxy type:        | chironomid                                            |
| Variable name:     | temperature                                           |
| Latitude ( ° N):   | 61.3742                                               |
| Longitude ( ° E):  | -143.5988                                             |
| Elevation (m):     | 437.0                                                 |
| Interp. variable:  | T                                                     |
| Interp. detail:    | air@surface                                           |
| Interp. season:    | summerOnly                                            |
| Interp. direction: | positive                                              |
| Pub. 1 title:      | Six millennia of summer temperature variation base... |
| Pub. 1 authors:    | Clegg, Benjamin F.; Clarke, Gina H.; Chipman, Meli... |
| Pub. 1 year:       | 2010                                                  |
| Pub. 1 DOI:        | 10.1016/j.quascirev.2010.08.001                       |
| Original data URL: | www.ncdc.noaa.gov/paleo/study/15444                   |

Proxy data and metadata  
LakeSediment | chironomid | rainbow.Clegg.2011 | PYTZOBOLJRG

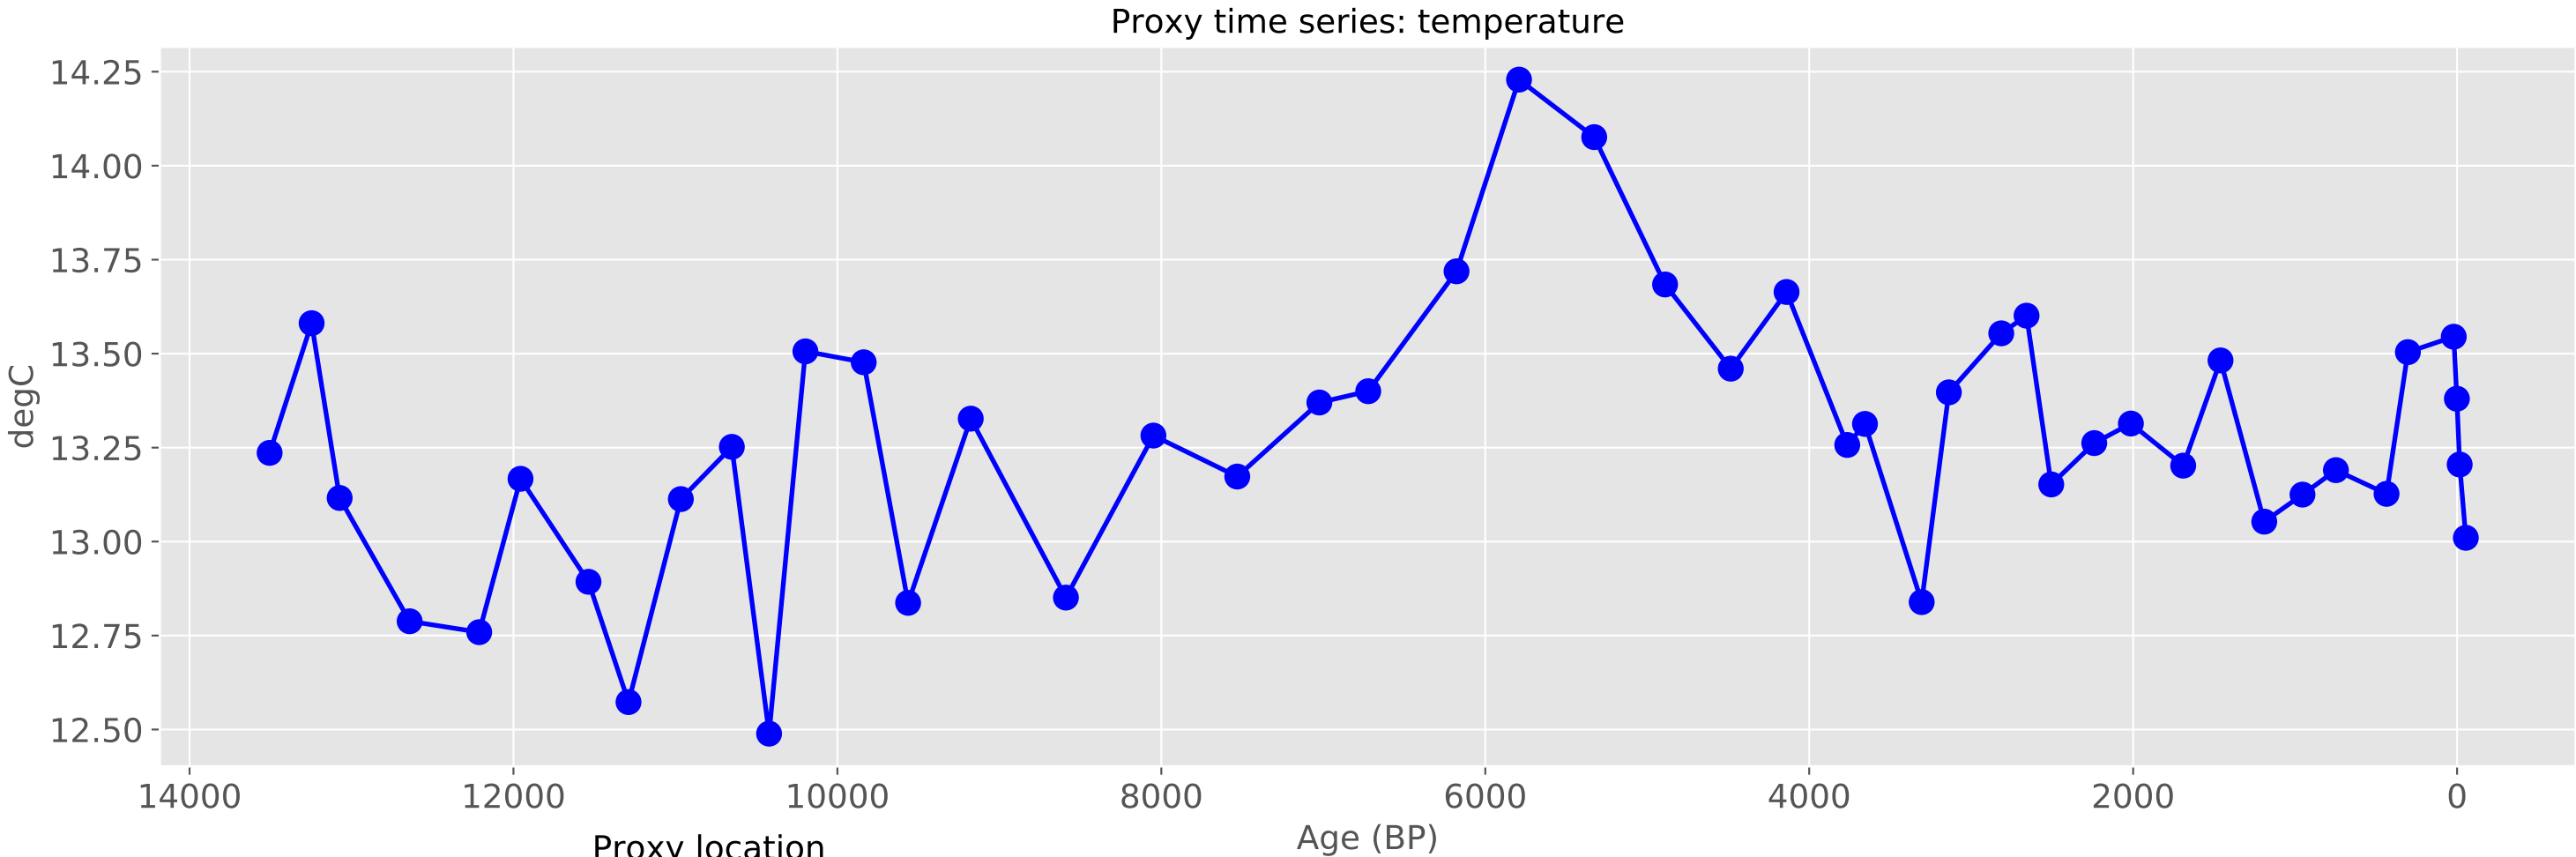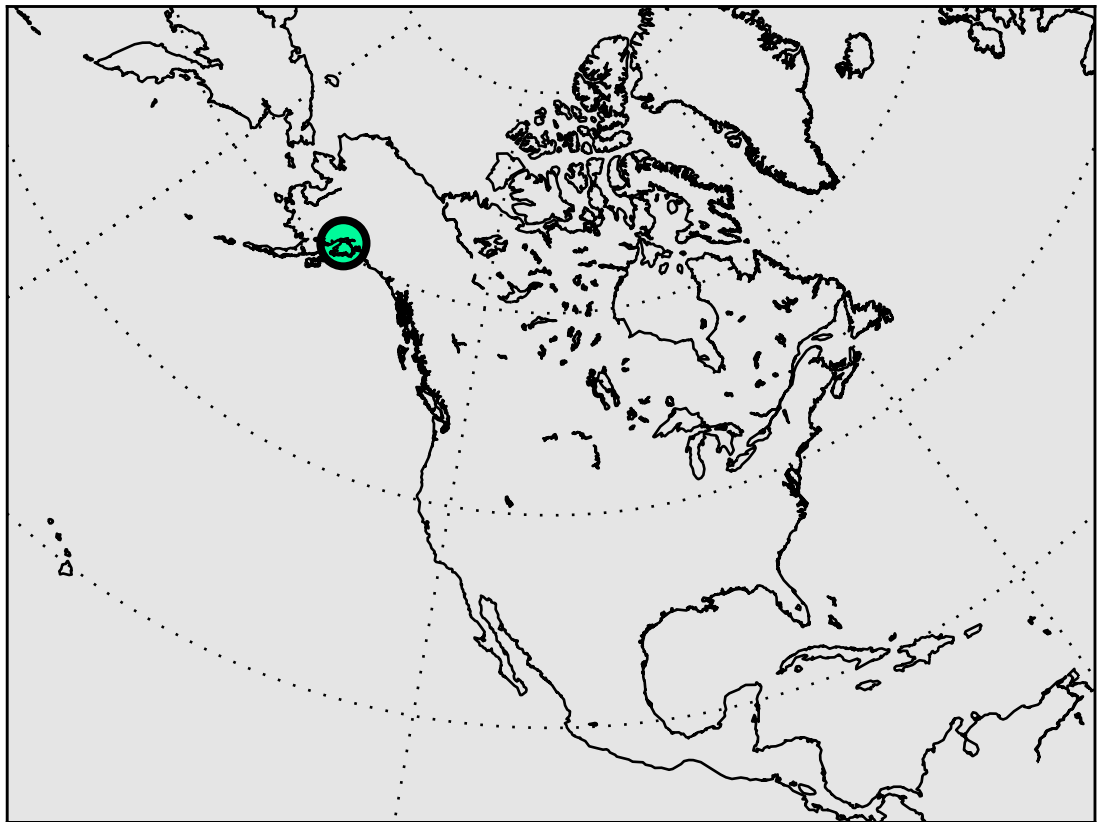

|                    |                                                       |
|--------------------|-------------------------------------------------------|
| Dataset name:      | rainbow.Clegg.2011                                    |
| Archive type:      | LakeSediment                                          |
| Proxy type:        | chironomid                                            |
| Variable name:     | temperature                                           |
| Latitude ( ° N):   | 60.7167                                               |
| Longitude ( ° E):  | -150.8                                                |
| Elevation (m):     | 63.0                                                  |
| Interp. variable:  | T                                                     |
| Interp. detail:    | air@surface                                           |
| Interp. season:    | summerOnly                                            |
| Interp. direction: | positive                                              |
| Pub. 1 title:      | Nonlinear response of summer temperature to Holocene  |
| Pub. 1 authors:    | Clegg, B. F.; Kelly, R.; Clarke, G. H.; Walker, I.... |
| Pub. 1 year:       | 2011                                                  |
| Pub. 1 DOI:        | 10.1073/pnas.1110913108                               |
| Original data URL: | www.ncdc.noaa.gov/paleo/study/15444                   |

Proxy data and metadata  
LakeSediment | chironomid | 3MPond.Pellatt.2000 | Rlf3YywN7Sz

Proxy time series: temperature

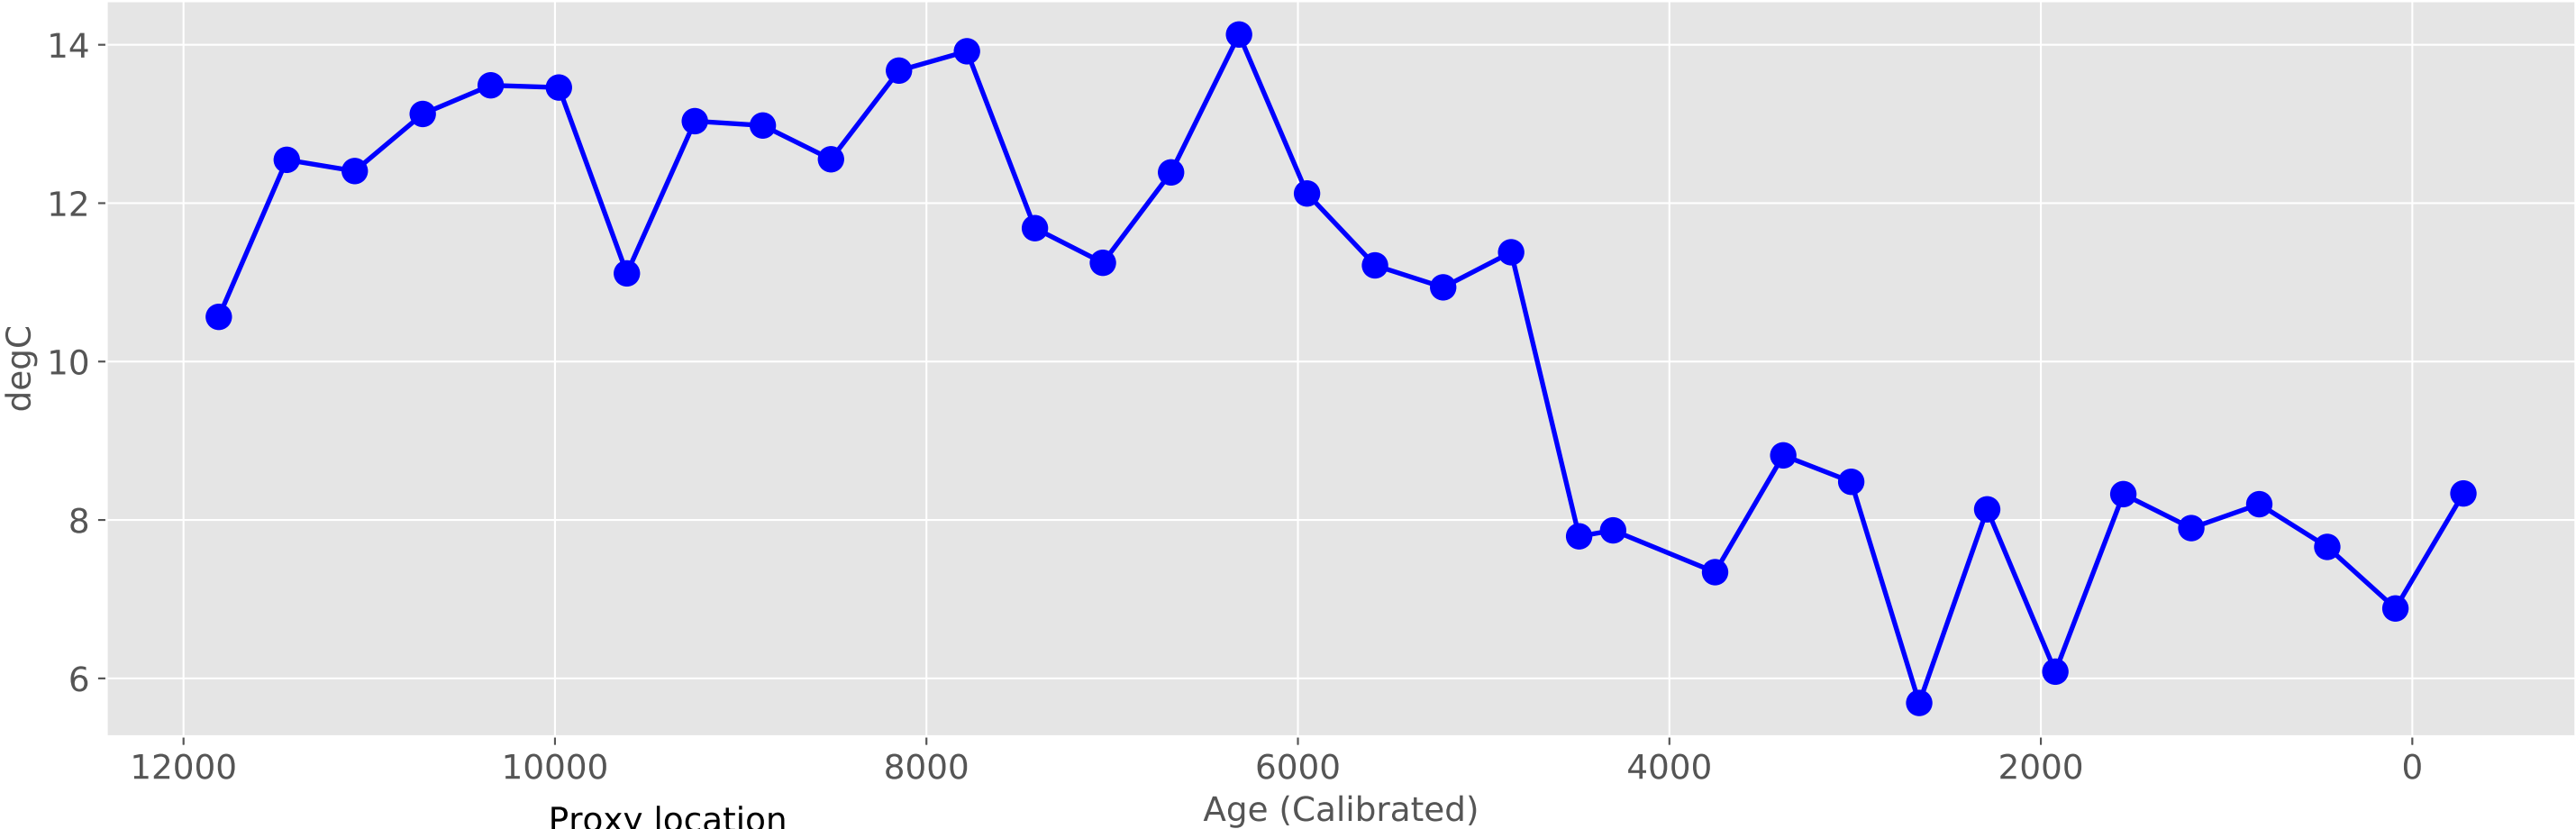

Proxy location  
(49.98 ° N, 121.22 ° W)

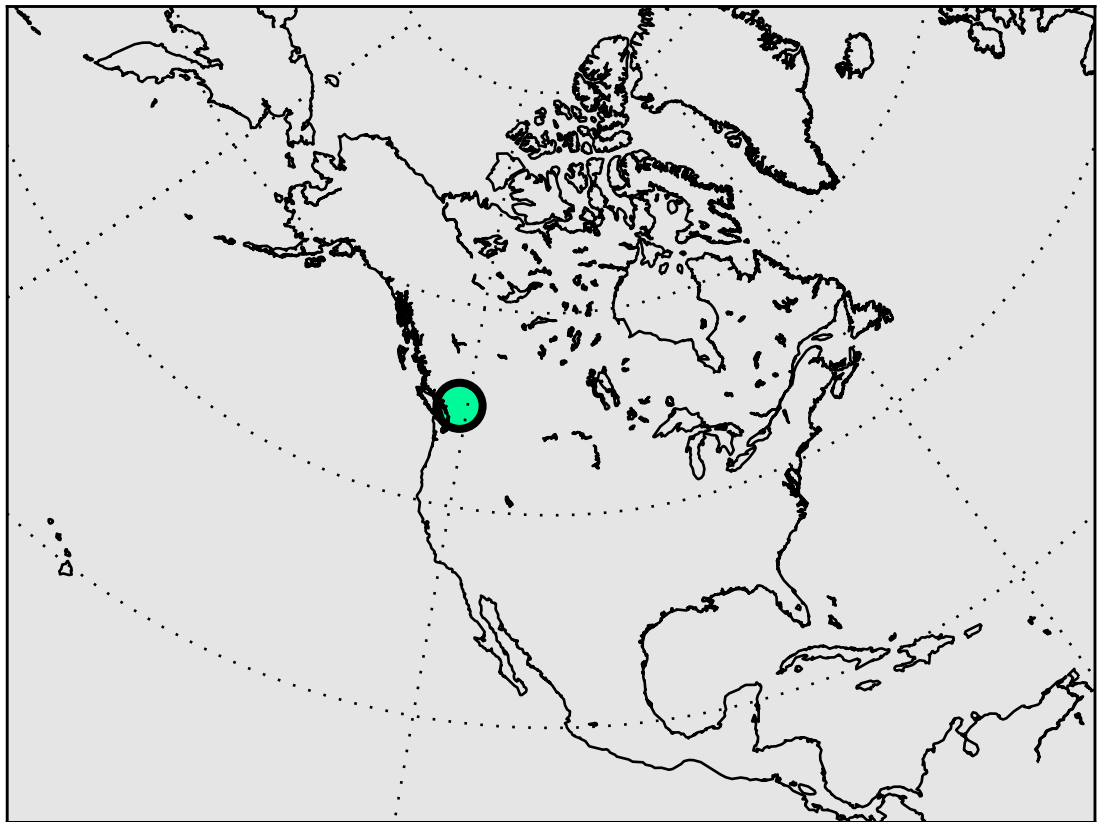

|                    |                                                       |
|--------------------|-------------------------------------------------------|
| Dataset name:      | 3MPond.Pellatt.2000                                   |
| Archive type:      | LakeSediment                                          |
| Proxy type:        | chironomid                                            |
| Variable name:     | temperature                                           |
| Latitude ( ° N):   | 49.9833                                               |
| Longitude ( ° E):  | -121.2167                                             |
| Elevation (m):     | 1950.0                                                |
| Interp. variable:  | T                                                     |
| Interp. detail:    | air@surface                                           |
| Interp. season:    | summerOnly                                            |
| Interp. direction: | positive                                              |
| Pub. 1 title:      | Holocene treeline and climate change in the subalp... |
| Pub. 1 authors:    | Pellatt, Marlow G.; Smith, Michael J.; Mathewes, R... |
| Pub. 1 year:       | 2000                                                  |
| Pub. 1 DOI:        | 10.1080/15230430.2000.12003341                        |
| Original data URL: | www.ncdc.noaa.gov/paleo/study/27330                   |

Proxy data and metadata  
LakeSediment | chironomid | Windy.Chase.2008 | WEBf35d2722

Proxy time series: temperature

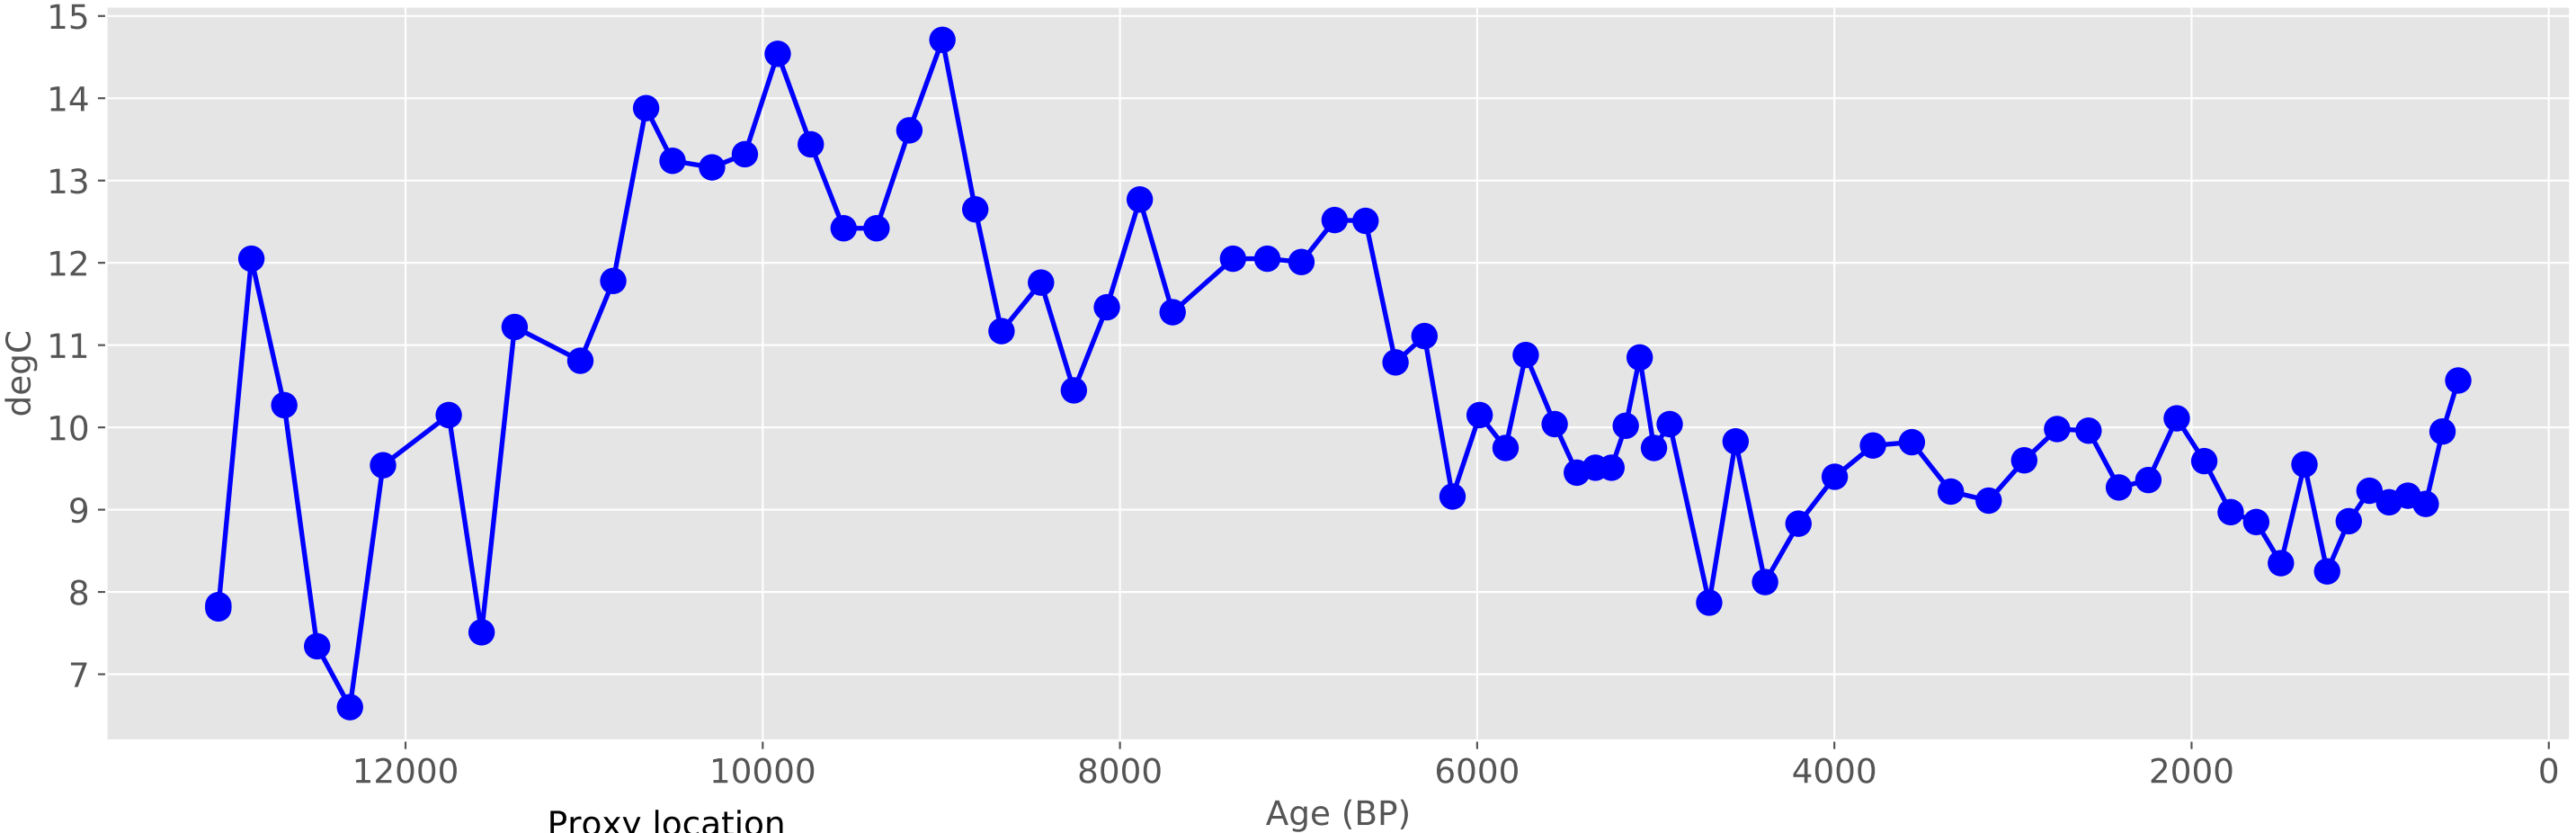

Proxy location  
(49.81 ° N, 117.88 ° W)

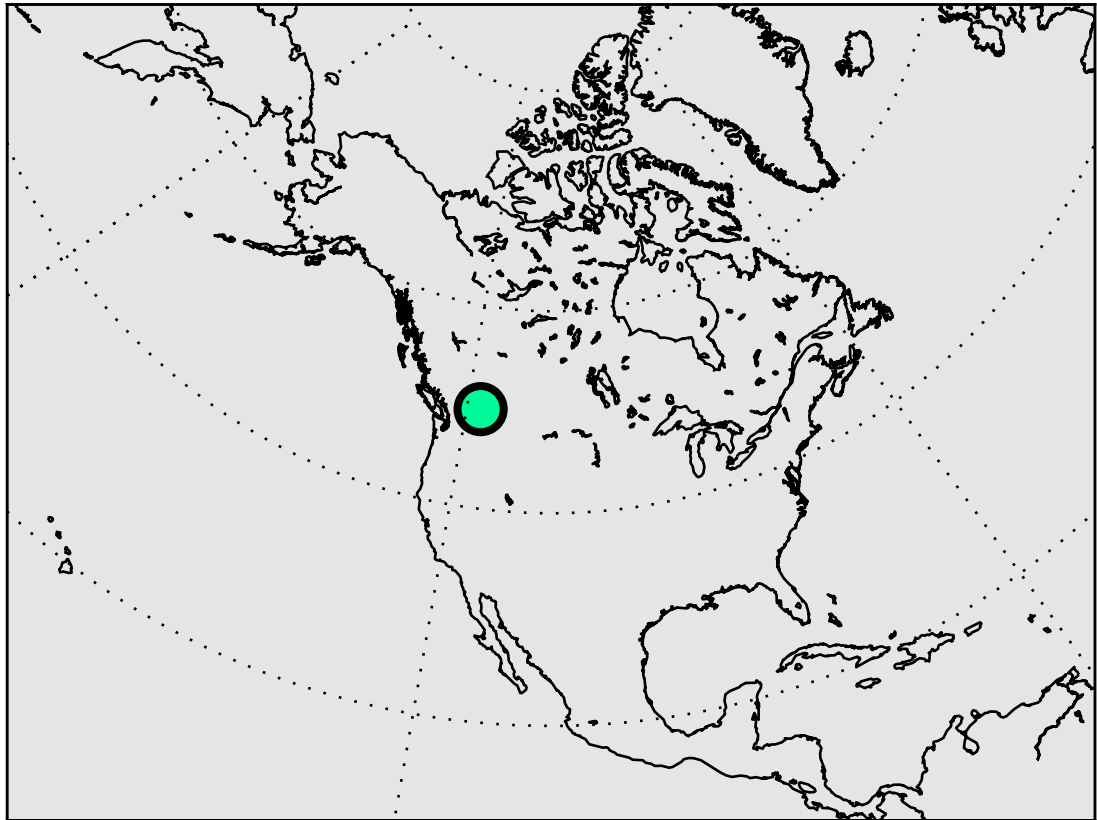

|                    |                                                       |
|--------------------|-------------------------------------------------------|
| Dataset name:      | Windy.Chase.2008                                      |
| Archive type:      | LakeSediment                                          |
| Proxy type:        | chironomid                                            |
| Variable name:     | temperature                                           |
| Latitude ( ° N):   | 49.8133                                               |
| Longitude ( ° E):  | -117.8772                                             |
| Elevation (m):     | 1814.0                                                |
| Interp. variable:  | T                                                     |
| Interp. detail:    | air@surface                                           |
| Interp. season:    | summerOnly                                            |
| Interp. direction: | positive                                              |
| Pub. 1 title:      | Midge-inferred Holocene summer temperatures in sou... |
| Pub. 1 authors:    | Chase, Marianne; Bleskie, Christina; Walker, Ian R... |
| Pub. 1 year:       | 2008                                                  |
| Pub. 1 DOI:        | 10.1016/j.palaeo.2007.10.020                          |
| Original data URL: | www.ncdc.noaa.gov/paleo/study/27330                   |

Proxy data and metadata  
LakeSediment | chironomid | Frozen.Rosenberg.2004 | WEBd6c4bf1f

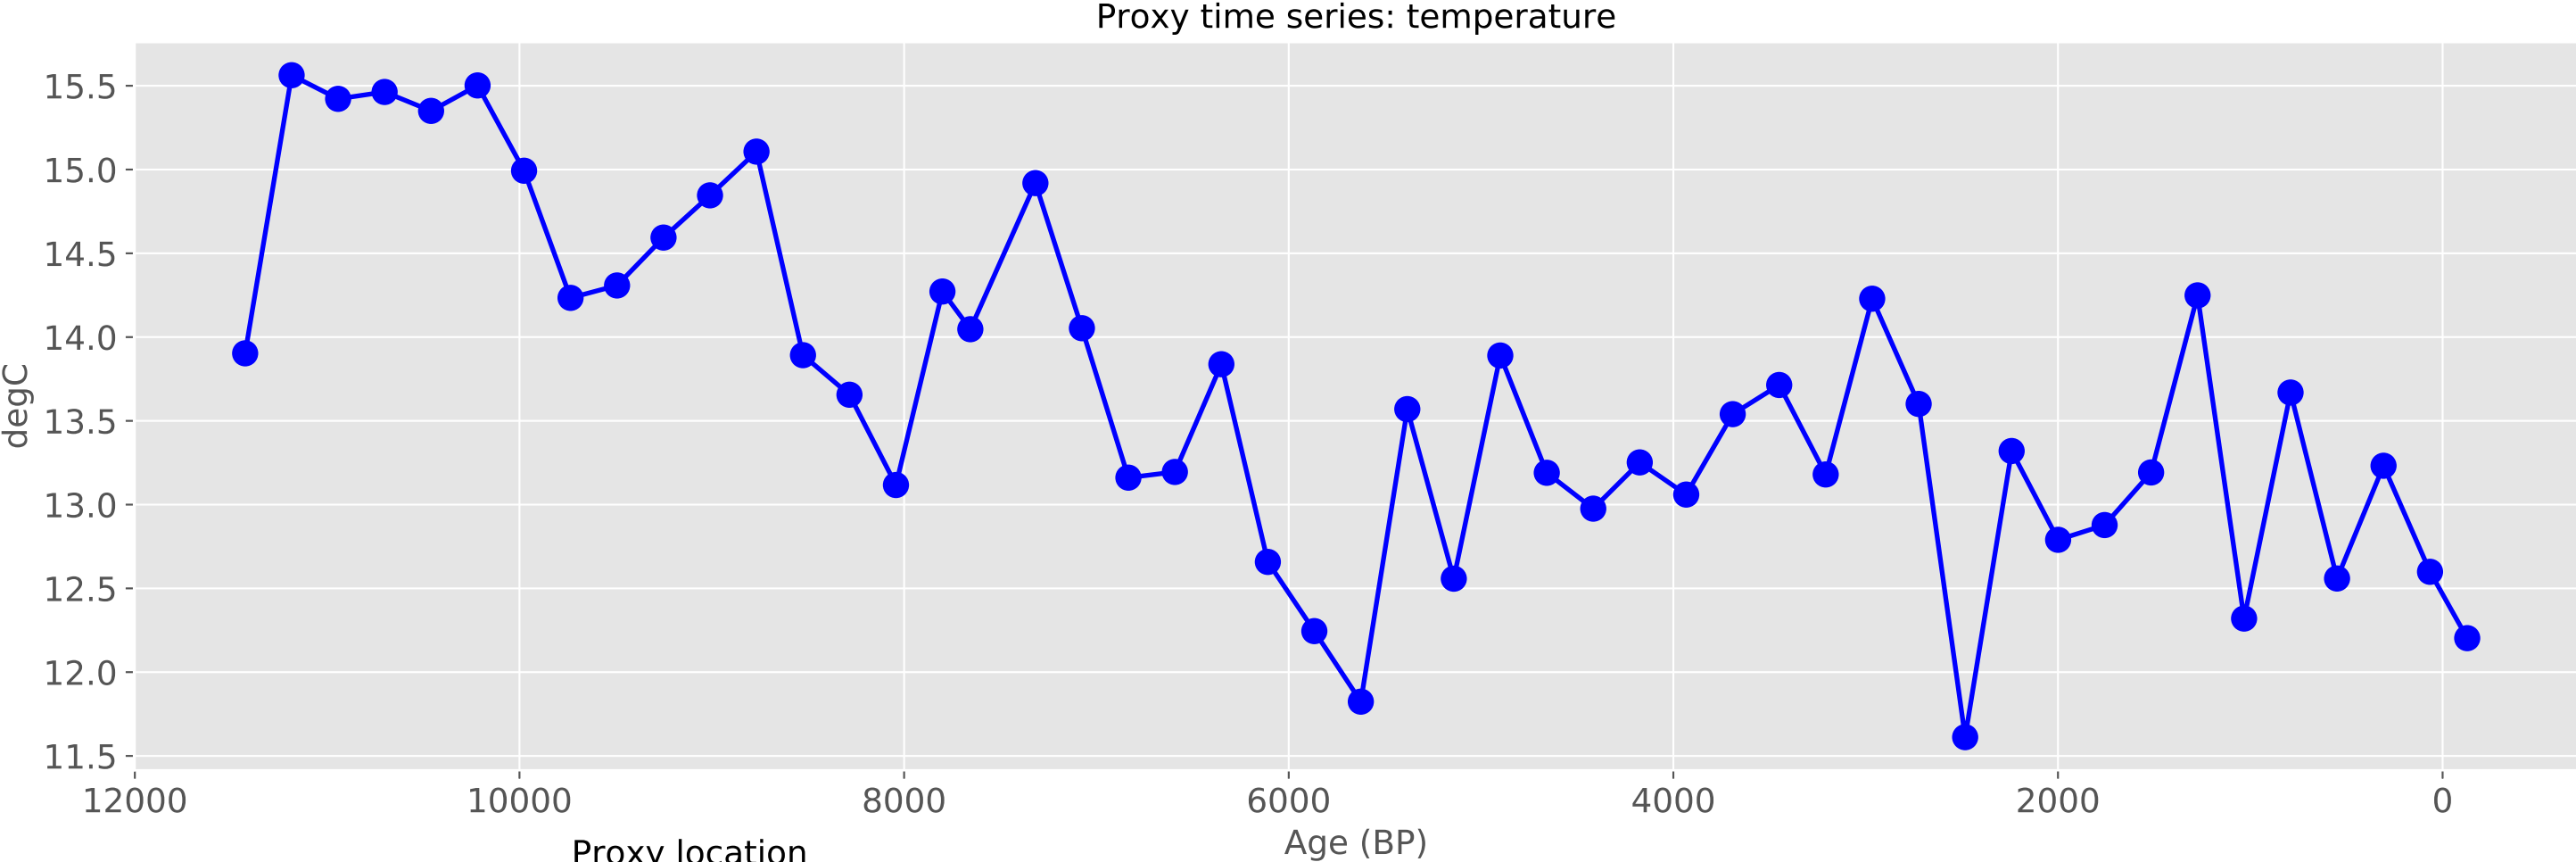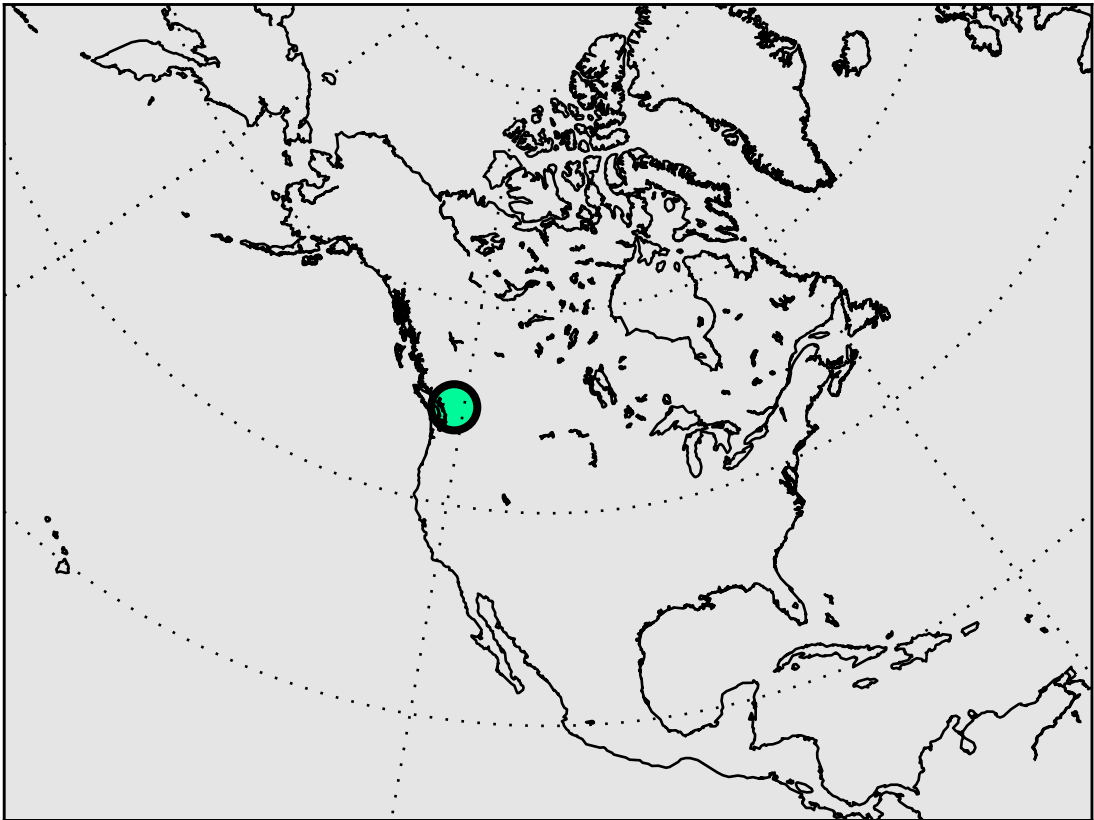

|                    |                                                       |
|--------------------|-------------------------------------------------------|
| Dataset name:      | Frozen.Rosenberg.2004                                 |
| Archive type:      | LakeSediment                                          |
| Proxy type:        | chironomid                                            |
| Variable name:     | temperature                                           |
| Latitude ( ° N):   | 49.6                                                  |
| Longitude ( ° E):  | -121.467                                              |
| Elevation (m):     | 1180.0                                                |
| Interp. variable:  | T                                                     |
| Interp. detail:    | air@surface                                           |
| Interp. season:    | summerOnly                                            |
| Interp. direction: | positive                                              |
| Pub. 1 title:      | Midge-inferred Holocene climate history of two sub... |
| Pub. 1 authors:    | Rosenberg, Sandra M.; Walker, Ian R.; Mathewes, Ro... |
| Pub. 1 year:       | 2004                                                  |
| Pub. 1 DOI:        | 10.1191/0959683604hl703rp                             |
| Original data URL: | www.ncdc.noaa.gov/paleo/study/27330                   |





Proxy data and metadata

LakeSediment | chironomid | LakeoftheWoods.Palmer.2002 | R05eeEJNPBo

Proxy time series: temperature

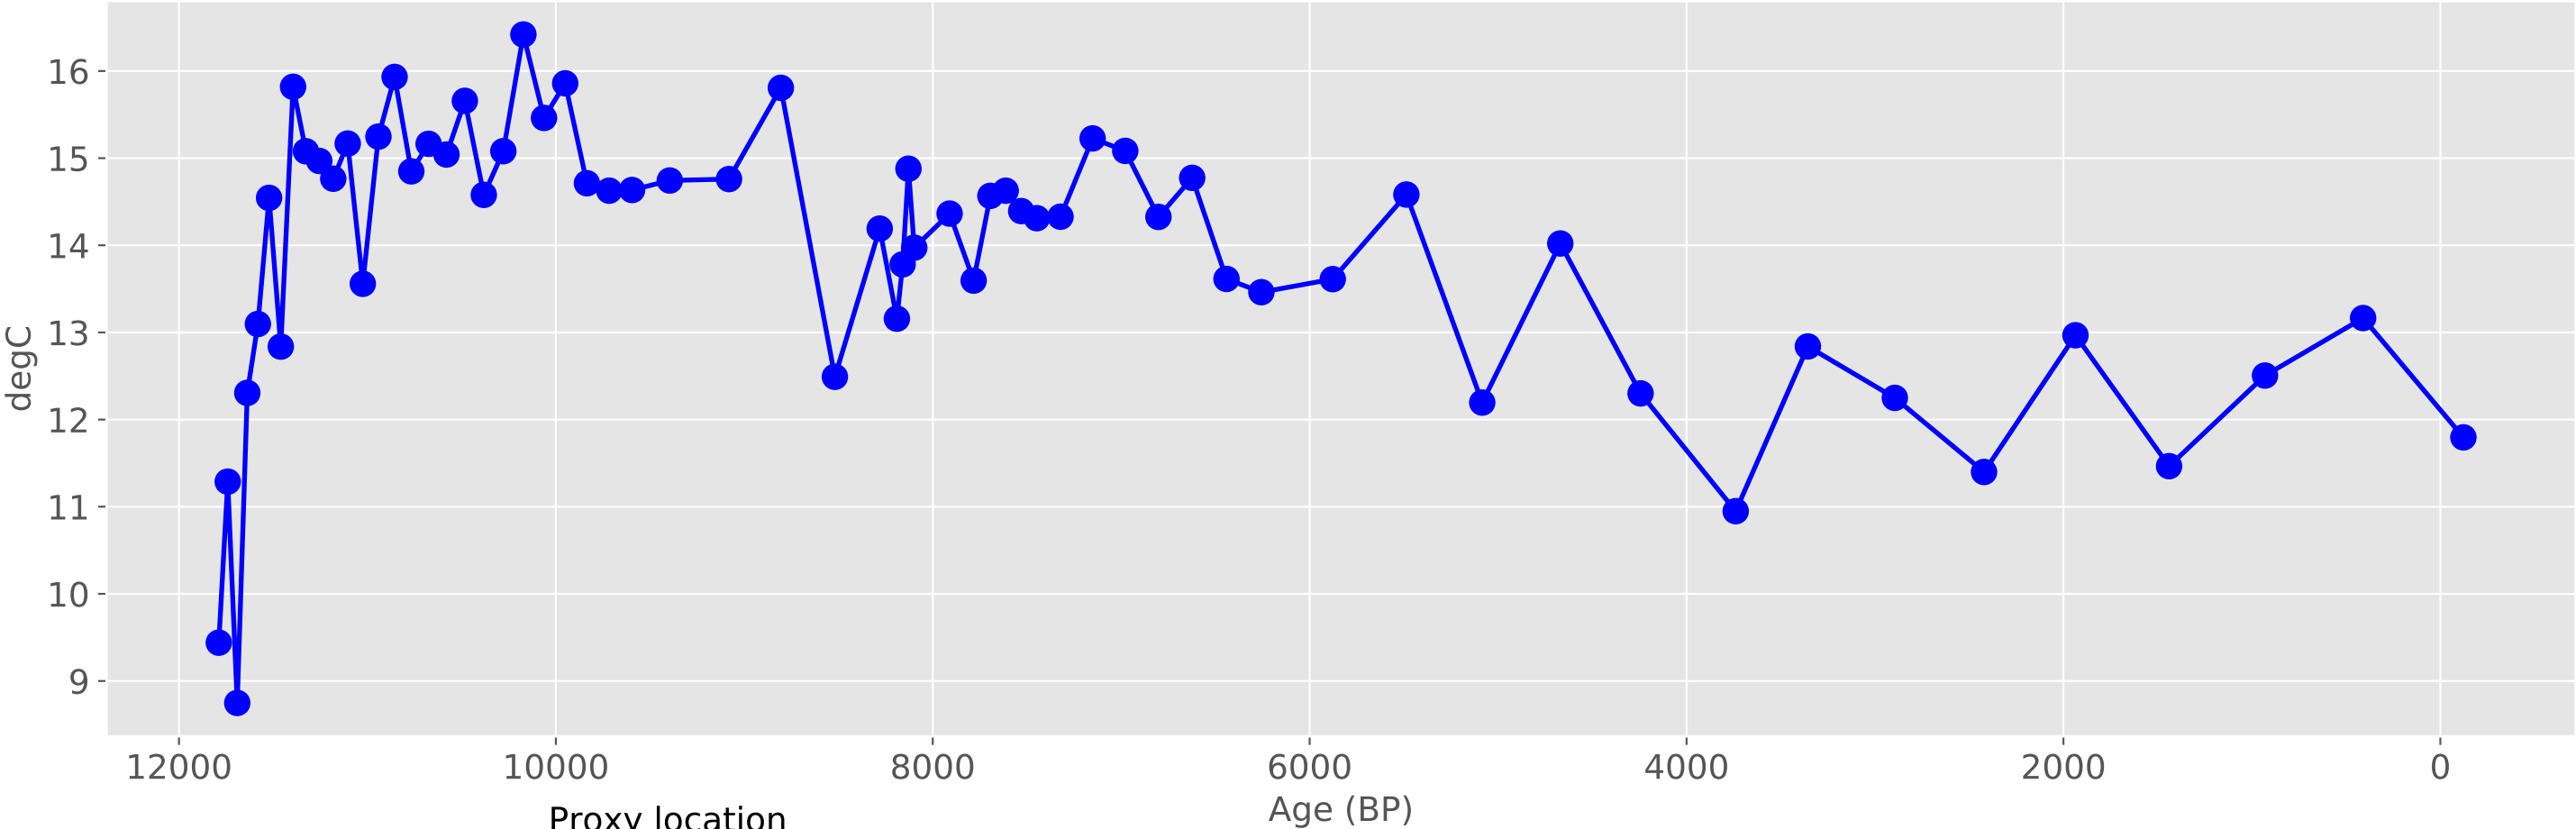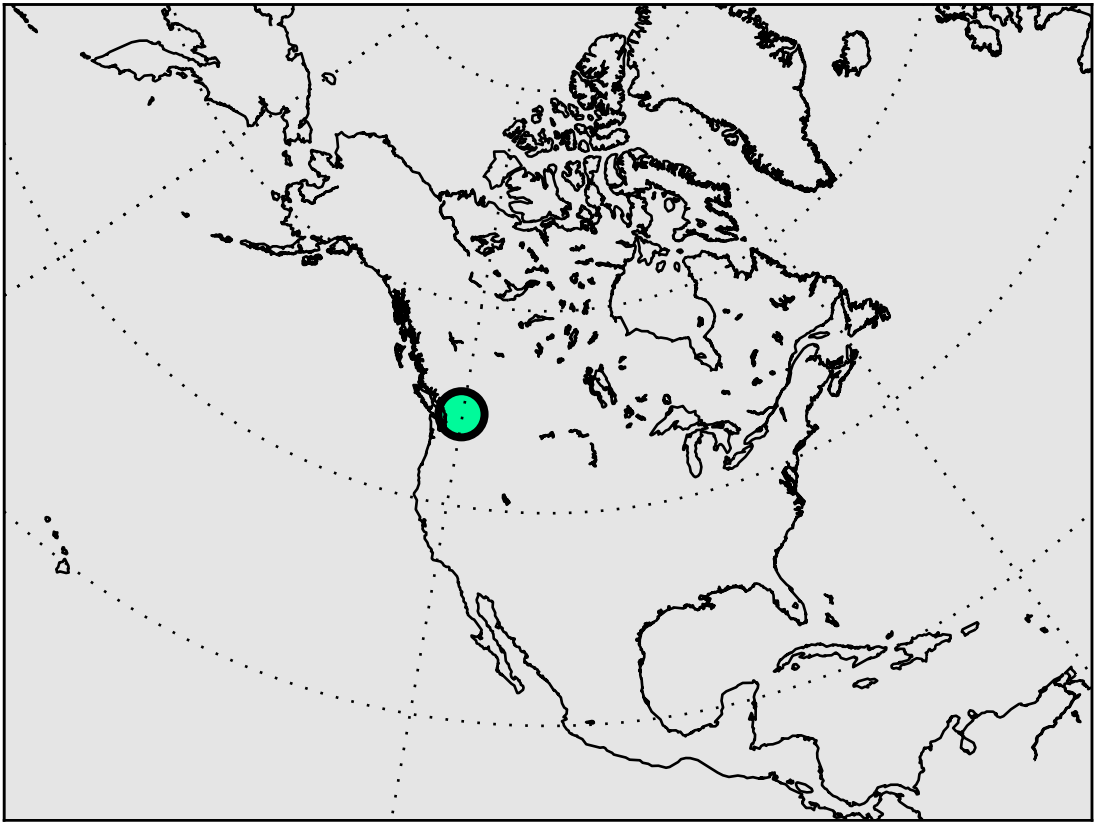

|                    |                                                                                              |
|--------------------|----------------------------------------------------------------------------------------------|
| Dataset name:      | LakeoftheWoods.Palmer.2002                                                                   |
| Archive type:      | LakeSediment                                                                                 |
| Proxy type:        | chironomid                                                                                   |
| Variable name:     | temperature                                                                                  |
| Latitude ( ° N):   | 49.05                                                                                        |
| Longitude ( ° E):  | -120.1833                                                                                    |
| Elevation (m):     | 2050.0                                                                                       |
| Interp. variable:  | T                                                                                            |
| Interp. detail:    | air@surface                                                                                  |
| Interp. season:    | summerOnly                                                                                   |
| Interp. direction: | positive                                                                                     |
| Pub. 1 title:      | Postglacial midge community change and Holocene pa...                                        |
| Pub. 1 authors:    | Palmer, Samantha; Walker, Ian; Heinrichs, Markus; ...                                        |
| Pub. 1 year:       | 2002                                                                                         |
| Pub. 1 DOI:        | 10.1023/A:1021644122727                                                                      |
| Original data URL: | <a href="http://www.ncdc.noaa.gov/paleo/study/27330">www.ncdc.noaa.gov/paleo/study/27330</a> |

Proxy data and metadata

LakeSediment | chironomid | LakeStowell.Lemmen.2018 | R6miF3Chdmb

Proxy time series: temperature

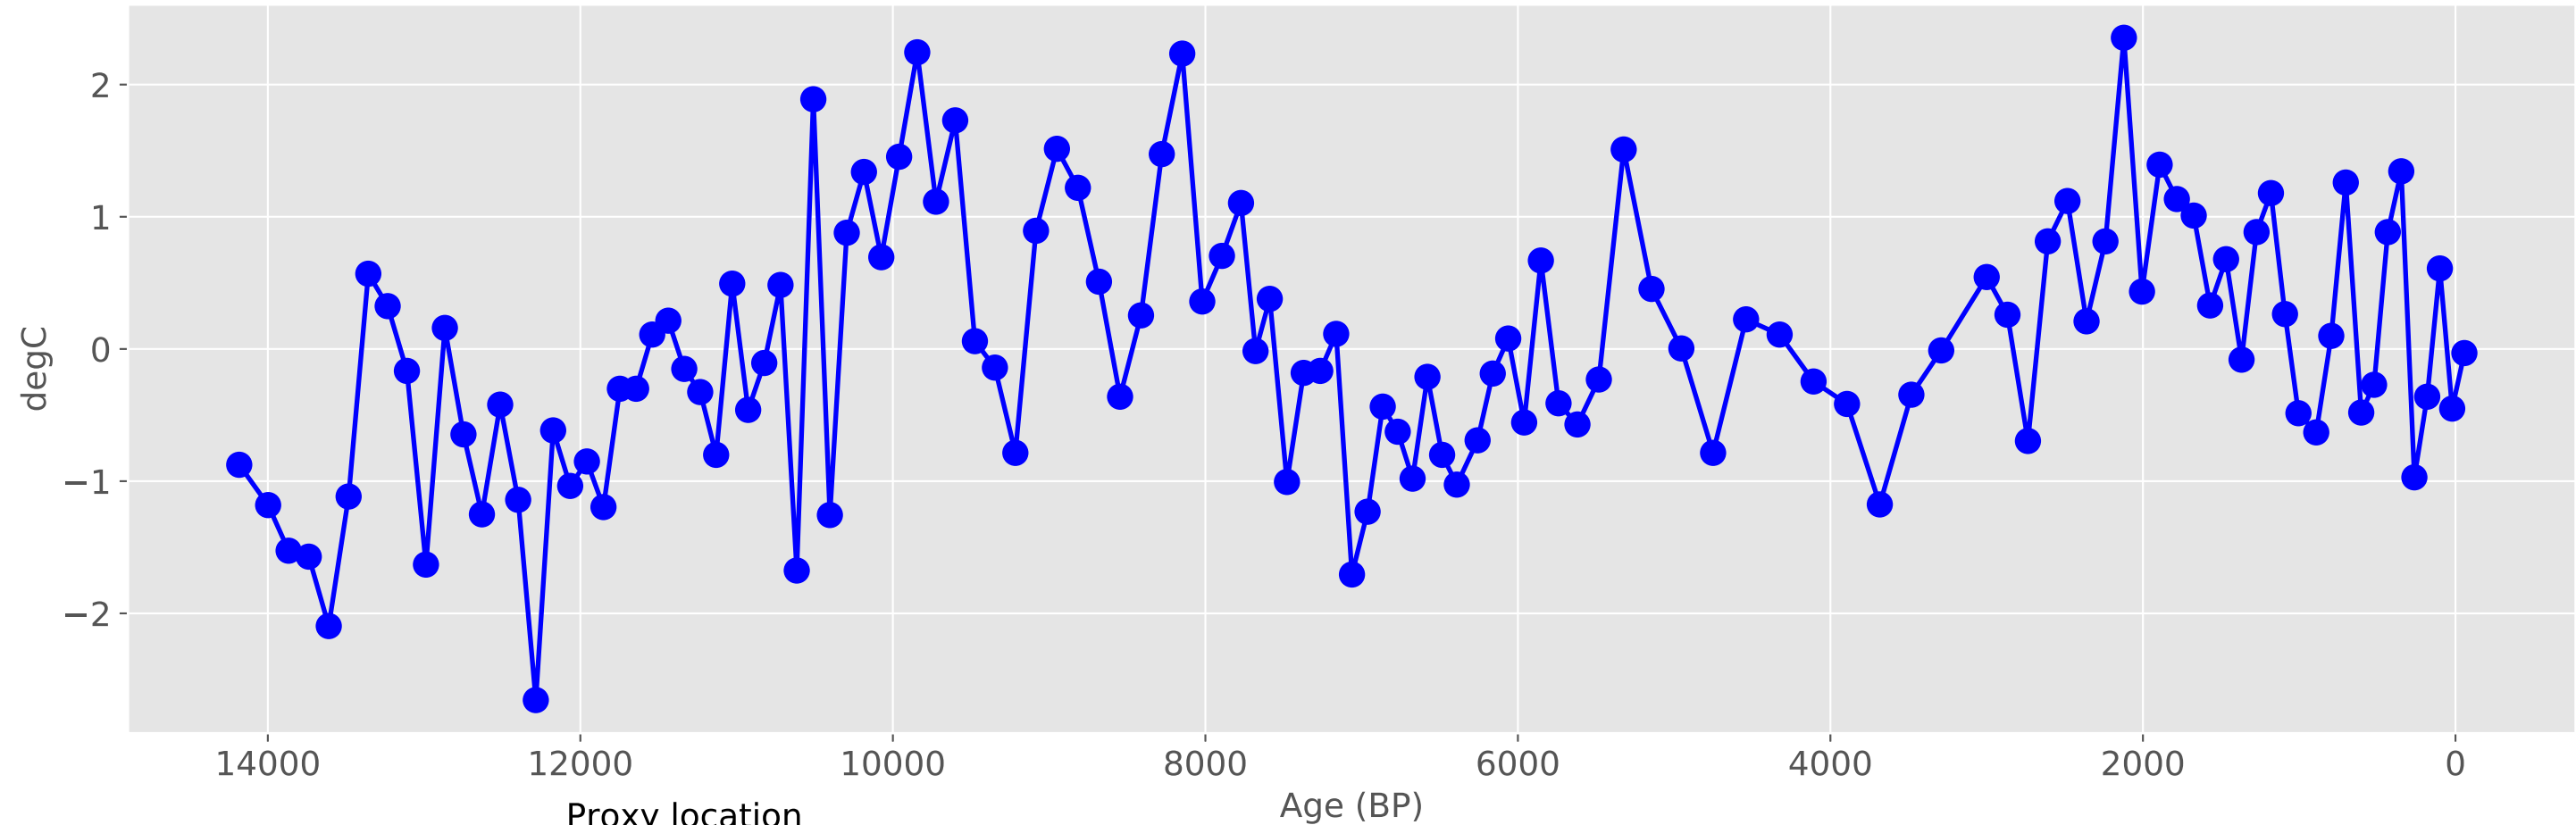

Proxy location  
(48.78 ° N, 123.44 ° W)

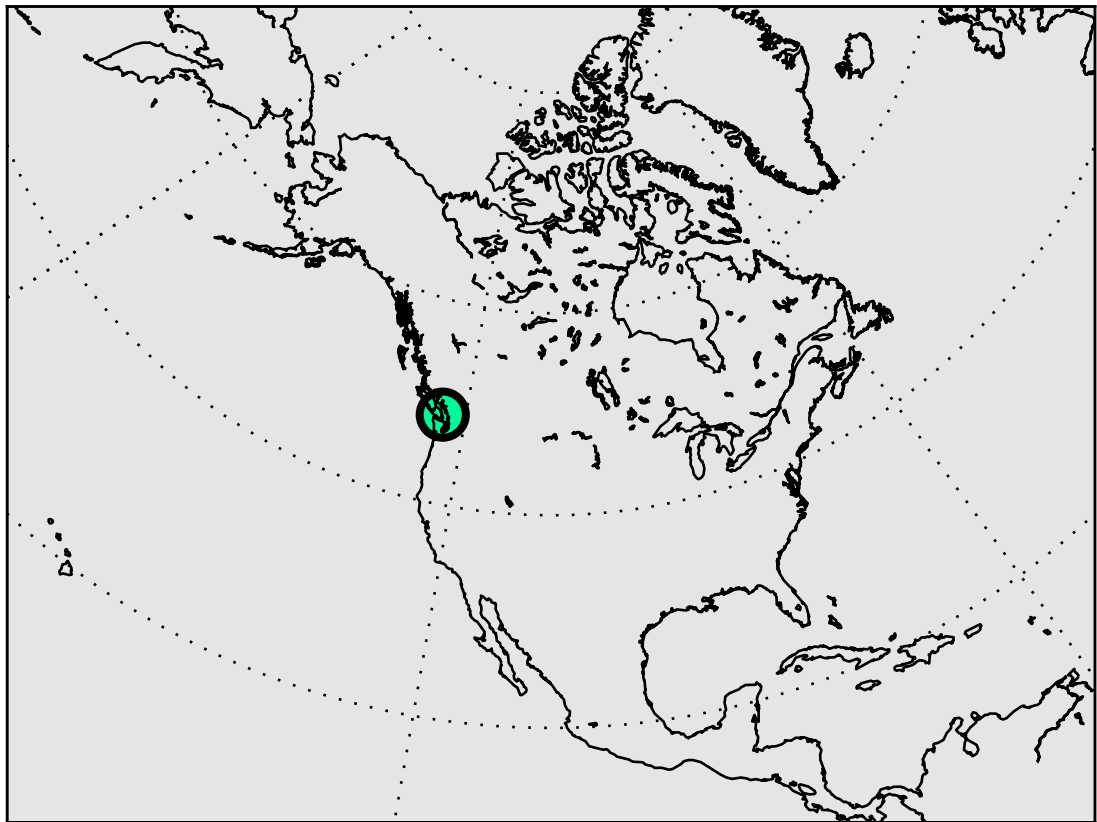

|                    |                                                                                              |
|--------------------|----------------------------------------------------------------------------------------------|
| Dataset name:      | LakeStowell.Lemmen.2018                                                                      |
| Archive type:      | LakeSediment                                                                                 |
| Proxy type:        | chironomid                                                                                   |
| Variable name:     | temperature                                                                                  |
| Latitude ( ° N):   | 48.7833                                                                                      |
| Longitude ( ° E):  | -123.4445                                                                                    |
| Elevation (m):     | 70.0                                                                                         |
| Interp. variable:  | T                                                                                            |
| Interp. detail:    | air@surface                                                                                  |
| Interp. season:    | summerOnly                                                                                   |
| Interp. direction: | positive                                                                                     |
| Pub. 1 title:      | Fossil chironomid assemblages and inferred summer ...                                        |
| Pub. 1 authors:    | Lemmen, J.; Lacourse, T.                                                                     |
| Pub. 1 year:       | 2018                                                                                         |
| Pub. 1 DOI:        | 10.1007/s10933-017-9998-3                                                                    |
| Original data URL: | <a href="http://www.ncdc.noaa.gov/paleo/study/27330">www.ncdc.noaa.gov/paleo/study/27330</a> |

Proxy data and metadata

LakeSediment | chironomid | StellaLake.Reinemann.2009 | Ru90lq5Epgy

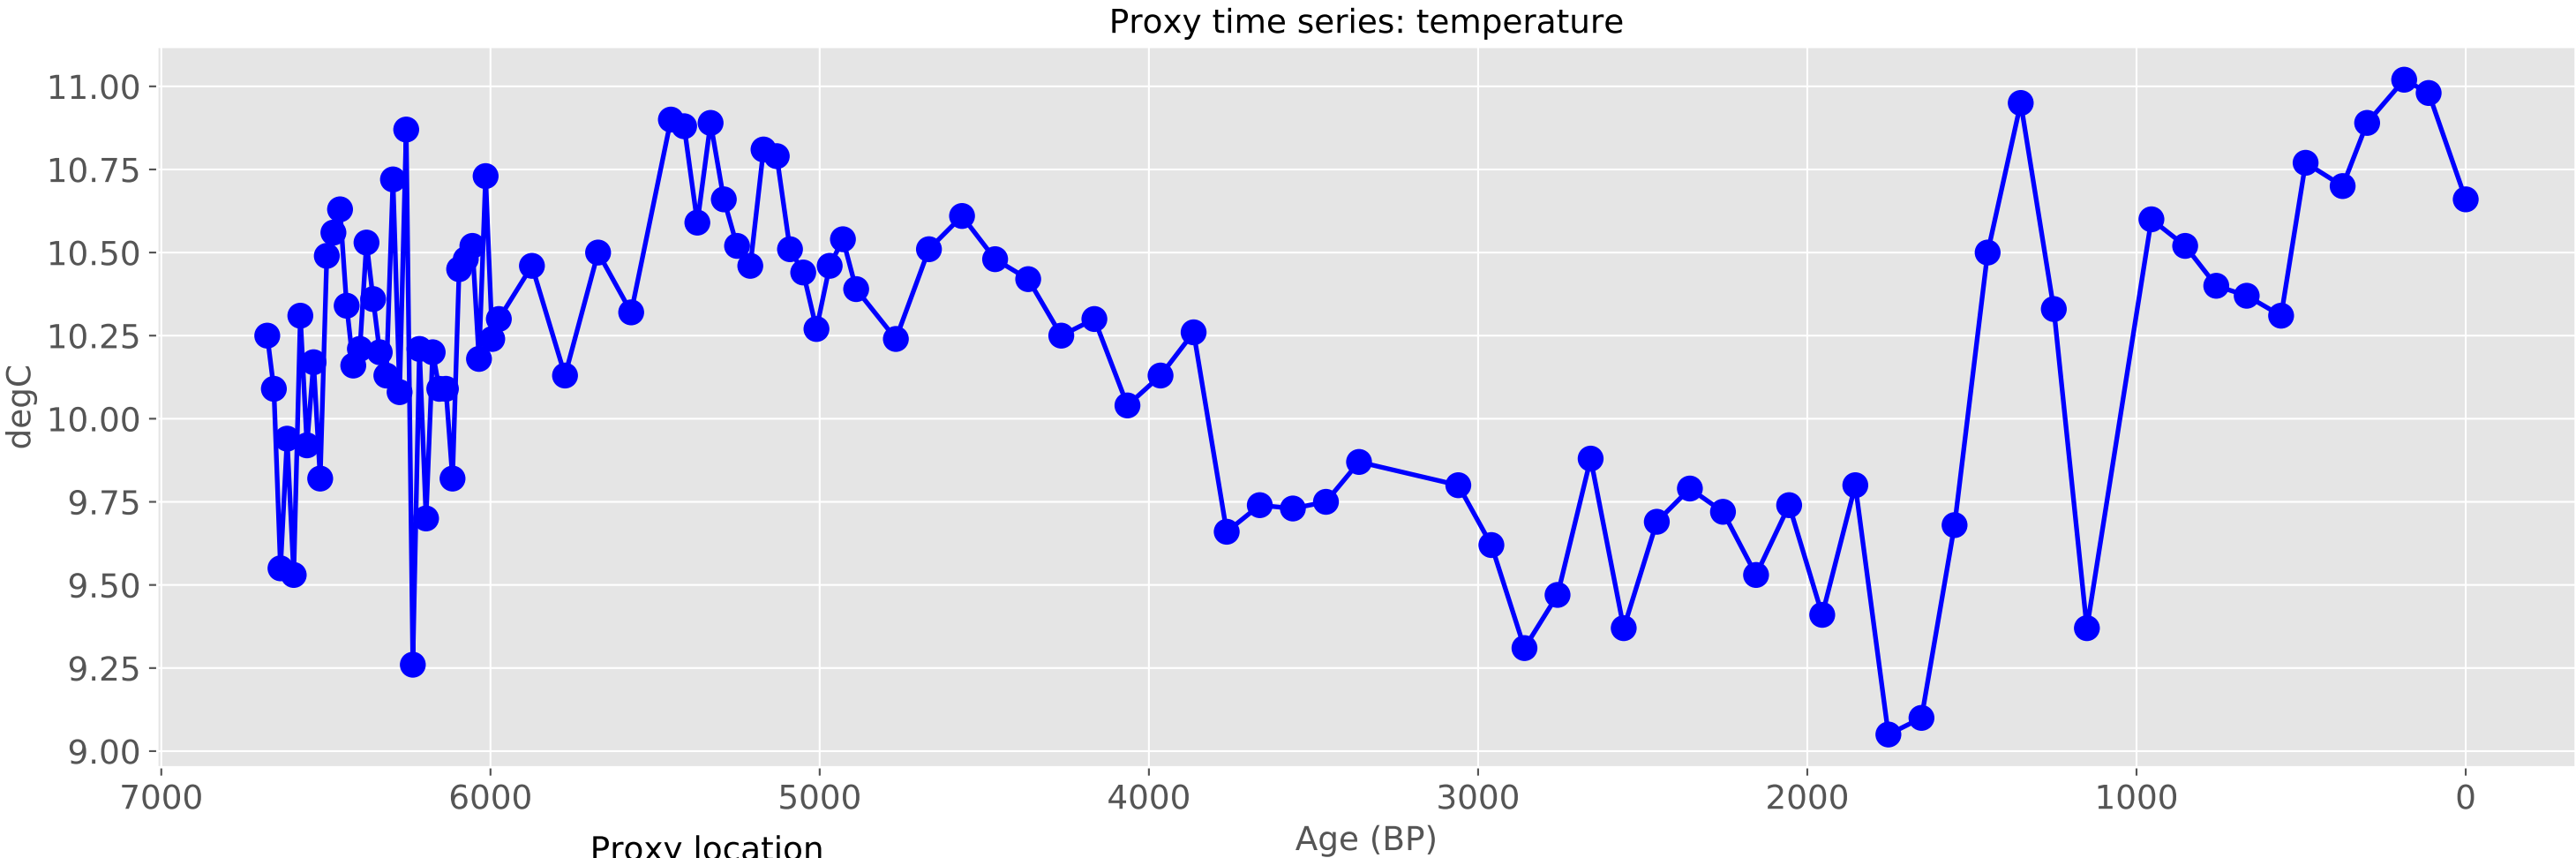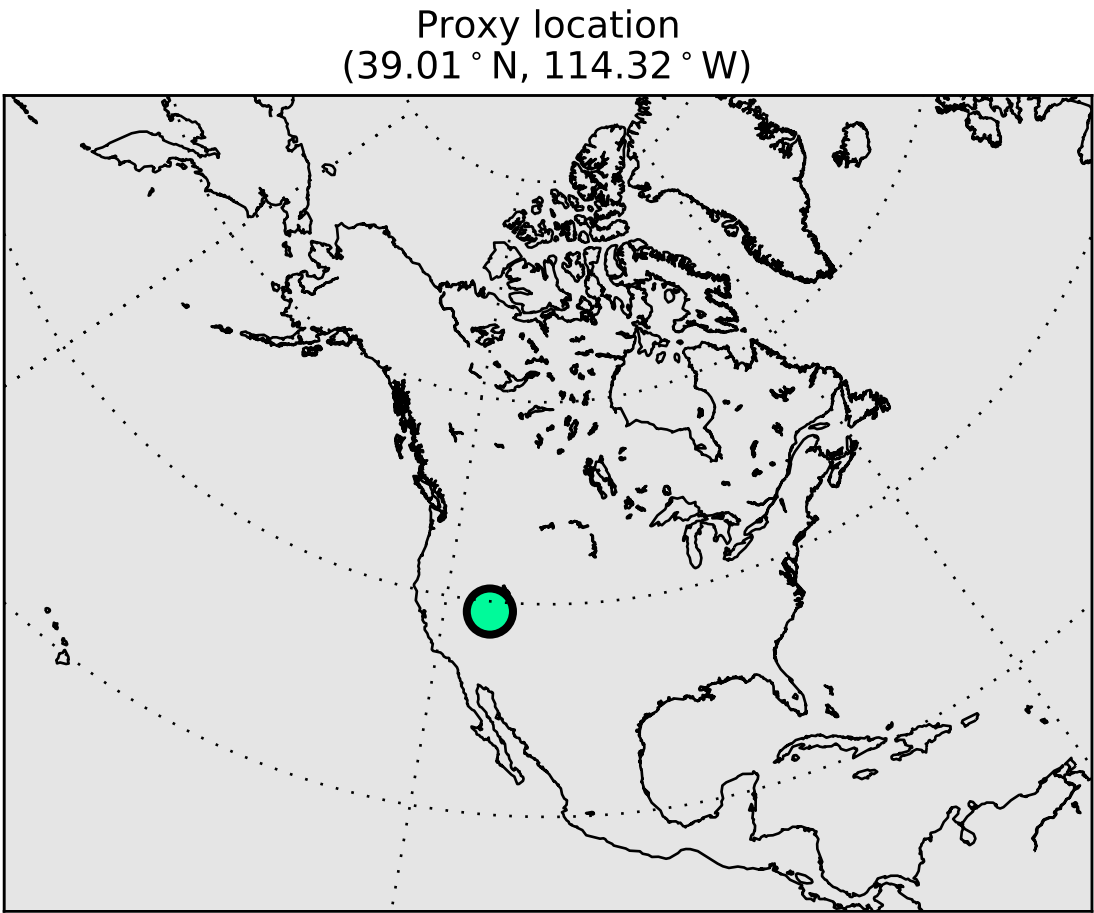

|                    |                                                                                              |
|--------------------|----------------------------------------------------------------------------------------------|
| Dataset name:      | StellaLake.Reinemann.2009                                                                    |
| Archive type:      | LakeSediment                                                                                 |
| Proxy type:        | chironomid                                                                                   |
| Variable name:     | temperature                                                                                  |
| Latitude ( ° N):   | 39.005                                                                                       |
| Longitude ( ° E):  | -114.32                                                                                      |
| Elevation (m):     | 3170.0                                                                                       |
| Interp. variable:  | T                                                                                            |
| Interp. detail:    | air@surface                                                                                  |
| Interp. season:    | summerOnly                                                                                   |
| Interp. direction: | positive                                                                                     |
| Pub. 1 title:      | A multi-proxy paleolimnological reconstruction of ...                                        |
| Pub. 1 authors:    | Reinemann, Scott A.; Porinchu, David F.; Bloom, Am...                                        |
| Pub. 1 year:       | 2009                                                                                         |
| Pub. 1 DOI:        | 10.1016/j.yqres.2009.06.003                                                                  |
| Original data URL: | <a href="http://www.ncdc.noaa.gov/paleo/study/27330">www.ncdc.noaa.gov/paleo/study/27330</a> |

Proxy data and metadata  
LakeSediment | chironomid | HiddenLakeCA.Potito.2006 | RIRxCH0hUy2

Proxy time series: temperature

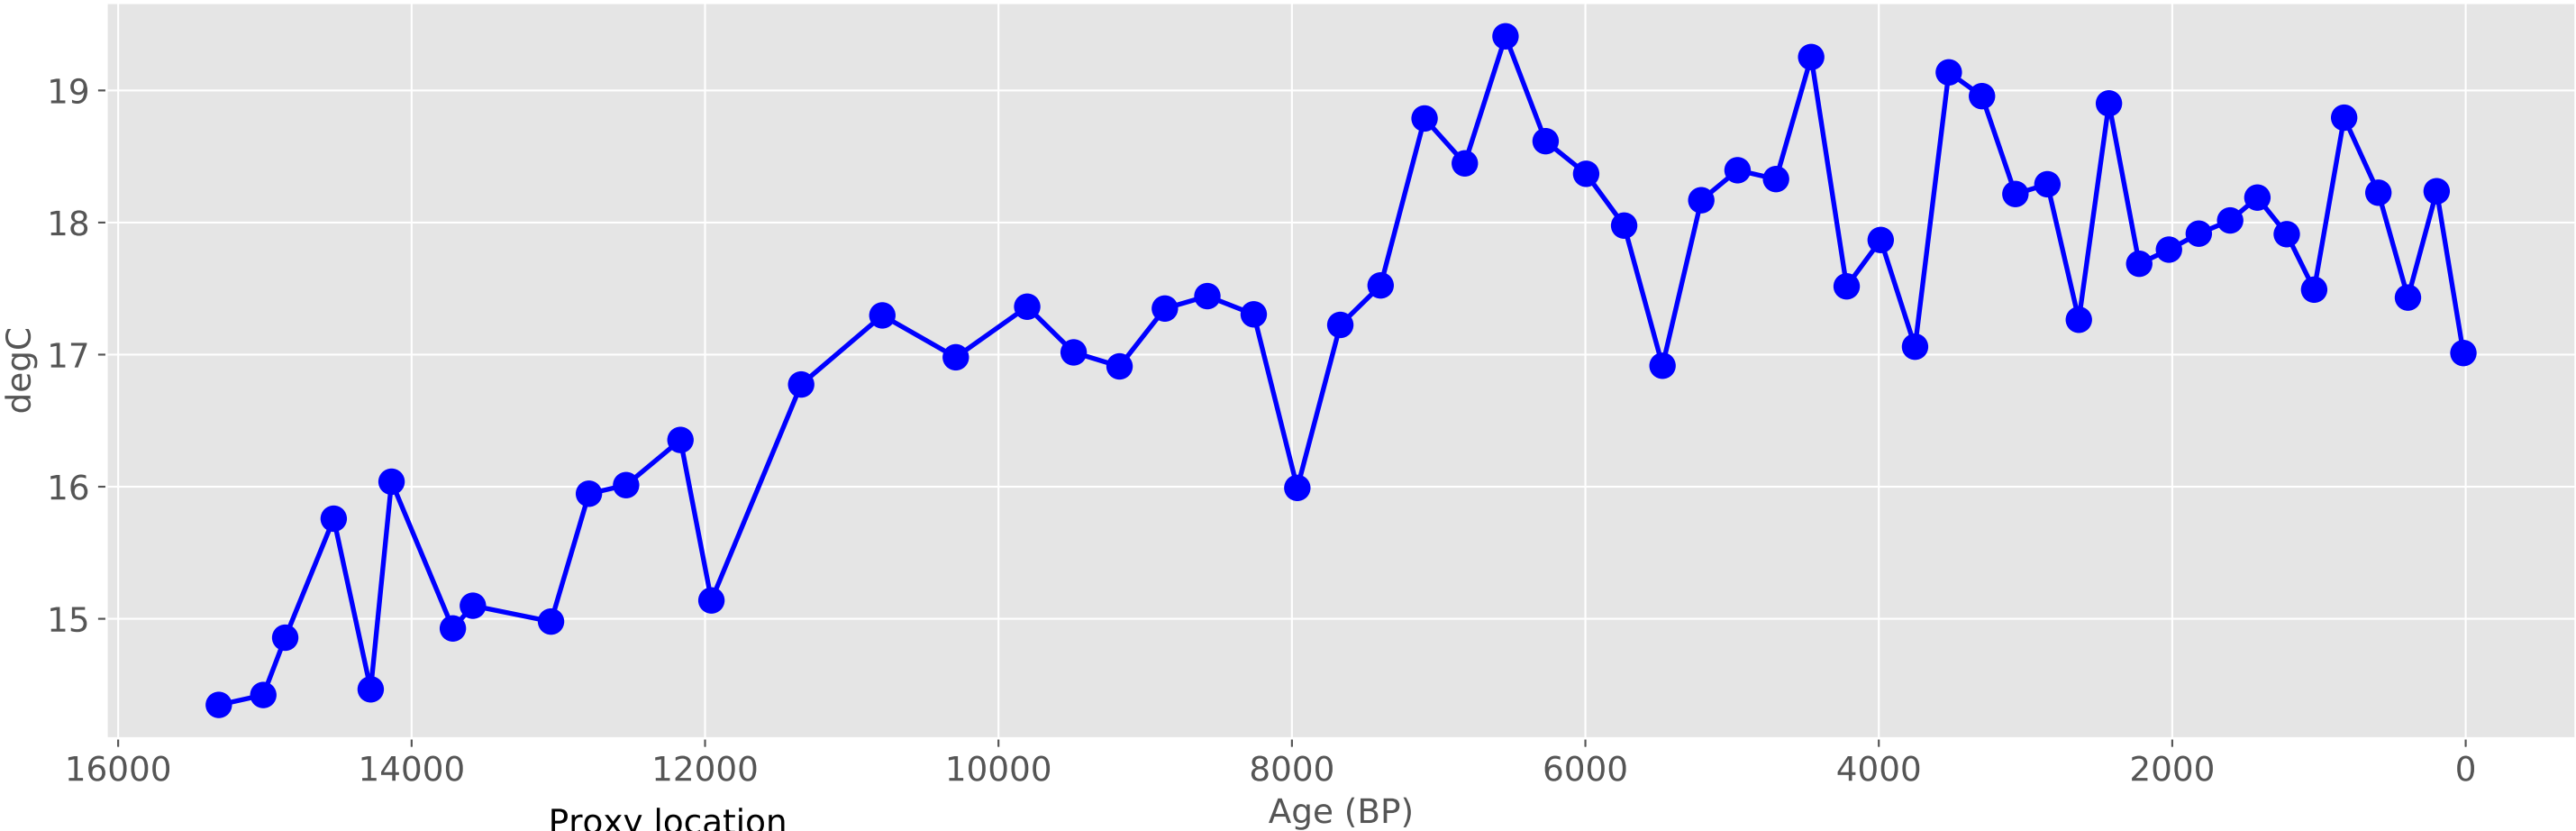

Proxy location  
(38.26 ° N, 119.54 ° W)

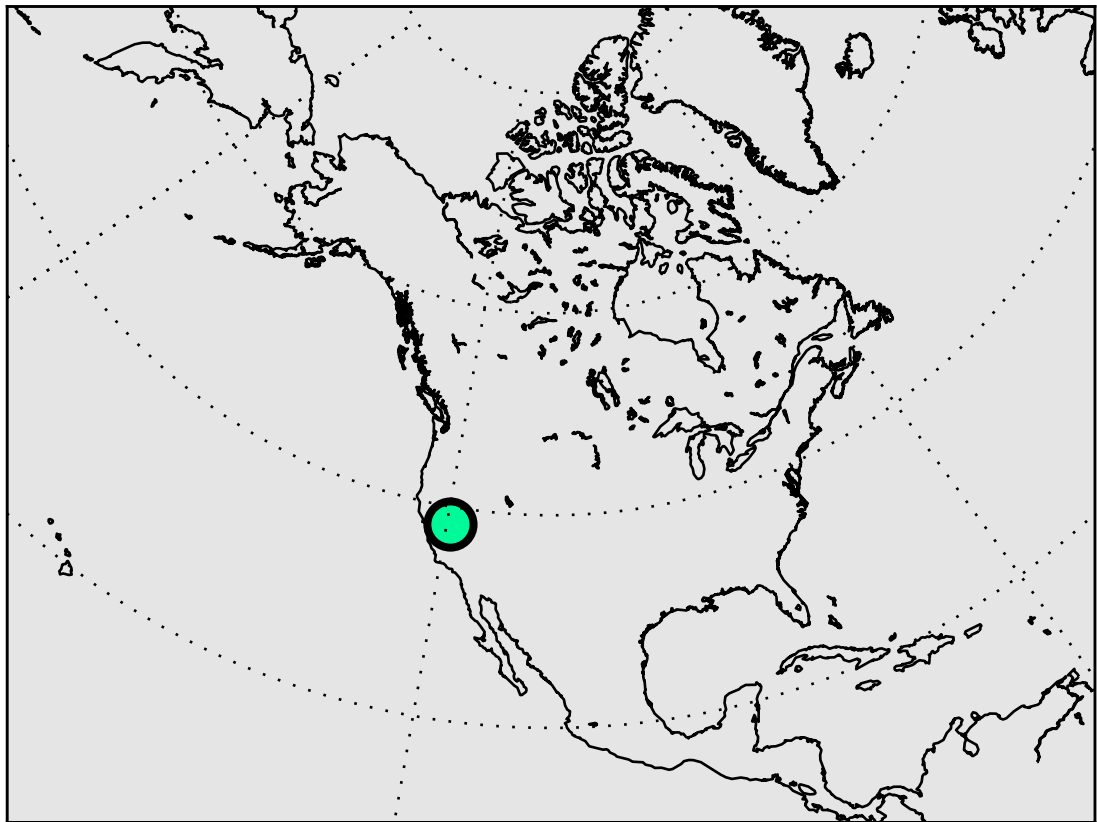

|                    |                                                                                              |
|--------------------|----------------------------------------------------------------------------------------------|
| Dataset name:      | HiddenLakeCA.Potito.2006                                                                     |
| Archive type:      | LakeSediment                                                                                 |
| Proxy type:        | chironomid                                                                                   |
| Variable name:     | temperature                                                                                  |
| Latitude ( ° N):   | 38.2613                                                                                      |
| Longitude ( ° E):  | -119.5365                                                                                    |
| Elevation (m):     | 2379.0                                                                                       |
| Interp. variable:  | T                                                                                            |
| Interp. detail:    | lake@surface                                                                                 |
| Interp. season:    | summerOnly                                                                                   |
| Interp. direction: | positive                                                                                     |
| Pub. 1 title:      | A late Quaternary chironomid-inferred temperature ...                                        |
| Pub. 1 authors:    | Potito, Aaron P.                                                                             |
| Pub. 1 year:       | 2006                                                                                         |
| Pub. 1 DOI:        | 10.1016/j.yqres.2006.05.005                                                                  |
| Original data URL: | <a href="http://www.ncdc.noaa.gov/paleo/study/27330">www.ncdc.noaa.gov/paleo/study/27330</a> |

Proxy data and metadata  
LakeSediment | chlorophyll | Kurupa.Boldt.2015 | NAm2kHydro240

Proxy time series: temperature

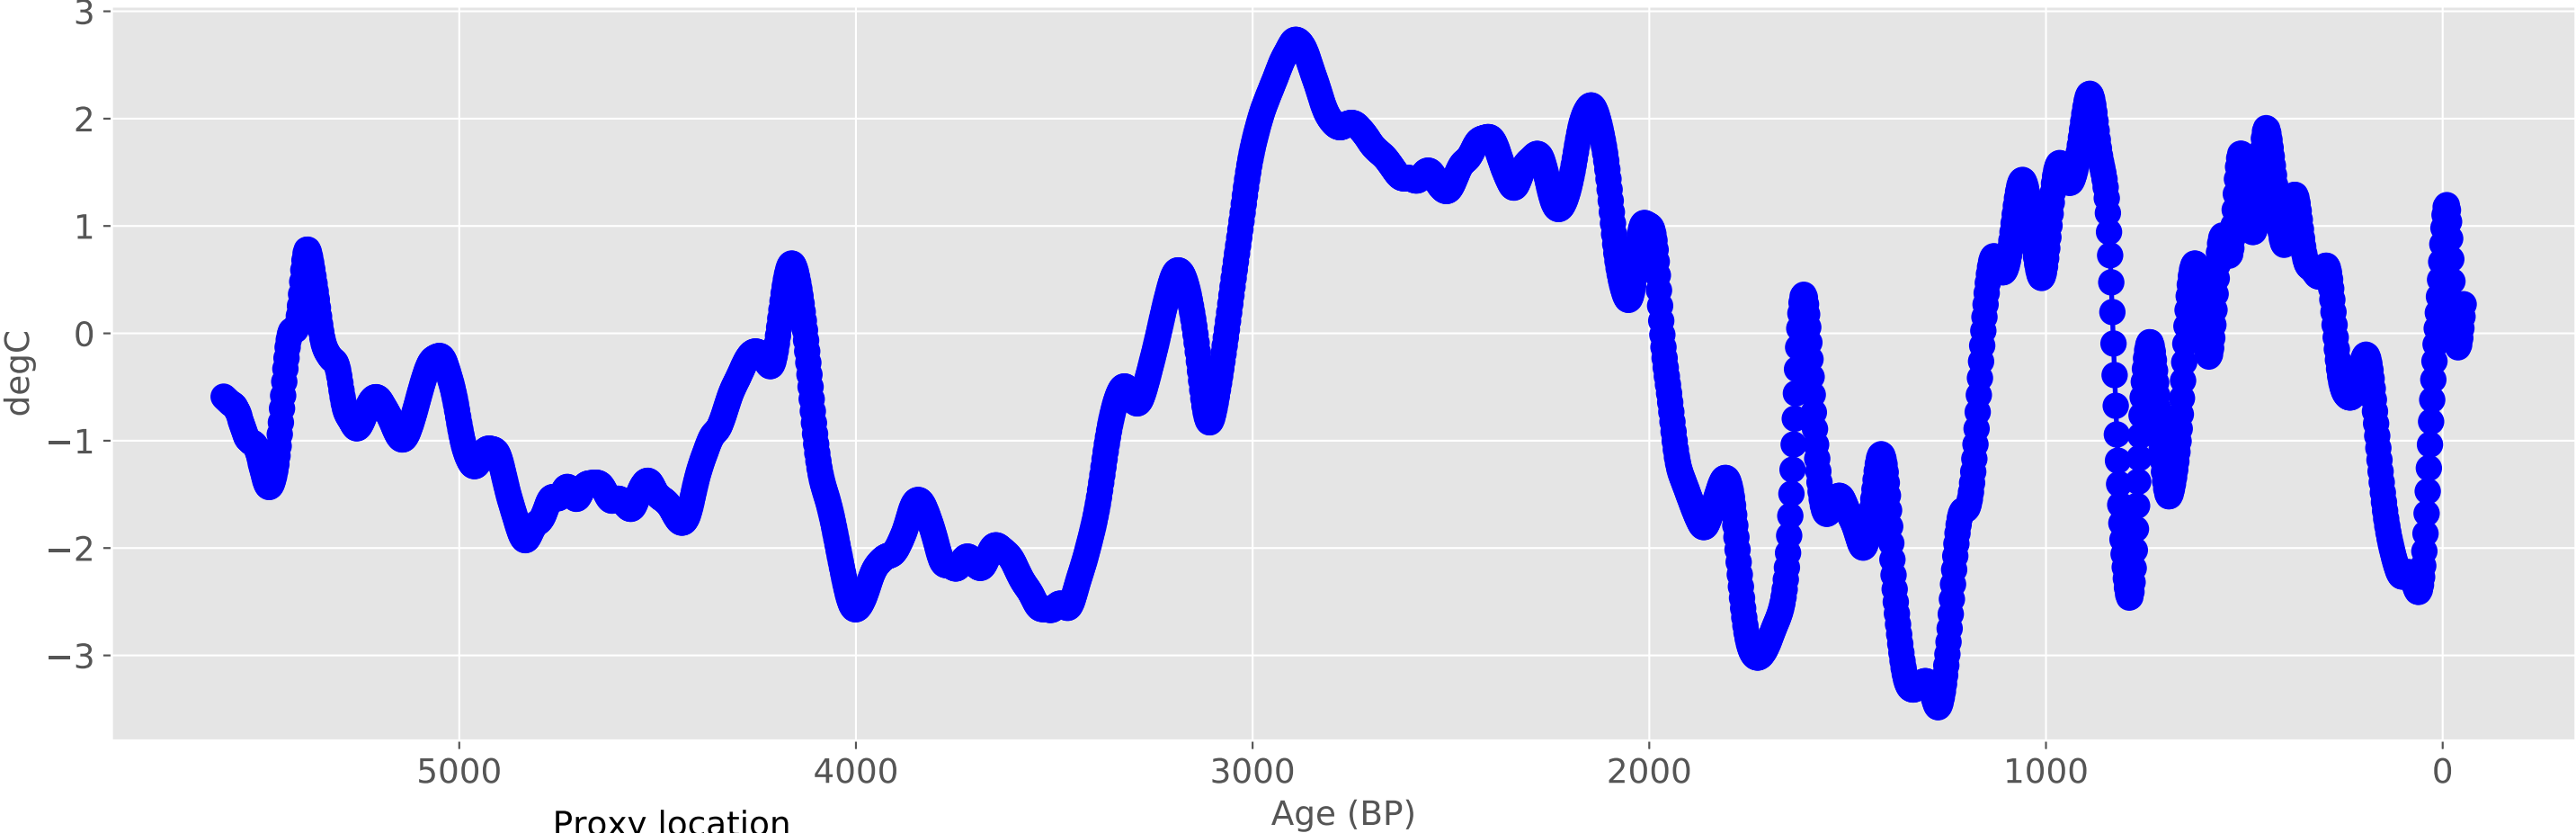

Proxy location  
(68.35 ° N, 154.61 ° W)

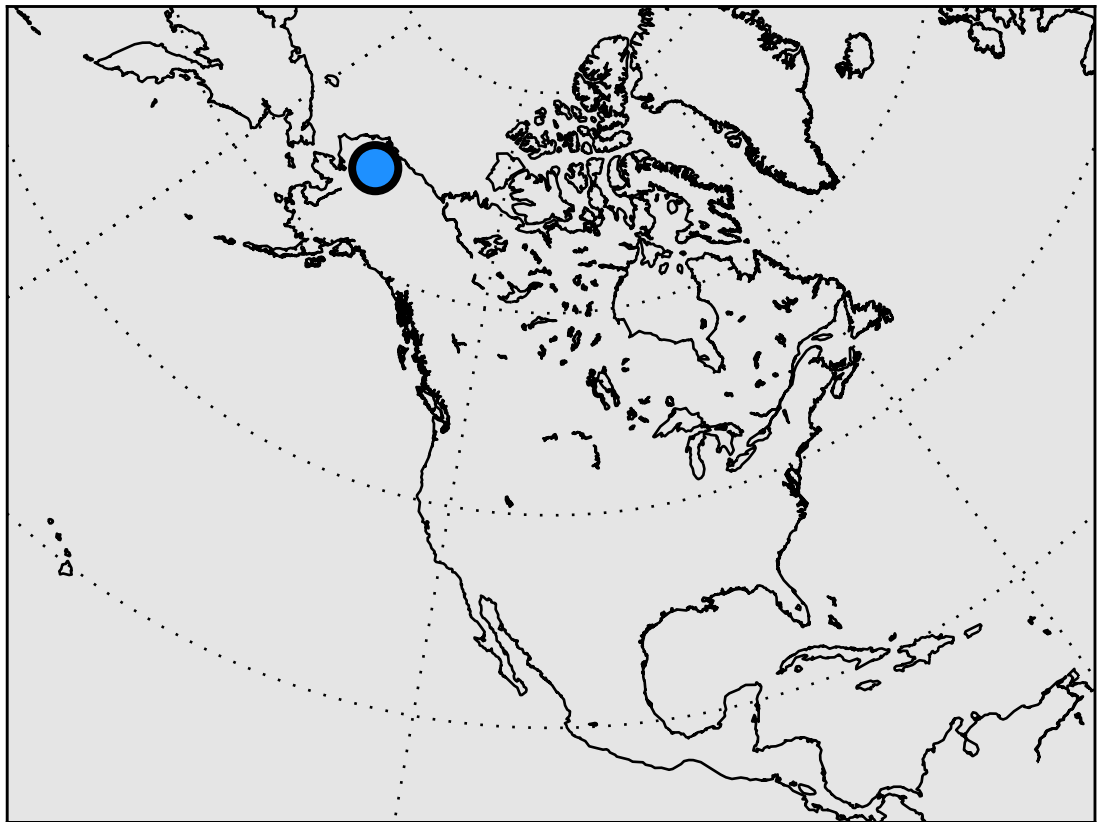

|                    |                                                                                              |
|--------------------|----------------------------------------------------------------------------------------------|
| Dataset name:      | Kurupa.Boldt.2015                                                                            |
| Archive type:      | LakeSediment                                                                                 |
| Proxy type:        | chlorophyll                                                                                  |
| Variable name:     | temperature                                                                                  |
| Latitude ( ° N):   | 68.35                                                                                        |
| Longitude ( ° E):  | -154.61                                                                                      |
| Elevation (m):     | 920.0                                                                                        |
| Interp. variable:  | T                                                                                            |
| Interp. detail:    | air@surface                                                                                  |
| Interp. season:    | summerOnly                                                                                   |
| Interp. direction: | positive                                                                                     |
| Pub. 1 title:      | Holocene summer temperature reconstruction from se...                                        |
| Pub. 1 authors:    | Boldt, Brandon R; Kaufman, Darrell S; McKay, Nicho...                                        |
| Pub. 1 year:       | 2015                                                                                         |
| Pub. 1 DOI:        | 10.1177/0959683614565929                                                                     |
| Original data URL: | <a href="http://www.ncdc.noaa.gov/paleo/study/18995">www.ncdc.noaa.gov/paleo/study/18995</a> |

Proxy data and metadata  
LakeSediment | C/N | SilverLake.Kirby.2015 | WEB696efa25

Proxy time series: C/N

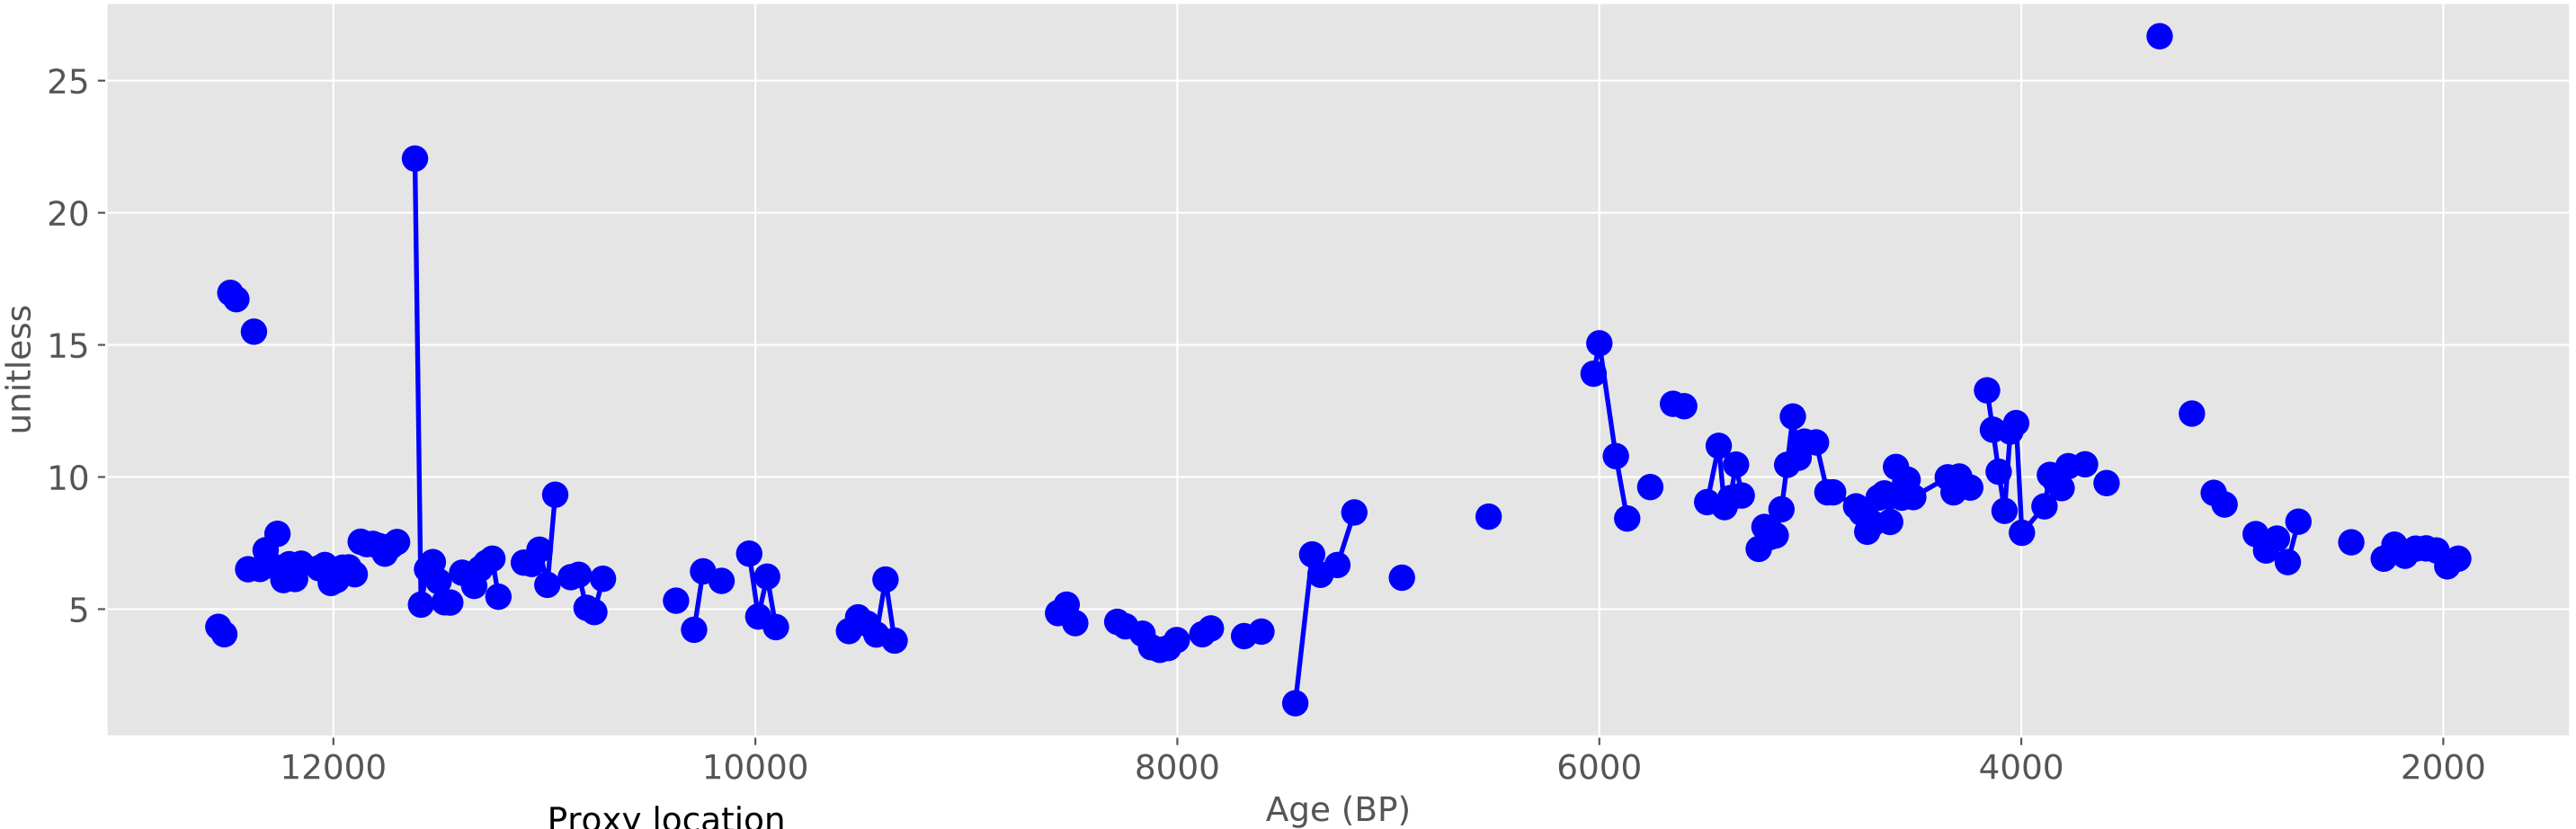

Proxy location  
(35.37° N, 116.14° W)

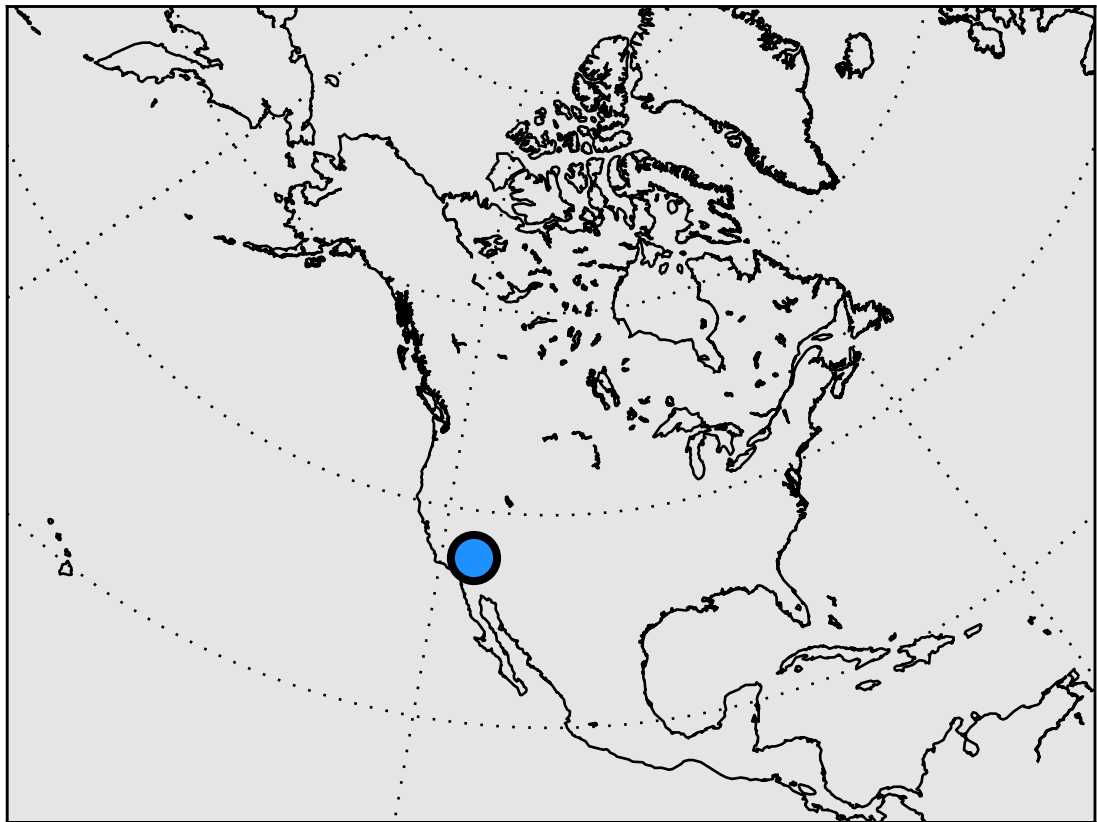

|                    |                                                                                              |
|--------------------|----------------------------------------------------------------------------------------------|
| Dataset name:      | SilverLake.Kirby.2015                                                                        |
| Archive type:      | LakeSediment                                                                                 |
| Proxy type:        | C/N                                                                                          |
| Variable name:     | C/N                                                                                          |
| Latitude (° N):    | 35.3669                                                                                      |
| Longitude (° E):   | -116.135                                                                                     |
| Elevation (m):     | 277.0                                                                                        |
| Interp. variable:  | P-E                                                                                          |
| Interp. detail:    | @surface                                                                                     |
| Interp. season:    | annual                                                                                       |
| Interp. direction: | negative                                                                                     |
| Pub. 1 title:      | Evidence for insolation and Pacific forcing of lat...                                        |
| Pub. 1 authors:    | Kirby, Matthew E.;Knell, Edward J.;Anderson, Willi...                                        |
| Pub. 1 year:       | 2015                                                                                         |
| Pub. 1 DOI:        | 10.1016/j.yqres.2015.07.003                                                                  |
| Original data URL: | <a href="http://www.ncdc.noaa.gov/paleo/study/20106">www.ncdc.noaa.gov/paleo/study/20106</a> |



Proxy data and metadata

LakeSediment | C/N | LowerBearLake.Kirby.2012 | WEBebd88a42

Proxy time series: molarCN

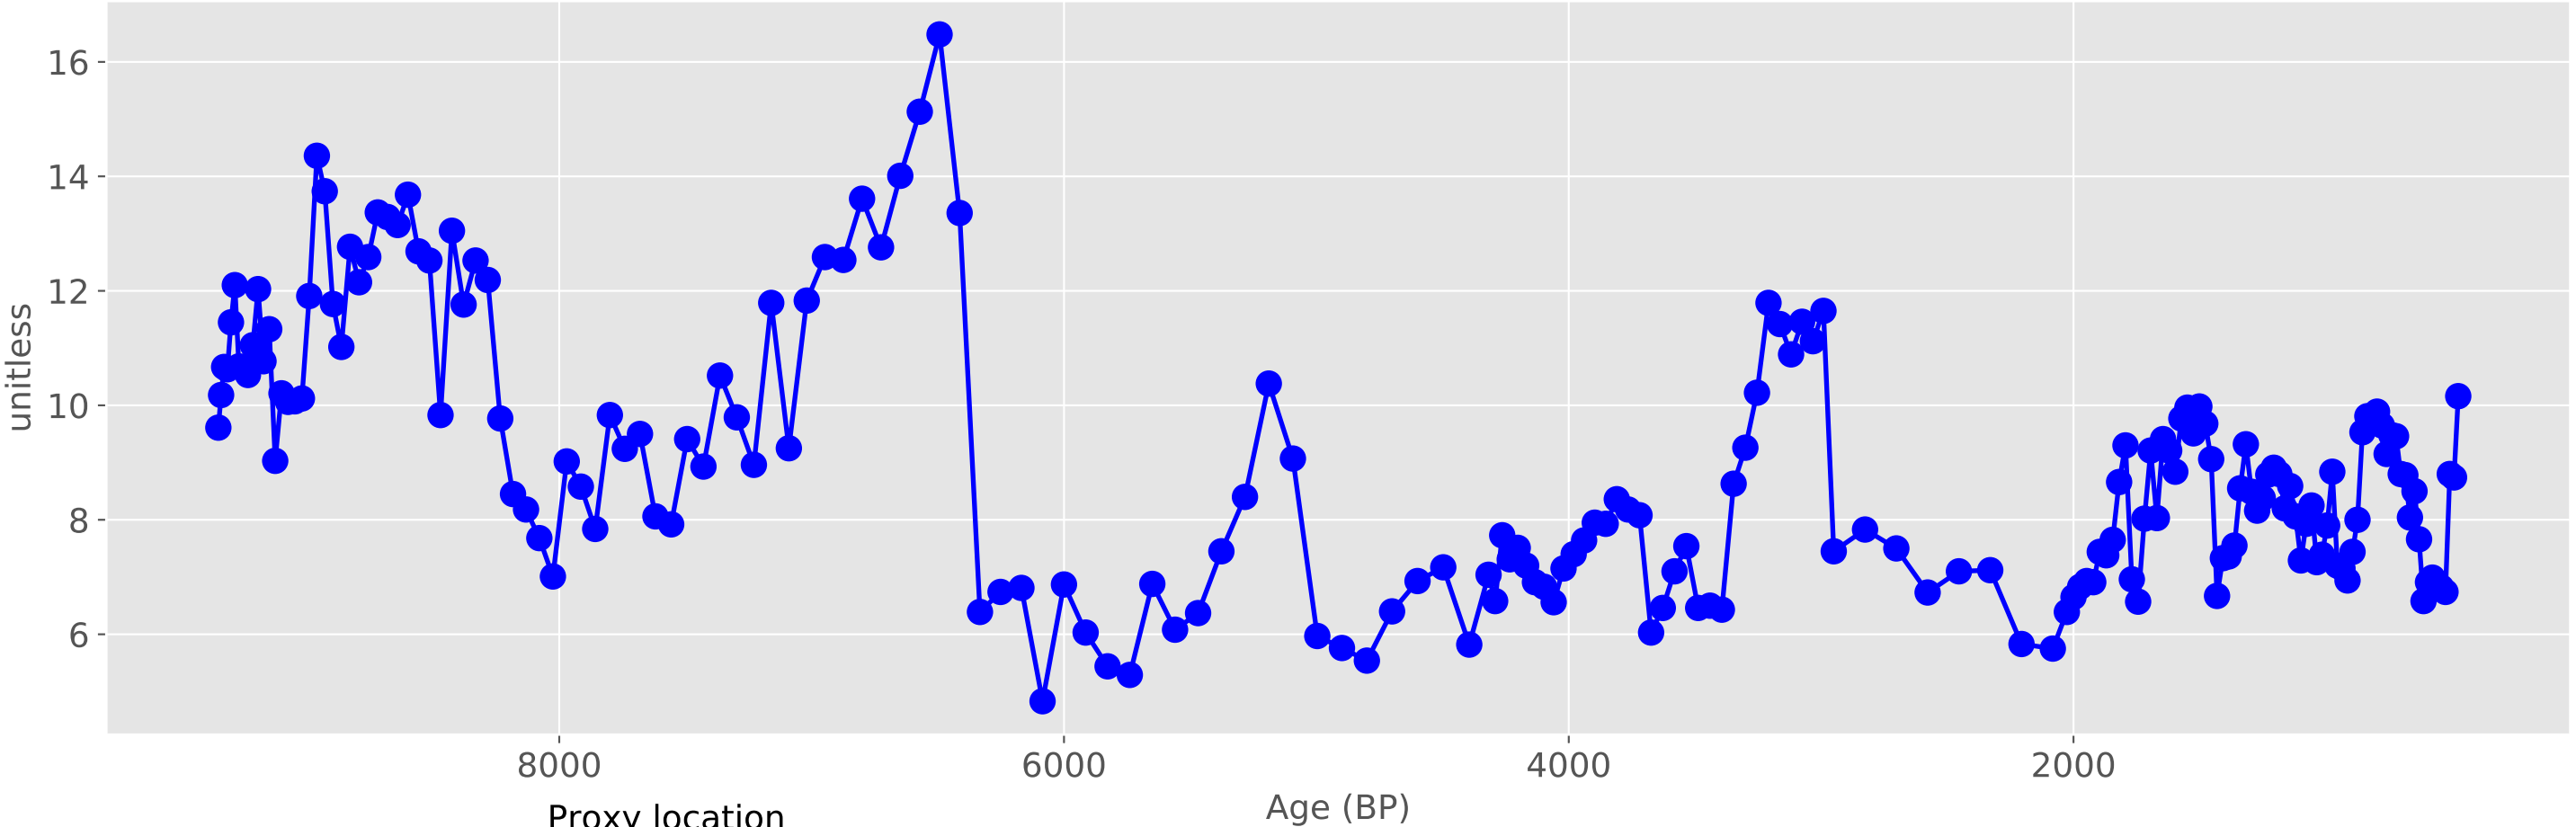

Proxy location  
(34.20 ° N, 116.90 ° W)

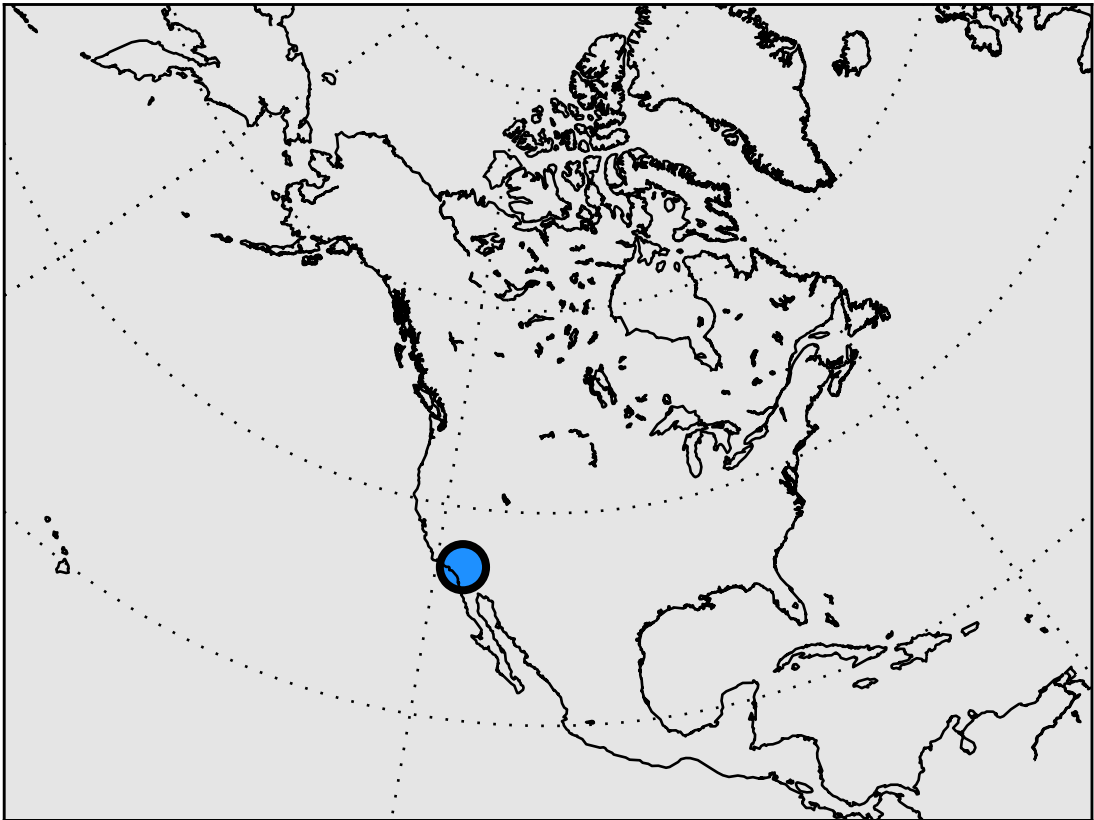

|                    |                                                                                              |
|--------------------|----------------------------------------------------------------------------------------------|
| Dataset name:      | LowerBearLake.Kirby.2012                                                                     |
| Archive type:      | LakeSediment                                                                                 |
| Proxy type:        | C/N                                                                                          |
| Variable name:     | molarCN                                                                                      |
| Latitude ( ° N):   | 34.2                                                                                         |
| Longitude ( ° E):  | -116.9                                                                                       |
| Elevation (m):     | 2059.0                                                                                       |
| Interp. variable:  | P                                                                                            |
| Interp. detail:    | runoff@surface                                                                               |
| Interp. season:    | annual                                                                                       |
| Interp. direction: | positive                                                                                     |
| Pub. 1 title:      | A 9170-year record of decadal-to-multi-centennial ...                                        |
| Pub. 1 authors:    | Kirby, Matthew E.;Zimmerman, Susan R.H.;Patterson,...                                        |
| Pub. 1 year:       | 2012                                                                                         |
| Pub. 1 DOI:        | 10.1016/j.quascirev.2012.05.008                                                              |
| Original data URL: | <a href="http://www.ncdc.noaa.gov/paleo/study/13215">www.ncdc.noaa.gov/paleo/study/13215</a> |

Proxy data and metadata  
LakeSediment | d13C | Dune.Finney.2012 | GHe9193cd5dp

Proxy time series: d13C

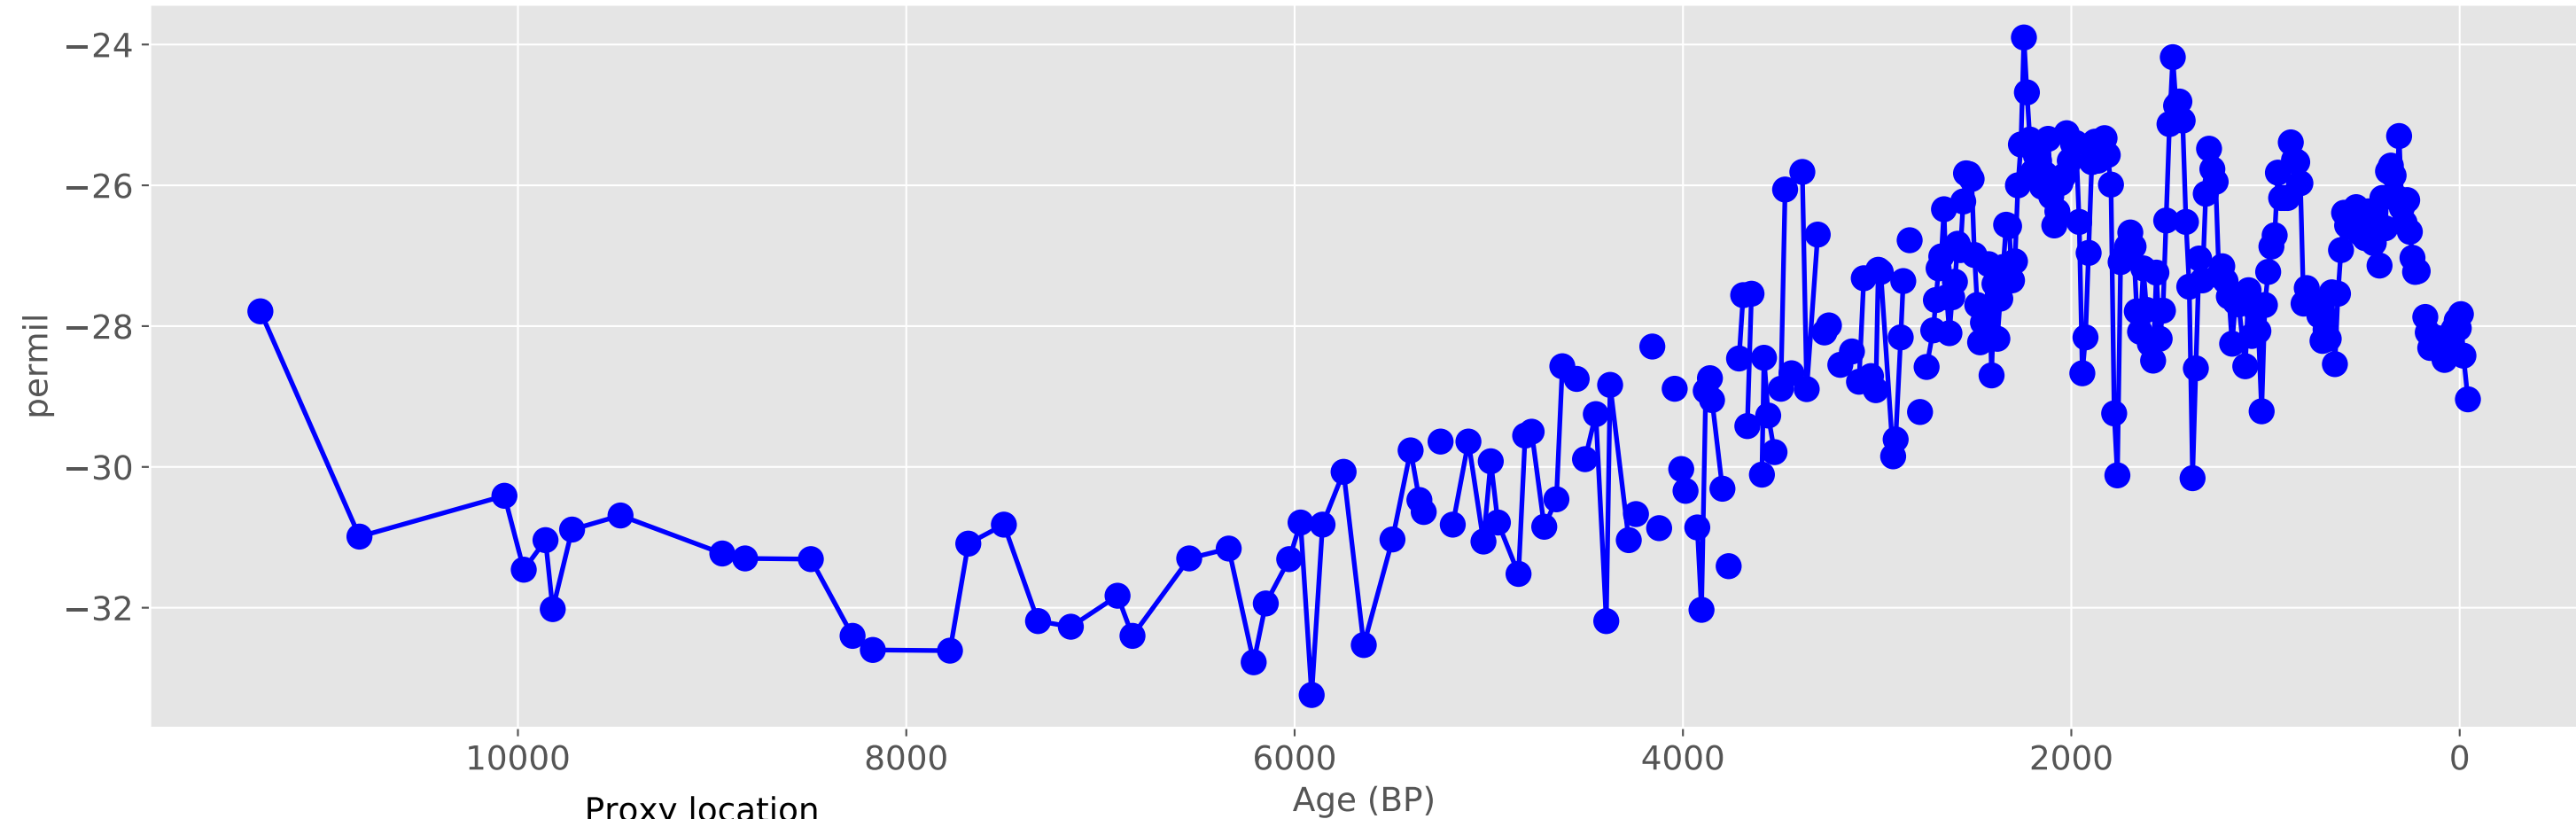

Proxy location  
(64.42 ° N, 149.90 ° W)

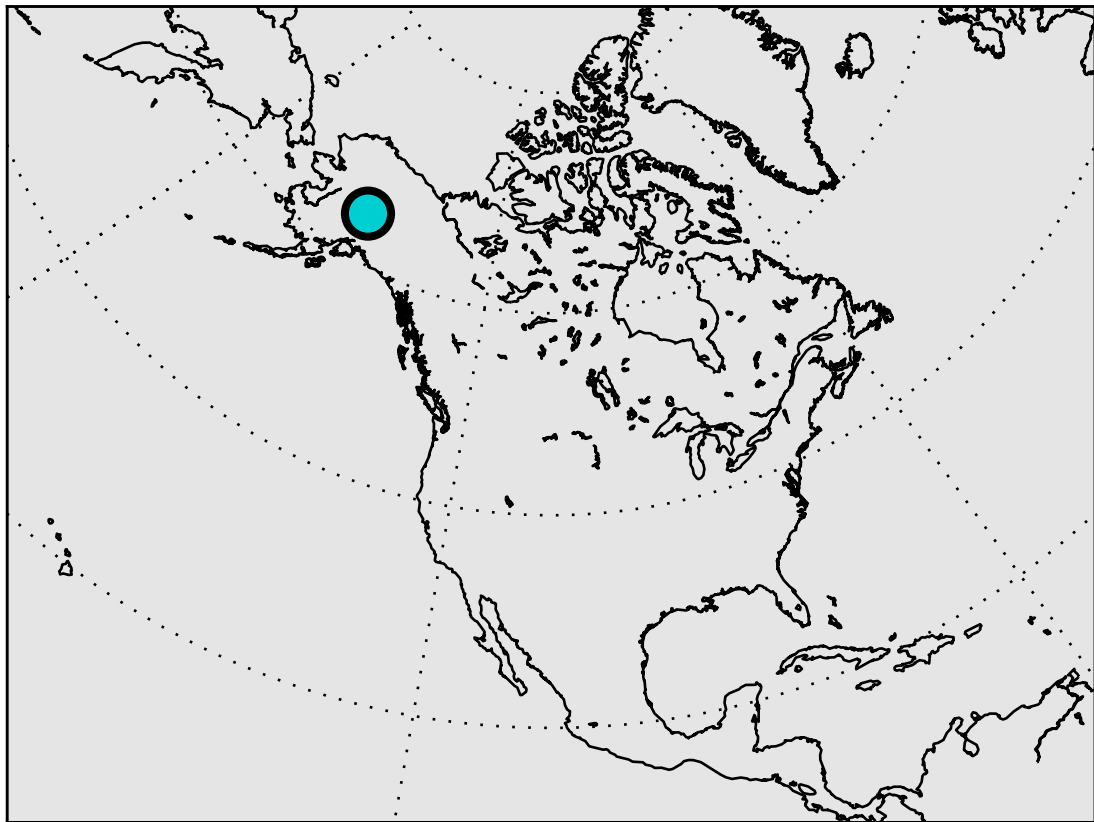

|                    |                                                                                              |
|--------------------|----------------------------------------------------------------------------------------------|
| Dataset name:      | Dune.Finney.2012                                                                             |
| Archive type:      | LakeSediment                                                                                 |
| Proxy type:        | d13C                                                                                         |
| Variable name:     | d13C                                                                                         |
| Latitude ( ° N):   | 64.42                                                                                        |
| Longitude ( ° E):  | -149.9                                                                                       |
| Elevation (m):     | 134.0                                                                                        |
| Interp. variable:  | P-E                                                                                          |
| Interp. detail:    | groundWaterLevel                                                                             |
| Interp. season:    | annual                                                                                       |
| Interp. direction: | negative                                                                                     |
| Pub. 1 title:      | Holocene climate change and carbon cycling in a gr...                                        |
| Pub. 1 authors:    | Finney, Bruce P.;Bigelow, Nancy H.;Barber, Valerie...                                        |
| Pub. 1 year:       | 2012                                                                                         |
| Pub. 1 DOI:        | 10.1007/s10933-012-9617-2                                                                    |
| Original data URL: | <a href="http://www.ncdc.noaa.gov/paleo/study/13076">www.ncdc.noaa.gov/paleo/study/13076</a> |

Proxy data and metadata  
**LakeSediment | d13C | ParadiseLake.Steinman.2016 | LPDb99b434c**

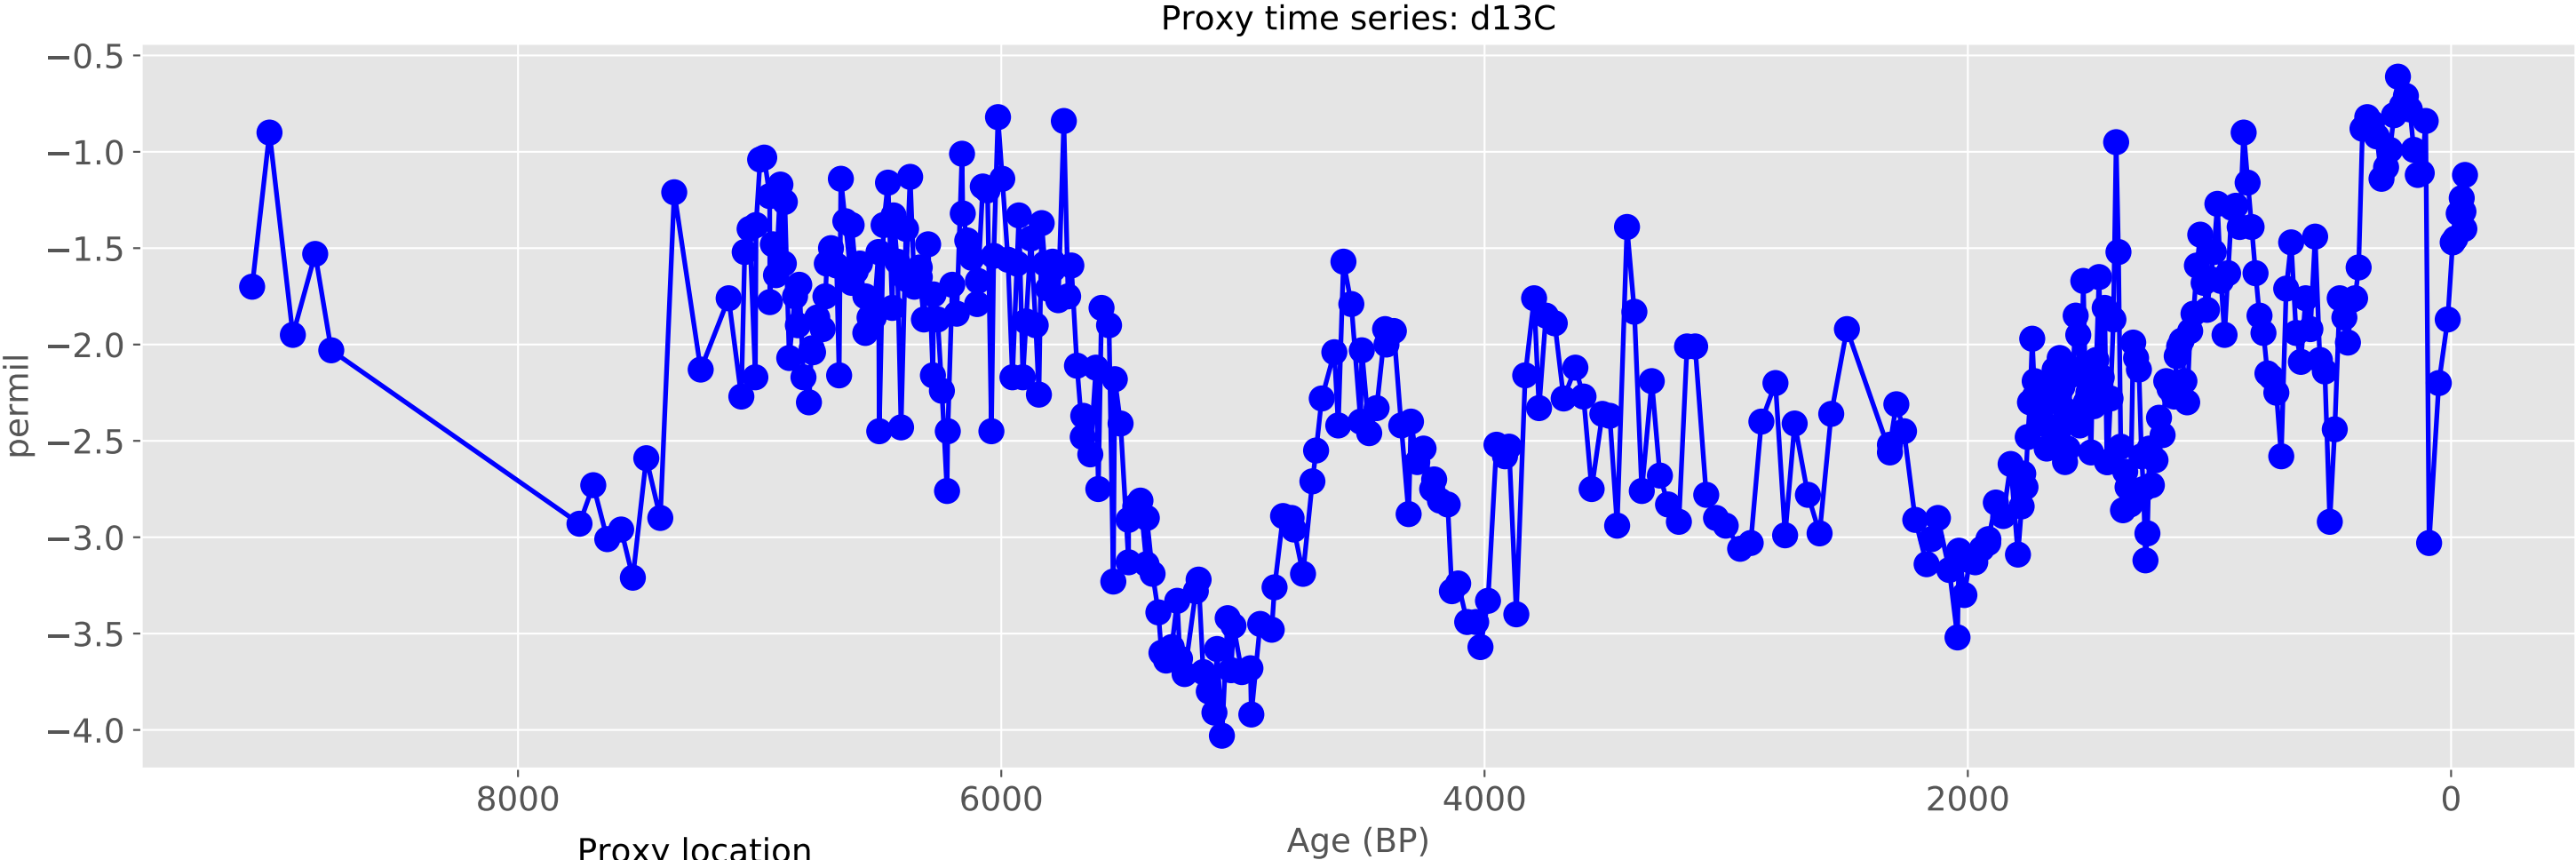

Proxy location  
(54.69 ° N, 122.62 ° W)

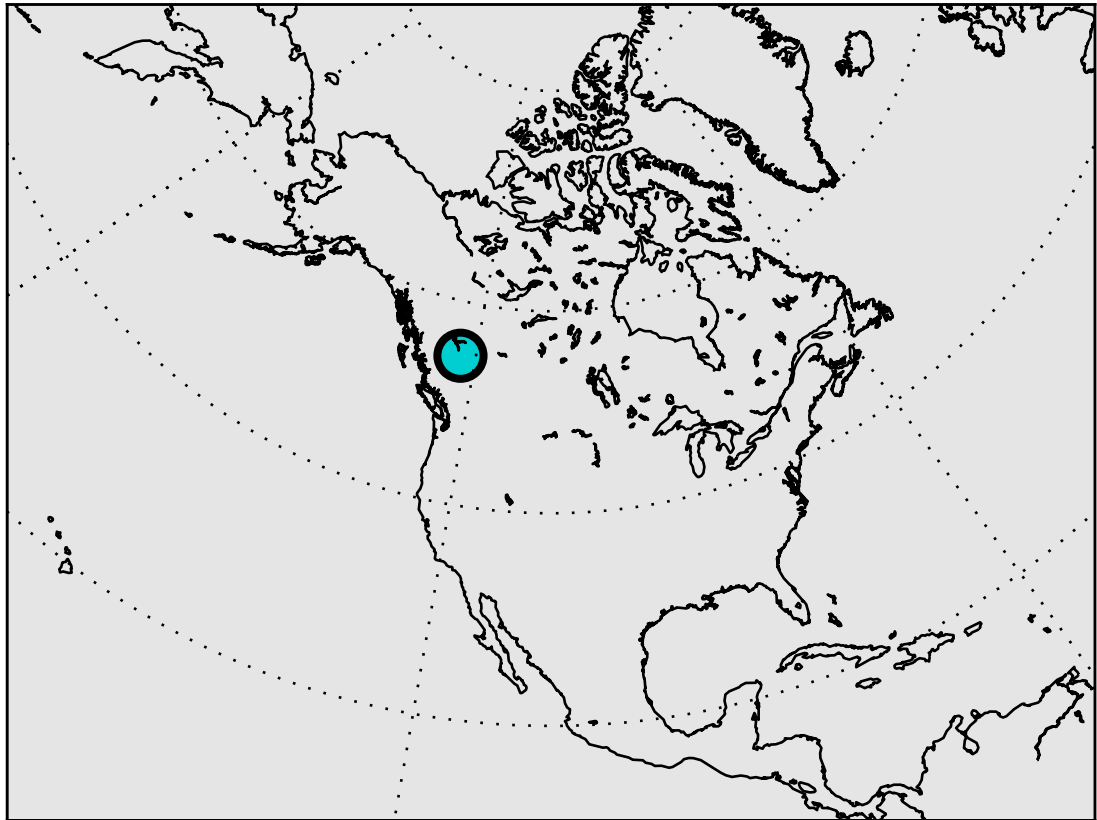

|                    |                                                                                              |
|--------------------|----------------------------------------------------------------------------------------------|
| Dataset name:      | ParadiseLake.Steinman.2016                                                                   |
| Archive type:      | LakeSediment                                                                                 |
| Proxy type:        | d13C                                                                                         |
| Variable name:     | d13C                                                                                         |
| Latitude ( ° N):   | 54.685                                                                                       |
| Longitude ( ° E):  | -122.617                                                                                     |
| Elevation (m):     | 733.0                                                                                        |
| Interp. variable:  | P-E                                                                                          |
| Interp. detail:    | lakeLevel@surface                                                                            |
| Interp. season:    | winterOnly                                                                                   |
| Interp. direction: | negative                                                                                     |
| Pub. 1 title:      | Oxygen isotope records of Holocene climate variabi...                                        |
| Pub. 1 authors:    | Steinman, Byron A.;Pompeani, David P.;Abbott, Mark...                                        |
| Pub. 1 year:       | 2016                                                                                         |
| Pub. 1 DOI:        | 10.1016/j.quascirev.2016.04.012                                                              |
| Original data URL: | <a href="http://www.ncdc.noaa.gov/paleo/study/21250">www.ncdc.noaa.gov/paleo/study/21250</a> |

Proxy data and metadata  
**LakeSediment | d13C | ClelandLake.Steinman.2016 | LPD87c74b66**

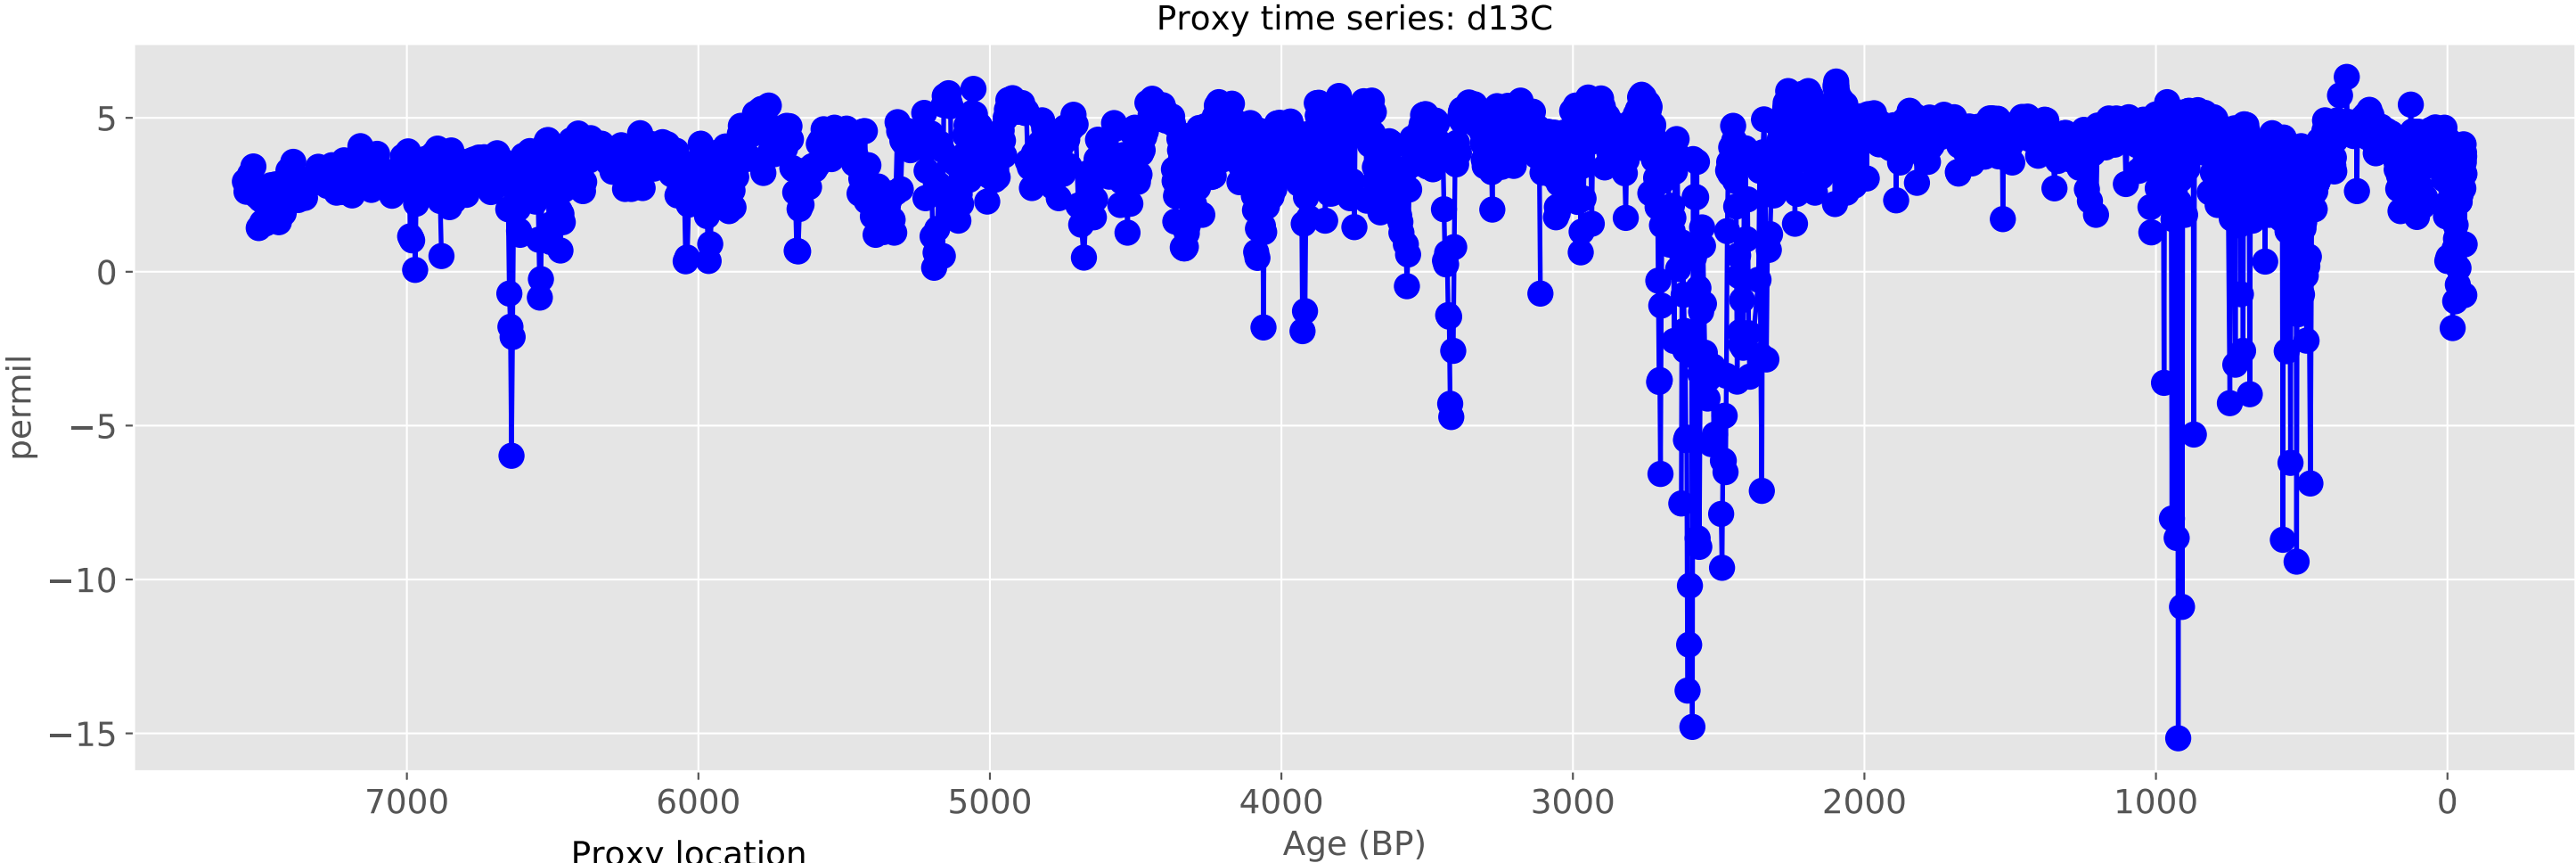

Proxy location  
(50.83 ° N, 116.39 ° W)

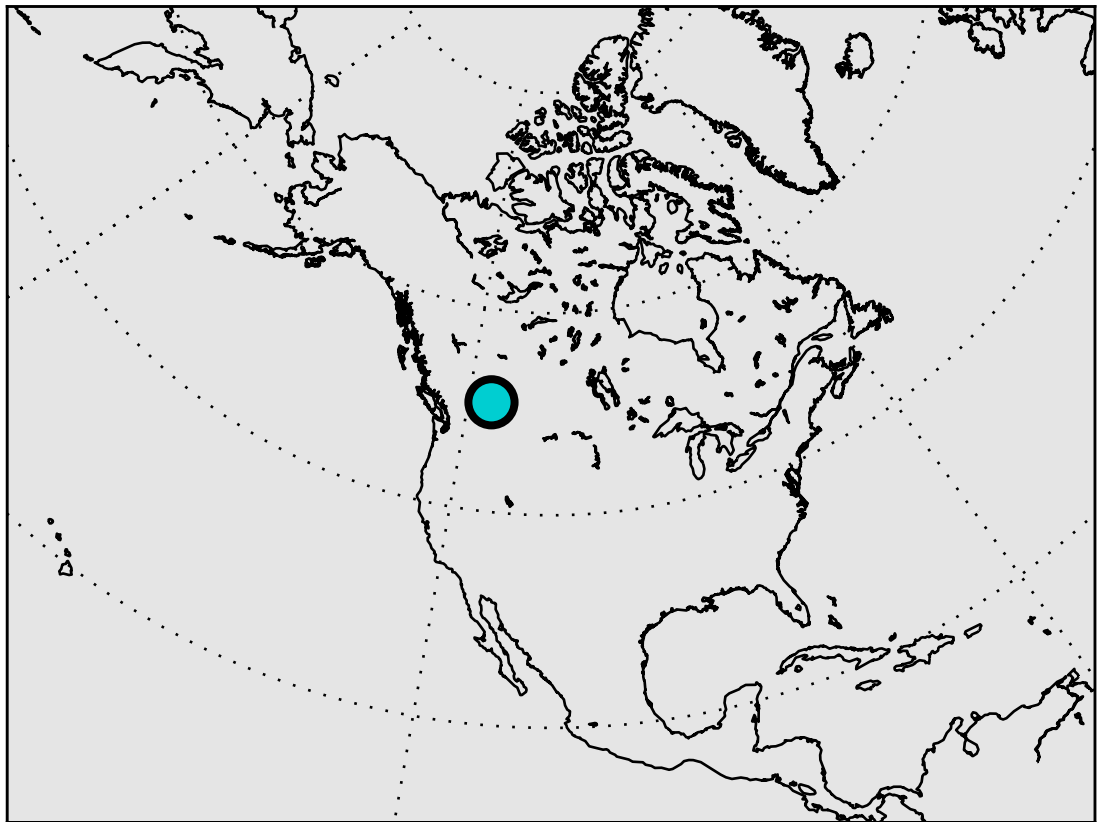

|                    |                                                                                                            |
|--------------------|------------------------------------------------------------------------------------------------------------|
| Dataset name:      | ClelandLake.Steinman.2016                                                                                  |
| Archive type:      | LakeSediment                                                                                               |
| Proxy type:        | d13C                                                                                                       |
| Variable name:     | d13C                                                                                                       |
| Latitude ( ° N):   | 50.83                                                                                                      |
| Longitude ( ° E):  | -116.39                                                                                                    |
| Elevation (m):     | 1126.0                                                                                                     |
| Interp. variable:  | P-E                                                                                                        |
| Interp. detail:    | lakeLevel@surface                                                                                          |
| Interp. season:    | winterOnly                                                                                                 |
| Interp. direction: | negative                                                                                                   |
| Pub. 1 title:      | Oxygen isotope records of Holocene climate variabi...                                                      |
| Pub. 1 authors:    | Steinman, Byron A.;Pompeani, David P.;Abbott, Mark...                                                      |
| Pub. 1 year:       | 2016                                                                                                       |
| Pub. 1 DOI:        | 10.1016/j.quascirev.2016.04.012                                                                            |
| Original data URL: | <a href="http://www.ncdc.noaa.gov/paleo-search/study/21250">www.ncdc.noaa.gov/paleo-search/study/21250</a> |

Proxy data and metadata  
**LakeSediment | d13C | LimeLake.Steinman.2016 | LPD17fc7c77**

Proxy time series: d13C

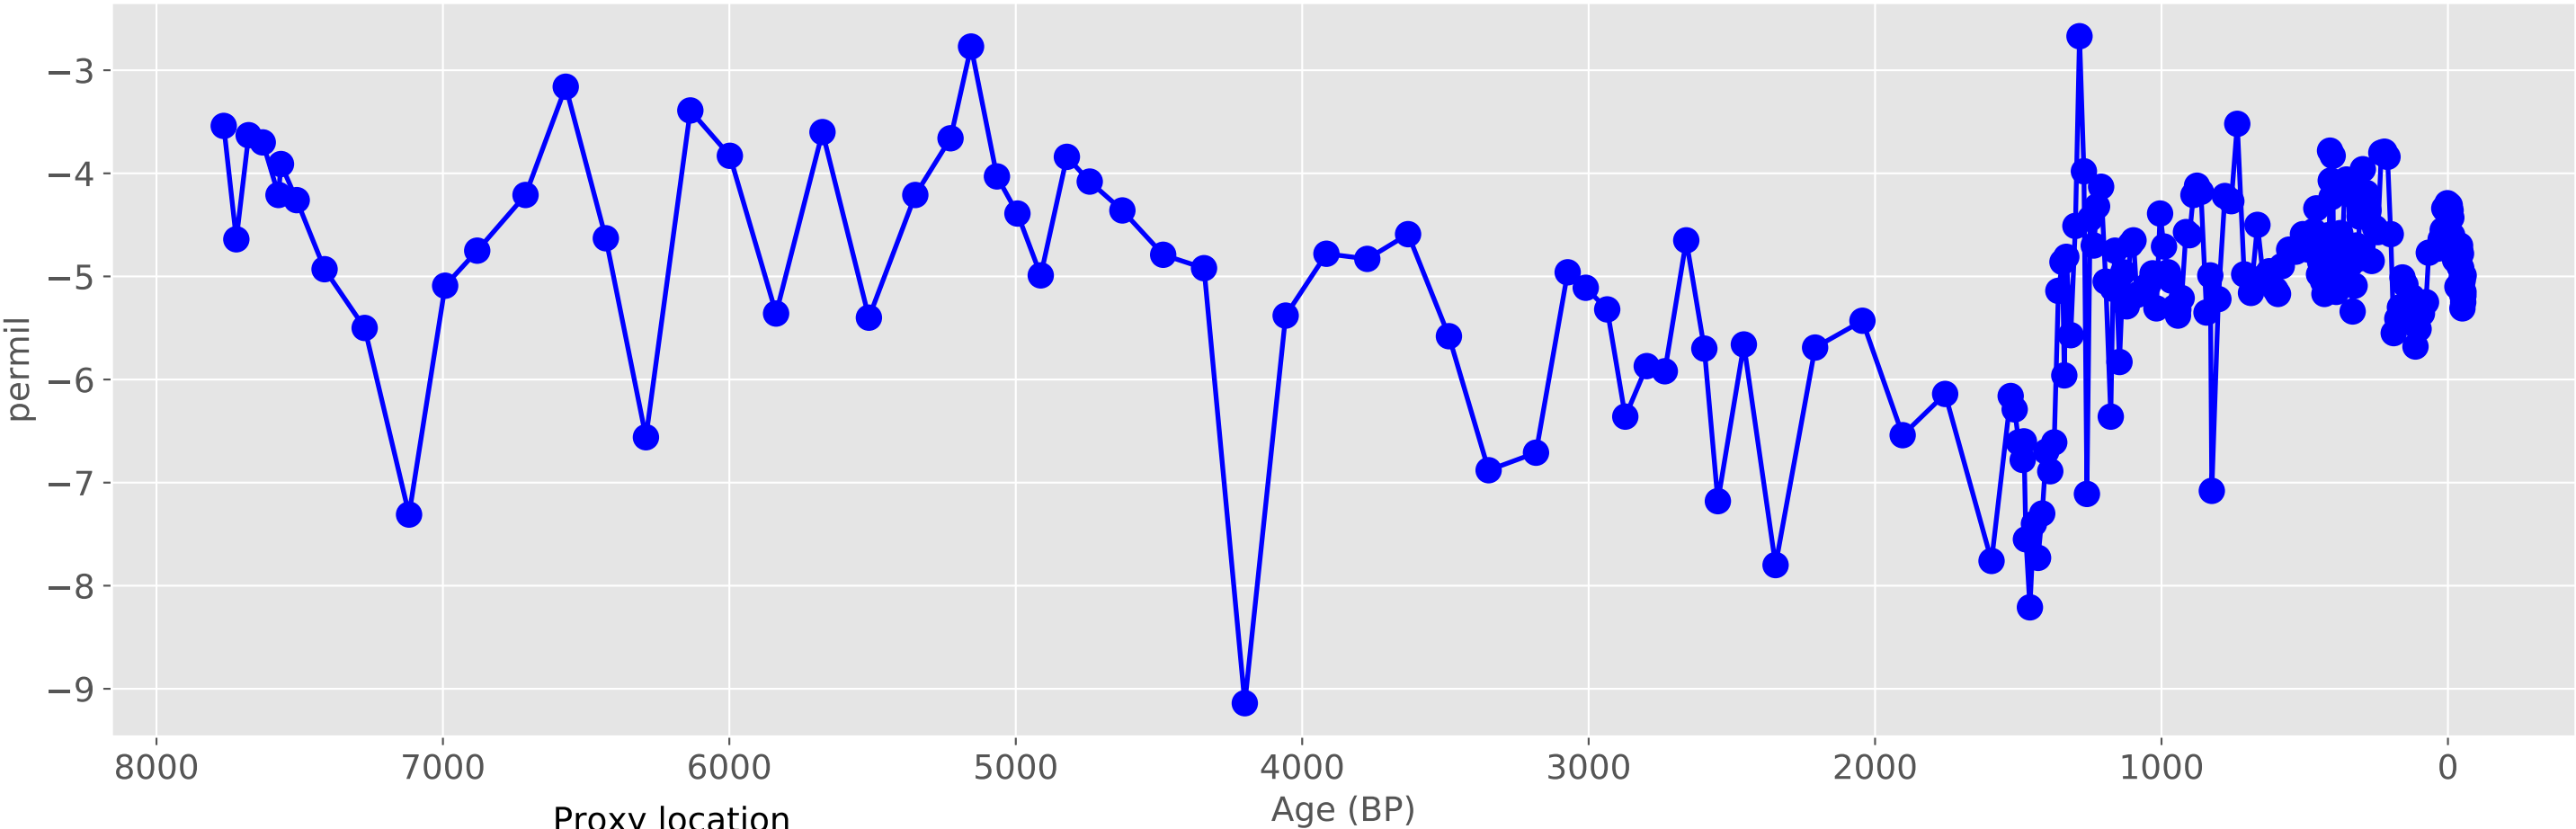

Proxy location  
(48.87 ° N, 117.34 ° W)

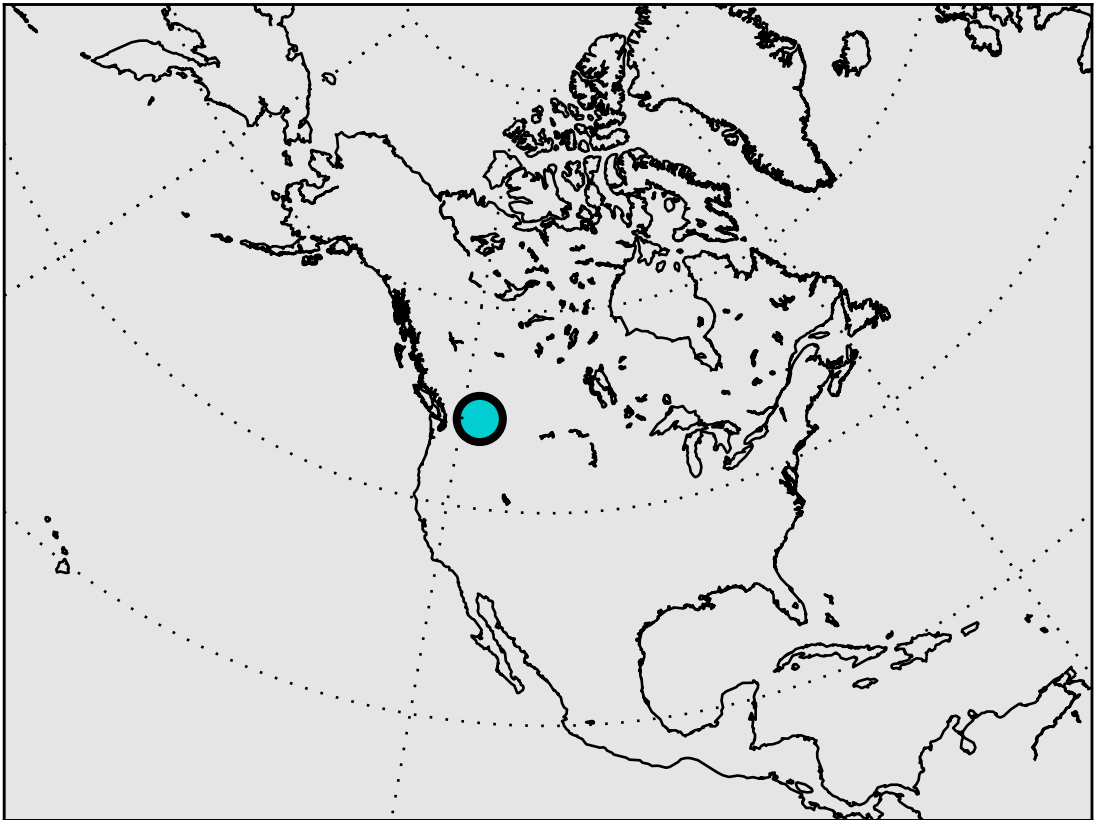

|                    |                                                       |
|--------------------|-------------------------------------------------------|
| Dataset name:      | LimeLake.Steinman.2016                                |
| Archive type:      | LakeSediment                                          |
| Proxy type:        | d13C                                                  |
| Variable name:     | d13C                                                  |
| Latitude ( ° N):   | 48.874                                                |
| Longitude ( ° E):  | -117.338                                              |
| Elevation (m):     | 781.0                                                 |
| Interp. variable:  | P-E                                                   |
| Interp. detail:    | lakeLevel@surface                                     |
| Interp. season:    | winterOnly                                            |
| Interp. direction: | negative                                              |
| Pub. 1 title:      | Oxygen isotope records of Holocene climate variabi... |
| Pub. 1 authors:    | Steinman, Byron A.;Pompeani, David P.;Abbott, Mark... |
| Pub. 1 year:       | 2016                                                  |
| Pub. 1 DOI:        | 10.1016/j.quascirev.2016.04.012                       |
| Original data URL: | www.ncdc.noaa.gov/paleo/study/21250                   |

Proxy data and metadata  
**LakeSediment | d18O | MeliLake.Anderson.2001 | WEBe0e75109**

Proxy time series: d18O

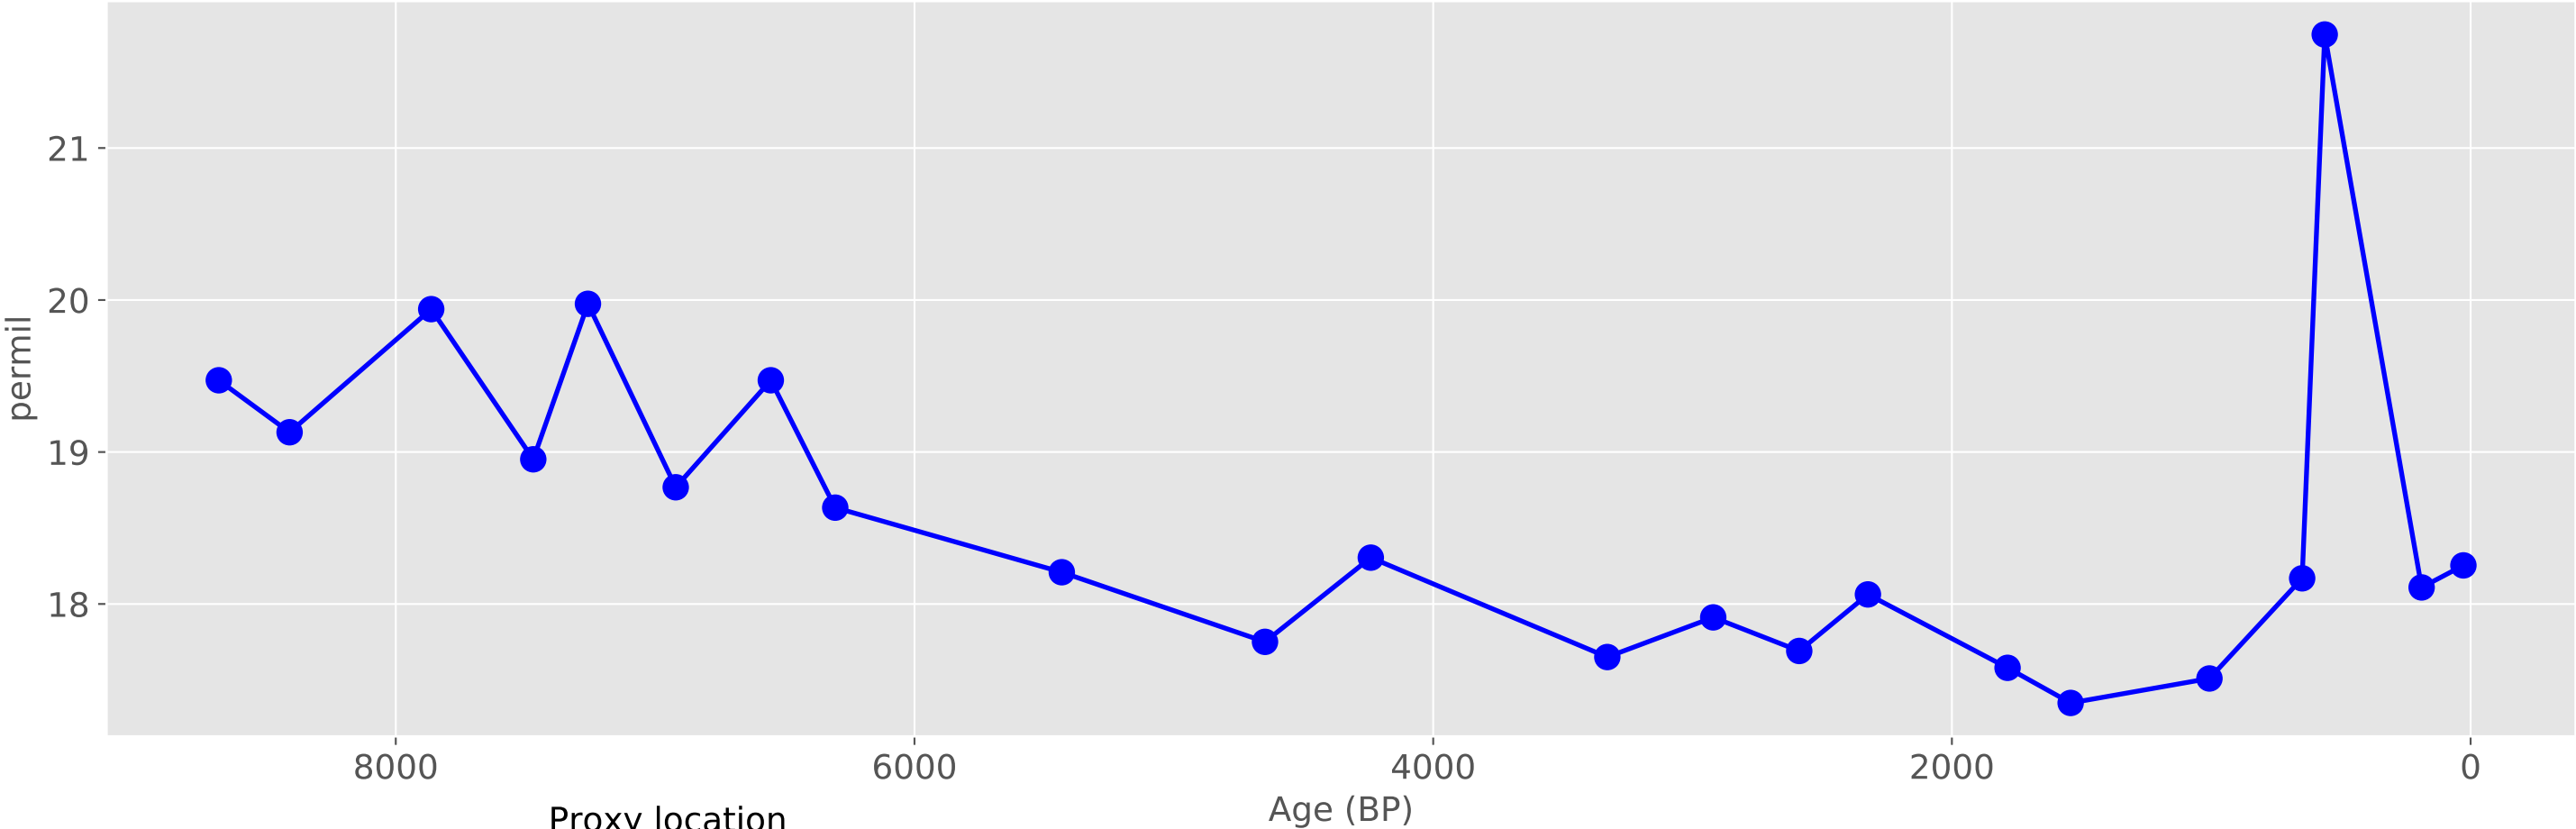

Proxy location  
(68.68 ° N, 149.07 ° W)

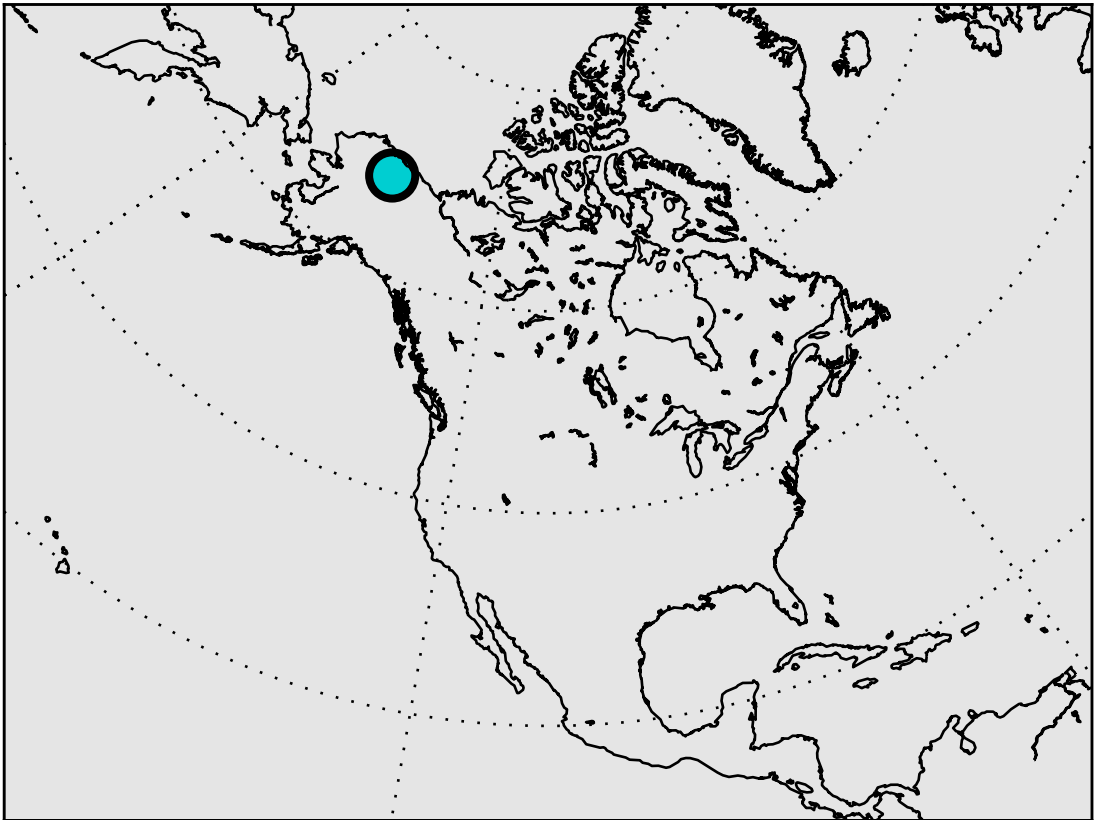

|                    |                                                       |
|--------------------|-------------------------------------------------------|
| Dataset name:      | MeliLake.Anderson.2001                                |
| Archive type:      | LakeSediment                                          |
| Proxy type:        | d18O                                                  |
| Variable name:     | d18O                                                  |
| Latitude ( ° N):   | 68.6836                                               |
| Longitude ( ° E):  | -149.075                                              |
| Elevation (m):     | 741.0                                                 |
| Interp. variable:  | P-E                                                   |
| Interp. detail:    | lake@surface                                          |
| Interp. season:    | annual                                                |
| Interp. direction: | negative                                              |
| Pub. 1 title:      | Holocene climate inferred from oxygen isotope rati... |
| Pub. 1 authors:    | Anderson, Lesleigh; Abbott, Mark B.; Finney, Bruce... |
| Pub. 1 year:       | 2001                                                  |
| Pub. 1 DOI:        | 10.1006/qres.2001.2219                                |
| Original data URL: | www.ncdc.noaa.gov/paleo/study/5469                    |



Proxy data and metadata

LakeSediment | d18O | TangledUpLake.Anderson.2001 | WEBb9f39481

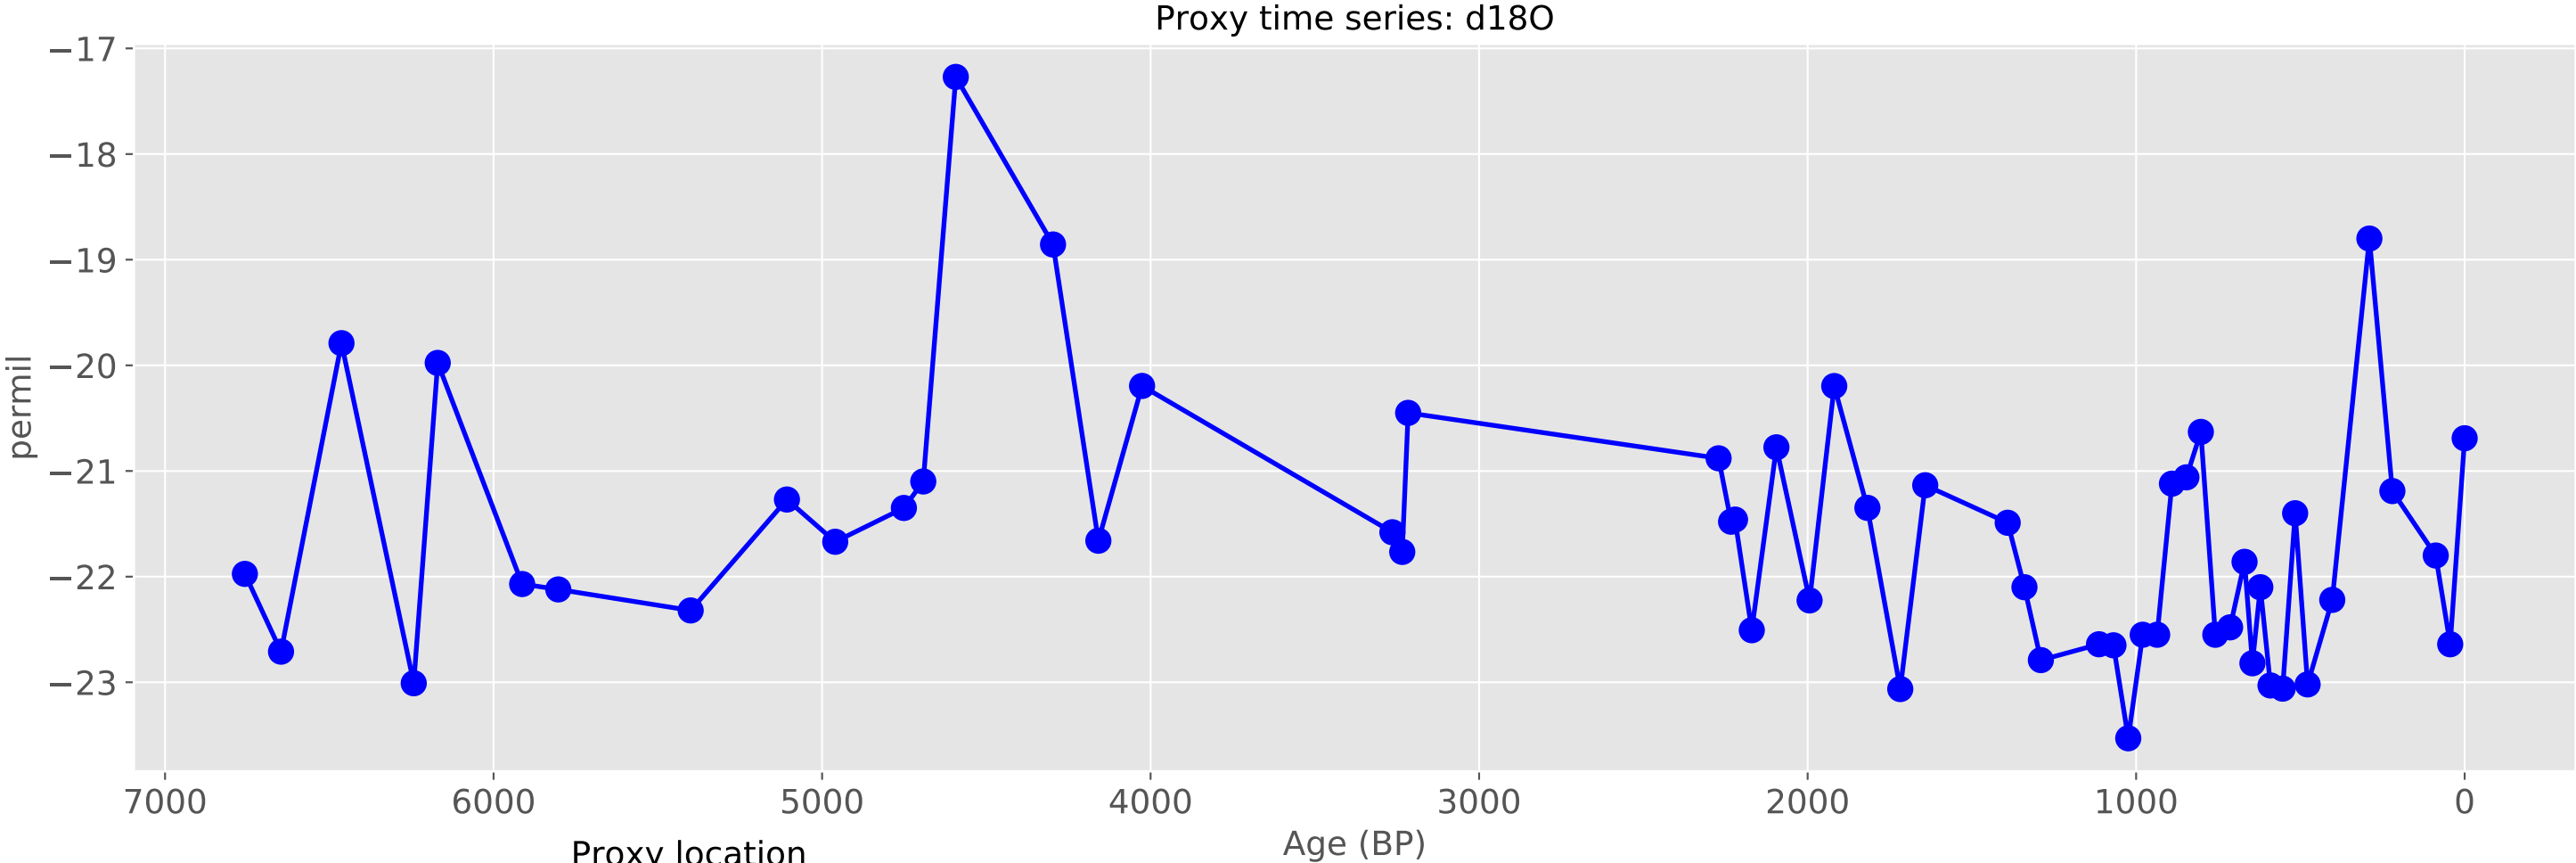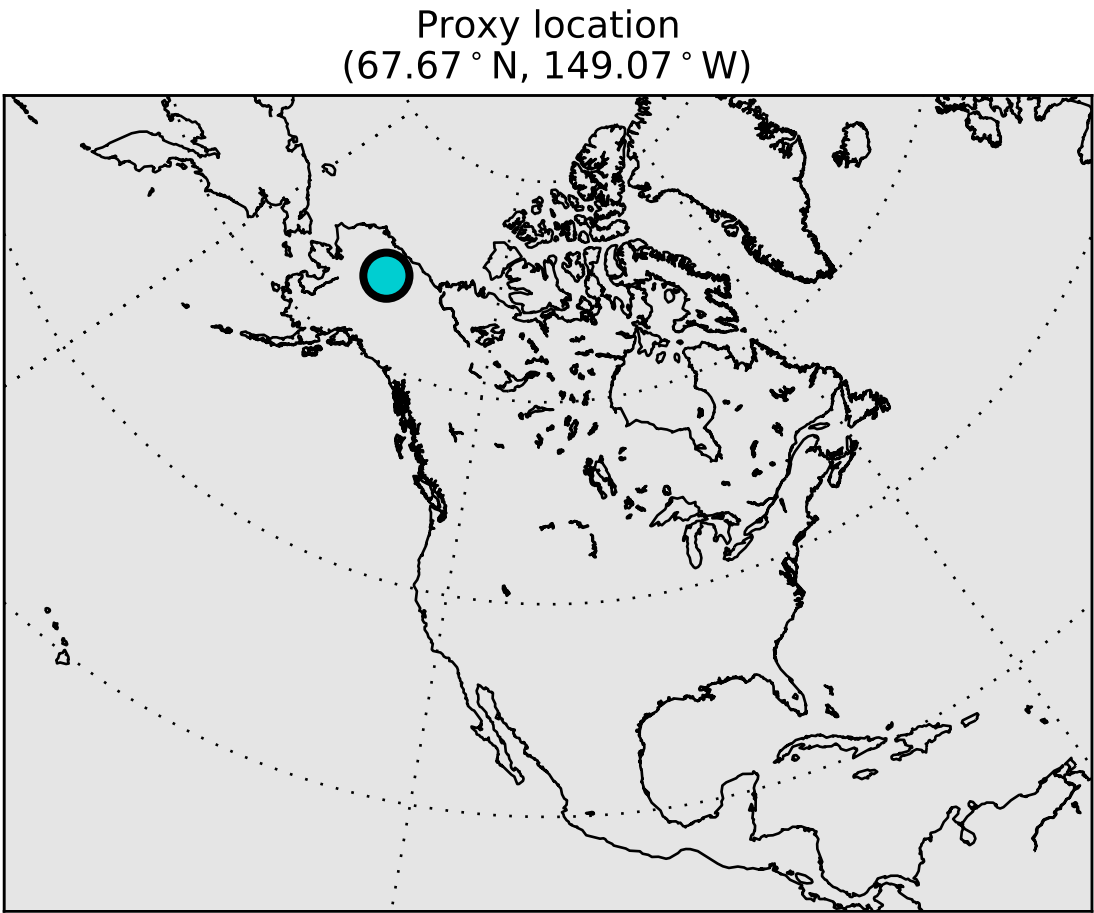

|                    |                                                       |
|--------------------|-------------------------------------------------------|
| Dataset name:      | TangledUpLake.Anderson.2001                           |
| Archive type:      | LakeSediment                                          |
| Proxy type:        | d18O                                                  |
| Variable name:     | d18O                                                  |
| Latitude ( ° N):   | 67.6667                                               |
| Longitude ( ° E):  | -149.075                                              |
| Elevation (m):     | 440.0                                                 |
| Interp. variable:  | T                                                     |
| Interp. detail:    | air@surface                                           |
| Interp. season:    | summerOnly                                            |
| Interp. direction: | positive                                              |
| Pub. 1 title:      | Holocene climate inferred from oxygen isotope rati... |
| Pub. 1 authors:    | Anderson, Lesleigh; Abbott, Mark B.; Finney, Bruce... |
| Pub. 1 year:       | 2001                                                  |
| Pub. 1 DOI:        | 10.1006/qres.2001.2219                                |
| Original data URL: | www.ncdc.noaa.gov/paleo/study/5469                    |

Proxy data and metadata  
LakeSediment | d18O | Takahula.Clegg.2010 | GH2f86466e

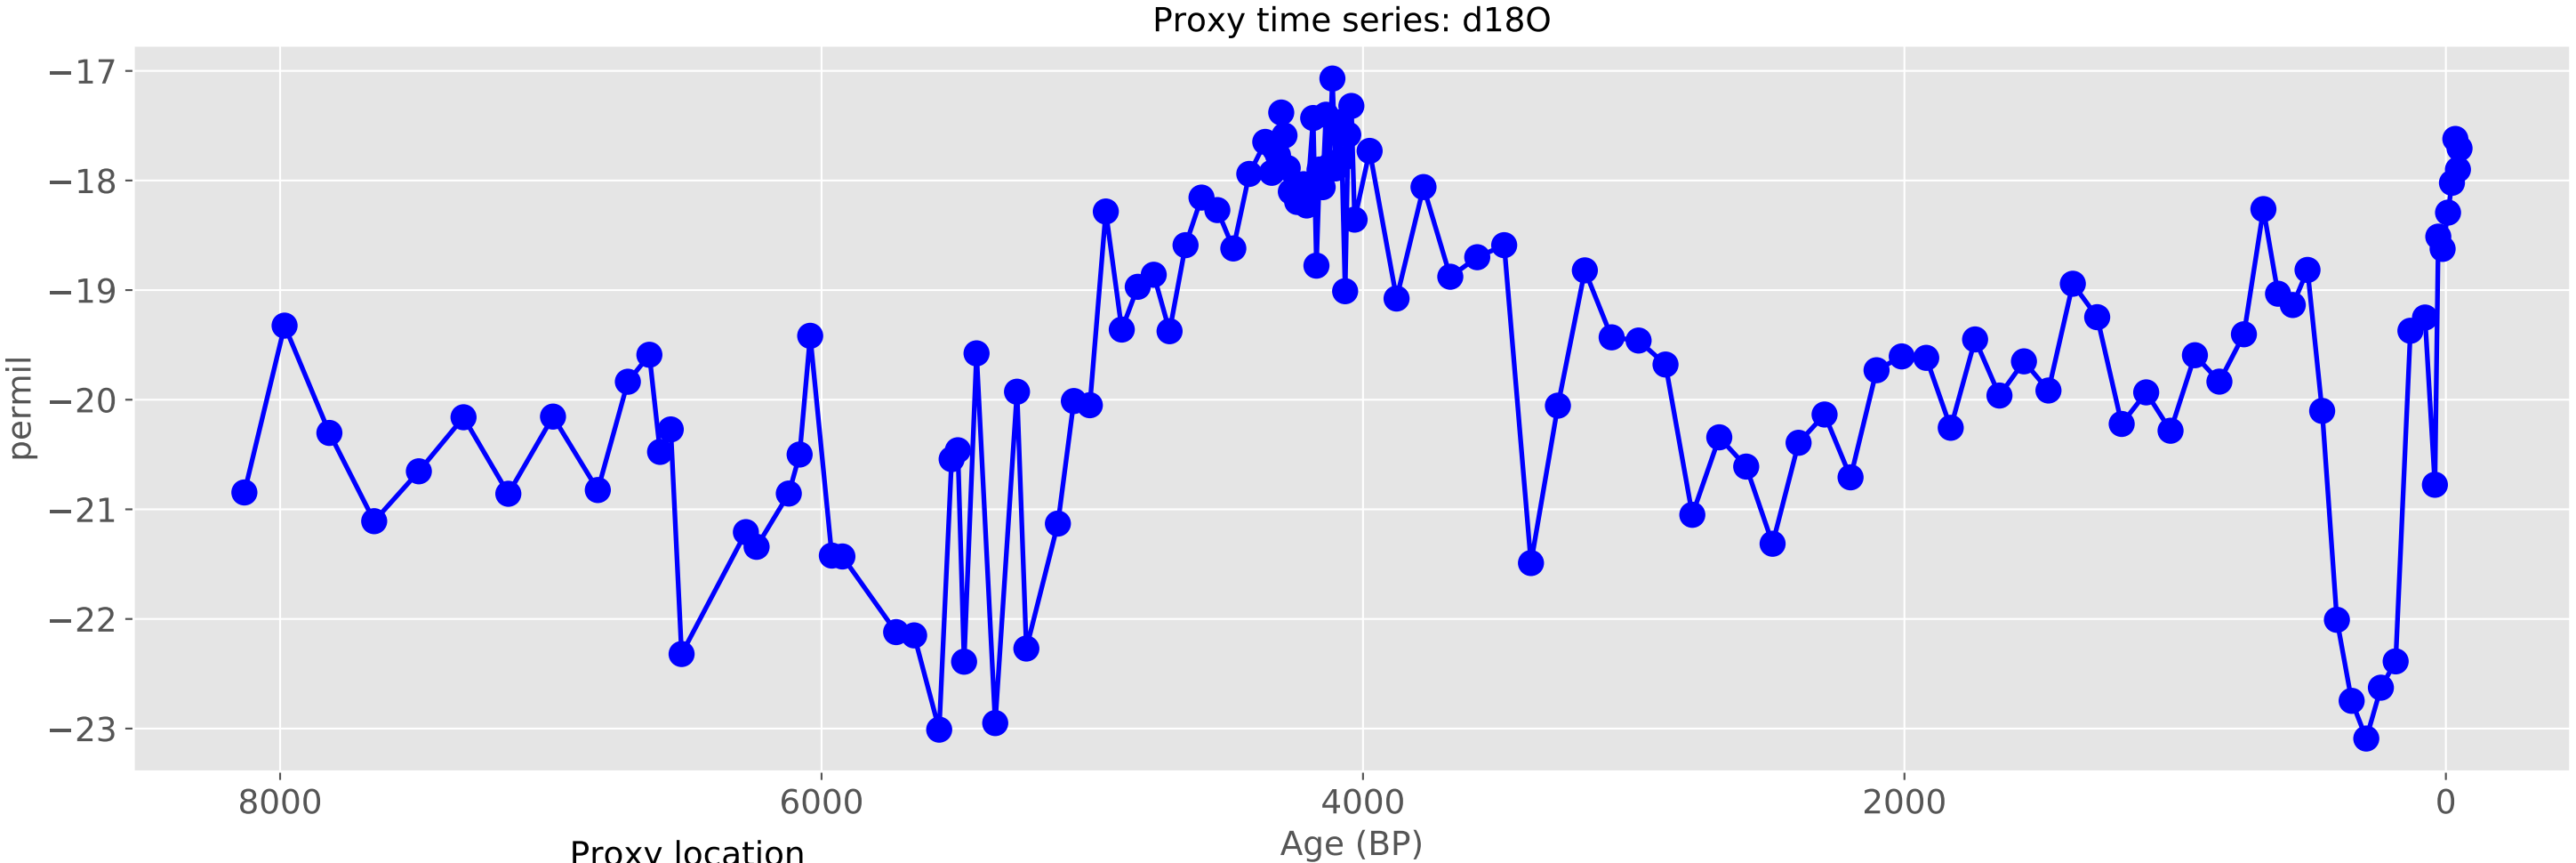

Proxy location  
(67.35 ° N, 153.67 ° W)

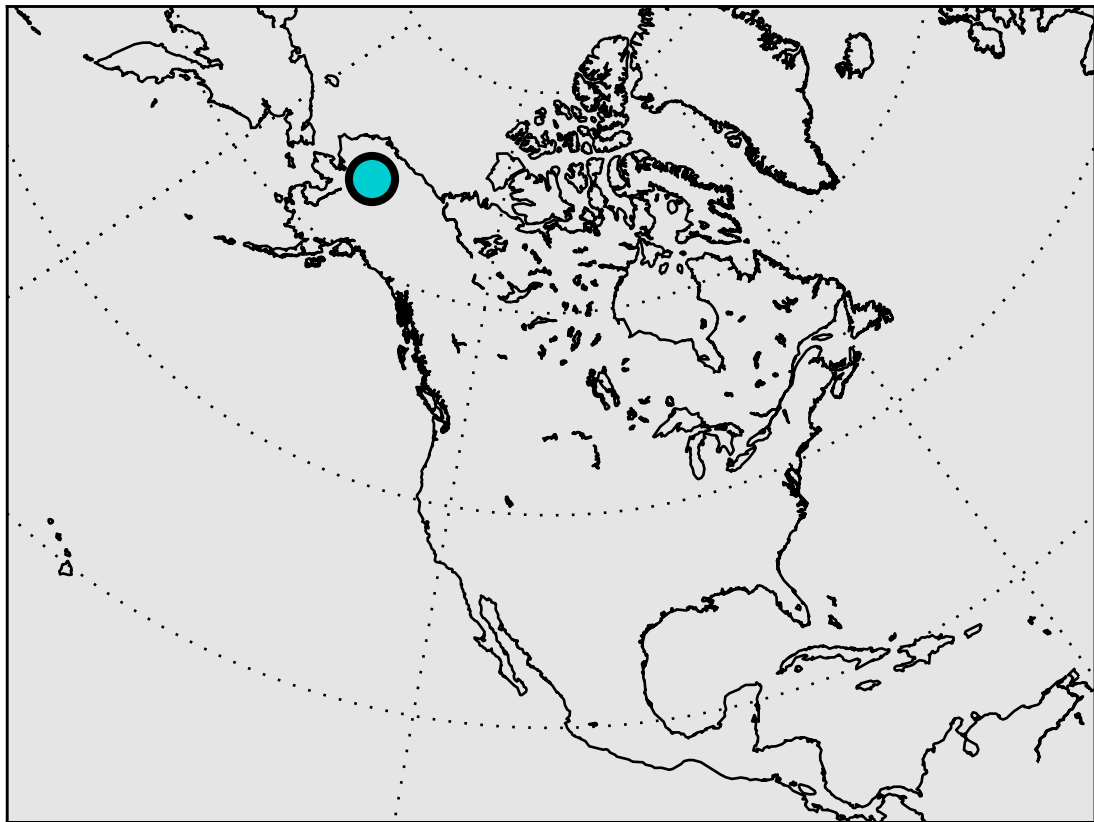

|                    |                                                       |
|--------------------|-------------------------------------------------------|
| Dataset name:      | Takahula.Clegg.2010                                   |
| Archive type:      | LakeSediment                                          |
| Proxy type:        | d18O                                                  |
| Variable name:     | d18O                                                  |
| Latitude ( ° N):   | 67.35                                                 |
| Longitude ( ° E):  | -153.6667                                             |
| Elevation (m):     | 275.0                                                 |
| Interp. variable:  | P-E                                                   |
| Interp. detail:    | lake@surface                                          |
| Interp. season:    | annual                                                |
| Interp. direction: | negative                                              |
| Pub. 1 title:      | An oxygen-isotope record of Holocene climate chang... |
| Pub. 1 authors:    | Clegg, Benjamin F.;Hu, Feng Sheng                     |
| Pub. 1 year:       | 2010                                                  |
| Pub. 1 DOI:        | 10.1016/j.quascirev.2009.12.009                       |
| Original data URL: | www.ncdc.noaa.gov/paleo/study/8663                    |

Proxy data and metadata  
LakeSediment | d18O | MicaLake.Schiff.2009 | GHbe8e3d17

Proxy time series: d18O

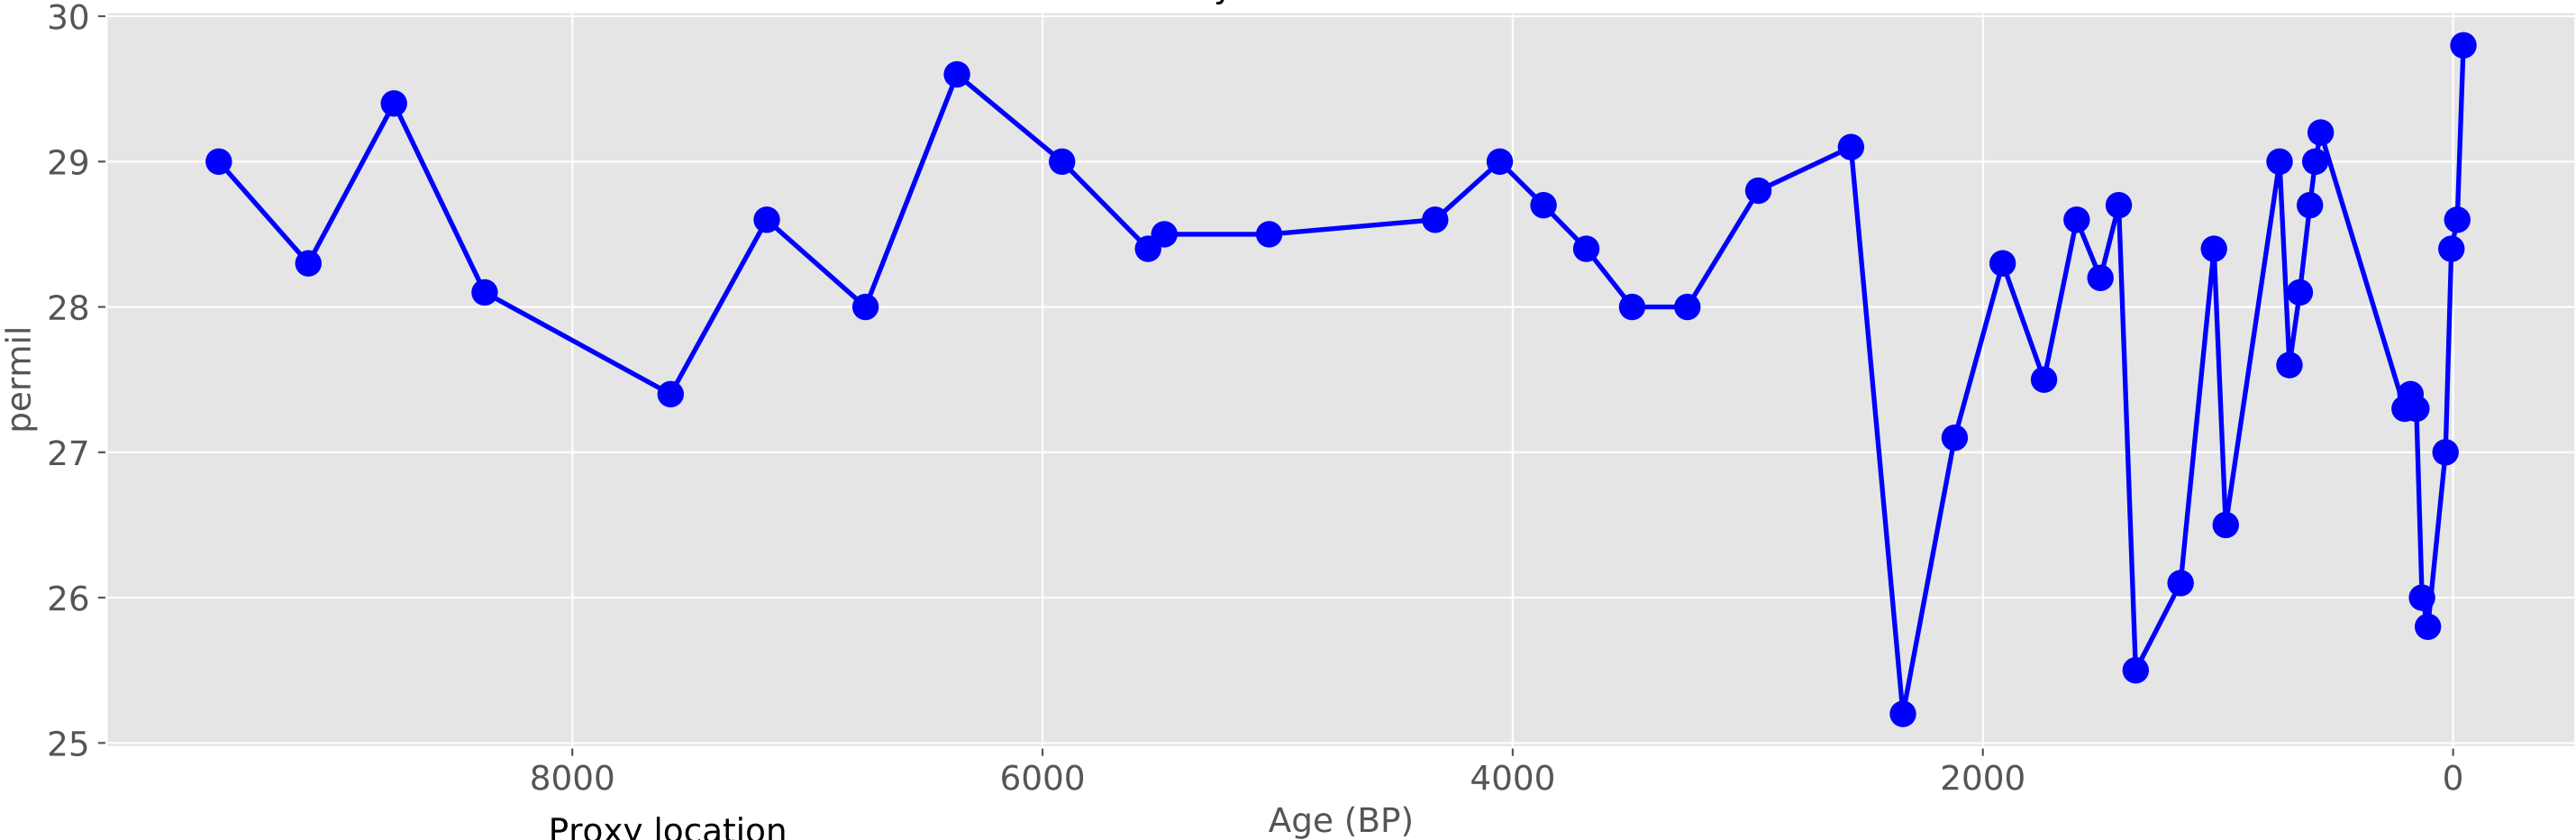

Proxy location  
(60.95 ° N, 148.15 ° W)

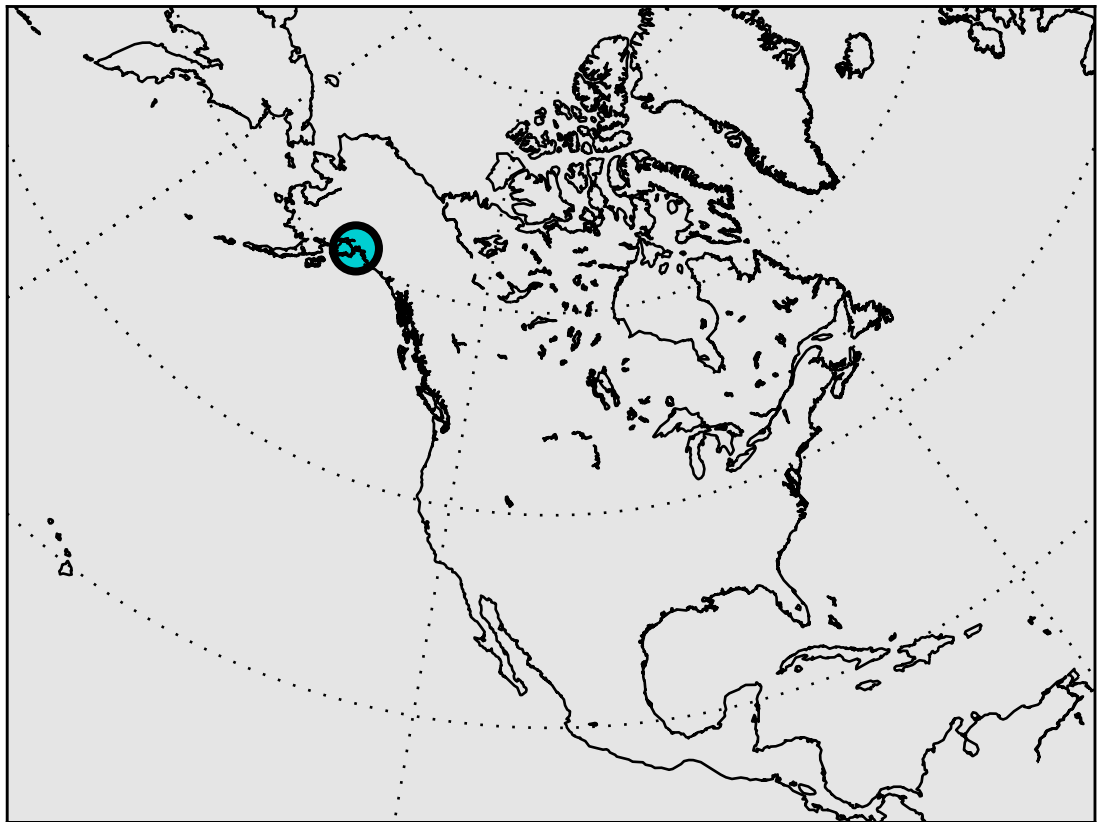

|                    |                                                       |
|--------------------|-------------------------------------------------------|
| Dataset name:      | MicaLake.Schiff.2009                                  |
| Archive type:      | LakeSediment                                          |
| Proxy type:        | d18O                                                  |
| Variable name:     | d18O                                                  |
| Latitude ( ° N):   | 60.95                                                 |
| Longitude ( ° E):  | -148.15                                               |
| Elevation (m):     | 3.0                                                   |
| Interp. variable:  | MODE                                                  |
| Interp. detail:    | aleutianLow                                           |
| Interp. season:    | winterOnly                                            |
| Interp. direction: | positive                                              |
| Pub. 1 title:      | Late Holocene storm-trajectory changes inferred fr... |
| Pub. 1 authors:    | Schiff, Caleb J.;Kaufman, Darrell S.;Wolfe, Alexan... |
| Pub. 1 year:       | 2009                                                  |
| Pub. 1 DOI:        | 10.1007/s10933-008-9261-z                             |
| Original data URL: | www.ncdc.noaa.gov/paleo/study/6202                    |

Proxy data and metadata  
LakeSediment | d18O | Jellybean.Anderson.2005 | GHe9193cd5

Proxy time series: d18O

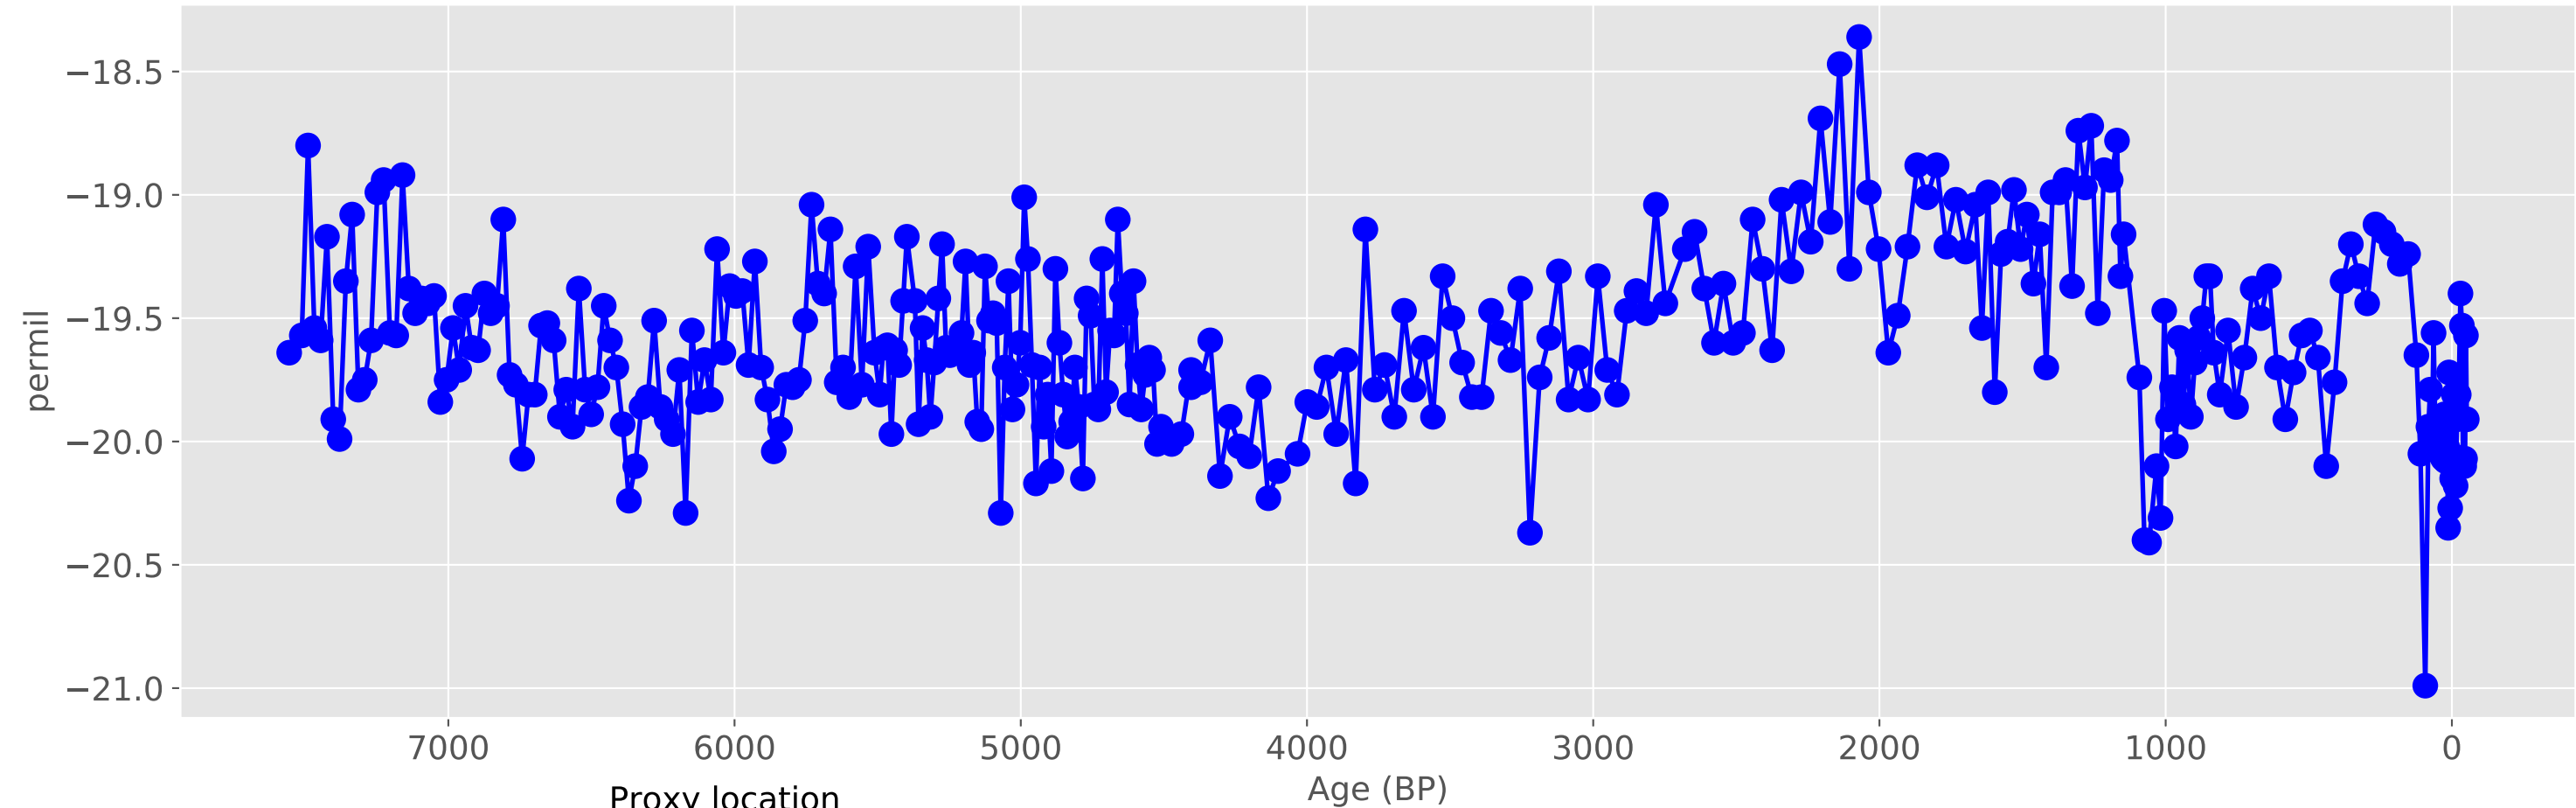

Proxy location  
(60.35 ° N, 134.80 ° W)

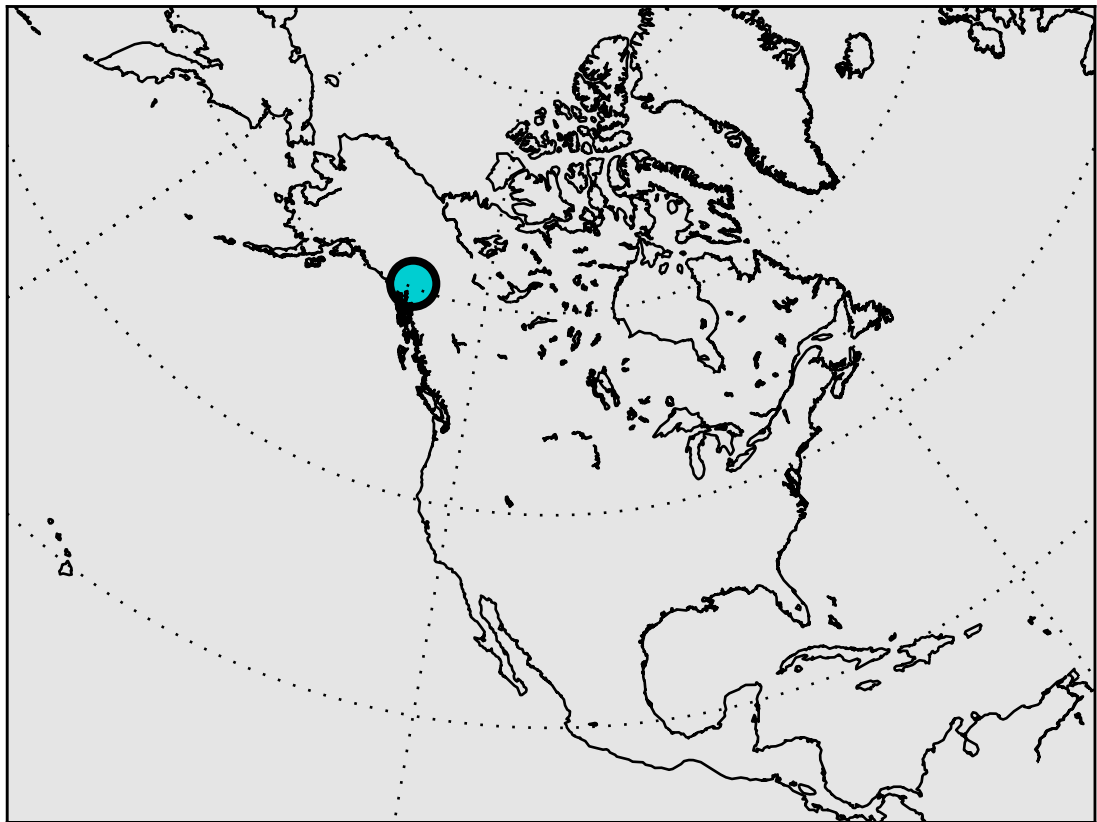

|                    |                                                                                            |
|--------------------|--------------------------------------------------------------------------------------------|
| Dataset name:      | Jellybean.Anderson.2005                                                                    |
| Archive type:      | LakeSediment                                                                               |
| Proxy type:        | d18O                                                                                       |
| Variable name:     | d18O                                                                                       |
| Latitude ( ° N):   | 60.35                                                                                      |
| Longitude ( ° E):  | -134.8                                                                                     |
| Elevation (m):     | 730.0                                                                                      |
| Interp. variable:  | MODE                                                                                       |
| Interp. detail:    | aleutianLow                                                                                |
| Interp. season:    | winterOnly                                                                                 |
| Interp. direction: | negative                                                                                   |
| Pub. 1 title:      | Regional atmospheric circulation change in the Nor...                                      |
| Pub. 1 authors:    | Anderson, Lesleigh;Abbott, Mark B.;Finney, Bruce P...                                      |
| Pub. 1 year:       | 2005                                                                                       |
| Pub. 1 DOI:        | 10.1016/j.yqres.2005.03.005                                                                |
| Original data URL: | <a href="http://www.ncdc.noaa.gov/paleo/study/5445">www.ncdc.noaa.gov/paleo/study/5445</a> |

Proxy data and metadata  
LakeSediment | d18O | Marcella.Anderson.2007 | LPD43c710a2

Proxy time series: d18O

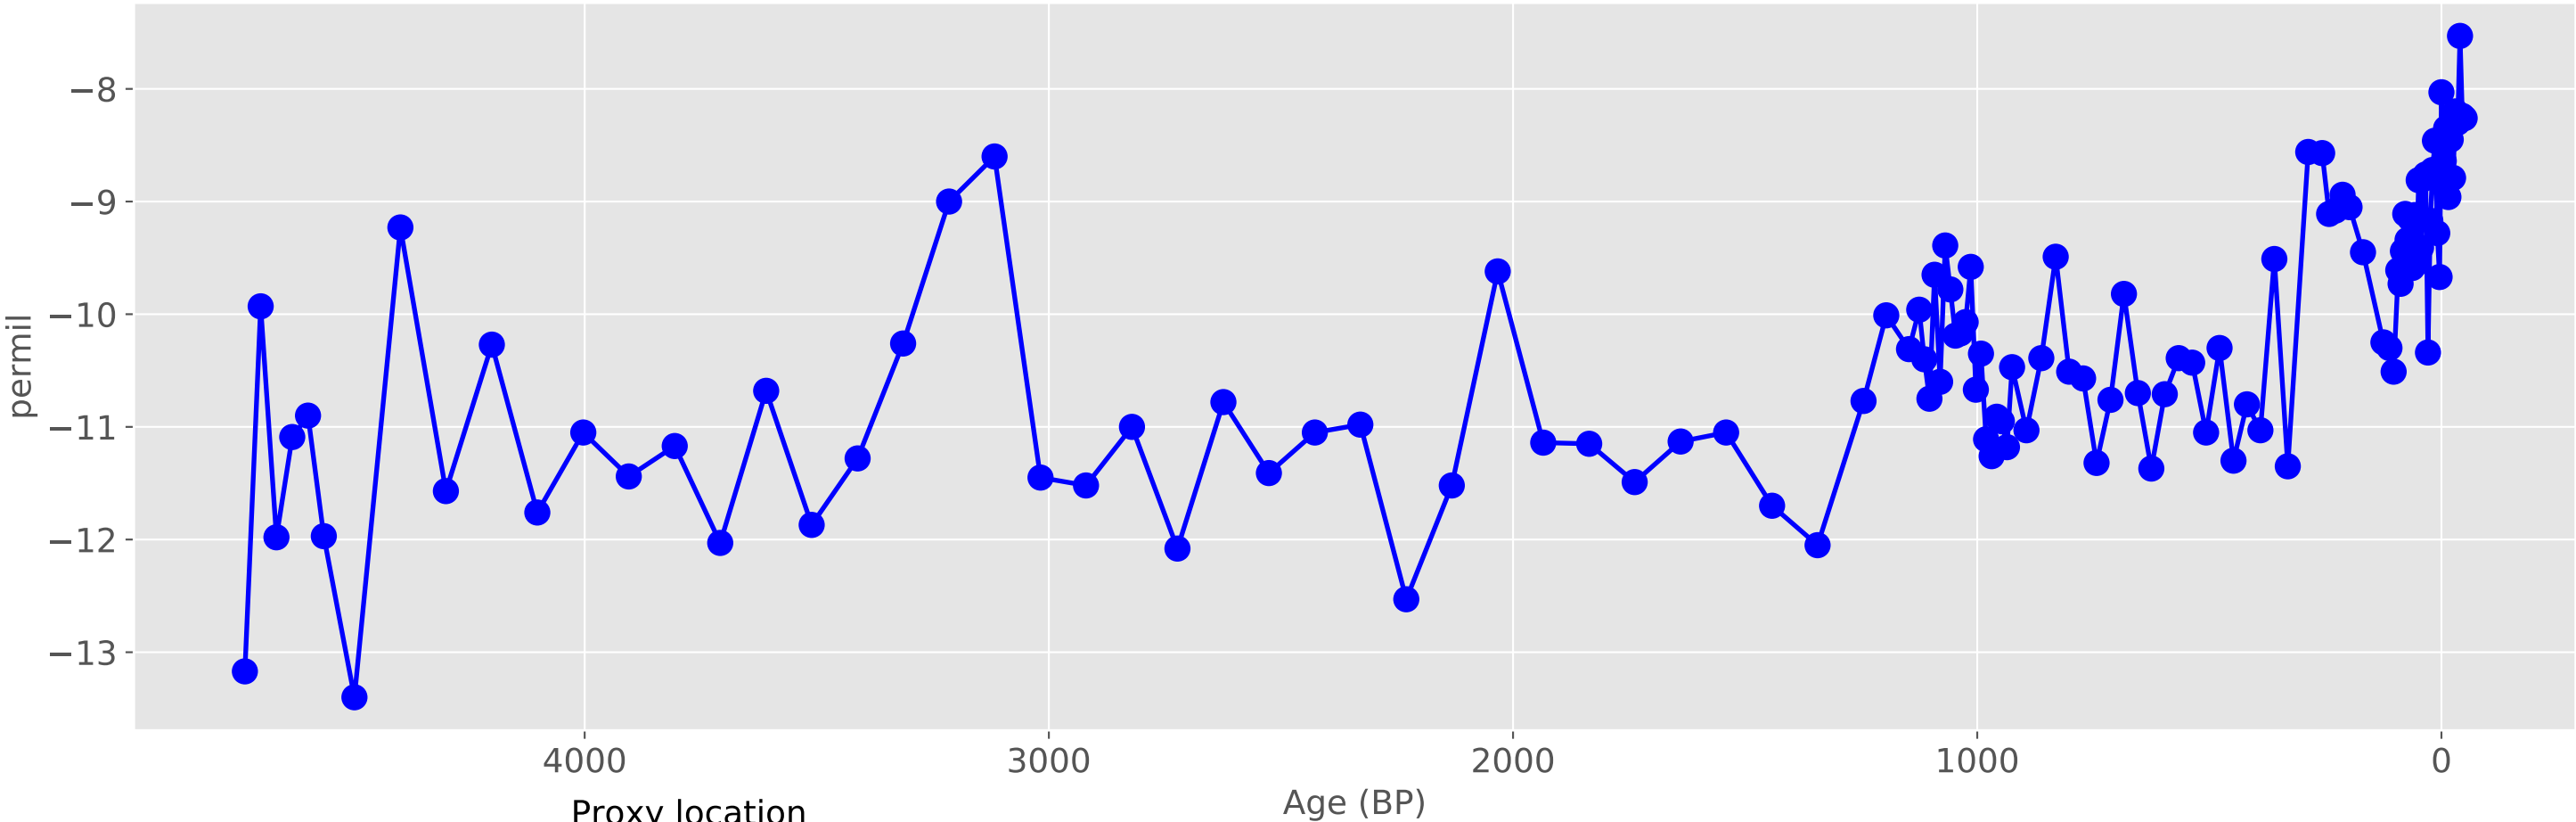

Proxy location  
(60.07 ° N, 133.81 ° W)

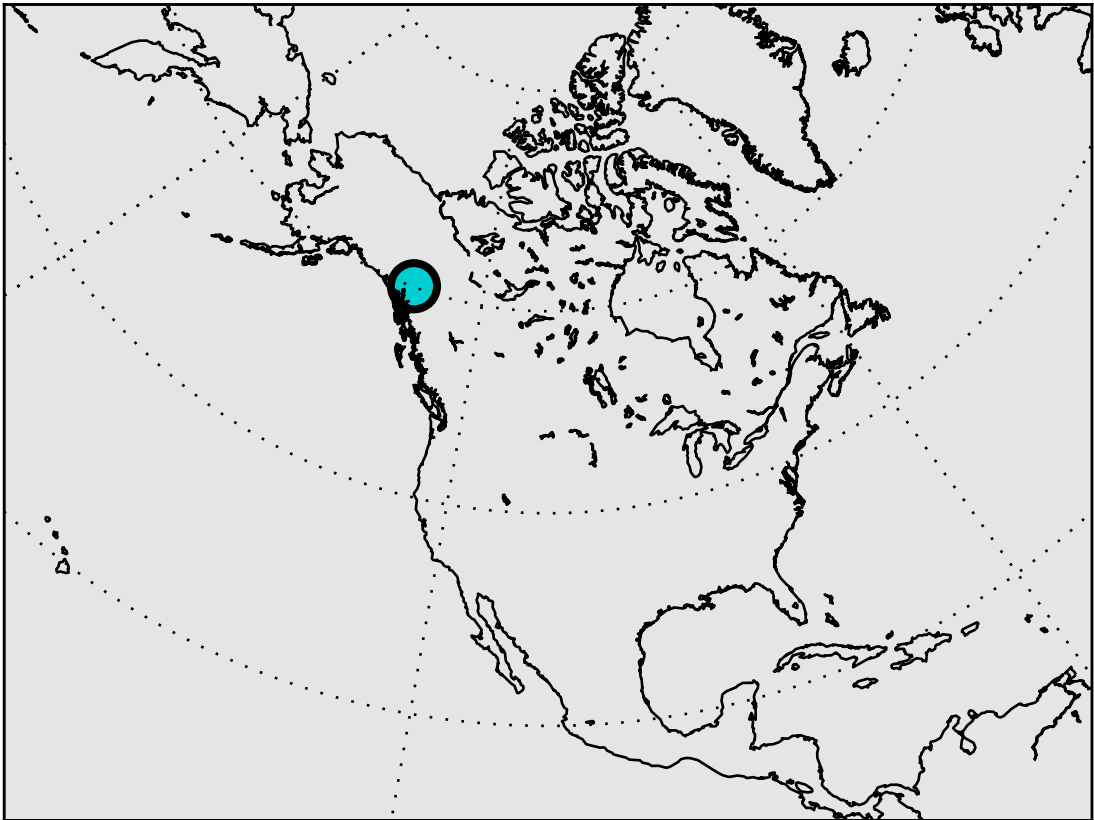

|                    |                                                       |
|--------------------|-------------------------------------------------------|
| Dataset name:      | Marcella.Anderson.2007                                |
| Archive type:      | LakeSediment                                          |
| Proxy type:        | d18O                                                  |
| Variable name:     | d18O                                                  |
| Latitude ( ° N):   | 60.0733                                               |
| Longitude ( ° E):  | -133.8055                                             |
| Elevation (m):     | 749.0                                                 |
| Interp. variable:  | P-E                                                   |
| Interp. detail:    | lake@surface                                          |
| Interp. season:    | summerOnly                                            |
| Interp. direction: | negative                                              |
| Pub. 1 title:      | Late Holocene moisture balance variability in the ... |
| Pub. 1 authors:    | Anderson, Lesleigh;Abbott, Mark B.;Finney, Bruce P... |
| Pub. 1 year:       | 2007                                                  |
| Pub. 1 DOI:        | 10.1016/j.quascirev.2006.04.011                       |
| Original data URL: | www.ncdc.noaa.gov/paleo/study/6066                    |

Proxy data and metadata  
LakeSediment | d18O | ParadiseLake.Steinman.2016 | LPD179d915e

Proxy time series: d18O

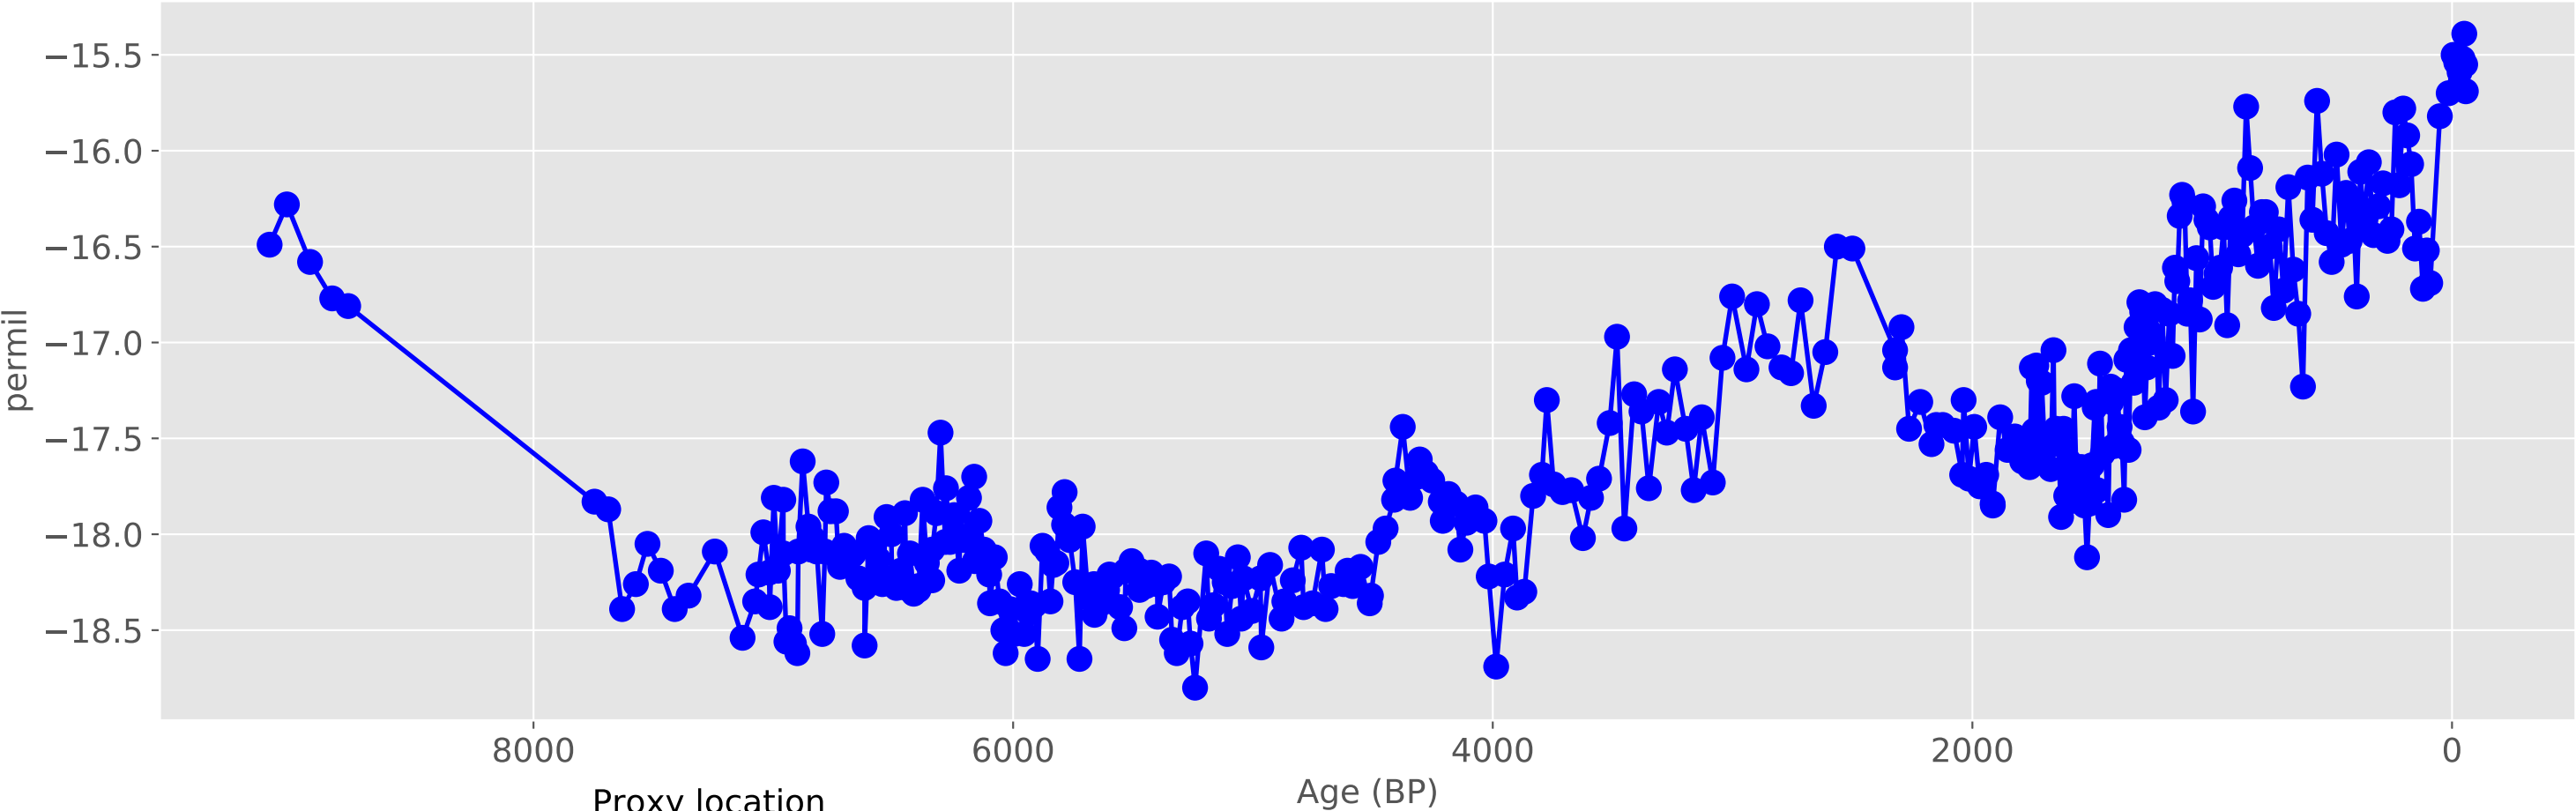

Proxy location  
(54.69 ° N, 122.62 ° W)

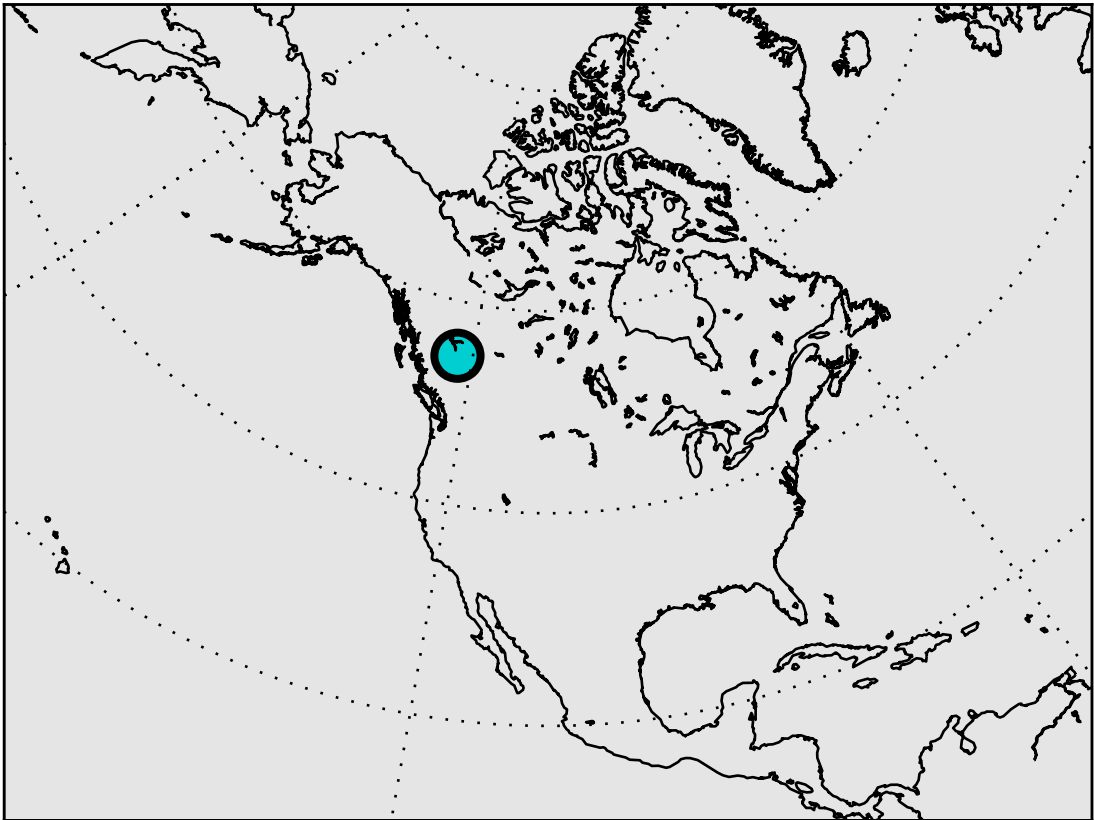

|                    |                                                                                              |
|--------------------|----------------------------------------------------------------------------------------------|
| Dataset name:      | ParadiseLake.Steinman.2016                                                                   |
| Archive type:      | LakeSediment                                                                                 |
| Proxy type:        | d18O                                                                                         |
| Variable name:     | d18O                                                                                         |
| Latitude ( ° N):   | 54.685                                                                                       |
| Longitude ( ° E):  | -122.617                                                                                     |
| Elevation (m):     | 733.0                                                                                        |
| Interp. variable:  | P-E                                                                                          |
| Interp. detail:    | lake@surface                                                                                 |
| Interp. season:    | winterOnly                                                                                   |
| Interp. direction: | negative                                                                                     |
| Pub. 1 title:      | Oxygen isotope records of Holocene climate variabi...                                        |
| Pub. 1 authors:    | Steinman, Byron A.;Pompeani, David P.;Abbott, Mark...                                        |
| Pub. 1 year:       | 2016                                                                                         |
| Pub. 1 DOI:        | 10.1016/j.quascirev.2016.04.012                                                              |
| Original data URL: | <a href="http://www.ncdc.noaa.gov/paleo/study/21250">www.ncdc.noaa.gov/paleo/study/21250</a> |



Proxy data and metadata  
LakeSediment | d18O | ClelandLake.Steinman.2016 | LPD7dc5b9ba

Proxy time series: d18O

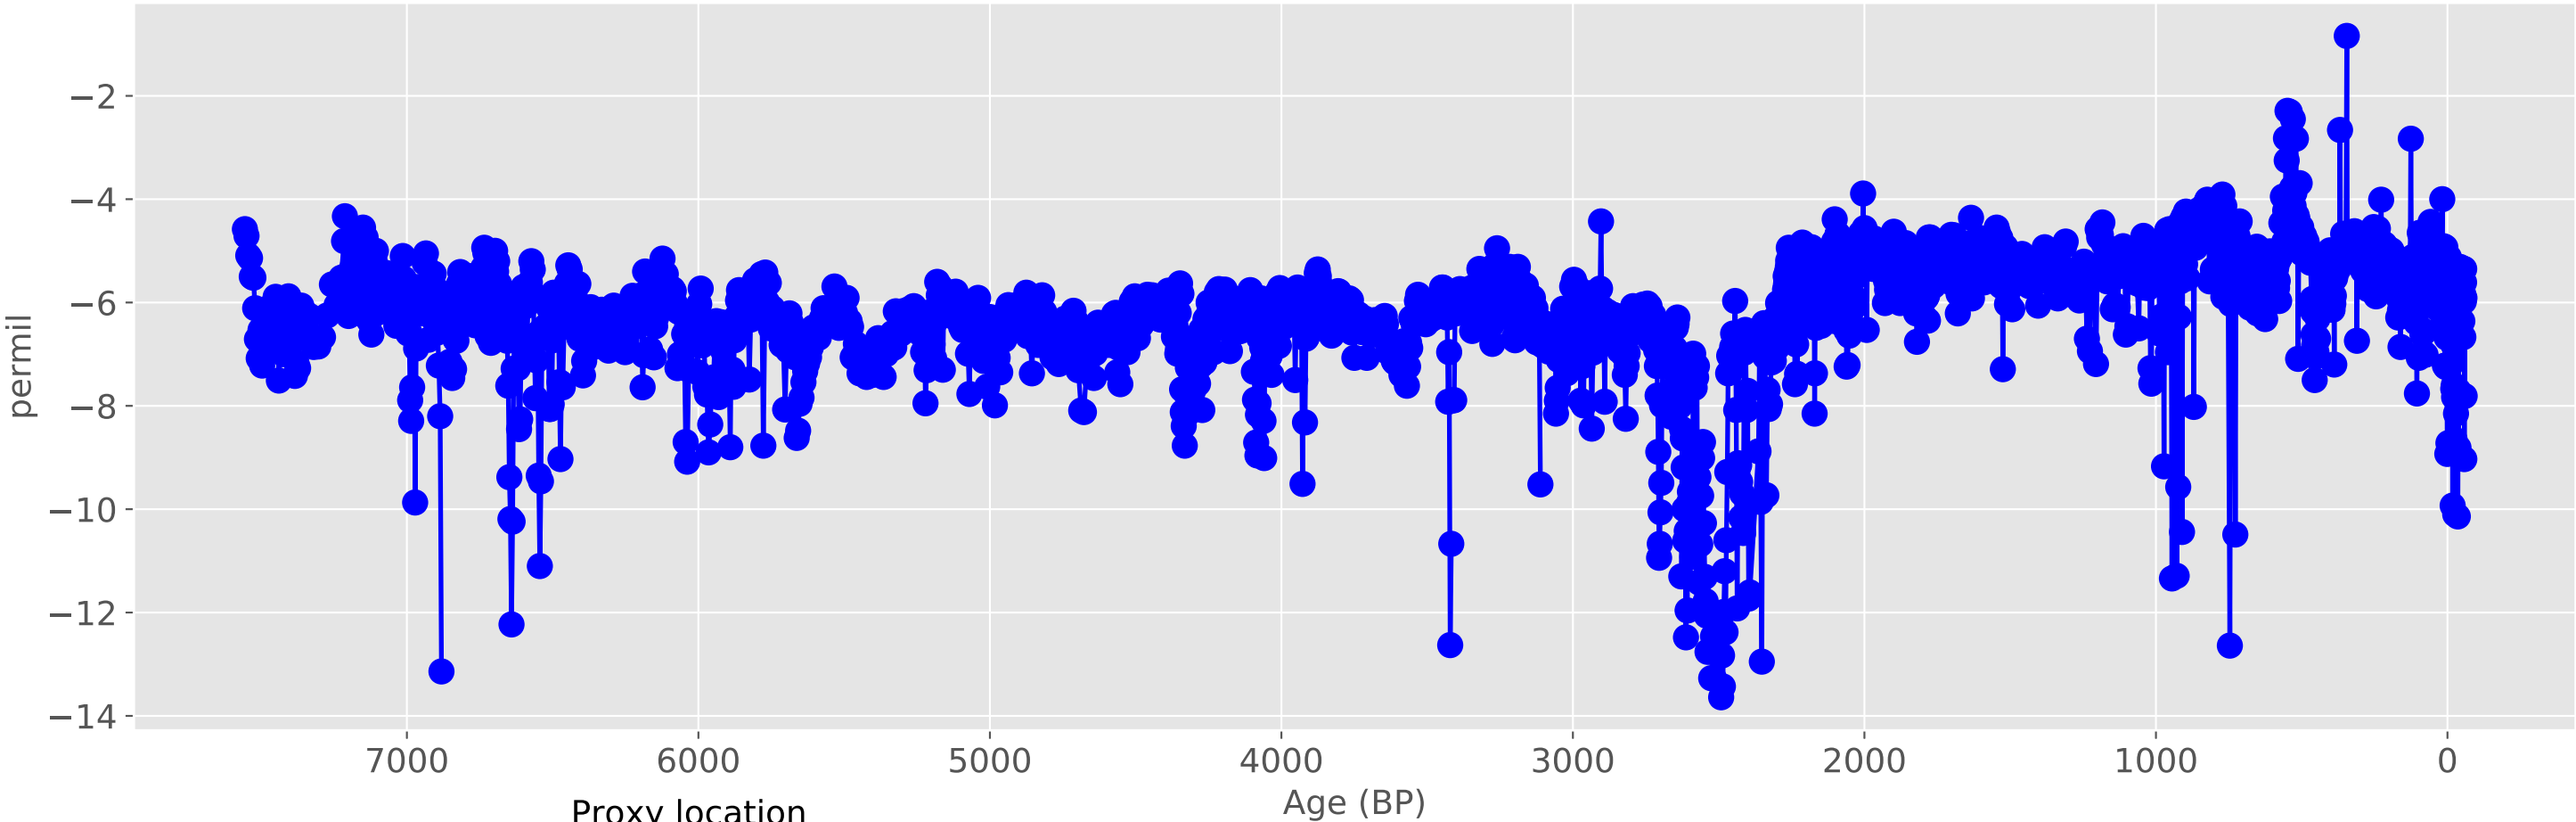

Proxy location  
(50.83 ° N, 116.39 ° W)

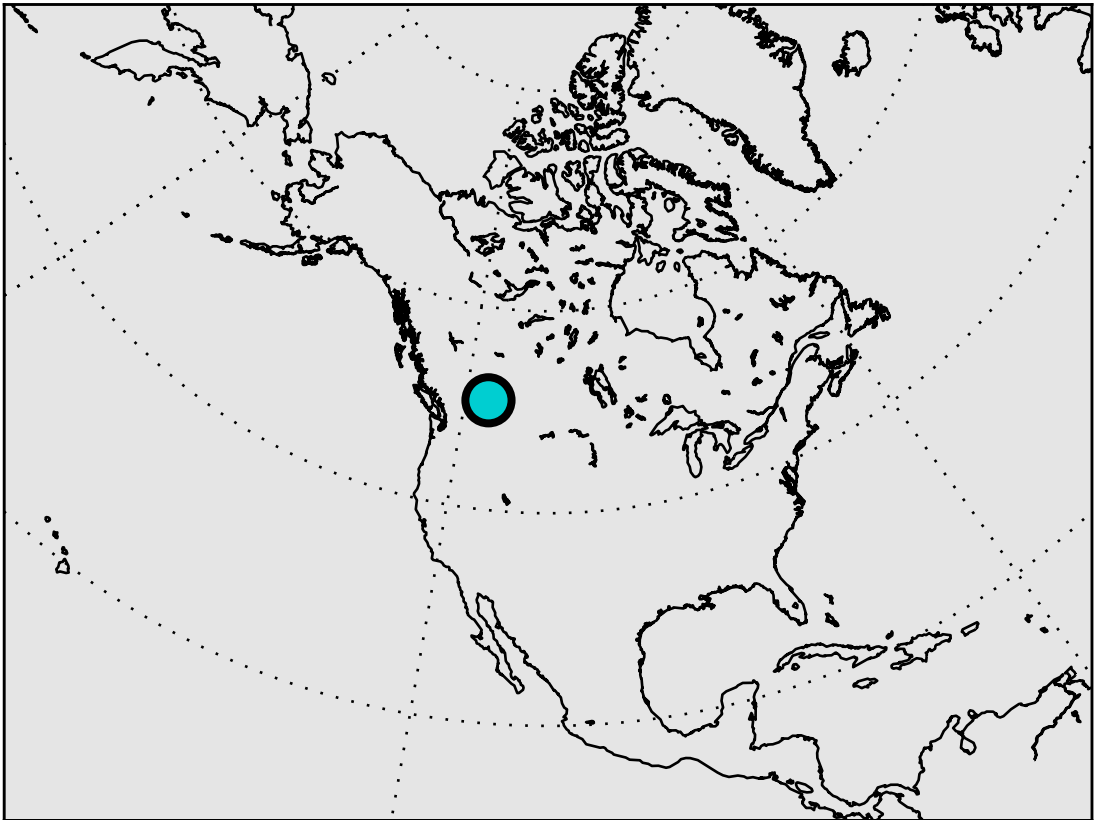

|                    |                                                                                                            |
|--------------------|------------------------------------------------------------------------------------------------------------|
| Dataset name:      | ClelandLake.Steinman.2016                                                                                  |
| Archive type:      | LakeSediment                                                                                               |
| Proxy type:        | d18O                                                                                                       |
| Variable name:     | d18O                                                                                                       |
| Latitude ( ° N):   | 50.83                                                                                                      |
| Longitude ( ° E):  | -116.39                                                                                                    |
| Elevation (m):     | 1126.0                                                                                                     |
| Interp. variable:  | P-E                                                                                                        |
| Interp. detail:    | lakeLevel@surface                                                                                          |
| Interp. season:    | winterOnly                                                                                                 |
| Interp. direction: | negative                                                                                                   |
| Pub. 1 title:      | Oxygen isotope records of Holocene climate variabi...                                                      |
| Pub. 1 authors:    | Steinman, Byron A.;Pompeani, David P.;Abbott, Mark...                                                      |
| Pub. 1 year:       | 2016                                                                                                       |
| Pub. 1 DOI:        | 10.1016/j.quascirev.2016.04.012                                                                            |
| Original data URL: | <a href="http://www.ncdc.noaa.gov/paleo-search/study/21250">www.ncdc.noaa.gov/paleo-search/study/21250</a> |

Proxy data and metadata  
**LakeSediment | d18O | LimeLake.Steinman.2016 | LPDd6c25776**

Proxy time series: d18O

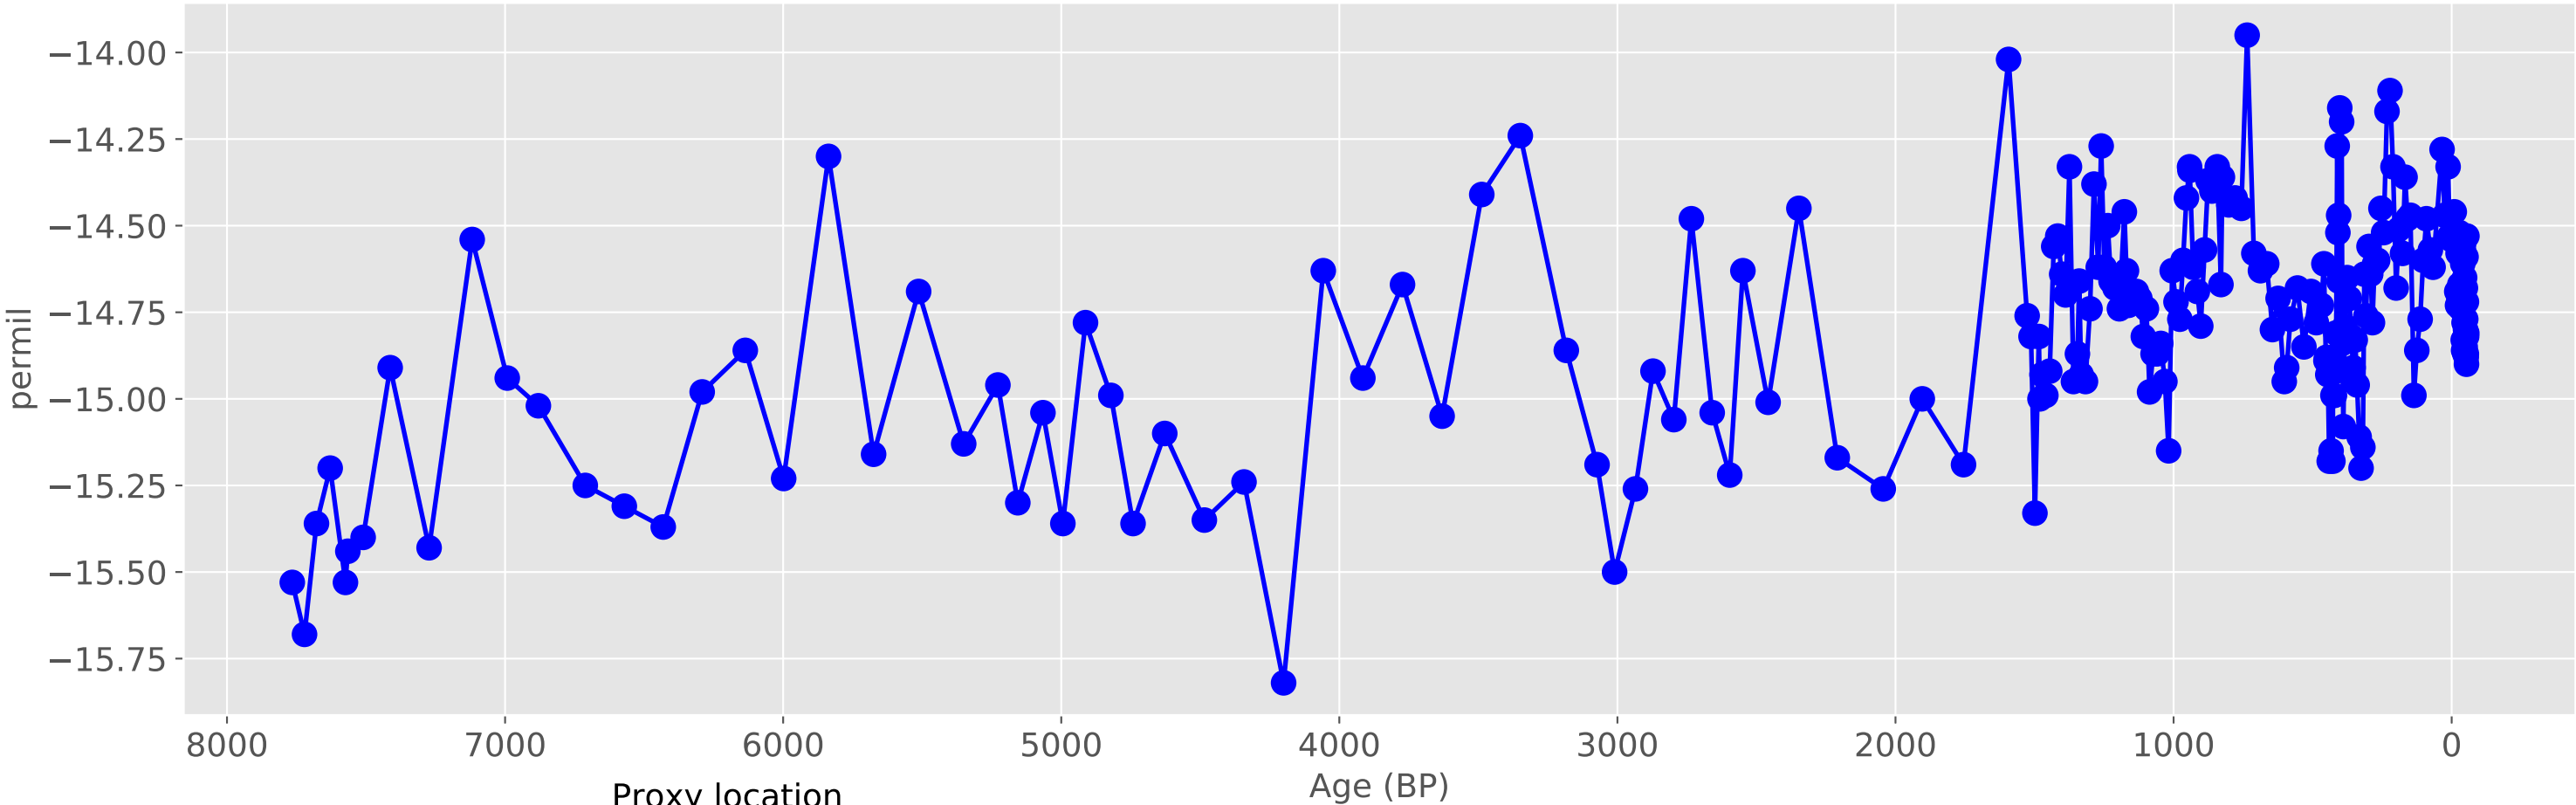

Proxy location  
(48.87° N, 117.34° W)

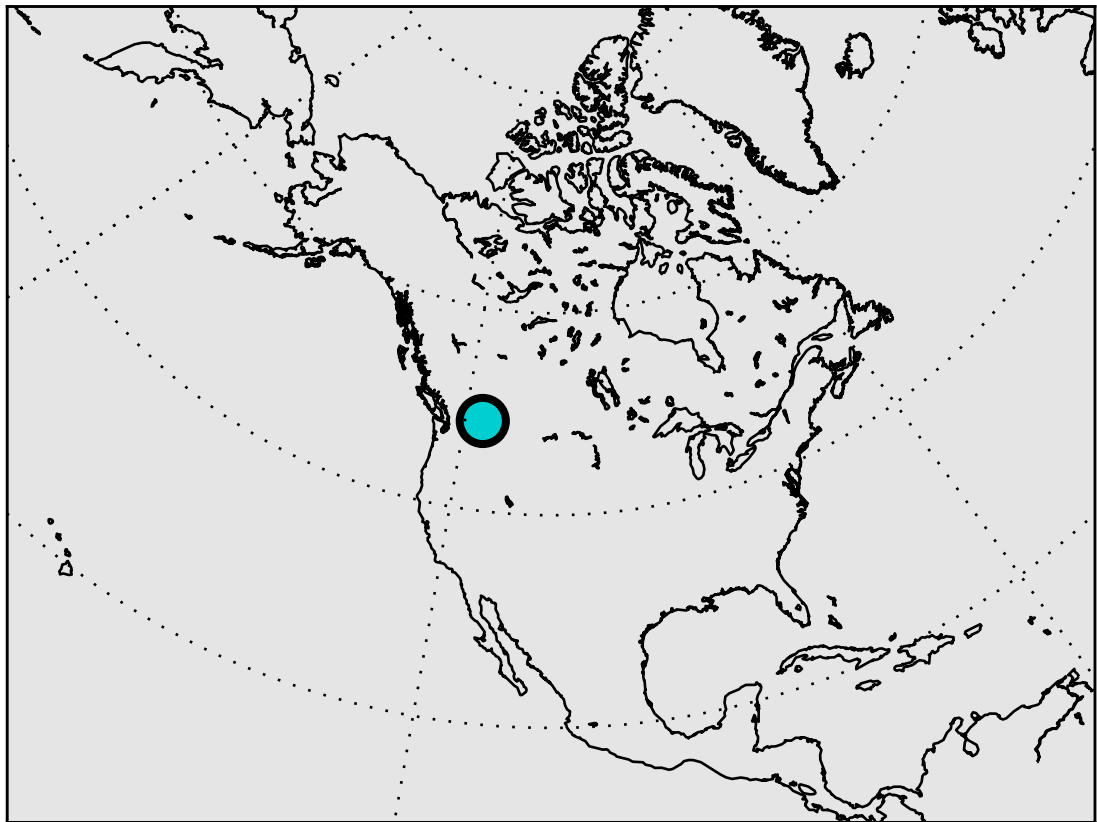

|                    |                                                       |
|--------------------|-------------------------------------------------------|
| Dataset name:      | LimeLake.Steinman.2016                                |
| Archive type:      | LakeSediment                                          |
| Proxy type:        | d18O                                                  |
| Variable name:     | d18O                                                  |
| Latitude (° N):    | 48.874                                                |
| Longitude (° E):   | -117.338                                              |
| Elevation (m):     | 781.0                                                 |
| Interp. variable:  | P-E                                                   |
| Interp. detail:    | lake@surface                                          |
| Interp. season:    | winterOnly                                            |
| Interp. direction: | negative                                              |
| Pub. 1 title:      | Oxygen isotope records of Holocene climate variabi... |
| Pub. 1 authors:    | Steinman, Byron A.;Pompeani, David P.;Abbott, Mark... |
| Pub. 1 year:       | 2016                                                  |
| Pub. 1 DOI:        | 10.1016/j.quascirev.2016.04.012                       |
| Original data URL: | www.ncdc.noaa.gov/paleo/study/21250                   |

Proxy data and metadata  
LakeSediment | d18O | Castor.Nelson.2011 | LPDd7e6276fcc

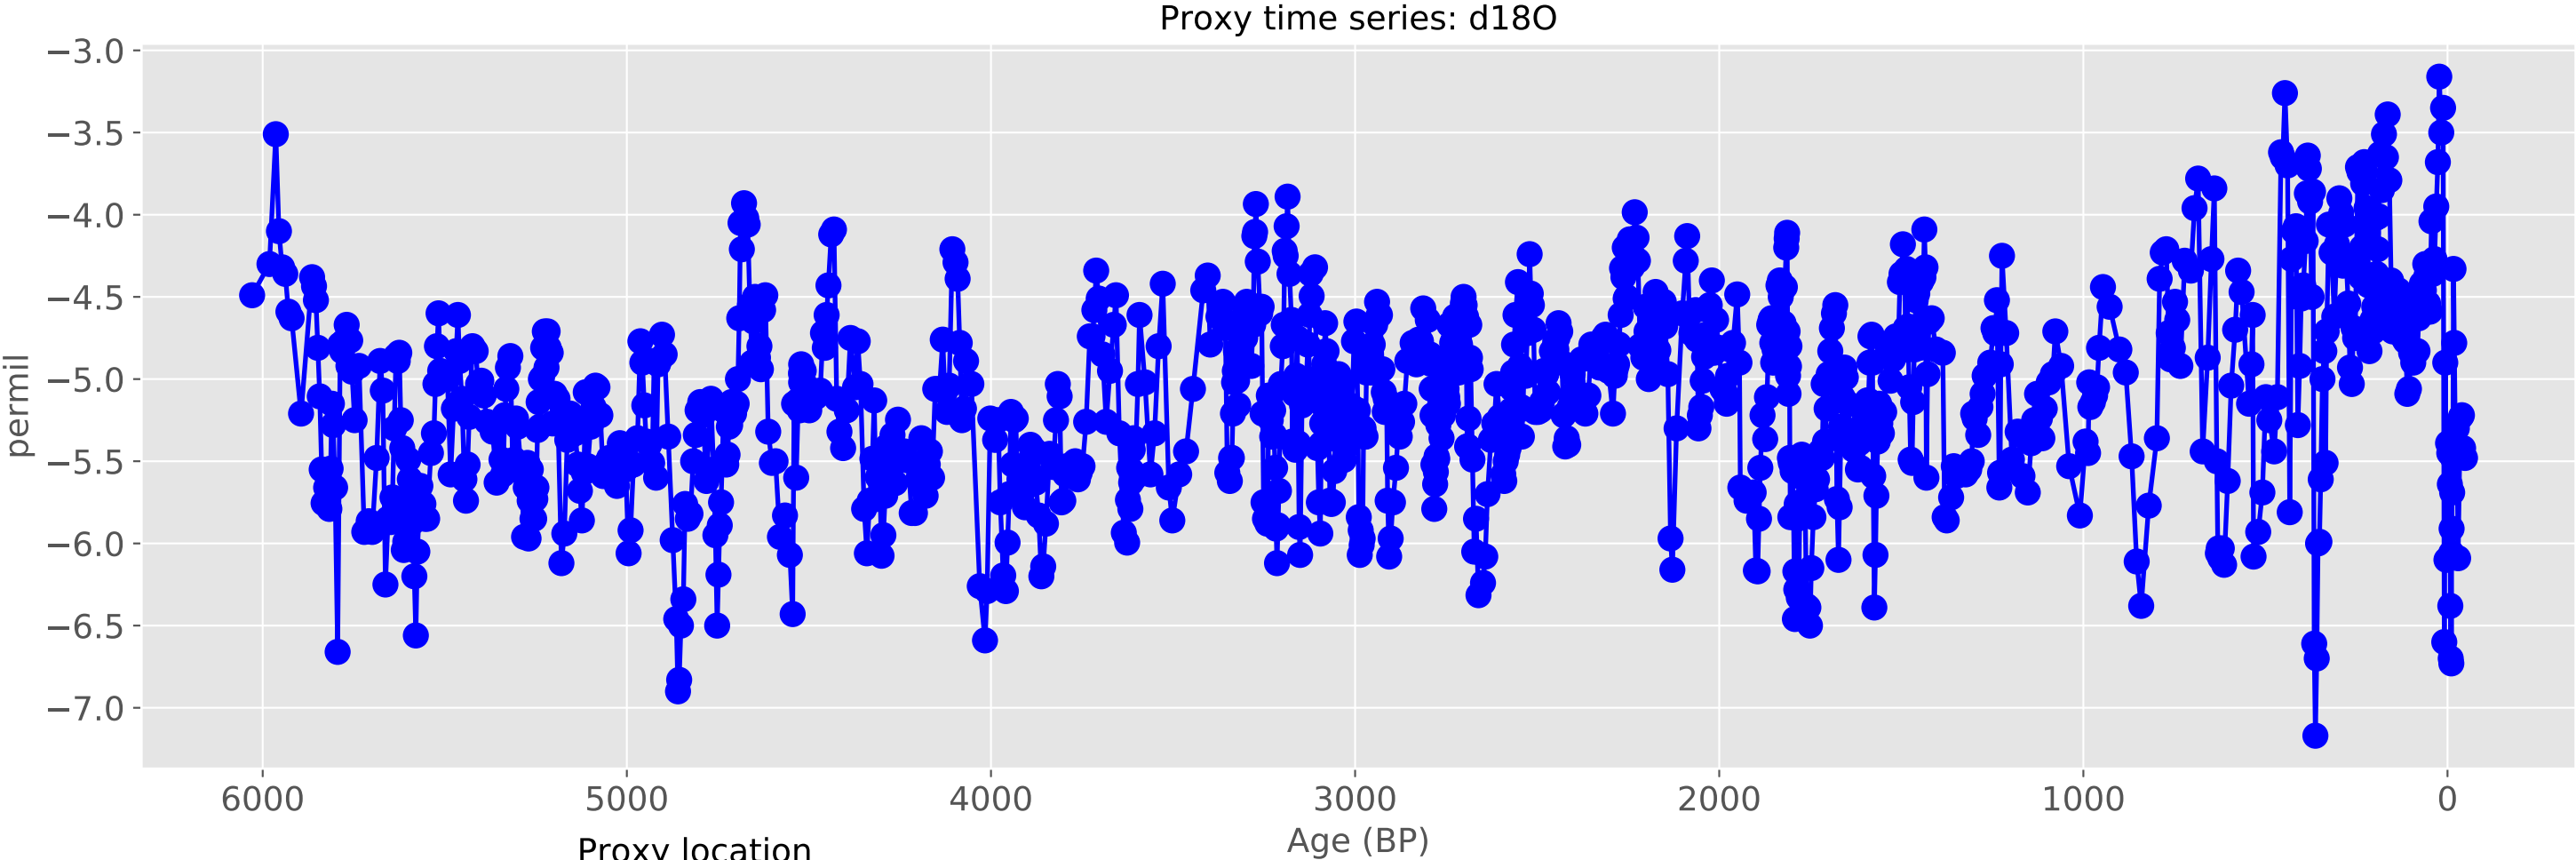

Proxy location  
(48.54 ° N, 119.56 ° W)

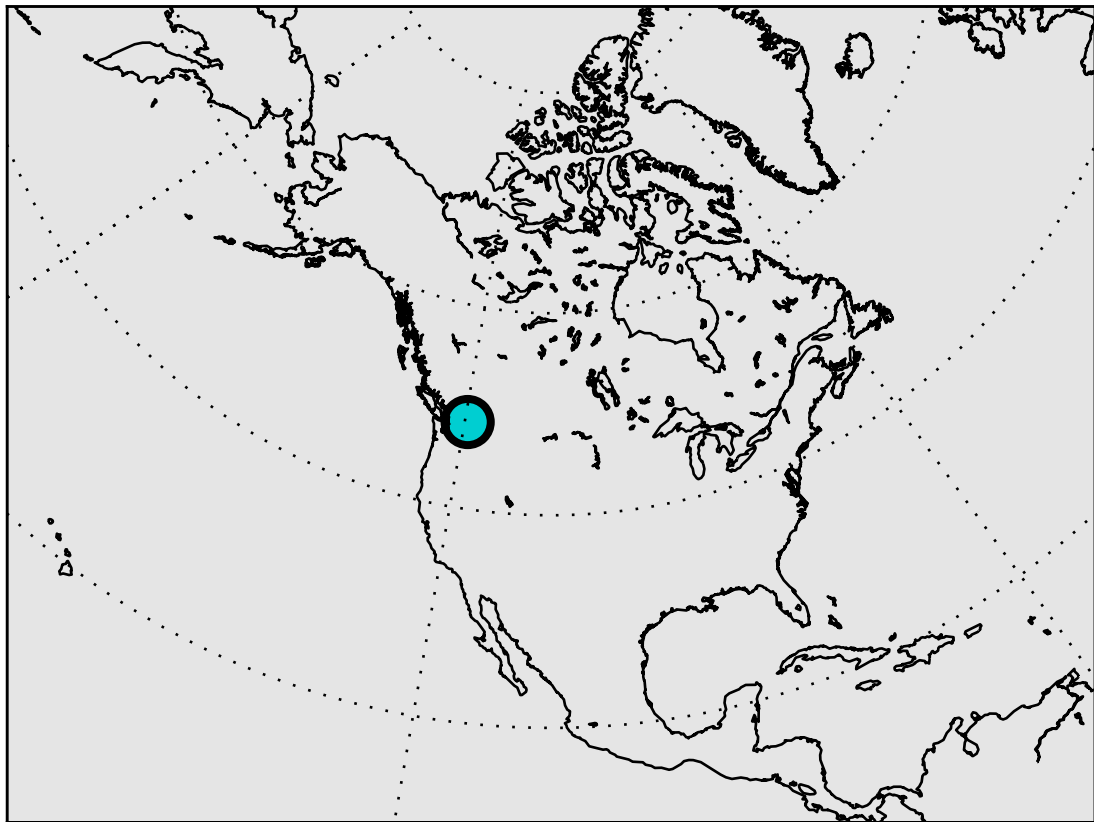

|                    |                                                                                              |
|--------------------|----------------------------------------------------------------------------------------------|
| Dataset name:      | Castor.Nelson.2011                                                                           |
| Archive type:      | LakeSediment                                                                                 |
| Proxy type:        | d18O                                                                                         |
| Variable name:     | d18O                                                                                         |
| Latitude ( ° N):   | 48.54                                                                                        |
| Longitude ( ° E):  | -119.56                                                                                      |
| Elevation (m):     | 594.0                                                                                        |
| Interp. variable:  | P-E                                                                                          |
| Interp. detail:    | lake@surface                                                                                 |
| Interp. season:    | annual                                                                                       |
| Interp. direction: | negative                                                                                     |
| Pub. 1 title:      | Drought variability in the Pacific Northwest from ...                                        |
| Pub. 1 authors:    | Nelson, D. B.;Abbott, M. B.;Steinman, B.;Polissar,...                                        |
| Pub. 1 year:       | 2011                                                                                         |
| Pub. 1 DOI:        | 10.1073/pnas.1009194108                                                                      |
| Original data URL: | <a href="http://www.ncdc.noaa.gov/paleo/study/10310">www.ncdc.noaa.gov/paleo/study/10310</a> |

Proxy data and metadata  
LakeSediment | d18O | Jones.Shapley.2009 | GH81e53153

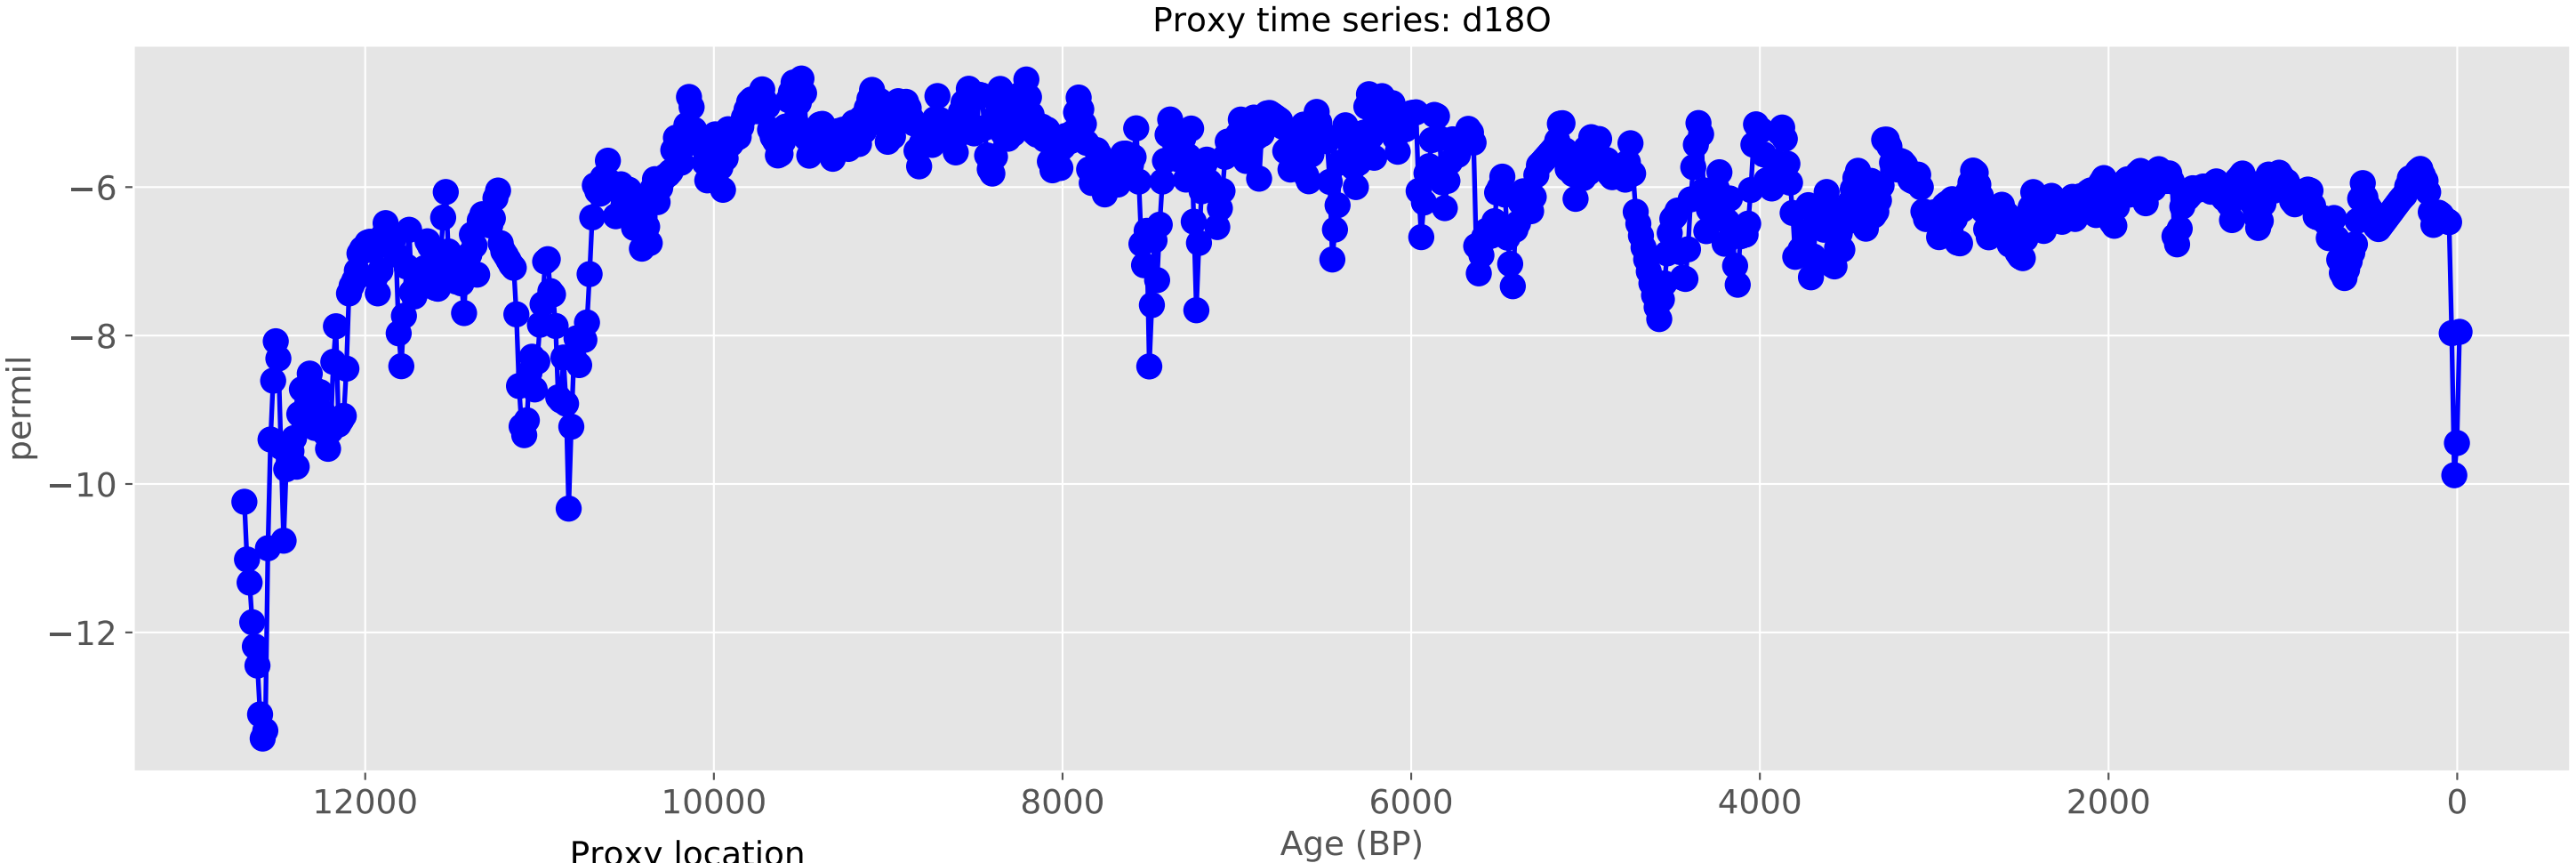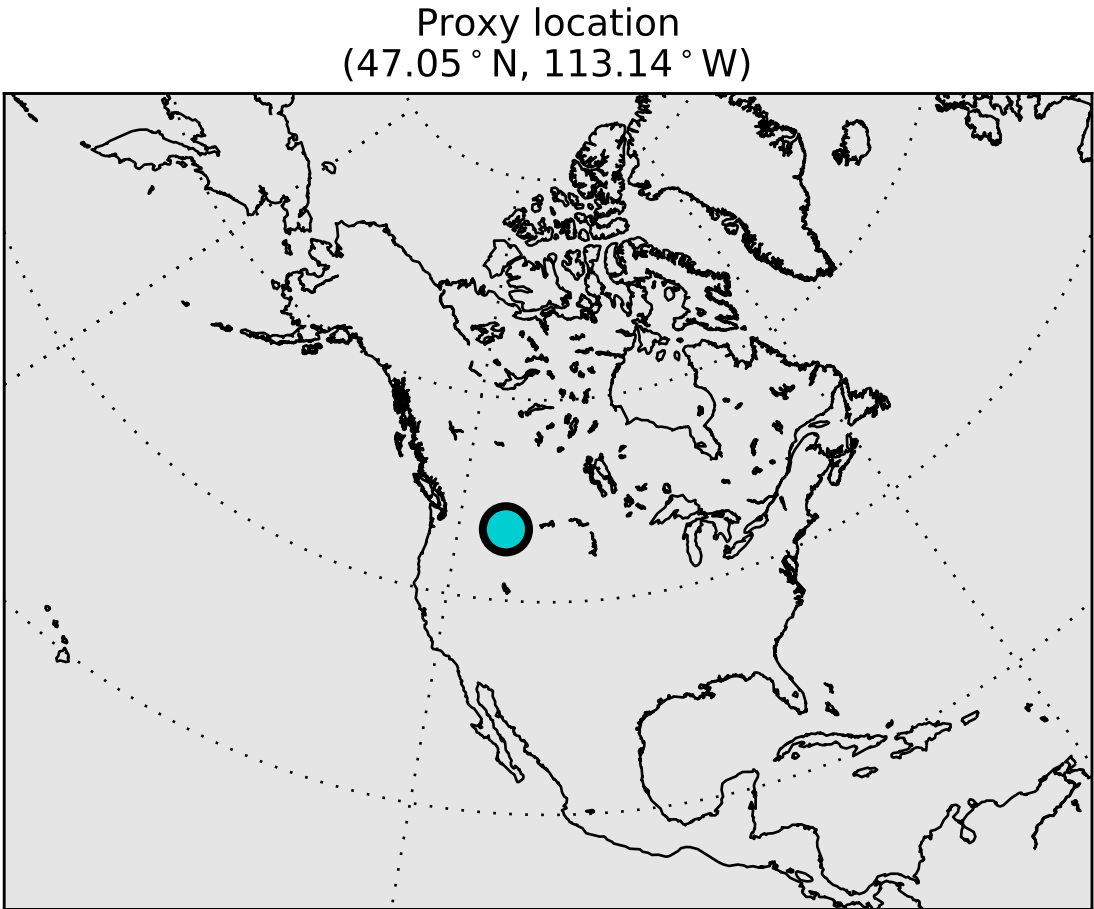

|                    |                                                       |
|--------------------|-------------------------------------------------------|
| Dataset name:      | Jones.Shapley.2009                                    |
| Archive type:      | LakeSediment                                          |
| Proxy type:        | d18O                                                  |
| Variable name:     | d18O                                                  |
| Latitude ( ° N):   | 47.05                                                 |
| Longitude ( ° E):  | -113.14                                               |
| Elevation (m):     | 1248.0                                                |
| Interp. variable:  | P-E                                                   |
| Interp. detail:    | lake@surface                                          |
| Interp. season:    | annual                                                |
| Interp. direction: | negative                                              |
| Pub. 1 title:      | Lateglacial and Holocene hydroclimate inferred fro... |
| Pub. 1 authors:    | Shapley, M.D.;Ito, E.;Donovan, J.J.                   |
| Pub. 1 year:       | 2009                                                  |
| Pub. 1 DOI:        | 10.1177/0959683609104029                              |
| Original data URL: | www.ncdc.noaa.gov/paleo/study/23076                   |

Proxy data and metadata  
LakeSediment | d18O | CreviceLake.Whitlock.2012 | WEBc734a518

Proxy time series: d18O

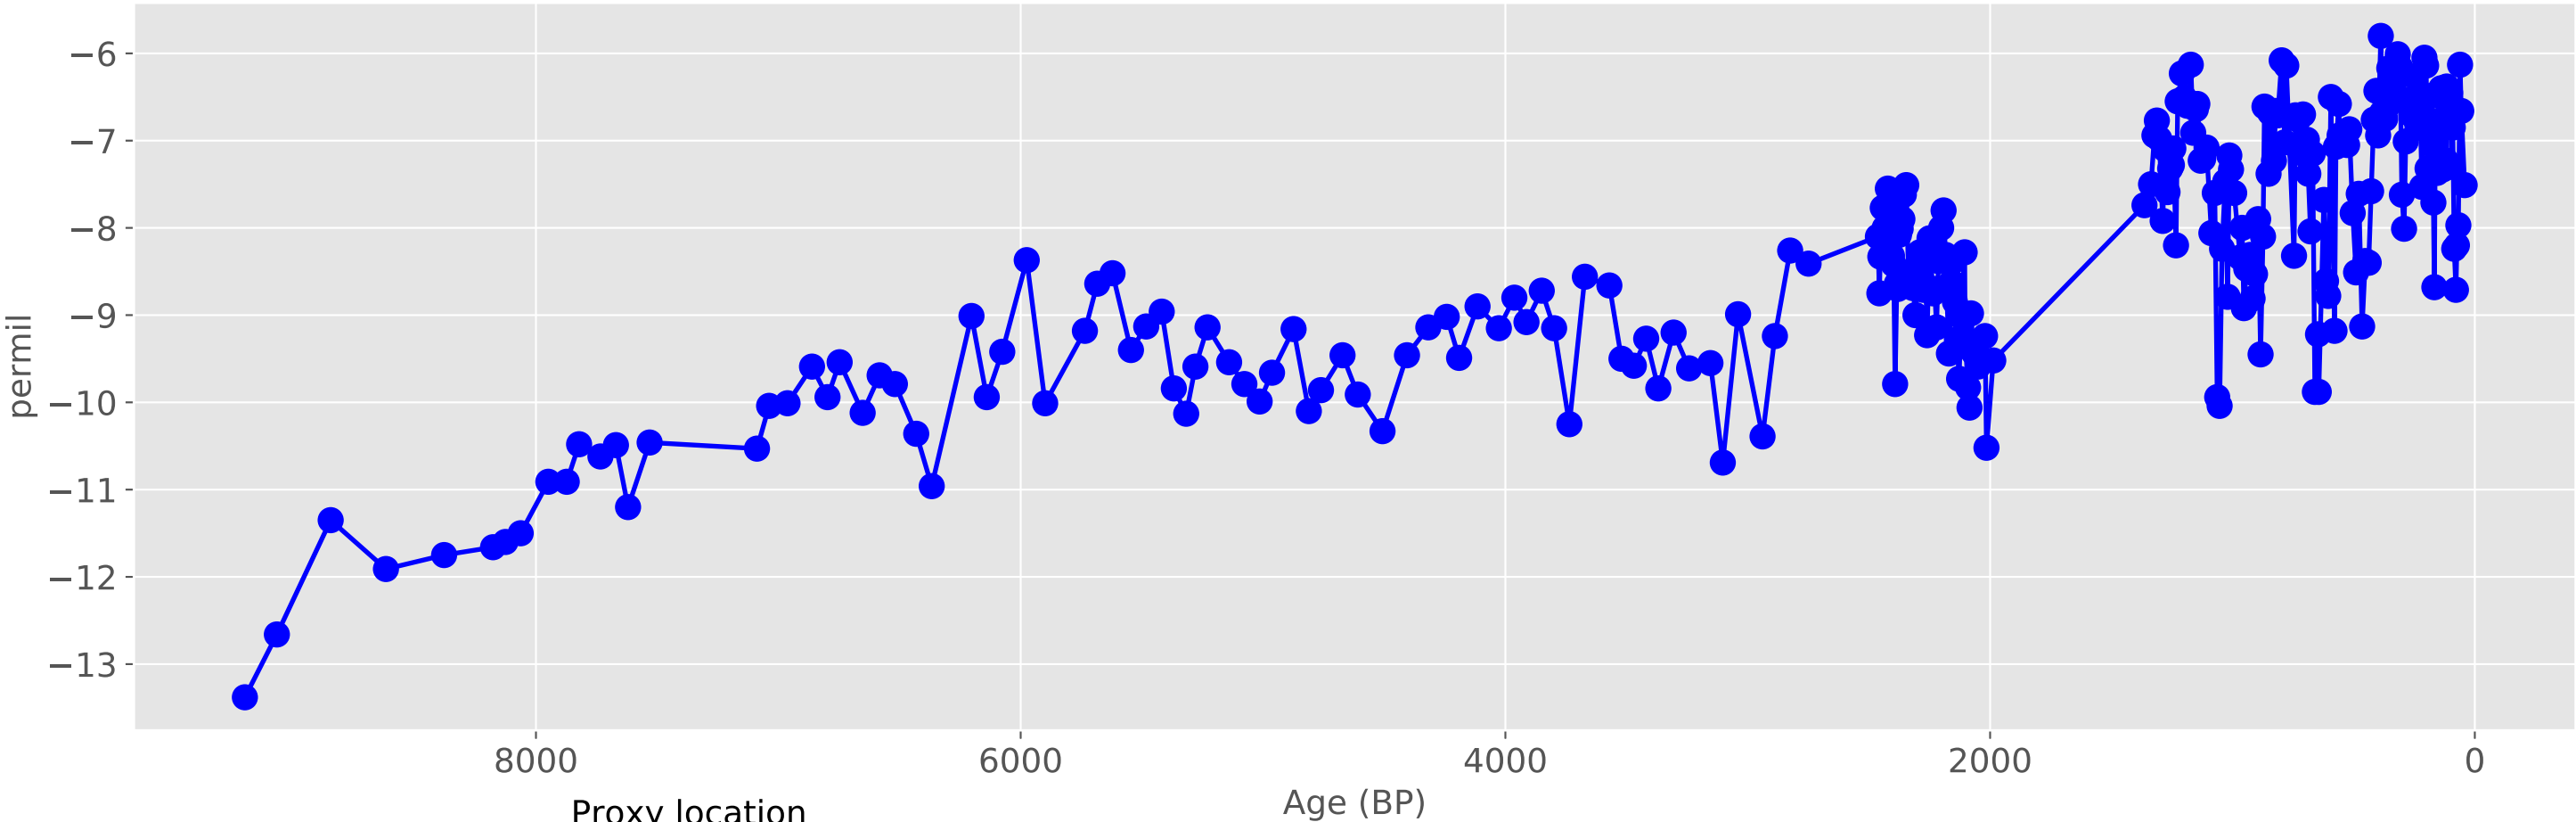

Proxy location  
(45.00 ° N, 110.58 ° W)

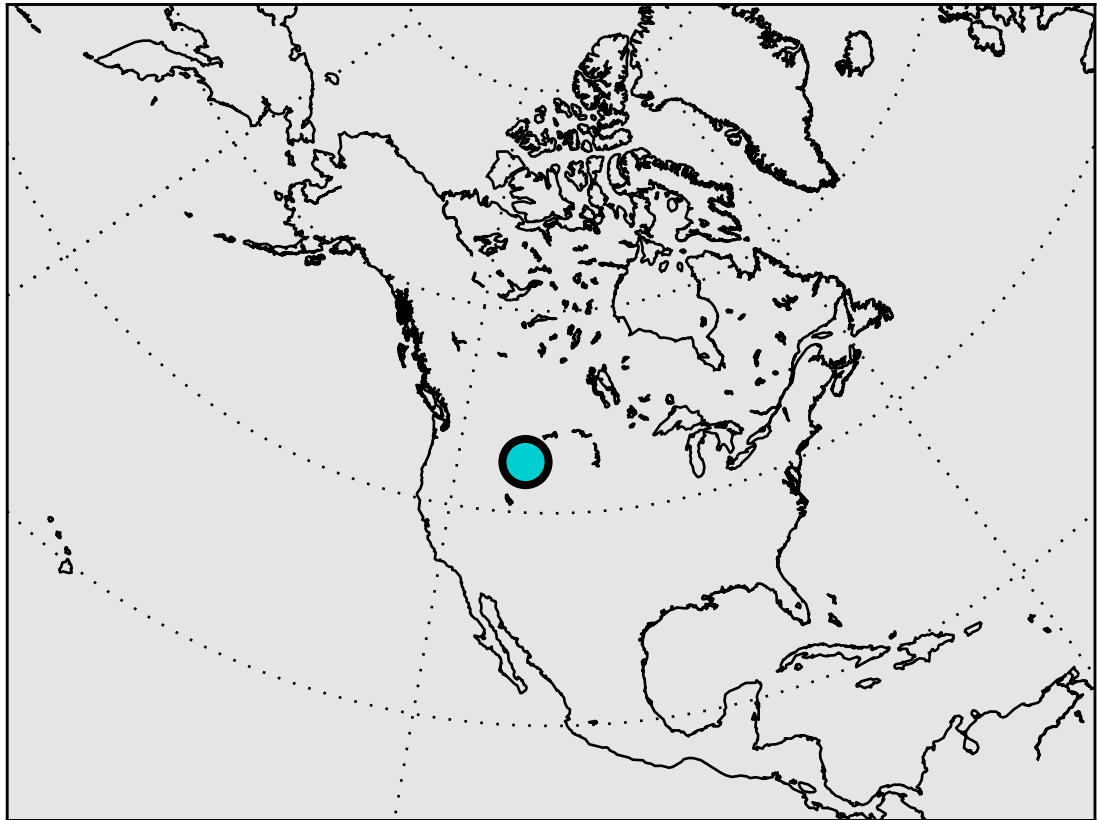

|                    |                                                       |
|--------------------|-------------------------------------------------------|
| Dataset name:      | CreviceLake.Whitlock.2012                             |
| Archive type:      | LakeSediment                                          |
| Proxy type:        | d18O                                                  |
| Variable name:     | d18O                                                  |
| Latitude ( ° N):   | 45.0                                                  |
| Longitude ( ° E):  | -110.58                                               |
| Elevation (m):     | 1713.0                                                |
| Interp. variable:  | P                                                     |
| Interp. detail:    | amount@srface                                         |
| Interp. season:    | winterOnly                                            |
| Interp. direction: | negative                                              |
| Pub. 1 title:      | Holocene seasonal variability inferred from multip... |
| Pub. 1 authors:    | Whitlock, Cathy;Dean, Walter E.;Fritz, Sherilyn C.... |
| Pub. 1 year:       | 2012                                                  |
| Pub. 1 DOI:        | 10.1016/j.palaeo.2012.03.001                          |
| Original data URL: | wNAm                                                  |

Proxy data and metadata  
LakeSediment | d18O | PyramidLake.Benson.2001 | LPDe0293a7c

Proxy time series: d18O

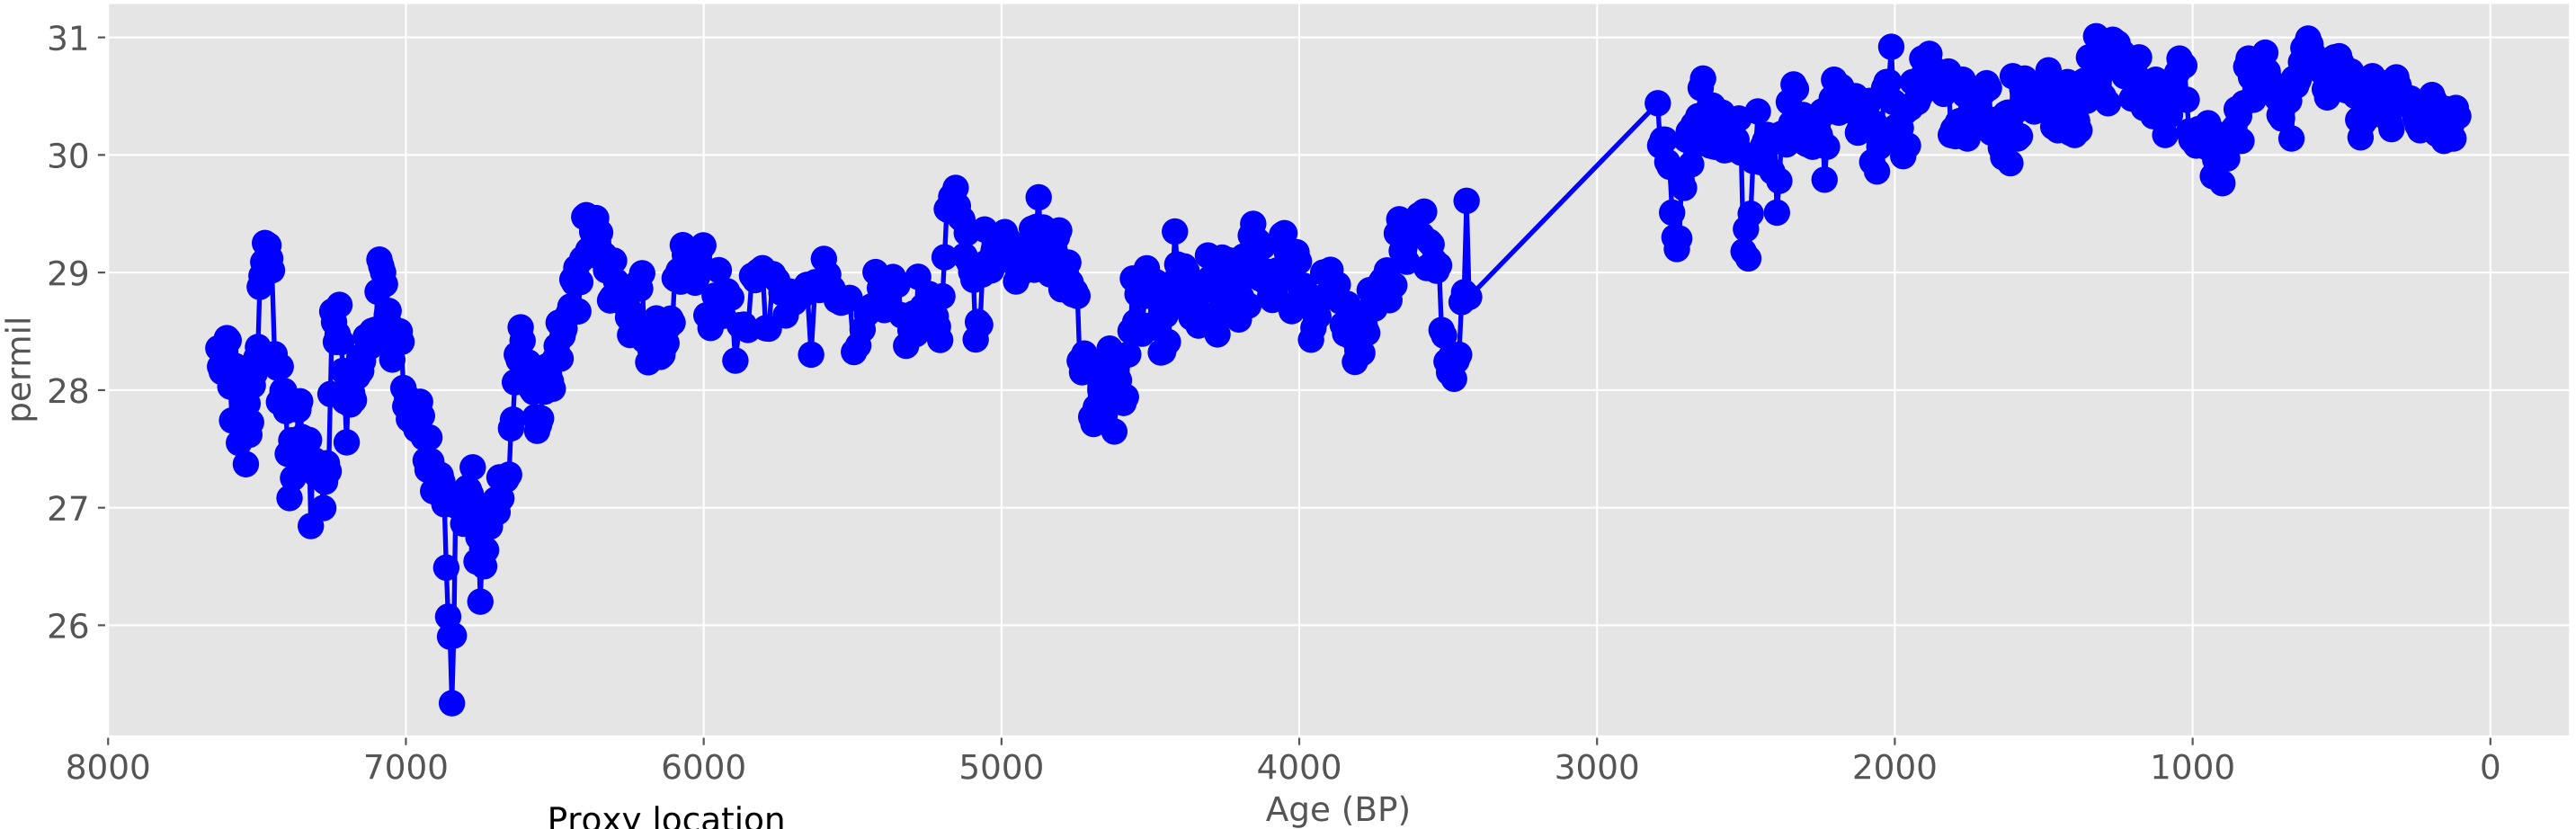

Proxy location  
(40.07 ° N, 119.58 ° W)

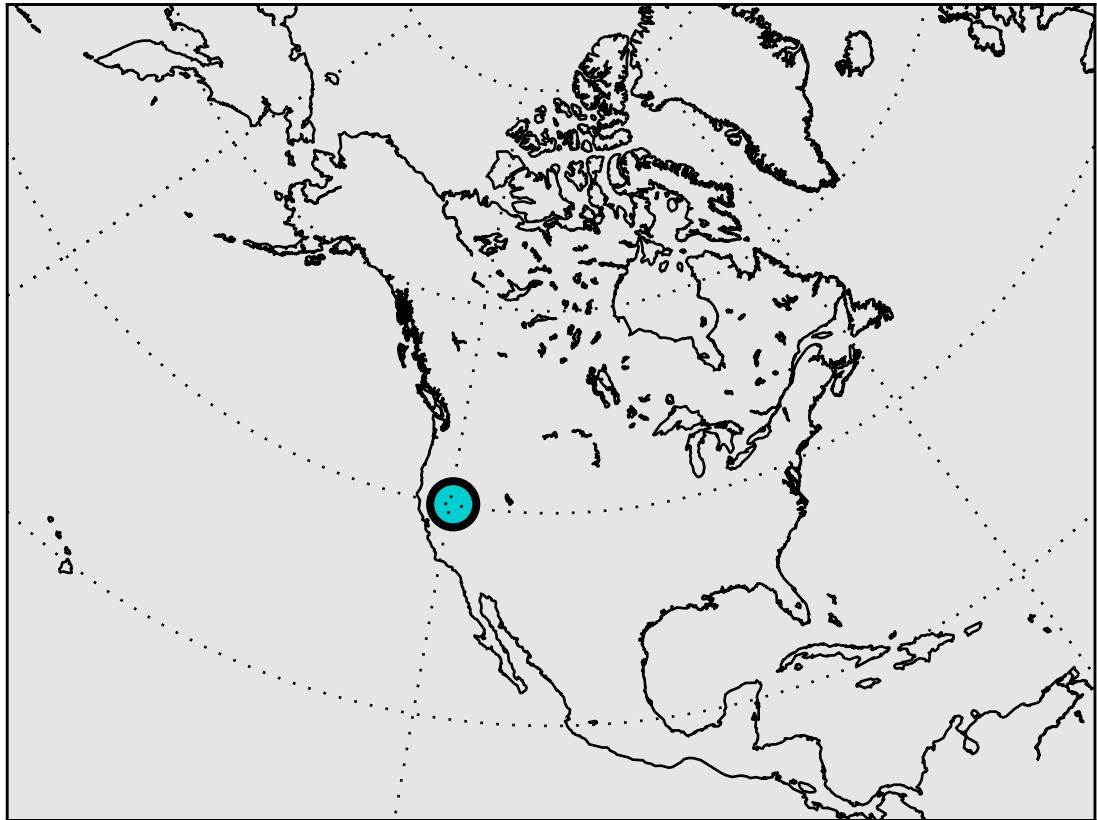

|                    |                                                                                                     |
|--------------------|-----------------------------------------------------------------------------------------------------|
| Dataset name:      | PyramidLake.Benson.2001                                                                             |
| Archive type:      | LakeSediment                                                                                        |
| Proxy type:        | d18O                                                                                                |
| Variable name:     | d18O                                                                                                |
| Latitude ( ° N):   | 40.072                                                                                              |
| Longitude ( ° E):  | -119.5835                                                                                           |
| Elevation (m):     | 1156.0                                                                                              |
| Interp. variable:  | P-E                                                                                                 |
| Interp. detail:    | lake@surface                                                                                        |
| Interp. season:    | annual                                                                                              |
| Interp. direction: | negative                                                                                            |
| Pub. 1 title:      | Holocene multidecadal and multicentennial droughts...                                               |
| Pub. 1 authors:    | Benson, Larry;Kashgarian, Michael;Rye, Robert;Lun...                                                |
| Pub. 1 year:       | 2002                                                                                                |
| Pub. 1 DOI:        | 10.1016/S0277-3791(01)00048-8                                                                       |
| Original data URL: | <a href="https://www.ncdc.noaa.gov/paleo/study/5472">https://www.ncdc.noaa.gov/paleo/study/5472</a> |



Proxy data and metadata

LakeSediment | d18O | BisonLake.Anderson.2011 | NAm2kHydro001

Proxy time series: d18O

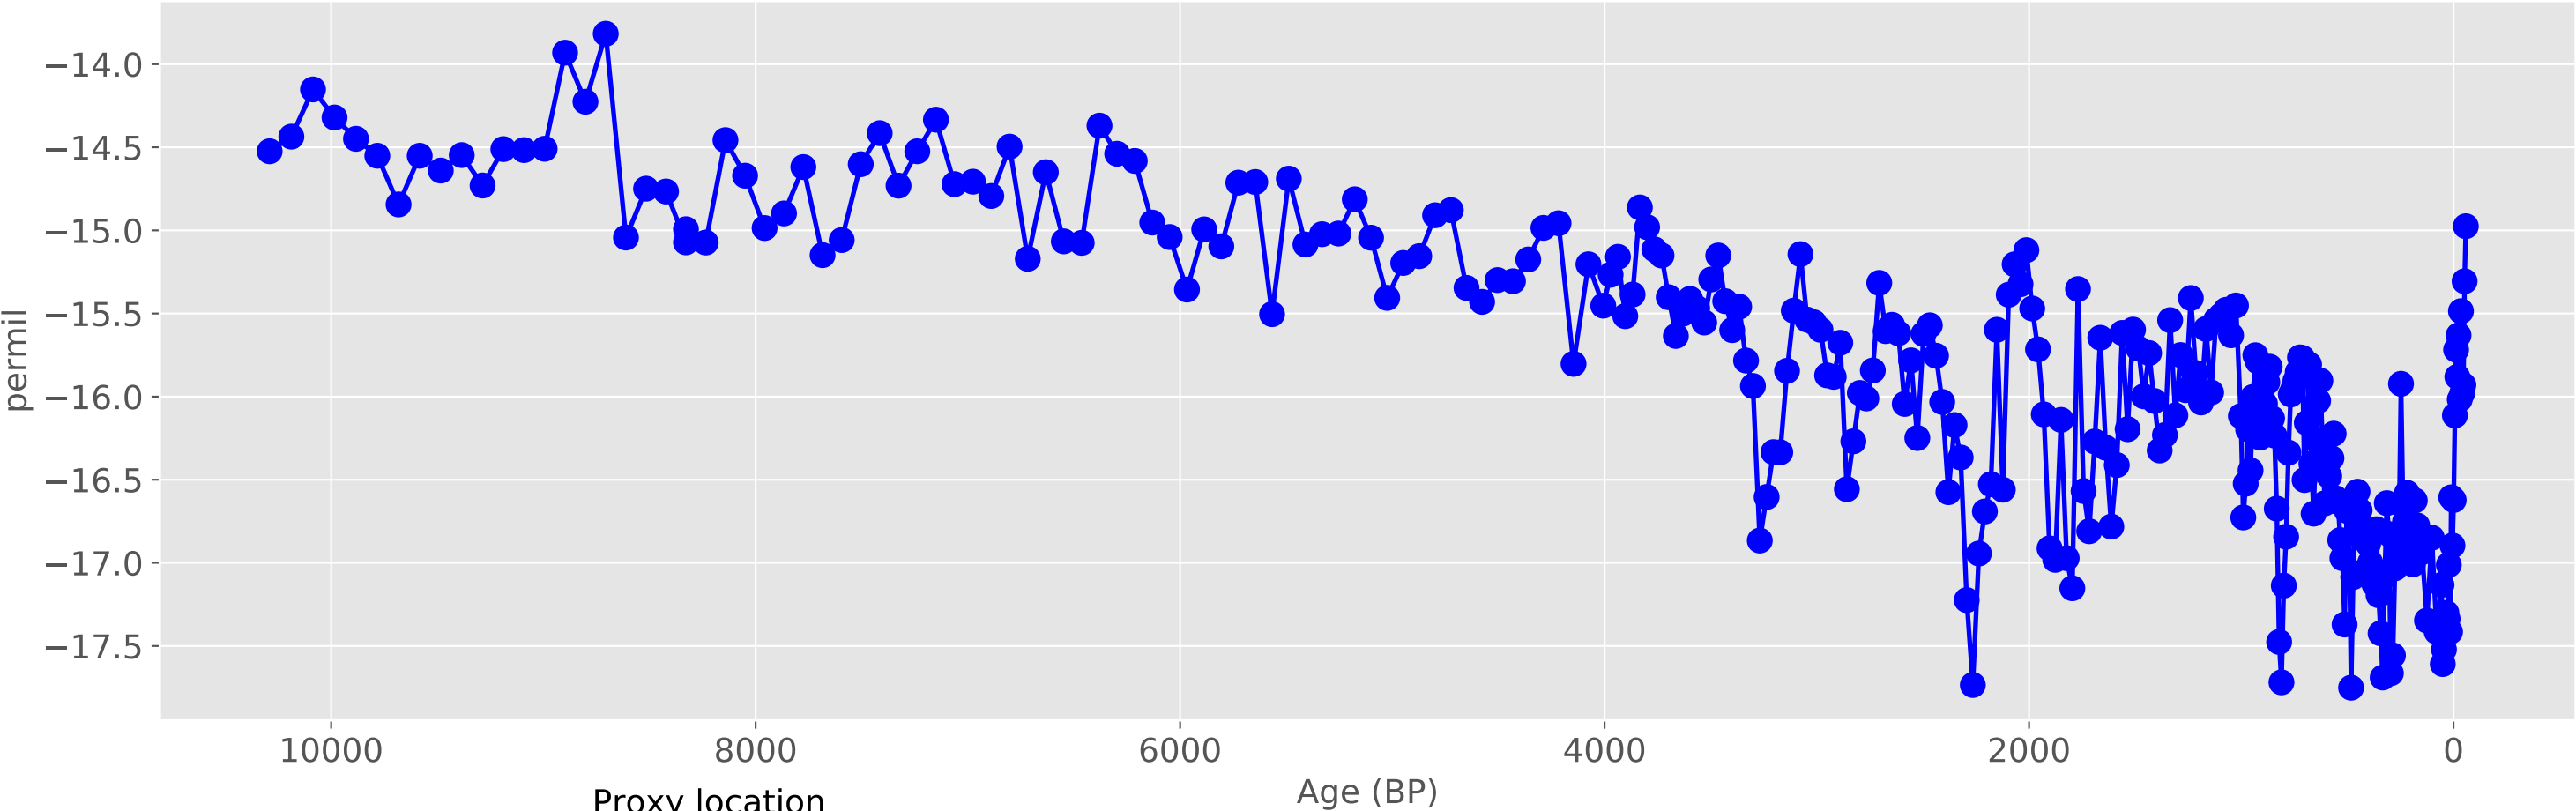

Proxy location  
(39.76 ° N, 107.35 ° W)

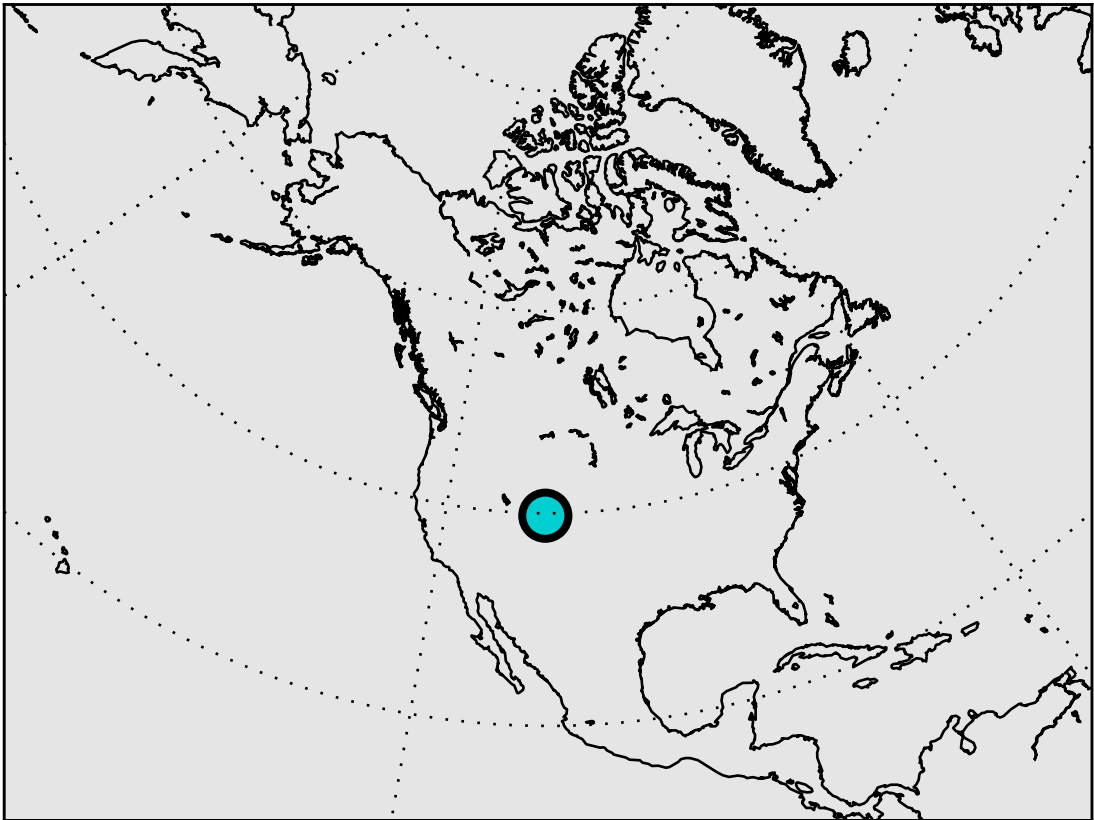

|                    |                                                                                              |
|--------------------|----------------------------------------------------------------------------------------------|
| Dataset name:      | BisonLake.Anderson.2011                                                                      |
| Archive type:      | LakeSediment                                                                                 |
| Proxy type:        | d18O                                                                                         |
| Variable name:     | d18O                                                                                         |
| Latitude ( ° N):   | 39.76                                                                                        |
| Longitude ( ° E):  | -107.35                                                                                      |
| Elevation (m):     | 3255.0                                                                                       |
| Interp. variable:  | P                                                                                            |
| Interp. detail:    | amount@surface                                                                               |
| Interp. season:    | winterOnly                                                                                   |
| Interp. direction: | negative                                                                                     |
| Pub. 1 title:      | Holocene record of precipitation seasonality from ...                                        |
| Pub. 1 authors:    | Anderson, Lesleigh                                                                           |
| Pub. 1 year:       | 2011                                                                                         |
| Pub. 1 DOI:        | 10.1130/G31575.1                                                                             |
| Original data URL: | <a href="http://www.ncdc.noaa.gov/paleo/study/10749">www.ncdc.noaa.gov/paleo/study/10749</a> |

Proxy data and metadata  
**LakeSediment | d18O | YellowLake.Anderson.2012 | GH95c4057f**

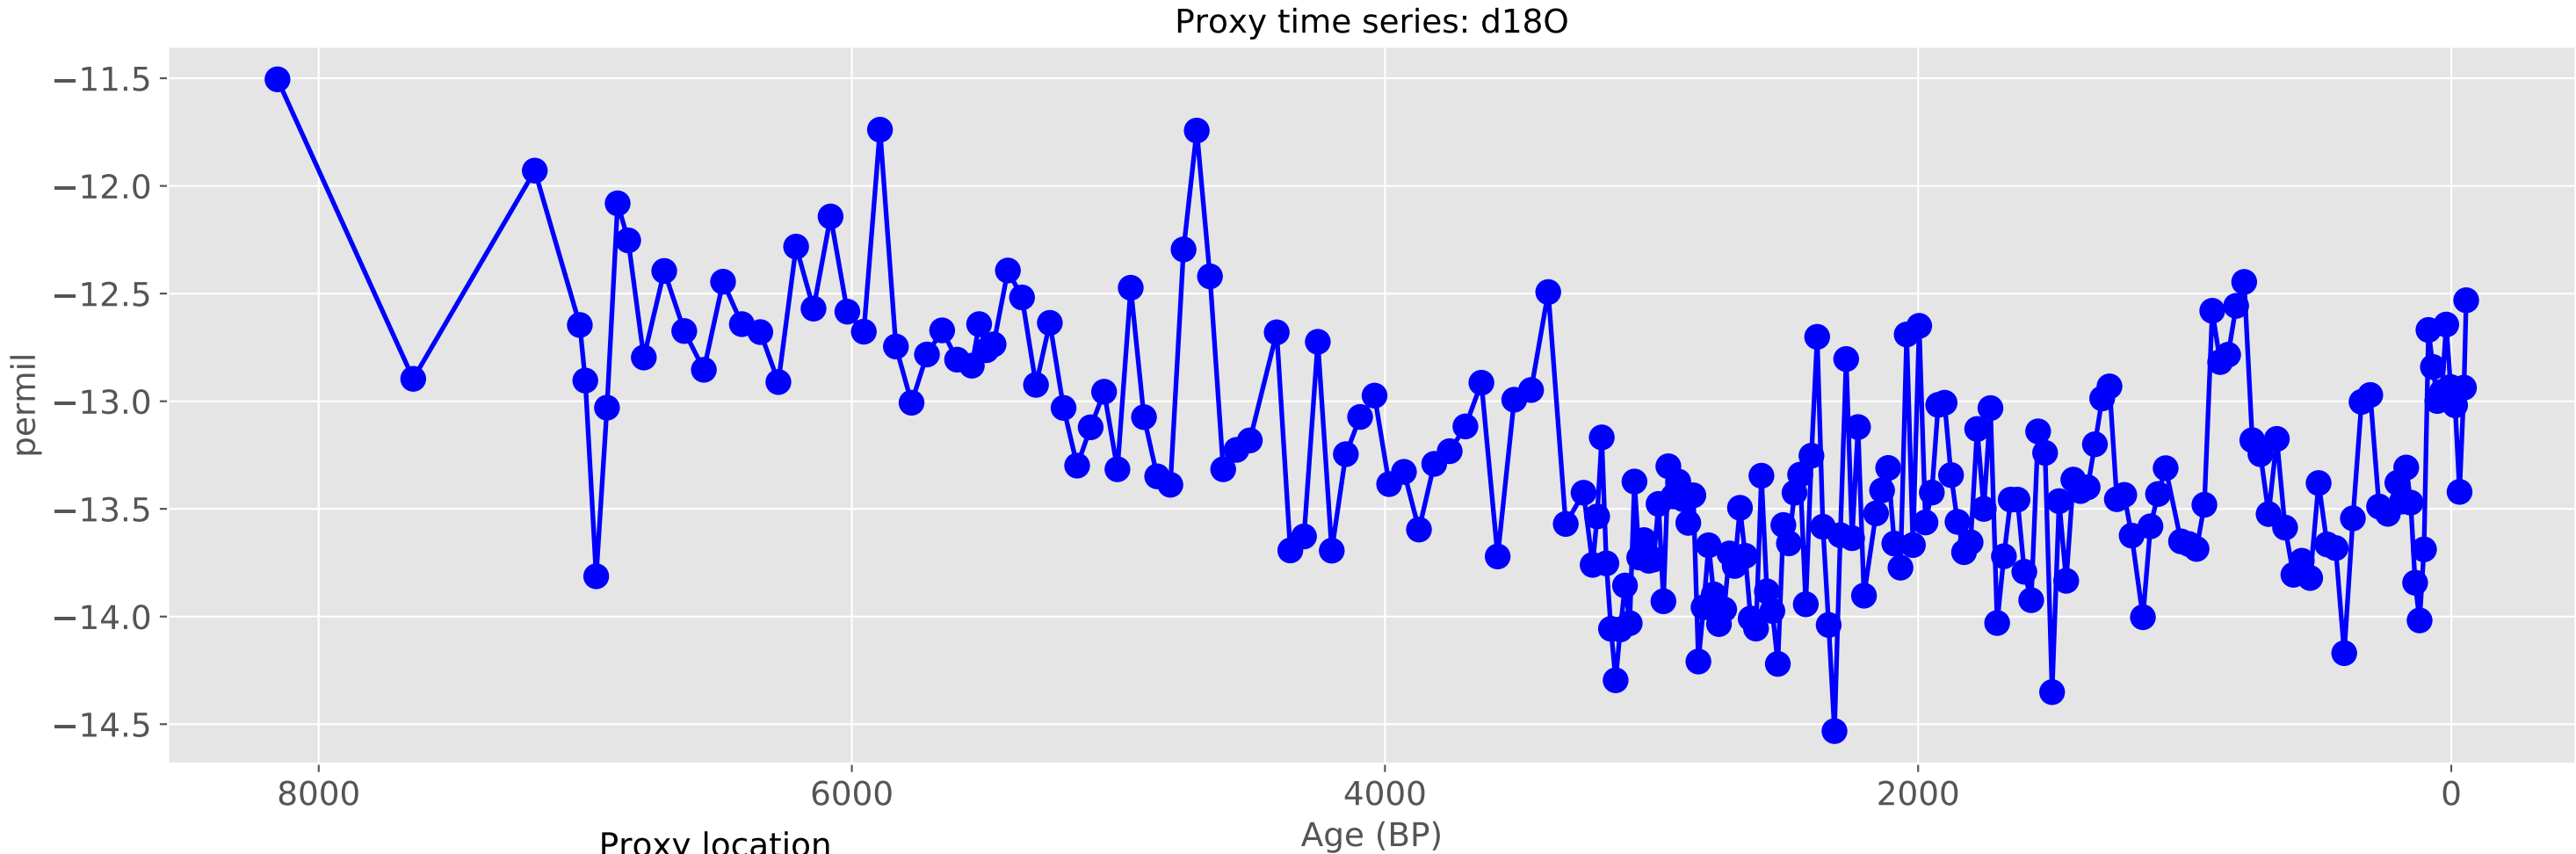

Proxy location  
(39.65 ° N, 107.34 ° W)

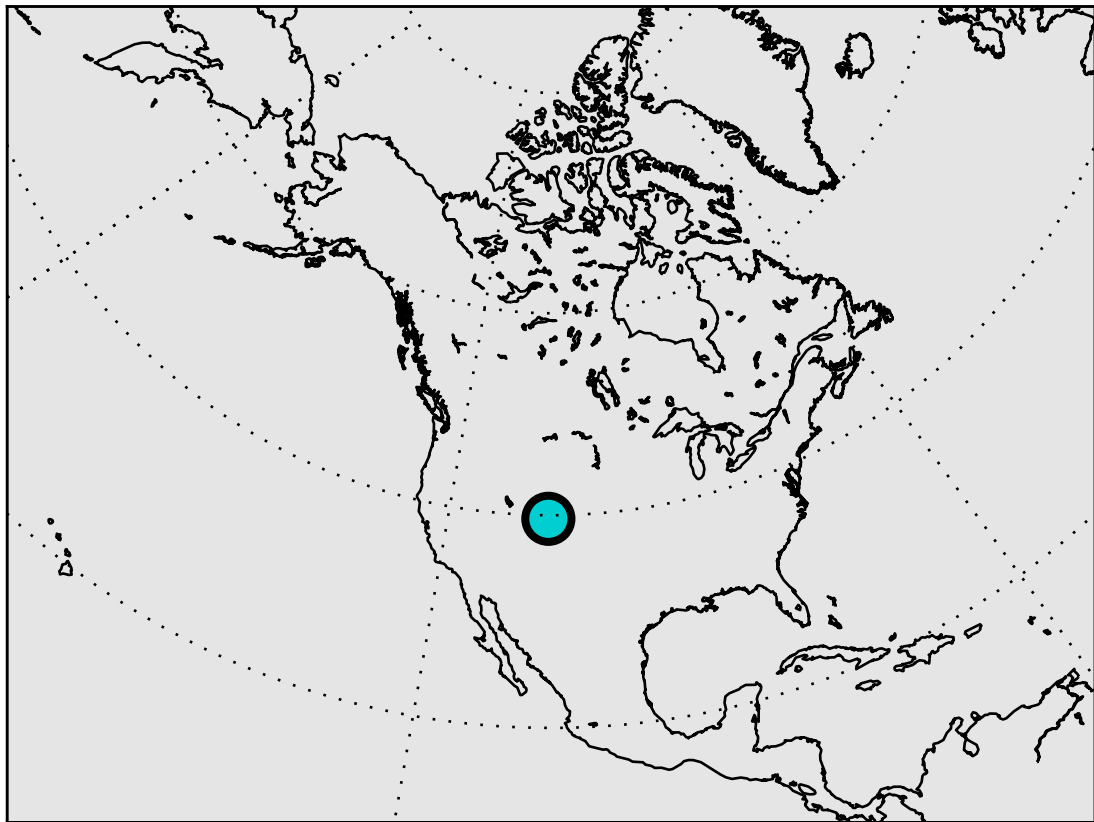

|                    |                                                                                              |
|--------------------|----------------------------------------------------------------------------------------------|
| Dataset name:      | YellowLake.Anderson.2012                                                                     |
| Archive type:      | LakeSediment                                                                                 |
| Proxy type:        | d18O                                                                                         |
| Variable name:     | d18O                                                                                         |
| Latitude ( ° N):   | 39.652                                                                                       |
| Longitude ( ° E):  | -107.345                                                                                     |
| Elevation (m):     | 3170.0                                                                                       |
| Interp. variable:  | P-E                                                                                          |
| Interp. detail:    | lake@surface                                                                                 |
| Interp. season:    | winterOnly                                                                                   |
| Interp. direction: | negative                                                                                     |
| Pub. 1 title:      | Rocky Mountain hydroclimate: Holocene variability ...                                        |
| Pub. 1 authors:    | Anderson, Lesleigh                                                                           |
| Pub. 1 year:       | 2012                                                                                         |
| Pub. 1 DOI:        | 10.1016/j.gloplacha.2012.05.012                                                              |
| Original data URL: | <a href="http://www.ncdc.noaa.gov/paleo/study/13120">www.ncdc.noaa.gov/paleo/study/13120</a> |

Proxy data and metadata

LakeSediment | d18O | OwensLake.Benson.2002 | GHff49b8d3

Proxy time series: d18O

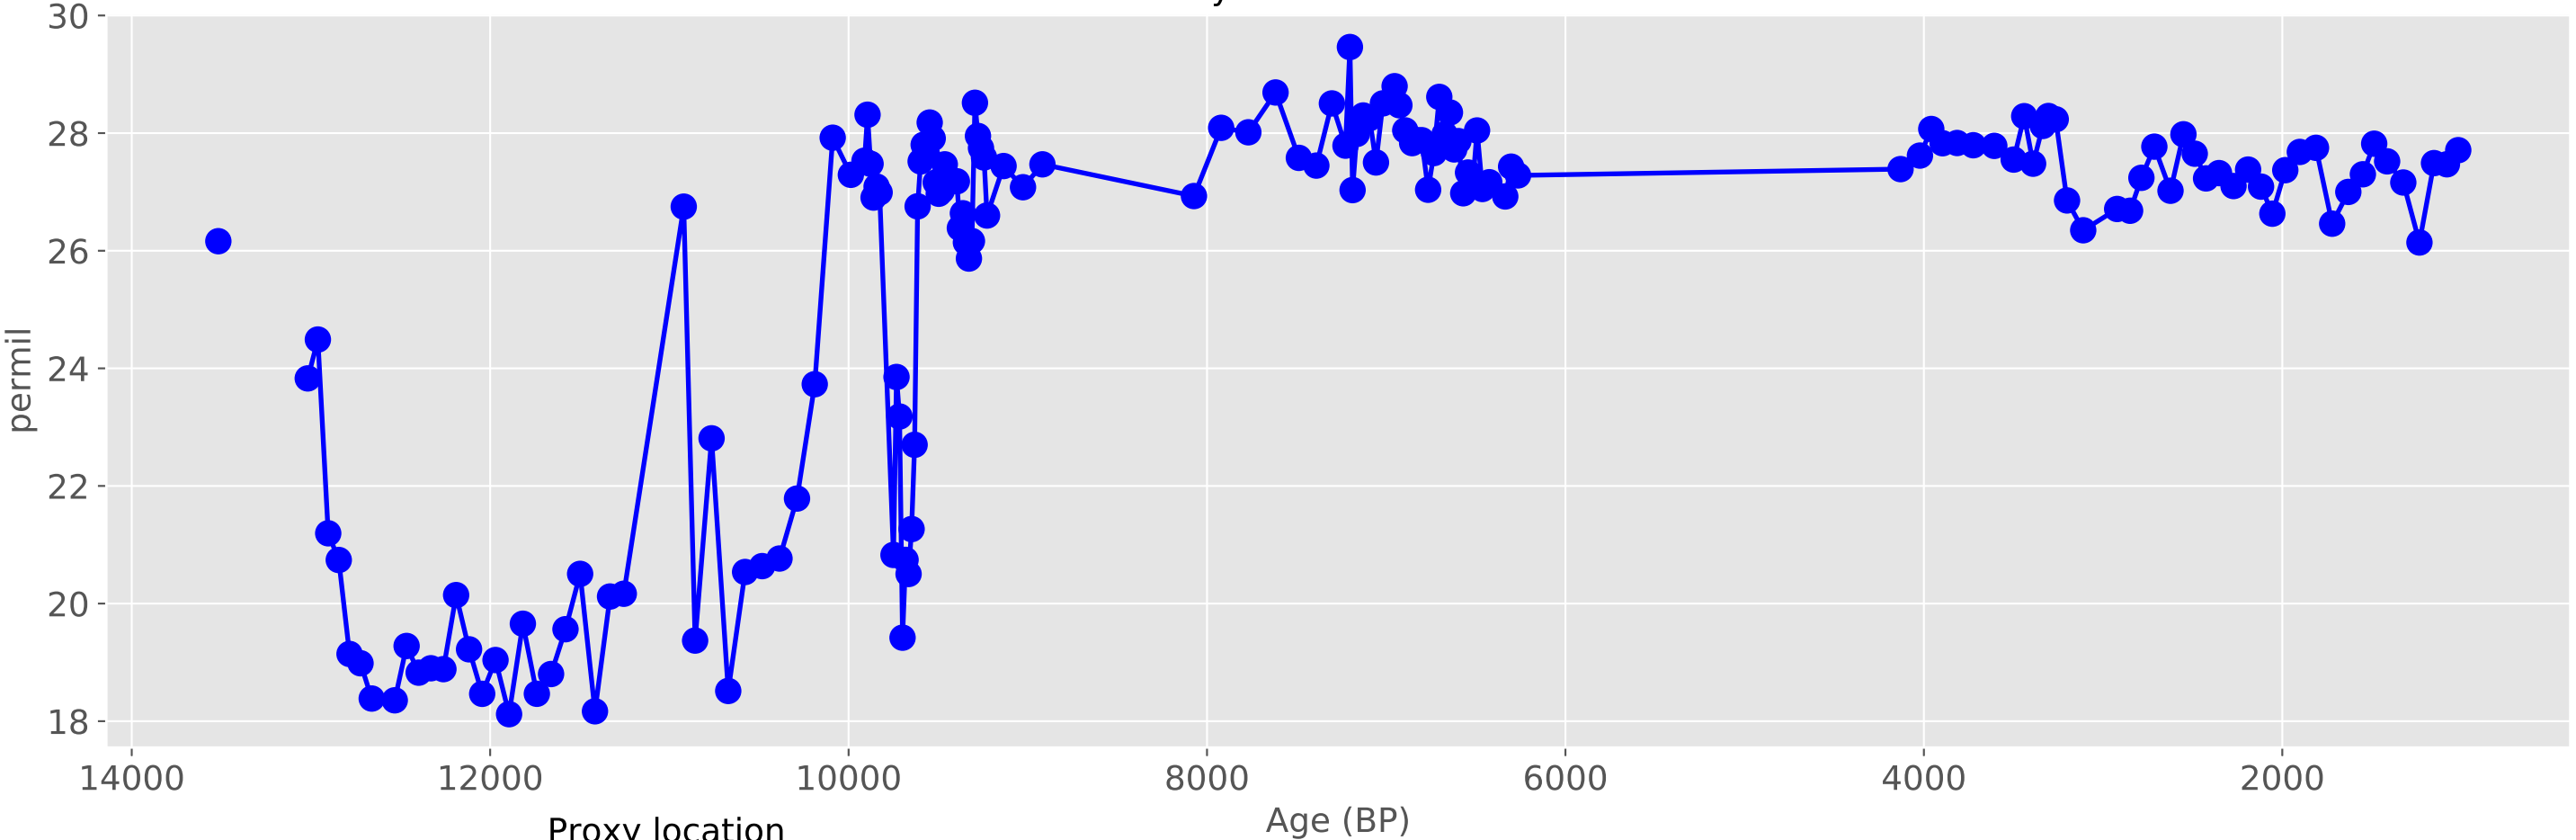

Proxy location  
(36.44 ° N, 117.97 ° W)

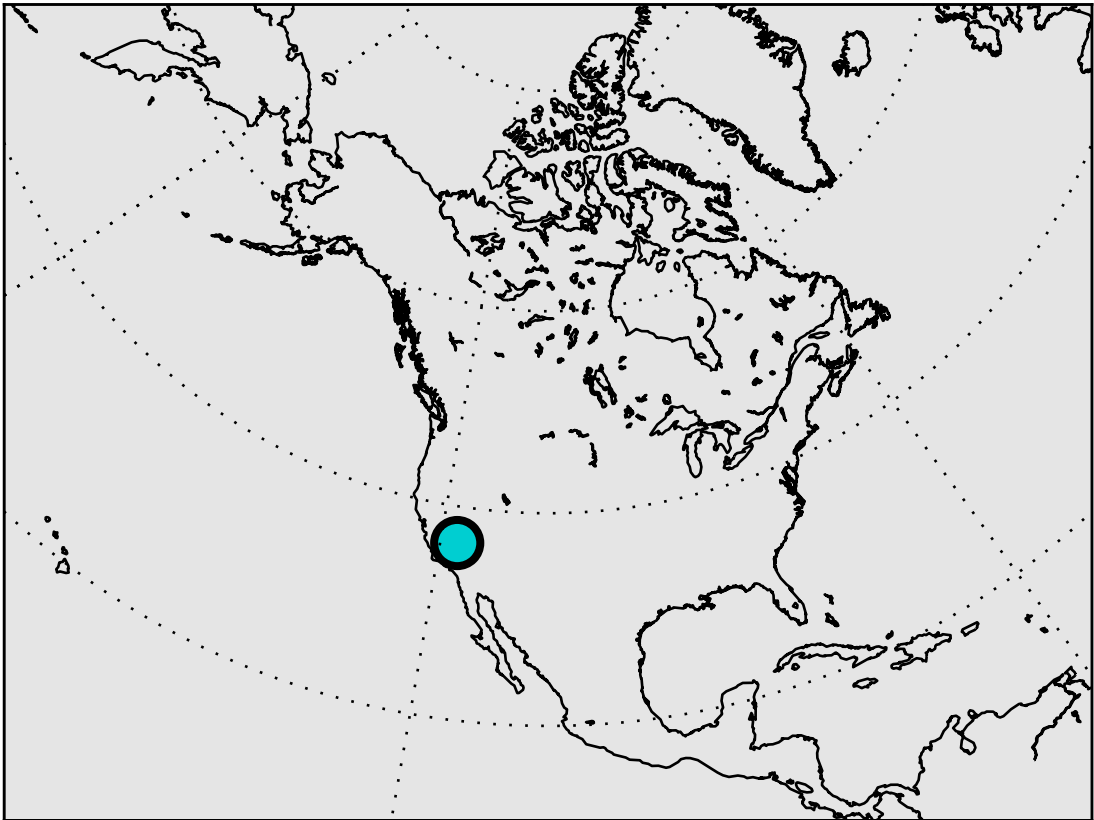

|                    |                                                       |
|--------------------|-------------------------------------------------------|
| Dataset name:      | OwensLake.Benson.2002                                 |
| Archive type:      | LakeSediment                                          |
| Proxy type:        | d18O                                                  |
| Variable name:     | d18O                                                  |
| Latitude ( ° N):   | 36.4367                                               |
| Longitude ( ° E):  | -117.9683                                             |
| Elevation (m):     | 1085.0                                                |
| Interp. variable:  | P-E                                                   |
| Interp. detail:    | lake@surface                                          |
| Interp. season:    | annual                                                |
| Interp. direction: | positive                                              |
| Pub. 1 title:      | Holocene multidecadal and multicentennial droughts... |
| Pub. 1 authors:    | Benson, Larry;Kashgarian, Michael;Rye, Robert;Lun...  |
| Pub. 1 year:       | 2002                                                  |
| Pub. 1 DOI:        | 10.1016/S0277-3791(01)00048-8                         |
| Original data URL: | www.ncdc.noaa.gov/paleo/study/5472                    |

Proxy data and metadata  
LakeSediment | d18O | Elsinore.Kirby.2019 | WEBc66a4fba

Proxy time series: d18O

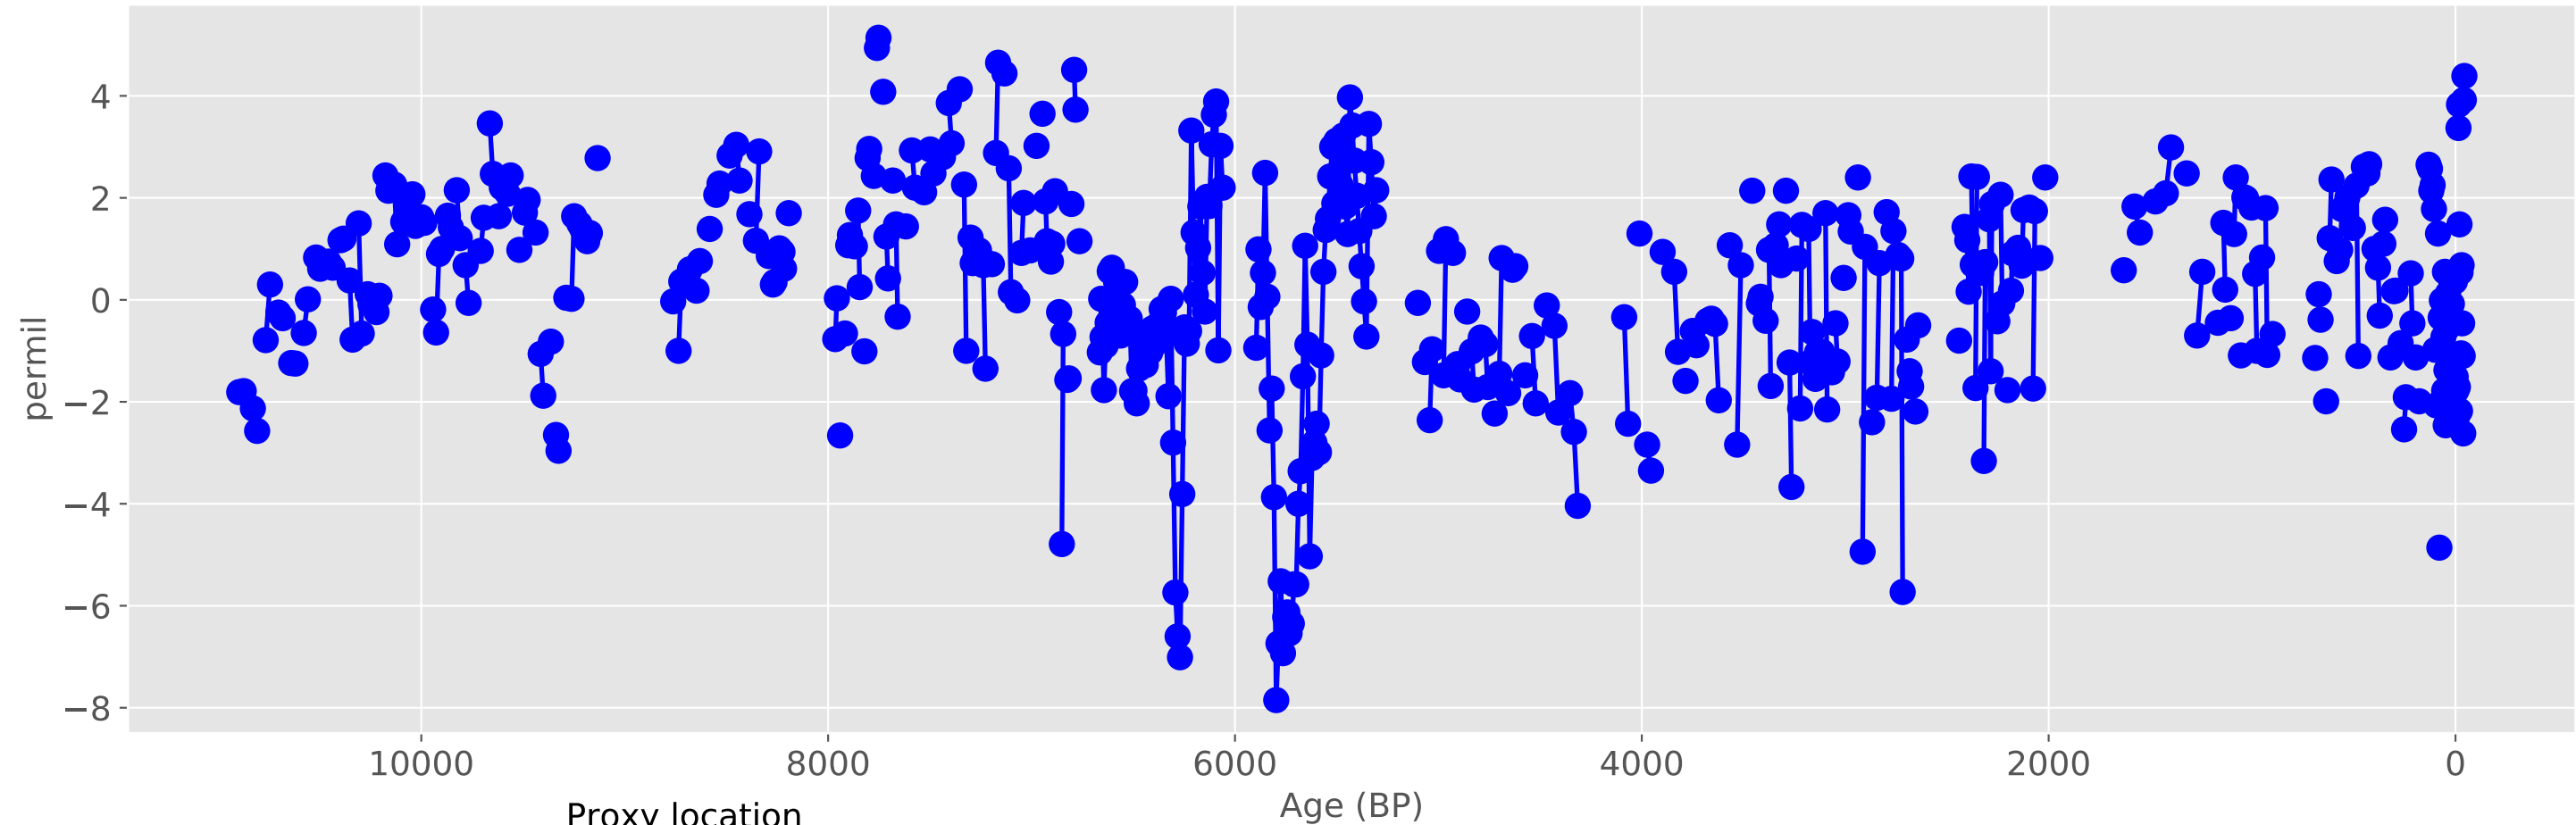

Proxy location  
(33.67 ° N, 117.35 ° W)

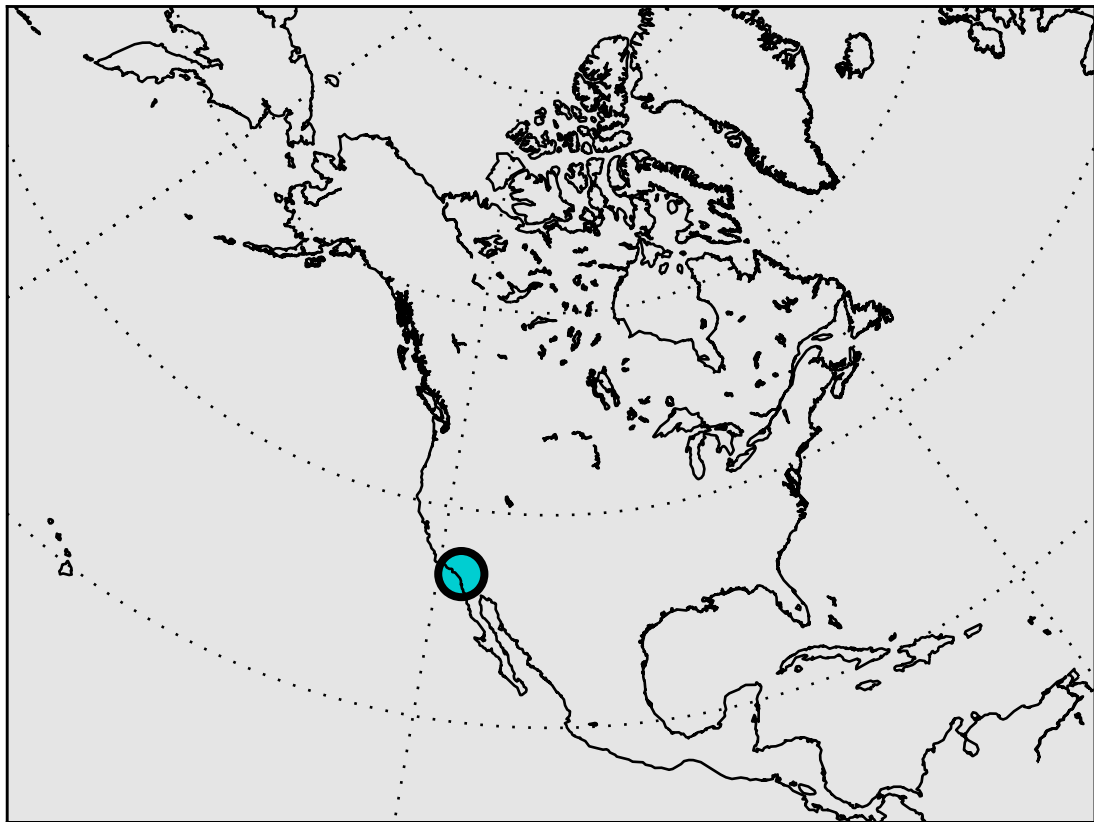

|                    |                                                                                              |
|--------------------|----------------------------------------------------------------------------------------------|
| Dataset name:      | Elsinore.Kirby.2019                                                                          |
| Archive type:      | LakeSediment                                                                                 |
| Proxy type:        | d18O                                                                                         |
| Variable name:     | d18O                                                                                         |
| Latitude ( ° N):   | 33.6733                                                                                      |
| Longitude ( ° E):  | -117.3542                                                                                    |
| Elevation (m):     | 379.0                                                                                        |
| Interp. variable:  | P                                                                                            |
| Interp. detail:    | amount@surface                                                                               |
| Interp. season:    | summerOnly                                                                                   |
| Interp. direction: | negative                                                                                     |
| Pub. 1 title:      | Pacific Southwest United States Holocene Droughts ...                                        |
| Pub. 1 authors:    | Kirby, Matthew Edward Christopher;Patterson, Willi...                                        |
| Pub. 1 year:       | 2019                                                                                         |
| Pub. 1 DOI:        | 10.3389/feart.2019.00074                                                                     |
| Original data URL: | <a href="http://www.ncdc.noaa.gov/paleo/study/30232">www.ncdc.noaa.gov/paleo/study/30232</a> |

Proxy data and metadata  
LakeSediment | d18O | Chichancanab.Hodell.1995 | GHc5186b8c

Proxy time series: d18O

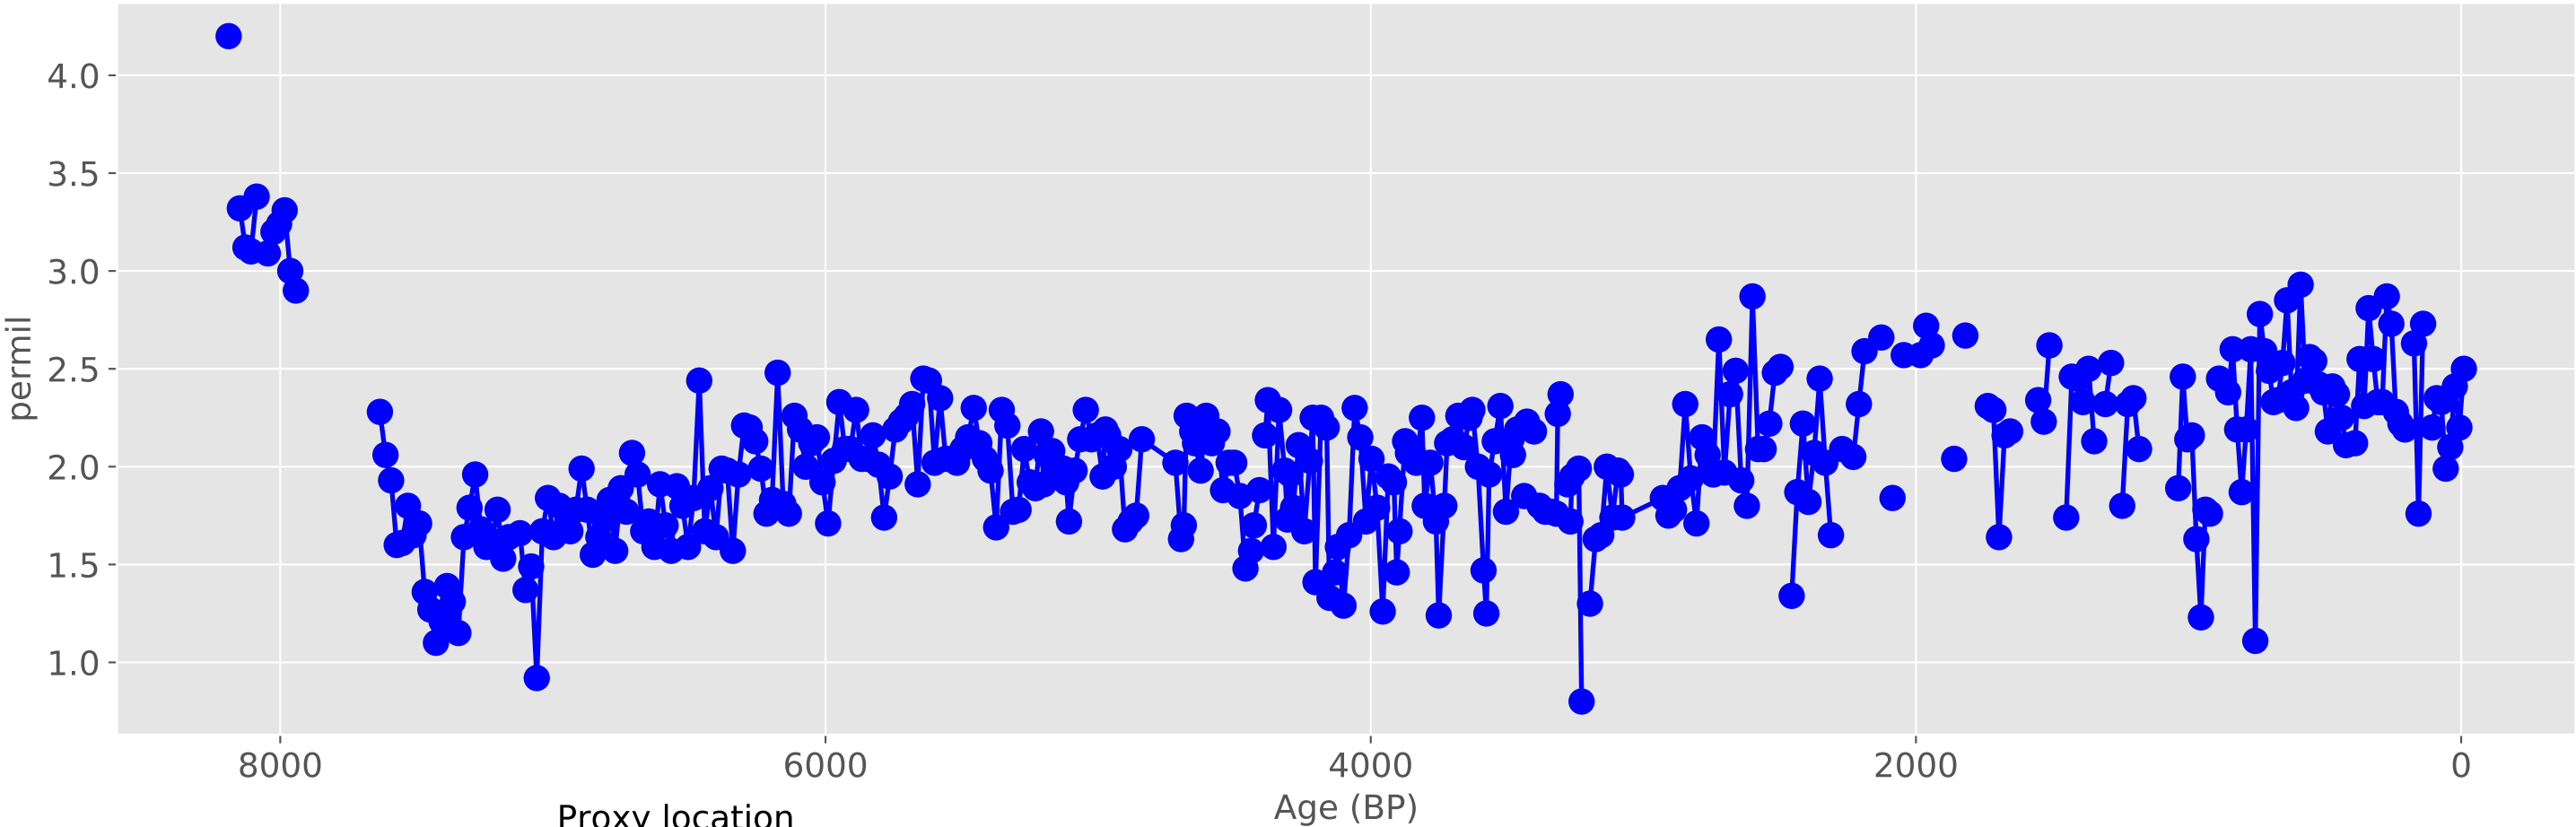

Proxy location  
(19.83 ° N, 88.75 ° W)

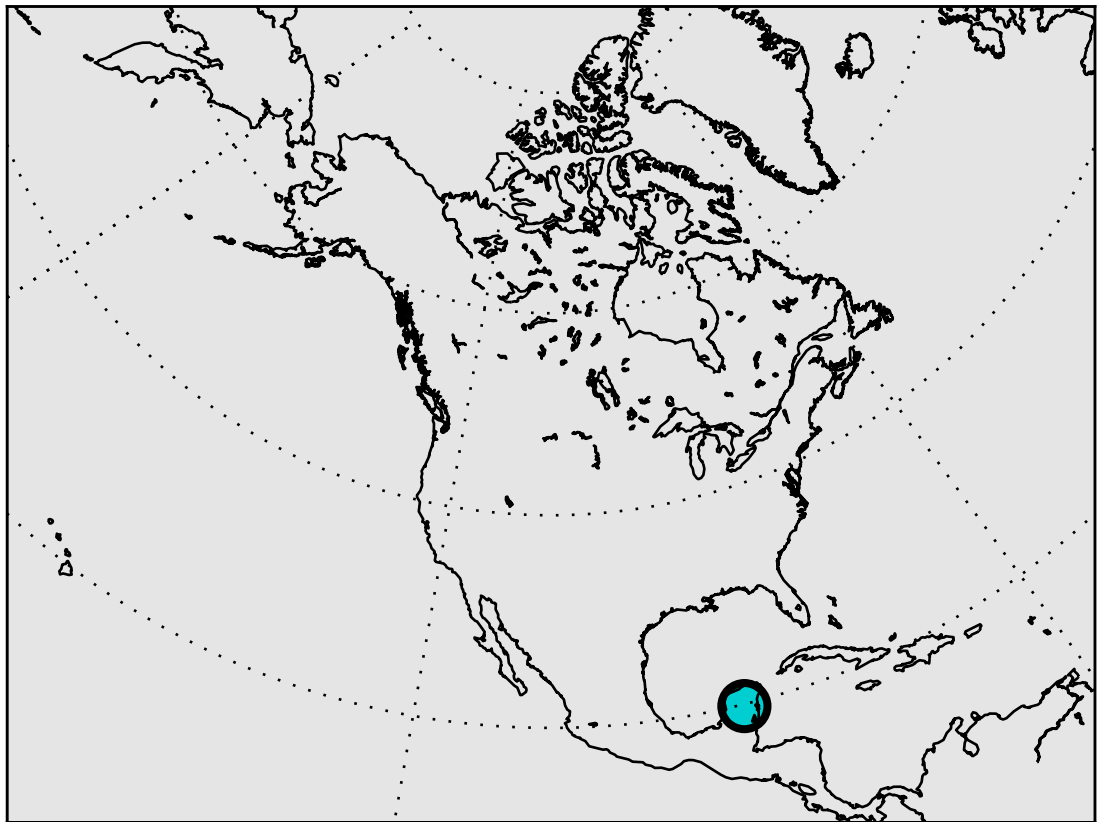

|                    |                                                                                            |
|--------------------|--------------------------------------------------------------------------------------------|
| Dataset name:      | Chichancanab.Hodell.1995                                                                   |
| Archive type:      | LakeSediment                                                                               |
| Proxy type:        | d18O                                                                                       |
| Variable name:     | d18O                                                                                       |
| Latitude ( ° N):   | 19.8333                                                                                    |
| Longitude ( ° E):  | -88.75                                                                                     |
| Elevation (m):     | 3.0                                                                                        |
| Interp. variable:  | P-E                                                                                        |
| Interp. detail:    | lake@surface                                                                               |
| Interp. season:    | summerOnly                                                                                 |
| Interp. direction: | negative                                                                                   |
| Pub. 1 title:      | Possible role of climate in the collapse of Classi...                                      |
| Pub. 1 authors:    | Hodell, David A.;Curtis, Jason H.;Brenner, Mark                                            |
| Pub. 1 year:       | 1995                                                                                       |
| Pub. 1 DOI:        | 10.1038/375391a0                                                                           |
| Original data URL: | <a href="http://www.ncdc.noaa.gov/paleo/study/5483">www.ncdc.noaa.gov/paleo/study/5483</a> |

Proxy data and metadata  
LakeSediment | d18O | Chichancanab.Hodell.1995 | GHce286279

Proxy time series: d18O

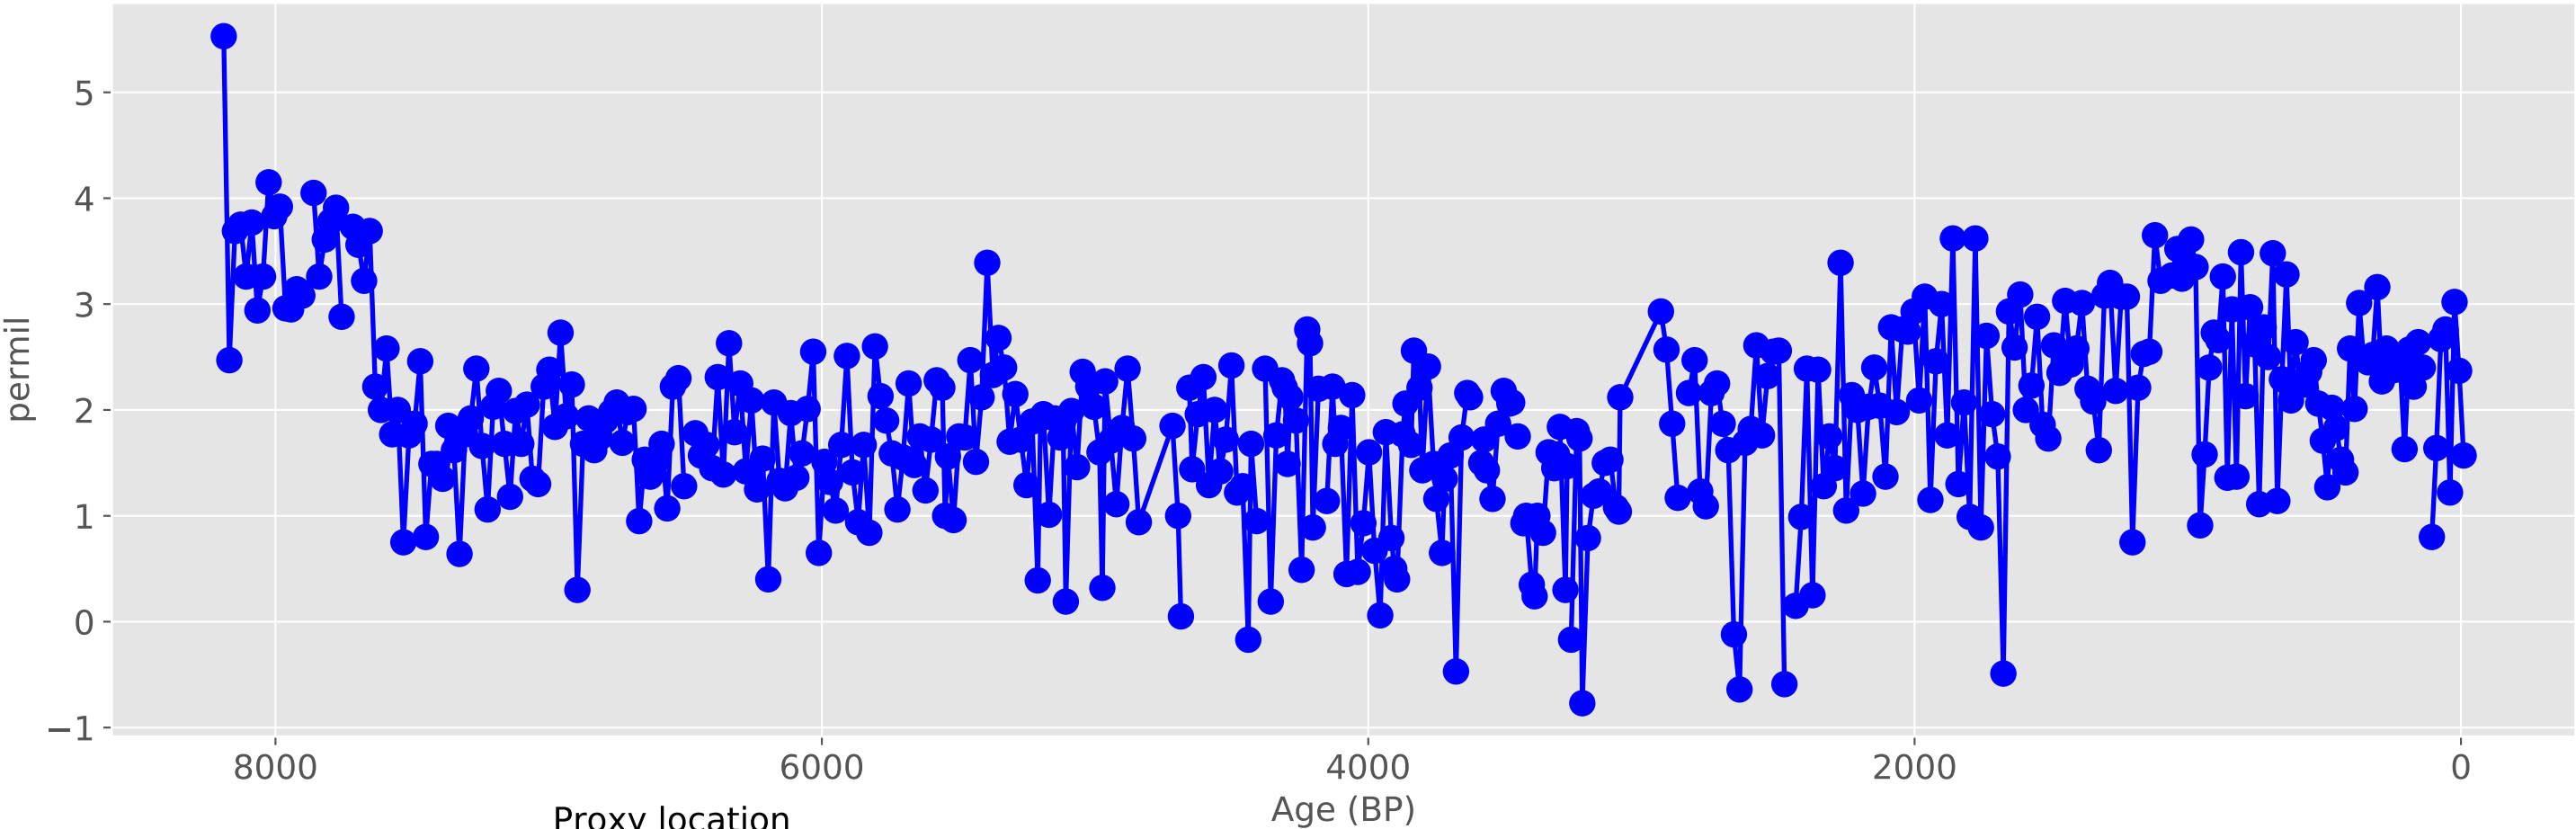

Proxy location  
(19.83° N, 88.75° W)



|                    |                                                                                            |
|--------------------|--------------------------------------------------------------------------------------------|
| Dataset name:      | Chichancanab.Hodell.1995                                                                   |
| Archive type:      | LakeSediment                                                                               |
| Proxy type:        | d18O                                                                                       |
| Variable name:     | d18O                                                                                       |
| Latitude (° N):    | 19.8333                                                                                    |
| Longitude (° E):   | -88.75                                                                                     |
| Elevation (m):     | 3.0                                                                                        |
| Interp. variable:  | P-E                                                                                        |
| Interp. detail:    | lake@surface                                                                               |
| Interp. season:    | summerOnly                                                                                 |
| Interp. direction: | negative                                                                                   |
| Pub. 1 title:      | Possible role of climate in the collapse of Classi...                                      |
| Pub. 1 authors:    | Hodell, David A.;Curtis, Jason H.;Brenner, Mark                                            |
| Pub. 1 year:       | 1995                                                                                       |
| Pub. 1 DOI:        | 10.1038/375391a0                                                                           |
| Original data URL: | <a href="http://www.ncdc.noaa.gov/paleo/study/5483">www.ncdc.noaa.gov/paleo/study/5483</a> |



Proxy data and metadata  
LakeSediment | d18O | LagunaDeAljojuca.Bhattacharya.2015 | LPD5627de74

Proxy time series: d18O

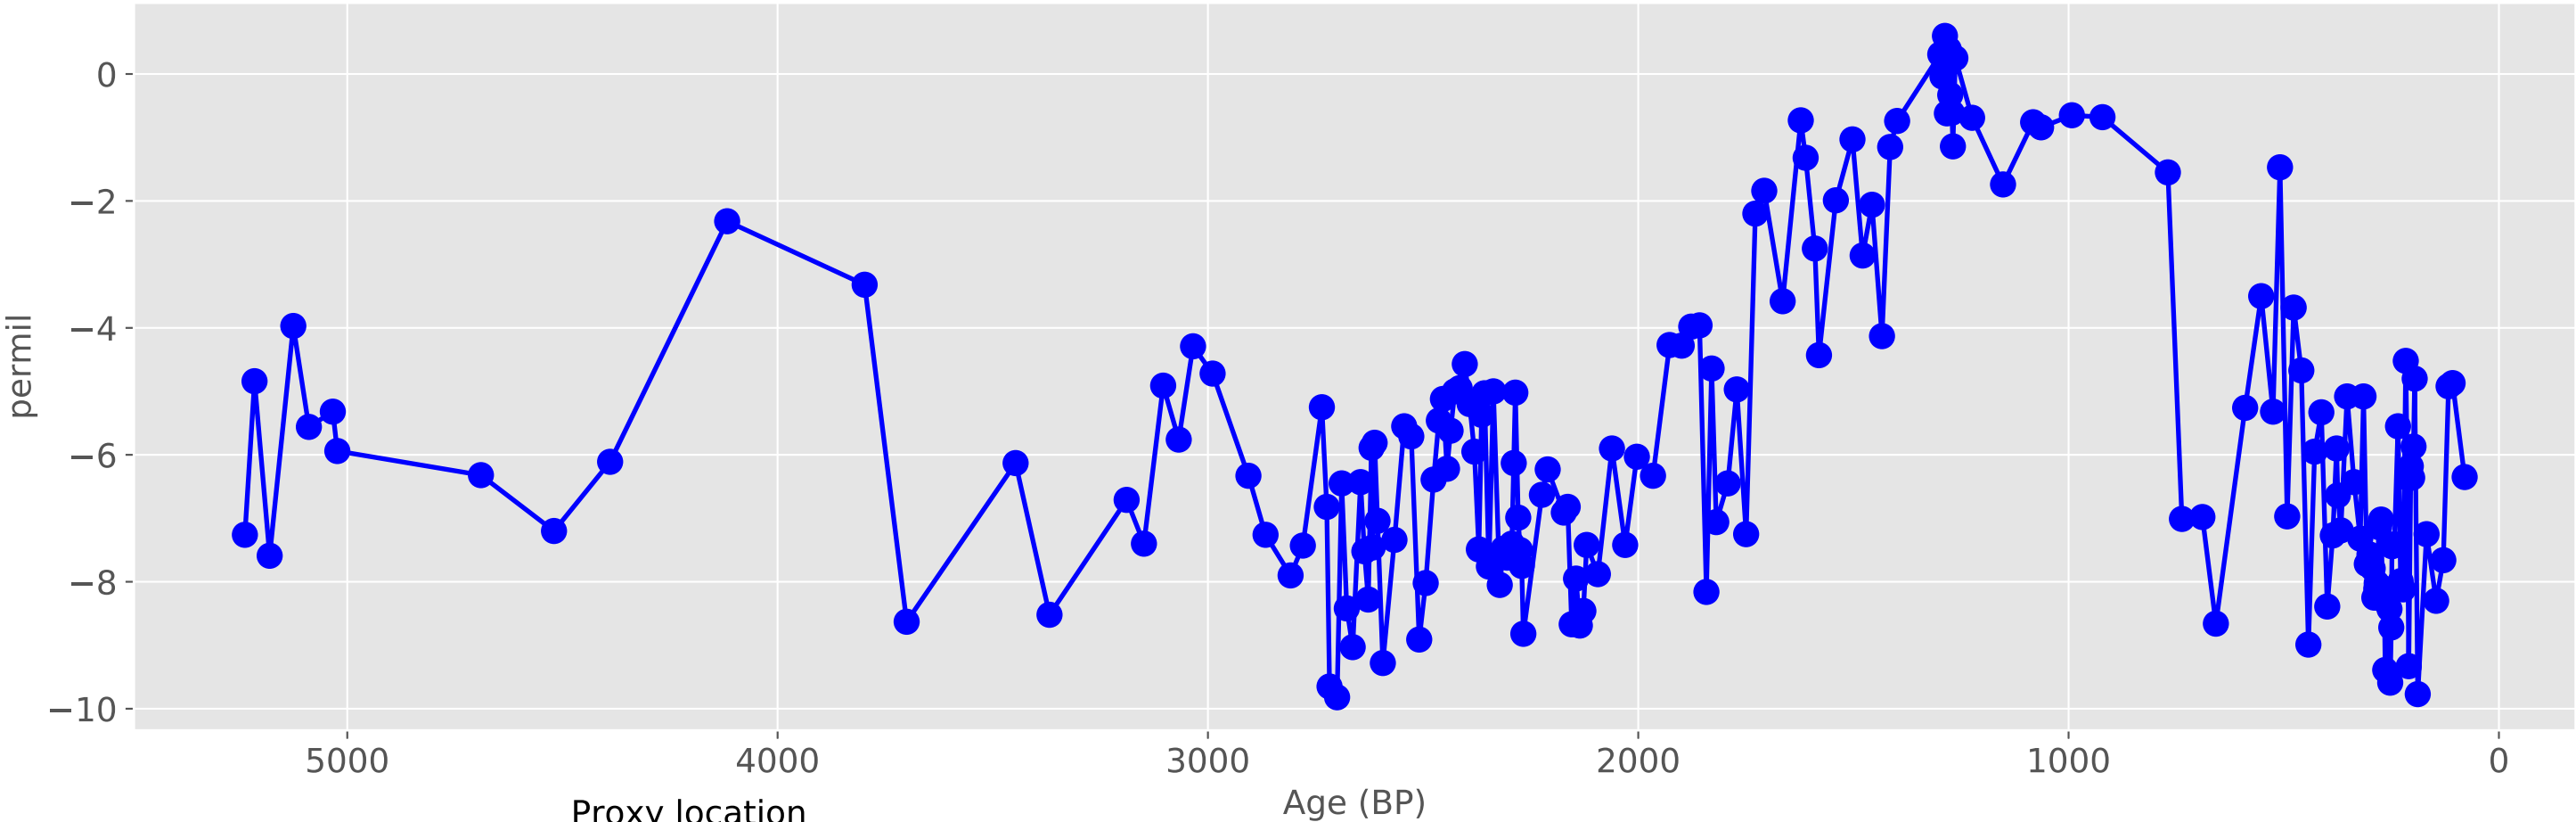

Proxy location  
(19.09 ° N, 97.53 ° W)

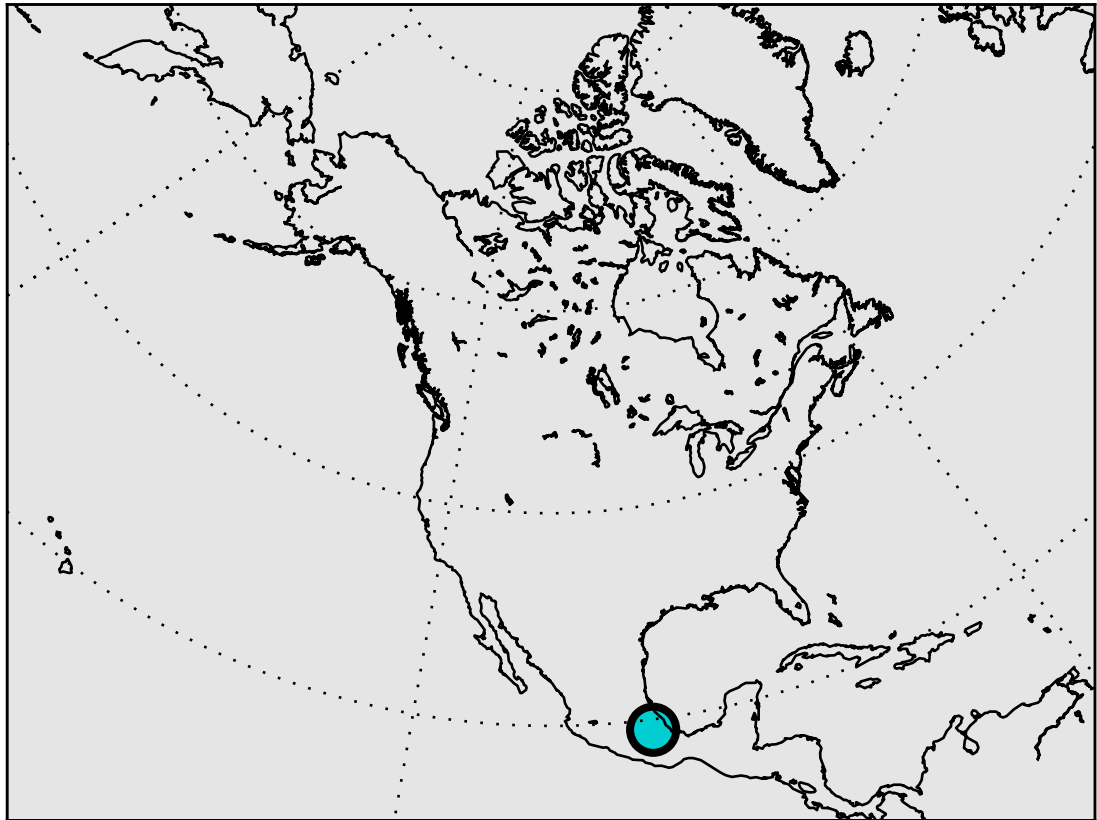

|                    |                                                                                              |
|--------------------|----------------------------------------------------------------------------------------------|
| Dataset name:      | LagunaDeAljojuca.Bhattacharya.2015                                                           |
| Archive type:      | LakeSediment                                                                                 |
| Proxy type:        | d18O                                                                                         |
| Variable name:     | d18O                                                                                         |
| Latitude ( ° N):   | 19.0915                                                                                      |
| Longitude ( ° E):  | -97.5338                                                                                     |
| Elevation (m):     | 2376.0                                                                                       |
| Interp. variable:  | P-E                                                                                          |
| Interp. detail:    | lake@surface                                                                                 |
| Interp. season:    | annual                                                                                       |
| Interp. direction: | negative                                                                                     |
| Pub. 1 title:      | Cultural implications of late Holocene climate cha...                                        |
| Pub. 1 authors:    | Bhattacharya, Tripti;Byrne, Roger;Böhnel, Harald;W...                                        |
| Pub. 1 year:       | 2015                                                                                         |
| Pub. 1 DOI:        | 10.1073/pnas.1405653112                                                                      |
| Original data URL: | <a href="http://www.ncdc.noaa.gov/paleo/study/17735">www.ncdc.noaa.gov/paleo/study/17735</a> |

Proxy data and metadata

LakeSediment | d18O | LagoPuertoArturo.Wahl.2014 | WEBd1a317bc

Proxy time series: d18O

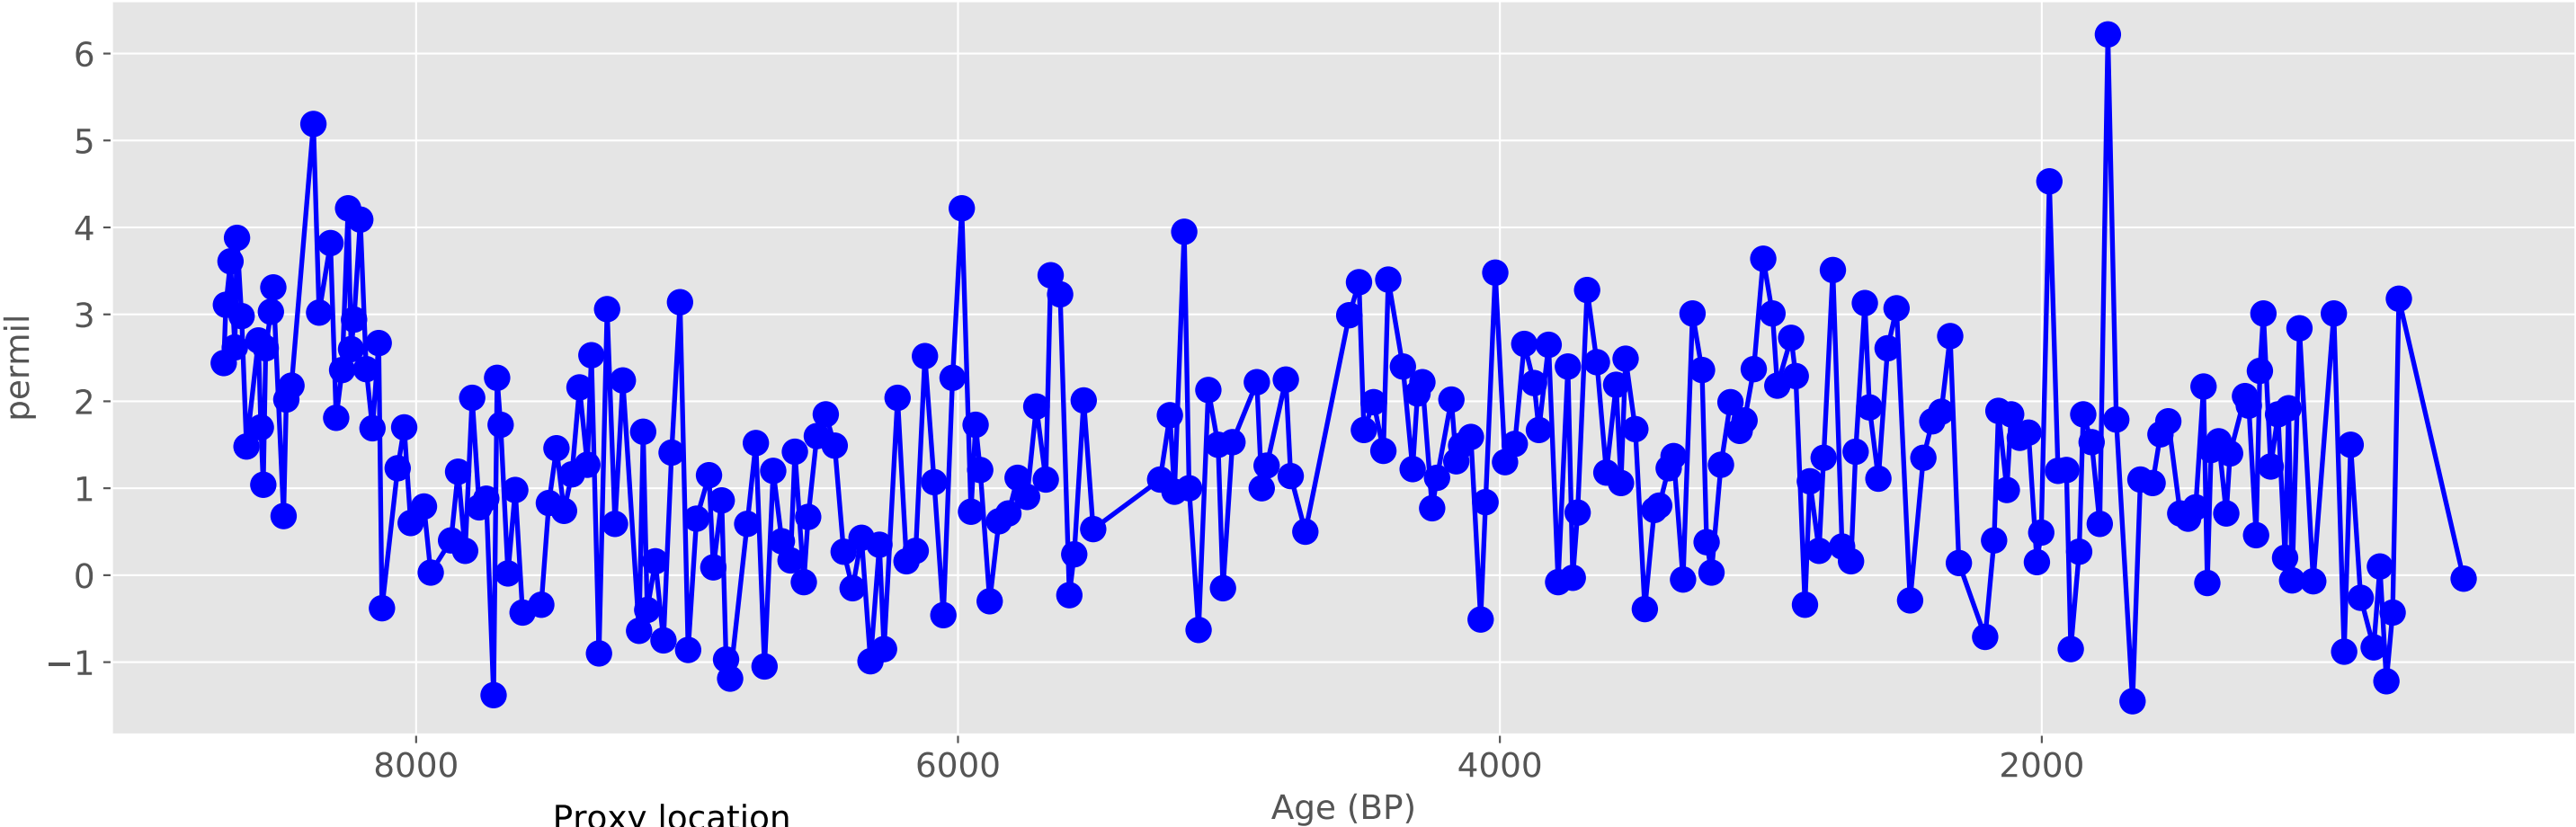

Proxy location  
(17.53° N, 90.18° W)

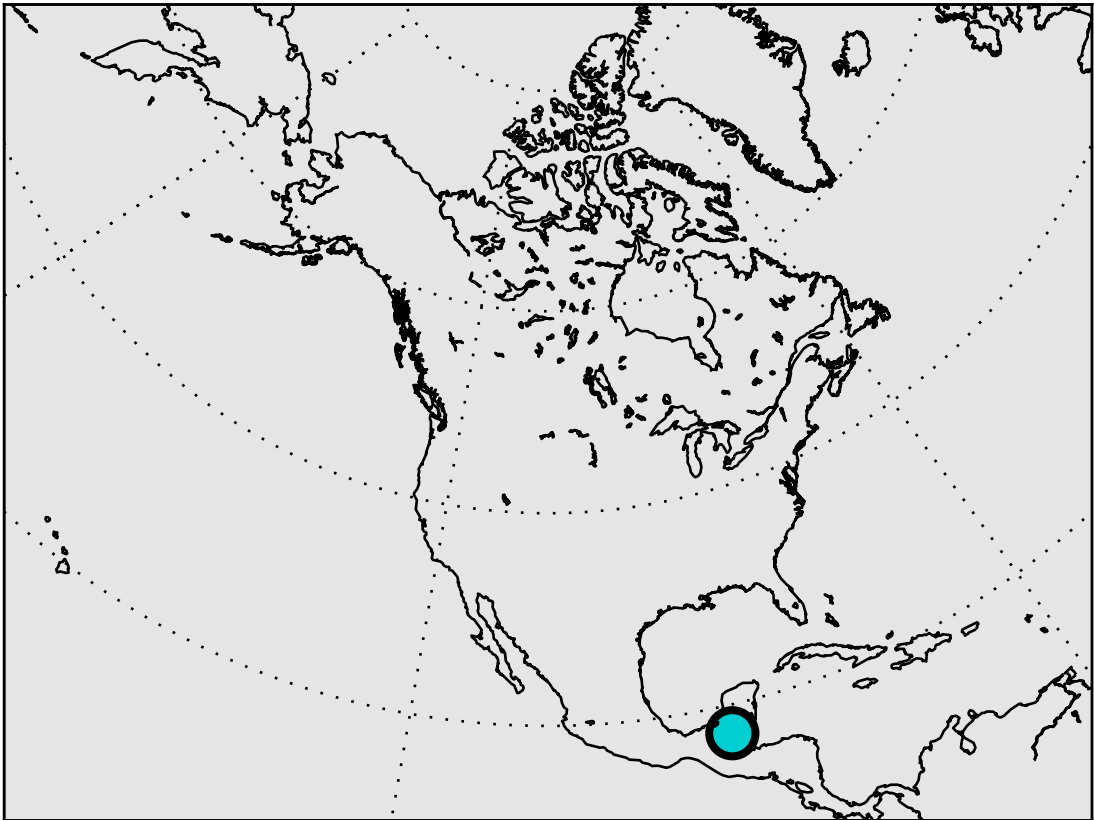

|                    |                                                       |
|--------------------|-------------------------------------------------------|
| Dataset name:      | LagoPuertoArturo.Wahl.2014                            |
| Archive type:      | LakeSediment                                          |
| Proxy type:        | d18O                                                  |
| Variable name:     | d18O                                                  |
| Latitude (° N):    | 17.533                                                |
| Longitude (° E):   | -90.183                                               |
| Elevation (m):     | 179.0                                                 |
| Interp. variable:  | P-E                                                   |
| Interp. detail:    | lake@surface                                          |
| Interp. season:    | annual                                                |
| Interp. direction: | negative                                              |
| Pub. 1 title:      | An 8700 year paleoclimate reconstruction from the ... |
| Pub. 1 authors:    | Wahl, David;Byrne, Roger;Anderson, Lysanna            |
| Pub. 1 year:       | 2014                                                  |
| Pub. 1 DOI:        | 10.1016/j.quascirev.2014.08.004                       |
| Original data URL: | wNA                                                   |

Proxy data and metadata

LakeSediment | diatom | FelkerLake.Galloway.2011 | WEB30fe1262

Proxy time series: lakeLevel

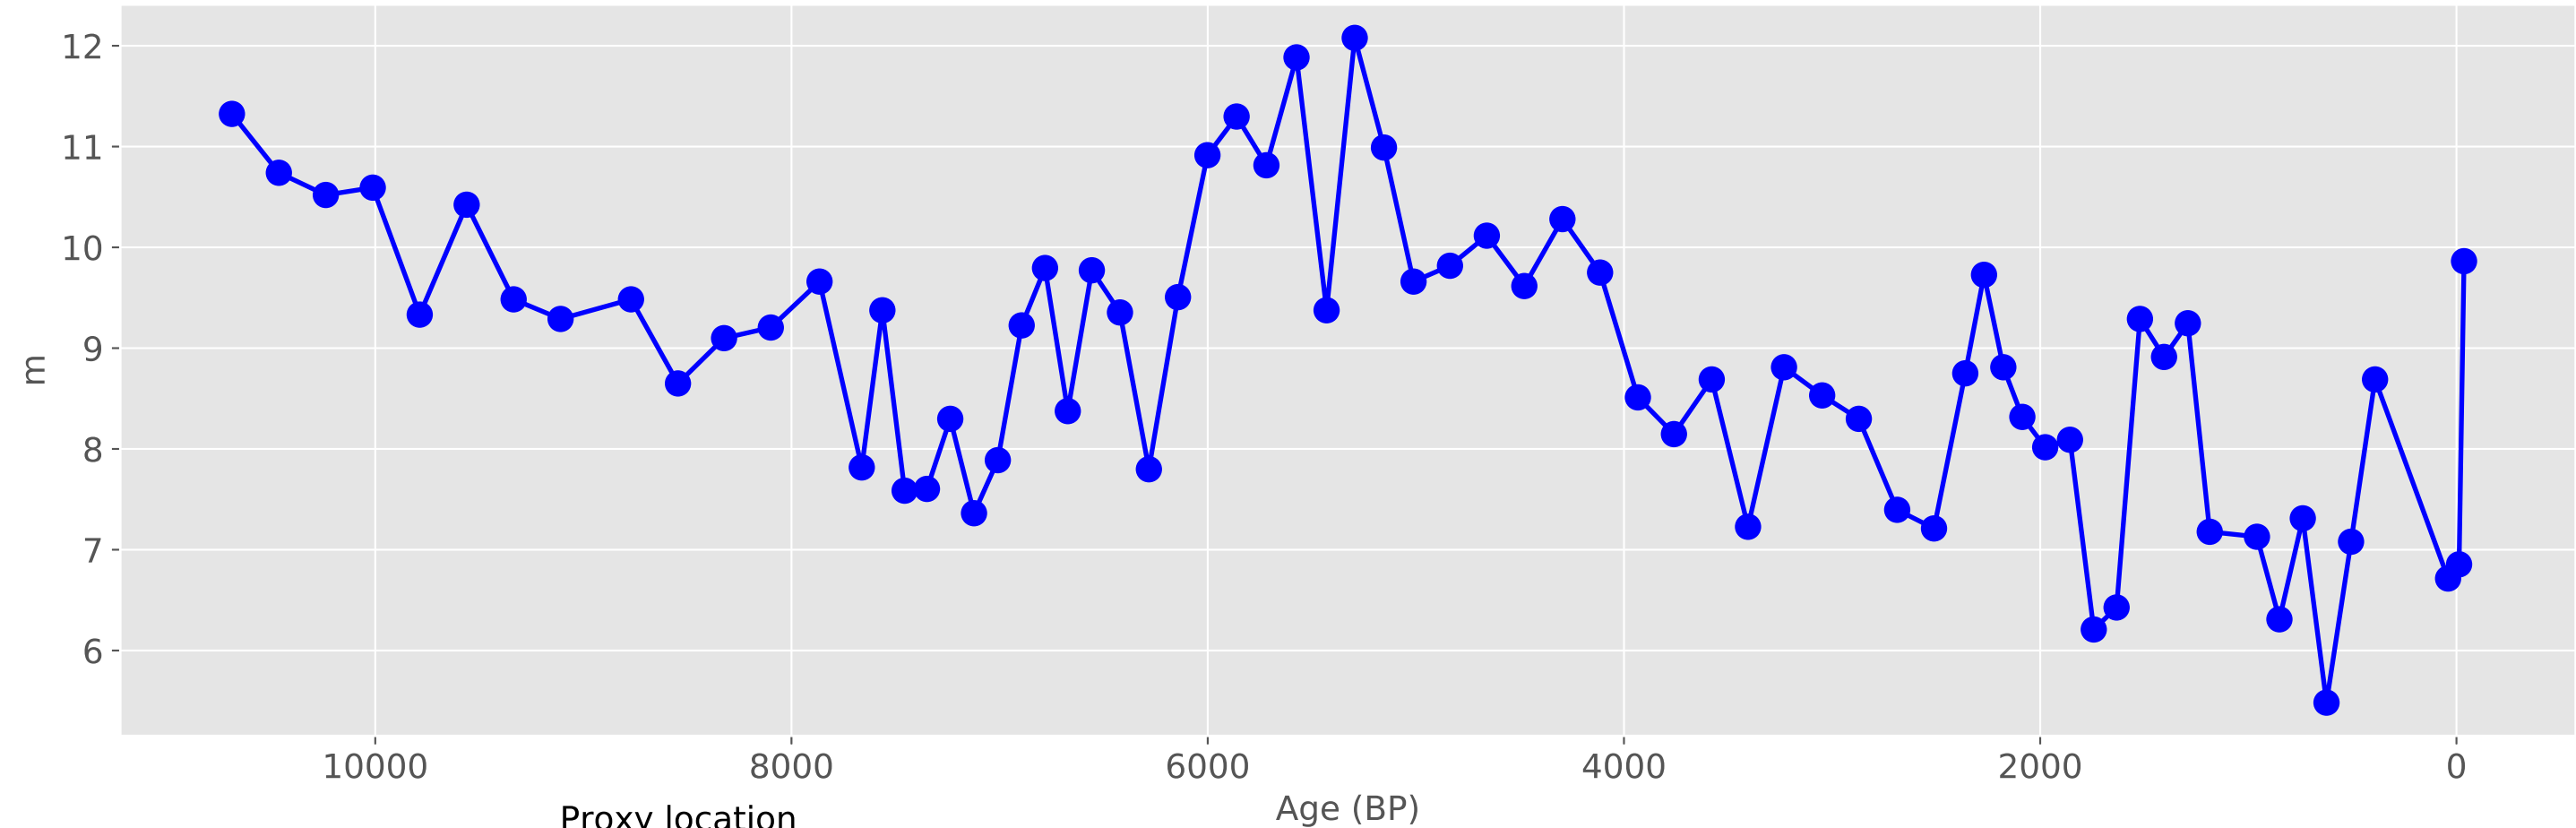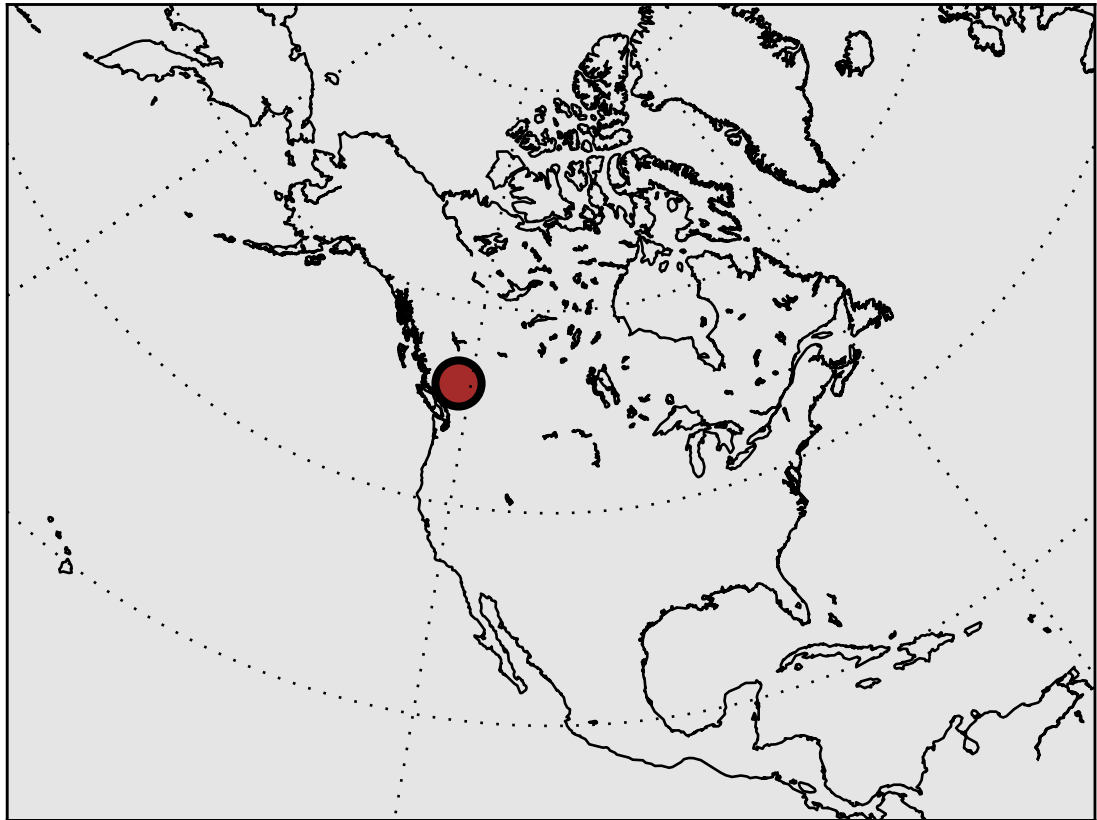

|                    |                                                       |
|--------------------|-------------------------------------------------------|
| Dataset name:      | FelkerLake.Galloway.2011                              |
| Archive type:      | LakeSediment                                          |
| Proxy type:        | diatom                                                |
| Variable name:     | lakeLevel                                             |
| Latitude ( ° N):   | 51.95                                                 |
| Longitude ( ° E):  | -121.9953                                             |
| Elevation (m):     | 862.0                                                 |
| Interp. variable:  | P-E                                                   |
| Interp. detail:    | lakeLevel@surface                                     |
| Interp. season:    | annual                                                |
| Interp. direction: | positive                                              |
| Pub. 1 title:      | Hydrological change in the central interior of Bri... |
| Pub. 1 authors:    | Galloway, Jennifer M.;Lenny, Adam M.;Cumming, Bria... |
| Pub. 1 year:       | 2011                                                  |
| Pub. 1 DOI:        | 10.1007/s10933-010-9490-9                             |
| Original data URL: | wNAm                                                  |

Proxy data and metadata  
**LakeSediment | diatom | FelkerLake.Galloway.2011 | WEBcfa56c2c**

Proxy time series: salinity

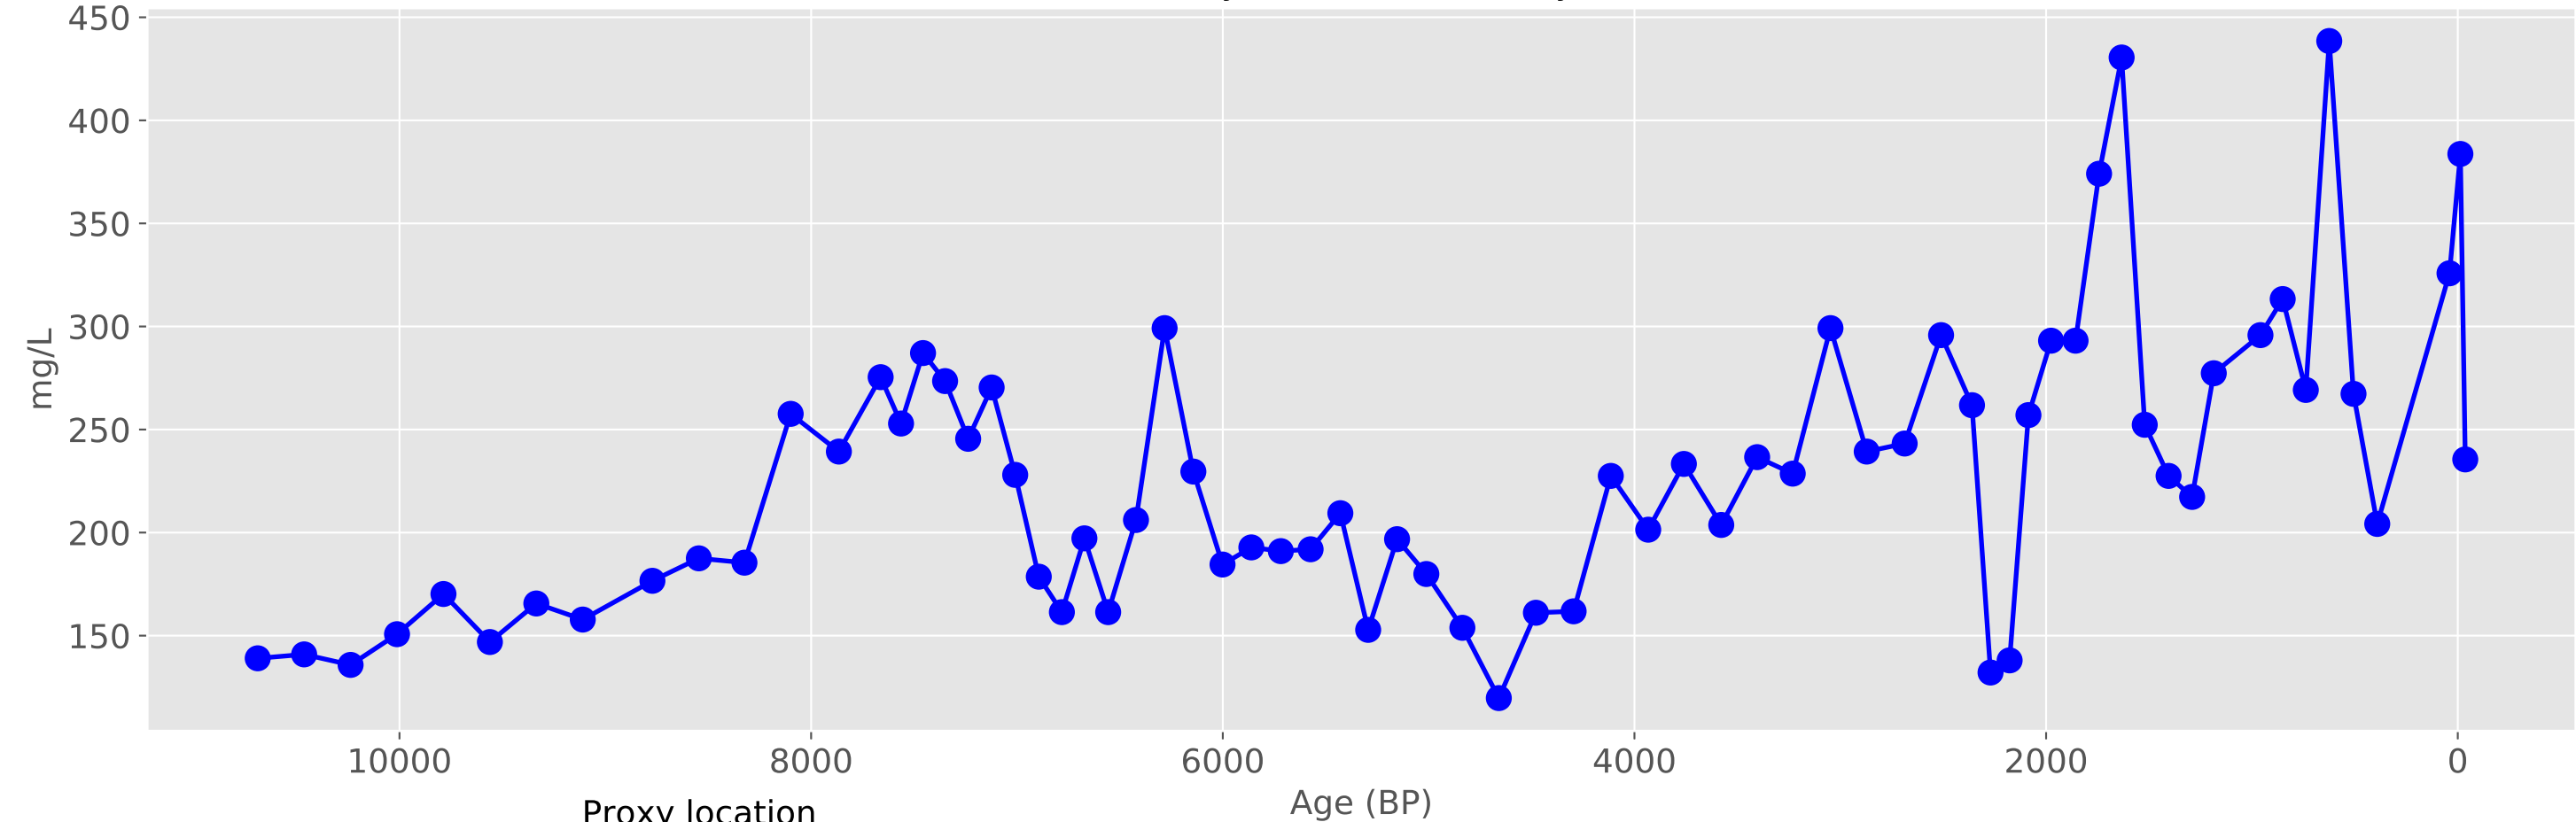

Proxy location  
(51.95 ° N, 122.00 ° W)



|                    |                                                       |
|--------------------|-------------------------------------------------------|
| Dataset name:      | FelkerLake.Galloway.2011                              |
| Archive type:      | LakeSediment                                          |
| Proxy type:        | diatom                                                |
| Variable name:     | salinity                                              |
| Latitude ( ° N):   | 51.95                                                 |
| Longitude ( ° E):  | -121.9953                                             |
| Elevation (m):     | 862.0                                                 |
| Interp. variable:  | P-E                                                   |
| Interp. detail:    | lake@surface                                          |
| Interp. season:    | annual                                                |
| Interp. direction: | negative                                              |
| Pub. 1 title:      | Hydrological change in the central interior of Bri... |
| Pub. 1 authors:    | Galloway, Jennifer M.;Lenny, Adam M.;Cumming, Bria... |
| Pub. 1 year:       | 2011                                                  |
| Pub. 1 DOI:        | 10.1007/s10933-010-9490-9                             |
| Original data URL: | wNAm                                                  |

Proxy data and metadata

LakeSediment | diatom | Big.Cumming.2002 | NAm2kHydro030

Proxy time series: lakeLevel

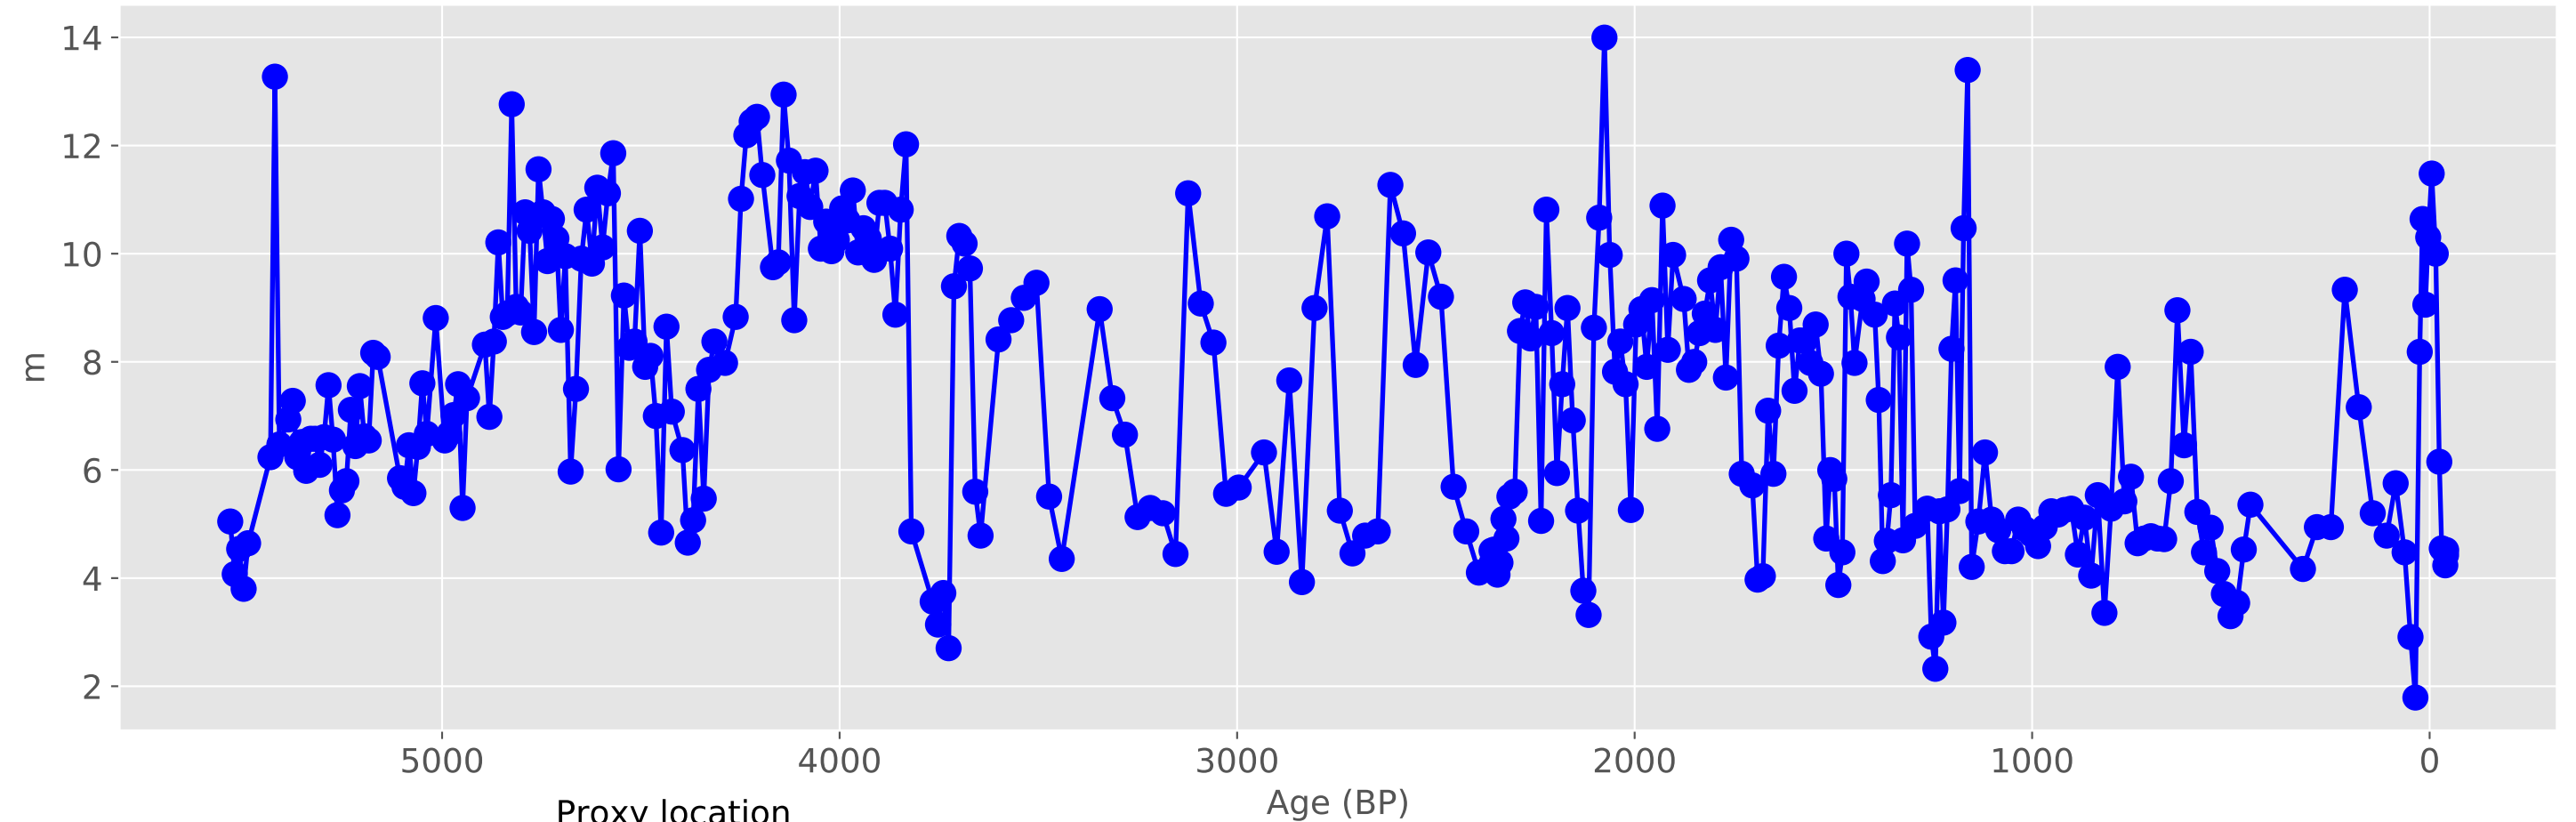

Proxy location  
(51.67° N, 121.45° W)

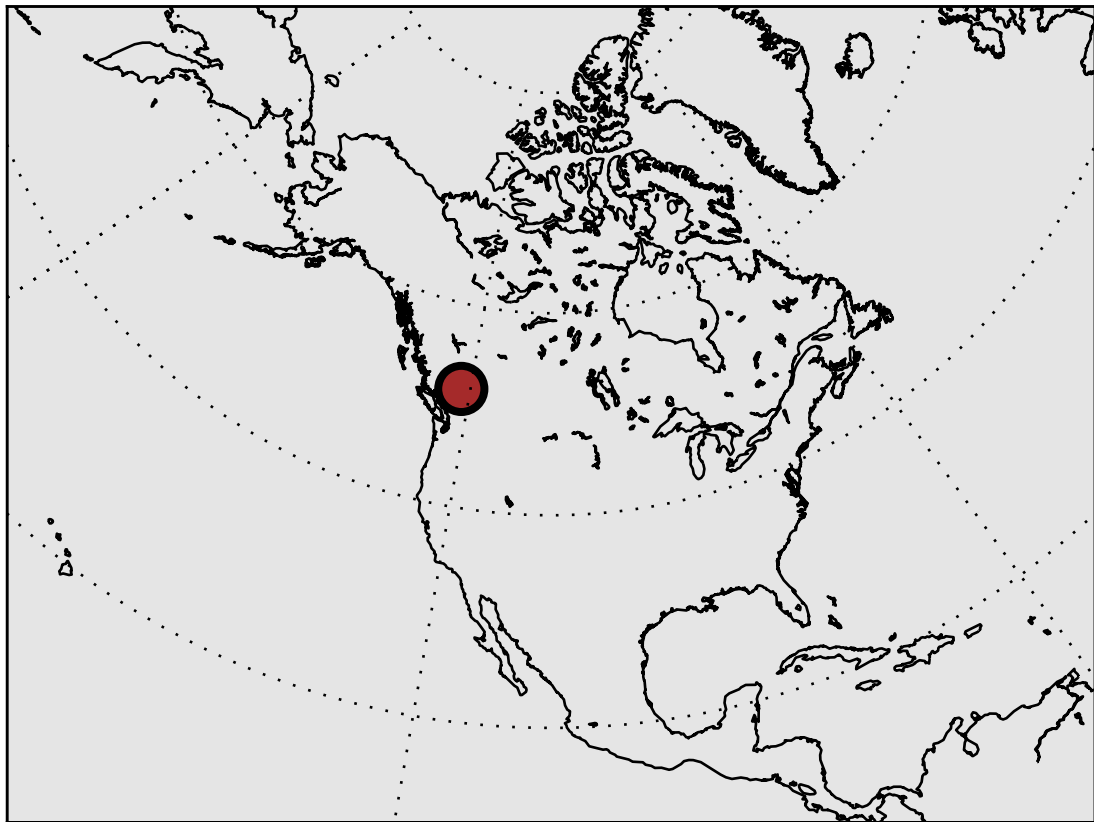

|                    |                                                                                              |
|--------------------|----------------------------------------------------------------------------------------------|
| Dataset name:      | Big.Cumming.2002                                                                             |
| Archive type:      | LakeSediment                                                                                 |
| Proxy type:        | diatom                                                                                       |
| Variable name:     | lakeLevel                                                                                    |
| Latitude (° N):    | 51.668                                                                                       |
| Longitude (° E):   | -121.45                                                                                      |
| Elevation (m):     | 1030.0                                                                                       |
| Interp. variable:  | P-E                                                                                          |
| Interp. detail:    | lakeLevel@surface                                                                            |
| Interp. season:    | annual                                                                                       |
| Interp. direction: | positive                                                                                     |
| Pub. 1 title:      | Persistent millennial-scale shifts in moisture reg...                                        |
| Pub. 1 authors:    | Cumming, B. F.                                                                               |
| Pub. 1 year:       | 2002                                                                                         |
| Pub. 1 DOI:        | 10.1073/pnas.252603099                                                                       |
| Original data URL: | <a href="http://www.ncdc.noaa.gov/paleo/study/23089">www.ncdc.noaa.gov/paleo/study/23089</a> |

Proxy data and metadata  
LakeSediment | diatom | Big.Cumming.2002 | WEB6287c949

Proxy time series: salinity

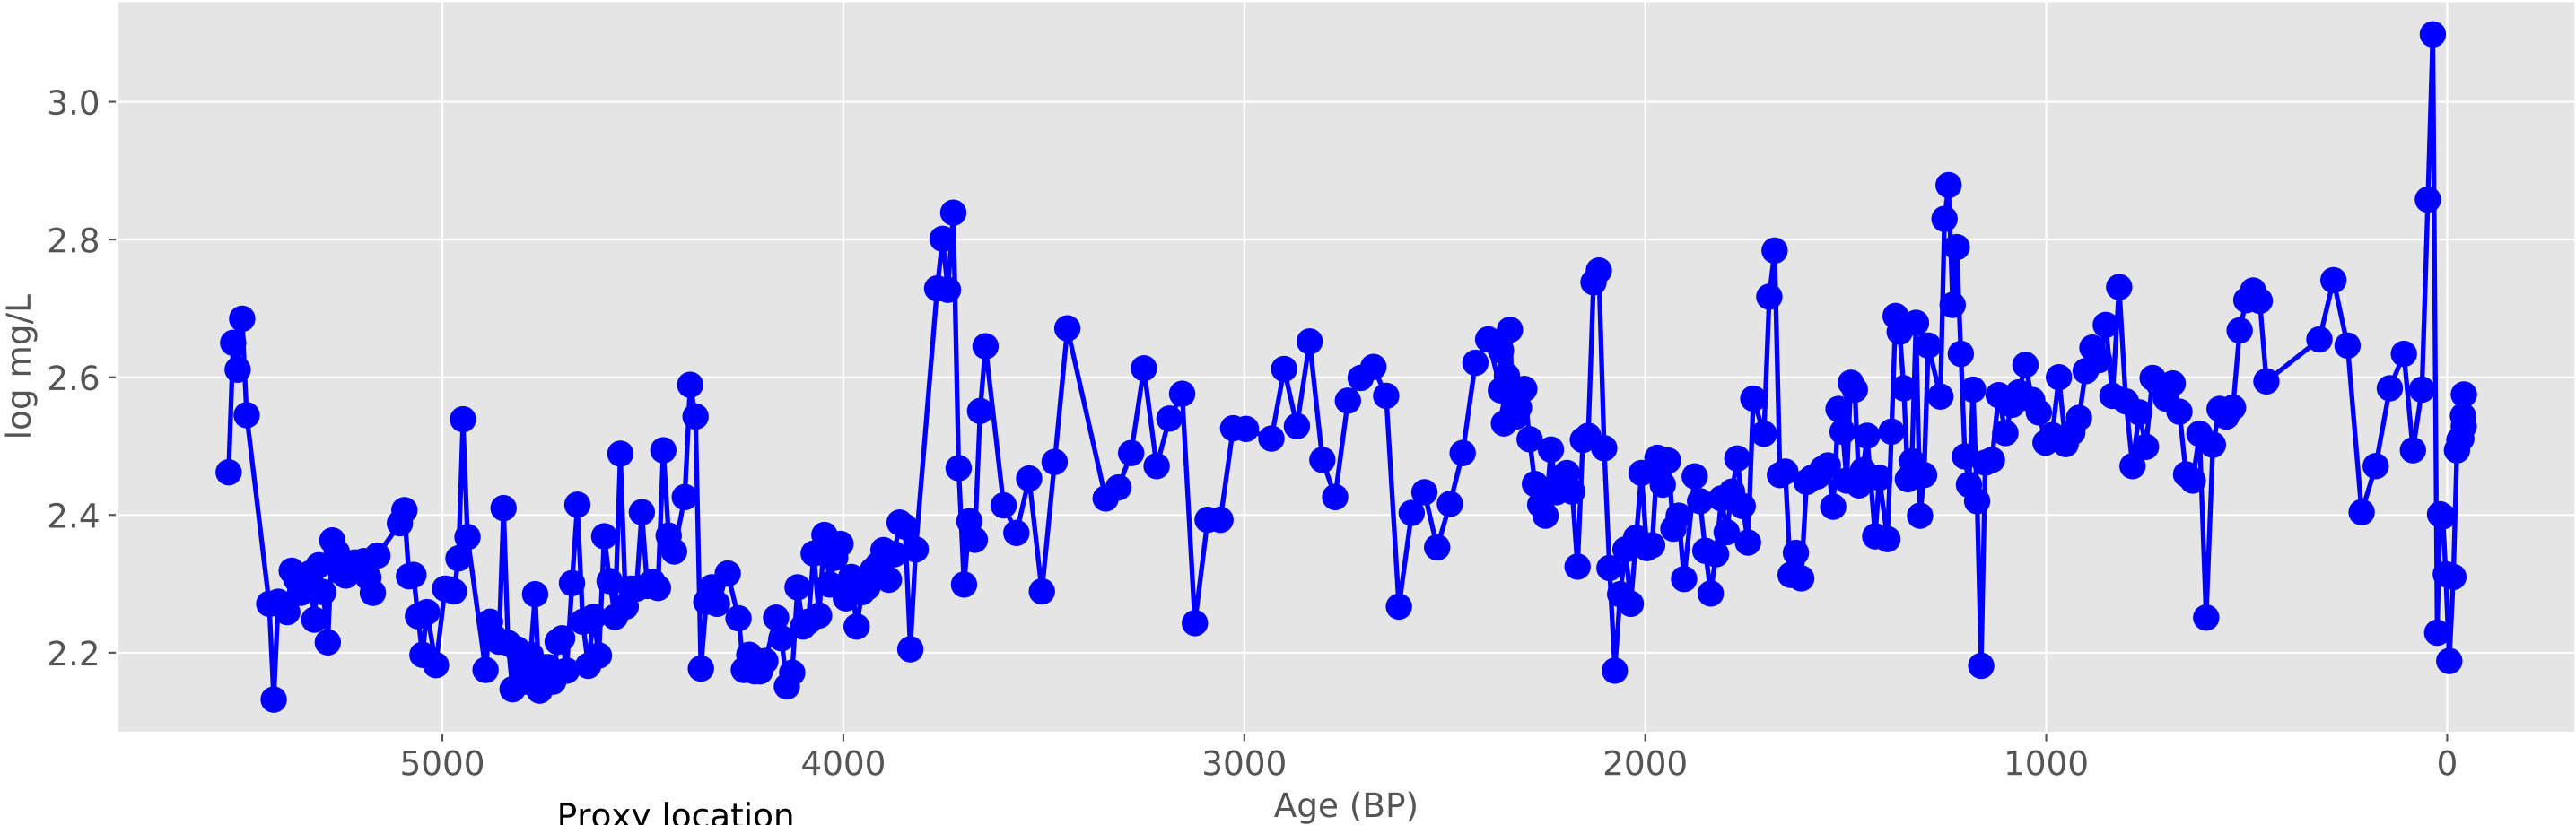

Proxy location  
(51.67 ° N, 121.45 ° W)

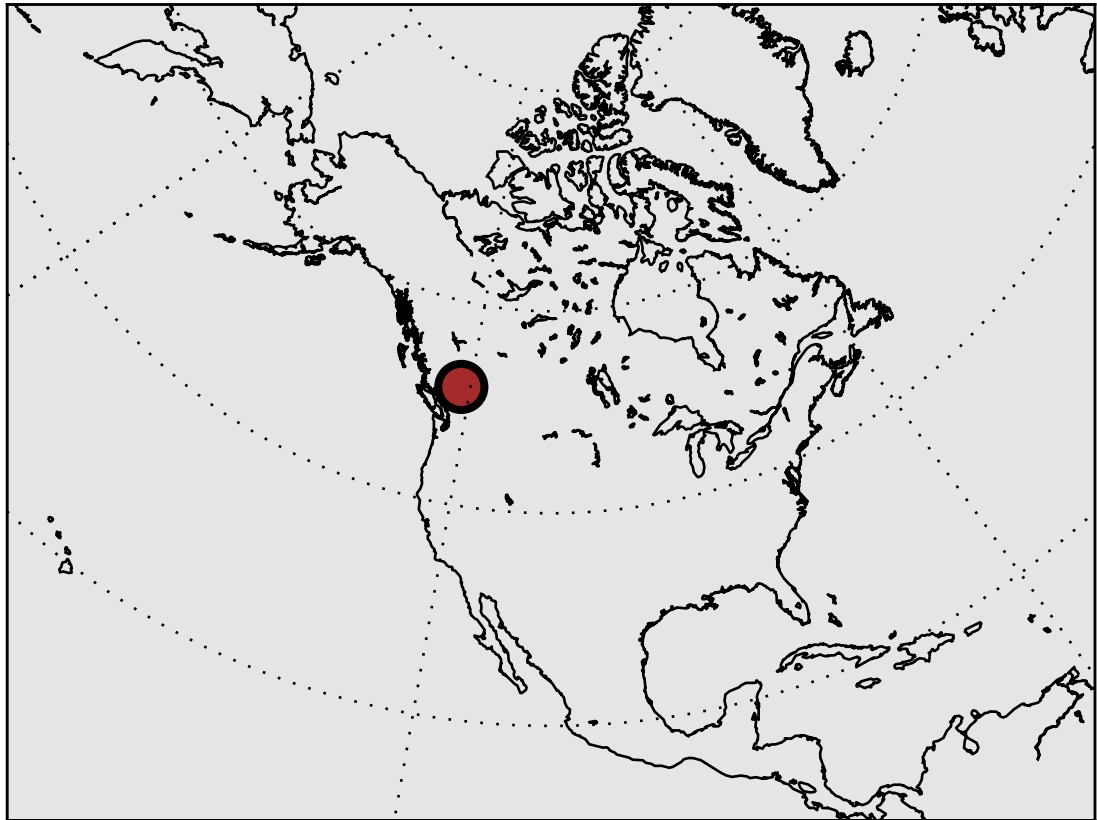

|                    |                                                                                              |
|--------------------|----------------------------------------------------------------------------------------------|
| Dataset name:      | Big.Cumming.2002                                                                             |
| Archive type:      | LakeSediment                                                                                 |
| Proxy type:        | diatom                                                                                       |
| Variable name:     | salinity                                                                                     |
| Latitude ( ° N):   | 51.668                                                                                       |
| Longitude ( ° E):  | -121.45                                                                                      |
| Elevation (m):     | 1030.0                                                                                       |
| Interp. variable:  | P-E                                                                                          |
| Interp. detail:    | lakeSalinity                                                                                 |
| Interp. season:    | annual                                                                                       |
| Interp. direction: | negative                                                                                     |
| Pub. 1 title:      | Persistent millennial-scale shifts in moisture reg...                                        |
| Pub. 1 authors:    | Cumming, B. F.                                                                               |
| Pub. 1 year:       | 2002                                                                                         |
| Pub. 1 DOI:        | 10.1073/pnas.252603099                                                                       |
| Original data URL: | <a href="http://www.ncdc.noaa.gov/paleo/study/23089">www.ncdc.noaa.gov/paleo/study/23089</a> |



Proxy data and metadata  
**LakeSediment | diatom | OroLake.Michels.2007 | GH0c323a35**

Proxy time series: logSalinity

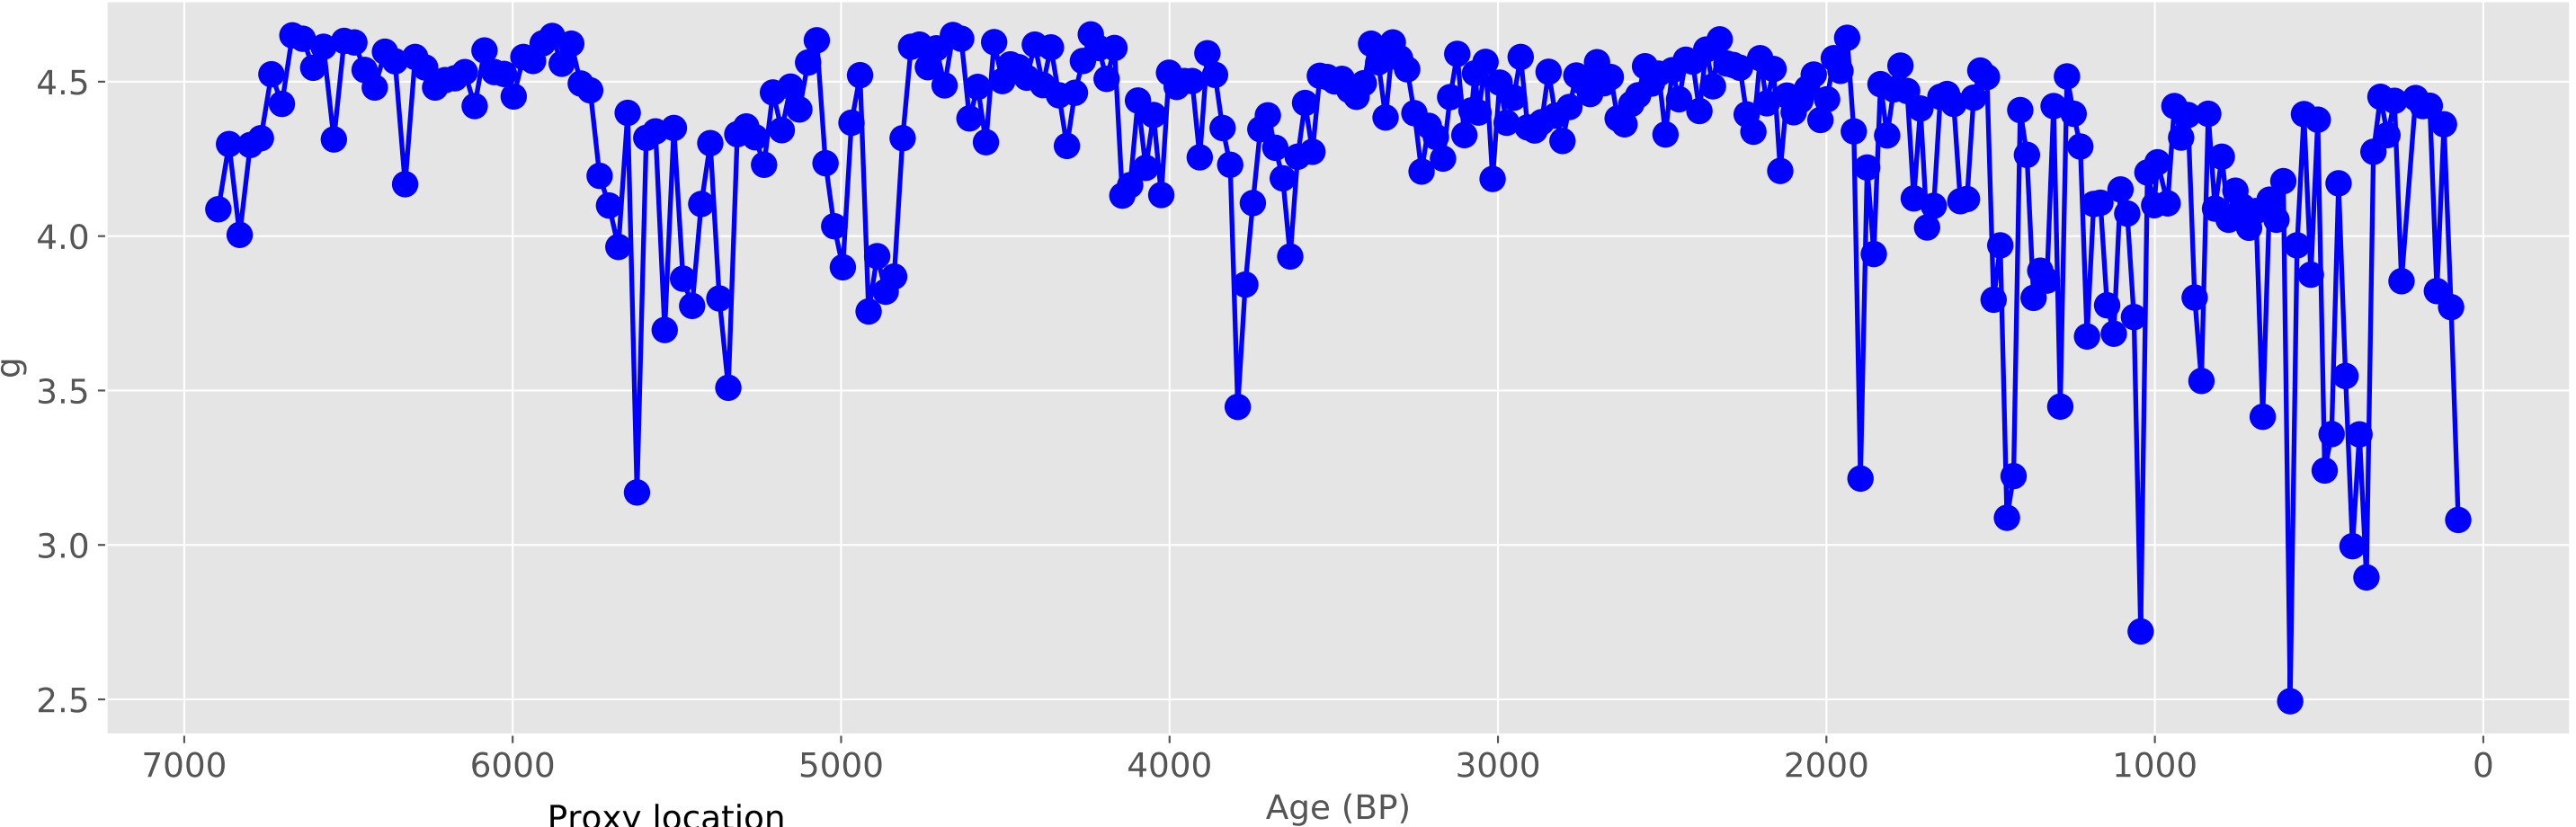

Proxy location  
(49.78 ° N, 105.35 ° W)

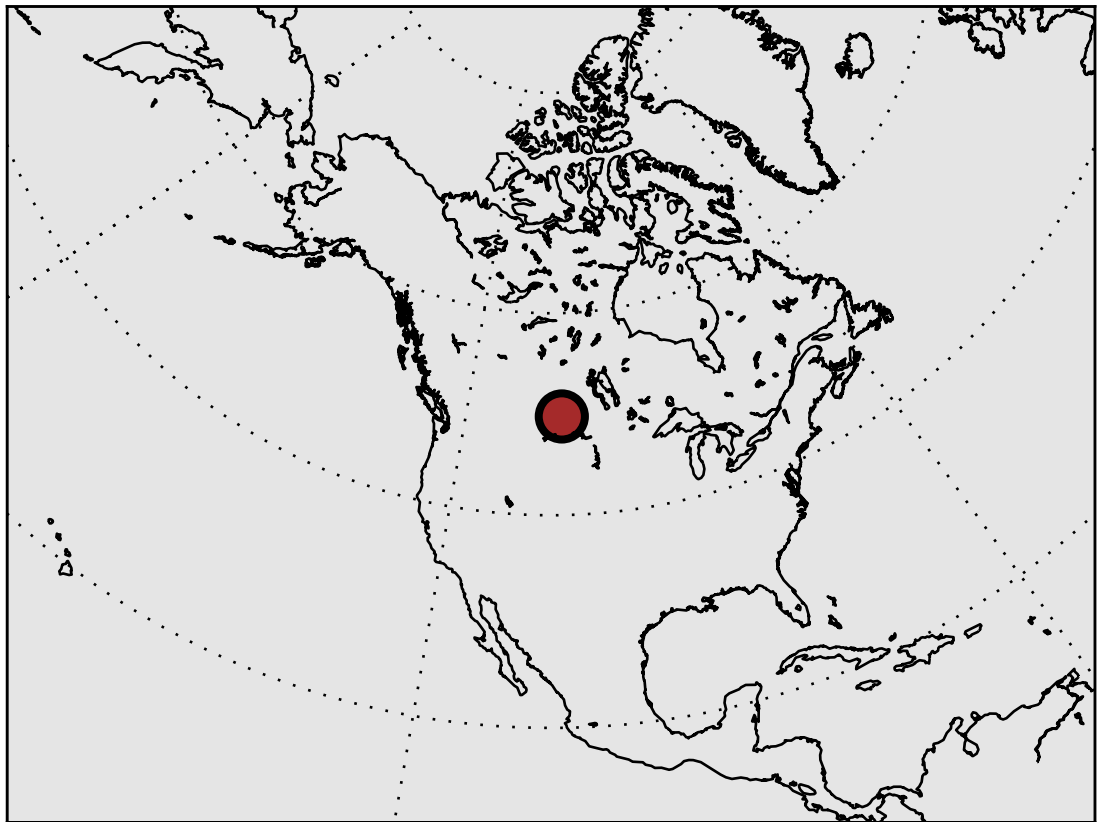

|                    |                                                                                              |
|--------------------|----------------------------------------------------------------------------------------------|
| Dataset name:      | OroLake.Michels.2007                                                                         |
| Archive type:      | LakeSediment                                                                                 |
| Proxy type:        | diatom                                                                                       |
| Variable name:     | logSalinity                                                                                  |
| Latitude ( ° N):   | 49.7842                                                                                      |
| Longitude ( ° E):  | -105.3487                                                                                    |
| Elevation (m):     | 686.0                                                                                        |
| Interp. variable:  | P-E                                                                                          |
| Interp. detail:    | lakeSalinity                                                                                 |
| Interp. season:    | annual                                                                                       |
| Interp. direction: | negative                                                                                     |
| Pub. 1 title:      | Multidecadal to millennial-scale shifts in drought...                                        |
| Pub. 1 authors:    | MICHELS, ASTRID;LAIRD, KATHLEEN R.;WILSON, SUSAN E...                                        |
| Pub. 1 year:       | 2007                                                                                         |
| Pub. 1 DOI:        | 10.1111/j.1365-2486.2007.01367.x                                                             |
| Original data URL: | <a href="http://www.ncdc.noaa.gov/paleo/study/23073">www.ncdc.noaa.gov/paleo/study/23073</a> |

Proxy data and metadata  
LakeSediment | diatom | FoyLake.Stone.2008 | GH96f3a962

Proxy time series: benth

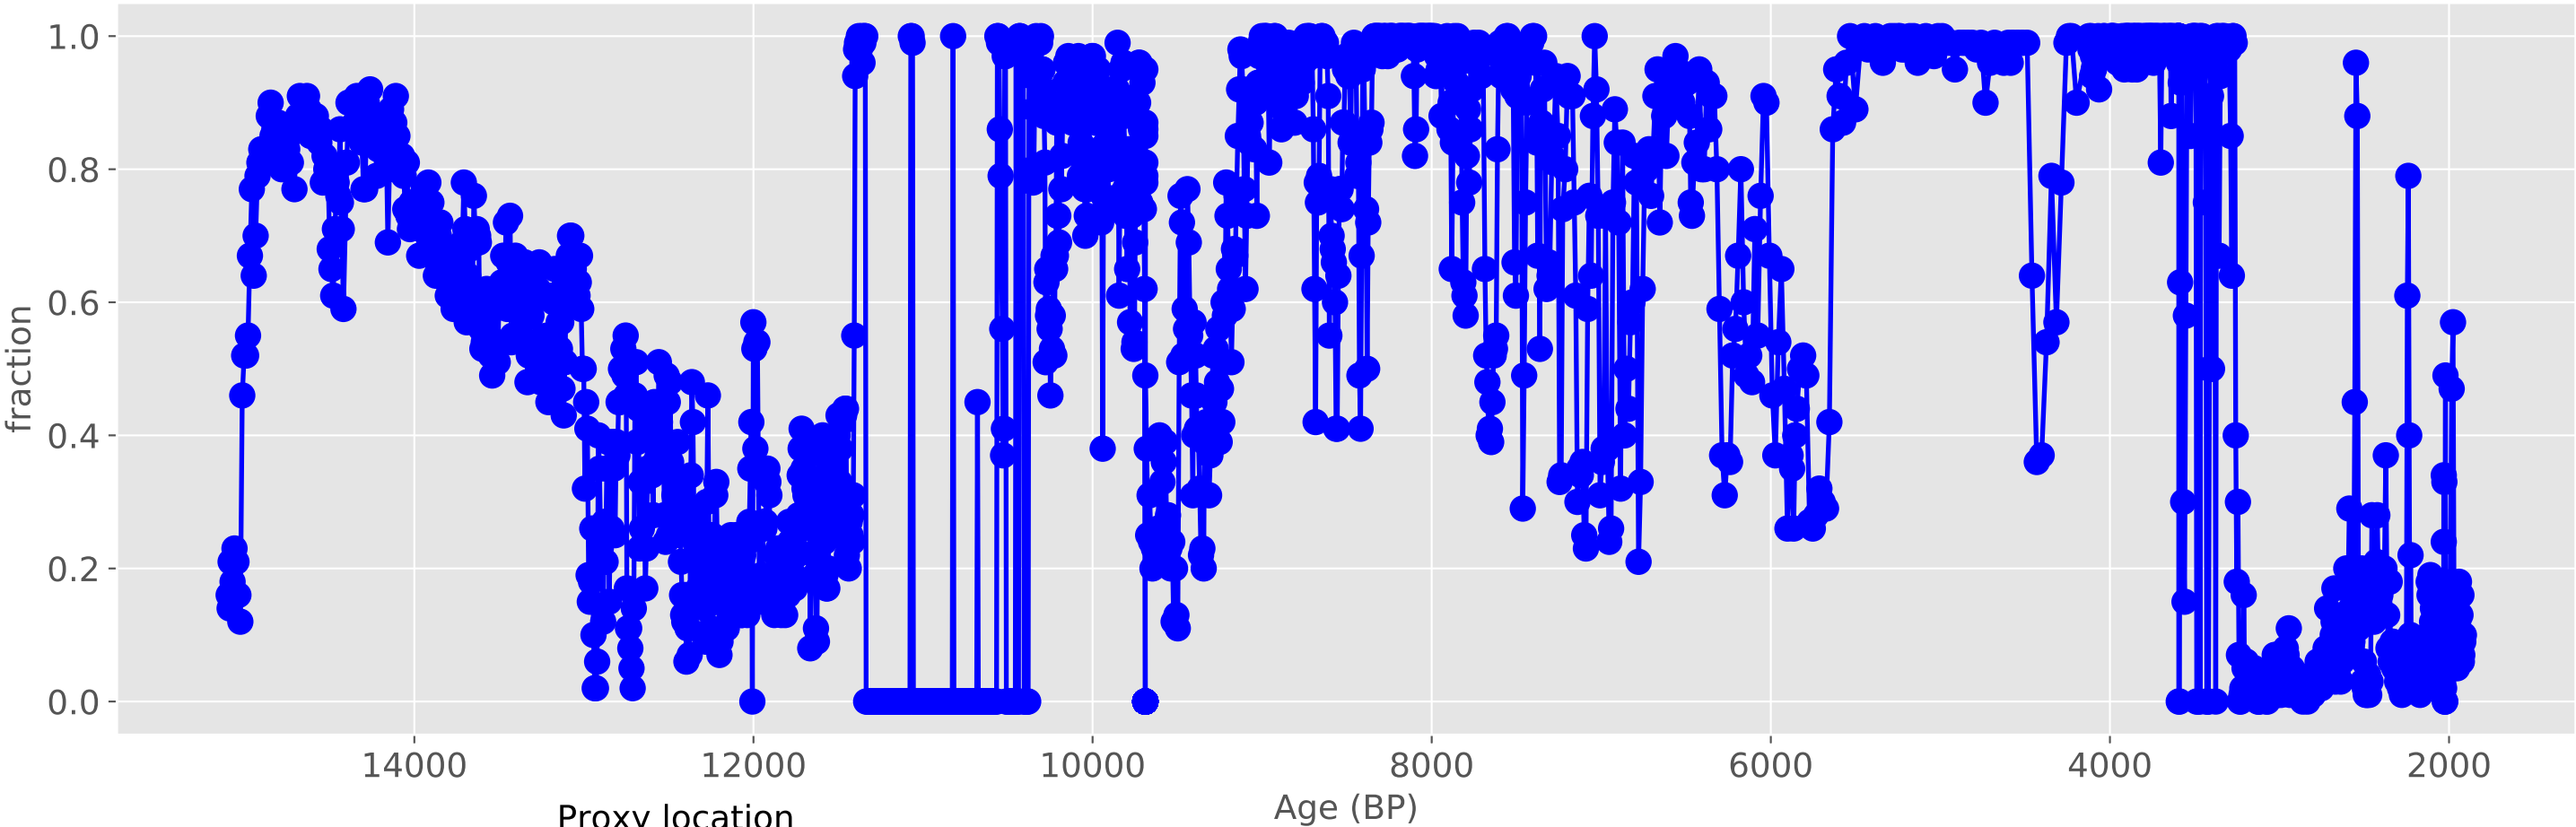

Proxy location  
(48.20 ° N, 114.40 ° W)

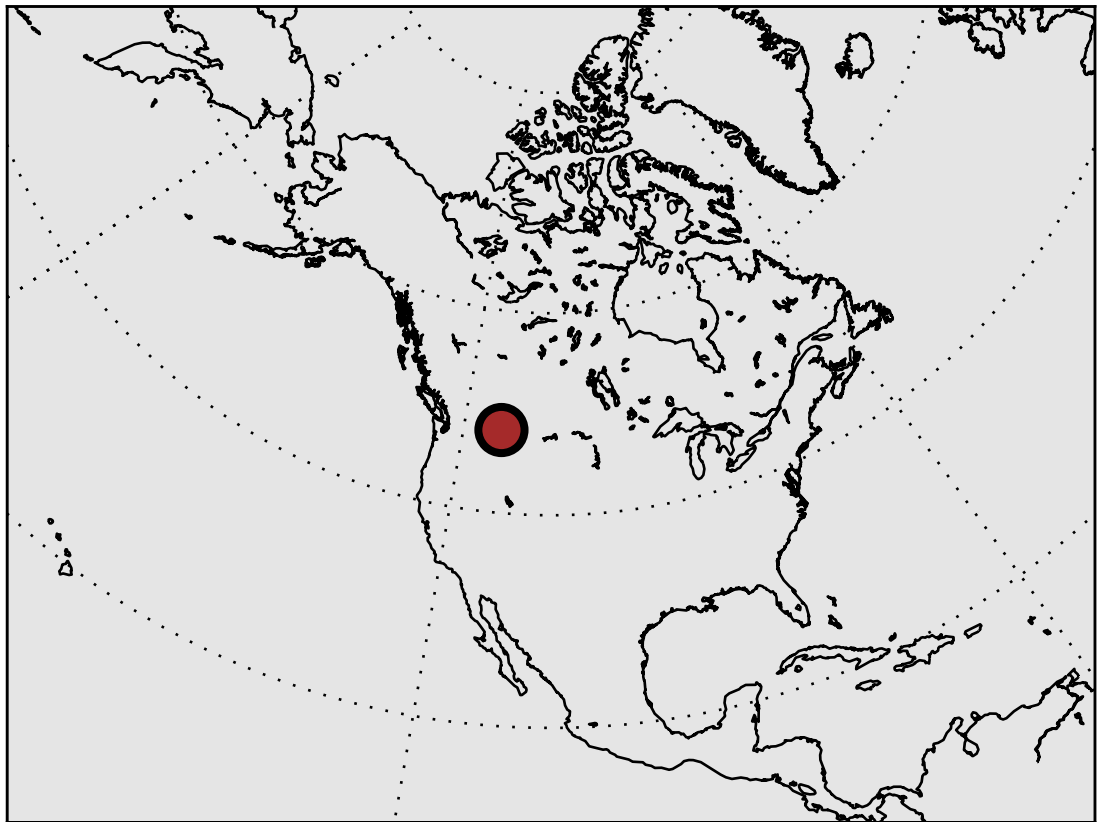

|                    |                                                                                            |
|--------------------|--------------------------------------------------------------------------------------------|
| Dataset name:      | FoyLake.Stone.2008                                                                         |
| Archive type:      | LakeSediment                                                                               |
| Proxy type:        | diatom                                                                                     |
| Variable name:     | benth                                                                                      |
| Latitude ( ° N):   | 48.2                                                                                       |
| Longitude ( ° E):  | -114.4                                                                                     |
| Elevation (m):     | 1006.0                                                                                     |
| Interp. variable:  | P-E                                                                                        |
| Interp. detail:    | lakeLevel@surface                                                                          |
| Interp. season:    | annual                                                                                     |
| Interp. direction: | negative                                                                                   |
| Pub. 1 title:      | Multidecadal drought and Holocene climate instabil...                                      |
| Pub. 1 authors:    | Stone, Jeffery R.;Fritz, Sherilyn C.                                                       |
| Pub. 1 year:       | 2006                                                                                       |
| Pub. 1 DOI:        | 10.1130/G22225.1                                                                           |
| Original data URL: | <a href="http://www.ncdc.noaa.gov/paleo/study/6188">www.ncdc.noaa.gov/paleo/study/6188</a> |

Proxy data and metadata

LakeSediment | diatom | BeaverLake.Schmieder.2011 | LPDe897b7c7

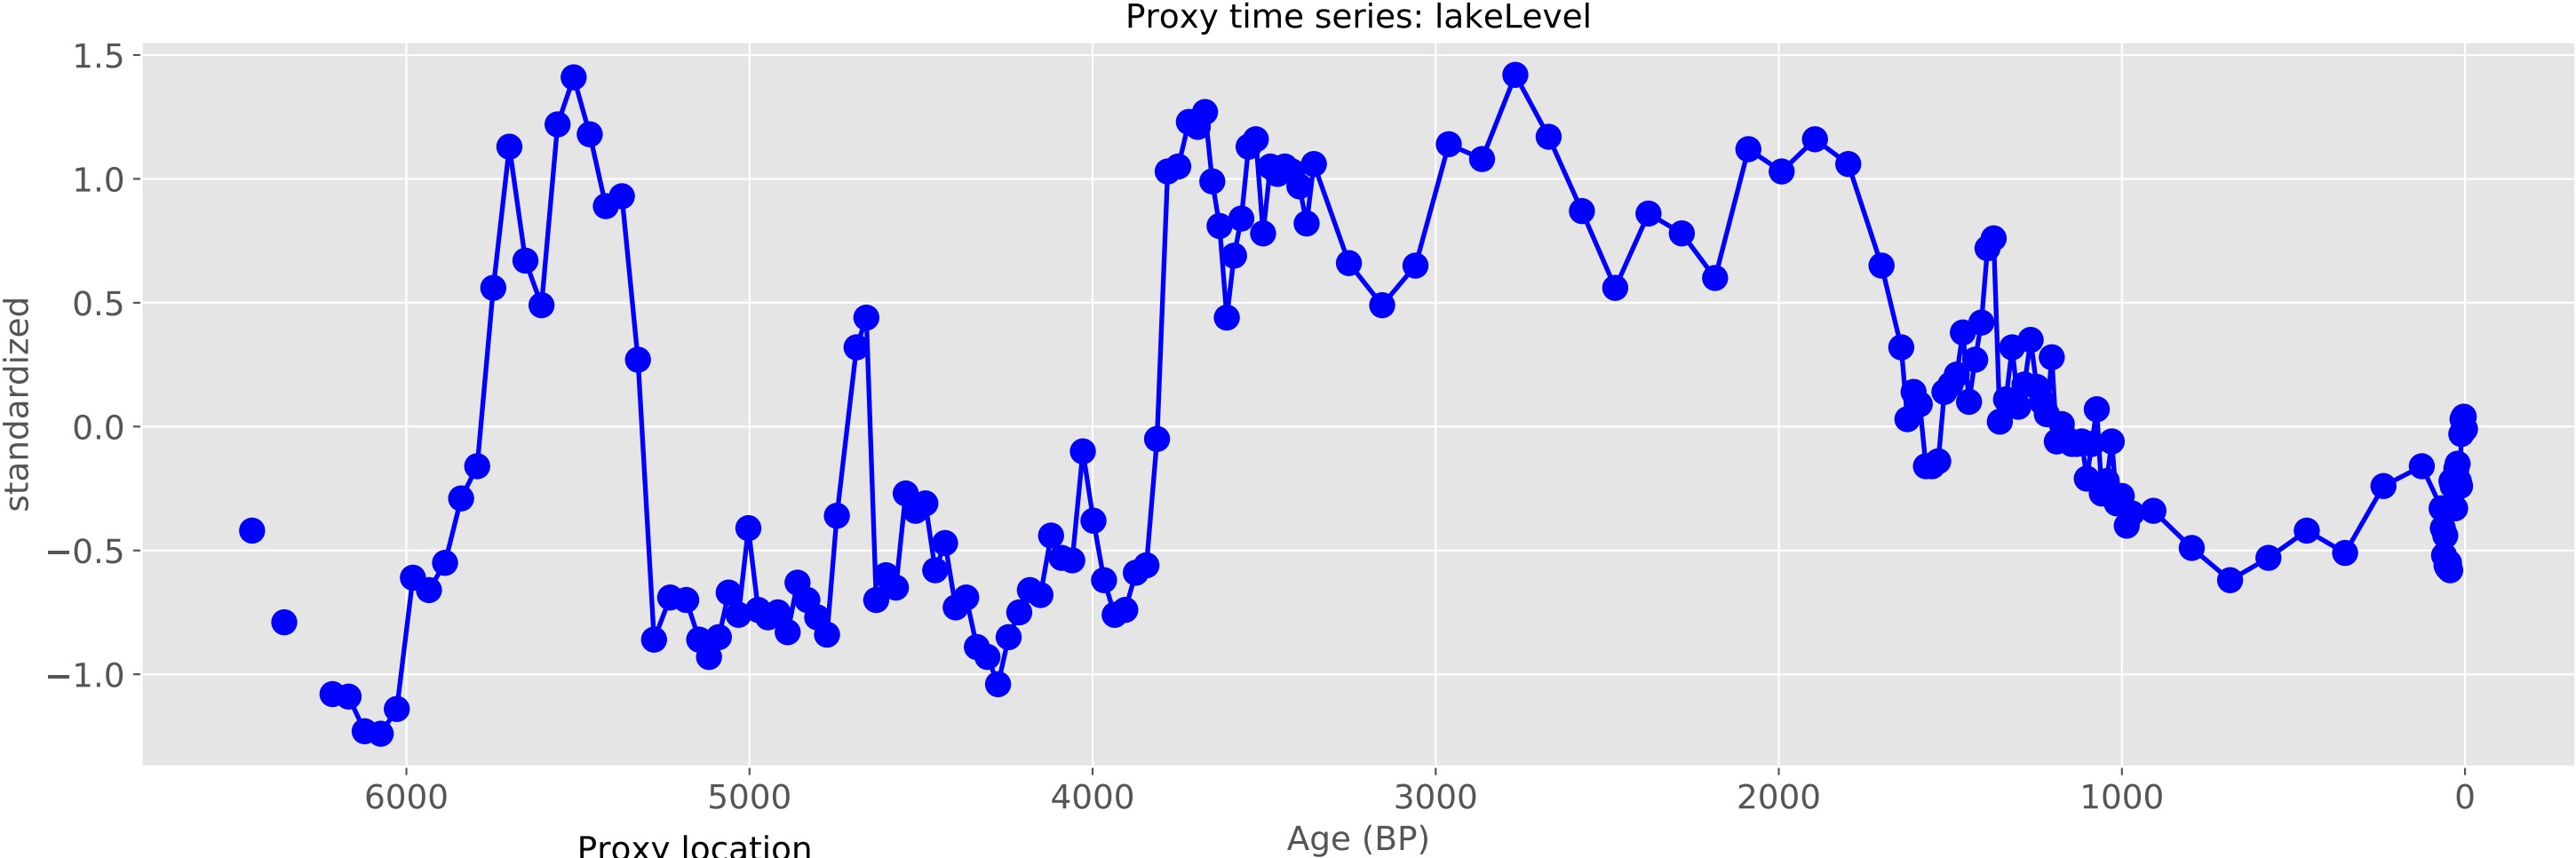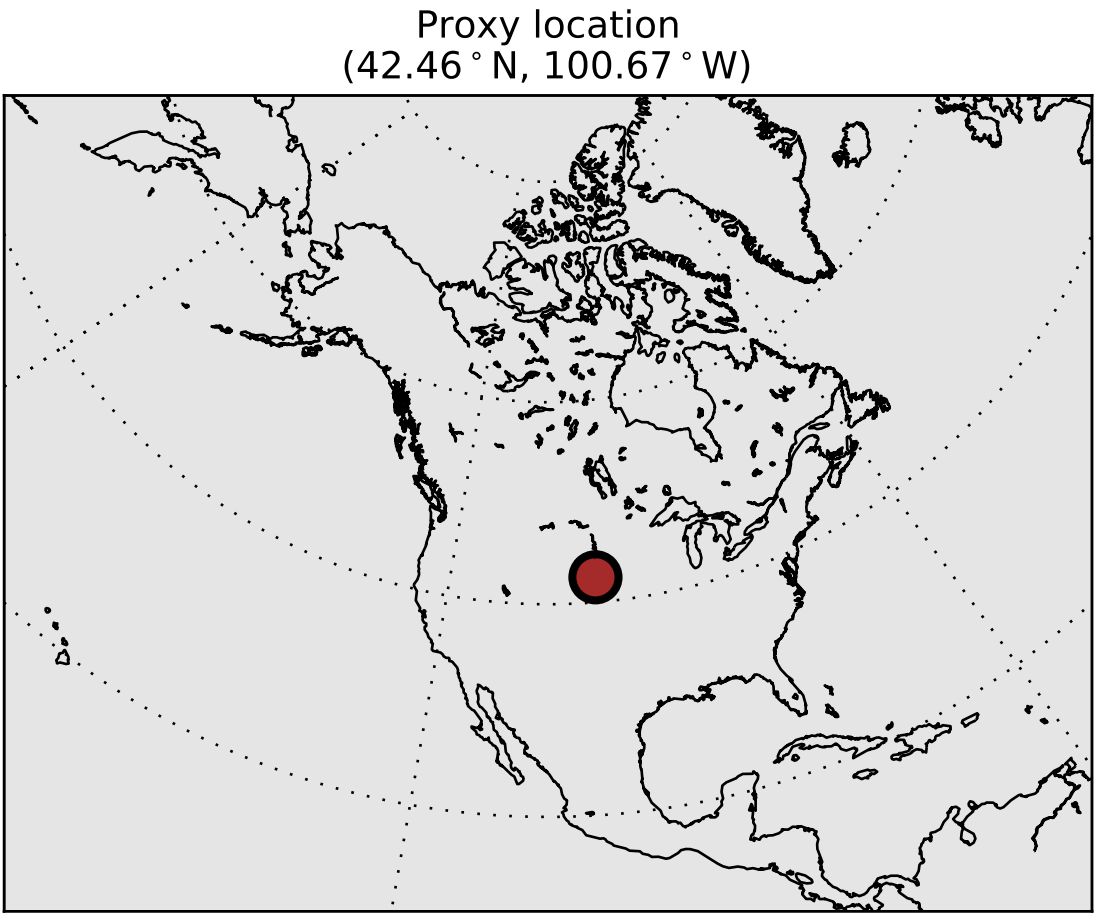

|                    |                                                       |
|--------------------|-------------------------------------------------------|
| Dataset name:      | BeaverLake.Schmieder.2011                             |
| Archive type:      | LakeSediment                                          |
| Proxy type:        | diatom                                                |
| Variable name:     | lakeLevel                                             |
| Latitude ( ° N):   | 42.46                                                 |
| Longitude ( ° E):  | -100.67                                               |
| Elevation (m):     | 905.0                                                 |
| Interp. variable:  | P-E                                                   |
| Interp. detail:    | lakeLevel@surface                                     |
| Interp. season:    | annual                                                |
| Interp. direction: | positive                                              |
| Pub. 1 title:      | A regional-scale climate reconstruction of the las... |
| Pub. 1 authors:    | Schmieder, J.;Fritz, S.C.;Swinehart, J.B.;Shinnema... |
| Pub. 1 year:       | 2011                                                  |
| Pub. 1 DOI:        | 10.1016/j.quascirev.2011.04.011                       |
| Original data URL: | www.ncdc.noaa.gov/paleo/study/23075                   |

Proxy data and metadata

LakeSediment | diatom | SwanLake.Schmieder.2011 | LPD03892251

Proxy time series: lakeLevel

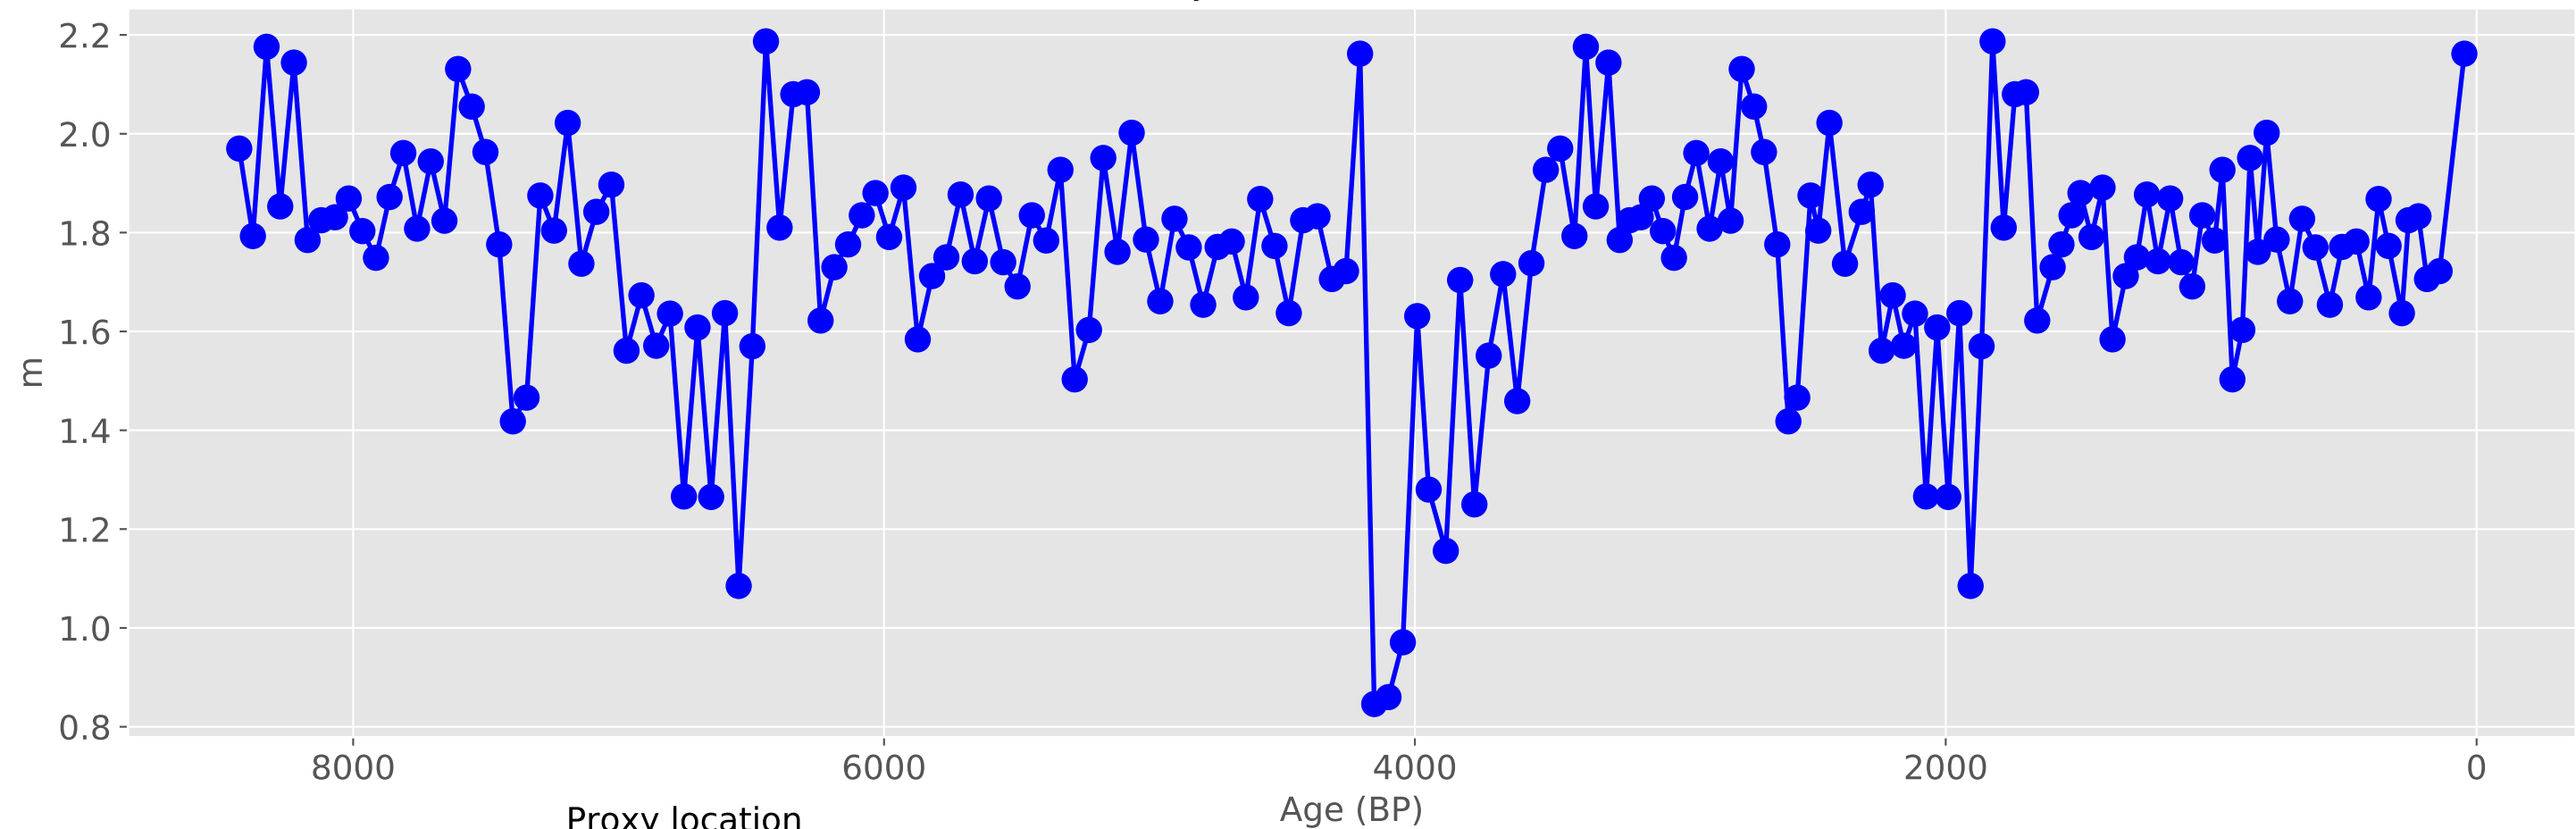

Proxy location  
(42.16 ° N, 99.03 ° W)

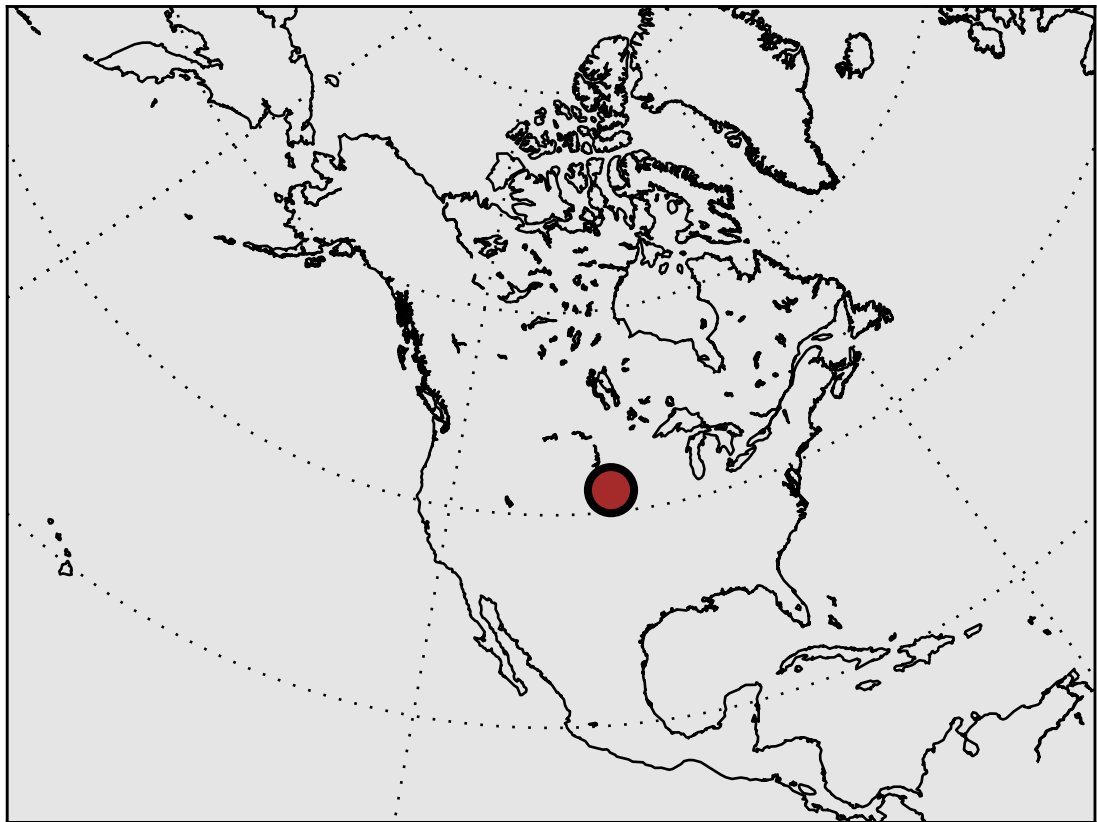

|                    |                                 |
|--------------------|---------------------------------|
| Dataset name:      | SwanLake.Schmieder.2011         |
| Archive type:      | LakeSediment                    |
| Proxy type:        | diatom                          |
| Variable name:     | lakeLevel                       |
| Latitude ( ° N):   | 42.16                           |
| Longitude ( ° E):  | -99.03                          |
| Elevation (m):     | 702.0                           |
| Interp. variable:  | P-E                             |
| Interp. detail:    | lakeLevel@surface               |
| Interp. season:    | annual                          |
| Interp. direction: | negative                        |
| Pub. 1 title:      |                                 |
| Pub. 1 authors:    |                                 |
| Pub. 1 year:       |                                 |
| Pub. 1 DOI:        | 10.1016/j.quascirev.2011.04.011 |
| Original data URL: | wNA                             |

Proxy data and metadata

LakeSediment | diatom | KirmanLake.MacDonald.2016 | LPD41437034

Proxy time series: lakeLevel

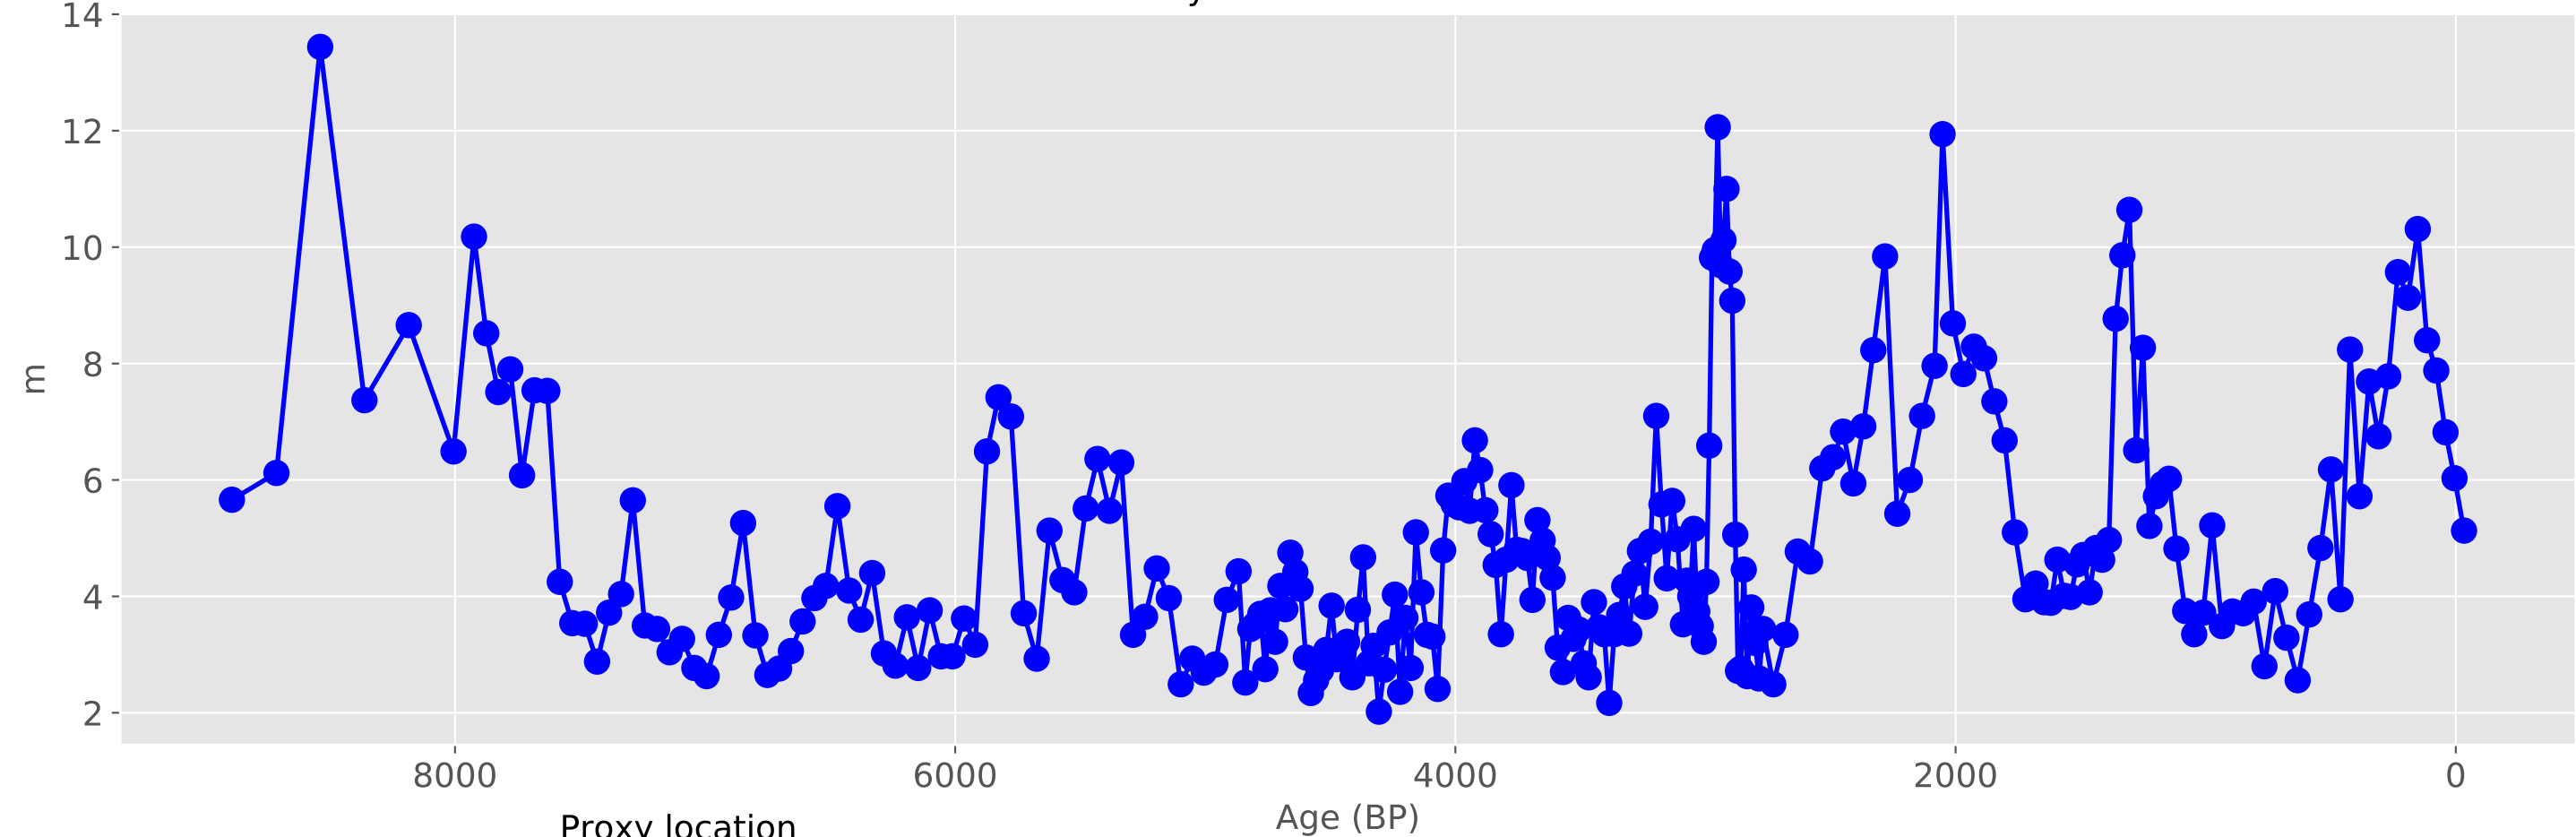

Proxy location  
(38.34 ° N, 119.50 ° W)

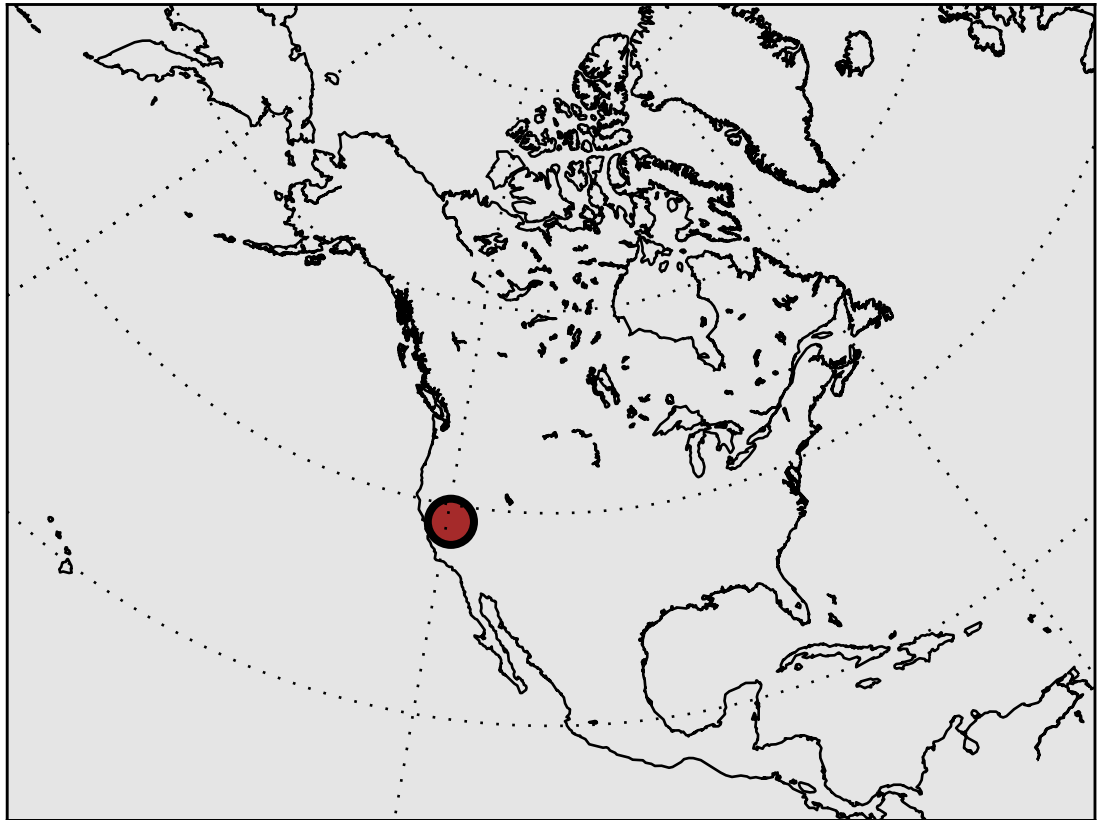

|                    |                                                                                                                     |
|--------------------|---------------------------------------------------------------------------------------------------------------------|
| Dataset name:      | KirmanLake.MacDonald.2016                                                                                           |
| Archive type:      | LakeSediment                                                                                                        |
| Proxy type:        | diatom                                                                                                              |
| Variable name:     | lakeLevel                                                                                                           |
| Latitude ( ° N):   | 38.34                                                                                                               |
| Longitude ( ° E):  | -119.4997                                                                                                           |
| Elevation (m):     | 2174.0                                                                                                              |
| Interp. variable:  | P-E                                                                                                                 |
| Interp. detail:    | lakeLevel@surface                                                                                                   |
| Interp. season:    | annual                                                                                                              |
| Interp. direction: | positive                                                                                                            |
| Pub. 1 title:      | Prolonged California aridity linked to climate war...                                                               |
| Pub. 1 authors:    | MacDonald, Glen M.;Moser, Katrina A.;Bloom, Amy M....                                                               |
| Pub. 1 year:       | 2016                                                                                                                |
| Pub. 1 DOI:        | 10.1038/srep33325                                                                                                   |
| Original data URL: | <a href="https://dataverse.harvard.edu/dataverse/UCLAGMacDonald">dataverse.harvard.edu/dataverse/UCLAGMacDonald</a> |

Proxy data and metadata

LakeSediment | diatom | KirmanLake.MacDonald.2016 | LPD912708fe

Proxy time series: salinity

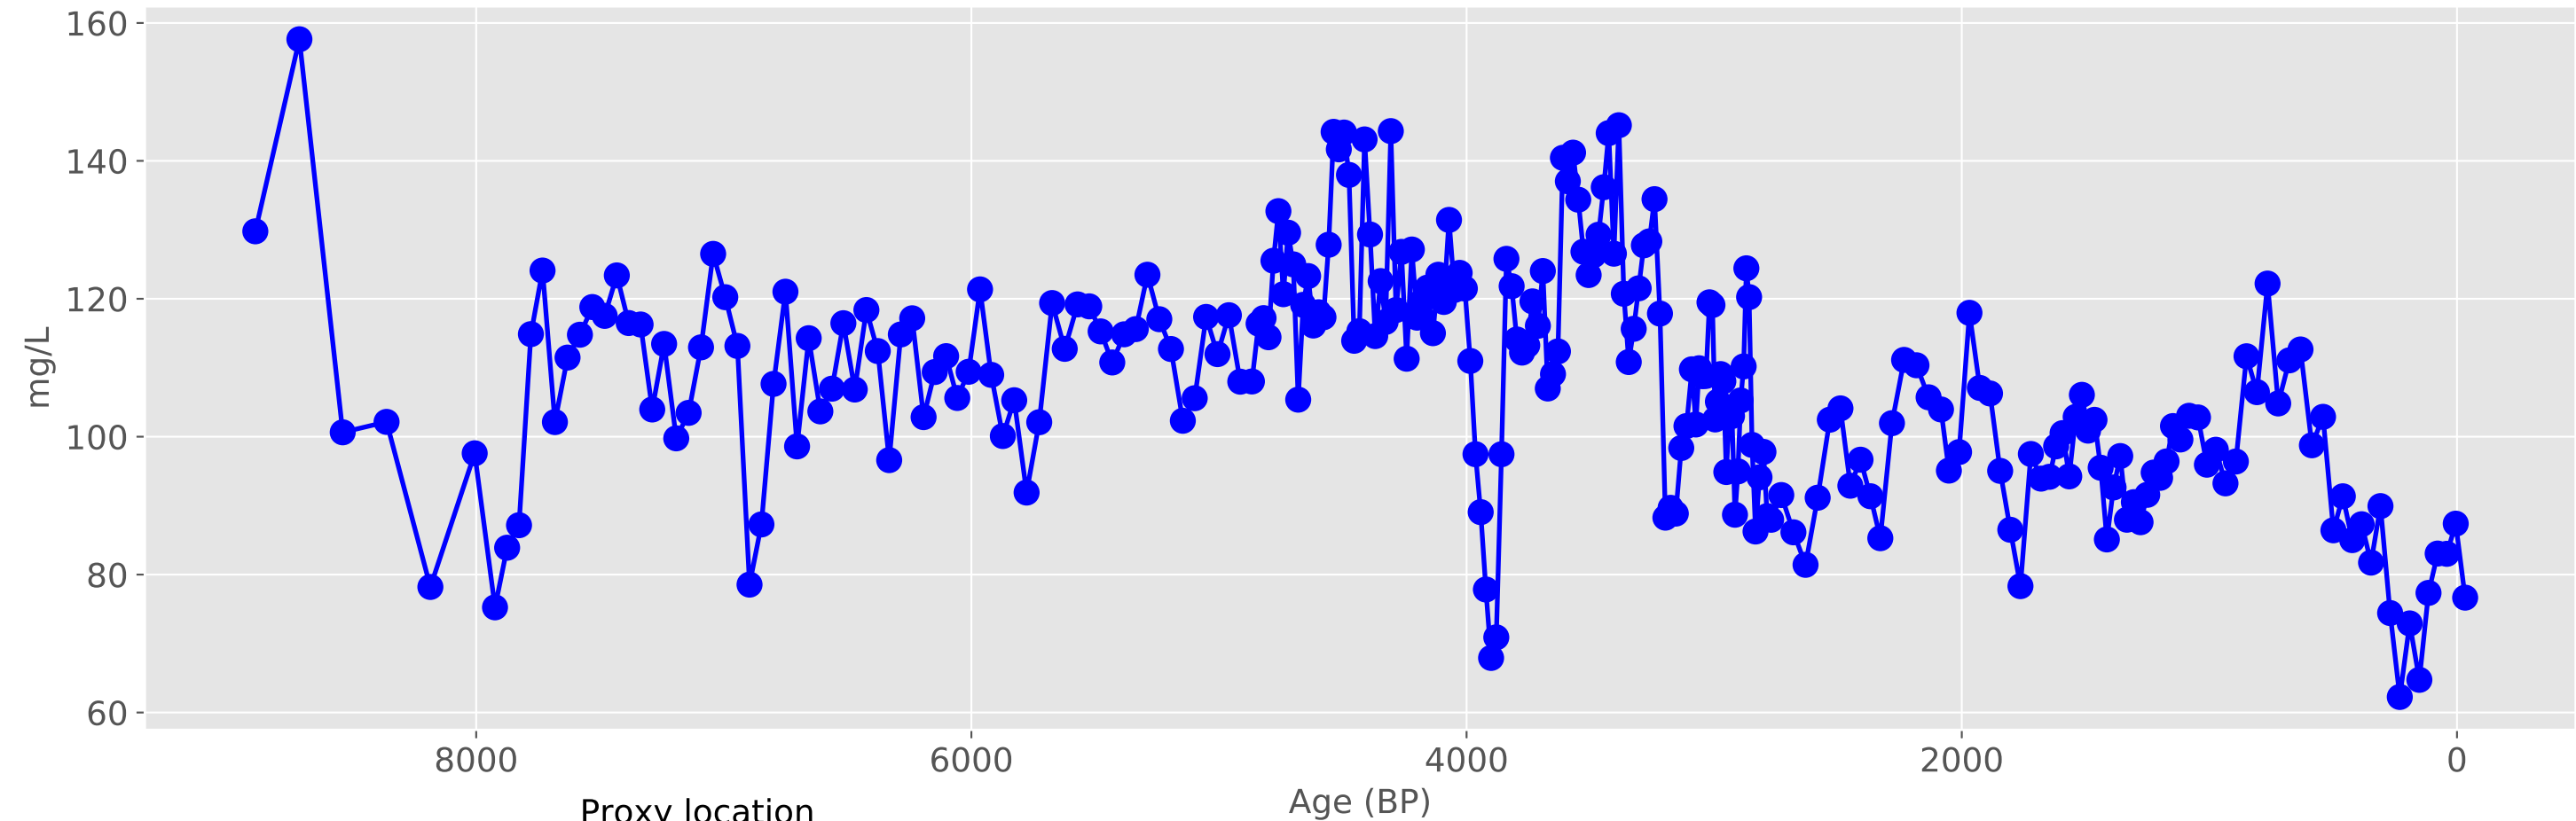

Proxy location  
(38.34 ° N, 119.50 ° W)

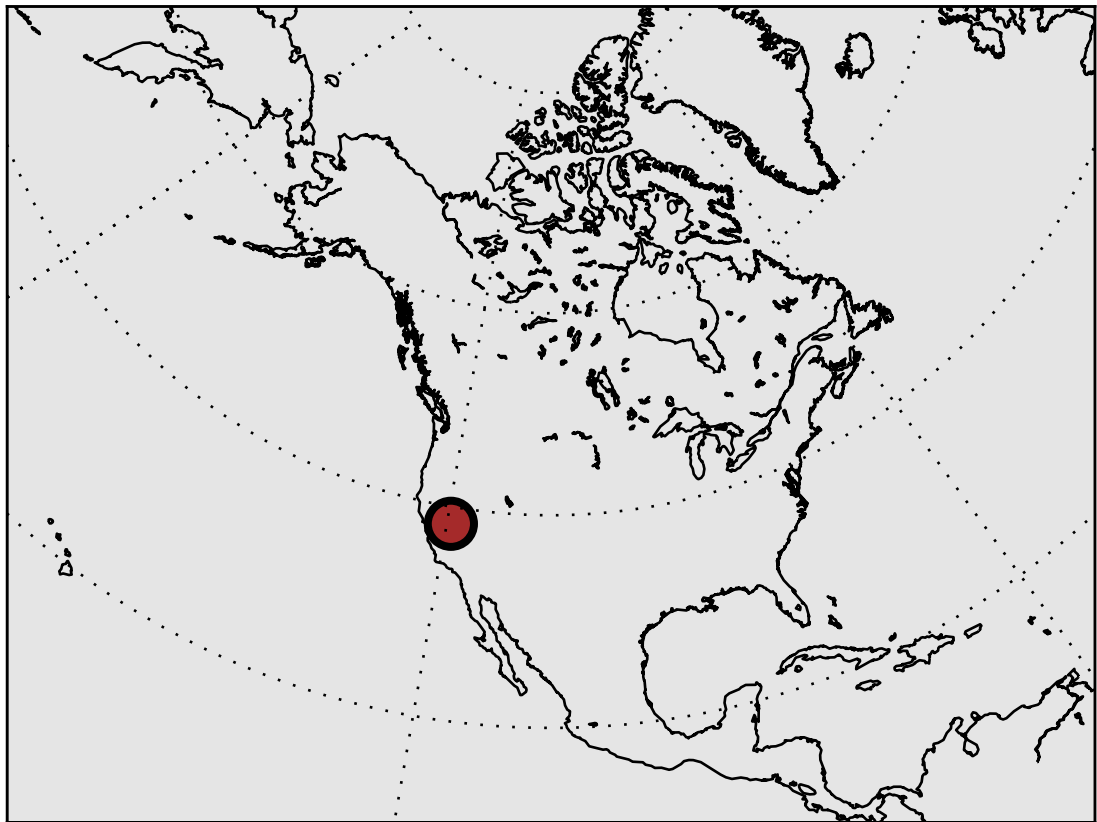

|                    |                                                                                                                     |
|--------------------|---------------------------------------------------------------------------------------------------------------------|
| Dataset name:      | KirmanLake.MacDonald.2016                                                                                           |
| Archive type:      | LakeSediment                                                                                                        |
| Proxy type:        | diatom                                                                                                              |
| Variable name:     | salinity                                                                                                            |
| Latitude ( ° N):   | 38.34                                                                                                               |
| Longitude ( ° E):  | -119.4997                                                                                                           |
| Elevation (m):     | 2174.0                                                                                                              |
| Interp. variable:  | P-E                                                                                                                 |
| Interp. detail:    | lakeSalinity                                                                                                        |
| Interp. season:    | annual                                                                                                              |
| Interp. direction: | negative                                                                                                            |
| Pub. 1 title:      | Prolonged California aridity linked to climate war...                                                               |
| Pub. 1 authors:    | MacDonald, Glen M.;Moser, Katrina A.;Bloom, Amy M....                                                               |
| Pub. 1 year:       | 2016                                                                                                                |
| Pub. 1 DOI:        | 10.1038/srep33325                                                                                                   |
| Original data URL: | <a href="https://dataverse.harvard.edu/dataverse/UCLAGMacDonald">dataverse.harvard.edu/dataverse/UCLAGMacDonald</a> |



Proxy data and metadata  
LakeSediment | MAR | Wolverine.Mann.2002 | GH66374774

Proxy time series: MAR

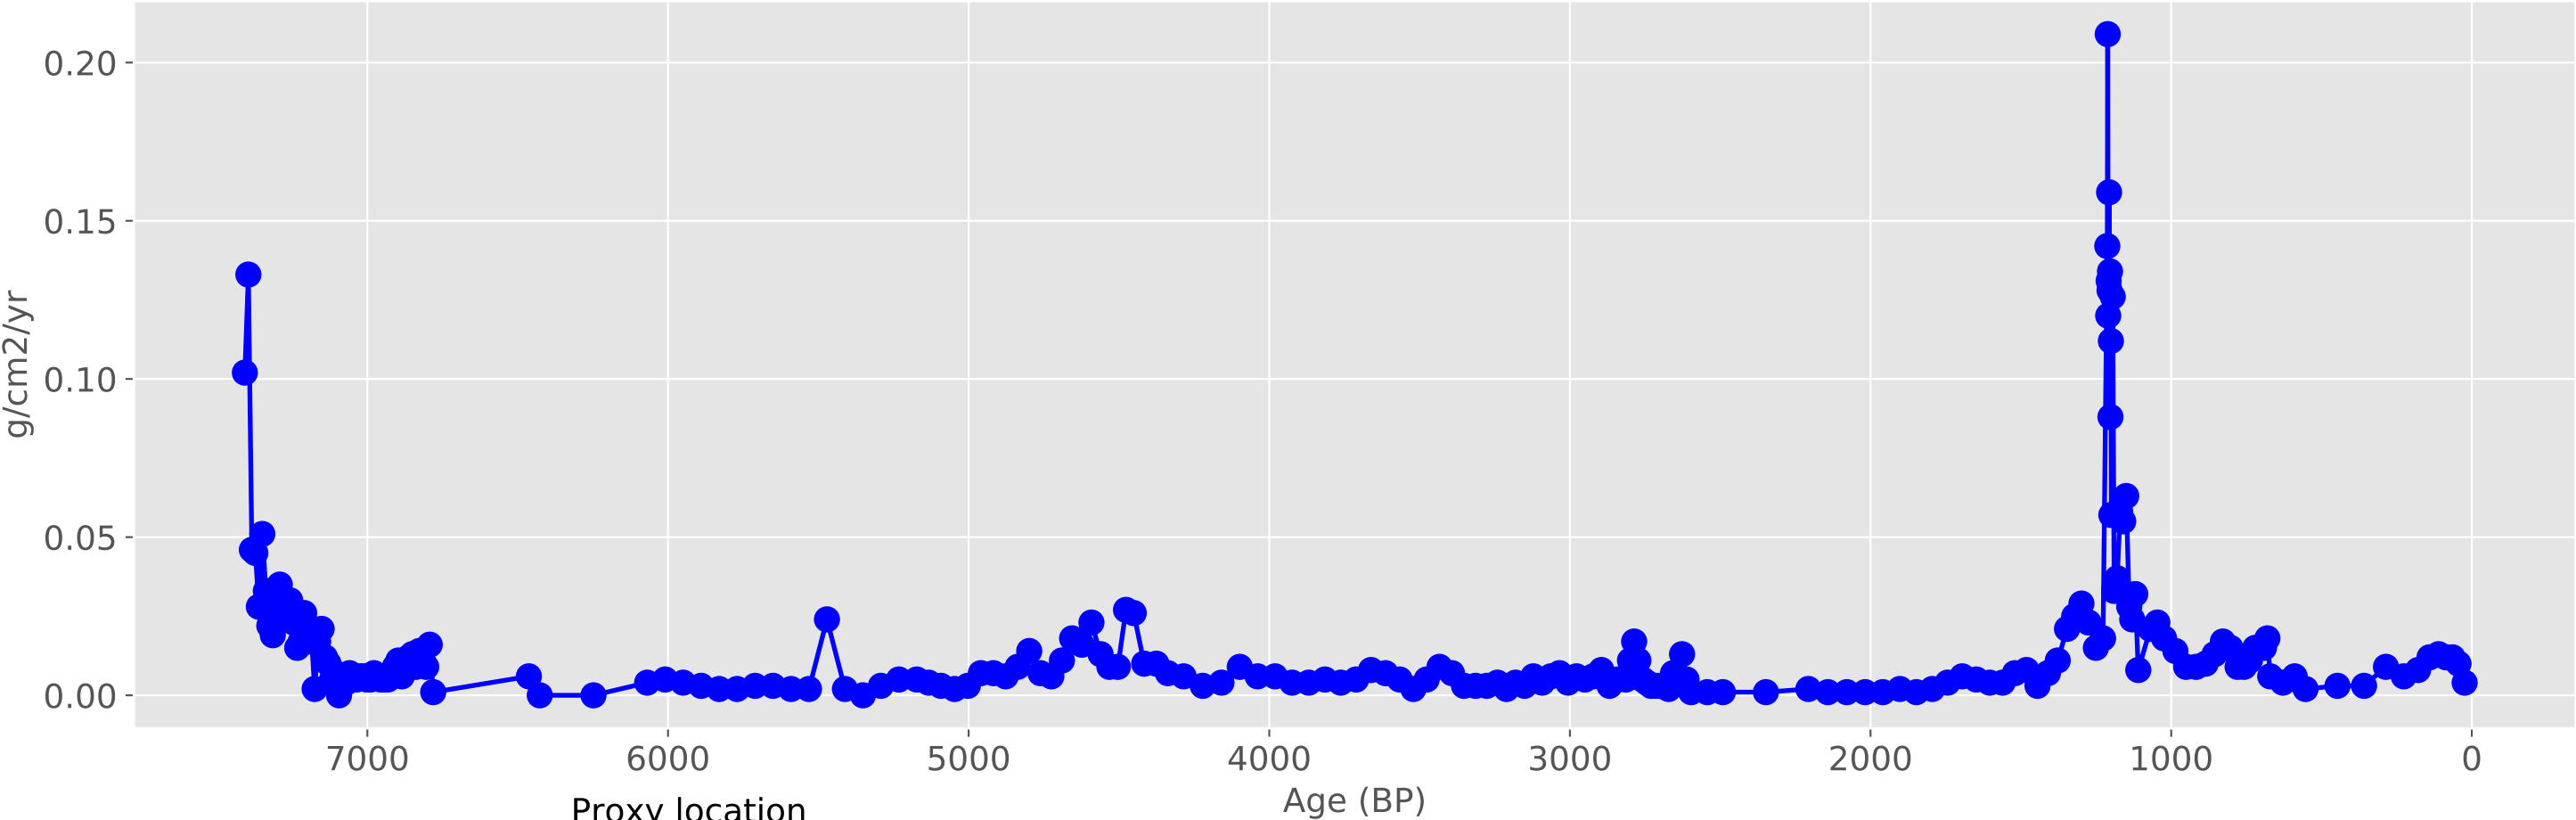

Proxy location  
(67.10 ° N, 158.91 ° W)

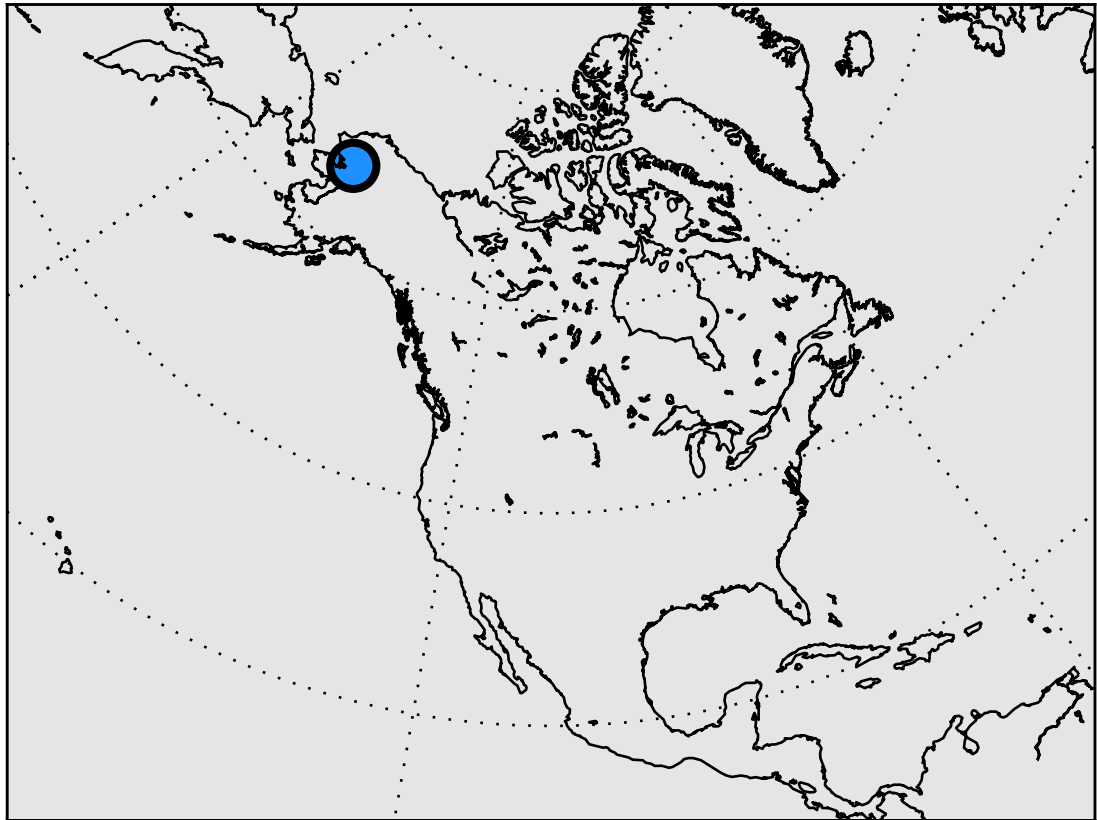

|                    |                                                       |
|--------------------|-------------------------------------------------------|
| Dataset name:      | Wolverine.Mann.2002                                   |
| Archive type:      | LakeSediment                                          |
| Proxy type:        | MAR                                                   |
| Variable name:     | MAR                                                   |
| Latitude ( ° N):   | 67.098                                                |
| Longitude ( ° E):  | -158.914                                              |
| Elevation (m):     | 52.0                                                  |
| Interp. variable:  | P-E                                                   |
| Interp. detail:    | @surface                                              |
| Interp. season:    | annual                                                |
| Interp. direction: | negative                                              |
| Pub. 1 title:      | Holocene history of the Great Kobuk Sand Dunes, No... |
| Pub. 1 authors:    | Mann, D.H;Heiser, P.A;Finney, B.P                     |
| Pub. 1 year:       | 2002                                                  |
| Pub. 1 DOI:        | 10.1016/S0277-3791(01)00120-2                         |
| Original data URL: | www.ncdc.noaa.gov/paleo/study/23070                   |

Proxy data and metadata  
LakeSediment | Mg/Ca | Farewell.Hu.1998 | PYTUWT2GQ7F

Proxy time series: temperature

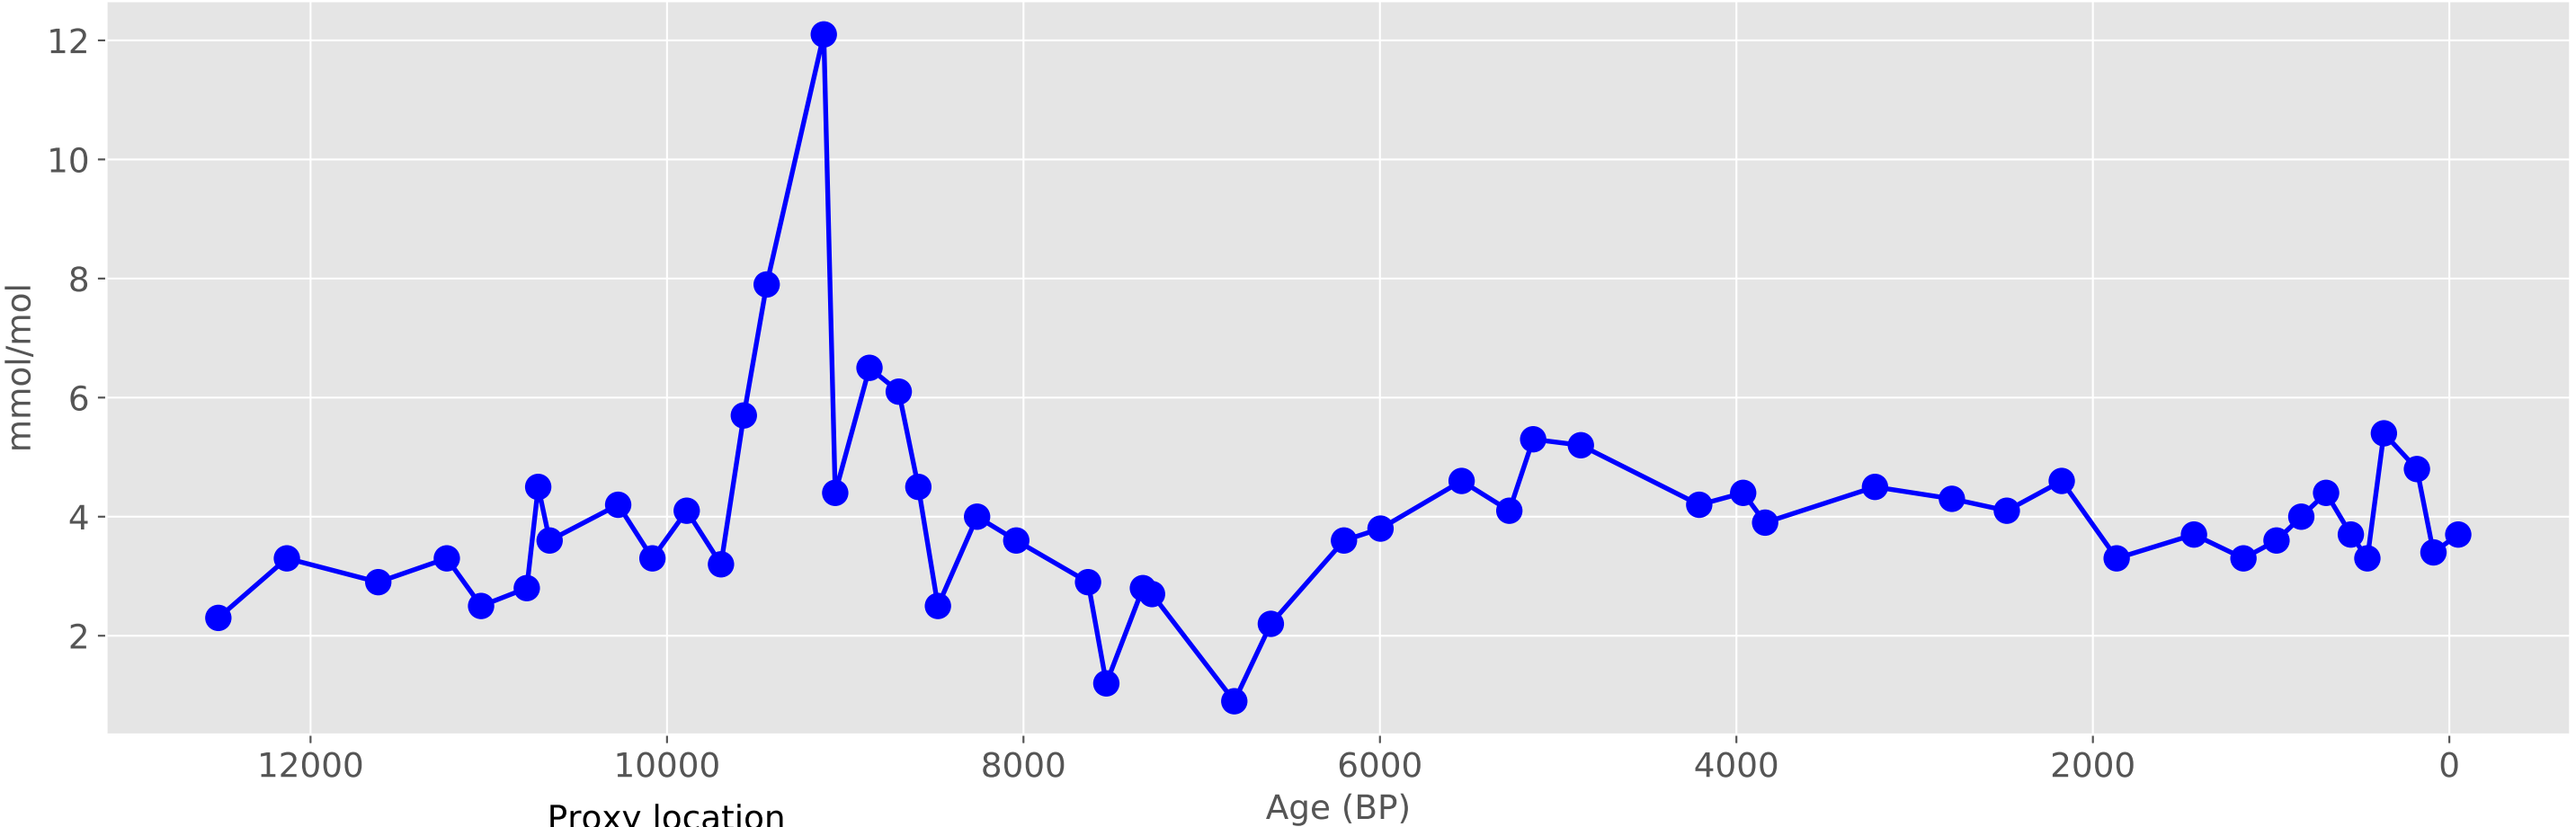

Proxy location  
(62.55 ° N, 153.63 ° W)

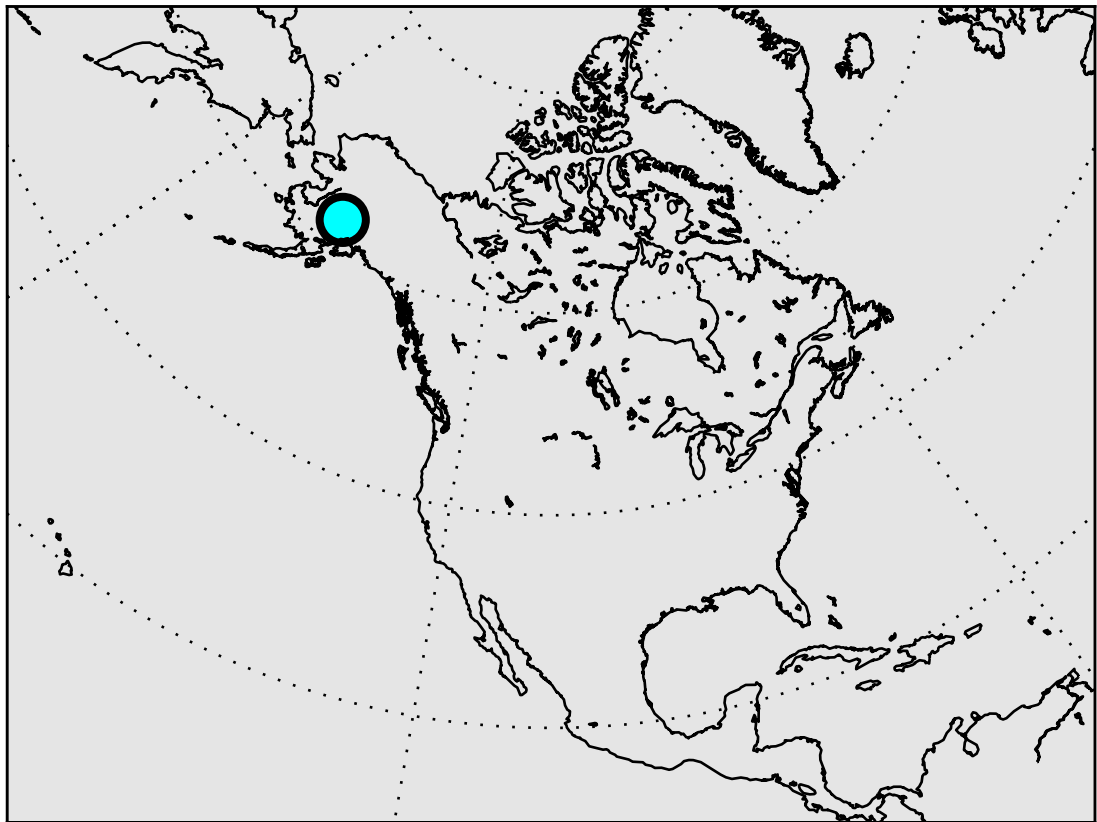

|                    |                                                       |
|--------------------|-------------------------------------------------------|
| Dataset name:      | Farewell.Hu.1998                                      |
| Archive type:      | LakeSediment                                          |
| Proxy type:        | Mg/Ca                                                 |
| Variable name:     | temperature                                           |
| Latitude ( ° N):   | 62.55                                                 |
| Longitude ( ° E):  | -153.63                                               |
| Elevation (m):     | 230.0                                                 |
| Interp. variable:  | T                                                     |
| Interp. detail:    | lake@surface                                          |
| Interp. season:    | summerOnly                                            |
| Interp. direction: | positive                                              |
| Pub. 1 title:      | Ostracode geochemical record of Holocene climatic ... |
| Pub. 1 authors:    | Hu, Feng Sheng; Ito, Emi; Brubaker, Linda B.; Ande... |
| Pub. 1 year:       | 1998                                                  |
| Pub. 1 DOI:        | 10.1006/qres.1997.1936                                |
| Original data URL: | www.ncdc.noaa.gov/paleo/study/15444                   |

Proxy data and metadata

LakeSediment | MS | Harding.Finkenbinder.2014 | WEBccbba2853

Proxy time series: MS

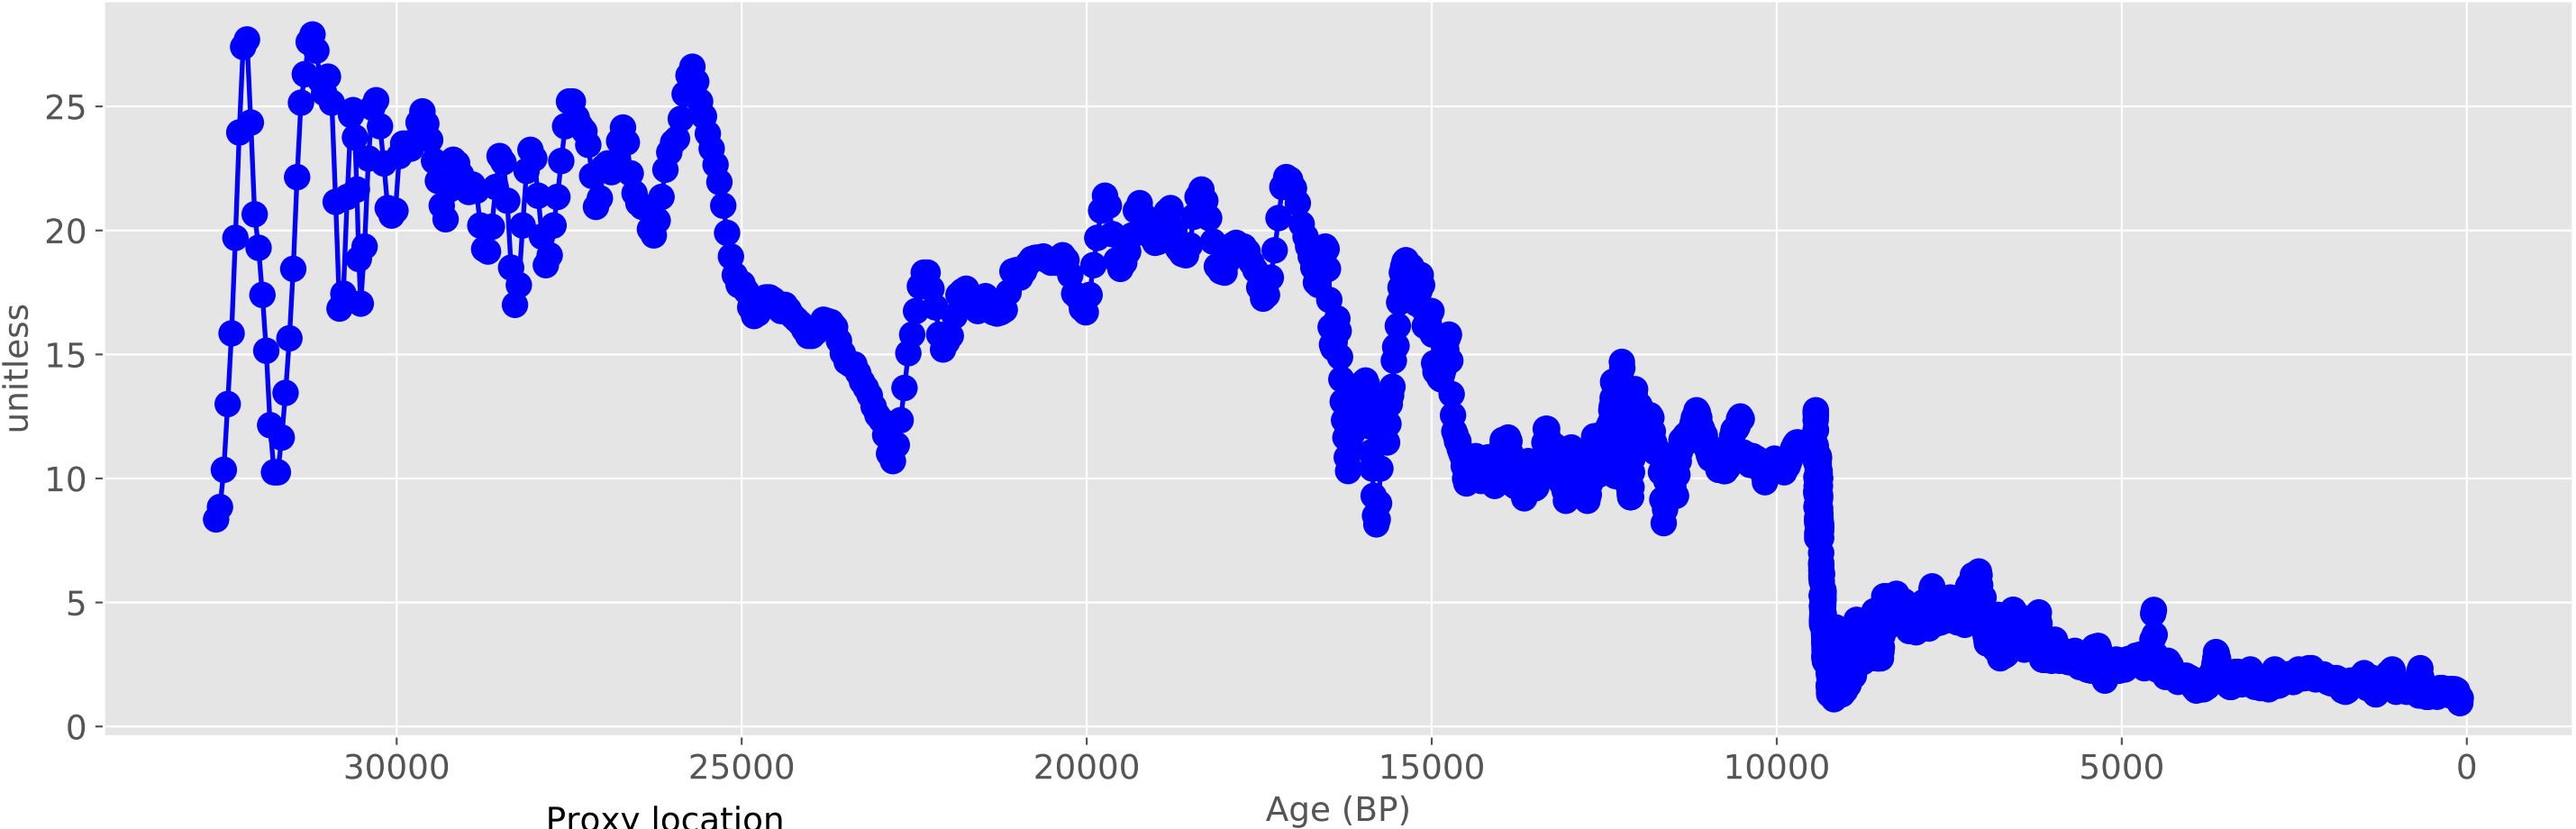

Proxy location  
(64.42 ° N, 146.85 ° W)

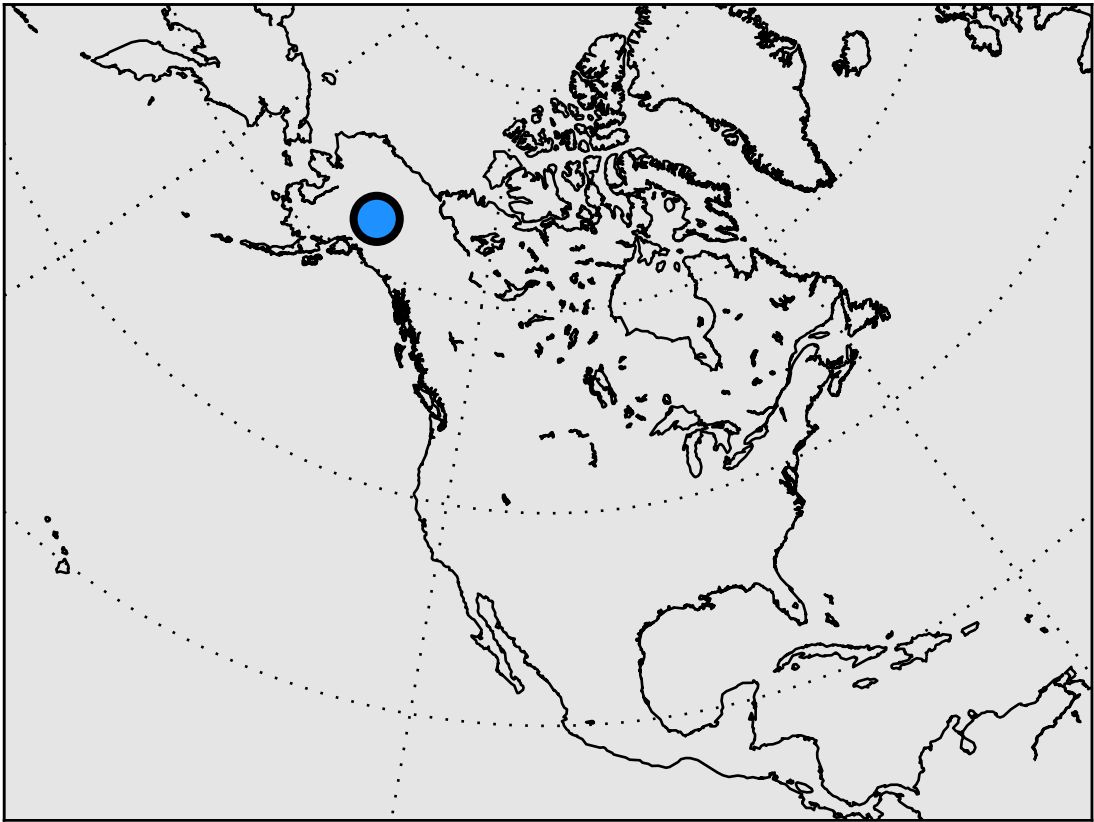

|                    |                                                                                              |
|--------------------|----------------------------------------------------------------------------------------------|
| Dataset name:      | Harding.Finkenbinder.2014                                                                    |
| Archive type:      | LakeSediment                                                                                 |
| Proxy type:        | MS                                                                                           |
| Variable name:     | MS                                                                                           |
| Latitude ( ° N):   | 64.42                                                                                        |
| Longitude ( ° E):  | -146.85                                                                                      |
| Elevation (m):     | 217.0                                                                                        |
| Interp. variable:  | P-E                                                                                          |
| Interp. detail:    | lakeLevel@surface                                                                            |
| Interp. season:    | annual                                                                                       |
| Interp. direction: | negative                                                                                     |
| Pub. 1 title:      | A 31,000 year record of paleoenvironmental and lak...                                        |
| Pub. 1 authors:    | Finkenbinder, Matthew S.                                                                     |
| Pub. 1 year:       | 2014                                                                                         |
| Pub. 1 DOI:        | 10.1016/j.quascirev.2014.01.005                                                              |
| Original data URL: | <a href="http://www.ncdc.noaa.gov/paleo/study/15655">www.ncdc.noaa.gov/paleo/study/15655</a> |

Proxy data and metadata  
LakeSediment | MS | Minucua.Goman.2018 | WEBb09ddc98

Proxy time series: MS

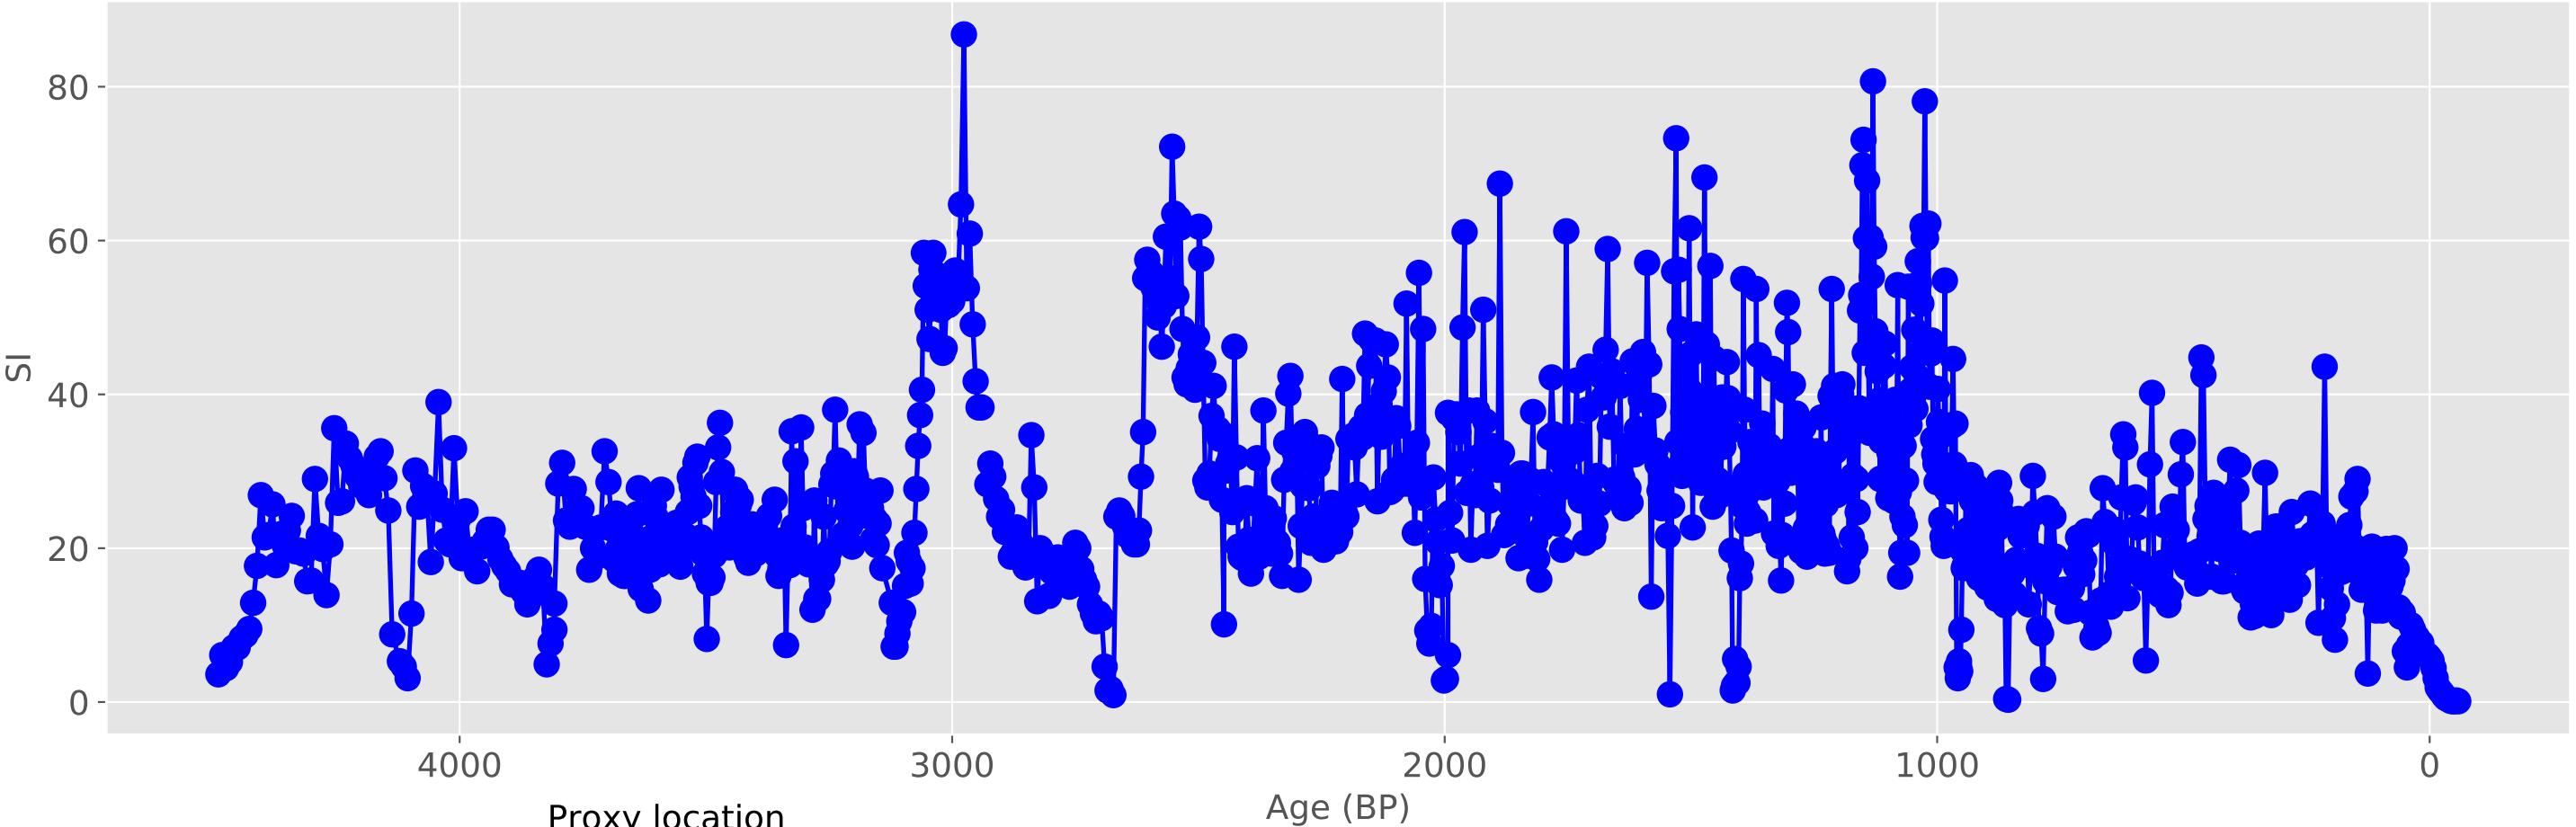

Proxy location  
(17.08 ° N, 97.61 ° W)

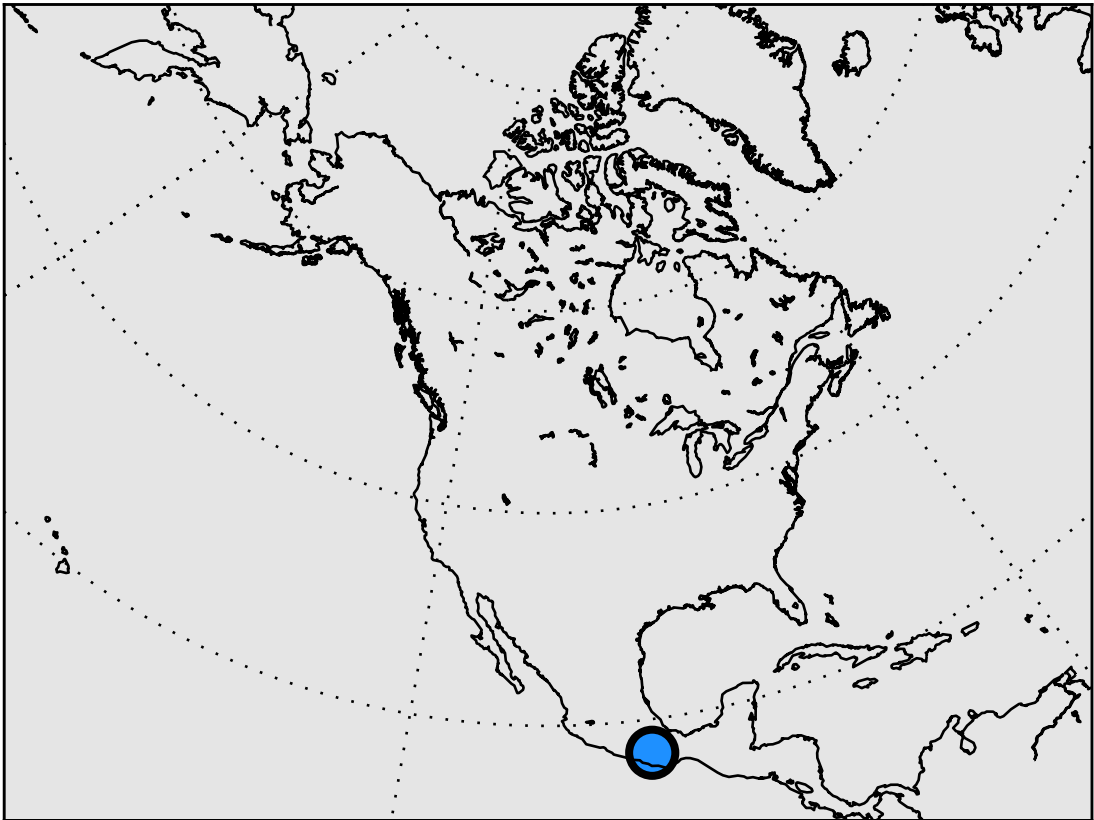

|                    |                                                       |
|--------------------|-------------------------------------------------------|
| Dataset name:      | Minucua.Goman.2018                                    |
| Archive type:      | LakeSediment                                          |
| Proxy type:        | MS                                                    |
| Variable name:     | MS                                                    |
| Latitude ( ° N):   | 17.079                                                |
| Longitude ( ° E):  | -97.609                                               |
| Elevation (m):     | 2510.0                                                |
| Interp. variable:  | P                                                     |
| Interp. detail:    | runoff@surface                                        |
| Interp. season:    | summerOnly                                            |
| Interp. direction: | positive                                              |
| Pub. 1 title:      | Preliminary results from Laguna Minucúa: a potenti... |
| Pub. 1 authors:    | Goman, Michelle;Joyce, Arthur;Lund, Steve;Pearson,... |
| Pub. 1 year:       | 2018                                                  |
| Pub. 1 DOI:        | 10.1016/j.quaint.2017.01.027                          |
| Original data URL: | wNAm                                                  |

Proxy data and metadata

LakeSediment | partical size | Craterlake.Arcusa.2020 | R9KcxotpxMd

Proxy time series: 0.50\_quantile\_dust\_flux

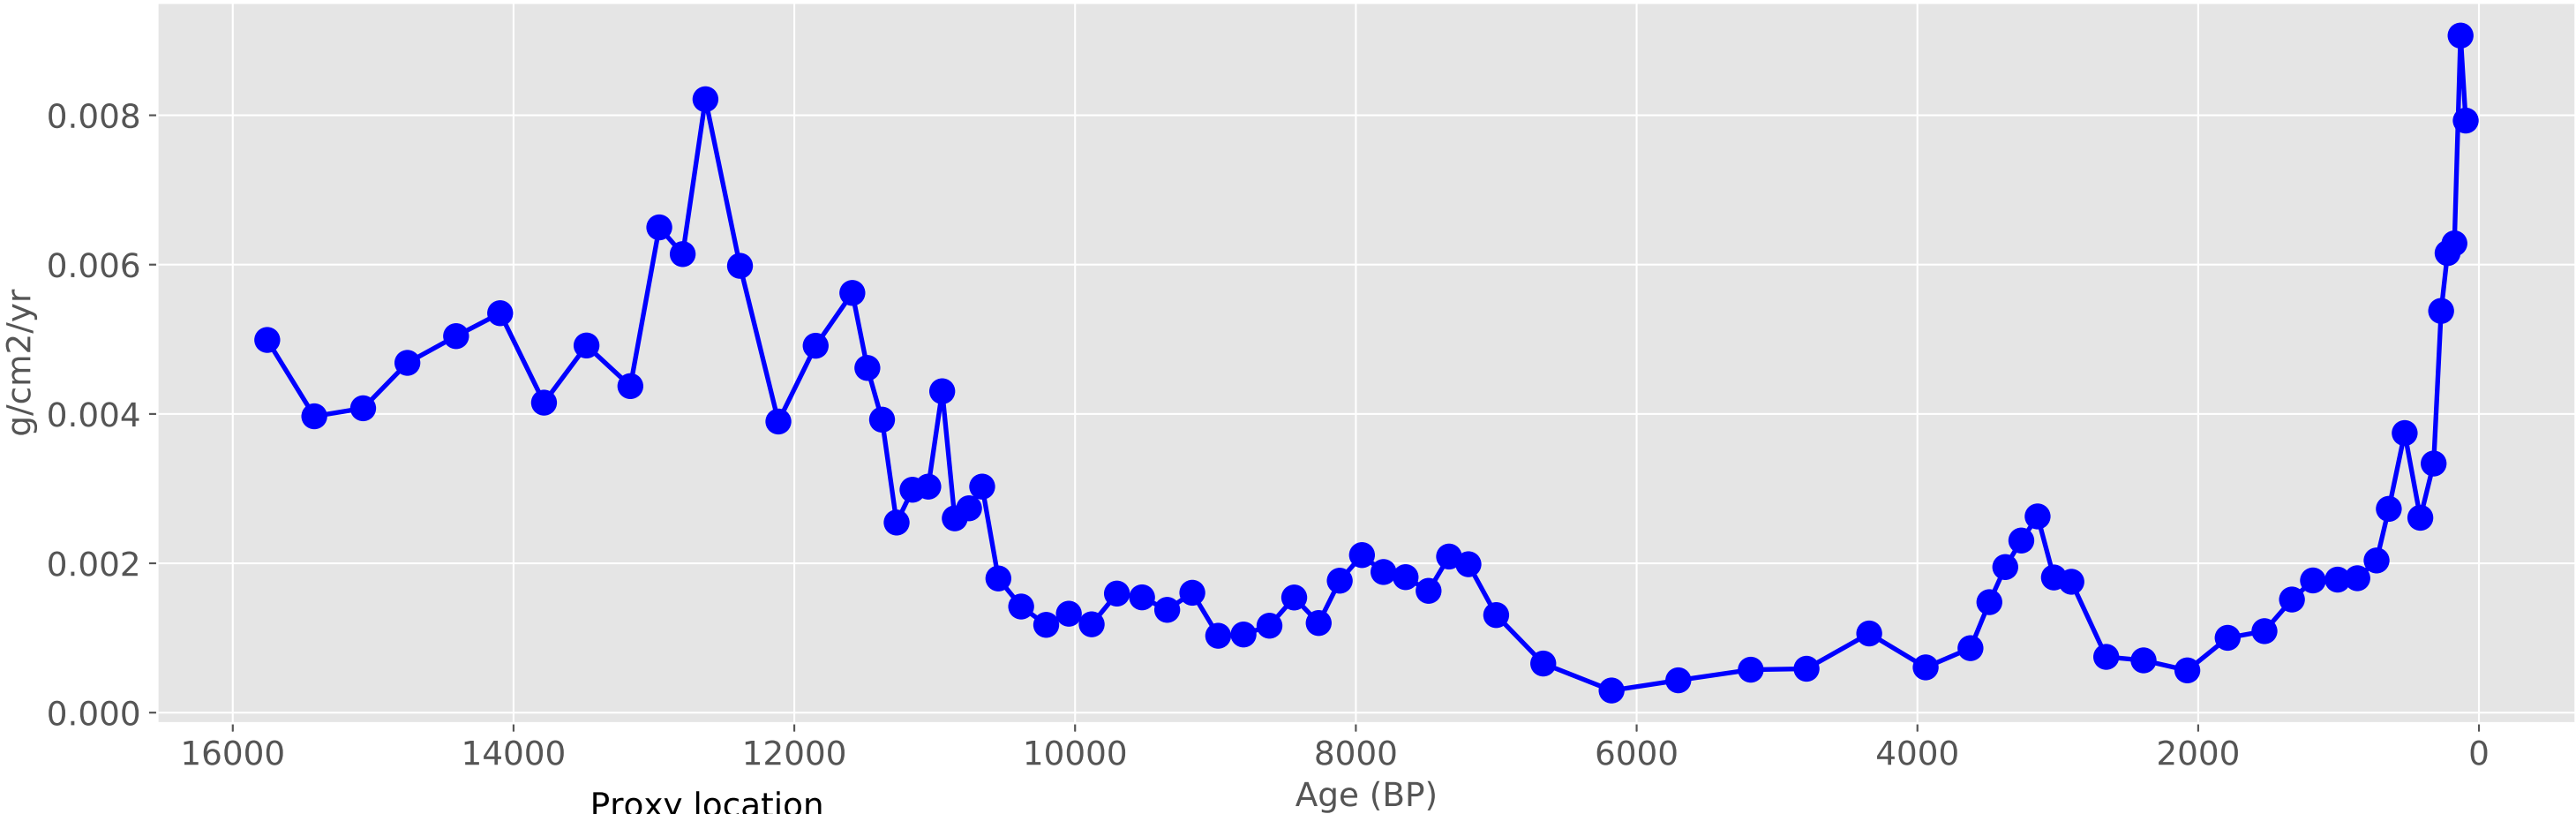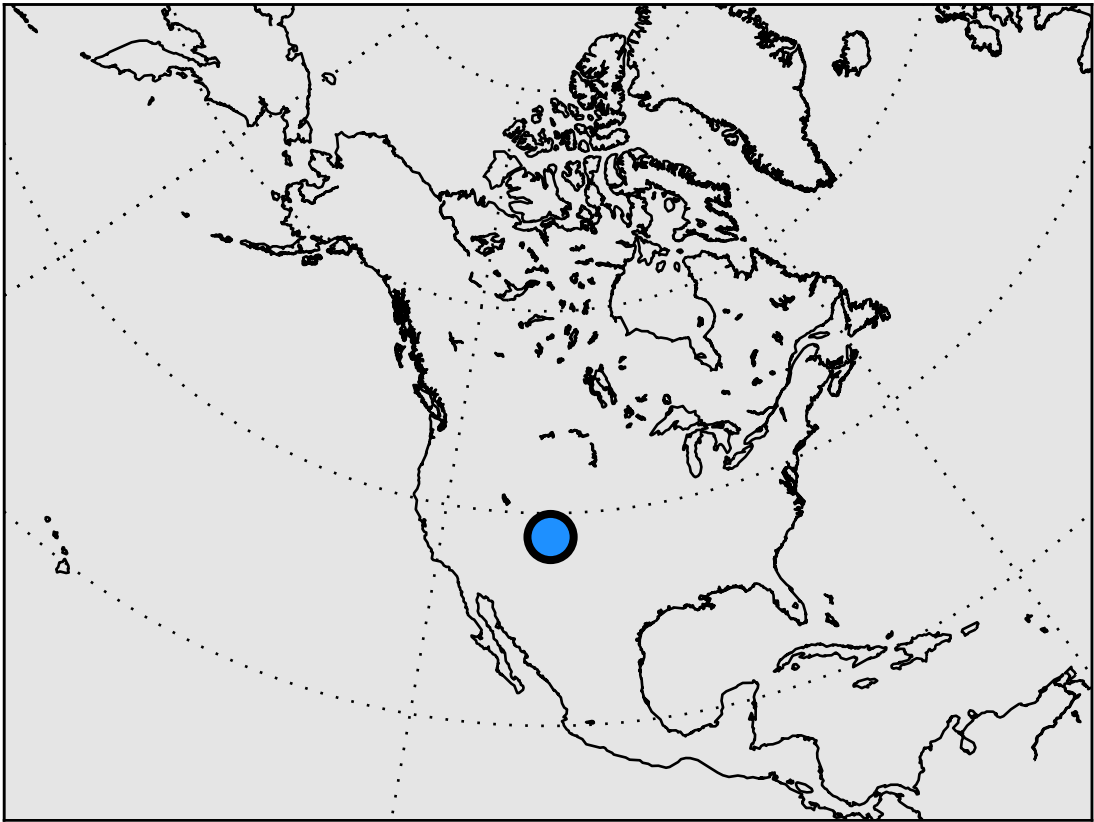

|                    |                                                       |
|--------------------|-------------------------------------------------------|
| Dataset name:      | Craterlake.Arcusa.2020                                |
| Archive type:      | LakeSediment                                          |
| Proxy type:        | partical size                                         |
| Variable name:     | 0.50_quantile_dust_flux                               |
| Latitude ( ° N):   | 37.6743                                               |
| Longitude ( ° E):  | -106.6949                                             |
| Elevation (m):     | 3338.0                                                |
| Interp. variable:  | DUST                                                  |
| Interp. detail:    | amount@surface                                        |
| Interp. season:    | annual                                                |
| Interp. direction: | positive                                              |
| Pub. 1 title:      | Dust-drought interactions over the last 15,000 yea... |
| Pub. 1 authors:    | Arcusa, Stephanie H;McKay, Nicholas P;Routson, Cod... |
| Pub. 1 year:       | 2020                                                  |
| Pub. 1 DOI:        | 10.1177/0959683619875192                              |
| Original data URL: | wNAm                                                  |

Proxy data and metadata  
LakeSediment | partical size | SilverLake.Kirby.2015 | WEB6e4417db

Proxy time series: clay

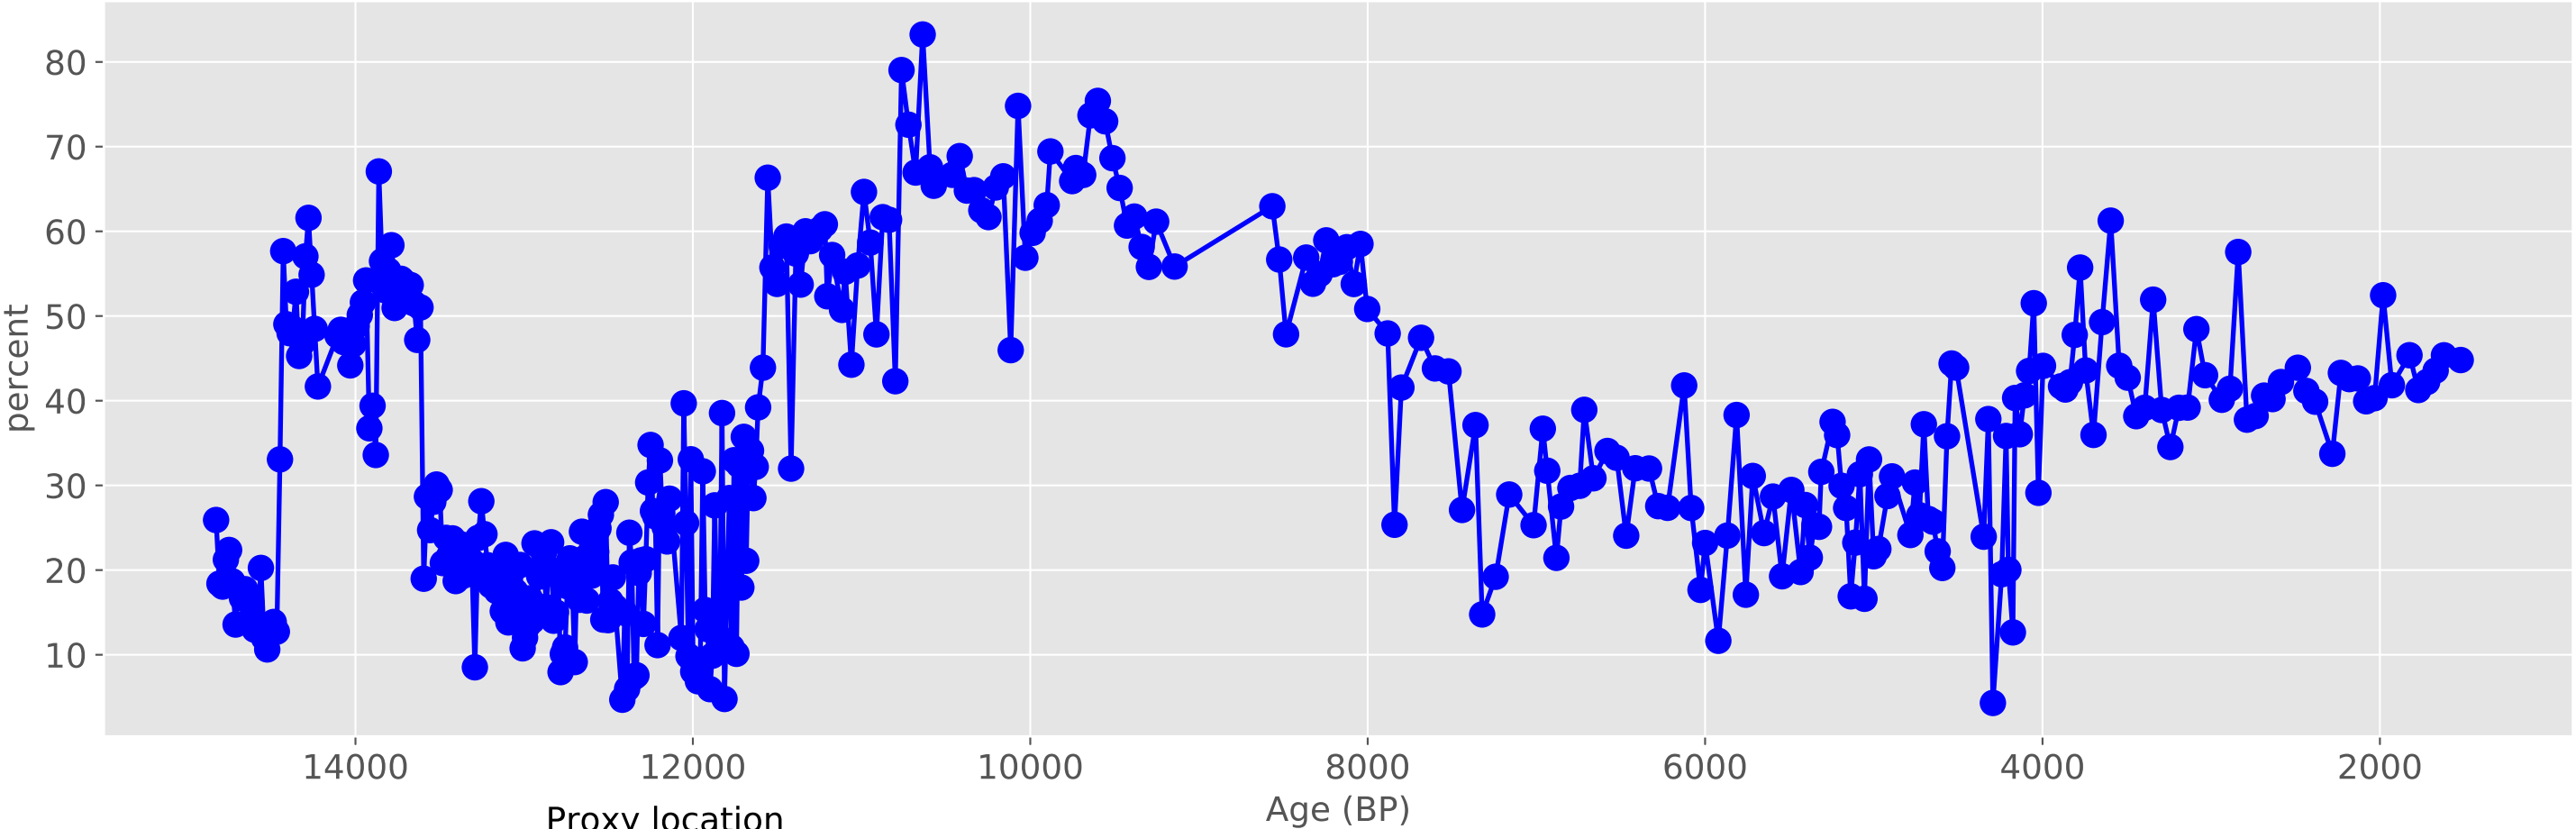

Proxy location  
(35.37 ° N, 116.14 ° W)

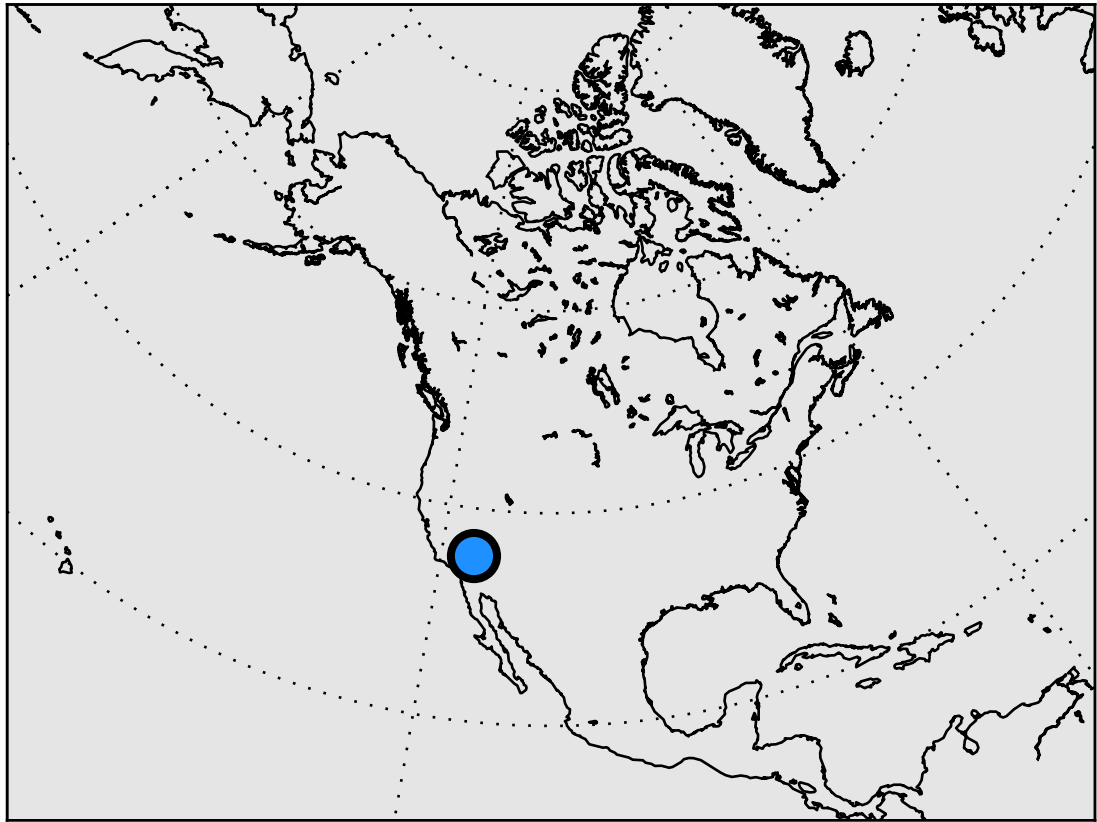

|                    |                                                                                              |
|--------------------|----------------------------------------------------------------------------------------------|
| Dataset name:      | SilverLake.Kirby.2015                                                                        |
| Archive type:      | LakeSediment                                                                                 |
| Proxy type:        | partical size                                                                                |
| Variable name:     | clay                                                                                         |
| Latitude ( ° N):   | 35.3669                                                                                      |
| Longitude ( ° E):  | -116.135                                                                                     |
| Elevation (m):     | 277.0                                                                                        |
| Interp. variable:  | P-E                                                                                          |
| Interp. detail:    | lakeLevel@surface                                                                            |
| Interp. season:    | annual                                                                                       |
| Interp. direction: | positive                                                                                     |
| Pub. 1 title:      | Evidence for insolation and Pacific forcing of lat...                                        |
| Pub. 1 authors:    | Kirby, Matthew E.;Knell, Edward J.;Anderson, Willi...                                        |
| Pub. 1 year:       | 2015                                                                                         |
| Pub. 1 DOI:        | 10.1016/j.yqres.2015.07.003                                                                  |
| Original data URL: | <a href="http://www.ncdc.noaa.gov/paleo/study/20106">www.ncdc.noaa.gov/paleo/study/20106</a> |



Proxy data and metadata  
**LakeSediment | partical size | SilverLake.Kirby.2015 | WEB761967ae**

Proxy time series: sand

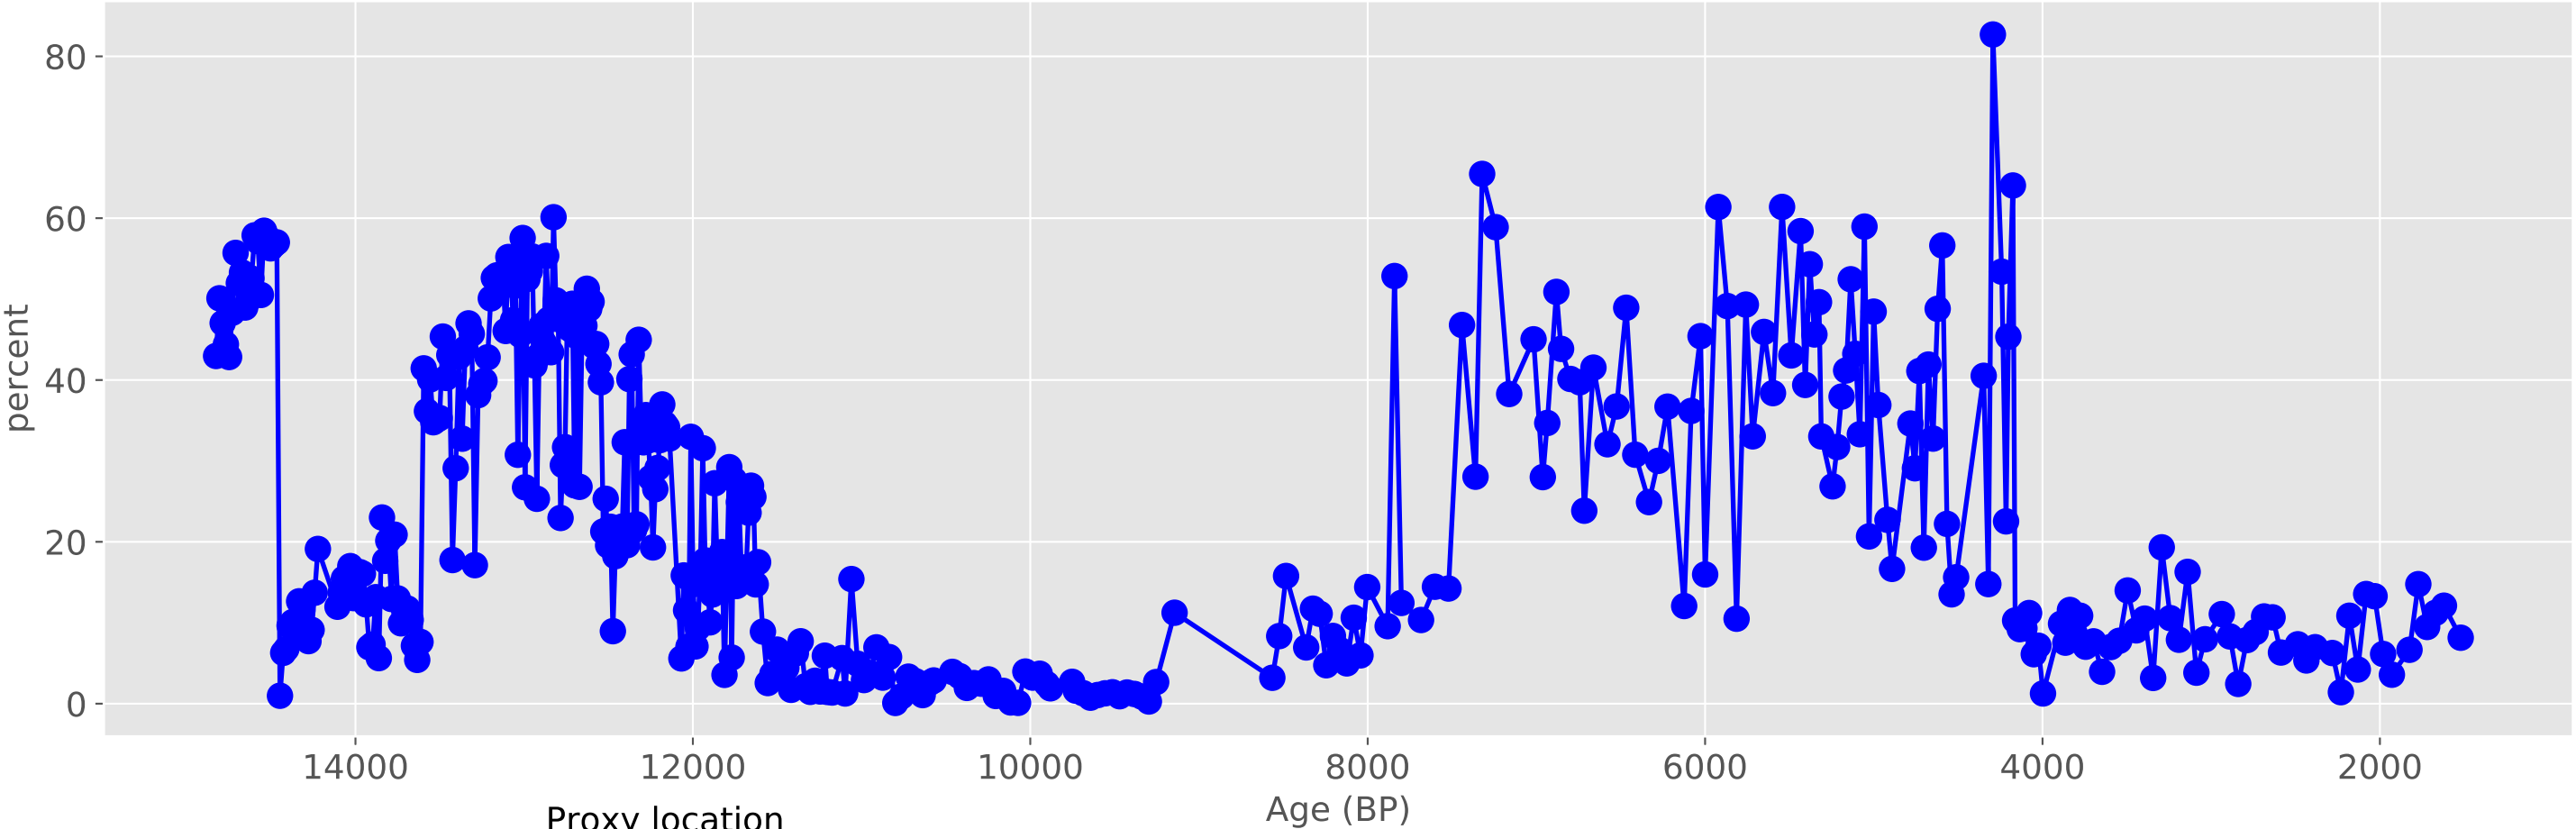

Proxy location  
(35.37 ° N, 116.14 ° W)



|                    |                                                                                              |
|--------------------|----------------------------------------------------------------------------------------------|
| Dataset name:      | SilverLake.Kirby.2015                                                                        |
| Archive type:      | LakeSediment                                                                                 |
| Proxy type:        | partical size                                                                                |
| Variable name:     | sand                                                                                         |
| Latitude ( ° N):   | 35.3669                                                                                      |
| Longitude ( ° E):  | -116.135                                                                                     |
| Elevation (m):     | 277.0                                                                                        |
| Interp. variable:  | P-E                                                                                          |
| Interp. detail:    | lakeLevel@surface                                                                            |
| Interp. season:    | annual                                                                                       |
| Interp. direction: | negative                                                                                     |
| Pub. 1 title:      | Evidence for insolation and Pacific forcing of lat...                                        |
| Pub. 1 authors:    | Kirby, Matthew E.;Knell, Edward J.;Anderson, Willi...                                        |
| Pub. 1 year:       | 2015                                                                                         |
| Pub. 1 DOI:        | 10.1016/j.yqres.2015.07.003                                                                  |
| Original data URL: | <a href="http://www.ncdc.noaa.gov/paleo/study/20106">www.ncdc.noaa.gov/paleo/study/20106</a> |

Proxy data and metadata  
**LakeSediment | partical size | Elsinore.Kirby.2019 | WEBa4950857**

Proxy time series: sand

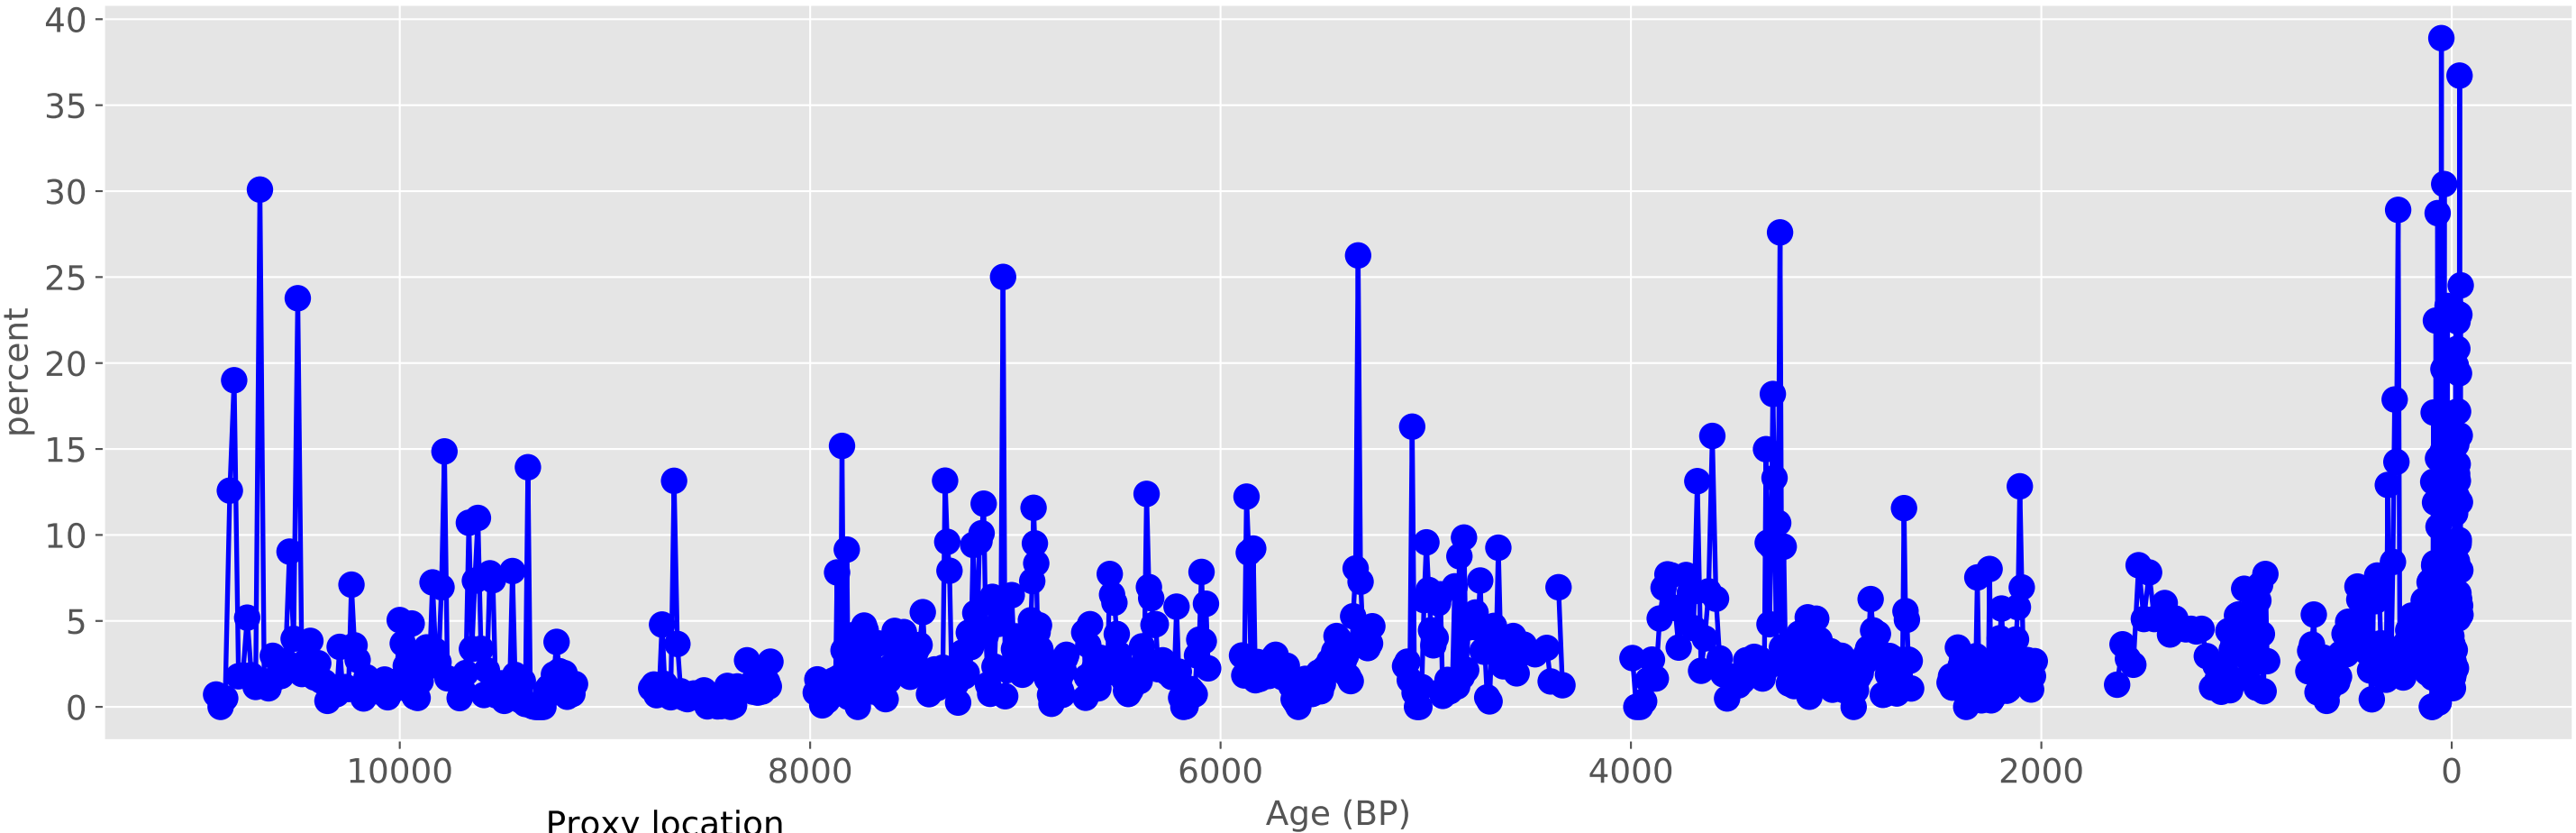

Proxy location  
(33.67 ° N, 117.35 ° W)

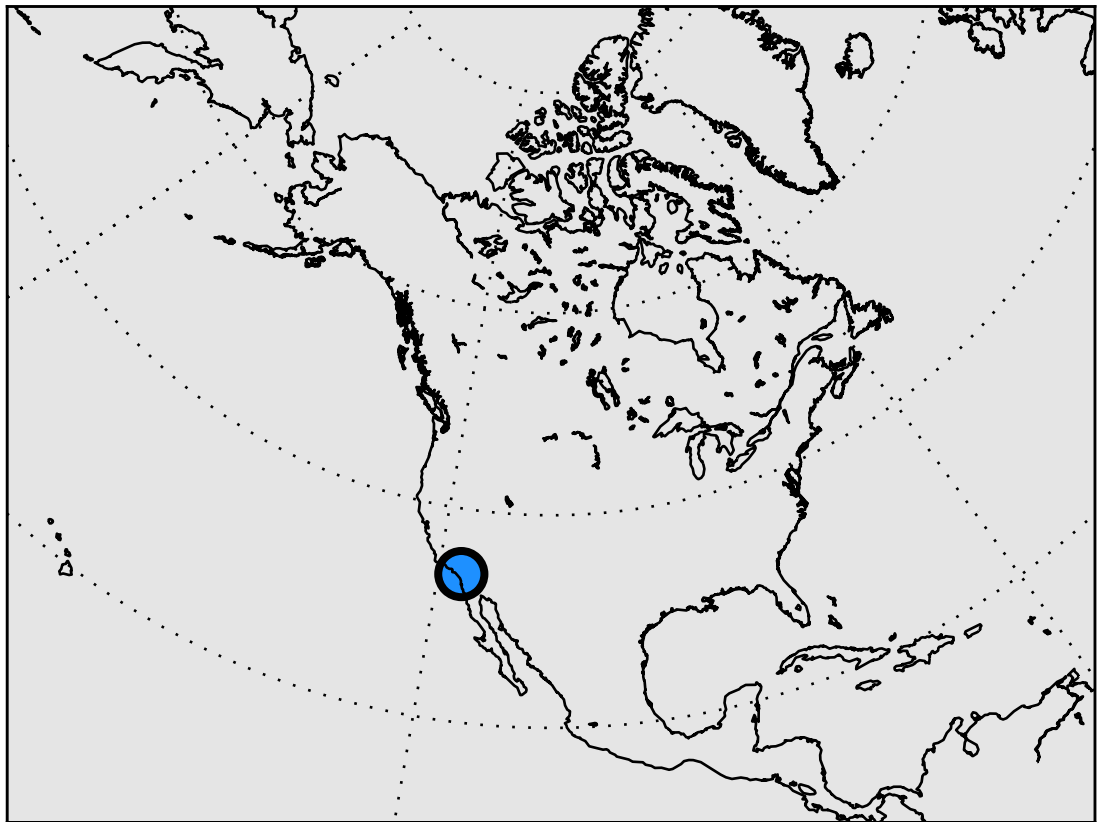

|                    |                                                                                              |
|--------------------|----------------------------------------------------------------------------------------------|
| Dataset name:      | Elsinore.Kirby.2019                                                                          |
| Archive type:      | LakeSediment                                                                                 |
| Proxy type:        | partical size                                                                                |
| Variable name:     | sand                                                                                         |
| Latitude ( ° N):   | 33.6733                                                                                      |
| Longitude ( ° E):  | -117.3542                                                                                    |
| Elevation (m):     | 379.0                                                                                        |
| Interp. variable:  | P                                                                                            |
| Interp. detail:    | runoff@surface                                                                               |
| Interp. season:    | winterOnly                                                                                   |
| Interp. direction: | positive                                                                                     |
| Pub. 1 title:      | Pacific Southwest United States Holocene Droughts ...                                        |
| Pub. 1 authors:    | Kirby, Matthew Edward Christopher;Patterson, Willi...                                        |
| Pub. 1 year:       | 2019                                                                                         |
| Pub. 1 DOI:        | 10.3389/feart.2019.00074                                                                     |
| Original data URL: | <a href="http://www.ncdc.noaa.gov/paleo/study/30232">www.ncdc.noaa.gov/paleo/study/30232</a> |

Proxy data and metadata

LakeSediment | pollen | BanksIsland-15.Gajewski.2000 | M2L33ant6mjP

Proxy time series: precipitation

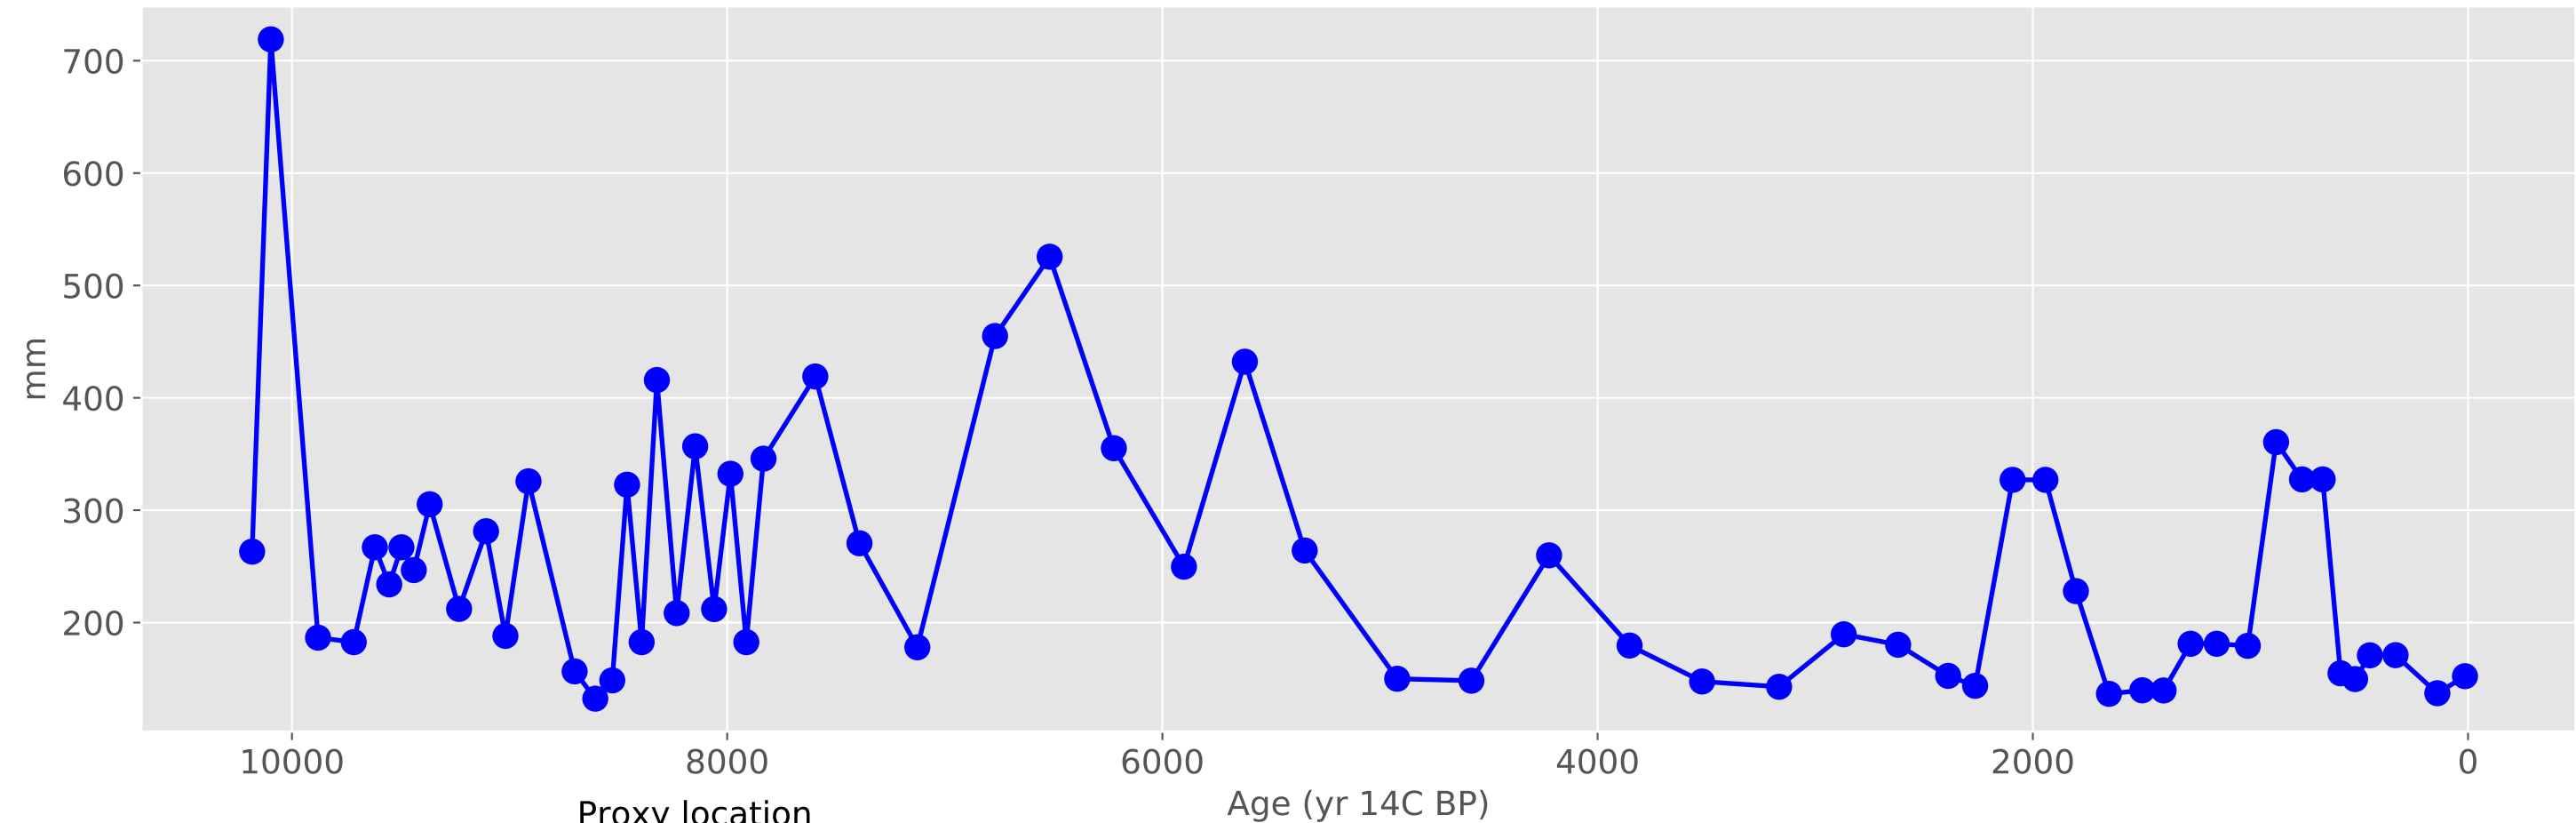

Proxy location  
(73.53 ° N, 120.22 ° W)

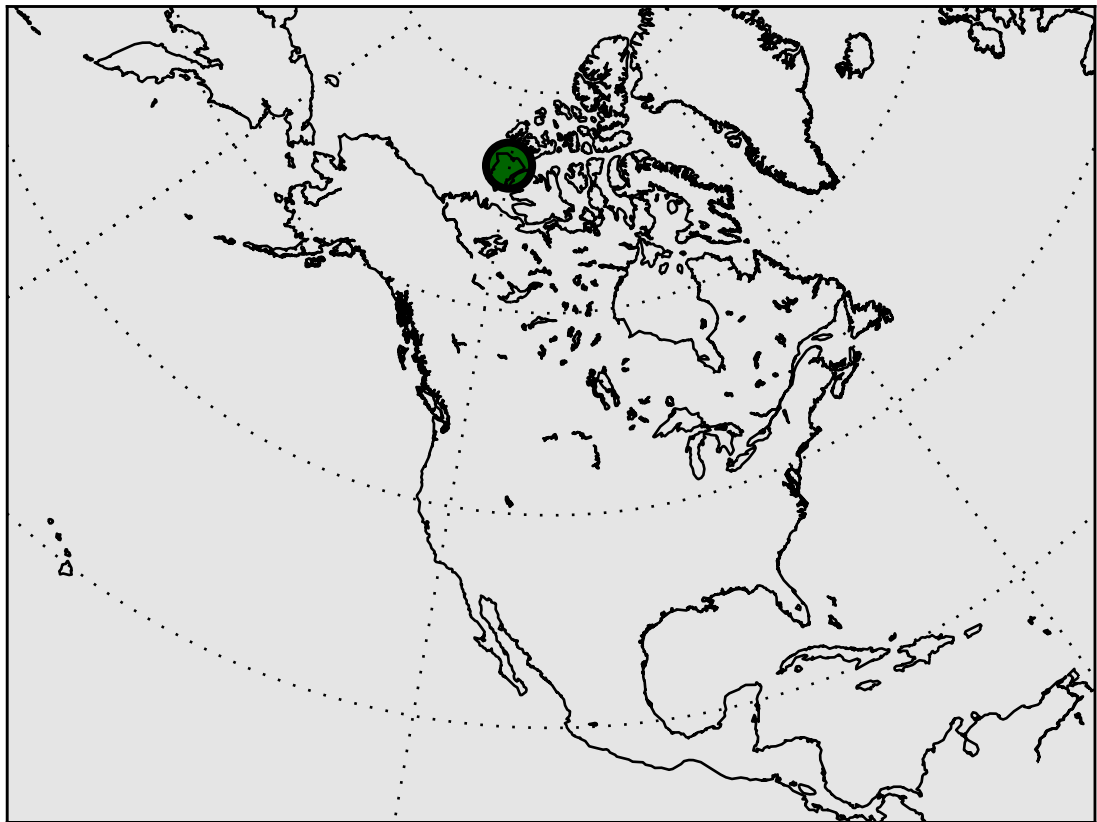

|                    |                                                                                              |
|--------------------|----------------------------------------------------------------------------------------------|
| Dataset name:      | BanksIsland-15.Gajewski.2000                                                                 |
| Archive type:      | LakeSediment                                                                                 |
| Proxy type:        | pollen                                                                                       |
| Variable name:     | precipitation                                                                                |
| Latitude ( ° N):   | 73.53                                                                                        |
| Longitude ( ° E):  | -120.22                                                                                      |
| Elevation (m):     | 120.0                                                                                        |
| Interp. variable:  | P                                                                                            |
| Interp. detail:    | amount@surface                                                                               |
| Interp. season:    | annual                                                                                       |
| Interp. direction: | positive                                                                                     |
| Pub. 1 title:      | Holocene vegetation history of Banks Island, North...                                        |
| Pub. 1 authors:    | Gajewski, K; Mott, R J; Ritchie, J C; Hadden, K                                              |
| Pub. 1 year:       | 2000                                                                                         |
| Pub. 1 DOI:        | 10.1139/b00-018                                                                              |
| Original data URL: | <a href="http://www.ncdc.noaa.gov/paleo/study/27330">www.ncdc.noaa.gov/paleo/study/27330</a> |

Proxy data and metadata  
**LakeSediment | pollen | BanksIsland-15.Gajewski.2000 | M2Lfdow59cgP**

Proxy time series: temperature

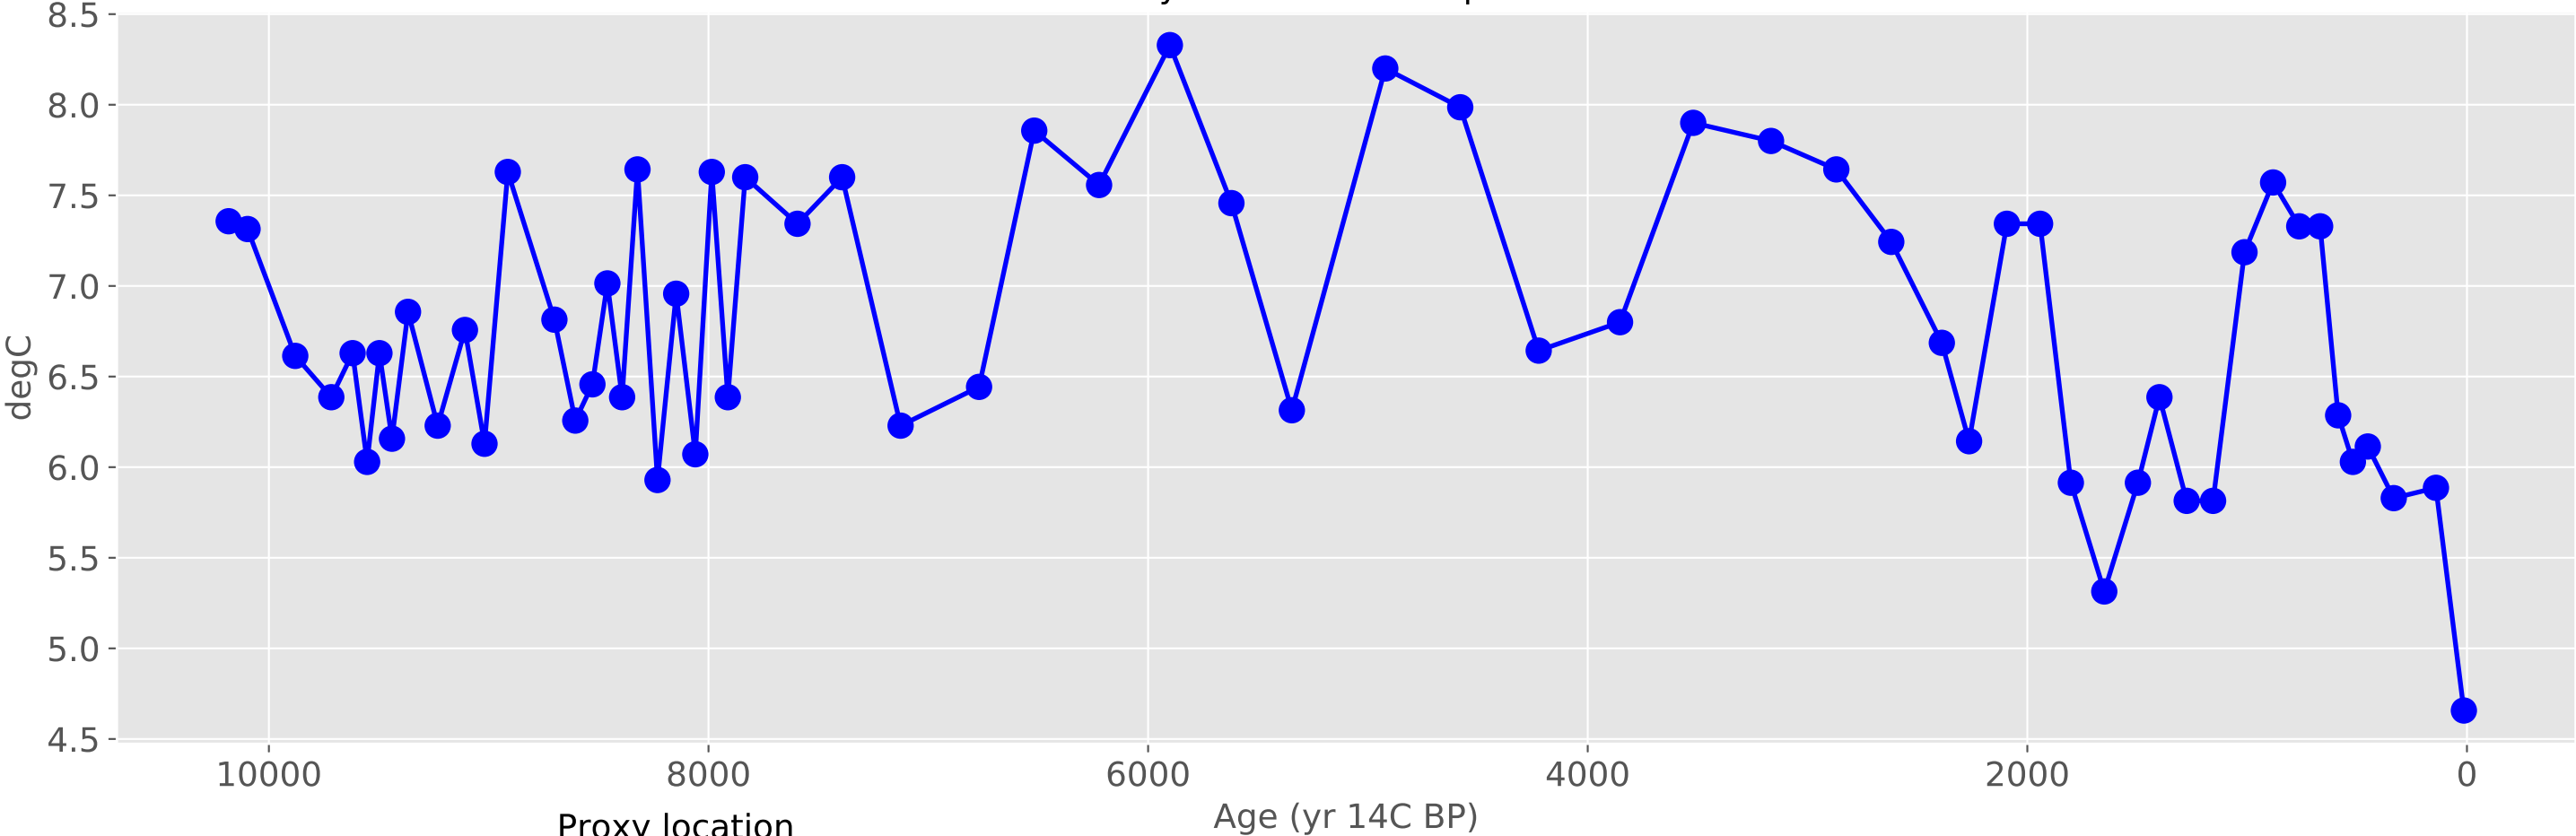

Proxy location  
(73.53 ° N, 120.22 ° W)

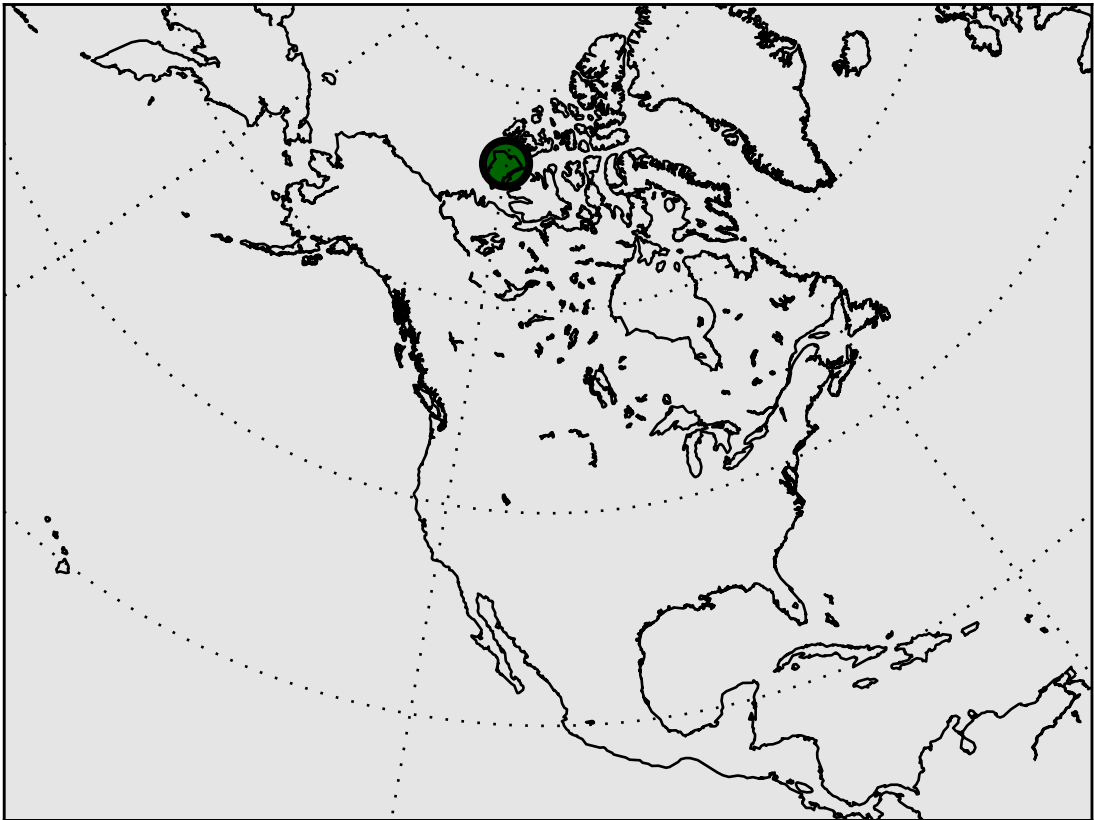

|                    |                                                                                              |
|--------------------|----------------------------------------------------------------------------------------------|
| Dataset name:      | BanksIsland-15.Gajewski.2000                                                                 |
| Archive type:      | LakeSediment                                                                                 |
| Proxy type:        | pollen                                                                                       |
| Variable name:     | temperature                                                                                  |
| Latitude ( ° N):   | 73.53                                                                                        |
| Longitude ( ° E):  | -120.22                                                                                      |
| Elevation (m):     | 120.0                                                                                        |
| Interp. variable:  | T                                                                                            |
| Interp. detail:    | air@surface                                                                                  |
| Interp. season:    | summer+                                                                                      |
| Interp. direction: | positive                                                                                     |
| Pub. 1 title:      | Holocene vegetation history of Banks Island, North...                                        |
| Pub. 1 authors:    | Gajewski, K; Mott, R J; Ritchie, J C; Hadden, K                                              |
| Pub. 1 year:       | 2000                                                                                         |
| Pub. 1 DOI:        | 10.1139/b00-018                                                                              |
| Original data URL: | <a href="http://www.ncdc.noaa.gov/paleo/study/27330">www.ncdc.noaa.gov/paleo/study/27330</a> |

Proxy data and metadata

LakeSediment | pollen | BanksIsland-15.Gajewski.2000 | M2LnpuqcuqIP

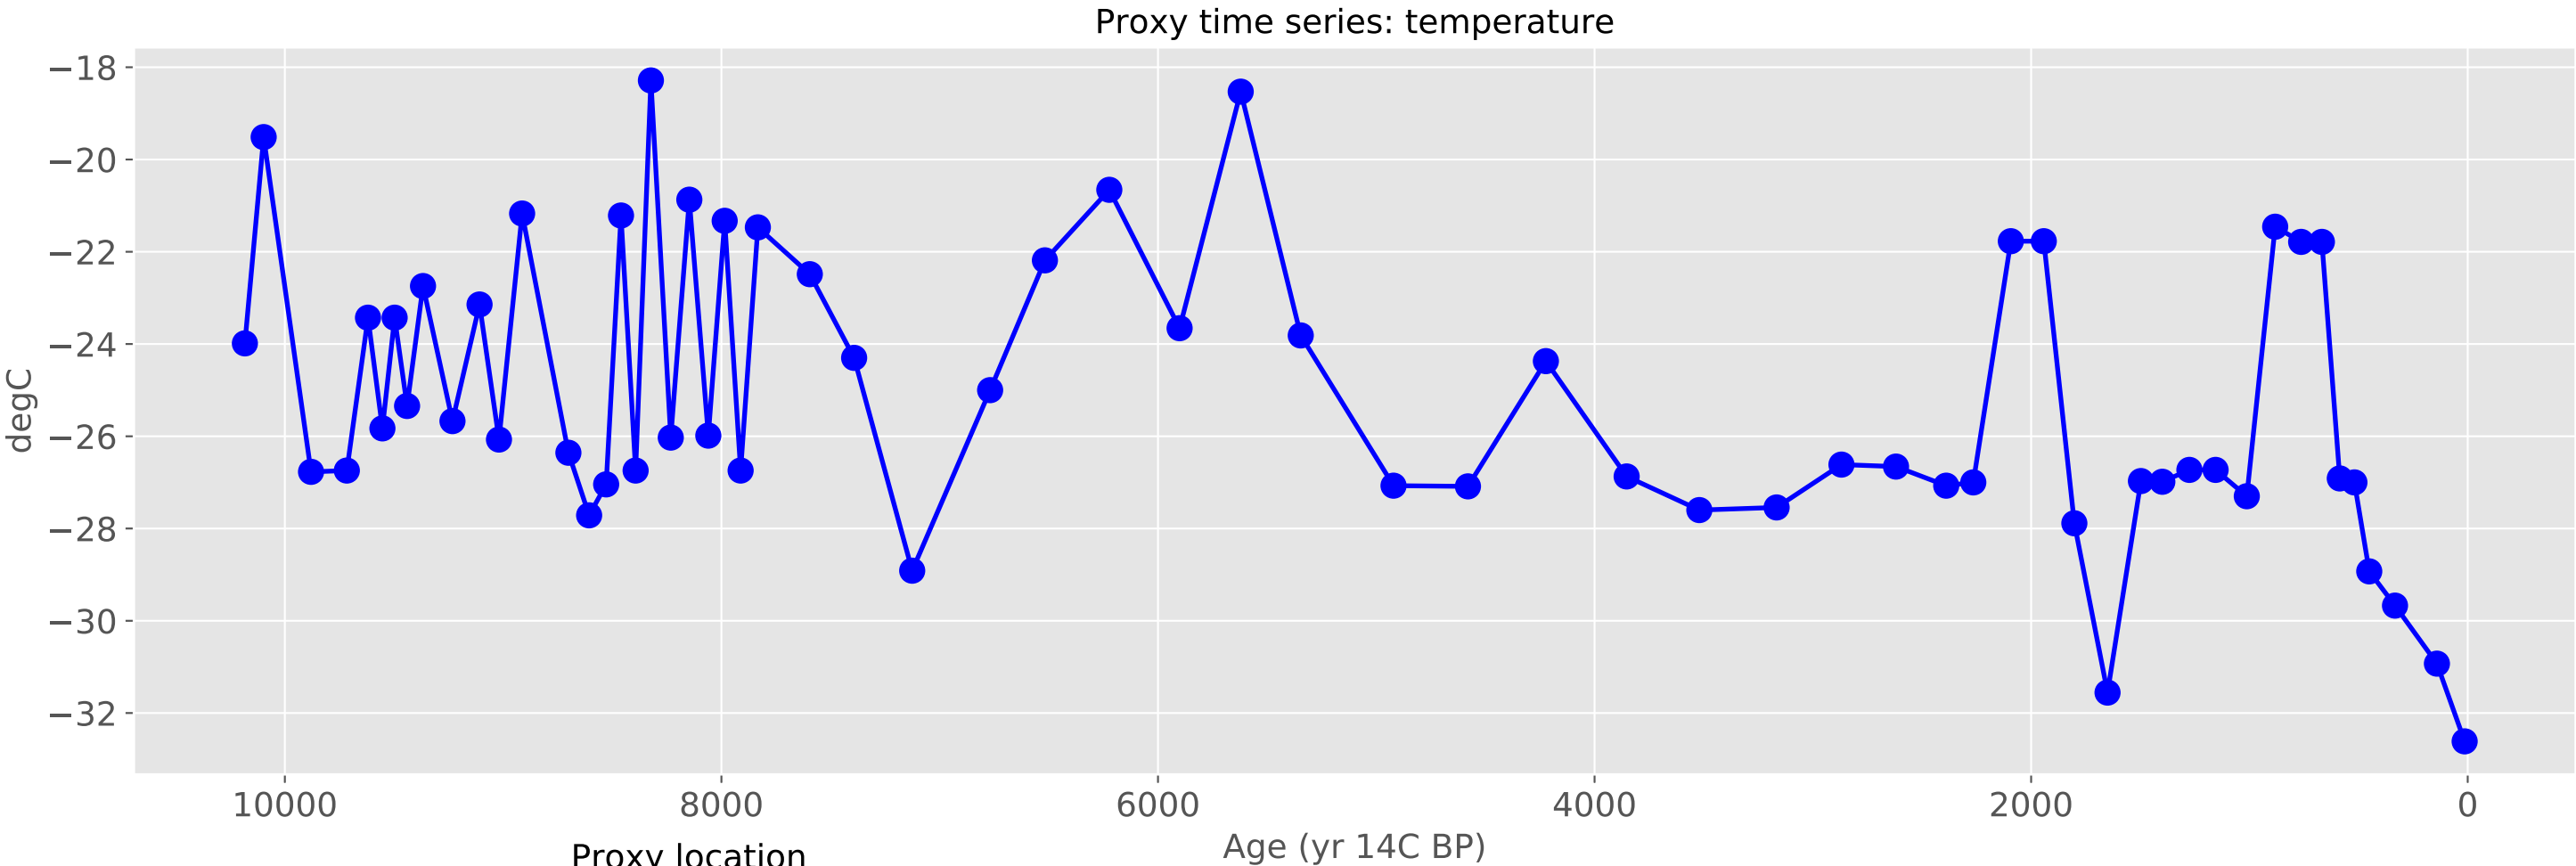

|                    |                                                                                              |
|--------------------|----------------------------------------------------------------------------------------------|
| Dataset name:      | BanksIsland-15.Gajewski.2000                                                                 |
| Archive type:      | LakeSediment                                                                                 |
| Proxy type:        | pollen                                                                                       |
| Variable name:     | temperature                                                                                  |
| Latitude ( ° N):   | 73.53                                                                                        |
| Longitude ( ° E):  | -120.22                                                                                      |
| Elevation (m):     | 120.0                                                                                        |
| Interp. variable:  | T                                                                                            |
| Interp. detail:    | air@surface                                                                                  |
| Interp. season:    | winter+                                                                                      |
| Interp. direction: | positive                                                                                     |
| Pub. 1 title:      | Holocene vegetation history of Banks Island, North...                                        |
| Pub. 1 authors:    | Gajewski, K; Mott, R J; Ritchie, J C; Hadden, K                                              |
| Pub. 1 year:       | 2000                                                                                         |
| Pub. 1 DOI:        | 10.1139/b00-018                                                                              |
| Original data URL: | <a href="http://www.ncdc.noaa.gov/paleo/study/27330">www.ncdc.noaa.gov/paleo/study/27330</a> |

Proxy data and metadata

LakeSediment | pollen | BanksIsland-15.Gajewski.2000 | M2Lqd7jeqa8P

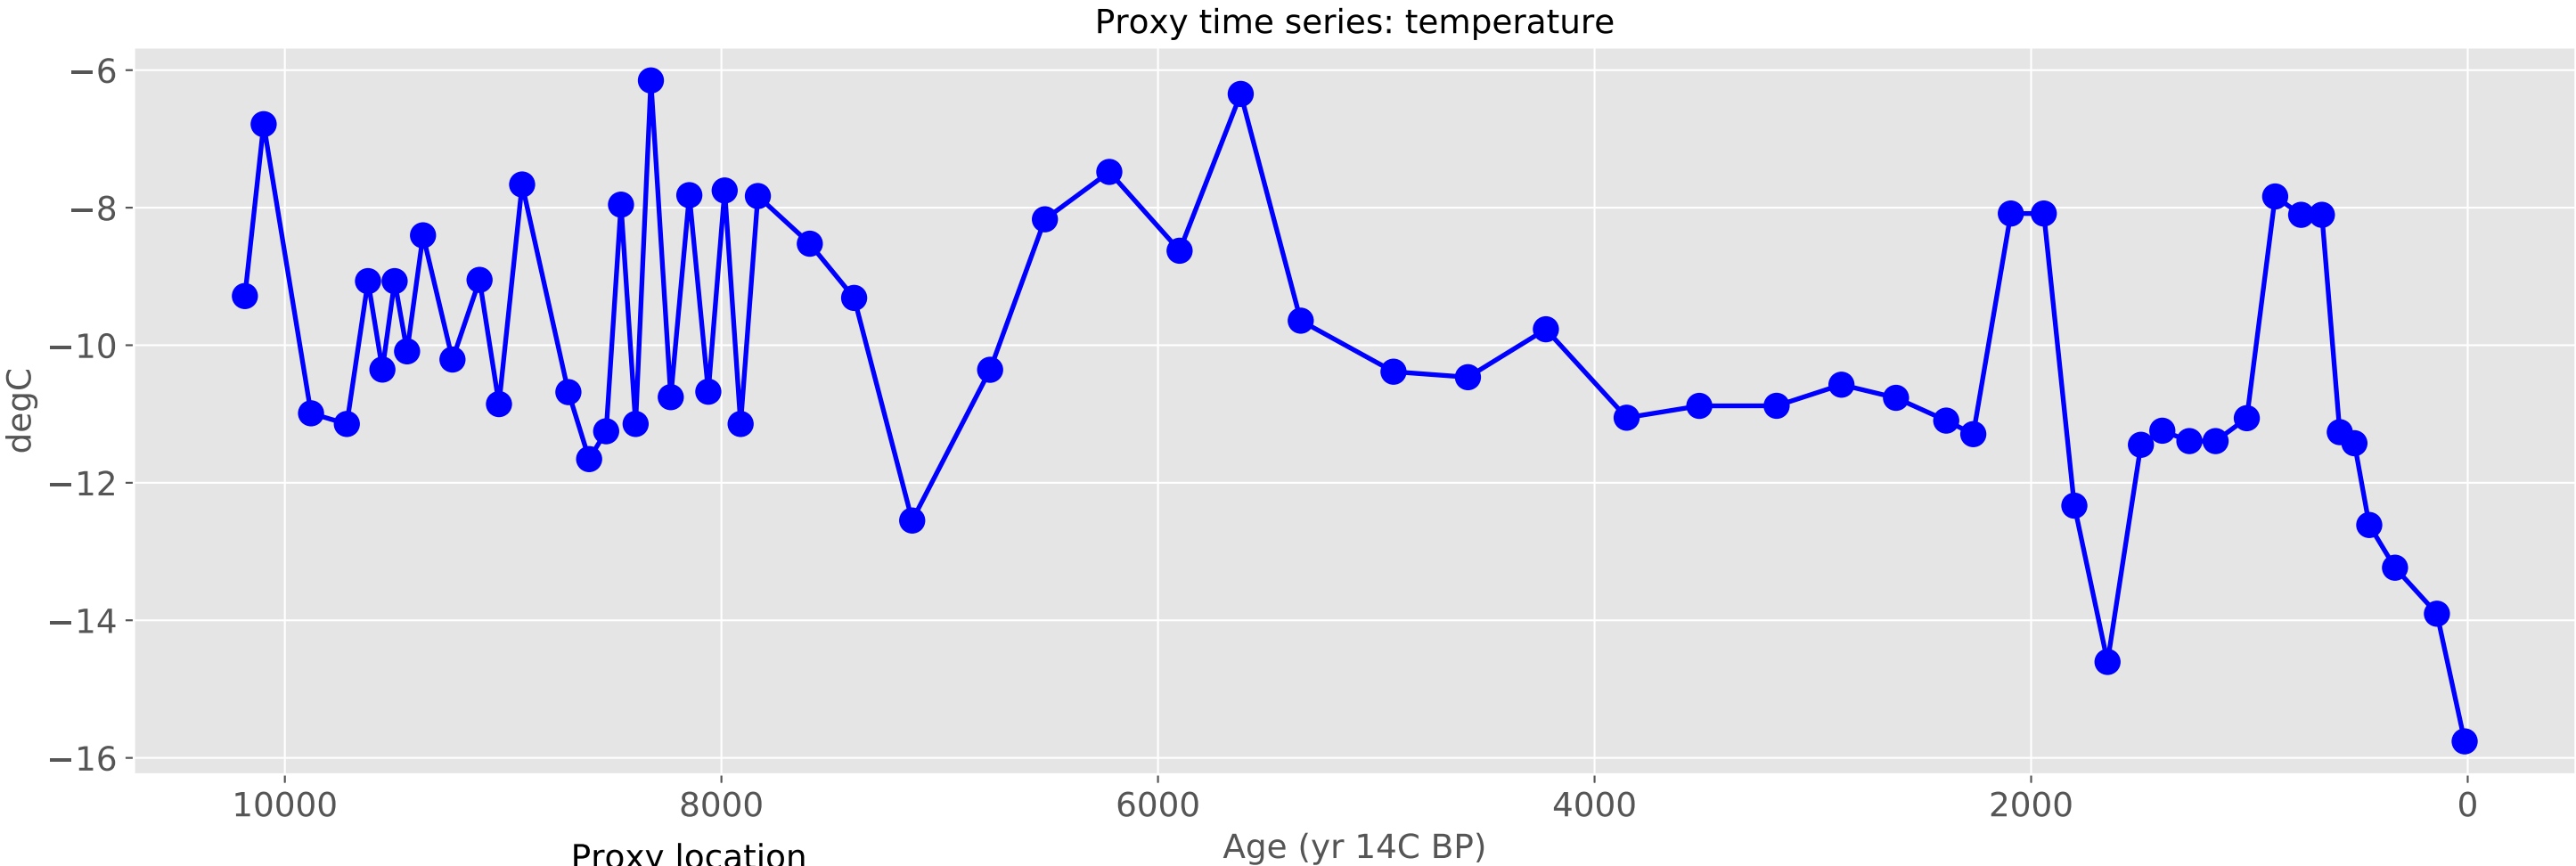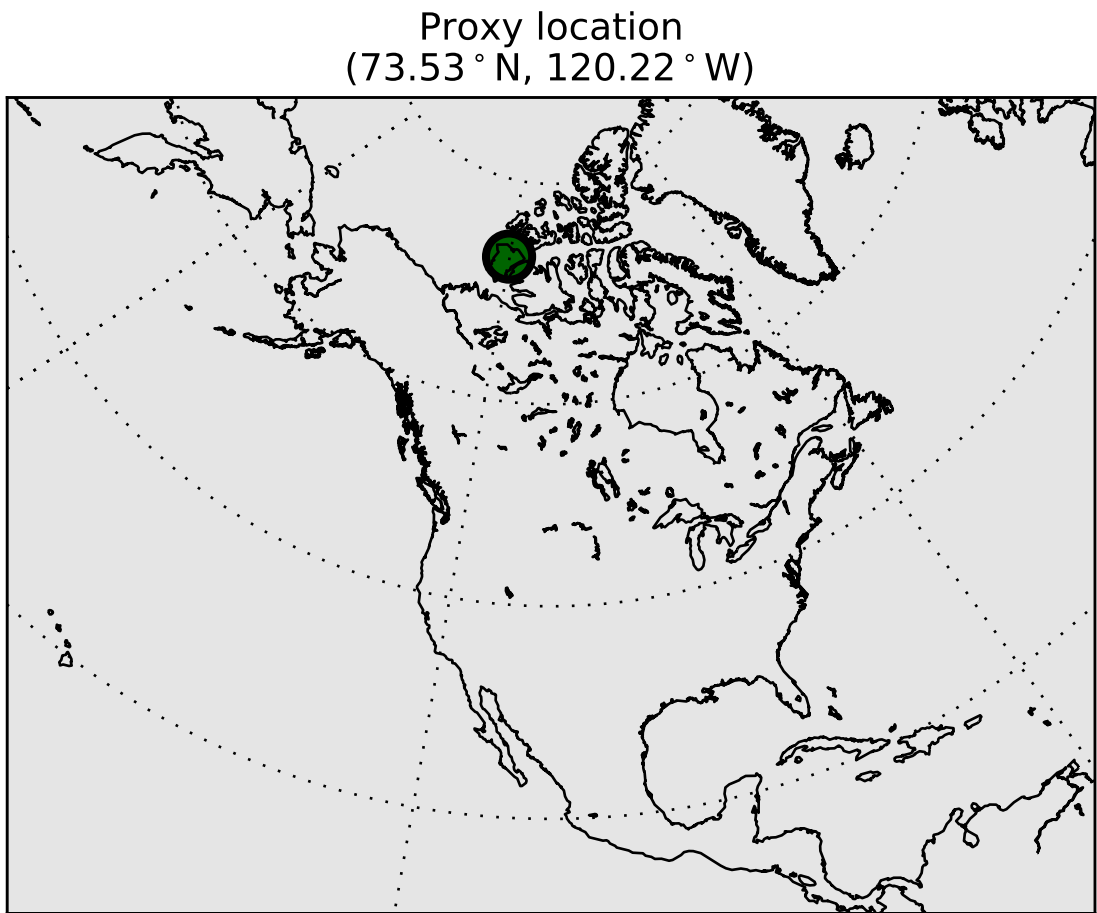

|                    |                                                                                              |
|--------------------|----------------------------------------------------------------------------------------------|
| Dataset name:      | BanksIsland-15.Gajewski.2000                                                                 |
| Archive type:      | LakeSediment                                                                                 |
| Proxy type:        | pollen                                                                                       |
| Variable name:     | temperature                                                                                  |
| Latitude ( ° N):   | 73.53                                                                                        |
| Longitude ( ° E):  | -120.22                                                                                      |
| Elevation (m):     | 120.0                                                                                        |
| Interp. variable:  | T                                                                                            |
| Interp. detail:    | air@surface                                                                                  |
| Interp. season:    | annual                                                                                       |
| Interp. direction: | positive                                                                                     |
| Pub. 1 title:      | Holocene vegetation history of Banks Island, North...                                        |
| Pub. 1 authors:    | Gajewski, K; Mott, R J; Ritchie, J C; Hadden, K                                              |
| Pub. 1 year:       | 2000                                                                                         |
| Pub. 1 DOI:        | 10.1139/b00-018                                                                              |
| Original data URL: | <a href="http://www.ncdc.noaa.gov/paleo/study/27330">www.ncdc.noaa.gov/paleo/study/27330</a> |



Proxy data and metadata

LakeSediment | pollen | BanksIsland-12.Gajewski.2000 | M2L4bz5nk5qP

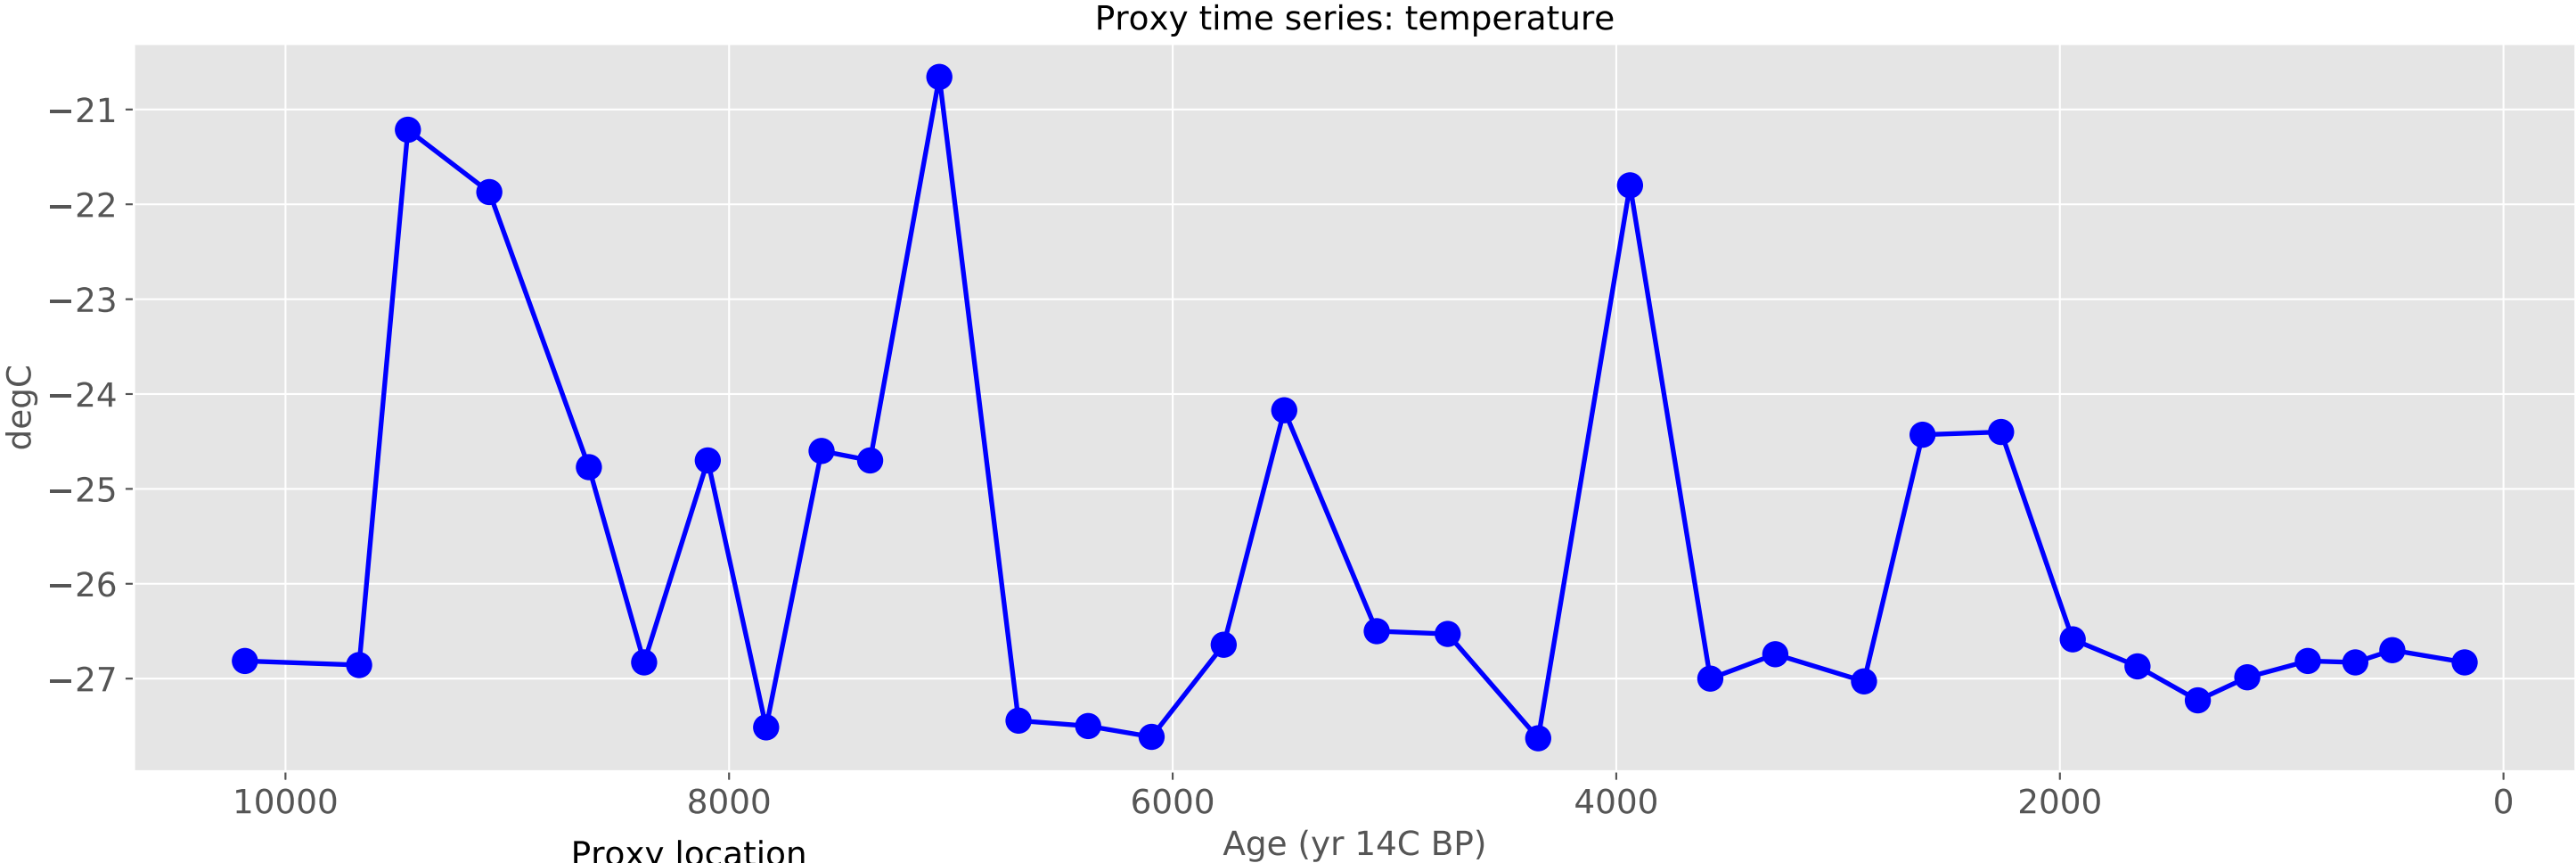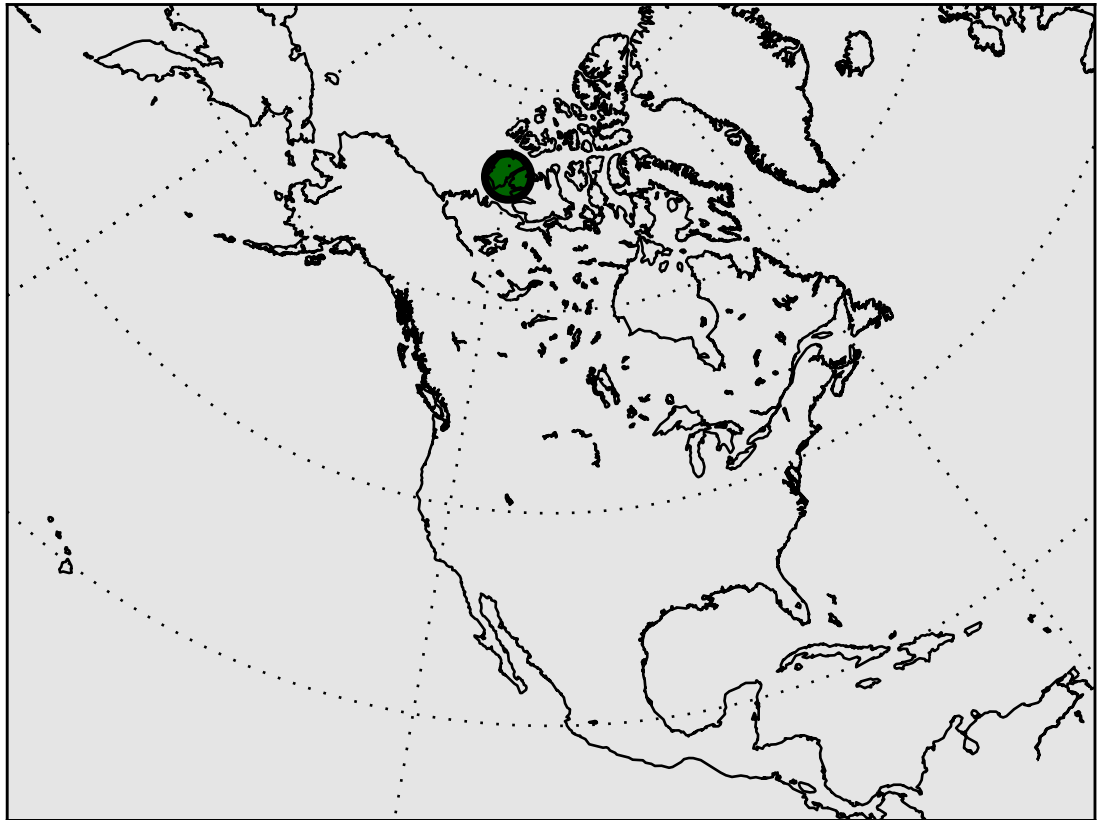

|                    |                                                                                              |
|--------------------|----------------------------------------------------------------------------------------------|
| Dataset name:      | BanksIsland-12.Gajewski.2000                                                                 |
| Archive type:      | LakeSediment                                                                                 |
| Proxy type:        | pollen                                                                                       |
| Variable name:     | temperature                                                                                  |
| Latitude (° N):    | 72.37                                                                                        |
| Longitude (° E):   | -119.83                                                                                      |
| Elevation (m):     | 220.0                                                                                        |
| Interp. variable:  | T                                                                                            |
| Interp. detail:    | air@surface                                                                                  |
| Interp. season:    | winter+                                                                                      |
| Interp. direction: | positive                                                                                     |
| Pub. 1 title:      | Holocene vegetation history of Banks Island, North...                                        |
| Pub. 1 authors:    | Gajewski, K; Mott, R J; Ritchie, J C; Hadden, K                                              |
| Pub. 1 year:       | 2000                                                                                         |
| Pub. 1 DOI:        | 10.1139/b00-018                                                                              |
| Original data URL: | <a href="http://www.ncdc.noaa.gov/paleo/study/27330">www.ncdc.noaa.gov/paleo/study/27330</a> |

Proxy data and metadata

LakeSediment | pollen | BanksIsland-12.Gajewski.2000 | M2L4ptir6l2P

Proxy time series: temperature

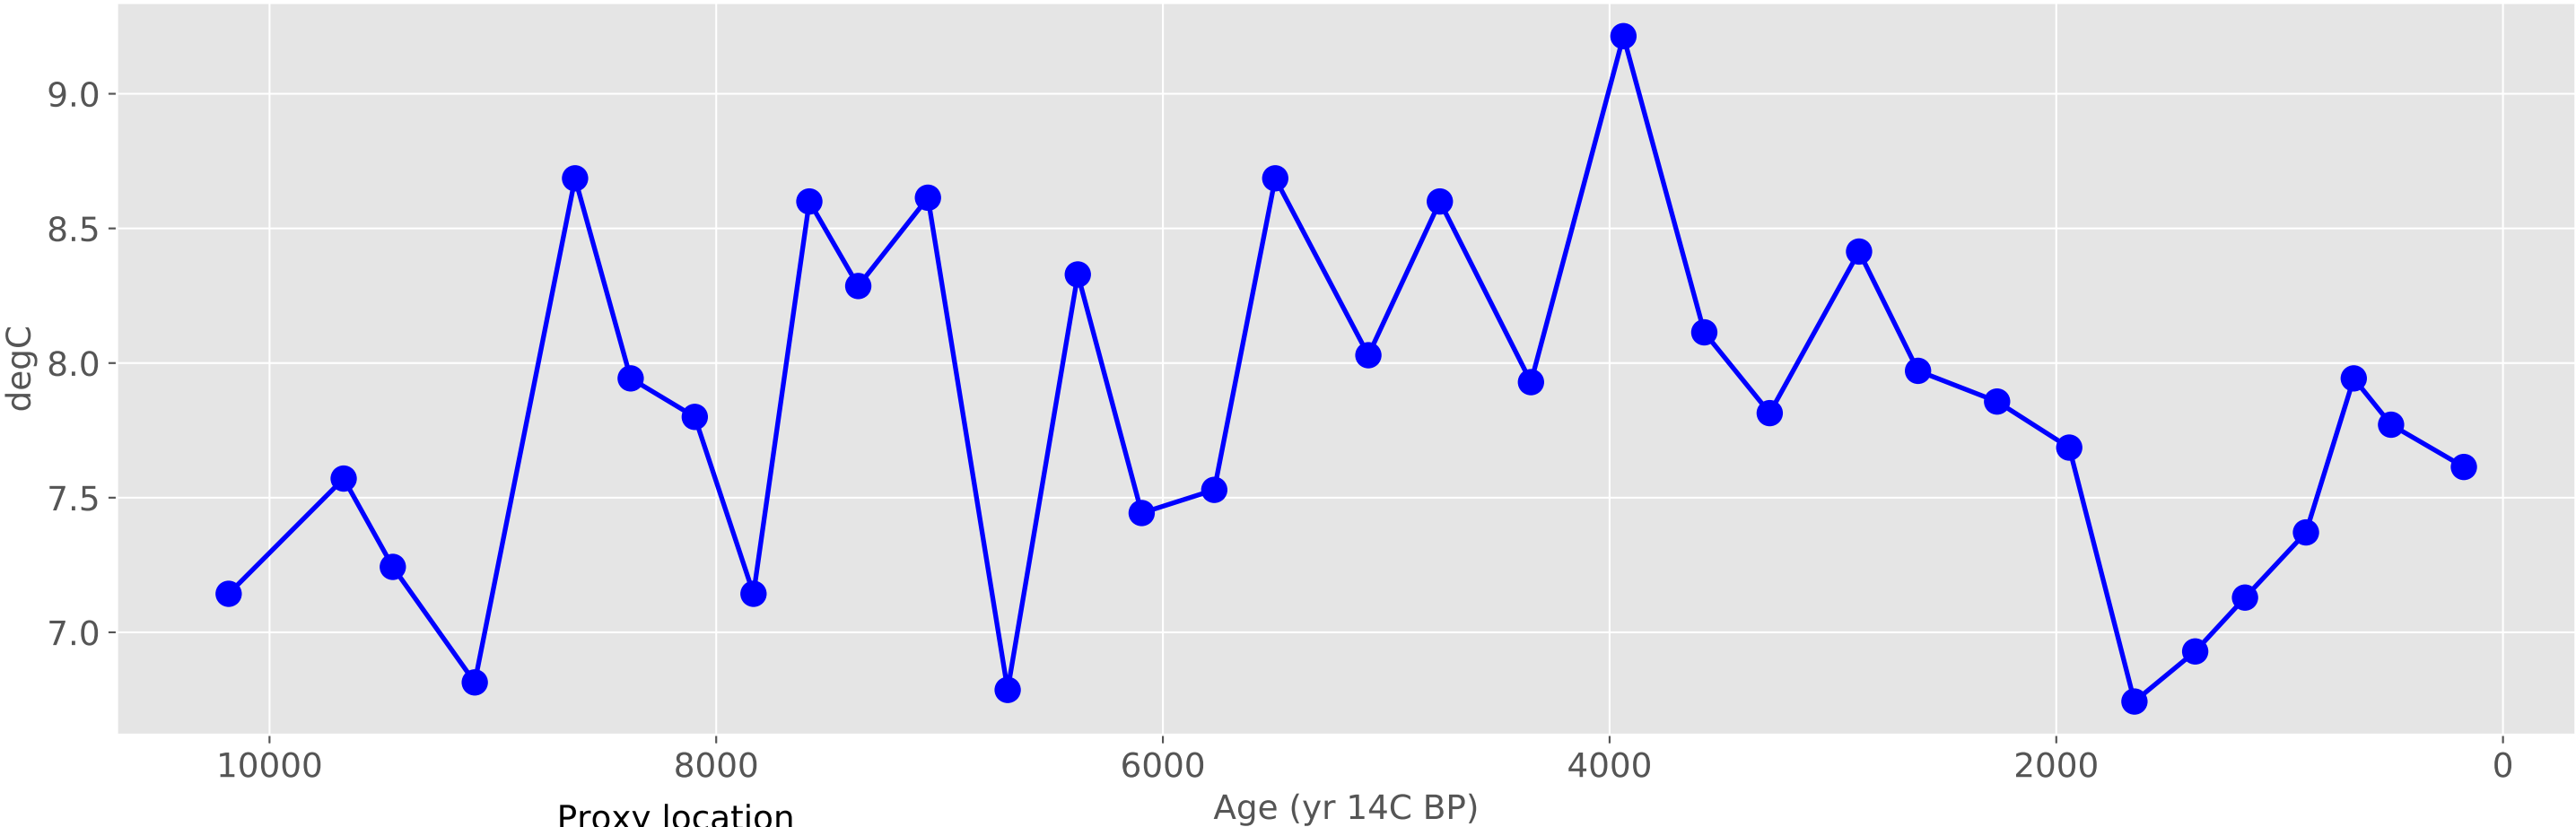

Proxy location  
(72.37 ° N, 119.83 ° W)

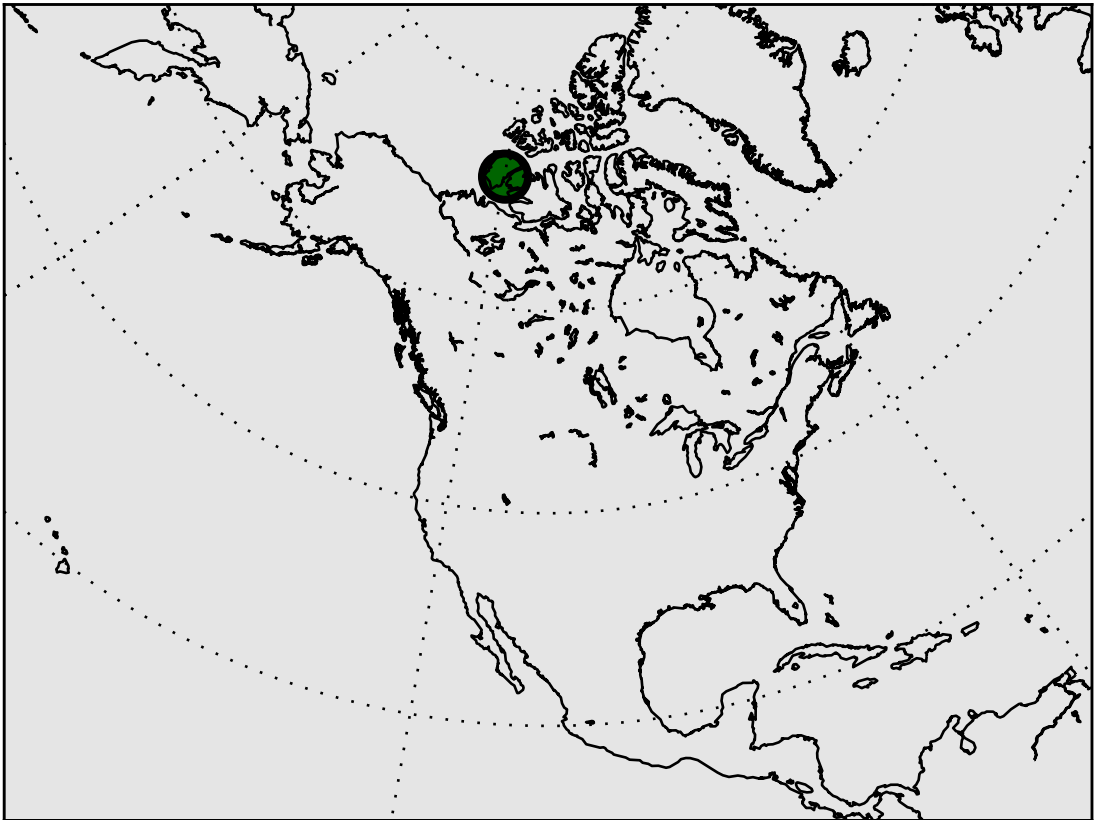

|                    |                                                                                              |
|--------------------|----------------------------------------------------------------------------------------------|
| Dataset name:      | BanksIsland-12.Gajewski.2000                                                                 |
| Archive type:      | LakeSediment                                                                                 |
| Proxy type:        | pollen                                                                                       |
| Variable name:     | temperature                                                                                  |
| Latitude ( ° N):   | 72.37                                                                                        |
| Longitude ( ° E):  | -119.83                                                                                      |
| Elevation (m):     | 220.0                                                                                        |
| Interp. variable:  | T                                                                                            |
| Interp. detail:    | air@surface                                                                                  |
| Interp. season:    | summer+                                                                                      |
| Interp. direction: | positive                                                                                     |
| Pub. 1 title:      | Holocene vegetation history of Banks Island, North...                                        |
| Pub. 1 authors:    | Gajewski, K; Mott, R J; Ritchie, J C; Hadden, K                                              |
| Pub. 1 year:       | 2000                                                                                         |
| Pub. 1 DOI:        | 10.1139/b00-018                                                                              |
| Original data URL: | <a href="http://www.ncdc.noaa.gov/paleo/study/27330">www.ncdc.noaa.gov/paleo/study/27330</a> |

Proxy data and metadata  
LakeSediment | pollen | Hanging.Cwynar.1982 | M2L6h0g3irsP

Proxy time series: temperature

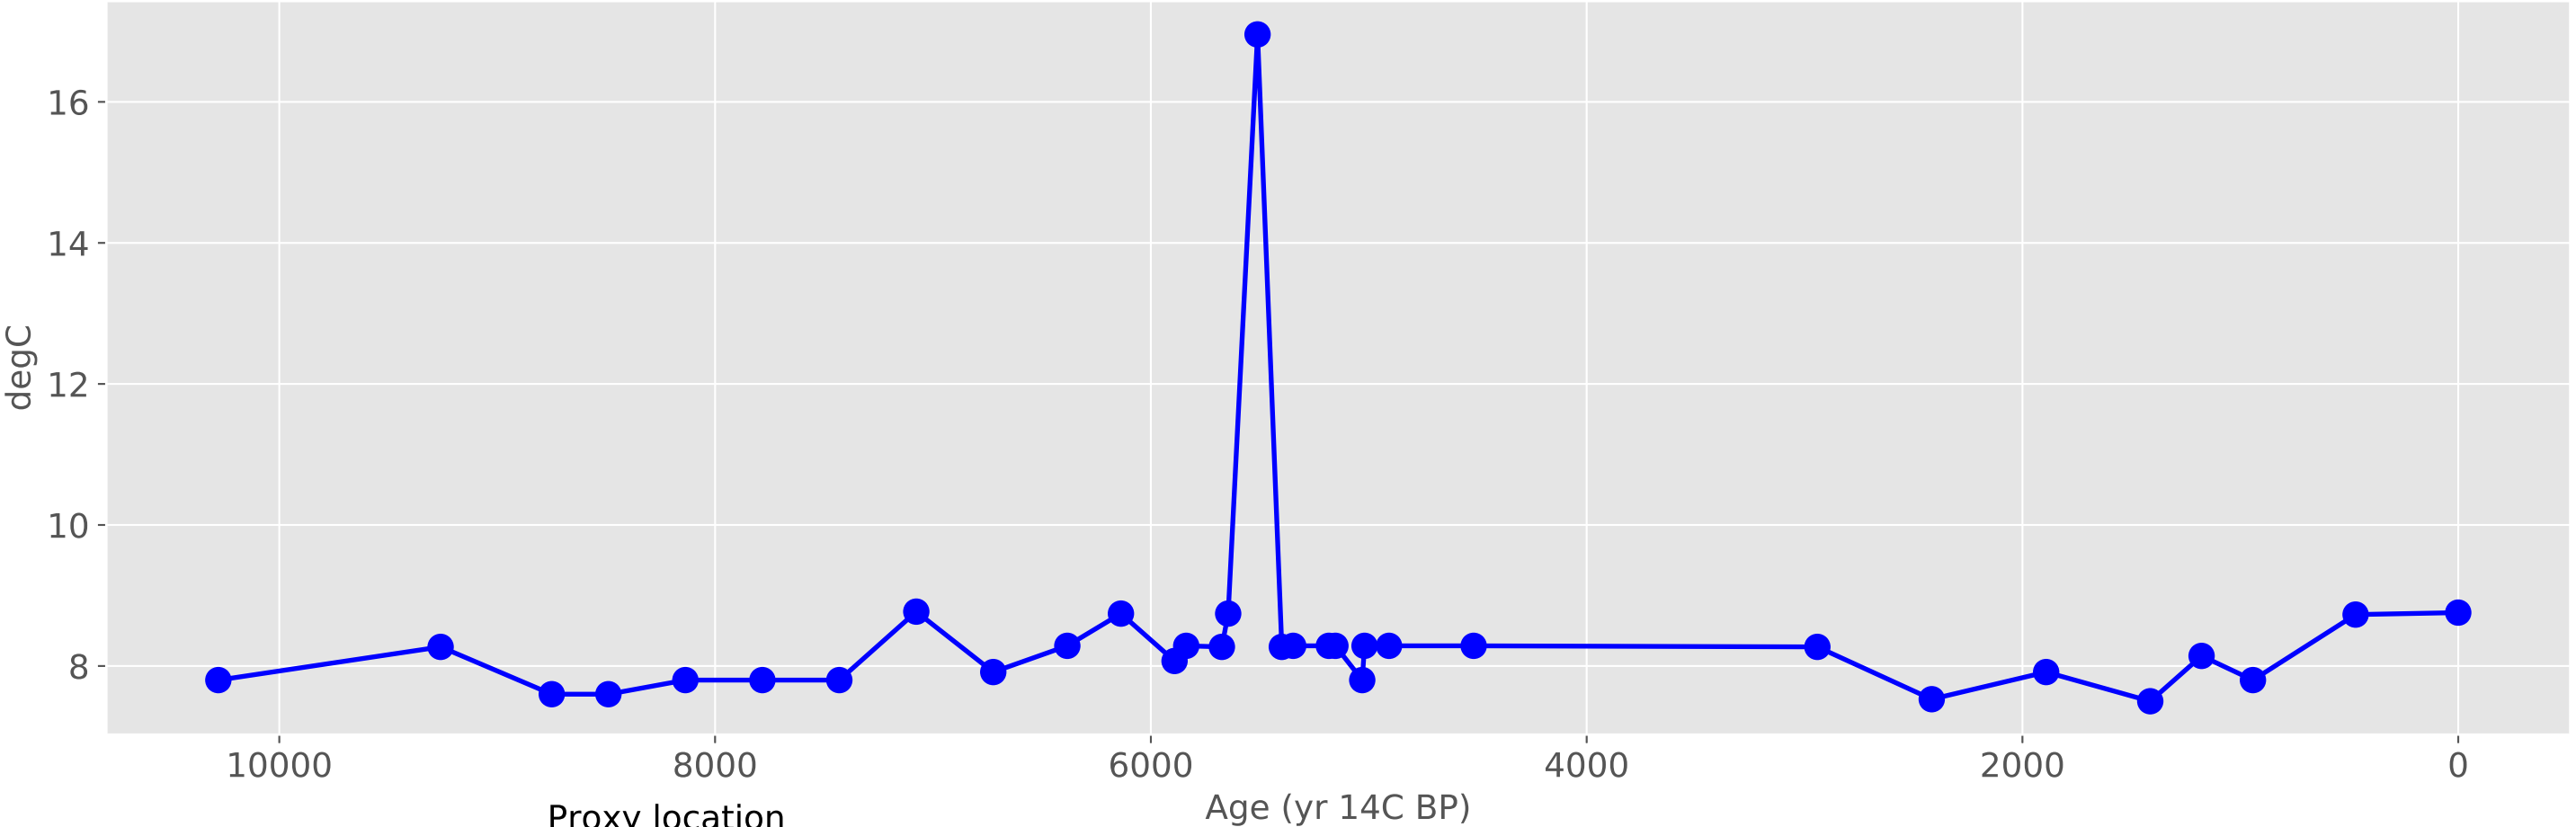

Proxy location  
(68.38 ° N, 138.38 ° W)

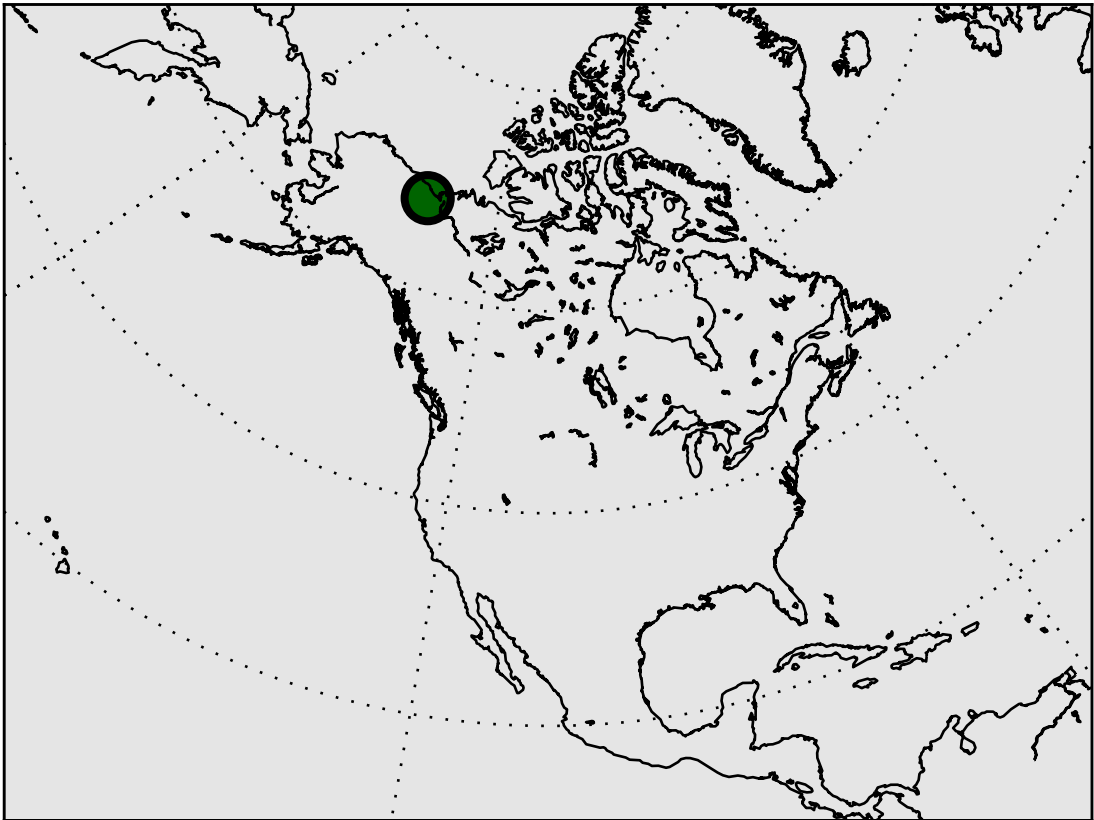

|                    |                                                                                              |
|--------------------|----------------------------------------------------------------------------------------------|
| Dataset name:      | Hanging.Cwynar.1982                                                                          |
| Archive type:      | LakeSediment                                                                                 |
| Proxy type:        | pollen                                                                                       |
| Variable name:     | temperature                                                                                  |
| Latitude ( ° N):   | 68.38                                                                                        |
| Longitude ( ° E):  | -138.38                                                                                      |
| Elevation (m):     | 500.0                                                                                        |
| Interp. variable:  | T                                                                                            |
| Interp. detail:    | air@surface                                                                                  |
| Interp. season:    | summer+                                                                                      |
| Interp. direction: | positive                                                                                     |
| Pub. 1 title:      | A Late-Quaternary vegetation history from Hanging ...                                        |
| Pub. 1 authors:    | Cwynar, Les C.                                                                               |
| Pub. 1 year:       | 1982                                                                                         |
| Pub. 1 DOI:        | 10.2307/2937342                                                                              |
| Original data URL: | <a href="http://www.ncdc.noaa.gov/paleo/study/27330">www.ncdc.noaa.gov/paleo/study/27330</a> |

Proxy data and metadata  
LakeSediment | pollen | Hanging.Cwynar.1982 | M2L9ewaug0vP

Proxy time series: temperature

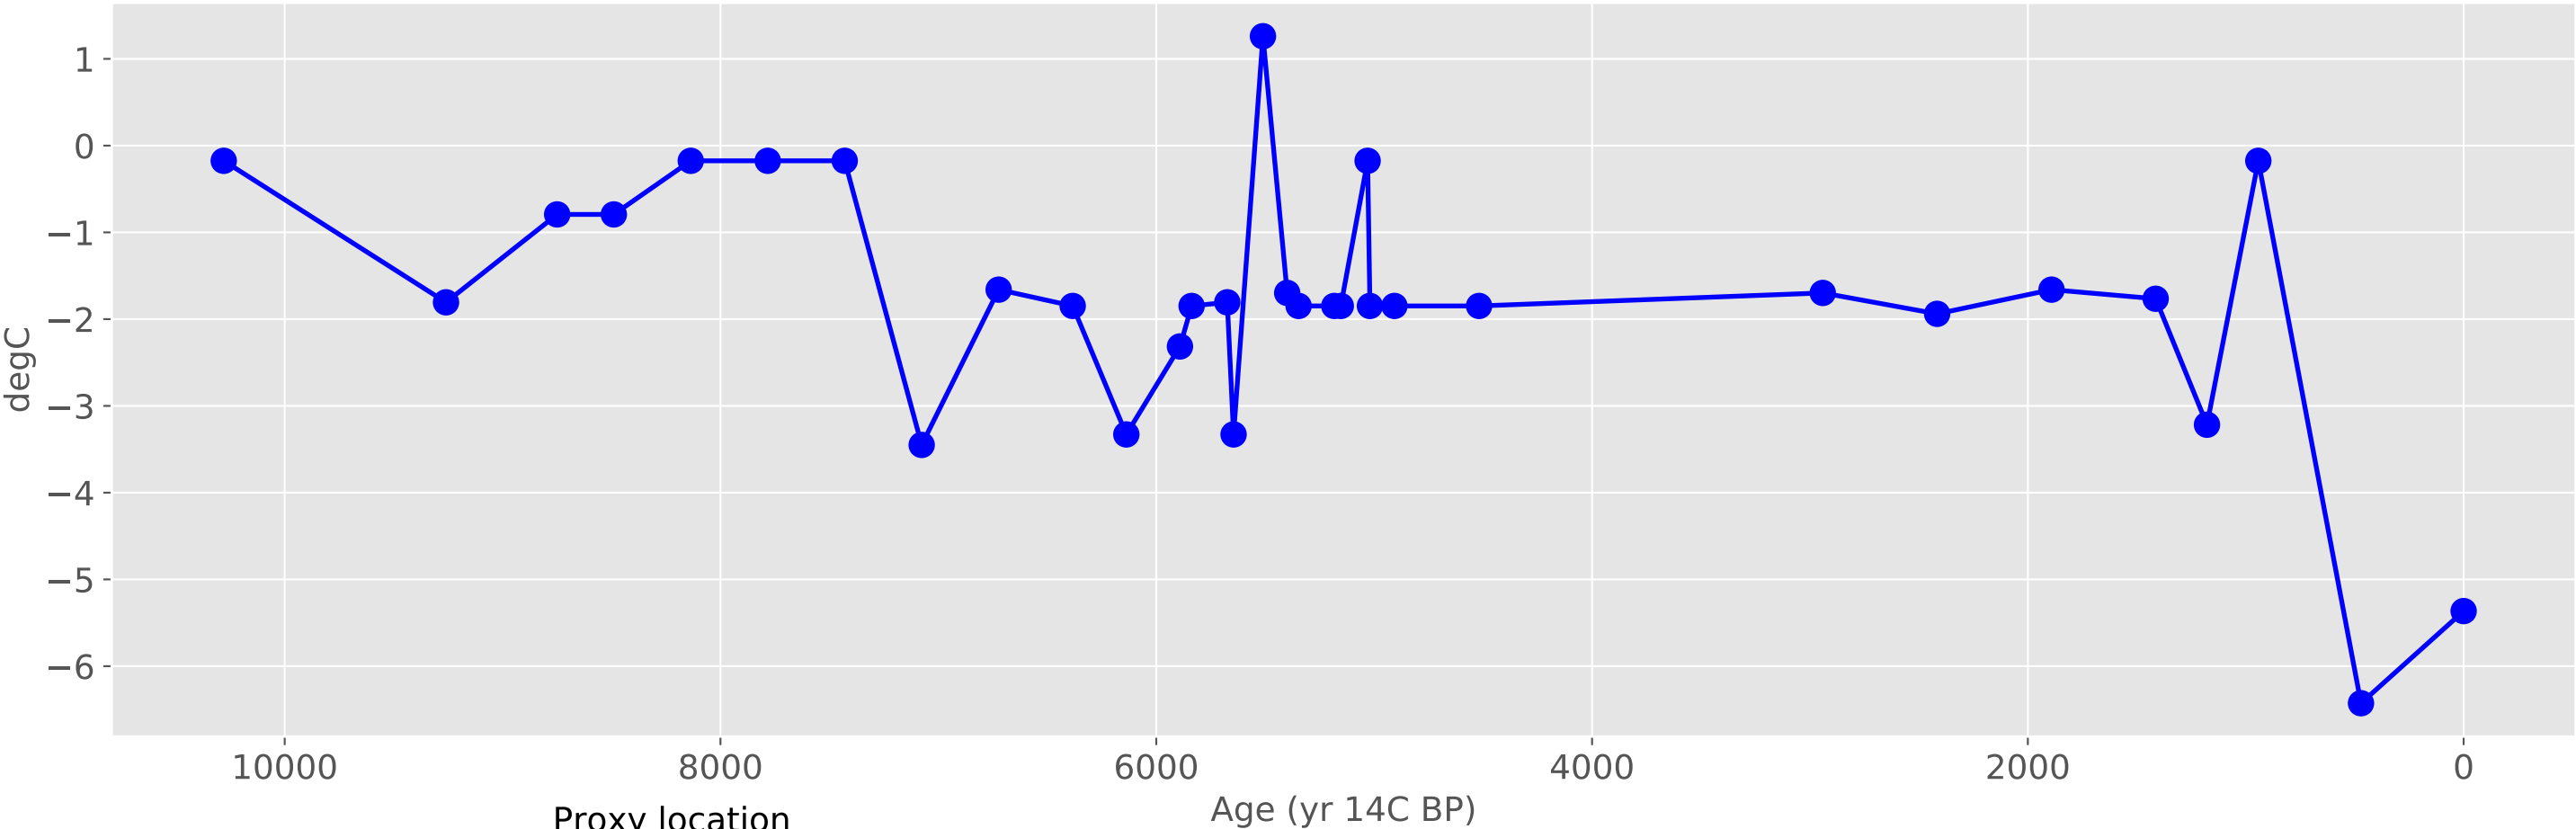

Proxy location  
(68.38 ° N, 138.38 ° W)

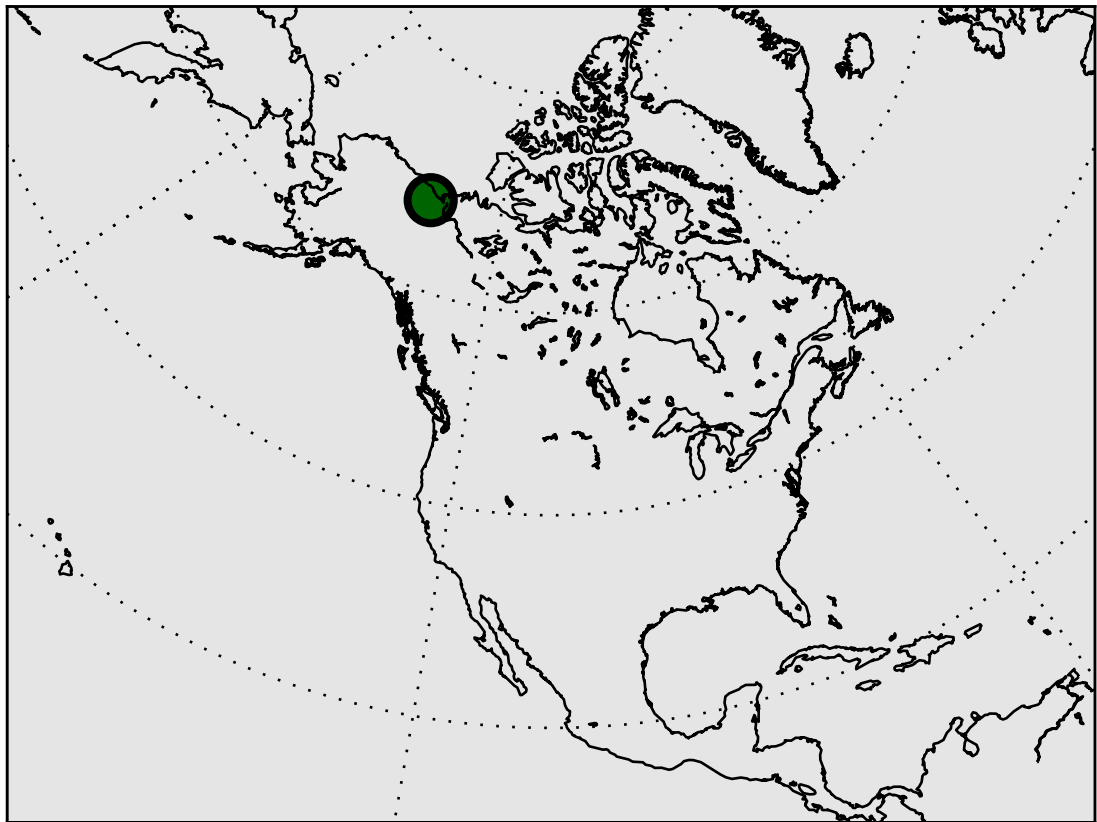

|                    |                                                                                              |
|--------------------|----------------------------------------------------------------------------------------------|
| Dataset name:      | Hanging.Cwynar.1982                                                                          |
| Archive type:      | LakeSediment                                                                                 |
| Proxy type:        | pollen                                                                                       |
| Variable name:     | temperature                                                                                  |
| Latitude ( ° N):   | 68.38                                                                                        |
| Longitude ( ° E):  | -138.38                                                                                      |
| Elevation (m):     | 500.0                                                                                        |
| Interp. variable:  | T                                                                                            |
| Interp. detail:    | air@surface                                                                                  |
| Interp. season:    | annual                                                                                       |
| Interp. direction: | positive                                                                                     |
| Pub. 1 title:      | A Late-Quaternary vegetation history from Hanging ...                                        |
| Pub. 1 authors:    | Cwynar, Les C.                                                                               |
| Pub. 1 year:       | 1982                                                                                         |
| Pub. 1 DOI:        | 10.2307/2937342                                                                              |
| Original data URL: | <a href="http://www.ncdc.noaa.gov/paleo/study/27330">www.ncdc.noaa.gov/paleo/study/27330</a> |

Proxy data and metadata  
LakeSediment | pollen | Hanging.Cwynar.1982 | M2Lx11tsy4kP

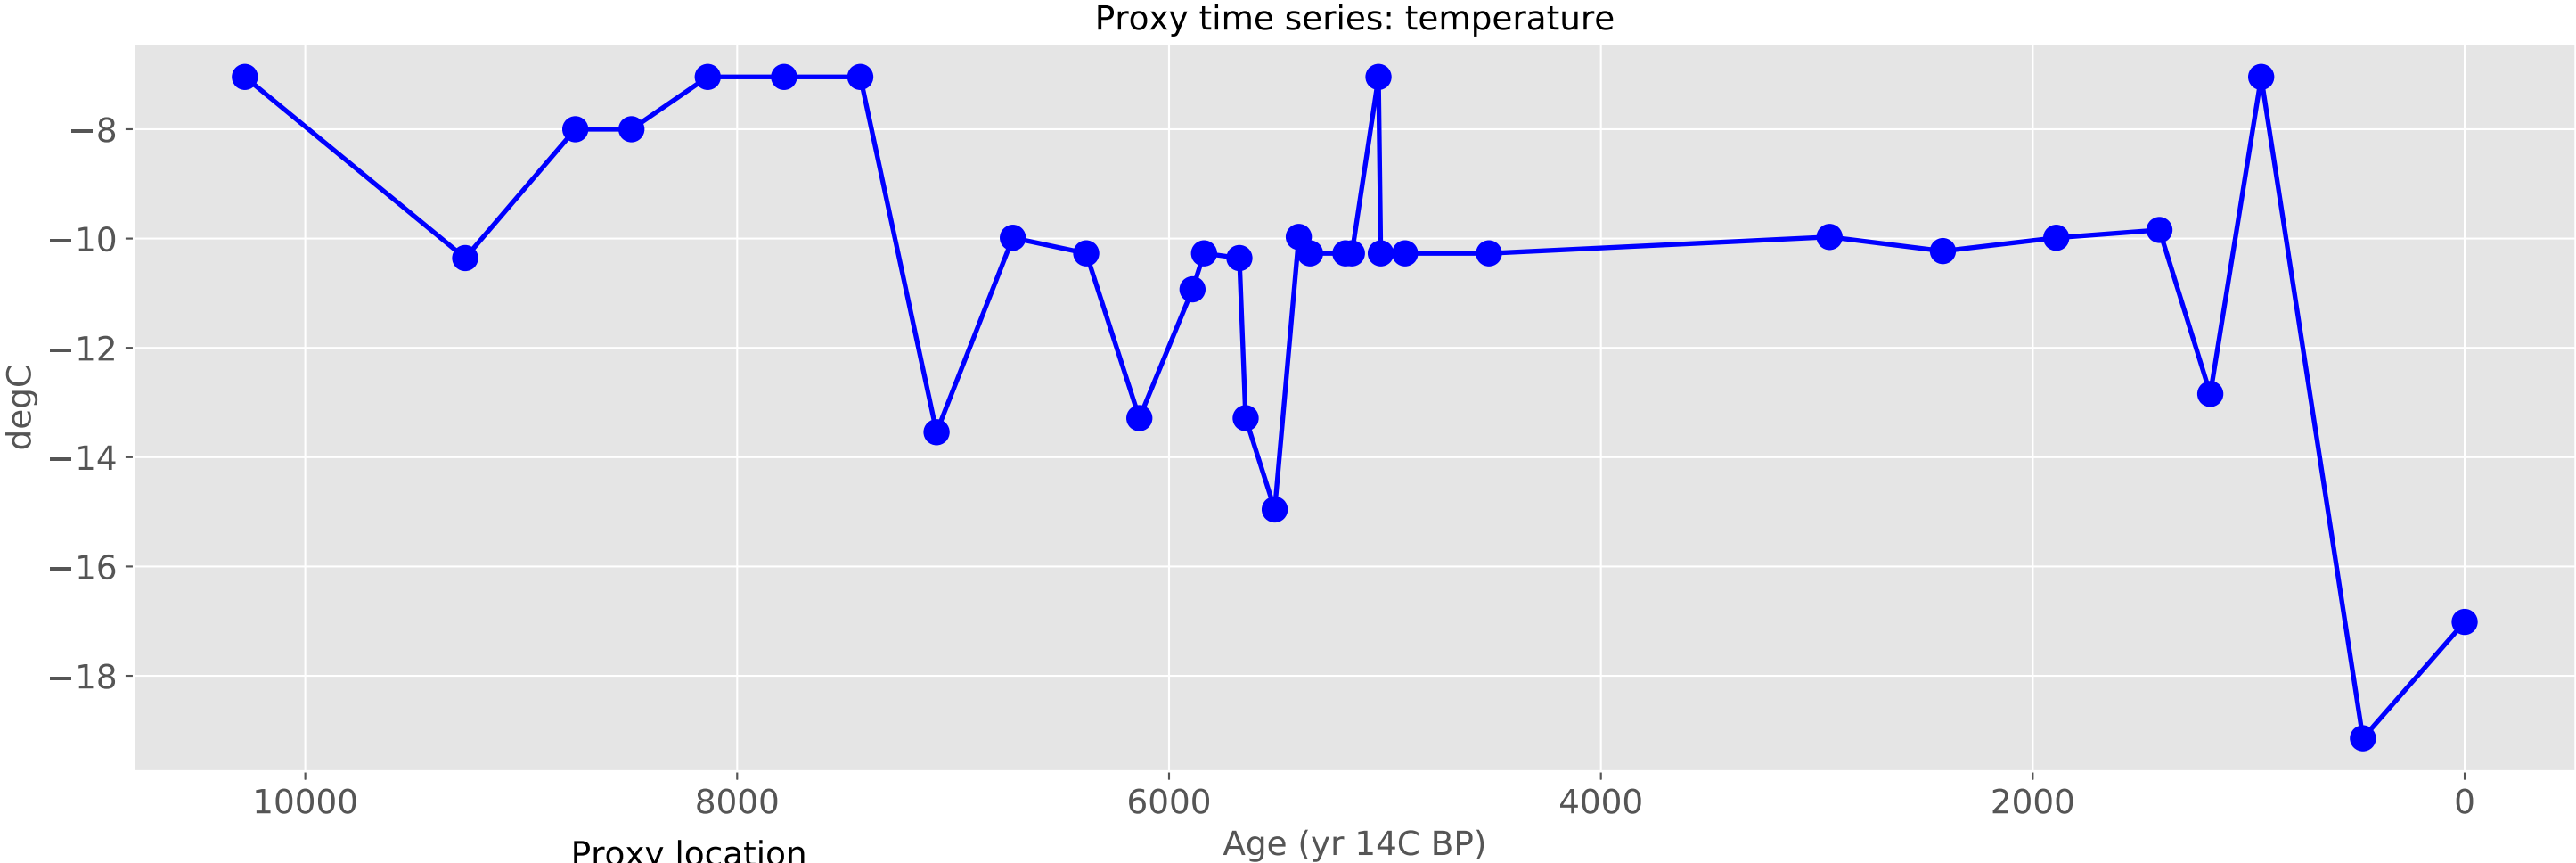

Proxy location  
(68.38 ° N, 138.38 ° W)



|                    |                                                                                              |
|--------------------|----------------------------------------------------------------------------------------------|
| Dataset name:      | Hanging.Cwynar.1982                                                                          |
| Archive type:      | LakeSediment                                                                                 |
| Proxy type:        | pollen                                                                                       |
| Variable name:     | temperature                                                                                  |
| Latitude ( ° N):   | 68.38                                                                                        |
| Longitude ( ° E):  | -138.38                                                                                      |
| Elevation (m):     | 500.0                                                                                        |
| Interp. variable:  | T                                                                                            |
| Interp. detail:    | air@surface                                                                                  |
| Interp. season:    | winter+                                                                                      |
| Interp. direction: | positive                                                                                     |
| Pub. 1 title:      | A Late-Quaternary vegetation history from Hanging ...                                        |
| Pub. 1 authors:    | Cwynar, Les C.                                                                               |
| Pub. 1 year:       | 1982                                                                                         |
| Pub. 1 DOI:        | 10.2307/2937342                                                                              |
| Original data URL: | <a href="http://www.ncdc.noaa.gov/paleo/study/27330">www.ncdc.noaa.gov/paleo/study/27330</a> |

Proxy data and metadata  
LakeSediment | pollen | MLake.Ritchie.1977 | M2L1es9v20zP

Proxy time series: temperature

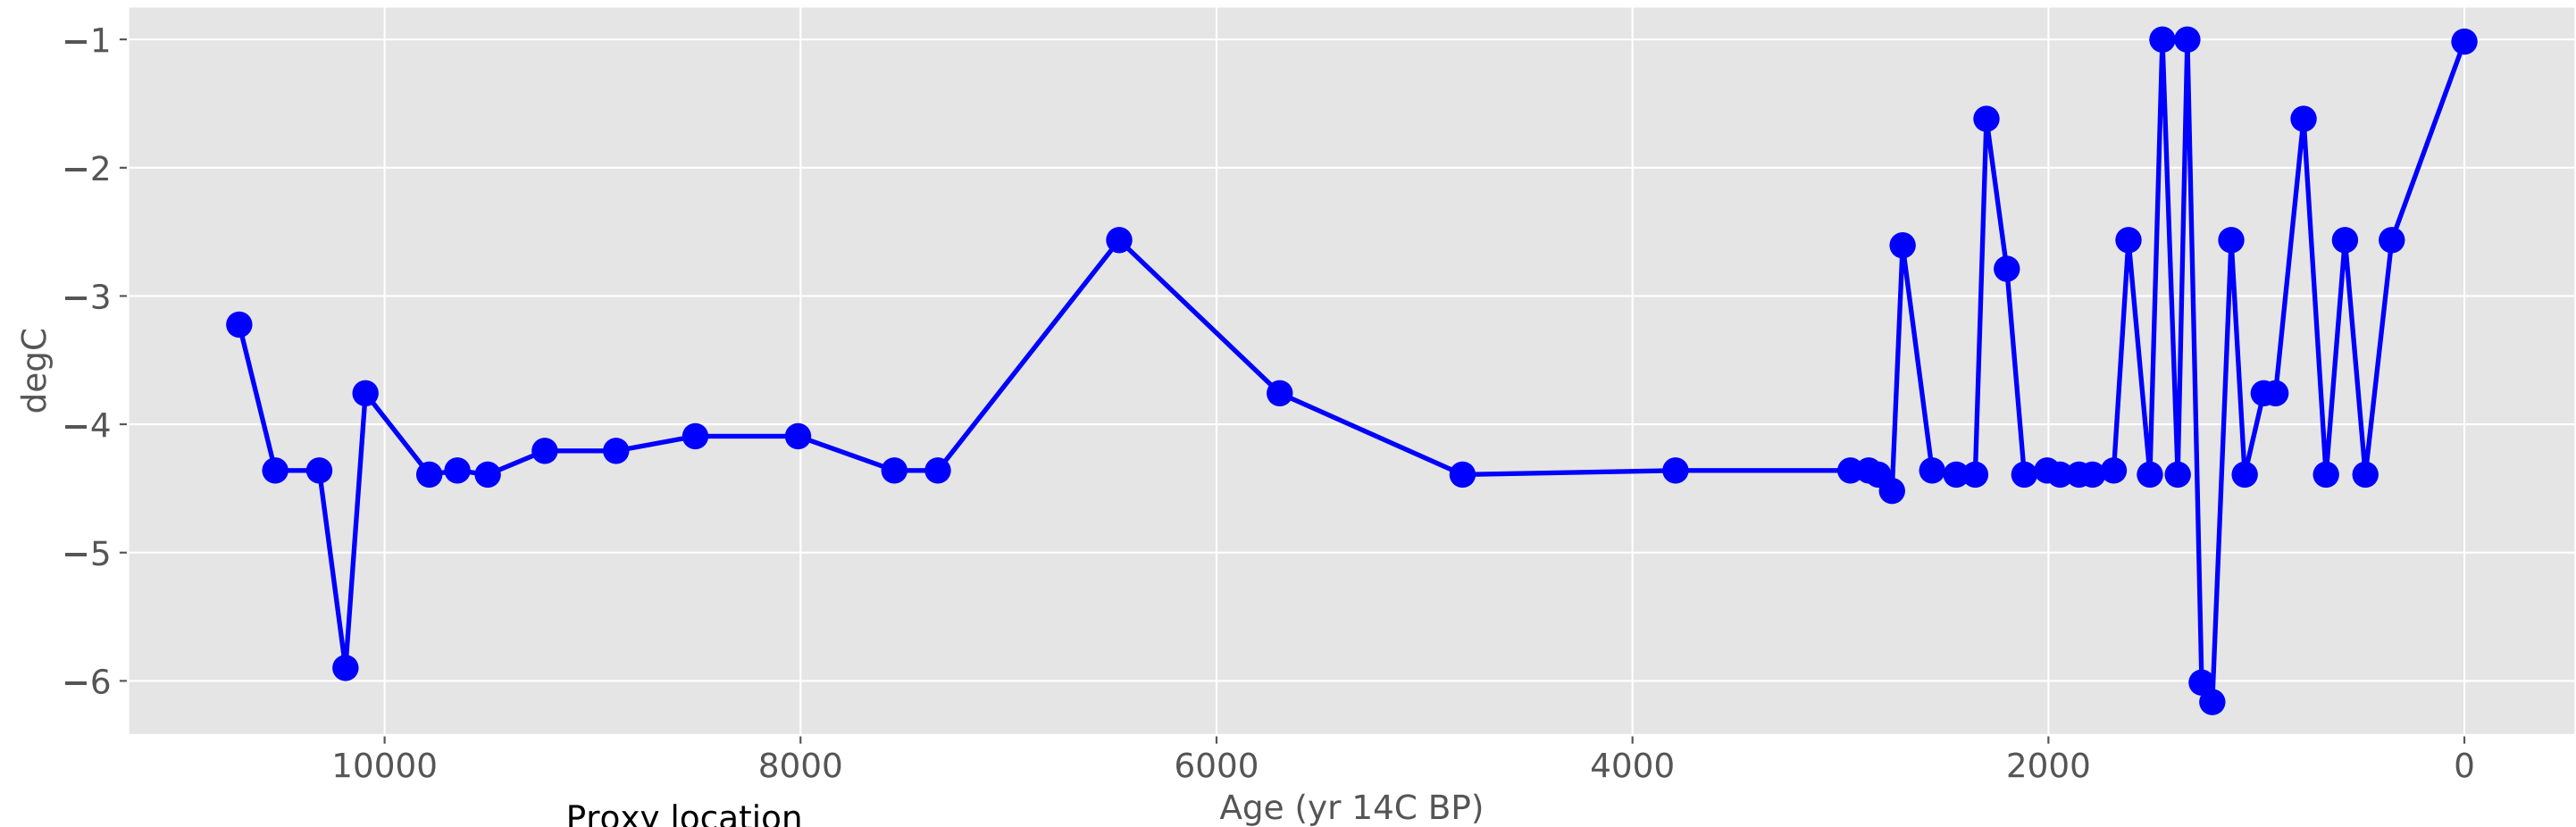

Proxy location  
(68.27 ° N, 133.47 ° W)

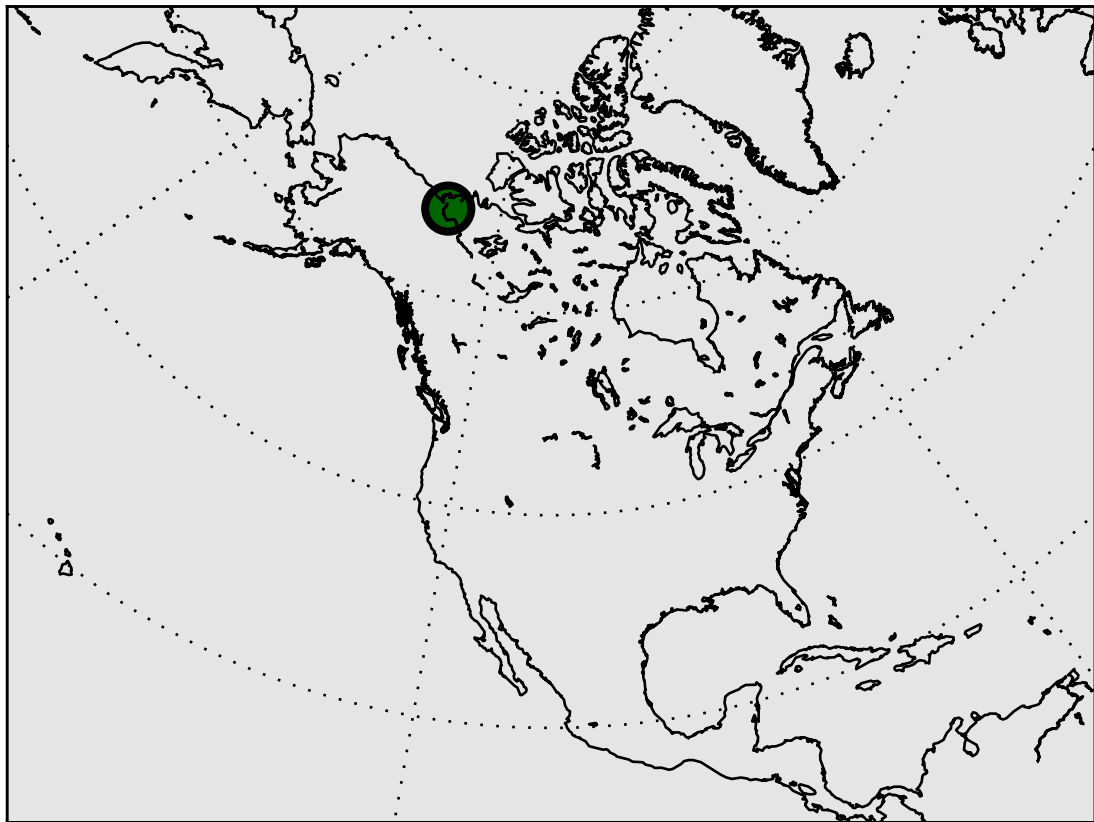

|                    |                                                                                              |
|--------------------|----------------------------------------------------------------------------------------------|
| Dataset name:      | MLake.Ritchie.1977                                                                           |
| Archive type:      | LakeSediment                                                                                 |
| Proxy type:        | pollen                                                                                       |
| Variable name:     | temperature                                                                                  |
| Latitude ( ° N):   | 68.27                                                                                        |
| Longitude ( ° E):  | -133.47                                                                                      |
| Elevation (m):     | 105.0                                                                                        |
| Interp. variable:  | T                                                                                            |
| Interp. detail:    | air@surface                                                                                  |
| Interp. season:    | annual                                                                                       |
| Interp. direction: | positive                                                                                     |
| Pub. 1 title:      | The Modern and Late Quaternary vegetation of the C...                                        |
| Pub. 1 authors:    | Ritchie, J. C.                                                                               |
| Pub. 1 year:       | 1977                                                                                         |
| Pub. 1 DOI:        | 10.2307/1942175                                                                              |
| Original data URL: | <a href="http://www.ncdc.noaa.gov/paleo/study/27330">www.ncdc.noaa.gov/paleo/study/27330</a> |



Proxy data and metadata

LakeSediment | pollen | MLake.Ritchie.1977 | M2L4g91g0giP

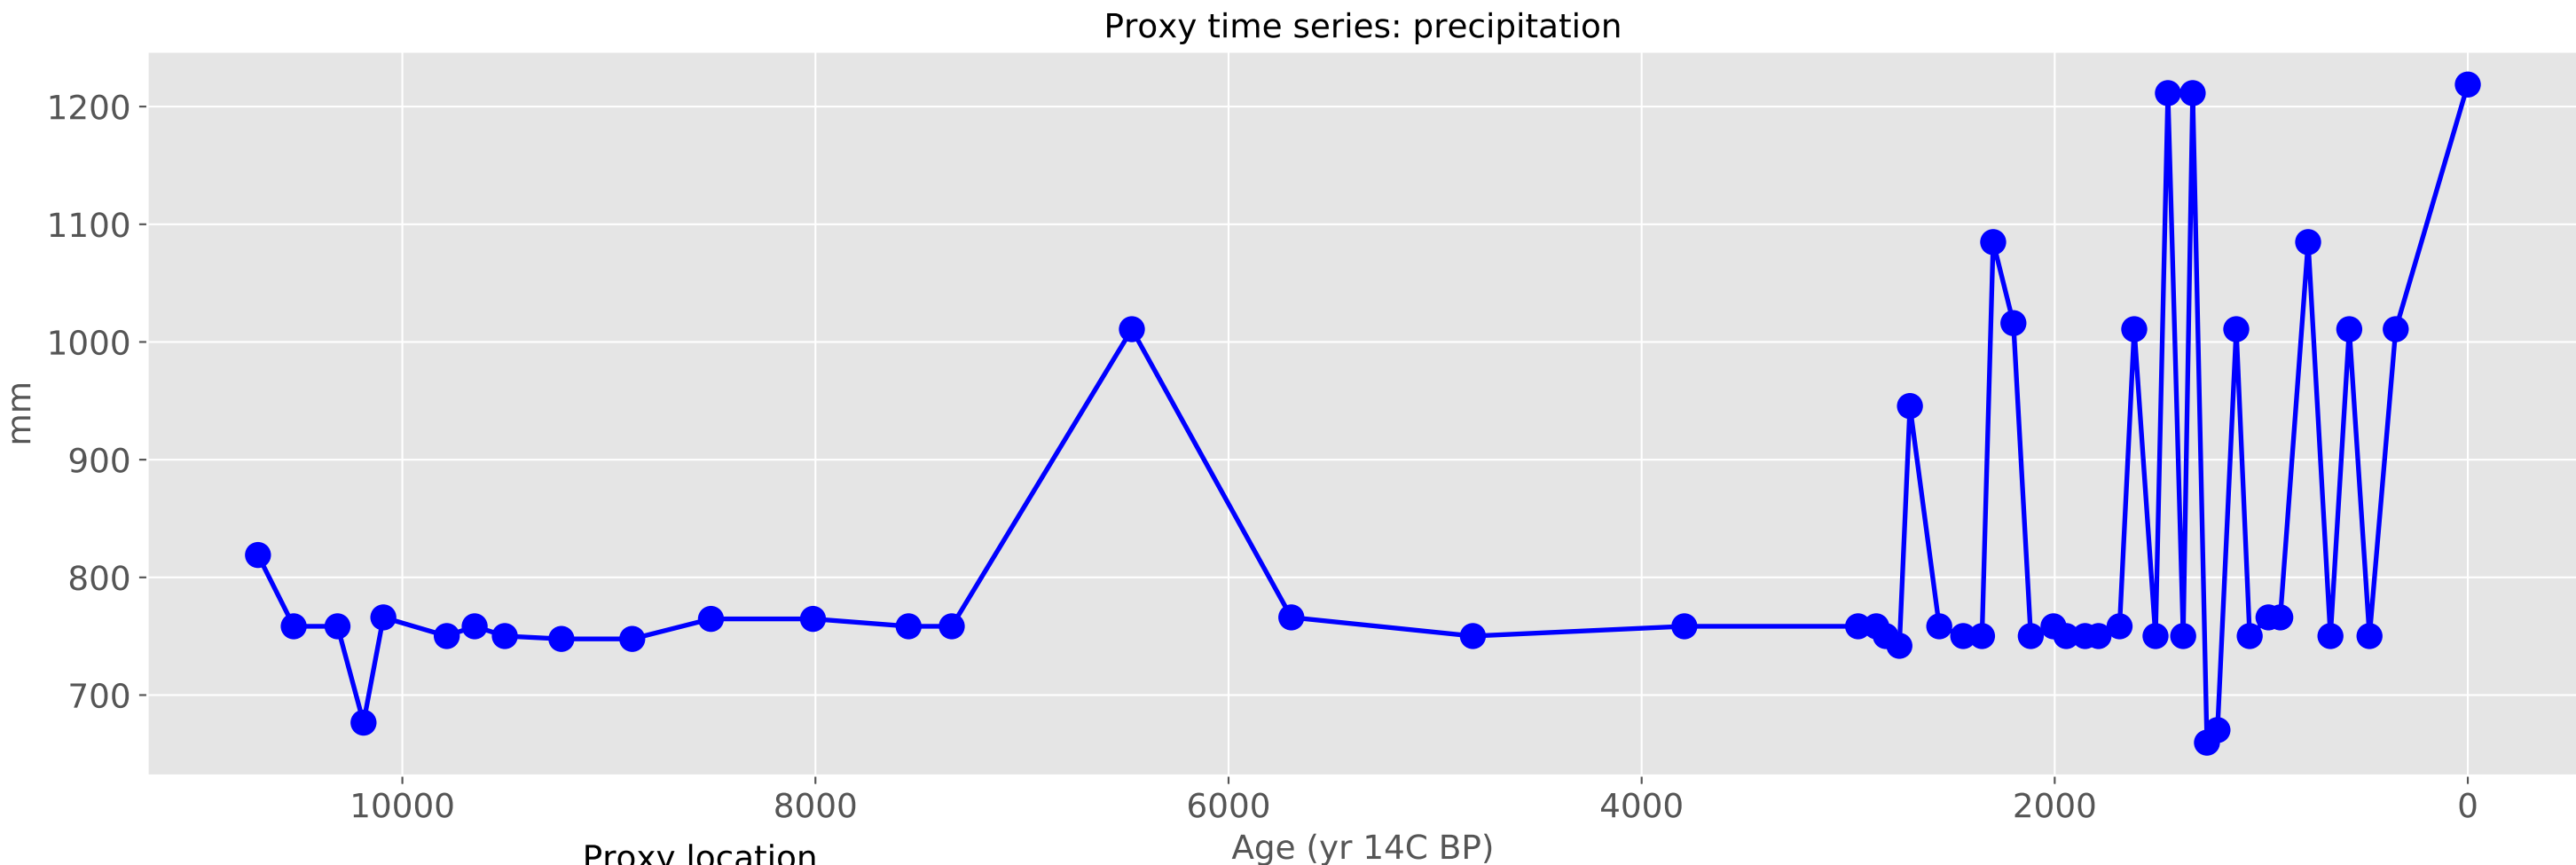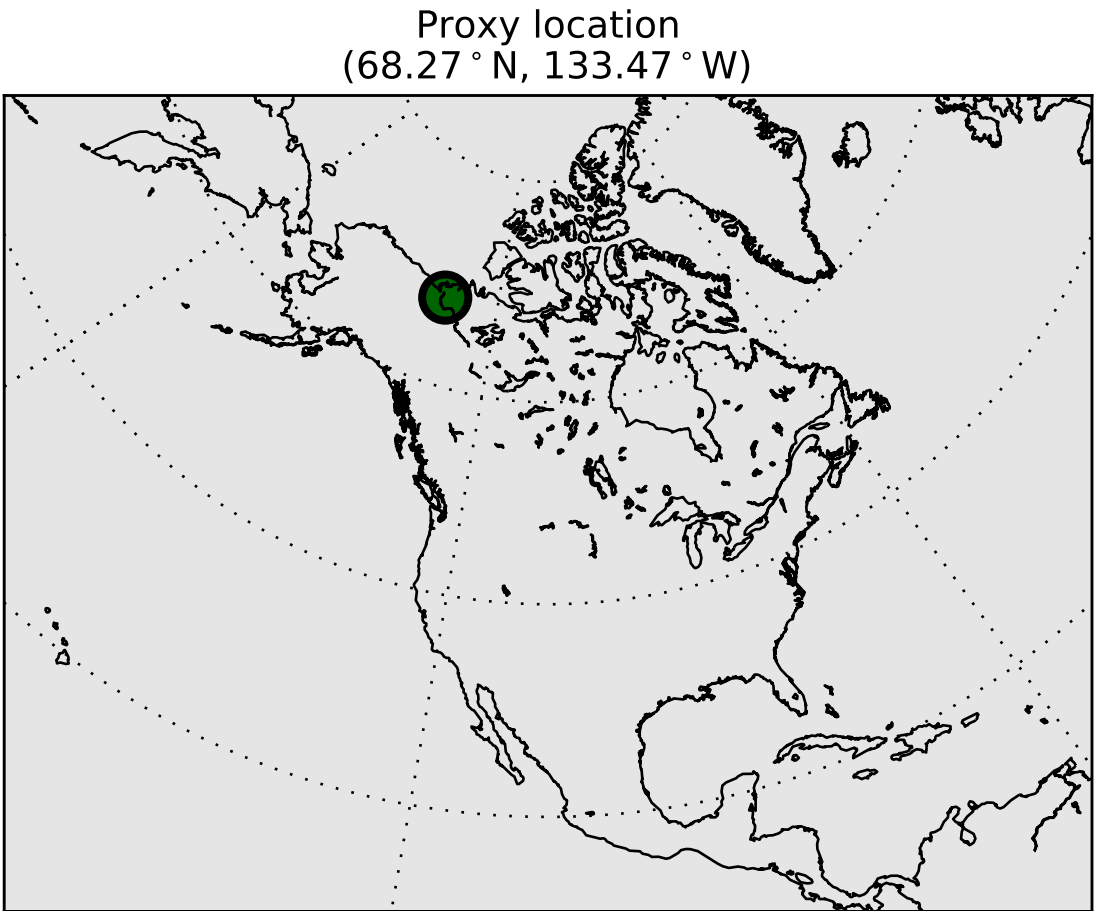

|                    |                                                       |
|--------------------|-------------------------------------------------------|
| Dataset name:      | MLake.Ritchie.1977                                    |
| Archive type:      | LakeSediment                                          |
| Proxy type:        | pollen                                                |
| Variable name:     | precipitation                                         |
| Latitude ( ° N):   | 68.27                                                 |
| Longitude ( ° E):  | -133.47                                               |
| Elevation (m):     | 105.0                                                 |
| Interp. variable:  | P                                                     |
| Interp. detail:    | amount@surface                                        |
| Interp. season:    | annual                                                |
| Interp. direction: | positive                                              |
| Pub. 1 title:      | The Modern and Late Quaternary vegetation of the C... |
| Pub. 1 authors:    | Ritchie, J. C.                                        |
| Pub. 1 year:       | 1977                                                  |
| Pub. 1 DOI:        | 10.2307/1942175                                       |
| Original data URL: | www.ncdc.noaa.gov/paleo/study/27330                   |

Proxy data and metadata  
LakeSediment | pollen | MLake.Ritchie.1977 | M2Lbyxlfr07P

Proxy time series: temperature

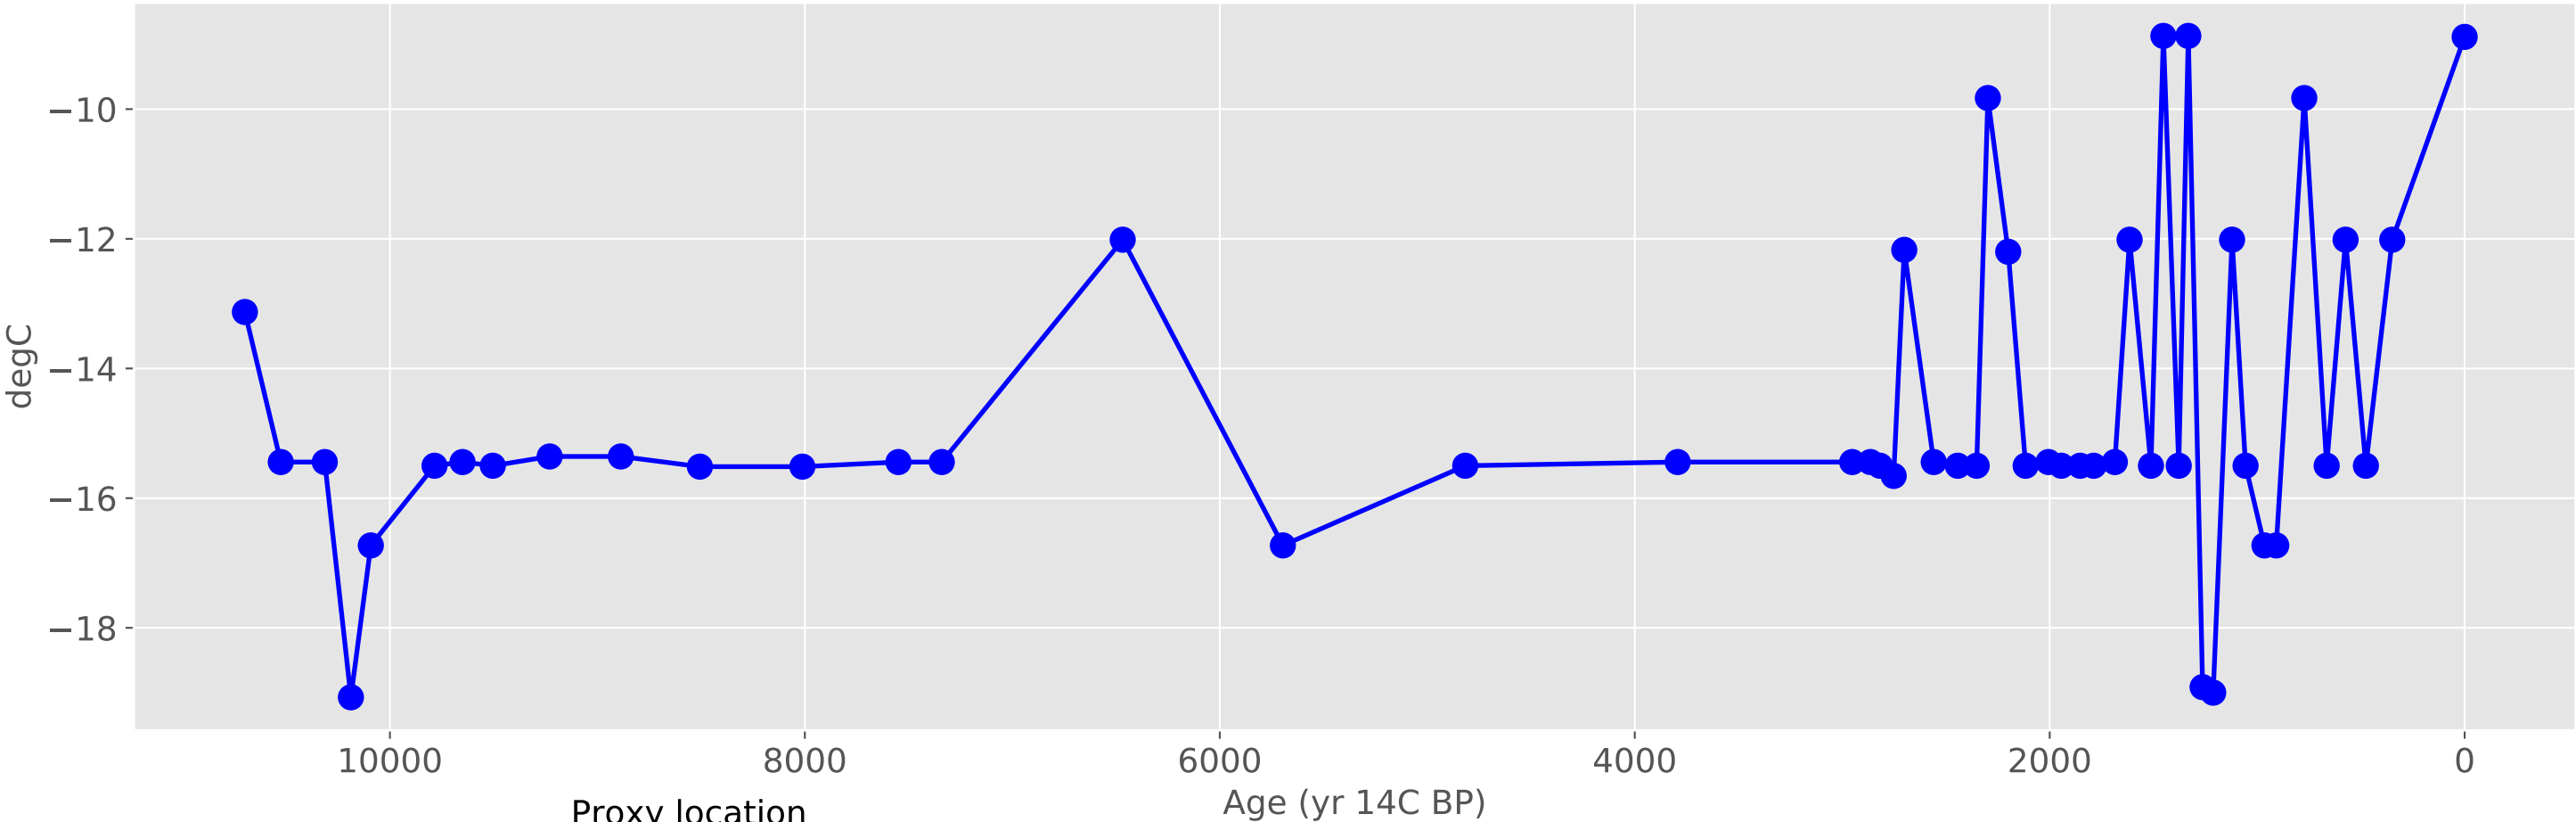

Proxy location  
(68.27 ° N, 133.47 ° W)

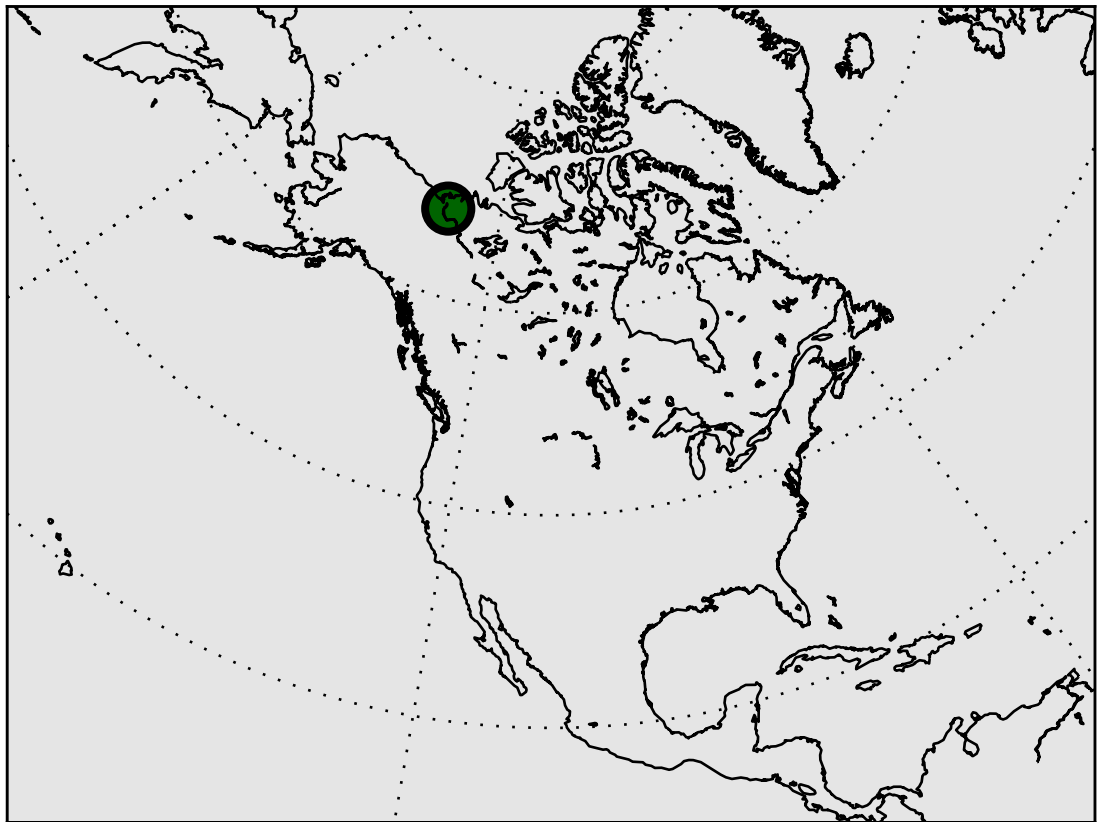

|                    |                                                                                              |
|--------------------|----------------------------------------------------------------------------------------------|
| Dataset name:      | MLake.Ritchie.1977                                                                           |
| Archive type:      | LakeSediment                                                                                 |
| Proxy type:        | pollen                                                                                       |
| Variable name:     | temperature                                                                                  |
| Latitude ( ° N):   | 68.27                                                                                        |
| Longitude ( ° E):  | -133.47                                                                                      |
| Elevation (m):     | 105.0                                                                                        |
| Interp. variable:  | T                                                                                            |
| Interp. detail:    | air@surface                                                                                  |
| Interp. season:    | winter+                                                                                      |
| Interp. direction: | positive                                                                                     |
| Pub. 1 title:      | The Modern and Late Quaternary vegetation of the C...                                        |
| Pub. 1 authors:    | Ritchie, J. C.                                                                               |
| Pub. 1 year:       | 1977                                                                                         |
| Pub. 1 DOI:        | 10.2307/1942175                                                                              |
| Original data URL: | <a href="http://www.ncdc.noaa.gov/paleo/study/27330">www.ncdc.noaa.gov/paleo/study/27330</a> |

Proxy data and metadata  
LakeSediment | pollen | MLake.Ritchie.1977 | M2LwpcxxempP

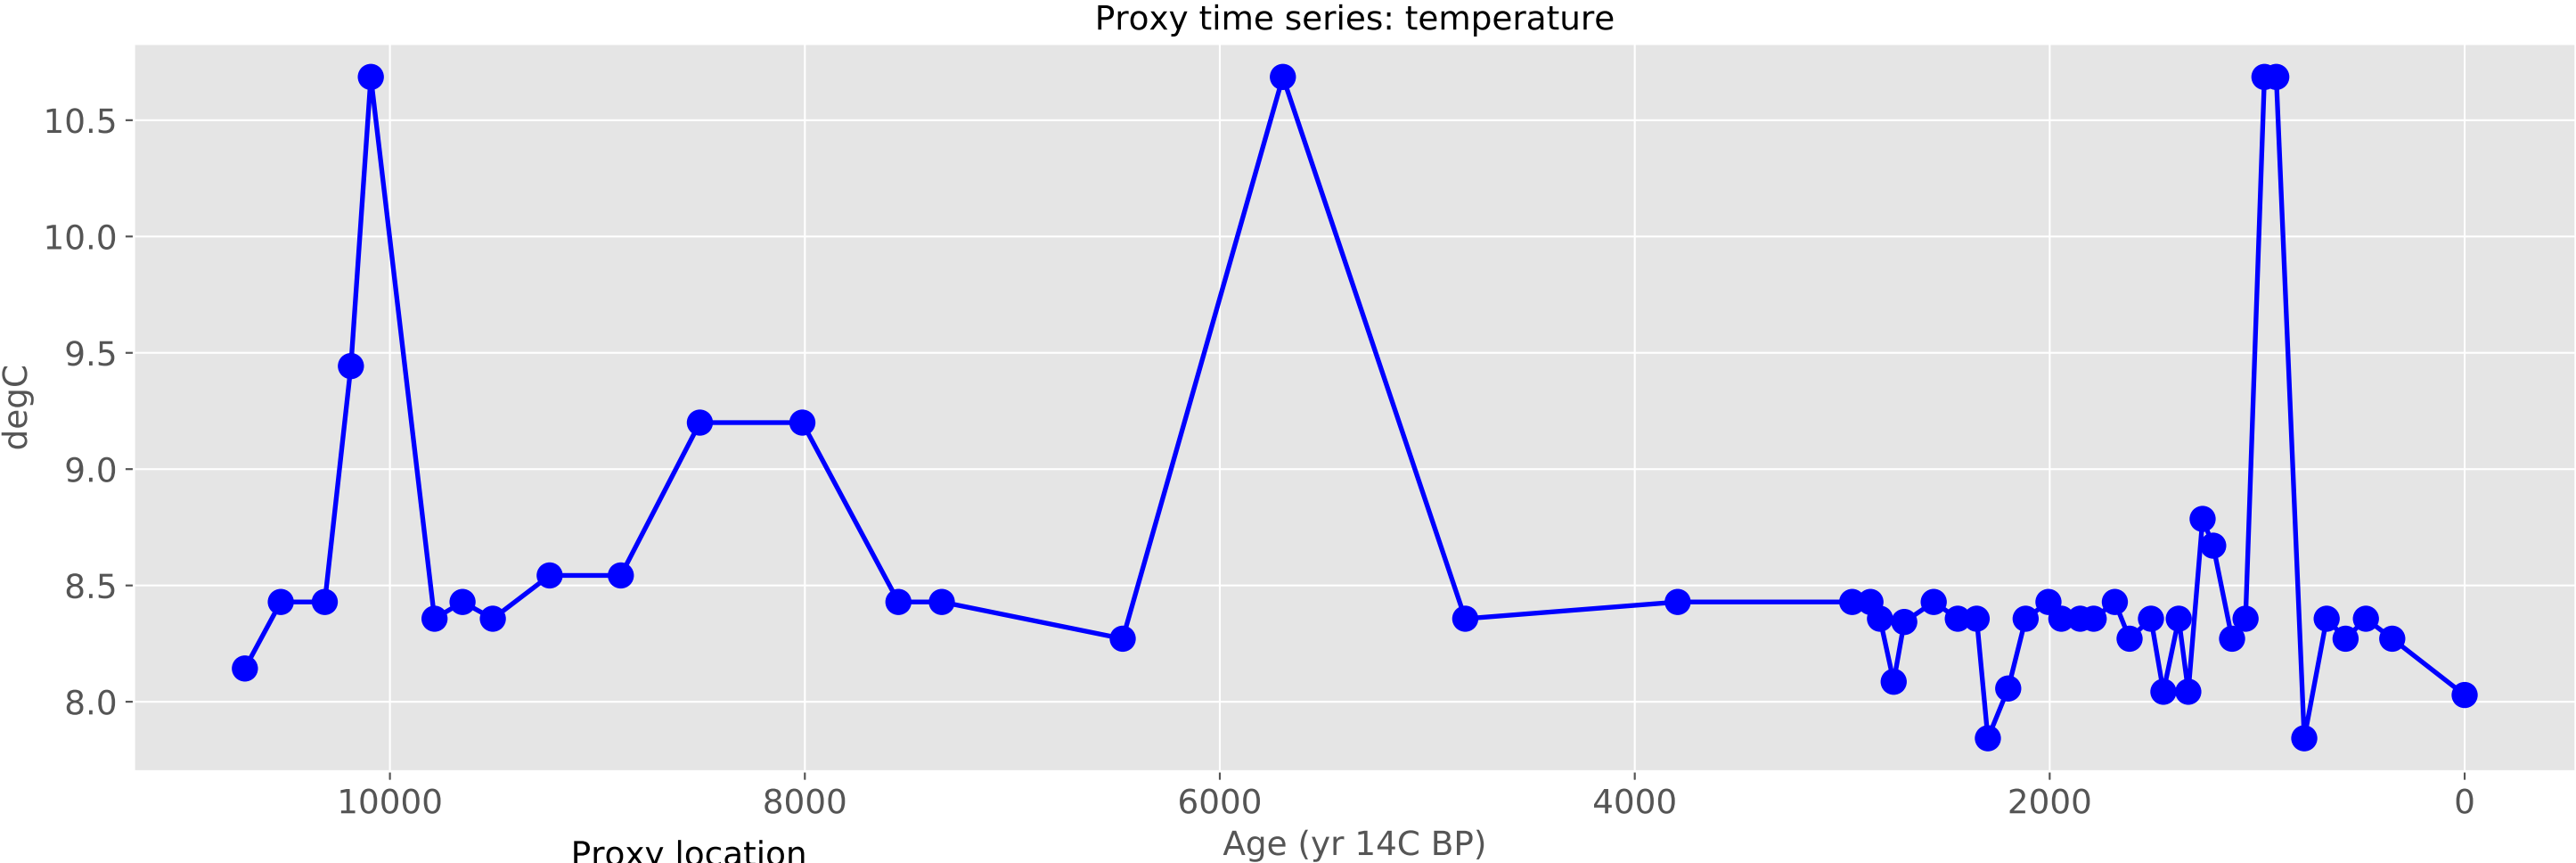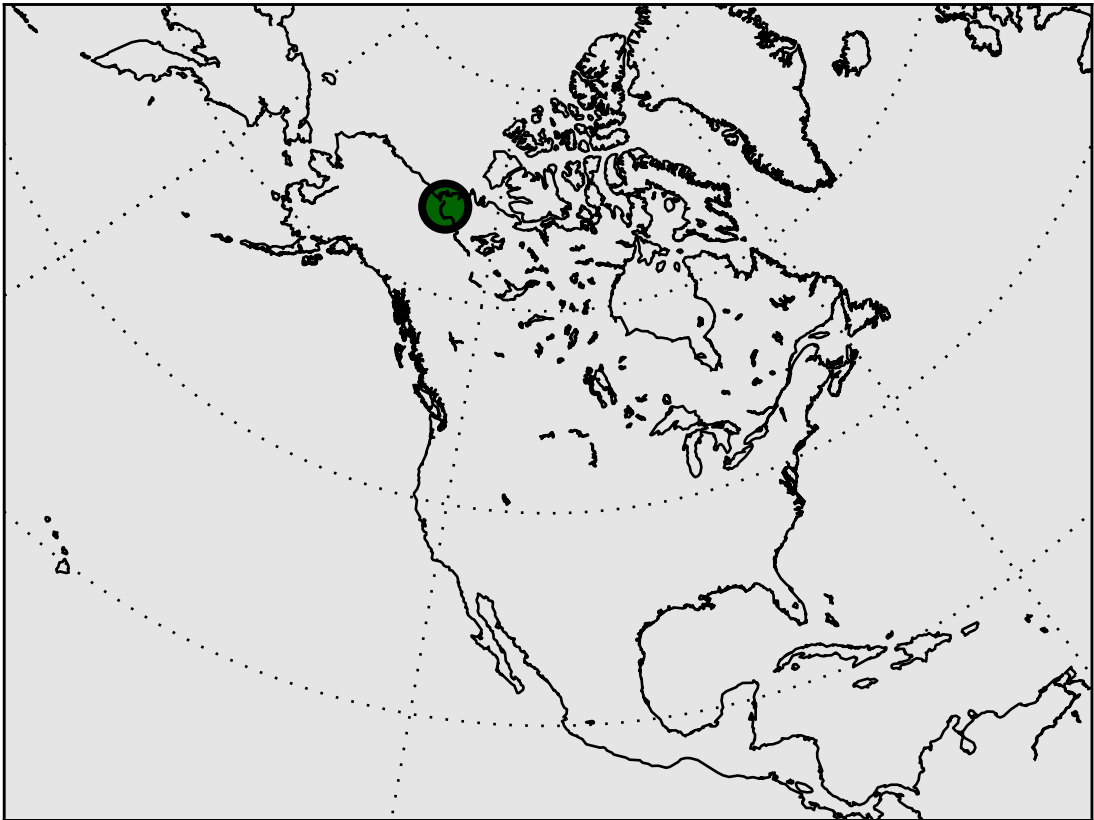

|                    |                                                       |
|--------------------|-------------------------------------------------------|
| Dataset name:      | MLake.Ritchie.1977                                    |
| Archive type:      | LakeSediment                                          |
| Proxy type:        | pollen                                                |
| Variable name:     | temperature                                           |
| Latitude ( ° N):   | 68.27                                                 |
| Longitude ( ° E):  | -133.47                                               |
| Elevation (m):     | 105.0                                                 |
| Interp. variable:  | T                                                     |
| Interp. detail:    | air@surface                                           |
| Interp. season:    | summer+                                               |
| Interp. direction: | positive                                              |
| Pub. 1 title:      | The Modern and Late Quaternary vegetation of the C... |
| Pub. 1 authors:    | Ritchie, J. C.                                        |
| Pub. 1 year:       | 1977                                                  |
| Pub. 1 DOI:        | 10.2307/1942175                                       |
| Original data URL: | www.ncdc.noaa.gov/paleo/study/27330                   |

Proxy data and metadata  
LakeSediment | pollen | Ranger.Brubaker.1983 | PYT909ZJ7SN

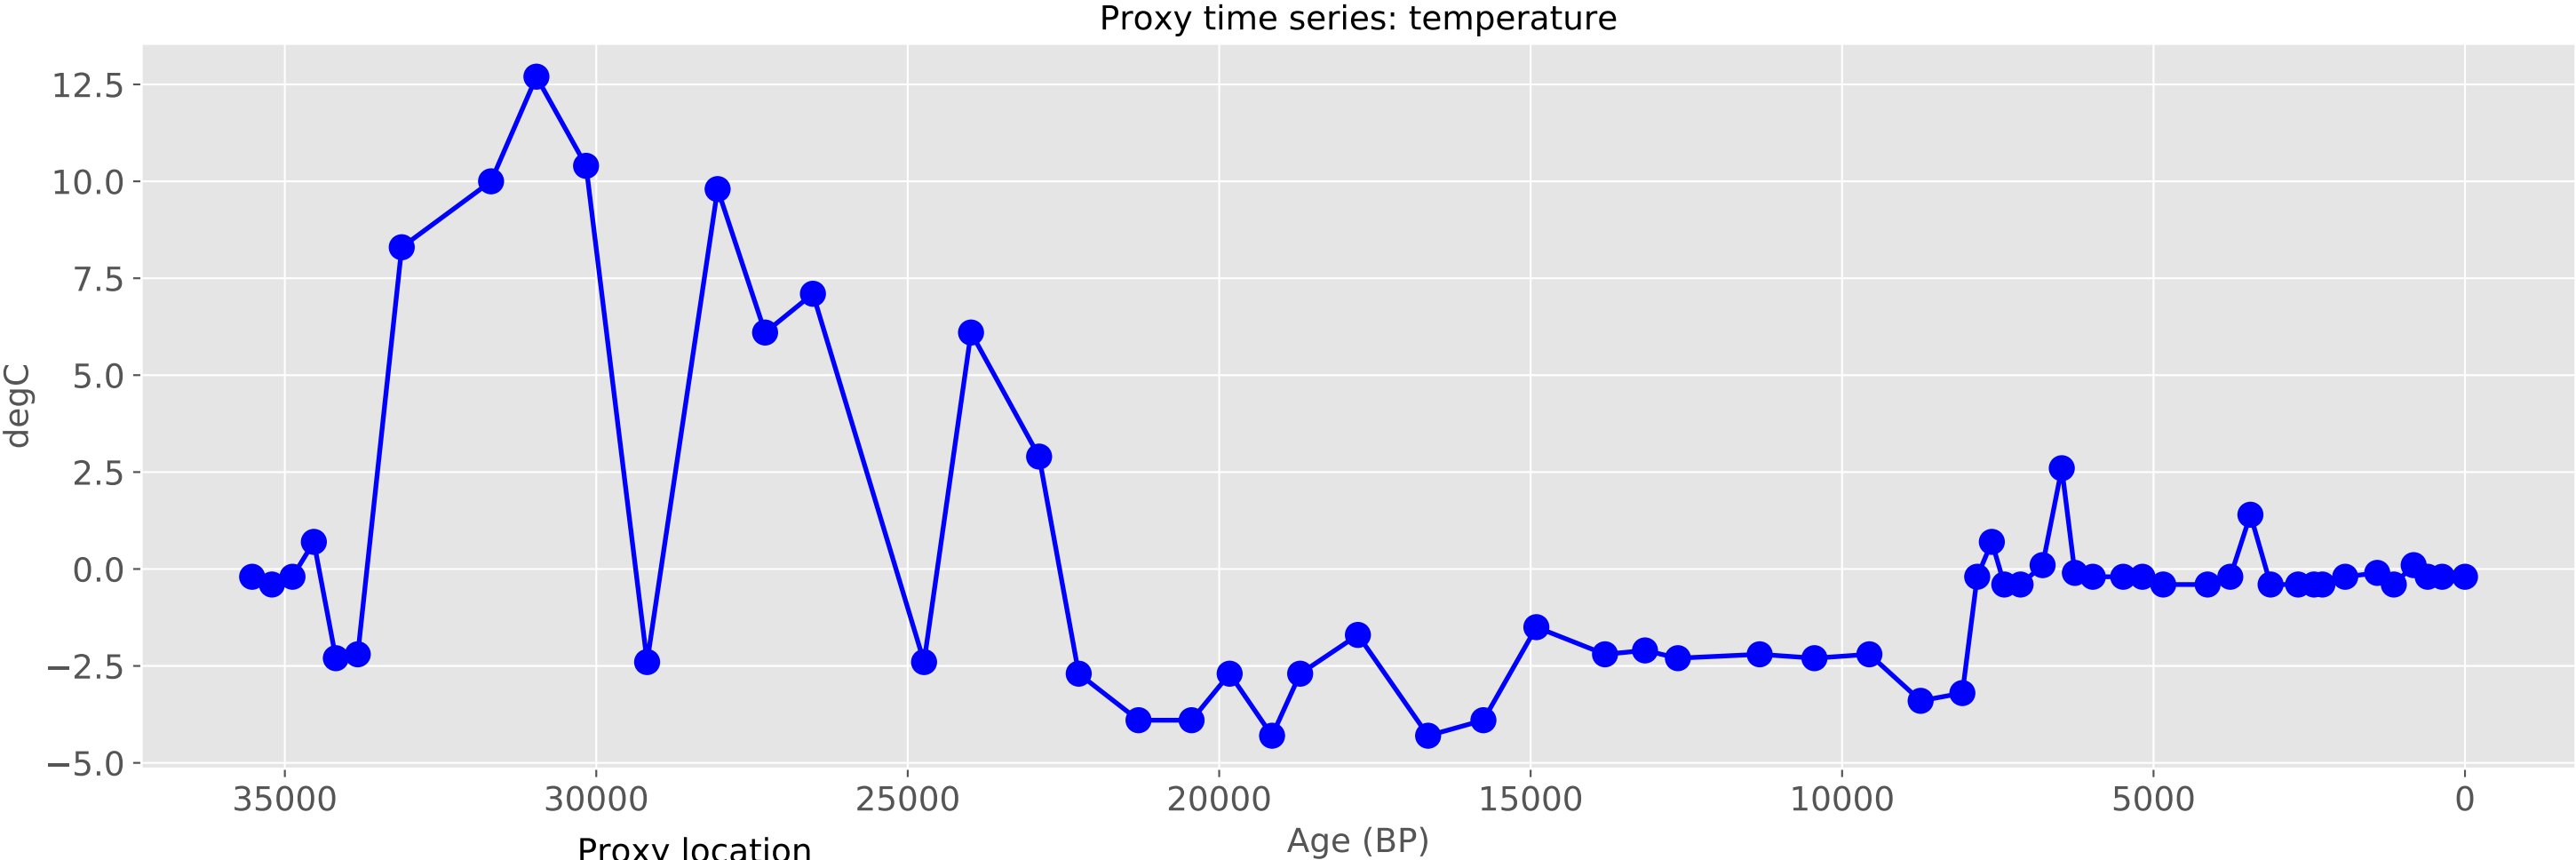

Proxy location  
(67.15 ° N, 153.65 ° W)

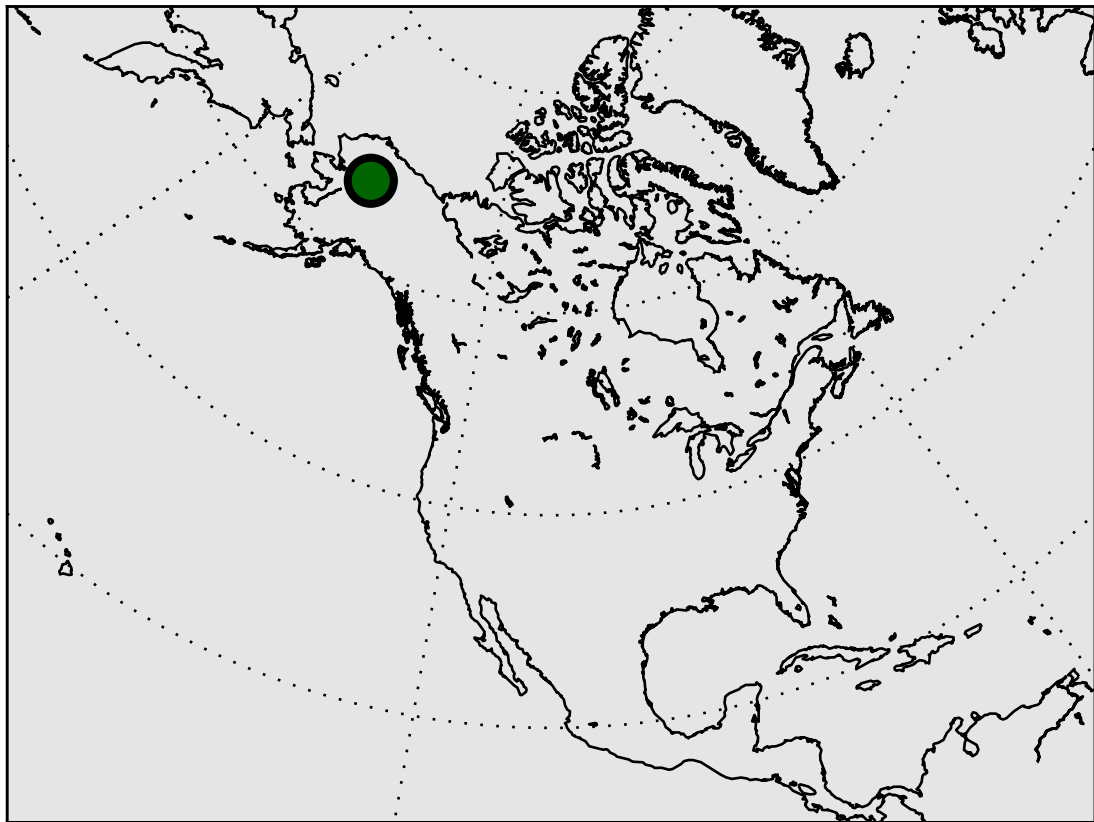

|                    |                                                       |
|--------------------|-------------------------------------------------------|
| Dataset name:      | Ranger.Brubaker.1983                                  |
| Archive type:      | LakeSediment                                          |
| Proxy type:        | pollen                                                |
| Variable name:     | temperature                                           |
| Latitude ( ° N):   | 67.15                                                 |
| Longitude ( ° E):  | -153.65                                               |
| Elevation (m):     | 820.0                                                 |
| Interp. variable:  | T                                                     |
| Interp. detail:    | air@surface                                           |
| Interp. season:    | winter+                                               |
| Interp. direction: | positive                                              |
| Pub. 1 title:      | A Late Wisconsin and Holocene vegetation history f... |
| Pub. 1 authors:    | Brubaker, Linda B.; Garfinkel, Harriet L.; Edwards... |
| Pub. 1 year:       | 1983                                                  |
| Pub. 1 DOI:        | 10.1016/0033-5894(83)90077-7                          |
| Original data URL: | www.ncdc.noaa.gov/paleo/study/15444                   |

Proxy data and metadata  
LakeSediment | pollen | Ranger.Brubaker.1983 | PYTW8HHSCX2

Proxy time series: temperature

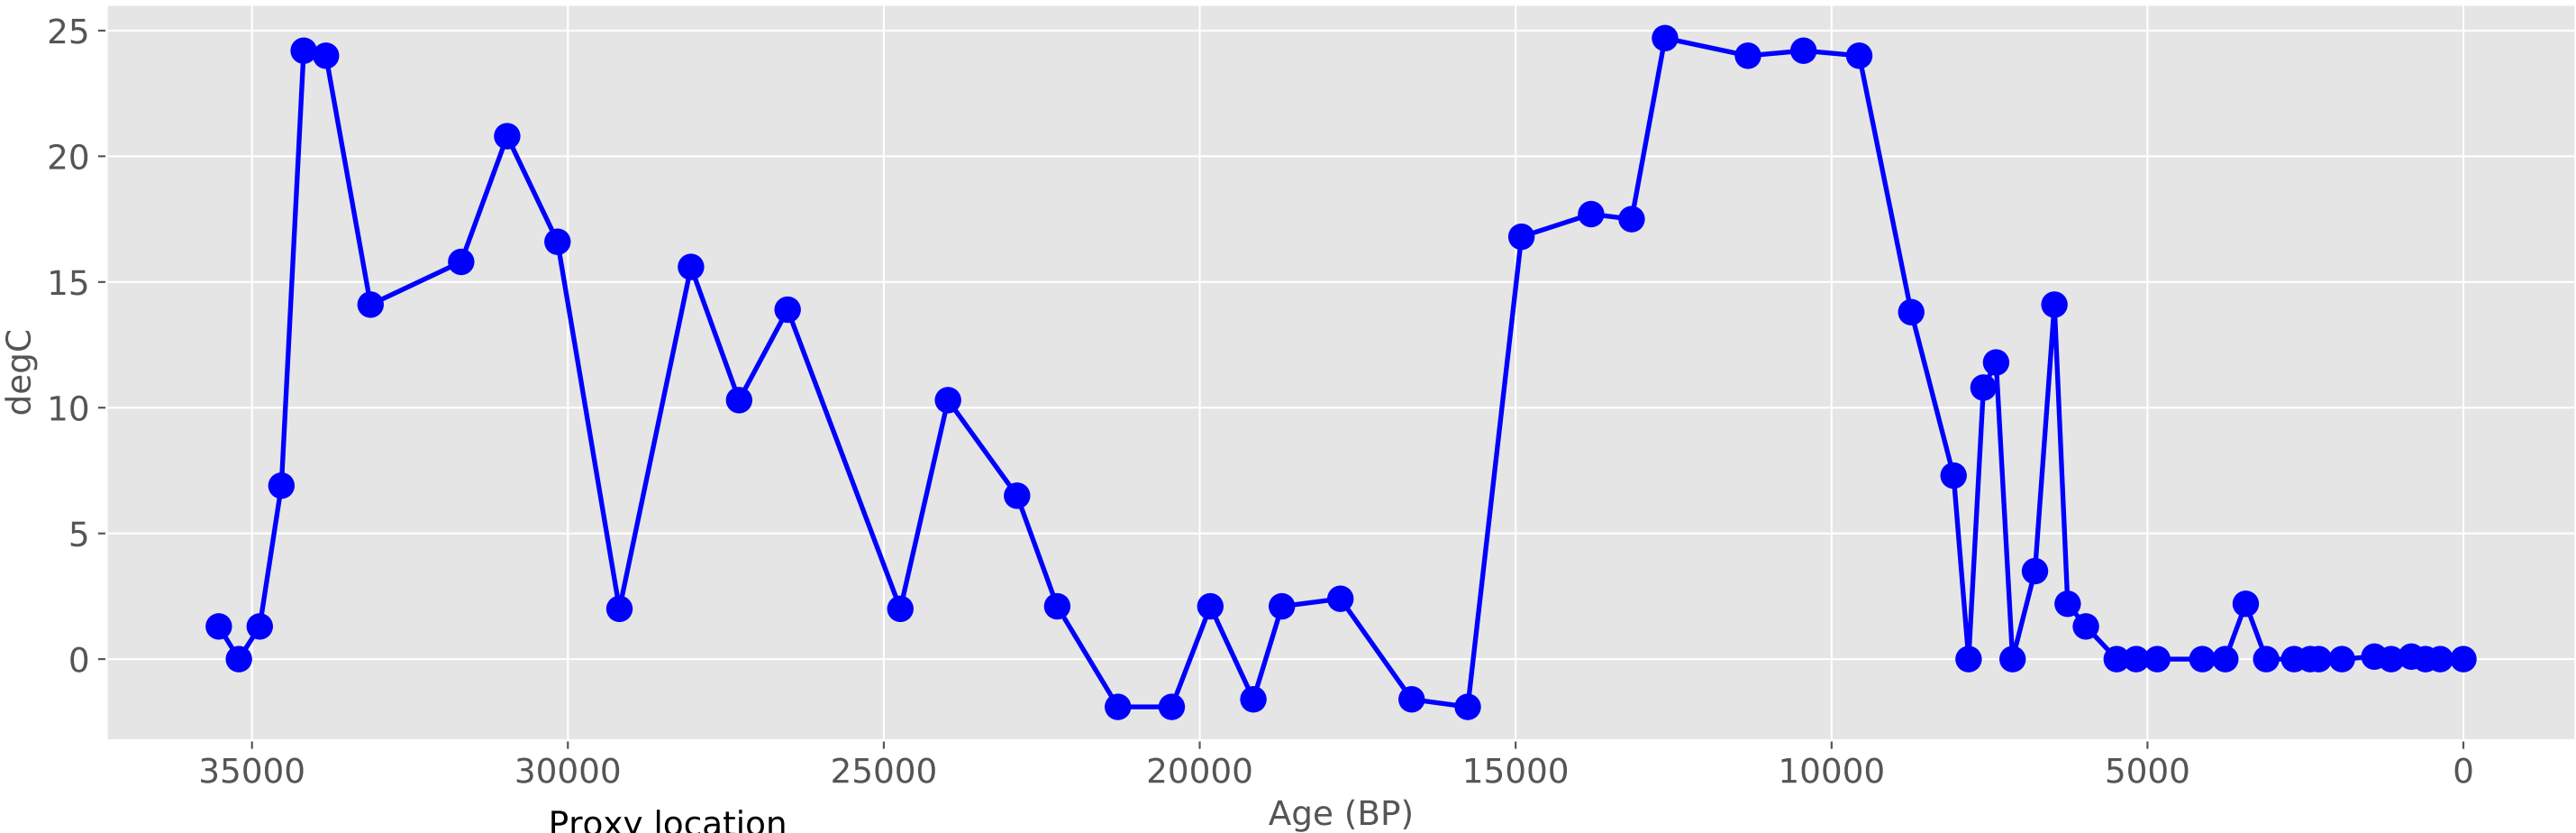

Proxy location  
(67.15 ° N, 153.65 ° W)

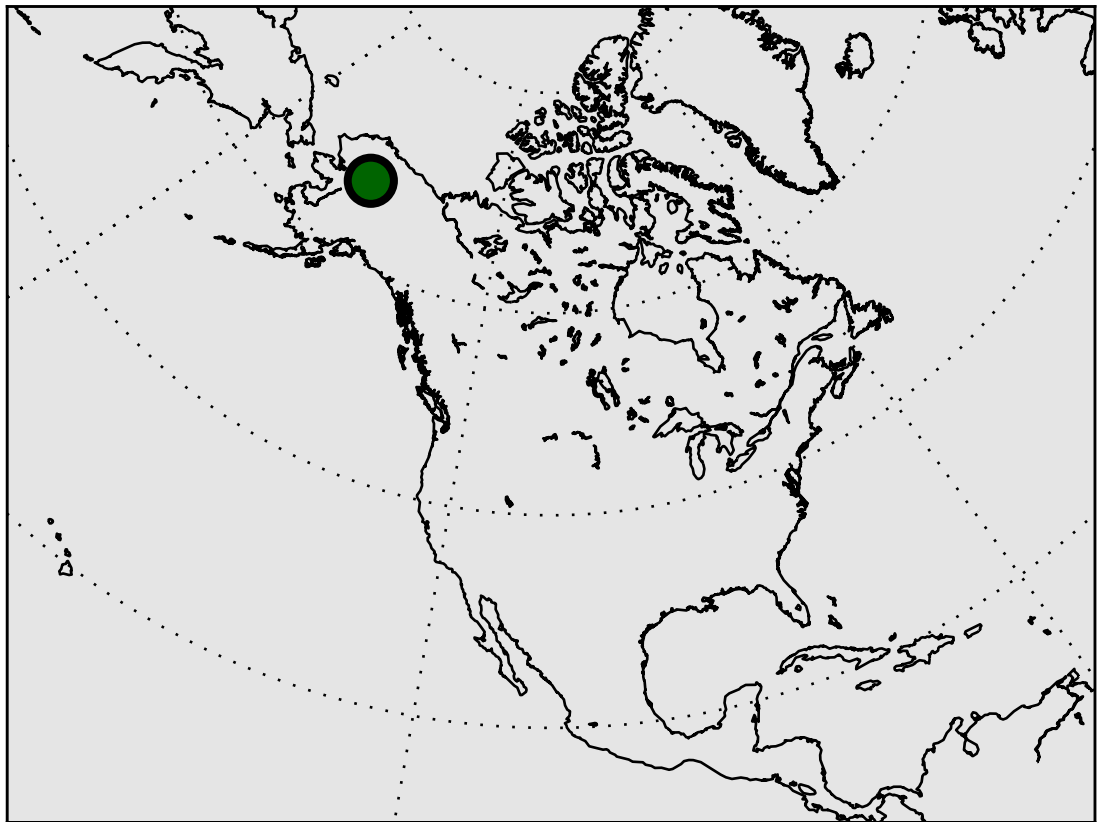

|                    |                                                       |
|--------------------|-------------------------------------------------------|
| Dataset name:      | Ranger.Brubaker.1983                                  |
| Archive type:      | LakeSediment                                          |
| Proxy type:        | pollen                                                |
| Variable name:     | temperature                                           |
| Latitude ( ° N):   | 67.15                                                 |
| Longitude ( ° E):  | -153.65                                               |
| Elevation (m):     | 820.0                                                 |
| Interp. variable:  | T                                                     |
| Interp. detail:    | air@surface                                           |
| Interp. season:    | summer+                                               |
| Interp. direction: | positive                                              |
| Pub. 1 title:      | A Late Wisconsin and Holocene vegetation history f... |
| Pub. 1 authors:    | Brubaker, Linda B.; Garfinkel, Harriet L.; Edwards... |
| Pub. 1 year:       | 1983                                                  |
| Pub. 1 DOI:        | 10.1016/0033-5894(83)90077-7                          |
| Original data URL: | www.ncdc.noaa.gov/paleo/study/15444                   |

Proxy data and metadata

LakeSediment | pollen | Ranger.Brubaker.1983 | RXEc3JaUSUk

Proxy time series: temperatureComposite

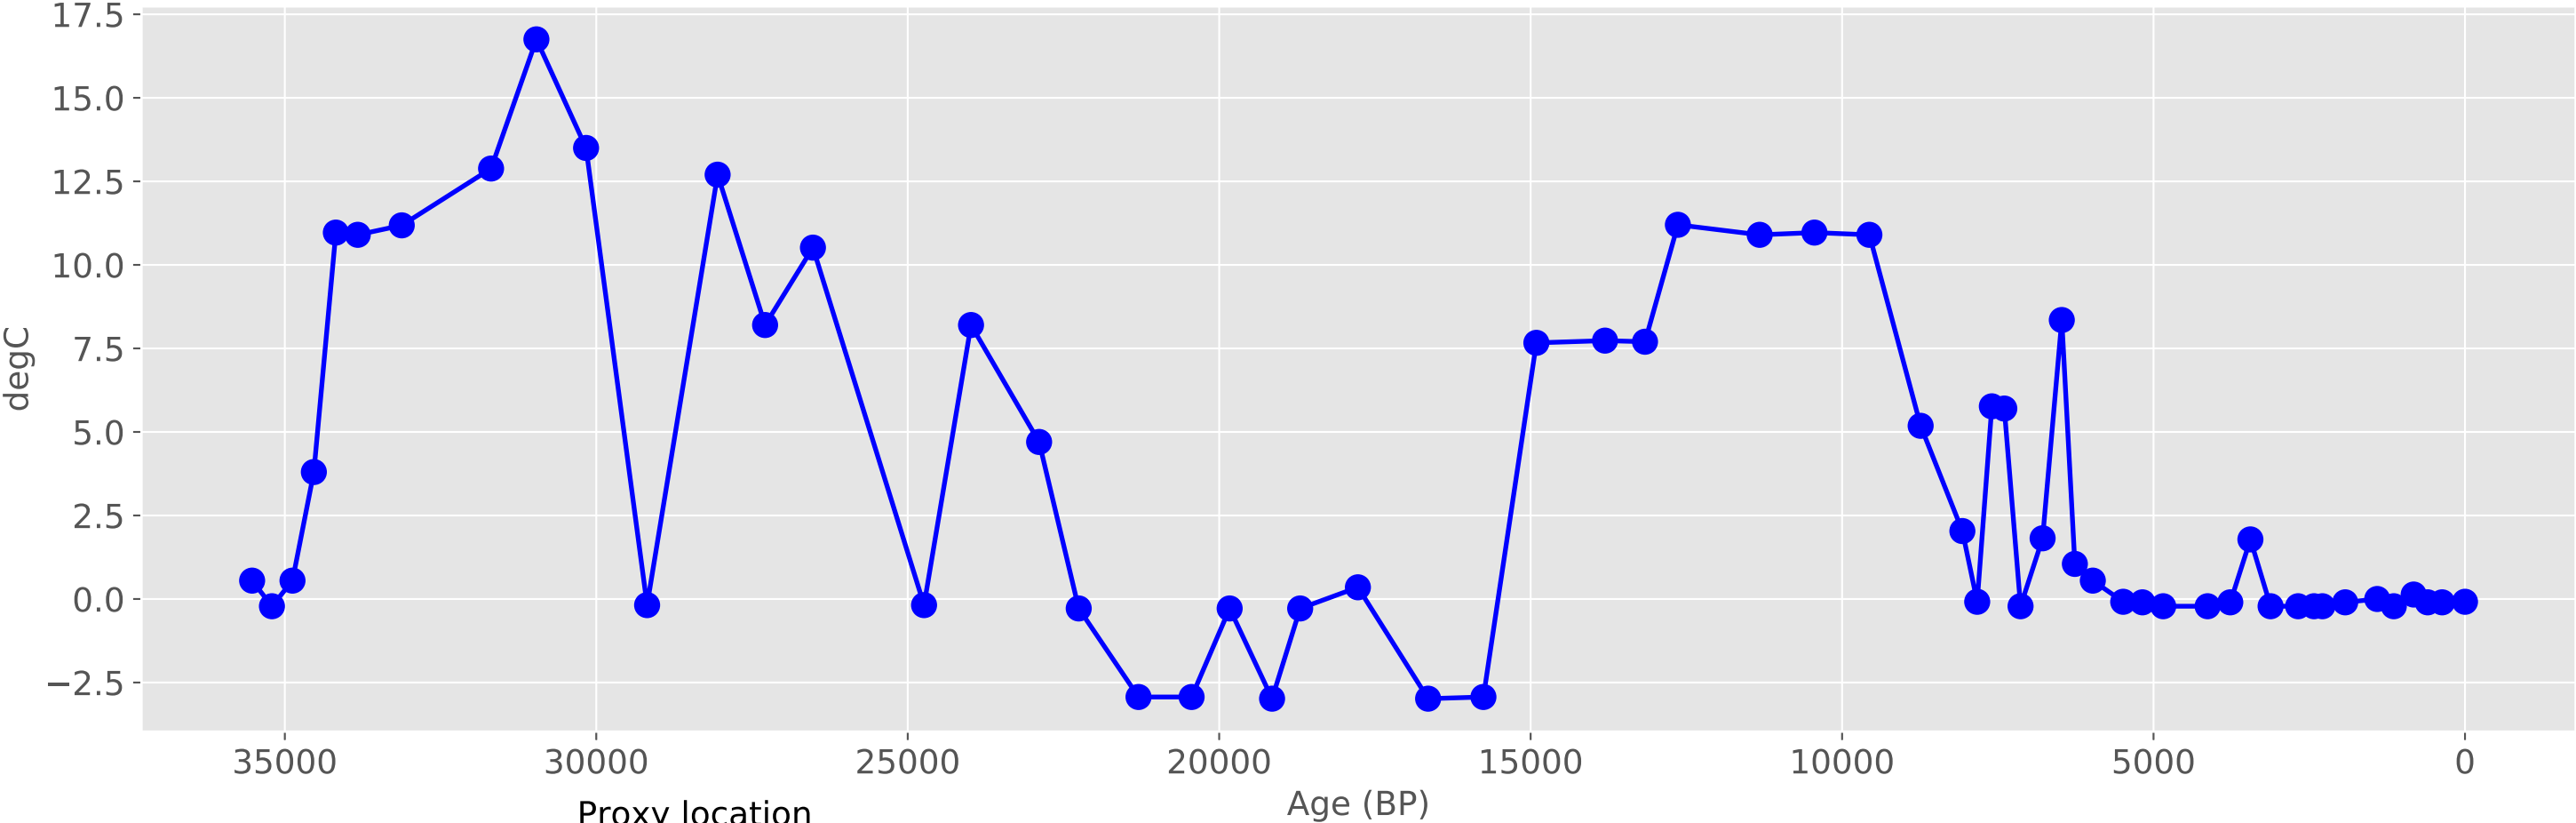

Proxy location  
(67.15 ° N, 153.65 ° W)



|                    |                                                                                              |
|--------------------|----------------------------------------------------------------------------------------------|
| Dataset name:      | Ranger.Brubaker.1983                                                                         |
| Archive type:      | LakeSediment                                                                                 |
| Proxy type:        | pollen                                                                                       |
| Variable name:     | temperatureComposite                                                                         |
| Latitude ( ° N):   | 67.15                                                                                        |
| Longitude ( ° E):  | -153.65                                                                                      |
| Elevation (m):     | 820.0                                                                                        |
| Interp. variable:  | T                                                                                            |
| Interp. detail:    | air@surface                                                                                  |
| Interp. season:    | annual                                                                                       |
| Interp. direction: | positive                                                                                     |
| Pub. 1 title:      | A Late Wisconsin and Holocene vegetation history f...                                        |
| Pub. 1 authors:    | Brubaker, Linda B.; Garfinkel, Harriet L.; Edwards...                                        |
| Pub. 1 year:       | 1983                                                                                         |
| Pub. 1 DOI:        | 10.1016/0033-5894(83)90077-7                                                                 |
| Original data URL: | <a href="http://www.ncdc.noaa.gov/paleo/study/15444">www.ncdc.noaa.gov/paleo/study/15444</a> |



Proxy data and metadata  
**LakeSediment | pollen | LacMeleze.MacDonald.1987 | M2L0p5755rpP**

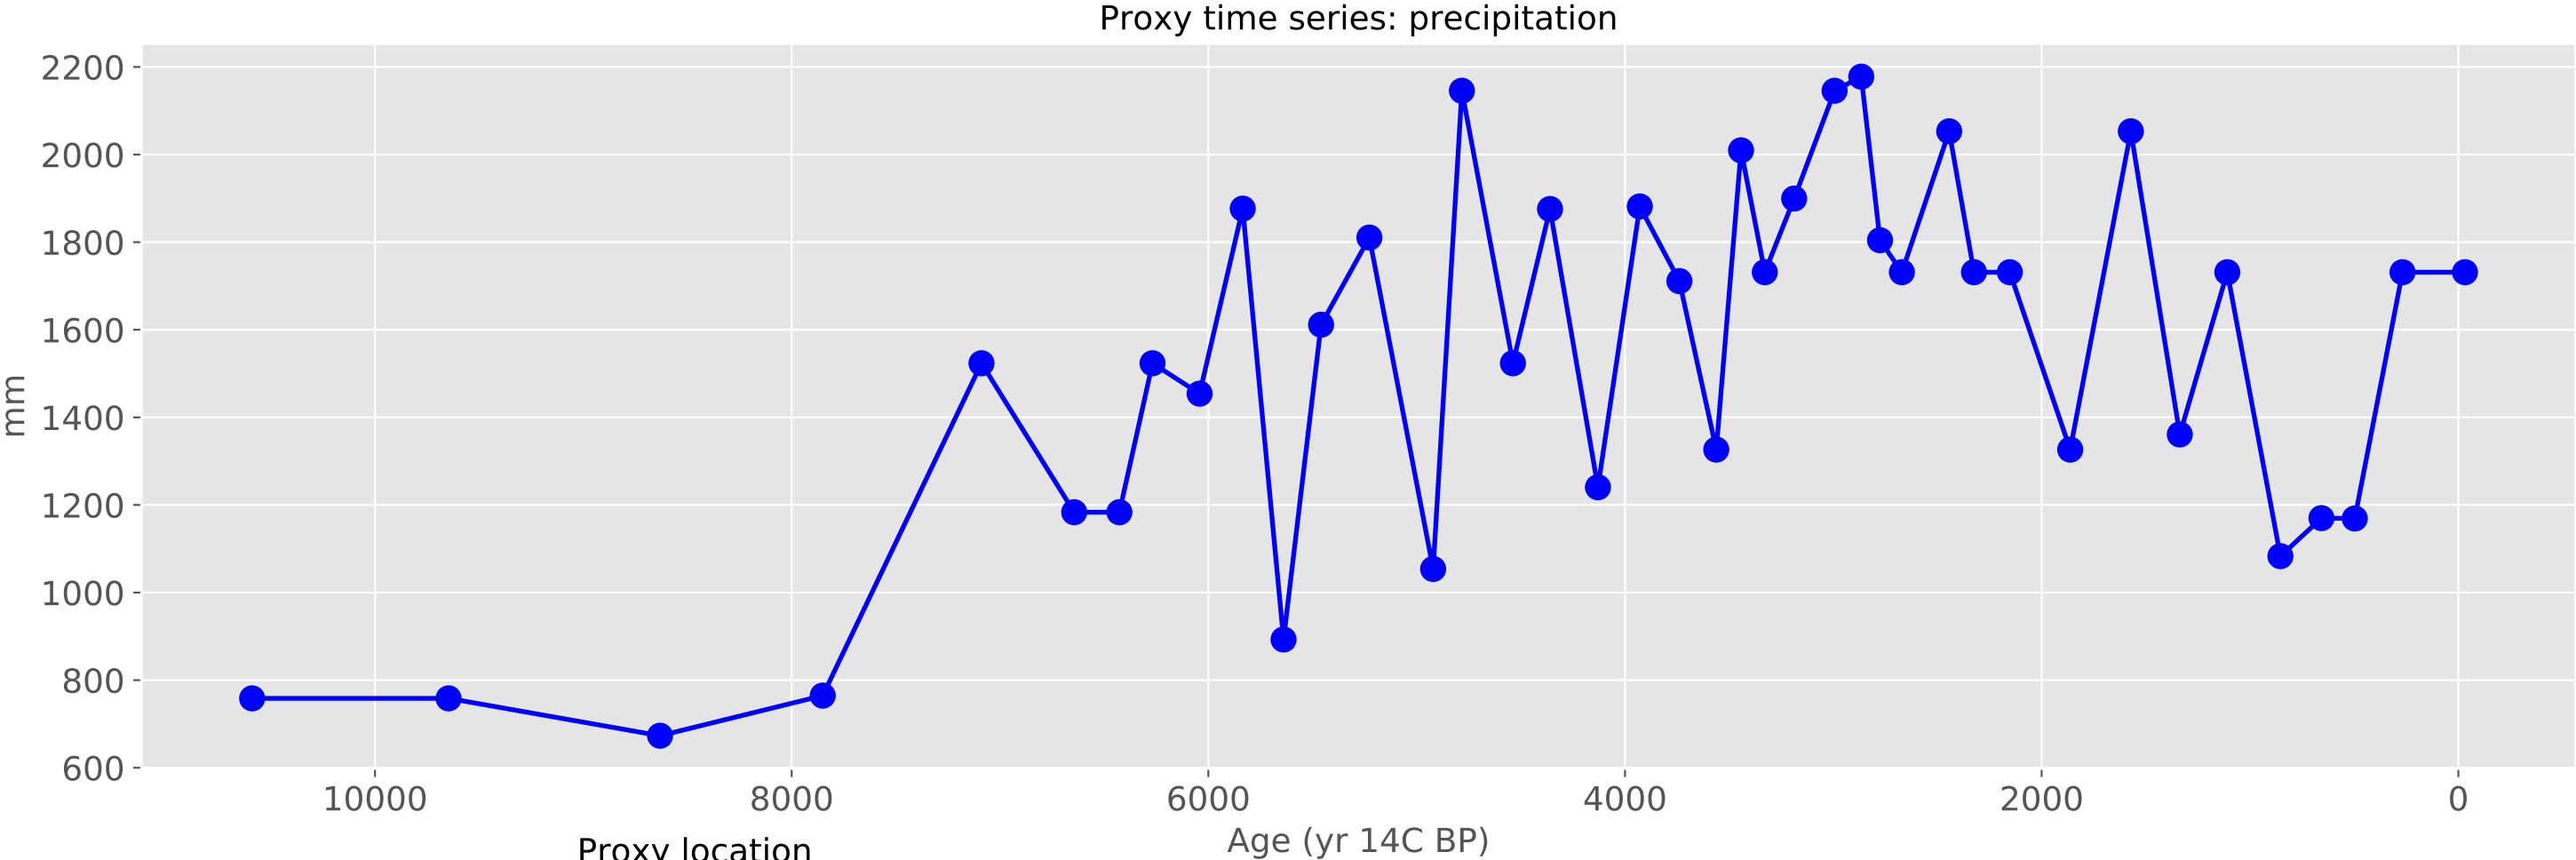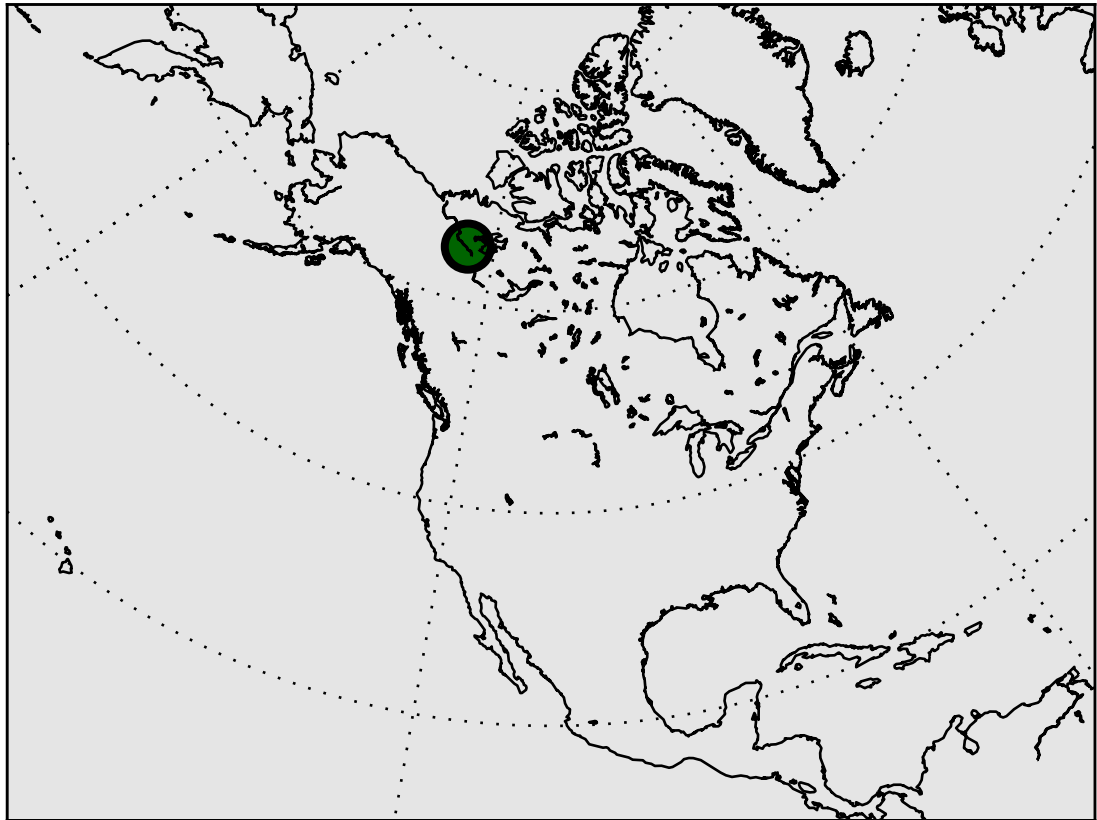

|                    |                                                       |
|--------------------|-------------------------------------------------------|
| Dataset name:      | LacMeleze.MacDonald.1987                              |
| Archive type:      | LakeSediment                                          |
| Proxy type:        | pollen                                                |
| Variable name:     | precipitation                                         |
| Latitude ( ° N):   | 65.22                                                 |
| Longitude ( ° E):  | -126.12                                               |
| Elevation (m):     | 650.0                                                 |
| Interp. variable:  | P                                                     |
| Interp. detail:    | amount@surface                                        |
| Interp. season:    | annual                                                |
| Interp. direction: | positive                                              |
| Pub. 1 title:      | Postglacial vegetation history of the Mackenzie Ri... |
| Pub. 1 authors:    | MacDonald, Glen M.                                    |
| Pub. 1 year:       | 1987                                                  |
| Pub. 1 DOI:        | 10.1016/0033-5894(87)90063-9                          |
| Original data URL: | www.ncdc.noaa.gov/paleo/study/27330                   |

Proxy data and metadata  
LakeSediment | pollen | LacMeleze.MacDonald.1987 | M2L5mytb4knP

Proxy time series: temperature

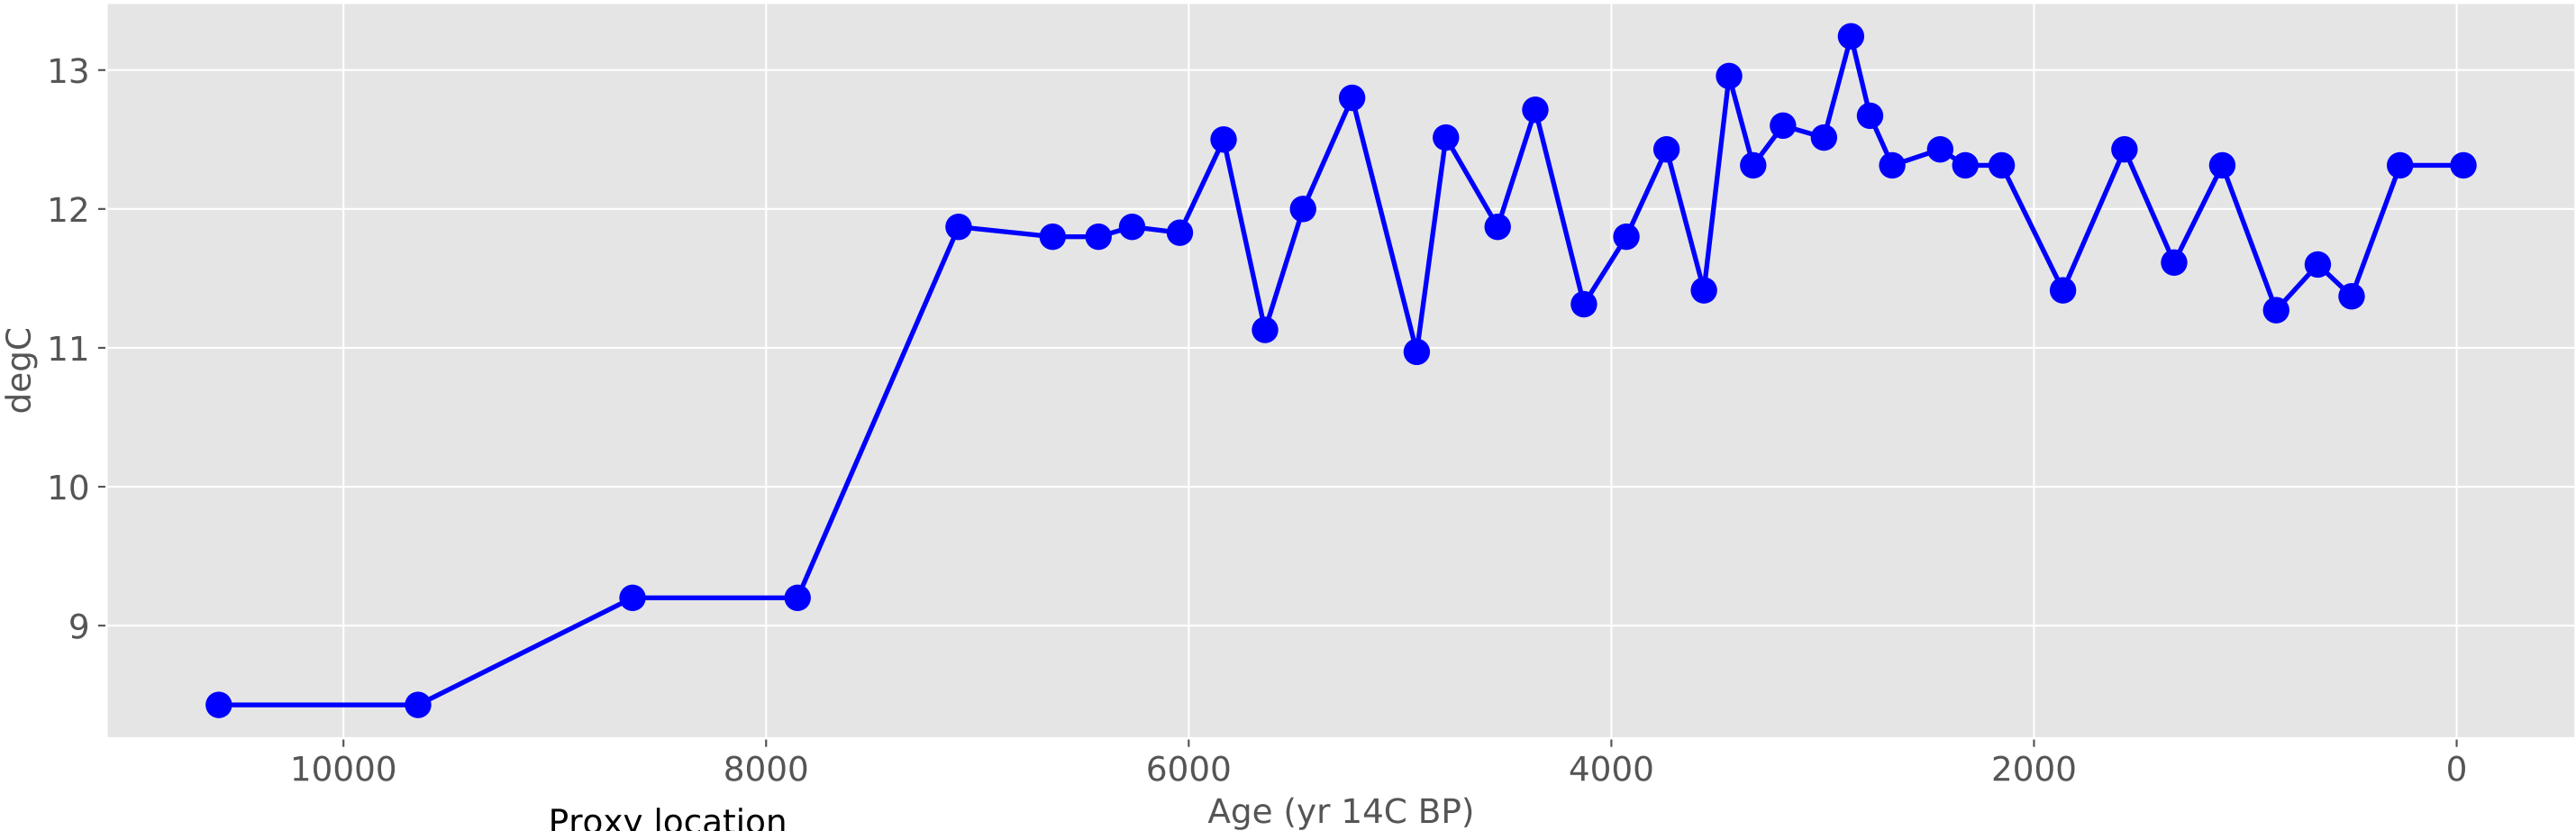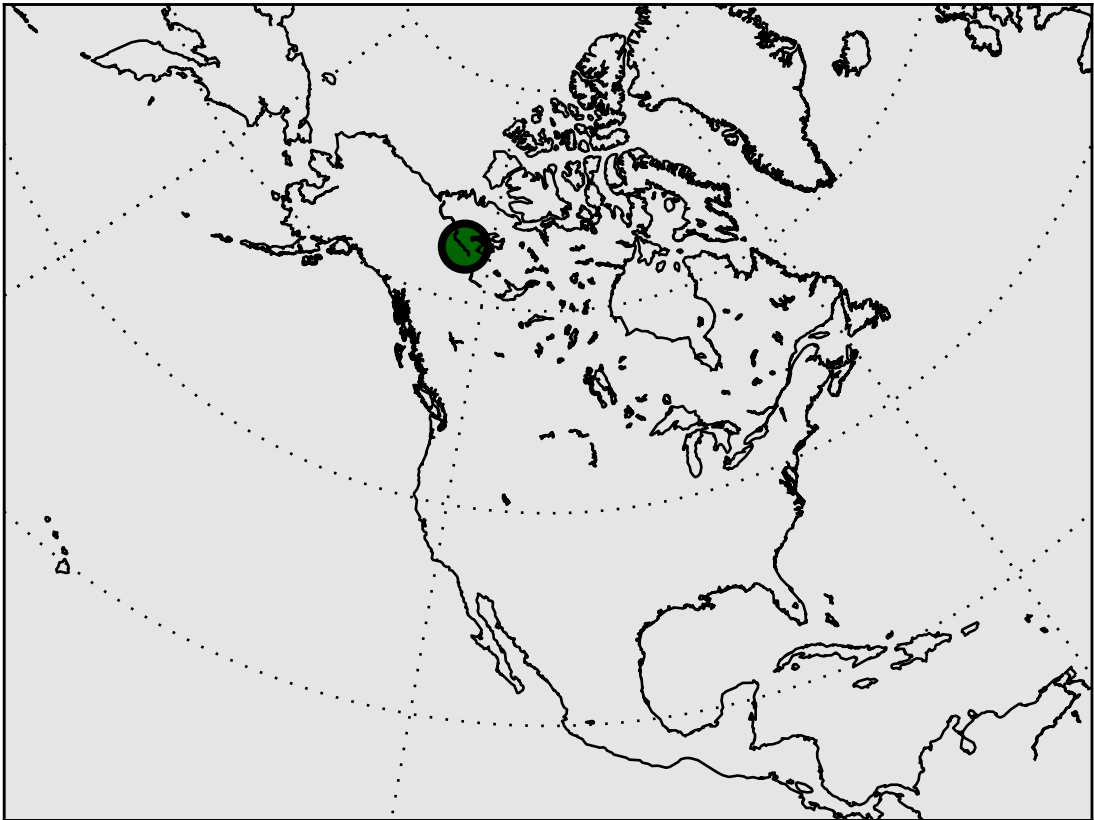

|                    |                                                       |
|--------------------|-------------------------------------------------------|
| Dataset name:      | LacMeleze.MacDonald.1987                              |
| Archive type:      | LakeSediment                                          |
| Proxy type:        | pollen                                                |
| Variable name:     | temperature                                           |
| Latitude ( ° N):   | 65.22                                                 |
| Longitude ( ° E):  | -126.12                                               |
| Elevation (m):     | 650.0                                                 |
| Interp. variable:  | T                                                     |
| Interp. detail:    | air@surface                                           |
| Interp. season:    | summer+                                               |
| Interp. direction: | positive                                              |
| Pub. 1 title:      | Postglacial vegetation history of the Mackenzie Ri... |
| Pub. 1 authors:    | MacDonald, Glen M.                                    |
| Pub. 1 year:       | 1987                                                  |
| Pub. 1 DOI:        | 10.1016/0033-5894(87)90063-9                          |
| Original data URL: | www.ncdc.noaa.gov/paleo/study/27330                   |

Proxy data and metadata

LakeSediment | pollen | LacMeleze.MacDonald.1987 | M2L8o5wvg1qP

Proxy time series: temperature

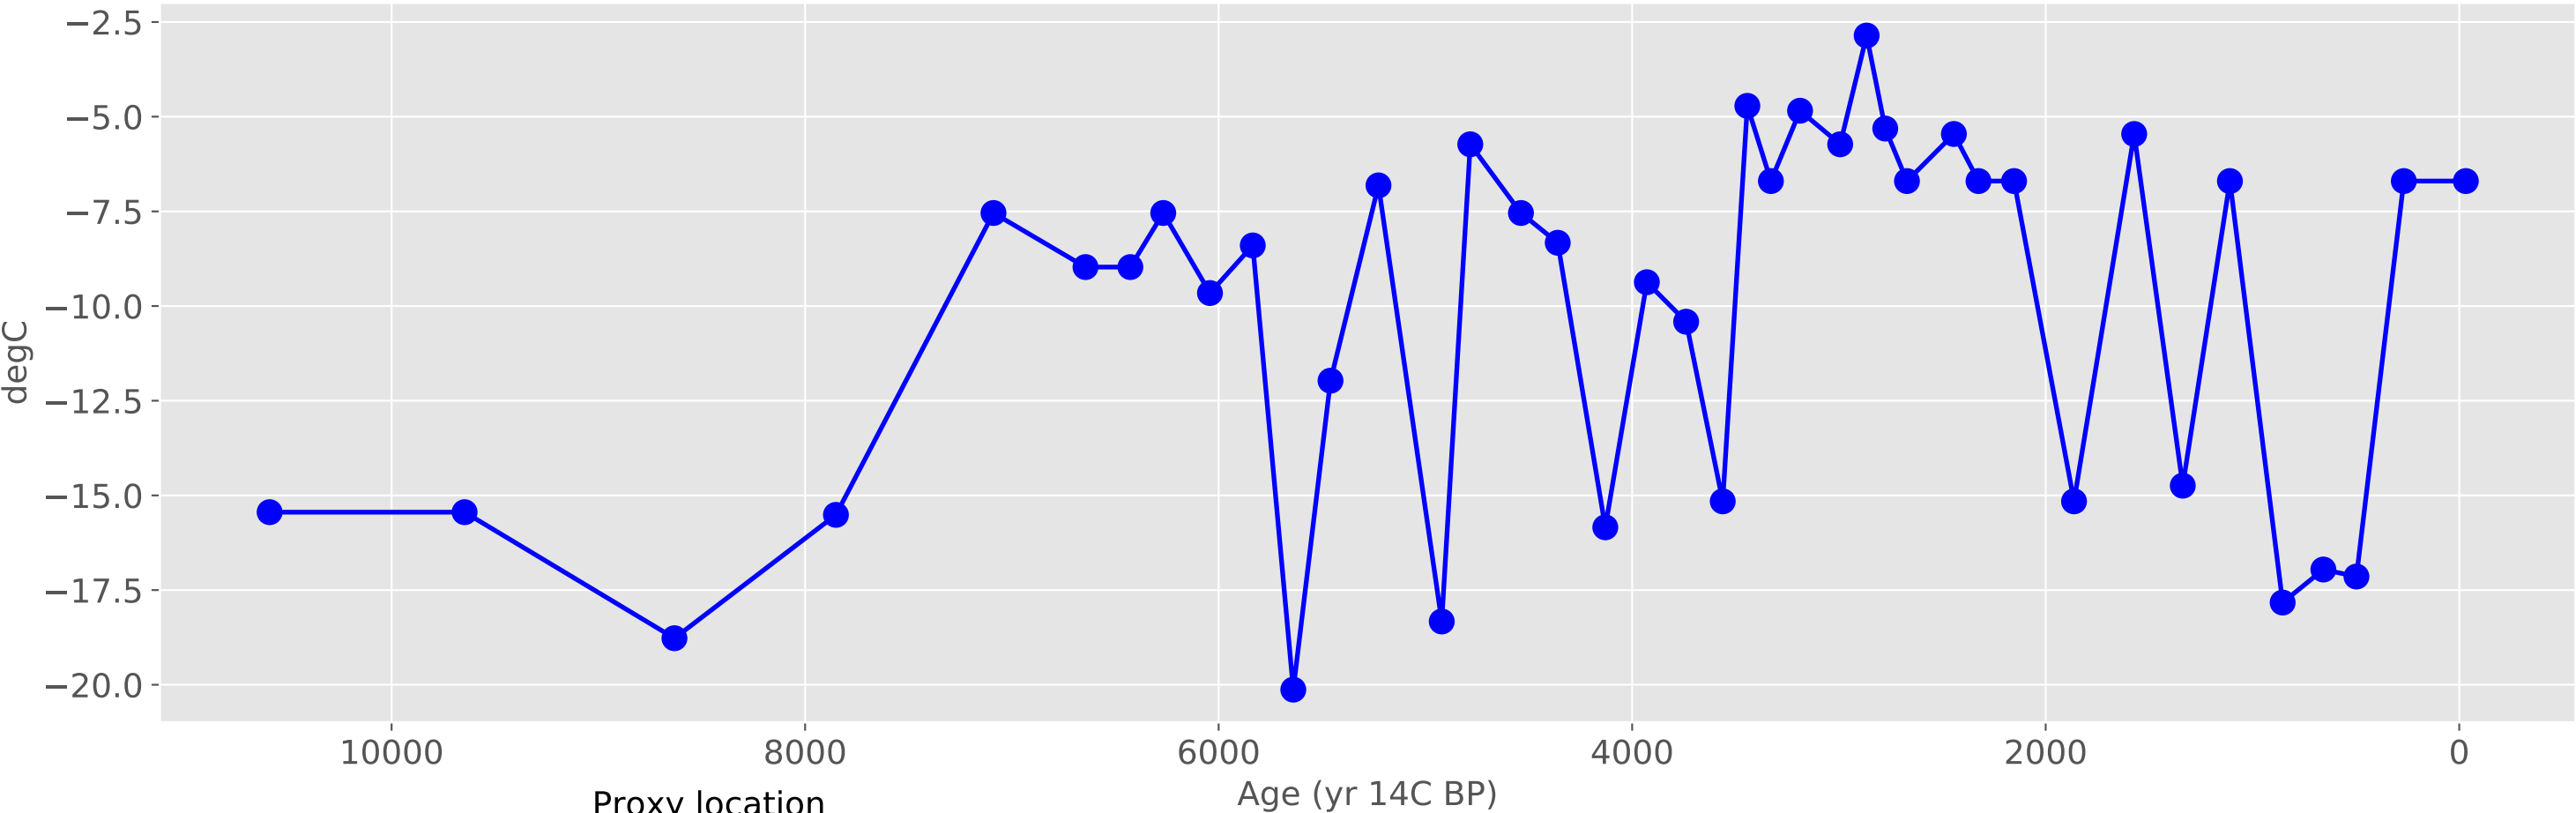

Proxy location  
(65.22 ° N, 126.12 ° W)



|                    |                                                       |
|--------------------|-------------------------------------------------------|
| Dataset name:      | LacMeleze.MacDonald.1987                              |
| Archive type:      | LakeSediment                                          |
| Proxy type:        | pollen                                                |
| Variable name:     | temperature                                           |
| Latitude ( ° N):   | 65.22                                                 |
| Longitude ( ° E):  | -126.12                                               |
| Elevation (m):     | 650.0                                                 |
| Interp. variable:  | T                                                     |
| Interp. detail:    | air@surface                                           |
| Interp. season:    | winter+                                               |
| Interp. direction: | positive                                              |
| Pub. 1 title:      | Postglacial vegetation history of the Mackenzie Ri... |
| Pub. 1 authors:    | MacDonald, Glen M.                                    |
| Pub. 1 year:       | 1987                                                  |
| Pub. 1 DOI:        | 10.1016/0033-5894(87)90063-9                          |
| Original data URL: | www.ncdc.noaa.gov/paleo/study/27330                   |

Proxy data and metadata  
LakeSediment | pollen | LacMeleze.MacDonald.1987 | M2Lzztaq4rxP

Proxy time series: temperature

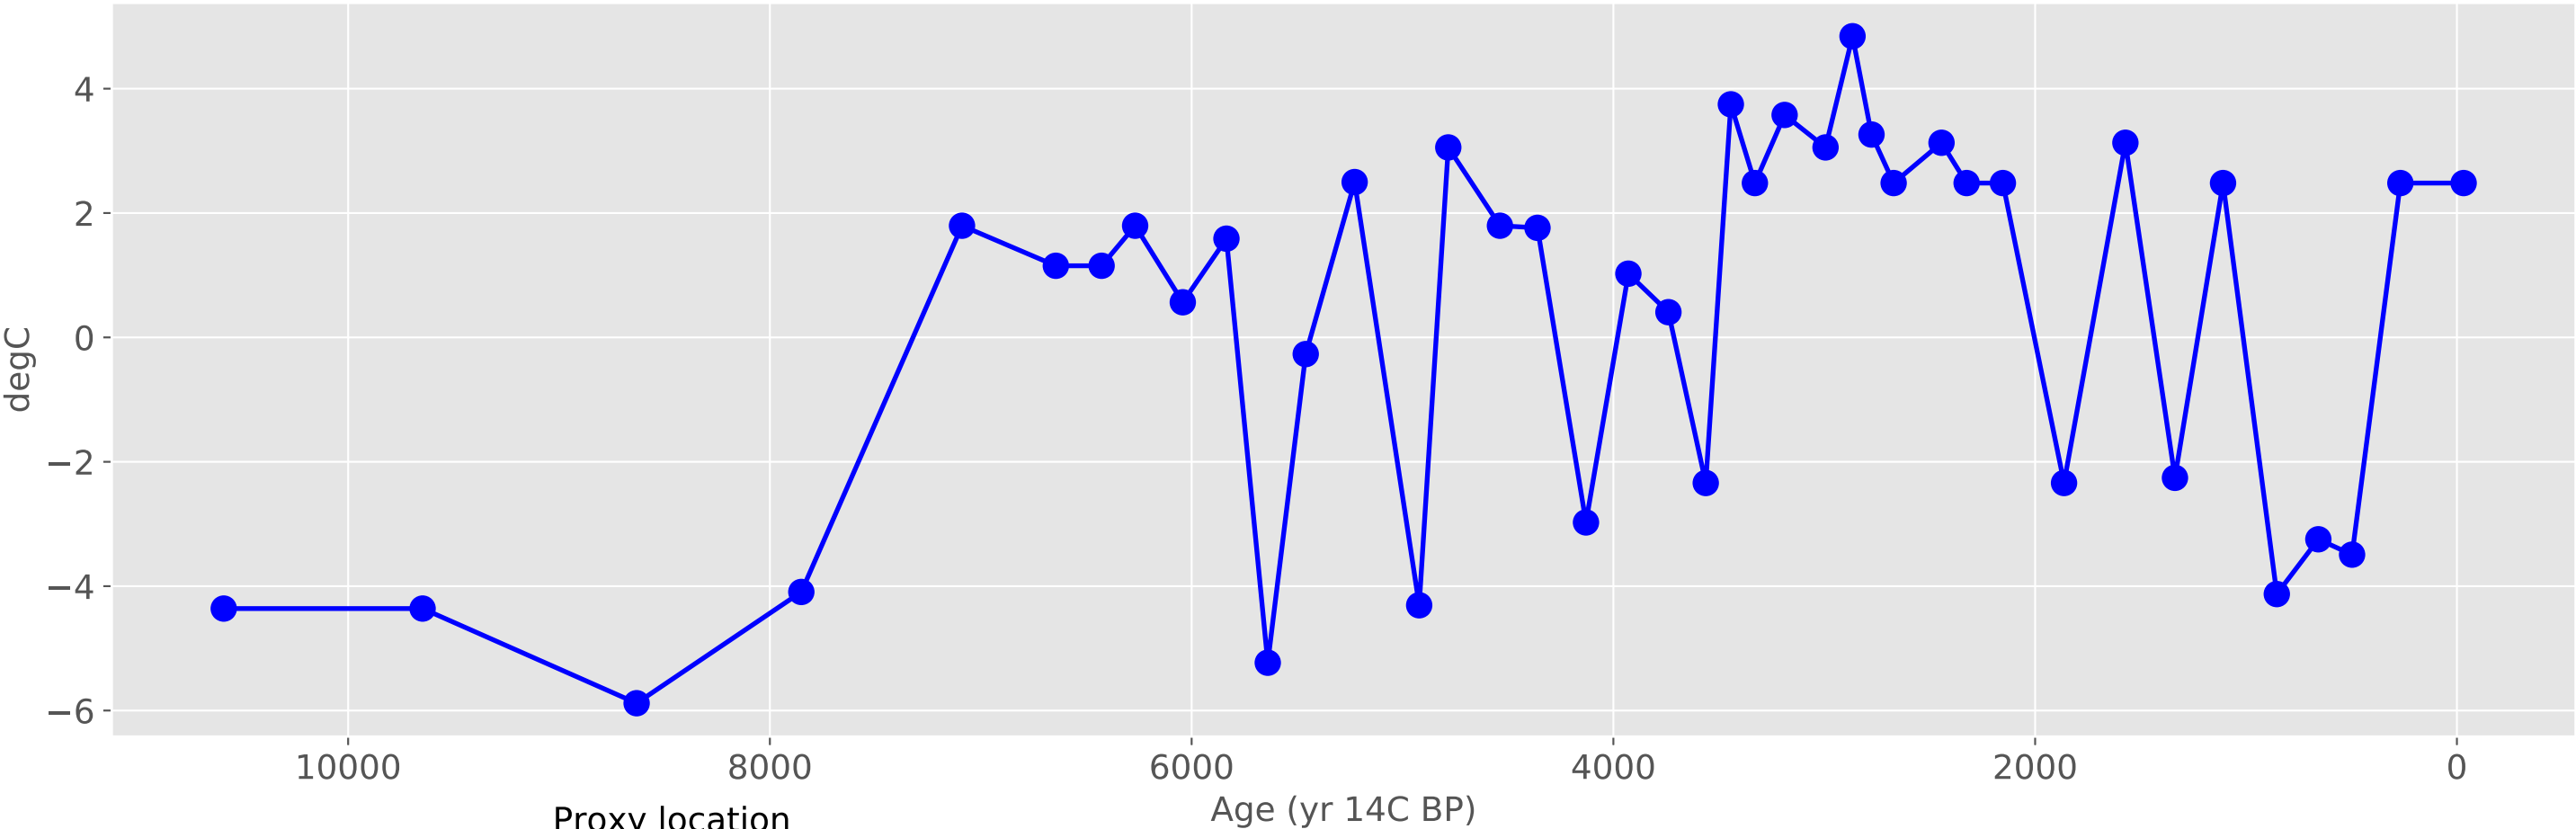

Proxy location  
(65.22 ° N, 126.12 ° W)

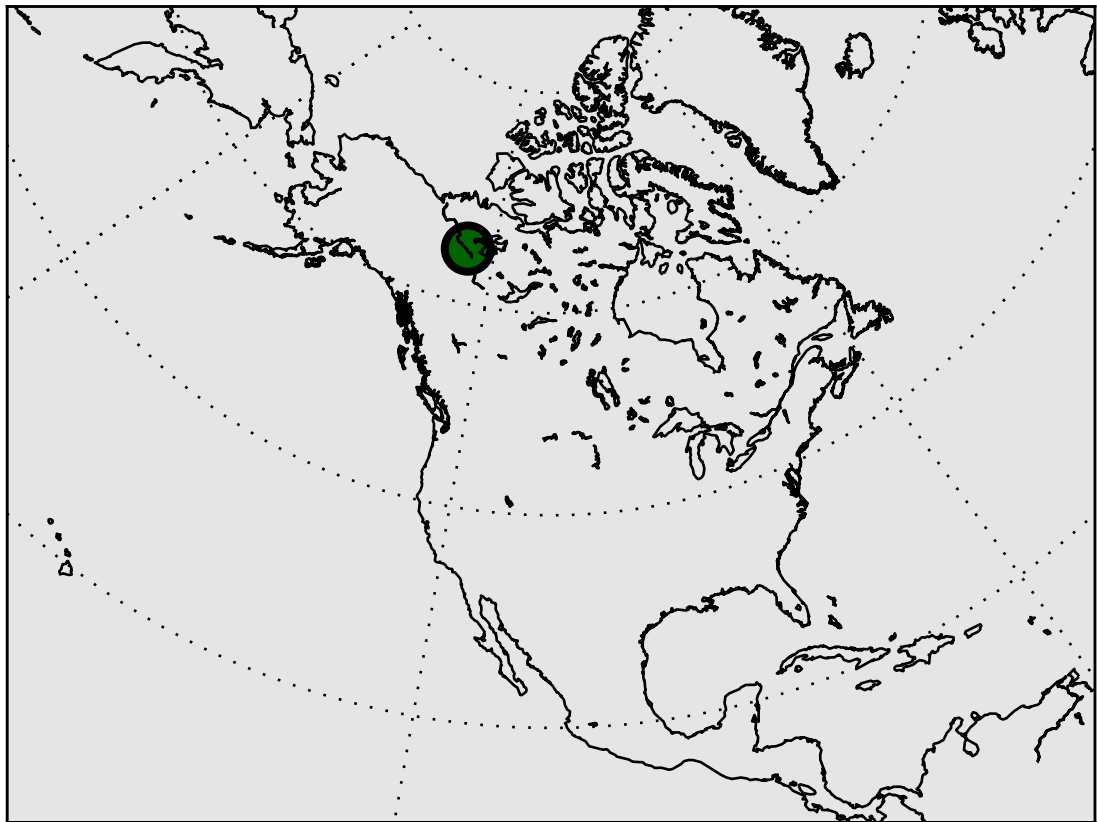

|                    |                                                                                              |
|--------------------|----------------------------------------------------------------------------------------------|
| Dataset name:      | LacMeleze.MacDonald.1987                                                                     |
| Archive type:      | LakeSediment                                                                                 |
| Proxy type:        | pollen                                                                                       |
| Variable name:     | temperature                                                                                  |
| Latitude ( ° N):   | 65.22                                                                                        |
| Longitude ( ° E):  | -126.12                                                                                      |
| Elevation (m):     | 650.0                                                                                        |
| Interp. variable:  | T                                                                                            |
| Interp. detail:    | air@surface                                                                                  |
| Interp. season:    | annual                                                                                       |
| Interp. direction: | positive                                                                                     |
| Pub. 1 title:      | Postglacial vegetation history of the Mackenzie Ri...                                        |
| Pub. 1 authors:    | MacDonald, Glen M.                                                                           |
| Pub. 1 year:       | 1987                                                                                         |
| Pub. 1 DOI:        | 10.1016/0033-5894(87)90063-9                                                                 |
| Original data URL: | <a href="http://www.ncdc.noaa.gov/paleo/study/27330">www.ncdc.noaa.gov/paleo/study/27330</a> |

Proxy data and metadata  
LakeSediment | pollen | BellsLake.Szeicz.1995 | PYTNNSXZFMF

Proxy time series: temperature

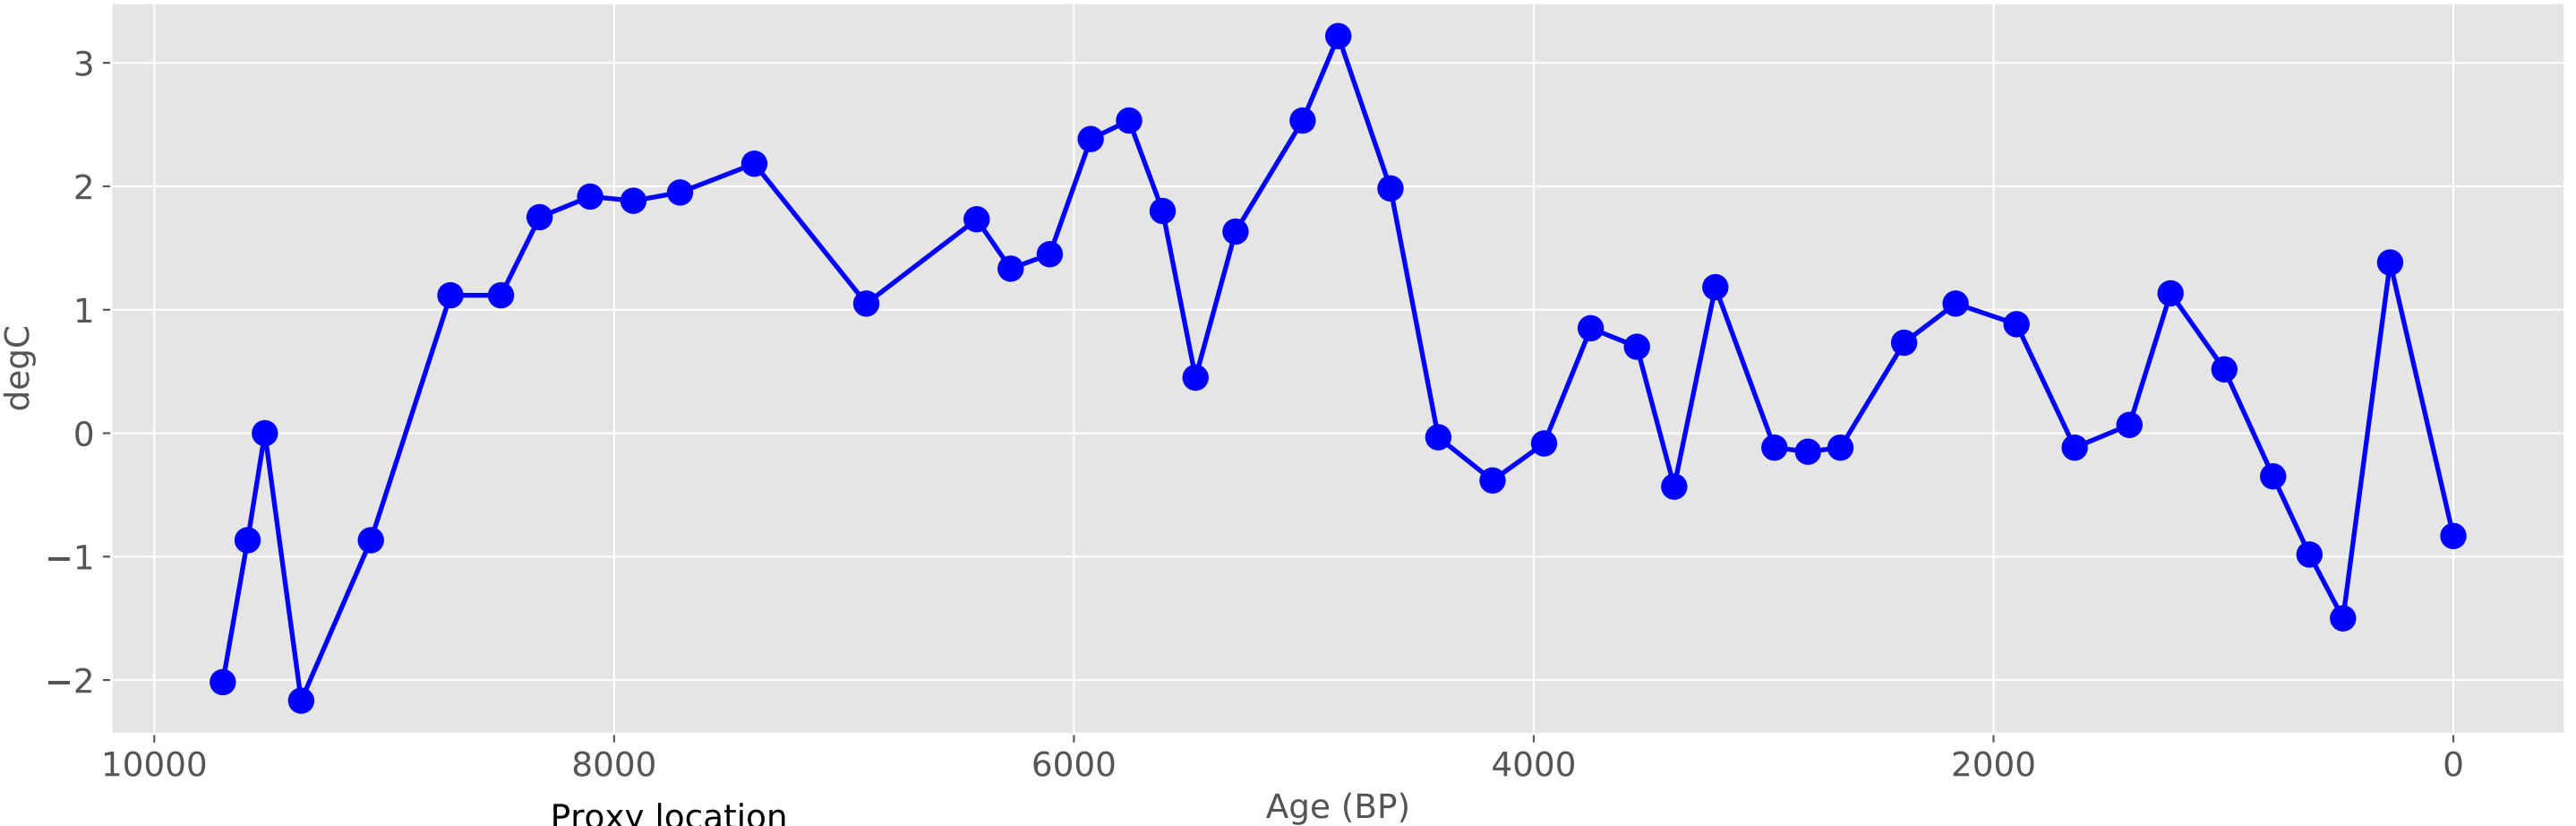

Proxy location  
(65.02 ° N, 127.48 ° W)

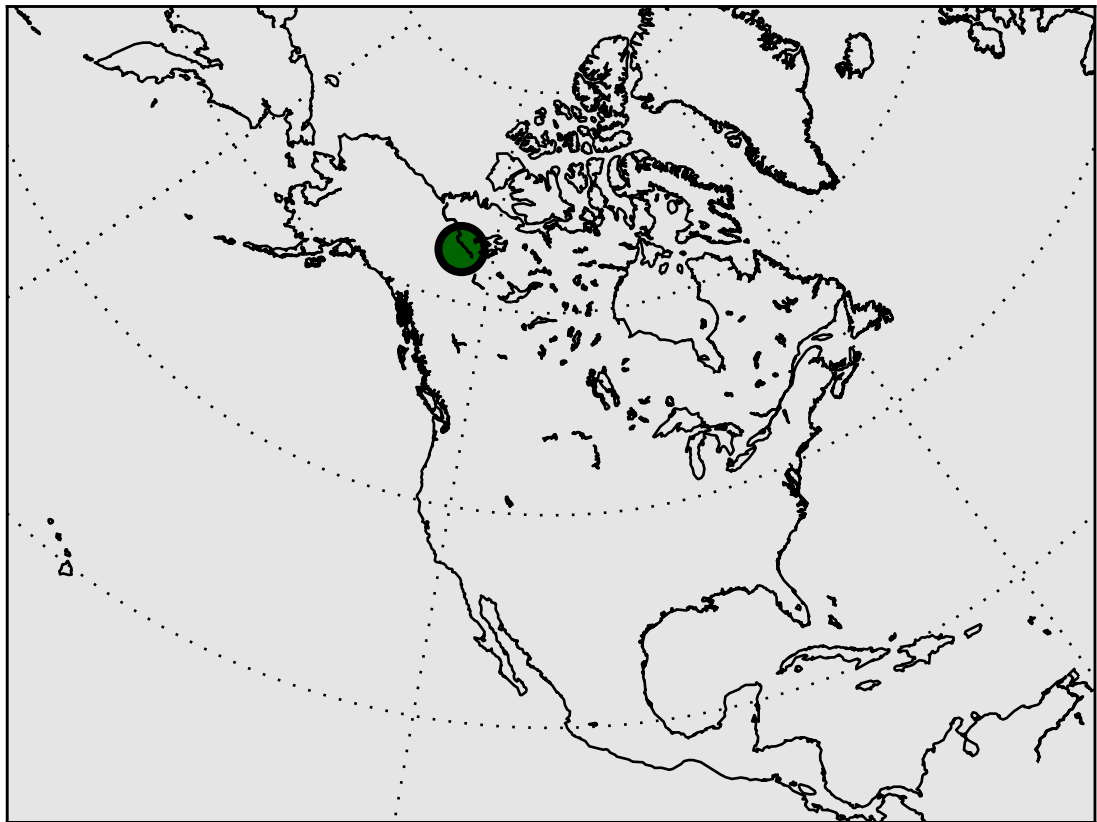

|                    |                                                       |
|--------------------|-------------------------------------------------------|
| Dataset name:      | BellsLake.Szeicz.1995                                 |
| Archive type:      | LakeSediment                                          |
| Proxy type:        | pollen                                                |
| Variable name:     | temperature                                           |
| Latitude ( ° N):   | 65.02                                                 |
| Longitude ( ° E):  | -127.48                                               |
| Elevation (m):     | 580.0                                                 |
| Interp. variable:  | T                                                     |
| Interp. detail:    | air@surface                                           |
| Interp. season:    | winter+                                               |
| Interp. direction: | positive                                              |
| Pub. 1 title:      | Late Quaternary vegetation history of the central ... |
| Pub. 1 authors:    | Szeicz, Julian M.; MacDonald, Glen M.; Duk-Rodkin,... |
| Pub. 1 year:       | 1995                                                  |
| Pub. 1 DOI:        | 10.1016/0031-0182(95)00070-3                          |
| Original data URL: | 10.21233/N35G6P                                       |

Proxy data and metadata  
LakeSediment | pollen | BellsLake.Szeicz.1995 | PYTV40H8PKH

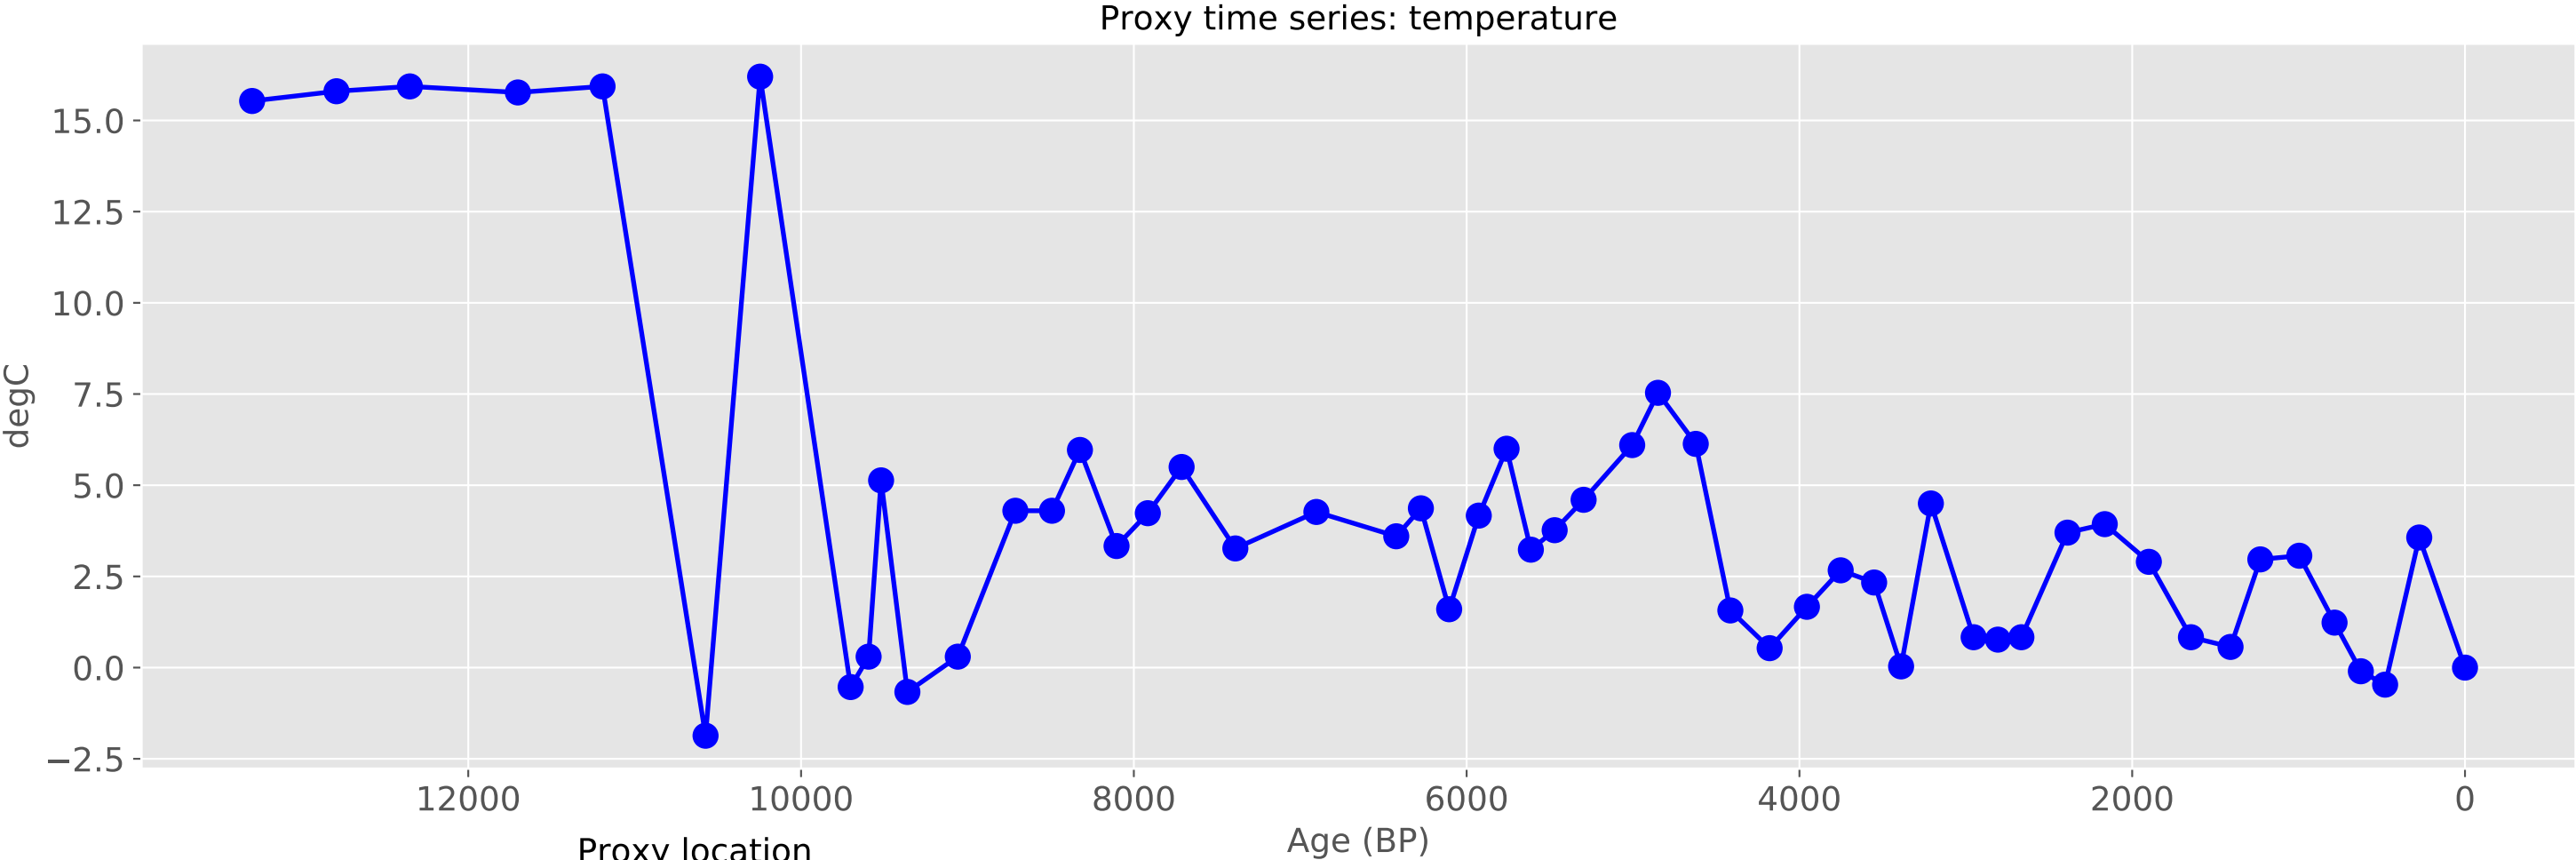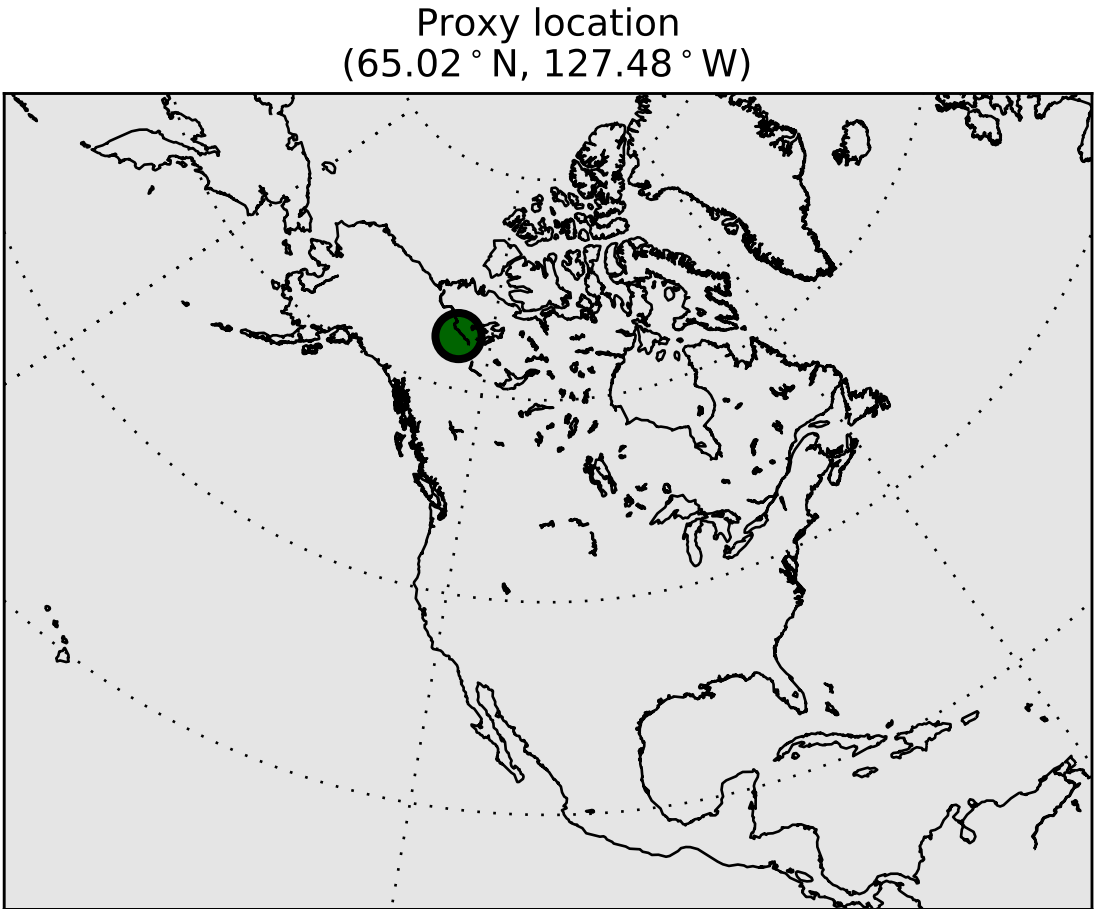

|                    |                                                       |
|--------------------|-------------------------------------------------------|
| Dataset name:      | BellsLake.Szeicz.1995                                 |
| Archive type:      | LakeSediment                                          |
| Proxy type:        | pollen                                                |
| Variable name:     | temperature                                           |
| Latitude ( ° N):   | 65.02                                                 |
| Longitude ( ° E):  | -127.48                                               |
| Elevation (m):     | 580.0                                                 |
| Interp. variable:  | T                                                     |
| Interp. detail:    | air@surface                                           |
| Interp. season:    | summer+                                               |
| Interp. direction: | positive                                              |
| Pub. 1 title:      | Late Quaternary vegetation history of the central ... |
| Pub. 1 authors:    | Szeicz, Julian M.; MacDonald, Glen M.; Duk-Rodkin,... |
| Pub. 1 year:       | 1995                                                  |
| Pub. 1 DOI:        | 10.1016/0031-0182(95)00070-3                          |
| Original data URL: | 10.21233/N35G6P                                       |



Proxy data and metadata  
LakeSediment | pollen | BellsLake.Szeicz.1995 | PYTVNS0ID3T

Proxy time series: precipitation

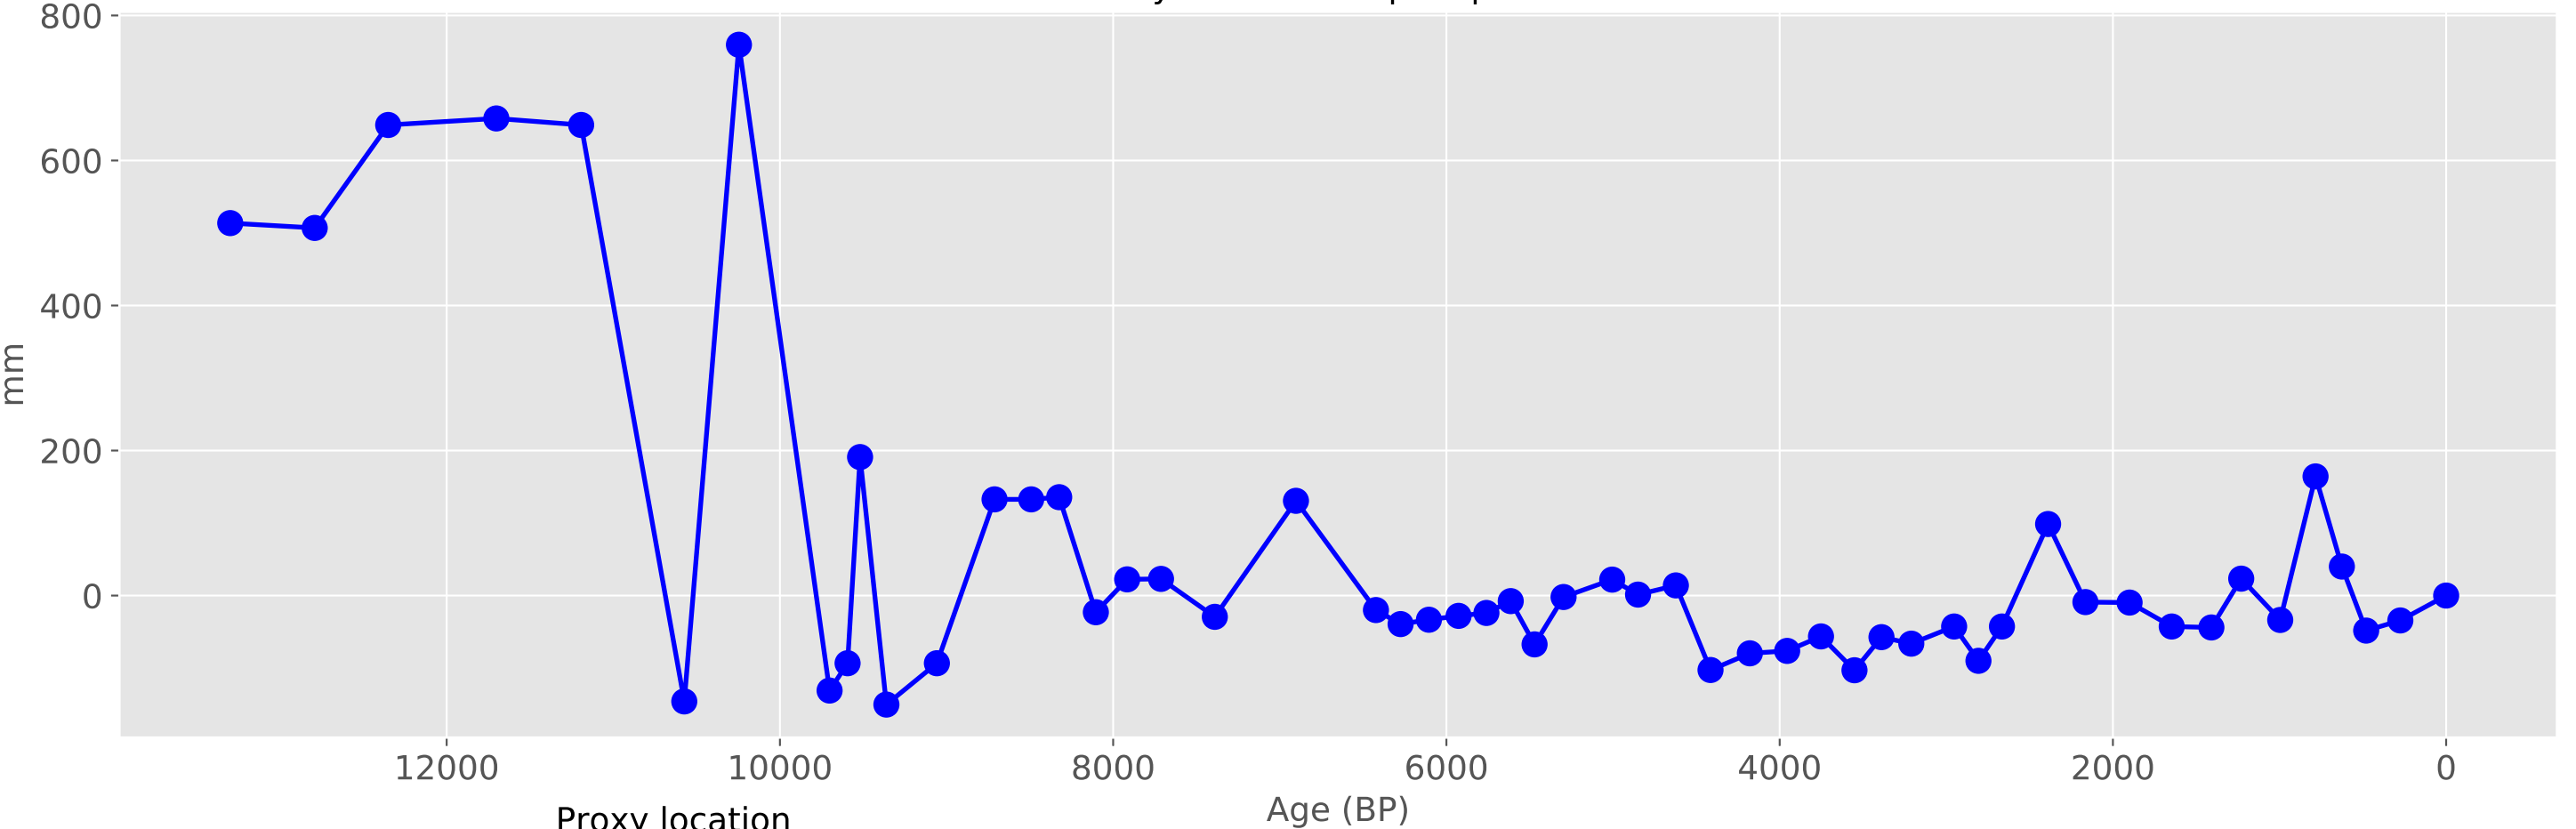

Proxy location  
(65.02 ° N, 127.48 ° W)



|                    |                                                       |
|--------------------|-------------------------------------------------------|
| Dataset name:      | BellsLake.Szeicz.1995                                 |
| Archive type:      | LakeSediment                                          |
| Proxy type:        | pollen                                                |
| Variable name:     | precipitation                                         |
| Latitude ( ° N):   | 65.02                                                 |
| Longitude ( ° E):  | -127.48                                               |
| Elevation (m):     | 580.0                                                 |
| Interp. variable:  | P                                                     |
| Interp. detail:    | amount@surface                                        |
| Interp. season:    | annual                                                |
| Interp. direction: | positive                                              |
| Pub. 1 title:      | Late Quaternary vegetation history of the central ... |
| Pub. 1 authors:    | Szeicz, Julian M.; MacDonald, Glen M.; Duk-Rodkin,... |
| Pub. 1 year:       | 1995                                                  |
| Pub. 1 DOI:        | 10.1016/0031-0182(95)00070-3                          |
| Original data URL: | 10.21233/N35G6P                                       |

Proxy data and metadata  
LakeSediment | pollen | BellsLake.Szeicz.1995 | RAP1dzJLThI

Proxy time series: temperatureComposite

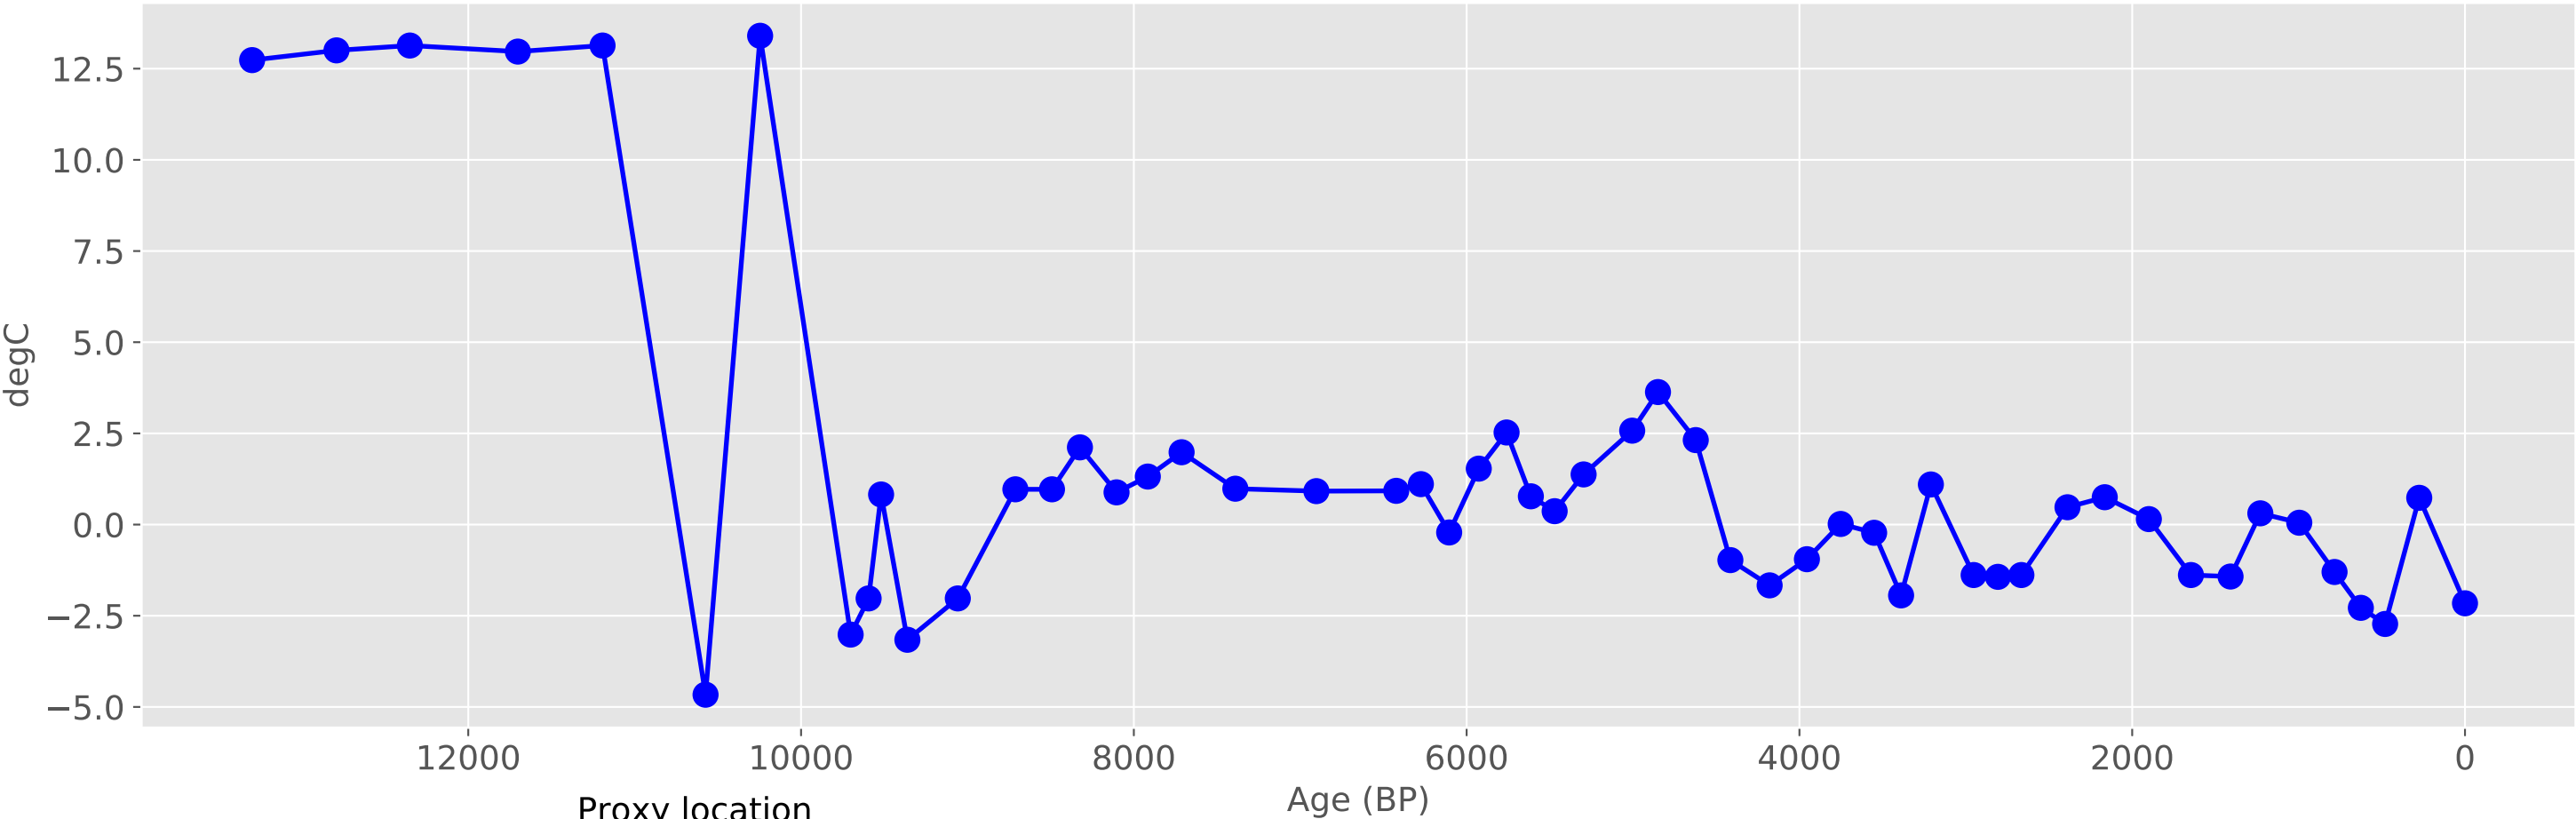

Proxy location  
(65.02 ° N, 127.48 ° W)



|                    |                                                       |
|--------------------|-------------------------------------------------------|
| Dataset name:      | BellsLake.Szeicz.1995                                 |
| Archive type:      | LakeSediment                                          |
| Proxy type:        | pollen                                                |
| Variable name:     | temperatureComposite                                  |
| Latitude ( ° N):   | 65.02                                                 |
| Longitude ( ° E):  | -127.48                                               |
| Elevation (m):     | 580.0                                                 |
| Interp. variable:  | T                                                     |
| Interp. detail:    | air@surface                                           |
| Interp. season:    | annual                                                |
| Interp. direction: | positive                                              |
| Pub. 1 title:      | Late Quaternary vegetation history of the central ... |
| Pub. 1 authors:    | Szeicz, Julian M.; MacDonald, Glen M.; Duk-Rodkin,... |
| Pub. 1 year:       | 1995                                                  |
| Pub. 1 DOI:        | 10.1016/0031-0182(95)00070-3                          |
| Original data URL: | 10.21233/N35G6P                                       |

Proxy data and metadata  
LakeSediment | pollen | Andy.Szeicz.1995 | PYTCLN8P1CL

Proxy time series: temperature

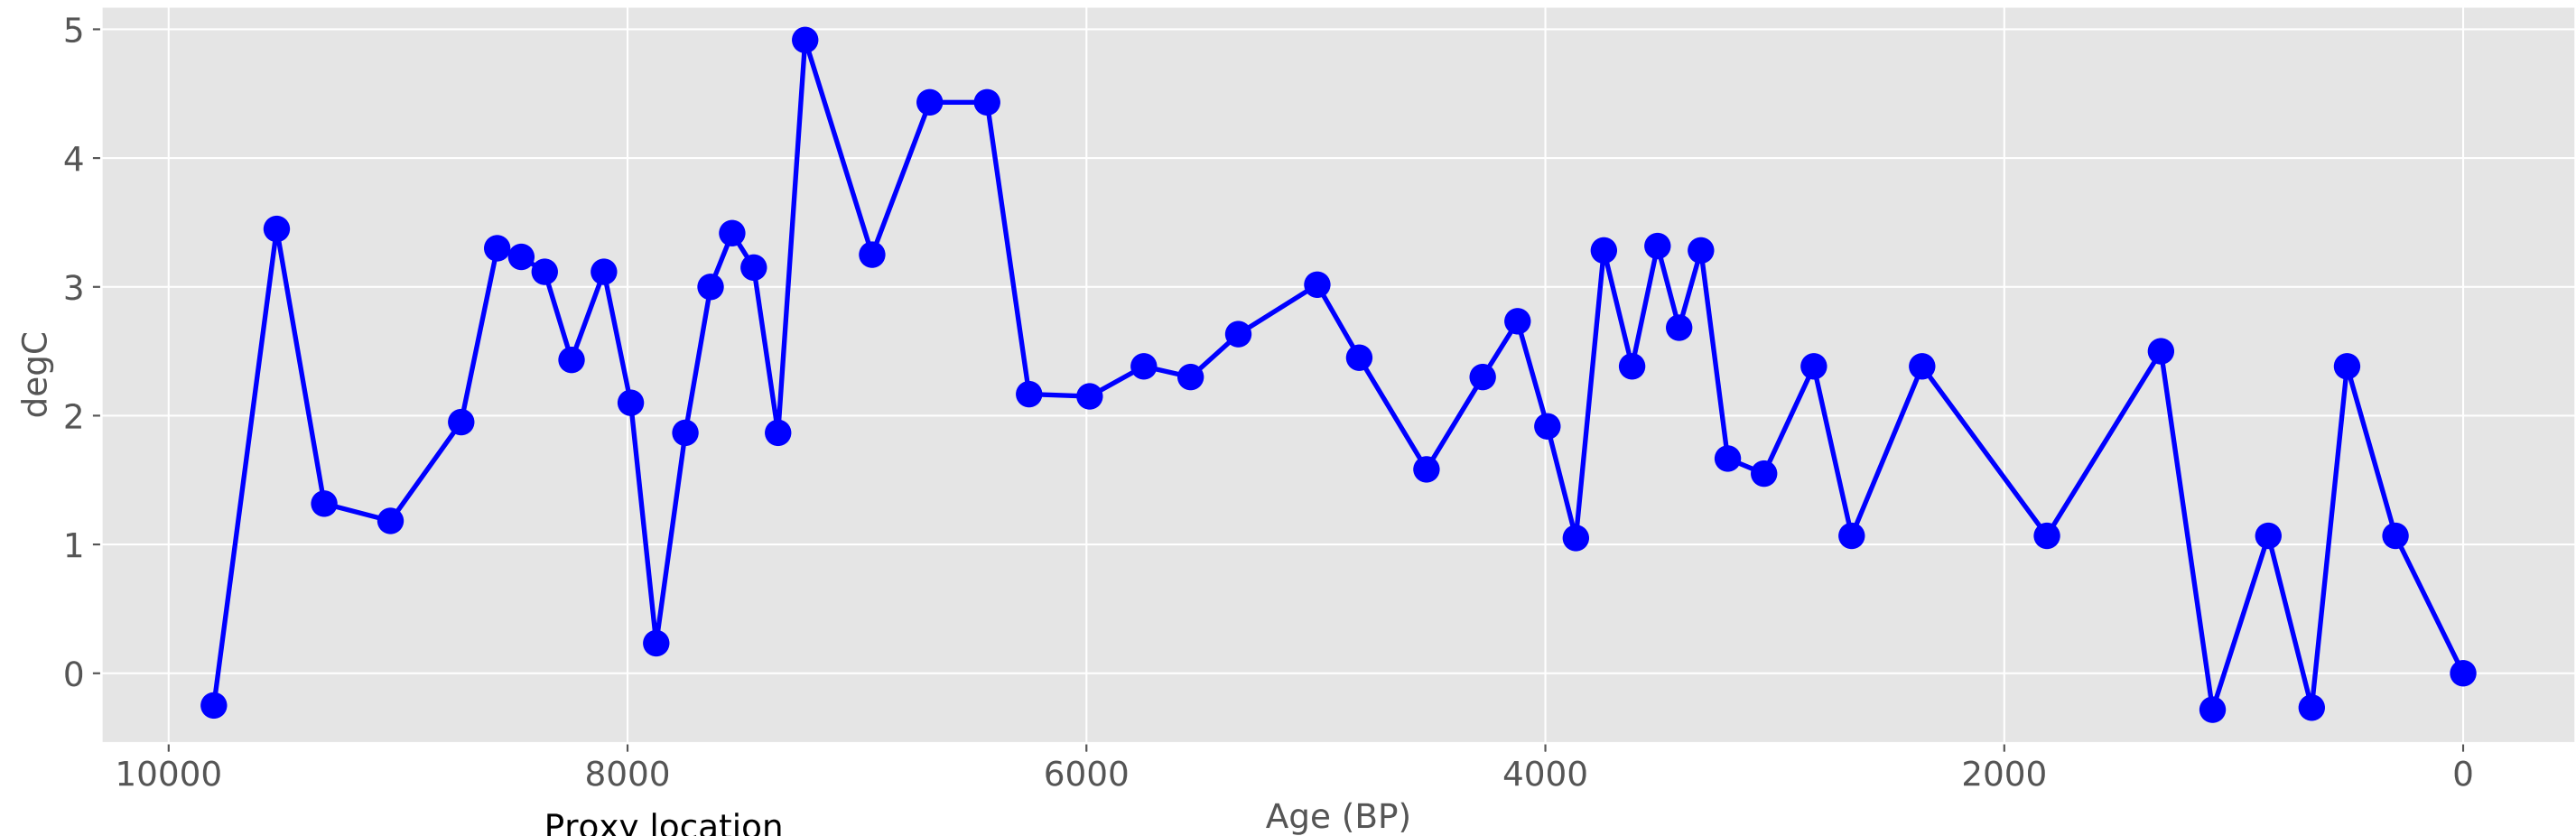

Proxy location  
(64.65 ° N, 128.08 ° W)

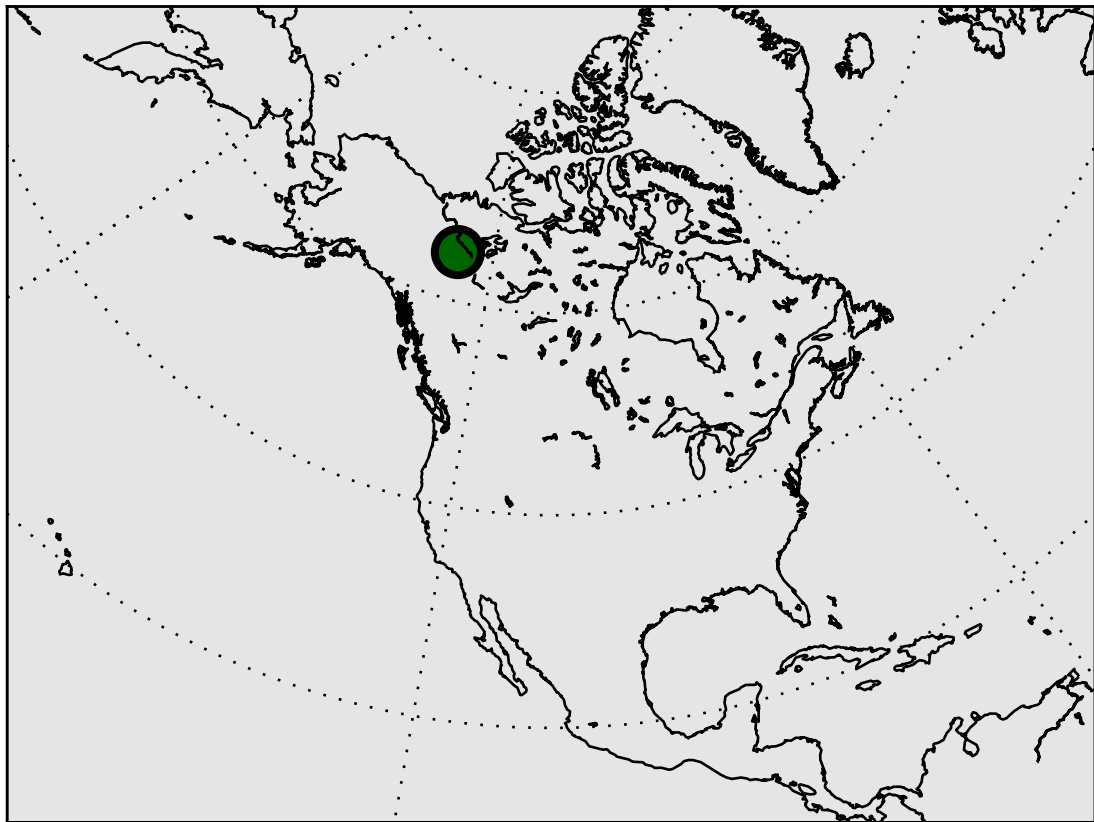

|                    |                                                       |
|--------------------|-------------------------------------------------------|
| Dataset name:      | Andy.Szeicz.1995                                      |
| Archive type:      | LakeSediment                                          |
| Proxy type:        | pollen                                                |
| Variable name:     | temperature                                           |
| Latitude ( ° N):   | 64.65                                                 |
| Longitude ( ° E):  | -128.08                                               |
| Elevation (m):     | 1360.0                                                |
| Interp. variable:  | T                                                     |
| Interp. detail:    | air@surface                                           |
| Interp. season:    | summer+                                               |
| Interp. direction: | positive                                              |
| Pub. 1 title:      | Late Quaternary vegetation history of the central ... |
| Pub. 1 authors:    | Szeicz, Julian M.; MacDonald, Glen M.; Duk-Rodkin,... |
| Pub. 1 year:       | 1995                                                  |
| Pub. 1 DOI:        | 10.1016/0031-0182(95)00070-3                          |
| Original data URL: | www.ncdc.noaa.gov/paleo/study/15444                   |

Proxy data and metadata  
LakeSediment | pollen | Andy.Szeicz.1995 | PYTCPIAO06Y

Proxy time series: precipitation

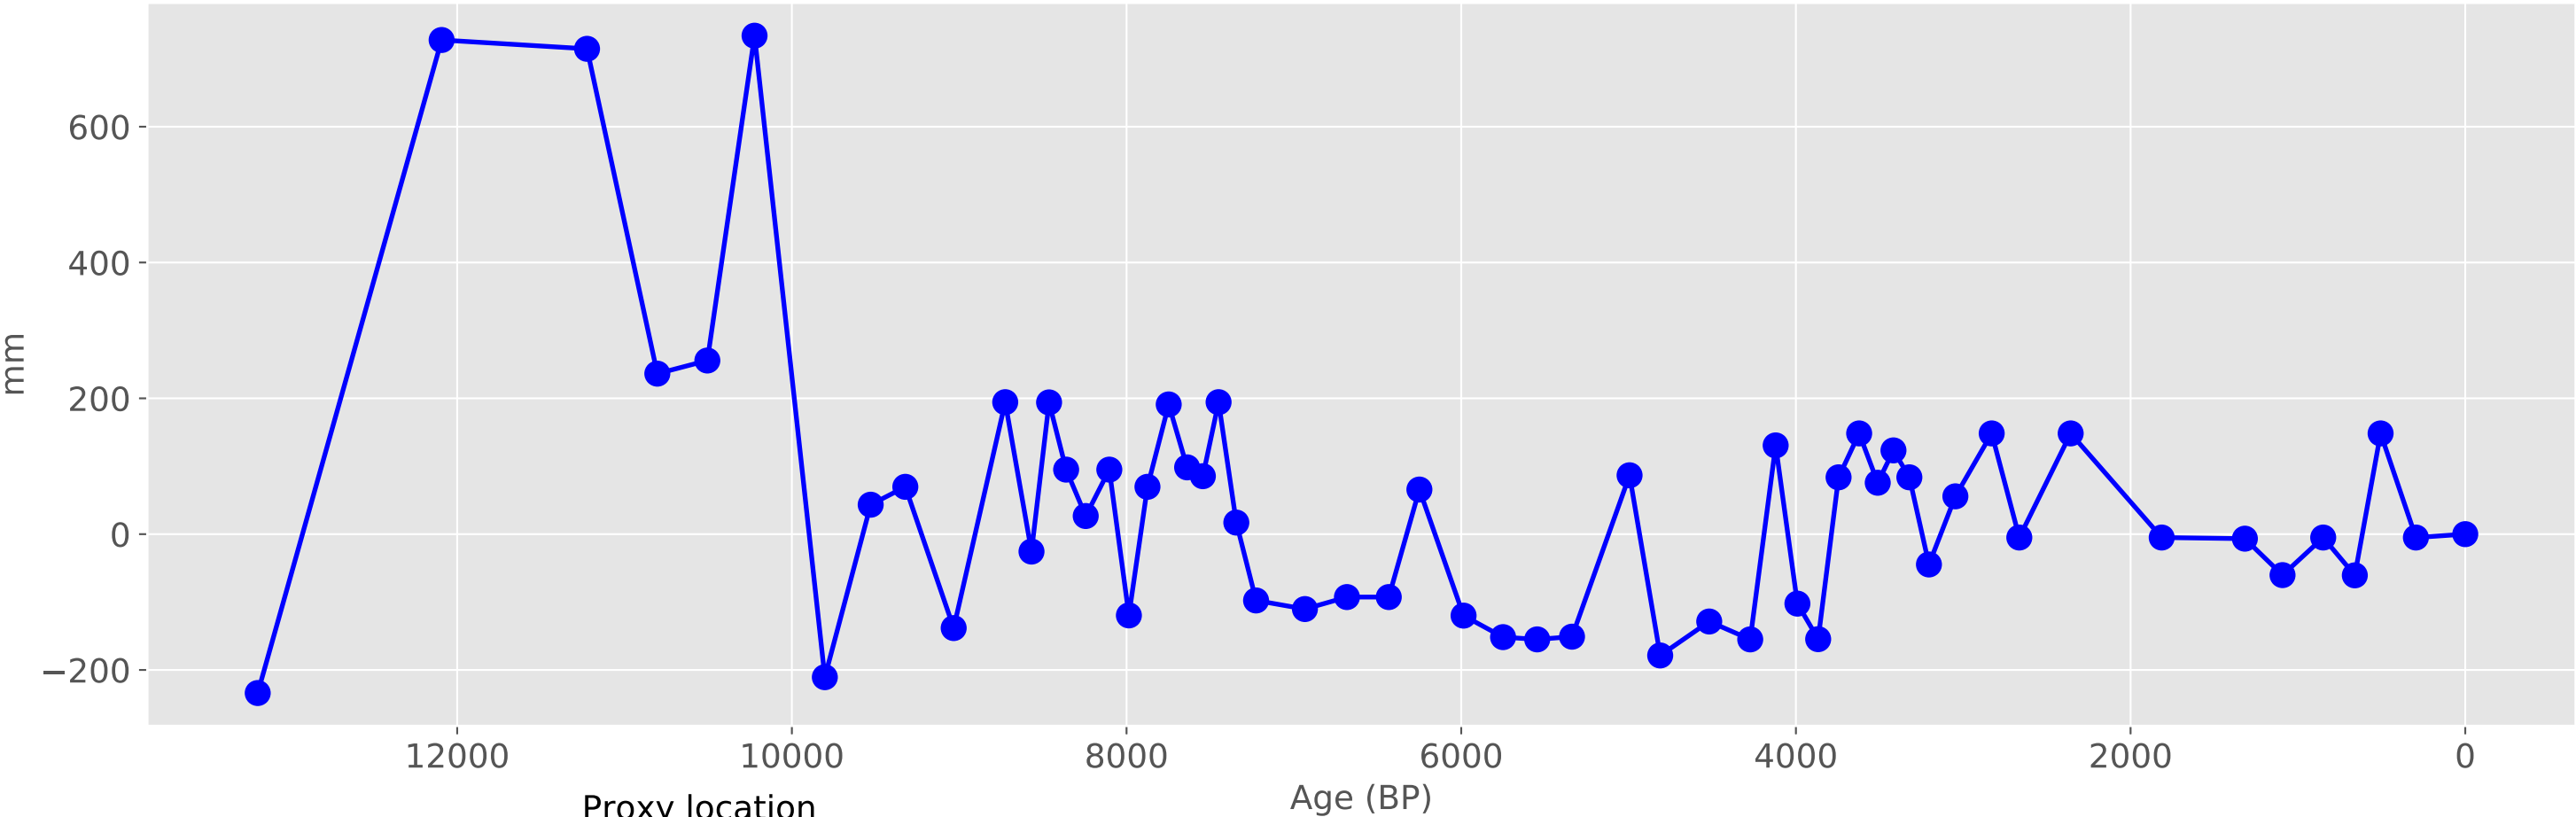

Proxy location  
(64.65 ° N, 128.08 ° W)

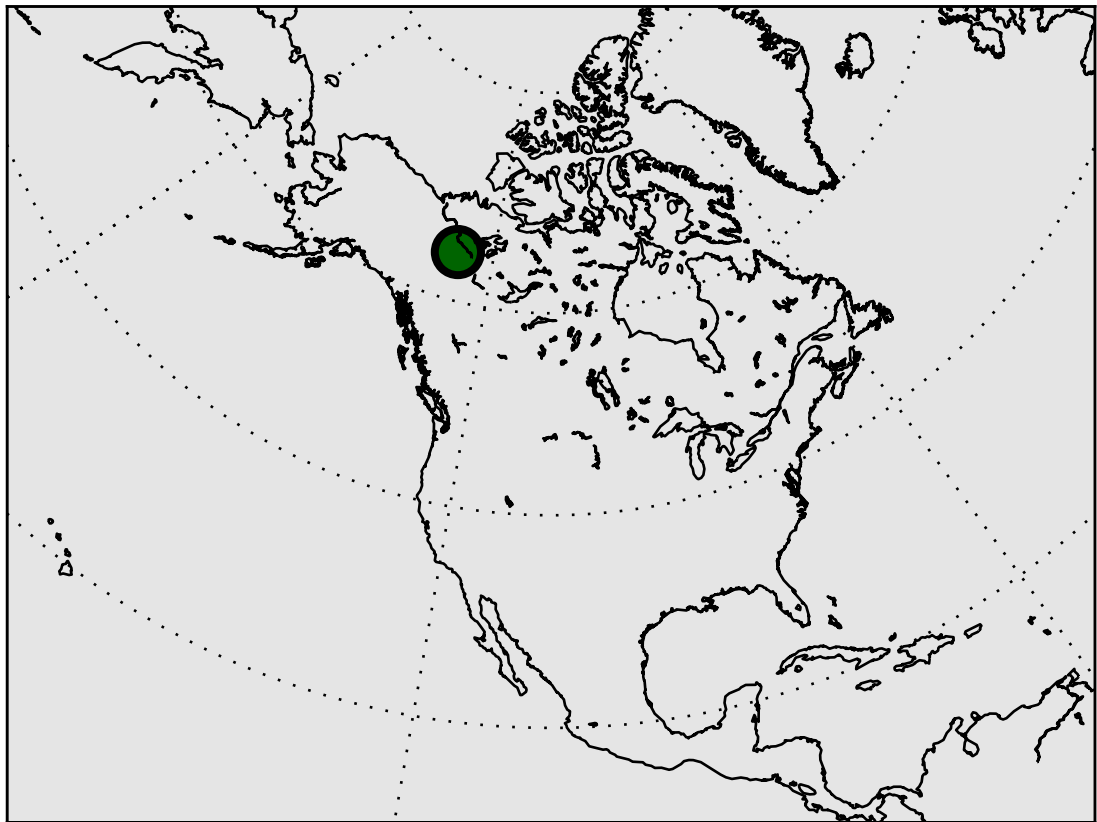

|                    |                                                       |
|--------------------|-------------------------------------------------------|
| Dataset name:      | Andy.Szeicz.1995                                      |
| Archive type:      | LakeSediment                                          |
| Proxy type:        | pollen                                                |
| Variable name:     | precipitation                                         |
| Latitude ( ° N):   | 64.65                                                 |
| Longitude ( ° E):  | -128.08                                               |
| Elevation (m):     | 1360.0                                                |
| Interp. variable:  | P                                                     |
| Interp. detail:    | amount@surface                                        |
| Interp. season:    | annual                                                |
| Interp. direction: | positive                                              |
| Pub. 1 title:      | Late Quaternary vegetation history of the central ... |
| Pub. 1 authors:    | Szeicz, Julian M.; MacDonald, Glen M.; Duk-Rodkin,... |
| Pub. 1 year:       | 1995                                                  |
| Pub. 1 DOI:        | 10.1016/0031-0182(95)00070-3                          |
| Original data URL: | www.ncdc.noaa.gov/paleo/study/15444                   |

Proxy data and metadata  
LakeSediment | pollen | Andy.Szeicz.1995 | PYTMLFNC0A7

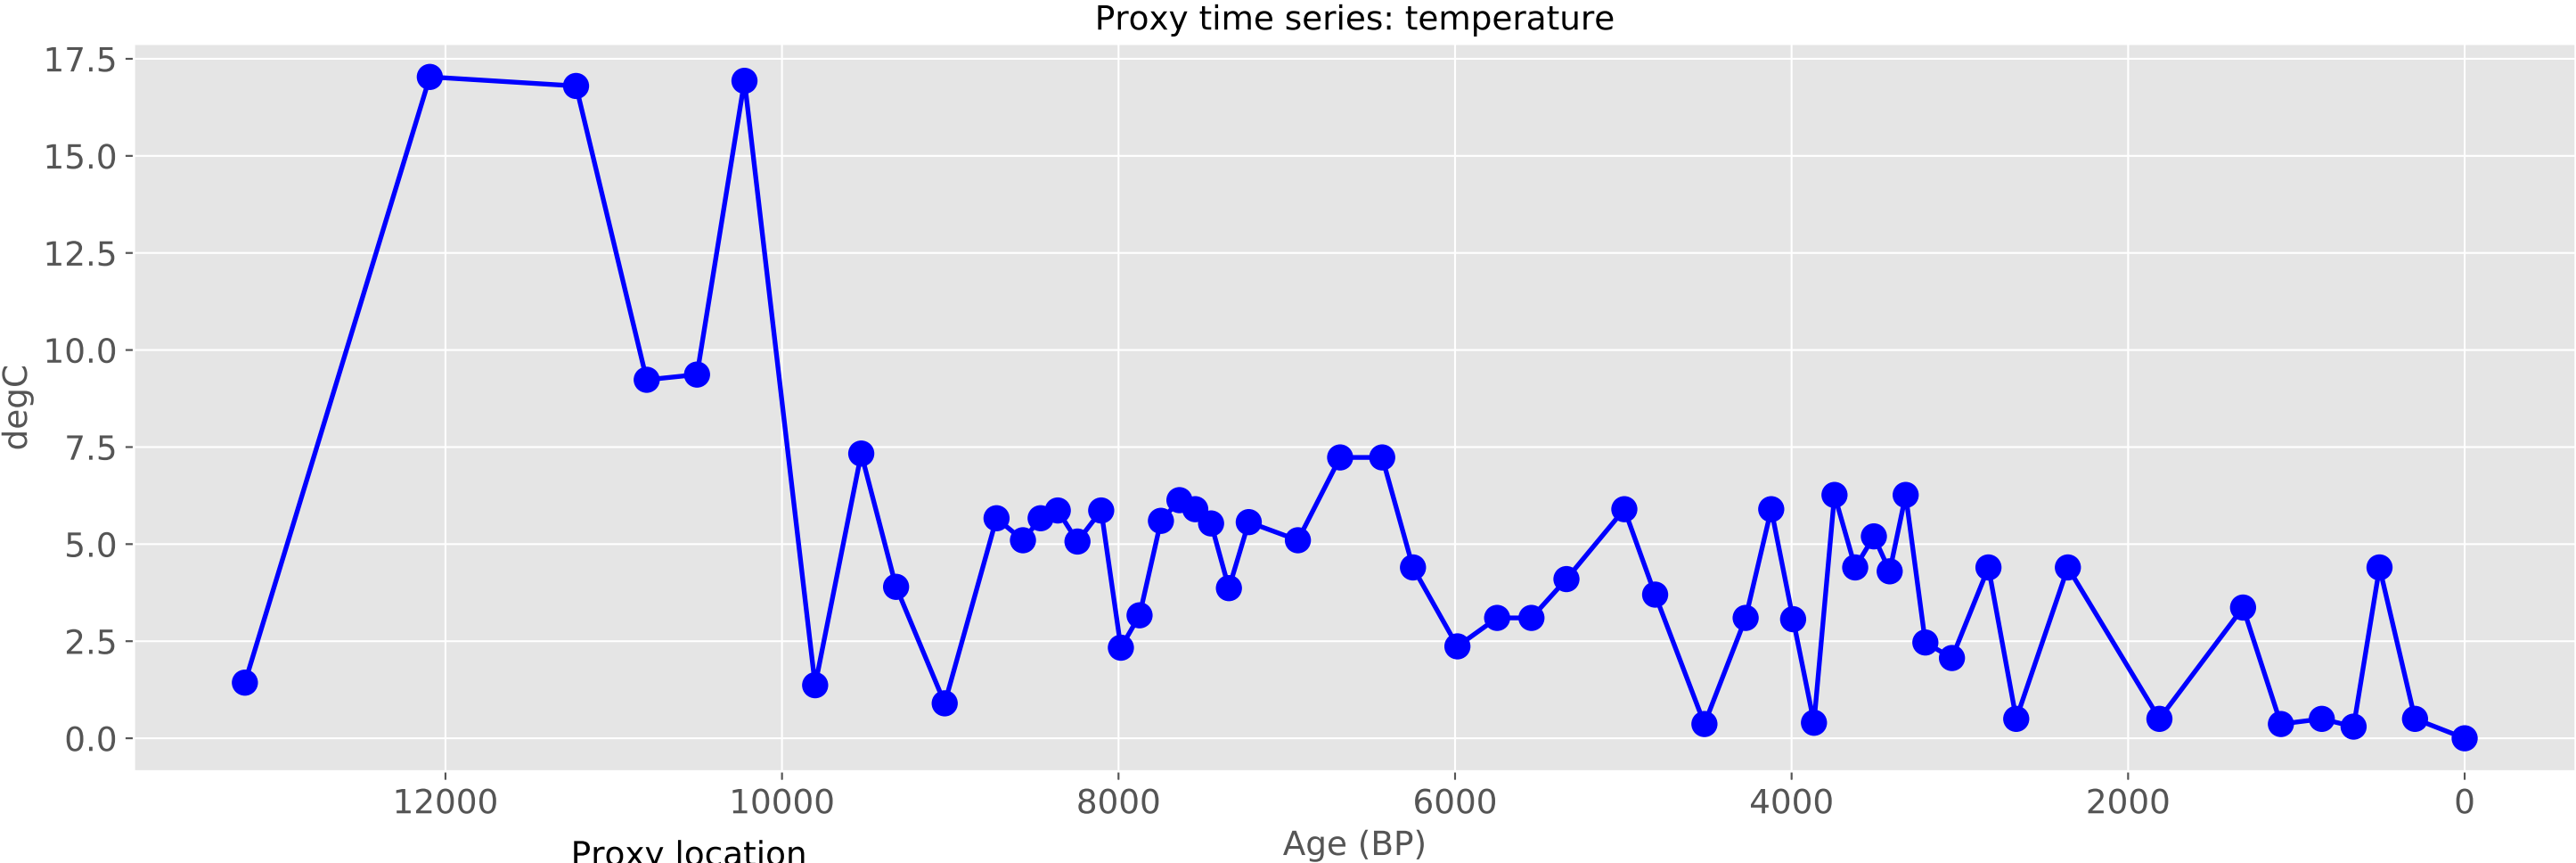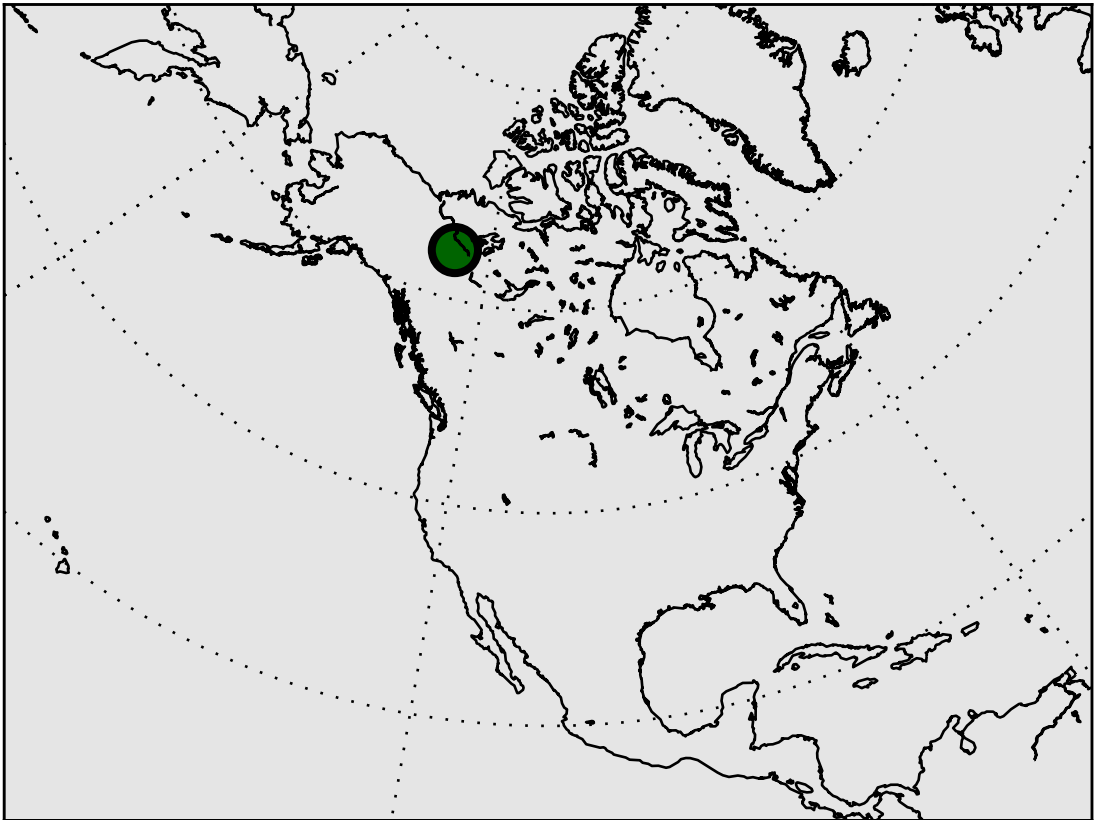

|                    |                                                       |
|--------------------|-------------------------------------------------------|
| Dataset name:      | Andy.Szeicz.1995                                      |
| Archive type:      | LakeSediment                                          |
| Proxy type:        | pollen                                                |
| Variable name:     | temperature                                           |
| Latitude ( ° N):   | 64.65                                                 |
| Longitude ( ° E):  | -128.08                                               |
| Elevation (m):     | 1360.0                                                |
| Interp. variable:  | T                                                     |
| Interp. detail:    | air@surface                                           |
| Interp. season:    | winter+                                               |
| Interp. direction: | positive                                              |
| Pub. 1 title:      | Late Quaternary vegetation history of the central ... |
| Pub. 1 authors:    | Szeicz, Julian M.; MacDonald, Glen M.; Duk-Rodkin,... |
| Pub. 1 year:       | 1995                                                  |
| Pub. 1 DOI:        | 10.1016/0031-0182(95)00070-3                          |
| Original data URL: | www.ncdc.noaa.gov/paleo/study/15444                   |

Proxy data and metadata  
LakeSediment | pollen | Andy.Szeicz.1995 | RSvtlc0N66Y

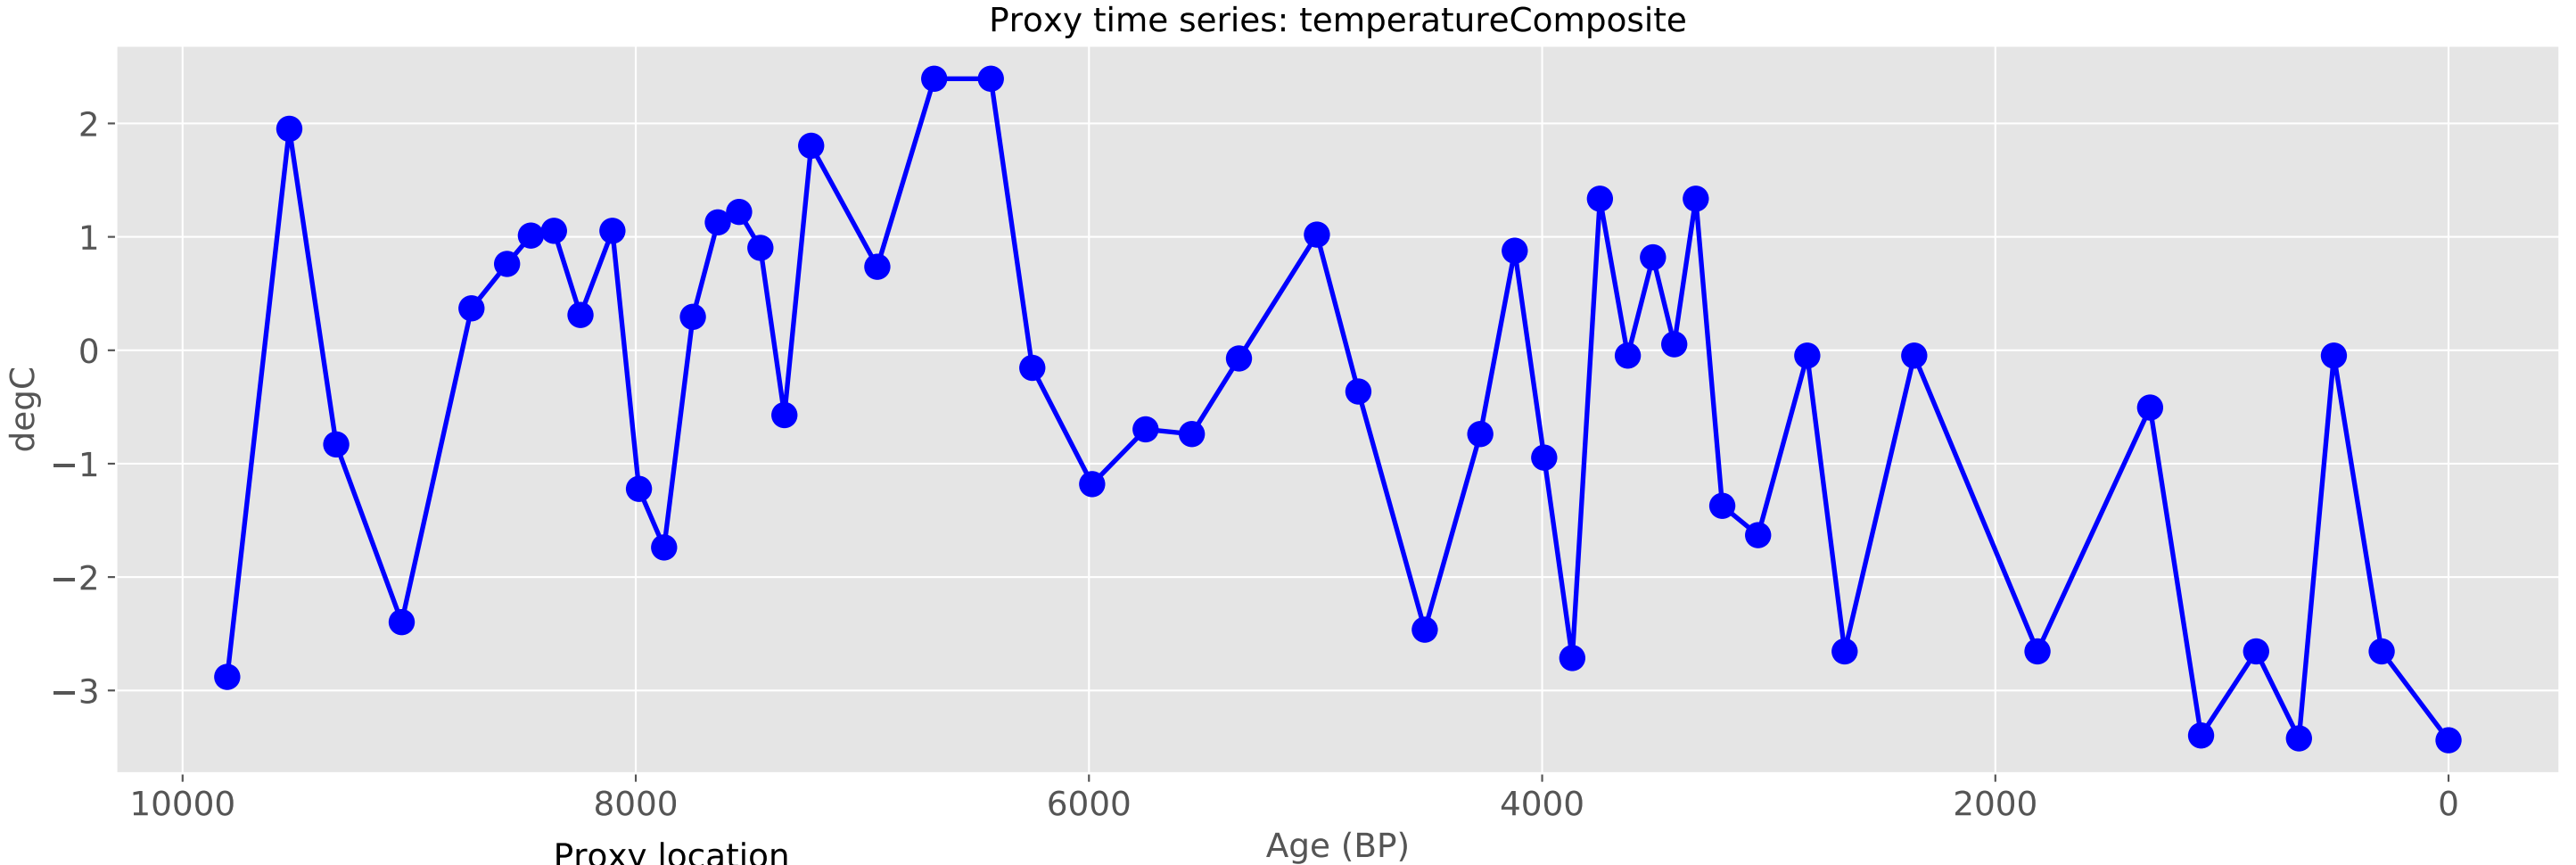

|                    |                                                       |
|--------------------|-------------------------------------------------------|
| Dataset name:      | Andy.Szeicz.1995                                      |
| Archive type:      | LakeSediment                                          |
| Proxy type:        | pollen                                                |
| Variable name:     | temperatureComposite                                  |
| Latitude ( ° N):   | 64.65                                                 |
| Longitude ( ° E):  | -128.08                                               |
| Elevation (m):     | 1360.0                                                |
| Interp. variable:  | T                                                     |
| Interp. detail:    | air@surface                                           |
| Interp. season:    | annual                                                |
| Interp. direction: | positive                                              |
| Pub. 1 title:      | Late Quaternary vegetation history of the central ... |
| Pub. 1 authors:    | Szeicz, Julian M.; MacDonald, Glen M.; Duk-Rodkin,... |
| Pub. 1 year:       | 1995                                                  |
| Pub. 1 DOI:        | 10.1016/0031-0182(95)00070-3                          |
| Original data URL: | www.ncdc.noaa.gov/paleo/study/15444                   |



Proxy data and metadata  
LakeSediment | pollen | Honeymoon.Cwynar.1991 | PYTN6TJY4W2

Proxy time series: temperature

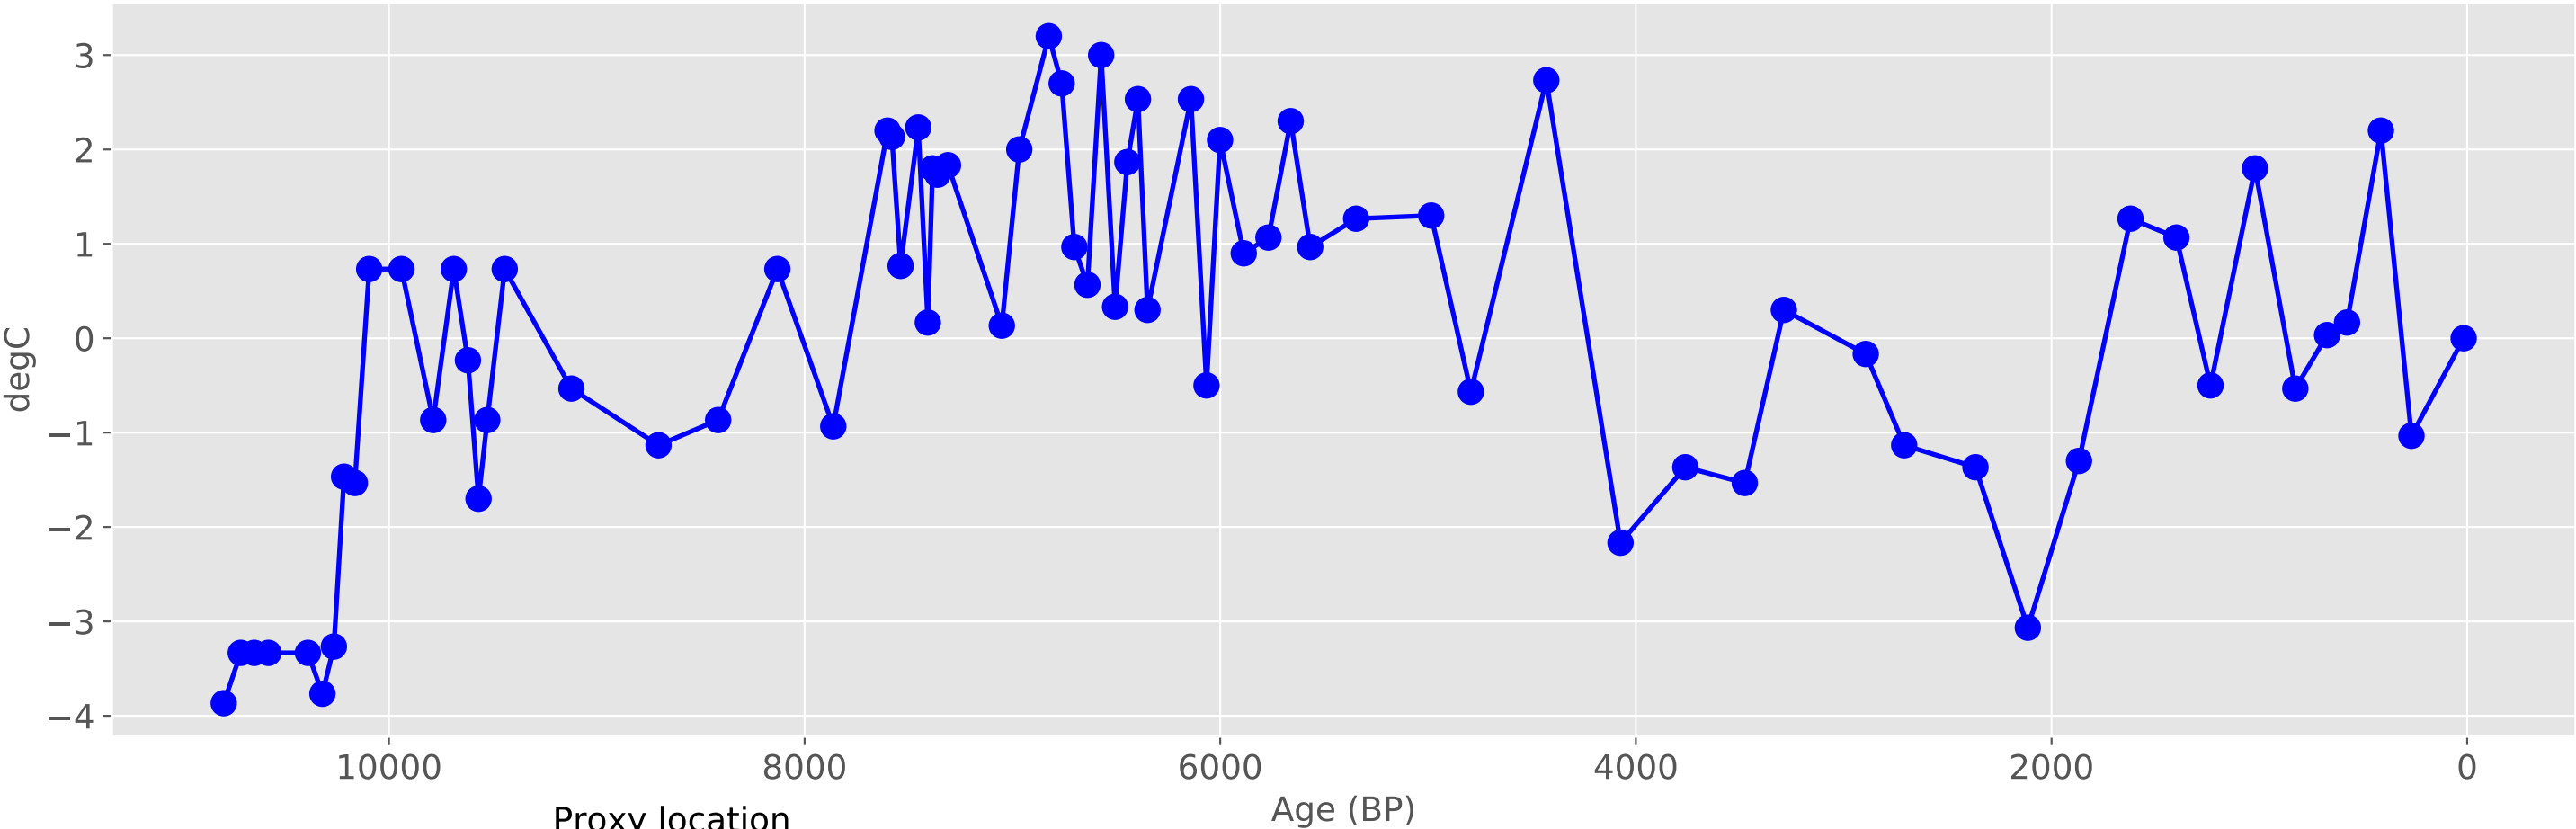

Proxy location  
(64.63 ° N, 138.40 ° W)

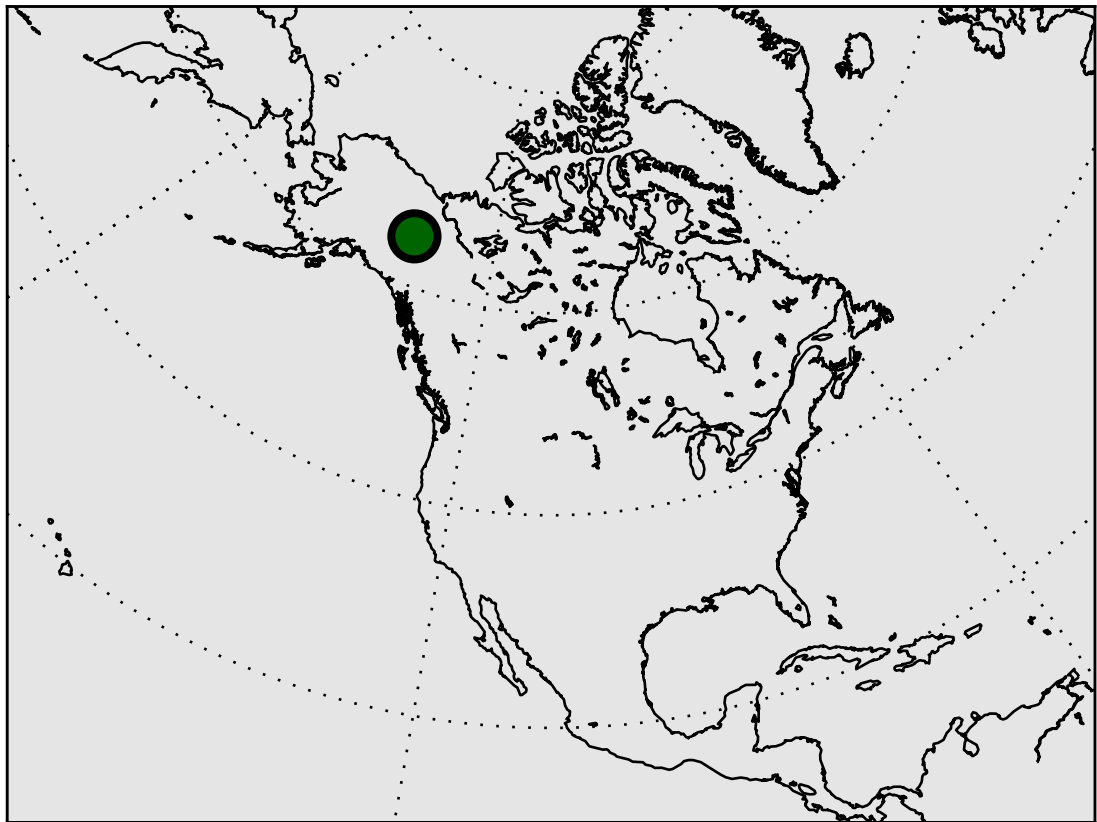

|                    |                                                    |
|--------------------|----------------------------------------------------|
| Dataset name:      | Honeymoon.Cwynar.1991                              |
| Archive type:      | LakeSediment                                       |
| Proxy type:        | pollen                                             |
| Variable name:     | temperature                                        |
| Latitude ( ° N):   | 64.63                                              |
| Longitude ( ° E):  | -138.4                                             |
| Elevation (m):     | 1160.0                                             |
| Interp. variable:  | T                                                  |
| Interp. detail:    | air@surface                                        |
| Interp. season:    | winter+                                            |
| Interp. direction: | positive                                           |
| Pub. 1 title:      | Reversion of forest to tundra in the central Yukon |
| Pub. 1 authors:    | Cwynar, Les C.; Spear, Ray W.                      |
| Pub. 1 year:       | 1991                                               |
| Pub. 1 DOI:        | 10.2307/1938915                                    |
| Original data URL: | 10.21233/N33Q7V                                    |

Proxy data and metadata  
**LakeSediment | pollen | Honeymoon.Cwynar.1991 | PYTTN37MLUC**

Proxy time series: precipitation

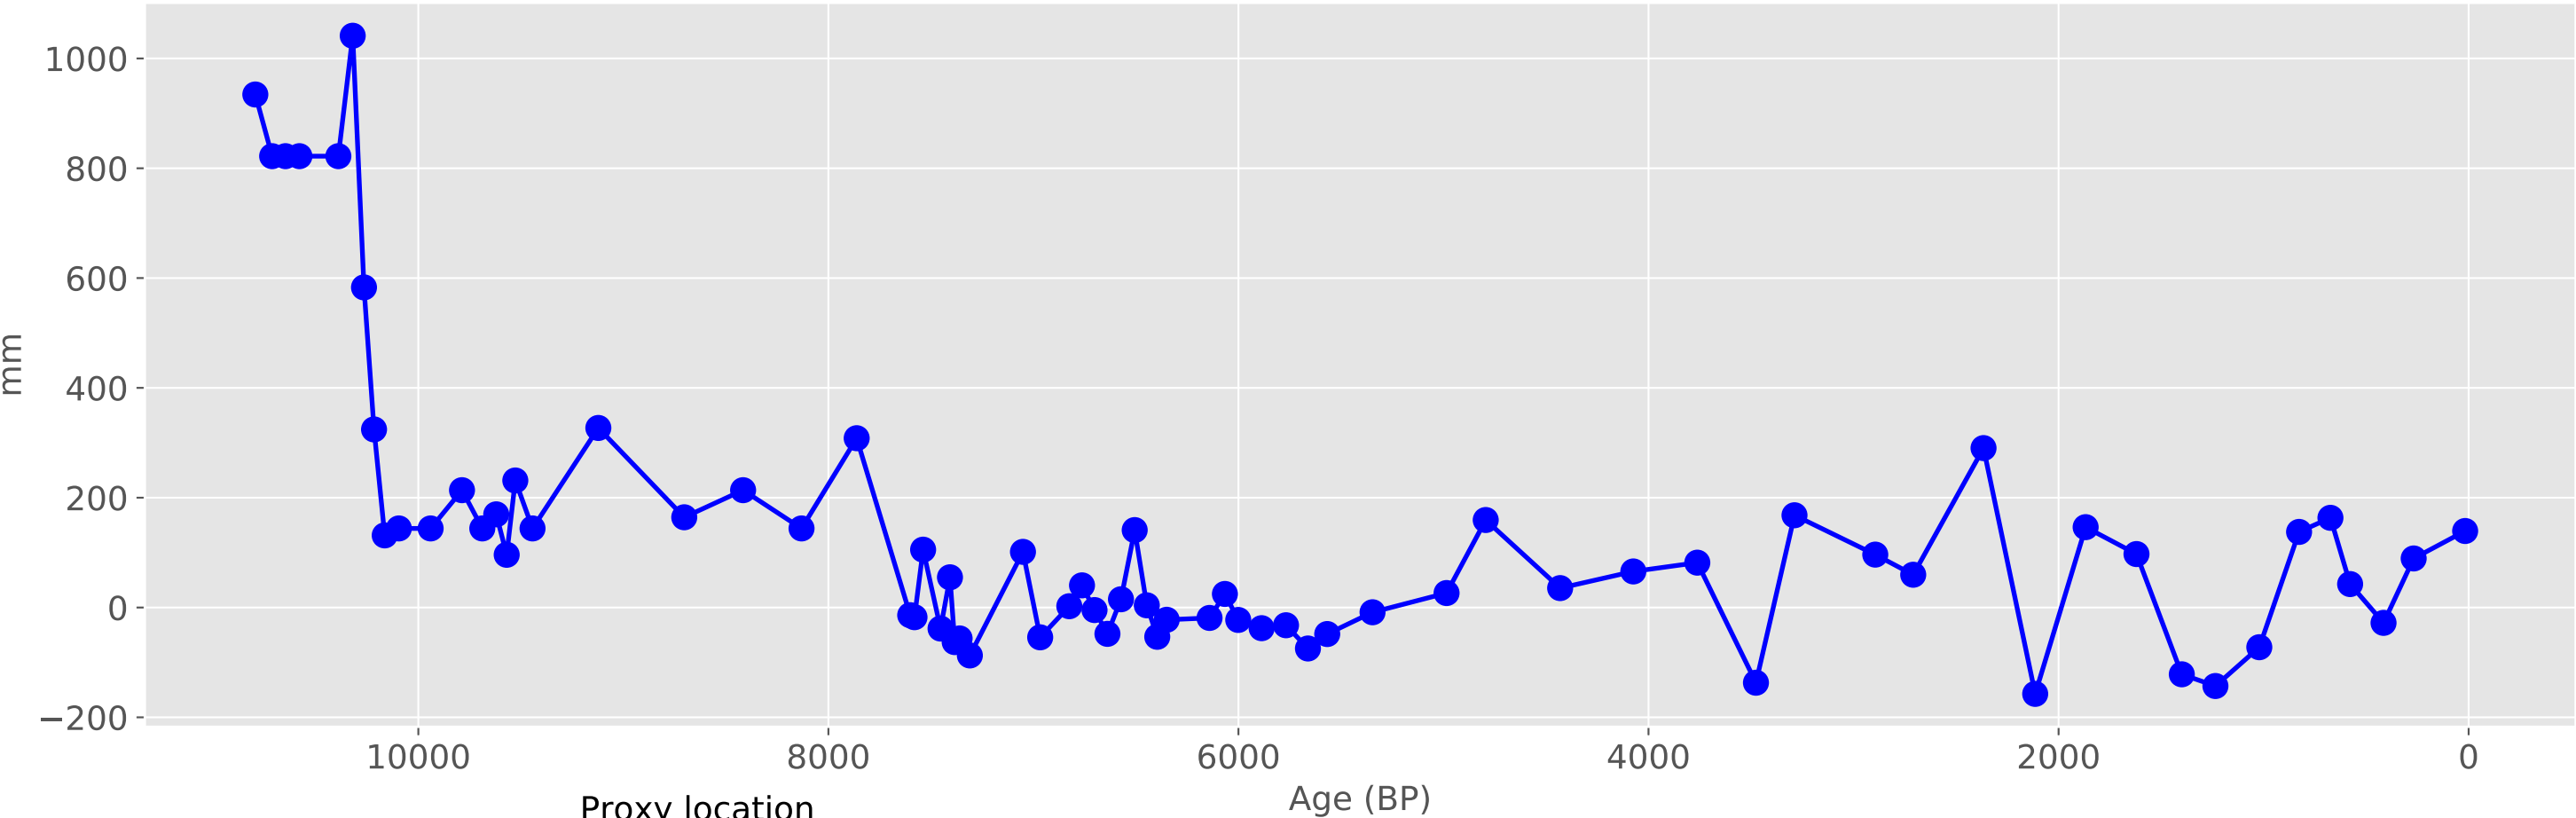

Proxy location  
(64.63 ° N, 138.40 ° W)



|                    |                                                    |
|--------------------|----------------------------------------------------|
| Dataset name:      | Honeymoon.Cwynar.1991                              |
| Archive type:      | LakeSediment                                       |
| Proxy type:        | pollen                                             |
| Variable name:     | precipitation                                      |
| Latitude ( ° N):   | 64.63                                              |
| Longitude ( ° E):  | -138.4                                             |
| Elevation (m):     | 1160.0                                             |
| Interp. variable:  | P                                                  |
| Interp. detail:    | amount@surface                                     |
| Interp. season:    | annual                                             |
| Interp. direction: | positive                                           |
| Pub. 1 title:      | Reversion of forest to tundra in the central Yukon |
| Pub. 1 authors:    | Cwynar, Les C.; Spear, Ray W.                      |
| Pub. 1 year:       | 1991                                               |
| Pub. 1 DOI:        | 10.2307/1938915                                    |
| Original data URL: | 10.21233/N33Q7V                                    |

Proxy data and metadata  
**LakeSediment | pollen | Honeymoon.Cwynar.1991 | RIINg5PrONi**

Proxy time series: temperatureComposite

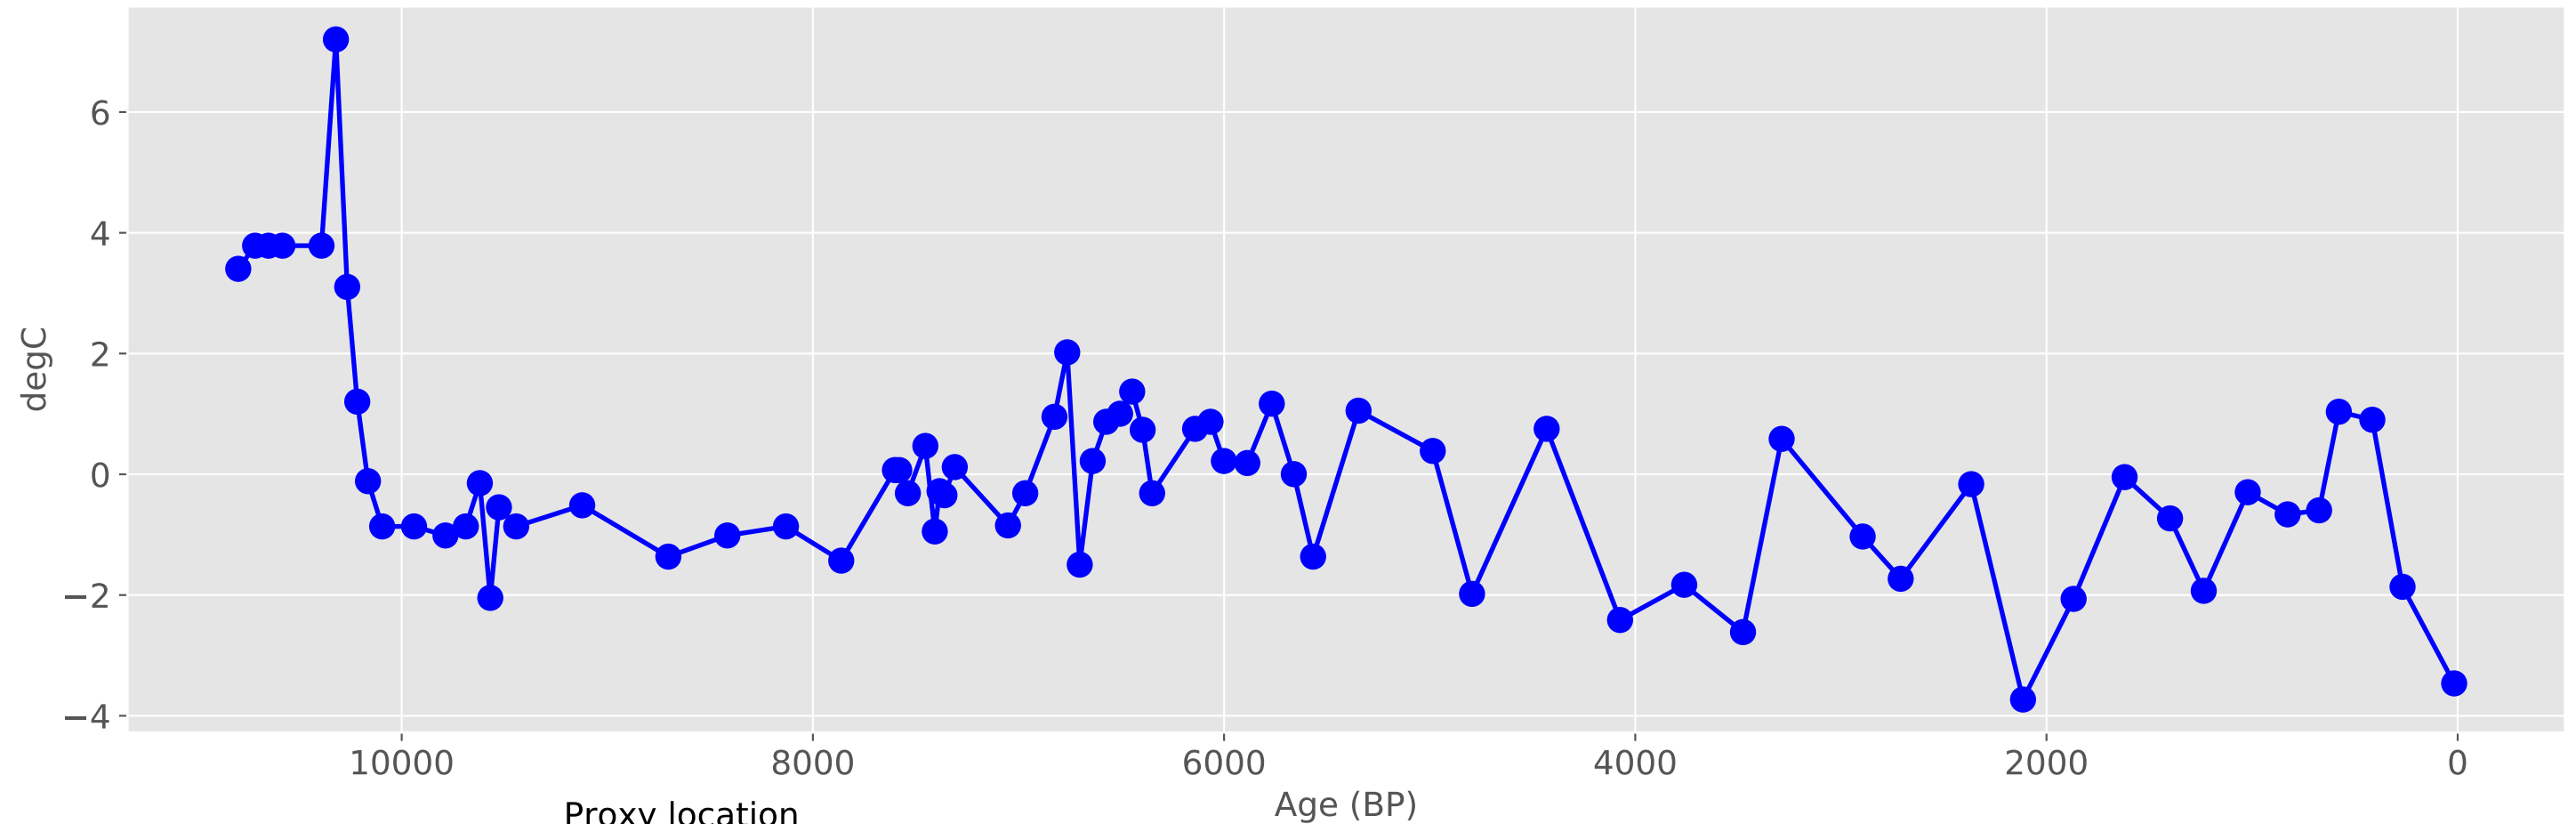

Proxy location  
(64.63 ° N, 138.40 ° W)

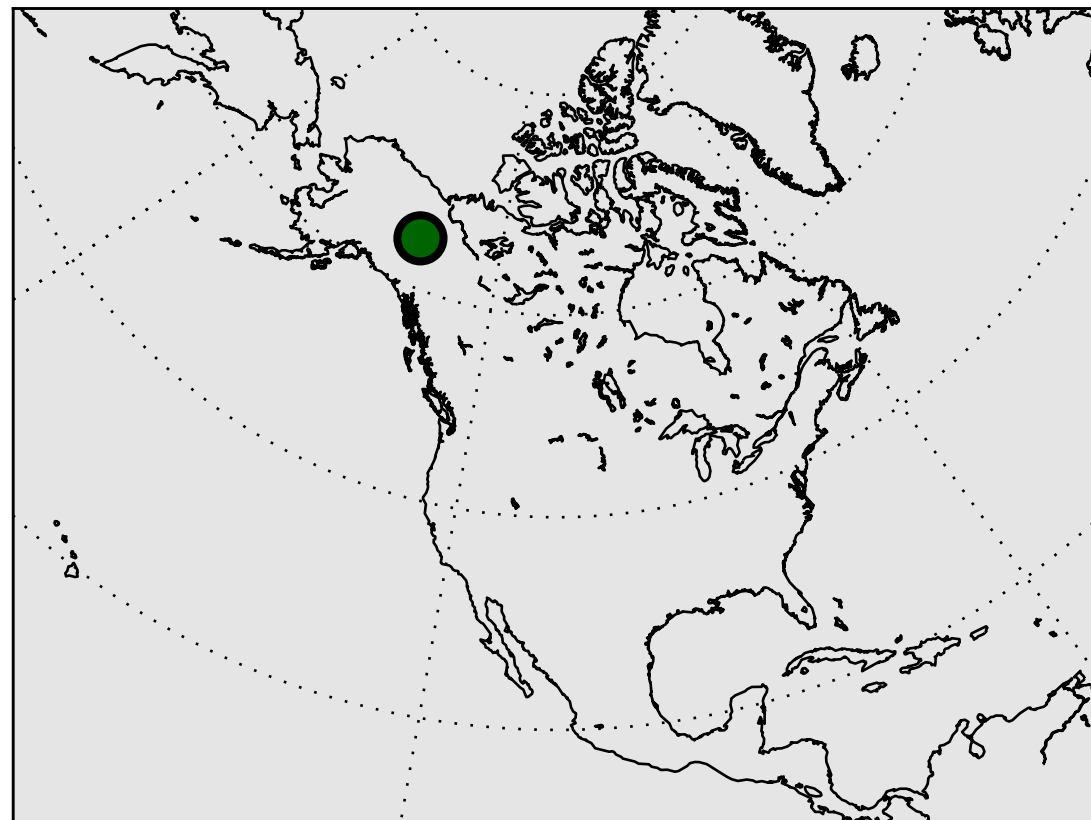

|                    |                                                    |
|--------------------|----------------------------------------------------|
| Dataset name:      | Honeymoon.Cwynar.1991                              |
| Archive type:      | LakeSediment                                       |
| Proxy type:        | pollen                                             |
| Variable name:     | temperatureComposite                               |
| Latitude ( ° N):   | 64.63                                              |
| Longitude ( ° E):  | -138.4                                             |
| Elevation (m):     | 1160.0                                             |
| Interp. variable:  | T                                                  |
| Interp. detail:    | air@surface                                        |
| Interp. season:    | annual                                             |
| Interp. direction: | positive                                           |
| Pub. 1 title:      | Reversion of forest to tundra in the central Yukon |
| Pub. 1 authors:    | Cwynar, Les C.; Spear, Ray W.                      |
| Pub. 1 year:       | 1991                                               |
| Pub. 1 DOI:        | 10.2307/1938915                                    |
| Original data URL: | 10.21233/N33Q7V                                    |

Proxy data and metadata

LakeSediment | pollen | Honeymoon.Cwynar.1991 | WEB19eac4d9

Proxy time series: temperature

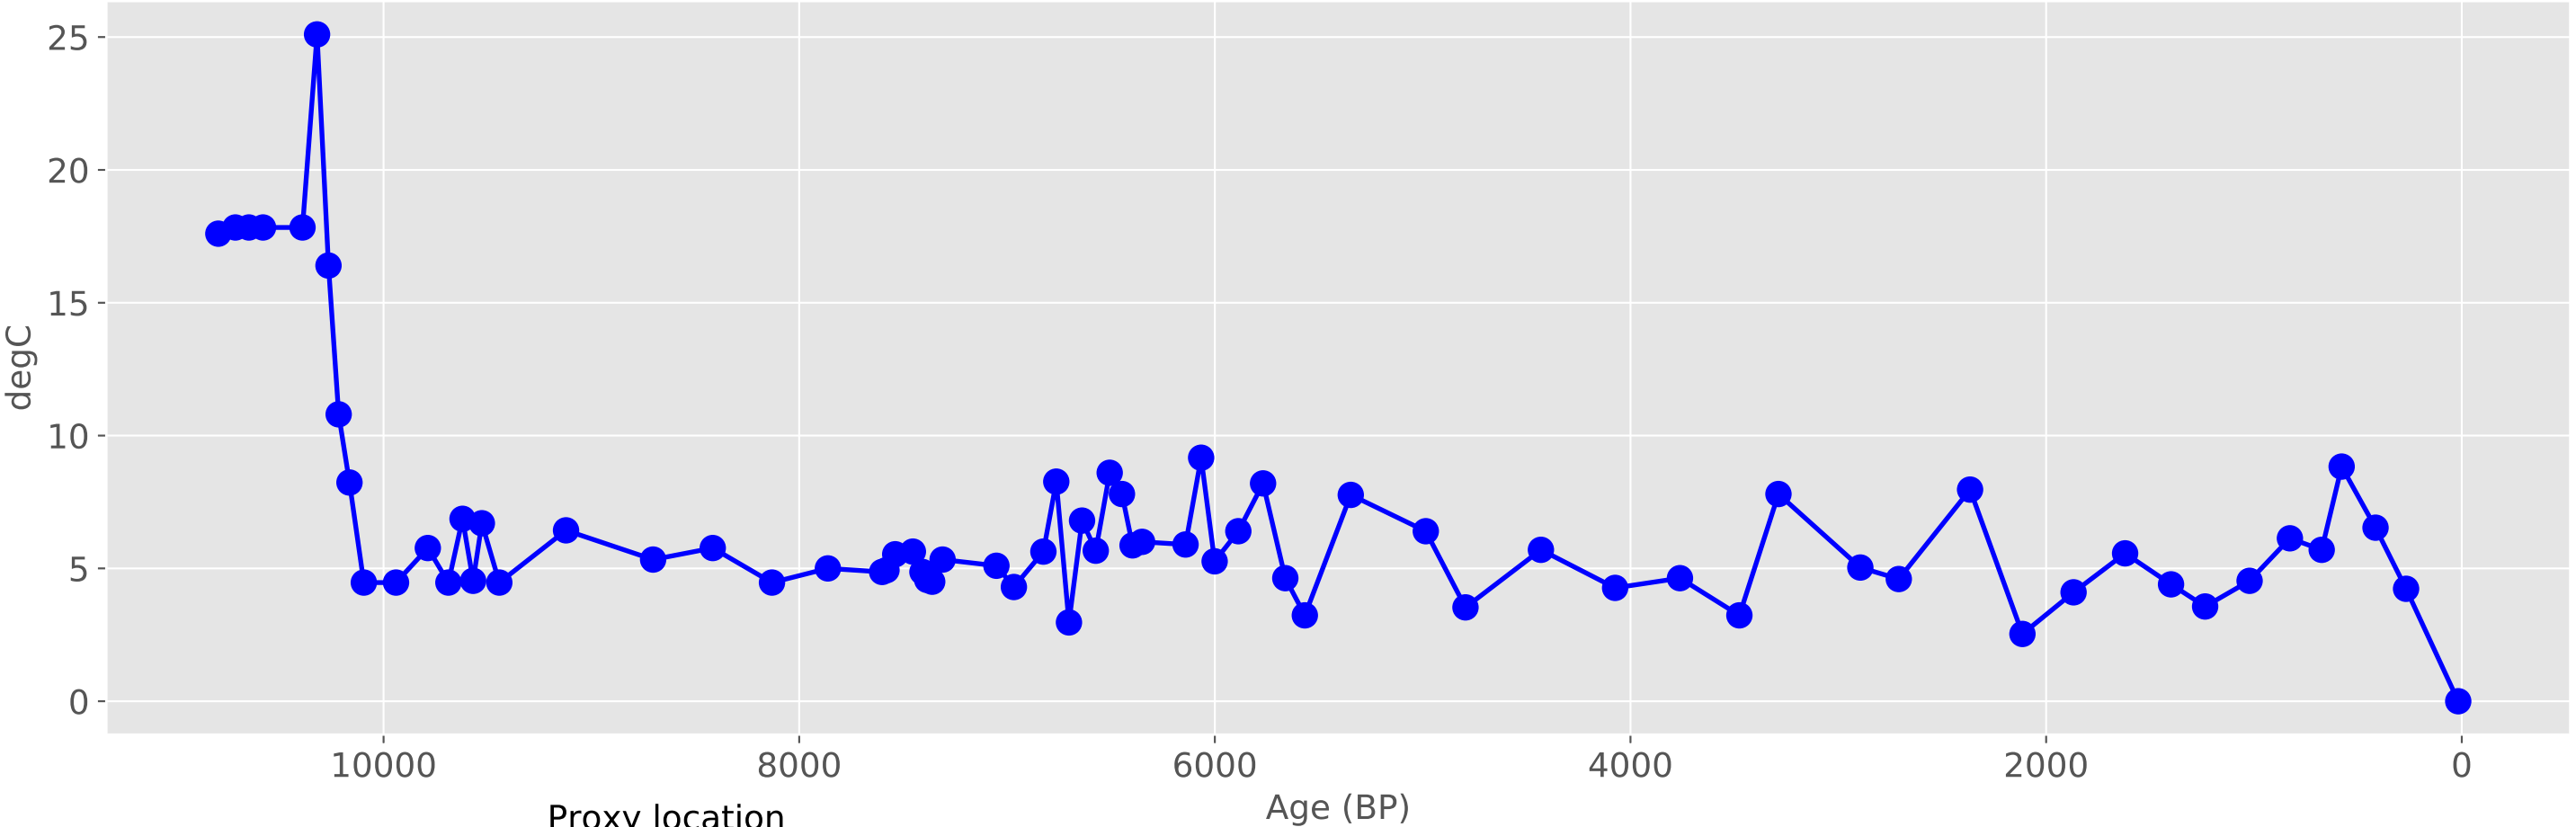

Proxy location  
(64.63 ° N, 138.40 ° W)

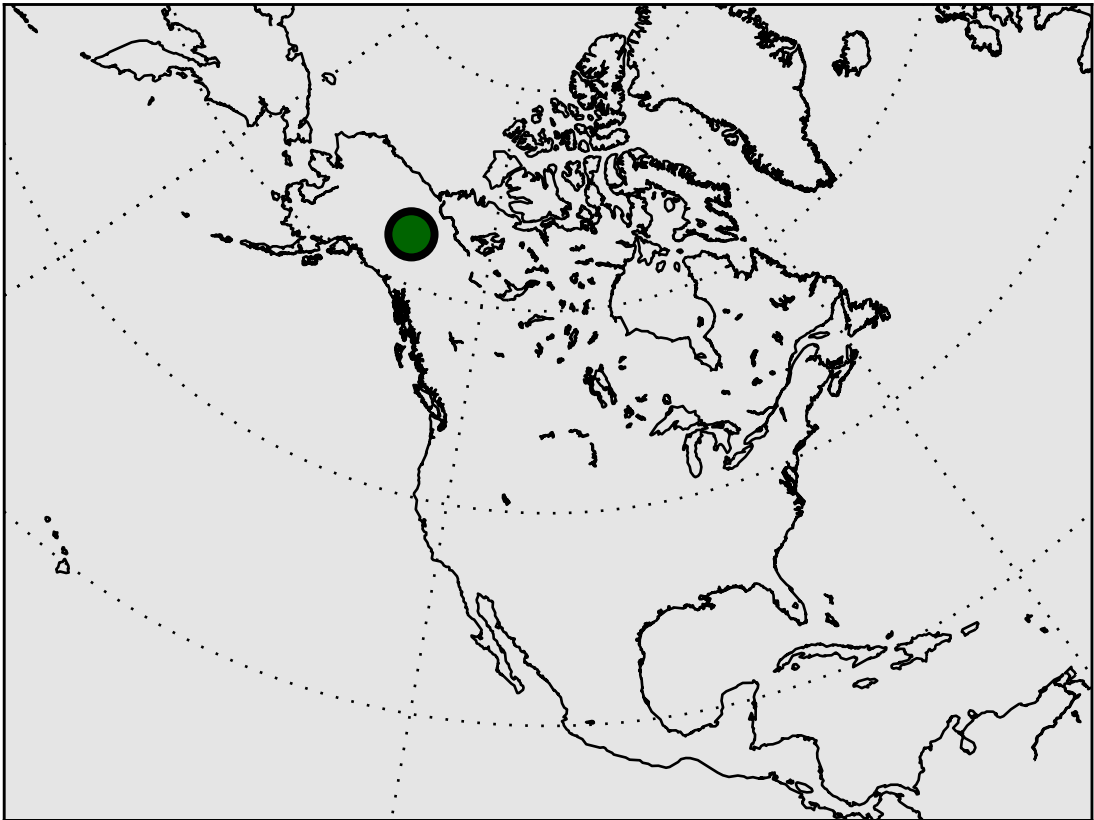

|                    |                                                    |
|--------------------|----------------------------------------------------|
| Dataset name:      | Honeymoon.Cwynar.1991                              |
| Archive type:      | LakeSediment                                       |
| Proxy type:        | pollen                                             |
| Variable name:     | temperature                                        |
| Latitude ( ° N):   | 64.63                                              |
| Longitude ( ° E):  | -138.4                                             |
| Elevation (m):     | 1160.0                                             |
| Interp. variable:  | T                                                  |
| Interp. detail:    | air@surface                                        |
| Interp. season:    | summer+                                            |
| Interp. direction: | positive                                           |
| Pub. 1 title:      | Reversion of forest to tundra in the central Yukon |
| Pub. 1 authors:    | Cwynar, Les C.; Spear, Ray W.                      |
| Pub. 1 year:       | 1991                                               |
| Pub. 1 DOI:        | 10.2307/1938915                                    |
| Original data URL: | 10.21233/N33Q7V                                    |

Proxy data and metadata  
LakeSediment | pollen | Keele.Szeicz.1995 | M2L0bknlm1hP

Proxy time series: temperature

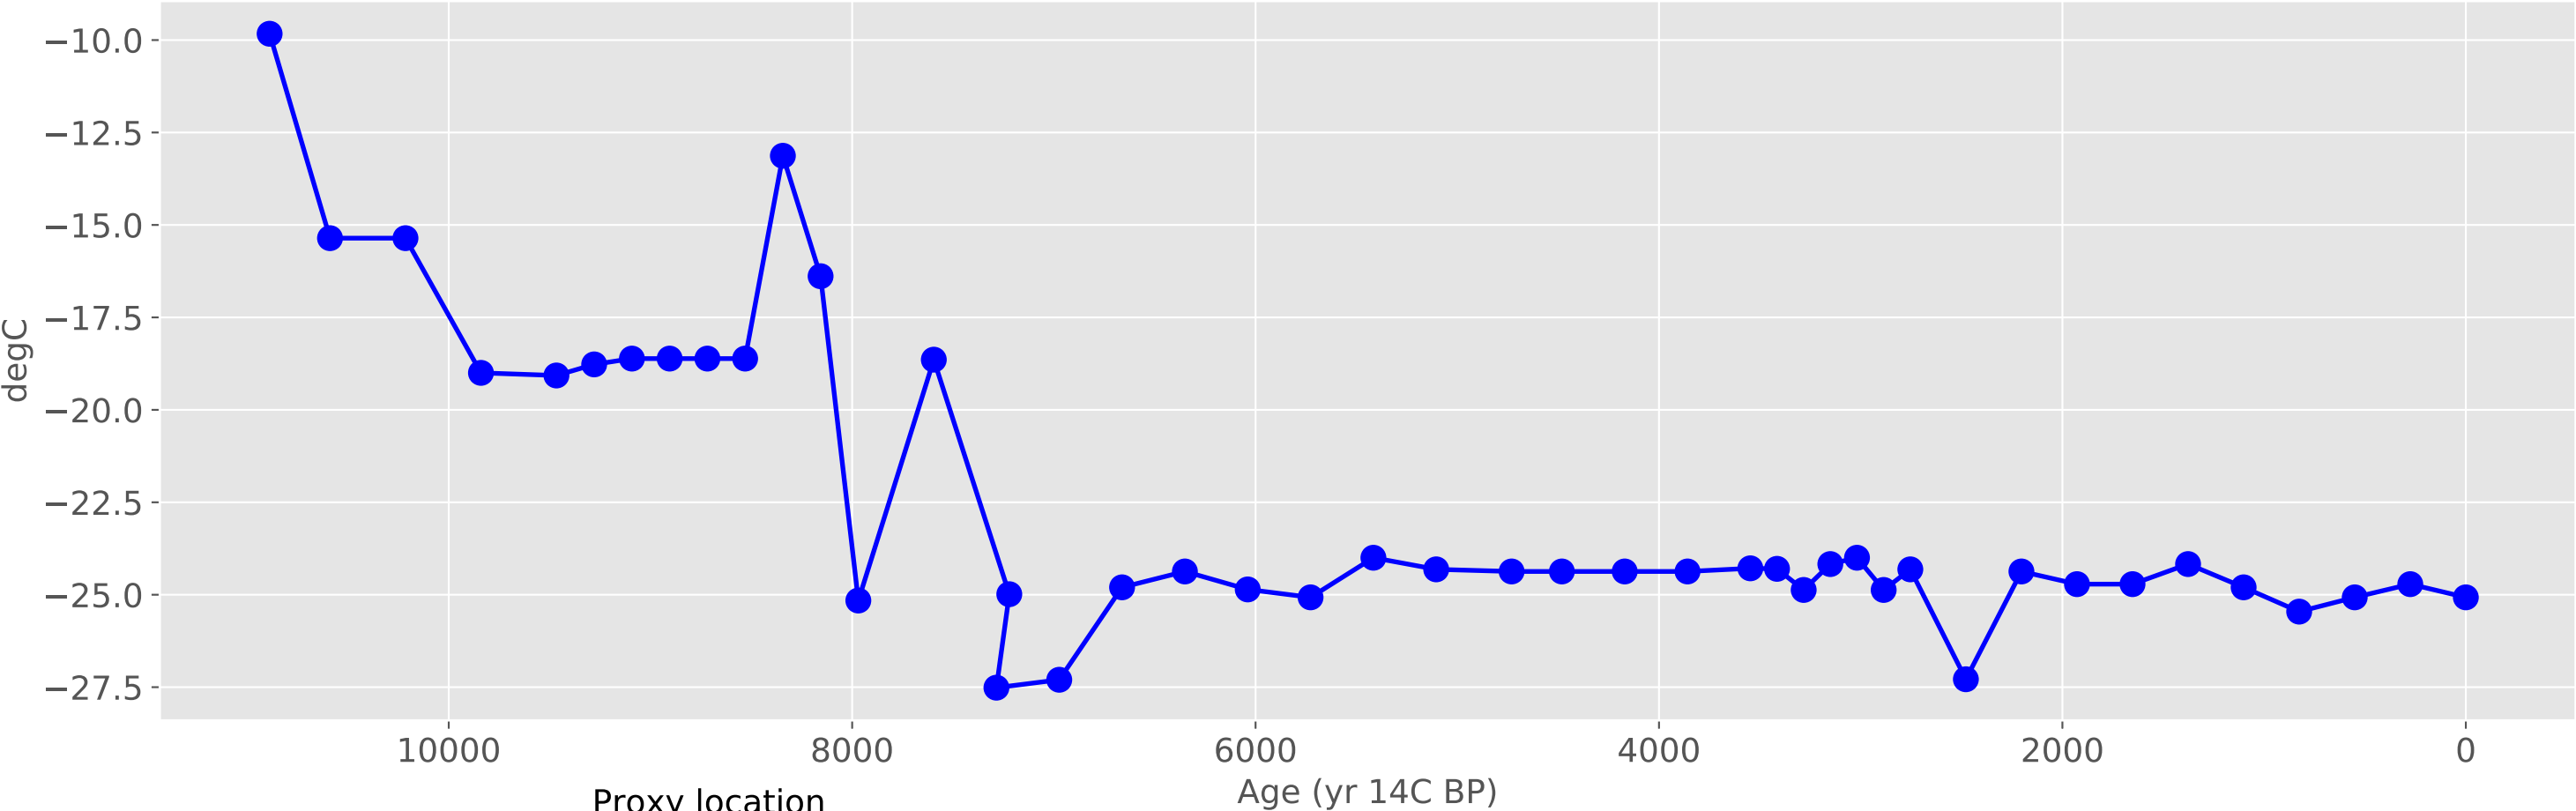

Proxy location  
(64.17° N, 127.62° W)

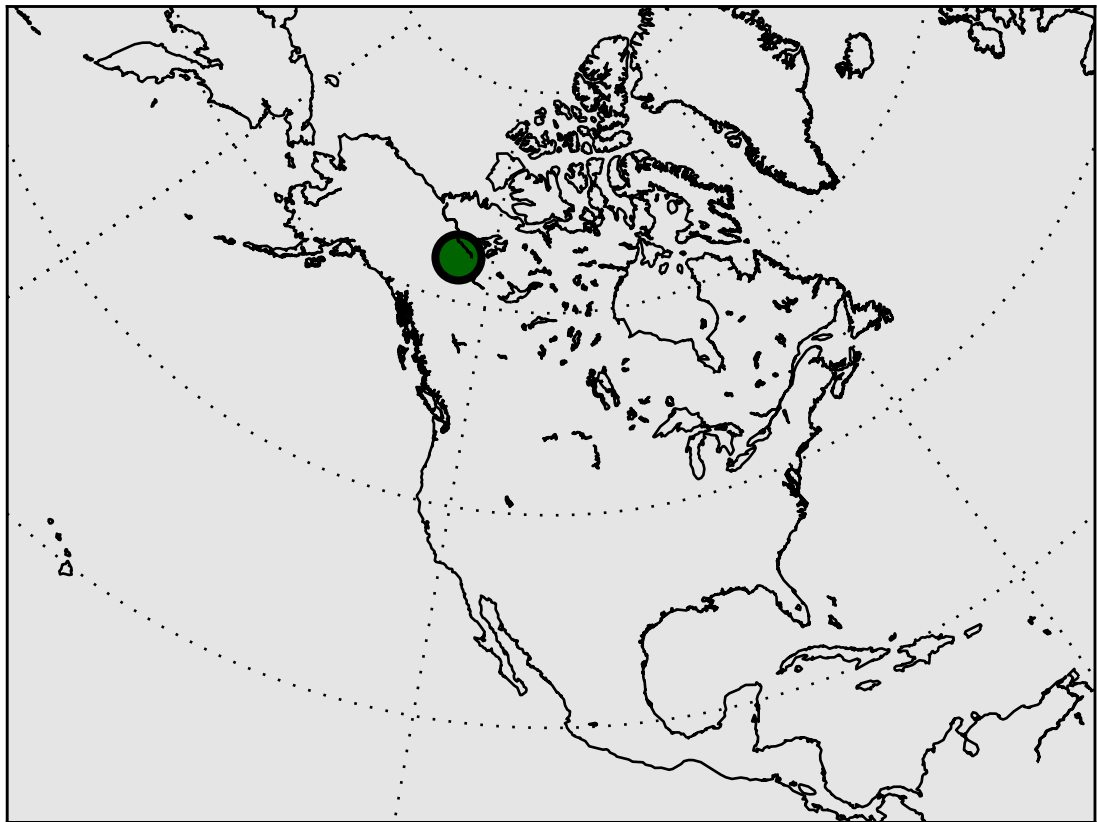

|                    |                                                       |
|--------------------|-------------------------------------------------------|
| Dataset name:      | Keele.Szeicz.1995                                     |
| Archive type:      | LakeSediment                                          |
| Proxy type:        | pollen                                                |
| Variable name:     | temperature                                           |
| Latitude (° N):    | 64.17                                                 |
| Longitude (° E):   | -127.62                                               |
| Elevation (m):     | 1150.0                                                |
| Interp. variable:  | T                                                     |
| Interp. detail:    | air@surface                                           |
| Interp. season:    | winter+                                               |
| Interp. direction: | positive                                              |
| Pub. 1 title:      | Late Quaternary vegetation history of the central ... |
| Pub. 1 authors:    | Szeicz, Julian M.; MacDonald, Glen M.; Duk-Rodkin,... |
| Pub. 1 year:       | 1995                                                  |
| Pub. 1 DOI:        | 10.1016/0031-0182(95)00070-3                          |
| Original data URL: | www.ncdc.noaa.gov/paleo/study/27330                   |

Proxy data and metadata  
LakeSediment | pollen | Keele.Szeicz.1995 | M2Lhapfah89P

Proxy time series: temperature

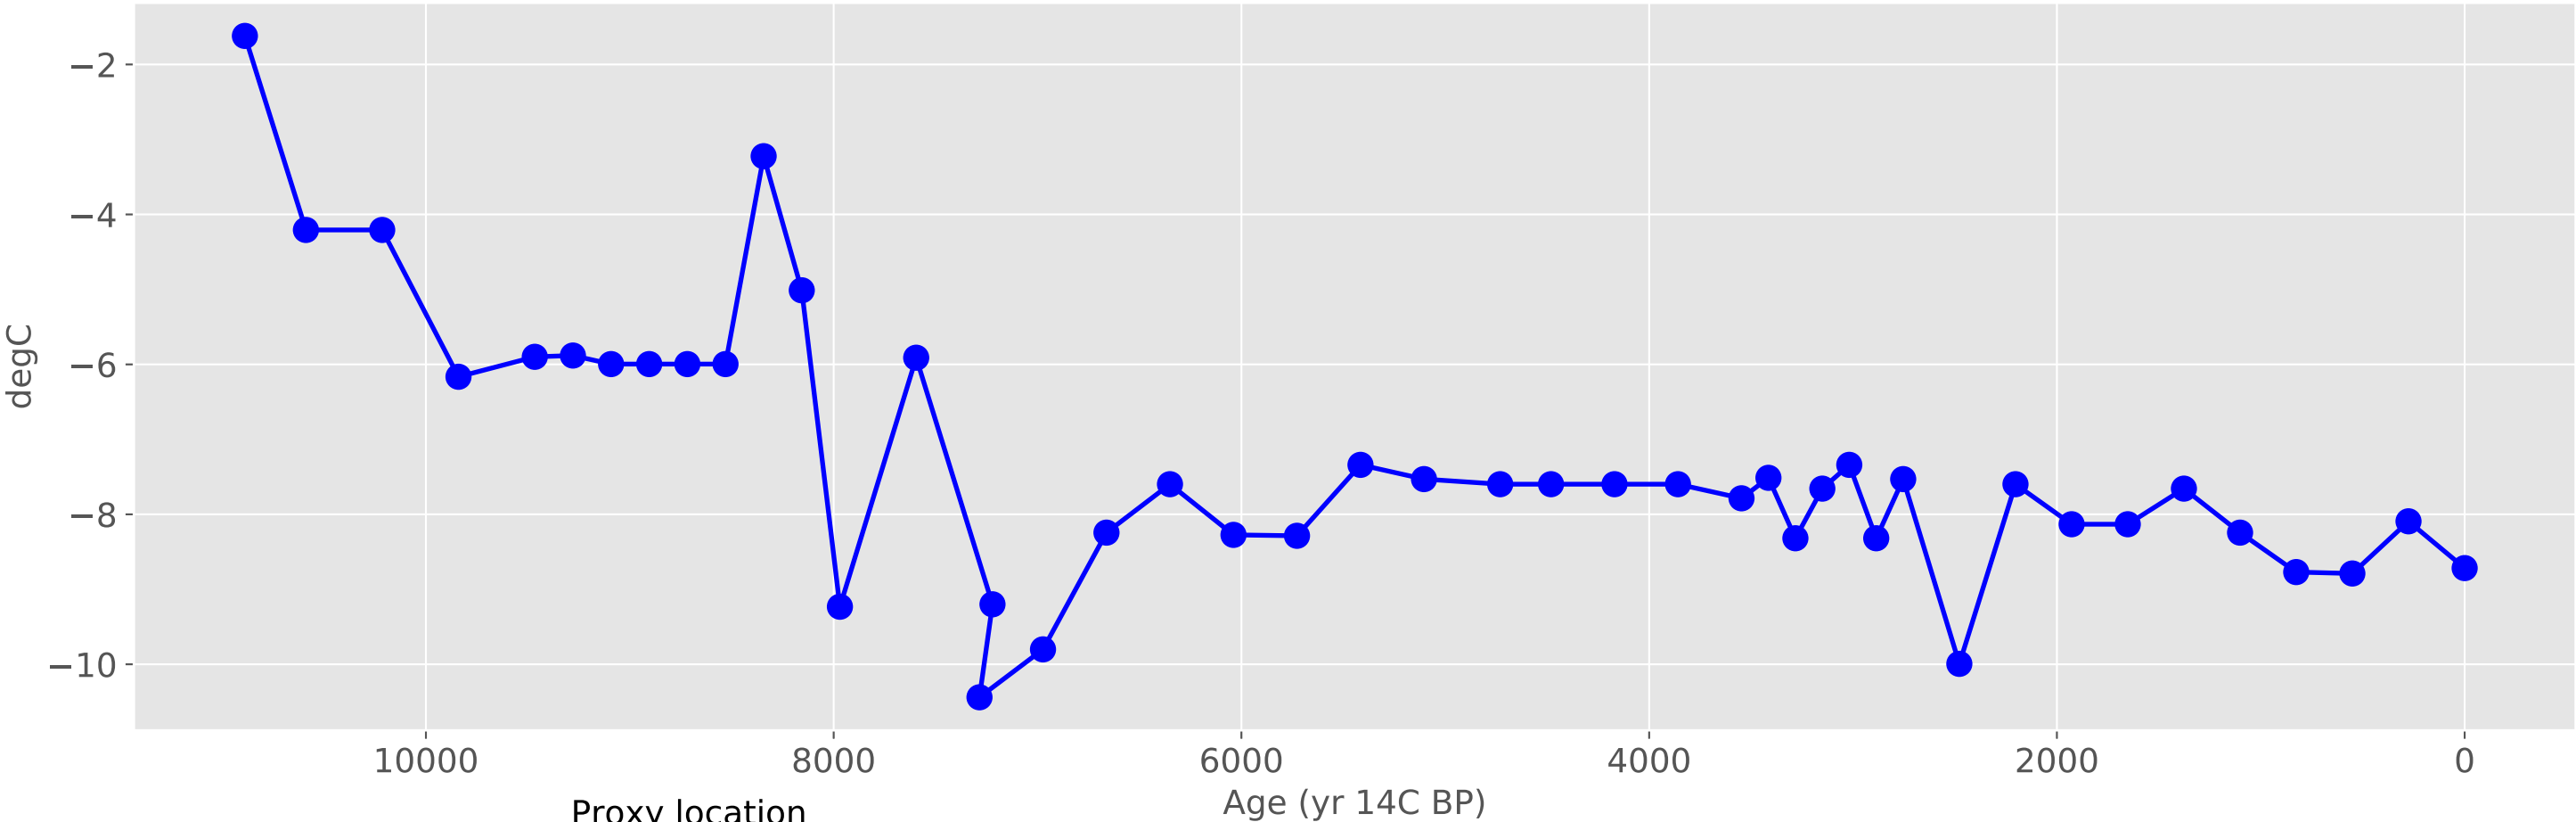

Proxy location  
(64.17° N, 127.62° W)

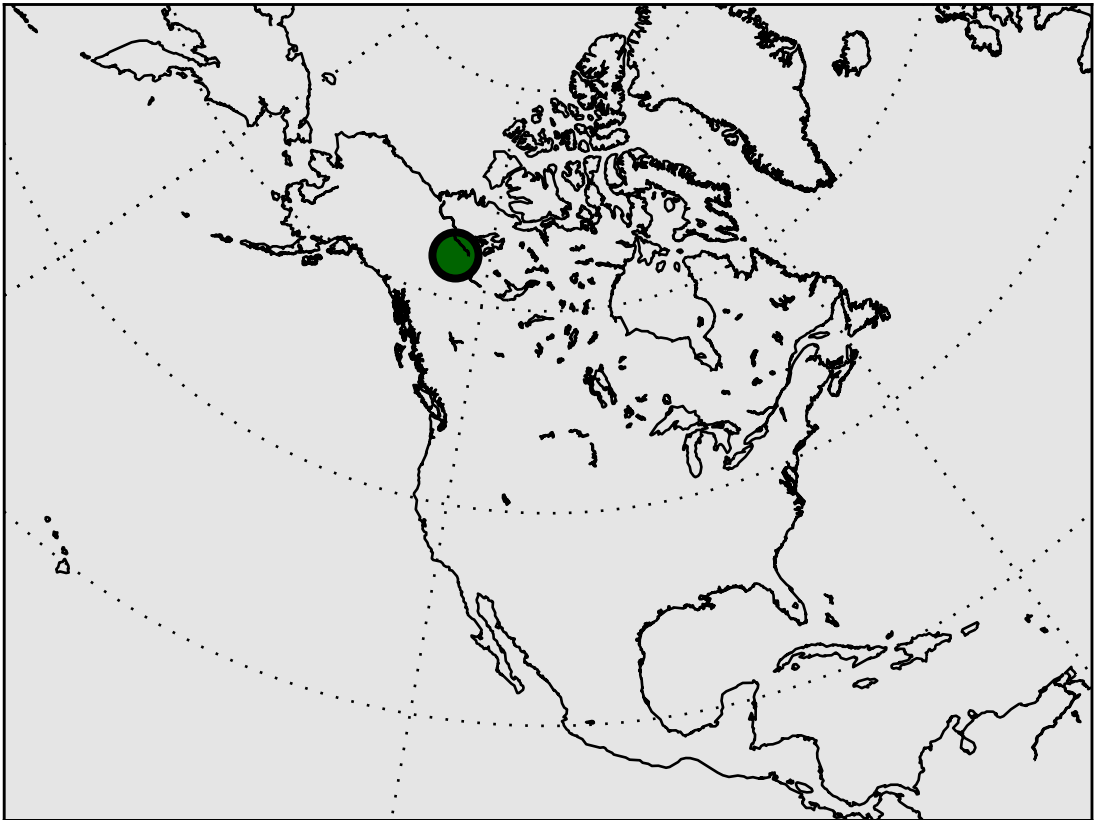

|                    |                                                       |
|--------------------|-------------------------------------------------------|
| Dataset name:      | Keele.Szeicz.1995                                     |
| Archive type:      | LakeSediment                                          |
| Proxy type:        | pollen                                                |
| Variable name:     | temperature                                           |
| Latitude (° N):    | 64.17                                                 |
| Longitude (° E):   | -127.62                                               |
| Elevation (m):     | 1150.0                                                |
| Interp. variable:  | T                                                     |
| Interp. detail:    | air@surface                                           |
| Interp. season:    | annual                                                |
| Interp. direction: | positive                                              |
| Pub. 1 title:      | Late Quaternary vegetation history of the central ... |
| Pub. 1 authors:    | Szeicz, Julian M.; MacDonald, Glen M.; Duk-Rodkin,... |
| Pub. 1 year:       | 1995                                                  |
| Pub. 1 DOI:        | 10.1016/0031-0182(95)00070-3                          |
| Original data URL: | www.ncdc.noaa.gov/paleo/study/27330                   |



Proxy data and metadata  
LakeSediment | pollen | Keele.Szeicz.1995 | M2Lqujf1ttdP

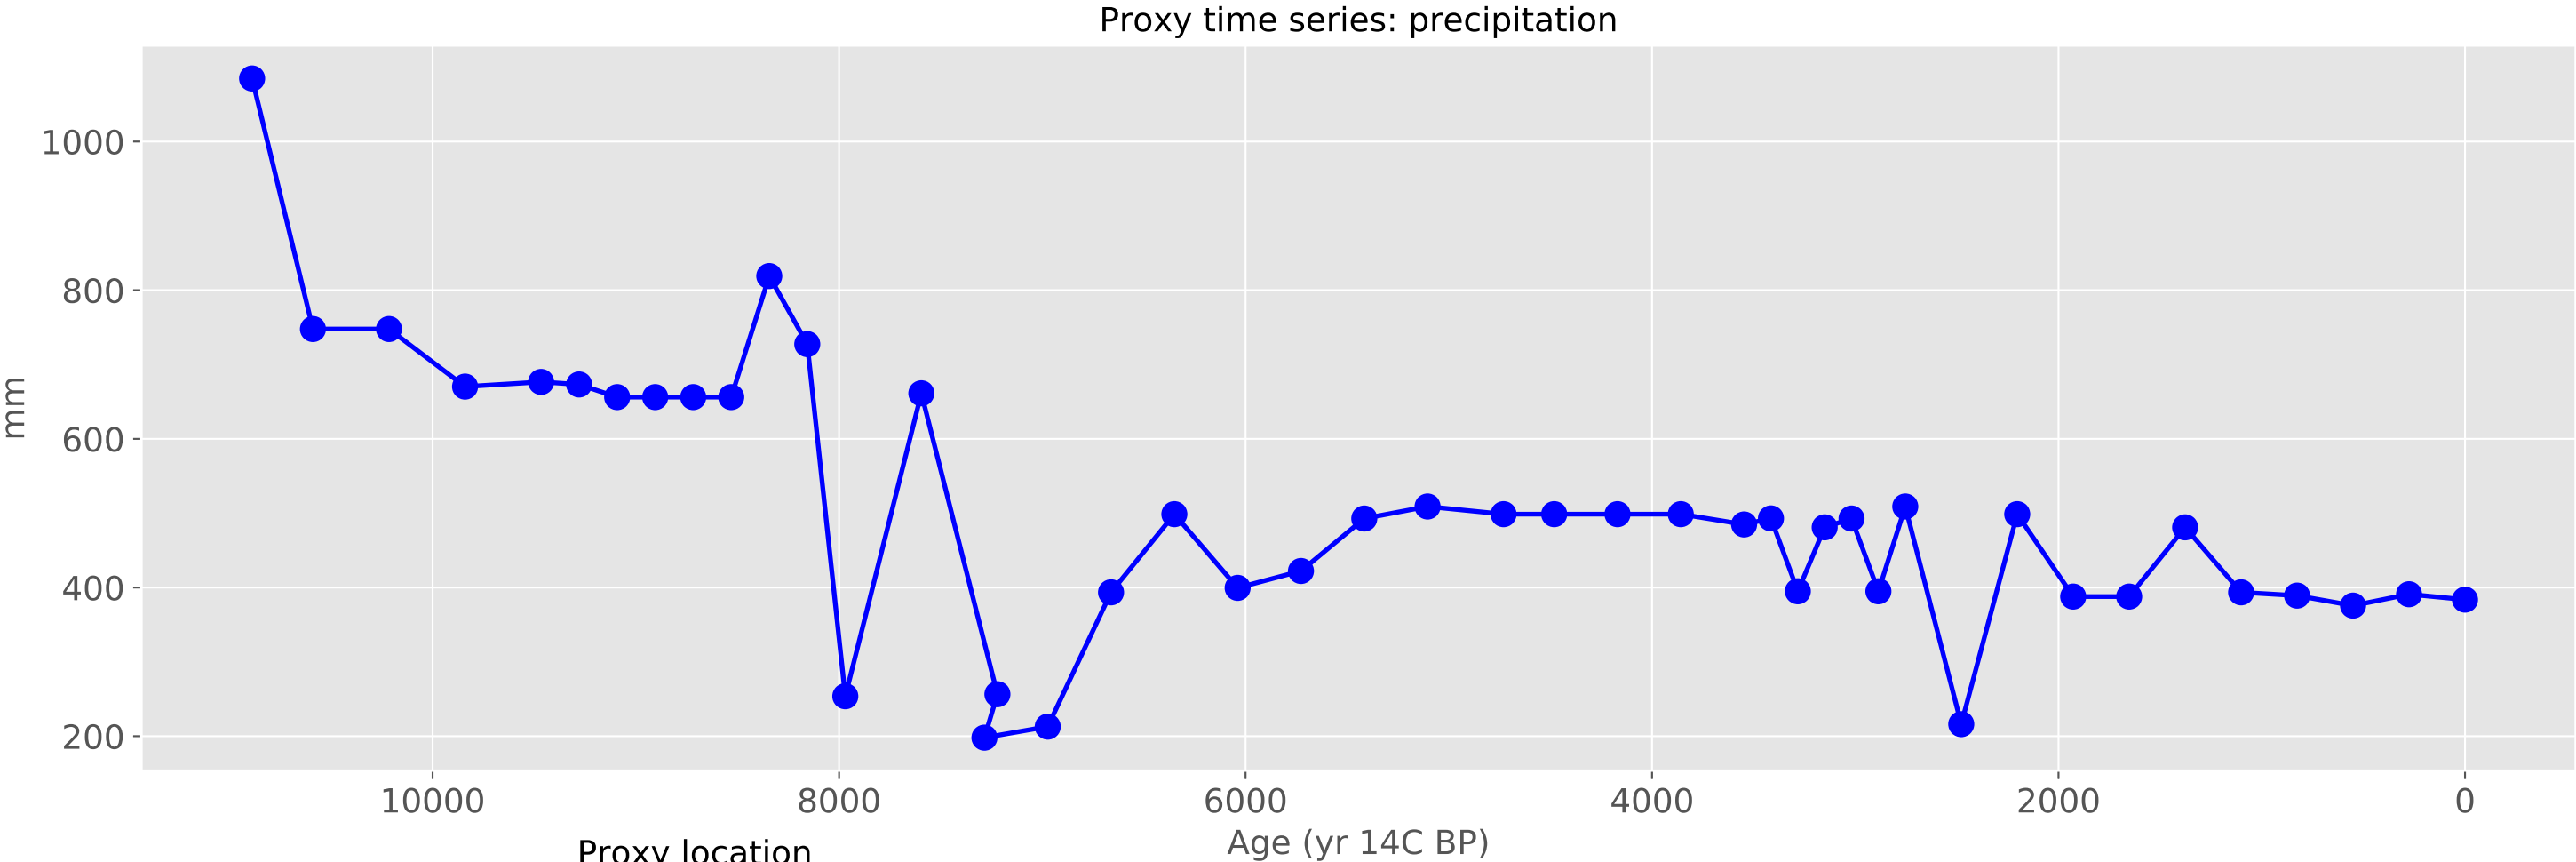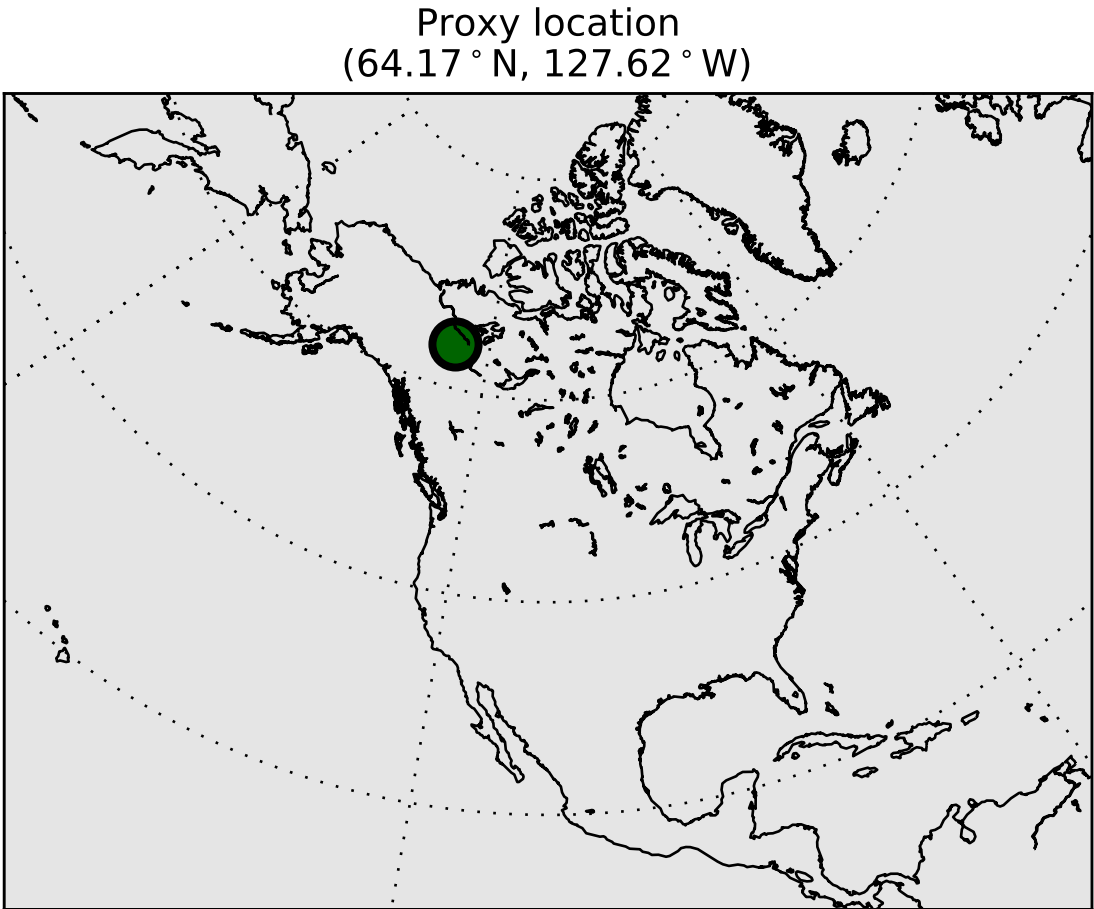

|                    |                                                       |
|--------------------|-------------------------------------------------------|
| Dataset name:      | Keele.Szeicz.1995                                     |
| Archive type:      | LakeSediment                                          |
| Proxy type:        | pollen                                                |
| Variable name:     | precipitation                                         |
| Latitude (° N):    | 64.17                                                 |
| Longitude (° E):   | -127.62                                               |
| Elevation (m):     | 1150.0                                                |
| Interp. variable:  | P                                                     |
| Interp. detail:    | amount@surface                                        |
| Interp. season:    | annual                                                |
| Interp. direction: | positive                                              |
| Pub. 1 title:      | Late Quaternary vegetation history of the central ... |
| Pub. 1 authors:    | Szeicz, Julian M.; MacDonald, Glen M.; Duk-Rodkin,... |
| Pub. 1 year:       | 1995                                                  |
| Pub. 1 DOI:        | 10.1016/0031-0182(95)00070-3                          |
| Original data URL: | www.ncdc.noaa.gov/paleo/study/27330                   |

Proxy data and metadata  
LakeSediment | pollen | Keele.Szeicz.1995 | M2Lut2rpqe2P

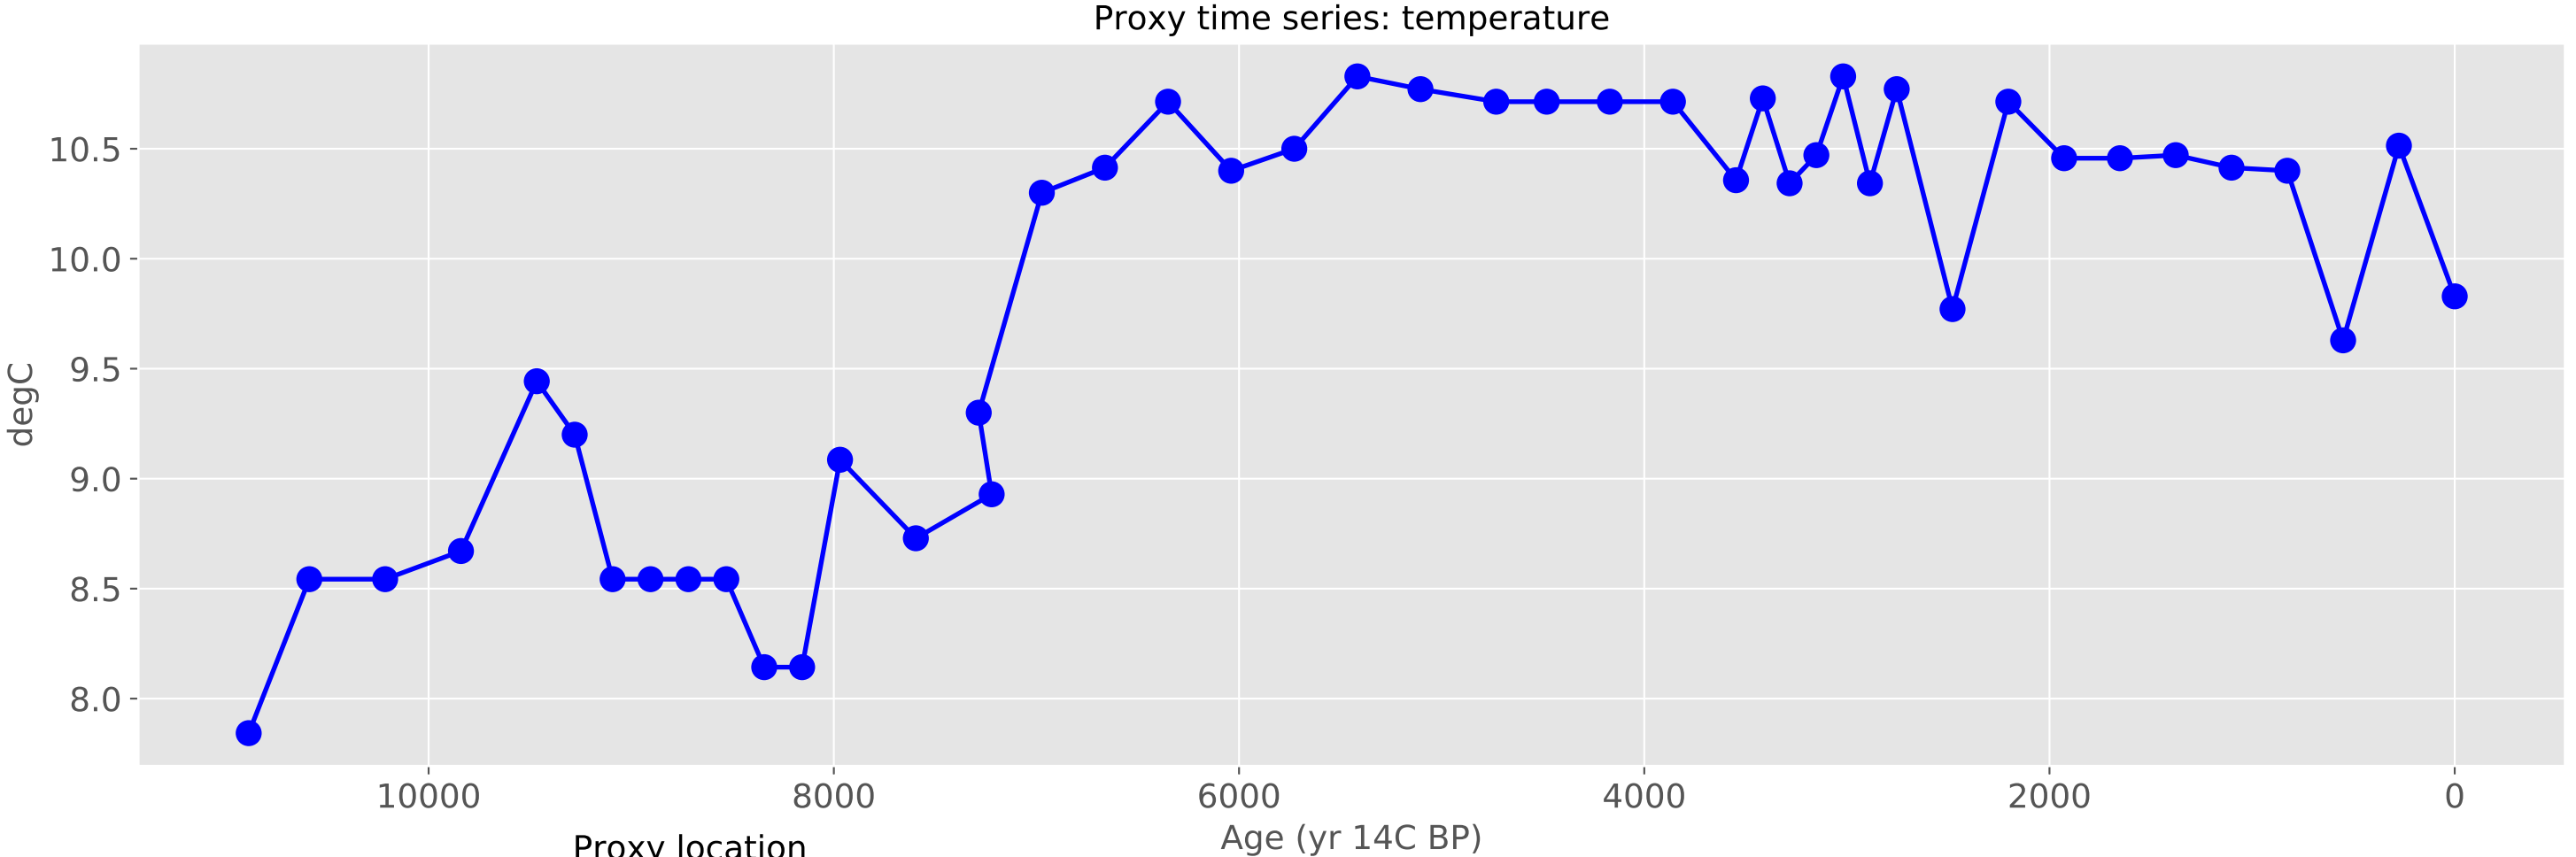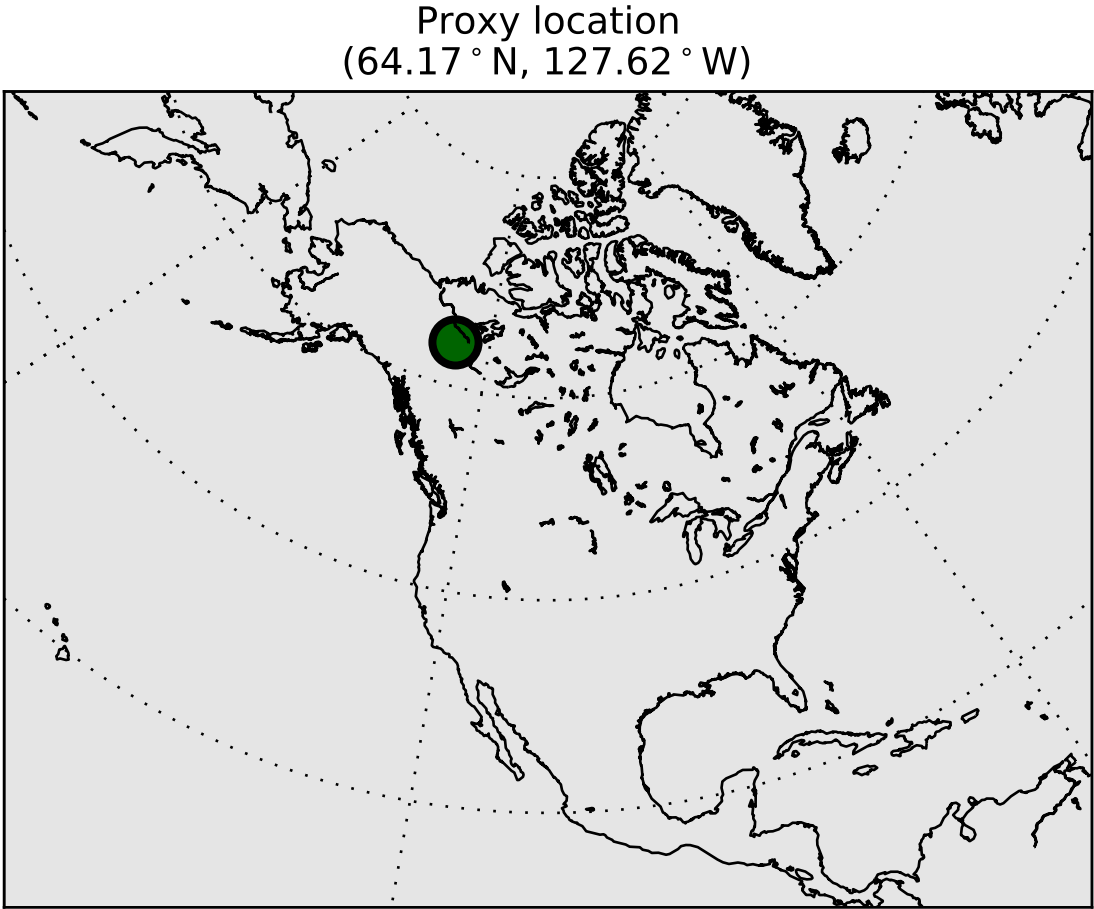

|                    |                                                       |
|--------------------|-------------------------------------------------------|
| Dataset name:      | Keele.Szeicz.1995                                     |
| Archive type:      | LakeSediment                                          |
| Proxy type:        | pollen                                                |
| Variable name:     | temperature                                           |
| Latitude (° N):    | 64.17                                                 |
| Longitude (° E):   | -127.62                                               |
| Elevation (m):     | 1150.0                                                |
| Interp. variable:  | T                                                     |
| Interp. detail:    | air@surface                                           |
| Interp. season:    | summer+                                               |
| Interp. direction: | positive                                              |
| Pub. 1 title:      | Late Quaternary vegetation history of the central ... |
| Pub. 1 authors:    | Szeicz, Julian M.; MacDonald, Glen M.; Duk-Rodkin,... |
| Pub. 1 year:       | 1995                                                  |
| Pub. 1 DOI:        | 10.1016/0031-0182(95)00070-3                          |
| Original data URL: | www.ncdc.noaa.gov/paleo/study/27330                   |

Proxy data and metadata  
LakeSediment | pollen | CandelabraLake.Cwynar.1995 | PYT17LJ7OZ8

Proxy time series: temperature

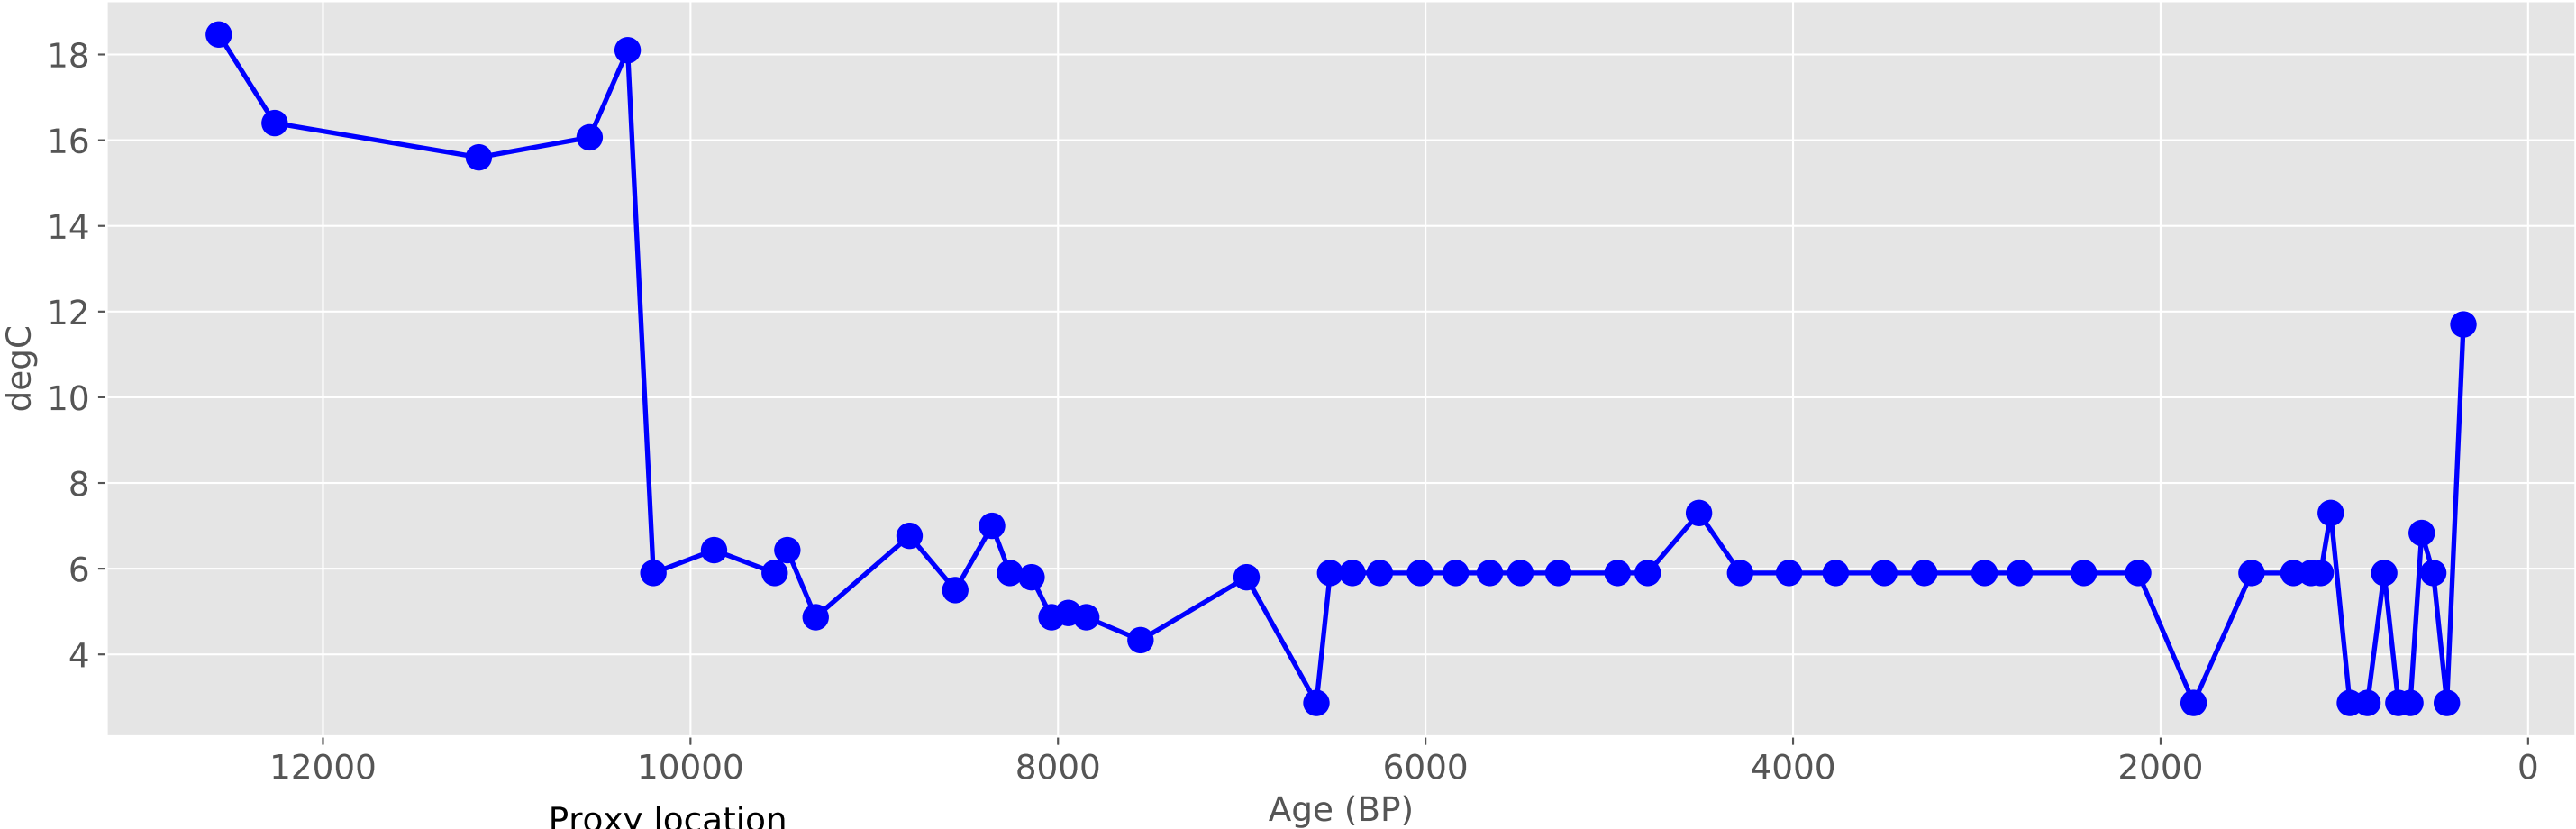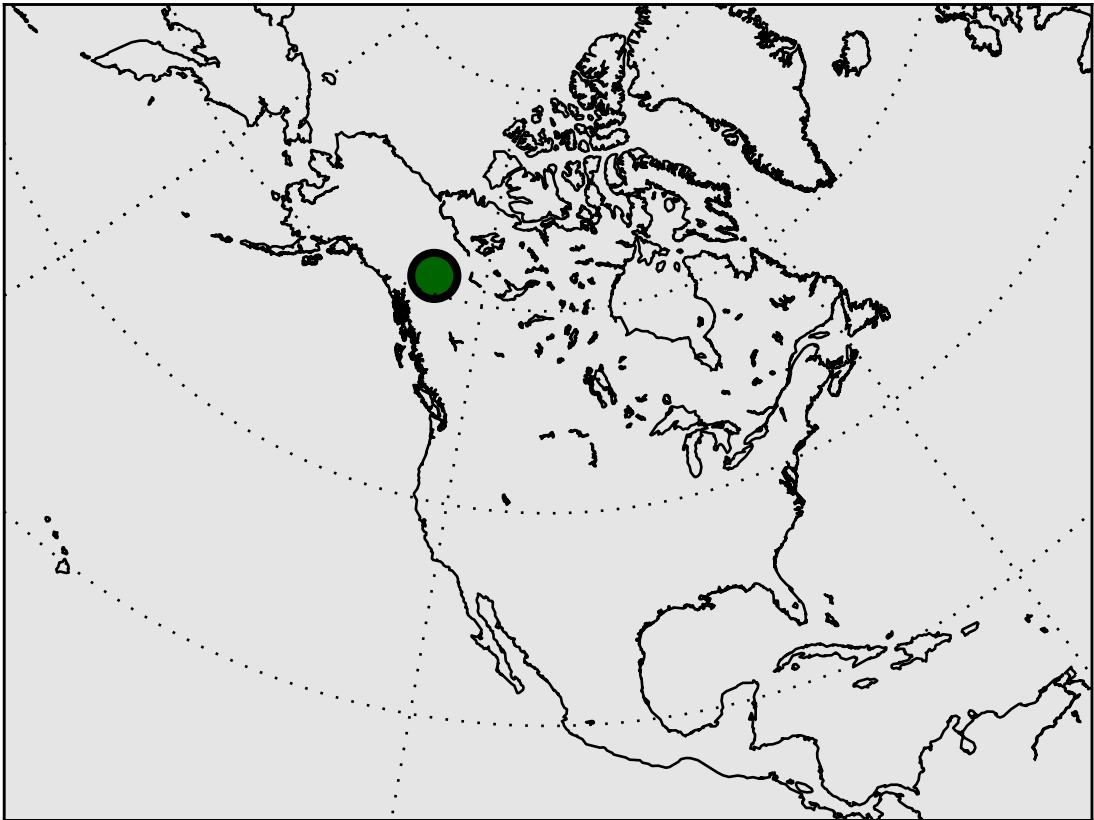

|                    |                                                                                              |
|--------------------|----------------------------------------------------------------------------------------------|
| Dataset name:      | CandelabraLake.Cwynar.1995                                                                   |
| Archive type:      | LakeSediment                                                                                 |
| Proxy type:        | pollen                                                                                       |
| Variable name:     | temperature                                                                                  |
| Latitude ( ° N):   | 61.68                                                                                        |
| Longitude ( ° E):  | -130.65                                                                                      |
| Elevation (m):     | 1040.0                                                                                       |
| Interp. variable:  | T                                                                                            |
| Interp. detail:    | air@surface                                                                                  |
| Interp. season:    | summer+                                                                                      |
| Interp. direction: | positive                                                                                     |
| Pub. 1 title:      | Paleovegetation and paleoclimatic changes in the Y...                                        |
| Pub. 1 authors:    | Cwynar, Les C.; Spear, Ray W.                                                                |
| Pub. 1 year:       | 1995                                                                                         |
| Pub. 1 DOI:        | 10.7202/033027ar                                                                             |
| Original data URL: | <a href="http://www.ncdc.noaa.gov/paleo/study/15444">www.ncdc.noaa.gov/paleo/study/15444</a> |

Proxy data and metadata

LakeSediment | pollen | CandelabraLake.Cwynar.1995 | PYTDXV7NZNU

Proxy time series: precipitation

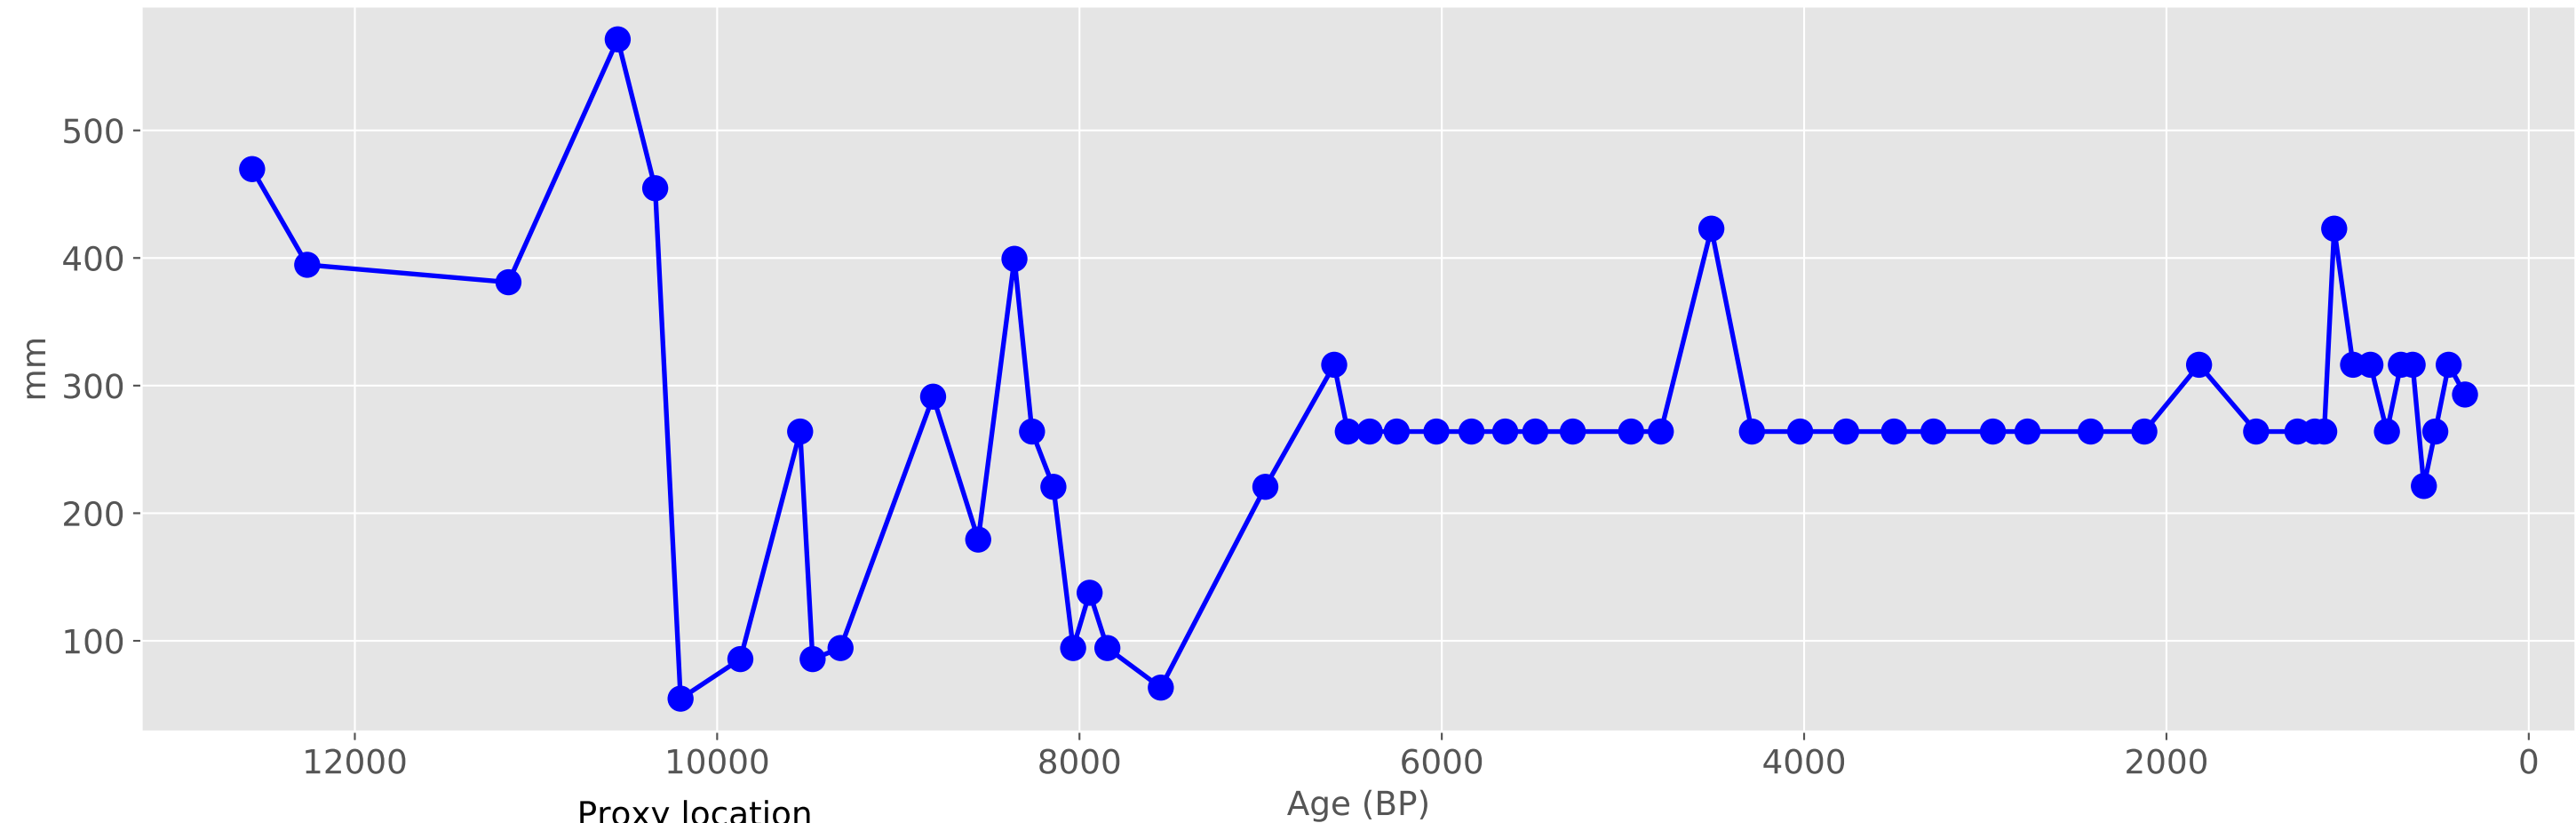

Proxy location  
(61.68 ° N, 130.65 ° W)

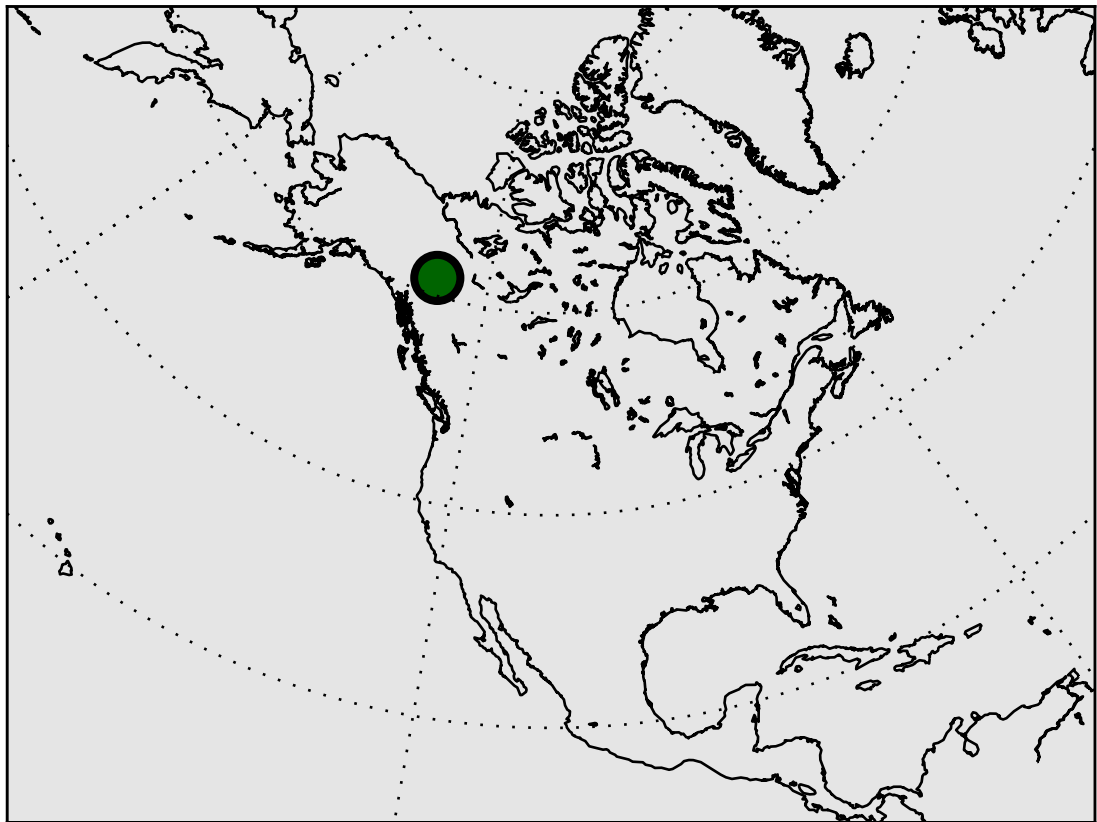

|                    |                                                                                              |
|--------------------|----------------------------------------------------------------------------------------------|
| Dataset name:      | CandelabraLake.Cwynar.1995                                                                   |
| Archive type:      | LakeSediment                                                                                 |
| Proxy type:        | pollen                                                                                       |
| Variable name:     | precipitation                                                                                |
| Latitude ( ° N):   | 61.68                                                                                        |
| Longitude ( ° E):  | -130.65                                                                                      |
| Elevation (m):     | 1040.0                                                                                       |
| Interp. variable:  | P                                                                                            |
| Interp. detail:    | amount@surface                                                                               |
| Interp. season:    | annual                                                                                       |
| Interp. direction: | positive                                                                                     |
| Pub. 1 title:      | Paleovegetation and paleoclimatic changes in the Y...                                        |
| Pub. 1 authors:    | Cwynar, Les C.; Spear, Ray W.                                                                |
| Pub. 1 year:       | 1995                                                                                         |
| Pub. 1 DOI:        | 10.7202/033027ar                                                                             |
| Original data URL: | <a href="http://www.ncdc.noaa.gov/paleo/study/15444">www.ncdc.noaa.gov/paleo/study/15444</a> |

Proxy data and metadata  
LakeSediment | pollen | CandelabraLake.Cwynar.1995 | RAlI4J7F1rY

Proxy time series: temperatureComposite

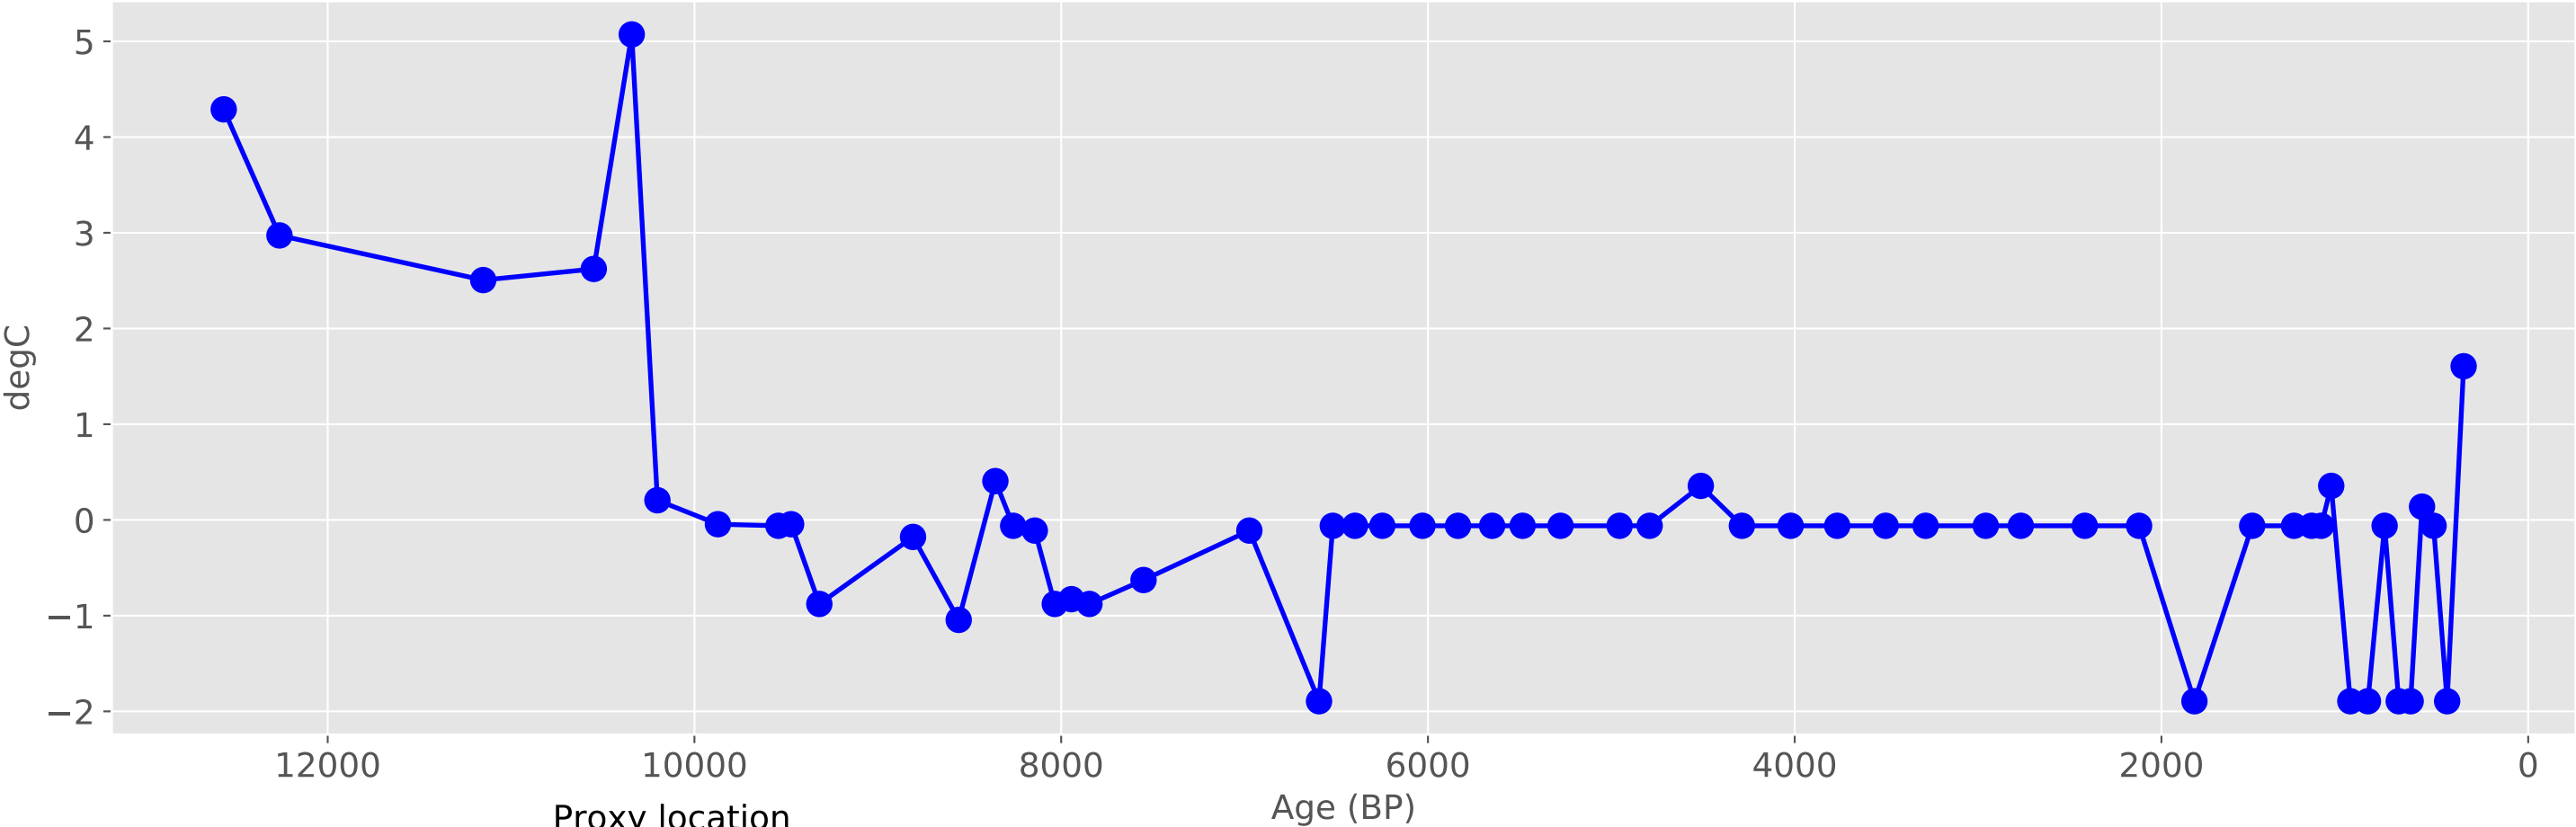

Proxy location  
(61.68 ° N, 130.65 ° W)



|                    |                                                                                              |
|--------------------|----------------------------------------------------------------------------------------------|
| Dataset name:      | CandelabraLake.Cwynar.1995                                                                   |
| Archive type:      | LakeSediment                                                                                 |
| Proxy type:        | pollen                                                                                       |
| Variable name:     | temperatureComposite                                                                         |
| Latitude ( ° N):   | 61.68                                                                                        |
| Longitude ( ° E):  | -130.65                                                                                      |
| Elevation (m):     | 1040.0                                                                                       |
| Interp. variable:  | T                                                                                            |
| Interp. detail:    | air@surface                                                                                  |
| Interp. season:    | annual                                                                                       |
| Interp. direction: | positive                                                                                     |
| Pub. 1 title:      | Paleovegetation and paleoclimatic changes in the Y...                                        |
| Pub. 1 authors:    | Cwynar, Les C.; Spear, Ray W.                                                                |
| Pub. 1 year:       | 1995                                                                                         |
| Pub. 1 DOI:        | 10.7202/033027ar                                                                             |
| Original data URL: | <a href="http://www.ncdc.noaa.gov/paleo/study/15444">www.ncdc.noaa.gov/paleo/study/15444</a> |

Proxy data and metadata

LakeSediment | pollen | CandelabraLake.Cwynar.1995 | WEBbc9e627b

Proxy time series: temperature

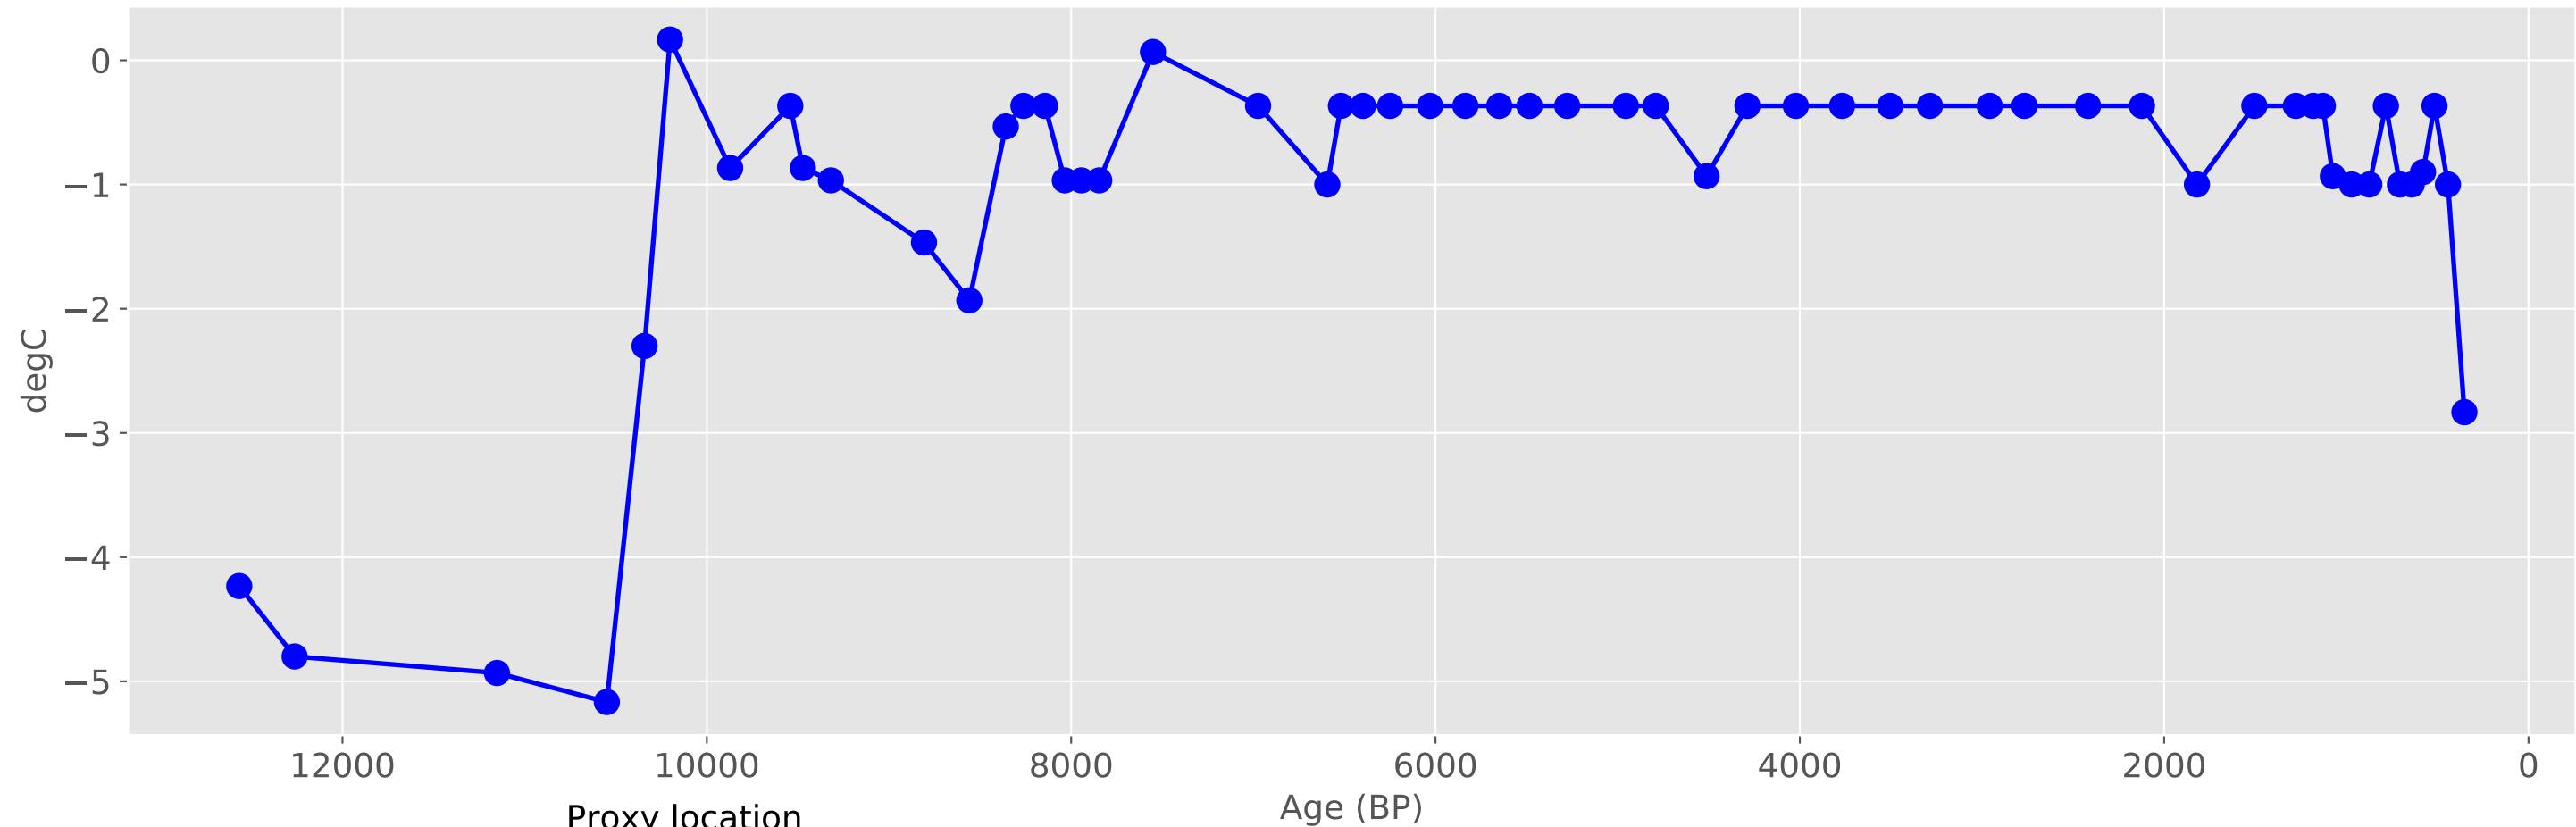

Proxy location  
(61.68 ° N, 130.65 ° W)

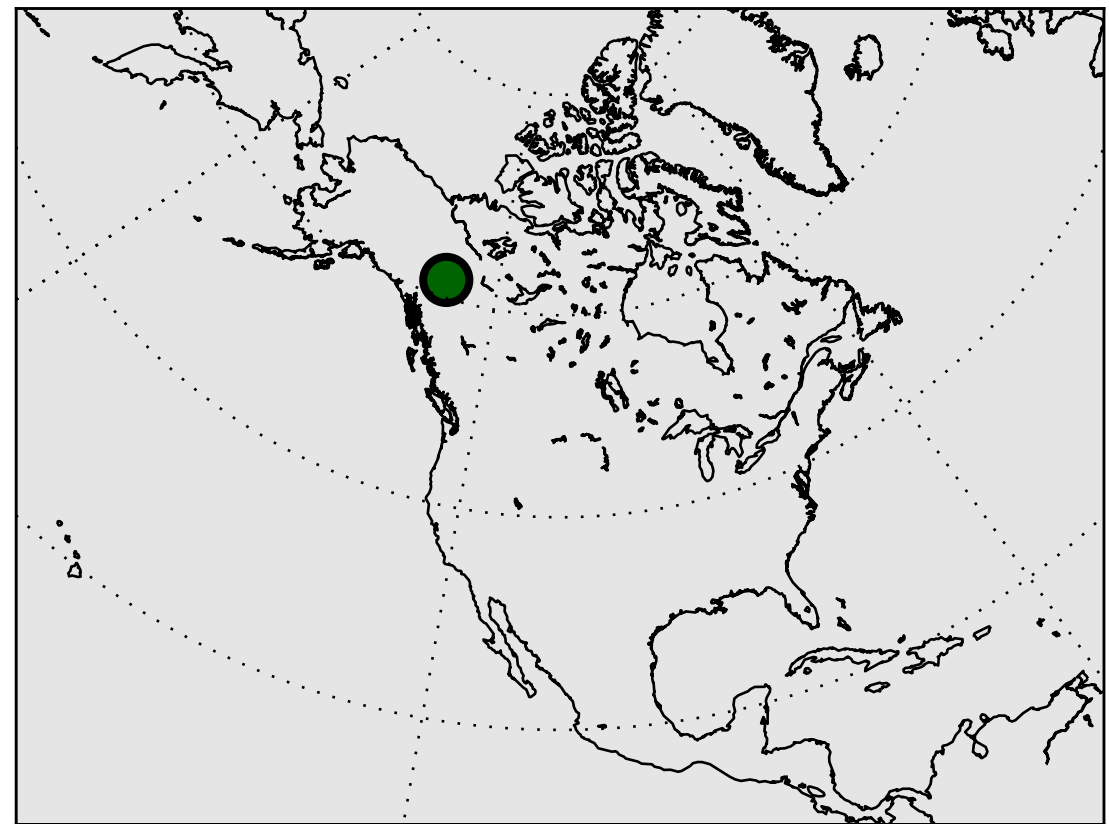

|                    |                                                       |
|--------------------|-------------------------------------------------------|
| Dataset name:      | CandelabraLake.Cwynar.1995                            |
| Archive type:      | LakeSediment                                          |
| Proxy type:        | pollen                                                |
| Variable name:     | temperature                                           |
| Latitude ( ° N):   | 61.68                                                 |
| Longitude ( ° E):  | -130.65                                               |
| Elevation (m):     | 1040.0                                                |
| Interp. variable:  | T                                                     |
| Interp. detail:    | air@surface                                           |
| Interp. season:    | winter+                                               |
| Interp. direction: | positive                                              |
| Pub. 1 title:      | Paleovegetation and paleoclimatic changes in the Y... |
| Pub. 1 authors:    | Cwynar, Les C.; Spear, Ray W.                         |
| Pub. 1 year:       | 1995                                                  |
| Pub. 1 DOI:        | 10.7202/033027ar                                      |
| Original data URL: | www.ncdc.noaa.gov/paleo/study/15444                   |



Proxy data and metadata  
LakeSediment | pollen | UpperFly.Bunbury.2009 | PYT1E469BV6

Proxy time series: precipitation

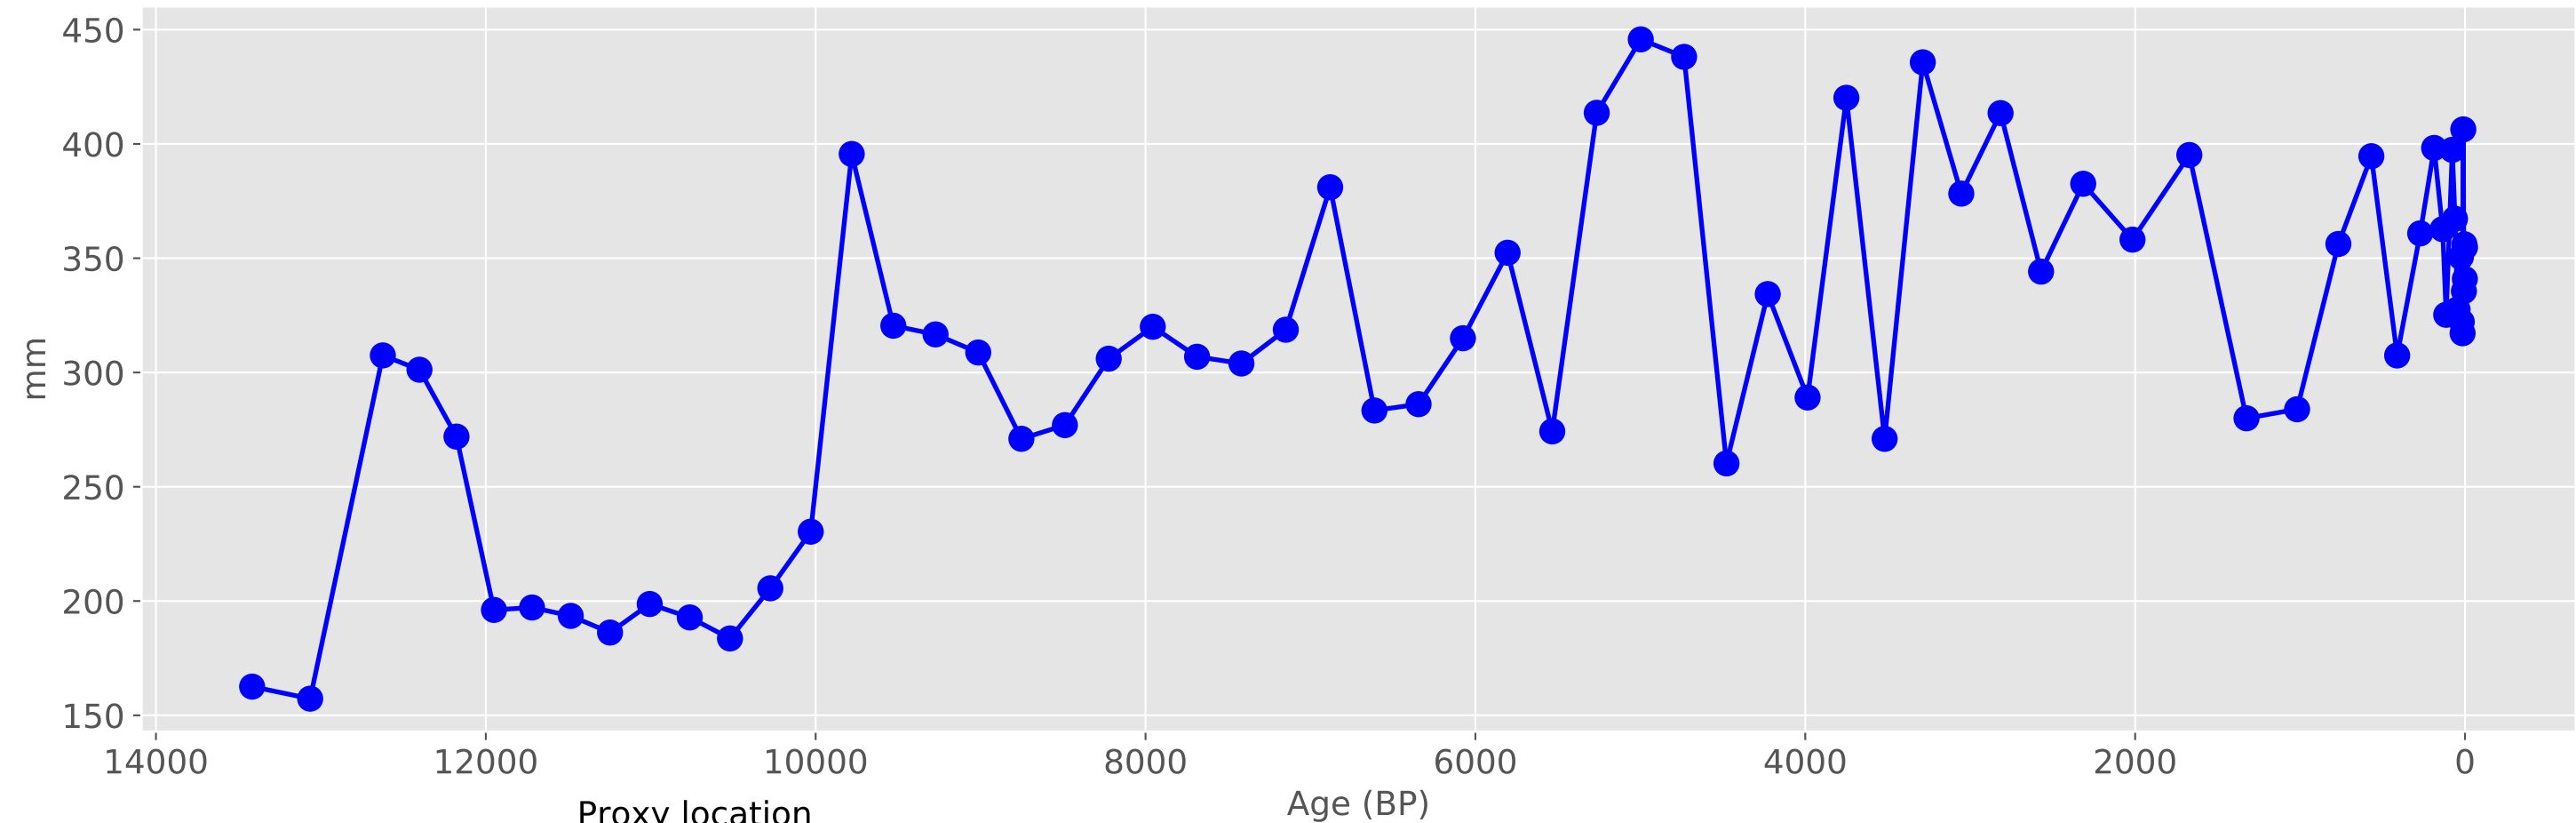

Proxy location  
(61.07 ° N, 138.09 ° W)

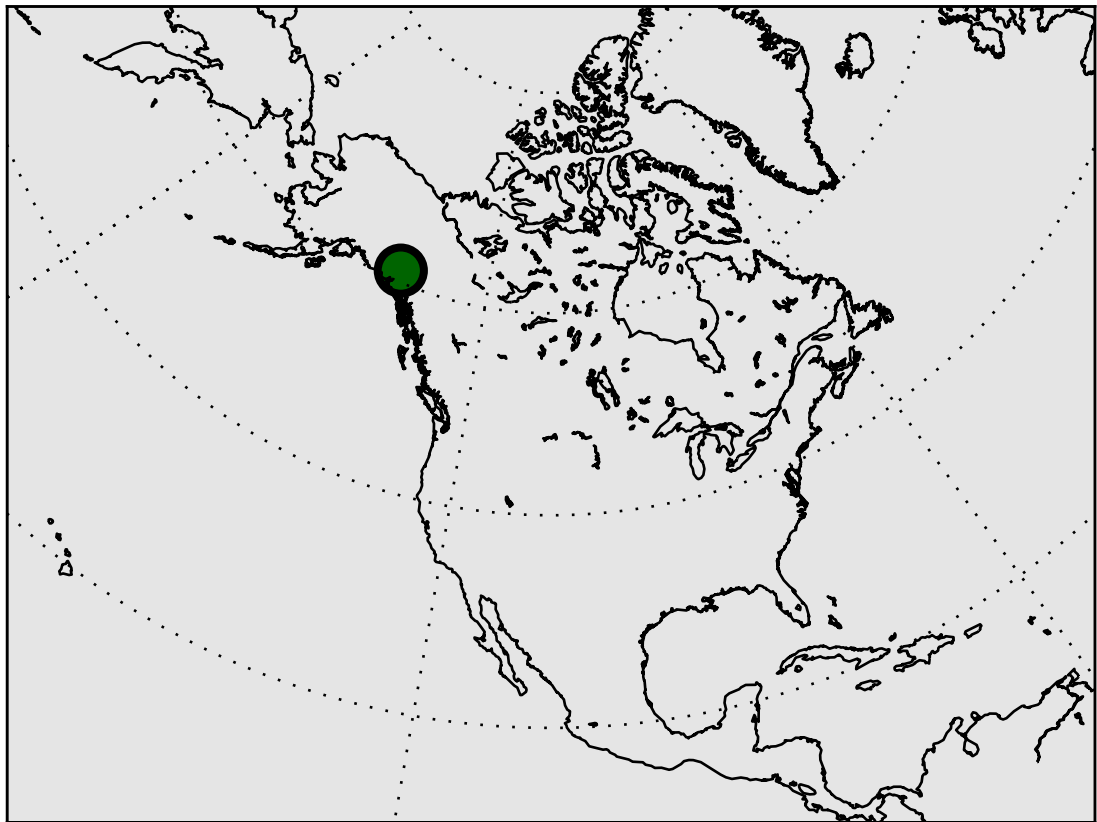

|                    |                                                       |
|--------------------|-------------------------------------------------------|
| Dataset name:      | UpperFly.Bunbury.2009                                 |
| Archive type:      | LakeSediment                                          |
| Proxy type:        | pollen                                                |
| Variable name:     | precipitation                                         |
| Latitude ( ° N):   | 61.07                                                 |
| Longitude ( ° E):  | -138.09                                               |
| Elevation (m):     | 1326.0                                                |
| Interp. variable:  | P                                                     |
| Interp. detail:    | amount@surface                                        |
| Interp. season:    | annual                                                |
| Interp. direction: | positive                                              |
| Pub. 1 title:      | Postglacial climates inferred from a lake at treel... |
| Pub. 1 authors:    | Bunbury, Joan; Gajewski, Konrad                       |
| Pub. 1 year:       | 2009                                                  |
| Pub. 1 DOI:        | 10.1016/j.quascirev.2008.10.007                       |
| Original data URL: | www.ncdc.noaa.gov/paleo/study/15444                   |

Proxy data and metadata  
LakeSediment | pollen | UpperFly.Bunbury.2009 | PYTXRLAM6GY

Proxy time series: temperature

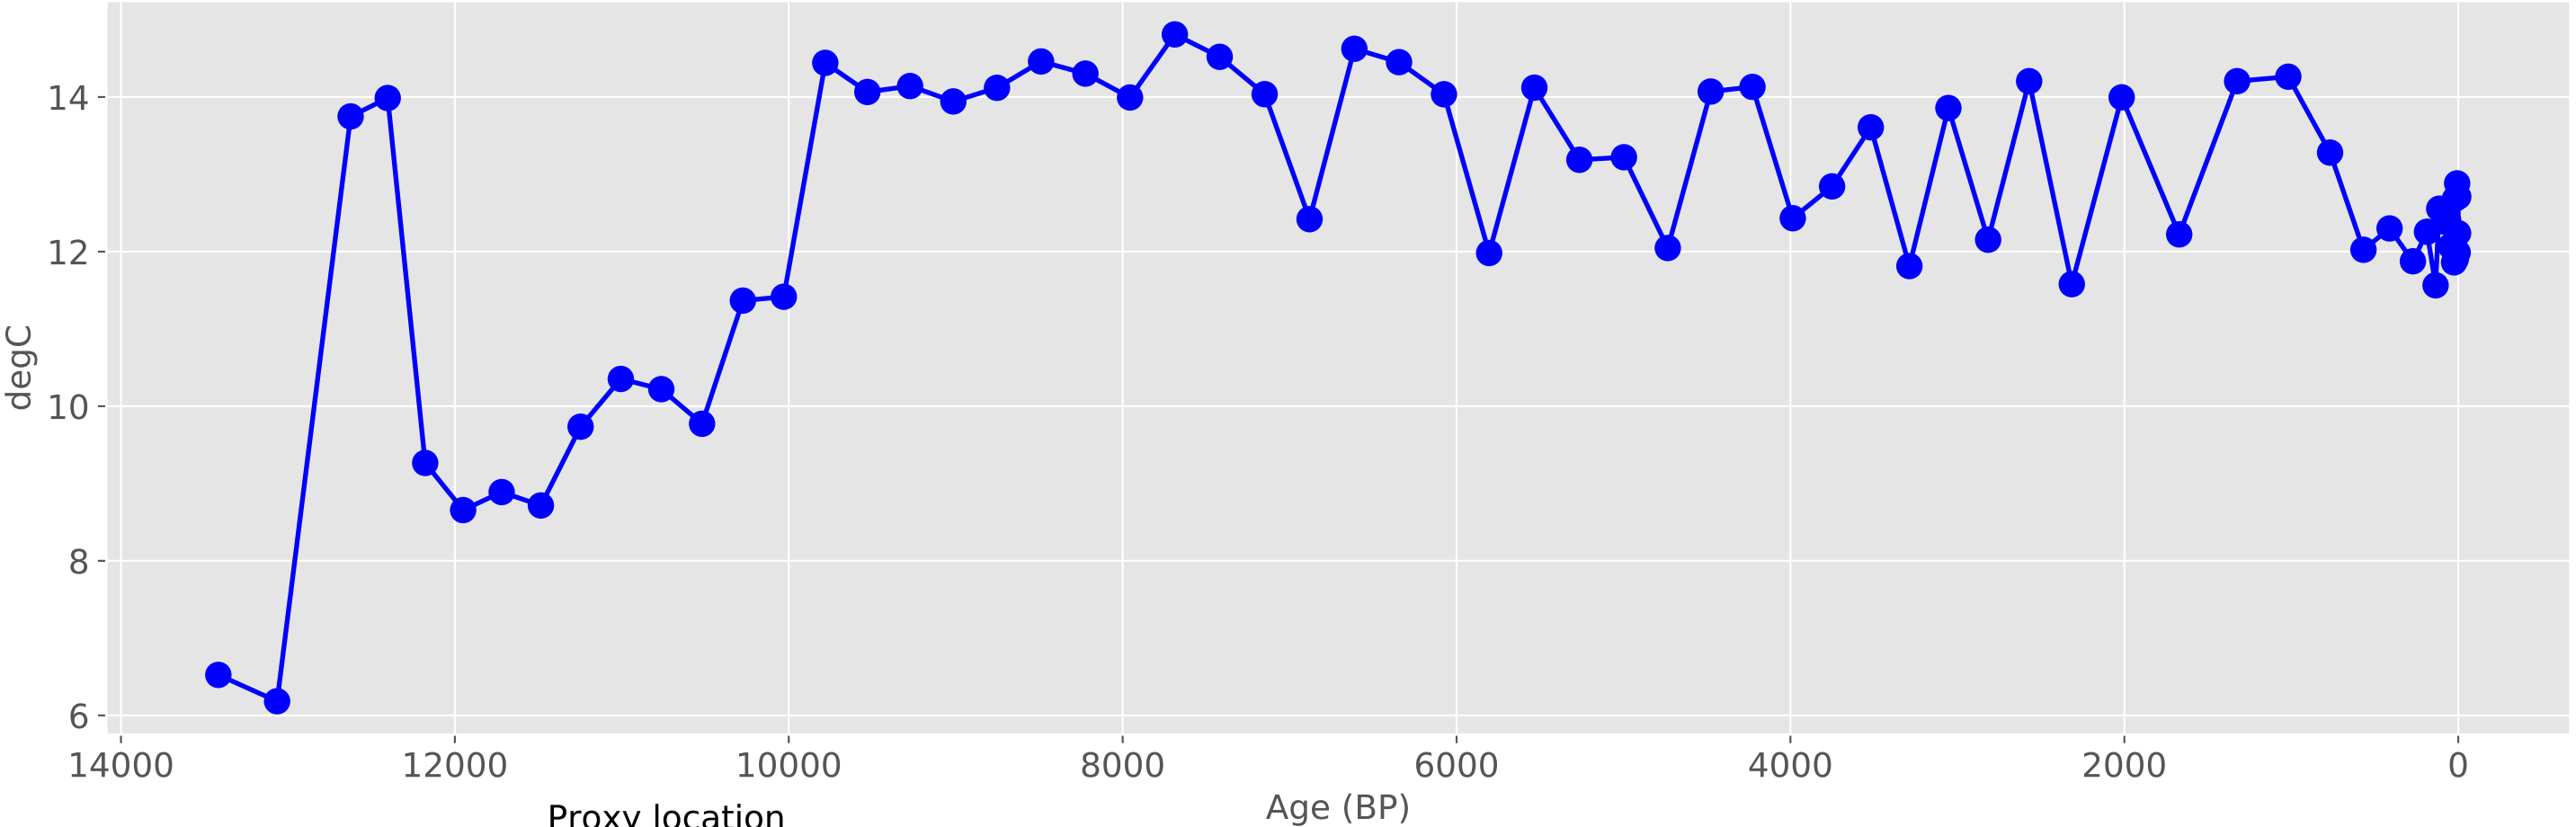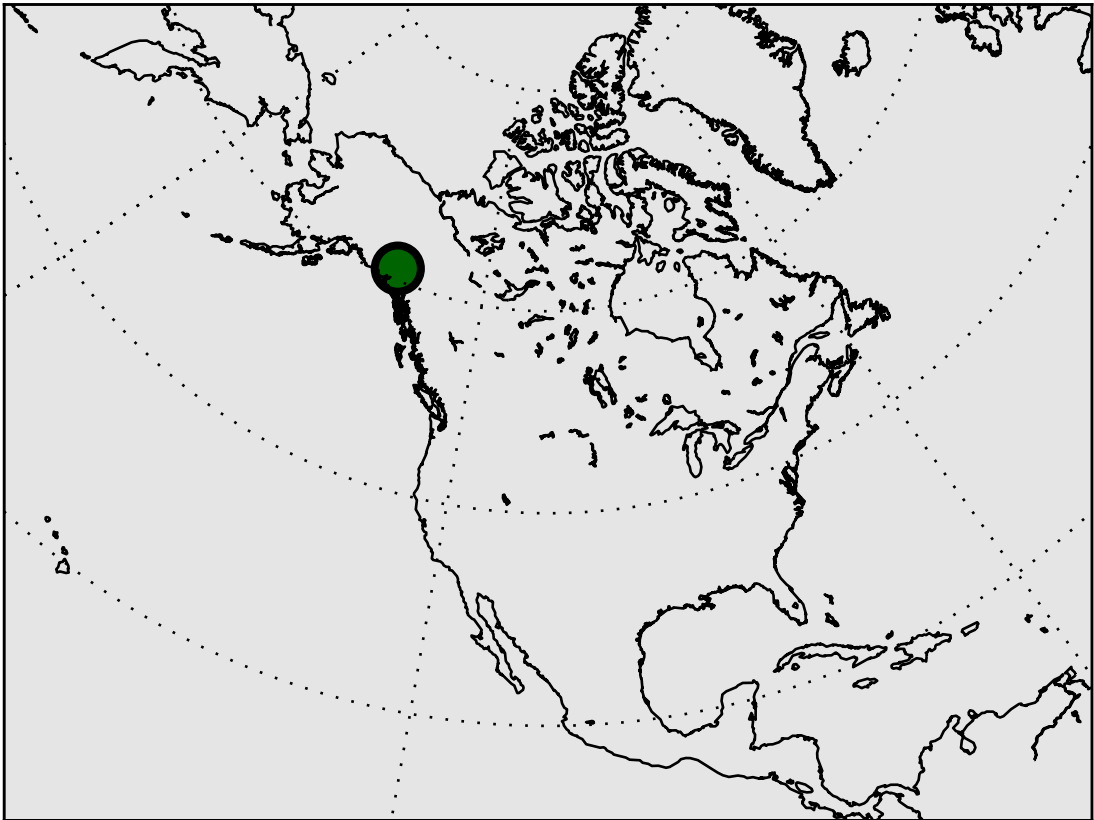

|                    |                                                       |
|--------------------|-------------------------------------------------------|
| Dataset name:      | UpperFly.Bunbury.2009                                 |
| Archive type:      | LakeSediment                                          |
| Proxy type:        | pollen                                                |
| Variable name:     | temperature                                           |
| Latitude ( ° N):   | 61.07                                                 |
| Longitude ( ° E):  | -138.09                                               |
| Elevation (m):     | 1326.0                                                |
| Interp. variable:  | T                                                     |
| Interp. detail:    | air@surface                                           |
| Interp. season:    | summerOnly                                            |
| Interp. direction: | positive                                              |
| Pub. 1 title:      | Postglacial climates inferred from a lake at treel... |
| Pub. 1 authors:    | Bunbury, Joan; Gajewski, Konrad                       |
| Pub. 1 year:       | 2009                                                  |
| Pub. 1 DOI:        | 10.1016/j.quascirev.2008.10.007                       |
| Original data URL: | www.ncdc.noaa.gov/paleo/study/15444                   |

Proxy data and metadata  
LakeSediment | pollen | Hail.Cwynar.1995 | PYT1URDUH1H

Proxy time series: temperature

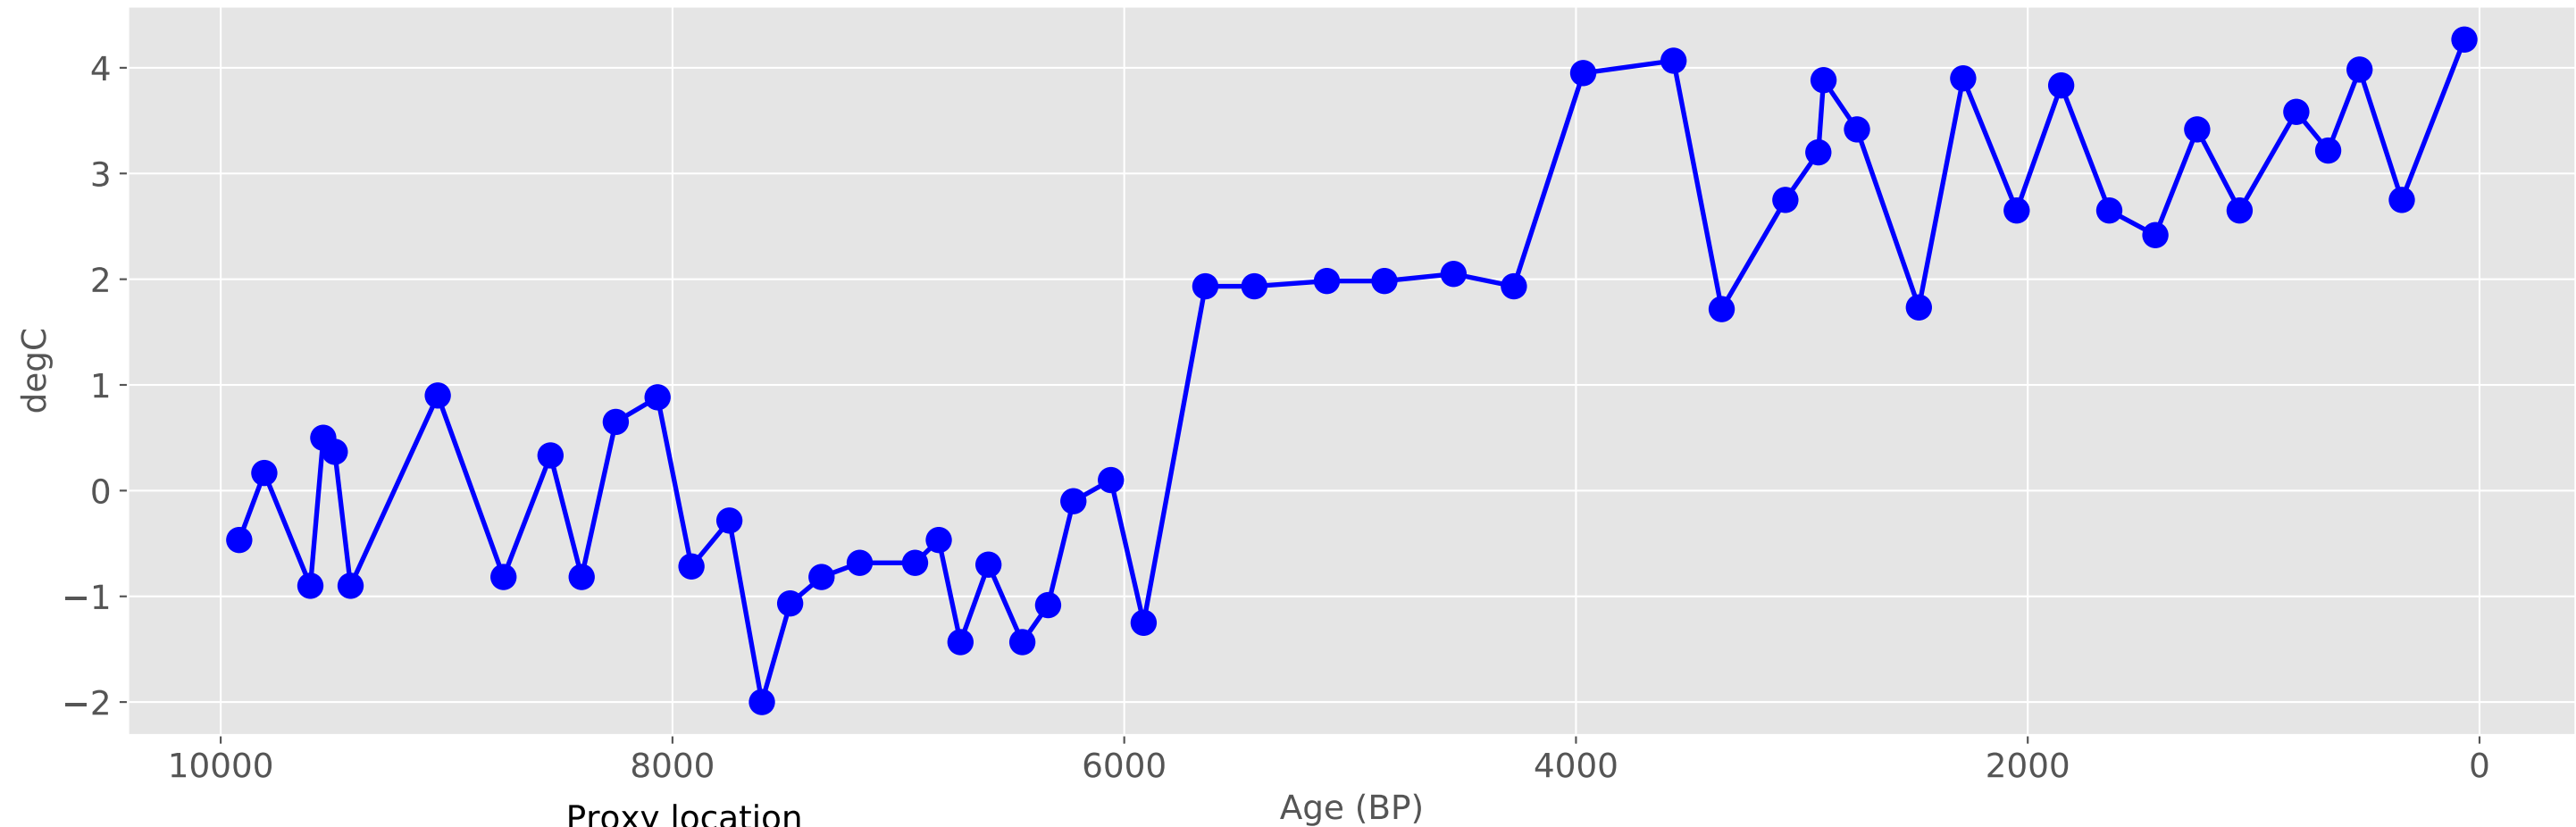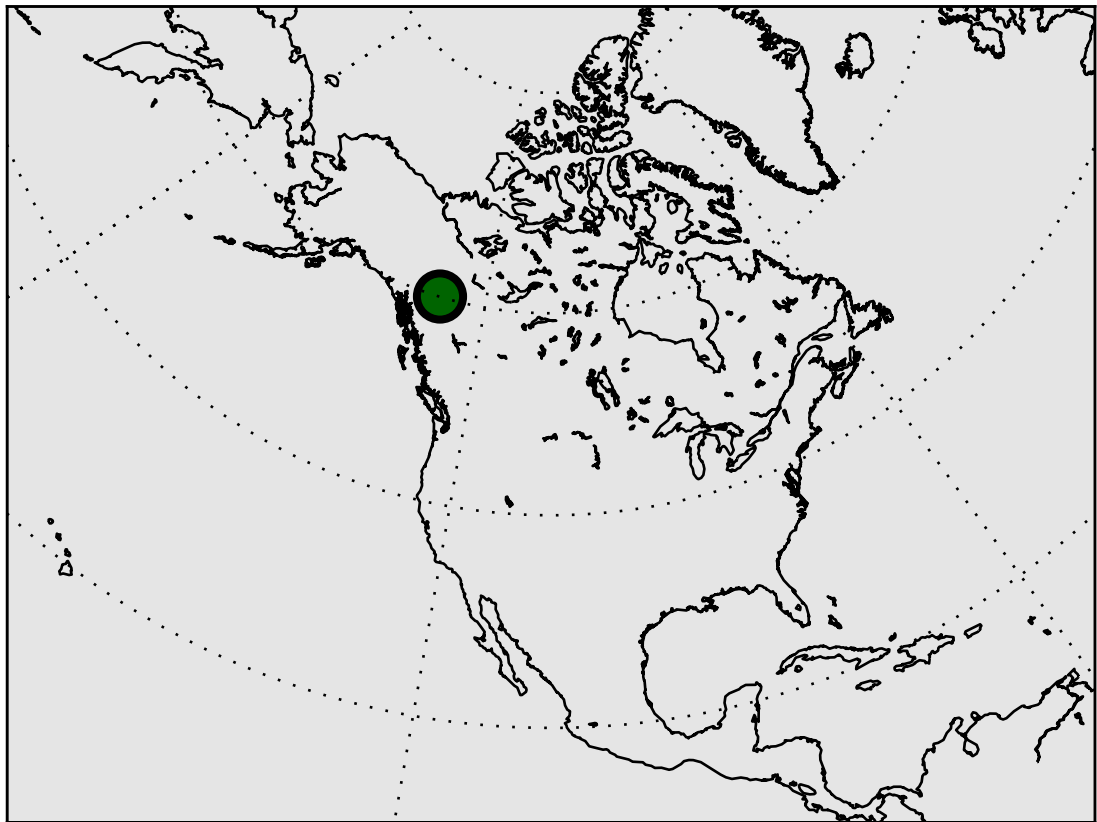

|                    |                                                                                              |
|--------------------|----------------------------------------------------------------------------------------------|
| Dataset name:      | Hail.Cwynar.1995                                                                             |
| Archive type:      | LakeSediment                                                                                 |
| Proxy type:        | pollen                                                                                       |
| Variable name:     | temperature                                                                                  |
| Latitude ( ° N):   | 60.03                                                                                        |
| Longitude ( ° E):  | -129.02                                                                                      |
| Elevation (m):     | 690.0                                                                                        |
| Interp. variable:  | T                                                                                            |
| Interp. detail:    | air@surface                                                                                  |
| Interp. season:    | summerOnly                                                                                   |
| Interp. direction: | positive                                                                                     |
| Pub. 1 title:      | Paleovegetation and paleoclimatic changes in the Y...                                        |
| Pub. 1 authors:    | Cwynar, Les C.; Spear, Ray W.                                                                |
| Pub. 1 year:       | 1995                                                                                         |
| Pub. 1 DOI:        | 10.7202/033027ar                                                                             |
| Original data URL: | <a href="http://www.ncdc.noaa.gov/paleo/study/15444">www.ncdc.noaa.gov/paleo/study/15444</a> |

Proxy data and metadata

LakeSediment | pollen | Hail.Cwynar.1995 | PYTV2PX0LWU

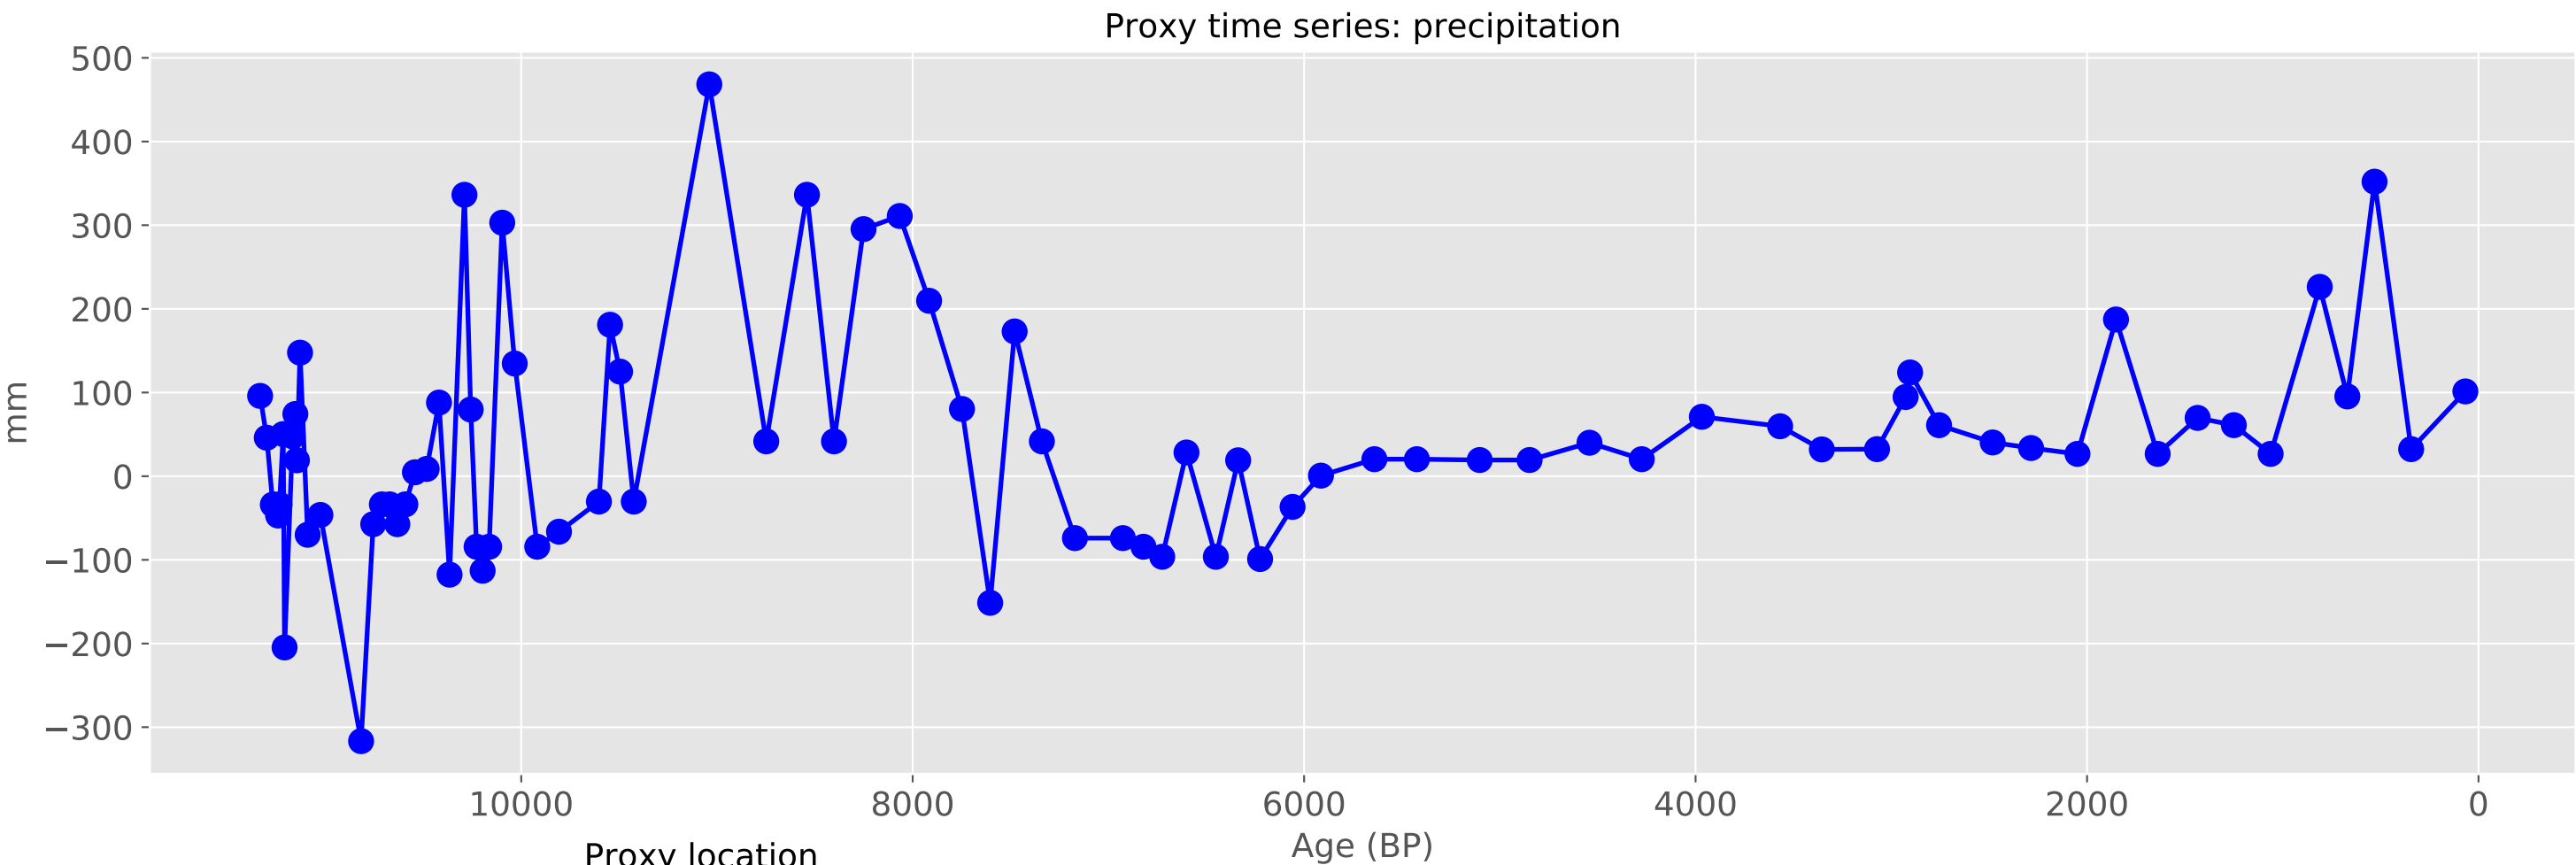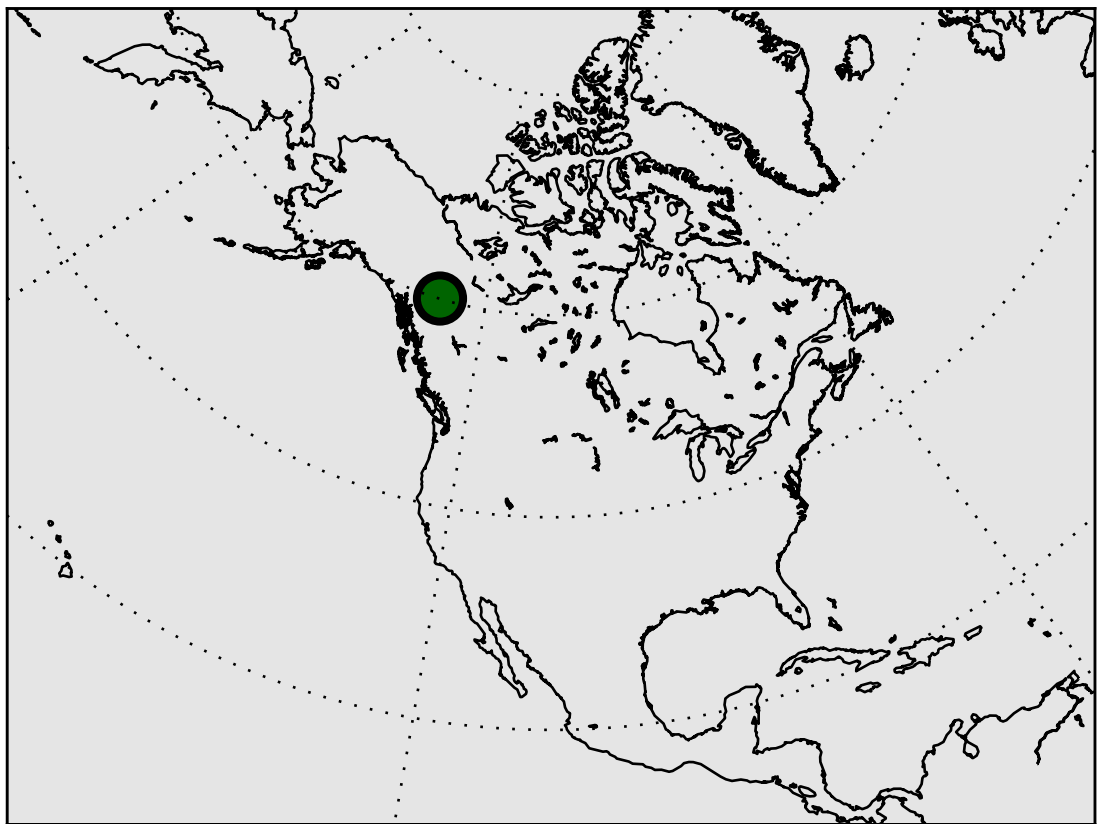

|                    |                                                       |
|--------------------|-------------------------------------------------------|
| Dataset name:      | Hail.Cwynar.1995                                      |
| Archive type:      | LakeSediment                                          |
| Proxy type:        | pollen                                                |
| Variable name:     | precipitation                                         |
| Latitude ( ° N):   | 60.03                                                 |
| Longitude ( ° E):  | -129.02                                               |
| Elevation (m):     | 690.0                                                 |
| Interp. variable:  | P                                                     |
| Interp. detail:    | amount@surface                                        |
| Interp. season:    | annual                                                |
| Interp. direction: | positive                                              |
| Pub. 1 title:      | Paleovegetation and paleoclimatic changes in the Y... |
| Pub. 1 authors:    | Cwynar, Les C.; Spear, Ray W.                         |
| Pub. 1 year:       | 1995                                                  |
| Pub. 1 DOI:        | 10.7202/033027ar                                      |
| Original data URL: | www.ncdc.noaa.gov/paleo/study/15444                   |

Proxy data and metadata  
LakeSediment | pollen | Hail.Cwynar.1995 | PYTW12WS22J

Proxy time series: temperature

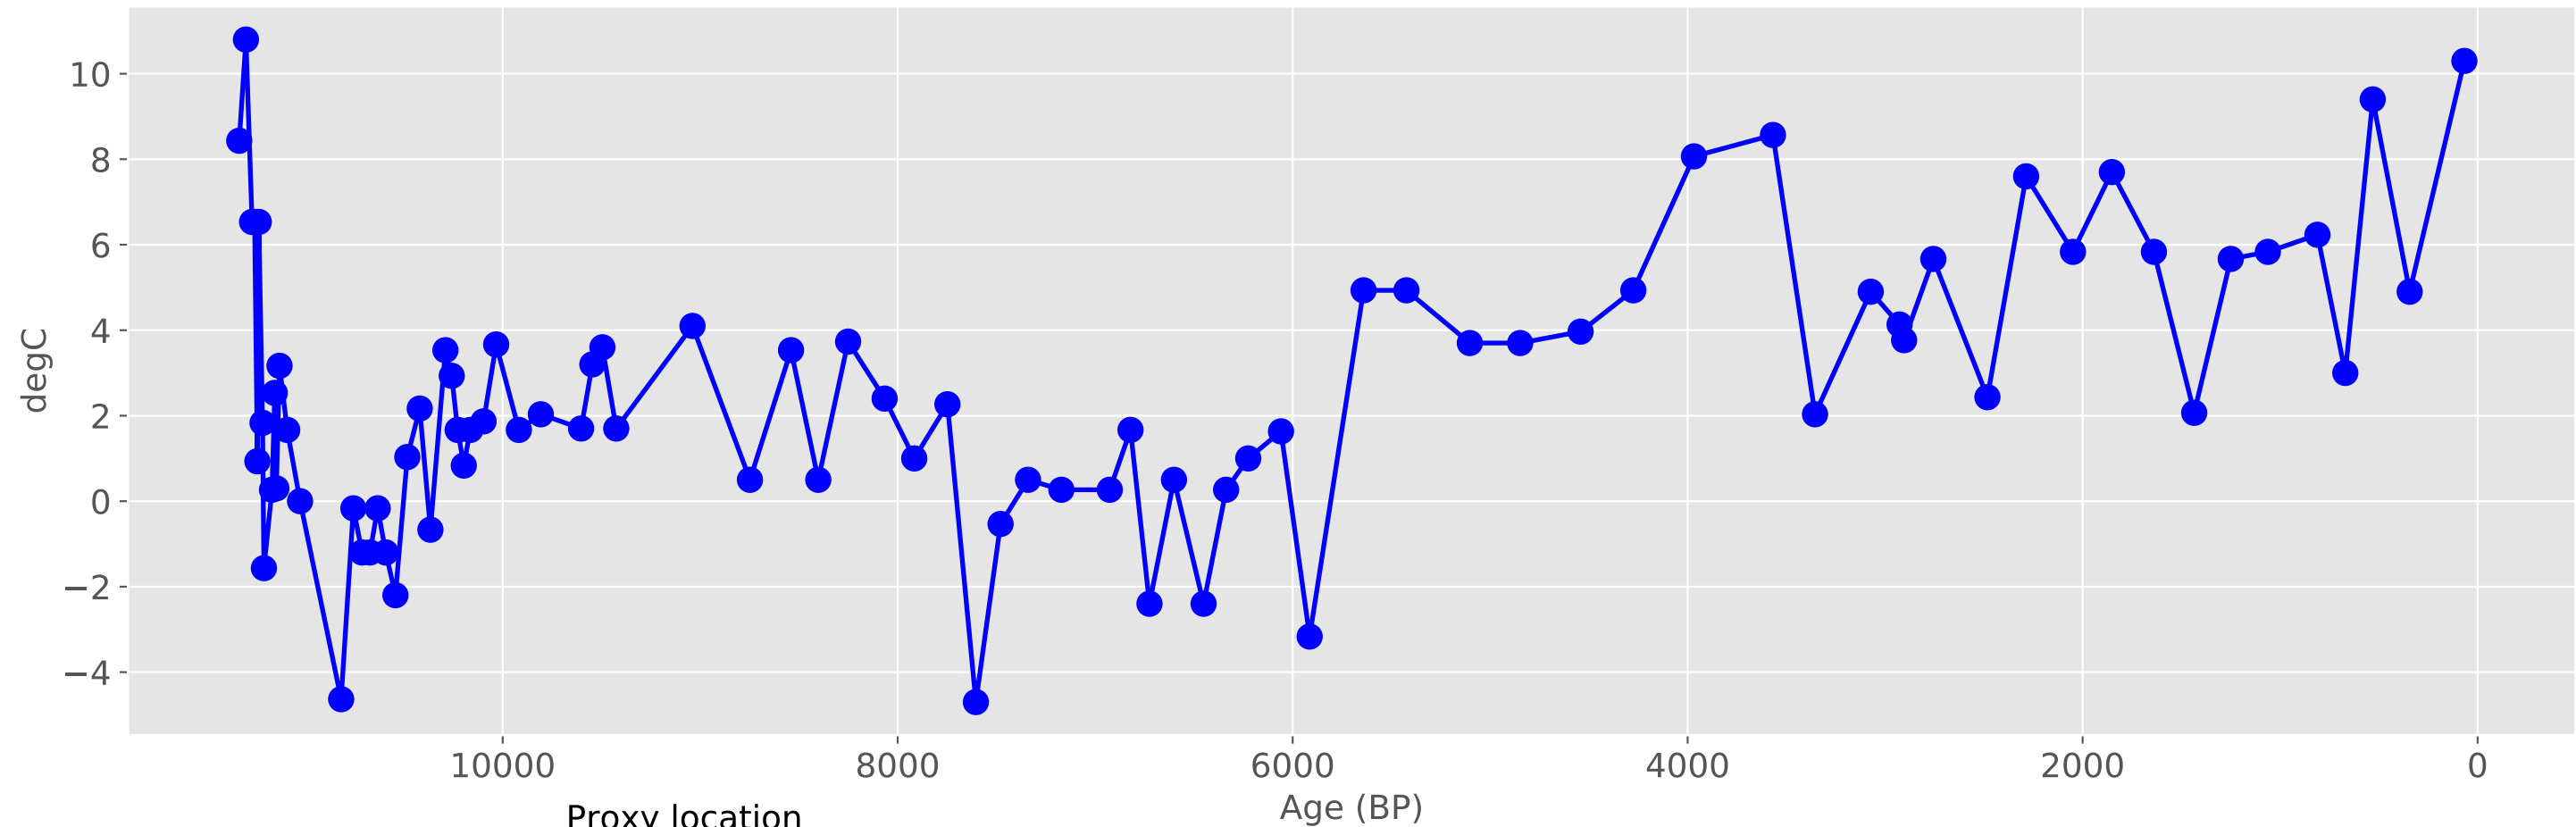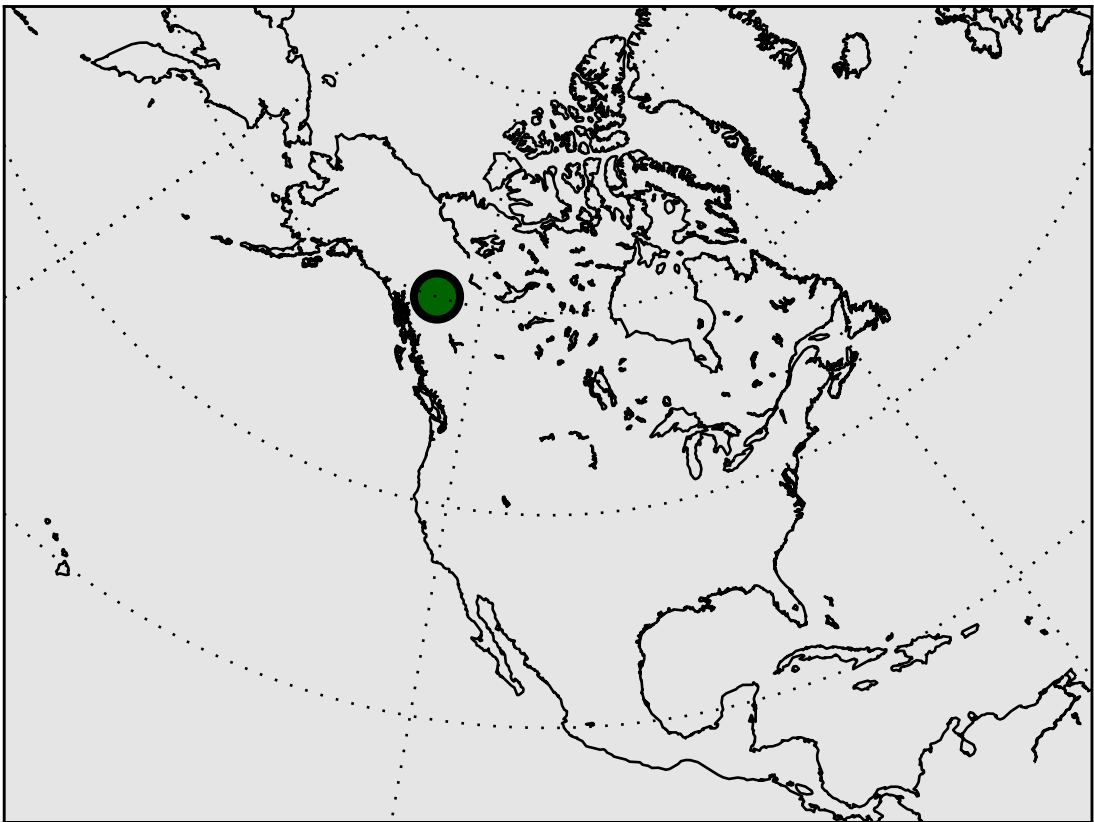

|                    |                                                       |
|--------------------|-------------------------------------------------------|
| Dataset name:      | Hail.Cwynar.1995                                      |
| Archive type:      | LakeSediment                                          |
| Proxy type:        | pollen                                                |
| Variable name:     | temperature                                           |
| Latitude ( ° N):   | 60.03                                                 |
| Longitude ( ° E):  | -129.02                                               |
| Elevation (m):     | 690.0                                                 |
| Interp. variable:  | T                                                     |
| Interp. detail:    | air@surface                                           |
| Interp. season:    | winterOnly                                            |
| Interp. direction: | positive                                              |
| Pub. 1 title:      | Paleovegetation and paleoclimatic changes in the Y... |
| Pub. 1 authors:    | Cwynar, Les C.; Spear, Ray W.                         |
| Pub. 1 year:       | 1995                                                  |
| Pub. 1 DOI:        | 10.7202/033027ar                                      |
| Original data URL: | www.ncdc.noaa.gov/paleo/study/15444                   |

Proxy data and metadata  
LakeSediment | pollen | Lily.Cwynar.1990 | PYTS71USULB

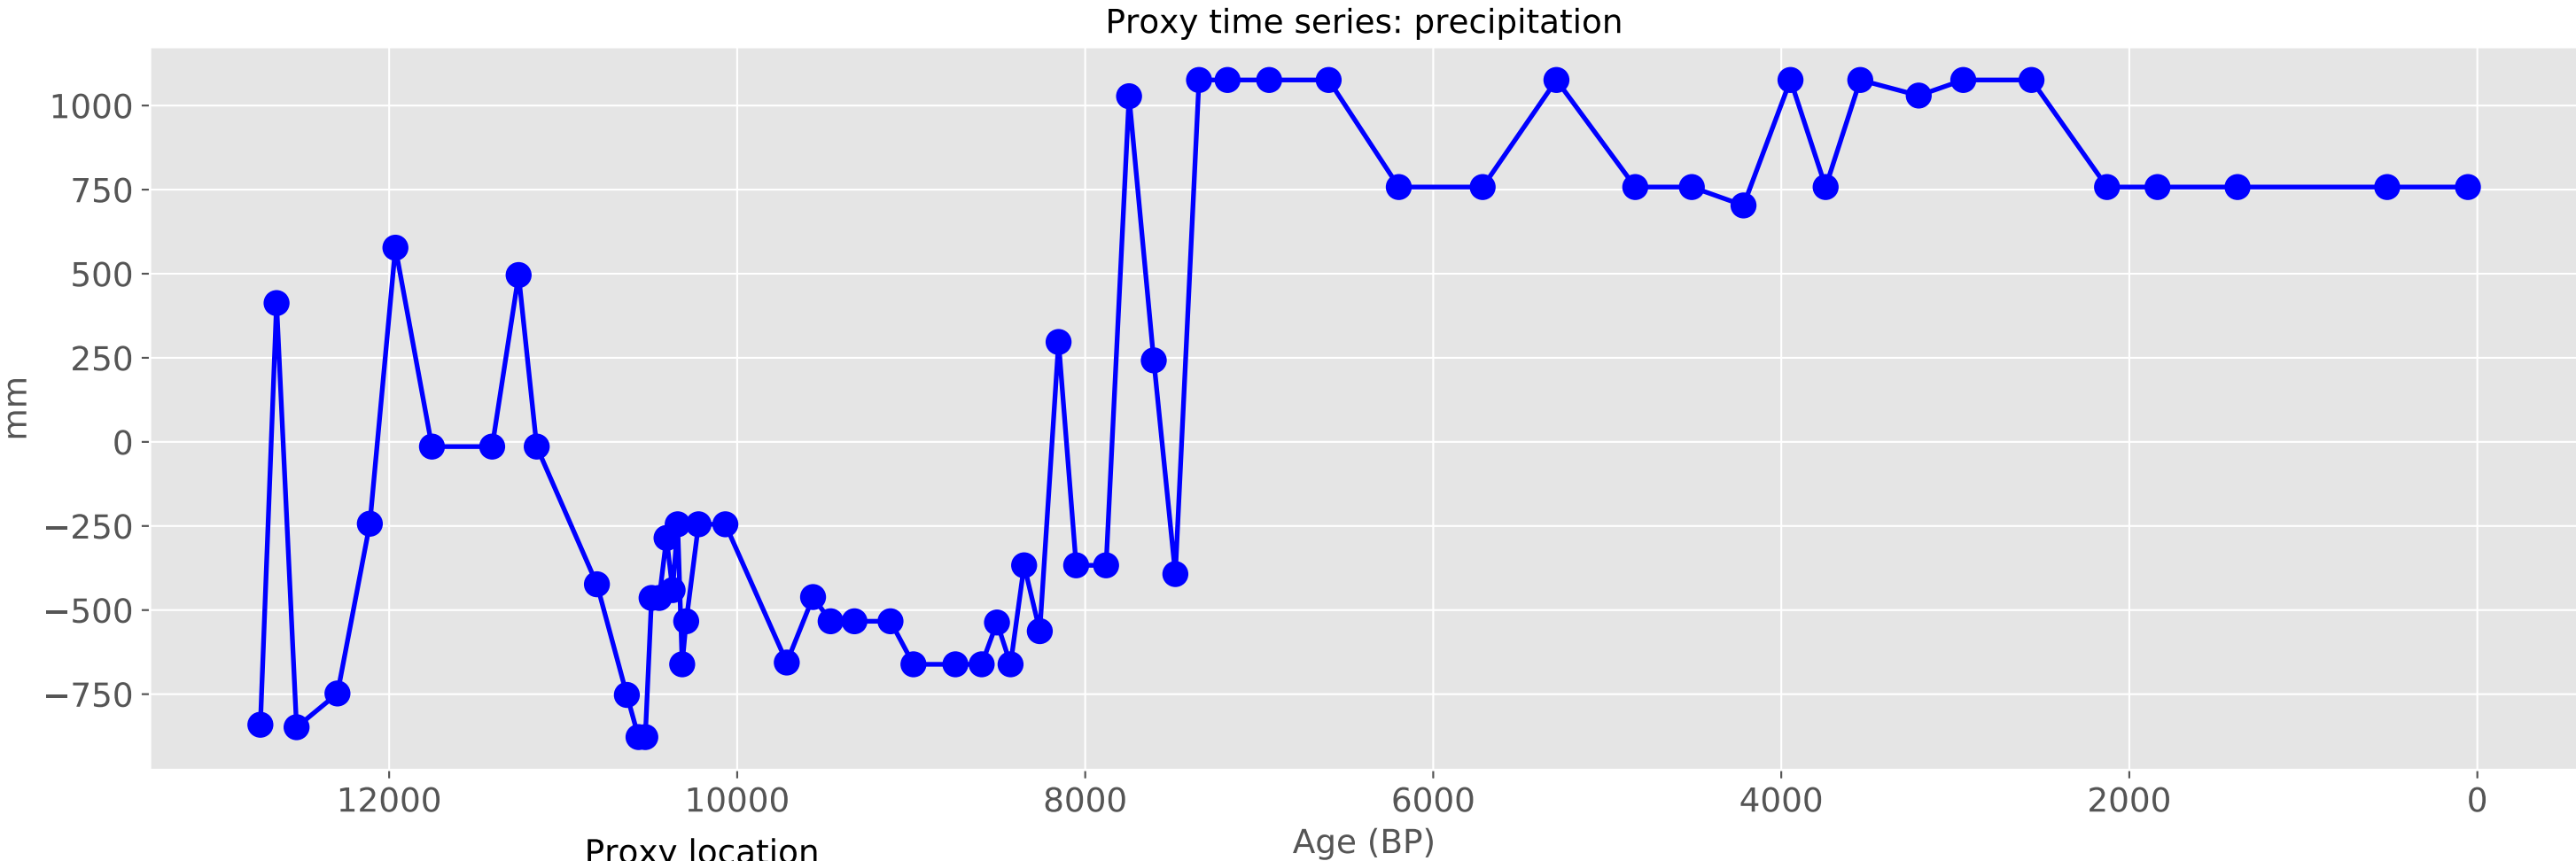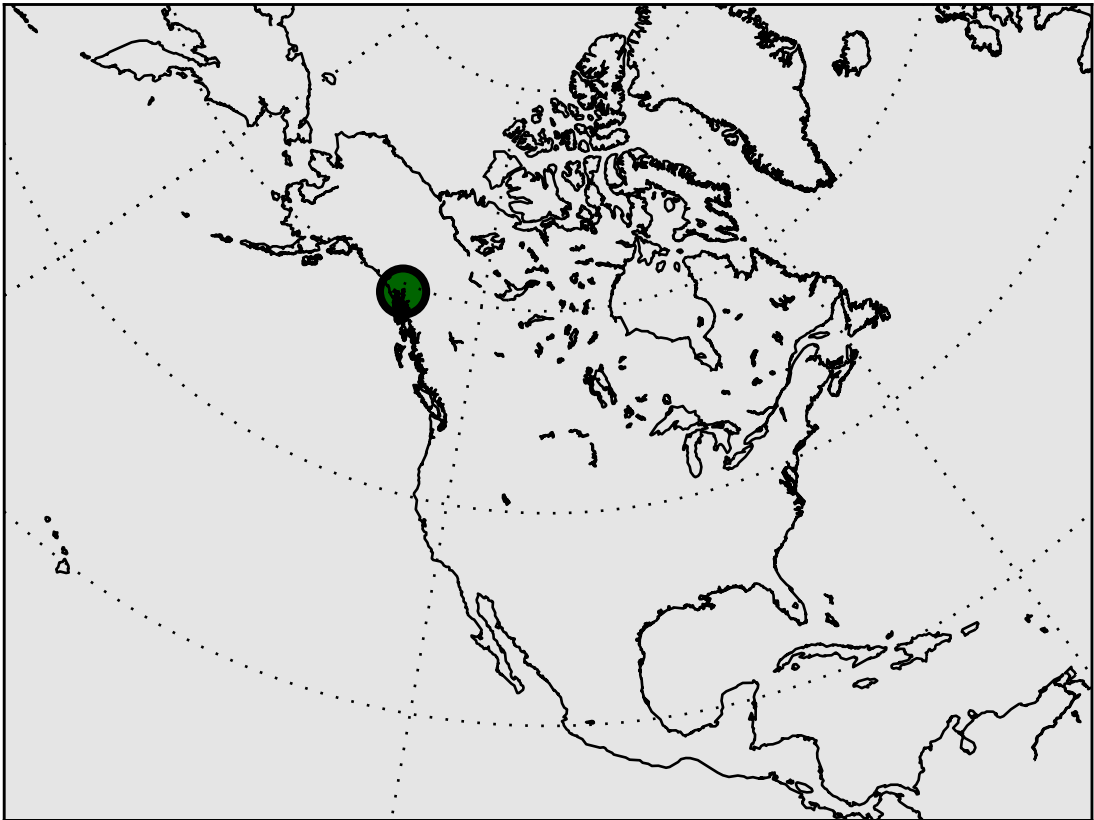

|                    |                                                       |
|--------------------|-------------------------------------------------------|
| Dataset name:      | Lily.Cwynar.1990                                      |
| Archive type:      | LakeSediment                                          |
| Proxy type:        | pollen                                                |
| Variable name:     | precipitation                                         |
| Latitude ( ° N):   | 59.2026                                               |
| Longitude ( ° E):  | -135.3953                                             |
| Elevation (m):     | 230.0                                                 |
| Interp. variable:  | P                                                     |
| Interp. detail:    | amount@surface                                        |
| Interp. season:    | annual                                                |
| Interp. direction: | positive                                              |
| Pub. 1 title:      | A late Quaternary vegetation history from Lily Lak... |
| Pub. 1 authors:    | Cwynar, Les C.                                        |
| Pub. 1 year:       | 1990                                                  |
| Pub. 1 DOI:        | 10.1139/b90-139                                       |
| Original data URL: | www.ncdc.noaa.gov/paleo/study/15444                   |



Proxy data and metadata  
LakeSediment | pollen | Lily.Cwynar.1990 | PYTZAK3QLN0

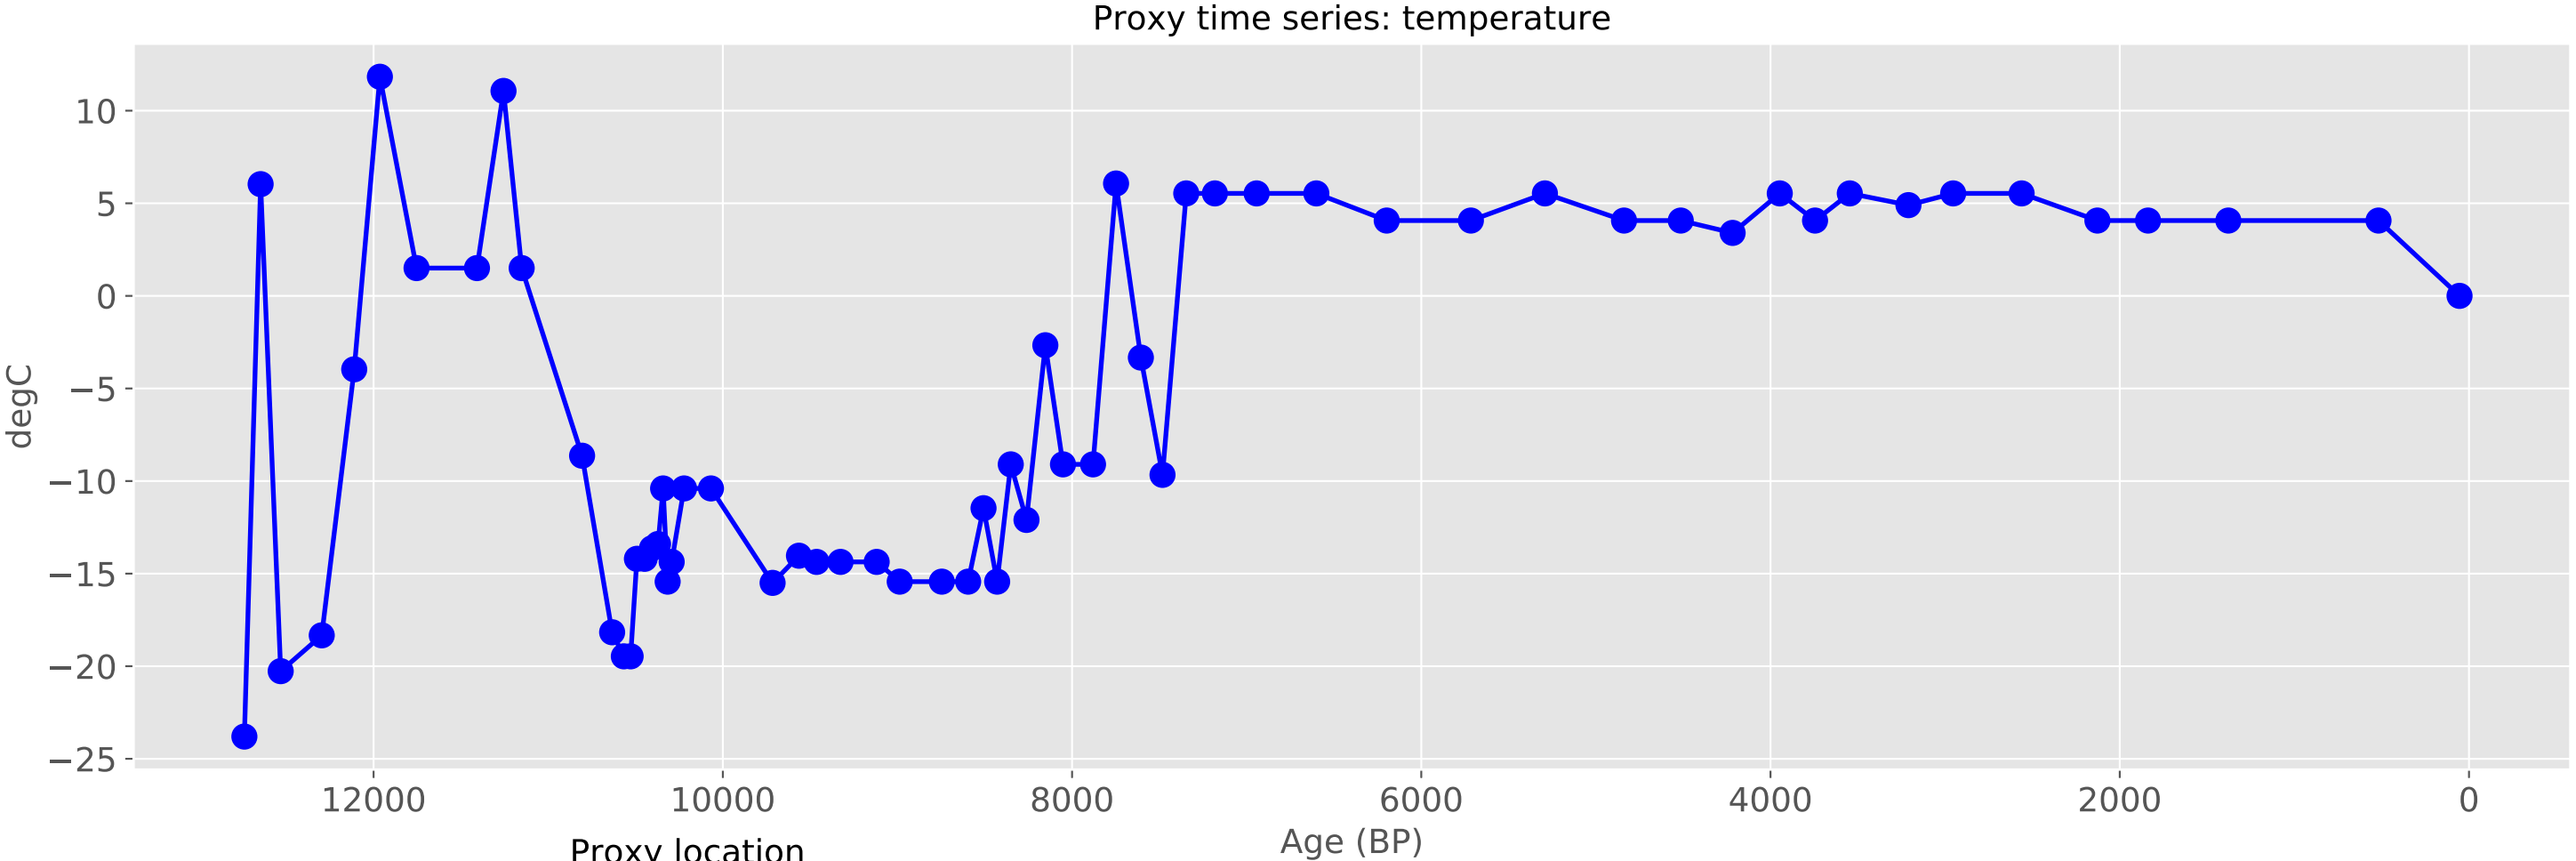

|                    |                                                       |
|--------------------|-------------------------------------------------------|
| Dataset name:      | Lily.Cwynar.1990                                      |
| Archive type:      | LakeSediment                                          |
| Proxy type:        | pollen                                                |
| Variable name:     | temperature                                           |
| Latitude ( ° N):   | 59.2026                                               |
| Longitude ( ° E):  | -135.3953                                             |
| Elevation (m):     | 230.0                                                 |
| Interp. variable:  | T                                                     |
| Interp. detail:    | air@surface                                           |
| Interp. season:    | winter+                                               |
| Interp. direction: | positive                                              |
| Pub. 1 title:      | A late Quaternary vegetation history from Lily Lak... |
| Pub. 1 authors:    | Cwynar, Les C.                                        |
| Pub. 1 year:       | 1990                                                  |
| Pub. 1 DOI:        | 10.1139/b90-139                                       |
| Original data URL: | www.ncdc.noaa.gov/paleo/study/15444                   |

Proxy data and metadata  
LakeSediment | pollen | Lily.Cwynar.1990 | R9f2mFSr7nU

Proxy time series: temperatureComposite

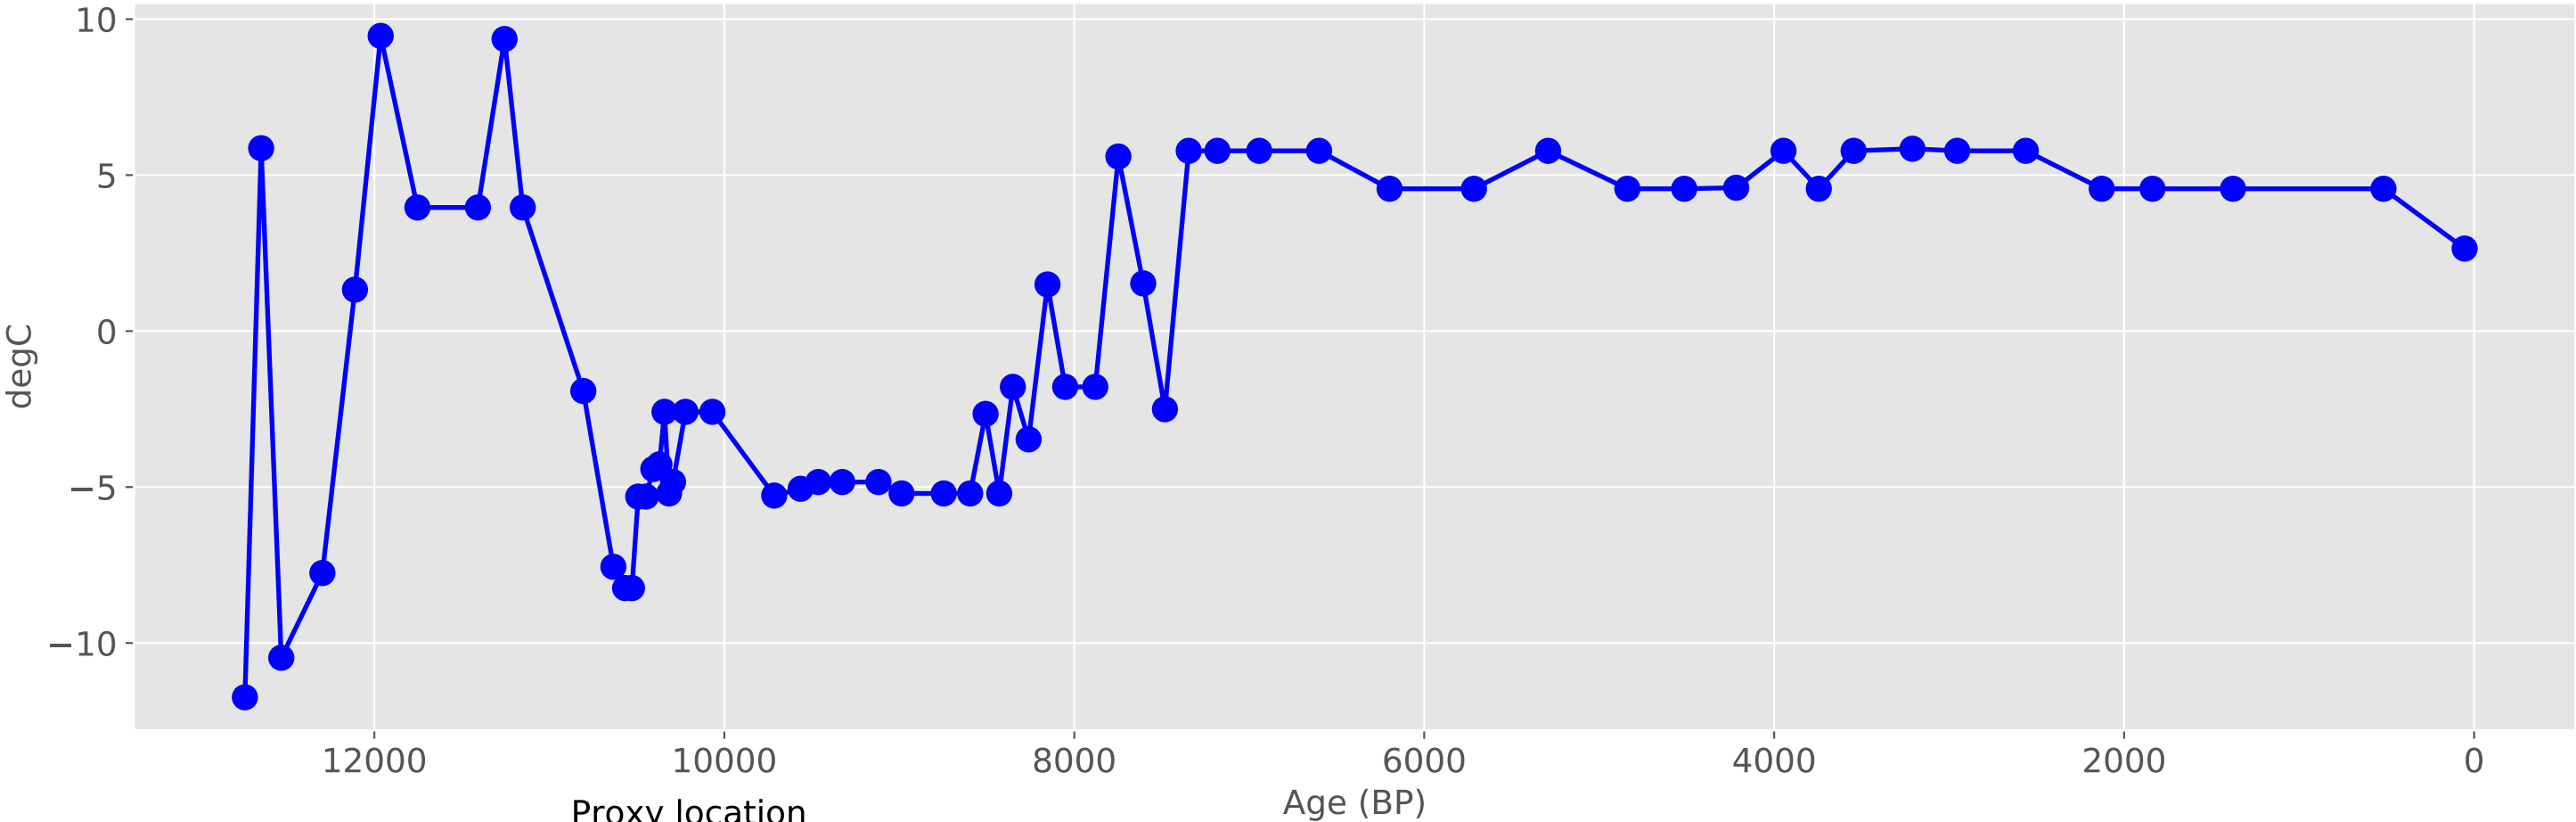

Proxy location  
(59.20 ° N, 135.40 ° W)

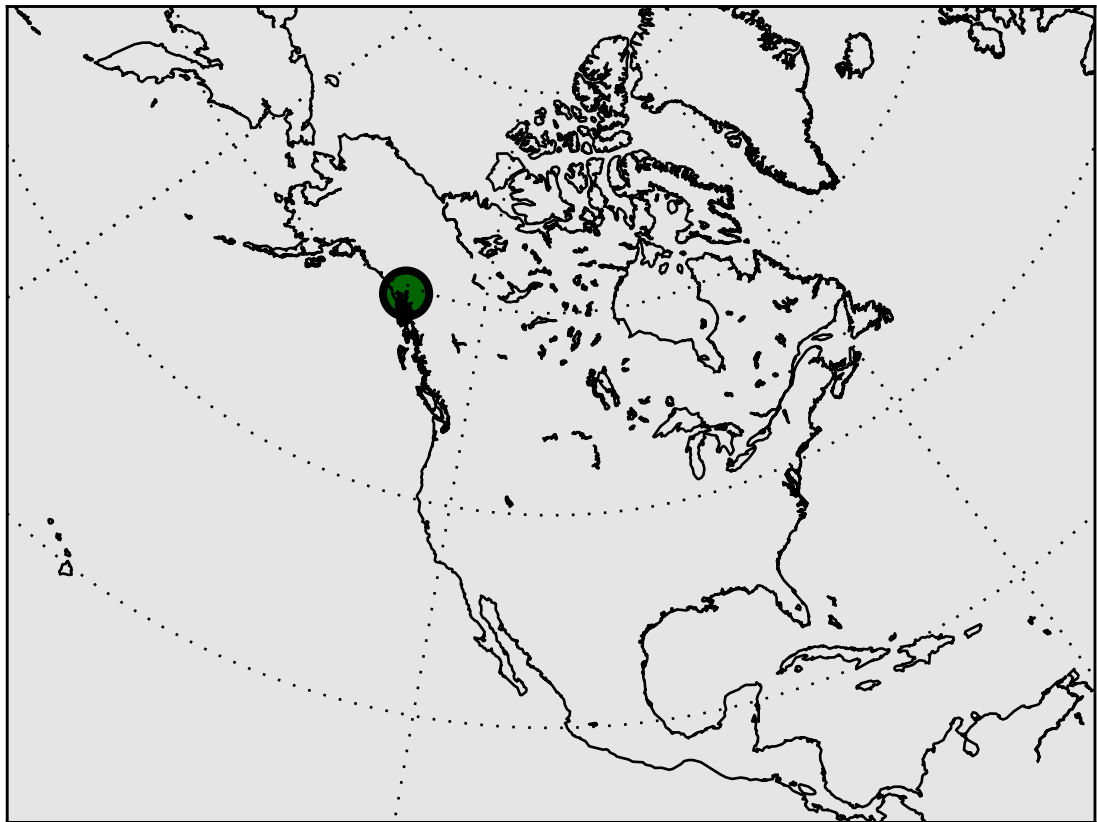

|                    |                                                       |
|--------------------|-------------------------------------------------------|
| Dataset name:      | Lily.Cwynar.1990                                      |
| Archive type:      | LakeSediment                                          |
| Proxy type:        | pollen                                                |
| Variable name:     | temperatureComposite                                  |
| Latitude ( ° N):   | 59.2026                                               |
| Longitude ( ° E):  | -135.3953                                             |
| Elevation (m):     | 230.0                                                 |
| Interp. variable:  | T                                                     |
| Interp. detail:    | air@surface                                           |
| Interp. season:    | annual                                                |
| Interp. direction: | positive                                              |
| Pub. 1 title:      | A late Quaternary vegetation history from Lily Lak... |
| Pub. 1 authors:    | Cwynar, Les C.                                        |
| Pub. 1 year:       | 1990                                                  |
| Pub. 1 DOI:        | 10.1139/b90-139                                       |
| Original data URL: | www.ncdc.noaa.gov/paleo/study/15444                   |

Proxy data and metadata

LakeSediment | pollen | Lily.Cwynar.1990 | WEB39251bbc

Proxy time series: temperature

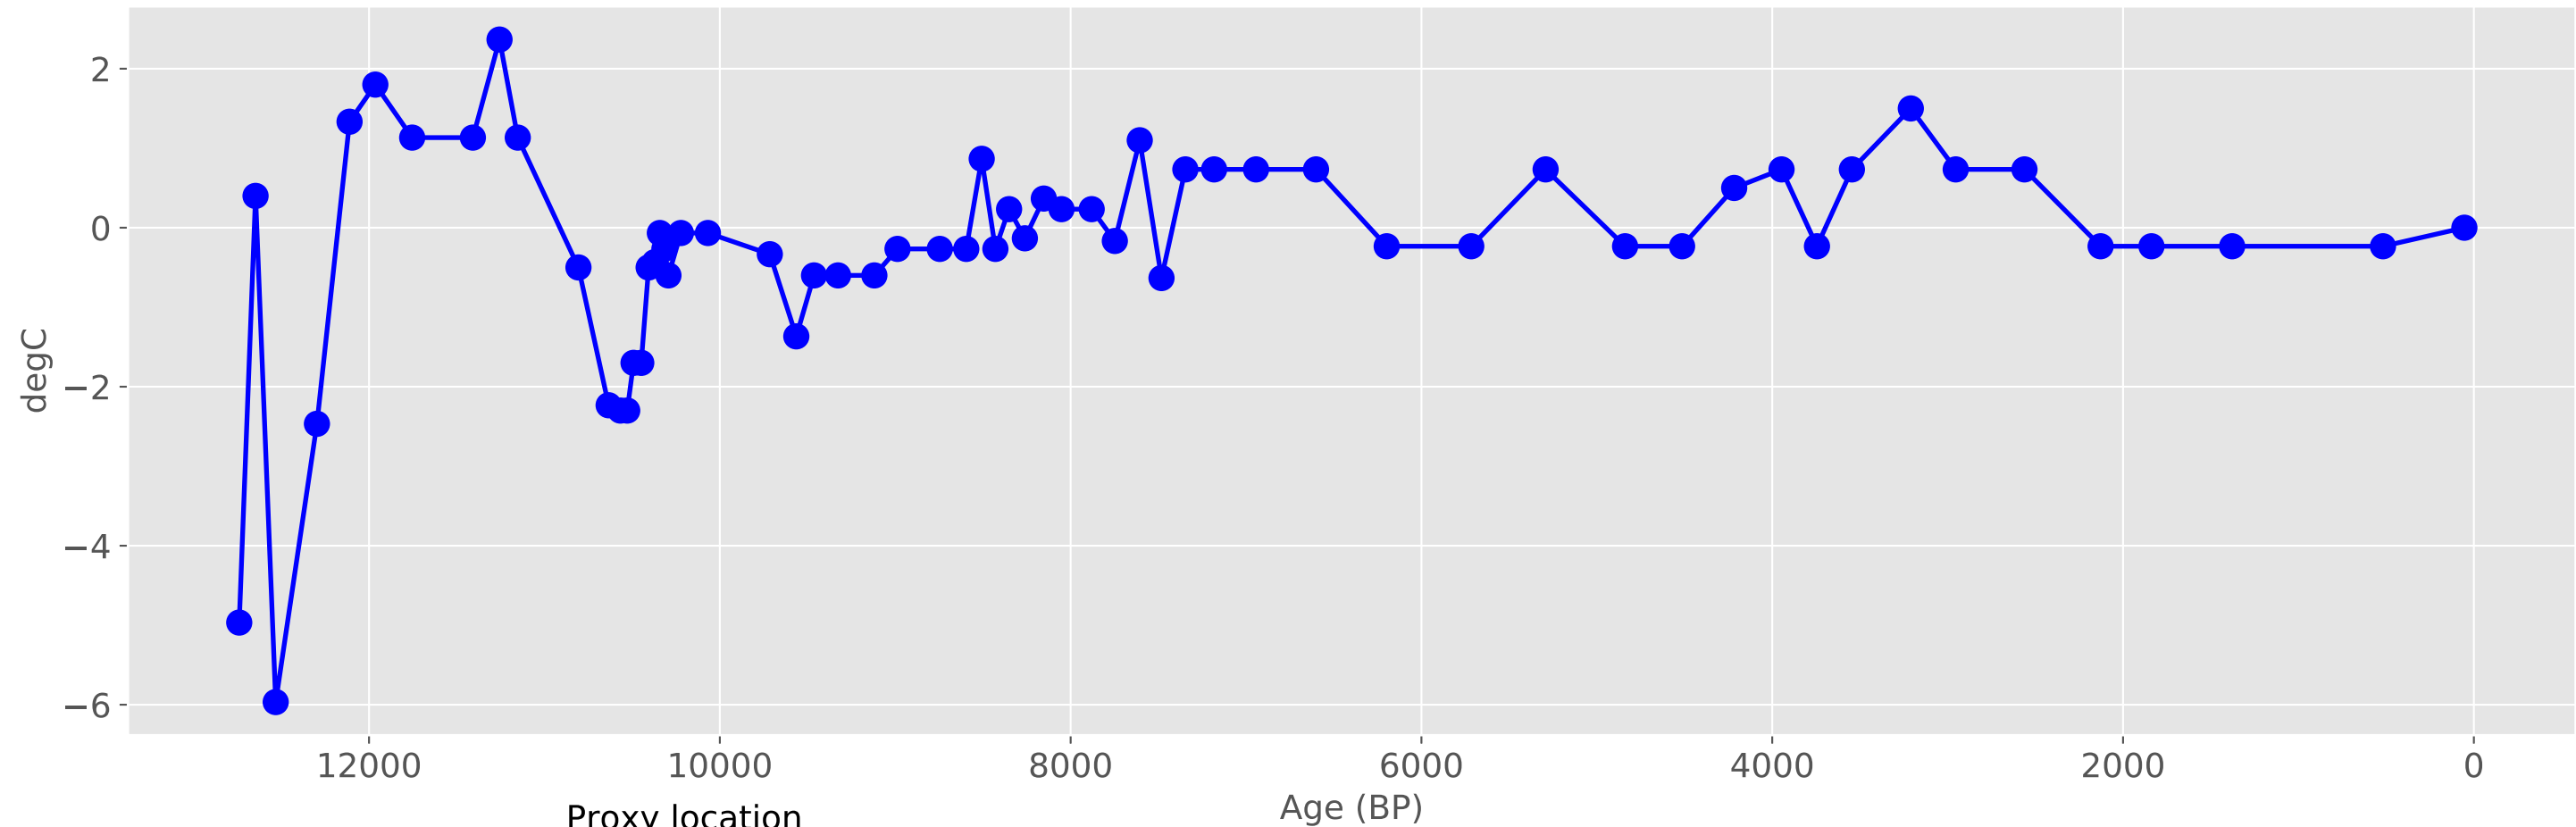

|                    |                                                                                              |
|--------------------|----------------------------------------------------------------------------------------------|
| Dataset name:      | Lily.Cwynar.1990                                                                             |
| Archive type:      | LakeSediment                                                                                 |
| Proxy type:        | pollen                                                                                       |
| Variable name:     | temperature                                                                                  |
| Latitude ( ° N):   | 59.2026                                                                                      |
| Longitude ( ° E):  | -135.3953                                                                                    |
| Elevation (m):     | 230.0                                                                                        |
| Interp. variable:  | T                                                                                            |
| Interp. detail:    | air@surface                                                                                  |
| Interp. season:    | summer+                                                                                      |
| Interp. direction: | positive                                                                                     |
| Pub. 1 title:      | A late Quaternary vegetation history from Lily Lak...                                        |
| Pub. 1 authors:    | Cwynar, Les C.                                                                               |
| Pub. 1 year:       | 1990                                                                                         |
| Pub. 1 DOI:        | 10.1139/b90-139                                                                              |
| Original data URL: | <a href="http://www.ncdc.noaa.gov/paleo/study/15444">www.ncdc.noaa.gov/paleo/study/15444</a> |

Proxy data and metadata

LakeSediment | pollen | LoneFoxLake.MacDonald.1985 | M2L6qbIn98nP

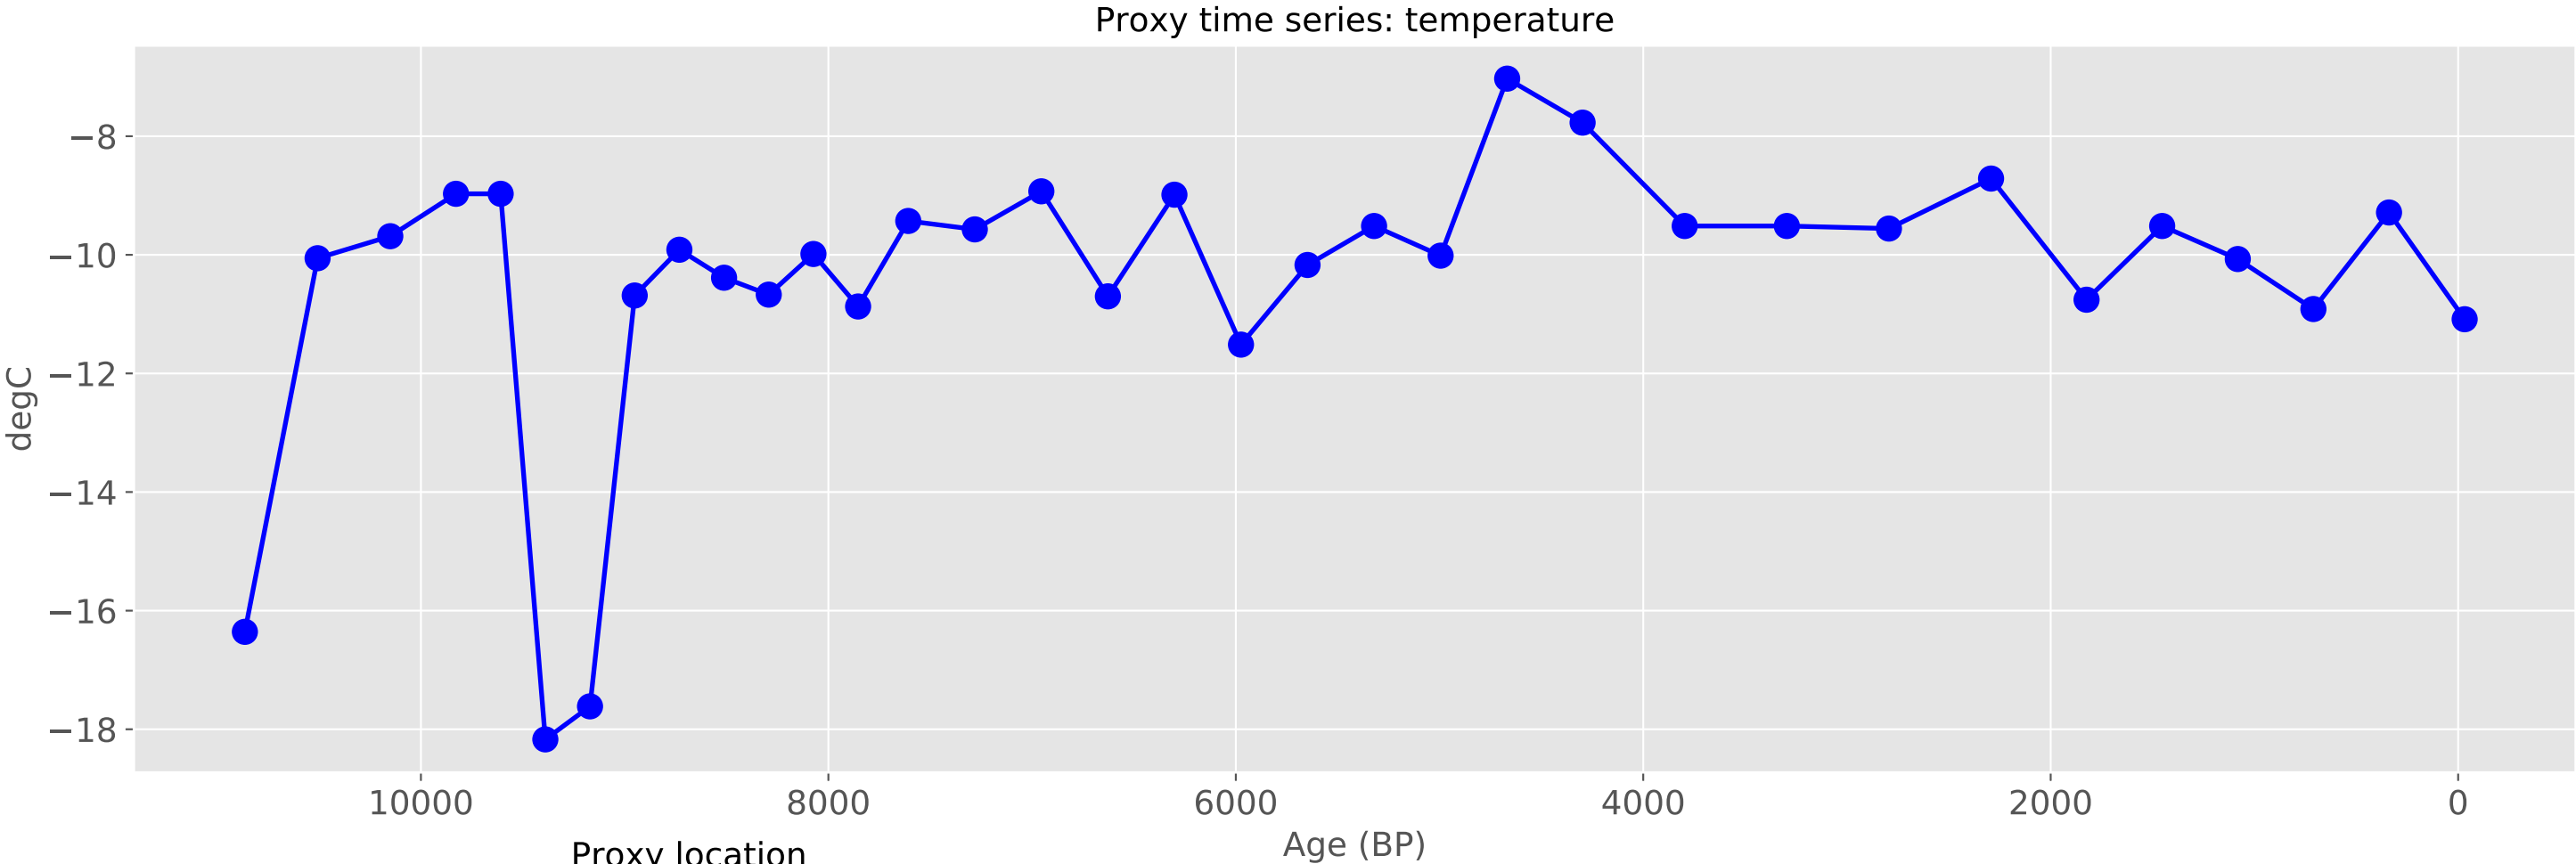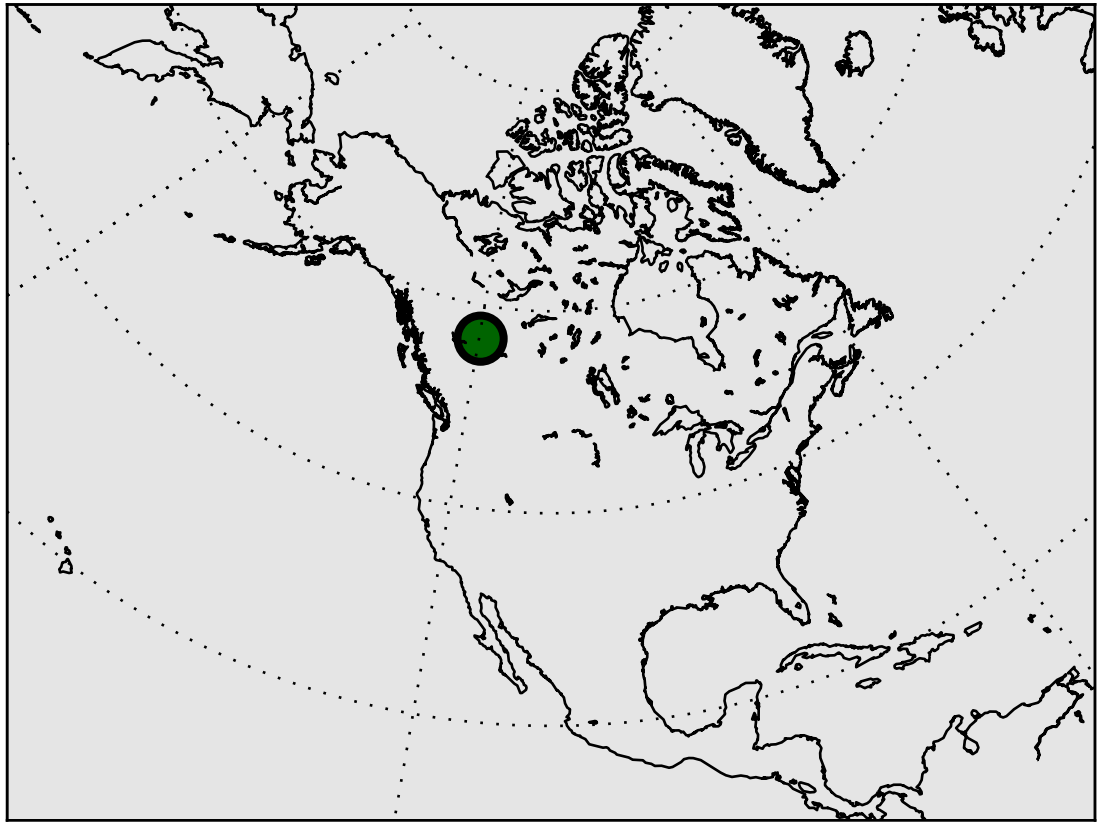

|                    |                                                                                              |
|--------------------|----------------------------------------------------------------------------------------------|
| Dataset name:      | LoneFoxLake.MacDonald.1985                                                                   |
| Archive type:      | LakeSediment                                                                                 |
| Proxy type:        | pollen                                                                                       |
| Variable name:     | temperature                                                                                  |
| Latitude ( ° N):   | 56.72                                                                                        |
| Longitude ( ° E):  | -119.72                                                                                      |
| Elevation (m):     | 1100.0                                                                                       |
| Interp. variable:  | T                                                                                            |
| Interp. detail:    | air@surface                                                                                  |
| Interp. season:    | winter+                                                                                      |
| Interp. direction: | positive                                                                                     |
| Pub. 1 title:      | A fossil pollen based reconstruction of the late Q...                                        |
| Pub. 1 authors:    | MacDonald, Glen M.; Cwynar, Les C.                                                           |
| Pub. 1 year:       | 1985                                                                                         |
| Pub. 1 DOI:        | 10.1139/x85-168                                                                              |
| Original data URL: | <a href="http://www.ncdc.noaa.gov/paleo/study/27330">www.ncdc.noaa.gov/paleo/study/27330</a> |

Proxy data and metadata

LakeSediment | pollen | LoneFoxLake.MacDonald.1985 | M2Lg25dpklhP

Proxy time series: temperature

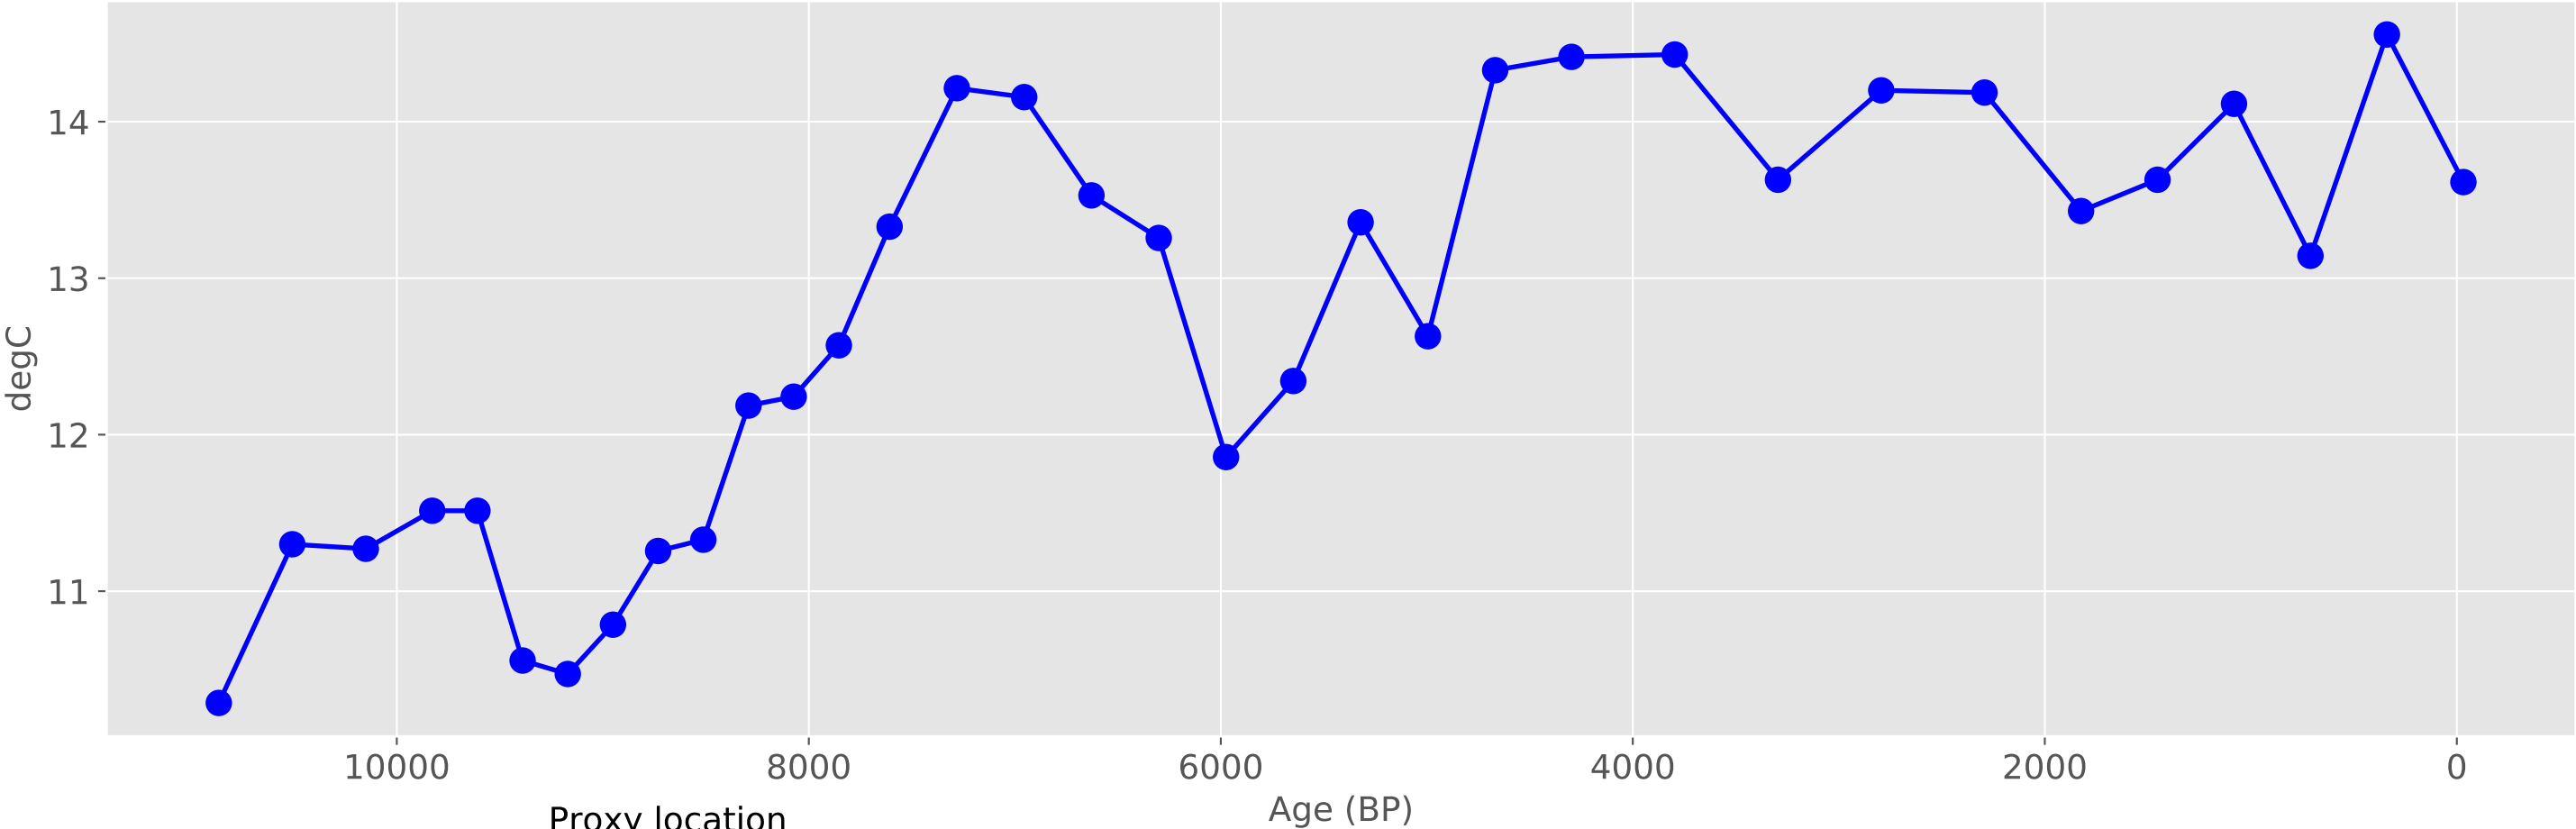

Proxy location  
(56.72 ° N, 119.72 ° W)

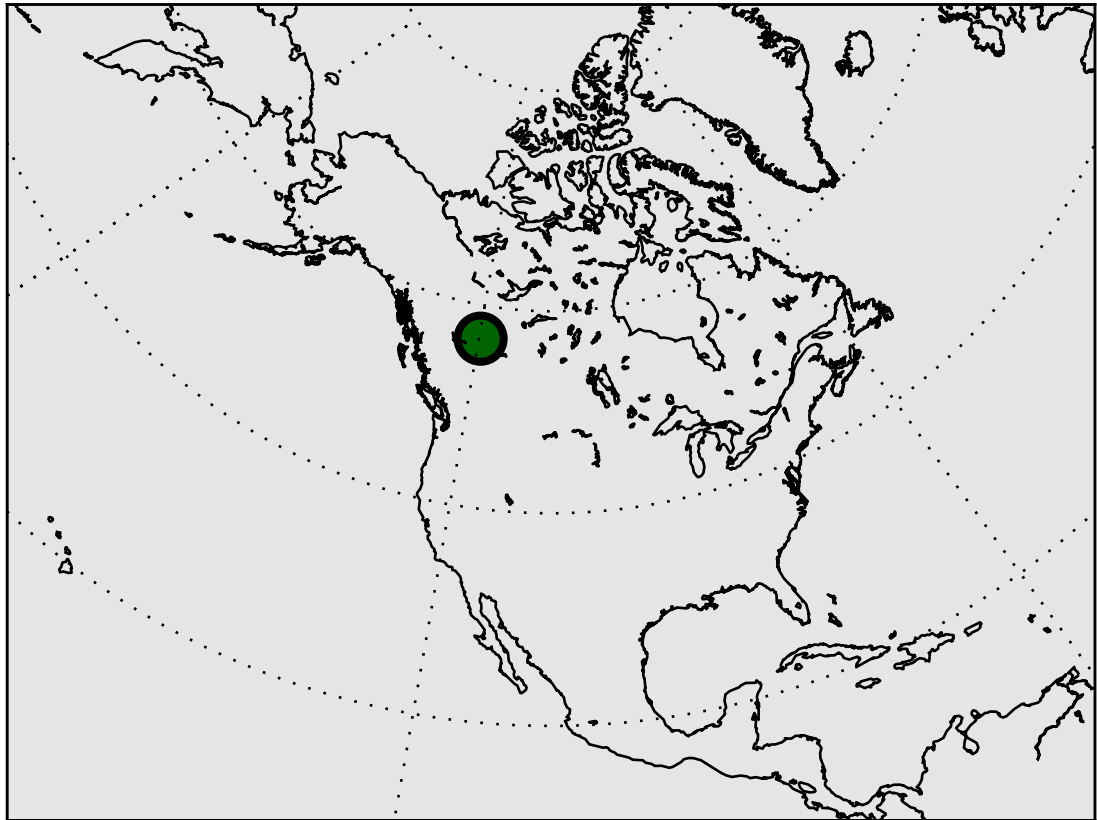

|                    |                                                                                              |
|--------------------|----------------------------------------------------------------------------------------------|
| Dataset name:      | LoneFoxLake.MacDonald.1985                                                                   |
| Archive type:      | LakeSediment                                                                                 |
| Proxy type:        | pollen                                                                                       |
| Variable name:     | temperature                                                                                  |
| Latitude ( ° N):   | 56.72                                                                                        |
| Longitude ( ° E):  | -119.72                                                                                      |
| Elevation (m):     | 1100.0                                                                                       |
| Interp. variable:  | T                                                                                            |
| Interp. detail:    | air@surface                                                                                  |
| Interp. season:    | summer+                                                                                      |
| Interp. direction: | positive                                                                                     |
| Pub. 1 title:      | A fossil pollen based reconstruction of the late Q...                                        |
| Pub. 1 authors:    | MacDonald, Glen M.; Cwynar, Les C.                                                           |
| Pub. 1 year:       | 1985                                                                                         |
| Pub. 1 DOI:        | 10.1139/x85-168                                                                              |
| Original data URL: | <a href="http://www.ncdc.noaa.gov/paleo/study/27330">www.ncdc.noaa.gov/paleo/study/27330</a> |

Proxy data and metadata

LakeSediment | pollen | LoneFoxLake.MacDonald.1985 | M2Lpv8aaeszP

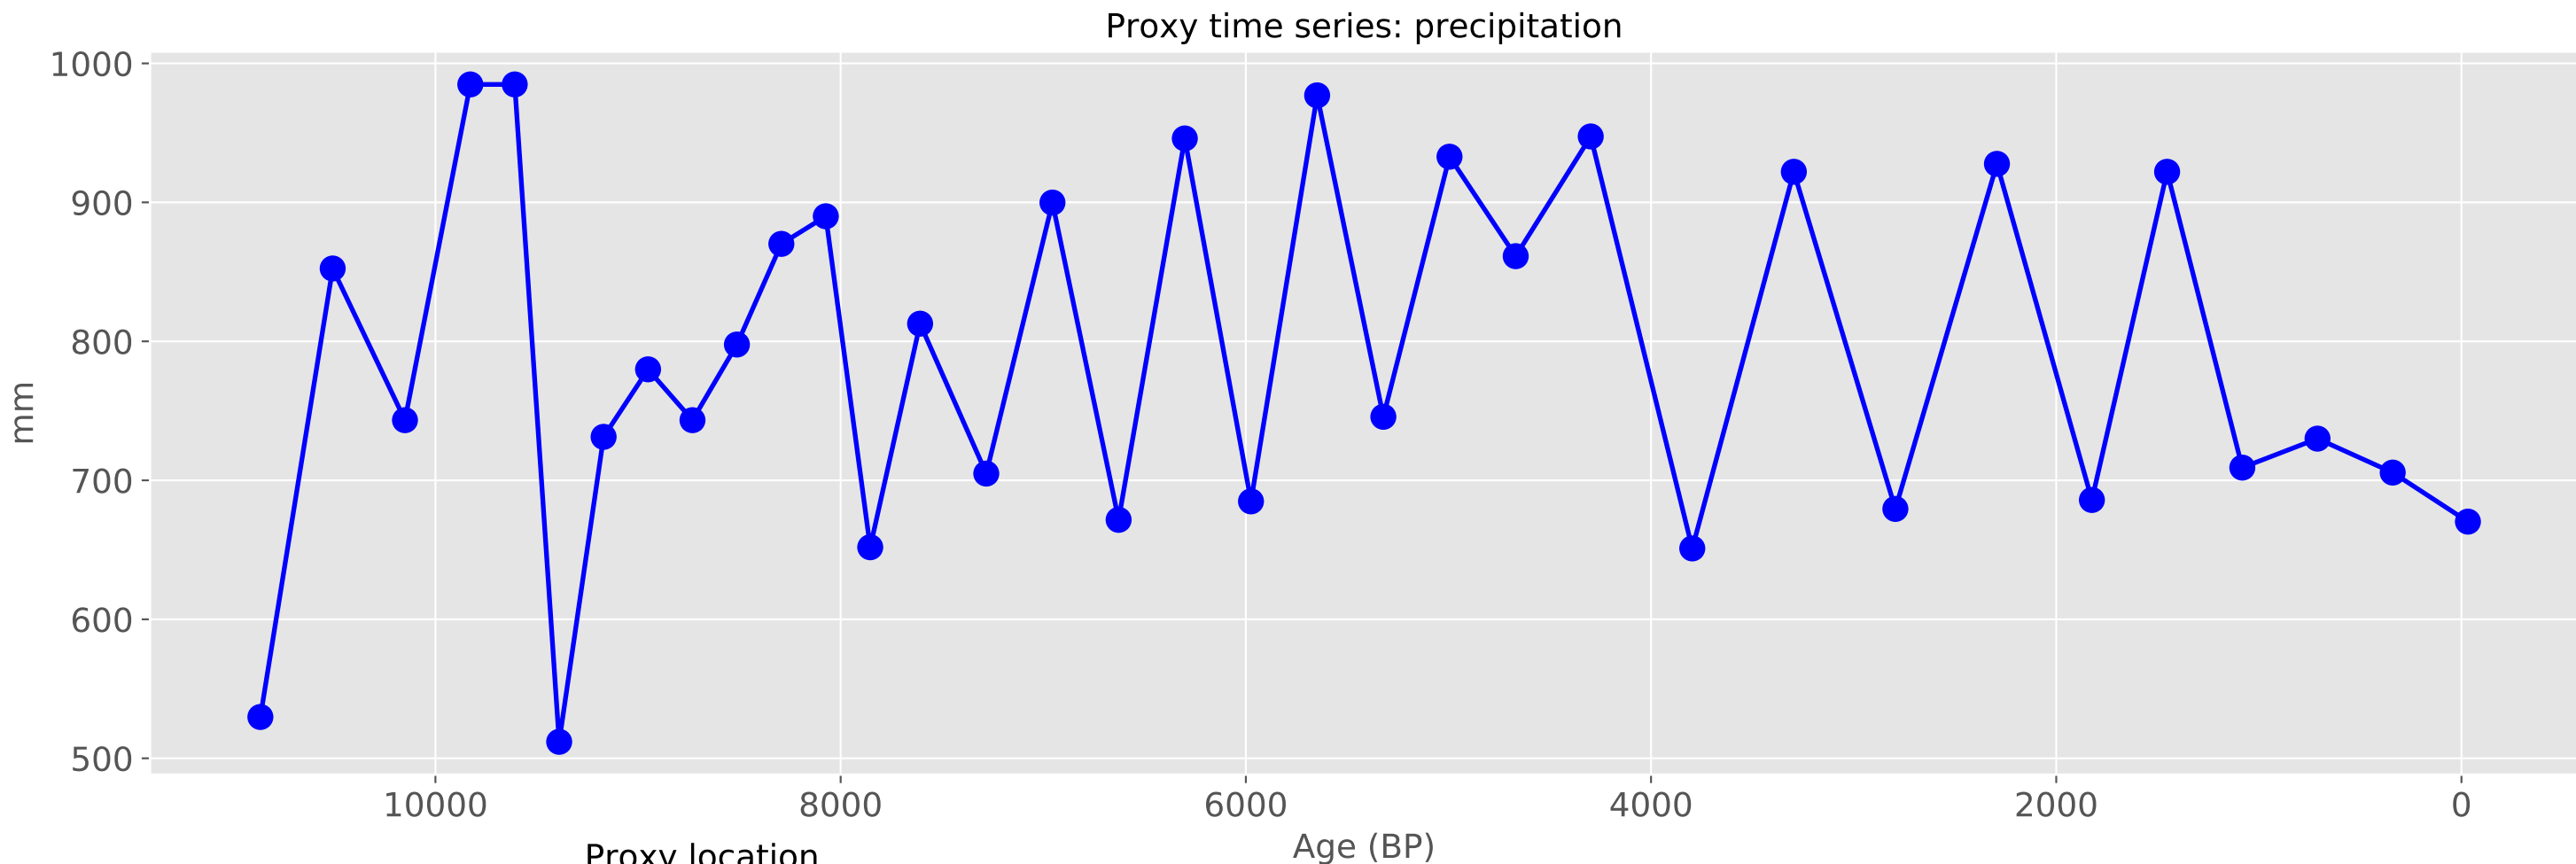

Proxy location  
(56.72 ° N, 119.72 ° W)

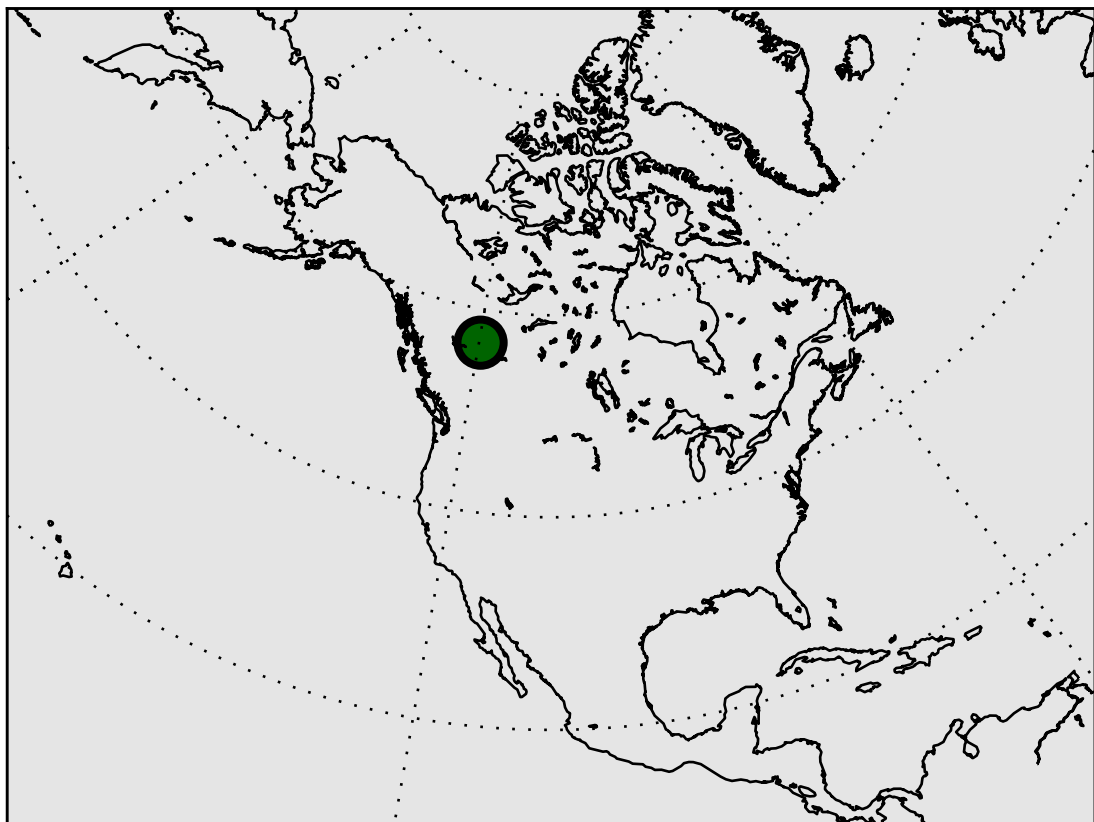

|                    |                                                                                              |
|--------------------|----------------------------------------------------------------------------------------------|
| Dataset name:      | LoneFoxLake.MacDonald.1985                                                                   |
| Archive type:      | LakeSediment                                                                                 |
| Proxy type:        | pollen                                                                                       |
| Variable name:     | precipitation                                                                                |
| Latitude ( ° N):   | 56.72                                                                                        |
| Longitude ( ° E):  | -119.72                                                                                      |
| Elevation (m):     | 1100.0                                                                                       |
| Interp. variable:  | P                                                                                            |
| Interp. detail:    | amount@surface                                                                               |
| Interp. season:    | annual                                                                                       |
| Interp. direction: | positive                                                                                     |
| Pub. 1 title:      | A fossil pollen based reconstruction of the late Q...                                        |
| Pub. 1 authors:    | MacDonald, Glen M.; Cwynar, Les C.                                                           |
| Pub. 1 year:       | 1985                                                                                         |
| Pub. 1 DOI:        | 10.1139/x85-168                                                                              |
| Original data URL: | <a href="http://www.ncdc.noaa.gov/paleo/study/27330">www.ncdc.noaa.gov/paleo/study/27330</a> |



Proxy data and metadata  
LakeSediment | pollen | LoneFoxLake.MacDonald.1985 | M2Lvvf8aywtP

Proxy time series: temperature

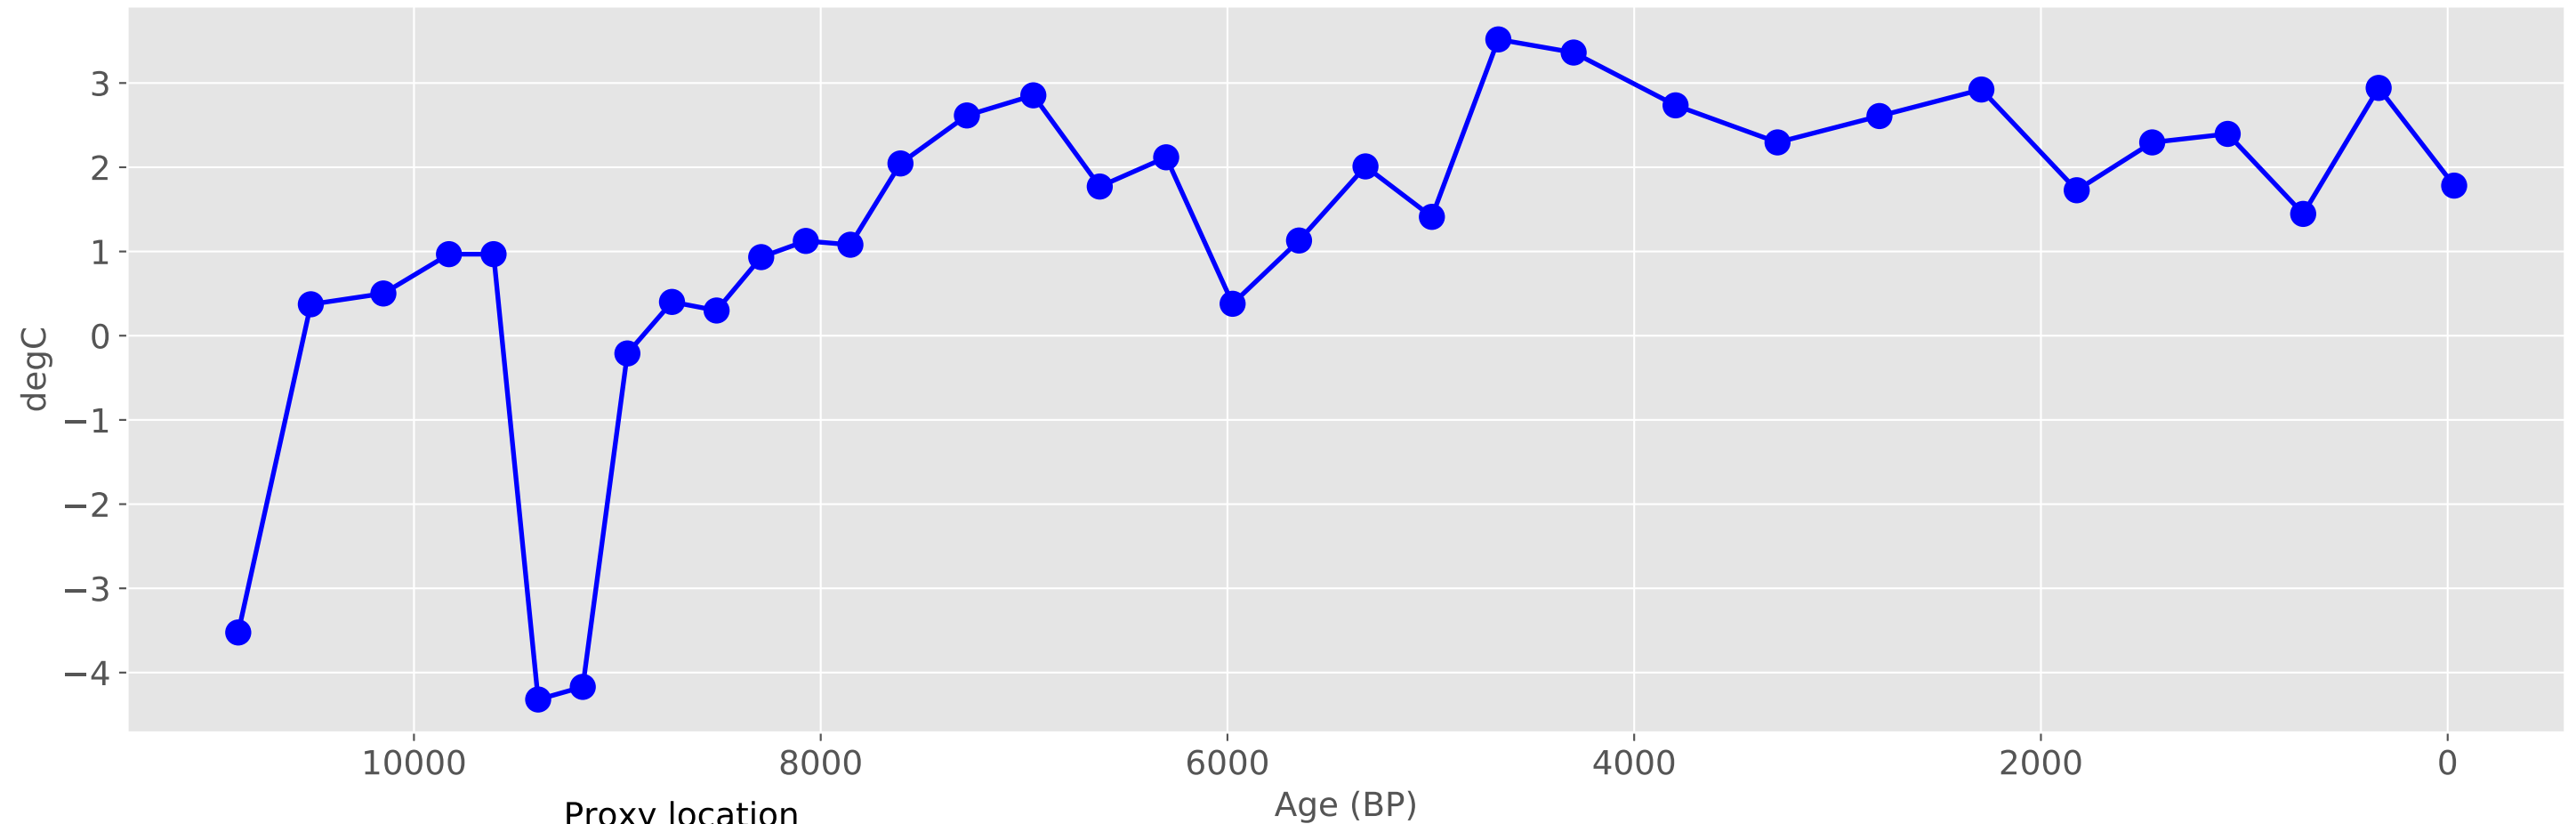

Proxy location  
(56.72 ° N, 119.72 ° W)

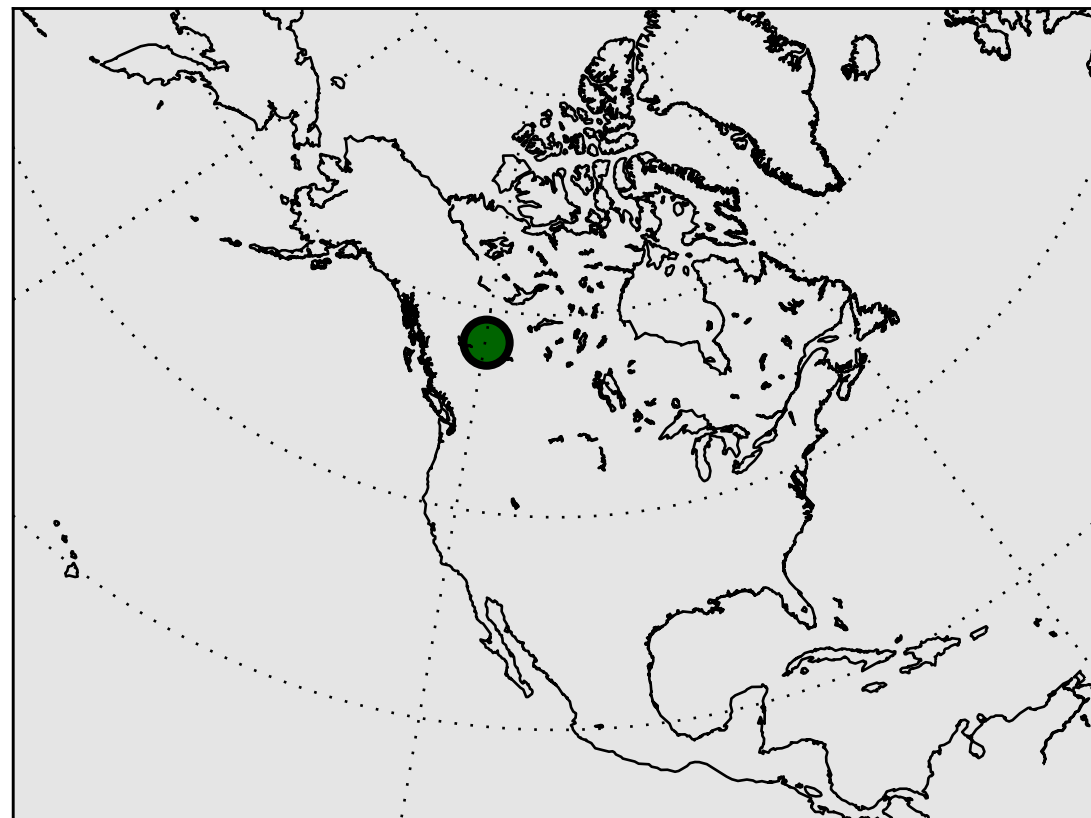

|                    |                                                                                              |
|--------------------|----------------------------------------------------------------------------------------------|
| Dataset name:      | LoneFoxLake.MacDonald.1985                                                                   |
| Archive type:      | LakeSediment                                                                                 |
| Proxy type:        | pollen                                                                                       |
| Variable name:     | temperature                                                                                  |
| Latitude ( ° N):   | 56.72                                                                                        |
| Longitude ( ° E):  | -119.72                                                                                      |
| Elevation (m):     | 1100.0                                                                                       |
| Interp. variable:  | T                                                                                            |
| Interp. detail:    | air@surface                                                                                  |
| Interp. season:    | annual                                                                                       |
| Interp. direction: | positive                                                                                     |
| Pub. 1 title:      | A fossil pollen based reconstruction of the late Q...                                        |
| Pub. 1 authors:    | MacDonald, Glen M.; Cwynar, Les C.                                                           |
| Pub. 1 year:       | 1985                                                                                         |
| Pub. 1 DOI:        | 10.1139/x85-168                                                                              |
| Original data URL: | <a href="http://www.ncdc.noaa.gov/paleo/study/27330">www.ncdc.noaa.gov/paleo/study/27330</a> |

Proxy data and metadata  
LakeSediment | pollen | Boone.White.1986 | M2L53380ivpP

Proxy time series: precipitation

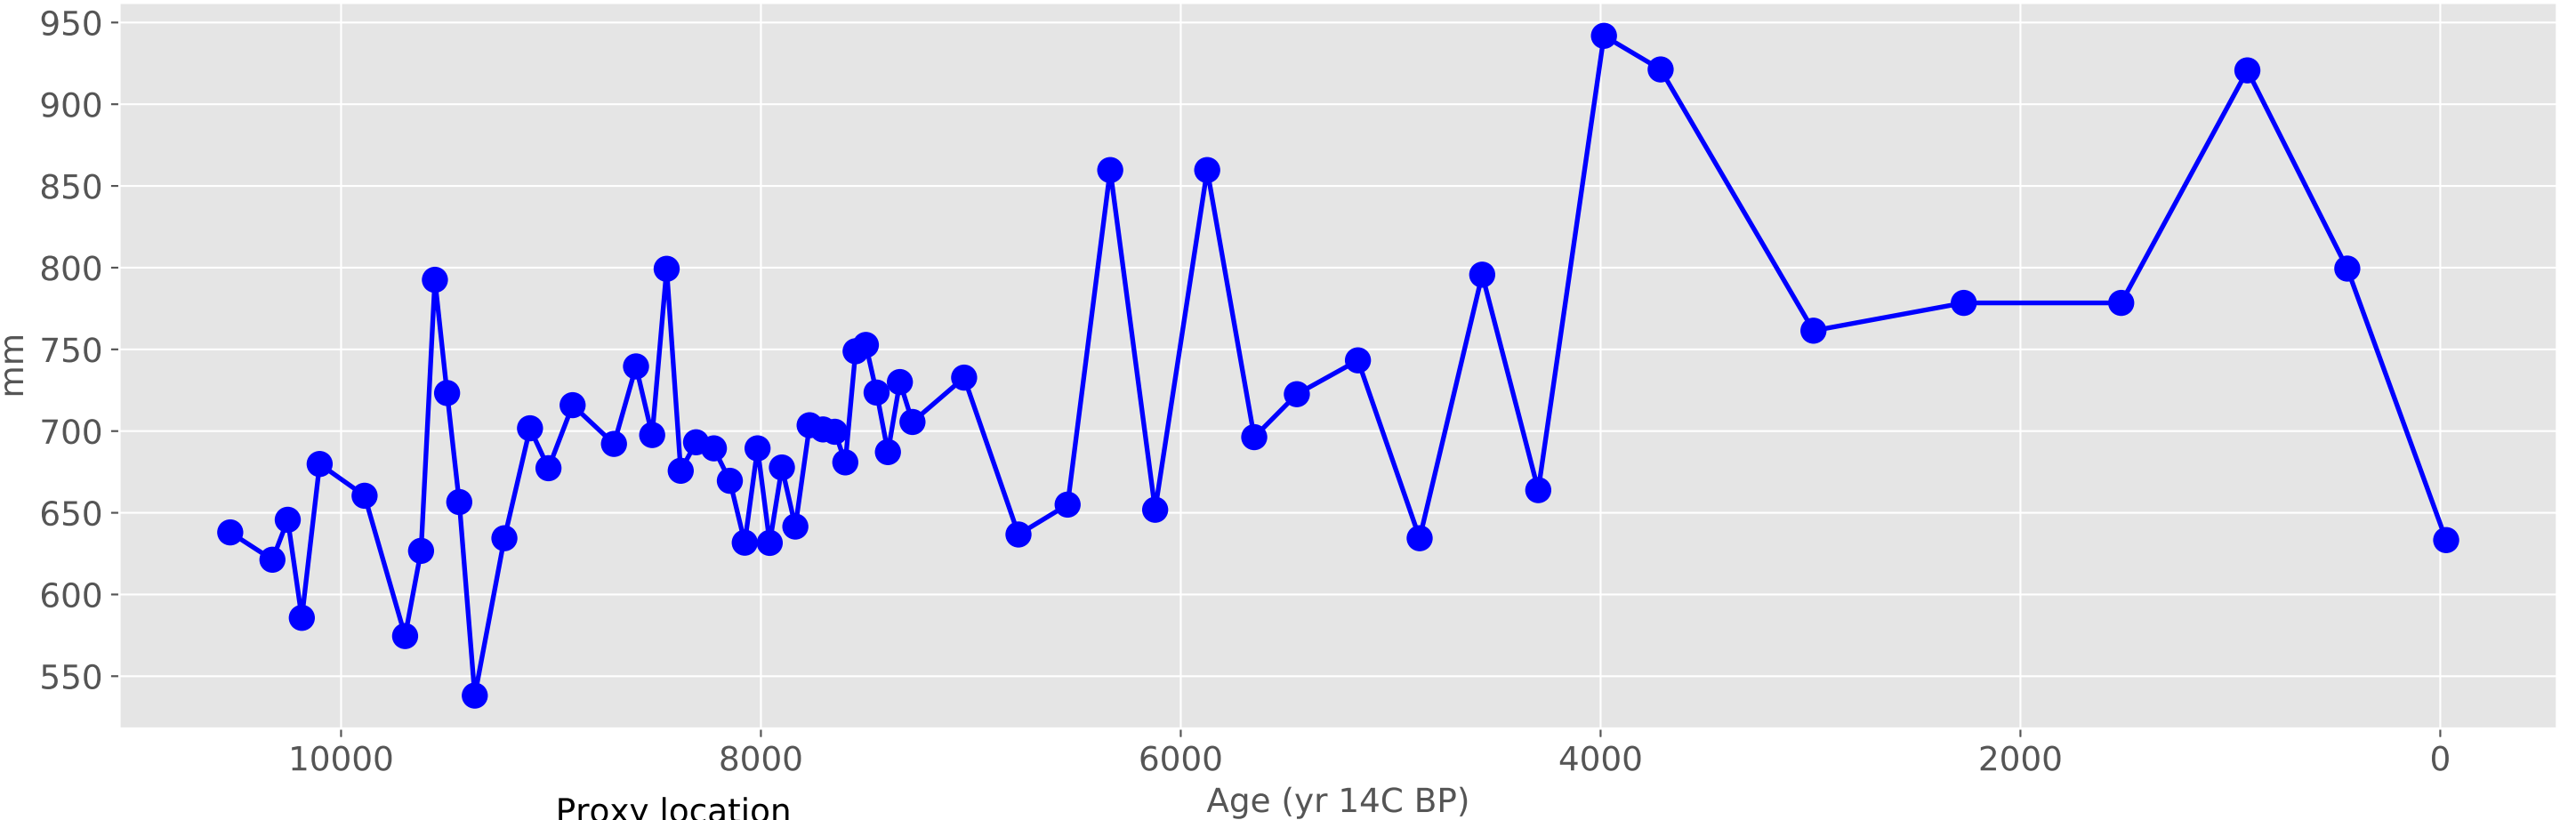

Proxy location  
(55.58 ° N, 119.43 ° W)

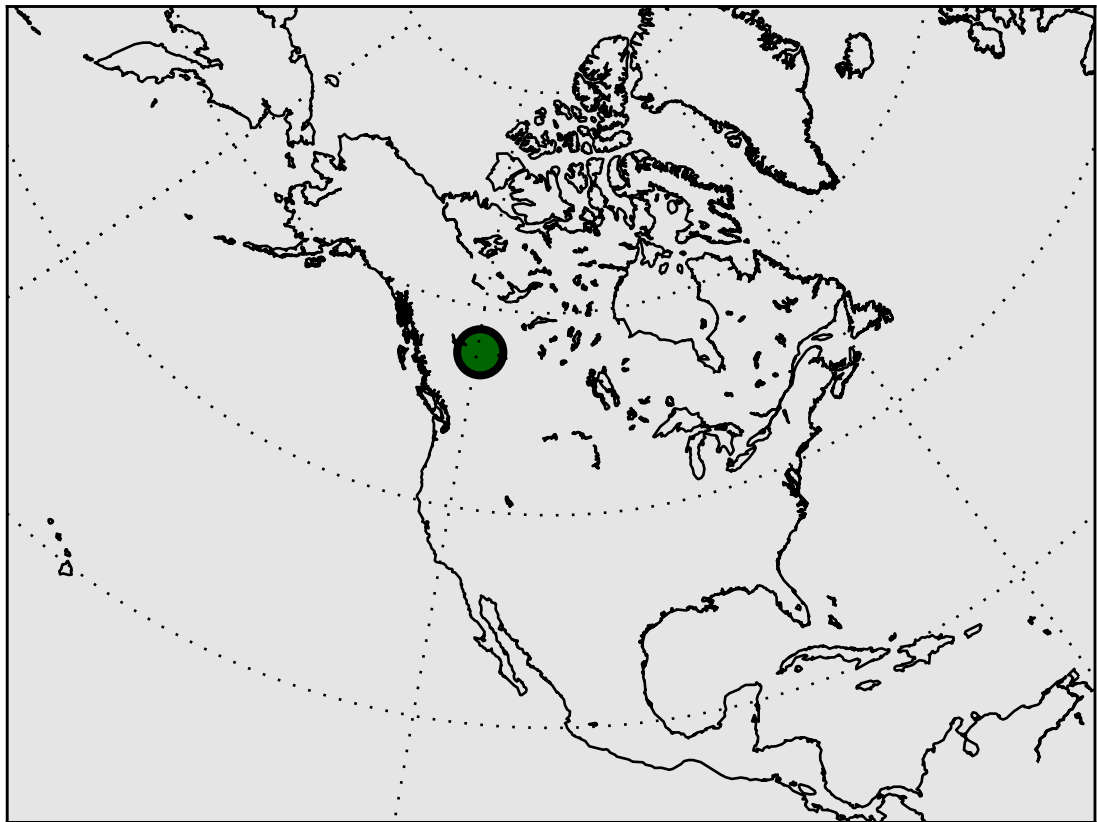

|                    |                                                                                              |
|--------------------|----------------------------------------------------------------------------------------------|
| Dataset name:      | Boone.White.1986                                                                             |
| Archive type:      | LakeSediment                                                                                 |
| Proxy type:        | pollen                                                                                       |
| Variable name:     | precipitation                                                                                |
| Latitude ( ° N):   | 55.58                                                                                        |
| Longitude ( ° E):  | -119.43                                                                                      |
| Elevation (m):     | 872.0                                                                                        |
| Interp. variable:  | P                                                                                            |
| Interp. detail:    | amount@surface                                                                               |
| Interp. season:    | annual                                                                                       |
| Interp. direction: | positive                                                                                     |
| Pub. 1 title:      | Postglacial vegetation and climatic change in the ...                                        |
| Pub. 1 authors:    | White, James M.; Mathewes, Rolf W.                                                           |
| Pub. 1 year:       | 1986                                                                                         |
| Pub. 1 DOI:        | 10.1139/b86-302                                                                              |
| Original data URL: | <a href="http://www.ncdc.noaa.gov/paleo/study/27330">www.ncdc.noaa.gov/paleo/study/27330</a> |

Proxy data and metadata  
LakeSediment | pollen | Boone.White.1986 | M2Lp5wggipyP

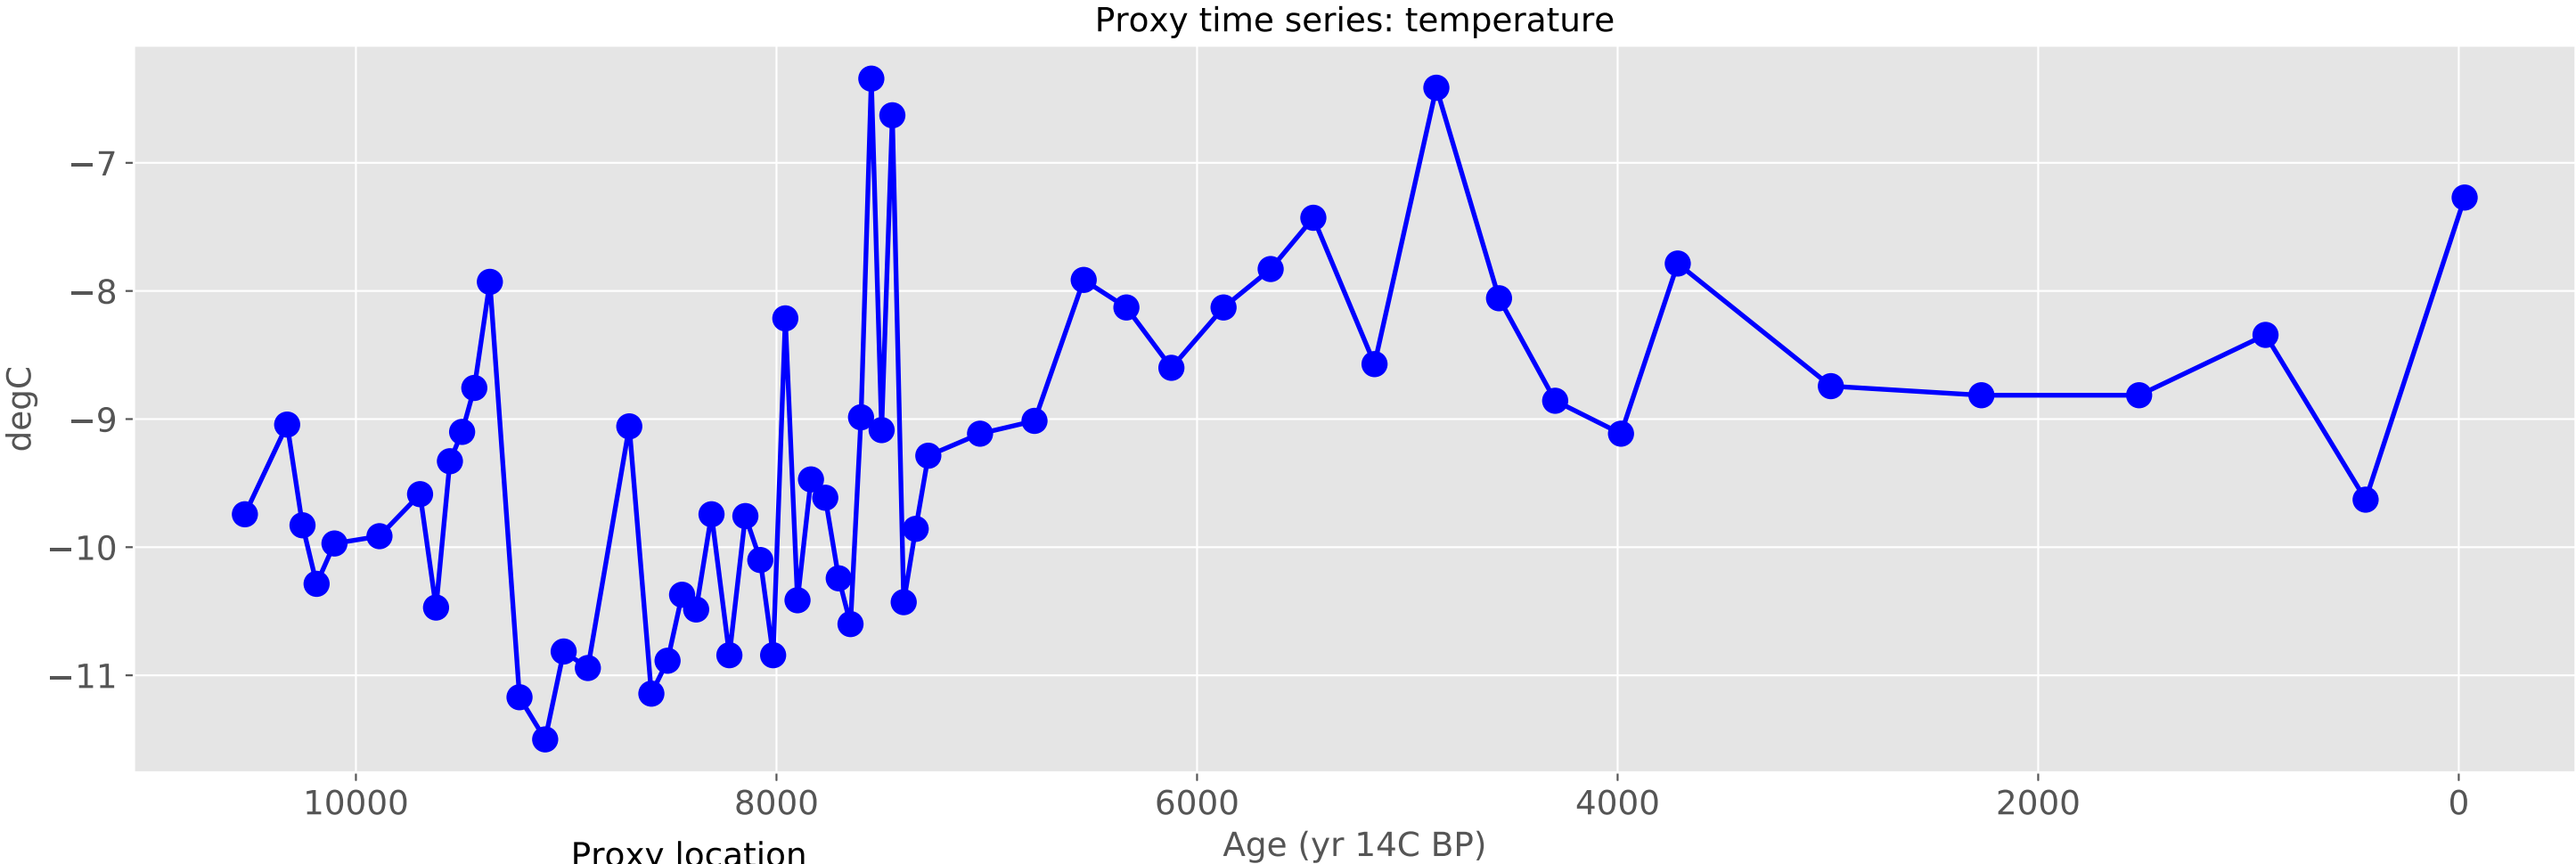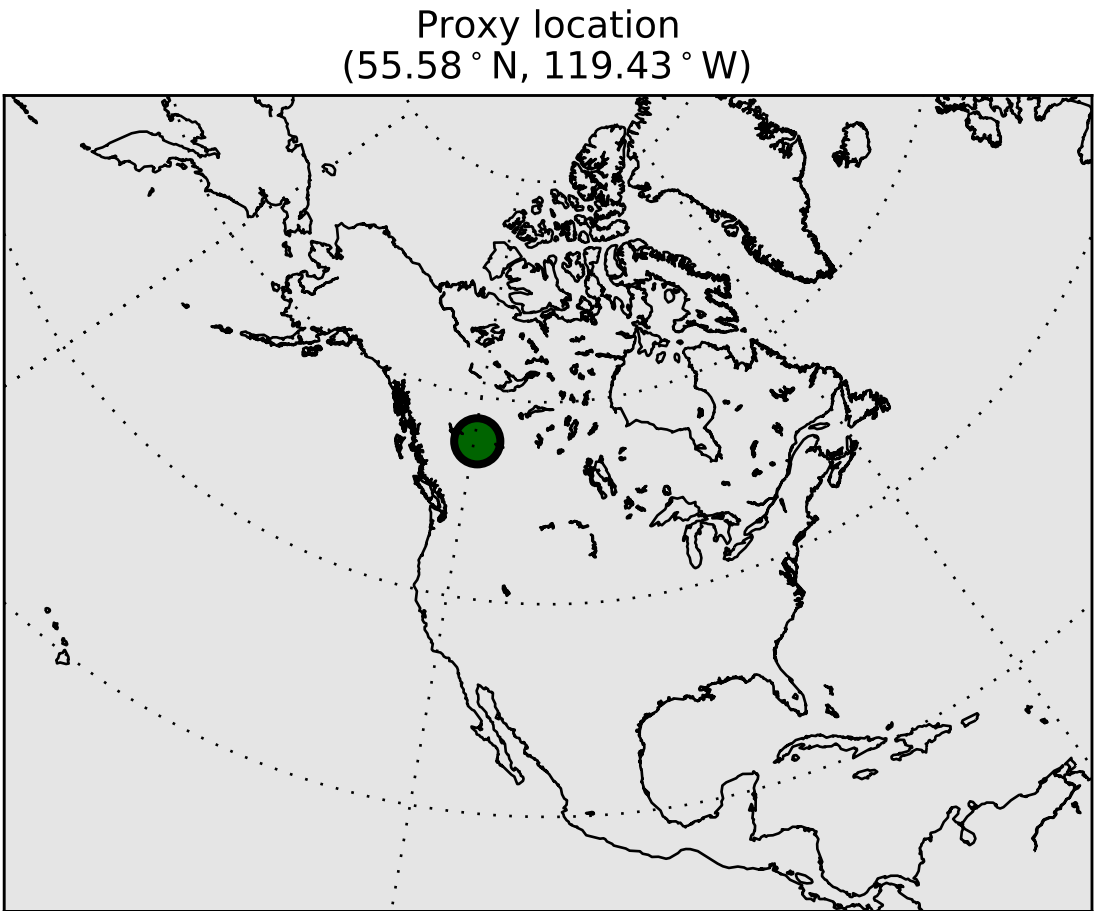

|                    |                                                                                              |
|--------------------|----------------------------------------------------------------------------------------------|
| Dataset name:      | Boone.White.1986                                                                             |
| Archive type:      | LakeSediment                                                                                 |
| Proxy type:        | pollen                                                                                       |
| Variable name:     | temperature                                                                                  |
| Latitude ( ° N):   | 55.58                                                                                        |
| Longitude ( ° E):  | -119.43                                                                                      |
| Elevation (m):     | 872.0                                                                                        |
| Interp. variable:  | T                                                                                            |
| Interp. detail:    | air@surface                                                                                  |
| Interp. season:    | winter+                                                                                      |
| Interp. direction: | positive                                                                                     |
| Pub. 1 title:      | Postglacial vegetation and climatic change in the ...                                        |
| Pub. 1 authors:    | White, James M.; Mathewes, Rolf W.                                                           |
| Pub. 1 year:       | 1986                                                                                         |
| Pub. 1 DOI:        | 10.1139/b86-302                                                                              |
| Original data URL: | <a href="http://www.ncdc.noaa.gov/paleo/study/27330">www.ncdc.noaa.gov/paleo/study/27330</a> |

Proxy data and metadata  
LakeSediment | pollen | Boone.White.1986 | M2Lxytve3doP

Proxy time series: temperature

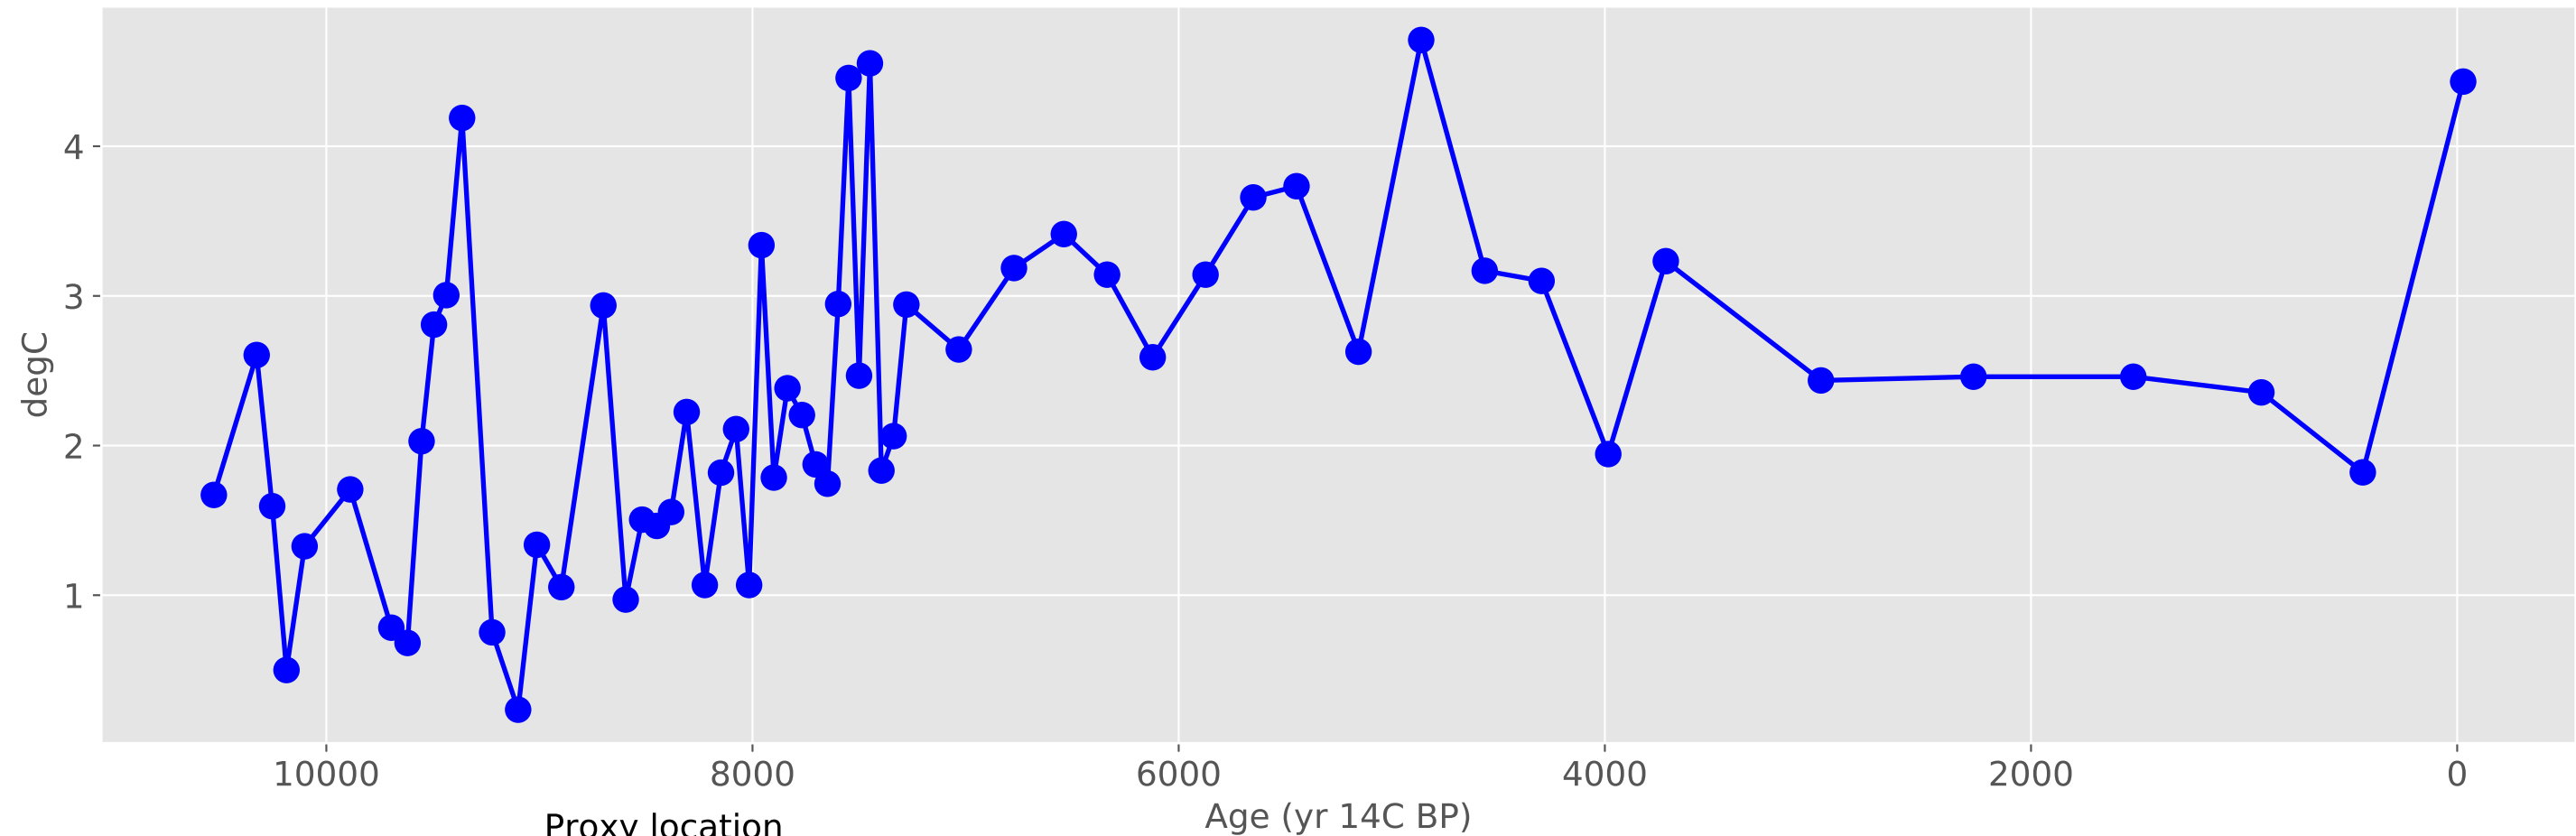

Proxy location  
(55.58 ° N, 119.43 ° W)

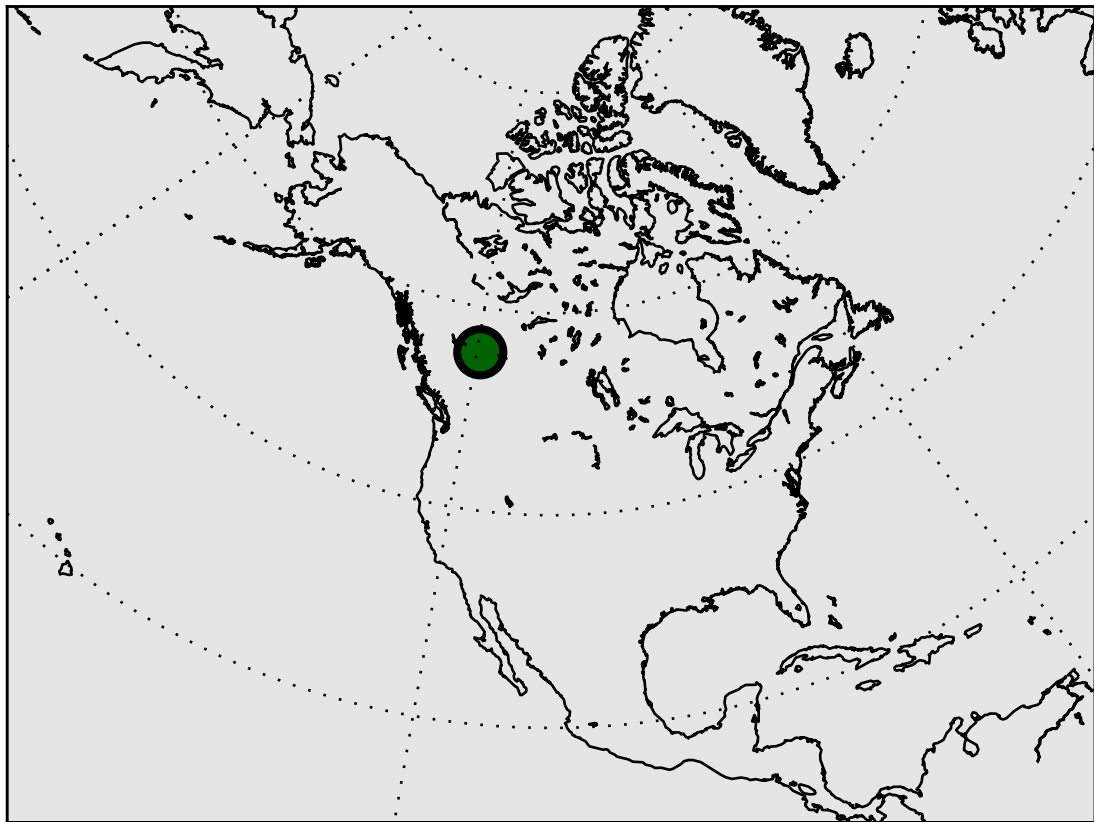

|                    |                                                                                              |
|--------------------|----------------------------------------------------------------------------------------------|
| Dataset name:      | Boone.White.1986                                                                             |
| Archive type:      | LakeSediment                                                                                 |
| Proxy type:        | pollen                                                                                       |
| Variable name:     | temperature                                                                                  |
| Latitude ( ° N):   | 55.58                                                                                        |
| Longitude ( ° E):  | -119.43                                                                                      |
| Elevation (m):     | 872.0                                                                                        |
| Interp. variable:  | T                                                                                            |
| Interp. detail:    | air@surface                                                                                  |
| Interp. season:    | annual                                                                                       |
| Interp. direction: | positive                                                                                     |
| Pub. 1 title:      | Postglacial vegetation and climatic change in the ...                                        |
| Pub. 1 authors:    | White, James M.; Mathewes, Rolf W.                                                           |
| Pub. 1 year:       | 1986                                                                                         |
| Pub. 1 DOI:        | 10.1139/b86-302                                                                              |
| Original data URL: | <a href="http://www.ncdc.noaa.gov/paleo/study/27330">www.ncdc.noaa.gov/paleo/study/27330</a> |

Proxy data and metadata  
LakeSediment | pollen | Boone.White.1986 | M2LzulrgduaP

Proxy time series: temperature

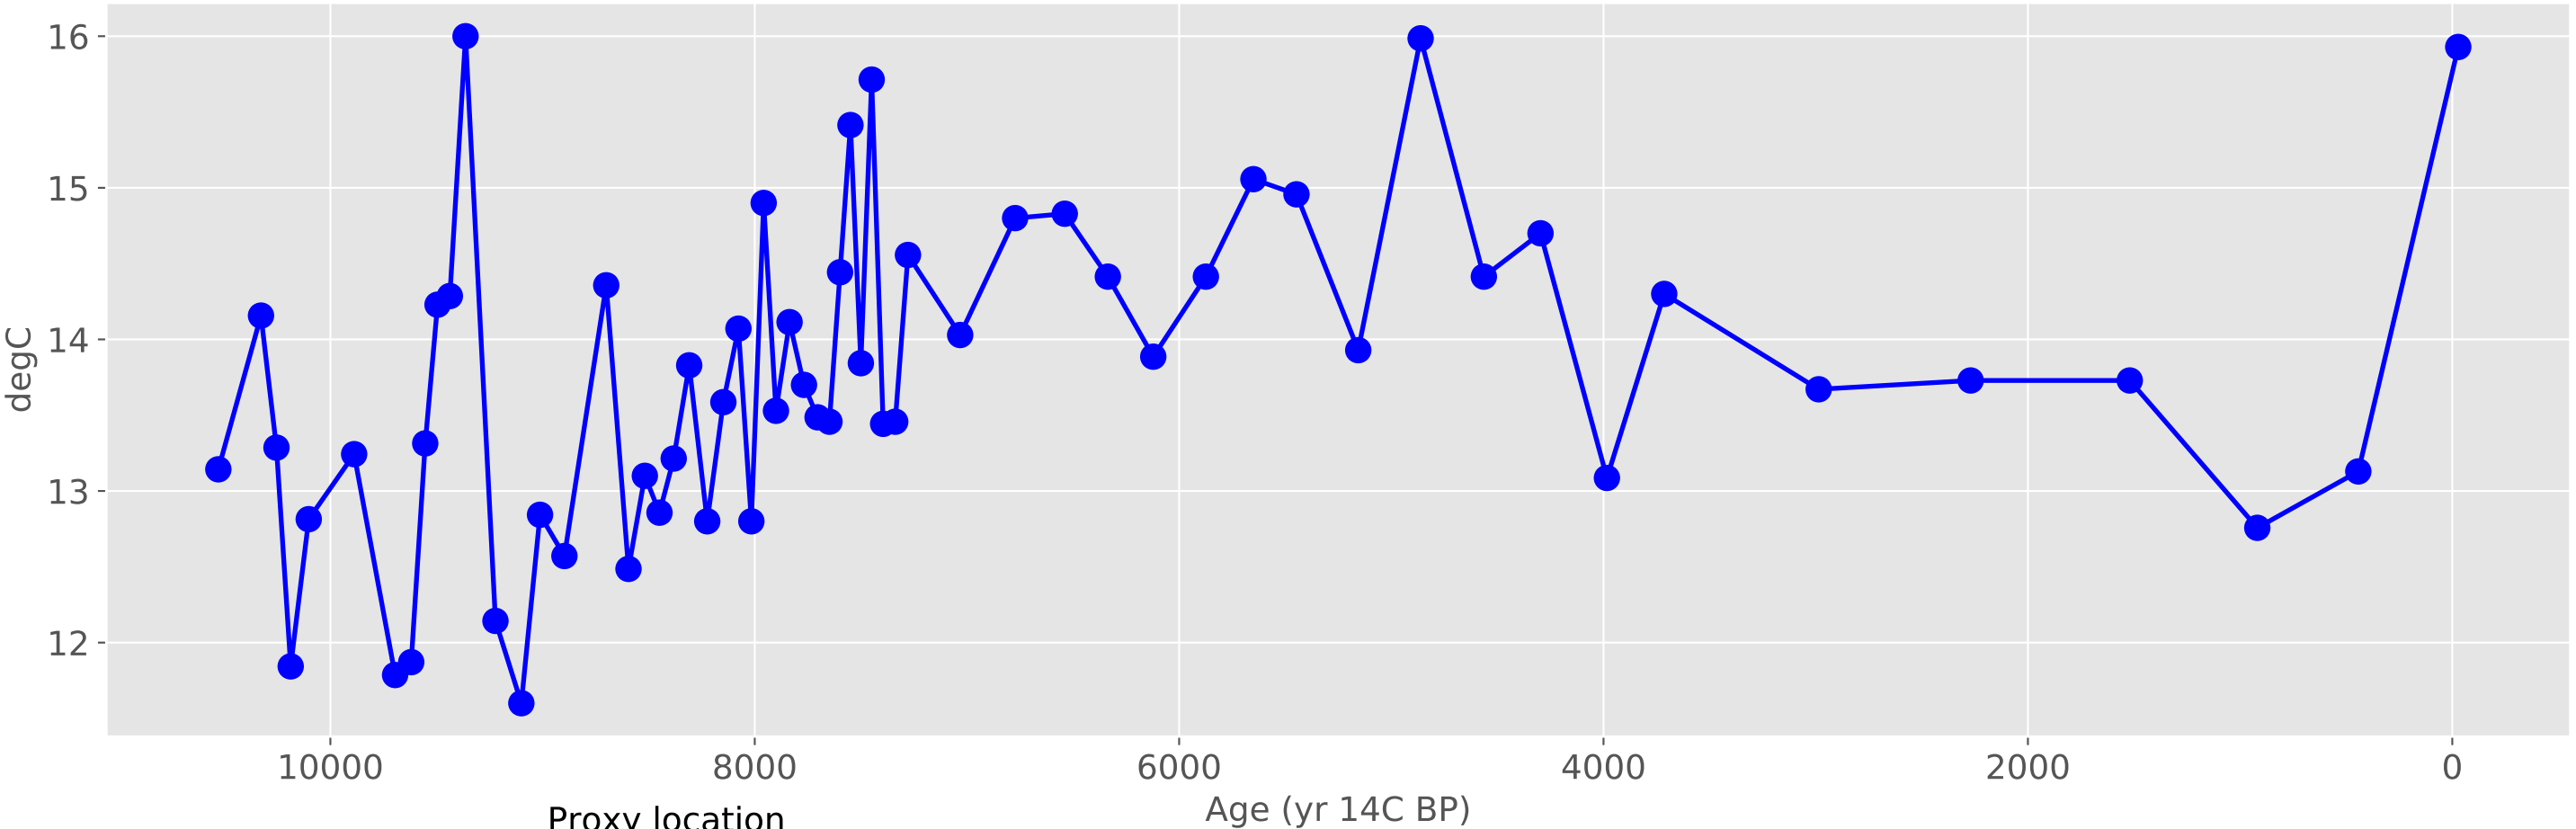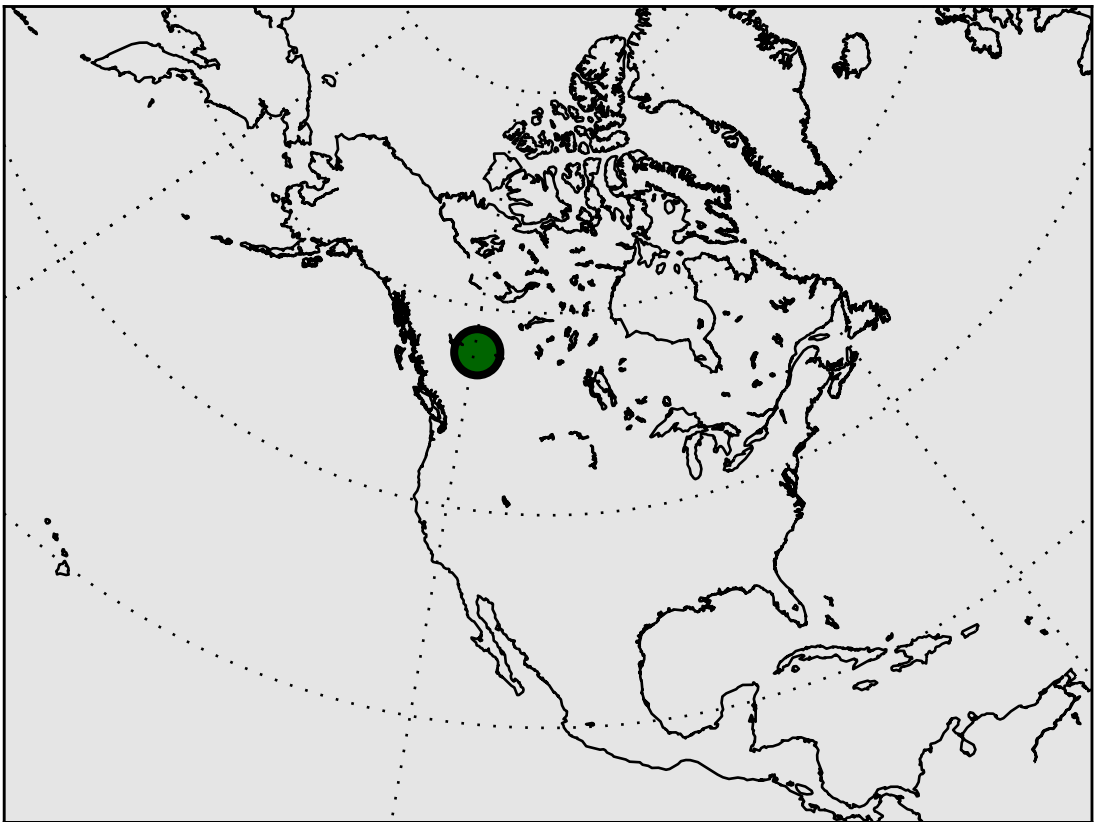

|                    |                                                       |
|--------------------|-------------------------------------------------------|
| Dataset name:      | Boone.White.1986                                      |
| Archive type:      | LakeSediment                                          |
| Proxy type:        | pollen                                                |
| Variable name:     | temperature                                           |
| Latitude ( ° N):   | 55.58                                                 |
| Longitude ( ° E):  | -119.43                                               |
| Elevation (m):     | 872.0                                                 |
| Interp. variable:  | T                                                     |
| Interp. detail:    | air@surface                                           |
| Interp. season:    | summer+                                               |
| Interp. direction: | positive                                              |
| Pub. 1 title:      | Postglacial vegetation and climatic change in the ... |
| Pub. 1 authors:    | White, James M.; Mathewes, Rolf W.                    |
| Pub. 1 year:       | 1986                                                  |
| Pub. 1 DOI:        | 10.1139/b86-302                                       |
| Original data URL: | www.ncdc.noaa.gov/paleo/study/27330                   |

Proxy data and metadata

LakeSediment | pollen | LouisePond.Mathewes.1994 | M2L8oedfsdzP

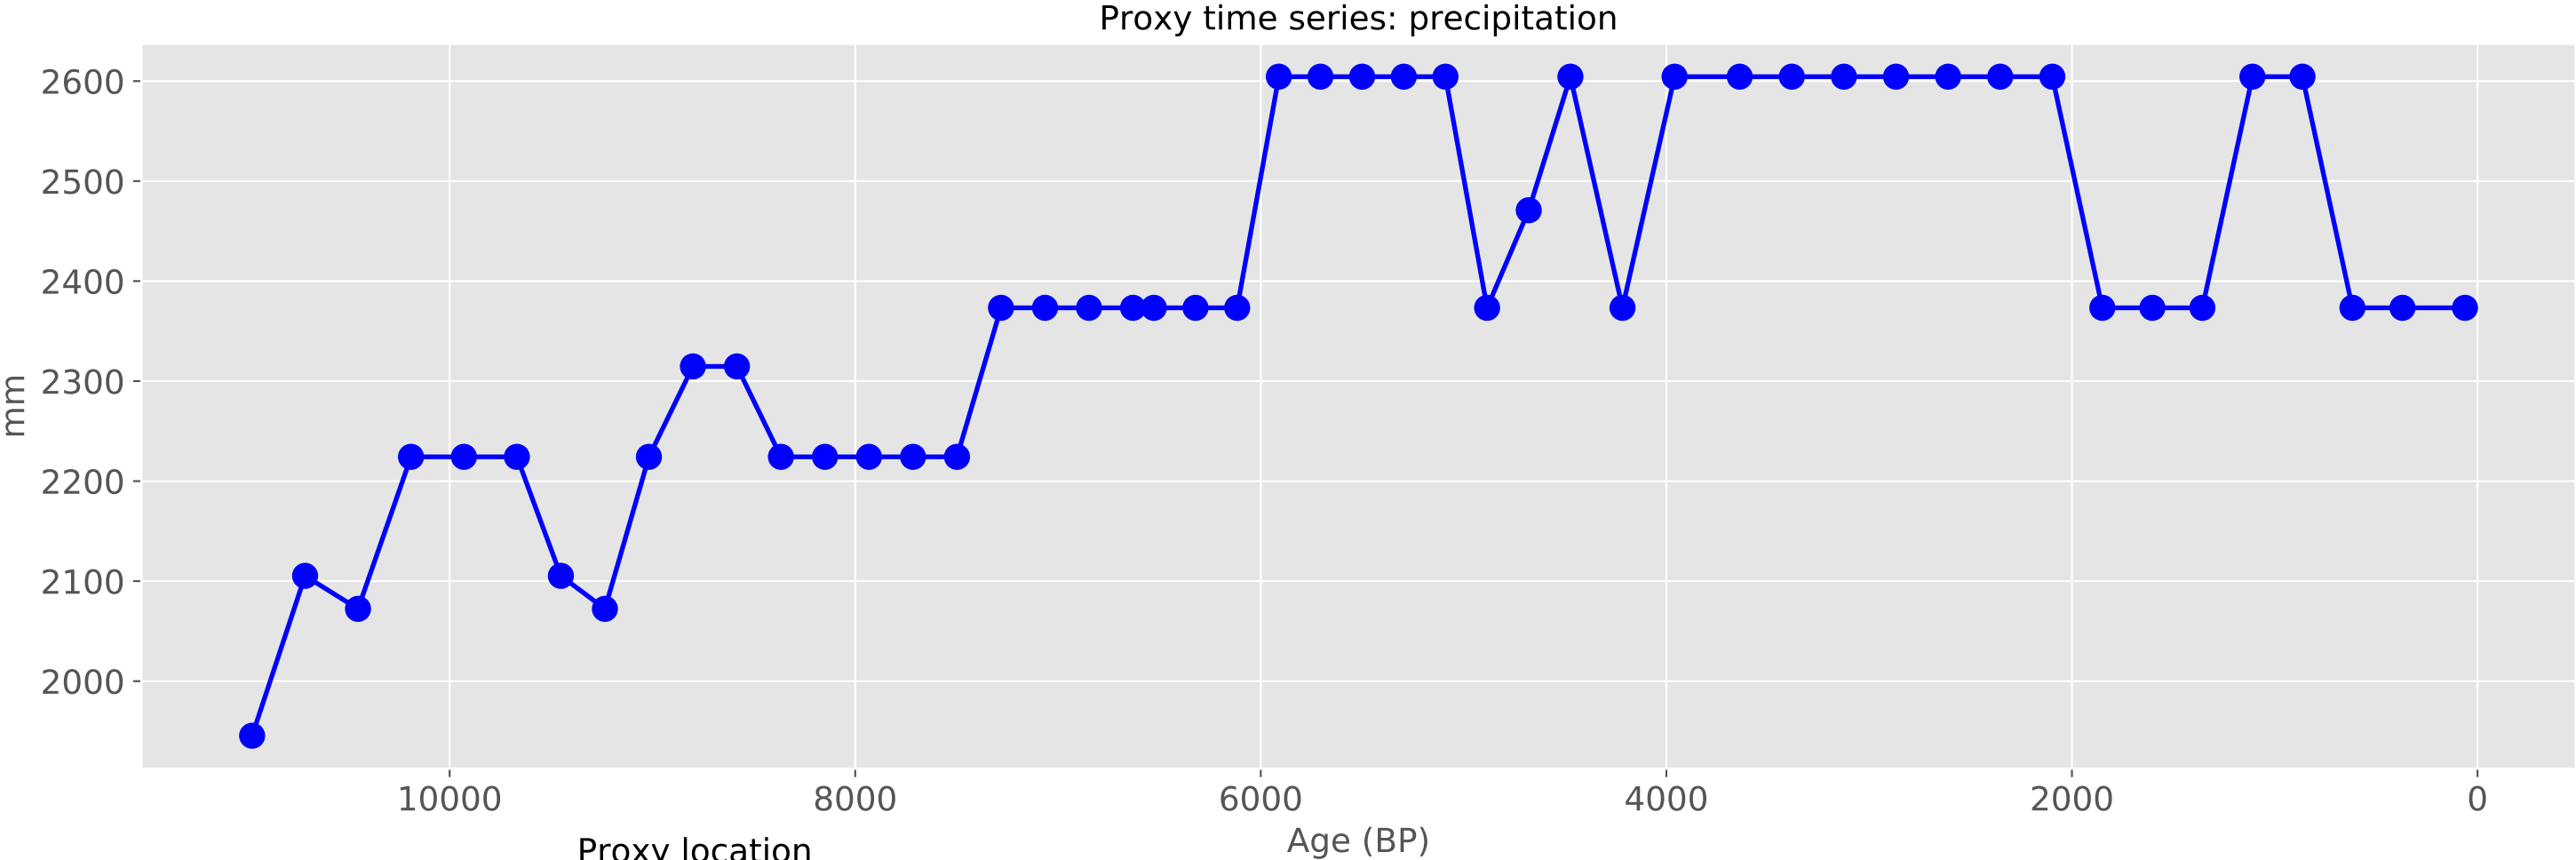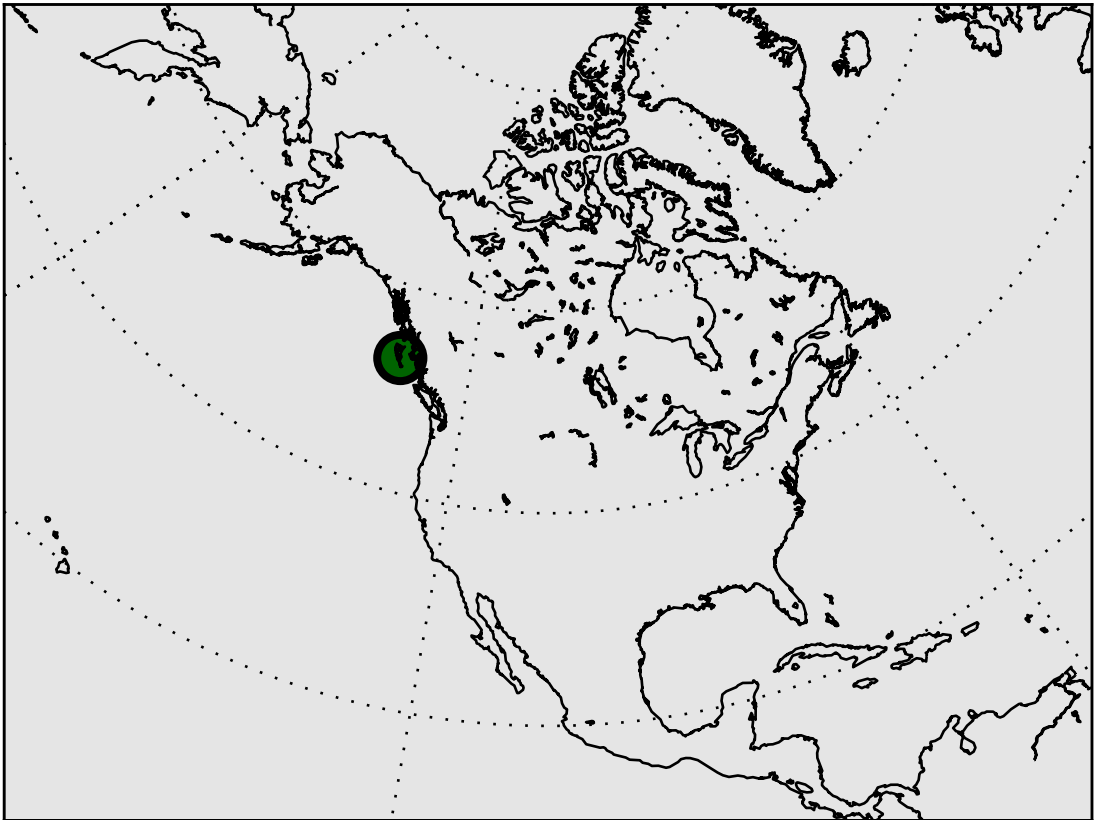

|                    |                                                                                              |
|--------------------|----------------------------------------------------------------------------------------------|
| Dataset name:      | LouisePond.Mathewes.1994                                                                     |
| Archive type:      | LakeSediment                                                                                 |
| Proxy type:        | pollen                                                                                       |
| Variable name:     | precipitation                                                                                |
| Latitude ( ° N):   | 52.95                                                                                        |
| Longitude ( ° E):  | -131.76                                                                                      |
| Elevation (m):     | 650.0                                                                                        |
| Interp. variable:  | P                                                                                            |
| Interp. detail:    | amount@surface                                                                               |
| Interp. season:    | annual                                                                                       |
| Interp. direction: | positive                                                                                     |
| Pub. 1 title:      | Paleoecology of postglacial tree line fluctuations...                                        |
| Pub. 1 authors:    | Pellatt, Marlow G.; Mathewes, Rolf W.                                                        |
| Pub. 1 year:       | 1994                                                                                         |
| Pub. 1 DOI:        | 10.1080/11956860.1994.11682230                                                               |
| Original data URL: | <a href="http://www.ncdc.noaa.gov/paleo/study/27330">www.ncdc.noaa.gov/paleo/study/27330</a> |



Proxy data and metadata

LakeSediment | pollen | LouisePond.Mathewes.1994 | M2Lb8uhg25jP

Proxy time series: temperature

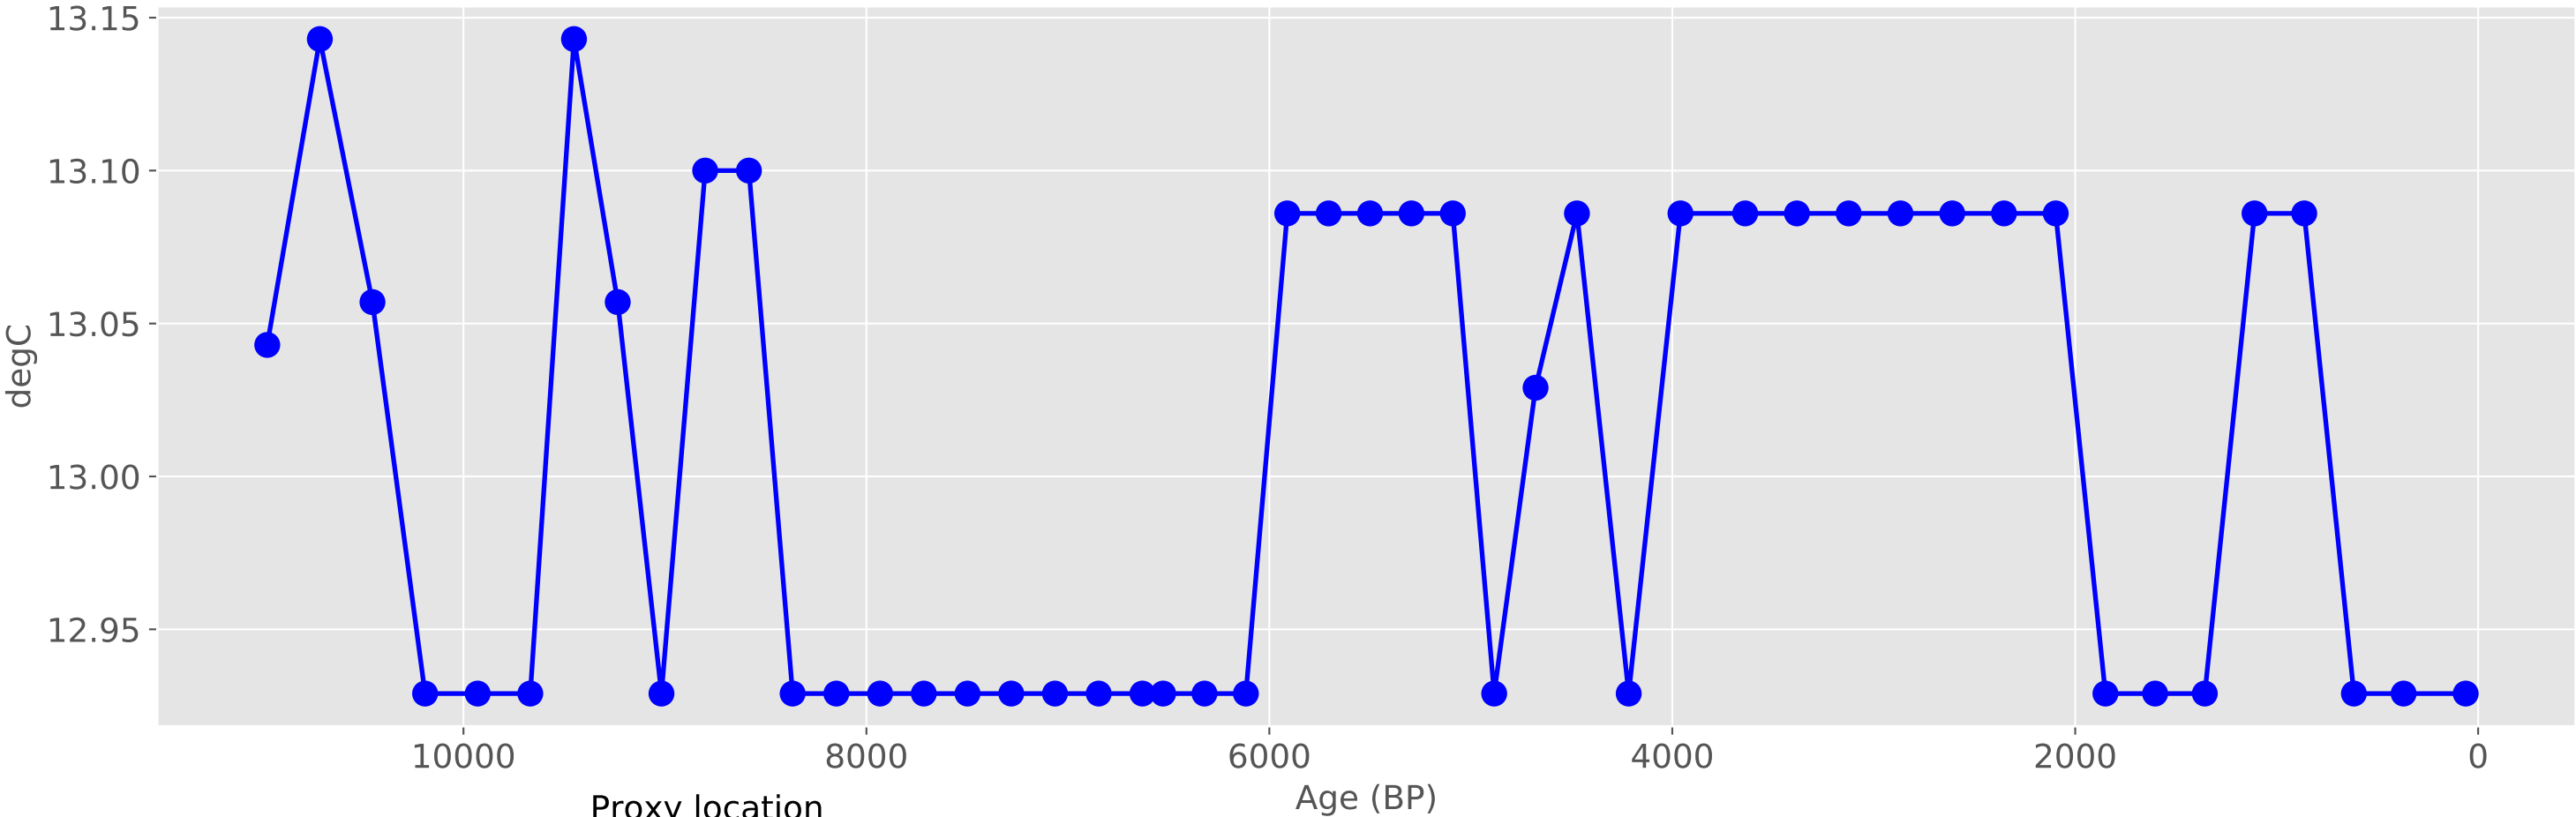

Proxy location  
(52.95 ° N, 131.76 ° W)

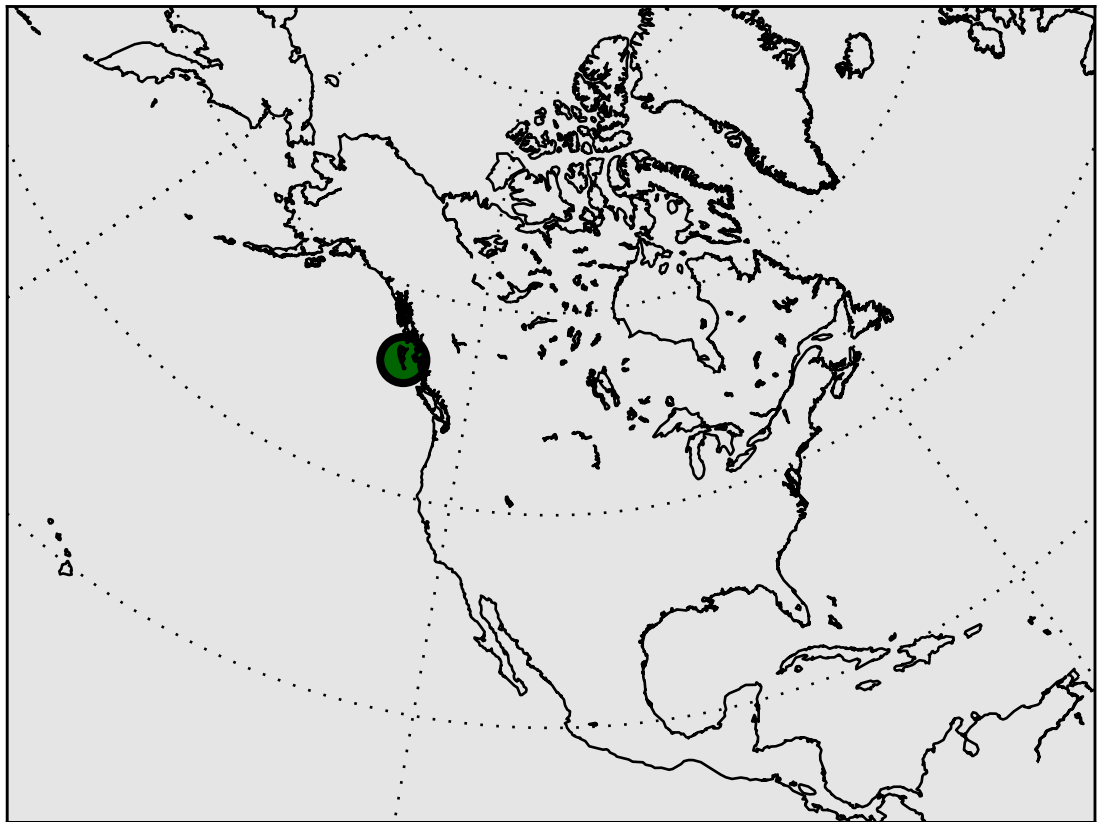

|                    |                                                                                              |
|--------------------|----------------------------------------------------------------------------------------------|
| Dataset name:      | LouisePond.Mathewes.1994                                                                     |
| Archive type:      | LakeSediment                                                                                 |
| Proxy type:        | pollen                                                                                       |
| Variable name:     | temperature                                                                                  |
| Latitude ( ° N):   | 52.95                                                                                        |
| Longitude ( ° E):  | -131.76                                                                                      |
| Elevation (m):     | 650.0                                                                                        |
| Interp. variable:  | T                                                                                            |
| Interp. detail:    | air@surface                                                                                  |
| Interp. season:    | summer+                                                                                      |
| Interp. direction: | positive                                                                                     |
| Pub. 1 title:      | Paleoecology of postglacial tree line fluctuations...                                        |
| Pub. 1 authors:    | Pellatt, Marlow G.; Mathewes, Rolf W.                                                        |
| Pub. 1 year:       | 1994                                                                                         |
| Pub. 1 DOI:        | 10.1080/11956860.1994.11682230                                                               |
| Original data URL: | <a href="http://www.ncdc.noaa.gov/paleo/study/27330">www.ncdc.noaa.gov/paleo/study/27330</a> |

Proxy data and metadata

LakeSediment | pollen | LouisePond.Mathewes.1994 | M2LI12txmw7P

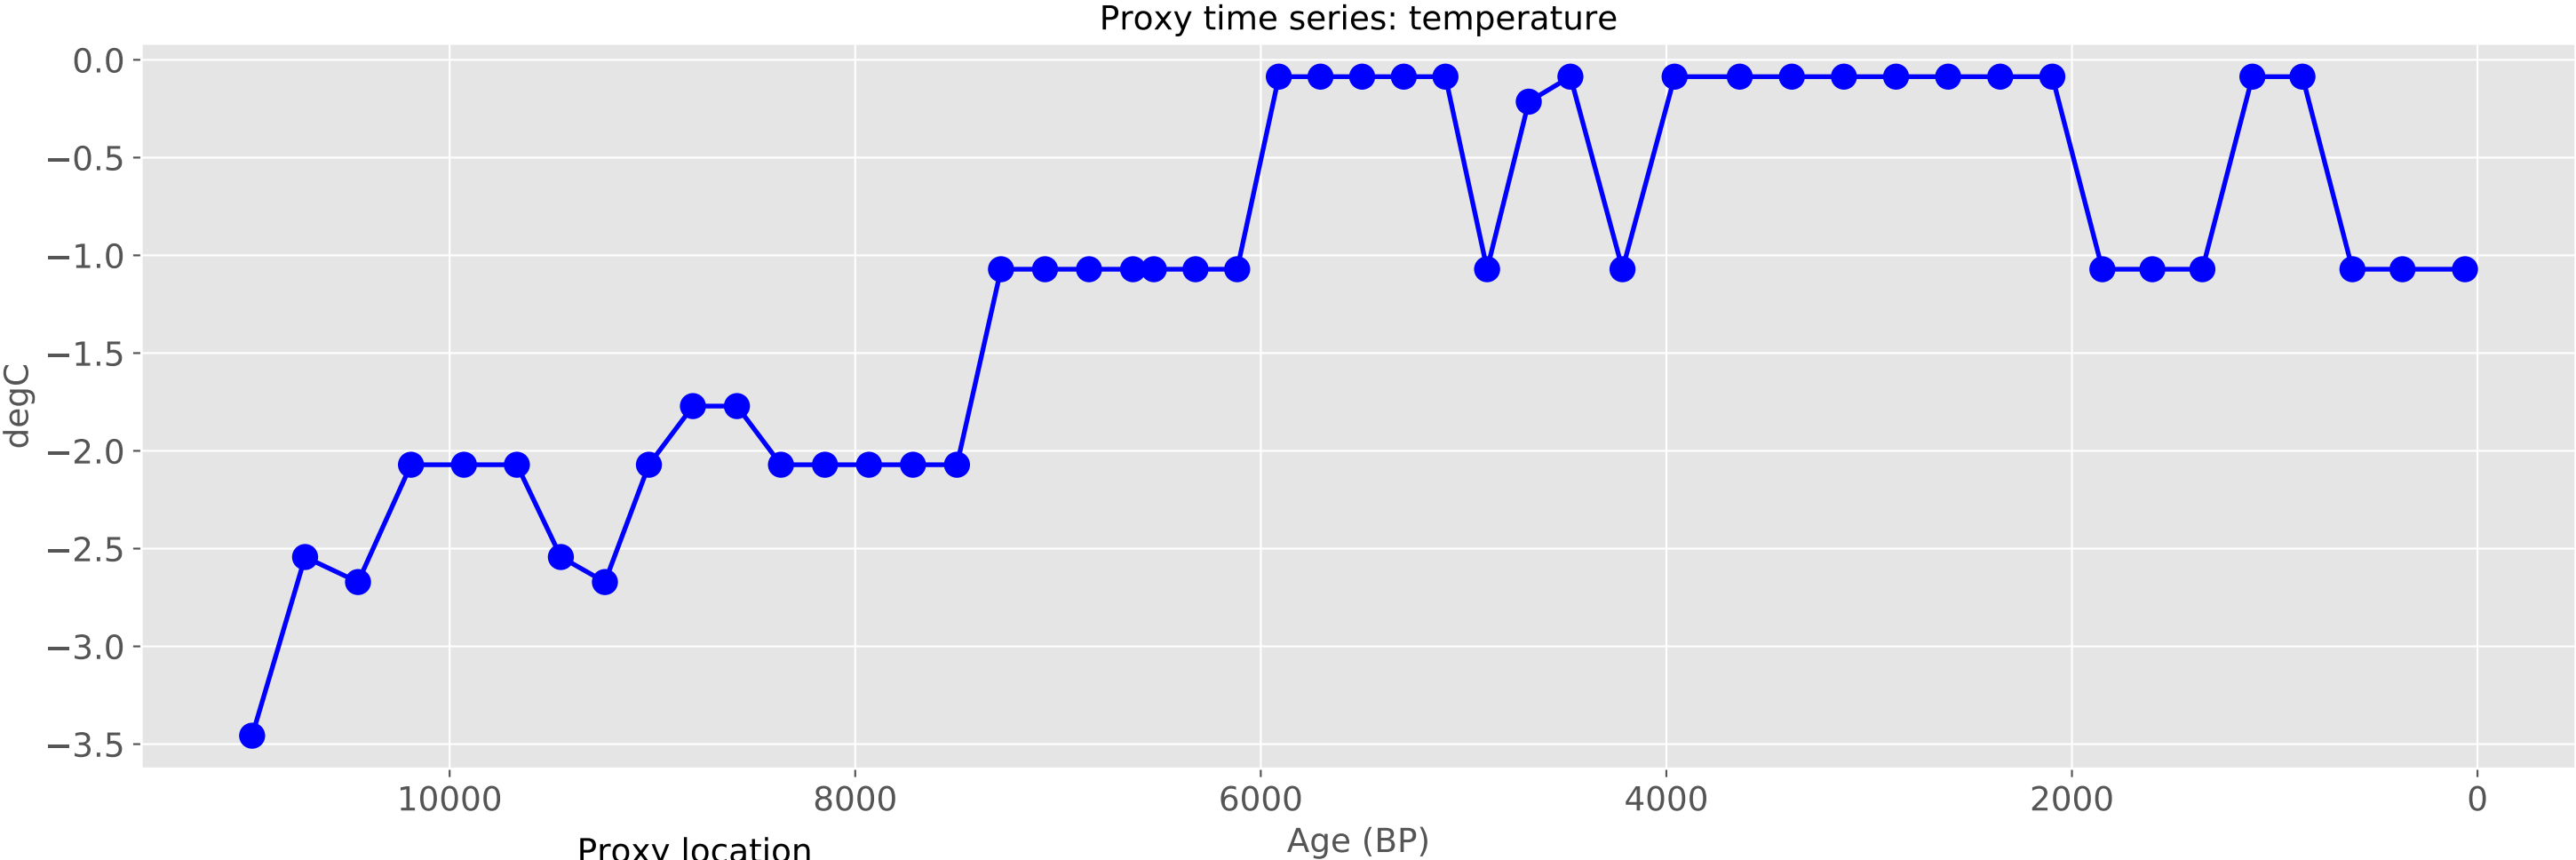

|                    |                                                                                              |
|--------------------|----------------------------------------------------------------------------------------------|
| Dataset name:      | LouisePond.Mathewes.1994                                                                     |
| Archive type:      | LakeSediment                                                                                 |
| Proxy type:        | pollen                                                                                       |
| Variable name:     | temperature                                                                                  |
| Latitude ( ° N):   | 52.95                                                                                        |
| Longitude ( ° E):  | -131.76                                                                                      |
| Elevation (m):     | 650.0                                                                                        |
| Interp. variable:  | T                                                                                            |
| Interp. detail:    | air@surface                                                                                  |
| Interp. season:    | winter+                                                                                      |
| Interp. direction: | positive                                                                                     |
| Pub. 1 title:      | Paleoecology of postglacial tree line fluctuations...                                        |
| Pub. 1 authors:    | Pellatt, Marlow G.; Mathewes, Rolf W.                                                        |
| Pub. 1 year:       | 1994                                                                                         |
| Pub. 1 DOI:        | 10.1080/11956860.1994.11682230                                                               |
| Original data URL: | <a href="http://www.ncdc.noaa.gov/paleo/study/27330">www.ncdc.noaa.gov/paleo/study/27330</a> |

Proxy data and metadata

LakeSediment | pollen | LouisePond.Mathewes.1994 | M2Lx8d4iupqP

Proxy time series: temperature

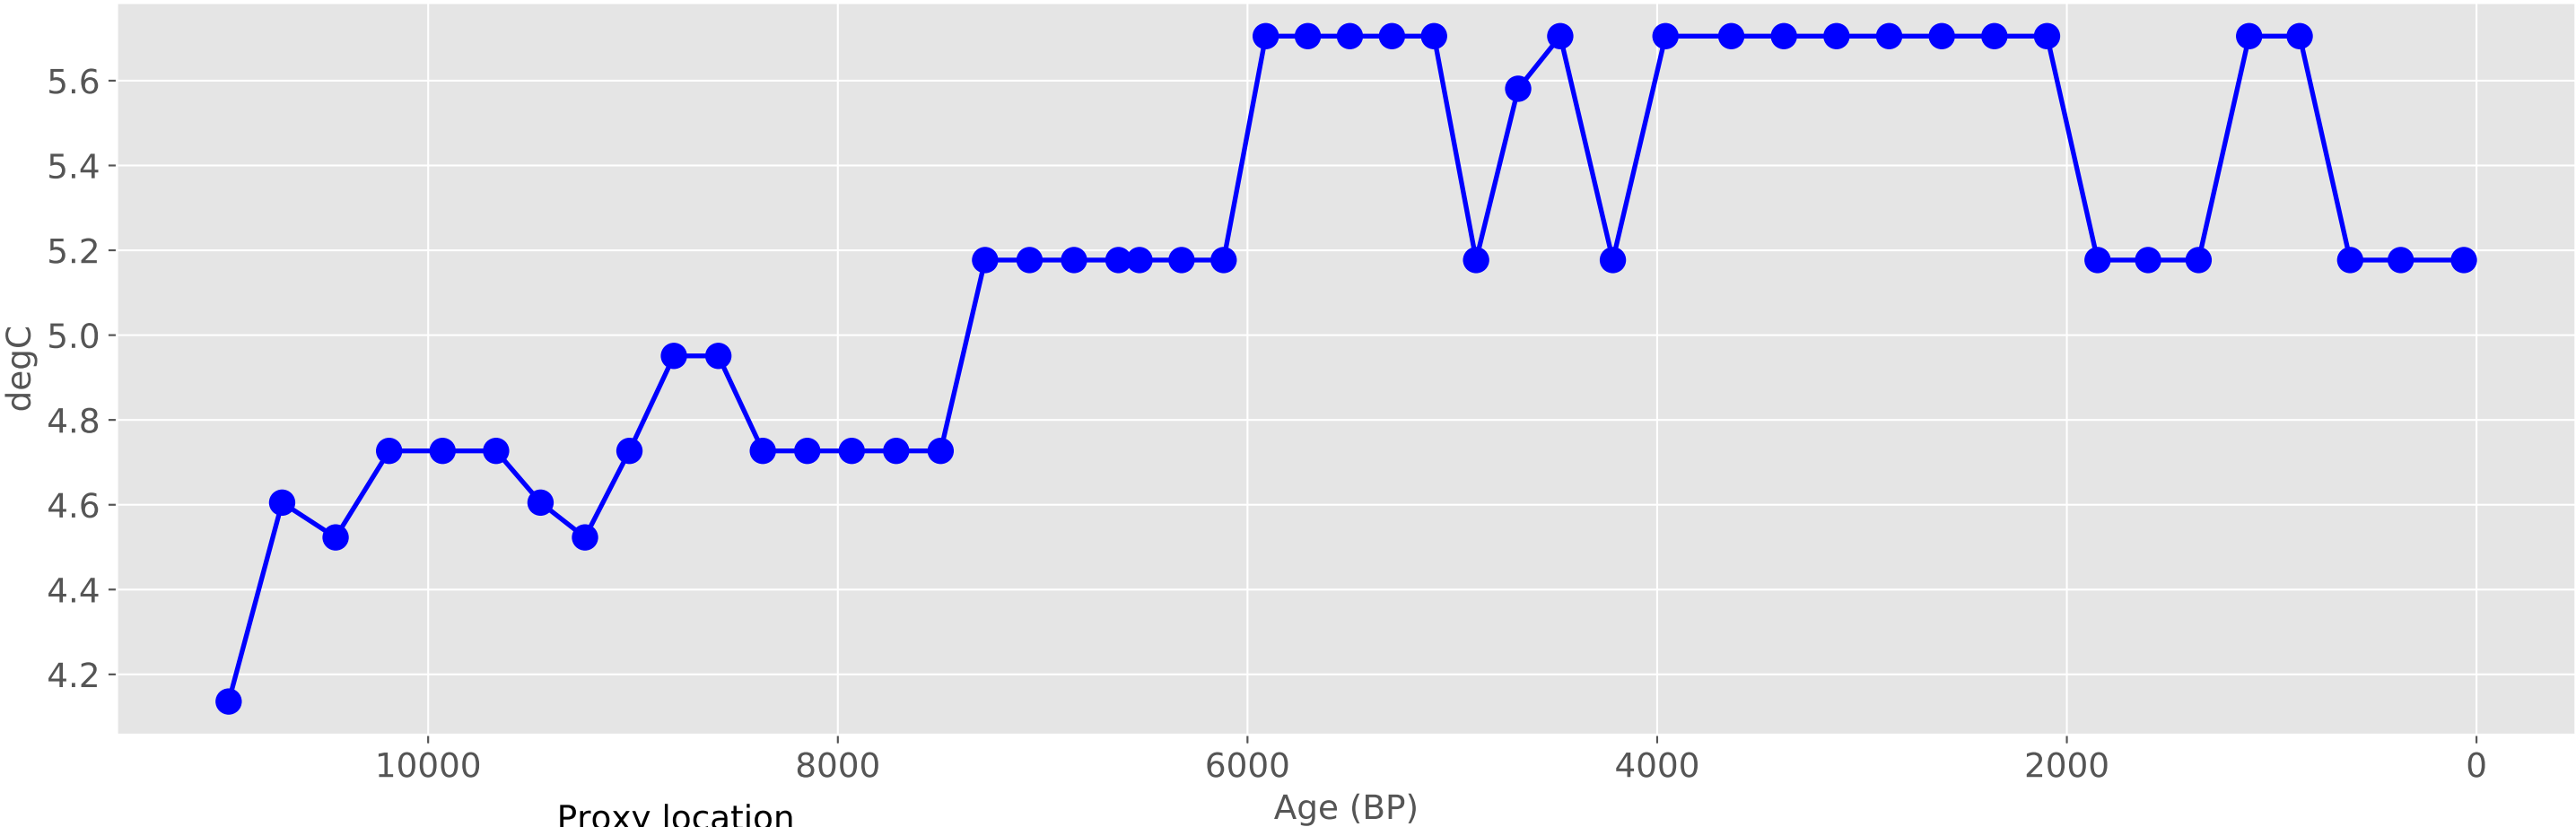

|                    |                                                       |
|--------------------|-------------------------------------------------------|
| Dataset name:      | LouisePond.Mathewes.1994                              |
| Archive type:      | LakeSediment                                          |
| Proxy type:        | pollen                                                |
| Variable name:     | temperature                                           |
| Latitude ( ° N):   | 52.95                                                 |
| Longitude ( ° E):  | -131.76                                               |
| Elevation (m):     | 650.0                                                 |
| Interp. variable:  | T                                                     |
| Interp. detail:    | air@surface                                           |
| Interp. season:    | annual                                                |
| Interp. direction: | positive                                              |
| Pub. 1 title:      | Paleoecology of postglacial tree line fluctuations... |
| Pub. 1 authors:    | Pellatt, Marlow G.; Mathewes, Rolf W.                 |
| Pub. 1 year:       | 1994                                                  |
| Pub. 1 DOI:        | 10.1080/11956860.1994.11682230                        |
| Original data URL: | www.ncdc.noaa.gov/paleo/study/27330                   |

Proxy data and metadata  
**LakeSediment | pollen | Marion.Mathewes.1973 | M2L5f5ry0h2P**

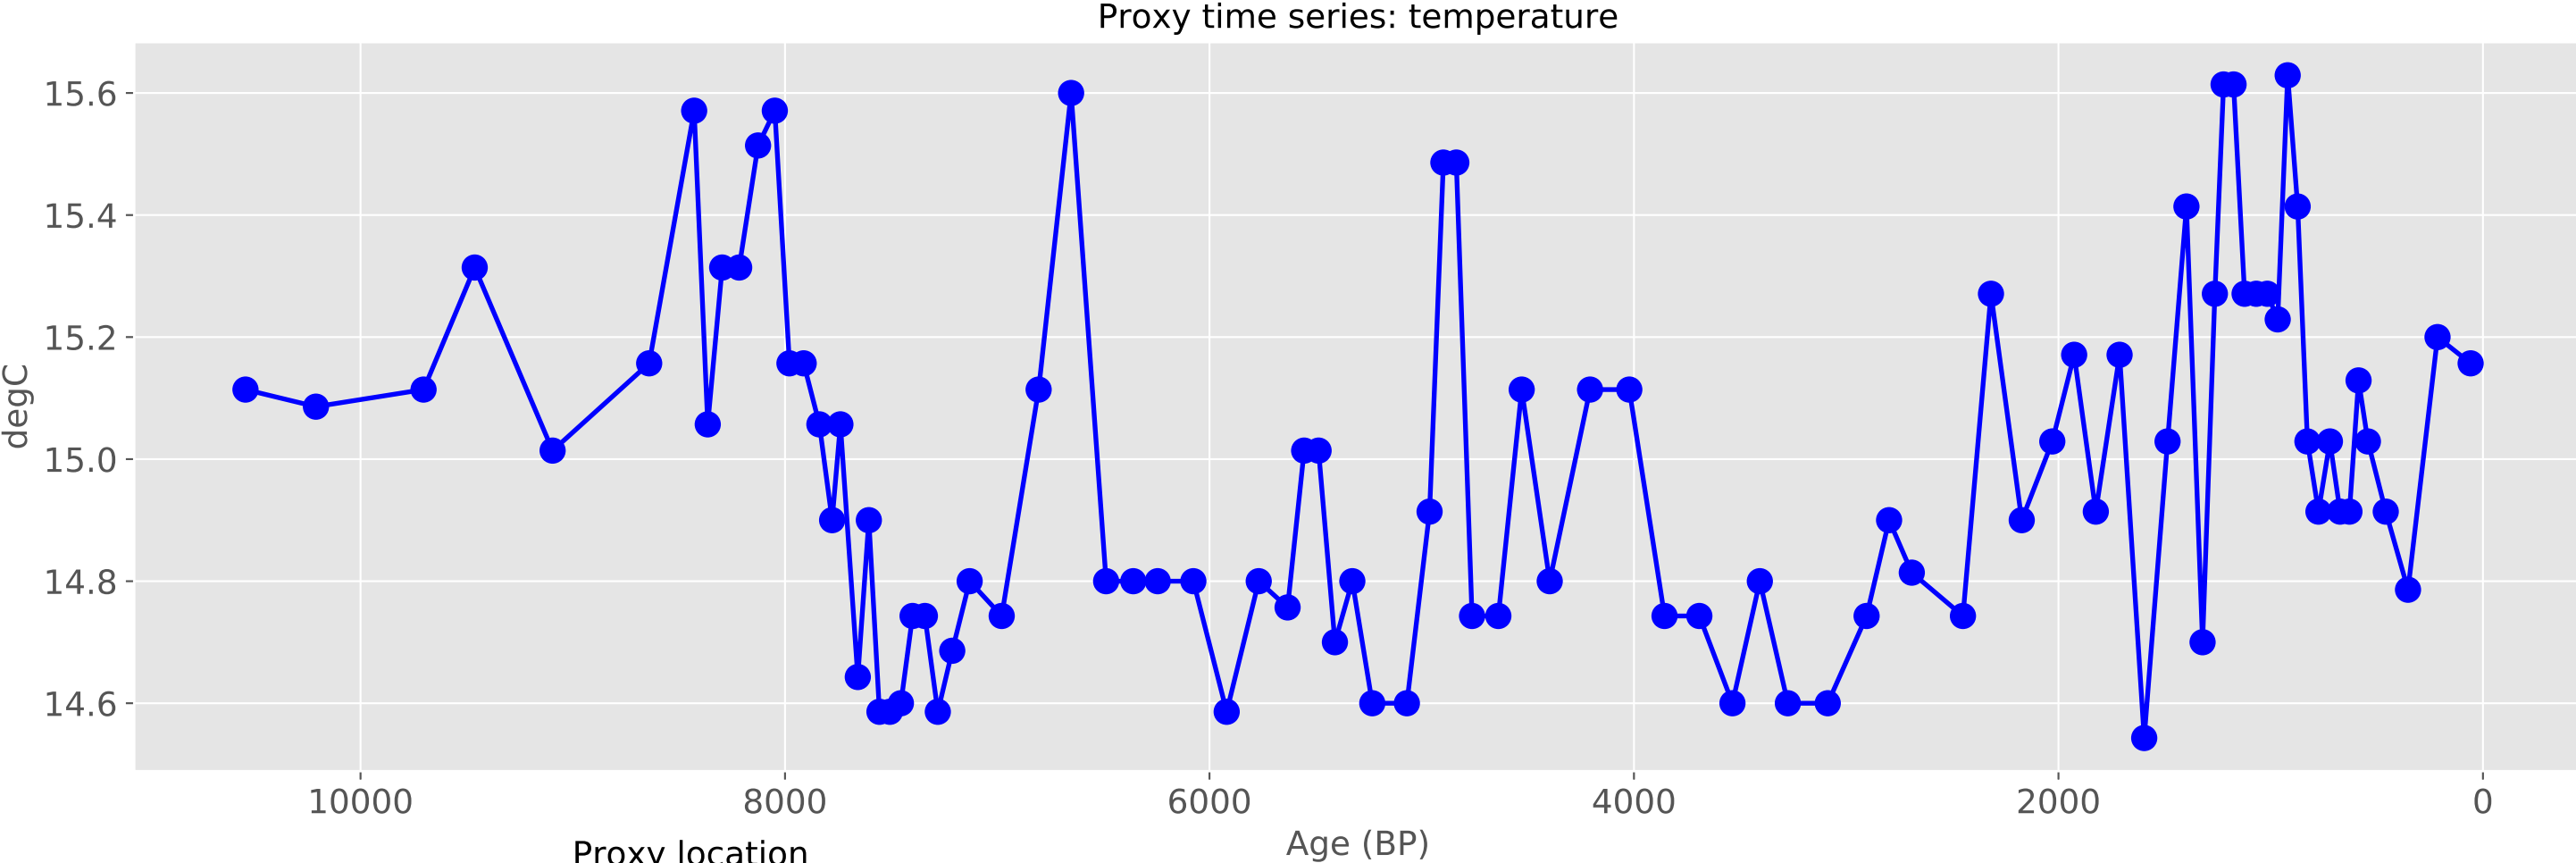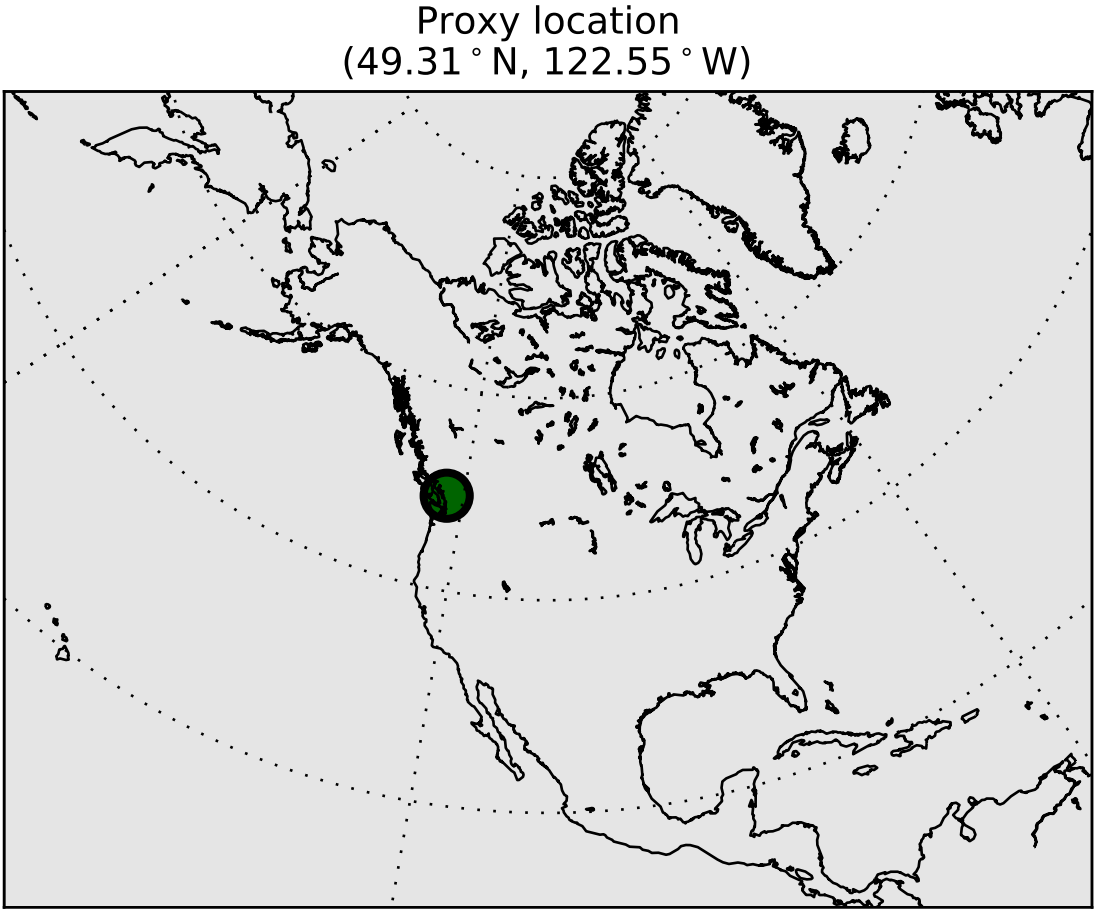

|                    |                                                       |
|--------------------|-------------------------------------------------------|
| Dataset name:      | Marion.Mathewes.1973                                  |
| Archive type:      | LakeSediment                                          |
| Proxy type:        | pollen                                                |
| Variable name:     | temperature                                           |
| Latitude ( ° N):   | 49.3106                                               |
| Longitude ( ° E):  | -122.5483                                             |
| Elevation (m):     | 305.0                                                 |
| Interp. variable:  | T                                                     |
| Interp. detail:    | air@surface                                           |
| Interp. season:    | summer+                                               |
| Interp. direction: | positive                                              |
| Pub. 1 title:      | A palynological study of postglacial vegetation ch... |
| Pub. 1 authors:    | Mathewes, Rolf W.                                     |
| Pub. 1 year:       | 1973                                                  |
| Pub. 1 DOI:        | 10.1139/b73-271                                       |
| Original data URL: | wNAm                                                  |

Proxy data and metadata  
**LakeSediment | pollen | Marion.Mathewes.1973 | M2Lbh1cglq5P**

Proxy time series: temperature

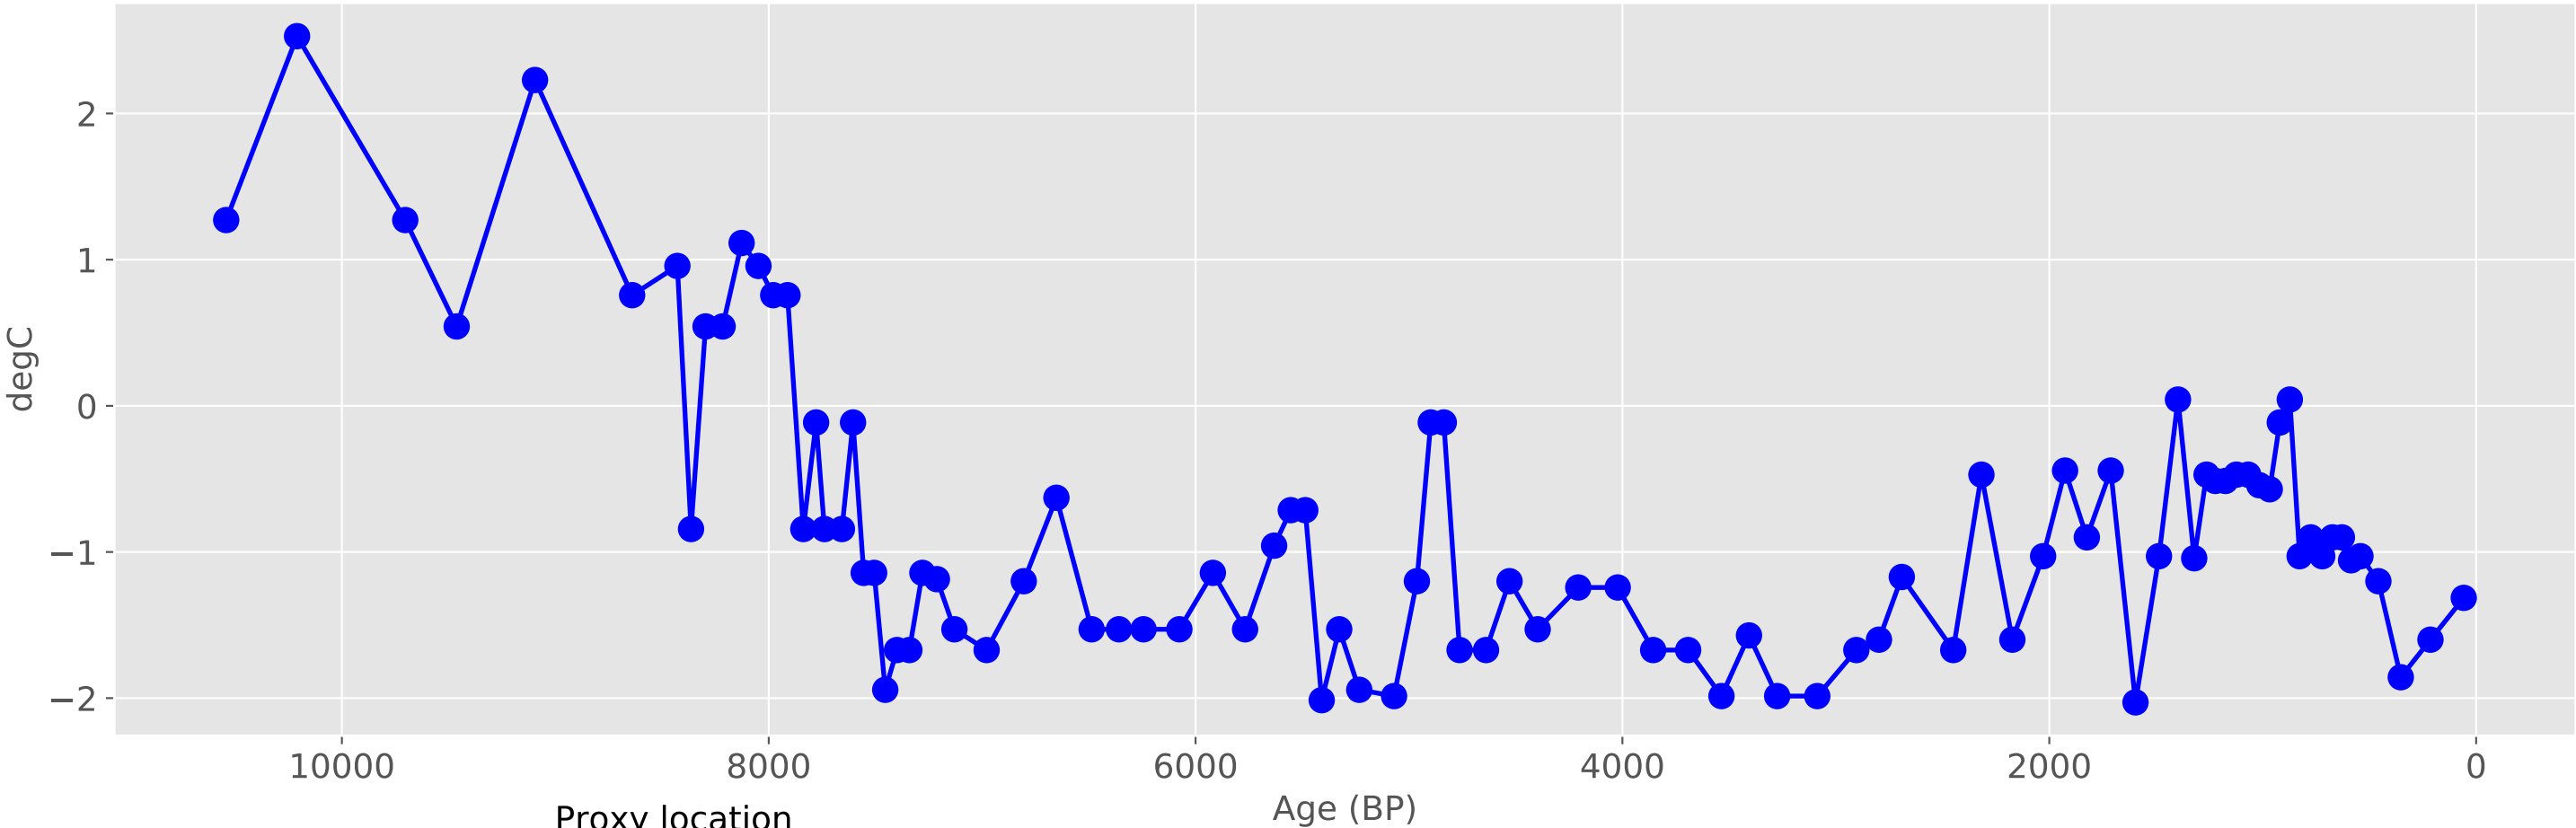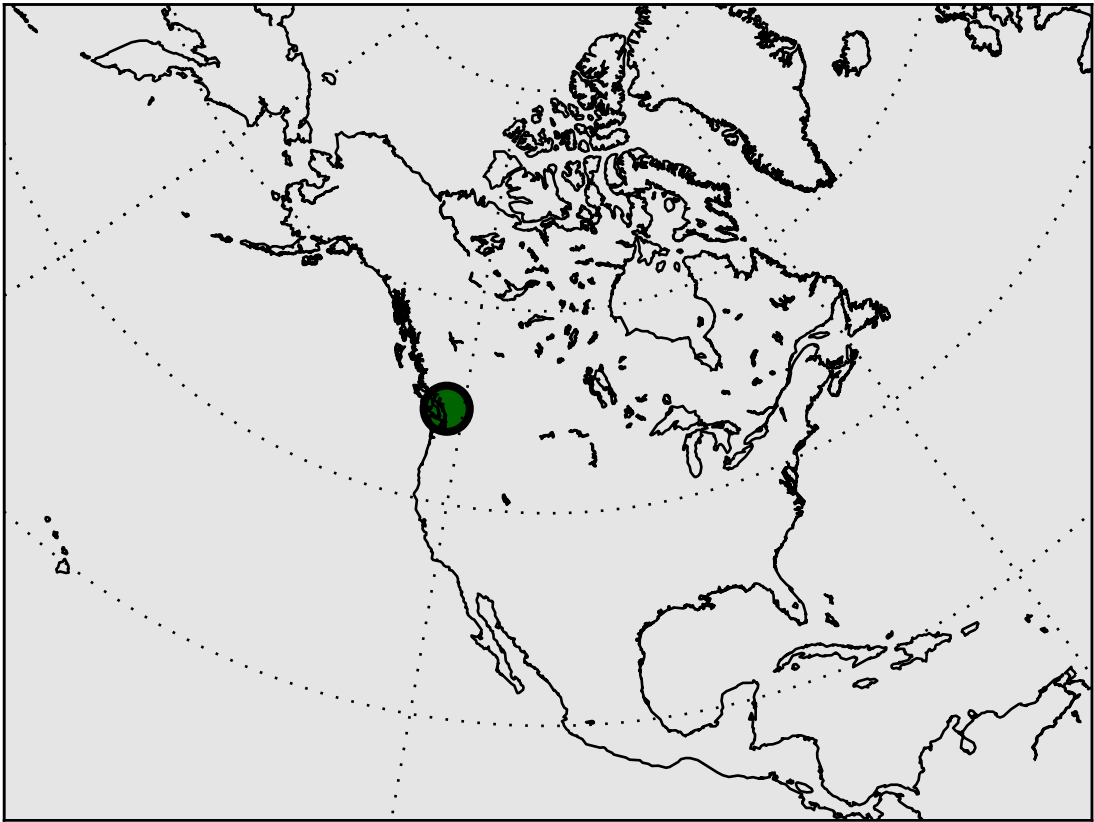

|                    |                                                       |
|--------------------|-------------------------------------------------------|
| Dataset name:      | Marion.Mathewes.1973                                  |
| Archive type:      | LakeSediment                                          |
| Proxy type:        | pollen                                                |
| Variable name:     | temperature                                           |
| Latitude ( ° N):   | 49.3106                                               |
| Longitude ( ° E):  | -122.5483                                             |
| Elevation (m):     | 305.0                                                 |
| Interp. variable:  | T                                                     |
| Interp. detail:    | air@surface                                           |
| Interp. season:    | winter+                                               |
| Interp. direction: | positive                                              |
| Pub. 1 title:      | A palynological study of postglacial vegetation ch... |
| Pub. 1 authors:    | Mathewes, Rolf W.                                     |
| Pub. 1 year:       | 1973                                                  |
| Pub. 1 DOI:        | 10.1139/b73-271                                       |
| Original data URL: | wNAm                                                  |

Proxy data and metadata  
**LakeSediment | pollen | Marion.Mathewes.1973 | M2Lrq9qdhpzP**

Proxy time series: temperature

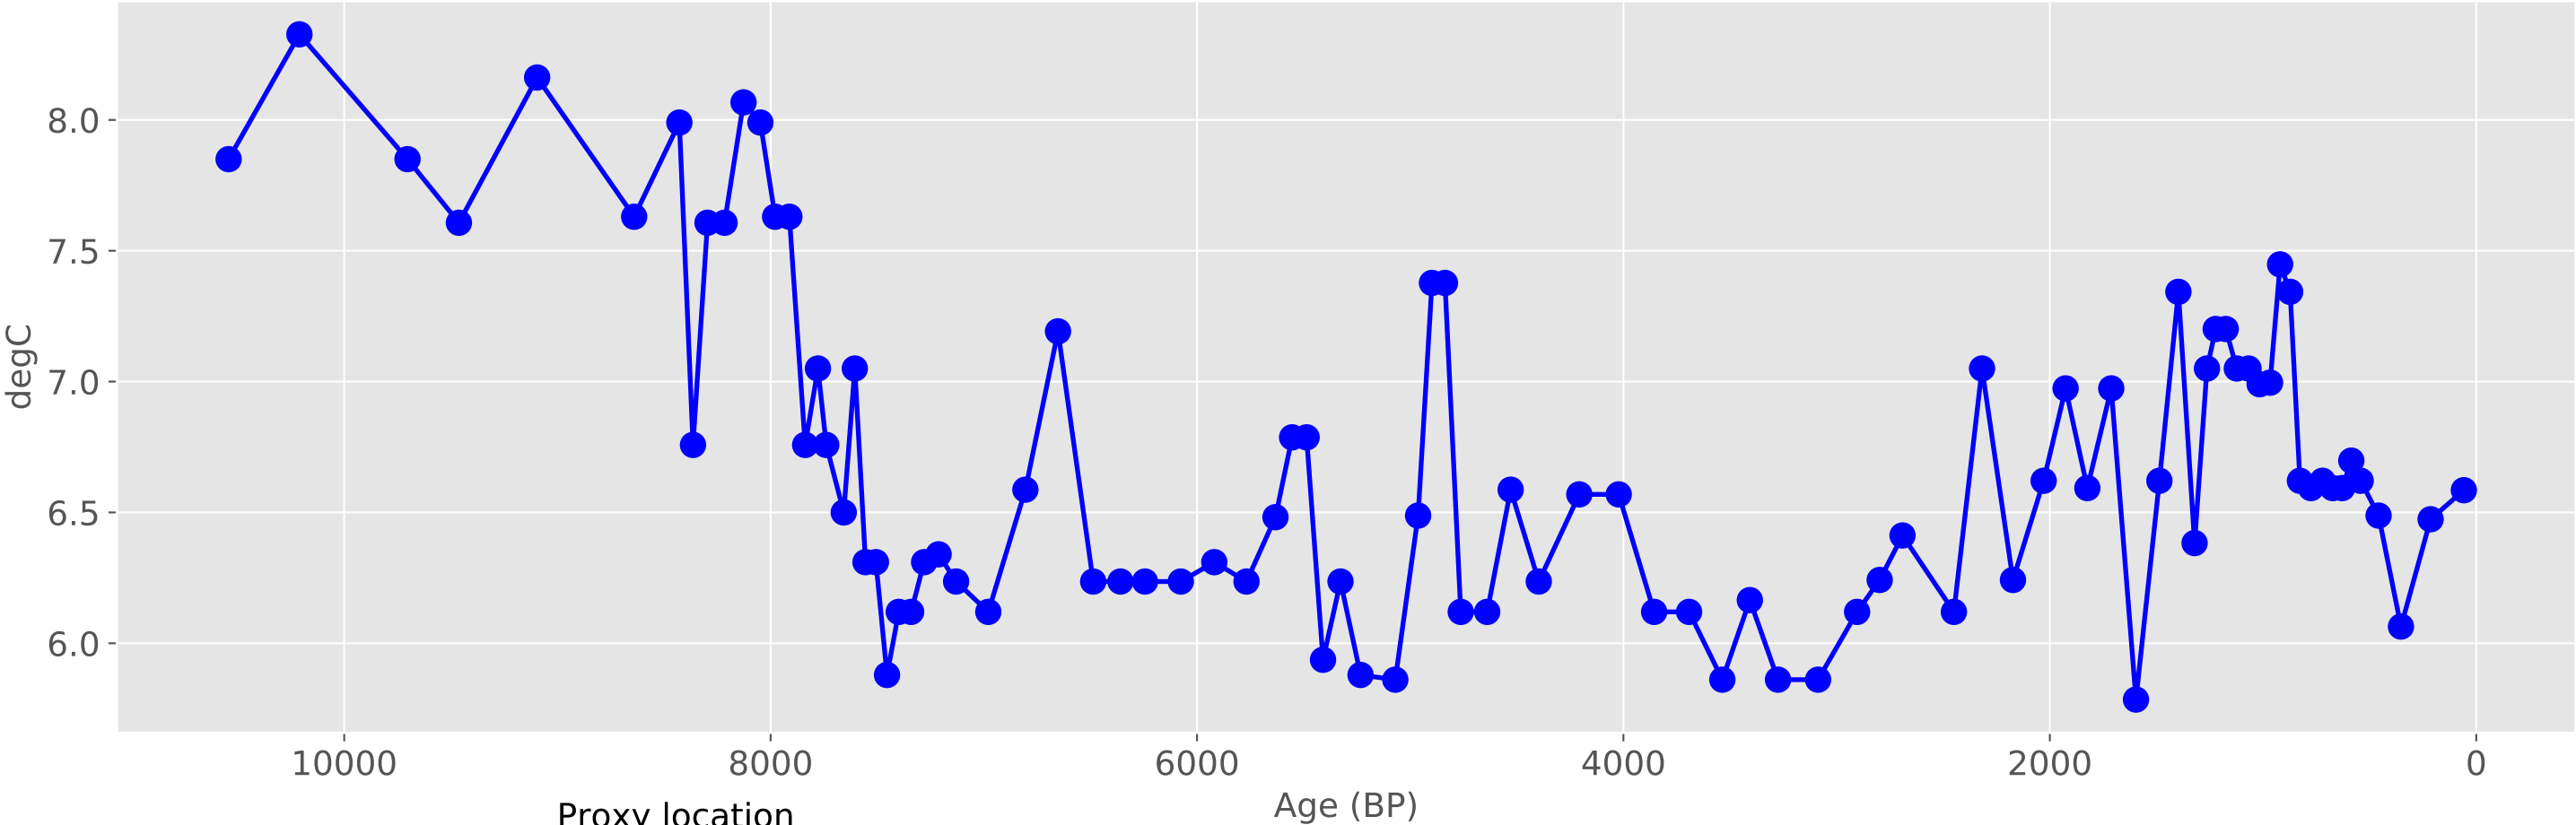

Proxy location  
(49.31 ° N, 122.55 ° W)

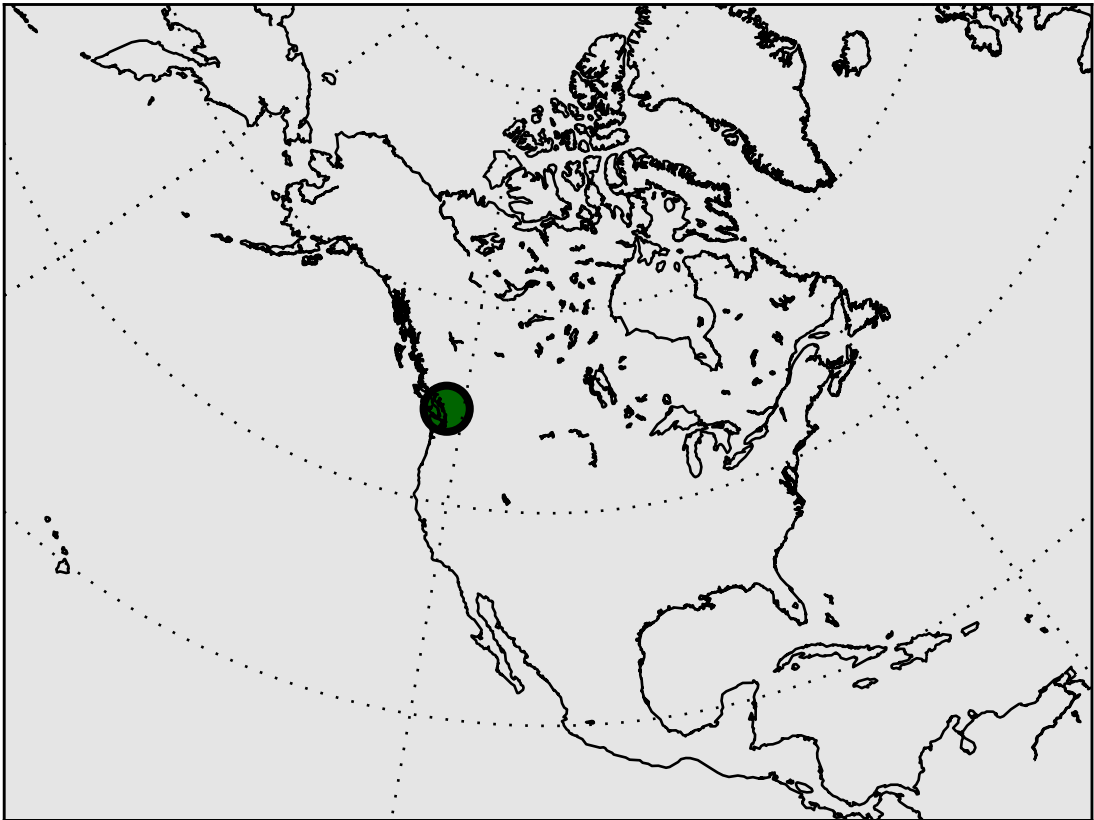

|                    |                                                       |
|--------------------|-------------------------------------------------------|
| Dataset name:      | Marion.Mathewes.1973                                  |
| Archive type:      | LakeSediment                                          |
| Proxy type:        | pollen                                                |
| Variable name:     | temperature                                           |
| Latitude ( ° N):   | 49.3106                                               |
| Longitude ( ° E):  | -122.5483                                             |
| Elevation (m):     | 305.0                                                 |
| Interp. variable:  | T                                                     |
| Interp. detail:    | air@surface                                           |
| Interp. season:    | annual                                                |
| Interp. direction: | positive                                              |
| Pub. 1 title:      | A palynological study of postglacial vegetation ch... |
| Pub. 1 authors:    | Mathewes, Rolf W.                                     |
| Pub. 1 year:       | 1973                                                  |
| Pub. 1 DOI:        | 10.1139/b73-271                                       |
| Original data URL: | wNAm                                                  |



Proxy data and metadata  
LakeSediment | pollen | Marion.Mathewes.1973 | M2Lx9moy4tqP

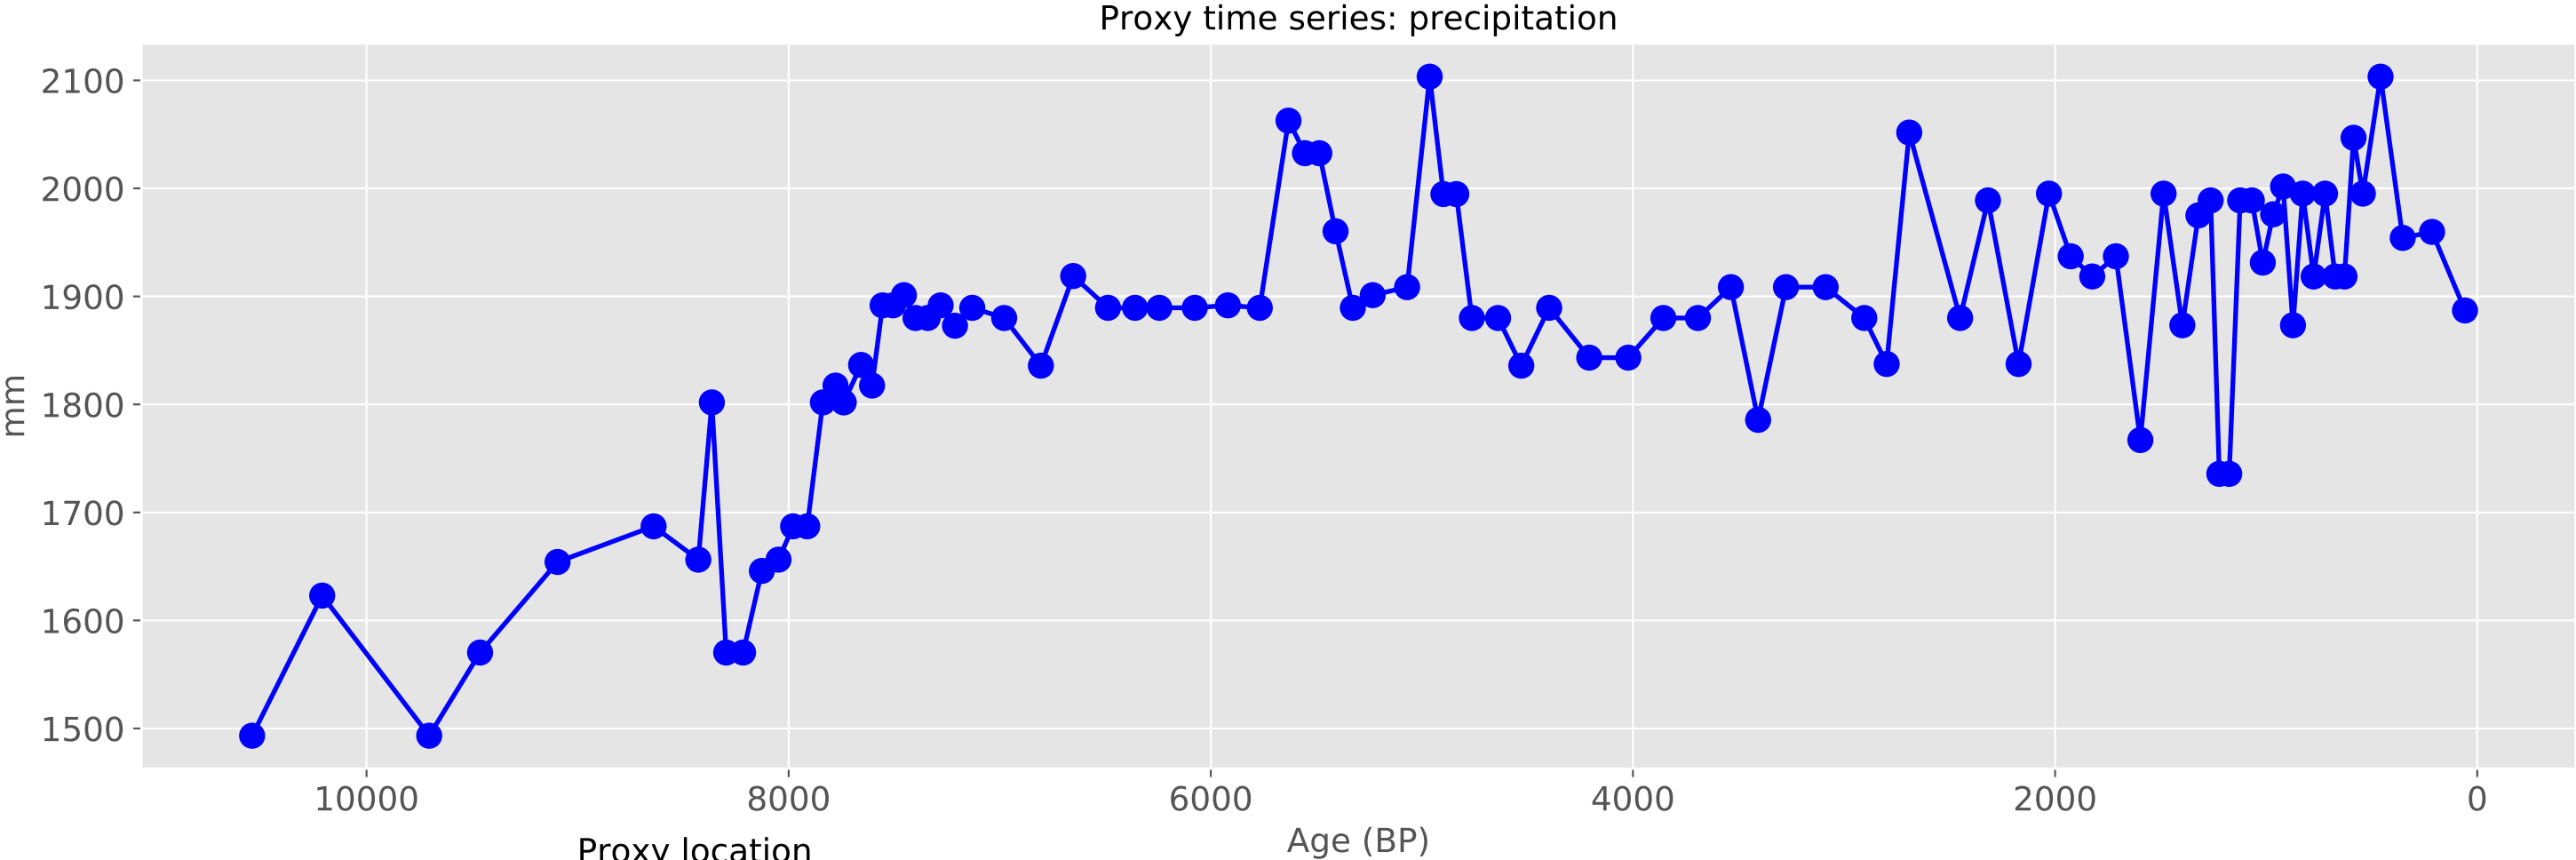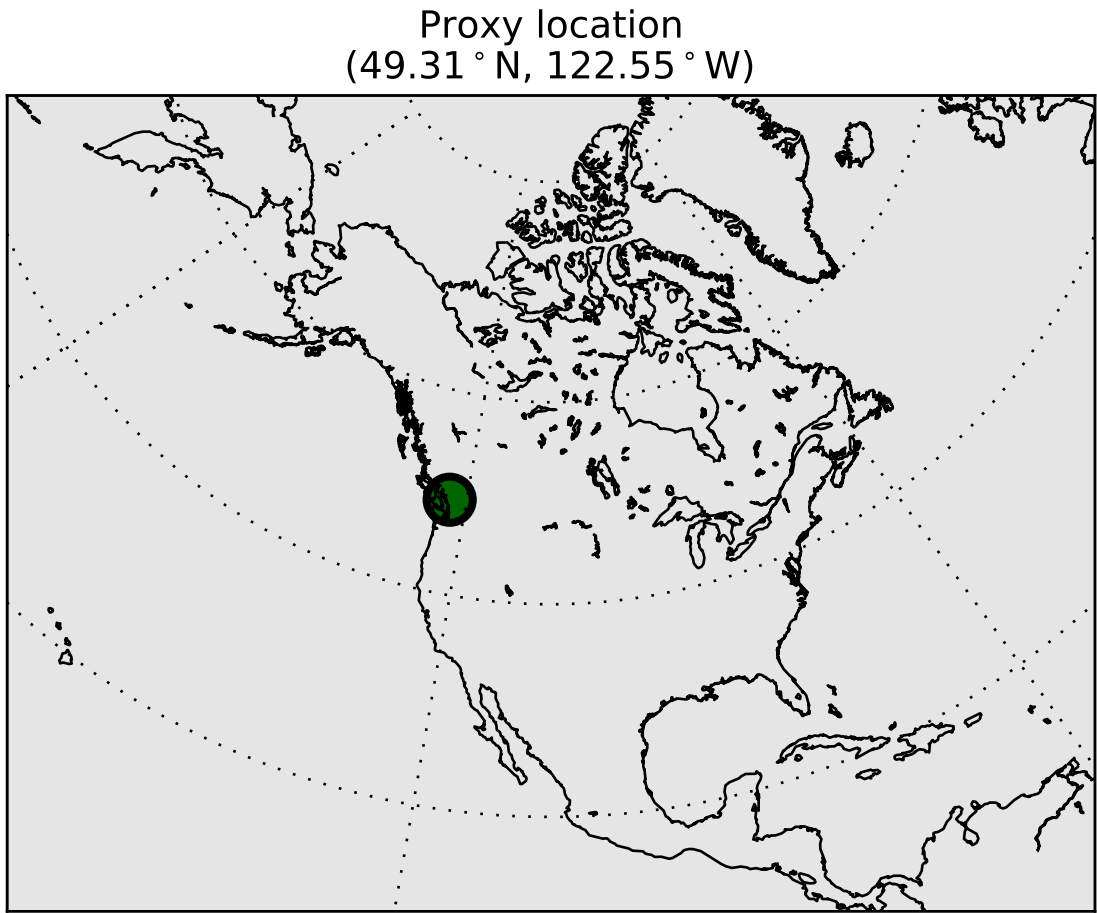

|                    |                                                       |
|--------------------|-------------------------------------------------------|
| Dataset name:      | Marion.Mathewes.1973                                  |
| Archive type:      | LakeSediment                                          |
| Proxy type:        | pollen                                                |
| Variable name:     | precipitation                                         |
| Latitude ( ° N):   | 49.3106                                               |
| Longitude ( ° E):  | -122.5483                                             |
| Elevation (m):     | 305.0                                                 |
| Interp. variable:  | P                                                     |
| Interp. detail:    | amount@surface                                        |
| Interp. season:    | annual                                                |
| Interp. direction: | positive                                              |
| Pub. 1 title:      | A palynological study of postglacial vegetation ch... |
| Pub. 1 authors:    | Mathewes, Rolf W.                                     |
| Pub. 1 year:       | 1973                                                  |
| Pub. 1 DOI:        | 10.1139/b73-271                                       |
| Original data URL: | wNAm                                                  |

Proxy data and metadata  
LakeSediment | pollen | EnosLake.Brown.2006 | WEB10ea8a20

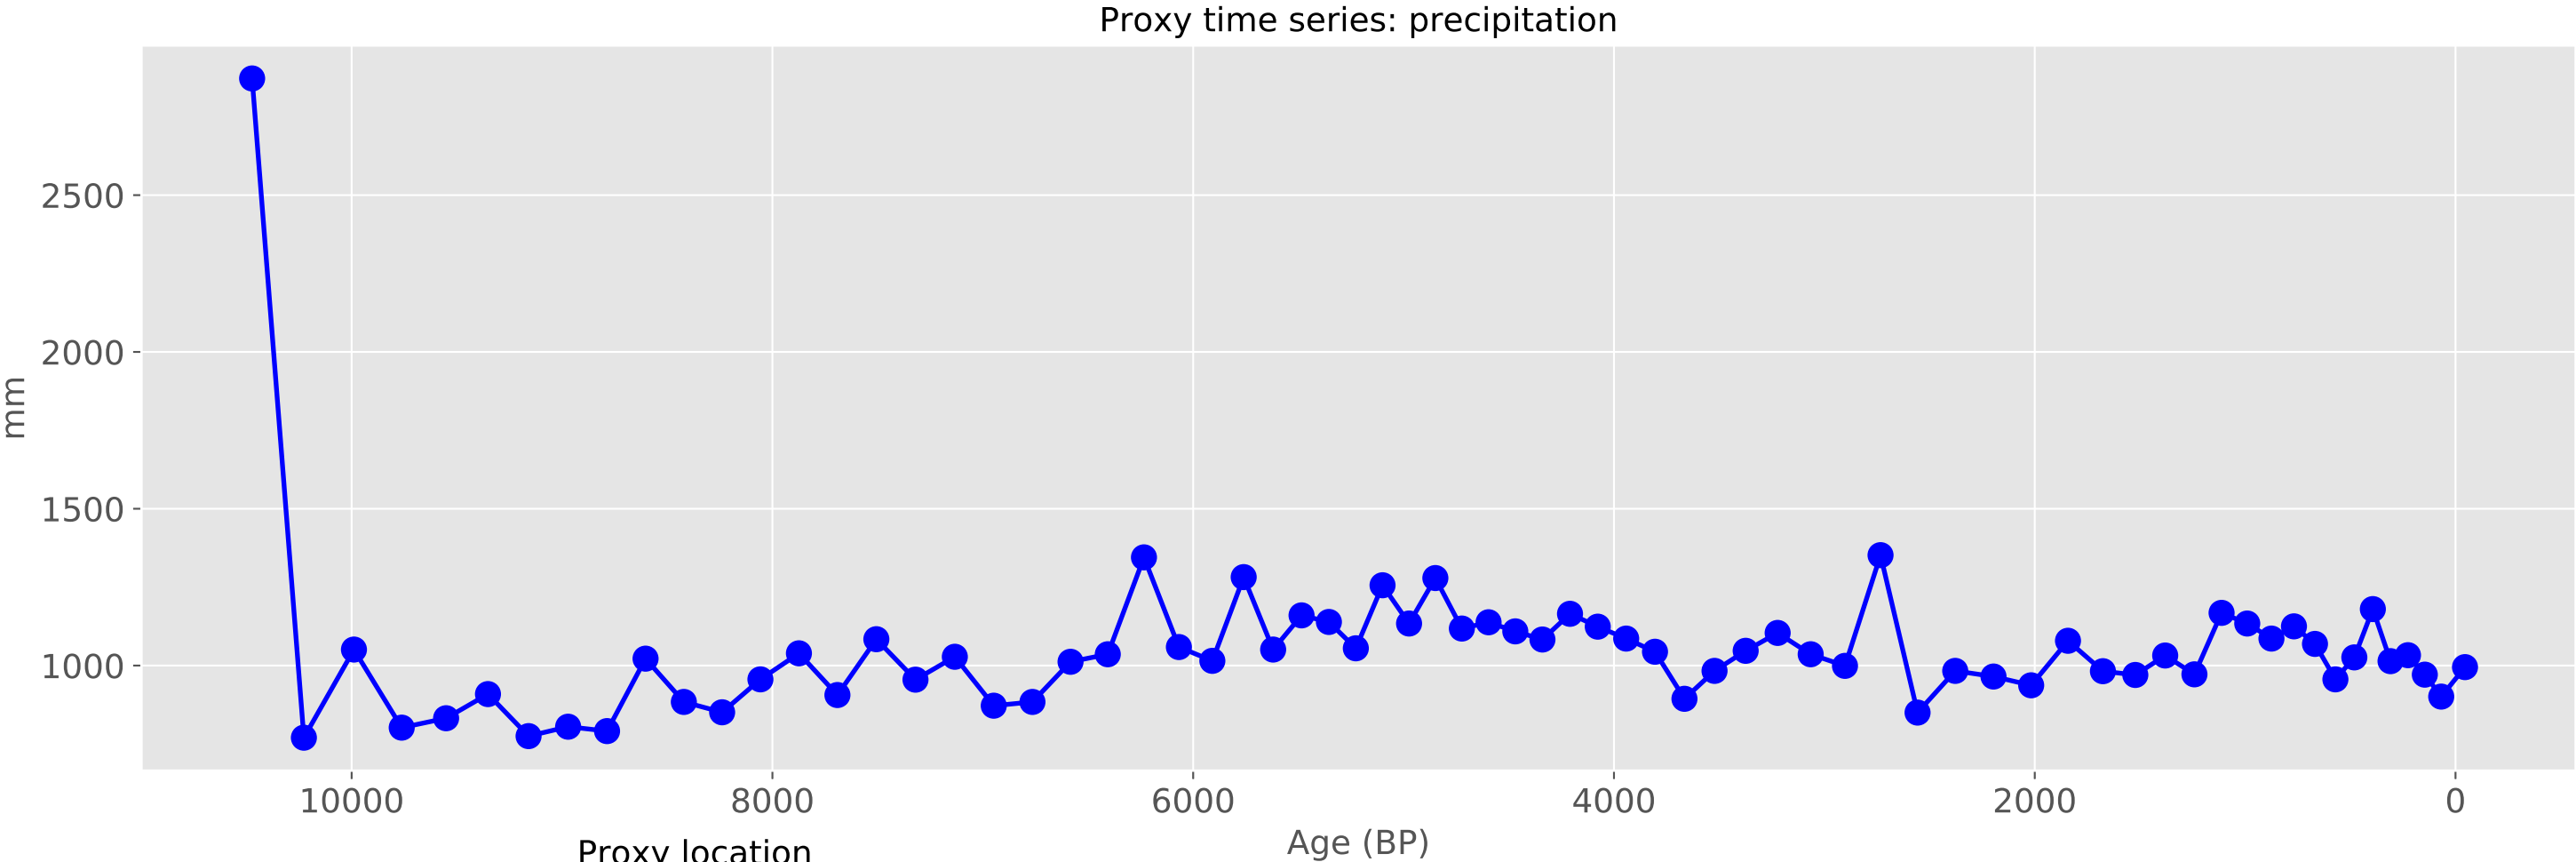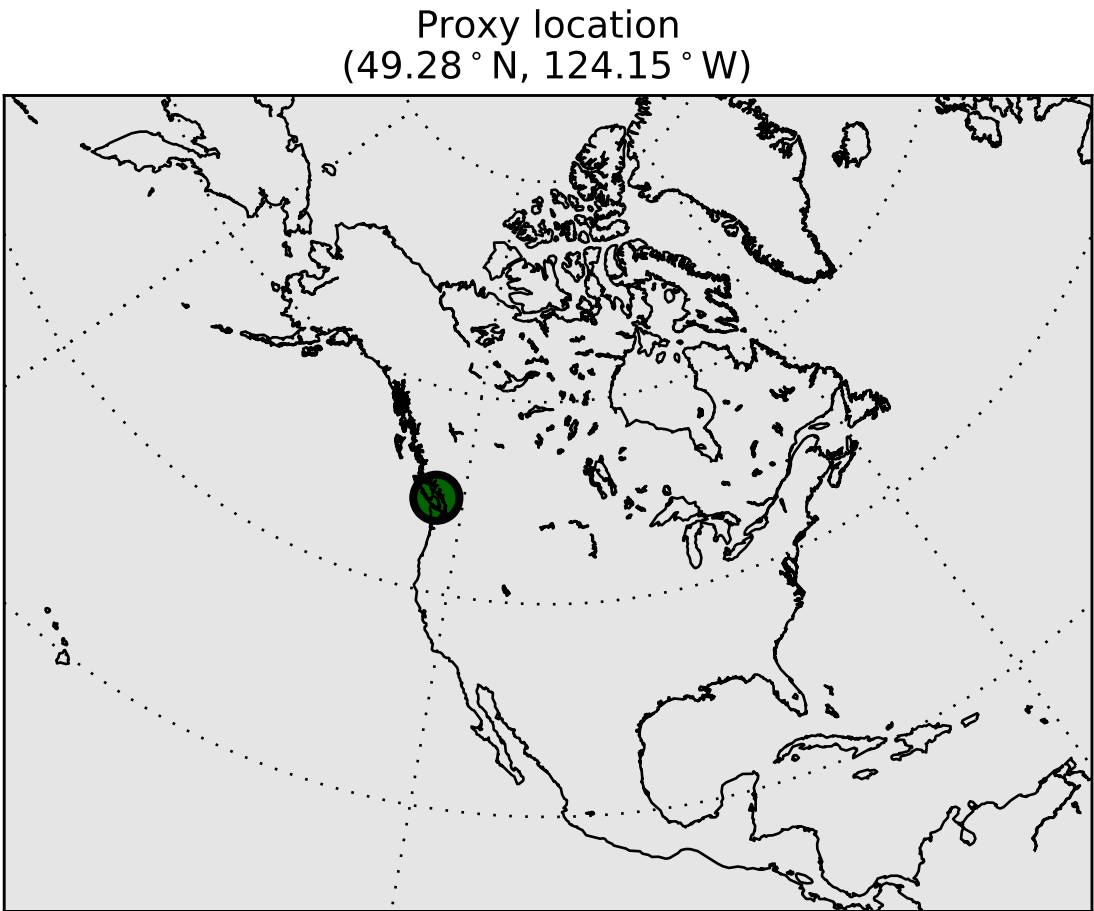

|                    |                                                       |
|--------------------|-------------------------------------------------------|
| Dataset name:      | EnosLake.Brown.2006                                   |
| Archive type:      | LakeSediment                                          |
| Proxy type:        | pollen                                                |
| Variable name:     | precipitation                                         |
| Latitude ( ° N):   | 49.28                                                 |
| Longitude ( ° E):  | -124.15                                               |
| Elevation (m):     | 46.0                                                  |
| Interp. variable:  | P                                                     |
| Interp. detail:    | amount@surface                                        |
| Interp. season:    | annual                                                |
| Interp. direction: | positive                                              |
| Pub. 1 title:      | Holocene precipitation in the coastal temperate ra... |
| Pub. 1 authors:    | Brown, K.J.;Fitton, R.J.;Schoups, G.;Allen, G.B.;W... |
| Pub. 1 year:       | 2006                                                  |
| Pub. 1 DOI:        | 10.1016/j.quascirev.2006.02.020                       |
| Original data URL: | wNAm                                                  |

Proxy data and metadata  
**LakeSediment | pollen | BoomerangLake.Brown.2006 | WEB31e807ae**

Proxy time series: precipitation

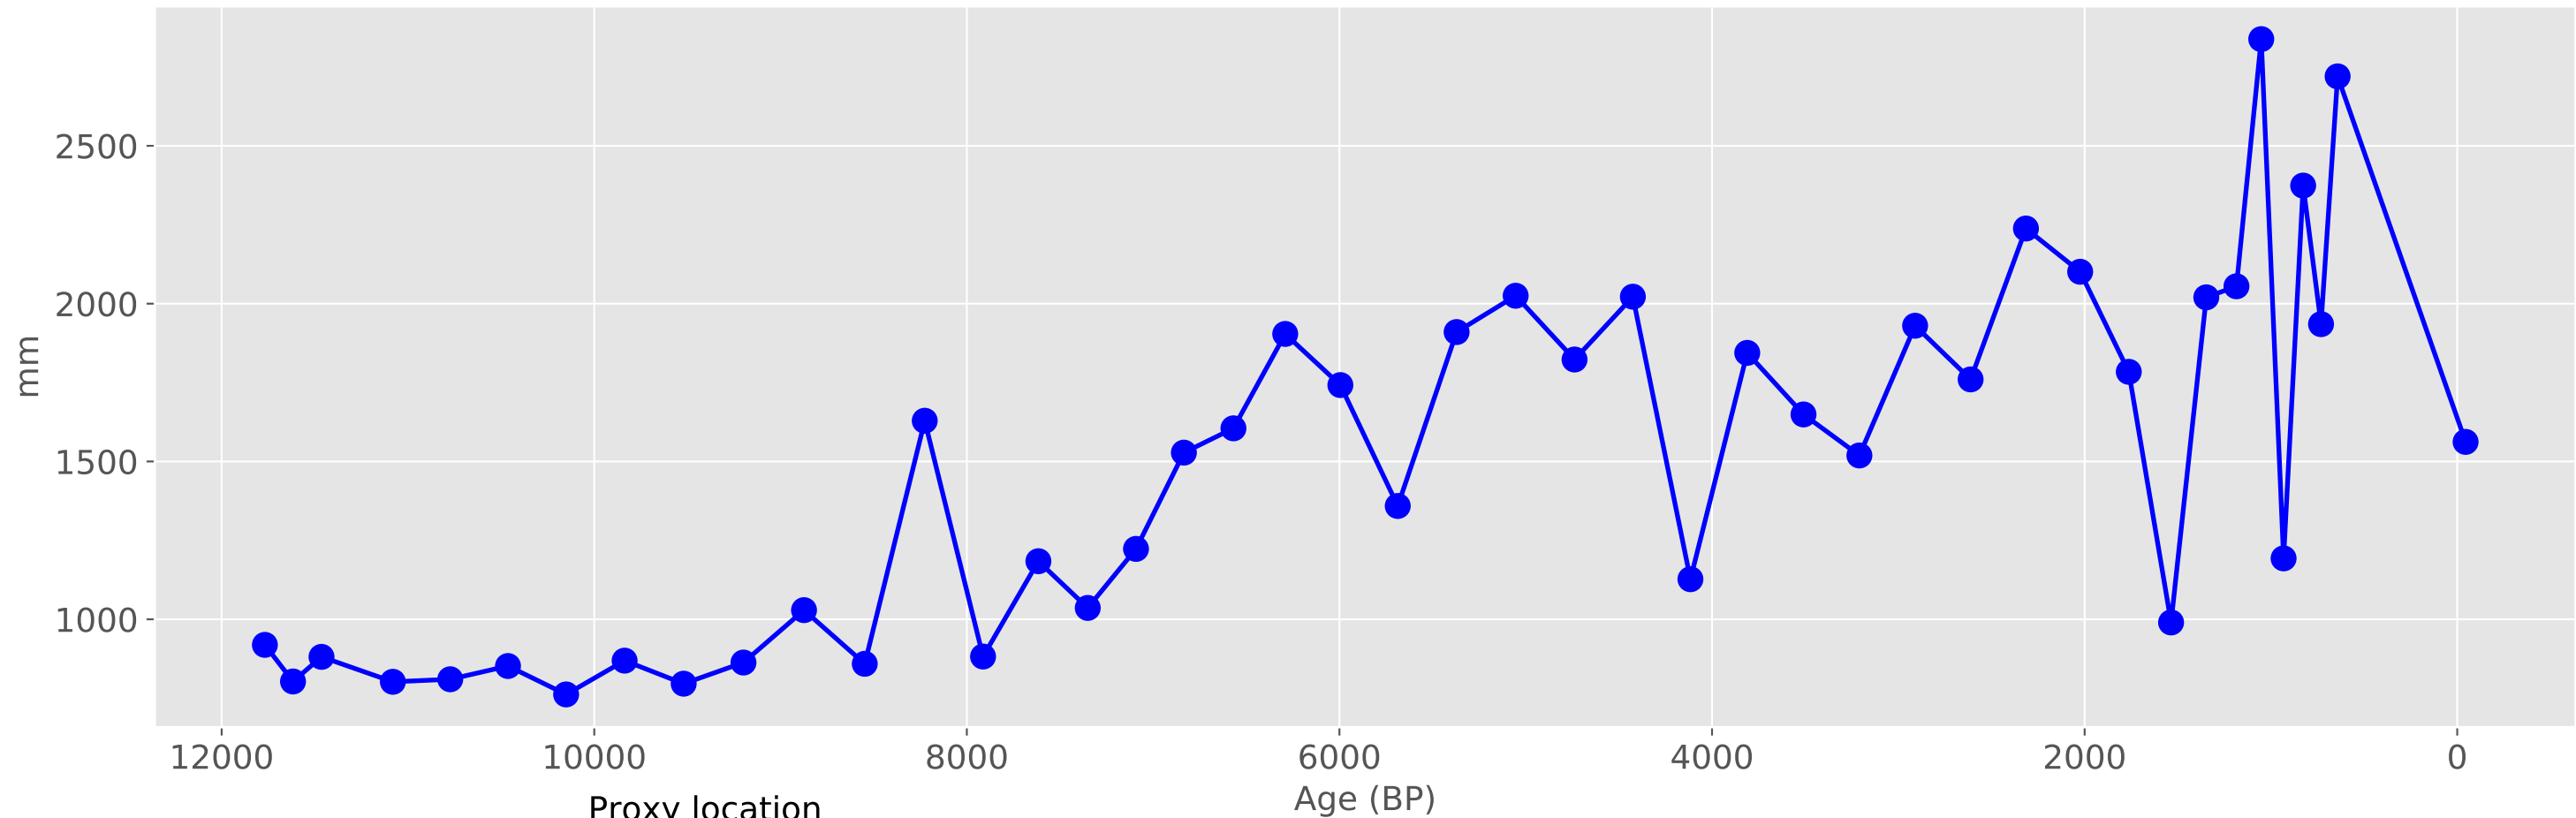

Proxy location  
(49.18 ° N, 124.16 ° W)

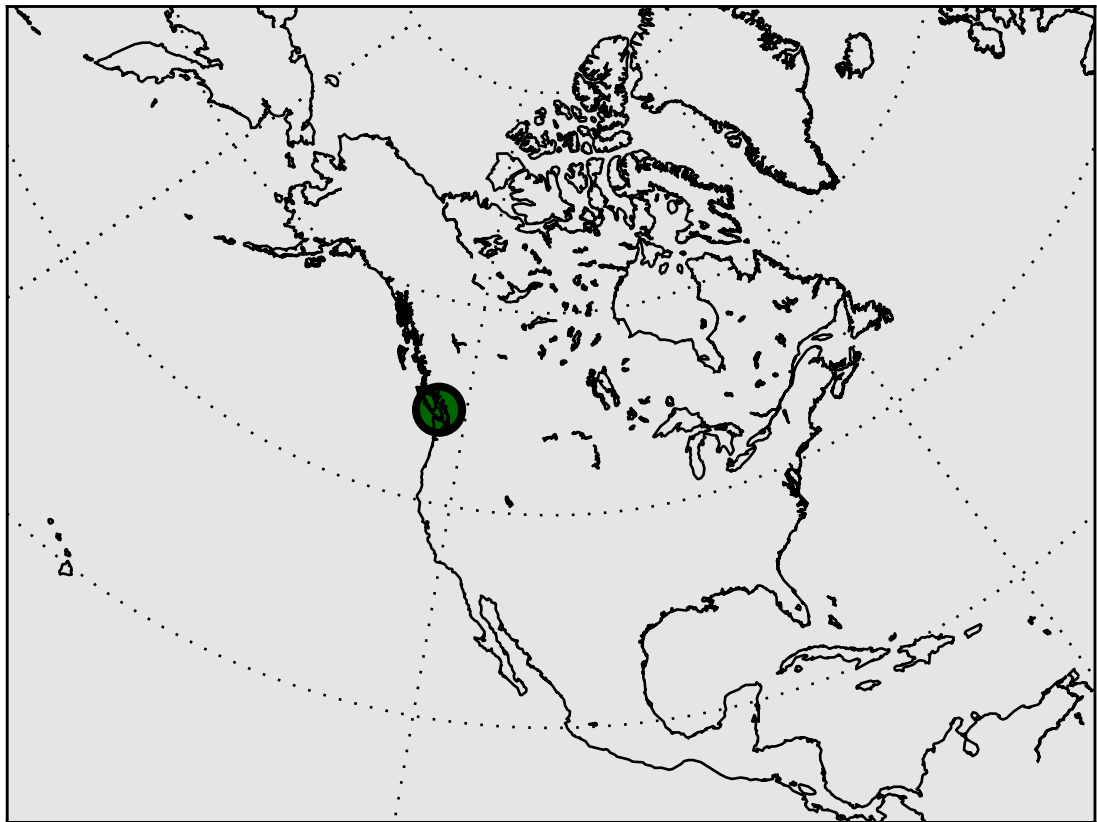

|                    |                                                       |
|--------------------|-------------------------------------------------------|
| Dataset name:      | BoomerangLake.Brown.2006                              |
| Archive type:      | LakeSediment                                          |
| Proxy type:        | pollen                                                |
| Variable name:     | precipitation                                         |
| Latitude ( ° N):   | 49.18                                                 |
| Longitude ( ° E):  | -124.16                                               |
| Elevation (m):     | 361.0                                                 |
| Interp. variable:  | P                                                     |
| Interp. detail:    | amount@surface                                        |
| Interp. season:    | annual                                                |
| Interp. direction: | positive                                              |
| Pub. 1 title:      | Holocene precipitation in the coastal temperate ra... |
| Pub. 1 authors:    | Brown, K.J.;Fitton, R.J.;Schoups, G.;Allen, G.B.;W... |
| Pub. 1 year:       | 2006                                                  |
| Pub. 1 DOI:        | 10.1016/j.quascirev.2006.02.020                       |
| Original data URL: | wNA                                                   |

Proxy data and metadata

LakeSediment | pollen | KoksilahRiverDischarge.Brown.2015 | WEB03bfeb7c

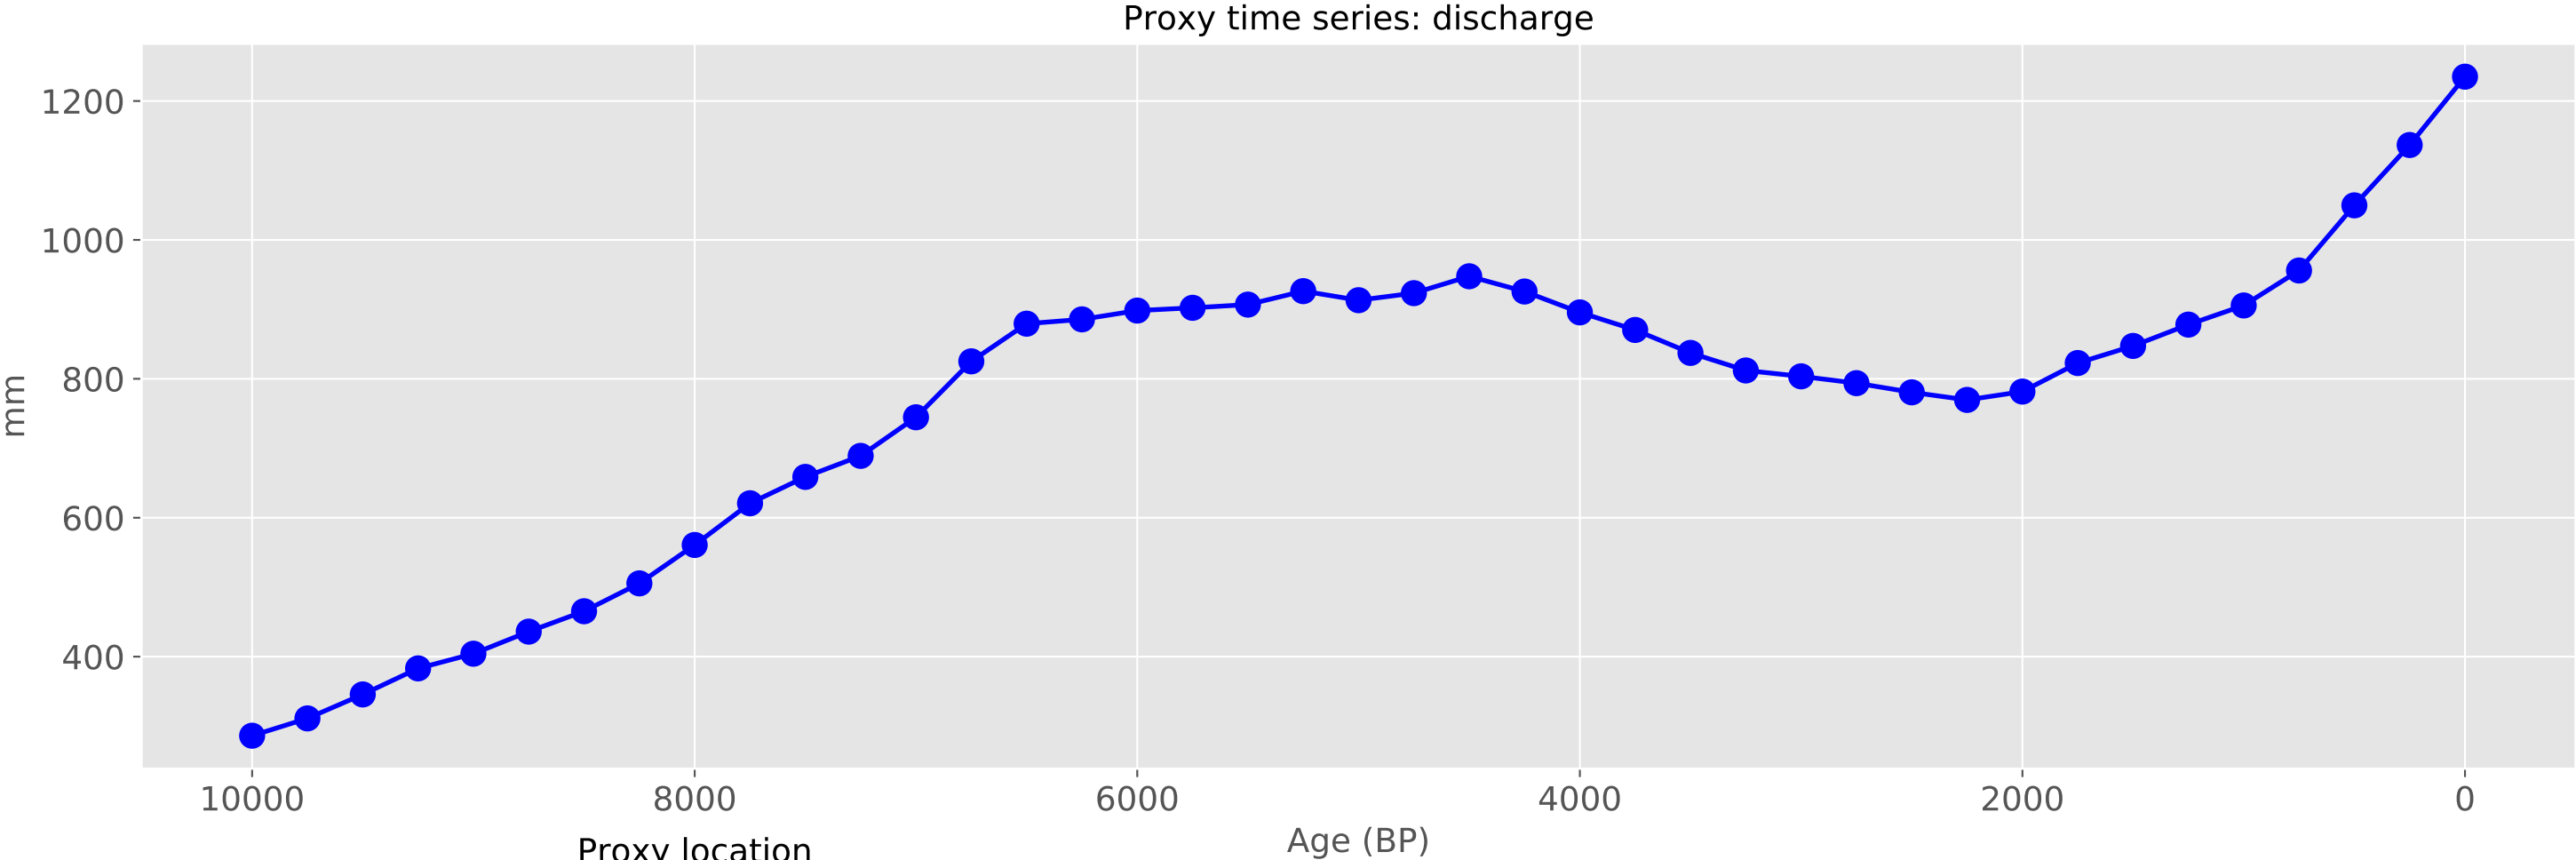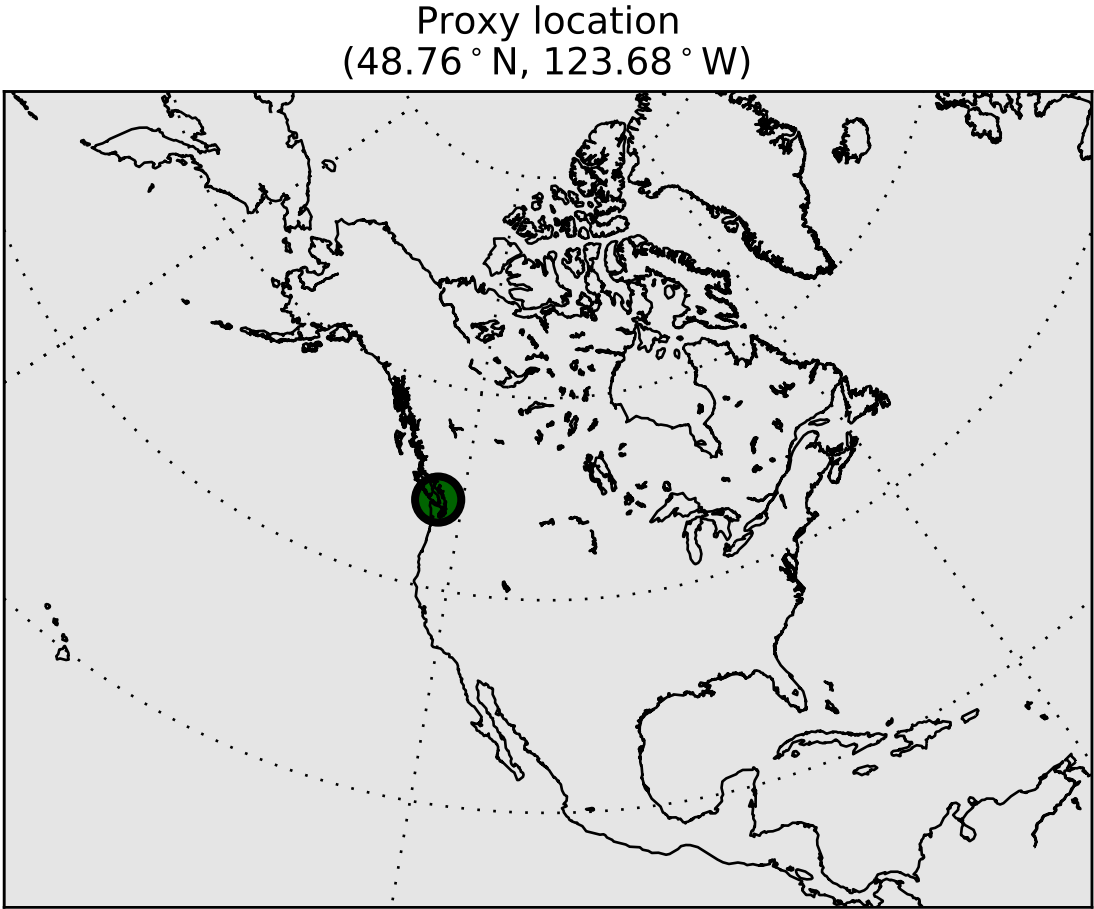

|                    |                                                       |
|--------------------|-------------------------------------------------------|
| Dataset name:      | KoksilahRiverDischarge.Brown.2015                     |
| Archive type:      | LakeSediment                                          |
| Proxy type:        | pollen                                                |
| Variable name:     | discharge                                             |
| Latitude ( ° N):   | 48.755                                                |
| Longitude ( ° E):  | -123.682                                              |
| Elevation (m):     | 14.0                                                  |
| Interp. variable:  | P                                                     |
| Interp. detail:    | riverFlow@surface                                     |
| Interp. season:    | winter+                                               |
| Interp. direction: | positive                                              |
| Pub. 1 title:      | Multi-millennial streamflow dynamics in two forest... |
| Pub. 1 authors:    | Brown, Kendrick J.                                    |
| Pub. 1 year:       | 2015                                                  |
| Pub. 1 DOI:        | 10.1016/j.yqres.2015.03.003                           |
| Original data URL: | wNAm                                                  |

Proxy data and metadata

LakeSediment | pollen | KoksilahRiverDischarge.Brown.2015 | WEBee9de363

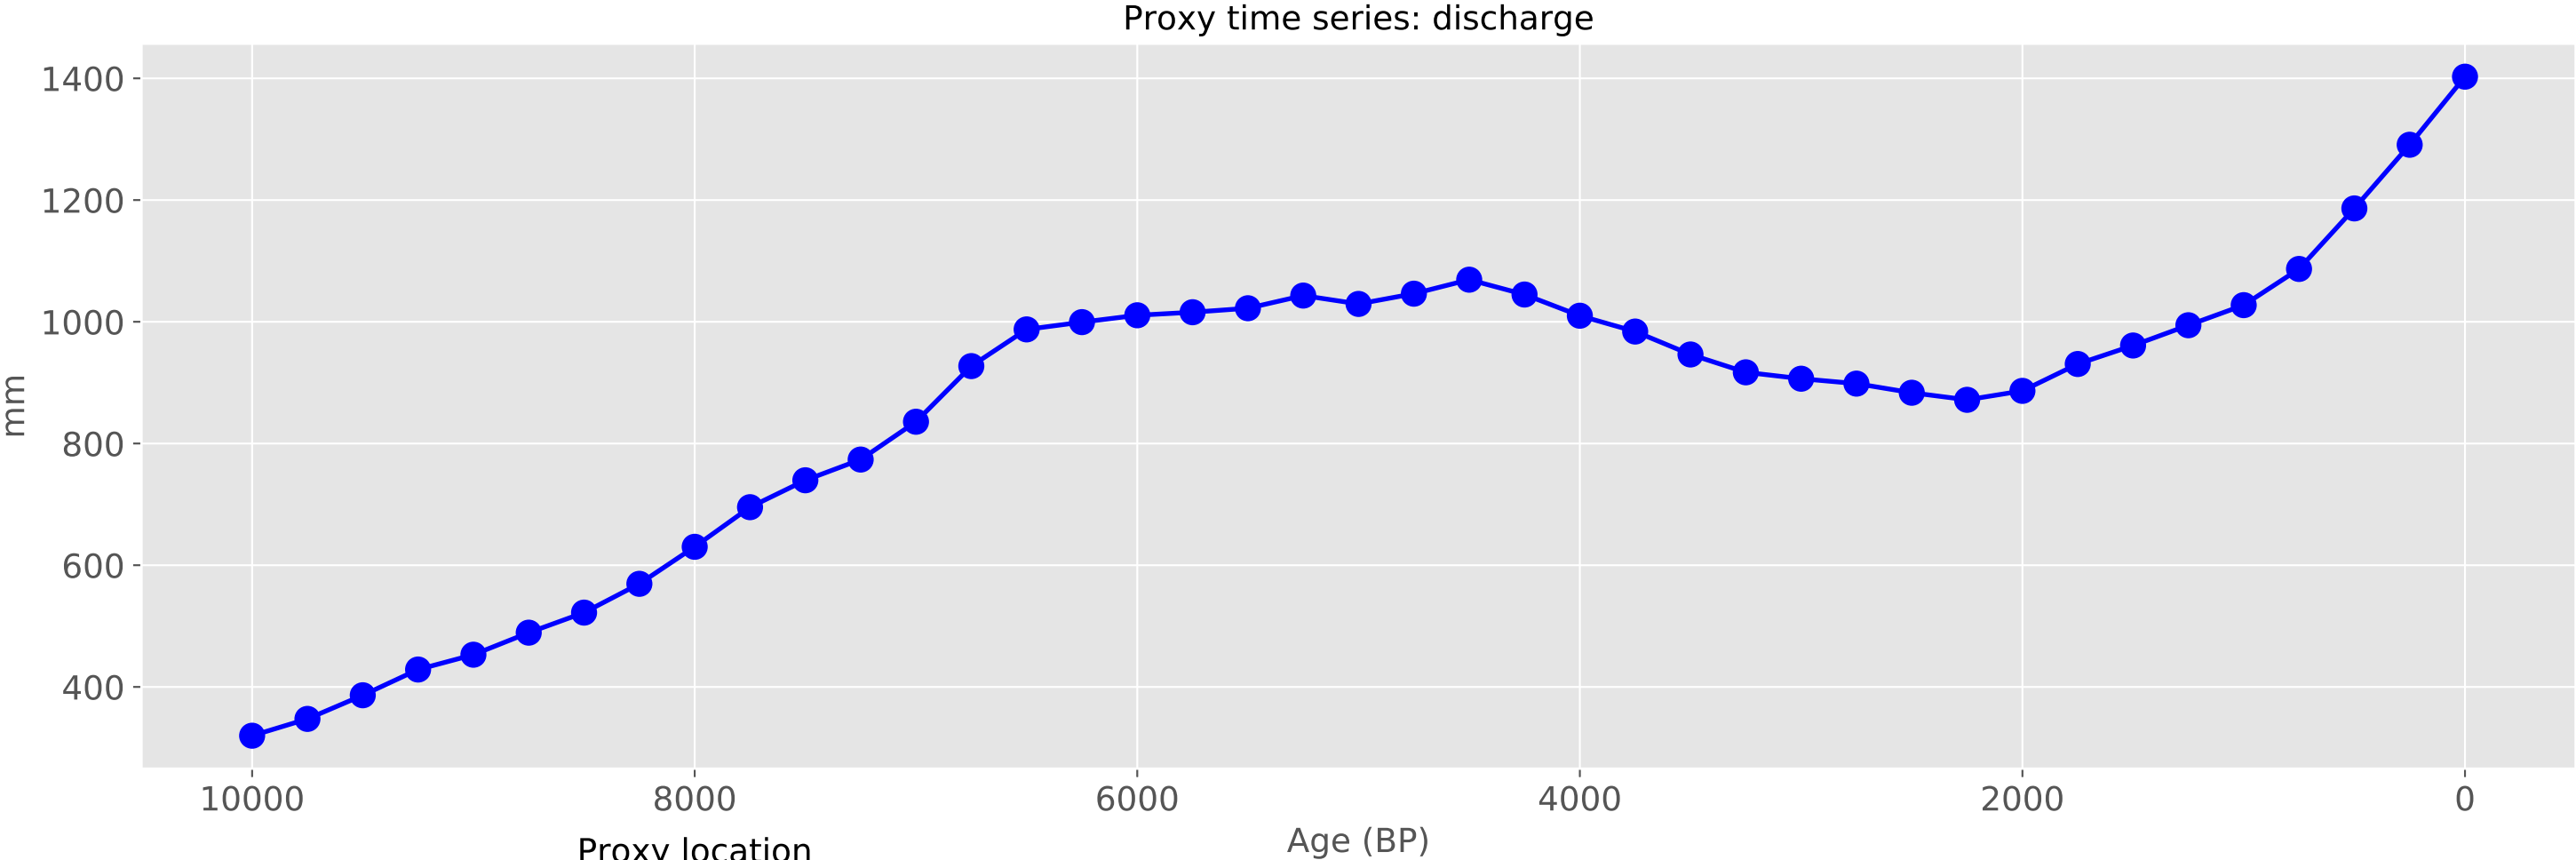

|                    |                                                       |
|--------------------|-------------------------------------------------------|
| Dataset name:      | KoksilahRiverDischarge.Brown.2015                     |
| Archive type:      | LakeSediment                                          |
| Proxy type:        | pollen                                                |
| Variable name:     | discharge                                             |
| Latitude ( ° N):   | 48.755                                                |
| Longitude ( ° E):  | -123.682                                              |
| Elevation (m):     | 14.0                                                  |
| Interp. variable:  | P                                                     |
| Interp. detail:    | riverFlow@surface                                     |
| Interp. season:    | annual                                                |
| Interp. direction: | positive                                              |
| Pub. 1 title:      | Multi-millennial streamflow dynamics in two forest... |
| Pub. 1 authors:    | Brown, Kendrick J.                                    |
| Pub. 1 year:       | 2015                                                  |
| Pub. 1 DOI:        | 10.1016/j.yqres.2015.03.003                           |
| Original data URL: | wNAm                                                  |

Proxy data and metadata

LakeSediment | pollen | KoksilahRiverDischarge.Brown.2015 | WEBfb8e4899

Proxy time series: discharge

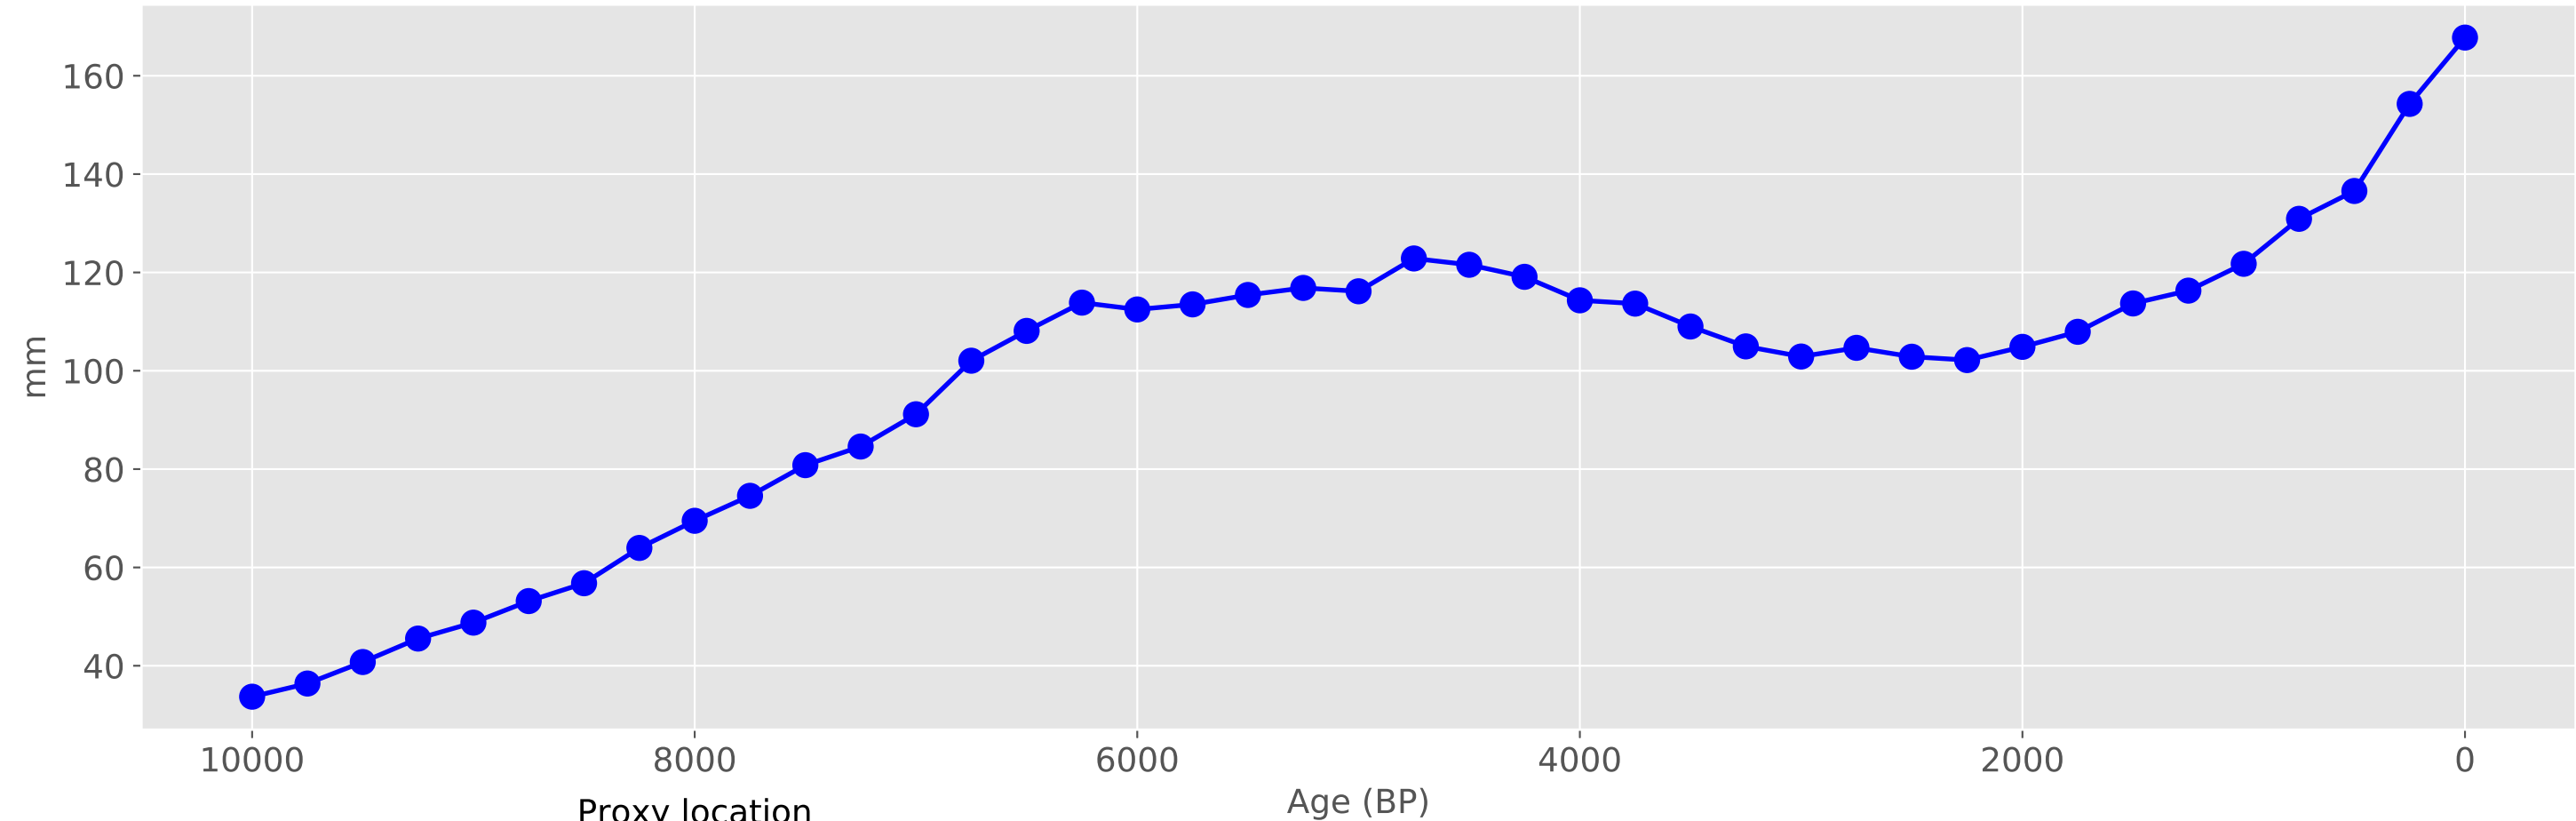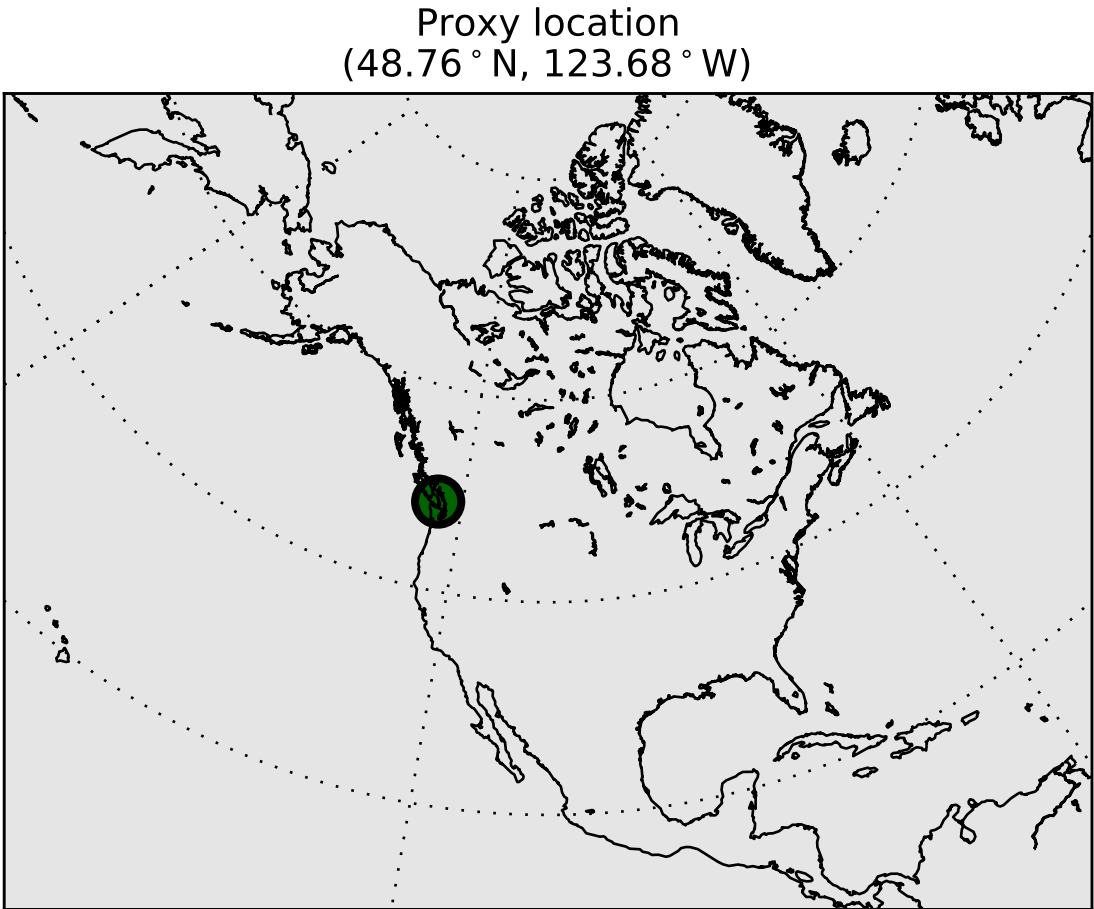

|                    |                                                       |
|--------------------|-------------------------------------------------------|
| Dataset name:      | KoksilahRiverDischarge.Brown.2015                     |
| Archive type:      | LakeSediment                                          |
| Proxy type:        | pollen                                                |
| Variable name:     | discharge                                             |
| Latitude ( ° N):   | 48.755                                                |
| Longitude ( ° E):  | -123.682                                              |
| Elevation (m):     | 14.0                                                  |
| Interp. variable:  | P                                                     |
| Interp. detail:    | riverFlow@surface                                     |
| Interp. season:    | summer+                                               |
| Interp. direction: | positive                                              |
| Pub. 1 title:      | Multi-millennial streamflow dynamics in two forest... |
| Pub. 1 authors:    | Brown, Kendrick J.                                    |
| Pub. 1 year:       | 2015                                                  |
| Pub. 1 DOI:        | 10.1016/j.yqres.2015.03.003                           |
| Original data URL: | wNAm                                                  |



Proxy data and metadata  
LakeSediment | pollen | RhamnusLake.Brown.2006 | WEB4581c605

Proxy time series: precipitation

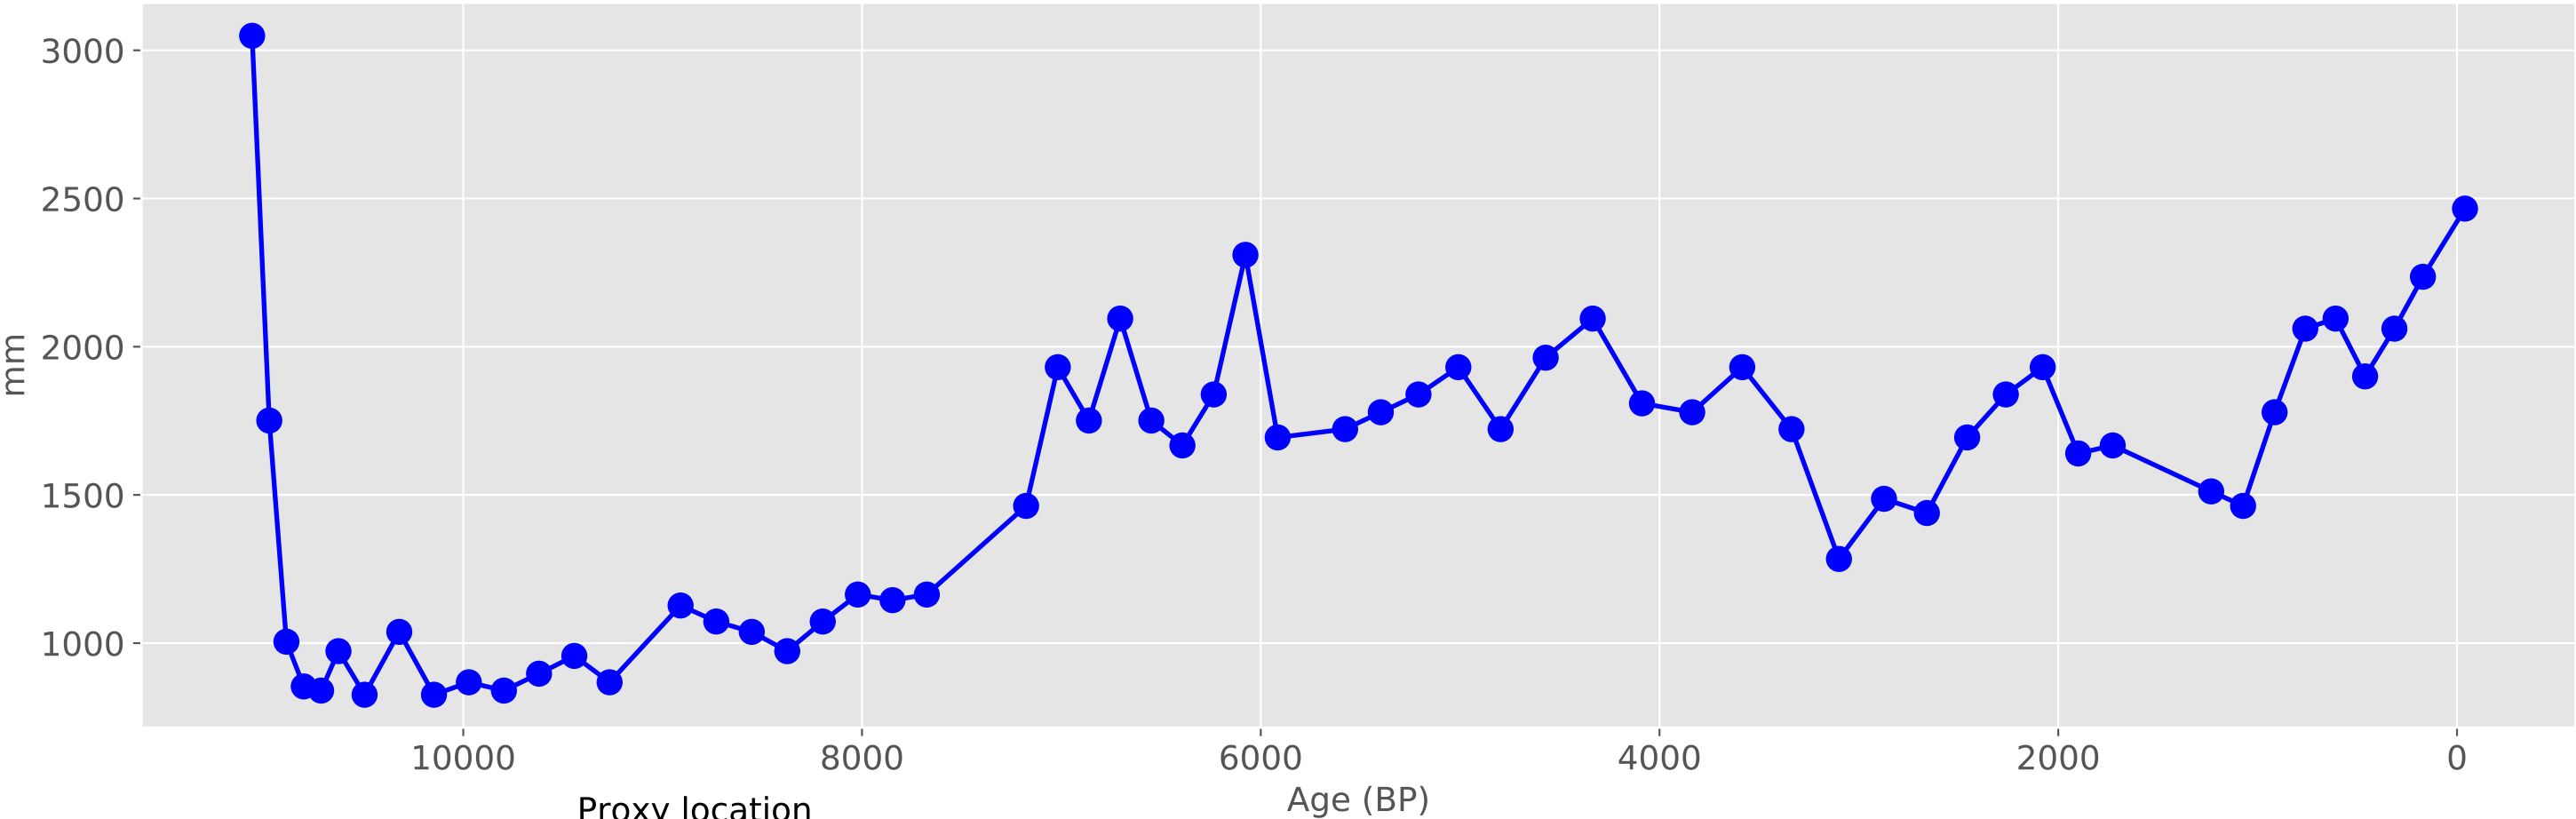

Proxy location  
(48.63 ° N, 123.72 ° W)

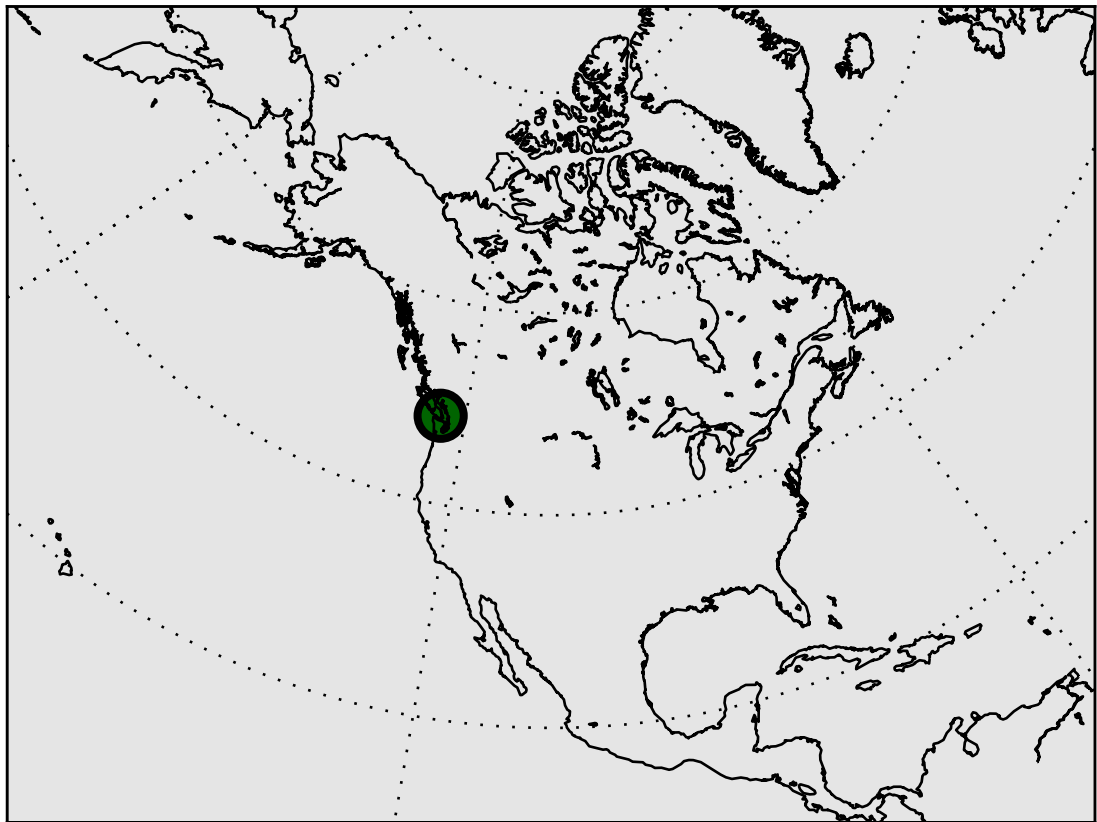

|                    |                                                       |
|--------------------|-------------------------------------------------------|
| Dataset name:      | RhamnusLake.Brown.2006                                |
| Archive type:      | LakeSediment                                          |
| Proxy type:        | pollen                                                |
| Variable name:     | precipitation                                         |
| Latitude ( ° N):   | 48.63                                                 |
| Longitude ( ° E):  | -123.72                                               |
| Elevation (m):     | 324.0                                                 |
| Interp. variable:  | P                                                     |
| Interp. detail:    | amount@surface                                        |
| Interp. season:    | annual                                                |
| Interp. direction: | positive                                              |
| Pub. 1 title:      | Holocene precipitation in the coastal temperate ra... |
| Pub. 1 authors:    | Brown, K.J.;Fitton, R.J.;Schoups, G.;Allen, G.B.;W... |
| Pub. 1 year:       | 2006                                                  |
| Pub. 1 DOI:        | 10.1016/j.quascirev.2006.02.020                       |
| Original data URL: | wNAm                                                  |

Proxy data and metadata

LakeSediment | pollen | BegbieLake.Brown.2019 | WEB22bcae59

Proxy time series: precipitation

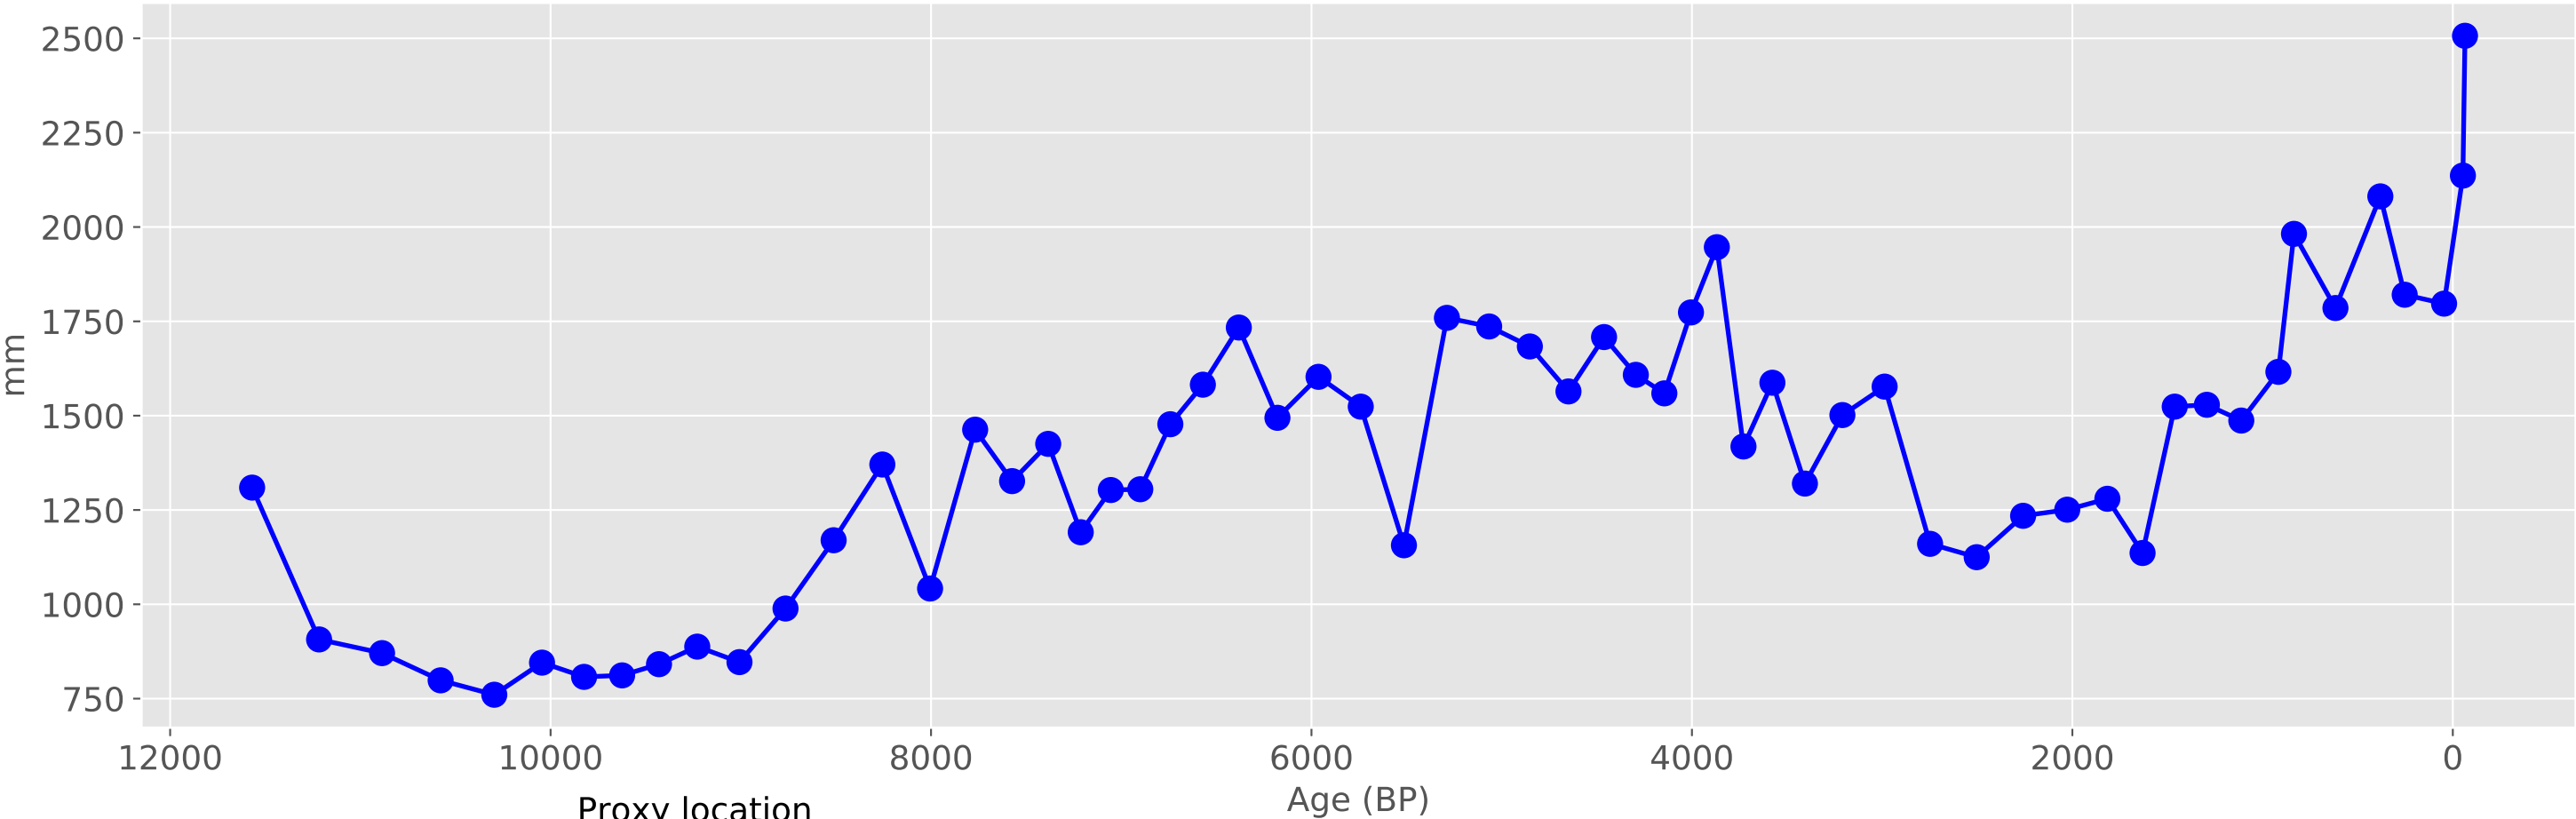

Proxy location  
(48.59 ° N, 123.68 ° W)

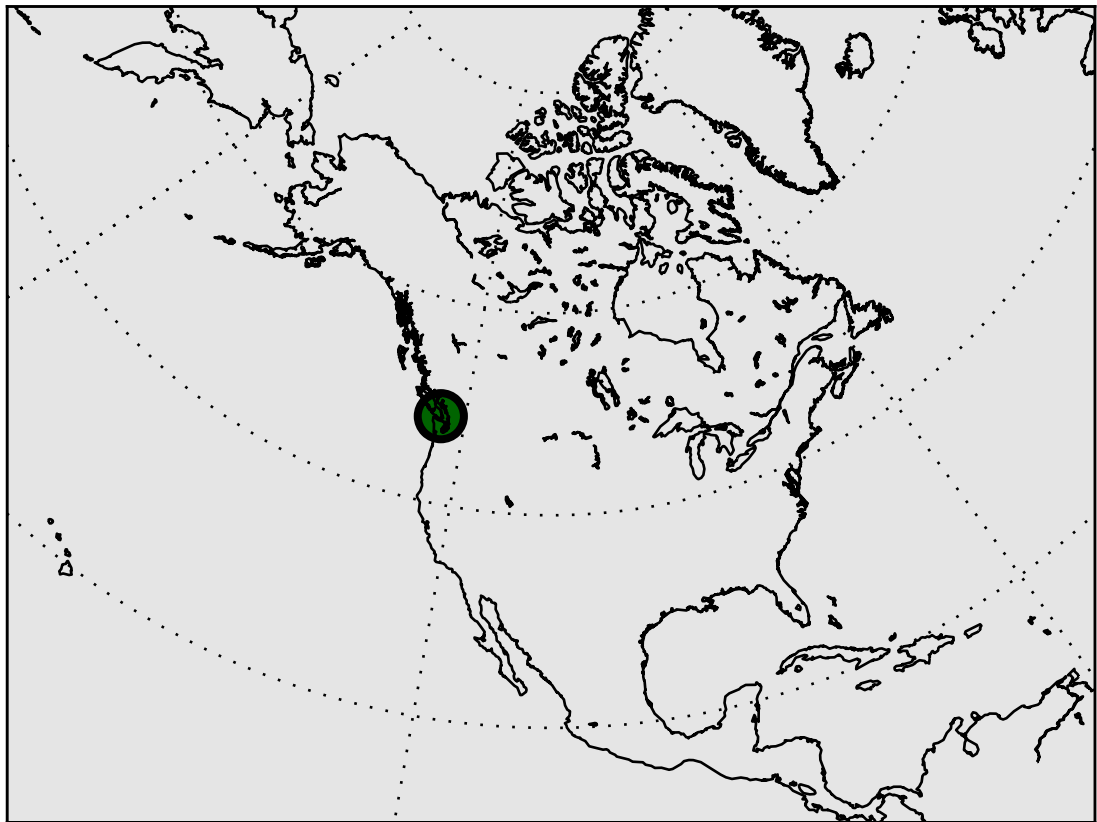

|                    |                                                       |
|--------------------|-------------------------------------------------------|
| Dataset name:      | BegbieLake.Brown.2019                                 |
| Archive type:      | LakeSediment                                          |
| Proxy type:        | pollen                                                |
| Variable name:     | precipitation                                         |
| Latitude ( ° N):   | 48.59                                                 |
| Longitude ( ° E):  | -123.68                                               |
| Elevation (m):     | 188.0                                                 |
| Interp. variable:  | P                                                     |
| Interp. detail:    | amount@surface                                        |
| Interp. season:    | annual                                                |
| Interp. direction: | positive                                              |
| Pub. 1 title:      | Long-term climate, vegetation and fire regime chan... |
| Pub. 1 authors:    | Brown, KJ;Hebda, NJR;Schoups, G;Conder, N;Smith, K... |
| Pub. 1 year:       | 2019                                                  |
| Pub. 1 DOI:        | 10.1177/0959683619854523                              |
| Original data URL: | wNAm                                                  |

Proxy data and metadata

LakeSediment | pollen | SanJuanRiverDischarge.Brown.2015 | RfGJoKUfVmu

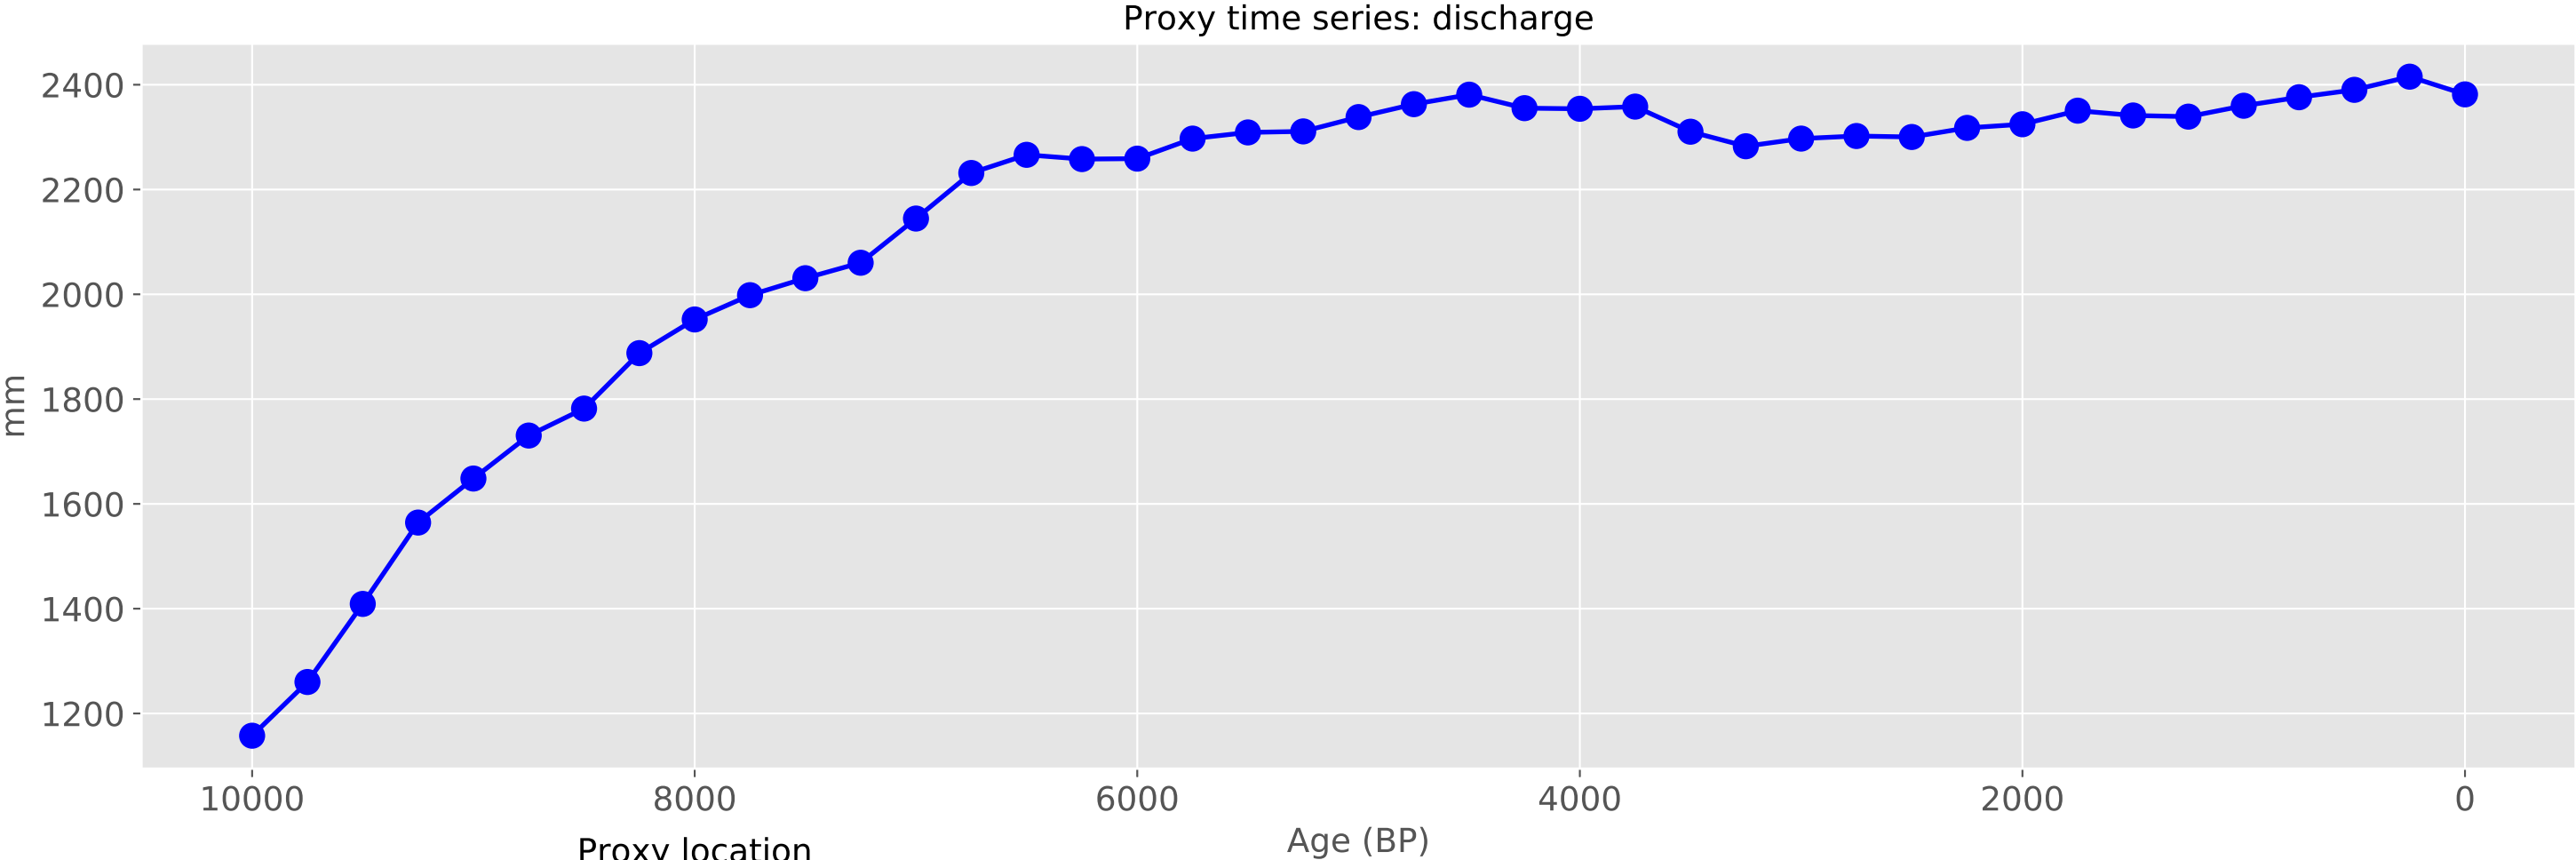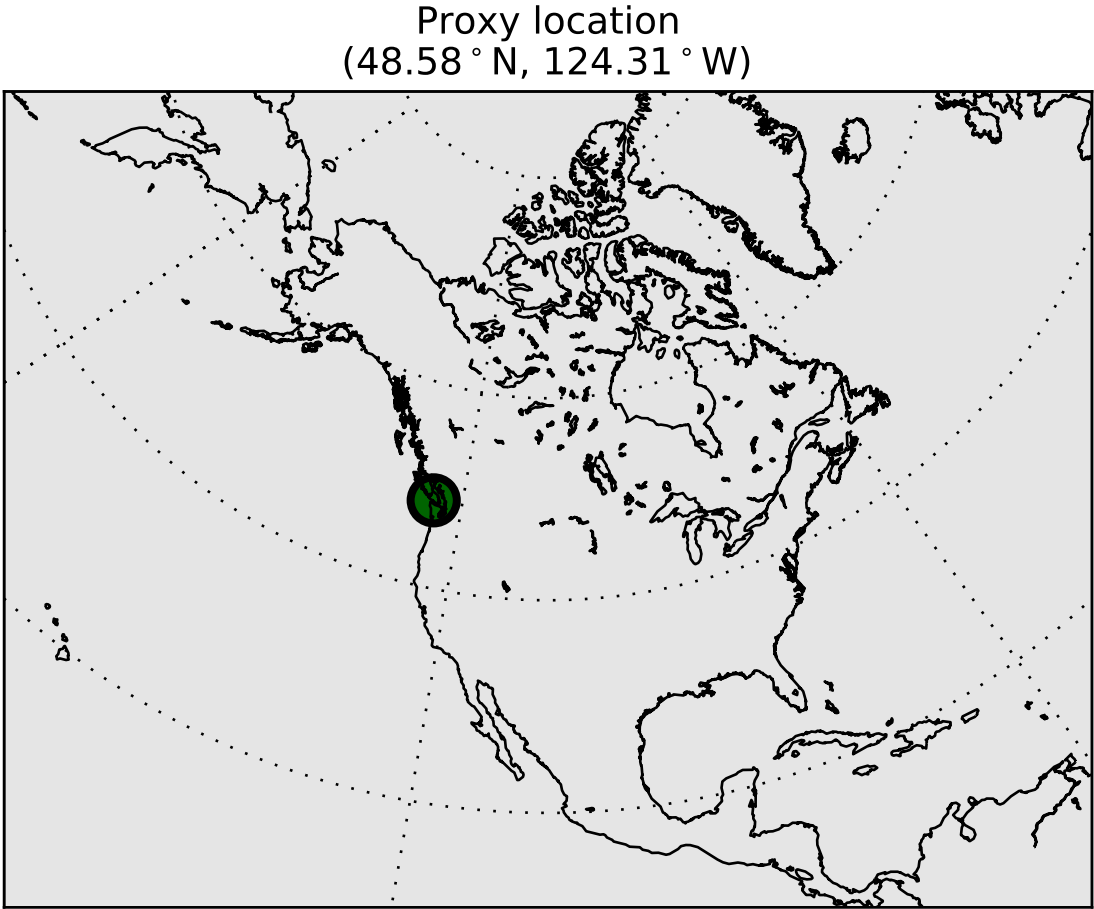

|                    |                                                       |
|--------------------|-------------------------------------------------------|
| Dataset name:      | SanJuanRiverDischarge.Brown.2015                      |
| Archive type:      | LakeSediment                                          |
| Proxy type:        | pollen                                                |
| Variable name:     | discharge                                             |
| Latitude ( ° N):   | 48.58                                                 |
| Longitude ( ° E):  | -124.31                                               |
| Elevation (m):     | 0.0                                                   |
| Interp. variable:  | P                                                     |
| Interp. detail:    | riverFlow@surface                                     |
| Interp. season:    | winter+                                               |
| Interp. direction: | positive                                              |
| Pub. 1 title:      | Multi-millennial streamflow dynamics in two forest... |
| Pub. 1 authors:    | Brown, Kendrick J.                                    |
| Pub. 1 year:       | 2015                                                  |
| Pub. 1 DOI:        | 10.1016/j.yqres.2015.03.003                           |
| Original data URL: | wNAm                                                  |

Proxy data and metadata

LakeSediment | pollen | SanJuanRiverDischarge.Brown.2015 | RyF738oKbV5

Proxy time series: discharge

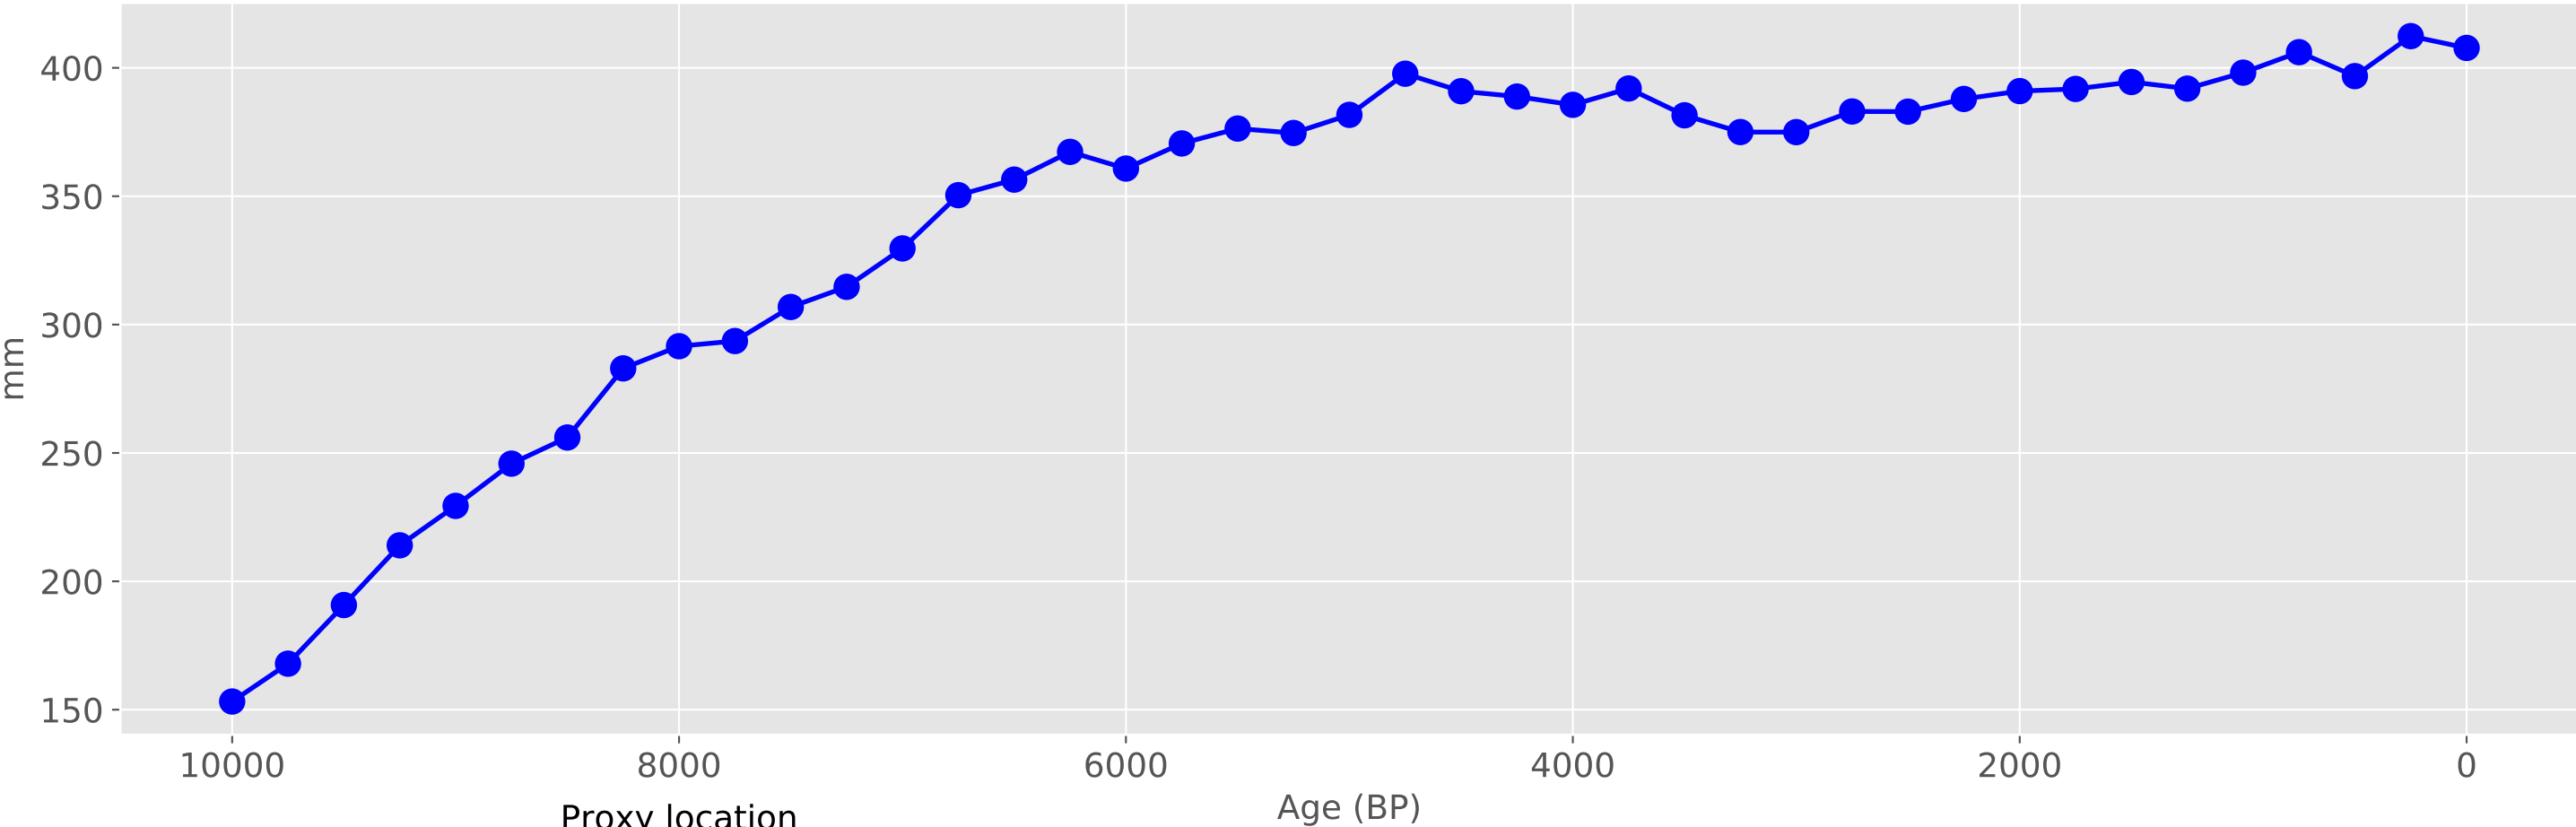

Proxy location  
(48.58 ° N, 124.31 ° W)

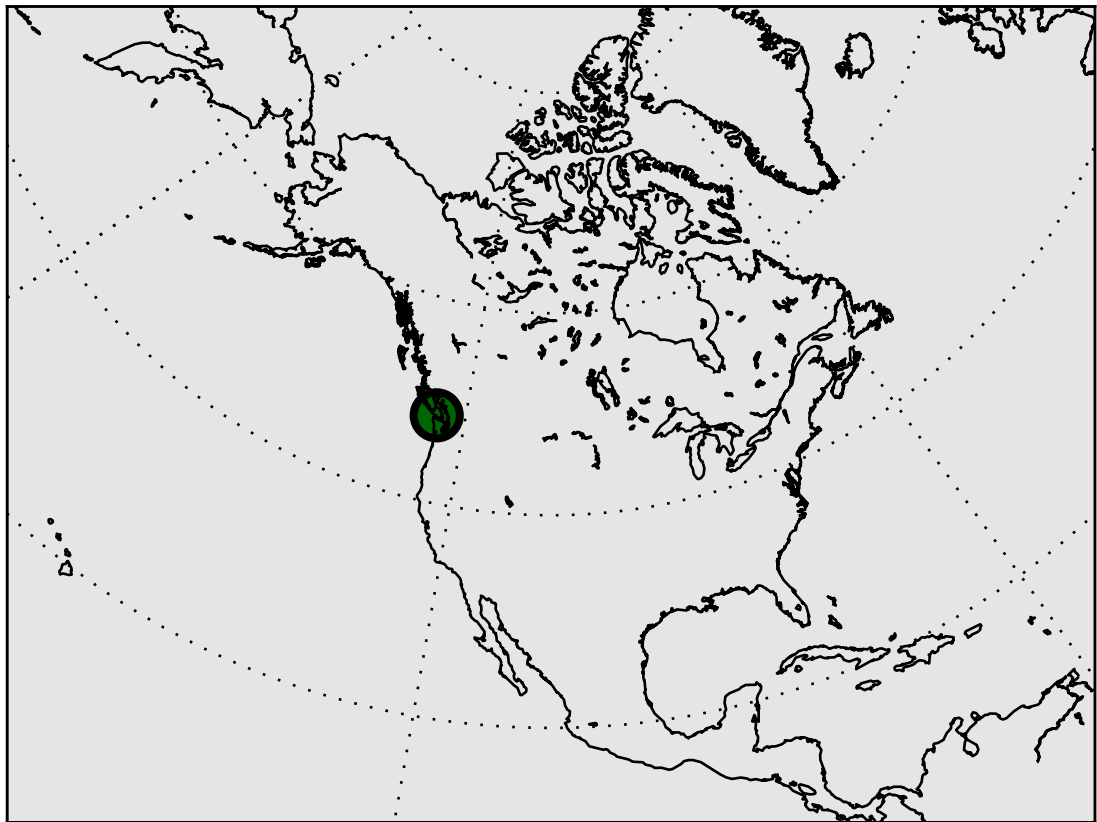

|                    |                                                       |
|--------------------|-------------------------------------------------------|
| Dataset name:      | SanJuanRiverDischarge.Brown.2015                      |
| Archive type:      | LakeSediment                                          |
| Proxy type:        | pollen                                                |
| Variable name:     | discharge                                             |
| Latitude ( ° N):   | 48.58                                                 |
| Longitude ( ° E):  | -124.31                                               |
| Elevation (m):     | 0.0                                                   |
| Interp. variable:  | P                                                     |
| Interp. detail:    | riverFlow@surface                                     |
| Interp. season:    | summer+                                               |
| Interp. direction: | positive                                              |
| Pub. 1 title:      | Multi-millennial streamflow dynamics in two forest... |
| Pub. 1 authors:    | Brown, Kendrick J.                                    |
| Pub. 1 year:       | 2015                                                  |
| Pub. 1 DOI:        | 10.1016/j.yqres.2015.03.003                           |
| Original data URL: | wNAm                                                  |

Proxy data and metadata

LakeSediment | pollen | SanJuanRiverDischarge.Brown.2015 | WEB2dfe3174

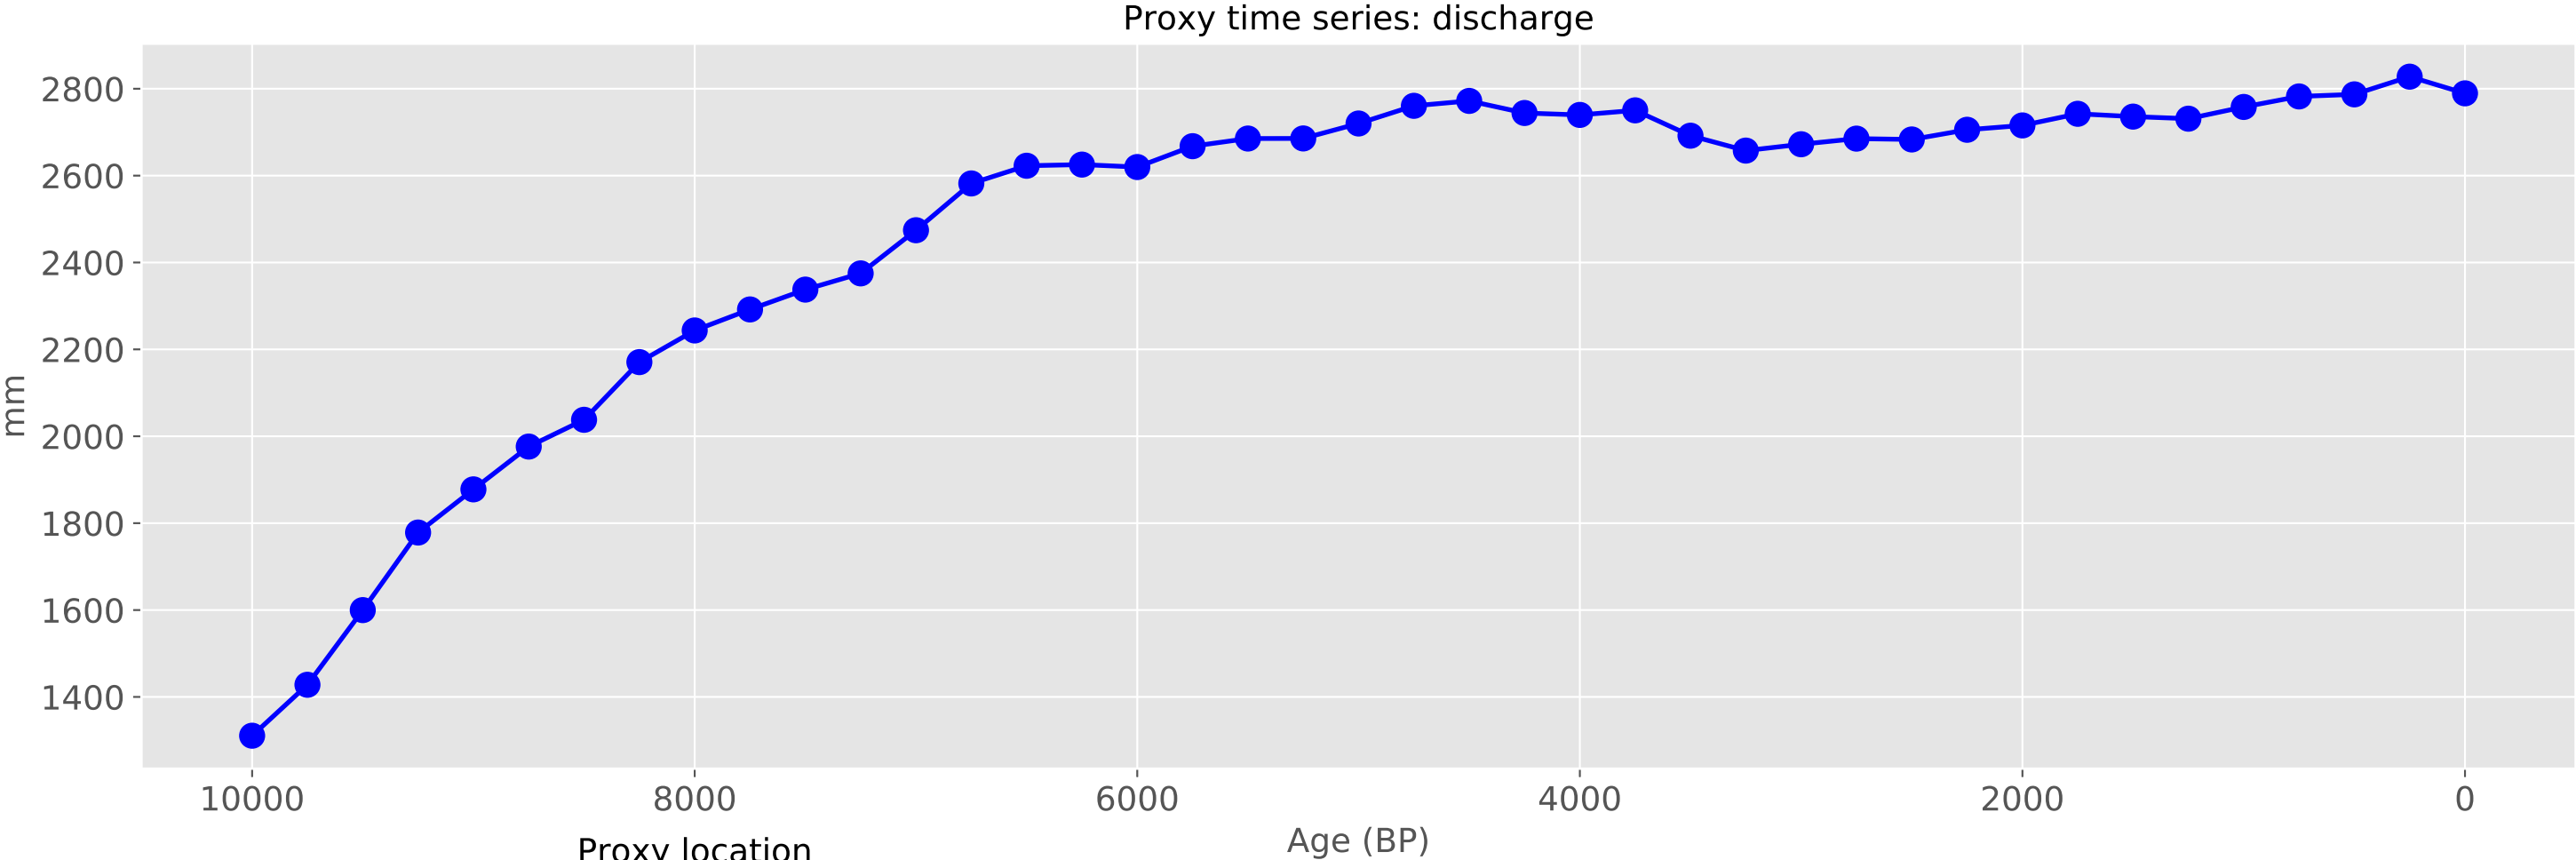

|                    |                                                       |
|--------------------|-------------------------------------------------------|
| Dataset name:      | SanJuanRiverDischarge.Brown.2015                      |
| Archive type:      | LakeSediment                                          |
| Proxy type:        | pollen                                                |
| Variable name:     | discharge                                             |
| Latitude ( ° N):   | 48.58                                                 |
| Longitude ( ° E):  | -124.31                                               |
| Elevation (m):     | 0.0                                                   |
| Interp. variable:  | P                                                     |
| Interp. detail:    | riverFlow@surface                                     |
| Interp. season:    | annual                                                |
| Interp. direction: | positive                                              |
| Pub. 1 title:      | Multi-millennial streamflow dynamics in two forest... |
| Pub. 1 authors:    | Brown, Kendrick J.                                    |
| Pub. 1 year:       | 2015                                                  |
| Pub. 1 DOI:        | 10.1016/j.yqres.2015.03.003                           |
| Original data URL: | wNA                                                   |

Proxy data and metadata  
LakeSediment | pollen | HealLake.Brown.2006 | WEB7ec5f35f

Proxy time series: precipitation

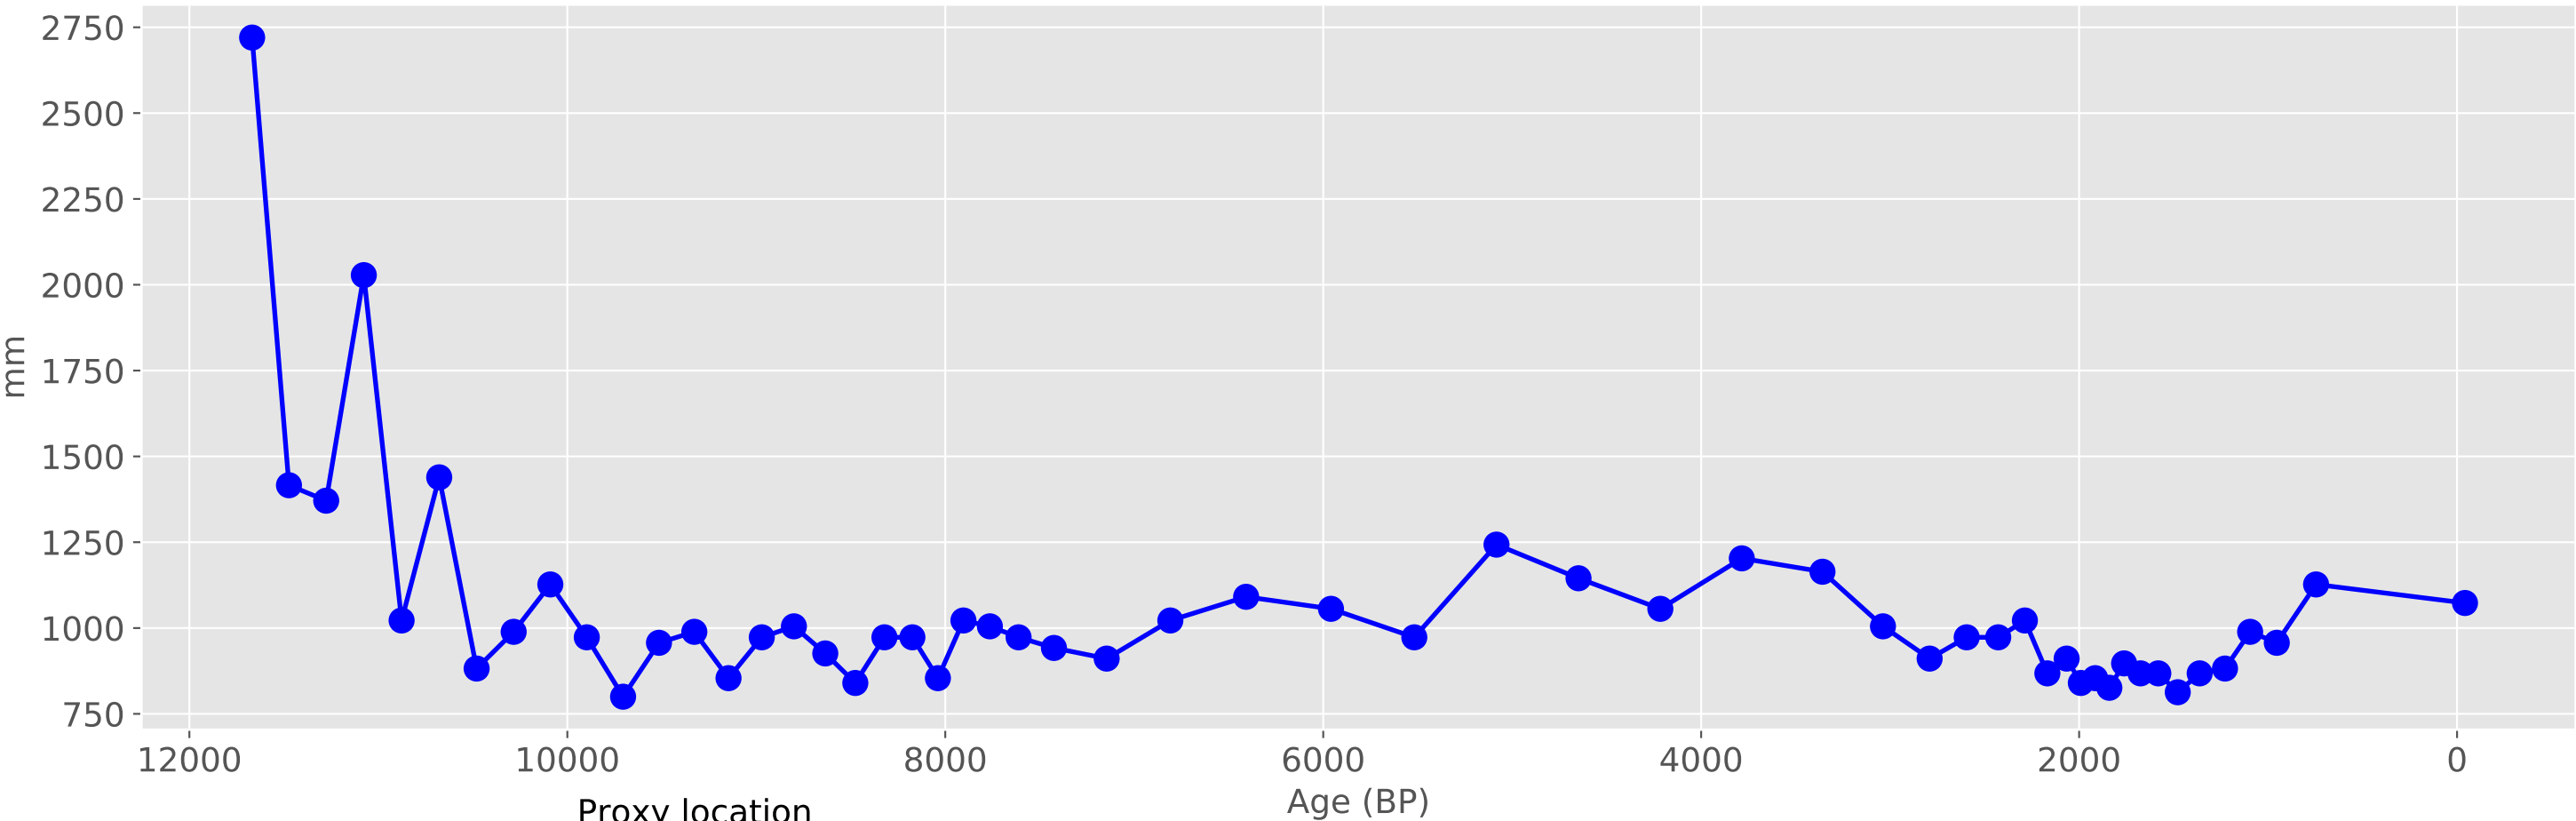

Proxy location  
(48.54 ° N, 123.46 ° W)

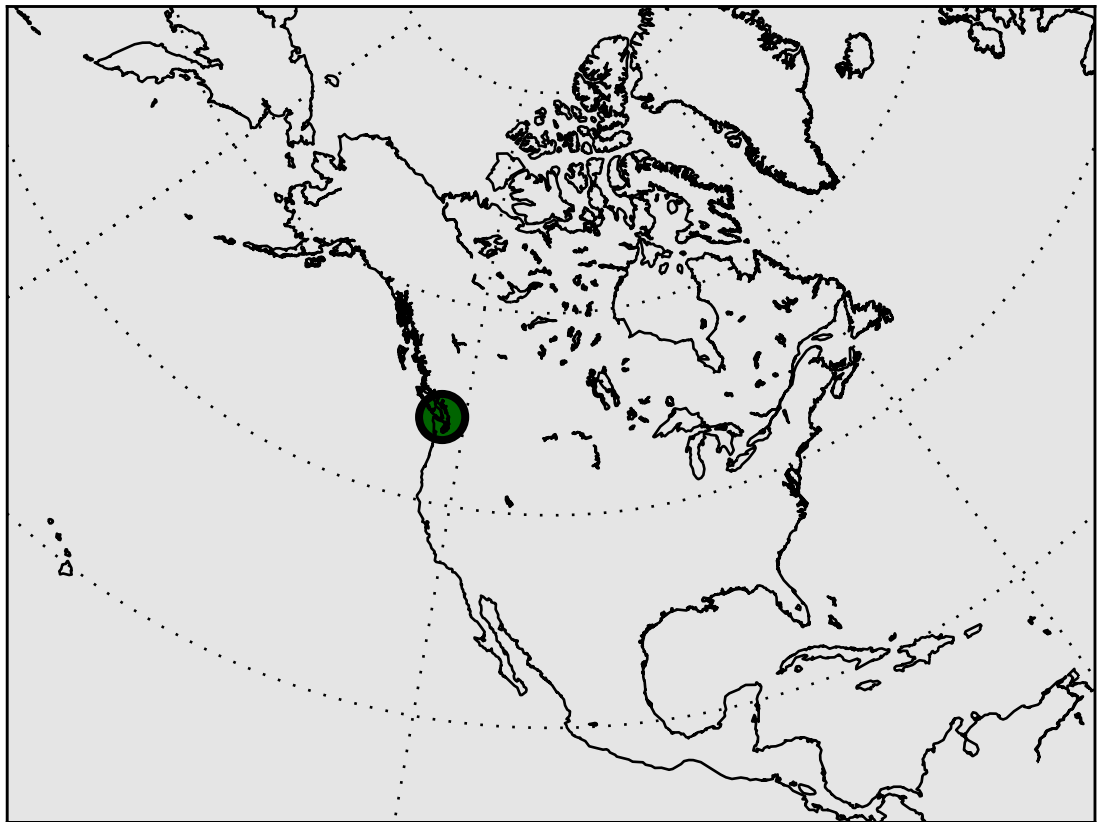

|                    |                                                       |
|--------------------|-------------------------------------------------------|
| Dataset name:      | HealLake.Brown.2006                                   |
| Archive type:      | LakeSediment                                          |
| Proxy type:        | pollen                                                |
| Variable name:     | precipitation                                         |
| Latitude ( ° N):   | 48.54                                                 |
| Longitude ( ° E):  | -123.46                                               |
| Elevation (m):     | 137.0                                                 |
| Interp. variable:  | P                                                     |
| Interp. detail:    | amount@surface                                        |
| Interp. season:    | annual                                                |
| Interp. direction: | positive                                              |
| Pub. 1 title:      | Holocene precipitation in the coastal temperate ra... |
| Pub. 1 authors:    | Brown, K.J.;Fitton, R.J.;Schoups, G.;Allen, G.B.;W... |
| Pub. 1 year:       | 2006                                                  |
| Pub. 1 DOI:        | 10.1016/j.quascirev.2006.02.020                       |
| Original data URL: | wNAm                                                  |



Proxy data and metadata  
LakeSediment | pollen | Pixie.Brown.2002 | M2L2g5c3hl4P

Proxy time series: temperature

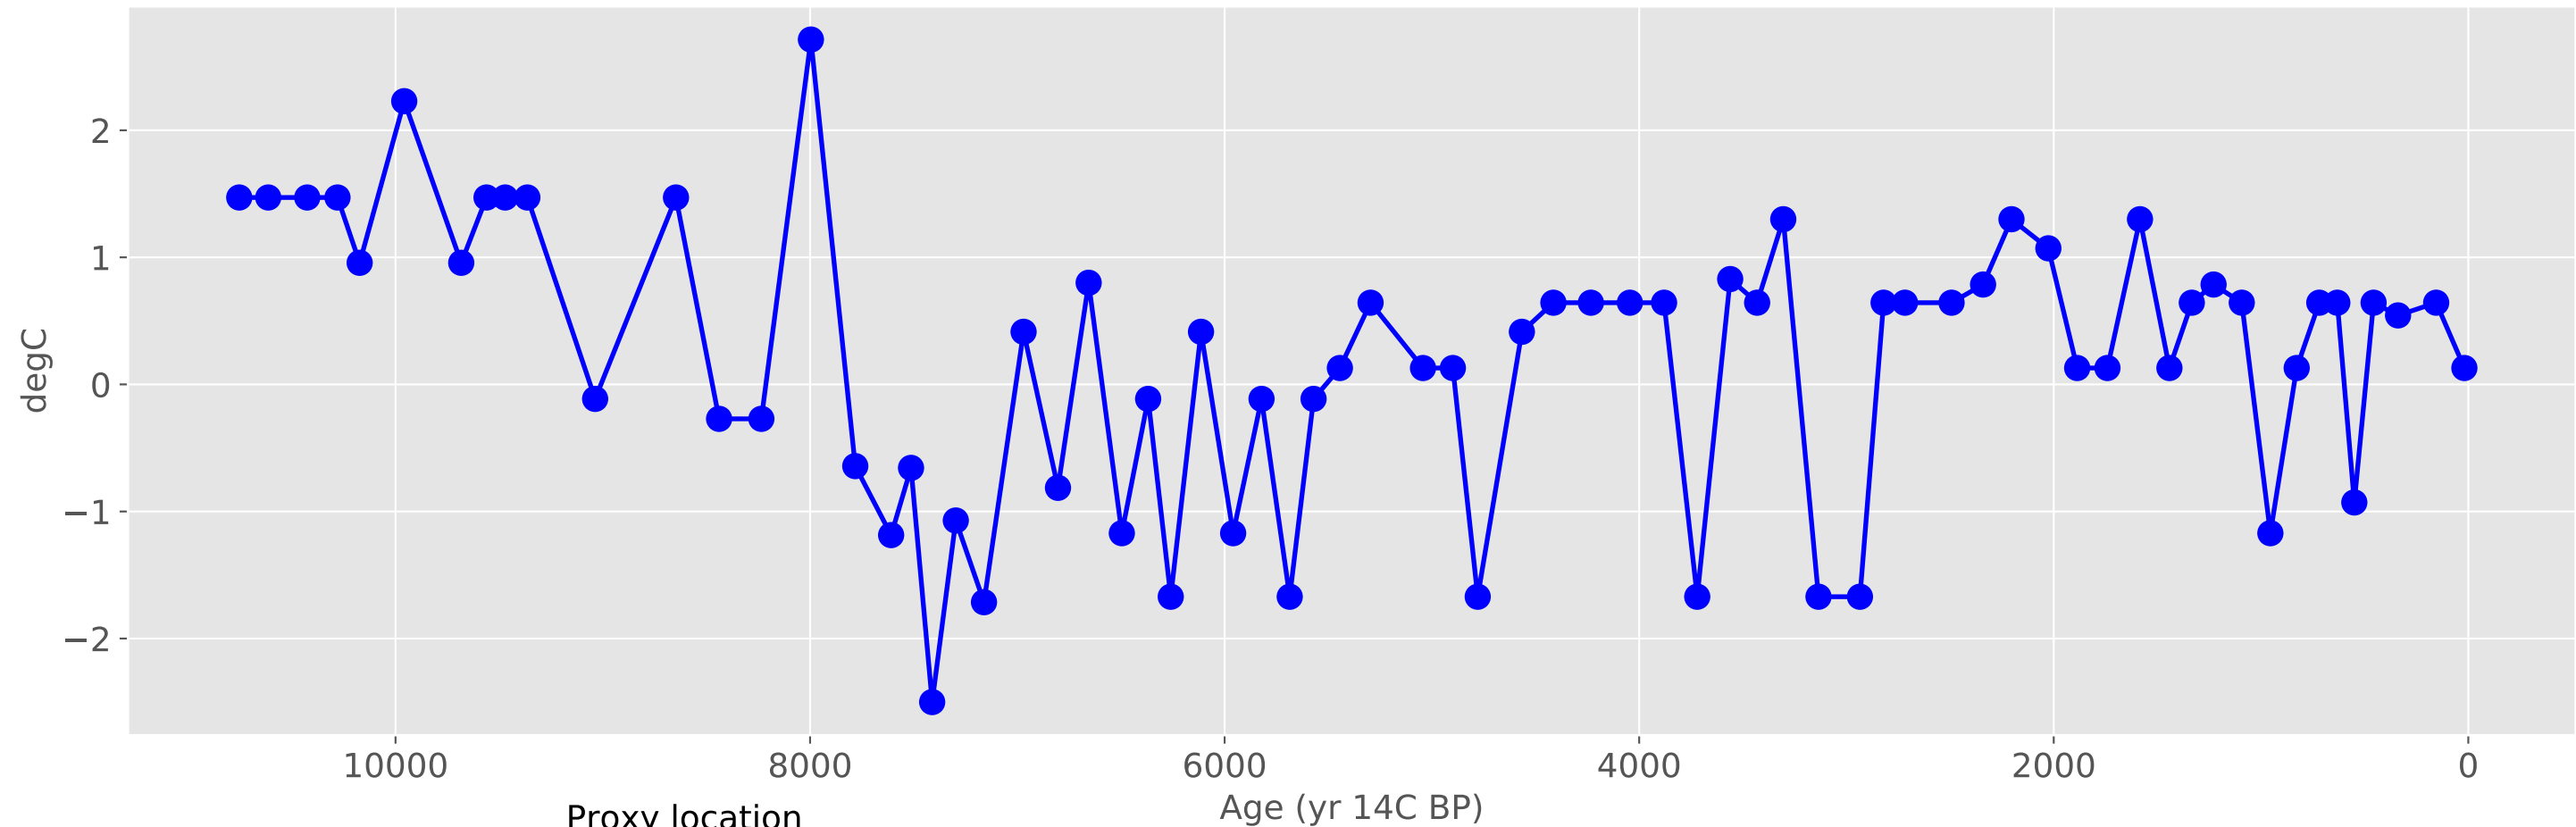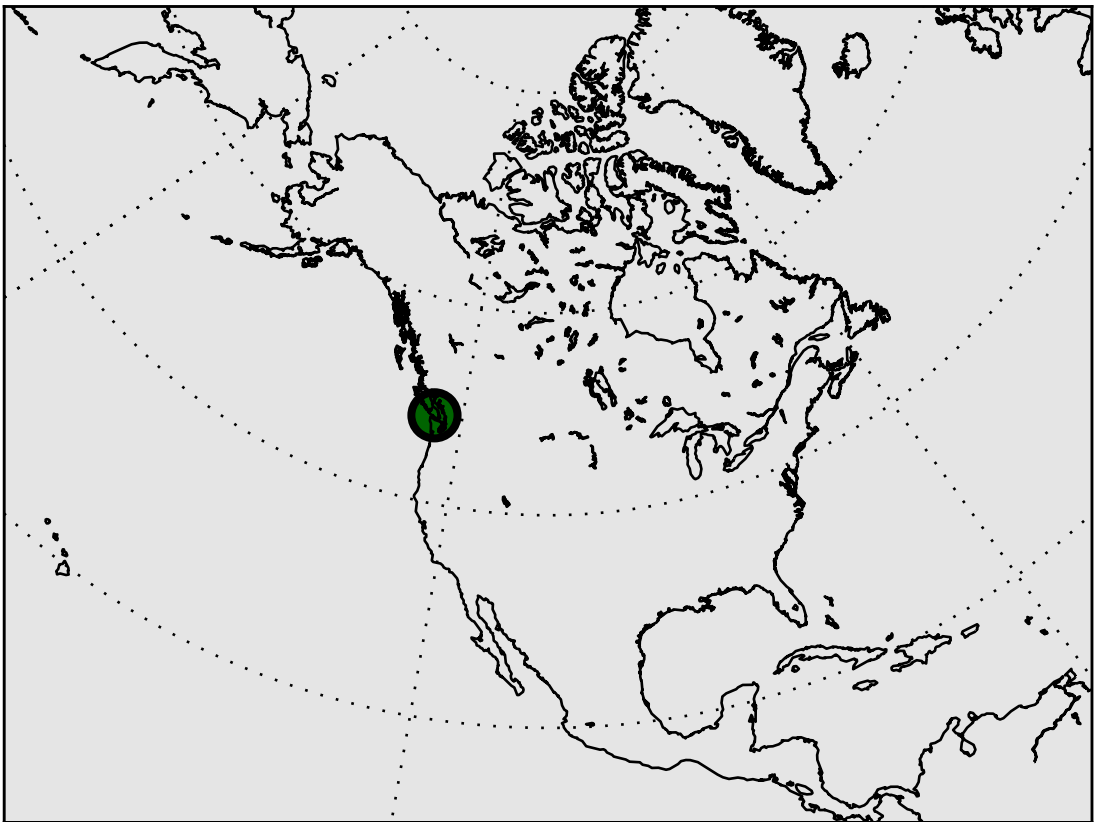

|                    |                                                       |
|--------------------|-------------------------------------------------------|
| Dataset name:      | Pixie.Brown.2002                                      |
| Archive type:      | LakeSediment                                          |
| Proxy type:        | pollen                                                |
| Variable name:     | temperature                                           |
| Latitude ( ° N):   | 48.6                                                  |
| Longitude ( ° E):  | -124.2                                                |
| Elevation (m):     | 70.0                                                  |
| Interp. variable:  | T                                                     |
| Interp. detail:    | air@surface                                           |
| Interp. season:    | winter+                                               |
| Interp. direction: | positive                                              |
| Pub. 1 title:      | Origin, development, and dynamics of coastal tempe... |
| Pub. 1 authors:    | Brown, K J; Hebda, R J                                |
| Pub. 1 year:       | 2002                                                  |
| Pub. 1 DOI:        | 10.1139/X01-197                                       |
| Original data URL: | www.ncdc.noaa.gov/paleo/study/27330                   |

Proxy data and metadata  
LakeSediment | pollen | Pixie.Brown.2002 | M2Leha3eu5bP

Proxy time series: temperature

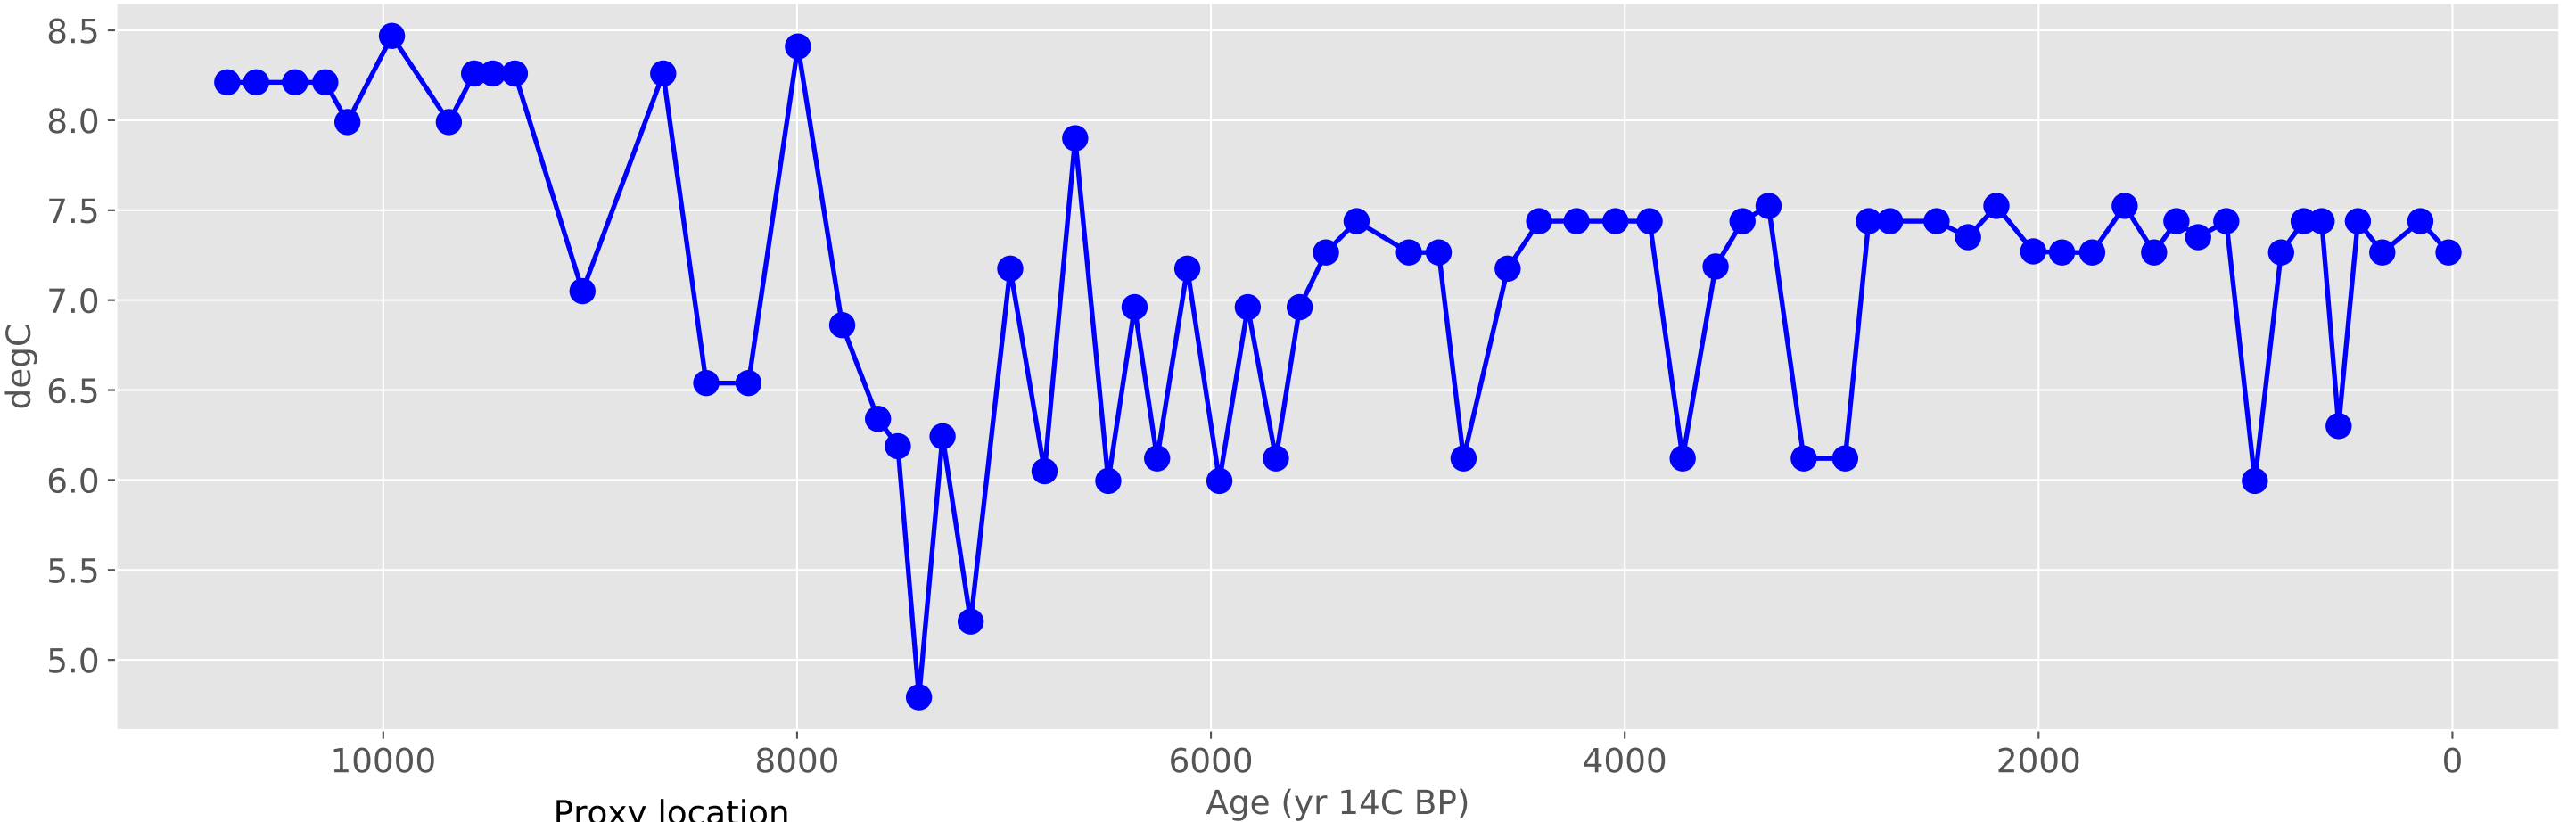

Proxy location  
(48.60 ° N, 124.20 ° W)

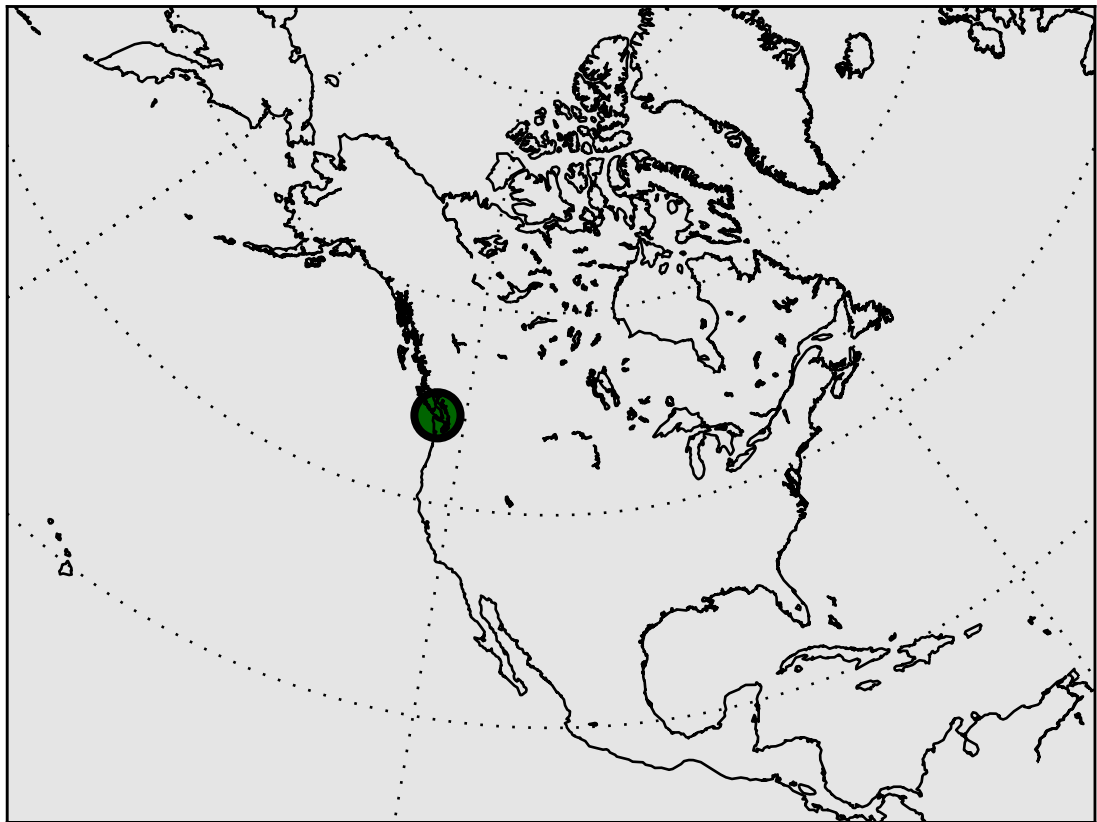

|                    |                                                                                              |
|--------------------|----------------------------------------------------------------------------------------------|
| Dataset name:      | Pixie.Brown.2002                                                                             |
| Archive type:      | LakeSediment                                                                                 |
| Proxy type:        | pollen                                                                                       |
| Variable name:     | temperature                                                                                  |
| Latitude ( ° N):   | 48.6                                                                                         |
| Longitude ( ° E):  | -124.2                                                                                       |
| Elevation (m):     | 70.0                                                                                         |
| Interp. variable:  | T                                                                                            |
| Interp. detail:    | air@surface                                                                                  |
| Interp. season:    | annual                                                                                       |
| Interp. direction: | positive                                                                                     |
| Pub. 1 title:      | Origin, development, and dynamics of coastal tempe...                                        |
| Pub. 1 authors:    | Brown, K J; Hebda, R J                                                                       |
| Pub. 1 year:       | 2002                                                                                         |
| Pub. 1 DOI:        | 10.1139/X01-197                                                                              |
| Original data URL: | <a href="http://www.ncdc.noaa.gov/paleo/study/27330">www.ncdc.noaa.gov/paleo/study/27330</a> |

Proxy data and metadata  
LakeSediment | pollen | Pixie.Brown.2002 | M2Lqezod5l2P

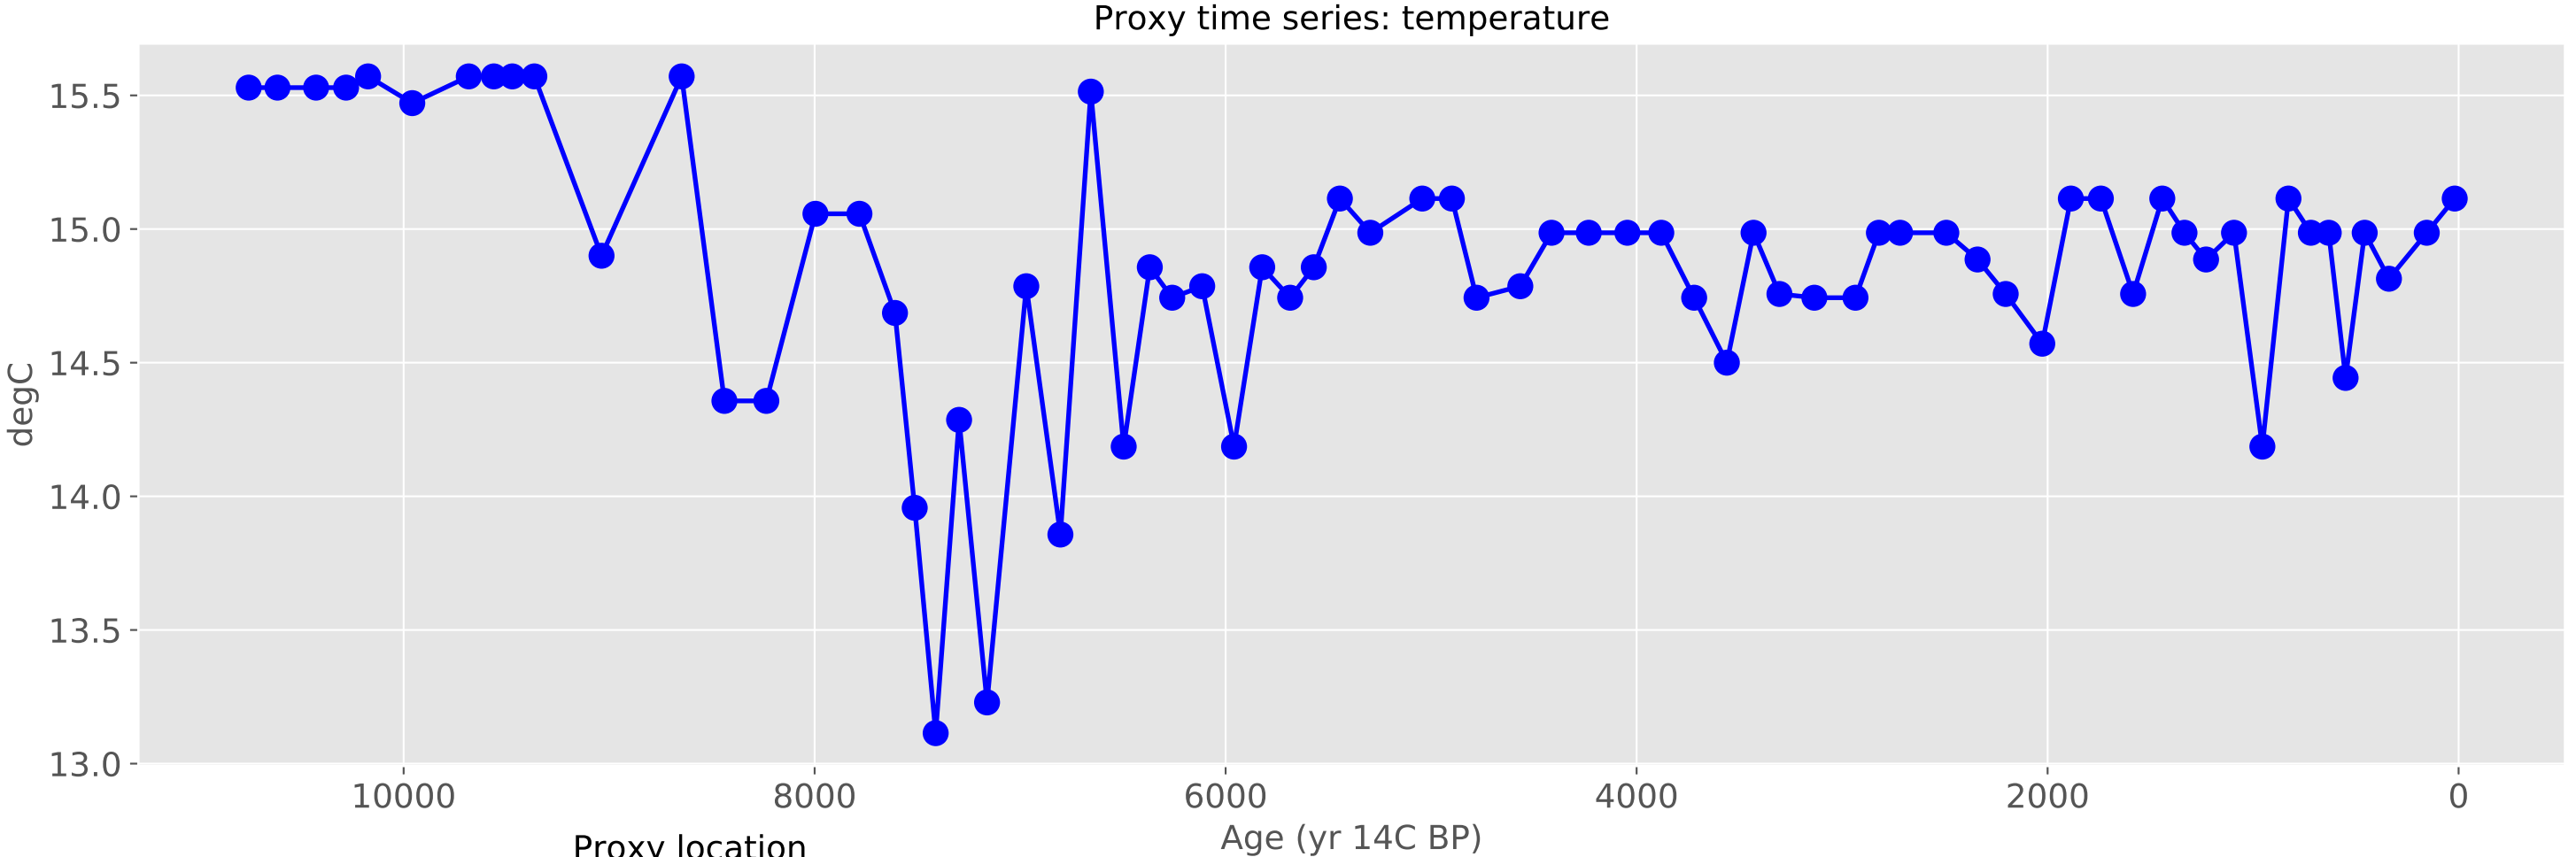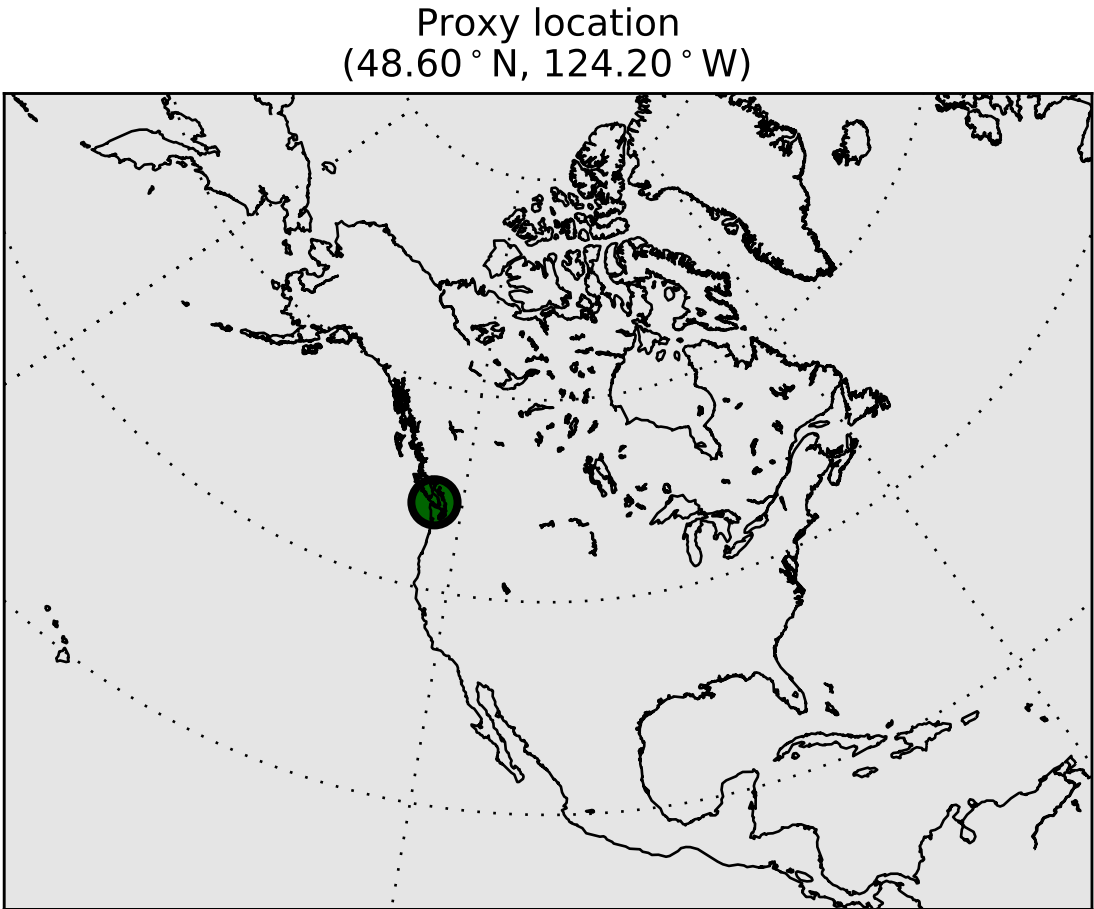

|                    |                                                       |
|--------------------|-------------------------------------------------------|
| Dataset name:      | Pixie.Brown.2002                                      |
| Archive type:      | LakeSediment                                          |
| Proxy type:        | pollen                                                |
| Variable name:     | temperature                                           |
| Latitude ( ° N):   | 48.6                                                  |
| Longitude ( ° E):  | -124.2                                                |
| Elevation (m):     | 70.0                                                  |
| Interp. variable:  | T                                                     |
| Interp. detail:    | air@surface                                           |
| Interp. season:    | summer+                                               |
| Interp. direction: | positive                                              |
| Pub. 1 title:      | Origin, development, and dynamics of coastal tempe... |
| Pub. 1 authors:    | Brown, K J; Hebda, R J                                |
| Pub. 1 year:       | 2002                                                  |
| Pub. 1 DOI:        | 10.1139/X01-197                                       |
| Original data URL: | www.ncdc.noaa.gov/paleo/study/27330                   |

Proxy data and metadata  
LakeSediment | pollen | PixieLake.Brown.2006 | WEB69d58fa4

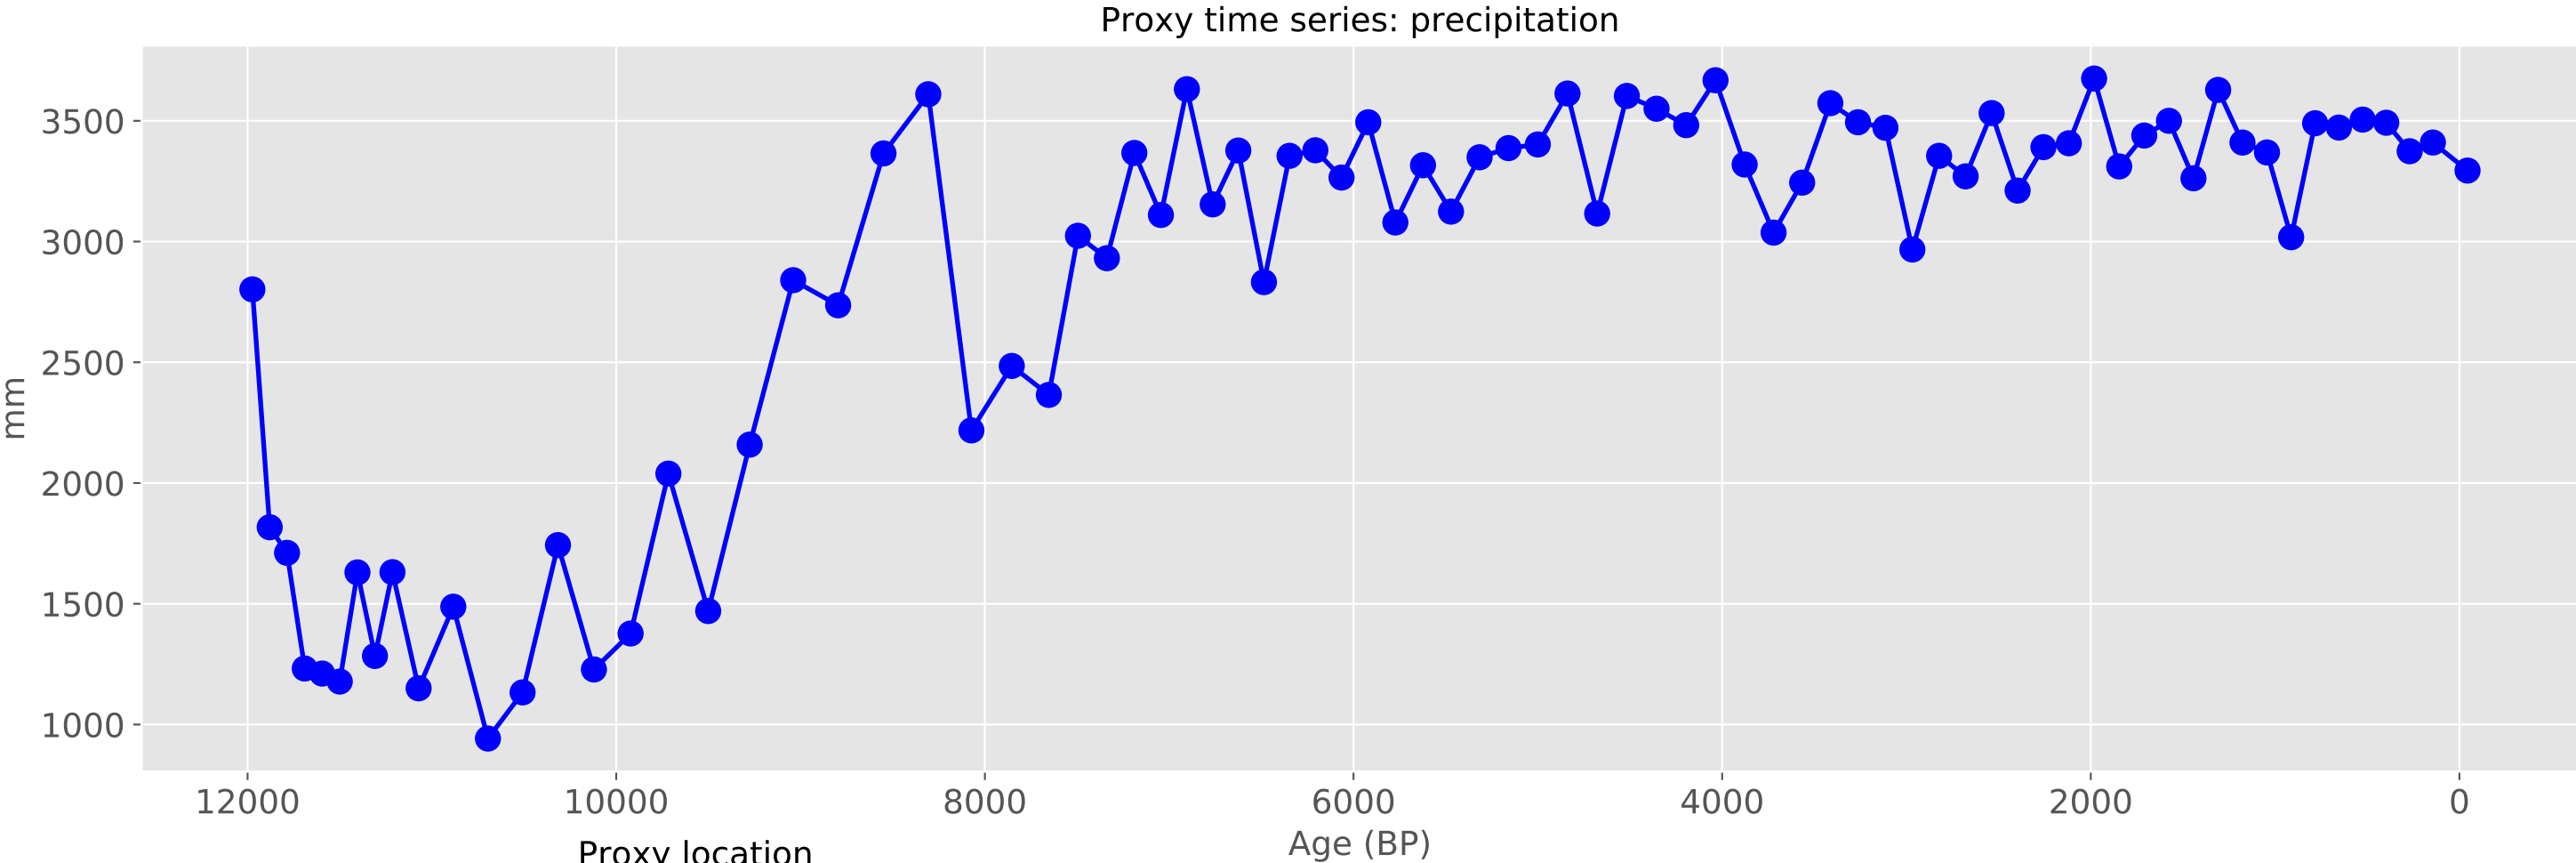

Proxy location  
(48.60 ° N, 124.20 ° W)



|                    |                                                       |
|--------------------|-------------------------------------------------------|
| Dataset name:      | PixieLake.Brown.2006                                  |
| Archive type:      | LakeSediment                                          |
| Proxy type:        | pollen                                                |
| Variable name:     | precipitation                                         |
| Latitude ( ° N):   | 48.6                                                  |
| Longitude ( ° E):  | -124.2                                                |
| Elevation (m):     | 67.0                                                  |
| Interp. variable:  | P                                                     |
| Interp. detail:    | amount@surface                                        |
| Interp. season:    | annual                                                |
| Interp. direction: | positive                                              |
| Pub. 1 title:      | Holocene precipitation in the coastal temperate ra... |
| Pub. 1 authors:    | Brown, K.J.;Fitton, R.J.;Schoups, G.;Allen, G.B.;W... |
| Pub. 1 year:       | 2006                                                  |
| Pub. 1 DOI:        | 10.1016/j.quascirev.2006.02.020                       |
| Original data URL: | wNAm                                                  |

Proxy data and metadata  
LakeSediment | pollen | Carp.Whitlock.1985 | M2Lpkk1erutP

Proxy time series: temperature

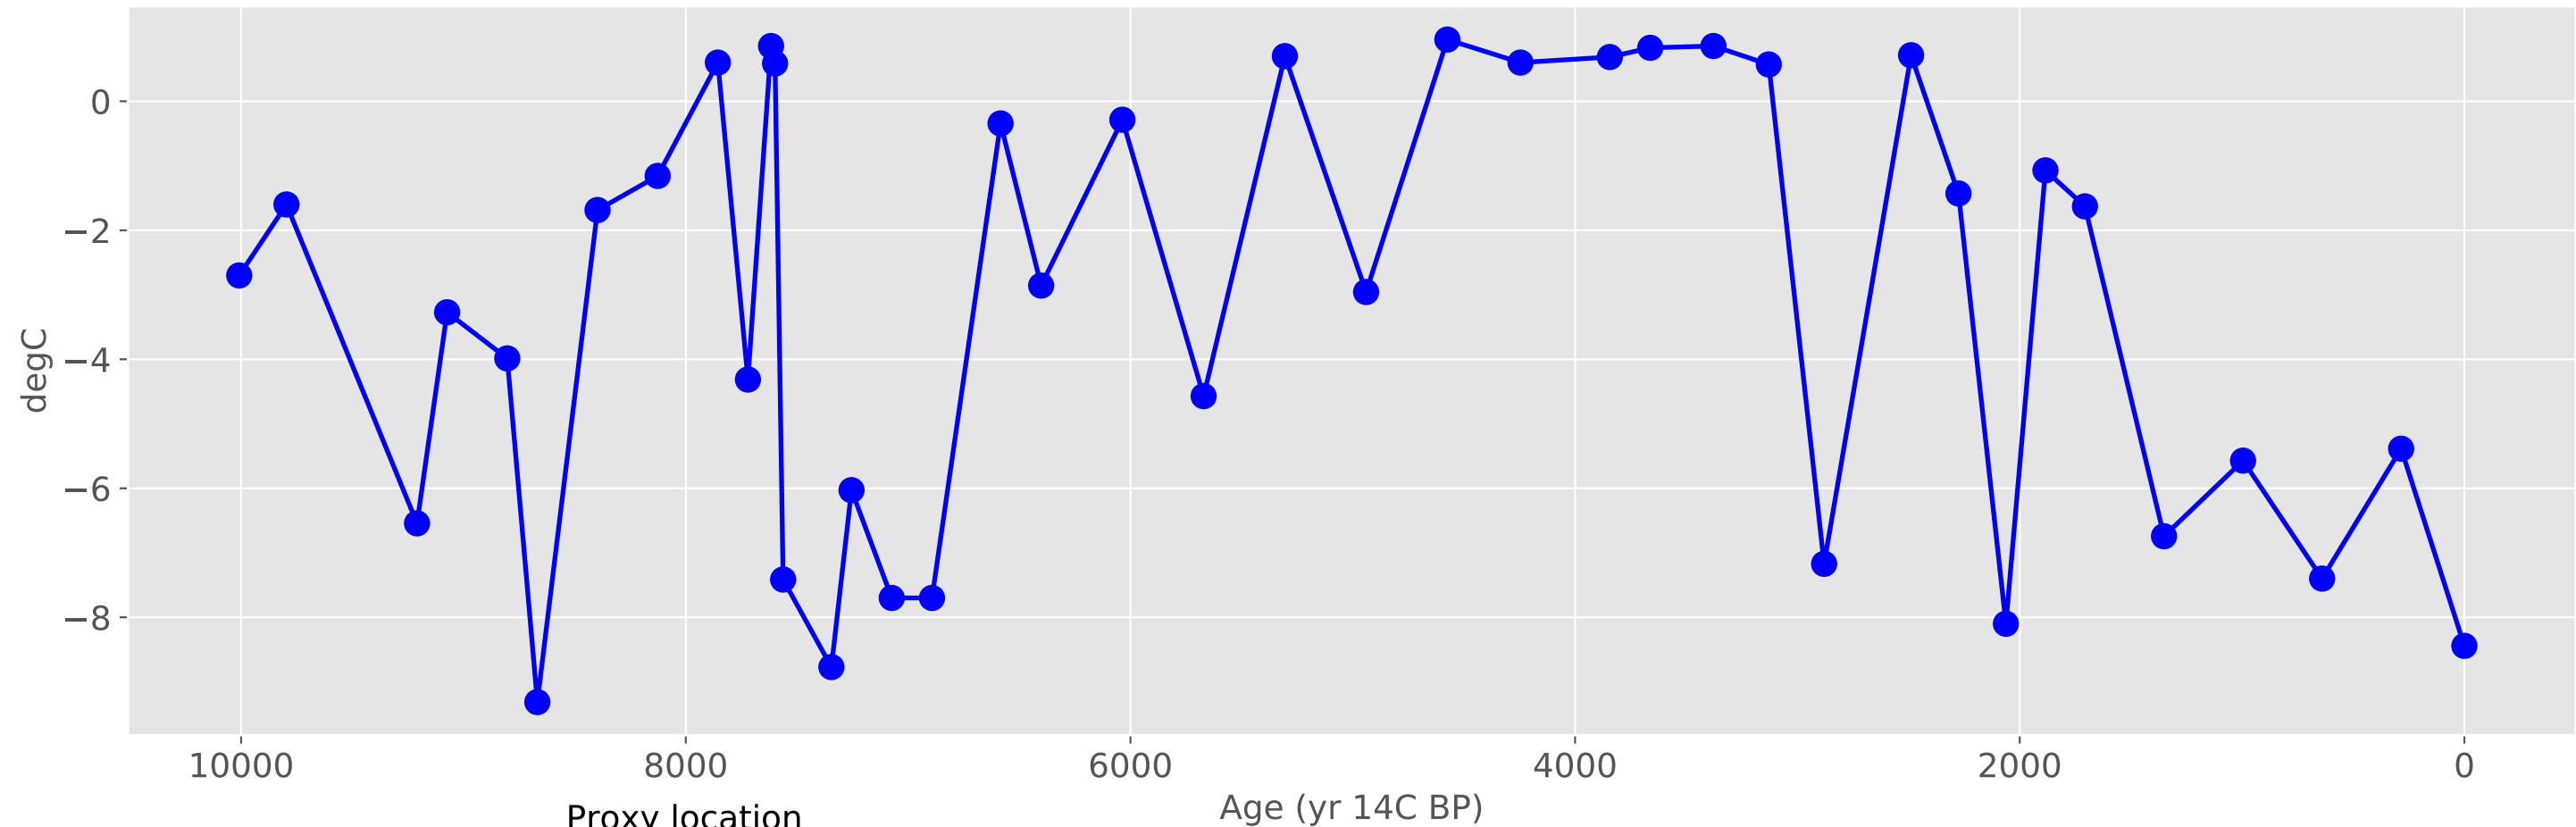

Proxy location  
(45.92 ° N, 120.88 ° W)

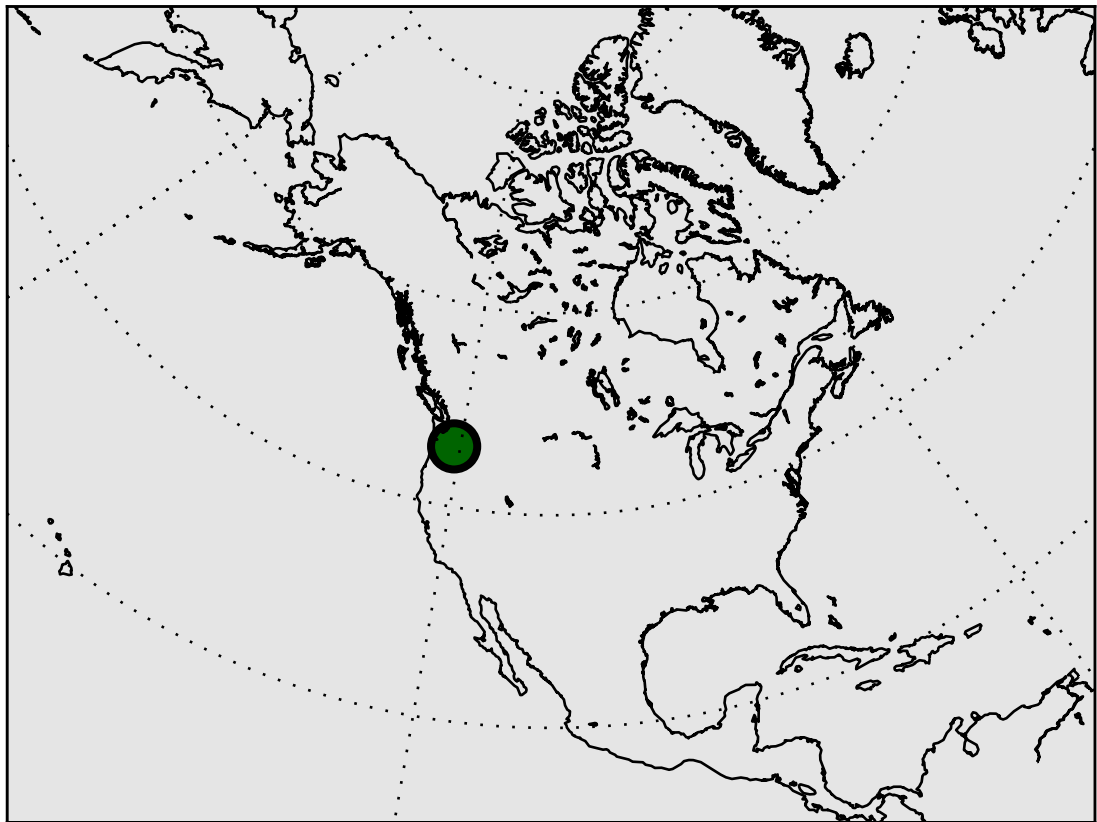

|                    |                                                                                              |
|--------------------|----------------------------------------------------------------------------------------------|
| Dataset name:      | Carp.Whitlock.1985                                                                           |
| Archive type:      | LakeSediment                                                                                 |
| Proxy type:        | pollen                                                                                       |
| Variable name:     | temperature                                                                                  |
| Latitude ( ° N):   | 45.92                                                                                        |
| Longitude ( ° E):  | -120.88                                                                                      |
| Elevation (m):     | 714.0                                                                                        |
| Interp. variable:  | T                                                                                            |
| Interp. detail:    | air@surface                                                                                  |
| Interp. season:    | winter+                                                                                      |
| Interp. direction: | positive                                                                                     |
| Pub. 1 title:      | Late Quaternary vegetation in the southwestern Col...                                        |
| Pub. 1 authors:    | Barnosky, Cathy W.                                                                           |
| Pub. 1 year:       | 1985                                                                                         |
| Pub. 1 DOI:        | 10.1016/0033-5894(85)90075-4                                                                 |
| Original data URL: | <a href="http://www.ncdc.noaa.gov/paleo/study/27330">www.ncdc.noaa.gov/paleo/study/27330</a> |

Proxy data and metadata  
LakeSediment | pollen | Carp.Whitlock.1985 | M2Lseyl59f9P

Proxy time series: temperature

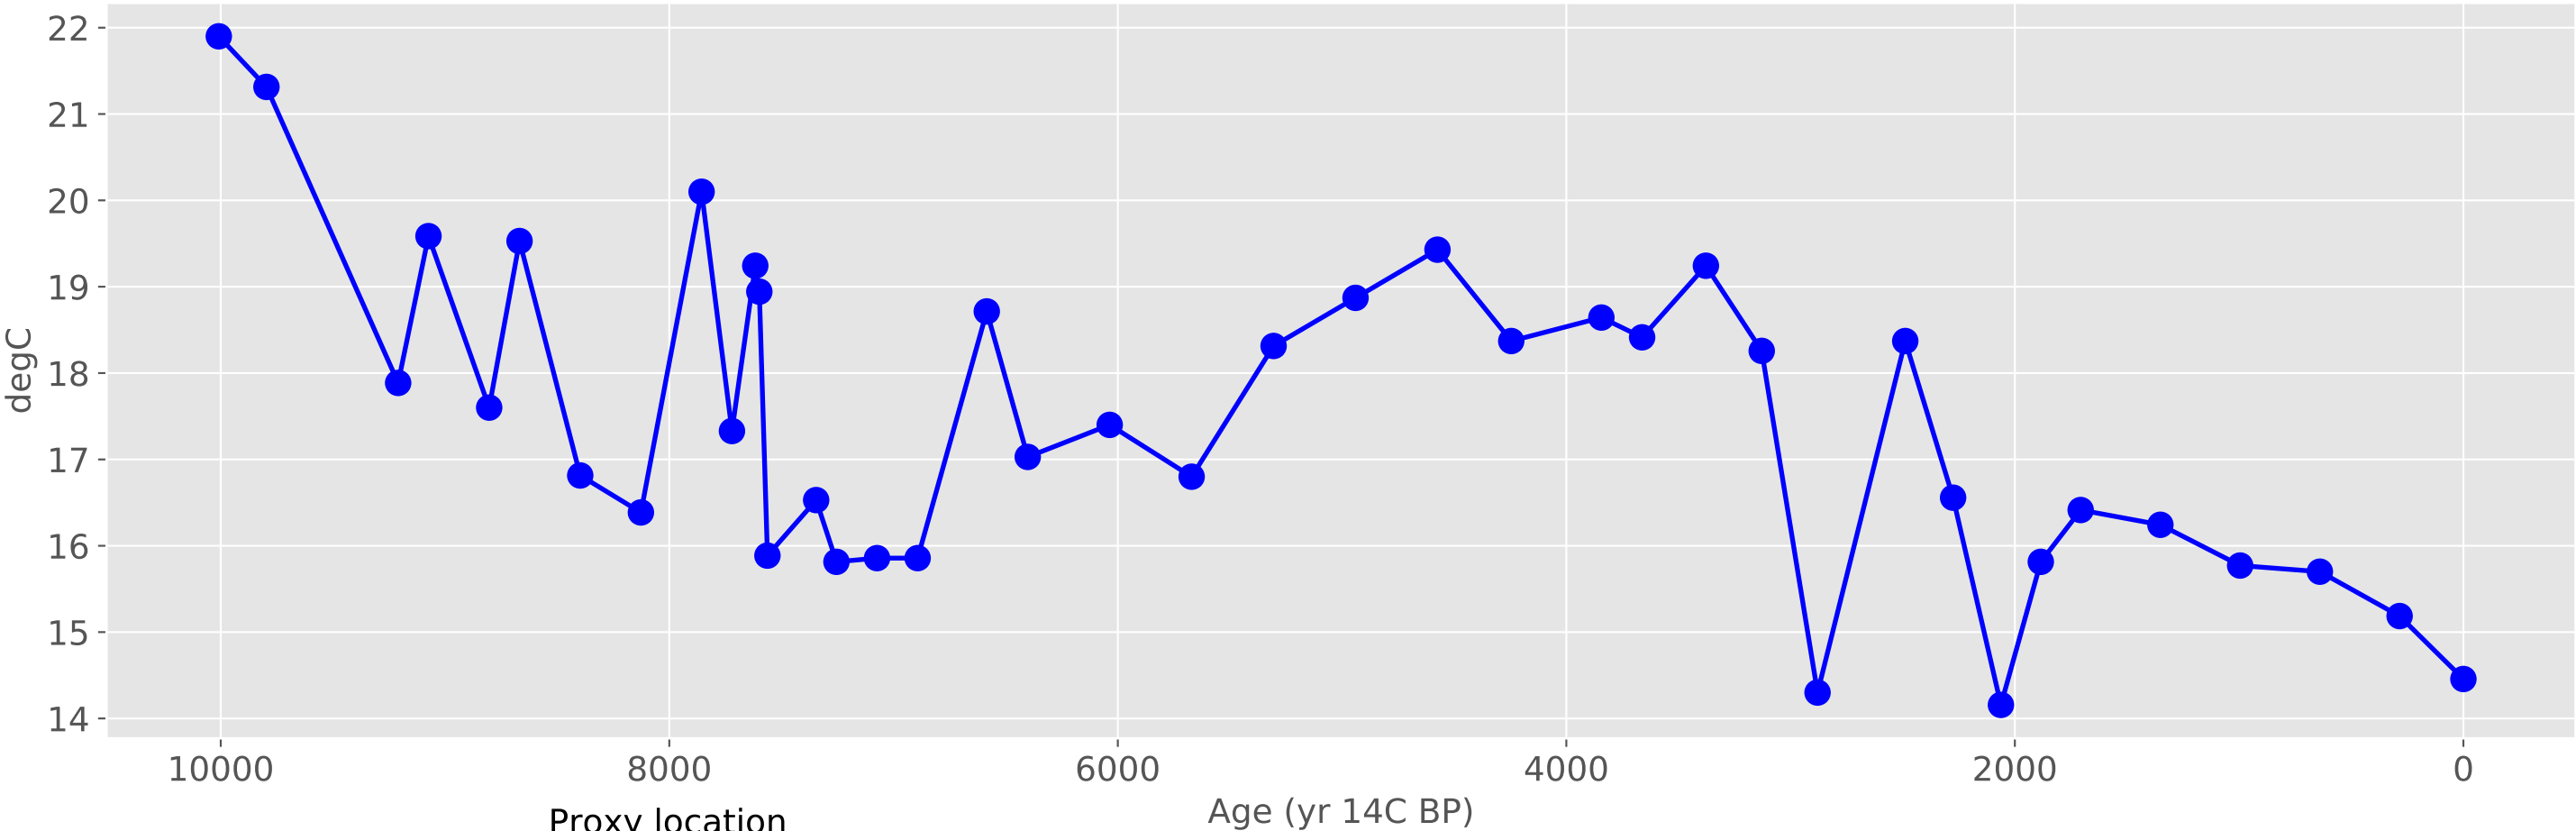

Proxy location  
(45.92 ° N, 120.88 ° W)



|                    |                                                       |
|--------------------|-------------------------------------------------------|
| Dataset name:      | Carp.Whitlock.1985                                    |
| Archive type:      | LakeSediment                                          |
| Proxy type:        | pollen                                                |
| Variable name:     | temperature                                           |
| Latitude ( ° N):   | 45.92                                                 |
| Longitude ( ° E):  | -120.88                                               |
| Elevation (m):     | 714.0                                                 |
| Interp. variable:  | T                                                     |
| Interp. detail:    | air@surface                                           |
| Interp. season:    | summer+                                               |
| Interp. direction: | positive                                              |
| Pub. 1 title:      | Late Quaternary vegetation in the southwestern Col... |
| Pub. 1 authors:    | Barnosky, Cathy W.                                    |
| Pub. 1 year:       | 1985                                                  |
| Pub. 1 DOI:        | 10.1016/0033-5894(85)90075-4                          |
| Original data URL: | www.ncdc.noaa.gov/paleo/study/27330                   |



Proxy data and metadata  
LakeSediment | pollen | Carp.Whitlock.1985 | M2Lslc7g79tP

Proxy time series: precipitation

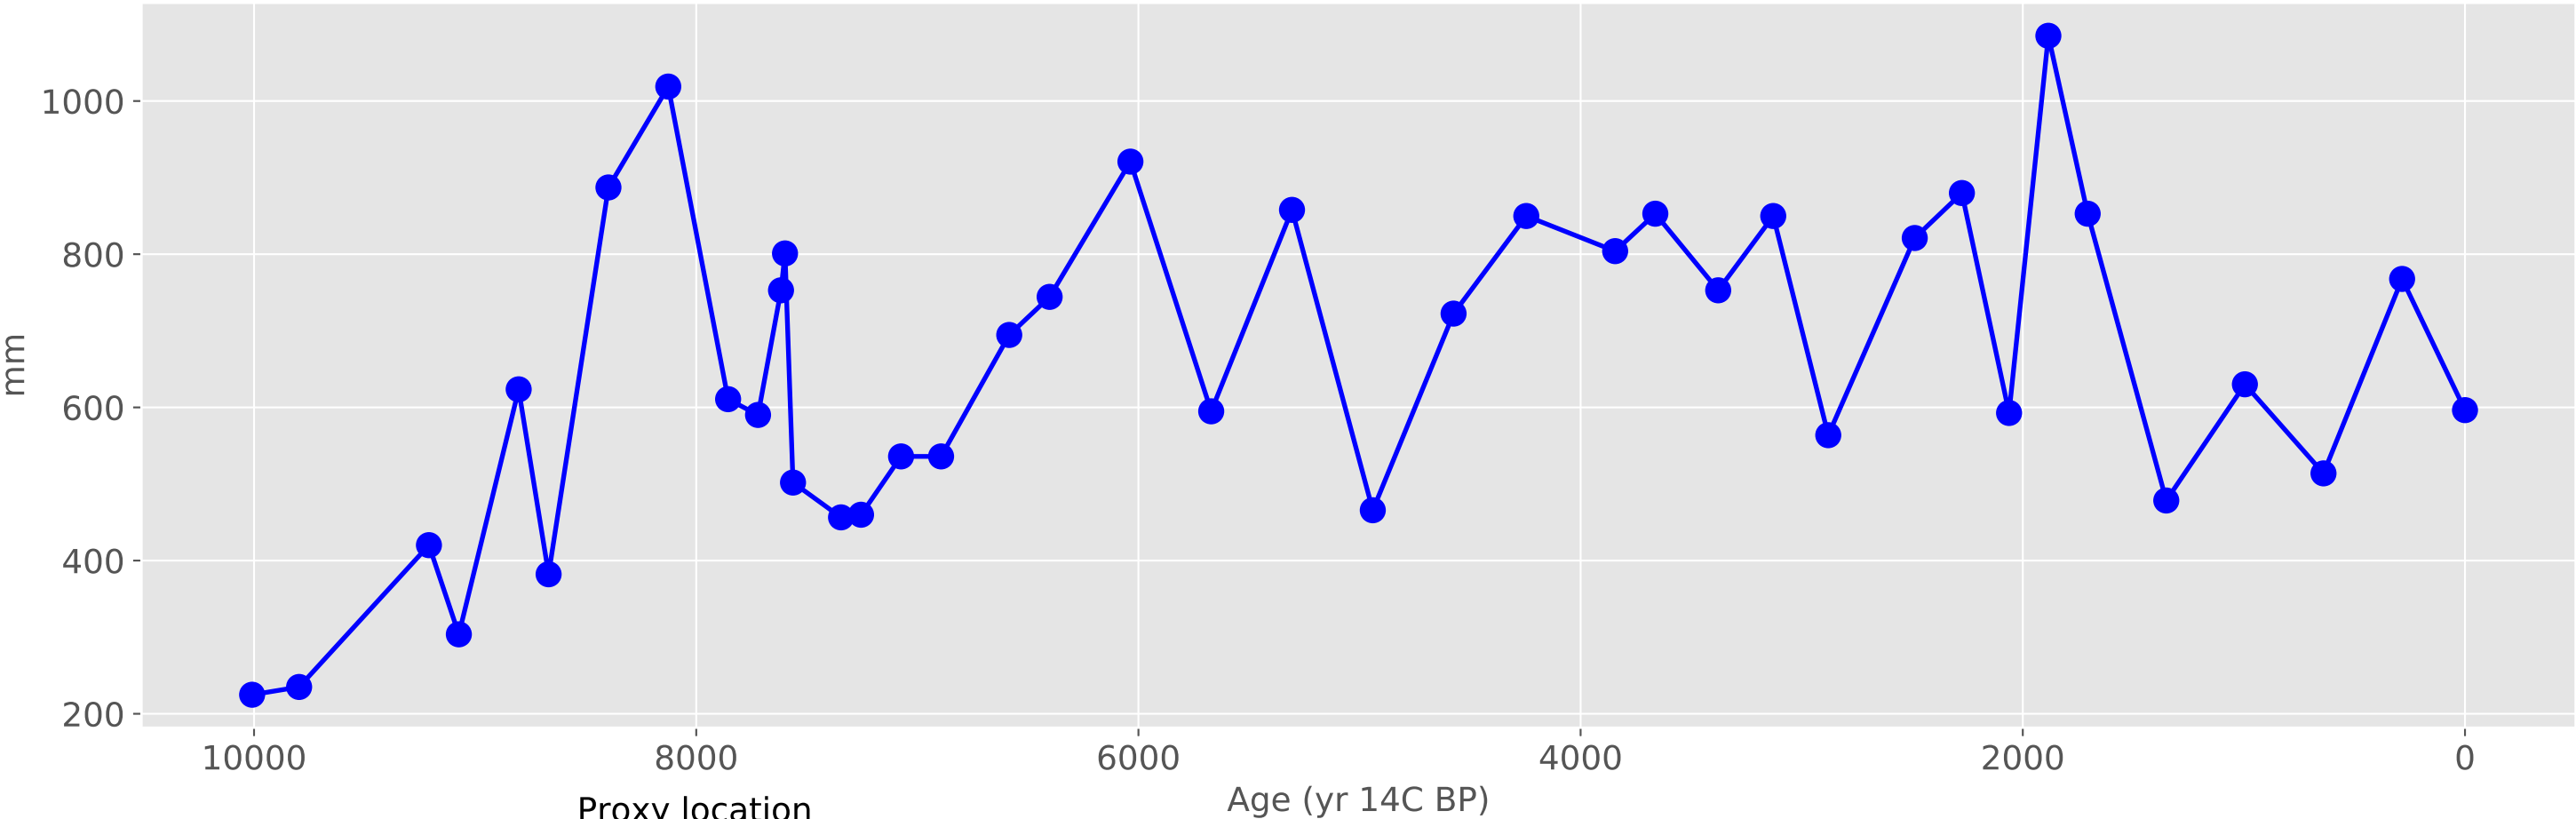

Proxy location  
(45.92 ° N, 120.88 ° W)



|                    |                                                       |
|--------------------|-------------------------------------------------------|
| Dataset name:      | Carp.Whitlock.1985                                    |
| Archive type:      | LakeSediment                                          |
| Proxy type:        | pollen                                                |
| Variable name:     | precipitation                                         |
| Latitude ( ° N):   | 45.92                                                 |
| Longitude ( ° E):  | -120.88                                               |
| Elevation (m):     | 714.0                                                 |
| Interp. variable:  | P                                                     |
| Interp. detail:    | amount@surface                                        |
| Interp. season:    | annual                                                |
| Interp. direction: | positive                                              |
| Pub. 1 title:      | Late Quaternary vegetation in the southwestern Col... |
| Pub. 1 authors:    | Barnosky, Cathy W.                                    |
| Pub. 1 year:       | 1985                                                  |
| Pub. 1 DOI:        | 10.1016/0033-5894(85)90075-4                          |
| Original data URL: | www.ncdc.noaa.gov/paleo/study/27330                   |

Proxy data and metadata  
LakeSediment | pollen | Carp.Whitlock.1985 | M2Lyvstpj8pP

Proxy time series: temperature

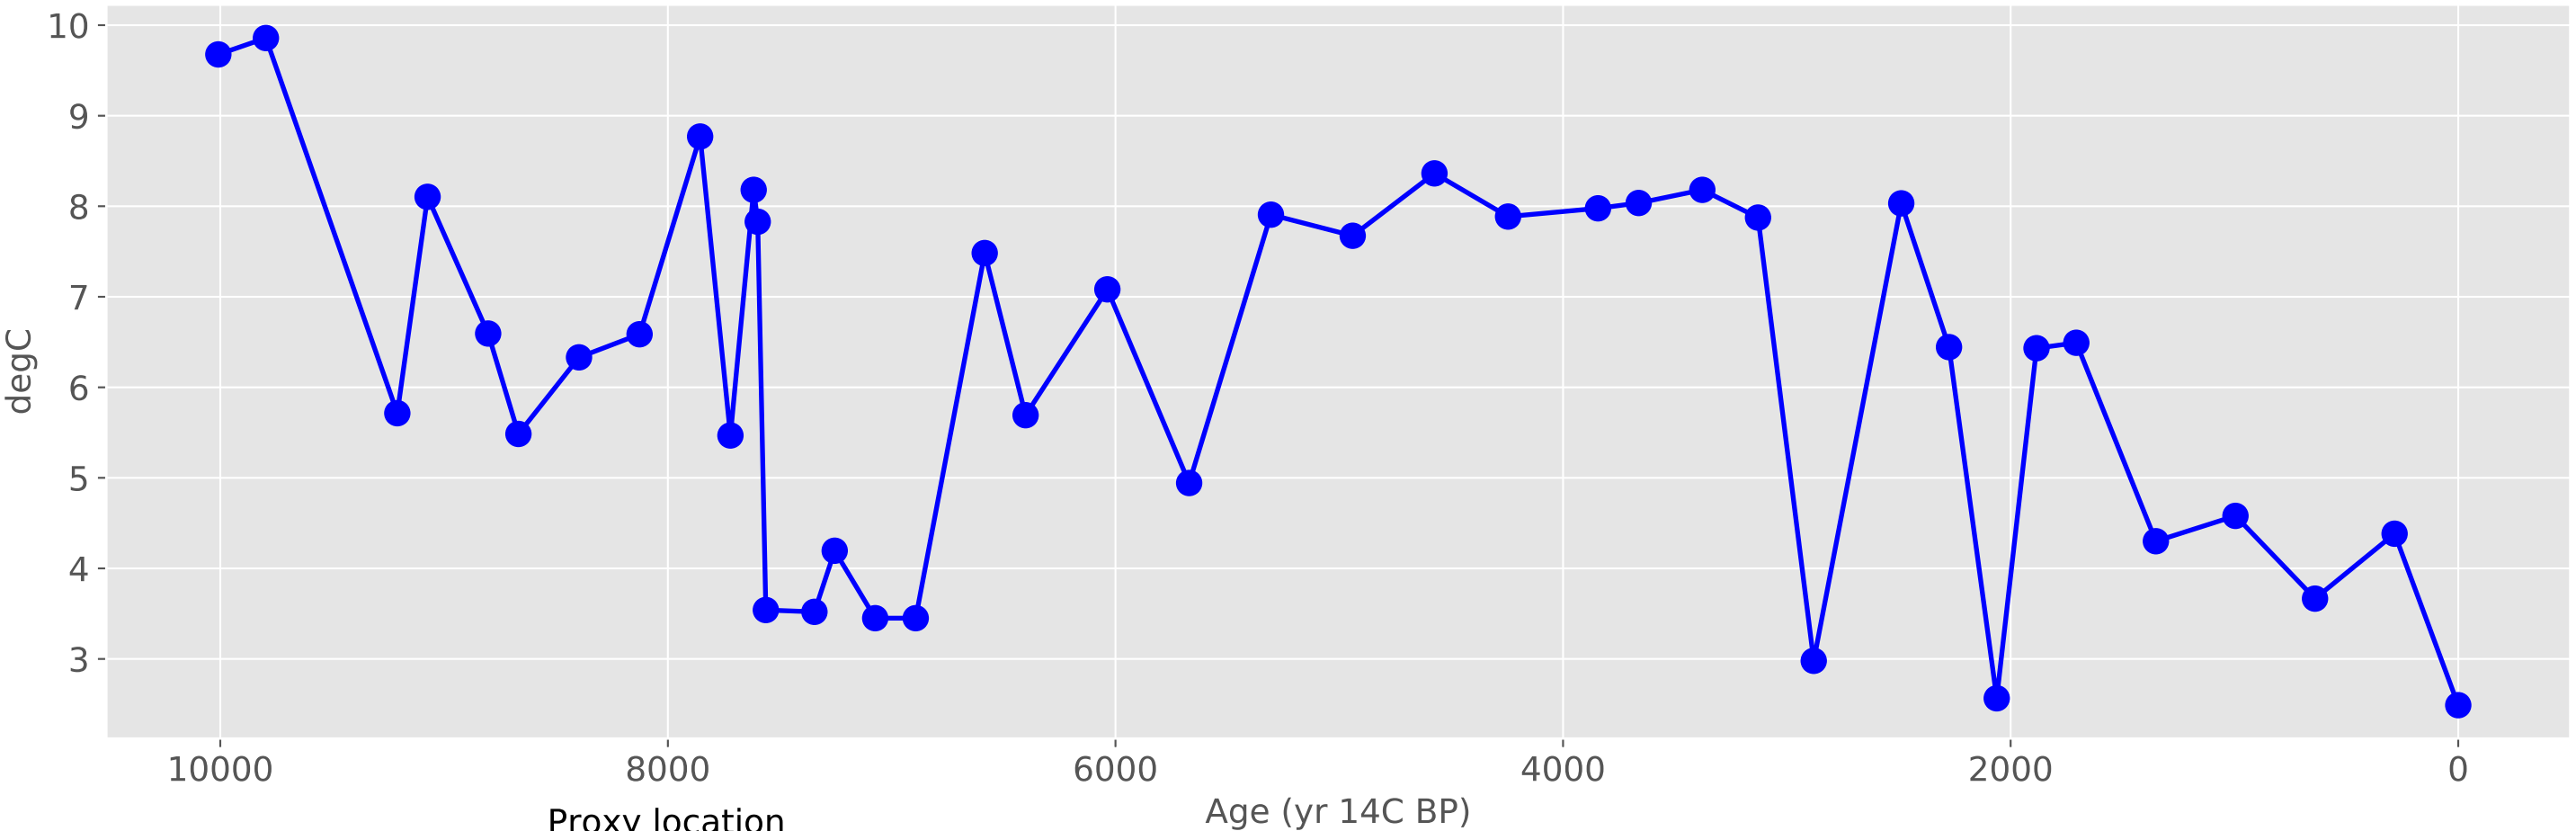

Proxy location  
(45.92 ° N, 120.88 ° W)



|                    |                                                       |
|--------------------|-------------------------------------------------------|
| Dataset name:      | Carp.Whitlock.1985                                    |
| Archive type:      | LakeSediment                                          |
| Proxy type:        | pollen                                                |
| Variable name:     | temperature                                           |
| Latitude ( ° N):   | 45.92                                                 |
| Longitude ( ° E):  | -120.88                                               |
| Elevation (m):     | 714.0                                                 |
| Interp. variable:  | T                                                     |
| Interp. detail:    | air@surface                                           |
| Interp. season:    | annual                                                |
| Interp. direction: | positive                                              |
| Pub. 1 title:      | Late Quaternary vegetation in the southwestern Col... |
| Pub. 1 authors:    | Barnosky, Cathy W.                                    |
| Pub. 1 year:       | 1985                                                  |
| Pub. 1 DOI:        | 10.1016/0033-5894(85)90075-4                          |
| Original data URL: | www.ncdc.noaa.gov/paleo/study/27330                   |

Proxy data and metadata  
LakeSediment | pollen | BattleGround.Whitlock.1985 | M2Llyjrd1pfP

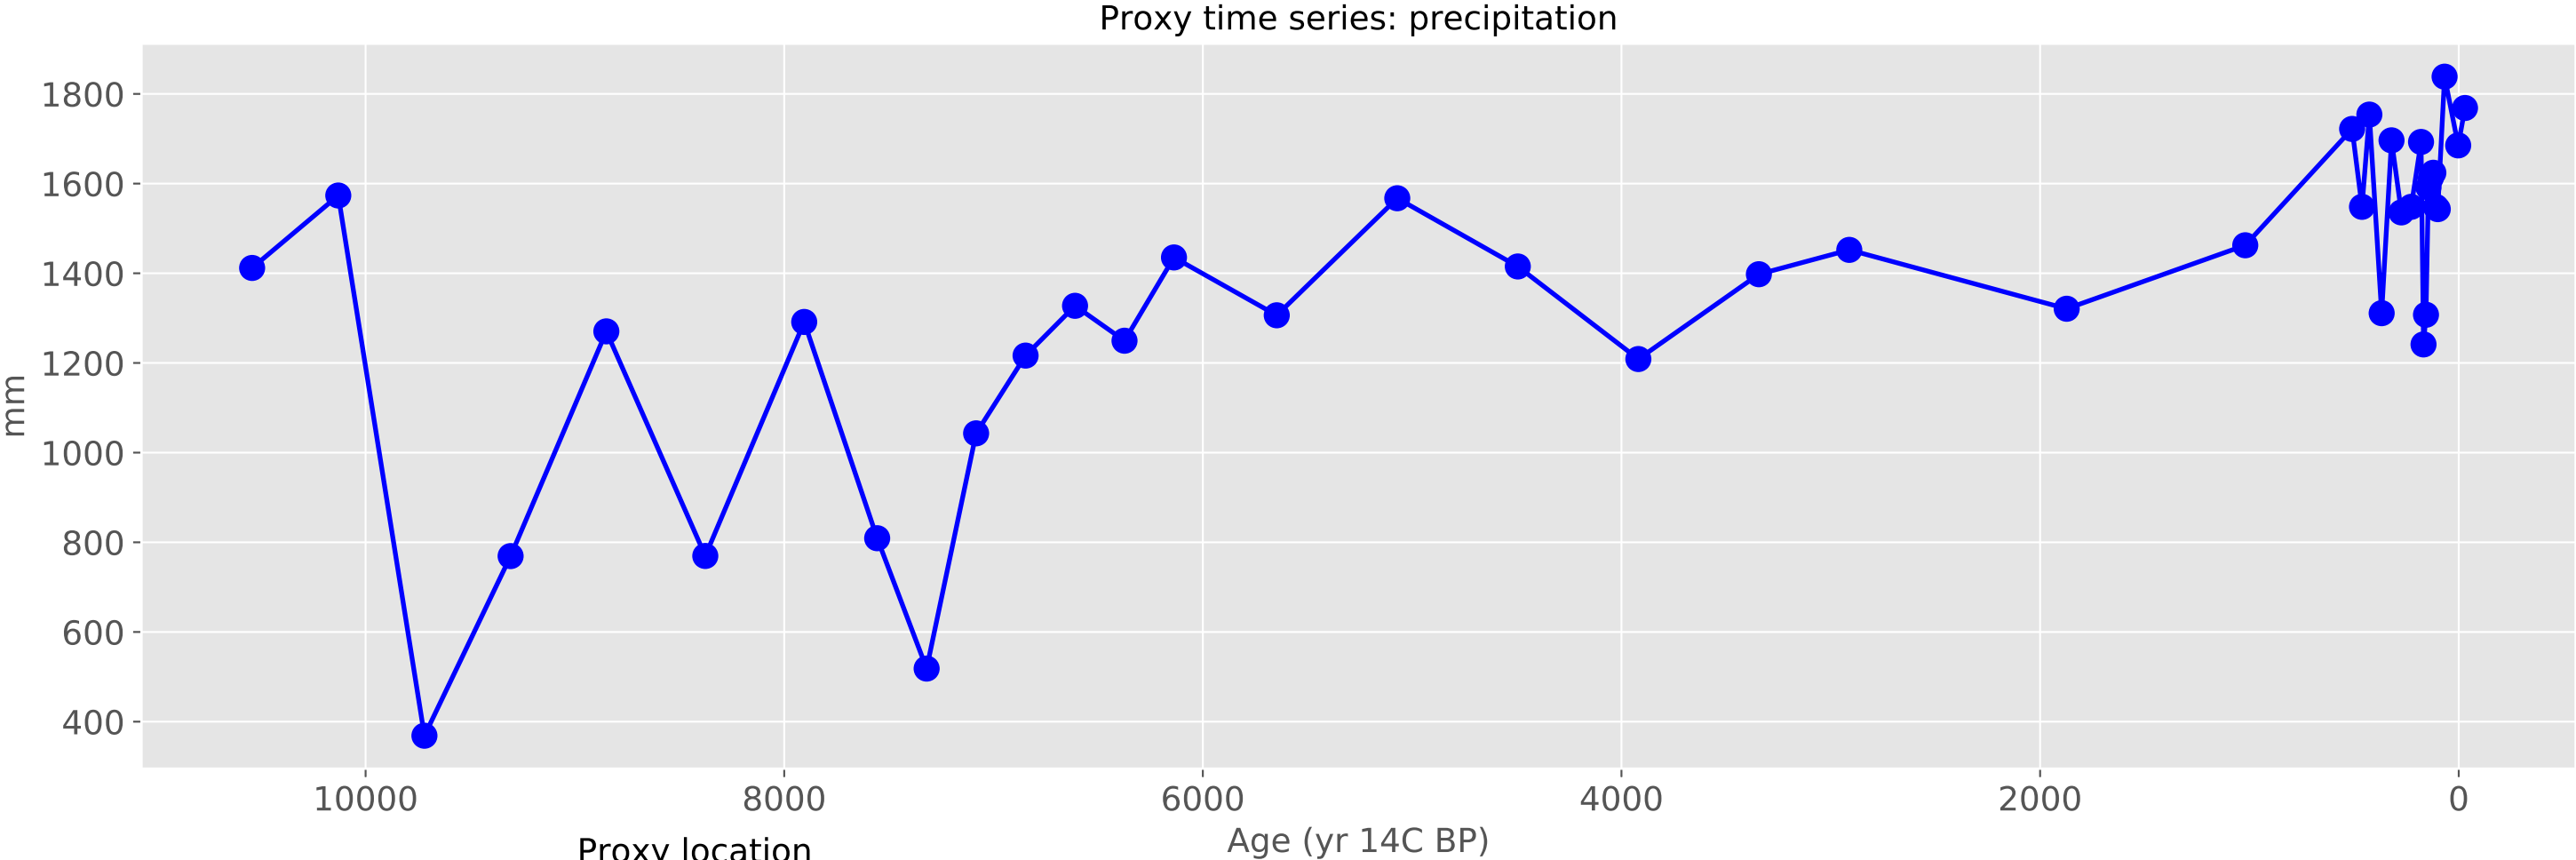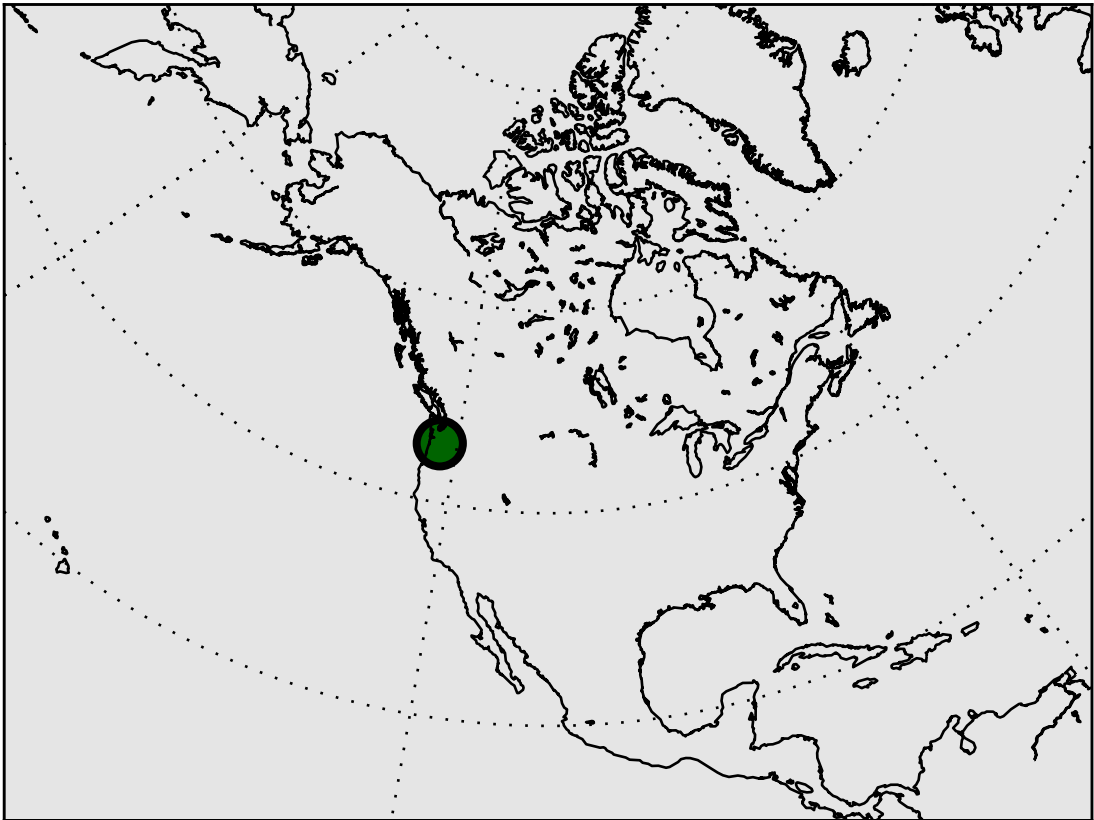

|                    |                                                       |
|--------------------|-------------------------------------------------------|
| Dataset name:      | BattleGround.Whitlock.1985                            |
| Archive type:      | LakeSediment                                          |
| Proxy type:        | pollen                                                |
| Variable name:     | precipitation                                         |
| Latitude ( ° N):   | 45.8                                                  |
| Longitude ( ° E):  | -122.4917                                             |
| Elevation (m):     | 155.0                                                 |
| Interp. variable:  | P                                                     |
| Interp. detail:    | amount@surface                                        |
| Interp. season:    | annual                                                |
| Interp. direction: | positive                                              |
| Pub. 1 title:      | Late Quaternary vegetation near Battle Ground Lake... |
| Pub. 1 authors:    | Barnosky, C. W.                                       |
| Pub. 1 year:       | 1985                                                  |
| Pub. 1 DOI:        | 10.1130/0016-7606(1985)96<263:LQVNBG>2.0.CO;2         |
| Original data URL: | www.ncdc.noaa.gov/paleo/study/27330                   |

Proxy data and metadata

LakeSediment | pollen | BattleGround.Whitlock.1985 | M2Lnb4vidkmP

Proxy time series: temperature

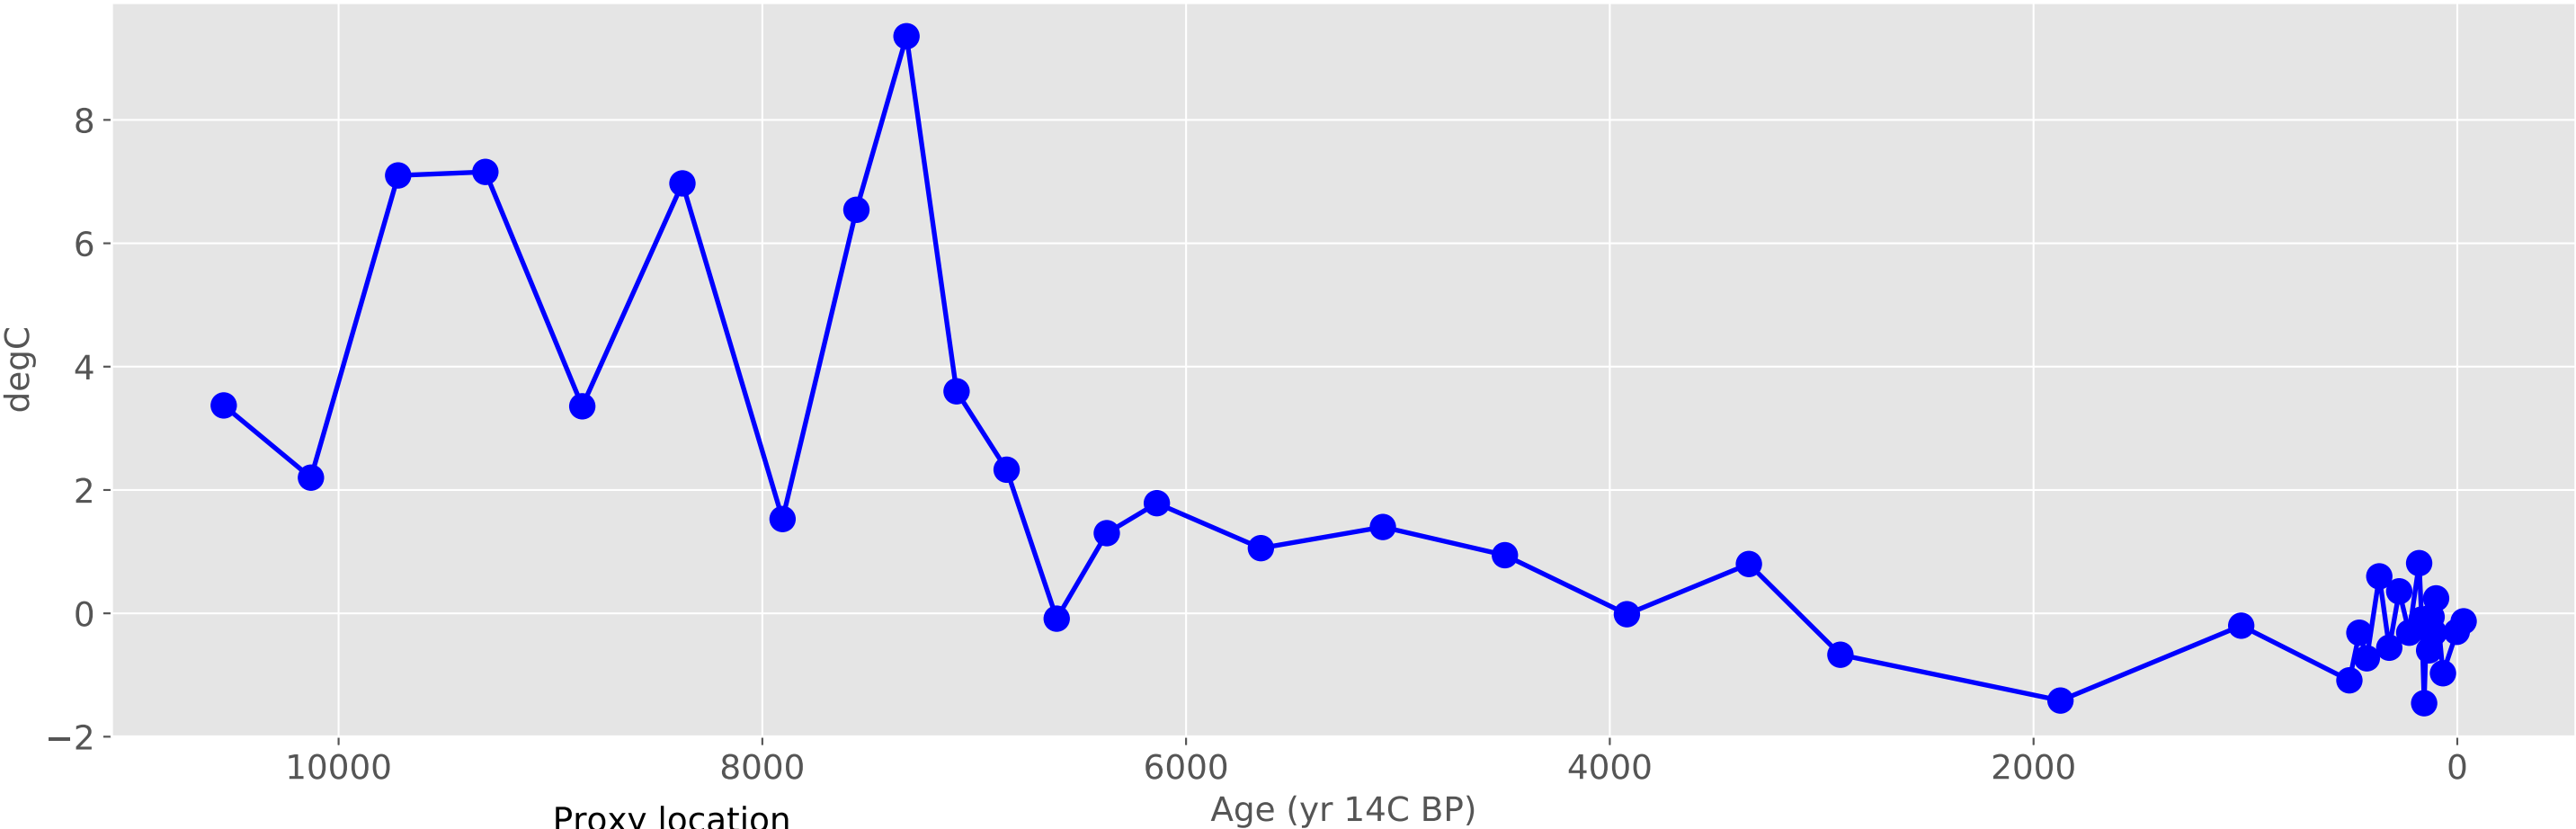

Proxy location  
(45.80 ° N, 122.49 ° W)

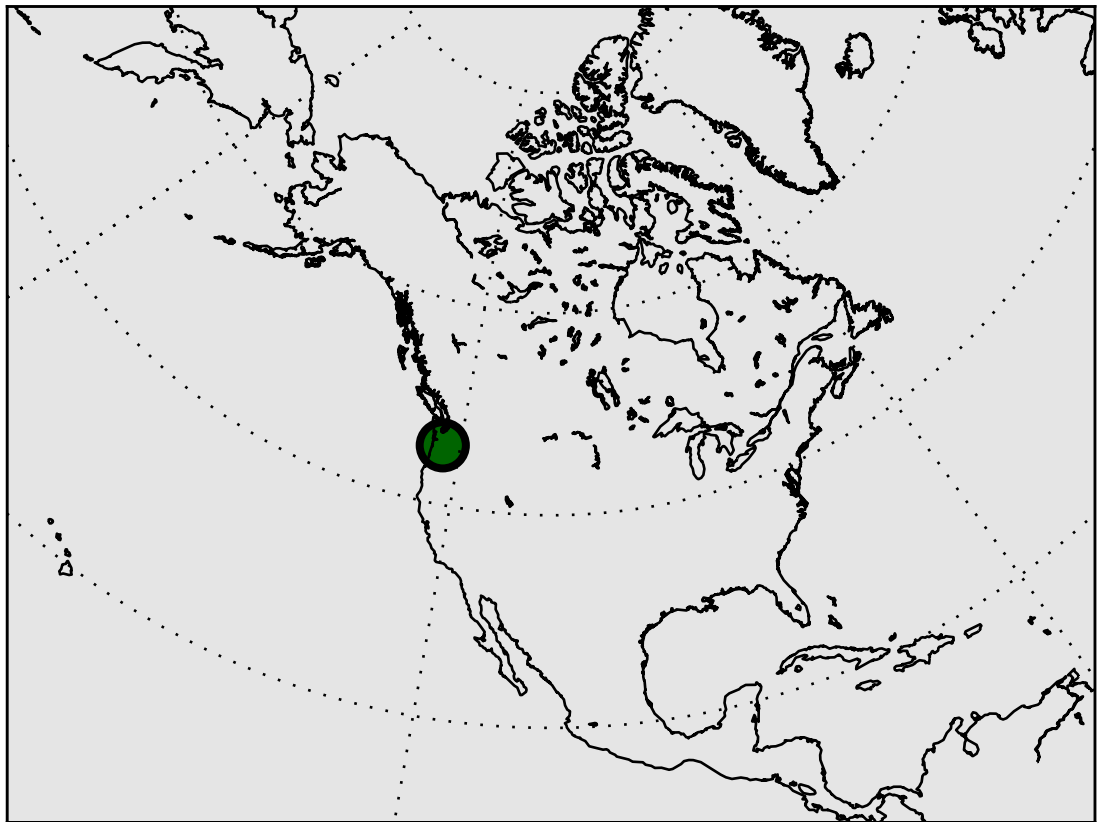

Dataset name: BattleGround.Whitlock.1985  
Archive type: LakeSediment  
Proxy type: pollen  
Variable name: temperature  
Latitude ( ° N): 45.8  
Longitude ( ° E): -122.4917  
Elevation (m): 155.0  
Interp. variable: T  
Interp. detail: air@surface  
Interp. season: winter+  
Interp. direction: positive  
Pub. 1 title: Late Quaternary vegetation near Battle Ground Lake...  
Pub. 1 authors: Barnosky, C. W.  
Pub. 1 year: 1985  
Pub. 1 DOI: 10.1130/0016-7606(1985)96<263:LQVNBG>2.0.CO;2  
Original data URL: [www.ncdc.noaa.gov/paleo/study/27330](http://www.ncdc.noaa.gov/paleo/study/27330)

Proxy data and metadata  
LakeSediment | pollen | BattleGround.Whitlock.1985 | M2Lx72gur5IP

Proxy time series: temperature

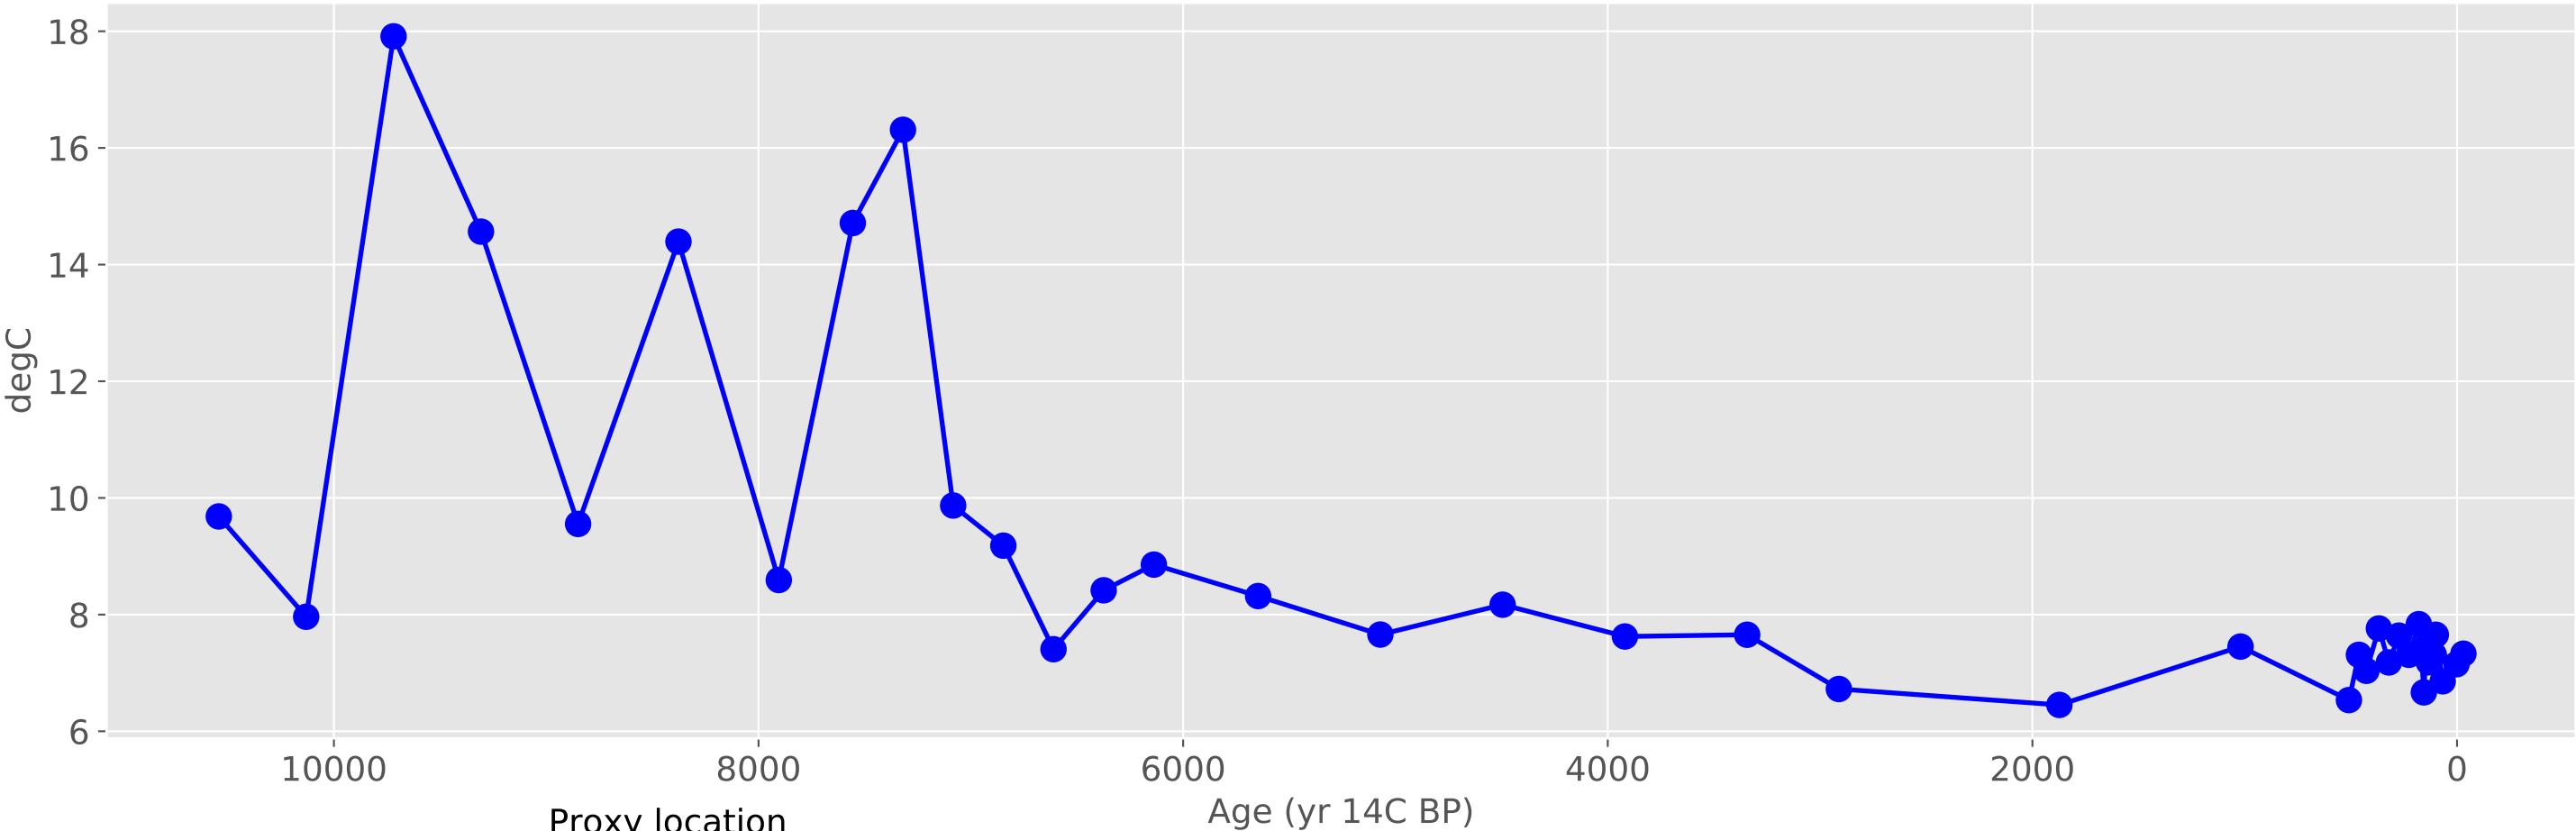

Proxy location  
(45.80 ° N, 122.49 ° W)



|                    |                                                       |
|--------------------|-------------------------------------------------------|
| Dataset name:      | BattleGround.Whitlock.1985                            |
| Archive type:      | LakeSediment                                          |
| Proxy type:        | pollen                                                |
| Variable name:     | temperature                                           |
| Latitude ( ° N):   | 45.8                                                  |
| Longitude ( ° E):  | -122.4917                                             |
| Elevation (m):     | 155.0                                                 |
| Interp. variable:  | T                                                     |
| Interp. detail:    | air@surface                                           |
| Interp. season:    | annual                                                |
| Interp. direction: | positive                                              |
| Pub. 1 title:      | Late Quaternary vegetation near Battle Ground Lake... |
| Pub. 1 authors:    | Barnosky, C. W.                                       |
| Pub. 1 year:       | 1985                                                  |
| Pub. 1 DOI:        | 10.1130/0016-7606(1985)96<263:LQVNBG>2.0.CO;2         |
| Original data URL: | www.ncdc.noaa.gov/paleo/study/27330                   |

Proxy data and metadata  
**LakeSediment | pollen | BattleGround.Whitlock.1985 | M2Lxyvz743zP**

Proxy time series: temperature

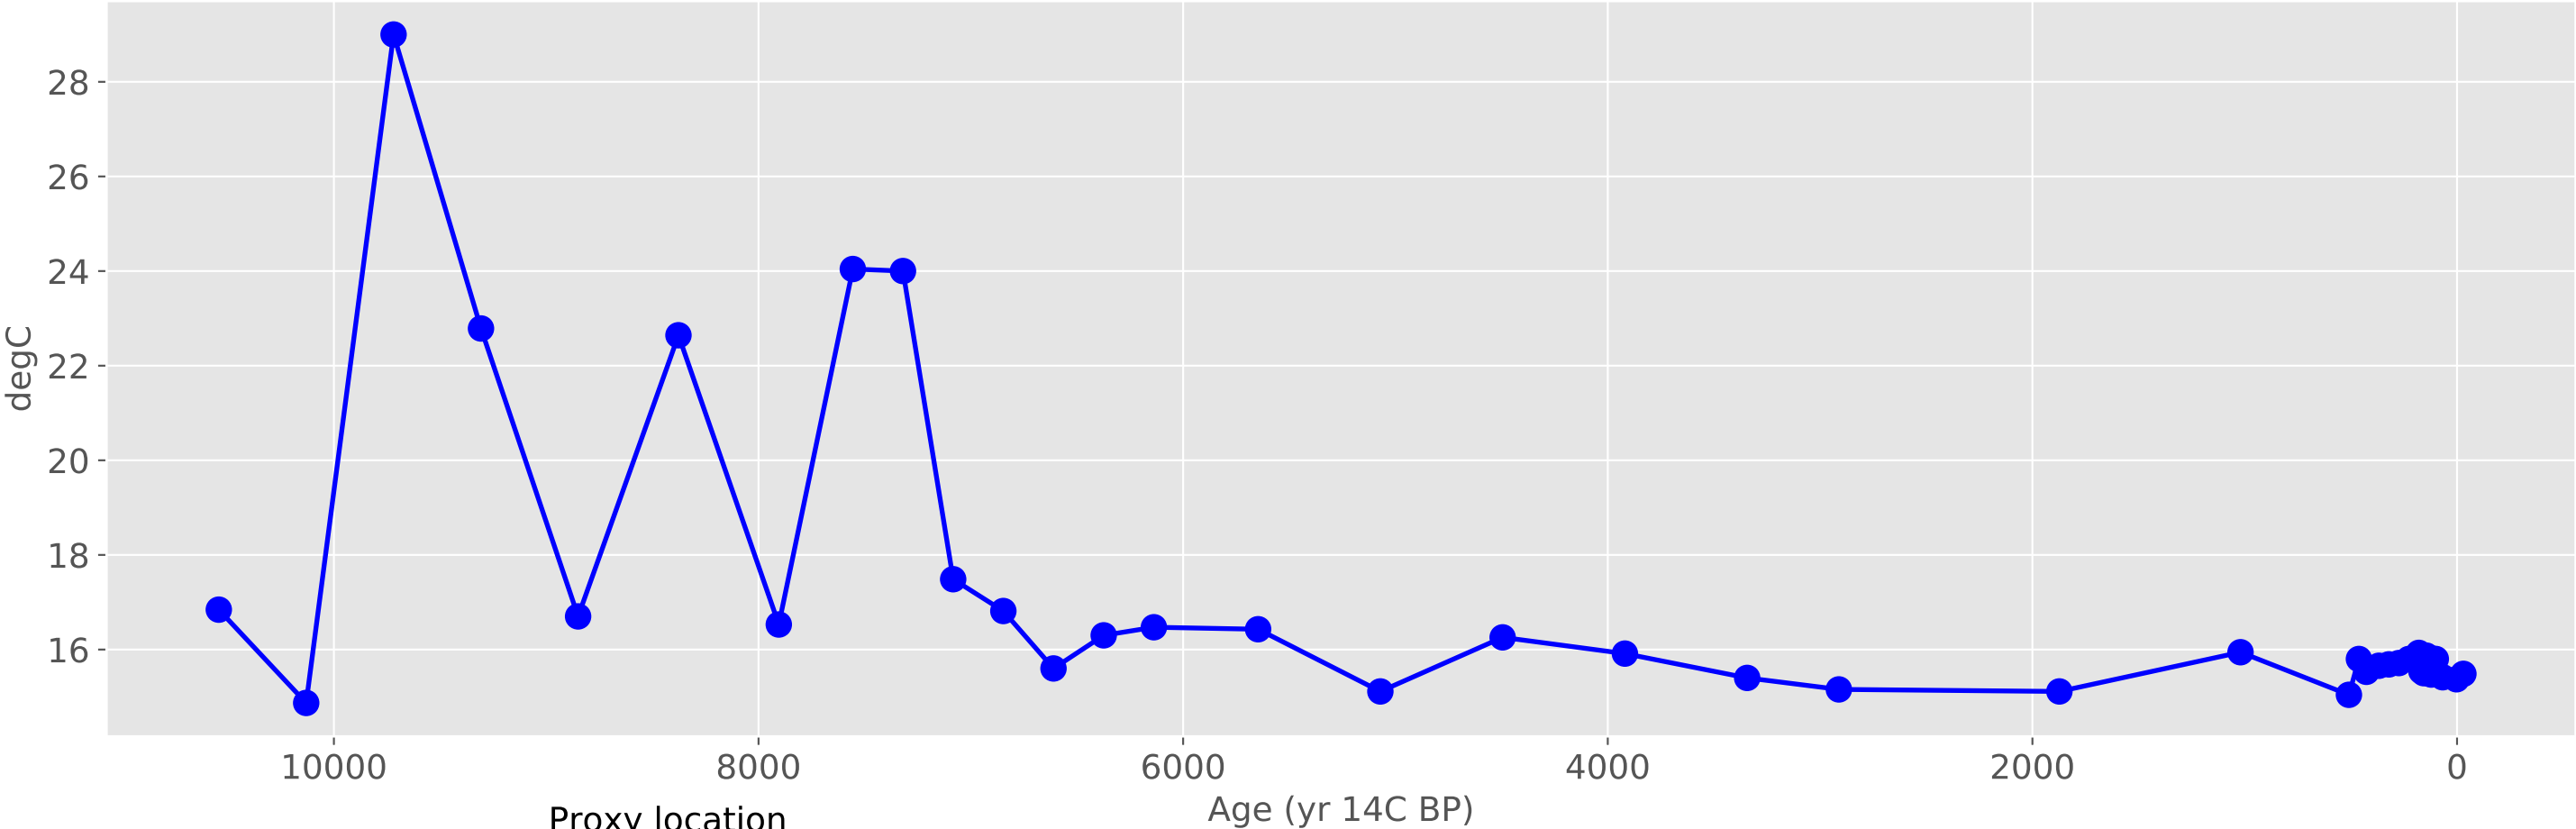

Proxy location  
(45.80 ° N, 122.49 ° W)



|                    |                                                       |
|--------------------|-------------------------------------------------------|
| Dataset name:      | BattleGround.Whitlock.1985                            |
| Archive type:      | LakeSediment                                          |
| Proxy type:        | pollen                                                |
| Variable name:     | temperature                                           |
| Latitude ( ° N):   | 45.8                                                  |
| Longitude ( ° E):  | -122.4917                                             |
| Elevation (m):     | 155.0                                                 |
| Interp. variable:  | T                                                     |
| Interp. detail:    | air@surface                                           |
| Interp. season:    | summer+                                               |
| Interp. direction: | positive                                              |
| Pub. 1 title:      | Late Quaternary vegetation near Battle Ground Lake... |
| Pub. 1 authors:    | Barnosky, C. W.                                       |
| Pub. 1 year:       | 1985                                                  |
| Pub. 1 DOI:        | 10.1130/0016-7606(1985)96<263:LQVNBG>2.0.CO;2         |
| Original data URL: | www.ncdc.noaa.gov/paleo/study/27330                   |



Proxy data and metadata  
LakeSediment | pollen | Little.Whitlock.1995 | M2L4dq6gc5iP

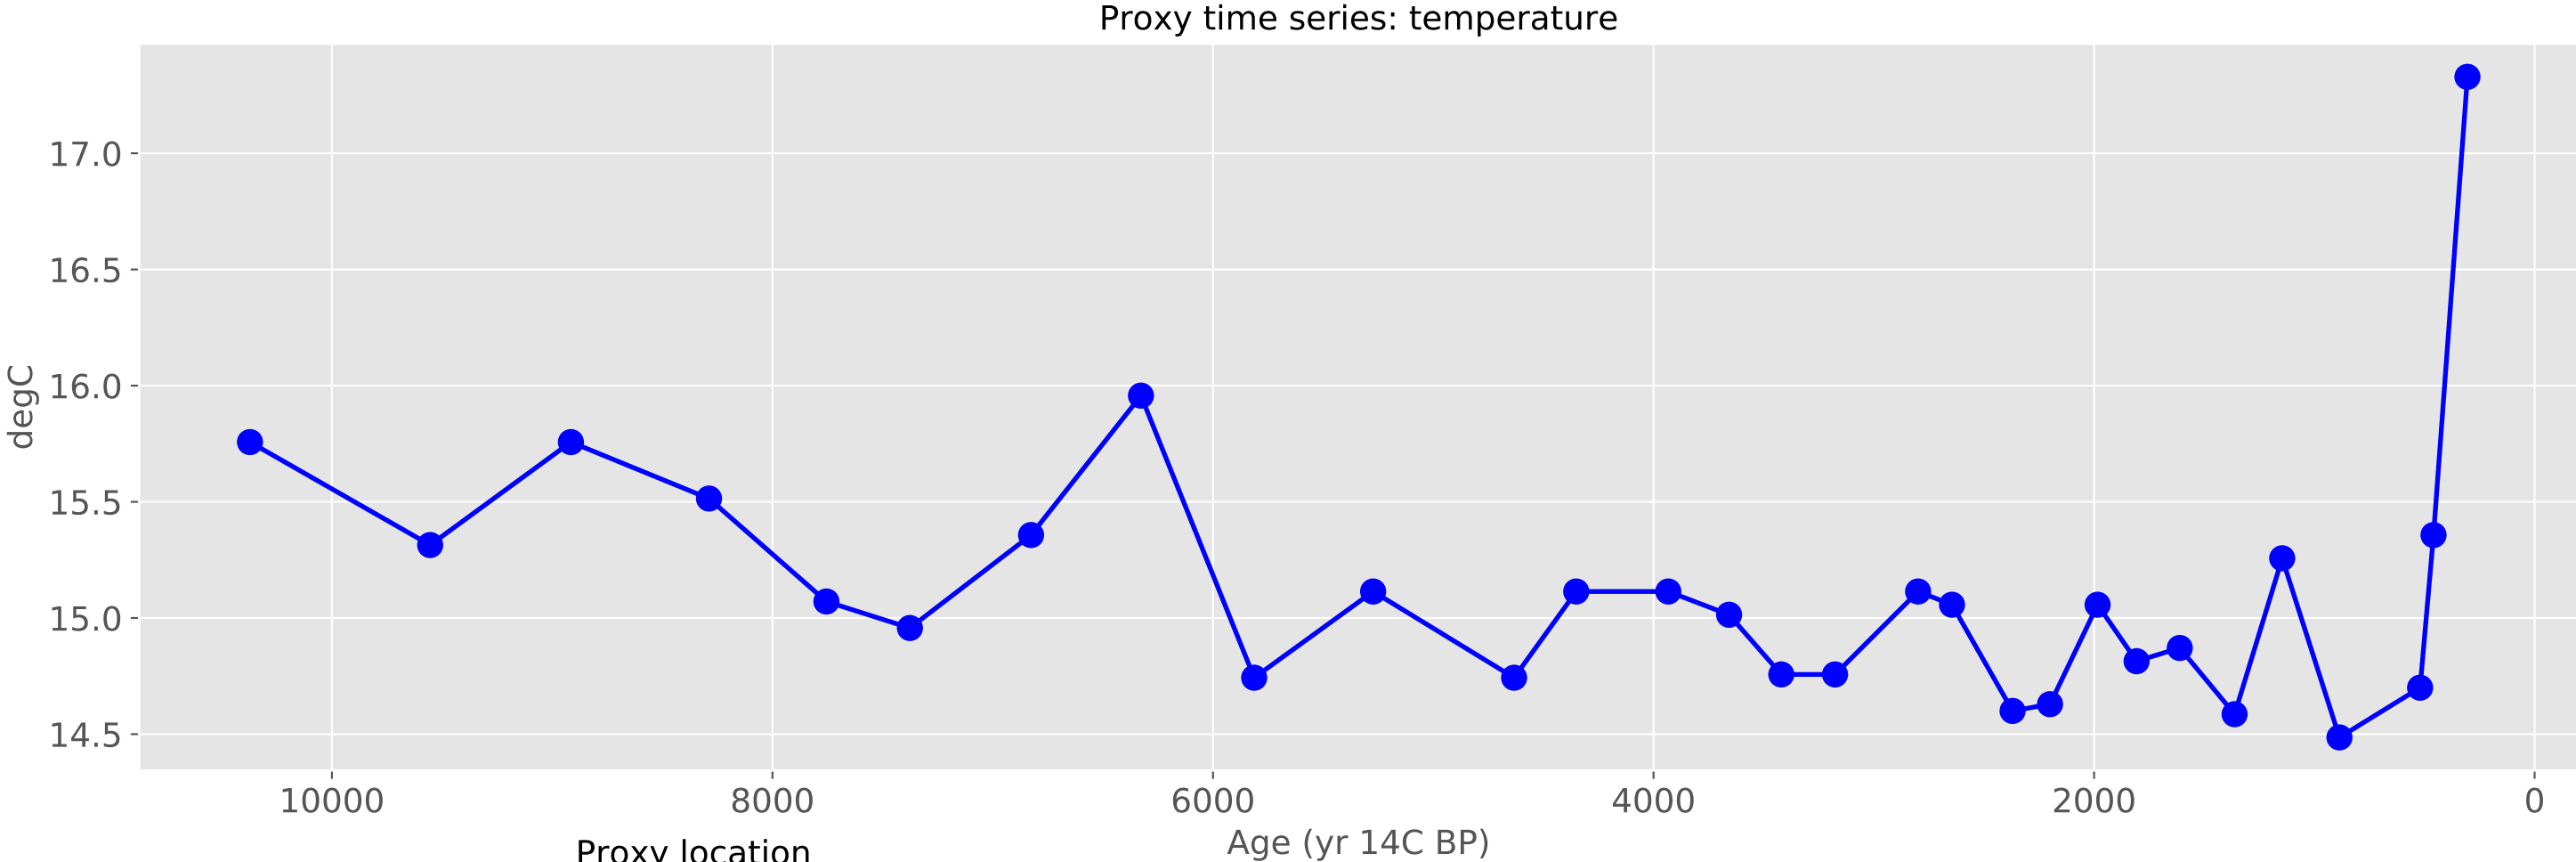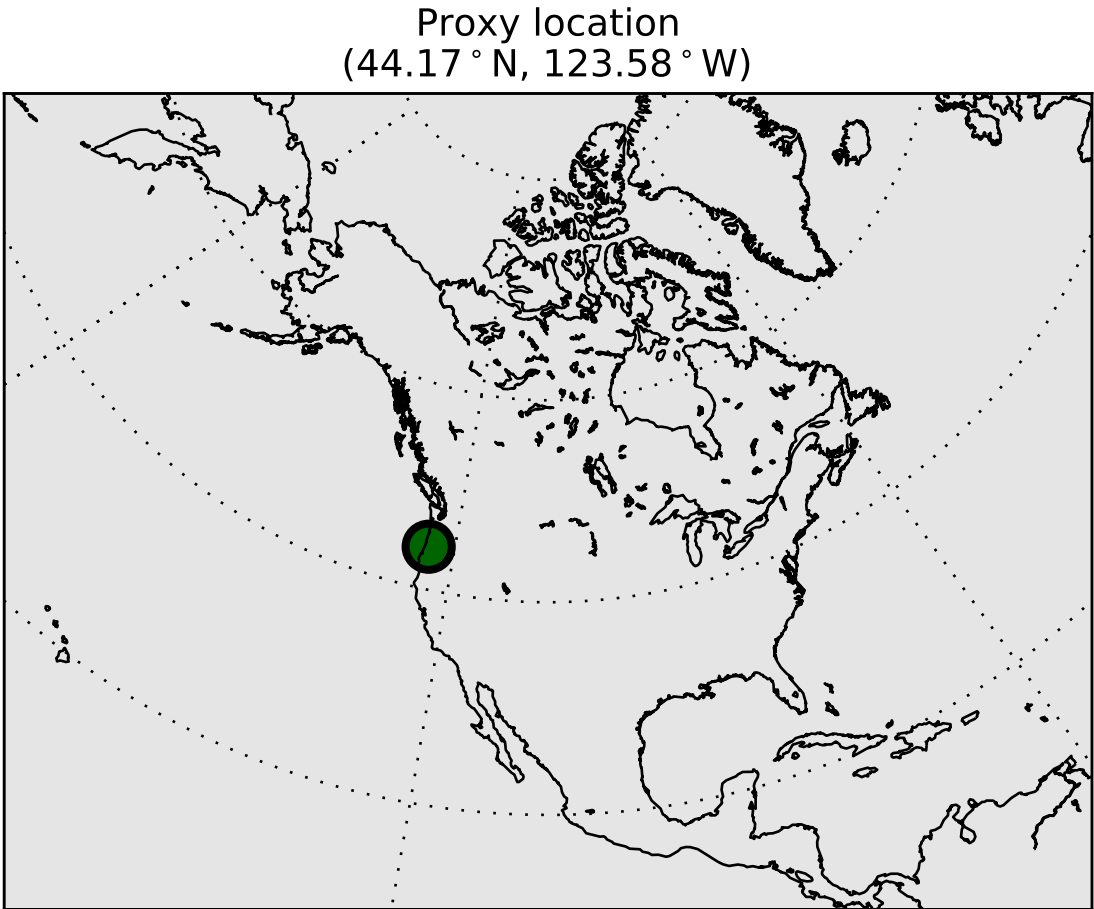

|                    |                                                       |
|--------------------|-------------------------------------------------------|
| Dataset name:      | Little.Whitlock.1995                                  |
| Archive type:      | LakeSediment                                          |
| Proxy type:        | pollen                                                |
| Variable name:     | temperature                                           |
| Latitude (° N):    | 44.17                                                 |
| Longitude (° E):   | -123.58                                               |
| Elevation (m):     | 217.0                                                 |
| Interp. variable:  | T                                                     |
| Interp. detail:    | air@surface                                           |
| Interp. season:    | summer+                                               |
| Interp. direction: | positive                                              |
| Pub. 1 title:      | Late Quaternary vegetation and climate history nea... |
| Pub. 1 authors:    | Worona, Marc A.; Whitlock, Cathy                      |
| Pub. 1 year:       | 1995                                                  |
| Pub. 1 DOI:        | 10.1130/0016-7606(1995)107<0867:LQVACH>2.3.CO;2       |
| Original data URL: | www.ncdc.noaa.gov/paleo/study/27330                   |

Proxy data and metadata  
LakeSediment | pollen | Little.Whitlock.1995 | M2Lcr8uiytaP

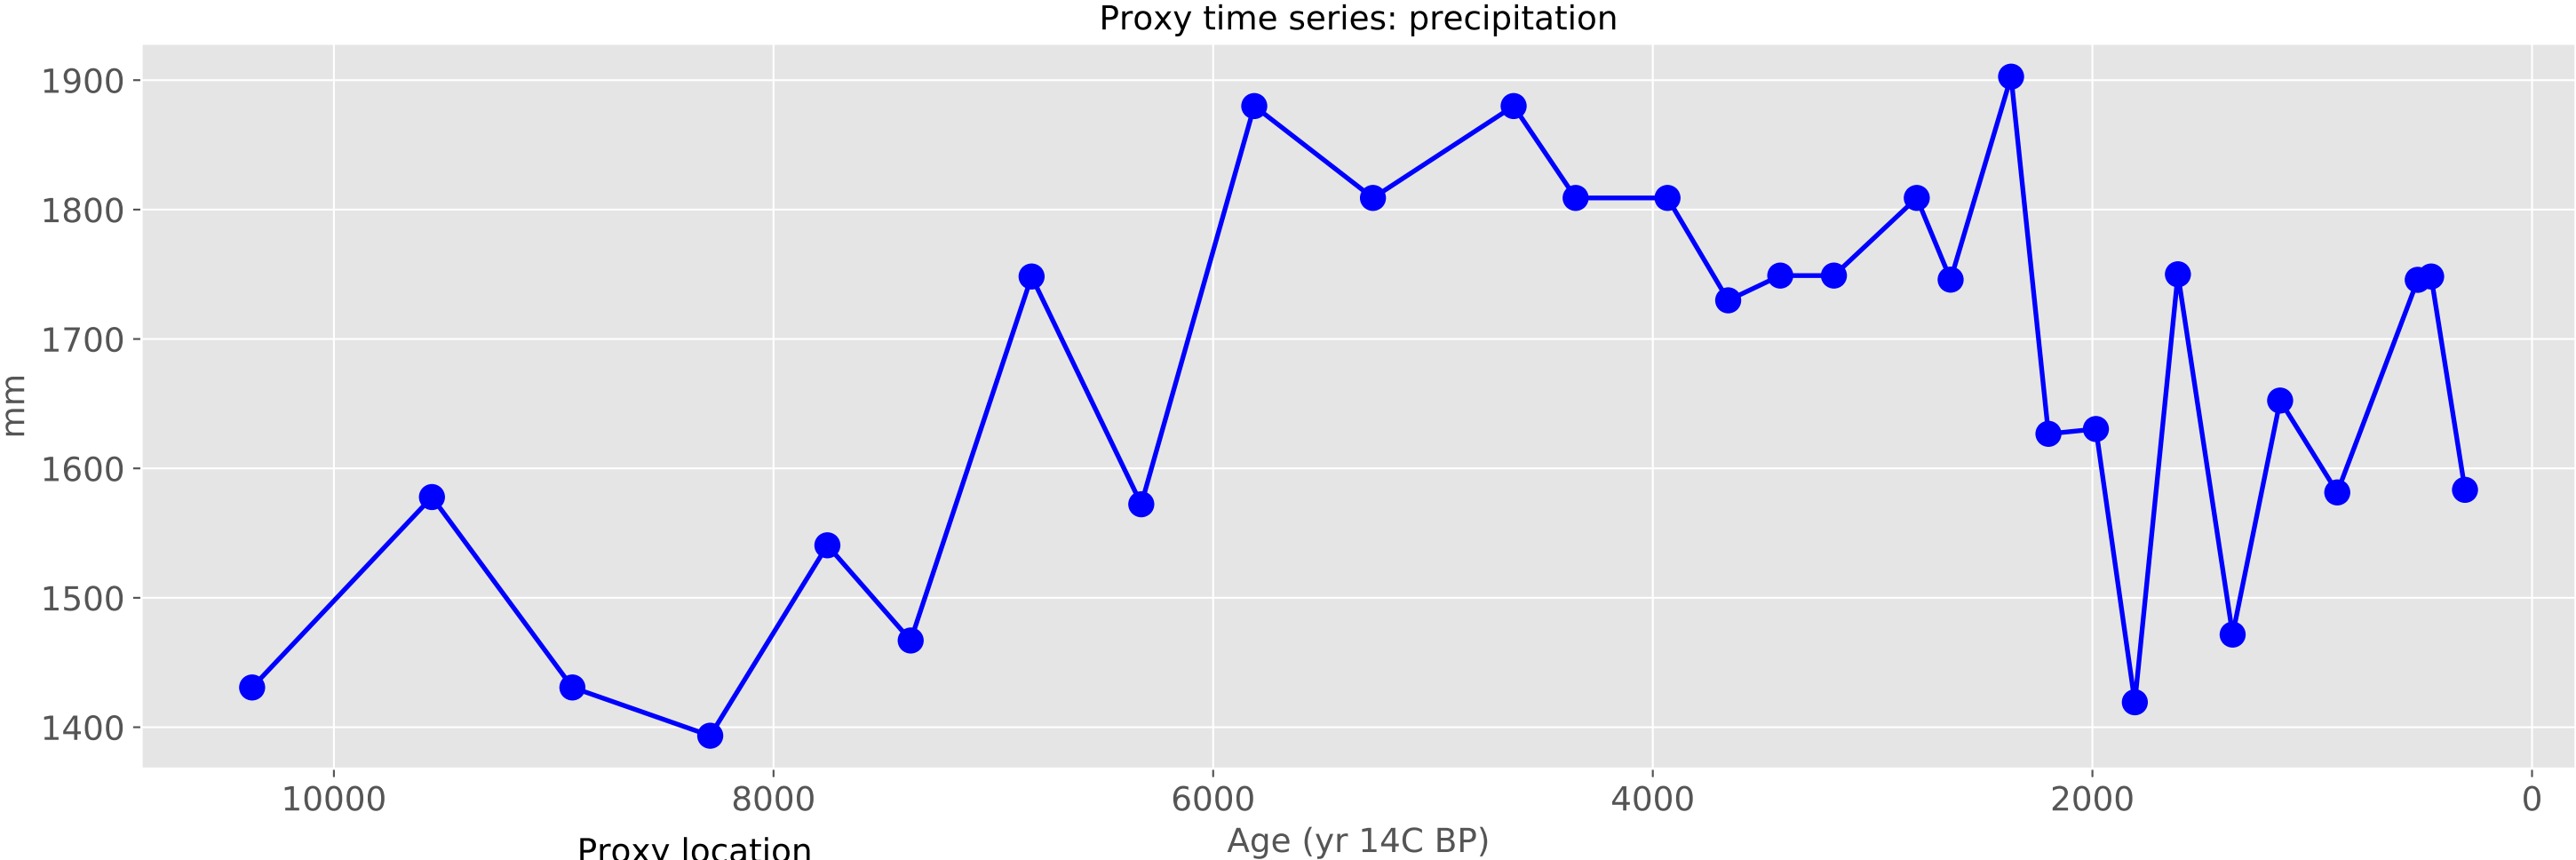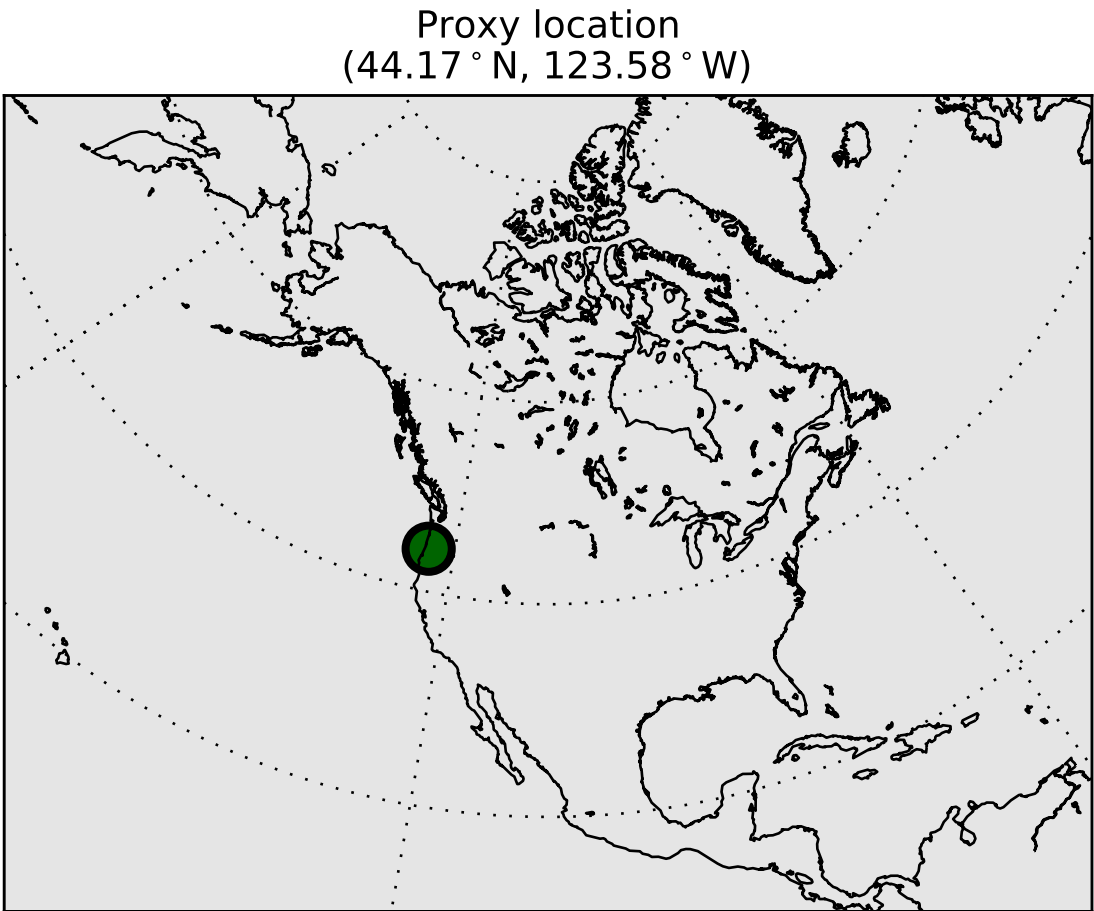

|                    |                                                       |
|--------------------|-------------------------------------------------------|
| Dataset name:      | Little.Whitlock.1995                                  |
| Archive type:      | LakeSediment                                          |
| Proxy type:        | pollen                                                |
| Variable name:     | precipitation                                         |
| Latitude (° N):    | 44.17                                                 |
| Longitude (° E):   | -123.58                                               |
| Elevation (m):     | 217.0                                                 |
| Interp. variable:  | P                                                     |
| Interp. detail:    | amount@surface                                        |
| Interp. season:    | annual                                                |
| Interp. direction: | positive                                              |
| Pub. 1 title:      | Late Quaternary vegetation and climate history nea... |
| Pub. 1 authors:    | Worona, Marc A.; Whitlock, Cathy                      |
| Pub. 1 year:       | 1995                                                  |
| Pub. 1 DOI:        | 10.1130/0016-7606(1995)107<0867:LQVACH>2.3.CO;2       |
| Original data URL: | www.ncdc.noaa.gov/paleo/study/27330                   |

Proxy data and metadata  
LakeSediment | pollen | Little.Whitlock.1995 | M2Ldfq1I29fP

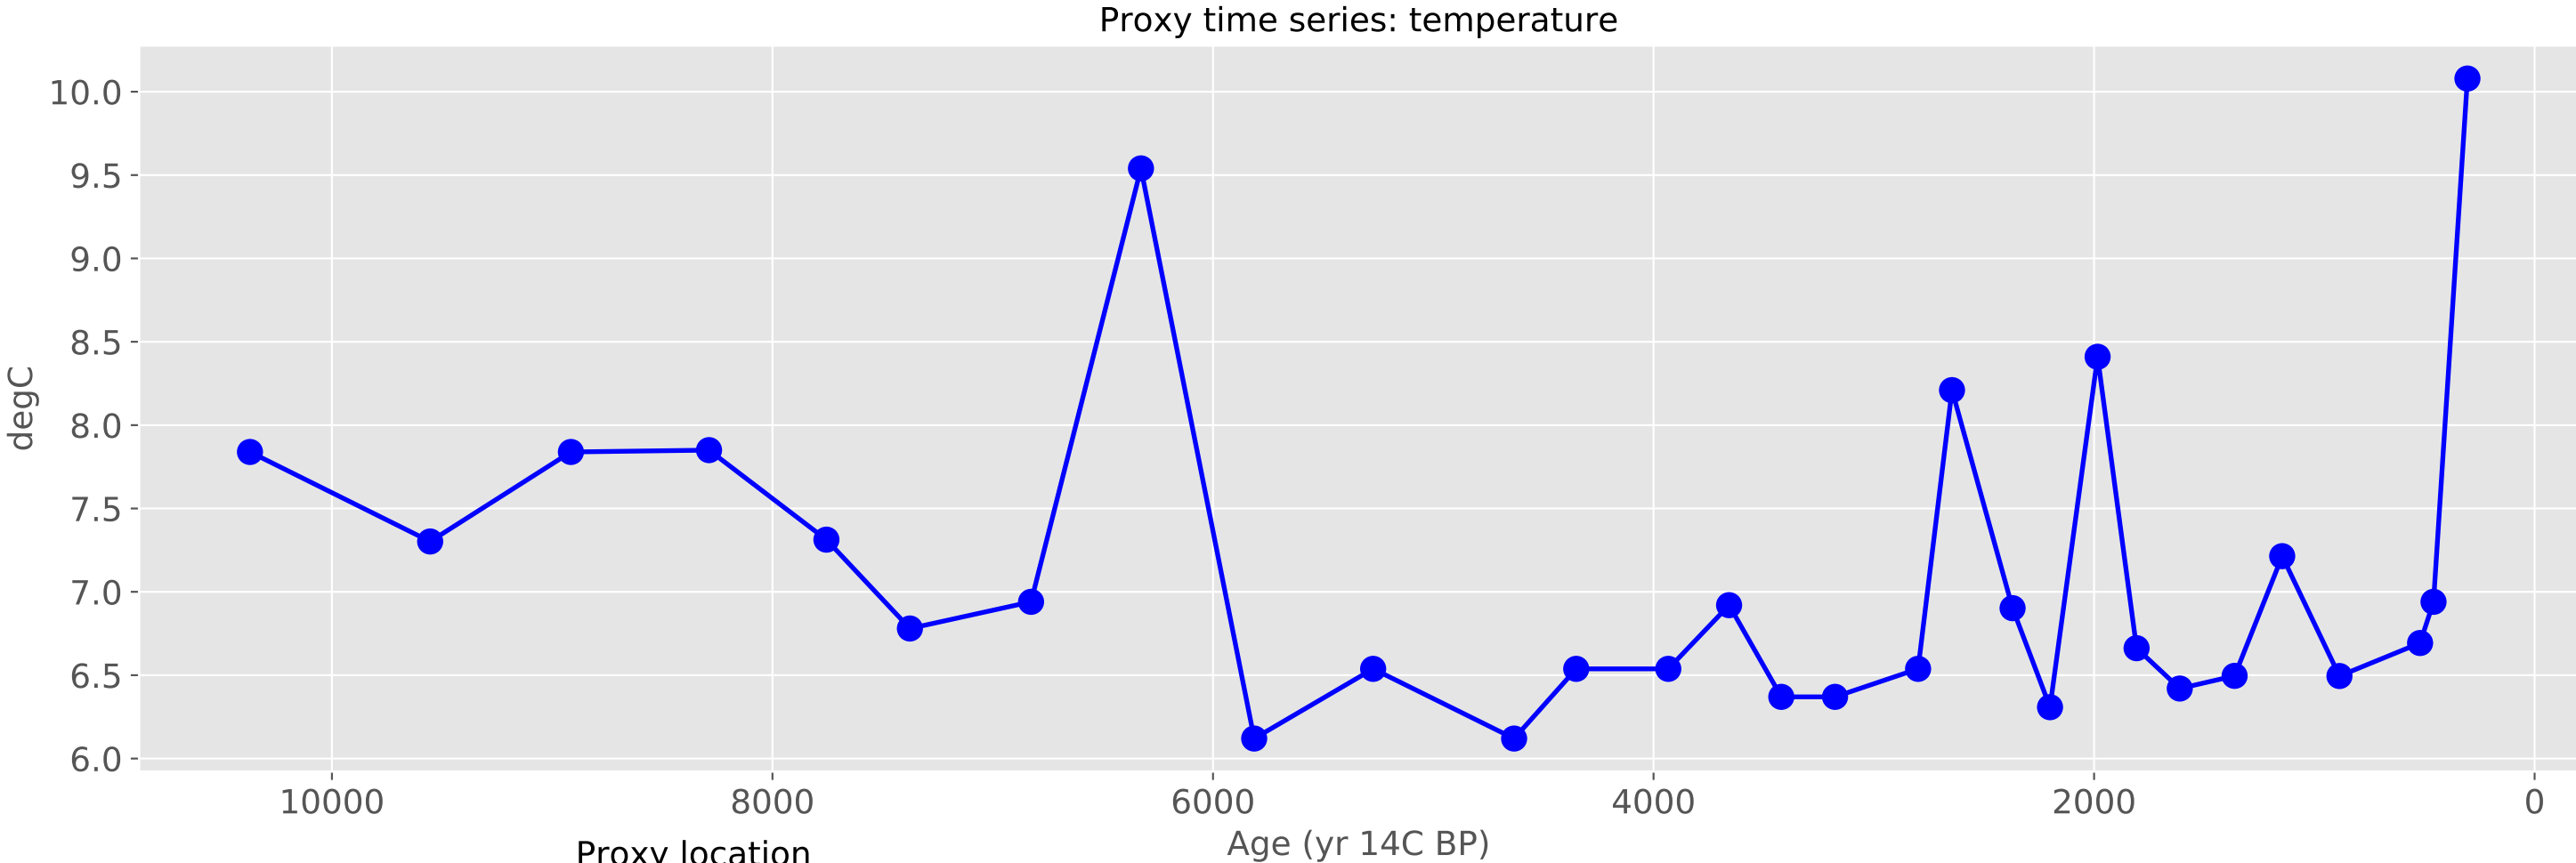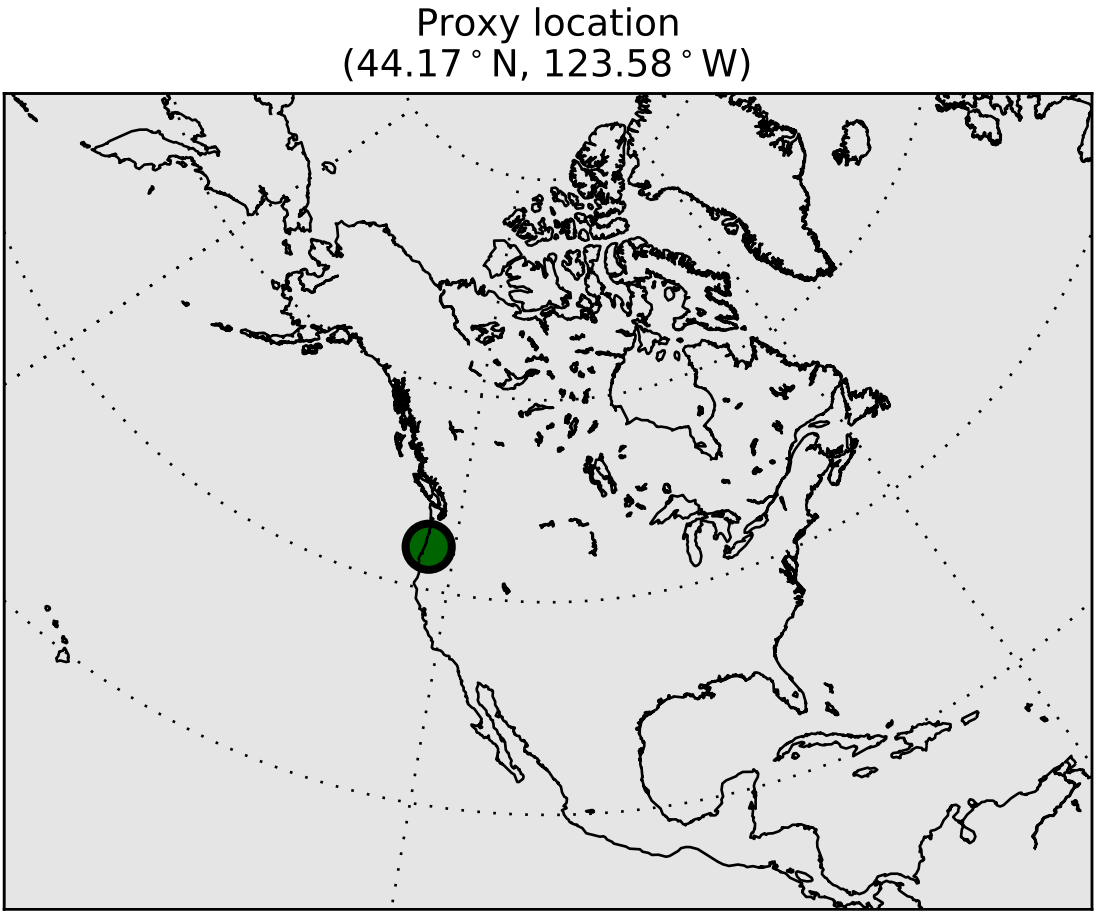

|                    |                                                       |
|--------------------|-------------------------------------------------------|
| Dataset name:      | Little.Whitlock.1995                                  |
| Archive type:      | LakeSediment                                          |
| Proxy type:        | pollen                                                |
| Variable name:     | temperature                                           |
| Latitude (° N):    | 44.17                                                 |
| Longitude (° E):   | -123.58                                               |
| Elevation (m):     | 217.0                                                 |
| Interp. variable:  | T                                                     |
| Interp. detail:    | air@surface                                           |
| Interp. season:    | annual                                                |
| Interp. direction: | positive                                              |
| Pub. 1 title:      | Late Quaternary vegetation and climate history nea... |
| Pub. 1 authors:    | Worona, Marc A.; Whitlock, Cathy                      |
| Pub. 1 year:       | 1995                                                  |
| Pub. 1 DOI:        | 10.1130/0016-7606(1995)107<0867:LQVACH>2.3.CO;2       |
| Original data URL: | www.ncdc.noaa.gov/paleo/study/27330                   |

Proxy data and metadata  
LakeSediment | pollen | Little.Whitlock.1995 | M2Le1i1npbzP

Proxy time series: temperature

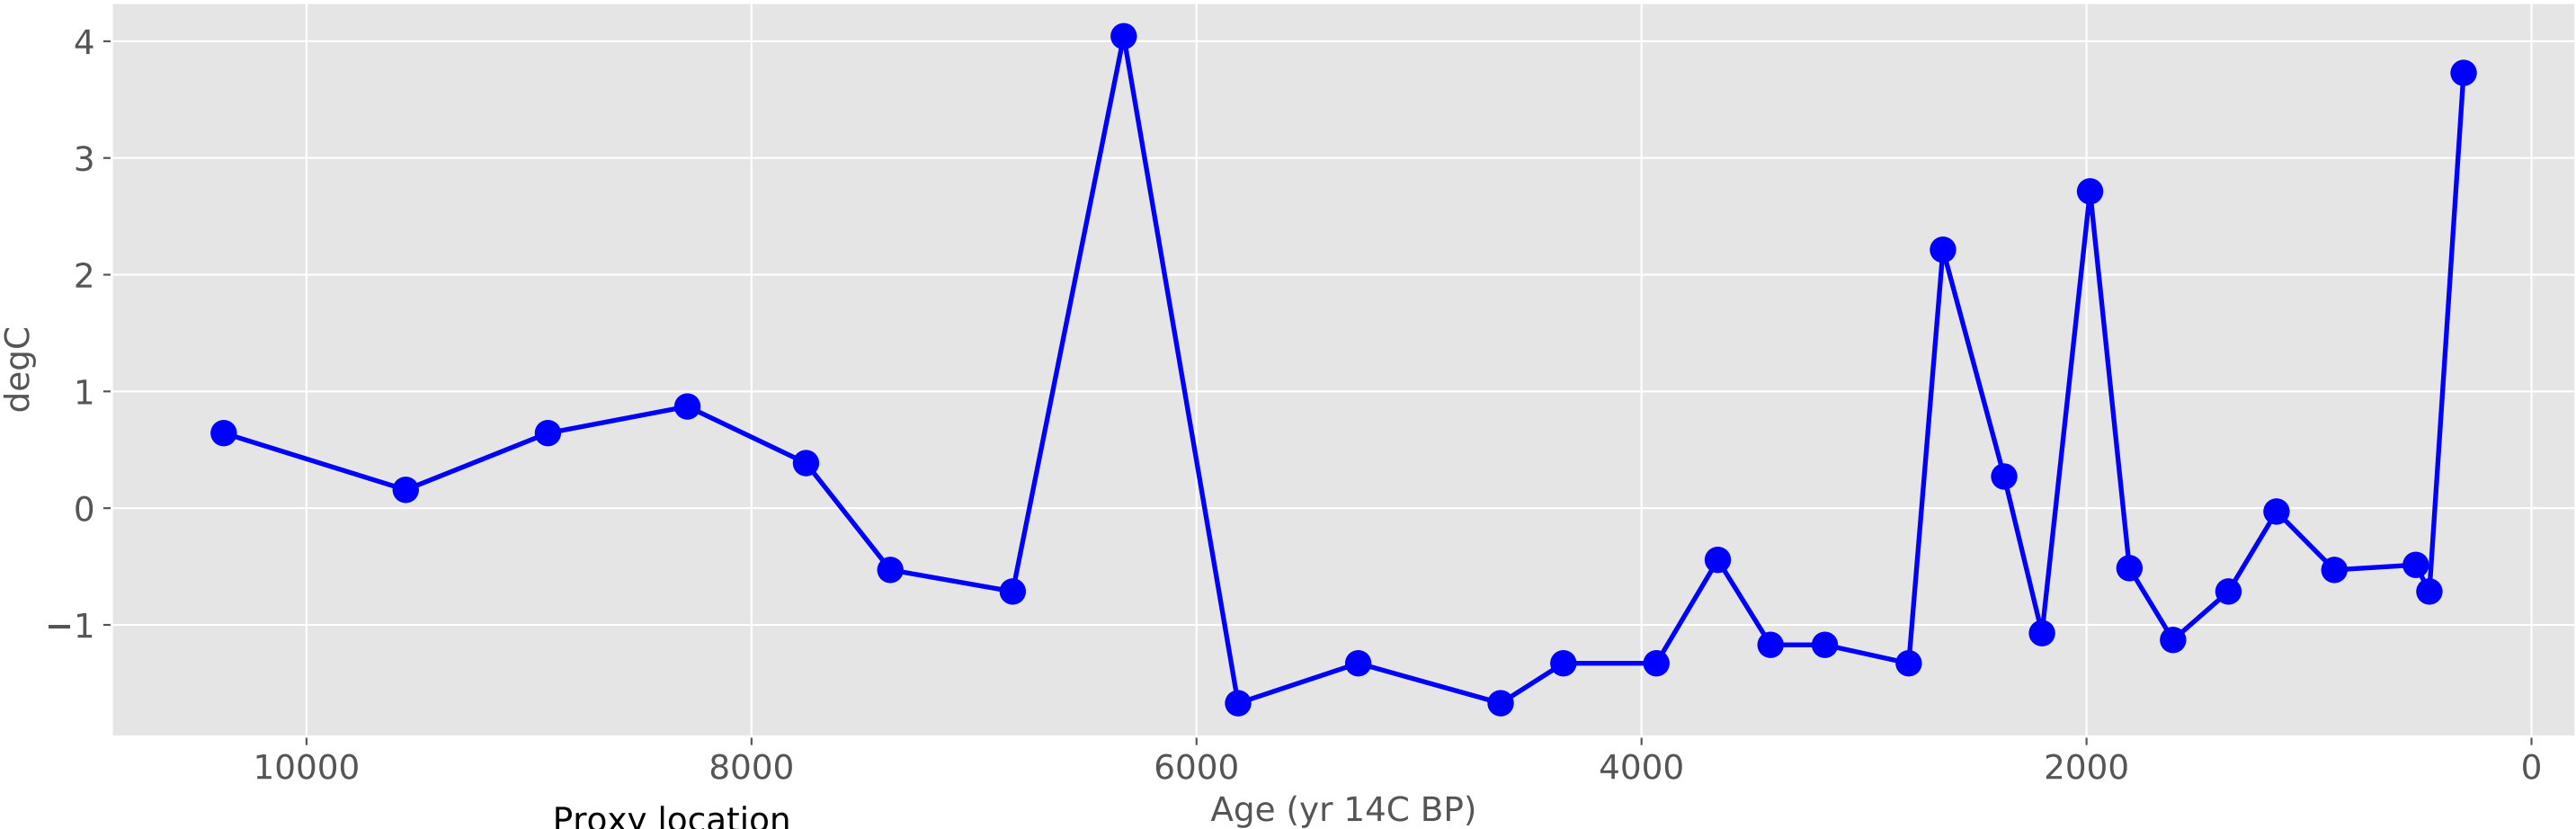

Proxy location  
(44.17° N, 123.58° W)

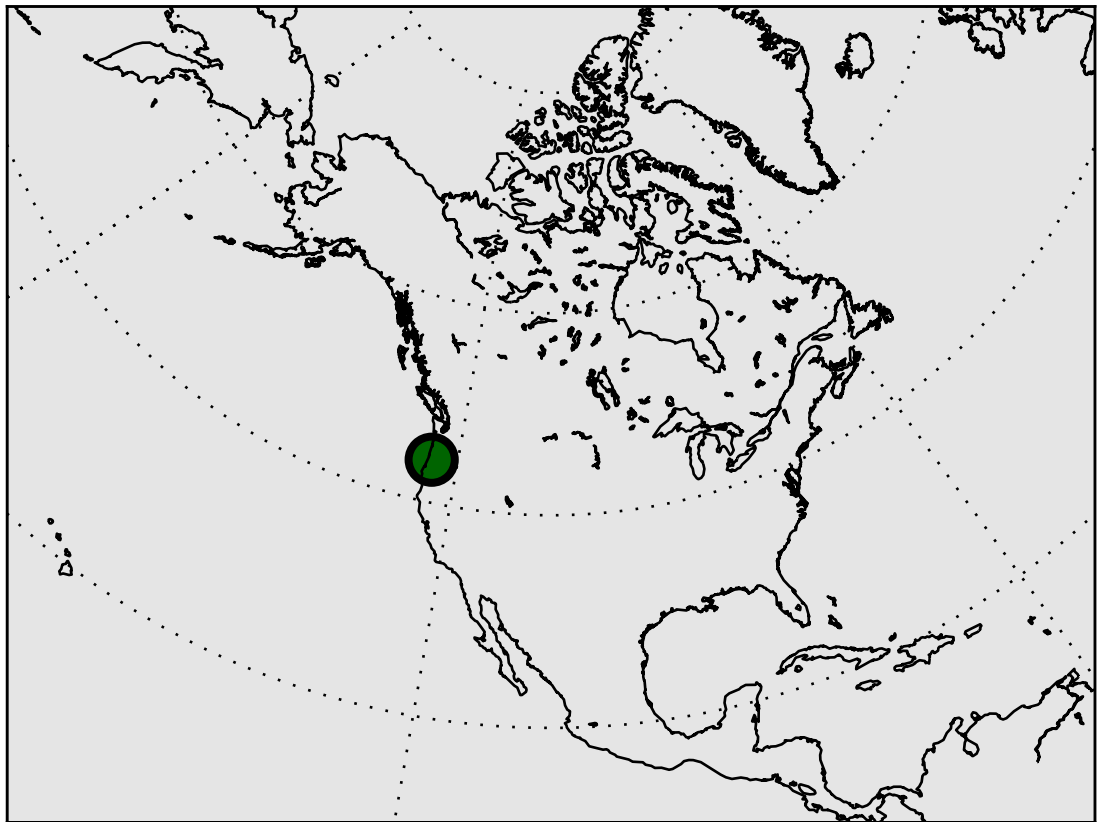

|                    |                                                       |
|--------------------|-------------------------------------------------------|
| Dataset name:      | Little.Whitlock.1995                                  |
| Archive type:      | LakeSediment                                          |
| Proxy type:        | pollen                                                |
| Variable name:     | temperature                                           |
| Latitude (° N):    | 44.17                                                 |
| Longitude (° E):   | -123.58                                               |
| Elevation (m):     | 217.0                                                 |
| Interp. variable:  | T                                                     |
| Interp. detail:    | air@surface                                           |
| Interp. season:    | winter+                                               |
| Interp. direction: | positive                                              |
| Pub. 1 title:      | Late Quaternary vegetation and climate history nea... |
| Pub. 1 authors:    | Worona, Marc A.; Whitlock, Cathy                      |
| Pub. 1 year:       | 1995                                                  |
| Pub. 1 DOI:        | 10.1130/0016-7606(1995)107<0867:LQVACH>2.3.CO;2       |
| Original data URL: | www.ncdc.noaa.gov/paleo/study/27330                   |

Proxy data and metadata  
**LakeSediment | pollen | ParkPond1.Lynch.1998 | M2L63wmizbwP**

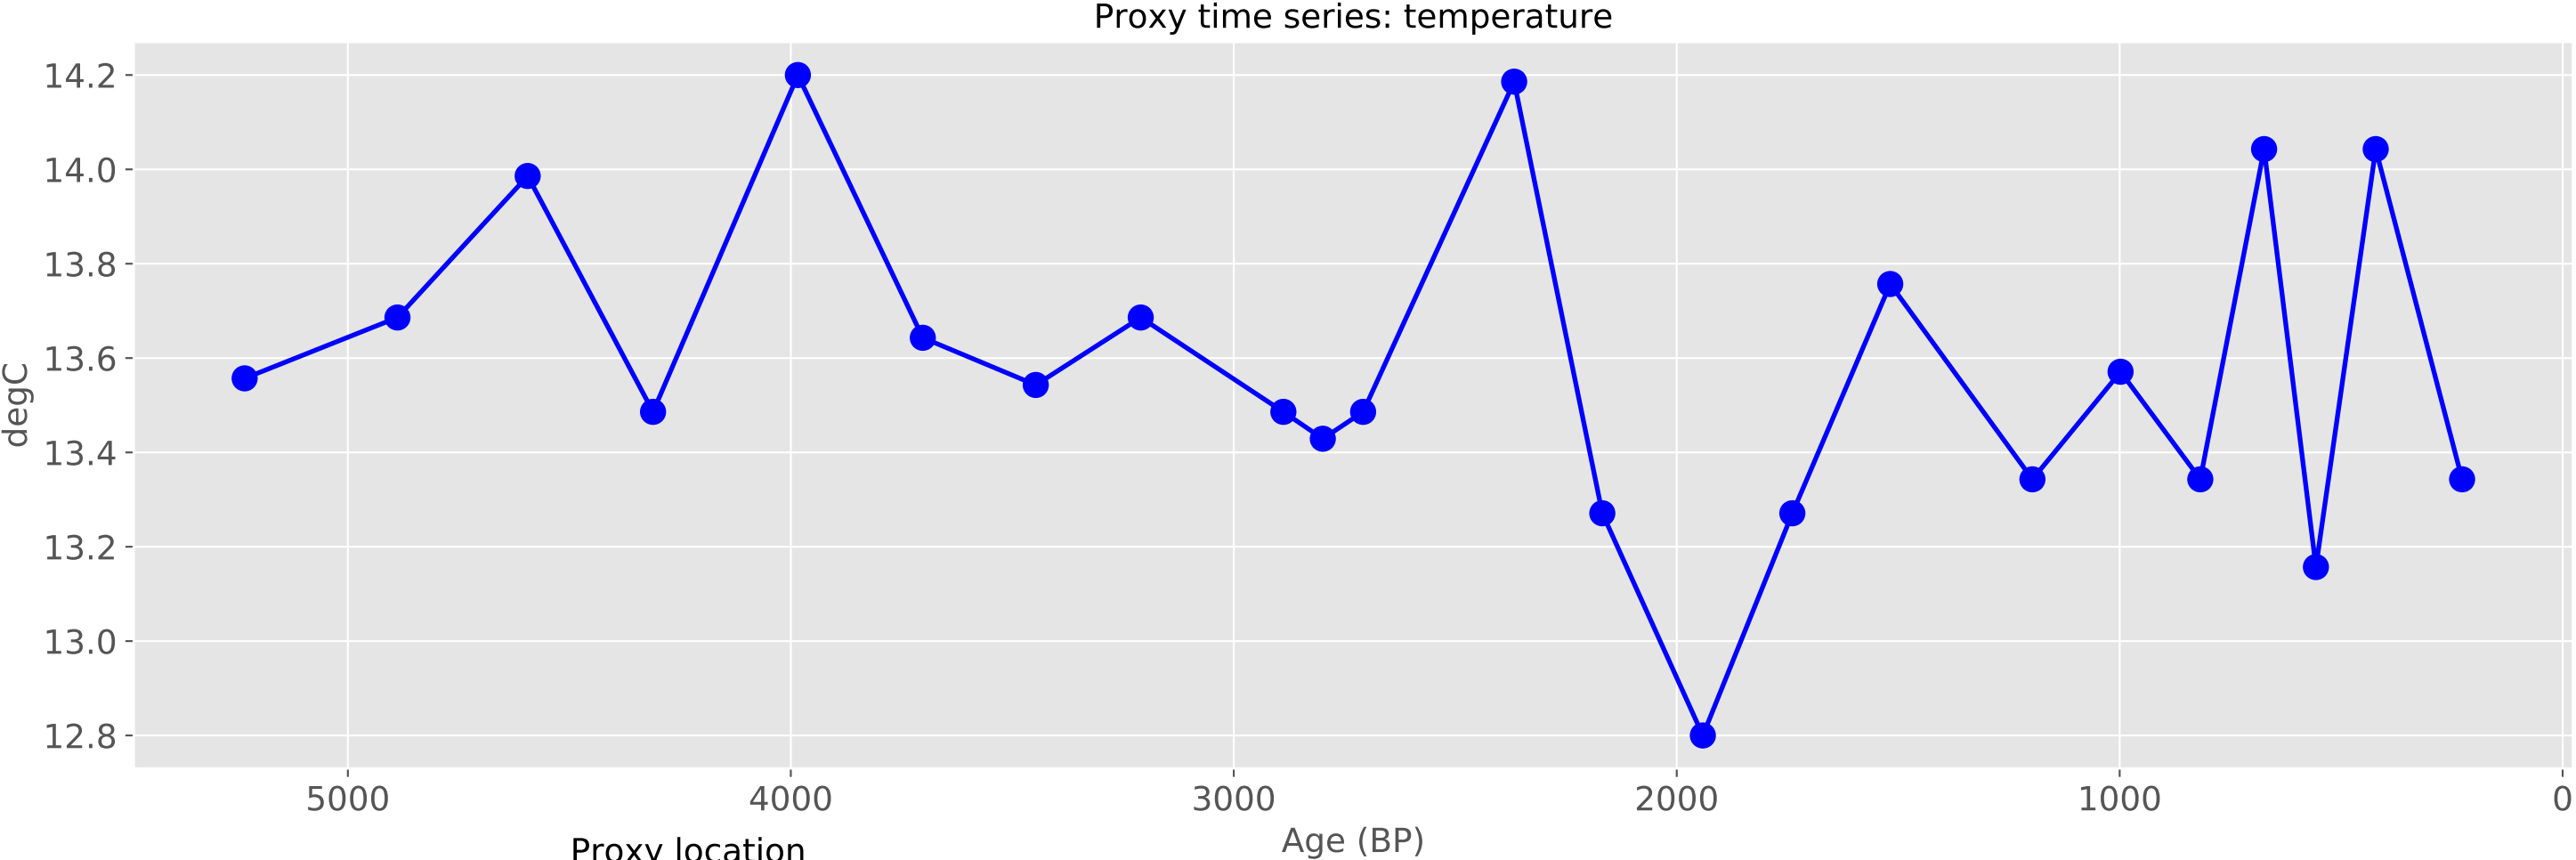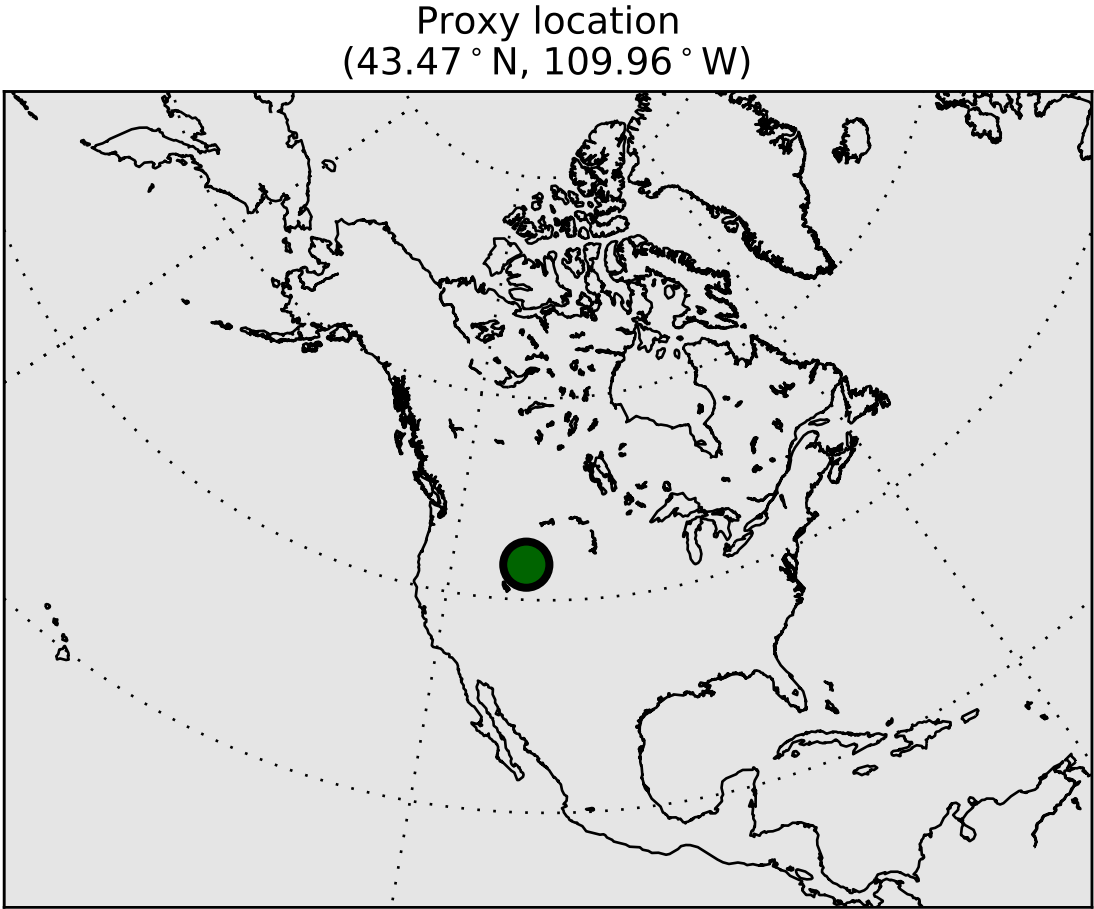

|                    |                                                       |
|--------------------|-------------------------------------------------------|
| Dataset name:      | ParkPond1.Lynch.1998                                  |
| Archive type:      | LakeSediment                                          |
| Proxy type:        | pollen                                                |
| Variable name:     | temperature                                           |
| Latitude ( ° N):   | 43.47                                                 |
| Longitude ( ° E):  | -109.96                                               |
| Elevation (m):     | 2705.0                                                |
| Interp. variable:  | T                                                     |
| Interp. detail:    | air@surface                                           |
| Interp. season:    | summer+                                               |
| Interp. direction: | positive                                              |
| Pub. 1 title:      | Origin of a park-forest vegetation mosaic in the W... |
| Pub. 1 authors:    | Lynch, Elizabeth A.                                   |
| Pub. 1 year:       | 1998                                                  |
| Pub. 1 DOI:        | 10.1890/0012-9658(1998)079[1320:OOAPFV]2.0.CO;2       |
| Original data URL: | www.ncdc.noaa.gov/paleo/study/27330                   |

Proxy data and metadata  
LakeSediment | pollen | ParkPond1.Lynch.1998 | M2L8gmvex23P

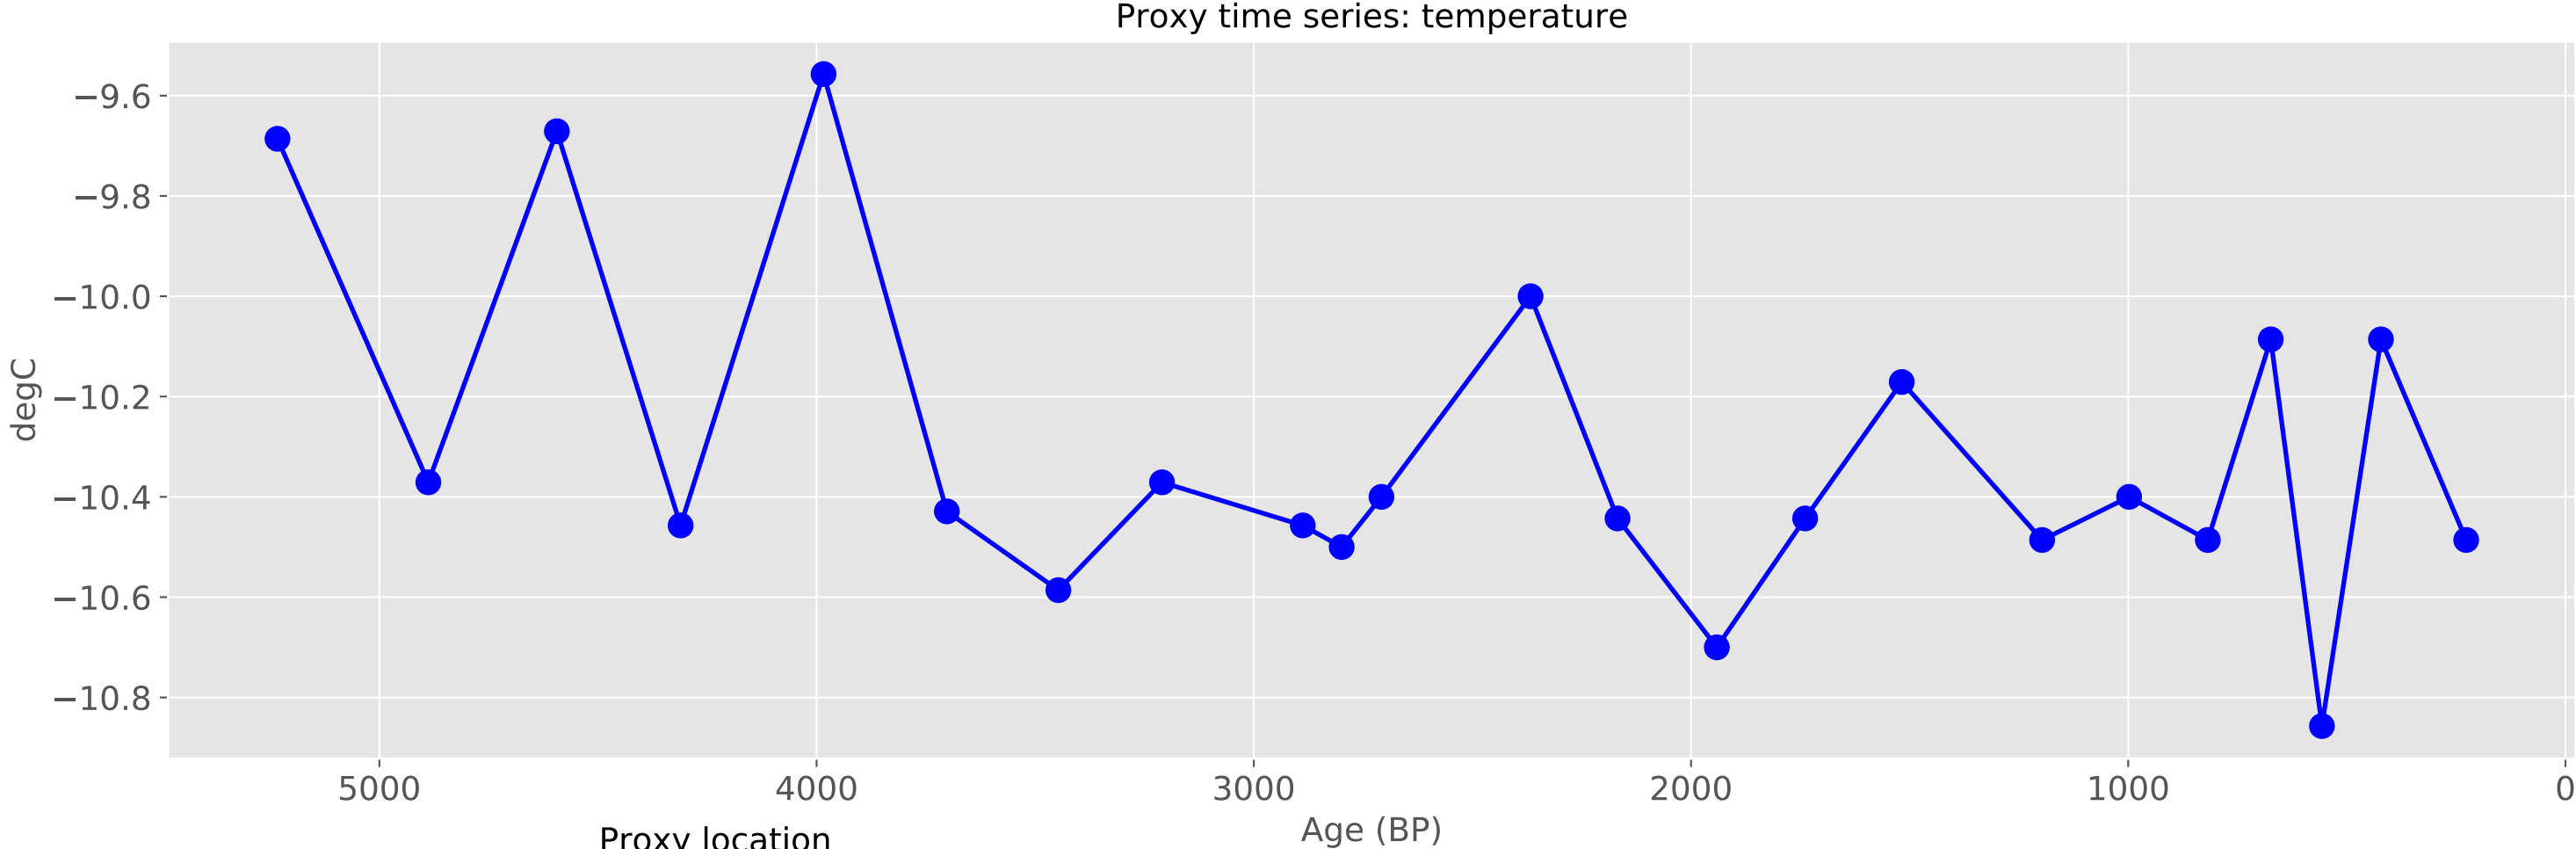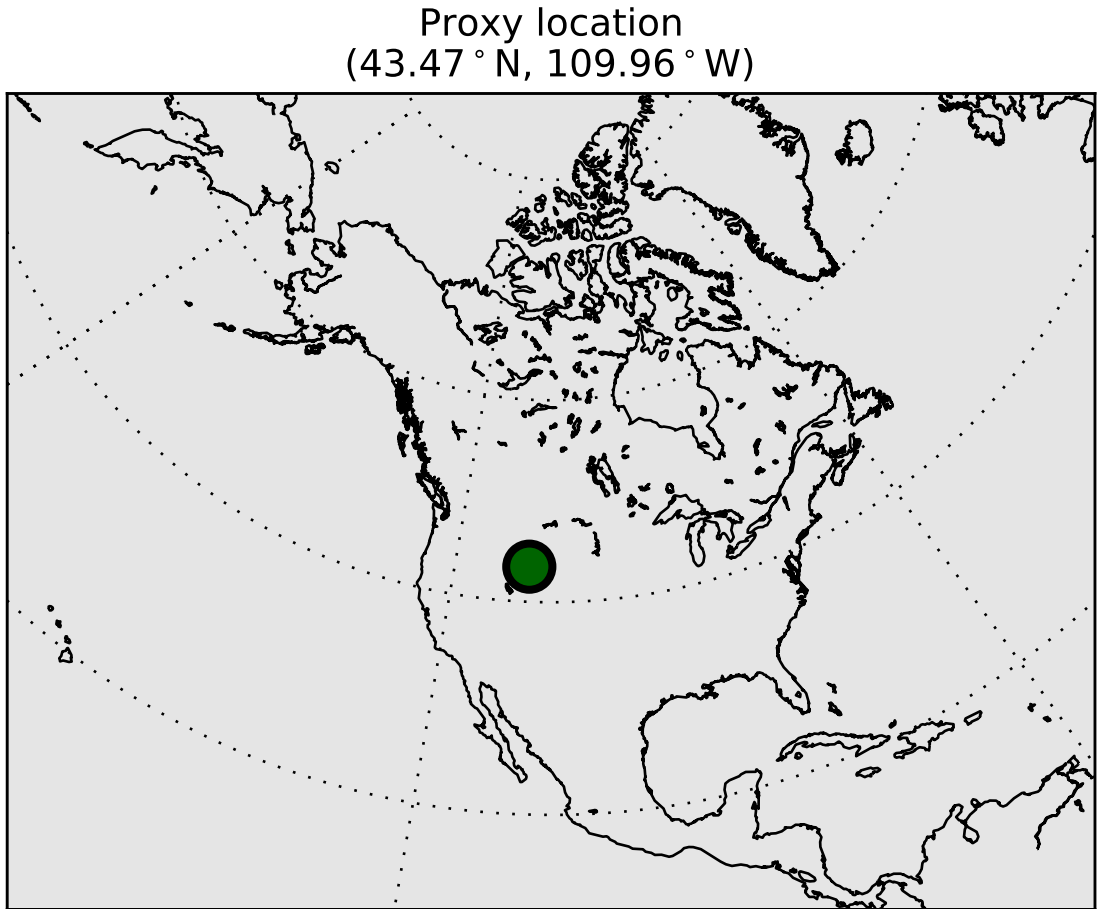

|                    |                                                       |
|--------------------|-------------------------------------------------------|
| Dataset name:      | ParkPond1.Lynch.1998                                  |
| Archive type:      | LakeSediment                                          |
| Proxy type:        | pollen                                                |
| Variable name:     | temperature                                           |
| Latitude ( ° N):   | 43.47                                                 |
| Longitude ( ° E):  | -109.96                                               |
| Elevation (m):     | 2705.0                                                |
| Interp. variable:  | T                                                     |
| Interp. detail:    | air@surface                                           |
| Interp. season:    | winter+                                               |
| Interp. direction: | positive                                              |
| Pub. 1 title:      | Origin of a park-forest vegetation mosaic in the W... |
| Pub. 1 authors:    | Lynch, Elizabeth A.                                   |
| Pub. 1 year:       | 1998                                                  |
| Pub. 1 DOI:        | 10.1890/0012-9658(1998)079[1320:OOAPFV]2.0.CO;2       |
| Original data URL: | www.ncdc.noaa.gov/paleo/study/27330                   |



Proxy data and metadata  
LakeSediment | pollen | ParkPond1.Lynch.1998 | M2Ld1pgjspxP

Proxy time series: precipitation

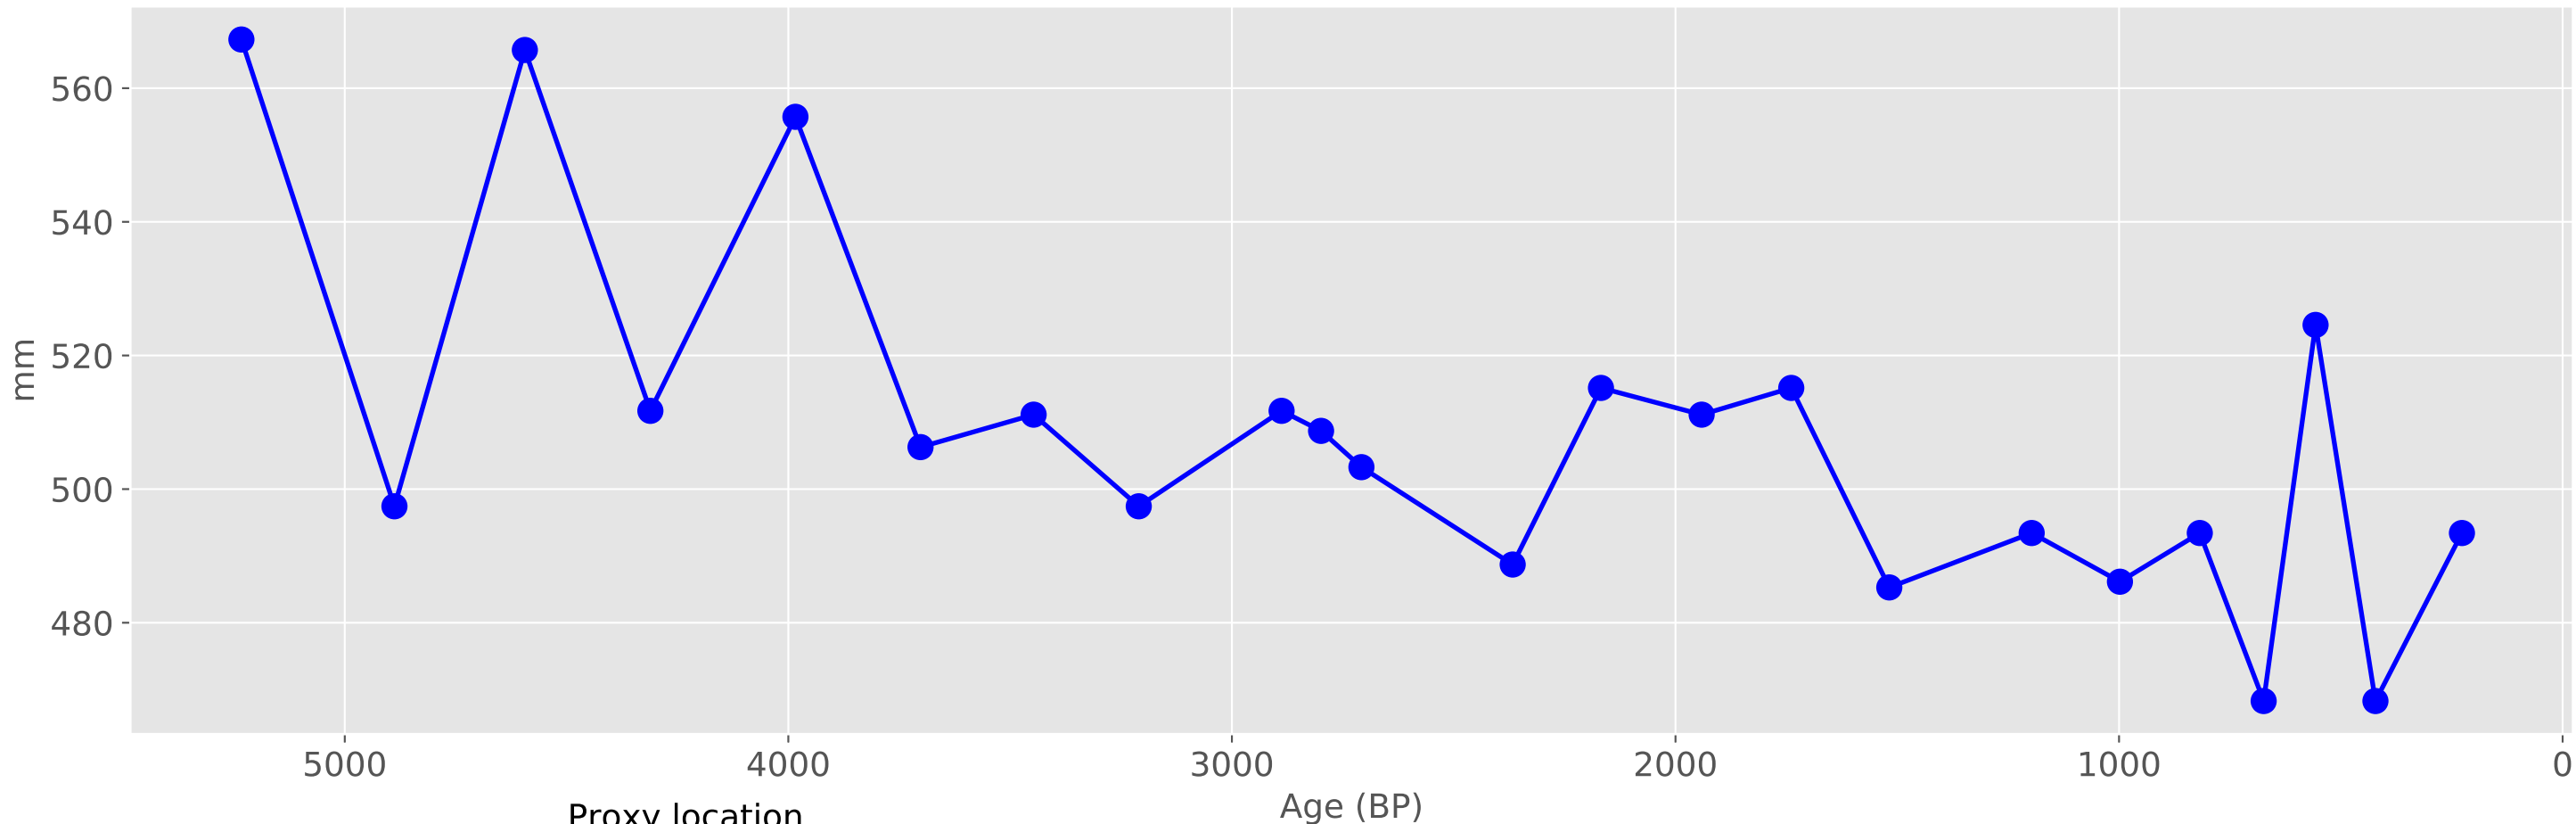

Proxy location  
(43.47 ° N, 109.96 ° W)

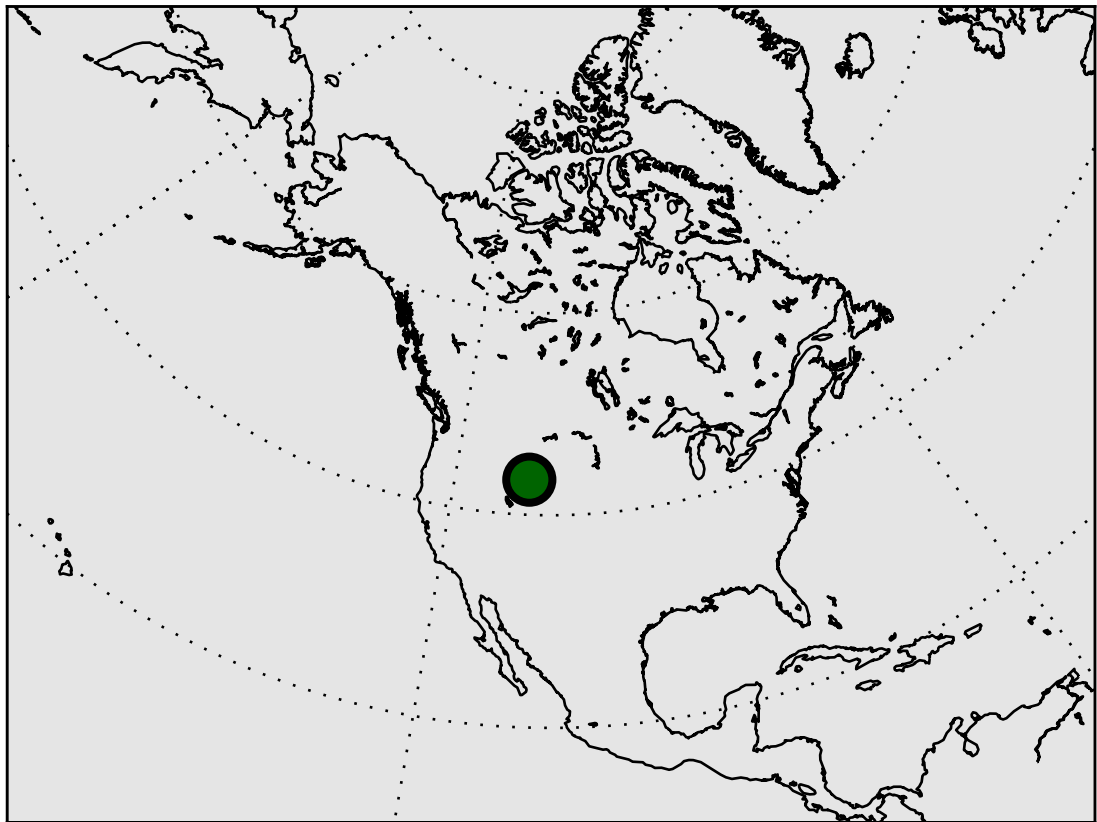

|                    |                                                                                              |
|--------------------|----------------------------------------------------------------------------------------------|
| Dataset name:      | ParkPond1.Lynch.1998                                                                         |
| Archive type:      | LakeSediment                                                                                 |
| Proxy type:        | pollen                                                                                       |
| Variable name:     | precipitation                                                                                |
| Latitude ( ° N):   | 43.47                                                                                        |
| Longitude ( ° E):  | -109.96                                                                                      |
| Elevation (m):     | 2705.0                                                                                       |
| Interp. variable:  | P                                                                                            |
| Interp. detail:    | amount@surface                                                                               |
| Interp. season:    | annual                                                                                       |
| Interp. direction: | positive                                                                                     |
| Pub. 1 title:      | Origin of a park-forest vegetation mosaic in the W...                                        |
| Pub. 1 authors:    | Lynch, Elizabeth A.                                                                          |
| Pub. 1 year:       | 1998                                                                                         |
| Pub. 1 DOI:        | 10.1890/0012-9658(1998)079[1320:OOAPFV]2.0.CO;2                                              |
| Original data URL: | <a href="http://www.ncdc.noaa.gov/paleo/study/27330">www.ncdc.noaa.gov/paleo/study/27330</a> |

Proxy data and metadata  
**LakeSediment | pollen | ParkPond1.Lynch.1998 | M2Lubfra1b3P**

Proxy time series: temperature

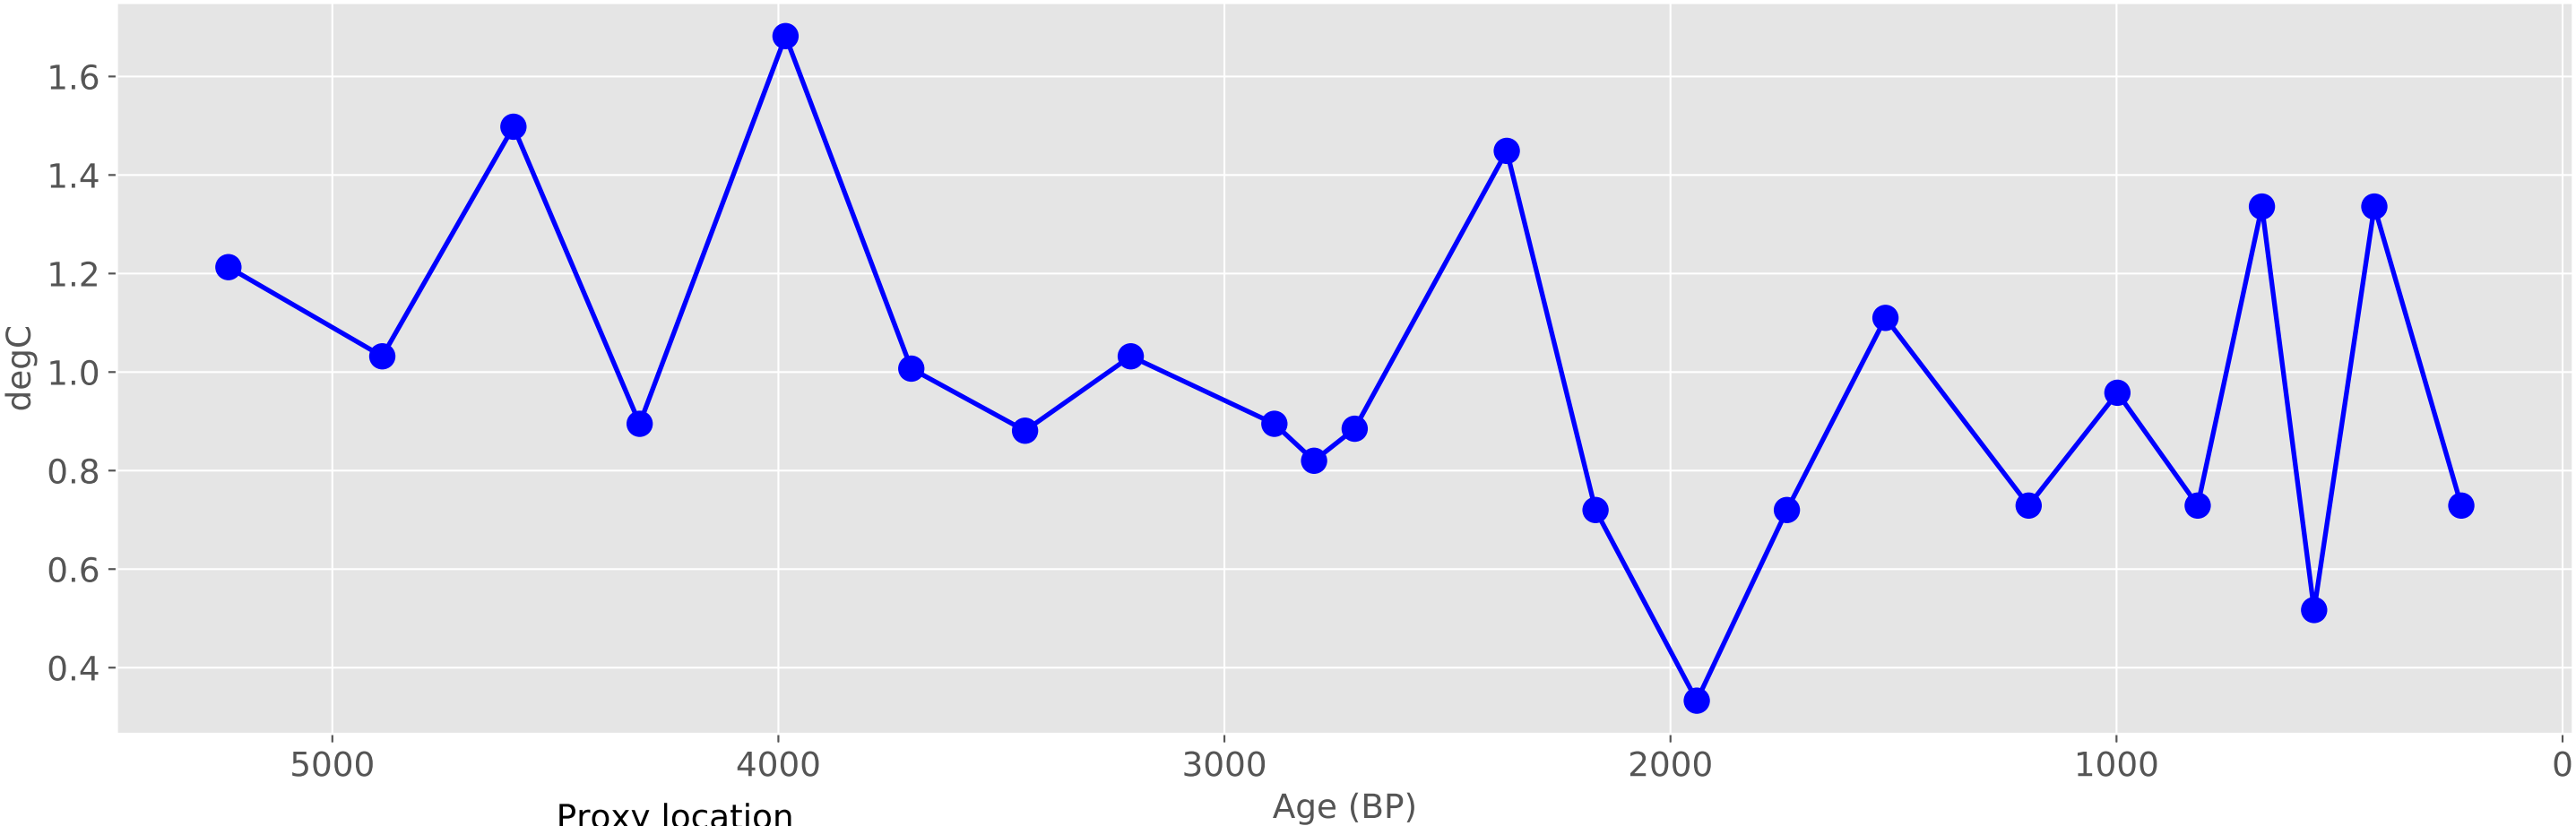

Proxy location  
(43.47 ° N, 109.96 ° W)



|                    |                                                       |
|--------------------|-------------------------------------------------------|
| Dataset name:      | ParkPond1.Lynch.1998                                  |
| Archive type:      | LakeSediment                                          |
| Proxy type:        | pollen                                                |
| Variable name:     | temperature                                           |
| Latitude ( ° N):   | 43.47                                                 |
| Longitude ( ° E):  | -109.96                                               |
| Elevation (m):     | 2705.0                                                |
| Interp. variable:  | T                                                     |
| Interp. detail:    | air@surface                                           |
| Interp. season:    | annual                                                |
| Interp. direction: | positive                                              |
| Pub. 1 title:      | Origin of a park-forest vegetation mosaic in the W... |
| Pub. 1 authors:    | Lynch, Elizabeth A.                                   |
| Pub. 1 year:       | 1998                                                  |
| Pub. 1 DOI:        | 10.1890/0012-9658(1998)079[1320:OOAPFV]2.0.CO;2       |
| Original data URL: | www.ncdc.noaa.gov/paleo/study/27330                   |

Proxy data and metadata  
LakeSediment | pollen | Rapid.Fall.1994 | M2L6aaquiz9P

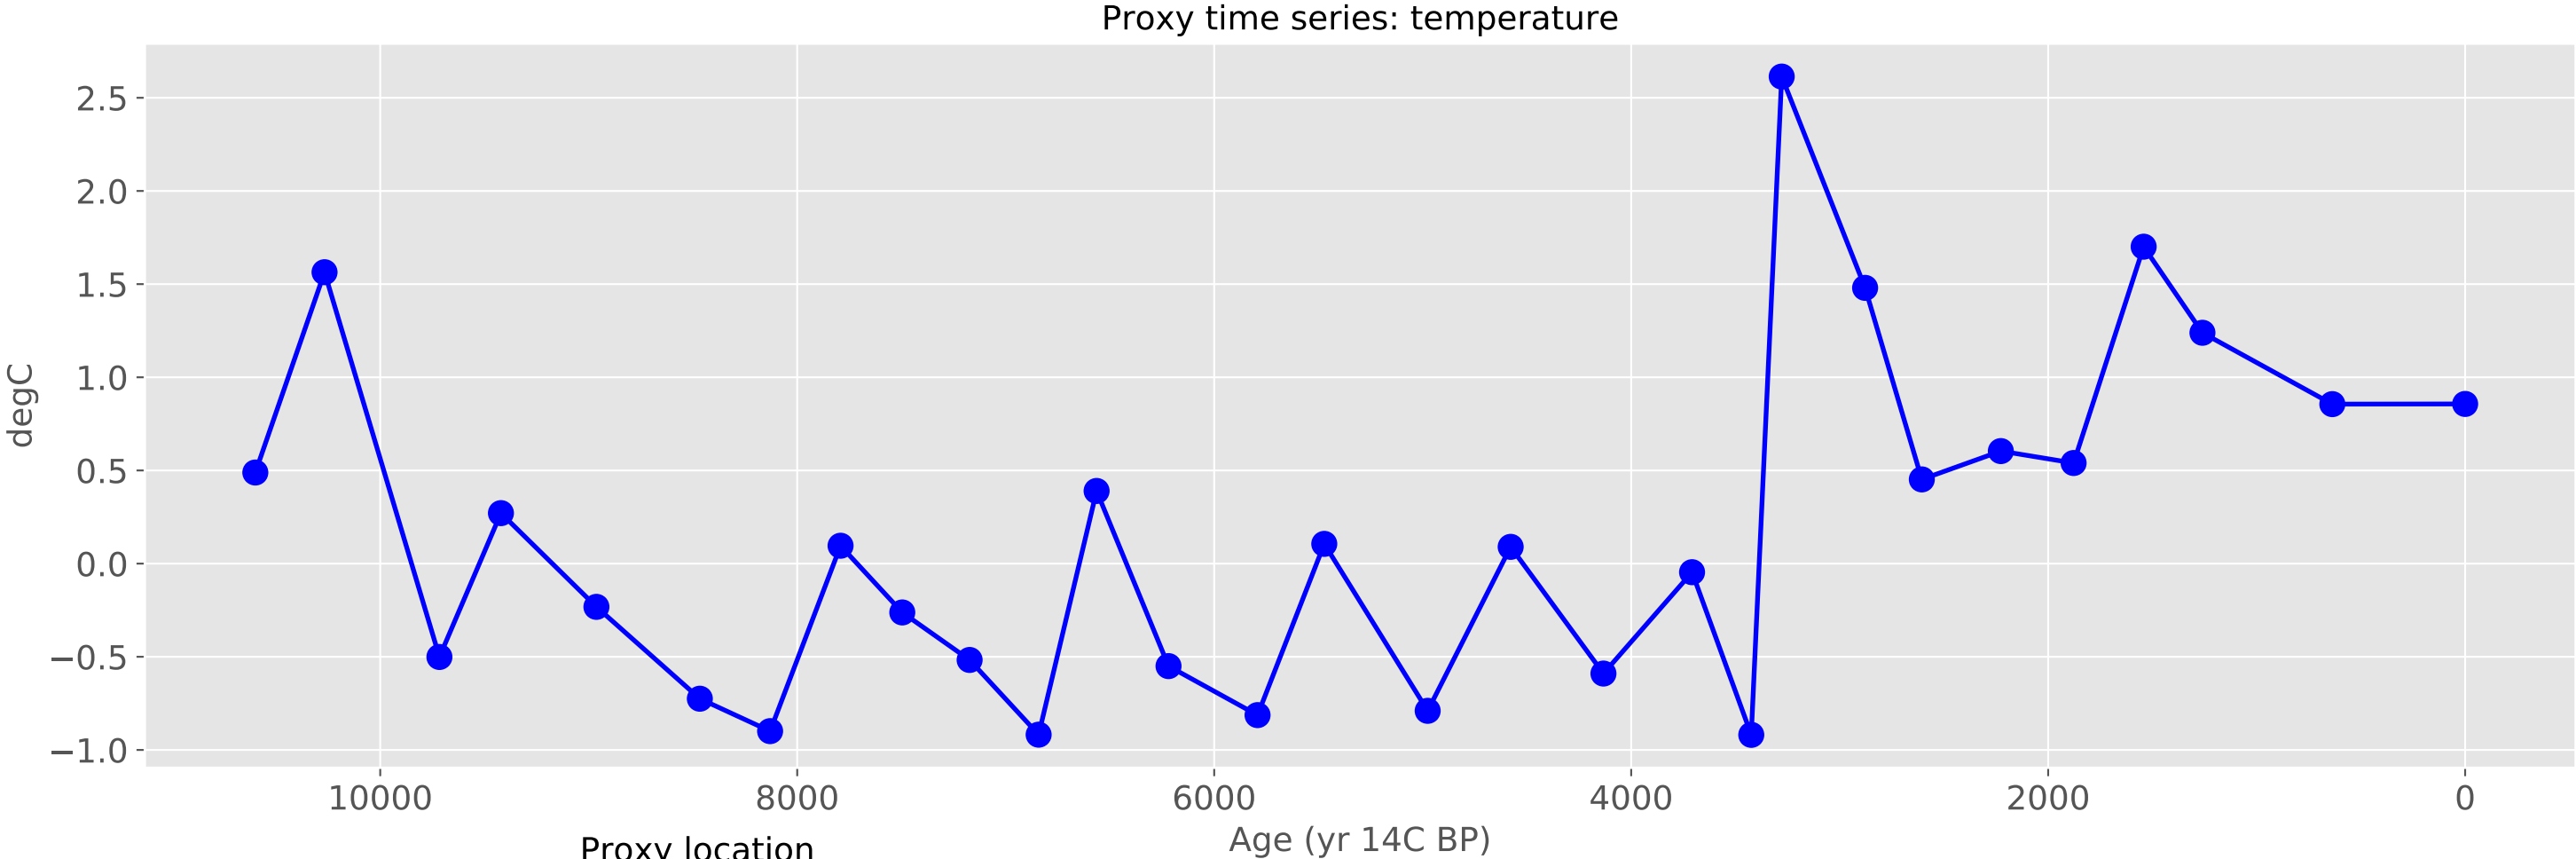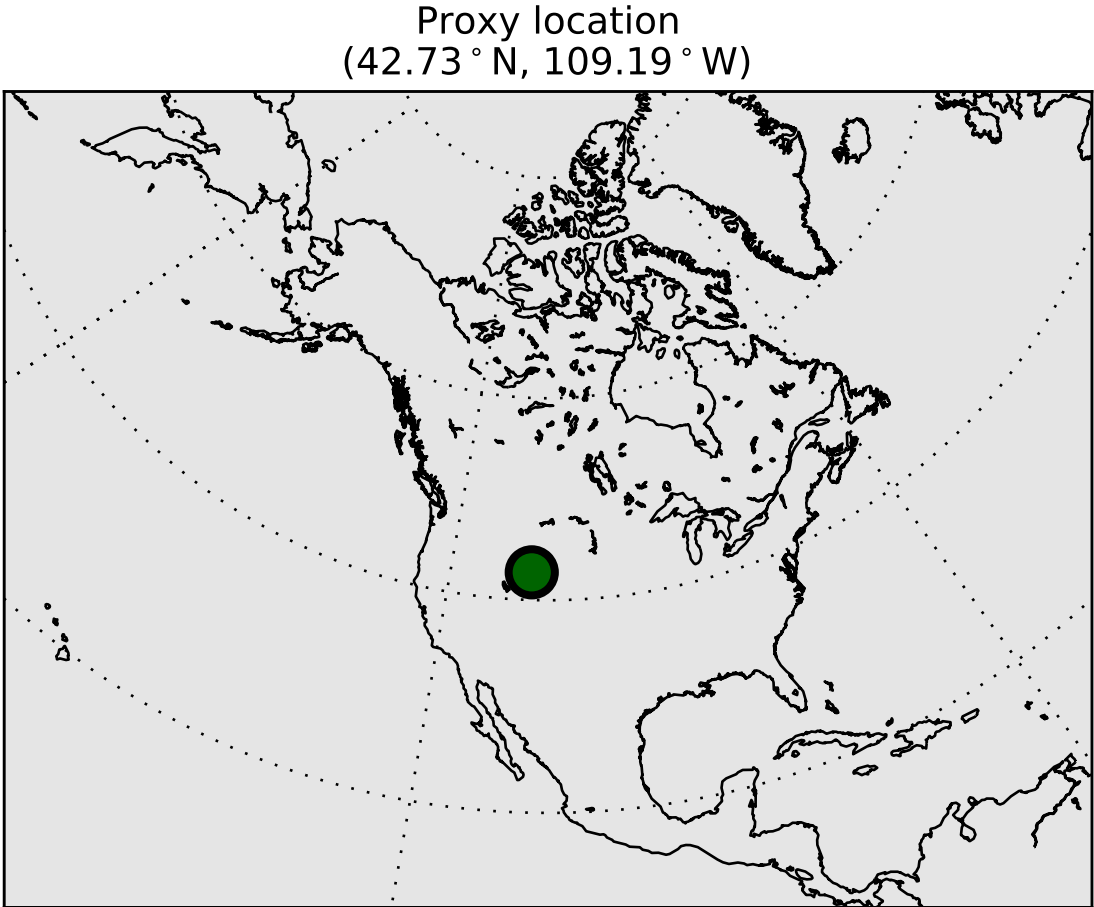

|                    |                                                       |
|--------------------|-------------------------------------------------------|
| Dataset name:      | Rapid.Fall.1994                                       |
| Archive type:      | LakeSediment                                          |
| Proxy type:        | pollen                                                |
| Variable name:     | temperature                                           |
| Latitude ( ° N):   | 42.73                                                 |
| Longitude ( ° E):  | -109.19                                               |
| Elevation (m):     | 3134.0                                                |
| Interp. variable:  | T                                                     |
| Interp. detail:    | air@surface                                           |
| Interp. season:    | annual                                                |
| Interp. direction: | positive                                              |
| Pub. 1 title:      | Vegetation dynamics in the southern Rocky Mountain... |
| Pub. 1 authors:    | Fall, P.L.                                            |
| Pub. 1 year:       | 1988                                                  |
| Pub. 1 DOI:        | Fall, P.L. 1988. Vegetation dynamics in the southe... |
| Original data URL: | www.ncdc.noaa.gov/paleo/study/27330                   |

Proxy data and metadata  
LakeSediment | pollen | Rapid.Fall.1994 | M2Li3rwsbjdP

Proxy time series: temperature

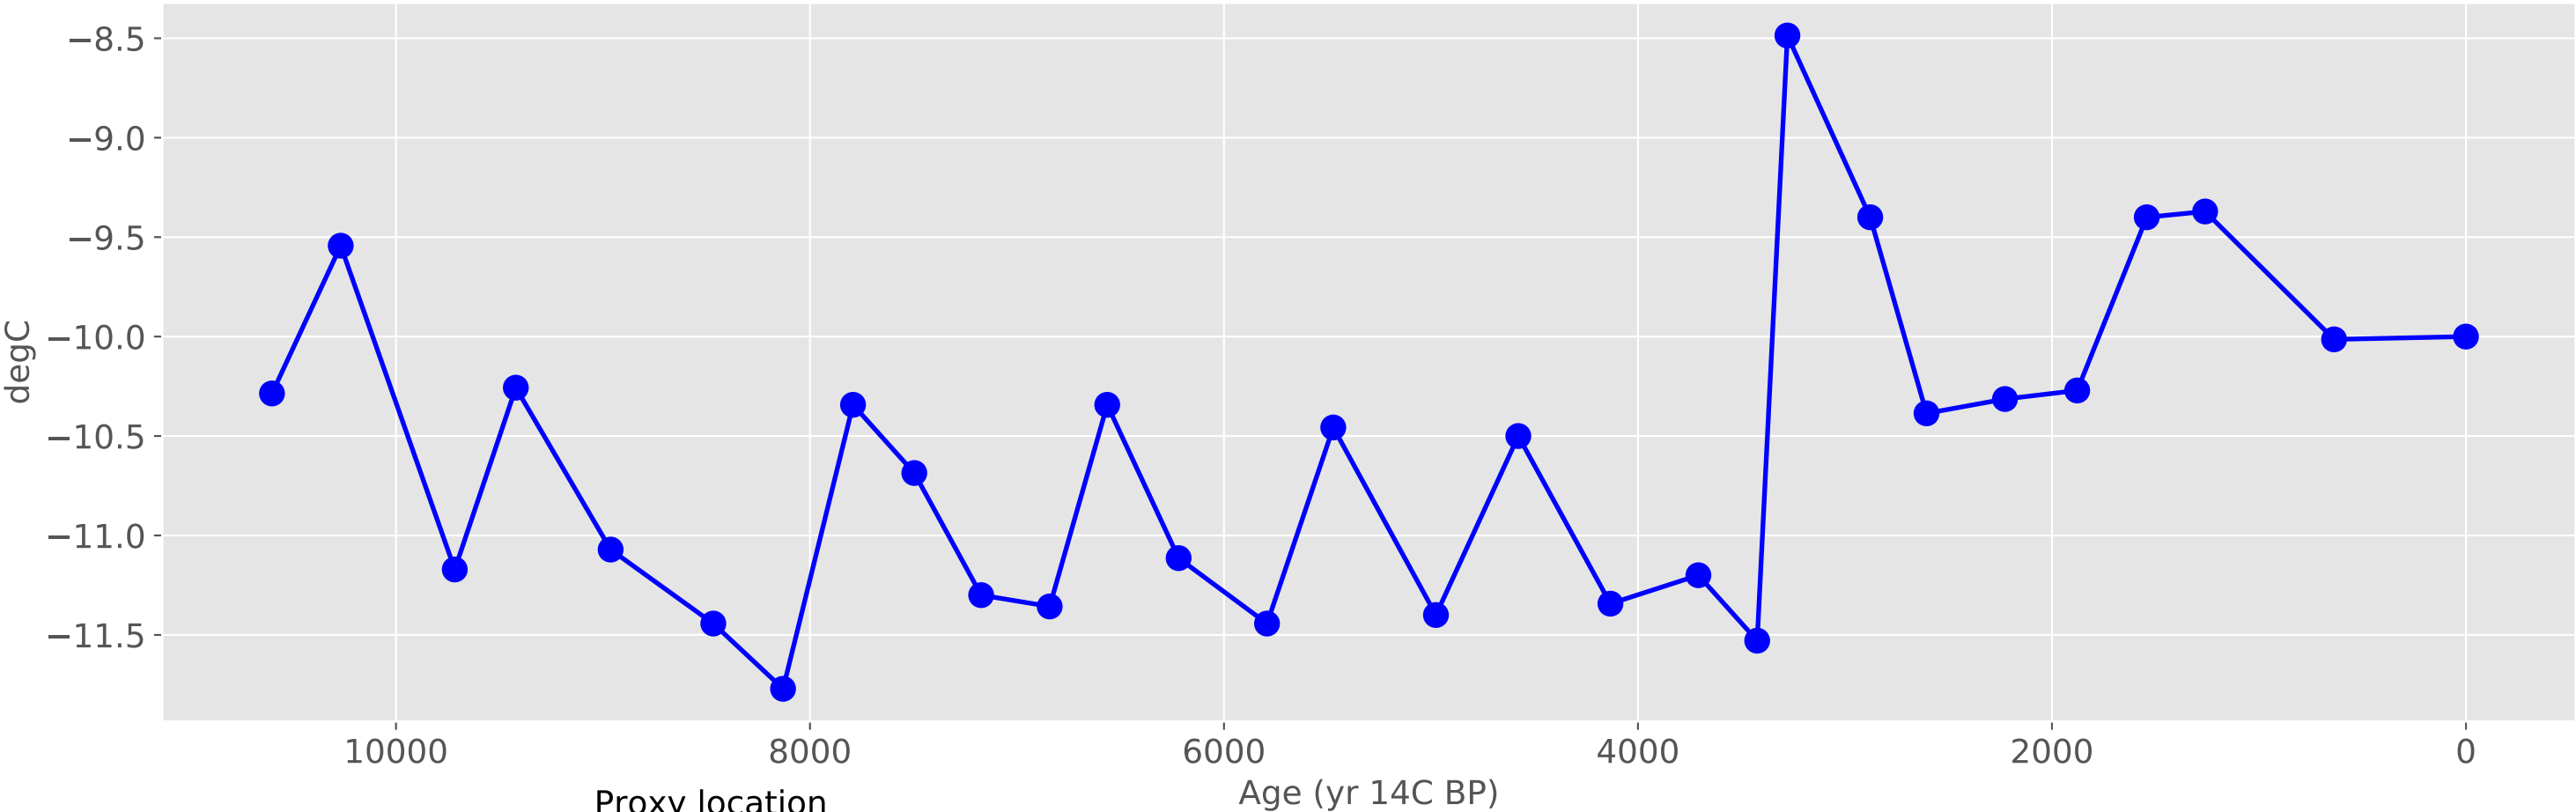

Proxy location  
(42.73 ° N, 109.19 ° W)

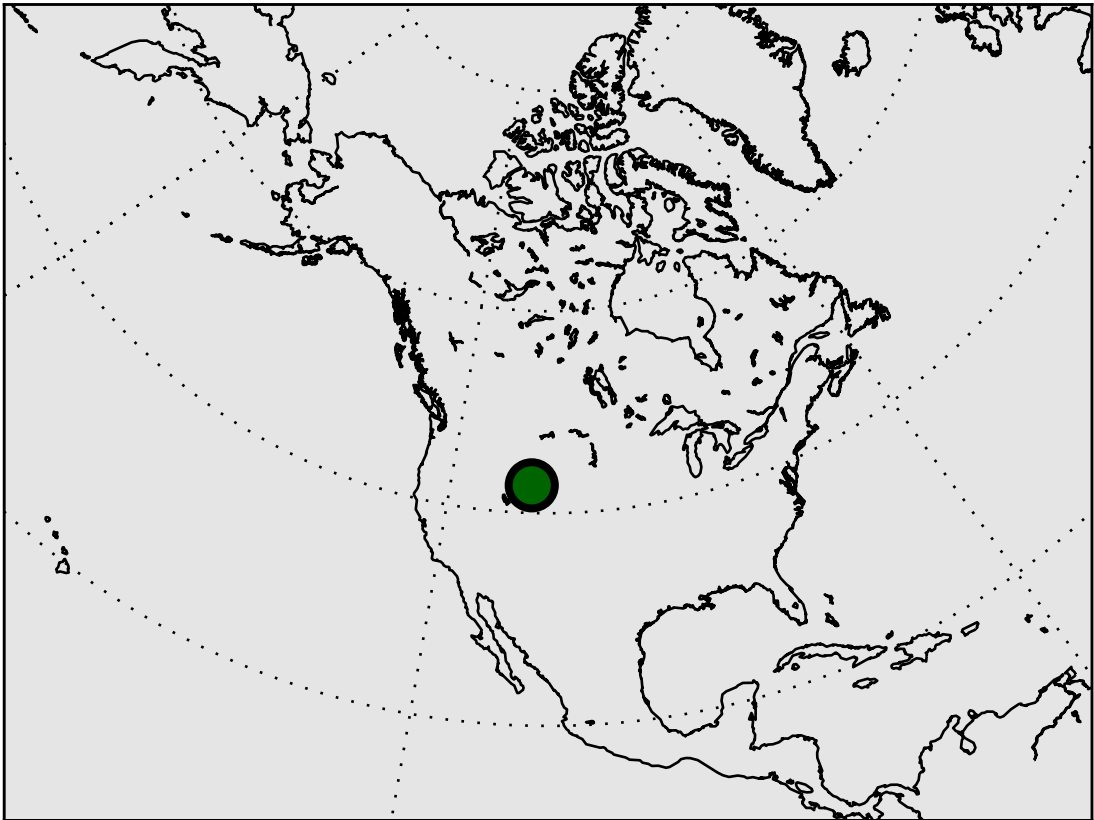

|                    |                                                       |
|--------------------|-------------------------------------------------------|
| Dataset name:      | Rapid.Fall.1994                                       |
| Archive type:      | LakeSediment                                          |
| Proxy type:        | pollen                                                |
| Variable name:     | temperature                                           |
| Latitude ( ° N):   | 42.73                                                 |
| Longitude ( ° E):  | -109.19                                               |
| Elevation (m):     | 3134.0                                                |
| Interp. variable:  | T                                                     |
| Interp. detail:    | air@surface                                           |
| Interp. season:    | winter+                                               |
| Interp. direction: | positive                                              |
| Pub. 1 title:      | Vegetation dynamics in the southern Rocky Mountain... |
| Pub. 1 authors:    | Fall, P.L.                                            |
| Pub. 1 year:       | 1988                                                  |
| Pub. 1 DOI:        | Fall, P.L. 1988. Vegetation dynamics in the southe... |
| Original data URL: | www.ncdc.noaa.gov/paleo/study/27330                   |

Proxy data and metadata  
LakeSediment | pollen | Rapid.Fall.1994 | M2LnhwqahwwP

Proxy time series: temperature

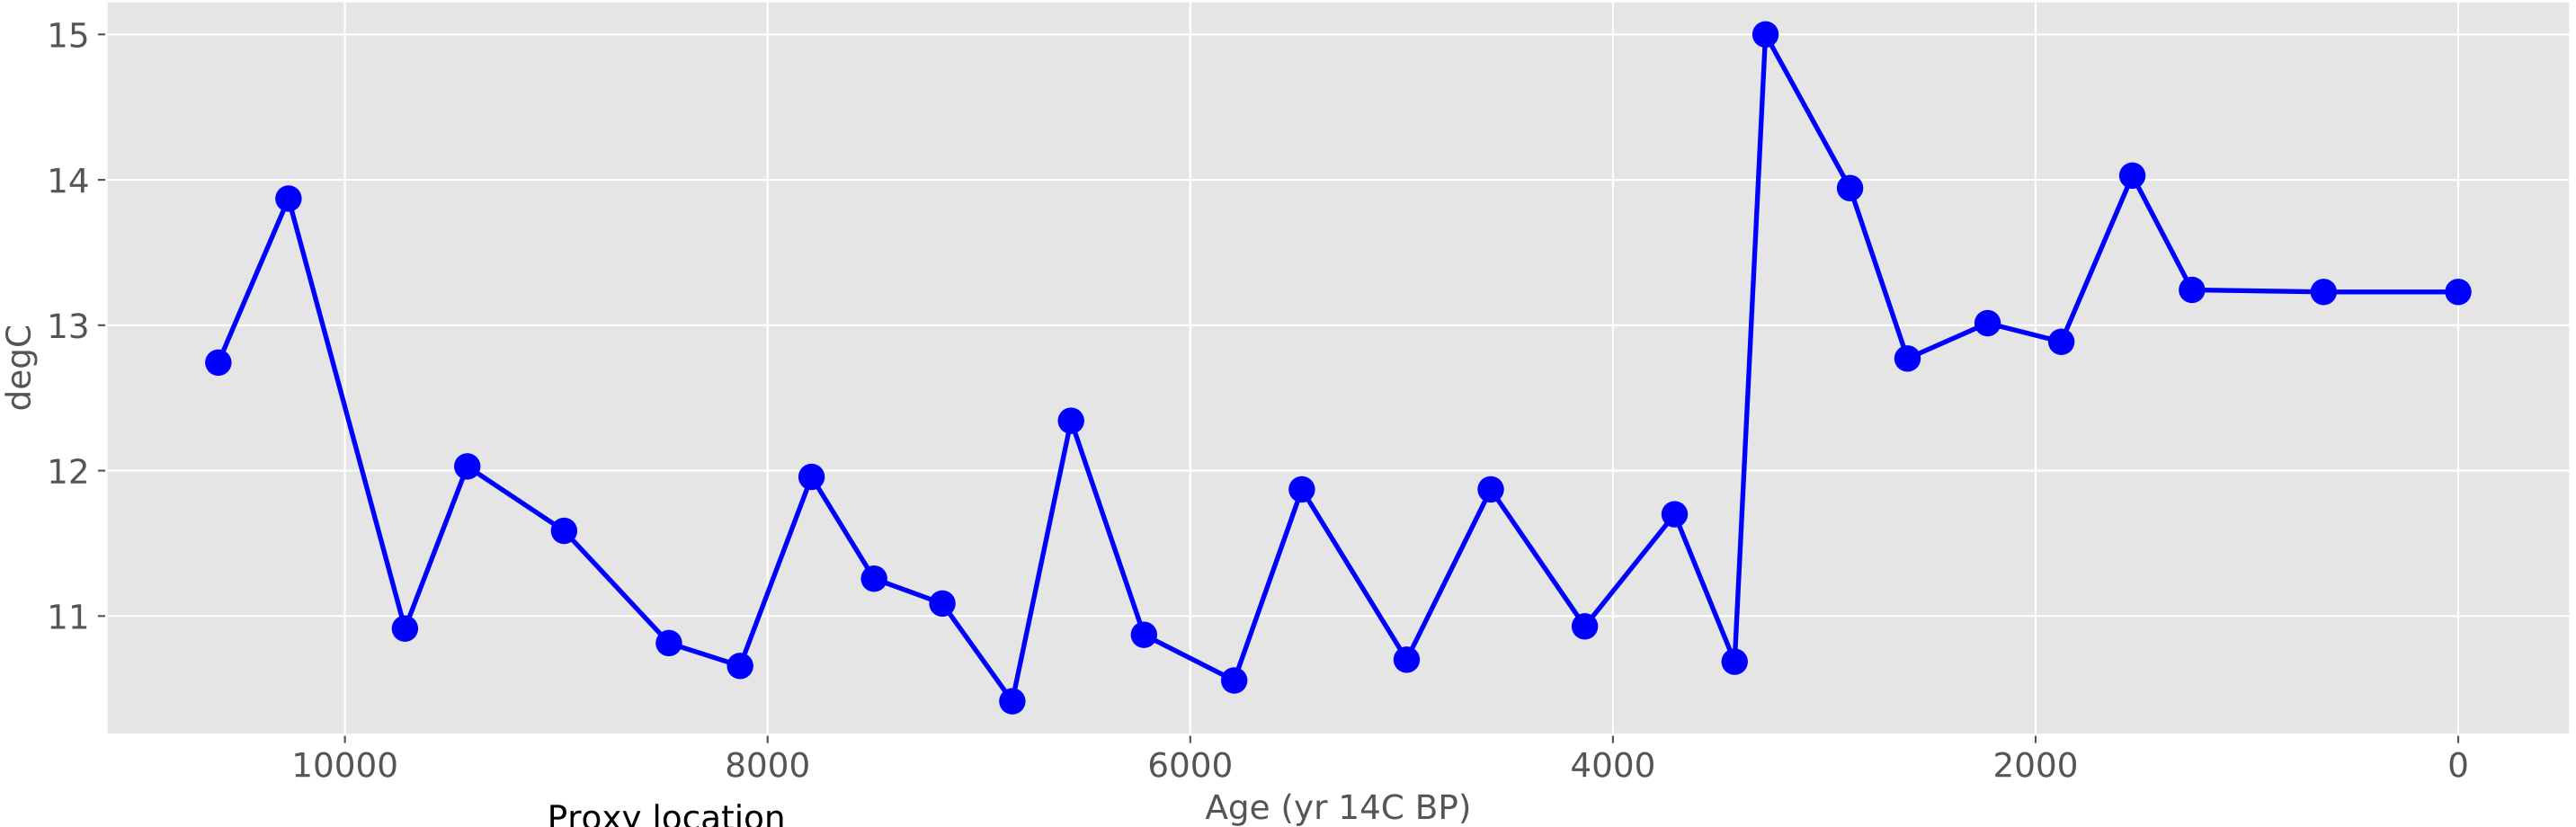

Proxy location  
(42.73 ° N, 109.19 ° W)



|                    |                                                       |
|--------------------|-------------------------------------------------------|
| Dataset name:      | Rapid.Fall.1994                                       |
| Archive type:      | LakeSediment                                          |
| Proxy type:        | pollen                                                |
| Variable name:     | temperature                                           |
| Latitude ( ° N):   | 42.73                                                 |
| Longitude ( ° E):  | -109.19                                               |
| Elevation (m):     | 3134.0                                                |
| Interp. variable:  | T                                                     |
| Interp. detail:    | air@surface                                           |
| Interp. season:    | summer+                                               |
| Interp. direction: | positive                                              |
| Pub. 1 title:      | Vegetation dynamics in the southern Rocky Mountain... |
| Pub. 1 authors:    | Fall, P.L.                                            |
| Pub. 1 year:       | 1988                                                  |
| Pub. 1 DOI:        | Fall, P.L. 1988. Vegetation dynamics in the southe... |
| Original data URL: | www.ncdc.noaa.gov/paleo/study/27330                   |

Proxy data and metadata  
LakeSediment | pollen | Rapid.Fall.1994 | M2Lnx2n0qghP

Proxy time series: precipitation

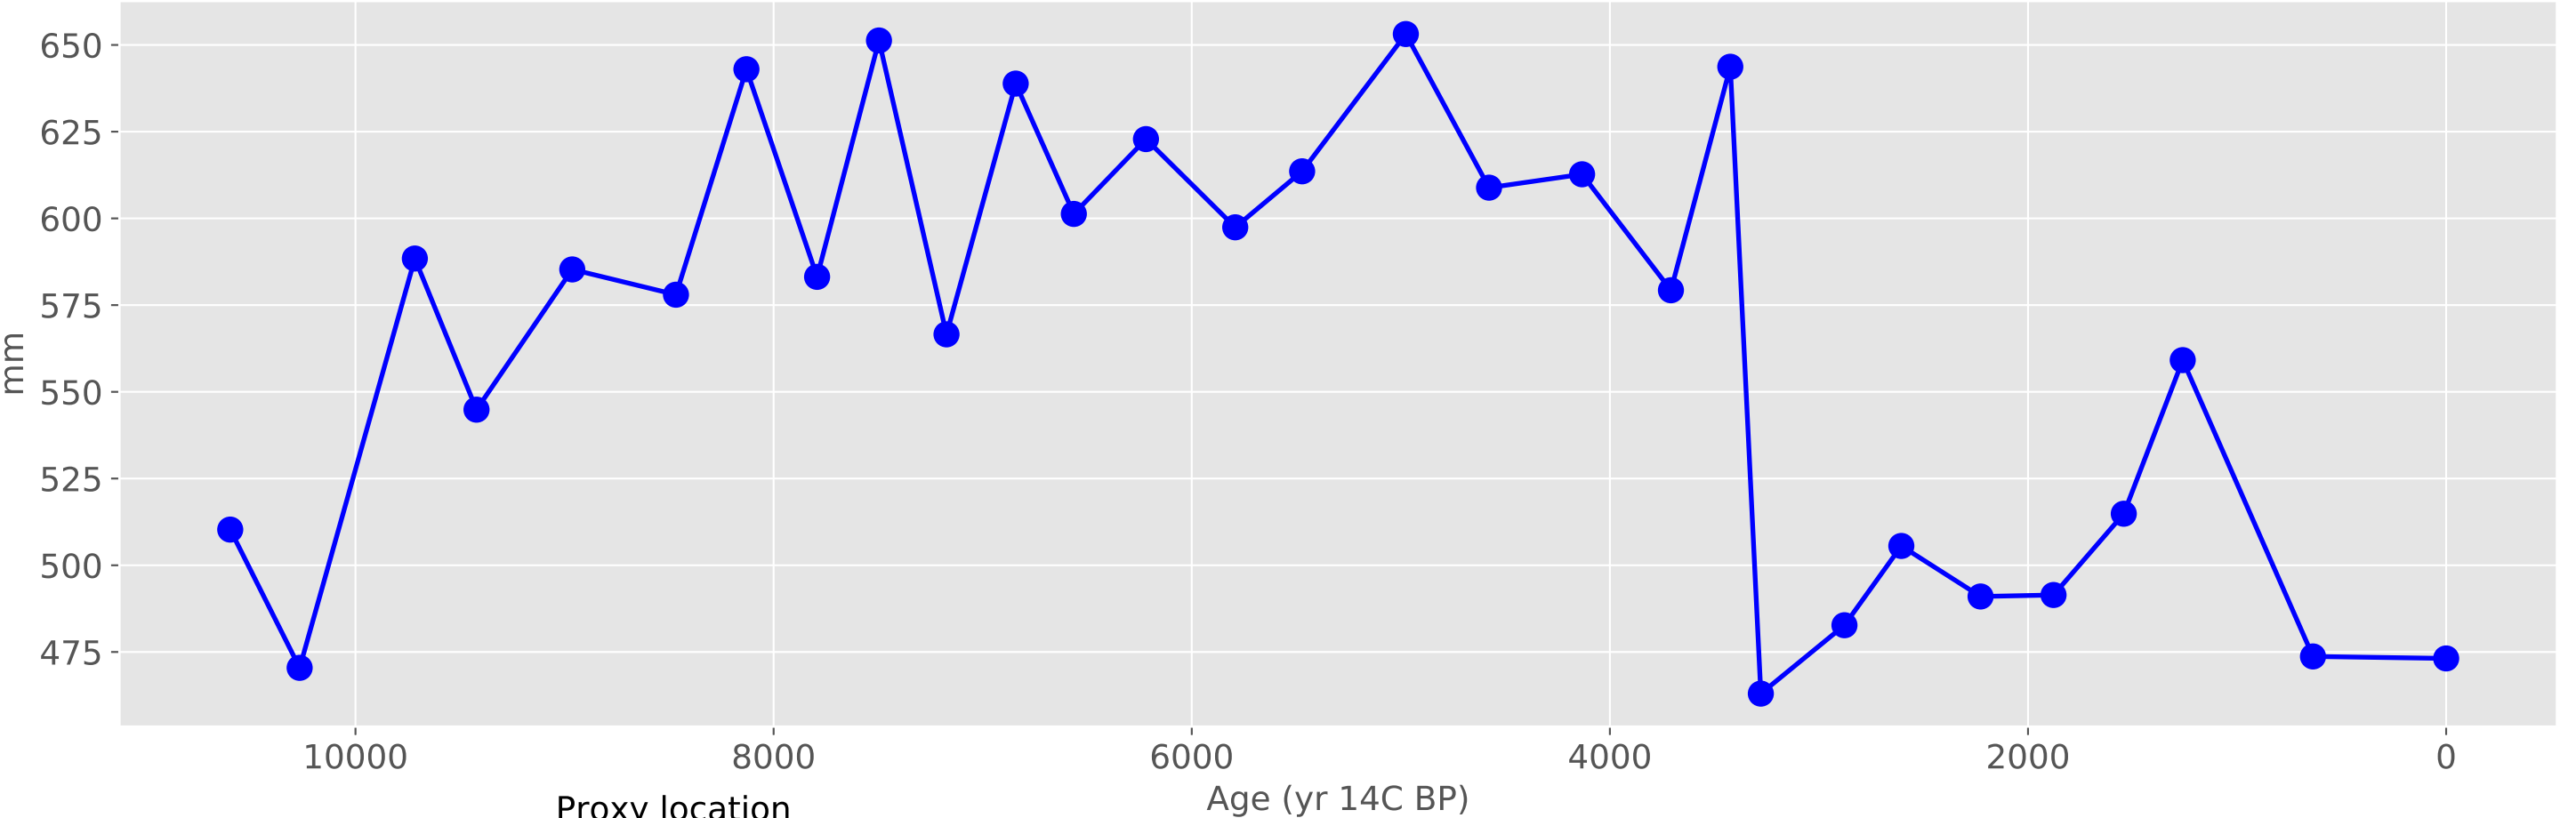

Proxy location  
(42.73 ° N, 109.19 ° W)

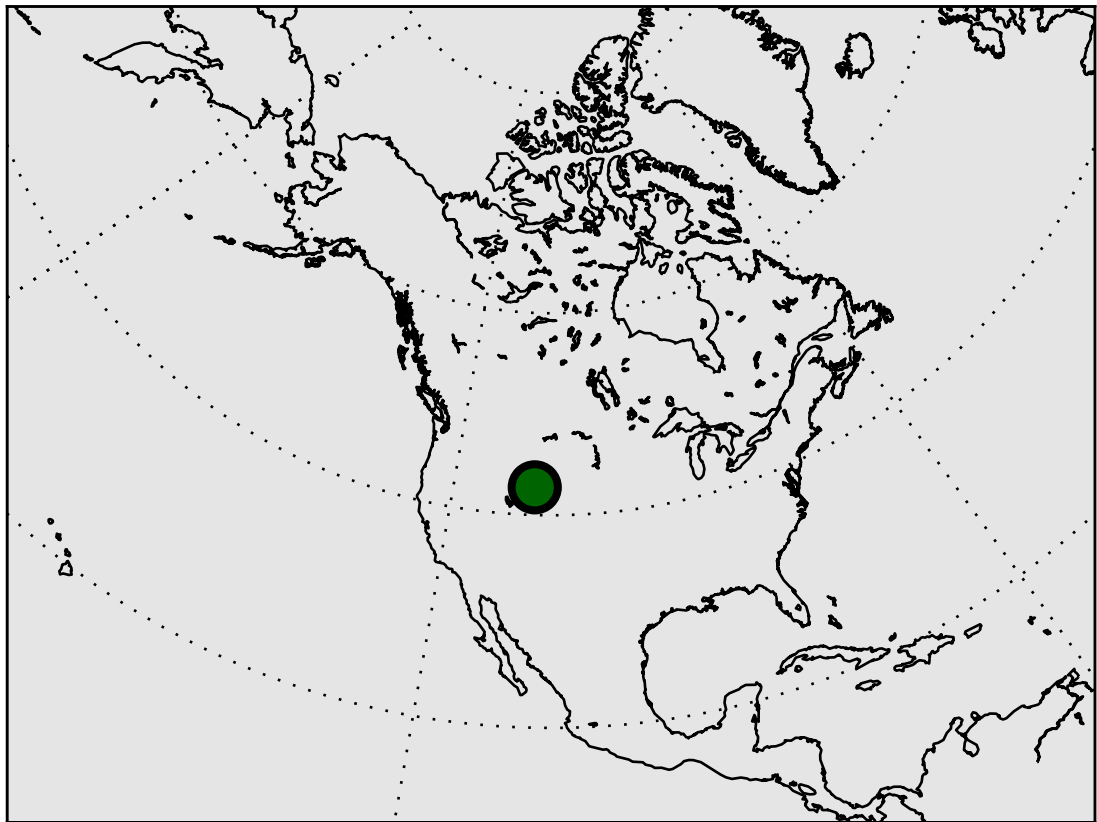

|                    |                                                                                              |
|--------------------|----------------------------------------------------------------------------------------------|
| Dataset name:      | Rapid.Fall.1994                                                                              |
| Archive type:      | LakeSediment                                                                                 |
| Proxy type:        | pollen                                                                                       |
| Variable name:     | precipitation                                                                                |
| Latitude ( ° N):   | 42.73                                                                                        |
| Longitude ( ° E):  | -109.19                                                                                      |
| Elevation (m):     | 3134.0                                                                                       |
| Interp. variable:  | P                                                                                            |
| Interp. detail:    | amount@surface                                                                               |
| Interp. season:    | annual                                                                                       |
| Interp. direction: | positive                                                                                     |
| Pub. 1 title:      | Vegetation dynamics in the southern Rocky Mountain...                                        |
| Pub. 1 authors:    | Fall, P.L.                                                                                   |
| Pub. 1 year:       | 1988                                                                                         |
| Pub. 1 DOI:        | Fall, P.L. 1988. Vegetation dynamics in the southe...                                        |
| Original data URL: | <a href="http://www.ncdc.noaa.gov/paleo/study/27330">www.ncdc.noaa.gov/paleo/study/27330</a> |



Proxy data and metadata

LakeSediment | pollen | TiagoLake.Jimenez-Moreno.2011 | WEB226460c3

Proxy time series: Pinus/Artemisia

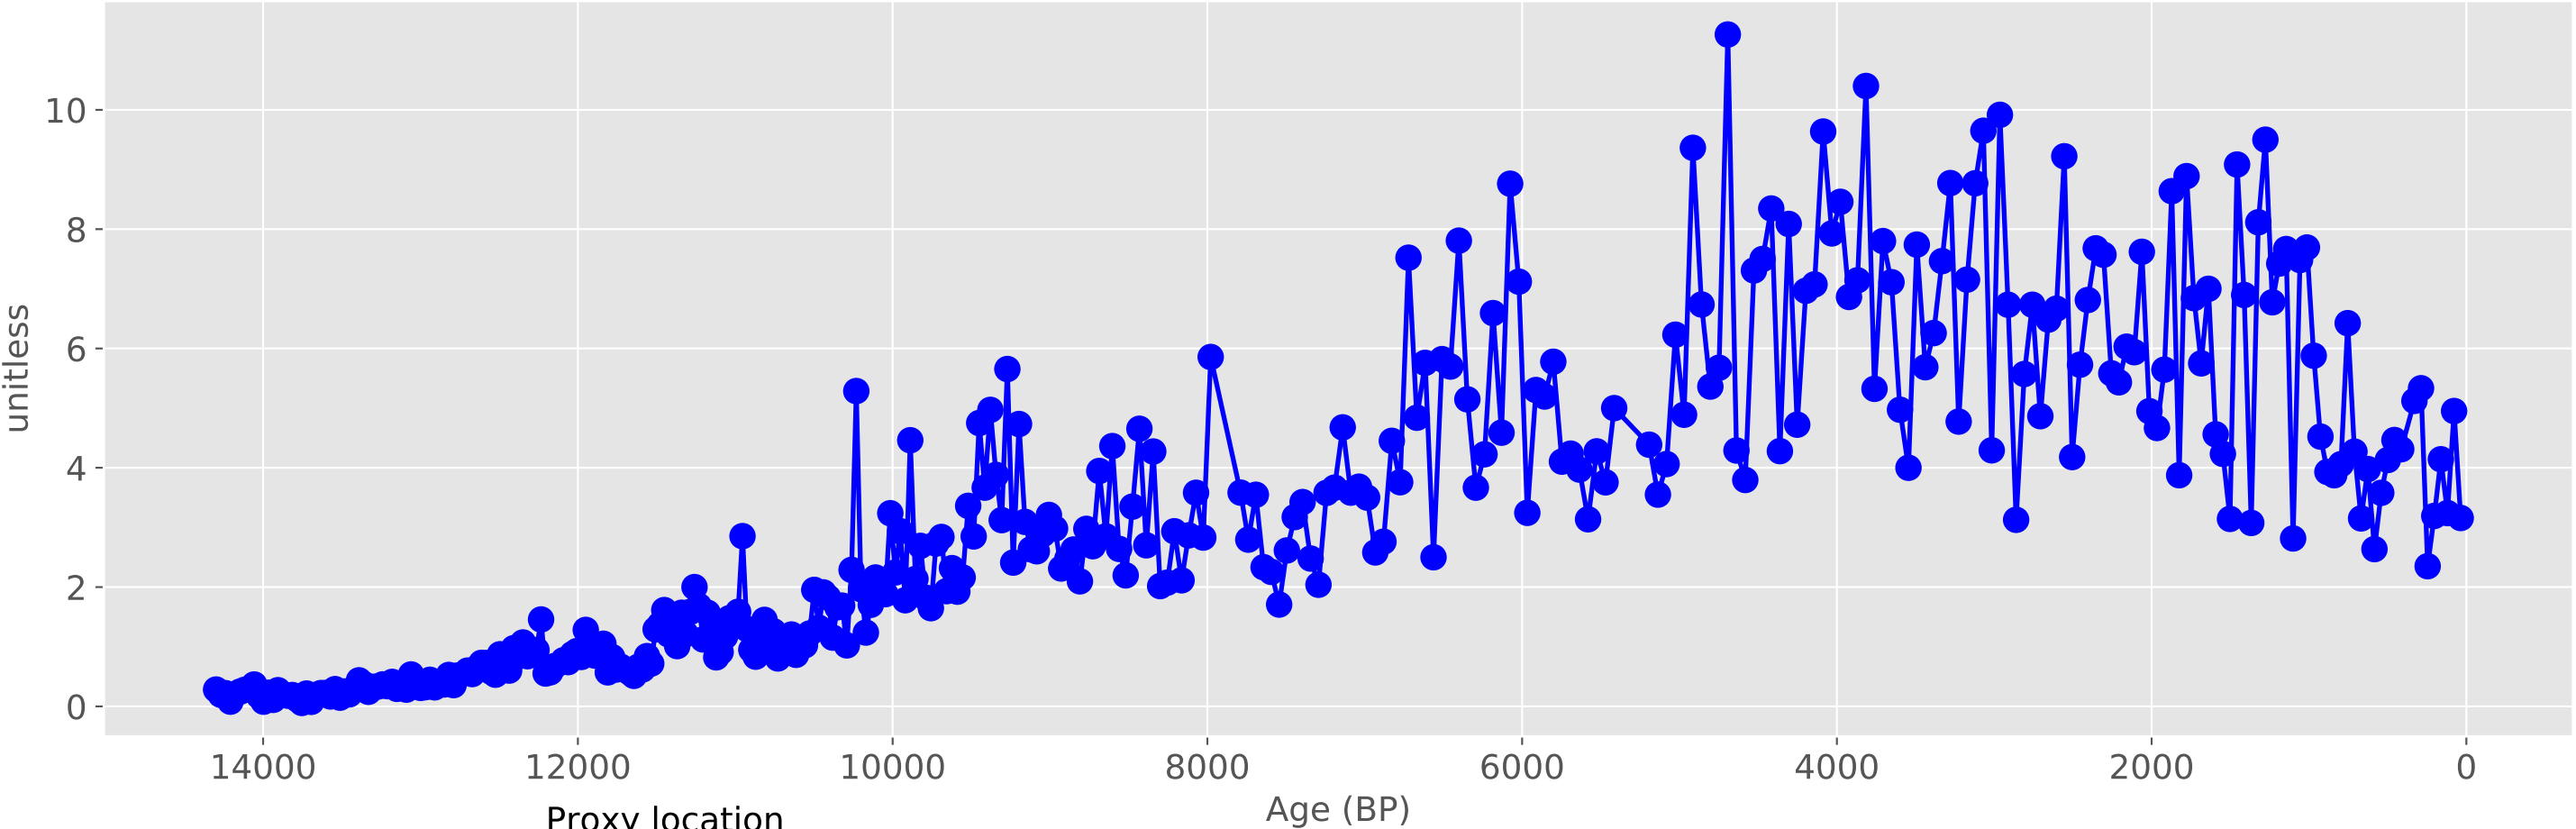

Proxy location  
(40.58 ° N, 106.61 ° W)

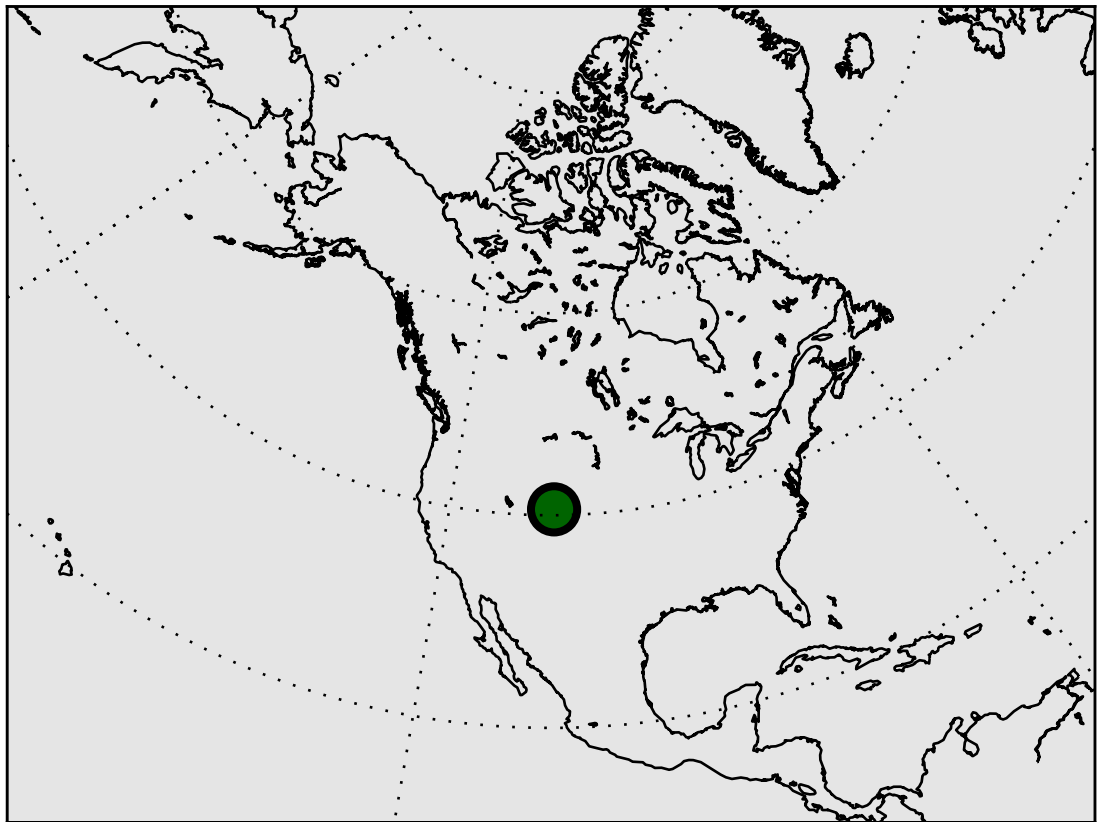

|                    |                                                       |
|--------------------|-------------------------------------------------------|
| Dataset name:      | TiagoLake.Jimenez-Moreno.2011                         |
| Archive type:      | LakeSediment                                          |
| Proxy type:        | pollen                                                |
| Variable name:     | Pinus/Artemisia                                       |
| Latitude ( ° N):   | 40.5803                                               |
| Longitude ( ° E):  | -106.6128                                             |
| Elevation (m):     | 2700.0                                                |
| Interp. variable:  | T                                                     |
| Interp. detail:    | air@surface                                           |
| Interp. season:    | annual                                                |
| Interp. direction: | positive                                              |
| Pub. 1 title:      | A high-resolution record of climate, vegetation, a... |
| Pub. 1 authors:    | Jimenez-Moreno, G.;Anderson, R. S.;Atudorei, V.;To... |
| Pub. 1 year:       | 2011                                                  |
| Pub. 1 DOI:        | 10.1130/B30240.1                                      |
| Original data URL: | wNAm                                                  |

Proxy data and metadata  
LakeSediment | pollen | TiagoLake.Jimenez-Moreno.2011 | WEB94ff7521

Proxy time series: Picea/Artemisia

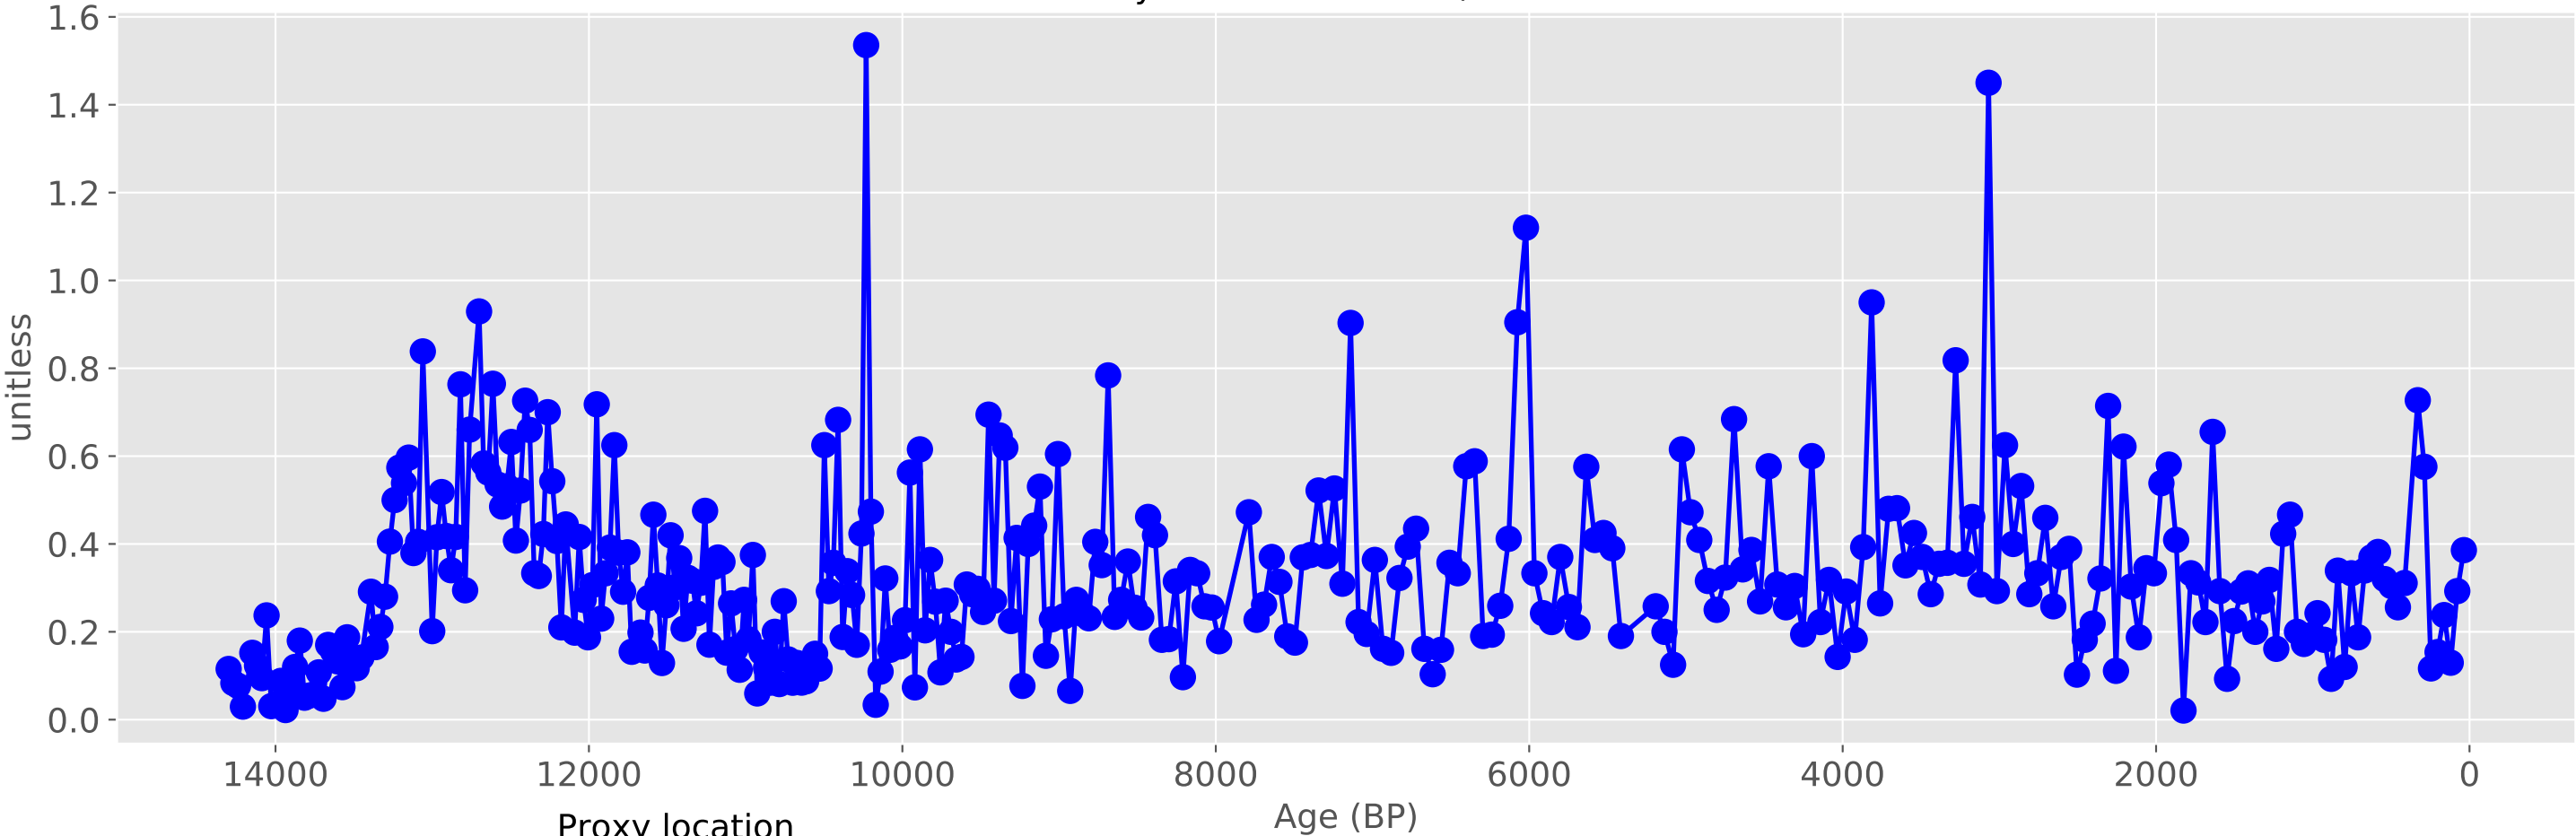

Proxy location  
(40.58 ° N, 106.61 ° W)



|                    |                                                       |
|--------------------|-------------------------------------------------------|
| Dataset name:      | TiagoLake.Jimenez-Moreno.2011                         |
| Archive type:      | LakeSediment                                          |
| Proxy type:        | pollen                                                |
| Variable name:     | Picea/Artemisia                                       |
| Latitude ( ° N):   | 40.5803                                               |
| Longitude ( ° E):  | -106.6128                                             |
| Elevation (m):     | 2700.0                                                |
| Interp. variable:  | T                                                     |
| Interp. detail:    | air@surface                                           |
| Interp. season:    | annual                                                |
| Interp. direction: | positive                                              |
| Pub. 1 title:      | A high-resolution record of climate, vegetation, a... |
| Pub. 1 authors:    | Jimenez-Moreno, G.;Anderson, R. S.;Atudorei, V.;To... |
| Pub. 1 year:       | 2011                                                  |
| Pub. 1 DOI:        | 10.1130/B30240.1                                      |
| Original data URL: | wNA                                                   |

Proxy data and metadata

LakeSediment | pollen | TiagoLake.Jimenez-Moreno.2011 | WEBcb757602

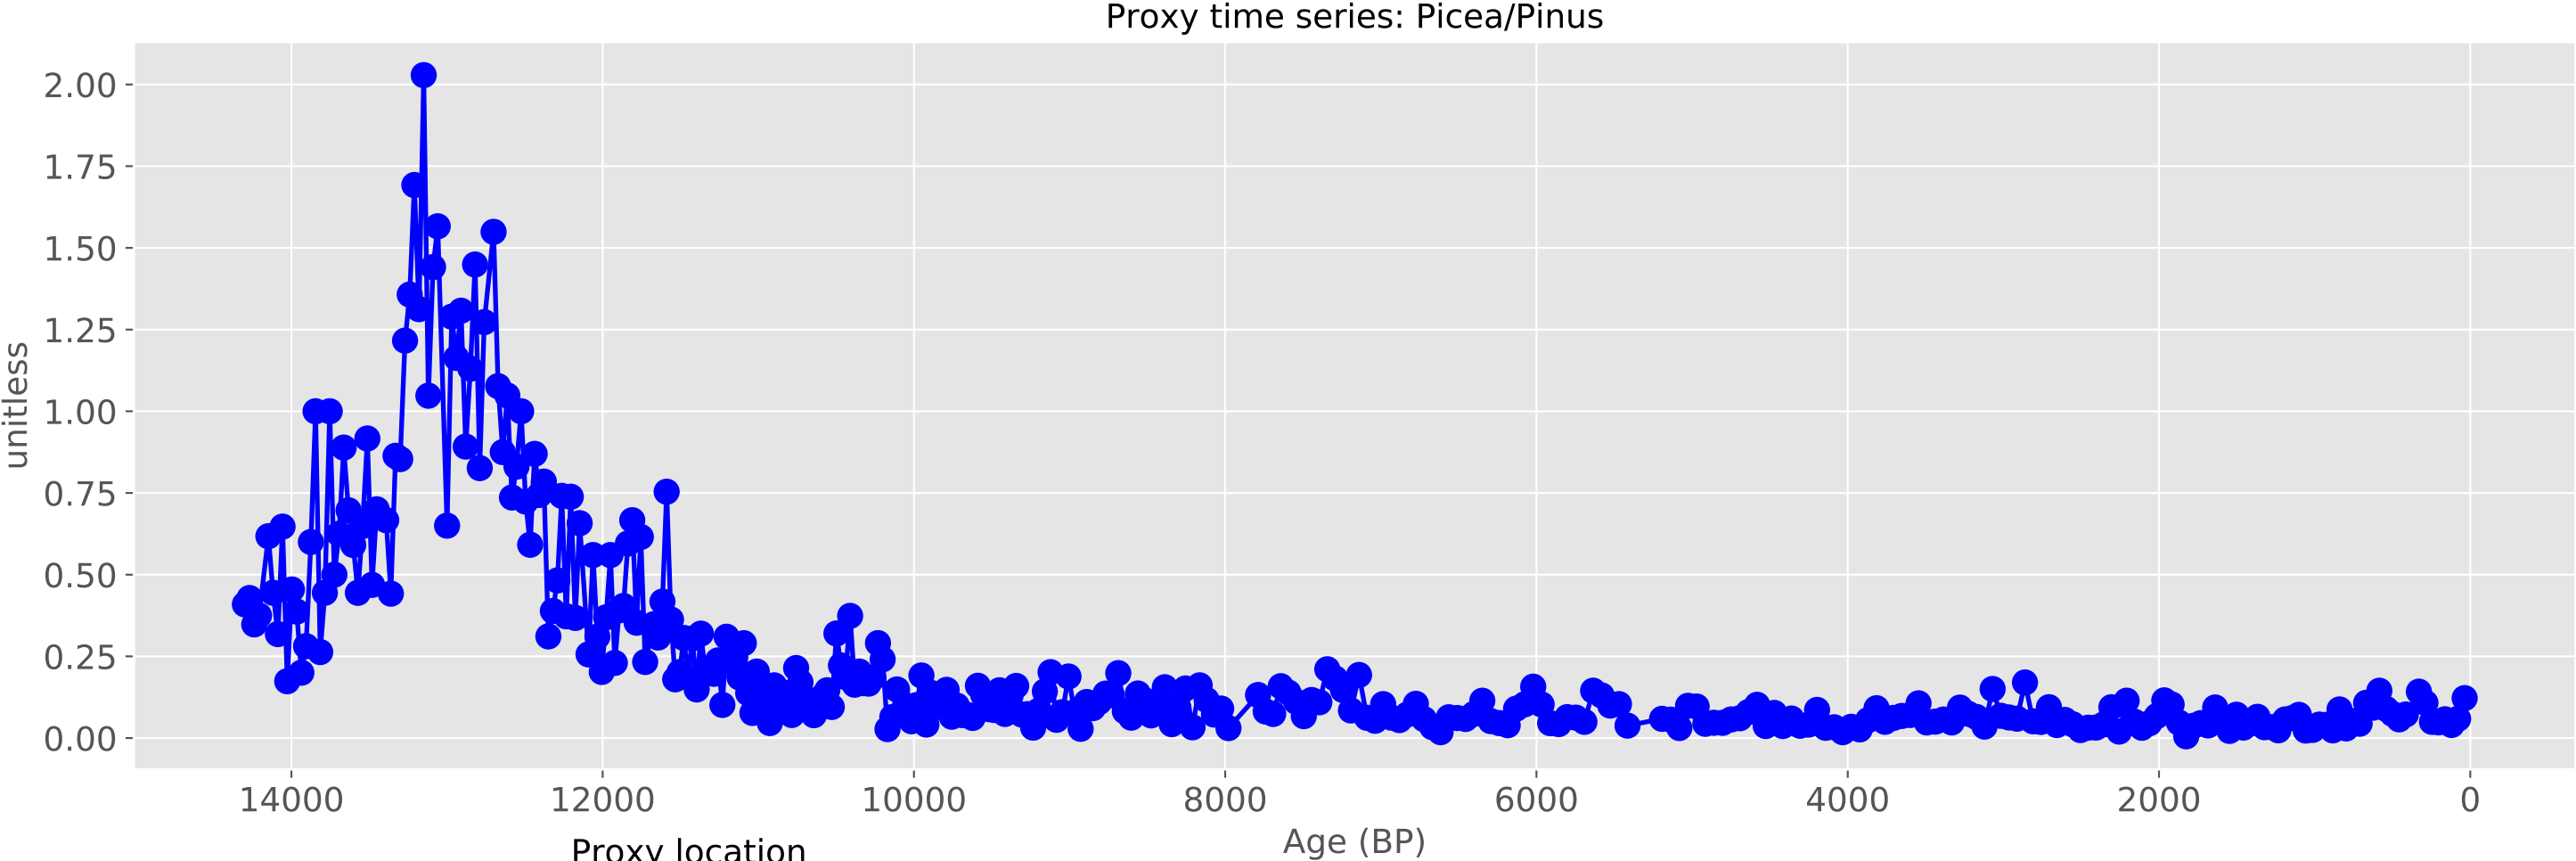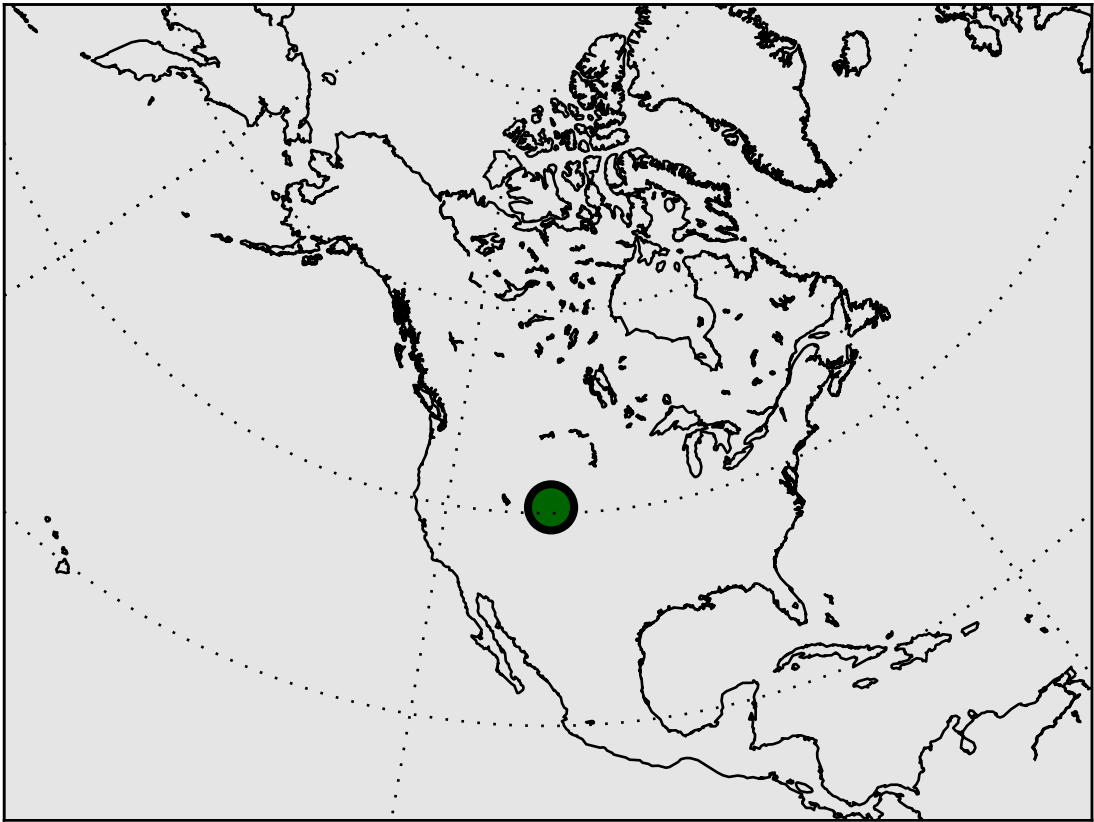

|                    |                                                       |
|--------------------|-------------------------------------------------------|
| Dataset name:      | TiagoLake.Jimenez-Moreno.2011                         |
| Archive type:      | LakeSediment                                          |
| Proxy type:        | pollen                                                |
| Variable name:     | Picea/Pinus                                           |
| Latitude ( ° N):   | 40.5803                                               |
| Longitude ( ° E):  | -106.6128                                             |
| Elevation (m):     | 2700.0                                                |
| Interp. variable:  | T                                                     |
| Interp. detail:    | air@surface                                           |
| Interp. season:    | annual                                                |
| Interp. direction: | positive                                              |
| Pub. 1 title:      | A high-resolution record of climate, vegetation, a... |
| Pub. 1 authors:    | Jimenez-Moreno, G.;Anderson, R. S.;Atudorei, V.;To... |
| Pub. 1 year:       | 2011                                                  |
| Pub. 1 DOI:        | 10.1130/B30240.1                                      |
| Original data URL: | wNAm                                                  |

Proxy data and metadata

LakeSediment | pollen | TiagoLake.Jimenez-Moreno.2011 | WEBE350f165

Proxy time series: Pinyon

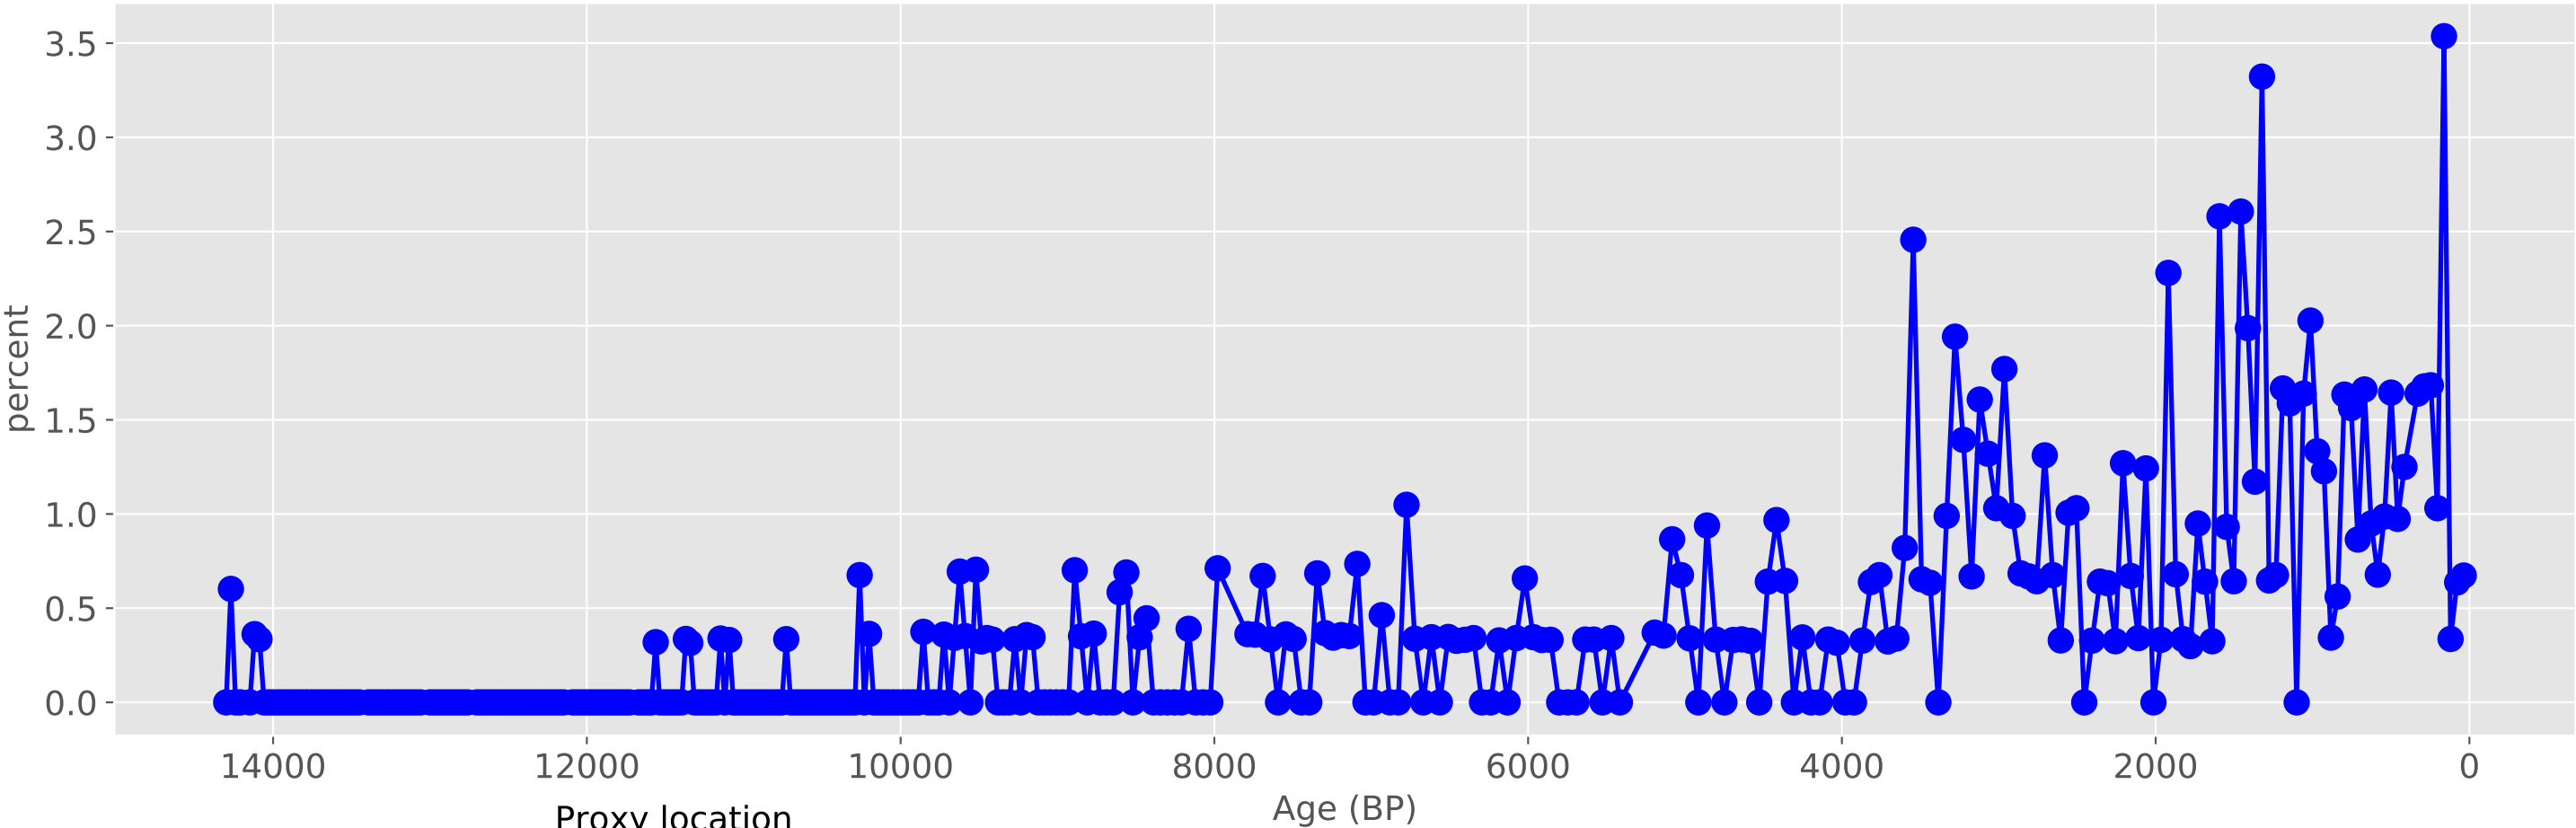

Proxy location  
(40.58 ° N, 106.61 ° W)



|                    |                                                       |
|--------------------|-------------------------------------------------------|
| Dataset name:      | TiagoLake.Jimenez-Moreno.2011                         |
| Archive type:      | LakeSediment                                          |
| Proxy type:        | pollen                                                |
| Variable name:     | Pinyon                                                |
| Latitude ( ° N):   | 40.5803                                               |
| Longitude ( ° E):  | -106.6128                                             |
| Elevation (m):     | 2700.0                                                |
| Interp. variable:  | P-E                                                   |
| Interp. detail:    | @surface                                              |
| Interp. season:    | winterOnly                                            |
| Interp. direction: | positive                                              |
| Pub. 1 title:      | A high-resolution record of climate, vegetation, a... |
| Pub. 1 authors:    | Jimenez-Moreno, G.;Anderson, R. S.;Atudorei, V.;To... |
| Pub. 1 year:       | 2011                                                  |
| Pub. 1 DOI:        | 10.1130/B30240.1                                      |
| Original data URL: | wNAm                                                  |

Proxy data and metadata  
LakeSediment | pollen | SchellingsBog.Barron.2004 | WEB62272ffc

Proxy time series: Quercus

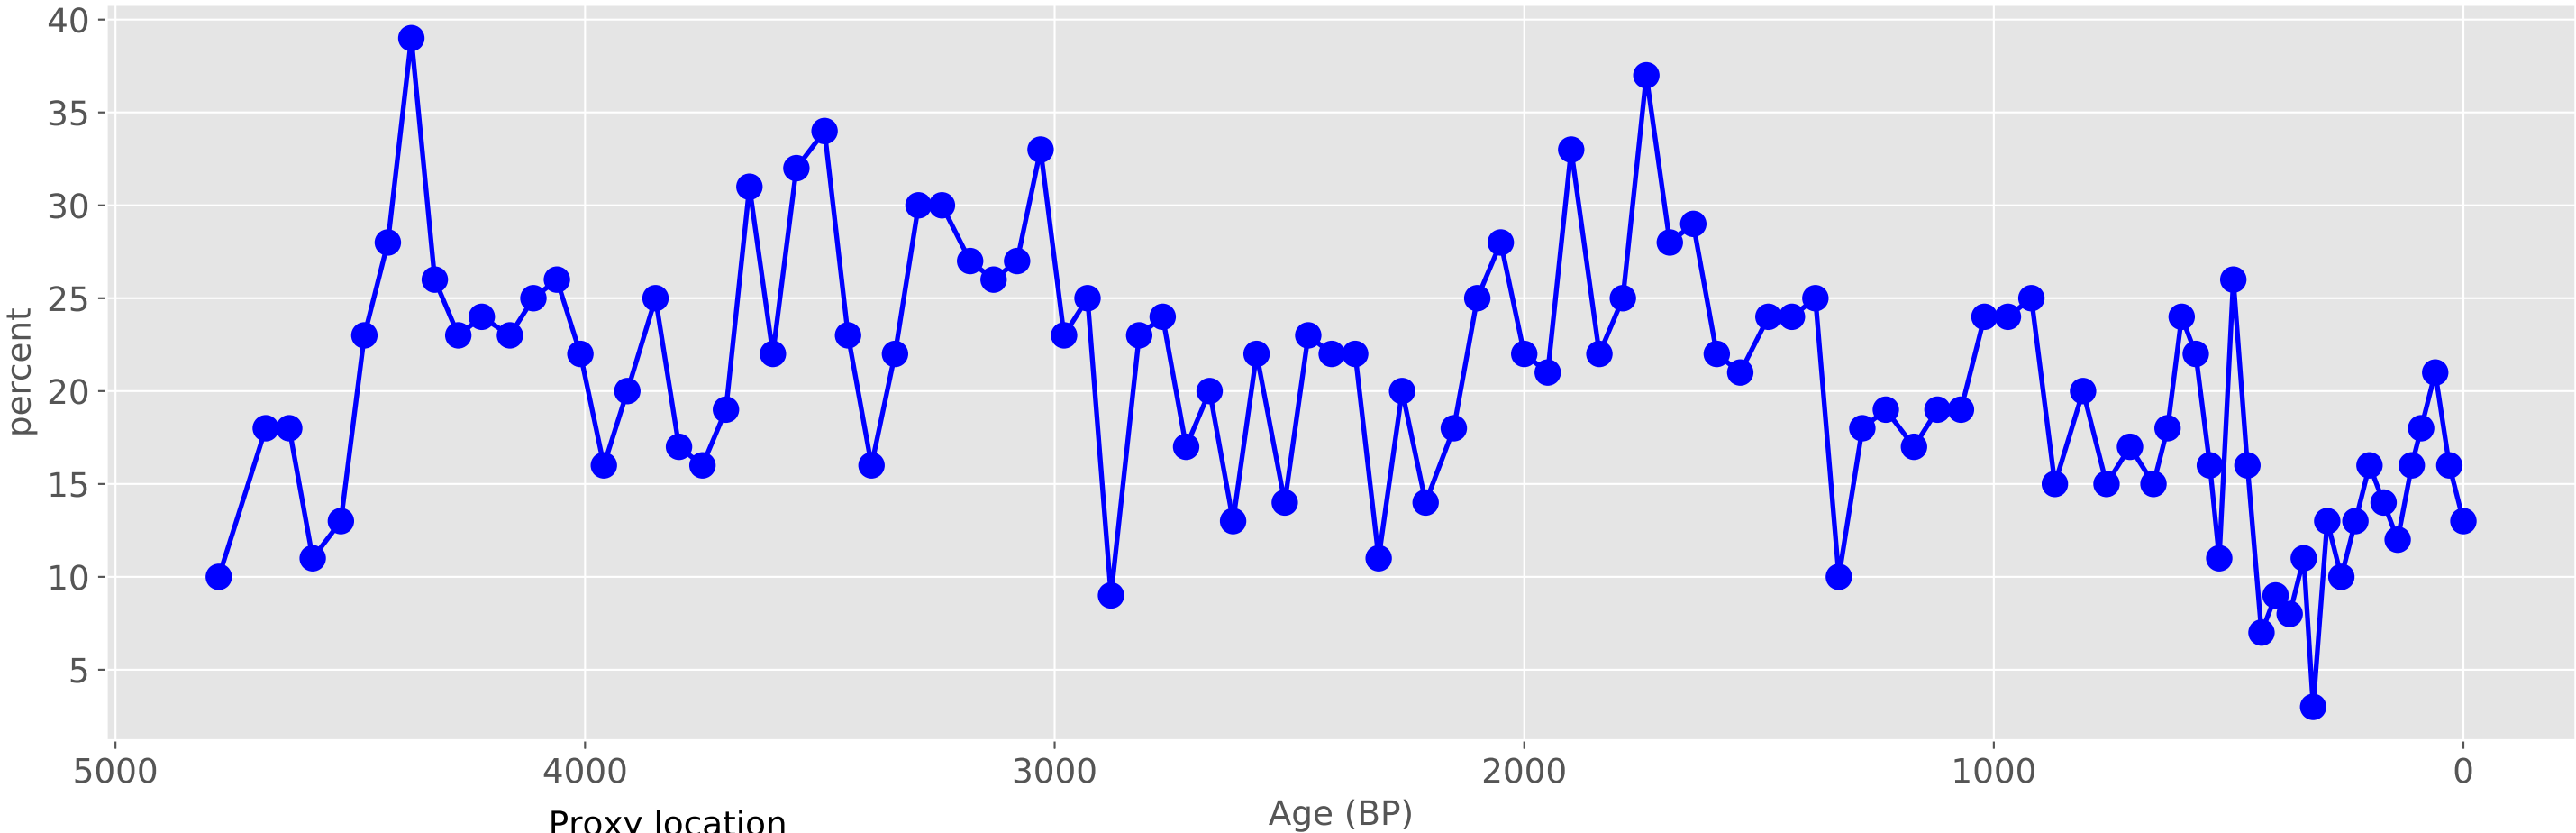

Proxy location  
(40.28 ° N, 123.36 ° W)

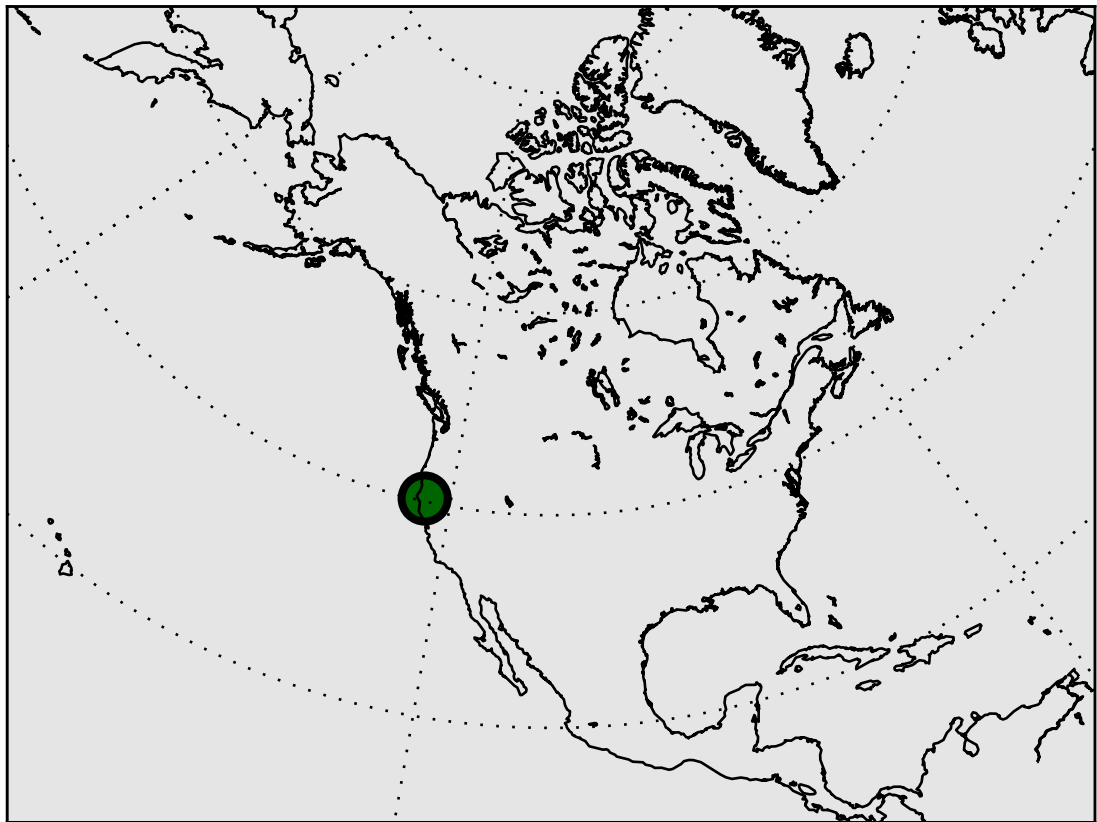

|                    |                                                       |
|--------------------|-------------------------------------------------------|
| Dataset name:      | SchellingsBog.Barron.2004                             |
| Archive type:      | LakeSediment                                          |
| Proxy type:        | pollen                                                |
| Variable name:     | Quercus                                               |
| Latitude ( ° N):   | 40.28                                                 |
| Longitude ( ° E):  | -123.36                                               |
| Elevation (m):     | 910.0                                                 |
| Interp. variable:  | P-E                                                   |
| Interp. detail:    | @surface                                              |
| Interp. season:    | annual                                                |
| Interp. direction: | positive                                              |
| Pub. 1 title:      | High resolution climate of the past 3,500 years of... |
| Pub. 1 authors:    |                                                       |
| Pub. 1 year:       | 2004                                                  |
| Pub. 1 DOI:        |                                                       |
| Original data URL: | wNAm                                                  |

Proxy data and metadata  
LakeSediment | pollen | SchellingsBog.Barron.2004 | WEBfde0ea8e

Proxy time series: Fir

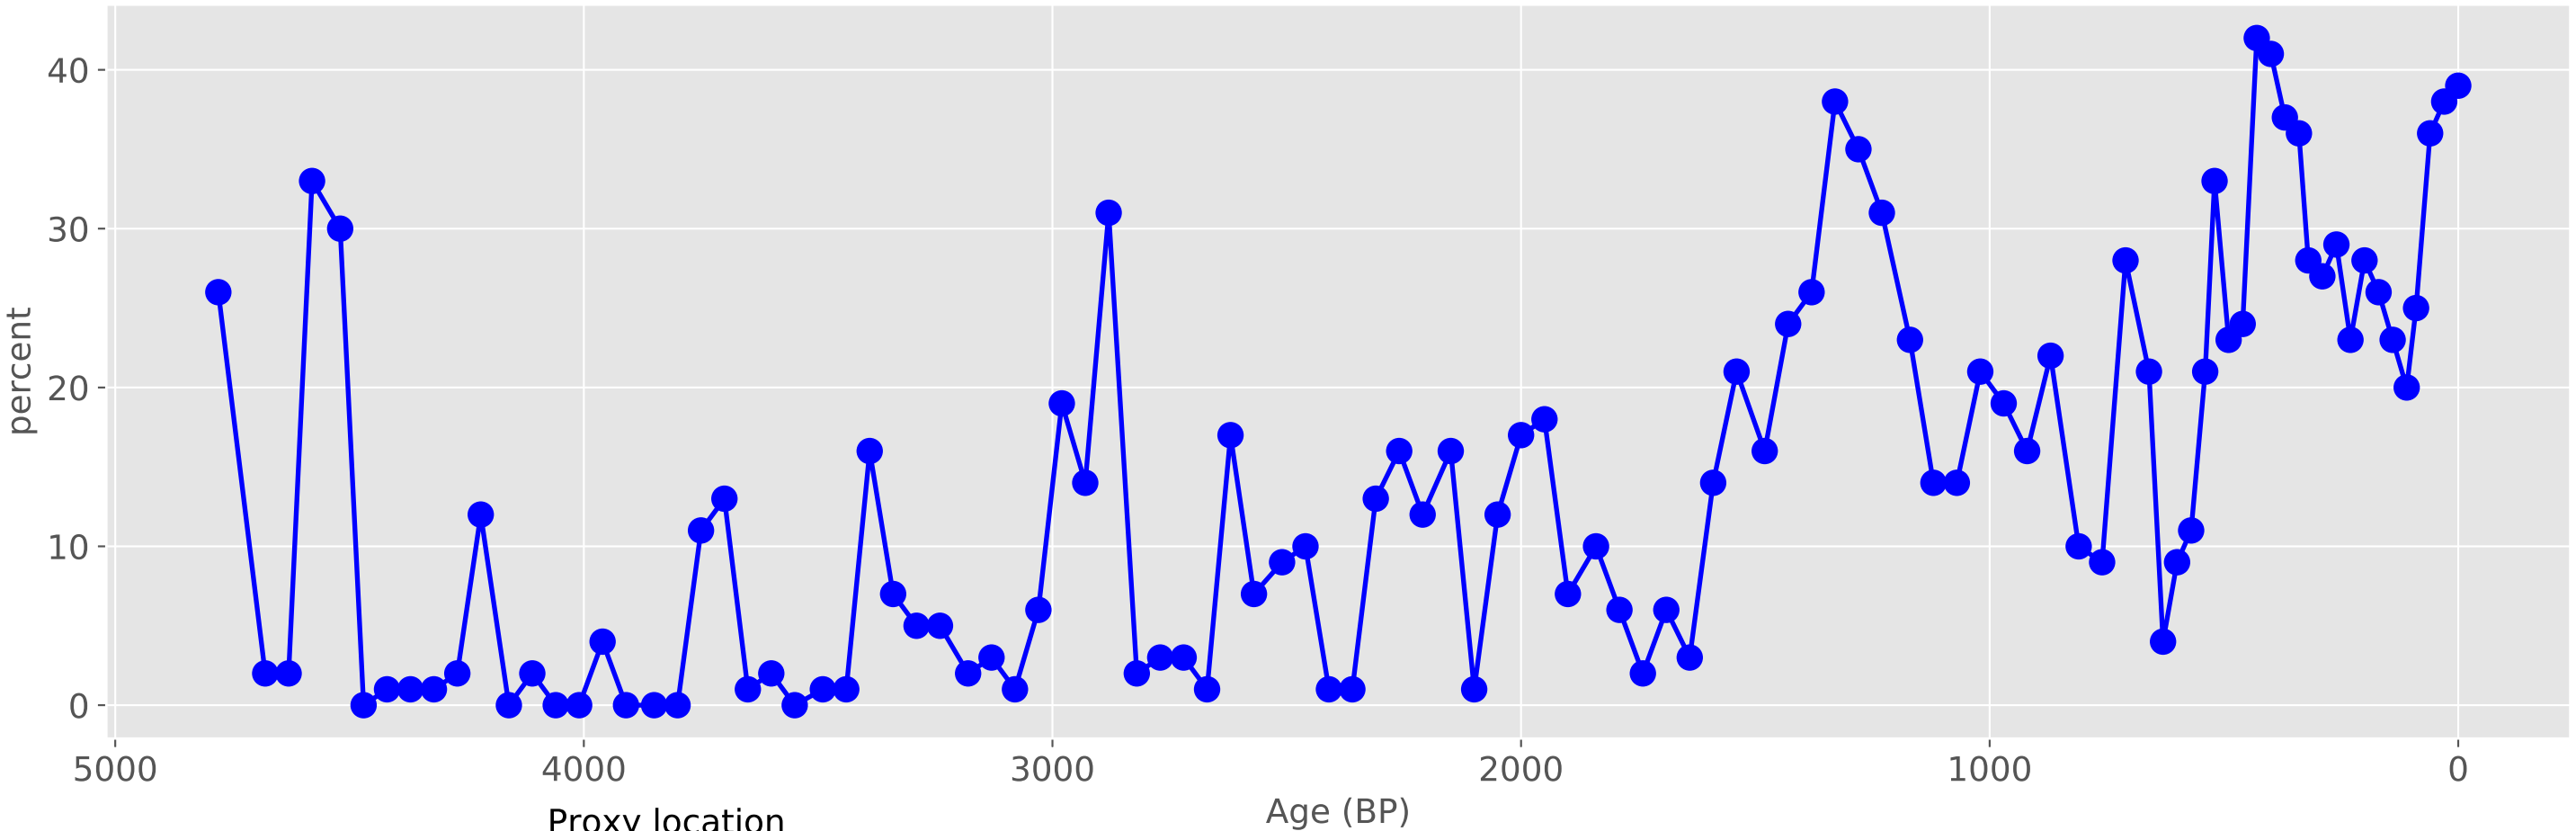

Proxy location  
(40.28 ° N, 123.36 ° W)



|                    |                                                       |
|--------------------|-------------------------------------------------------|
| Dataset name:      | SchellingsBog.Barron.2004                             |
| Archive type:      | LakeSediment                                          |
| Proxy type:        | pollen                                                |
| Variable name:     | Fir                                                   |
| Latitude ( ° N):   | 40.28                                                 |
| Longitude ( ° E):  | -123.36                                               |
| Elevation (m):     | 910.0                                                 |
| Interp. variable:  | P-E                                                   |
| Interp. detail:    | @surface                                              |
| Interp. season:    | annual                                                |
| Interp. direction: | positive                                              |
| Pub. 1 title:      | High resolution climate of the past 3,500 years of... |
| Pub. 1 authors:    |                                                       |
| Pub. 1 year:       | 2004                                                  |
| Pub. 1 DOI:        |                                                       |
| Original data URL: | wNAm                                                  |



Proxy data and metadata  
LakeSediment | pollen | RedRock.Maher.1972 | M2L4xdcrrehP

Proxy time series: temperature

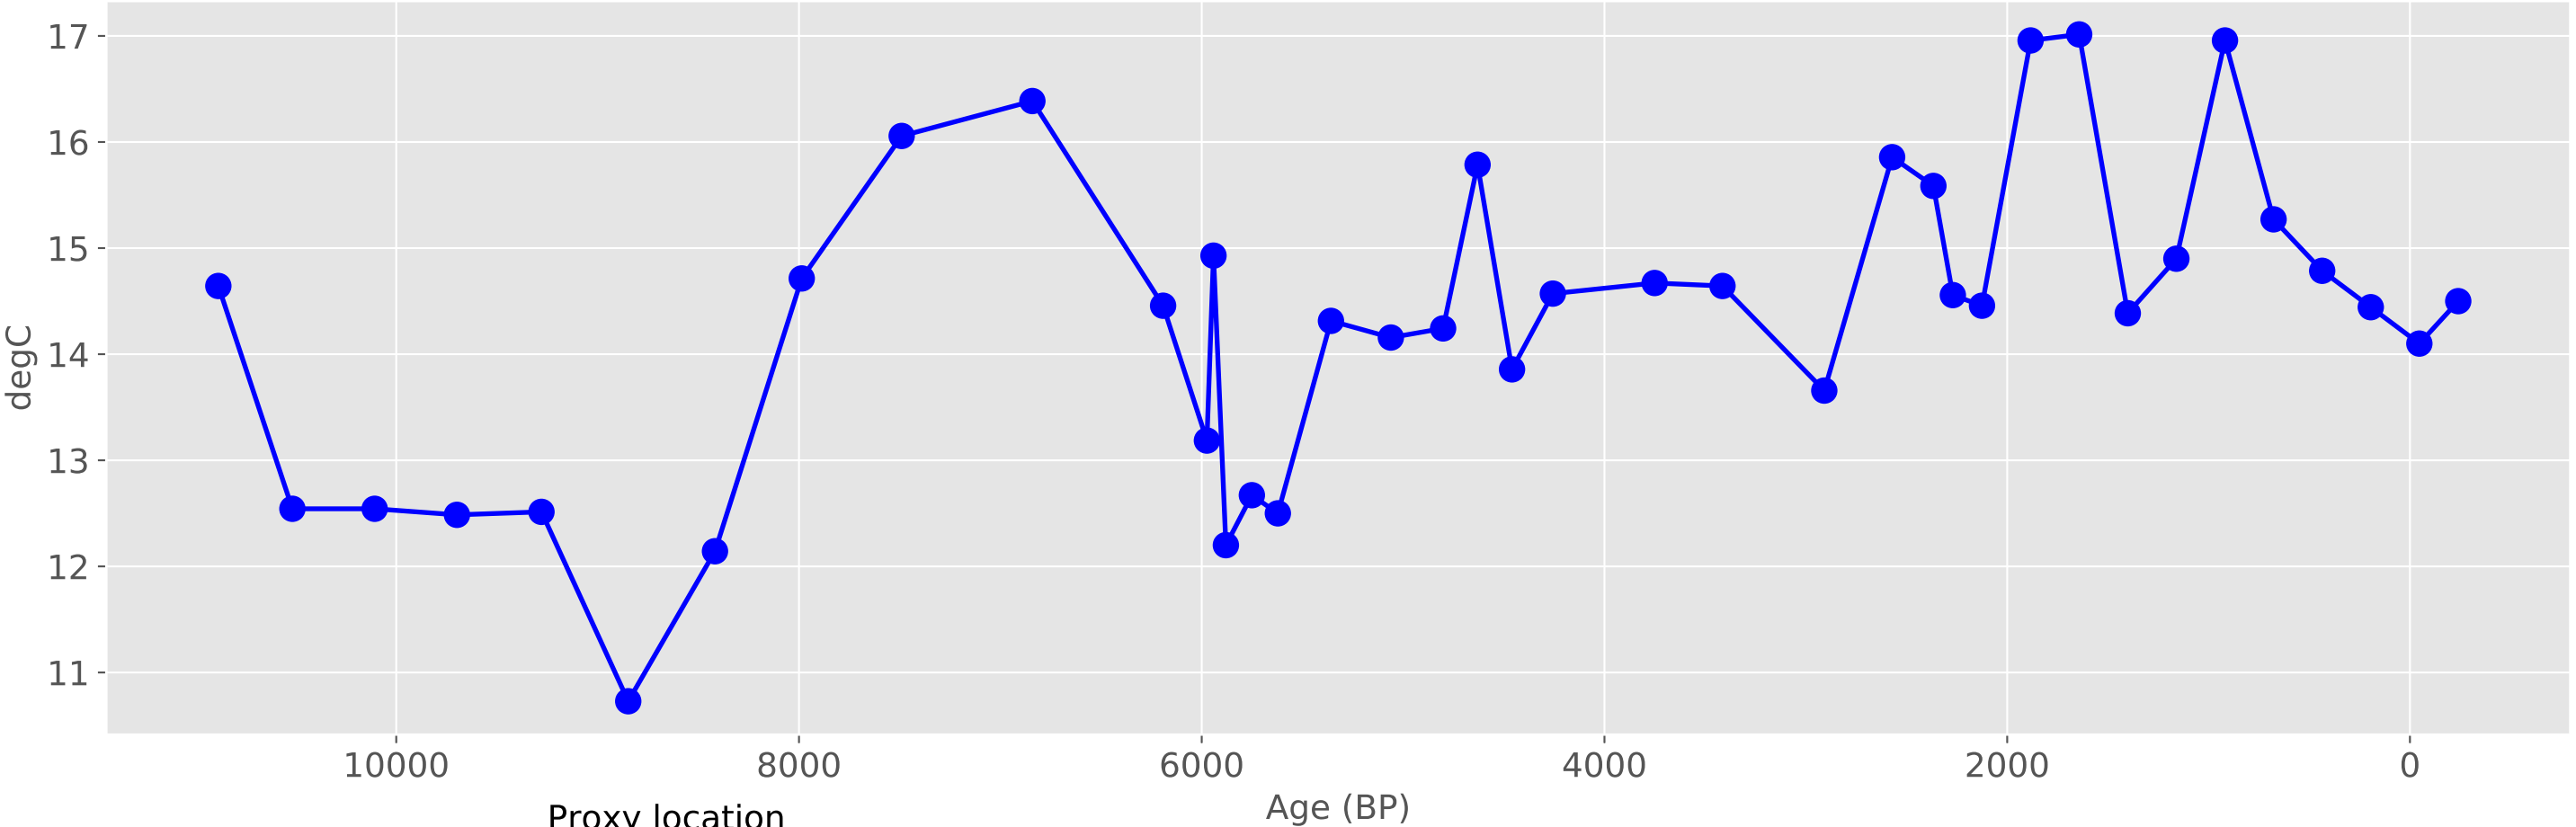

Proxy location  
(40.08 ° N, 105.54 ° W)

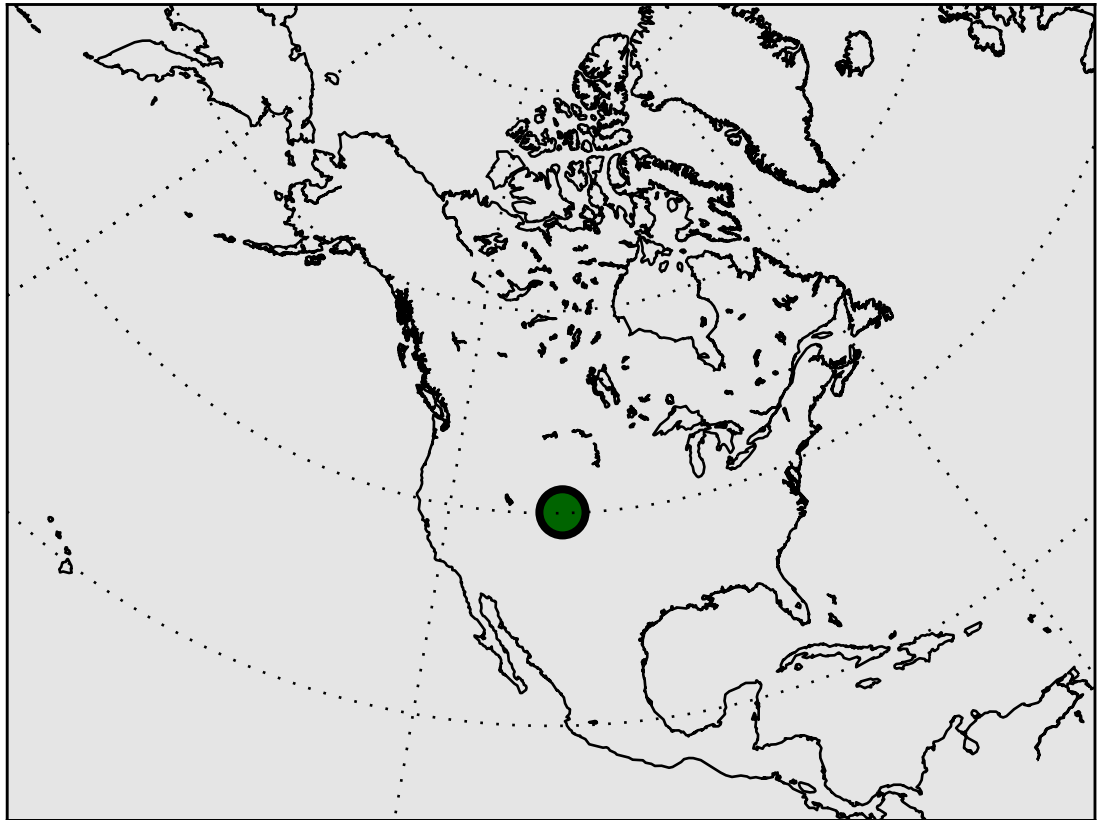

|                    |                                                                                              |
|--------------------|----------------------------------------------------------------------------------------------|
| Dataset name:      | RedRock.Maher.1972                                                                           |
| Archive type:      | LakeSediment                                                                                 |
| Proxy type:        | pollen                                                                                       |
| Variable name:     | temperature                                                                                  |
| Latitude ( ° N):   | 40.08                                                                                        |
| Longitude ( ° E):  | -105.54                                                                                      |
| Elevation (m):     | 3095.0                                                                                       |
| Interp. variable:  | T                                                                                            |
| Interp. detail:    | air@surface                                                                                  |
| Interp. season:    | summer+                                                                                      |
| Interp. direction: | positive                                                                                     |
| Pub. 1 title:      | Absolute pollen diagram of Redrock Lake, Boulder C...                                        |
| Pub. 1 authors:    | Maher, Louis J.                                                                              |
| Pub. 1 year:       | 1972                                                                                         |
| Pub. 1 DOI:        | 10.1016/0033-5894(72)90090-7                                                                 |
| Original data URL: | <a href="http://www.ncdc.noaa.gov/paleo/study/27330">www.ncdc.noaa.gov/paleo/study/27330</a> |

Proxy data and metadata  
LakeSediment | pollen | RedRock.Maher.1972 | M2Lj3ejix02P

Proxy time series: temperature

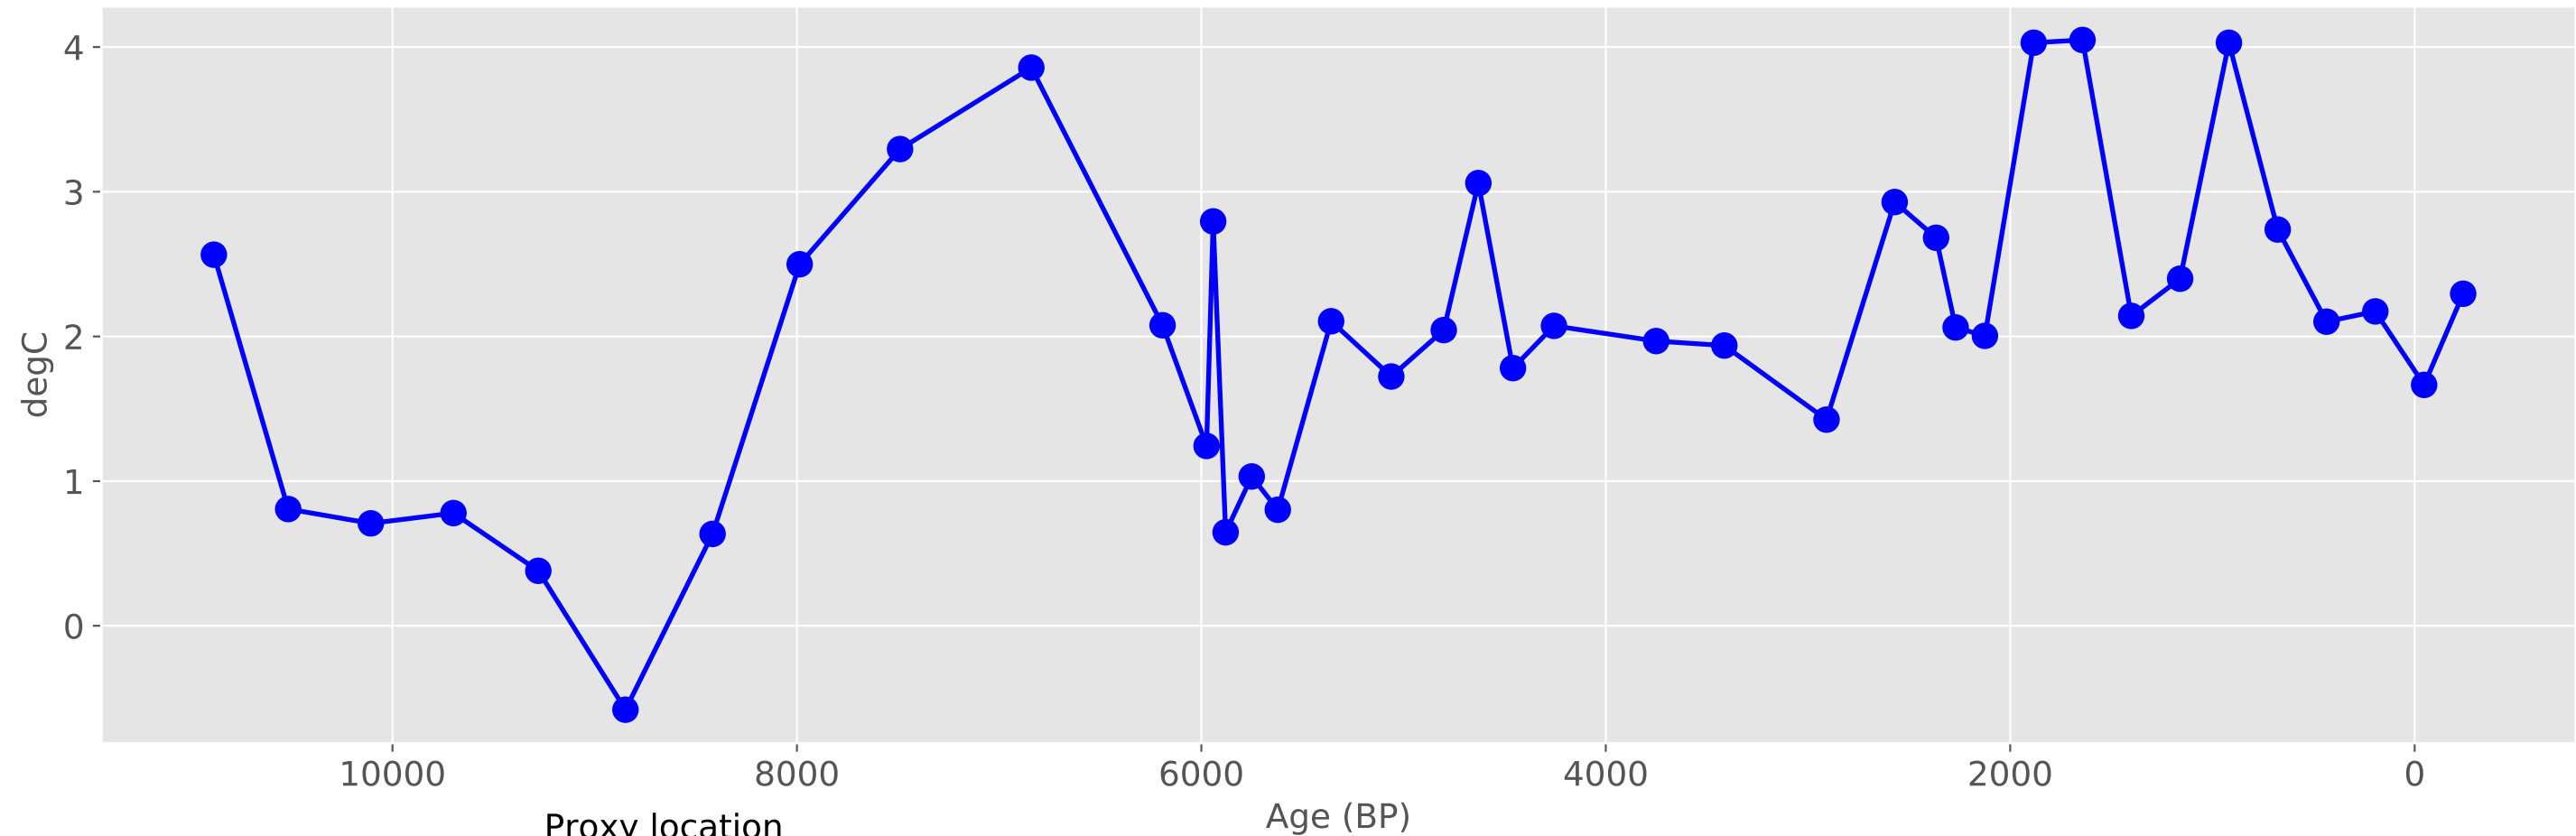

Proxy location  
(40.08 ° N, 105.54 ° W)

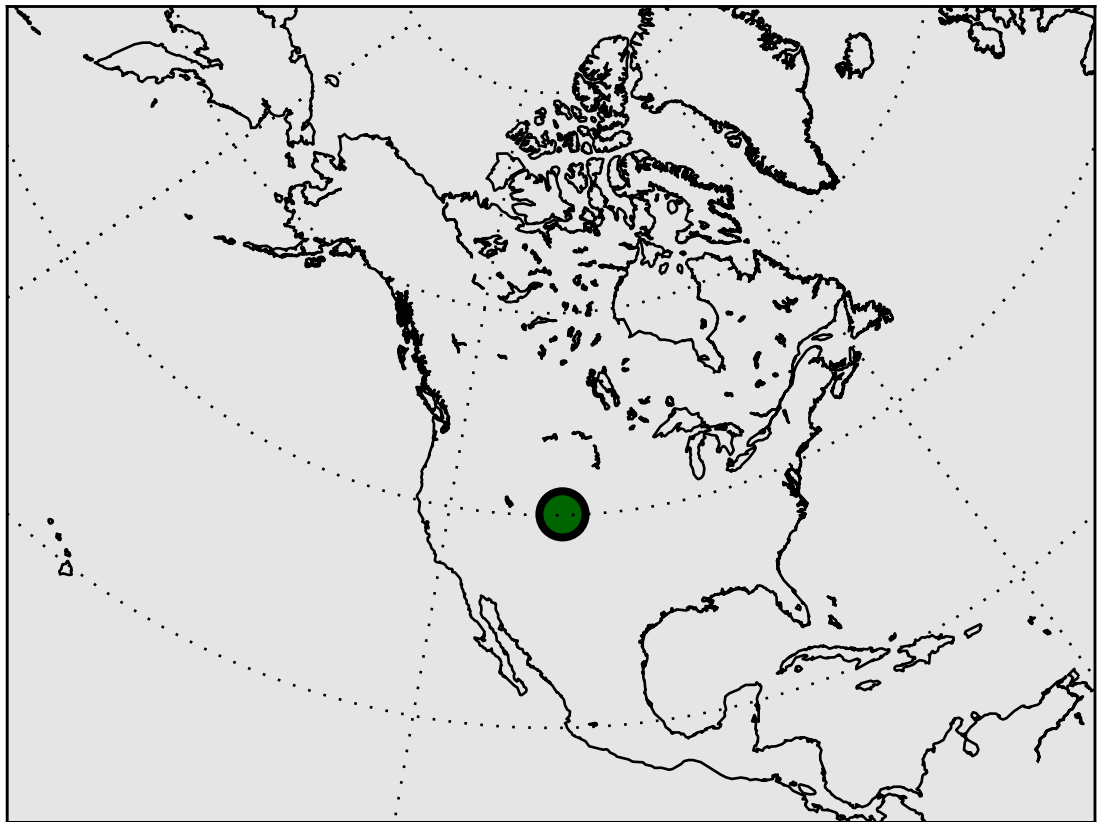

|                    |                                                                                              |
|--------------------|----------------------------------------------------------------------------------------------|
| Dataset name:      | RedRock.Maher.1972                                                                           |
| Archive type:      | LakeSediment                                                                                 |
| Proxy type:        | pollen                                                                                       |
| Variable name:     | temperature                                                                                  |
| Latitude ( ° N):   | 40.08                                                                                        |
| Longitude ( ° E):  | -105.54                                                                                      |
| Elevation (m):     | 3095.0                                                                                       |
| Interp. variable:  | T                                                                                            |
| Interp. detail:    | air@surface                                                                                  |
| Interp. season:    | annual                                                                                       |
| Interp. direction: | positive                                                                                     |
| Pub. 1 title:      | Absolute pollen diagram of Redrock Lake, Boulder C...                                        |
| Pub. 1 authors:    | Maher, Louis J.                                                                              |
| Pub. 1 year:       | 1972                                                                                         |
| Pub. 1 DOI:        | 10.1016/0033-5894(72)90090-7                                                                 |
| Original data URL: | <a href="http://www.ncdc.noaa.gov/paleo/study/27330">www.ncdc.noaa.gov/paleo/study/27330</a> |

Proxy data and metadata

LakeSediment | pollen | RedRock.Maher.1972 | M2Lodn9z6zeP

Proxy time series: precipitation

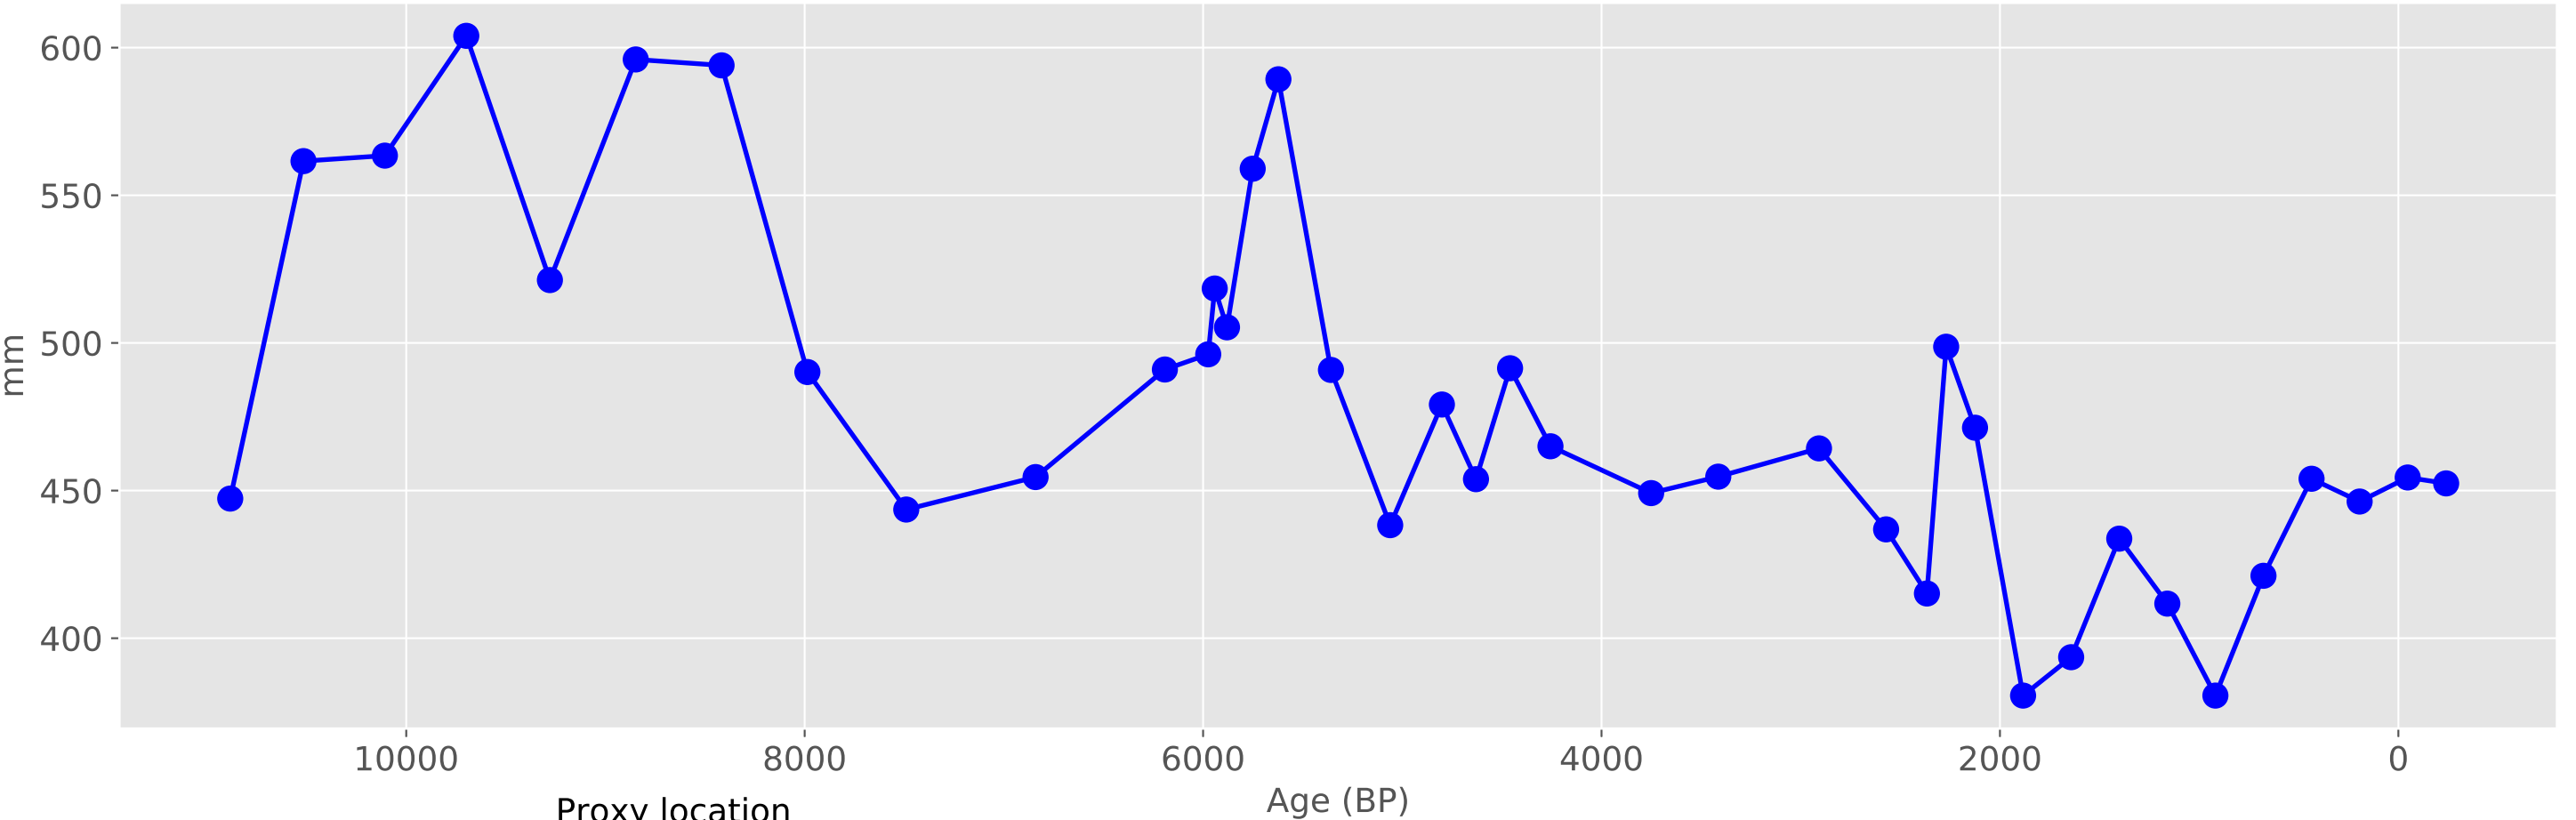

Proxy location  
(40.08 ° N, 105.54 ° W)



|                    |                                                                                              |
|--------------------|----------------------------------------------------------------------------------------------|
| Dataset name:      | RedRock.Maher.1972                                                                           |
| Archive type:      | LakeSediment                                                                                 |
| Proxy type:        | pollen                                                                                       |
| Variable name:     | precipitation                                                                                |
| Latitude ( ° N):   | 40.08                                                                                        |
| Longitude ( ° E):  | -105.54                                                                                      |
| Elevation (m):     | 3095.0                                                                                       |
| Interp. variable:  | P                                                                                            |
| Interp. detail:    | amount@surface                                                                               |
| Interp. season:    | annual                                                                                       |
| Interp. direction: | positive                                                                                     |
| Pub. 1 title:      | Absolute pollen diagram of Redrock Lake, Boulder C...                                        |
| Pub. 1 authors:    | Maher, Louis J.                                                                              |
| Pub. 1 year:       | 1972                                                                                         |
| Pub. 1 DOI:        | 10.1016/0033-5894(72)90090-7                                                                 |
| Original data URL: | <a href="http://www.ncdc.noaa.gov/paleo/study/27330">www.ncdc.noaa.gov/paleo/study/27330</a> |

Proxy data and metadata

LakeSediment | pollen | RedRock.Maher.1972 | M2Lv9vzhhk5P

Proxy time series: temperature

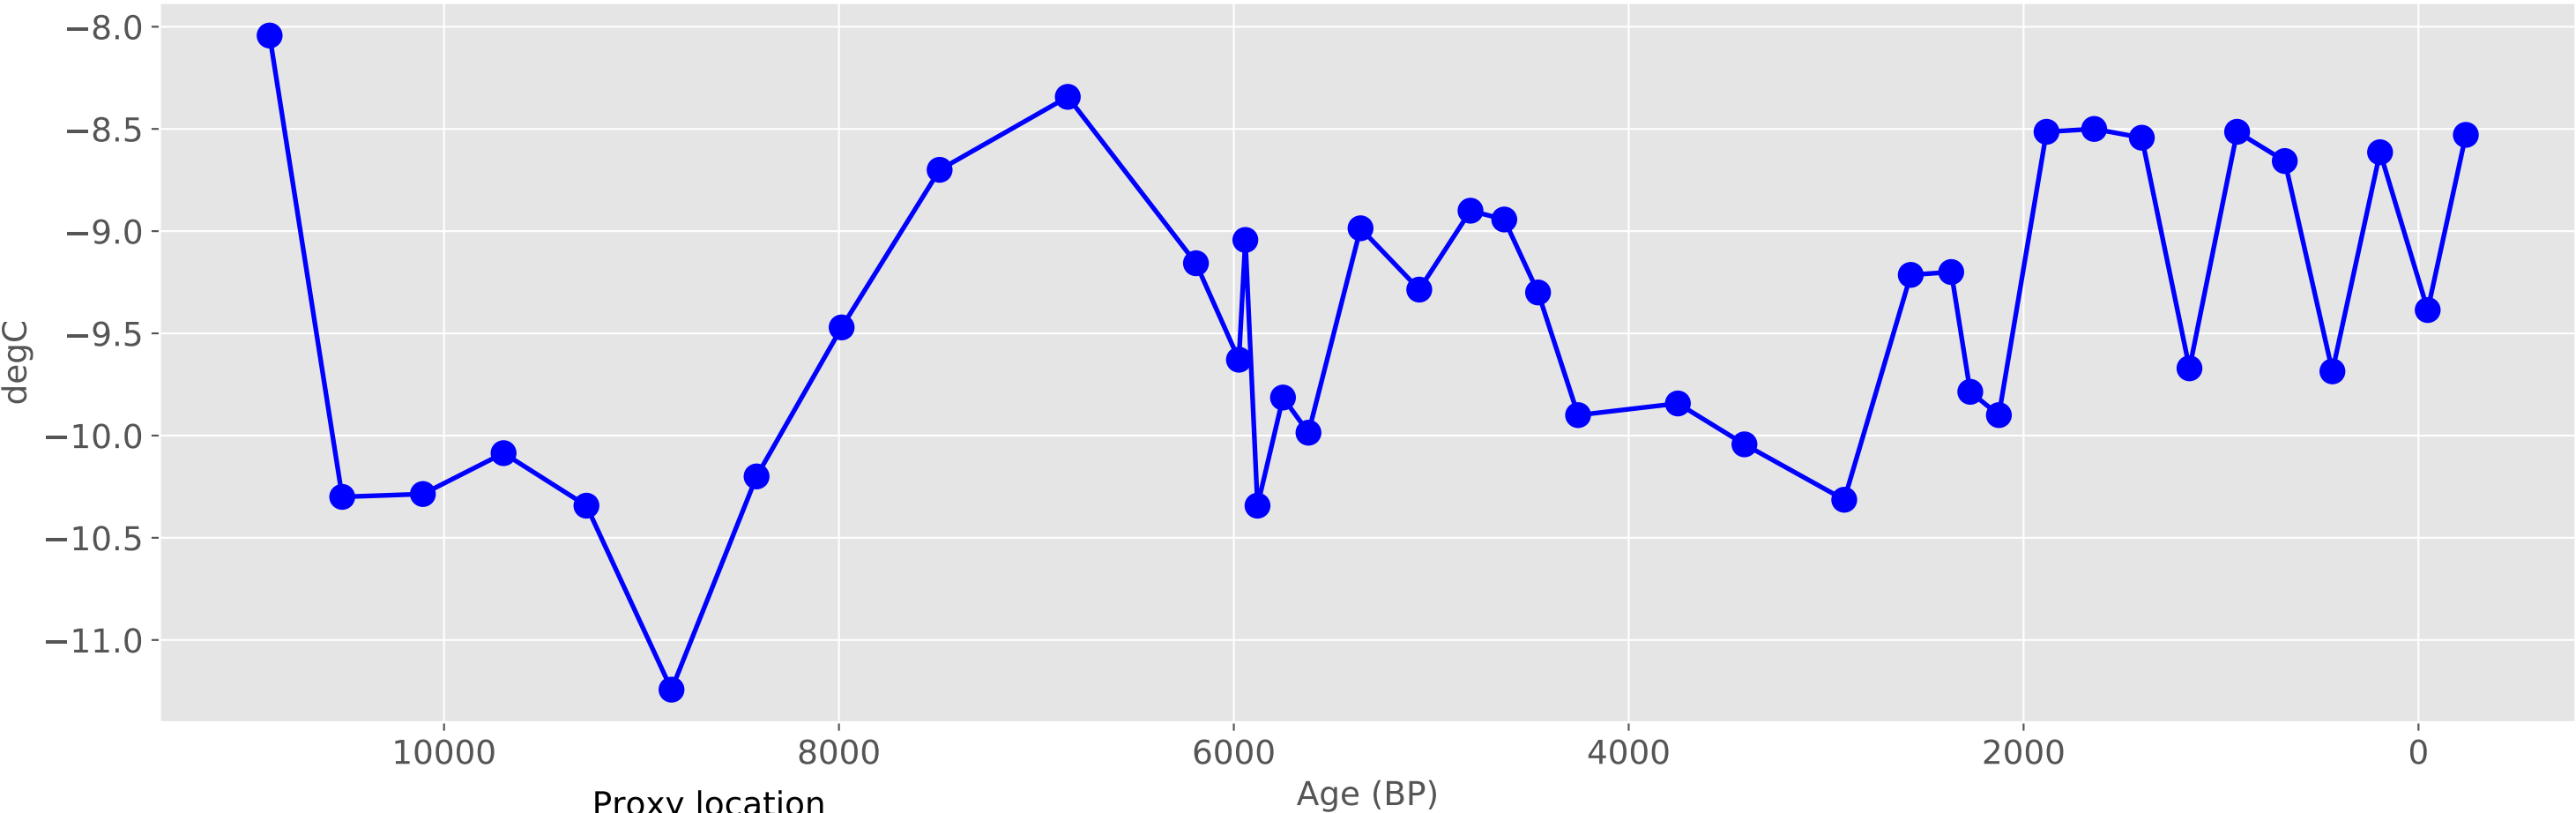

Proxy location  
(40.08 ° N, 105.54 ° W)

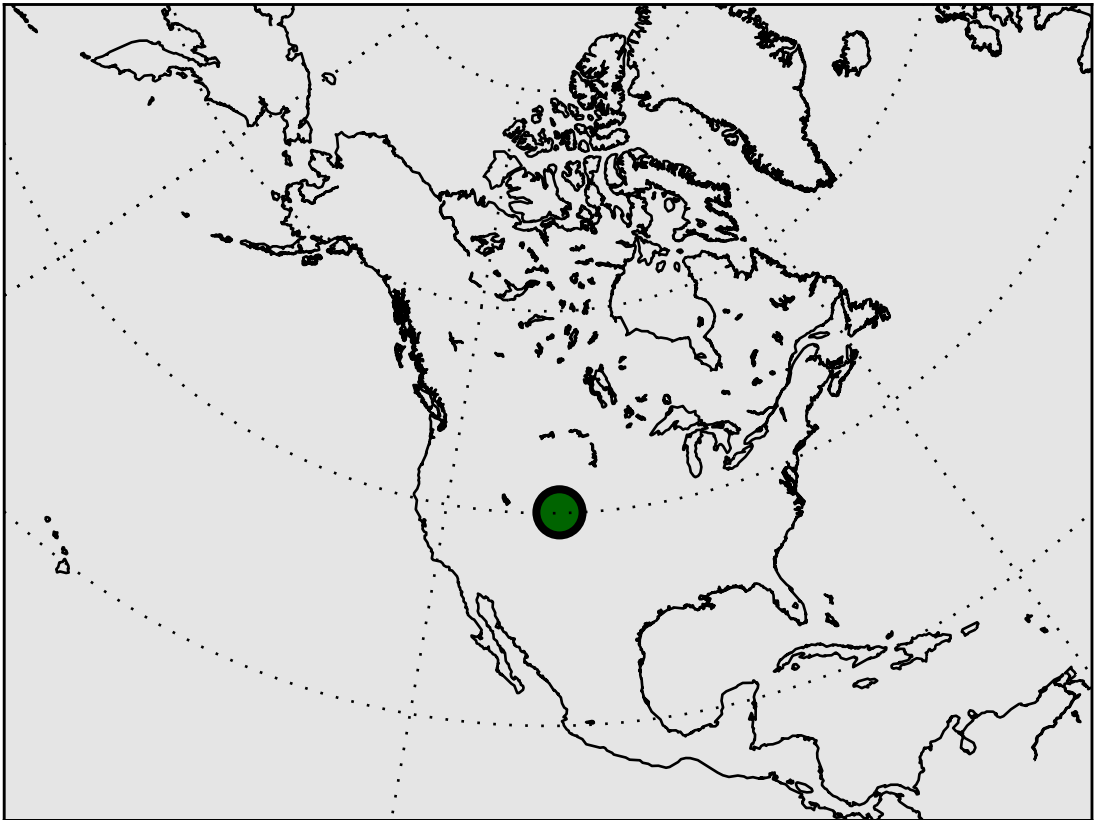

|                    |                                                                                              |
|--------------------|----------------------------------------------------------------------------------------------|
| Dataset name:      | RedRock.Maher.1972                                                                           |
| Archive type:      | LakeSediment                                                                                 |
| Proxy type:        | pollen                                                                                       |
| Variable name:     | temperature                                                                                  |
| Latitude ( ° N):   | 40.08                                                                                        |
| Longitude ( ° E):  | -105.54                                                                                      |
| Elevation (m):     | 3095.0                                                                                       |
| Interp. variable:  | T                                                                                            |
| Interp. detail:    | air@surface                                                                                  |
| Interp. season:    | winter+                                                                                      |
| Interp. direction: | positive                                                                                     |
| Pub. 1 title:      | Absolute pollen diagram of Redrock Lake, Boulder C...                                        |
| Pub. 1 authors:    | Maher, Louis J.                                                                              |
| Pub. 1 year:       | 1972                                                                                         |
| Pub. 1 DOI:        | 10.1016/0033-5894(72)90090-7                                                                 |
| Original data URL: | <a href="http://www.ncdc.noaa.gov/paleo/study/27330">www.ncdc.noaa.gov/paleo/study/27330</a> |

Proxy data and metadata  
LakeSediment | pollen | Eldora.Maher.1969 | M2LiaueutgvP

Proxy time series: temperature

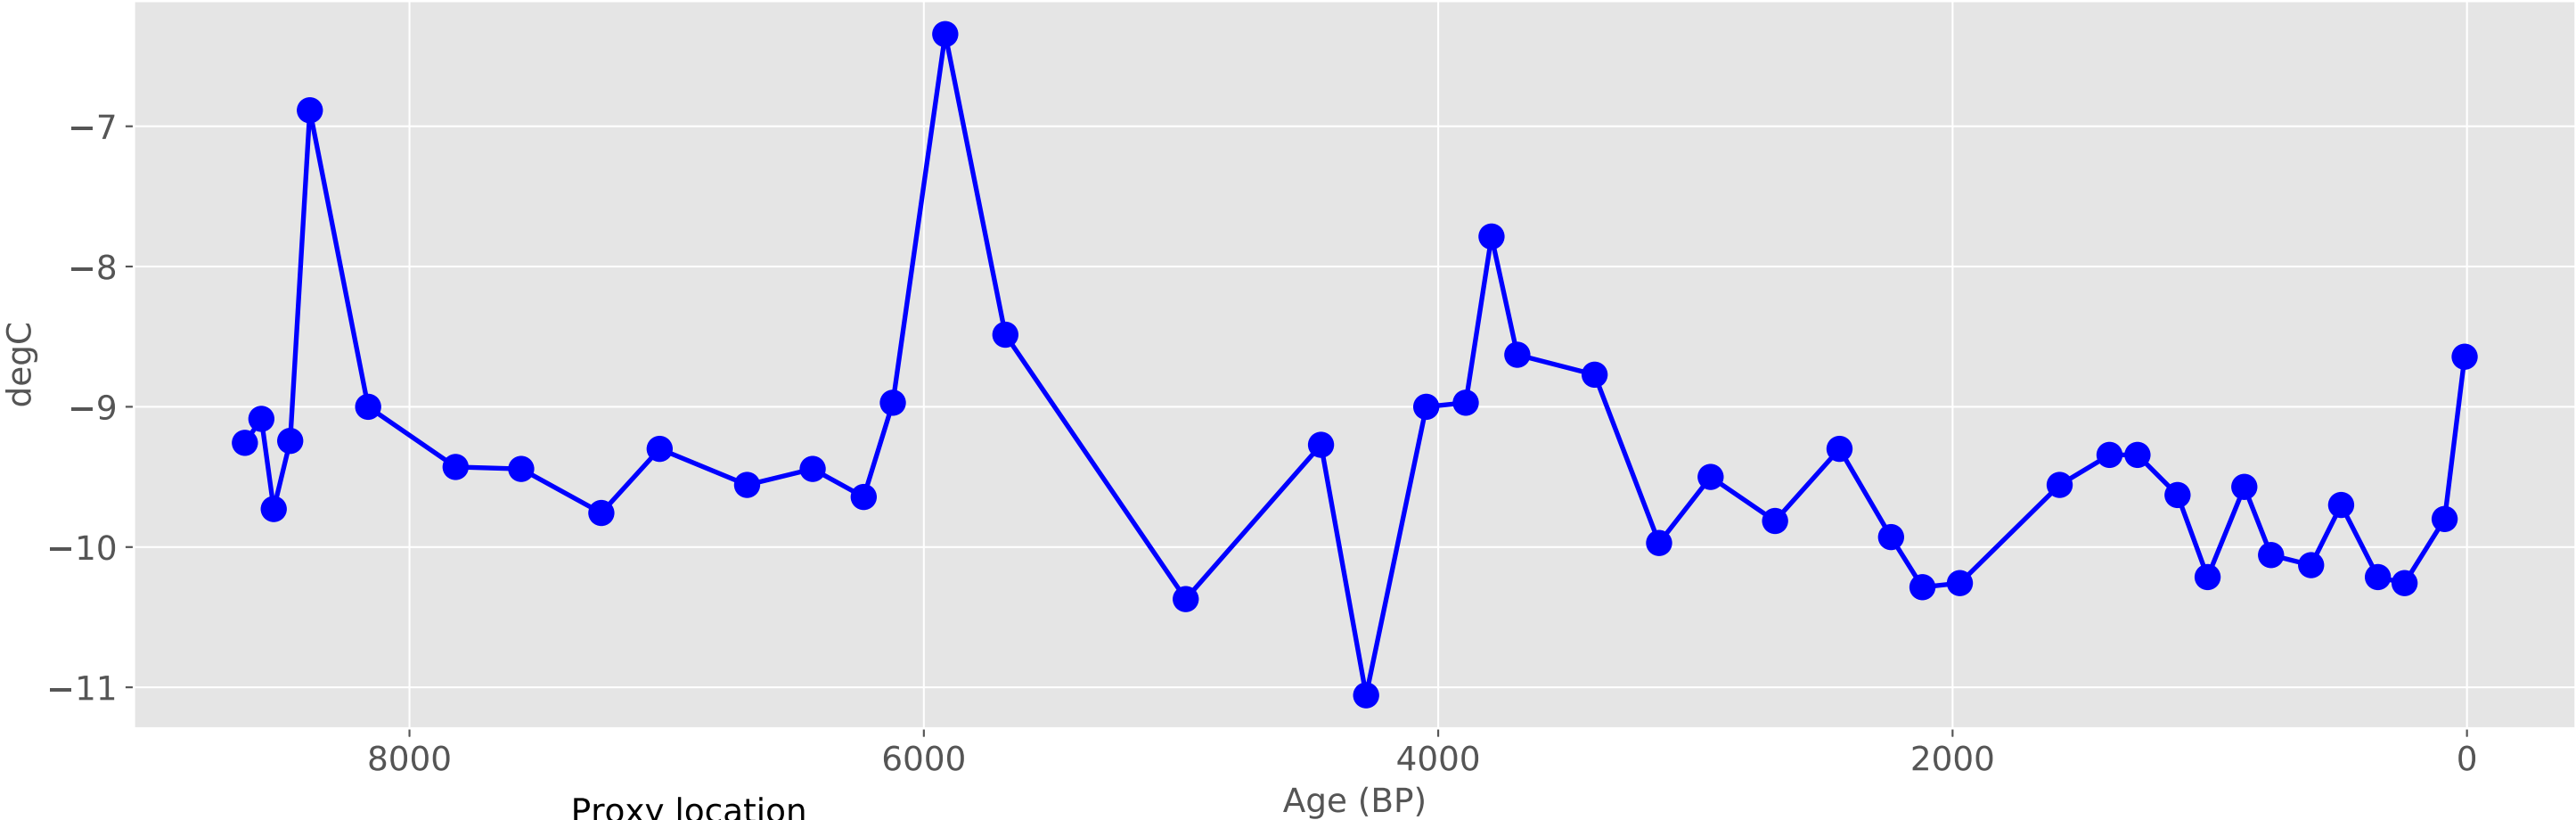

Proxy location  
(39.94 ° N, 105.58 ° W)

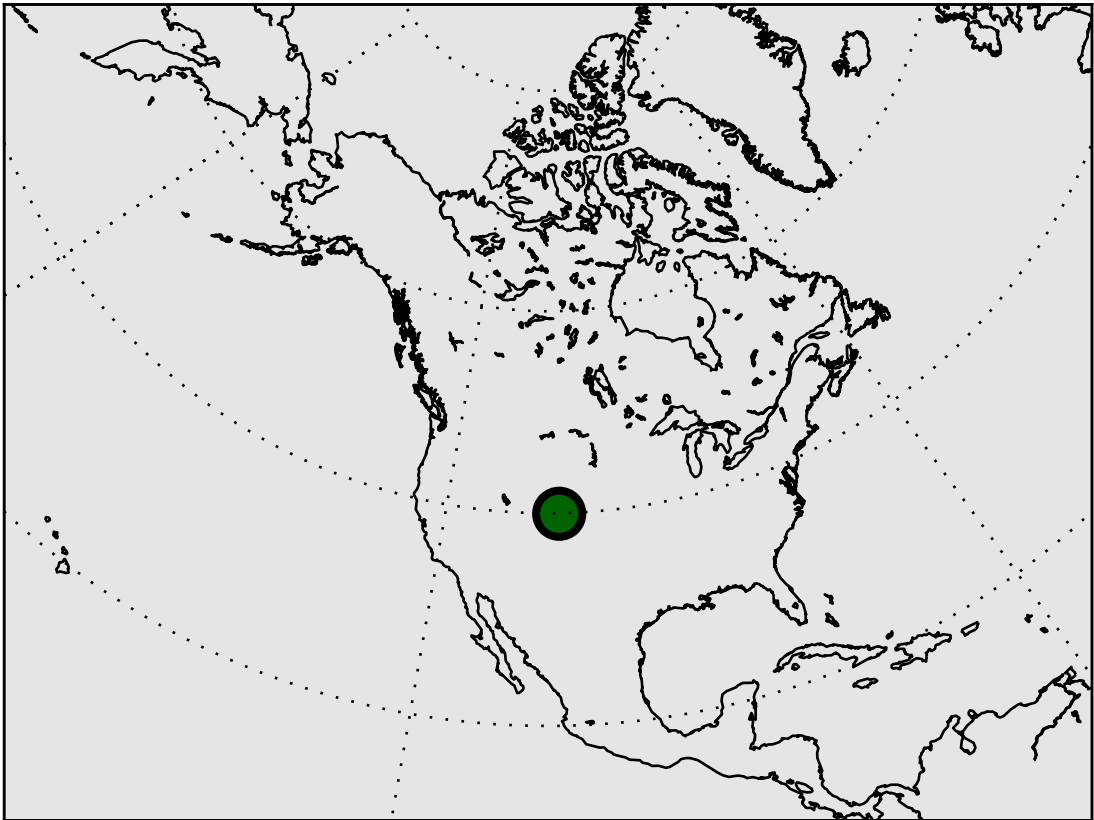

|                    |                                                                                              |
|--------------------|----------------------------------------------------------------------------------------------|
| Dataset name:      | Eldora.Maher.1969                                                                            |
| Archive type:      | LakeSediment                                                                                 |
| Proxy type:        | pollen                                                                                       |
| Variable name:     | temperature                                                                                  |
| Latitude ( ° N):   | 39.94                                                                                        |
| Longitude ( ° E):  | -105.58                                                                                      |
| Elevation (m):     | 2848.0                                                                                       |
| Interp. variable:  | T                                                                                            |
| Interp. detail:    | air@surface                                                                                  |
| Interp. season:    | winter+                                                                                      |
| Interp. direction: | positive                                                                                     |
| Pub. 1 title:      |                                                                                              |
| Pub. 1 authors:    |                                                                                              |
| Pub. 1 year:       |                                                                                              |
| Pub. 1 DOI:        | noPubOnRecord                                                                                |
| Original data URL: | <a href="http://www.ncdc.noaa.gov/paleo/study/27330">www.ncdc.noaa.gov/paleo/study/27330</a> |

Proxy data and metadata  
LakeSediment | pollen | Eldora.Maher.1969 | M2Lm8jxg50yP

Proxy time series: temperature

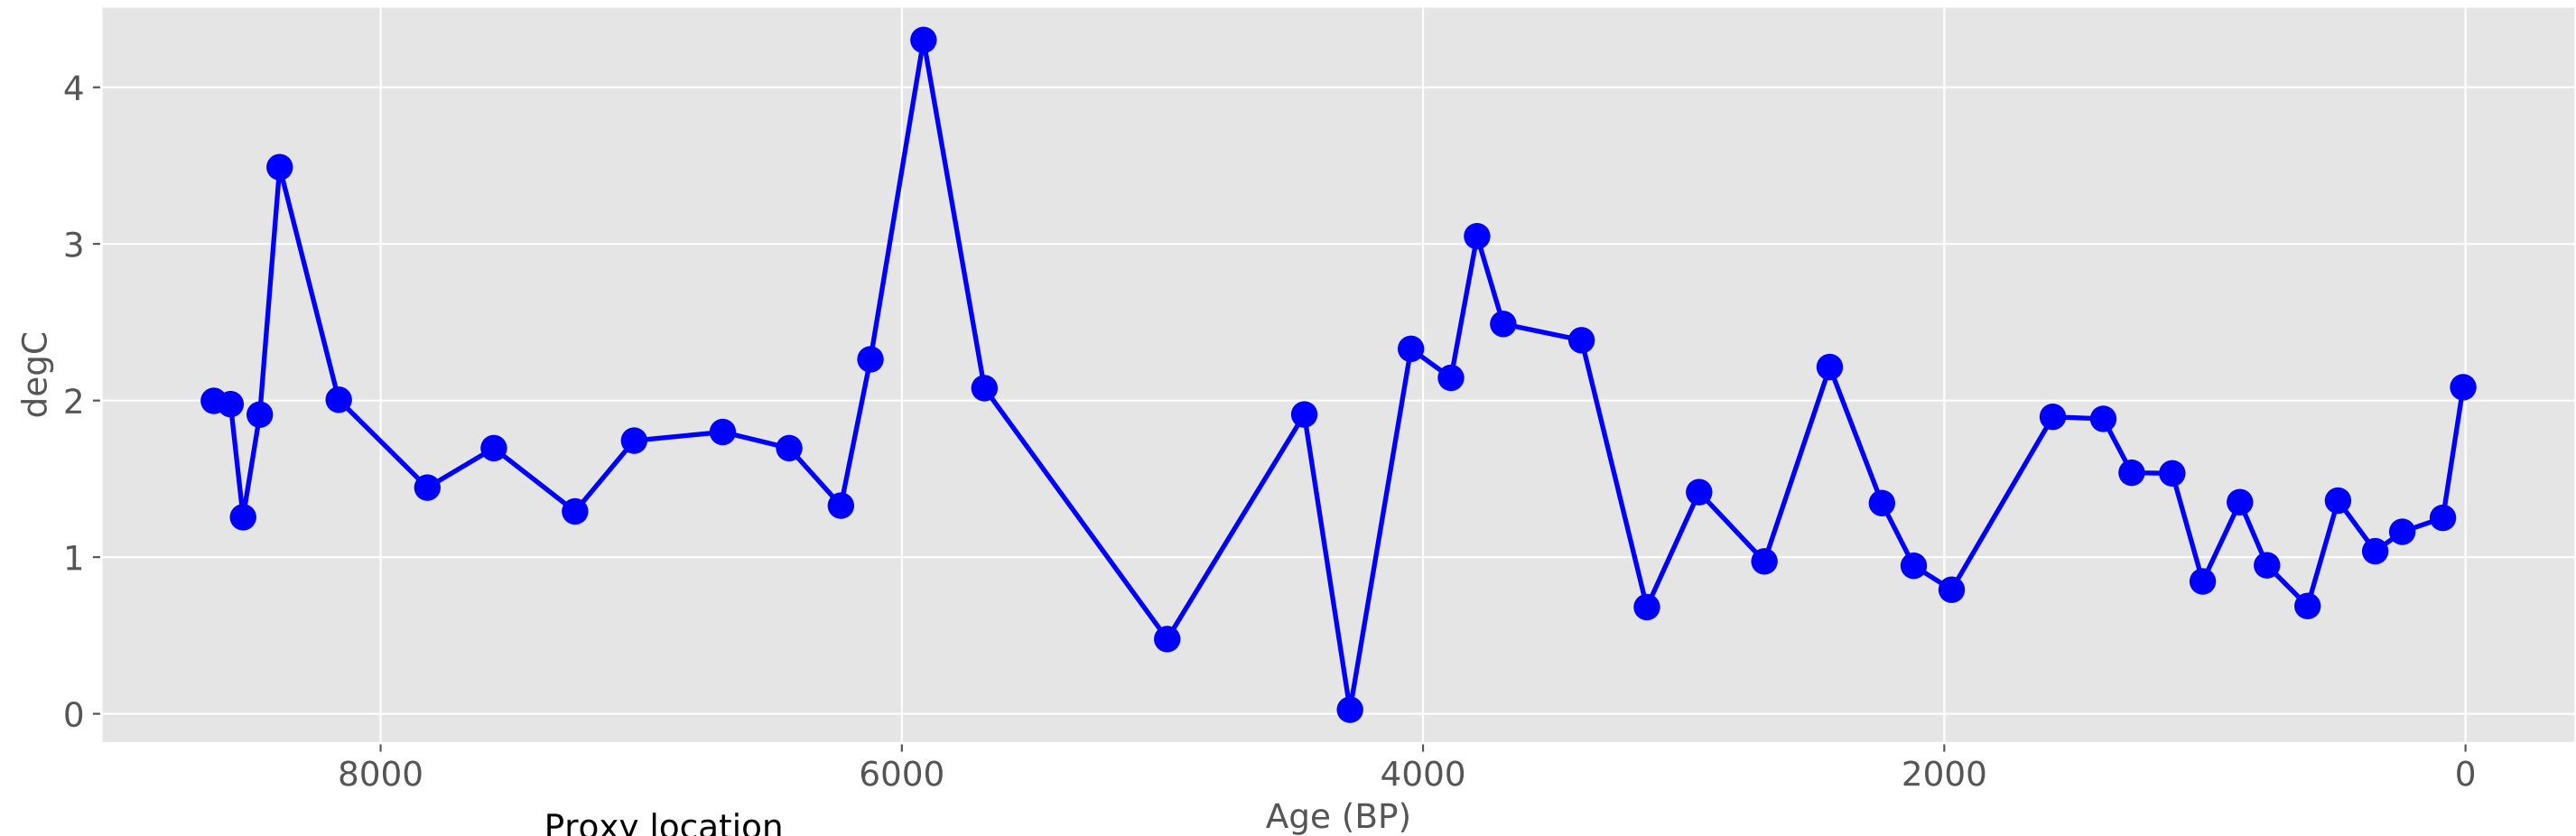

Proxy location  
(39.94 ° N, 105.58 ° W)

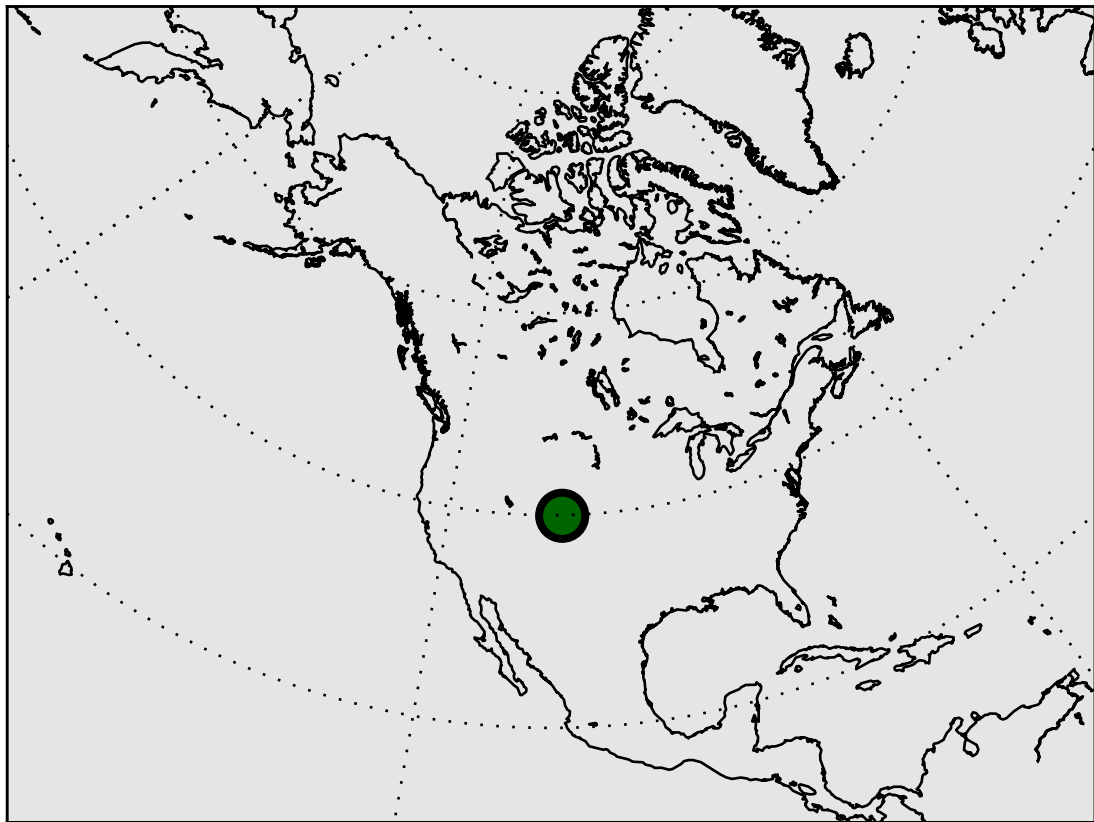

|                    |                                                                                              |
|--------------------|----------------------------------------------------------------------------------------------|
| Dataset name:      | Eldora.Maher.1969                                                                            |
| Archive type:      | LakeSediment                                                                                 |
| Proxy type:        | pollen                                                                                       |
| Variable name:     | temperature                                                                                  |
| Latitude ( ° N):   | 39.94                                                                                        |
| Longitude ( ° E):  | -105.58                                                                                      |
| Elevation (m):     | 2848.0                                                                                       |
| Interp. variable:  | T                                                                                            |
| Interp. detail:    | air@surface                                                                                  |
| Interp. season:    | annual                                                                                       |
| Interp. direction: | positive                                                                                     |
| Pub. 1 title:      |                                                                                              |
| Pub. 1 authors:    |                                                                                              |
| Pub. 1 year:       |                                                                                              |
| Pub. 1 DOI:        | noPubOnRecord                                                                                |
| Original data URL: | <a href="http://www.ncdc.noaa.gov/paleo/study/27330">www.ncdc.noaa.gov/paleo/study/27330</a> |



Proxy data and metadata  
LakeSediment | pollen | Eldora.Maher.1969 | M2Loyb6cjt9P

Proxy time series: precipitation

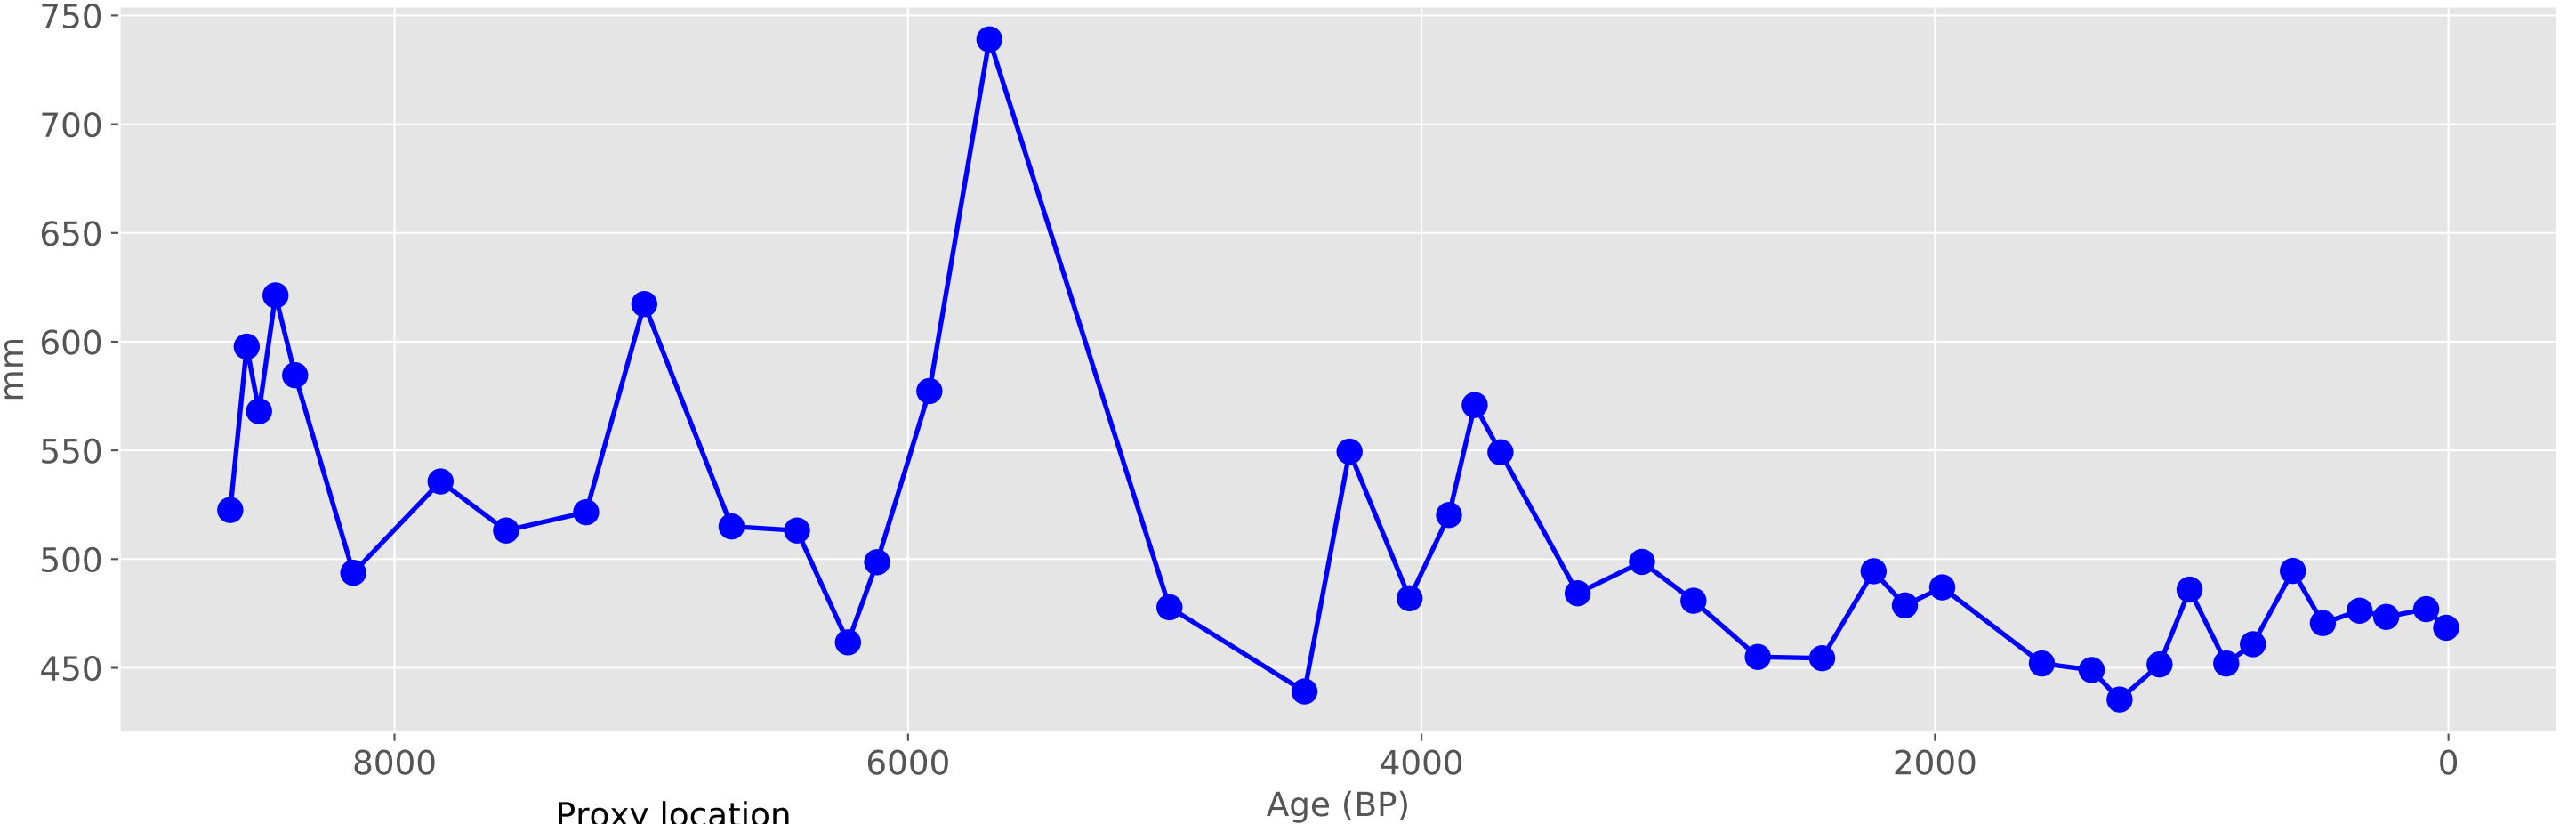

Proxy location  
(39.94 ° N, 105.58 ° W)

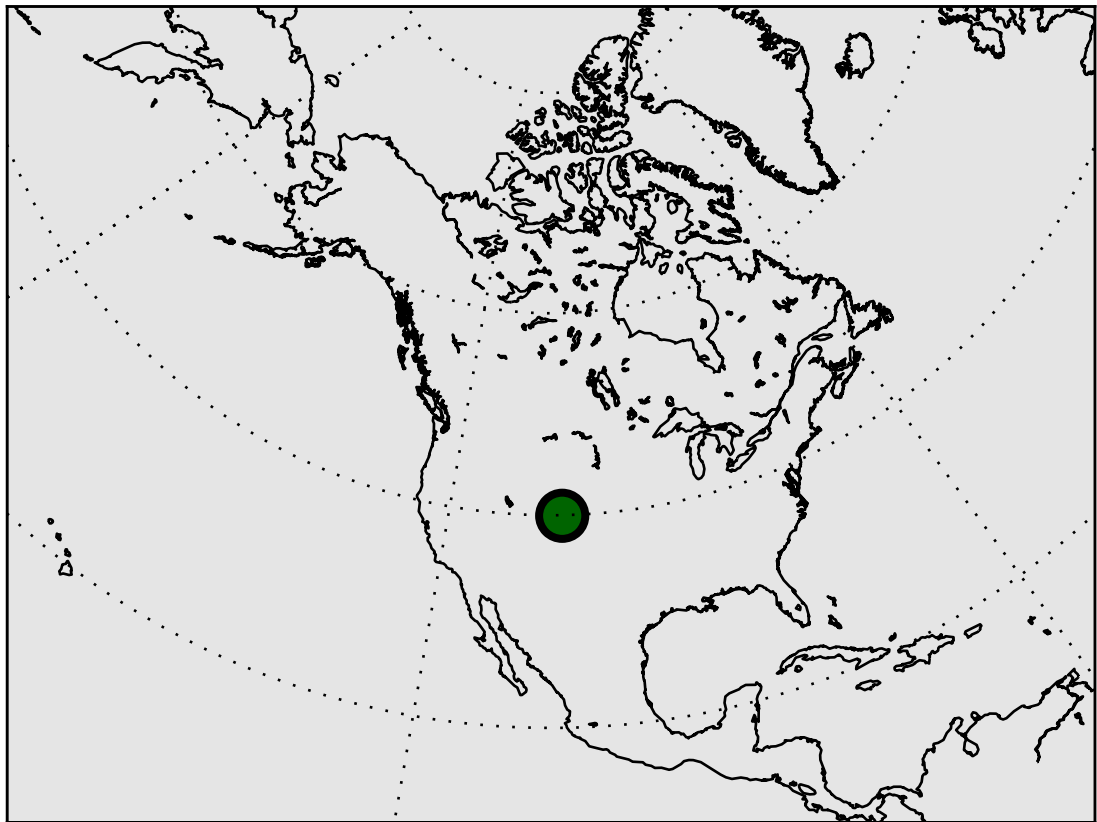

|                    |                                                                                              |
|--------------------|----------------------------------------------------------------------------------------------|
| Dataset name:      | Eldora.Maher.1969                                                                            |
| Archive type:      | LakeSediment                                                                                 |
| Proxy type:        | pollen                                                                                       |
| Variable name:     | precipitation                                                                                |
| Latitude ( ° N):   | 39.94                                                                                        |
| Longitude ( ° E):  | -105.58                                                                                      |
| Elevation (m):     | 2848.0                                                                                       |
| Interp. variable:  | P                                                                                            |
| Interp. detail:    | amount@surface                                                                               |
| Interp. season:    | annual                                                                                       |
| Interp. direction: | positive                                                                                     |
| Pub. 1 title:      |                                                                                              |
| Pub. 1 authors:    |                                                                                              |
| Pub. 1 year:       |                                                                                              |
| Pub. 1 DOI:        | noPubOnRecord                                                                                |
| Original data URL: | <a href="http://www.ncdc.noaa.gov/paleo/study/27330">www.ncdc.noaa.gov/paleo/study/27330</a> |

Proxy data and metadata  
LakeSediment | pollen | Eldora.Maher.1969 | M2LxrriubooP

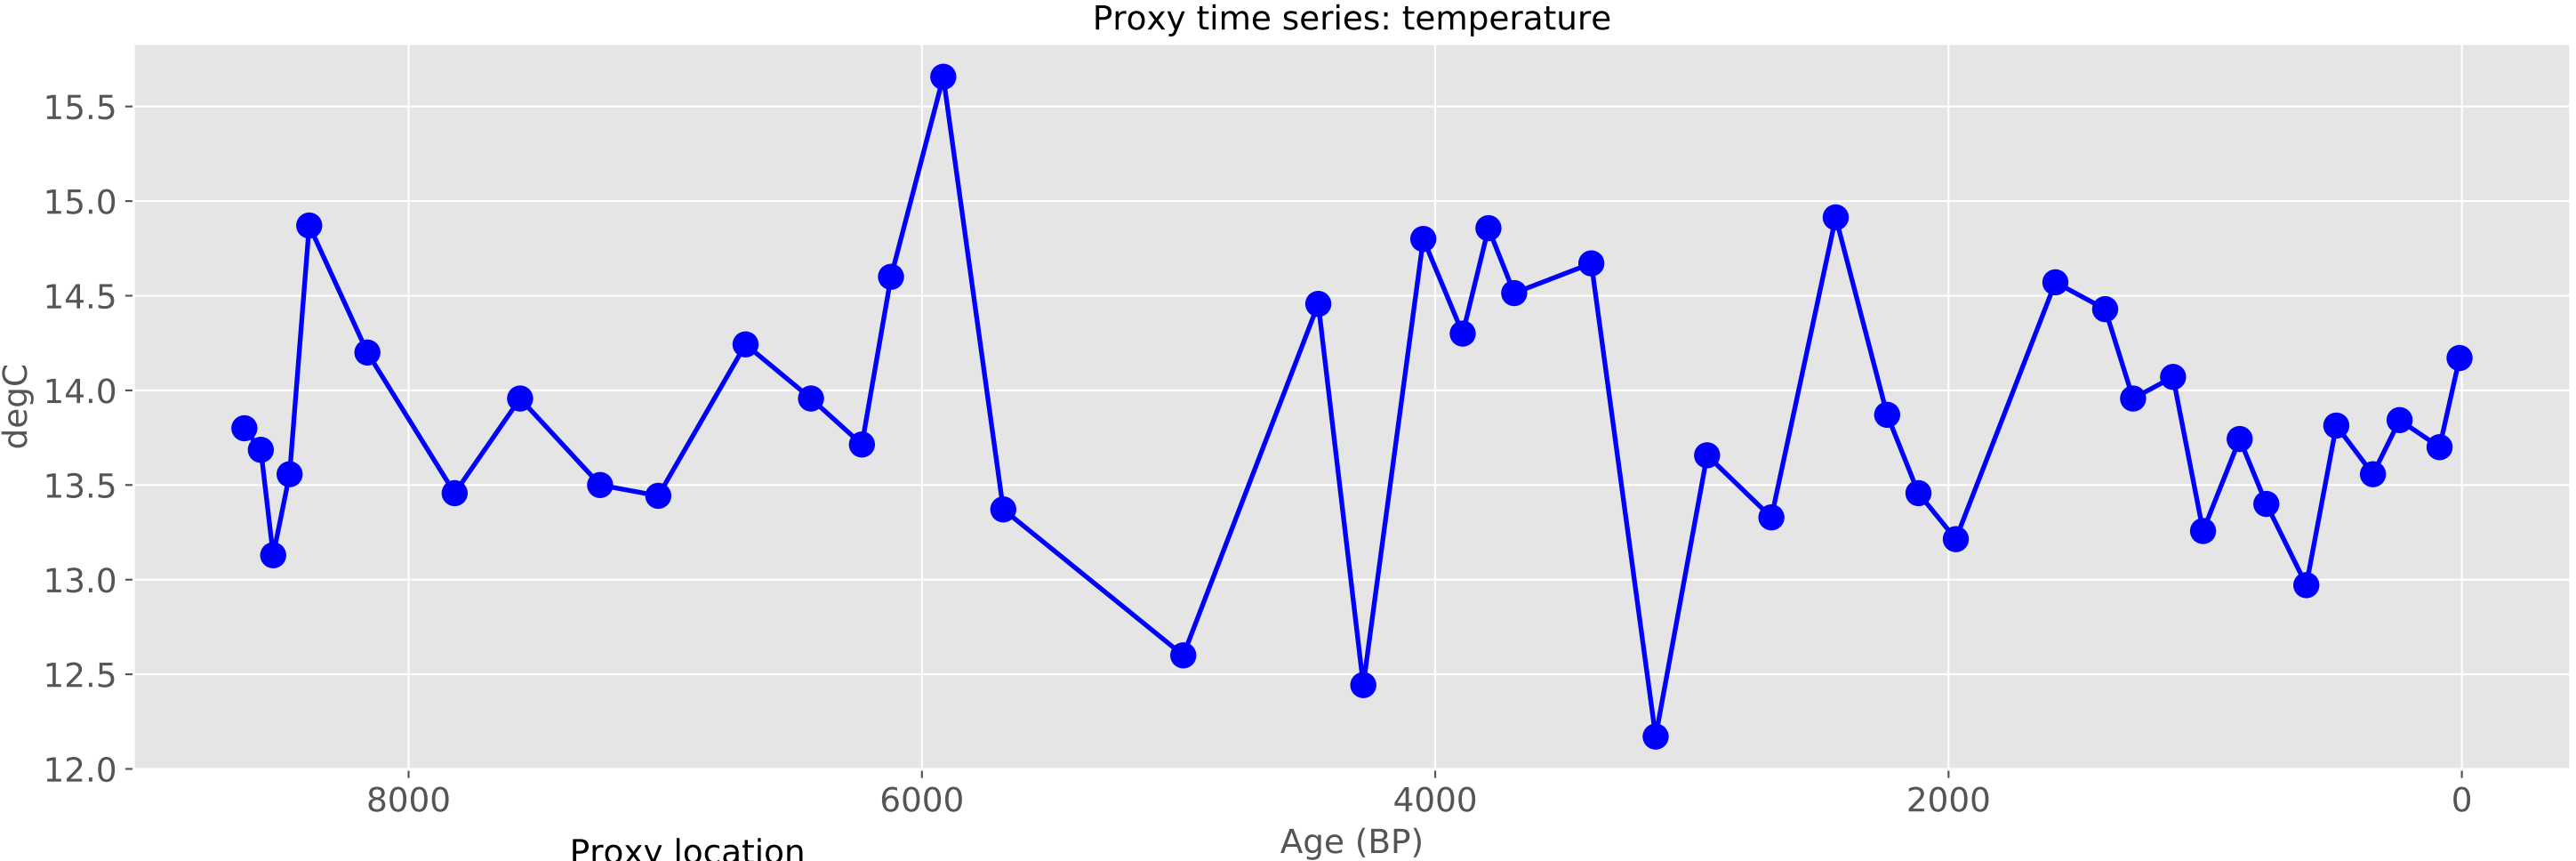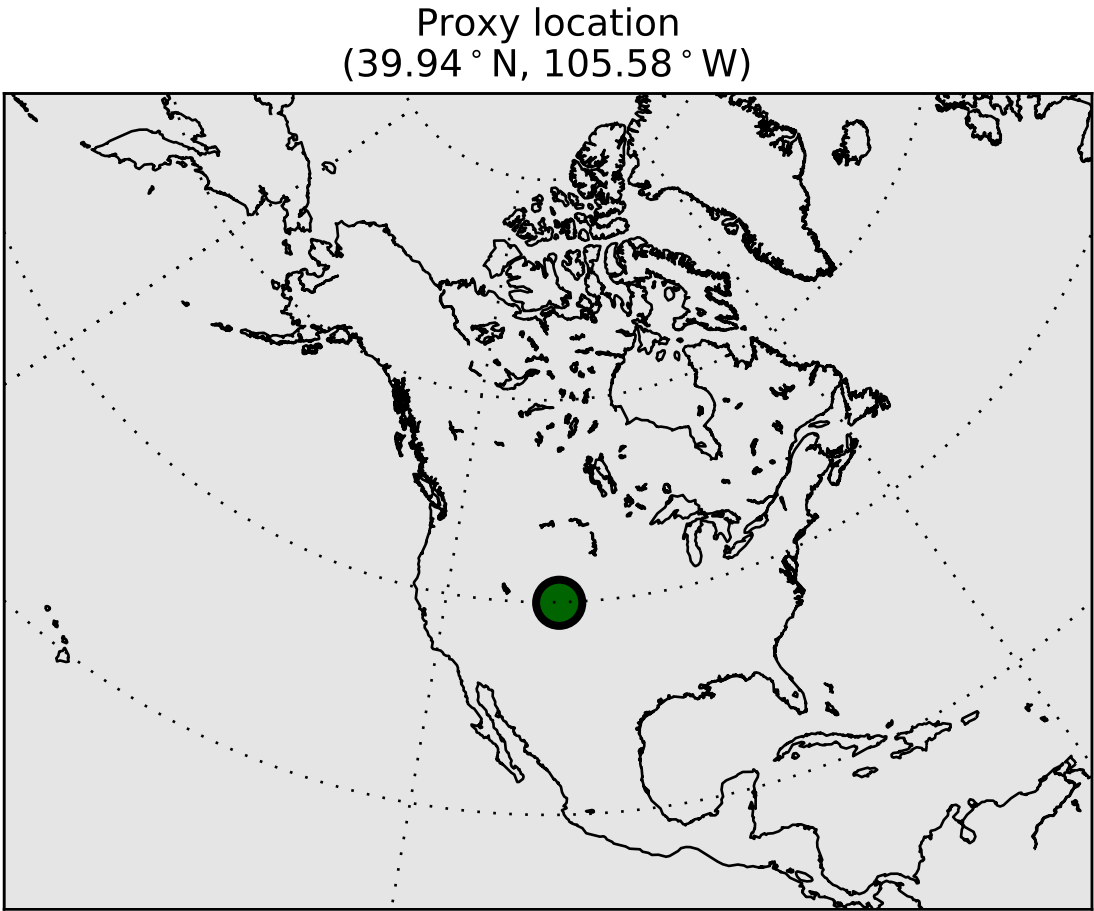

|                    |                                                                                              |
|--------------------|----------------------------------------------------------------------------------------------|
| Dataset name:      | Eldora.Maher.1969                                                                            |
| Archive type:      | LakeSediment                                                                                 |
| Proxy type:        | pollen                                                                                       |
| Variable name:     | temperature                                                                                  |
| Latitude ( ° N):   | 39.94                                                                                        |
| Longitude ( ° E):  | -105.58                                                                                      |
| Elevation (m):     | 2848.0                                                                                       |
| Interp. variable:  | T                                                                                            |
| Interp. detail:    | air@surface                                                                                  |
| Interp. season:    | summer+                                                                                      |
| Interp. direction: | positive                                                                                     |
| Pub. 1 title:      |                                                                                              |
| Pub. 1 authors:    |                                                                                              |
| Pub. 1 year:       |                                                                                              |
| Pub. 1 DOI:        | noPubOnRecord                                                                                |
| Original data URL: | <a href="http://www.ncdc.noaa.gov/paleo/study/27330">www.ncdc.noaa.gov/paleo/study/27330</a> |

Proxy data and metadata

LakeSediment | pollen | KiteLake.JimenezMoreno.2012 | WEB3b8af65c

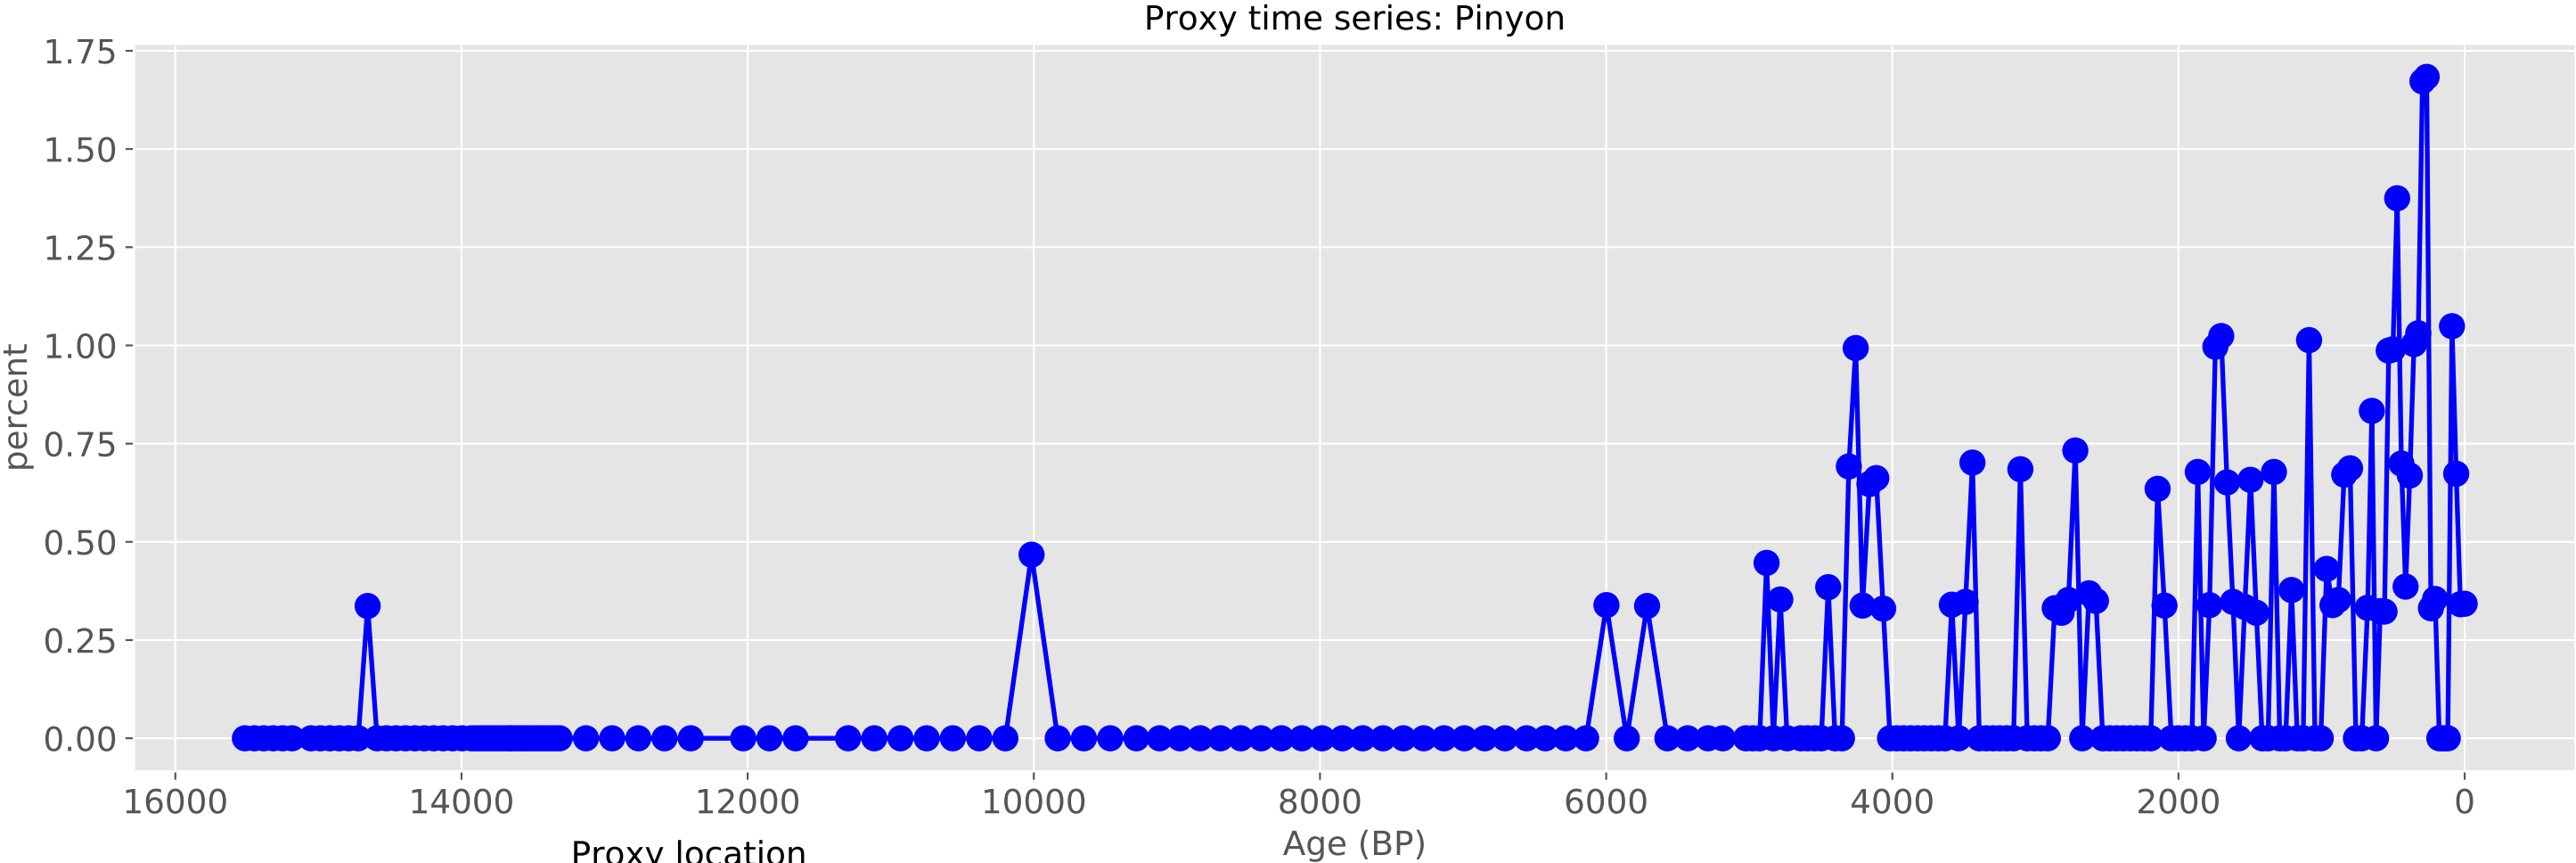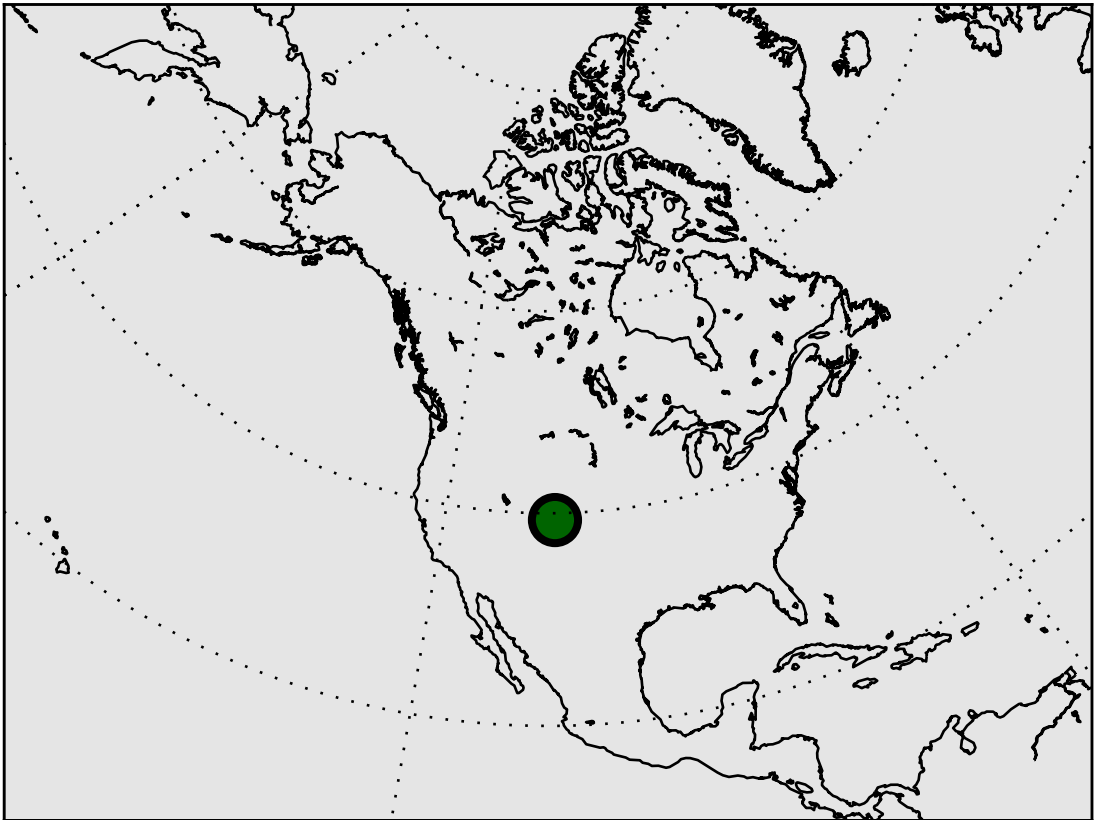

|                    |                                                       |
|--------------------|-------------------------------------------------------|
| Dataset name:      | KiteLake.JimenezMoreno.2012                           |
| Archive type:      | LakeSediment                                          |
| Proxy type:        | pollen                                                |
| Variable name:     | Pinyon                                                |
| Latitude ( ° N):   | 39.3295                                               |
| Longitude ( ° E):  | -106.1298                                             |
| Elevation (m):     | 3668.0                                                |
| Interp. variable:  | P-E                                                   |
| Interp. detail:    | @surface                                              |
| Interp. season:    | winterOnly                                            |
| Interp. direction: | positive                                              |
| Pub. 1 title:      | Pollen and macrofossil evidence of Late Pleistocen... |
| Pub. 1 authors:    | Jiménez-Moreno, Gonzalo;Anderson, R Scott             |
| Pub. 1 year:       | 2012                                                  |
| Pub. 1 DOI:        | 10.1177/0959683612450199                              |
| Original data URL: | wNAm                                                  |

Proxy data and metadata

LakeSediment | pollen | KiteLake.JimenezMoreno.2012 | WEB7ef606cd

Proxy time series: Picea/Artemisia

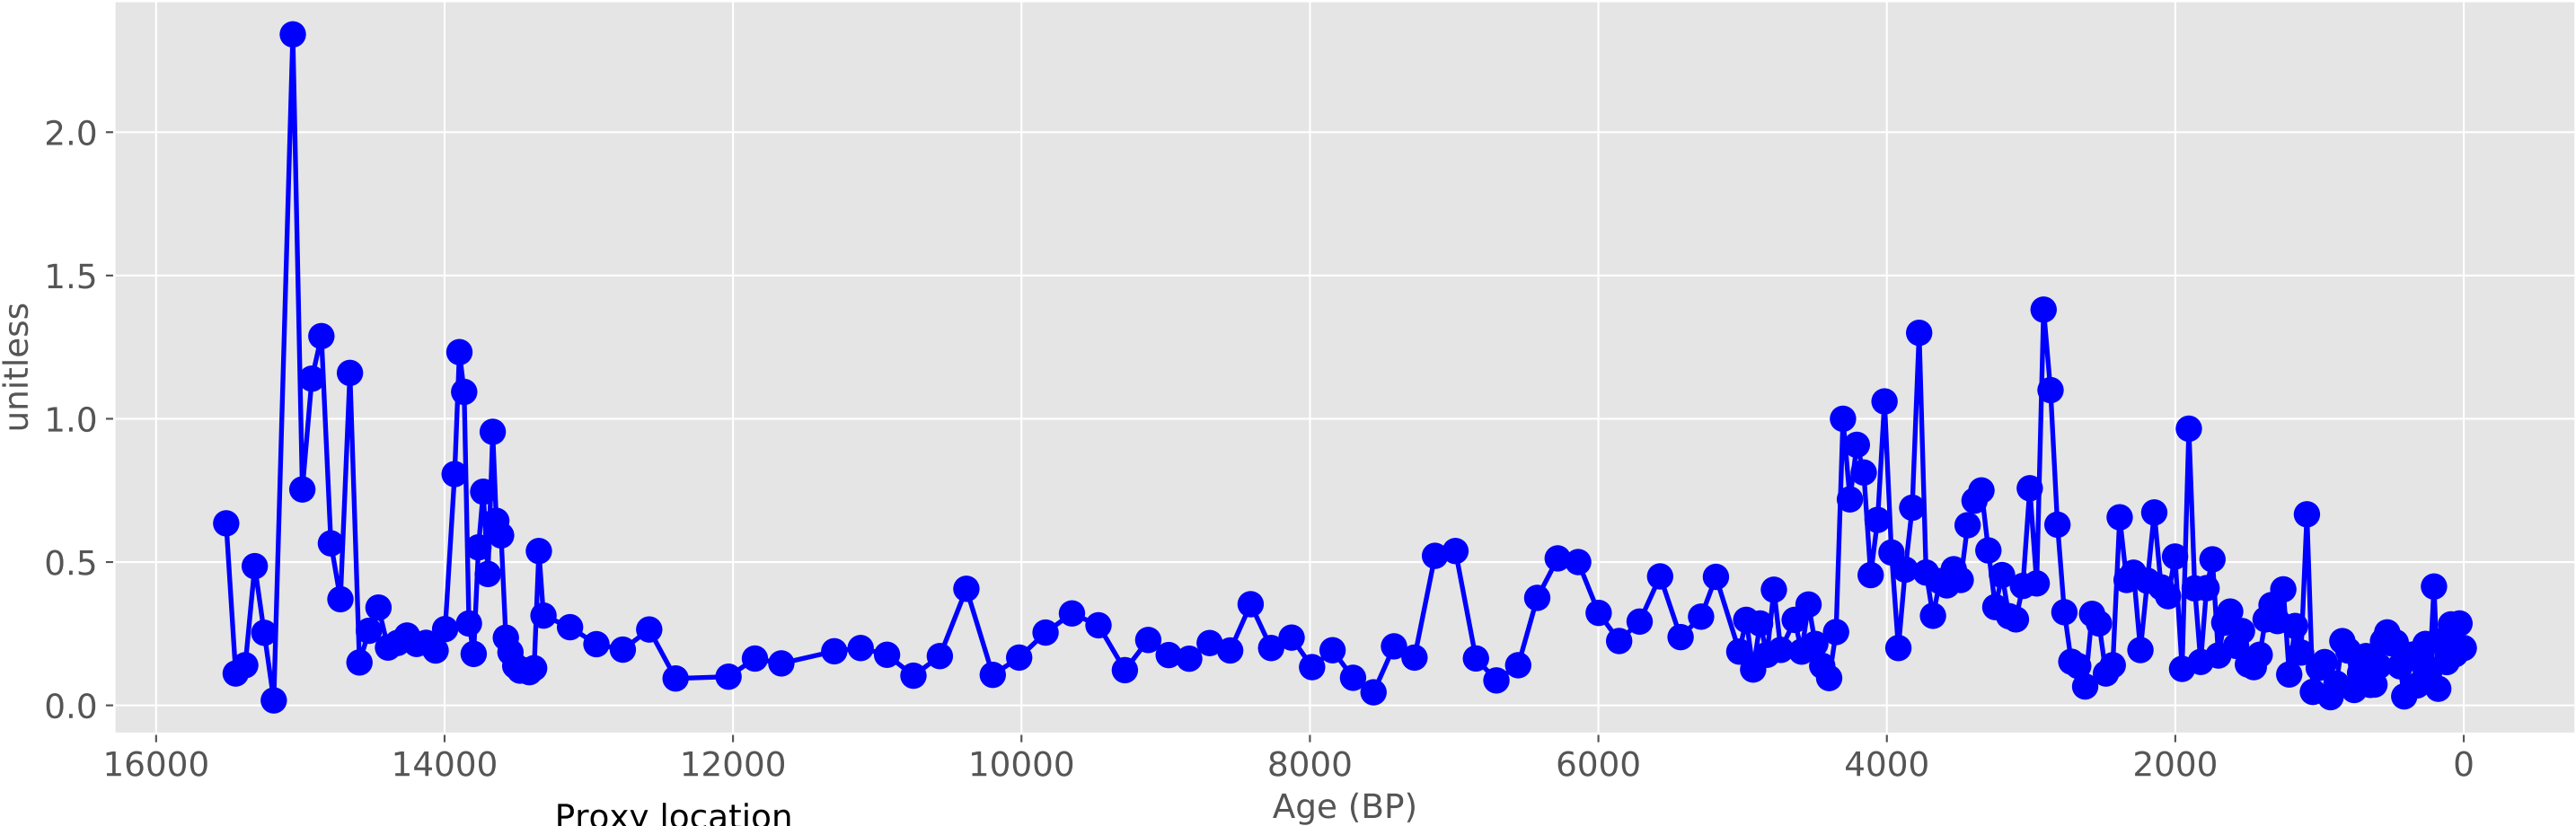

Proxy location  
(39.33 ° N, 106.13 ° W)



|                    |                                                       |
|--------------------|-------------------------------------------------------|
| Dataset name:      | KiteLake.JimenezMoreno.2012                           |
| Archive type:      | LakeSediment                                          |
| Proxy type:        | pollen                                                |
| Variable name:     | Picea/Artemisia                                       |
| Latitude ( ° N):   | 39.3295                                               |
| Longitude ( ° E):  | -106.1298                                             |
| Elevation (m):     | 3668.0                                                |
| Interp. variable:  | T                                                     |
| Interp. detail:    | air@surface                                           |
| Interp. season:    | annual                                                |
| Interp. direction: | positive                                              |
| Pub. 1 title:      | Pollen and macrofossil evidence of Late Pleistocen... |
| Pub. 1 authors:    | Jiménez-Moreno, Gonzalo;Anderson, R Scott             |
| Pub. 1 year:       | 2012                                                  |
| Pub. 1 DOI:        | 10.1177/0959683612450199                              |
| Original data URL: | wNAm                                                  |

Proxy data and metadata

LakeSediment | pollen | KiteLake.JimenezMoreno.2012 | WEBcde157ca

Proxy time series: Picea/Pinus

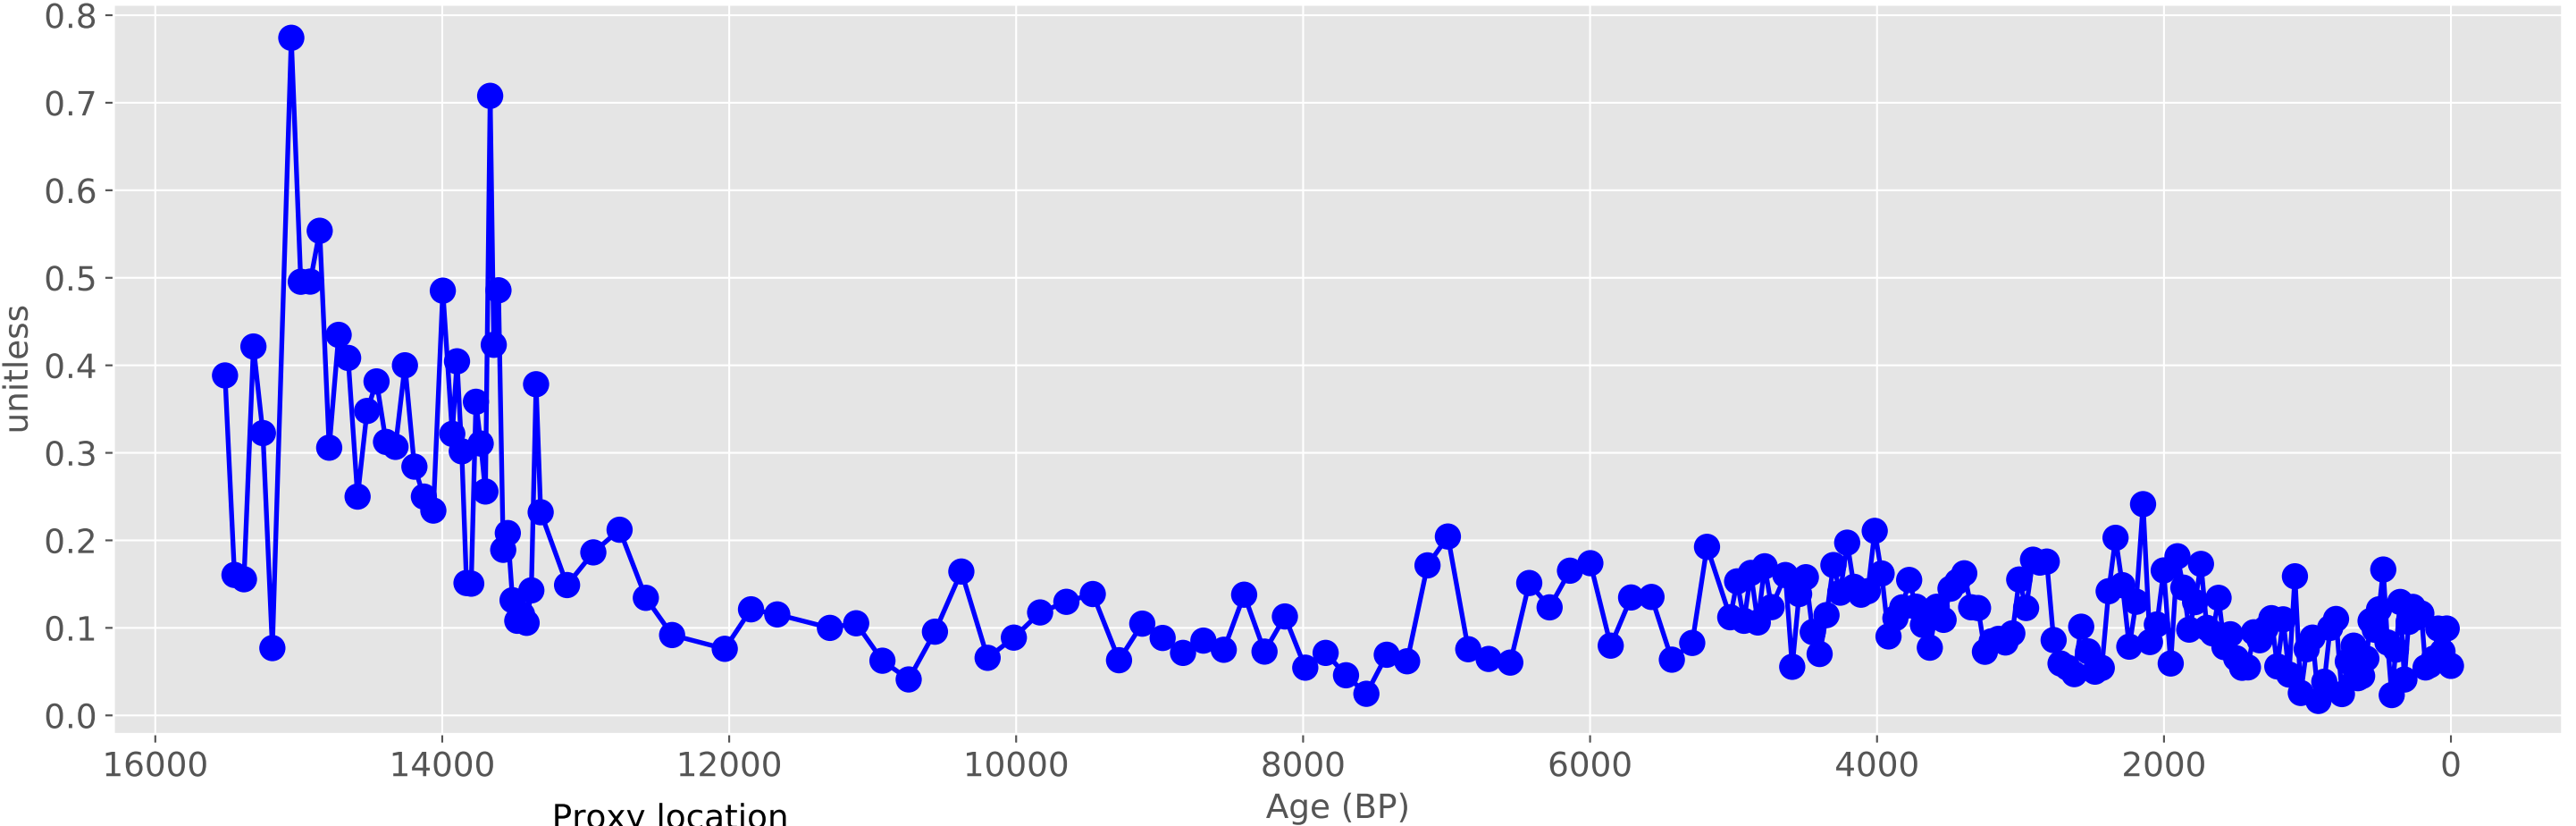

Proxy location  
(39.33 ° N, 106.13 ° W)



|                    |                                                       |
|--------------------|-------------------------------------------------------|
| Dataset name:      | KiteLake.JimenezMoreno.2012                           |
| Archive type:      | LakeSediment                                          |
| Proxy type:        | pollen                                                |
| Variable name:     | Picea/Pinus                                           |
| Latitude ( ° N):   | 39.3295                                               |
| Longitude ( ° E):  | -106.1298                                             |
| Elevation (m):     | 3668.0                                                |
| Interp. variable:  | T                                                     |
| Interp. detail:    | air@surface                                           |
| Interp. season:    | annual                                                |
| Interp. direction: | negative                                              |
| Pub. 1 title:      | Pollen and macrofossil evidence of Late Pleistocen... |
| Pub. 1 authors:    | Jiménez-Moreno, Gonzalo;Anderson, R Scott             |
| Pub. 1 year:       | 2012                                                  |
| Pub. 1 DOI:        | 10.1177/0959683612450199                              |
| Original data URL: | wNAm                                                  |

Proxy data and metadata

LakeSediment | pollen | KiteLake.JimenezMoreno.2012 | WEBebf73cc4

Proxy time series: Pinus/Artemisia

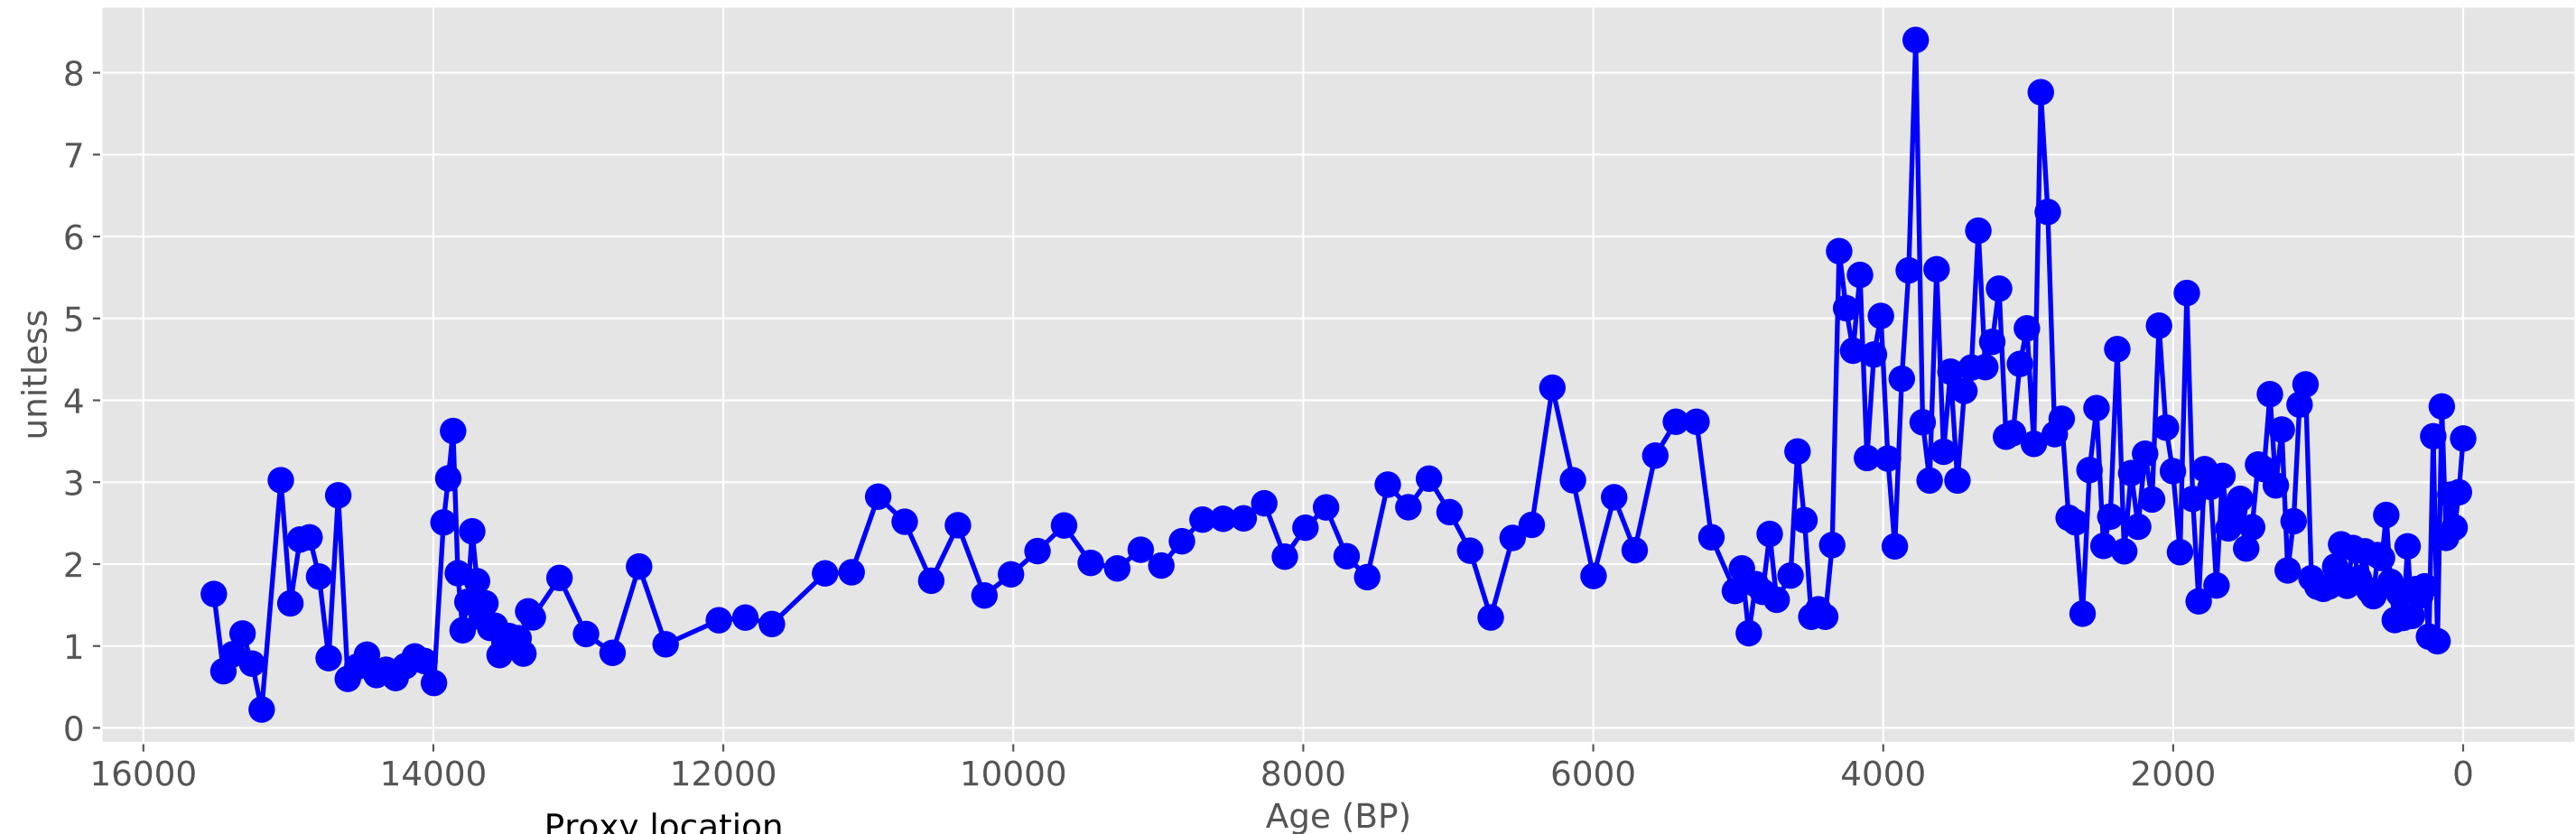

Proxy location  
(39.33 ° N, 106.13 ° W)

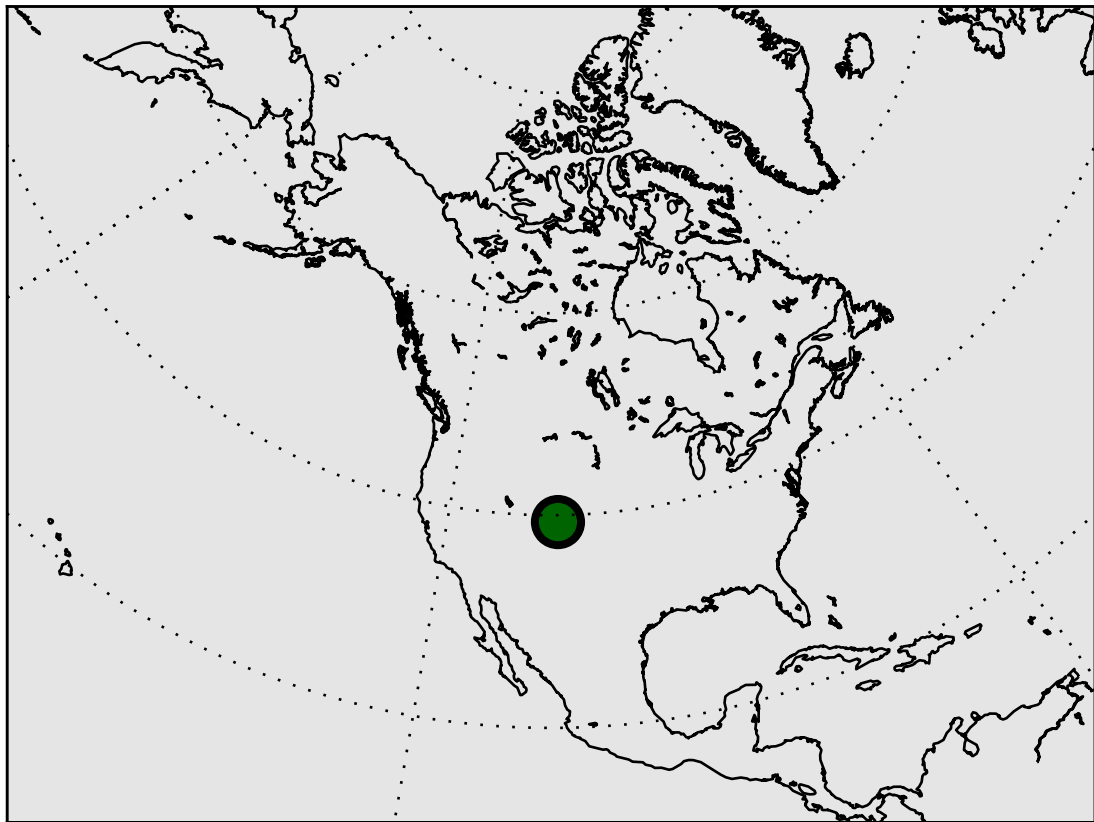

|                    |                                                       |
|--------------------|-------------------------------------------------------|
| Dataset name:      | KiteLake.JimenezMoreno.2012                           |
| Archive type:      | LakeSediment                                          |
| Proxy type:        | pollen                                                |
| Variable name:     | Pinus/Artemisia                                       |
| Latitude ( ° N):   | 39.3295                                               |
| Longitude ( ° E):  | -106.1298                                             |
| Elevation (m):     | 3668.0                                                |
| Interp. variable:  | T                                                     |
| Interp. detail:    | air@surface                                           |
| Interp. season:    | annual                                                |
| Interp. direction: | positive                                              |
| Pub. 1 title:      | Pollen and macrofossil evidence of Late Pleistocen... |
| Pub. 1 authors:    | Jiménez-Moreno, Gonzalo;Anderson, R Scott             |
| Pub. 1 year:       | 2012                                                  |
| Pub. 1 DOI:        | 10.1177/0959683612450199                              |
| Original data URL: | wNAm                                                  |



Proxy data and metadata  
LakeSediment | pollen | EmeraldLake.JimenezMoreno.2019 | WEB1a37b9bd

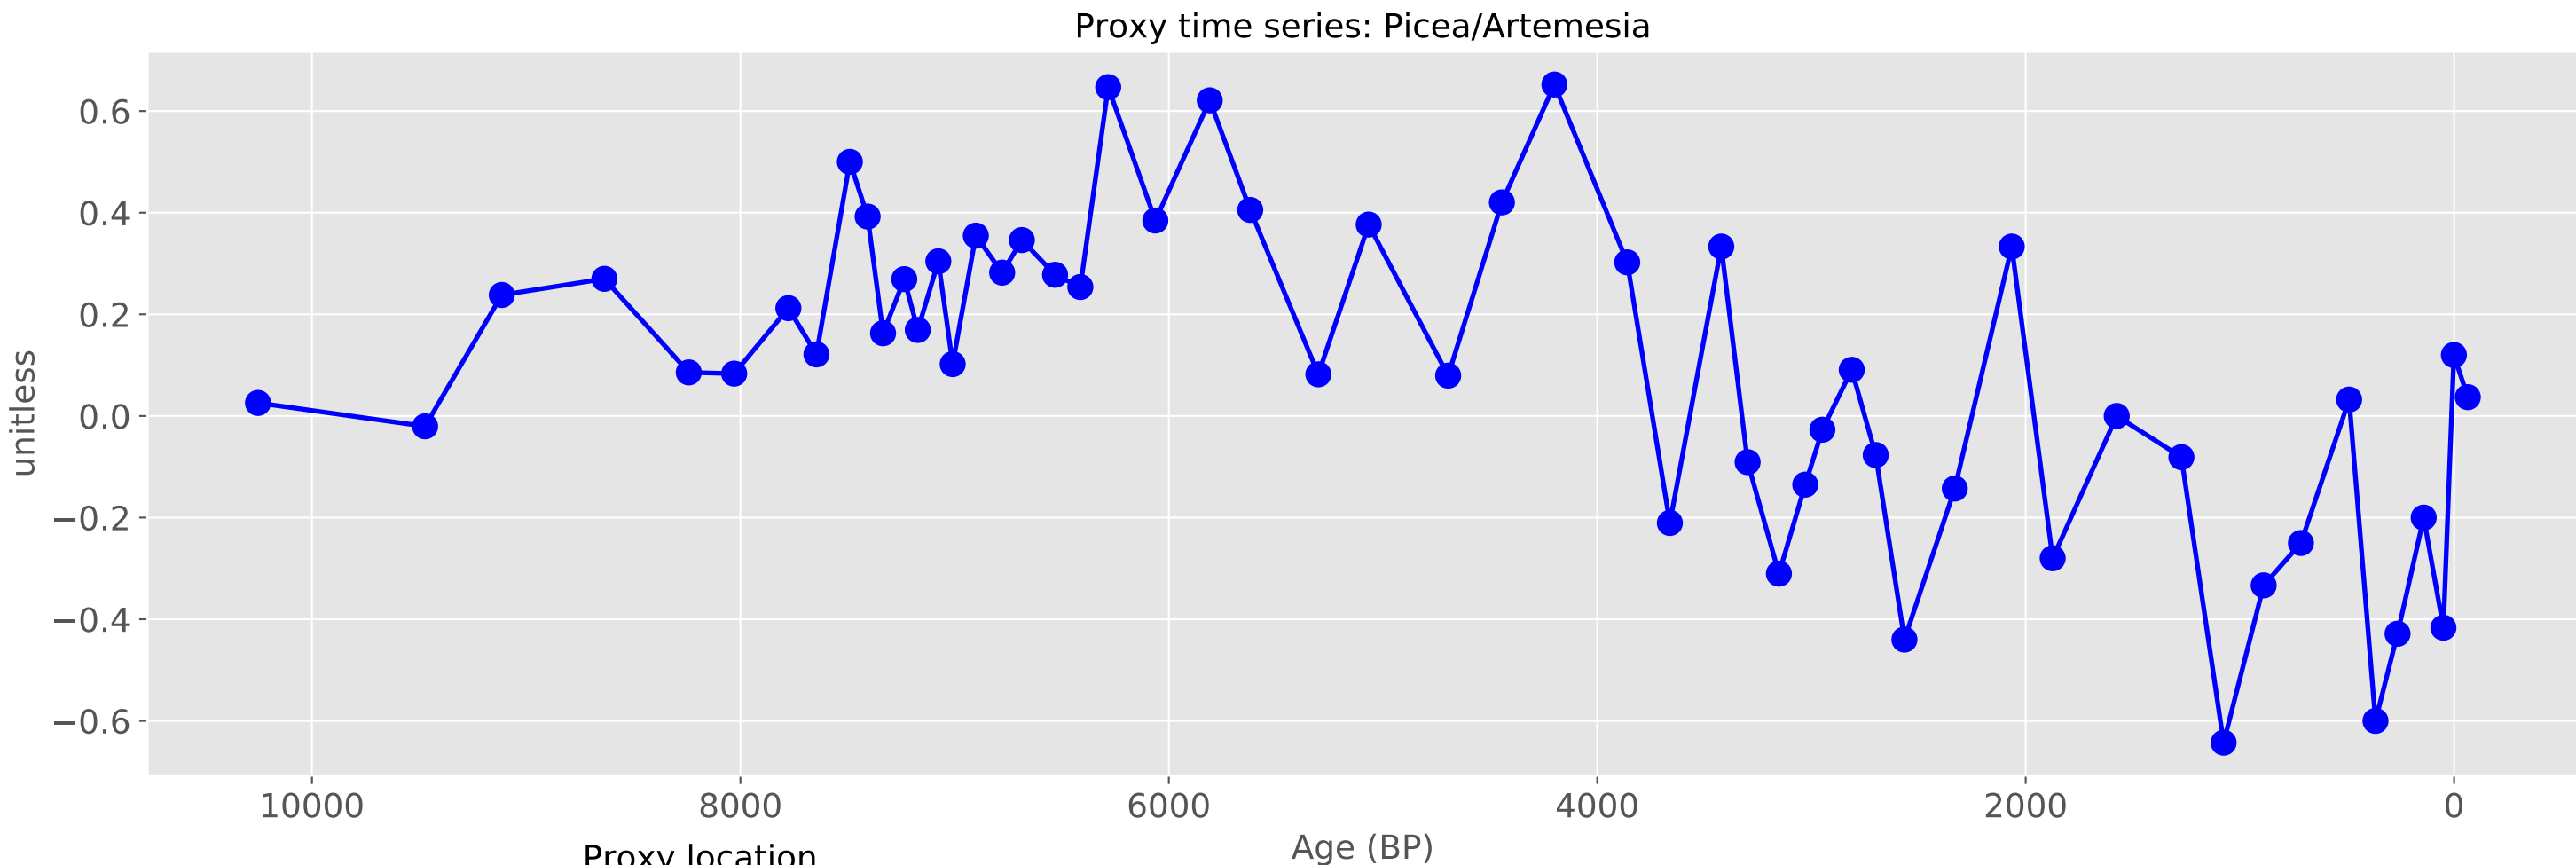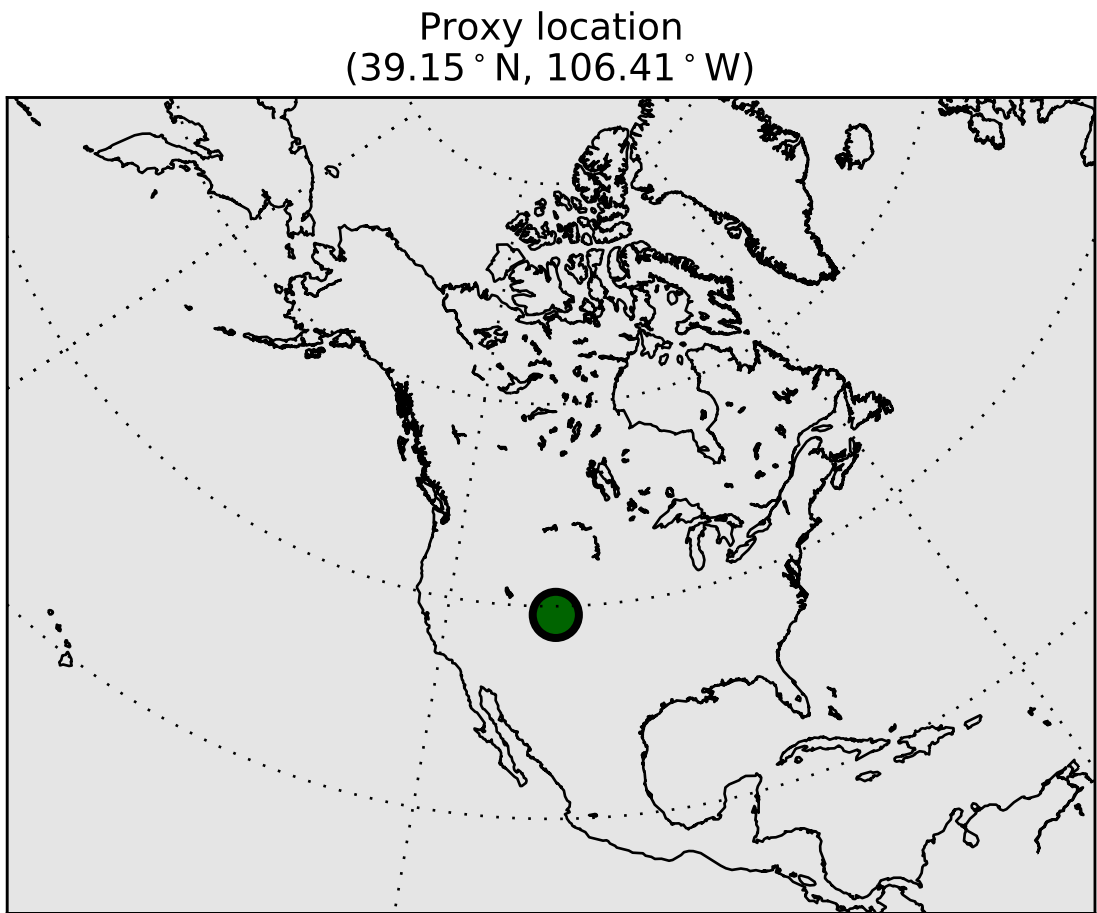

|                    |                                                       |
|--------------------|-------------------------------------------------------|
| Dataset name:      | EmeraldLake.JimenezMoreno.2019                        |
| Archive type:      | LakeSediment                                          |
| Proxy type:        | pollen                                                |
| Variable name:     | Picea/Artemesia                                       |
| Latitude ( ° N):   | 39.1518                                               |
| Longitude ( ° E):  | -106.406                                              |
| Elevation (m):     | 3053.0                                                |
| Interp. variable:  | T                                                     |
| Interp. detail:    | air@surface                                           |
| Interp. season:    | annual                                                |
| Interp. direction: | positive                                              |
| Pub. 1 title:      | Forest and lake dynamics in response to temperatur... |
| Pub. 1 authors:    | Jiménez-Moreno, Gonzalo;Anderson, R. Scott;Shuman,... |
| Pub. 1 year:       | 2019                                                  |
| Pub. 1 DOI:        | 10.1016/j.quascirev.2019.03.013                       |
| Original data URL: | wNA                                                   |

Proxy data and metadata  
LakeSediment | pollen | EmeraldLake.JimenezMoreno.2019 | WEB5e2b610d

Proxy time series: Pinyon

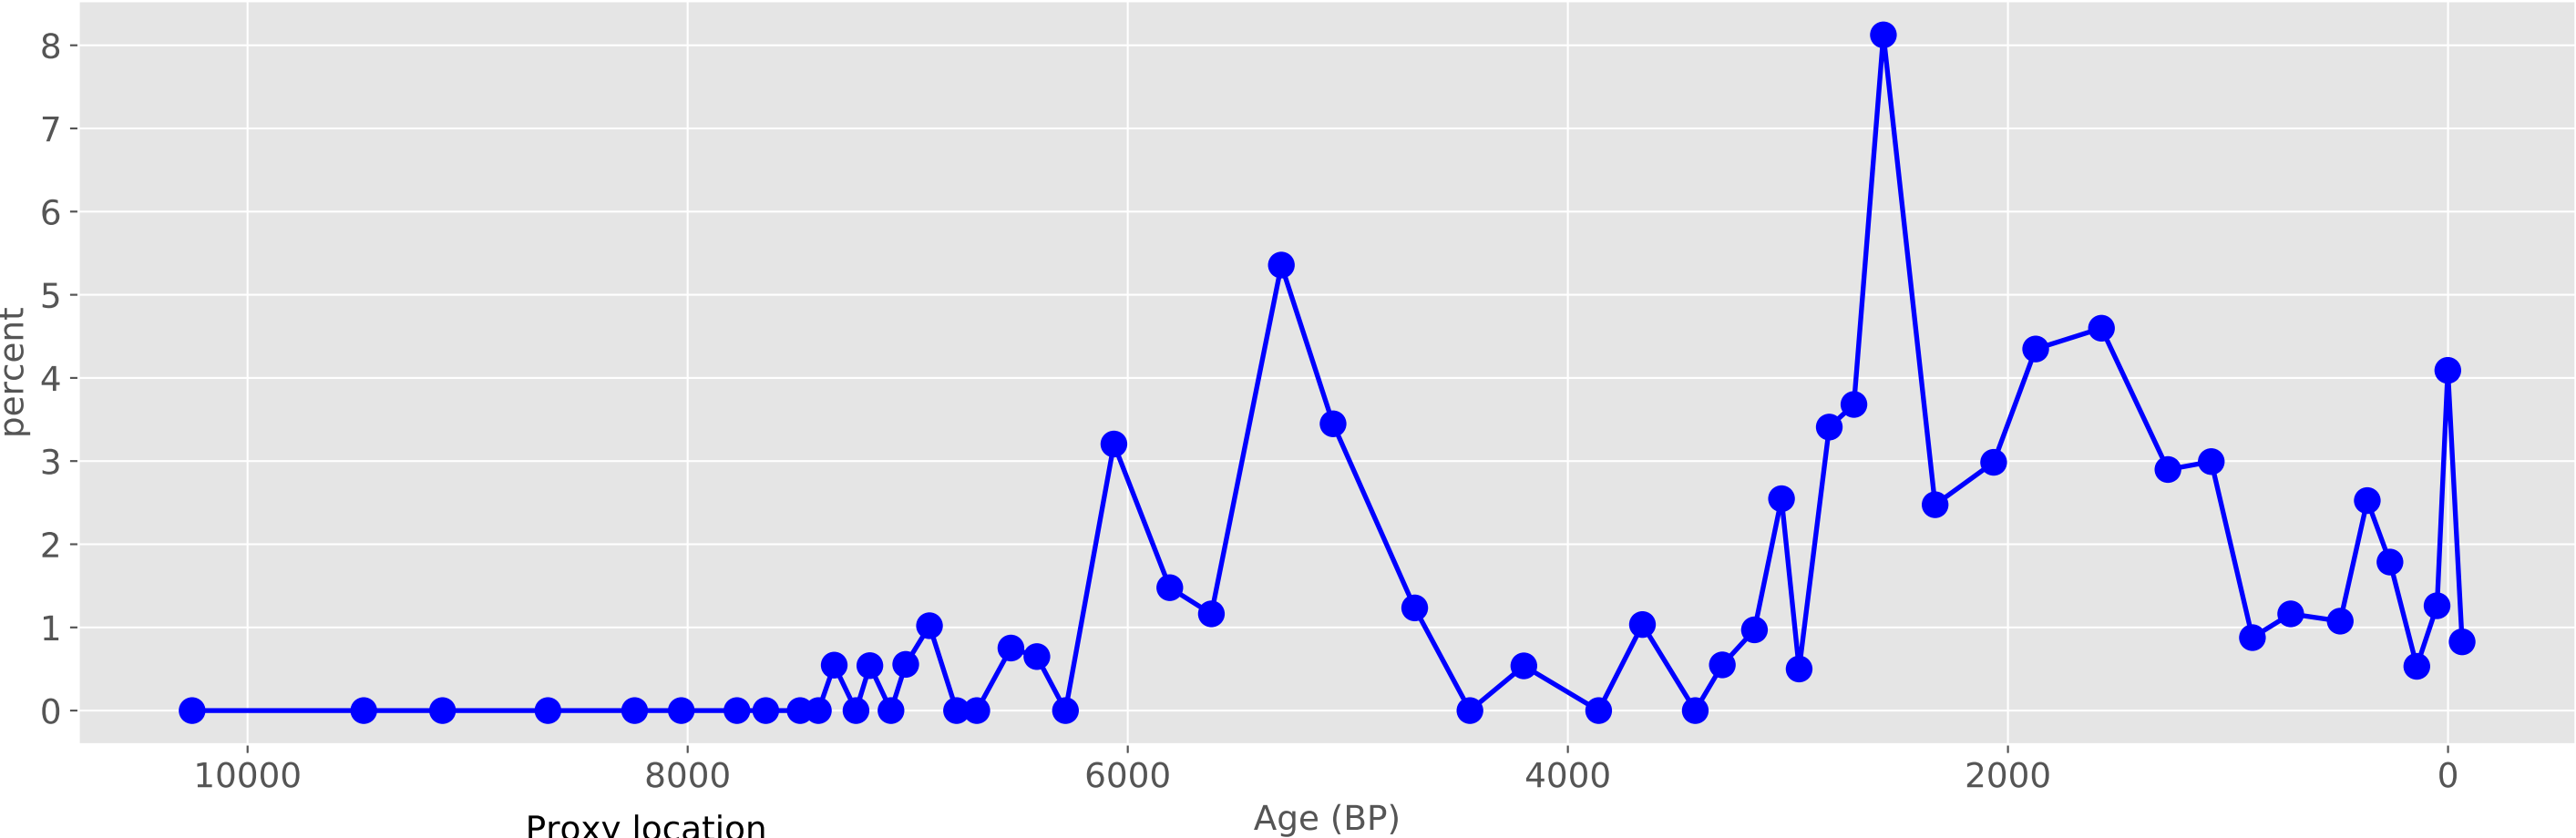

Proxy location  
(39.15 ° N, 106.41 ° W)

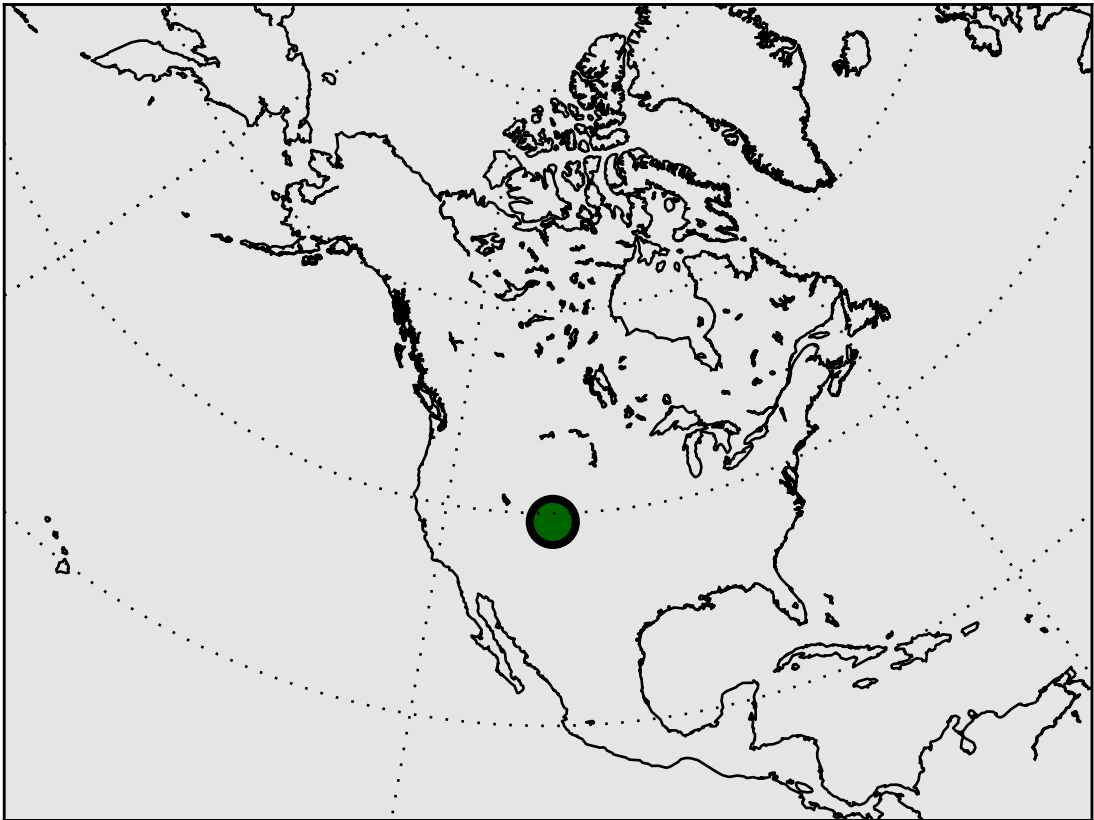

|                    |                                                       |
|--------------------|-------------------------------------------------------|
| Dataset name:      | EmeraldLake.JimenezMoreno.2019                        |
| Archive type:      | LakeSediment                                          |
| Proxy type:        | pollen                                                |
| Variable name:     | Pinyon                                                |
| Latitude ( ° N):   | 39.1518                                               |
| Longitude ( ° E):  | -106.406                                              |
| Elevation (m):     | 3053.0                                                |
| Interp. variable:  | P-E                                                   |
| Interp. detail:    | @surface                                              |
| Interp. season:    | winterOnly                                            |
| Interp. direction: | positive                                              |
| Pub. 1 title:      | Forest and lake dynamics in response to temperatur... |
| Pub. 1 authors:    | Jiménez-Moreno, Gonzalo;Anderson, R. Scott;Shuman,... |
| Pub. 1 year:       | 2019                                                  |
| Pub. 1 DOI:        | 10.1016/j.quascirev.2019.03.013                       |
| Original data URL: | wNAm                                                  |

Proxy data and metadata  
LakeSediment | pollen | EmeraldLake.JimenezMoreno.2019 | WEB89946a29

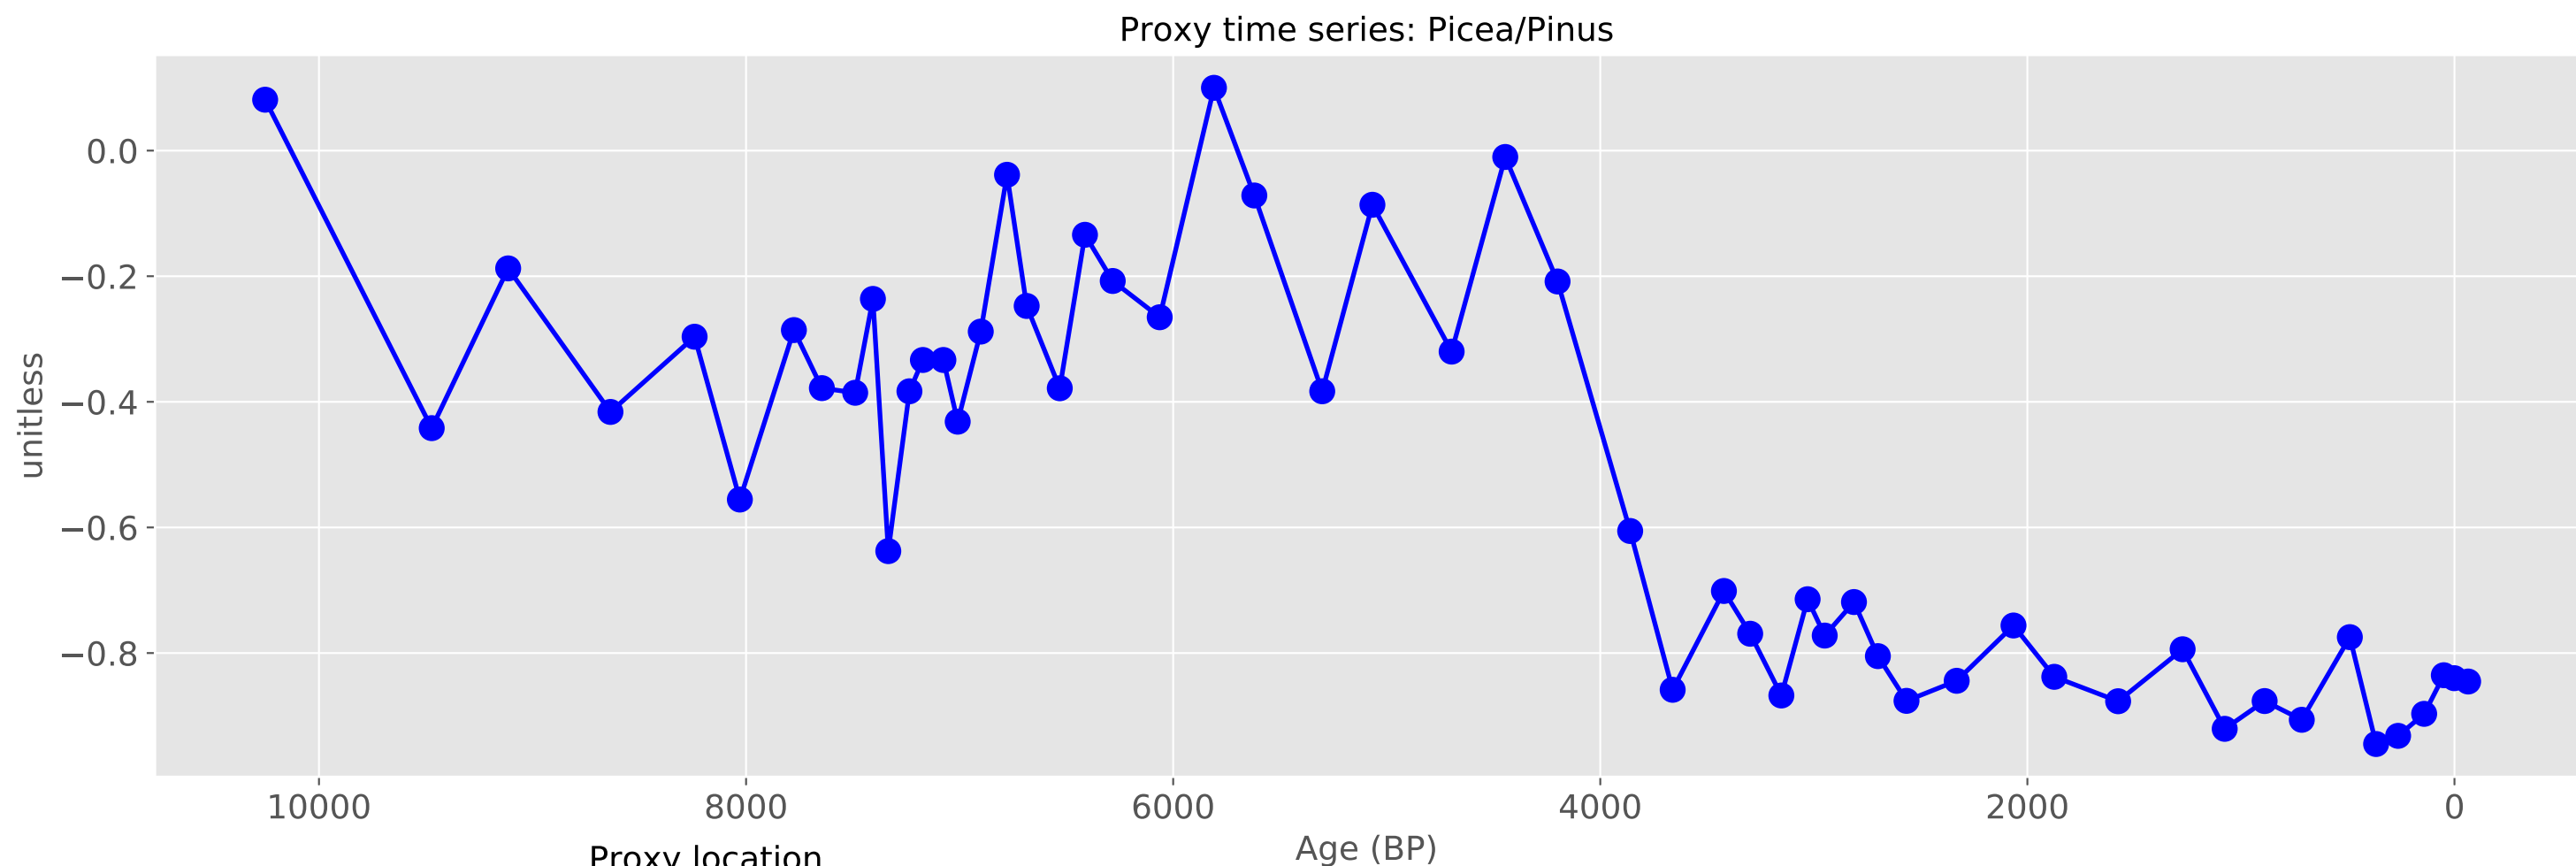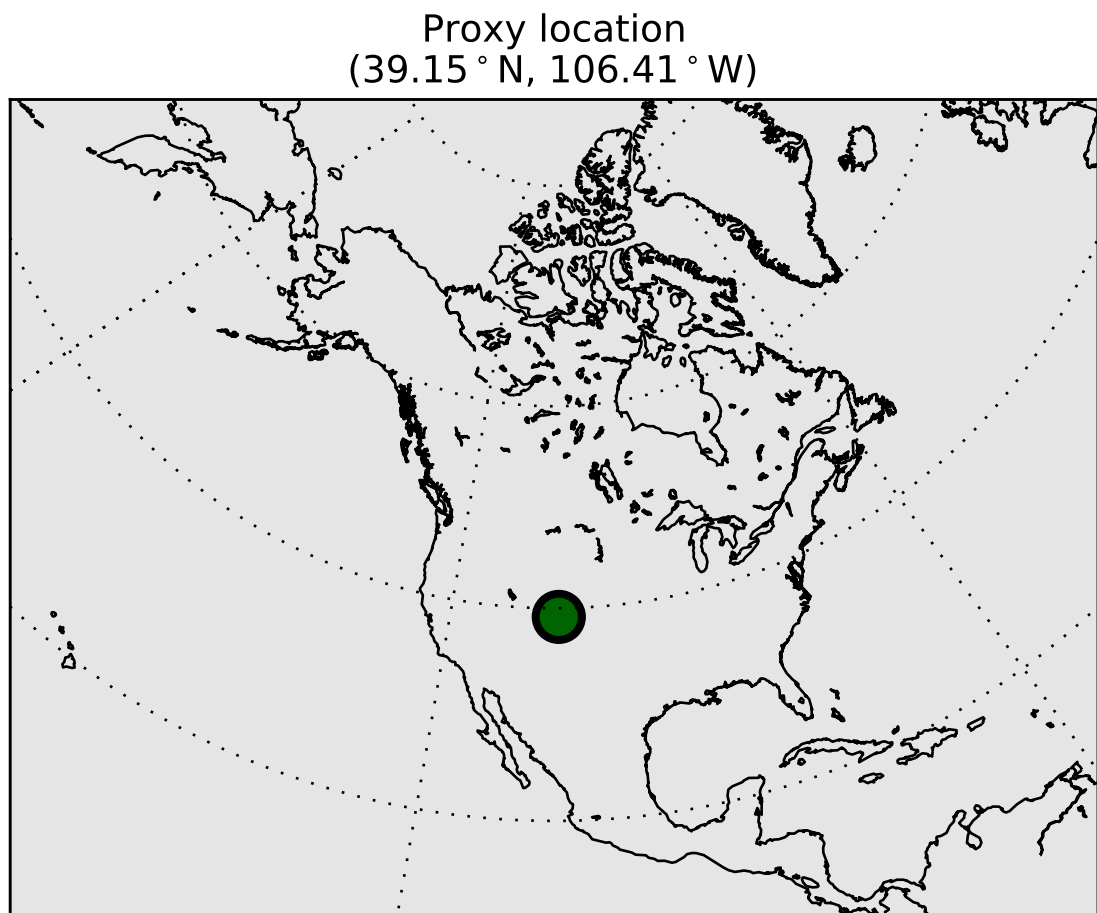

|                    |                                                       |
|--------------------|-------------------------------------------------------|
| Dataset name:      | EmeraldLake.JimenezMoreno.2019                        |
| Archive type:      | LakeSediment                                          |
| Proxy type:        | pollen                                                |
| Variable name:     | Picea/Pinus                                           |
| Latitude ( ° N):   | 39.1518                                               |
| Longitude ( ° E):  | -106.406                                              |
| Elevation (m):     | 3053.0                                                |
| Interp. variable:  | T                                                     |
| Interp. detail:    | air@surface                                           |
| Interp. season:    | annual                                                |
| Interp. direction: | positive                                              |
| Pub. 1 title:      | Forest and lake dynamics in response to temperatur... |
| Pub. 1 authors:    | Jiménez-Moreno, Gonzalo;Anderson, R. Scott;Shuman,... |
| Pub. 1 year:       | 2019                                                  |
| Pub. 1 DOI:        | 10.1016/j.quascirev.2019.03.013                       |
| Original data URL: | wNA                                                   |

Proxy data and metadata  
LakeSediment | pollen | EmeraldLake.JimenezMoreno.2019 | WEBa970a4b9

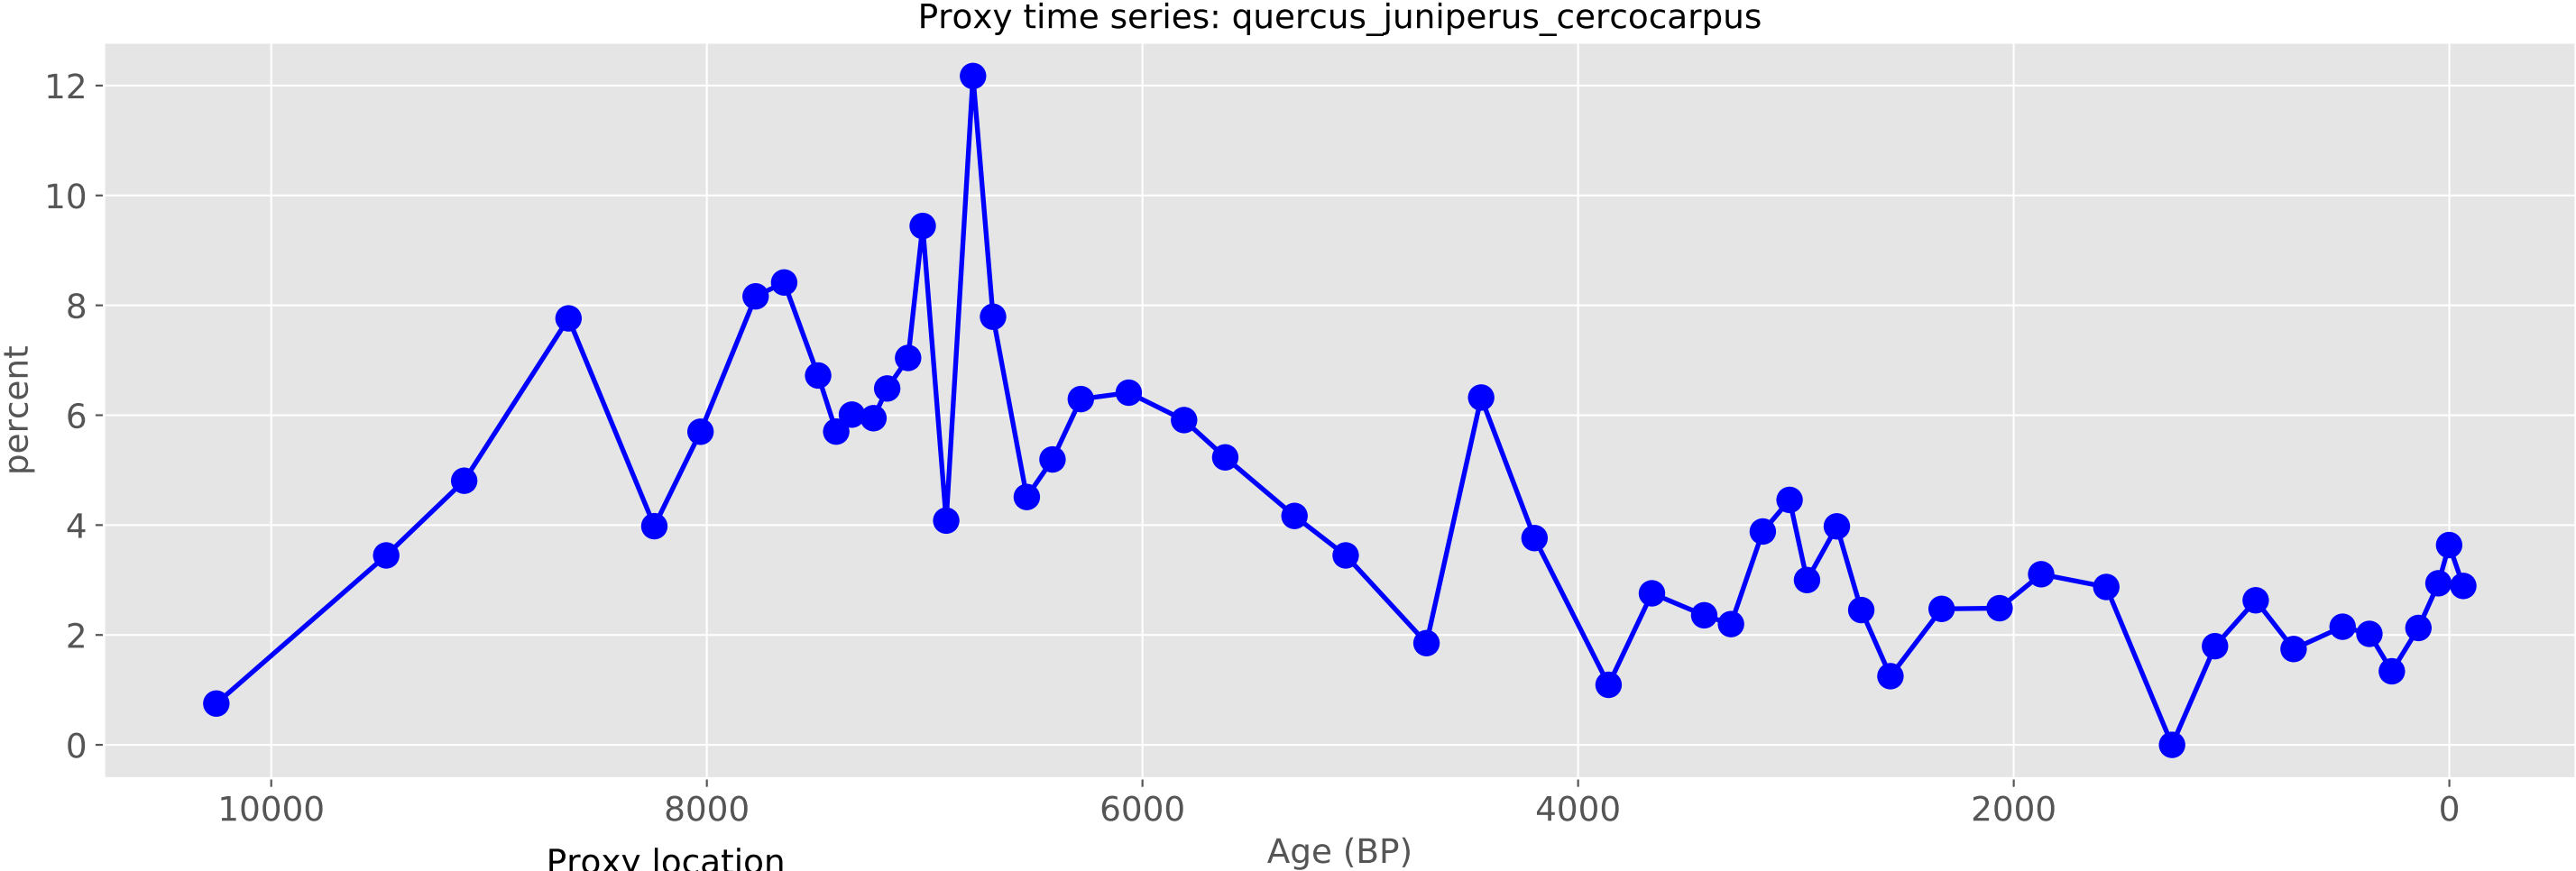

|                    |                                                       |
|--------------------|-------------------------------------------------------|
| Dataset name:      | EmeraldLake.JimenezMoreno.2019                        |
| Archive type:      | LakeSediment                                          |
| Proxy type:        | pollen                                                |
| Variable name:     | quercus_juniperus_cercocarpus                         |
| Latitude ( ° N):   | 39.1518                                               |
| Longitude ( ° E):  | -106.406                                              |
| Elevation (m):     | 3053.0                                                |
| Interp. variable:  | T                                                     |
| Interp. detail:    | air@surface                                           |
| Interp. season:    | annual                                                |
| Interp. direction: | positive                                              |
| Pub. 1 title:      | Forest and lake dynamics in response to temperatur... |
| Pub. 1 authors:    | Jiménez-Moreno, Gonzalo;Anderson, R. Scott;Shuman,... |
| Pub. 1 year:       | 2019                                                  |
| Pub. 1 DOI:        | 10.1016/j.quascirev.2019.03.013                       |
| Original data URL: | wNAm                                                  |

Proxy data and metadata  
LakeSediment | pollen | Copley.Fall.1997 | M2L4attyxxdP

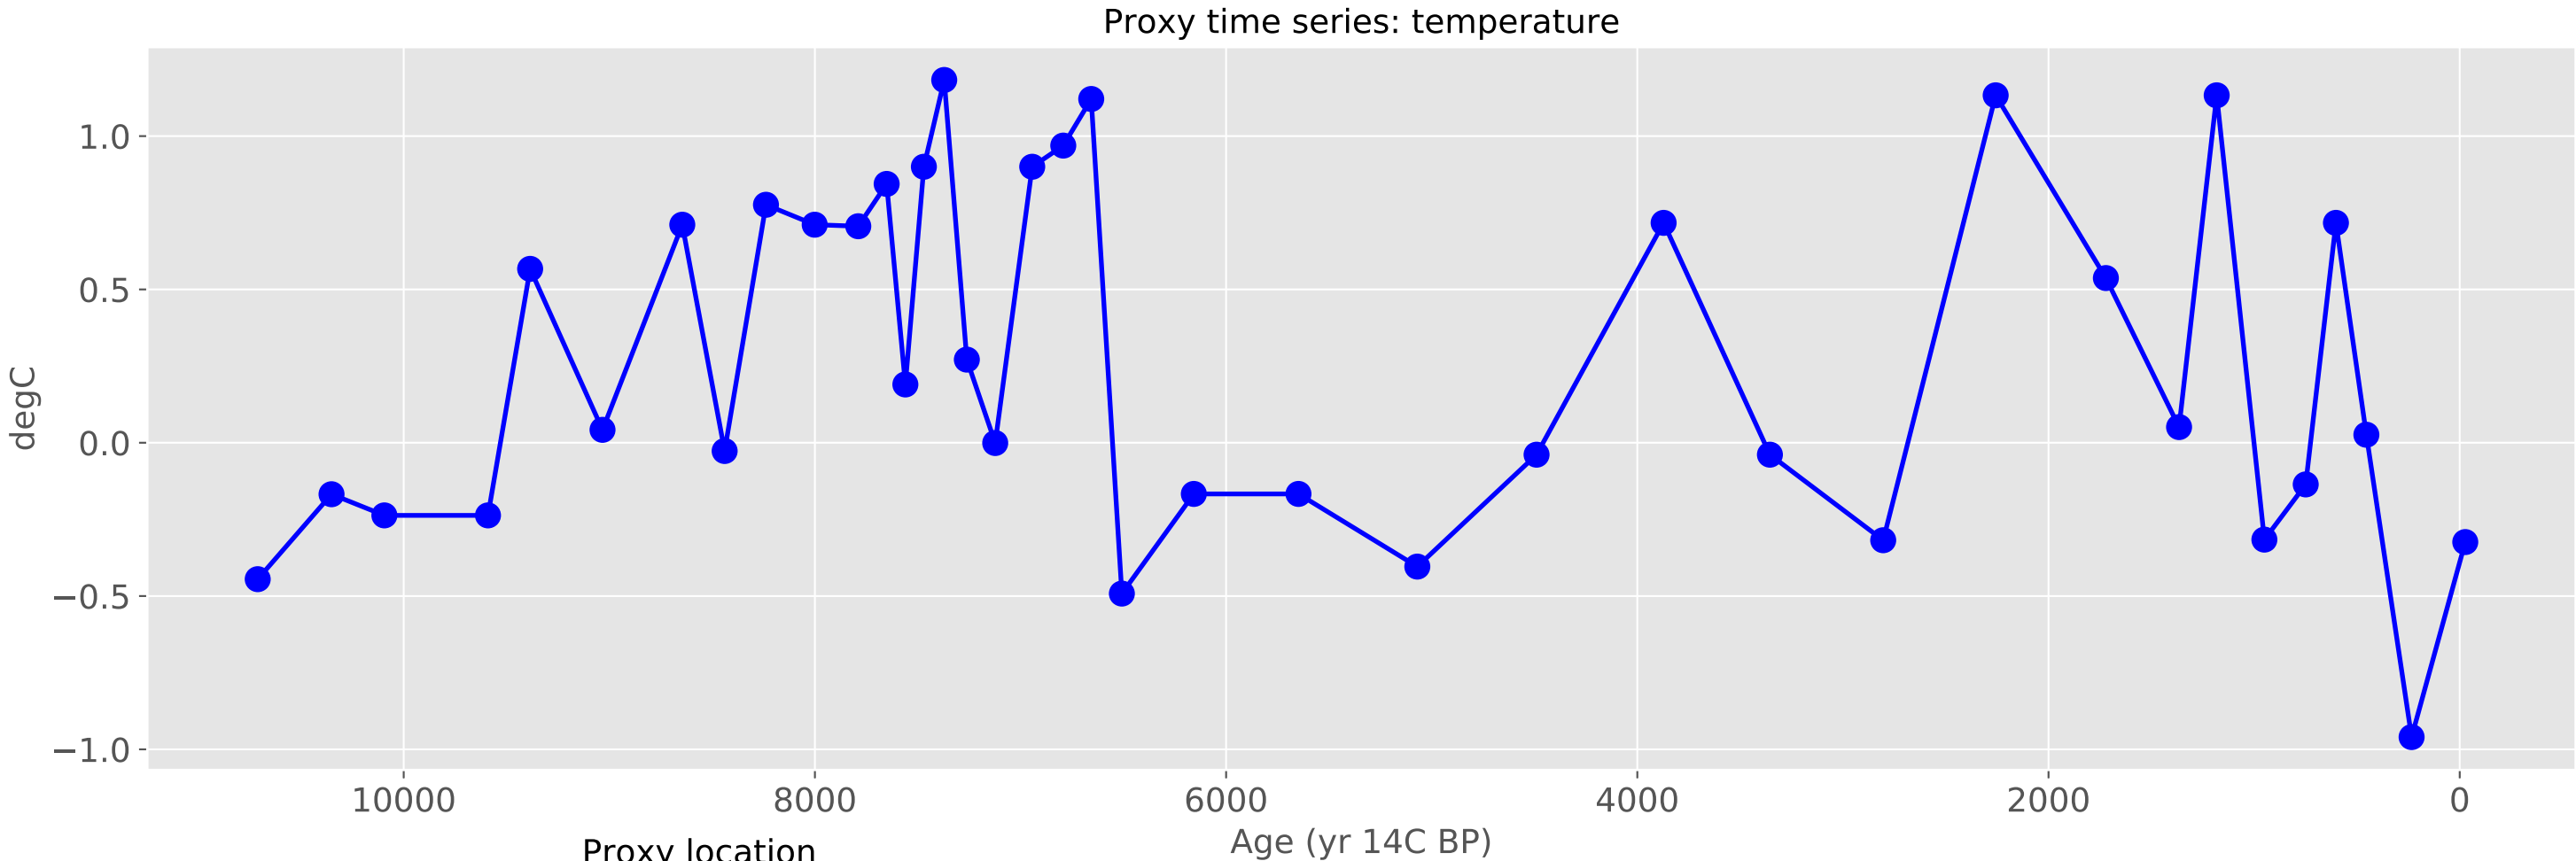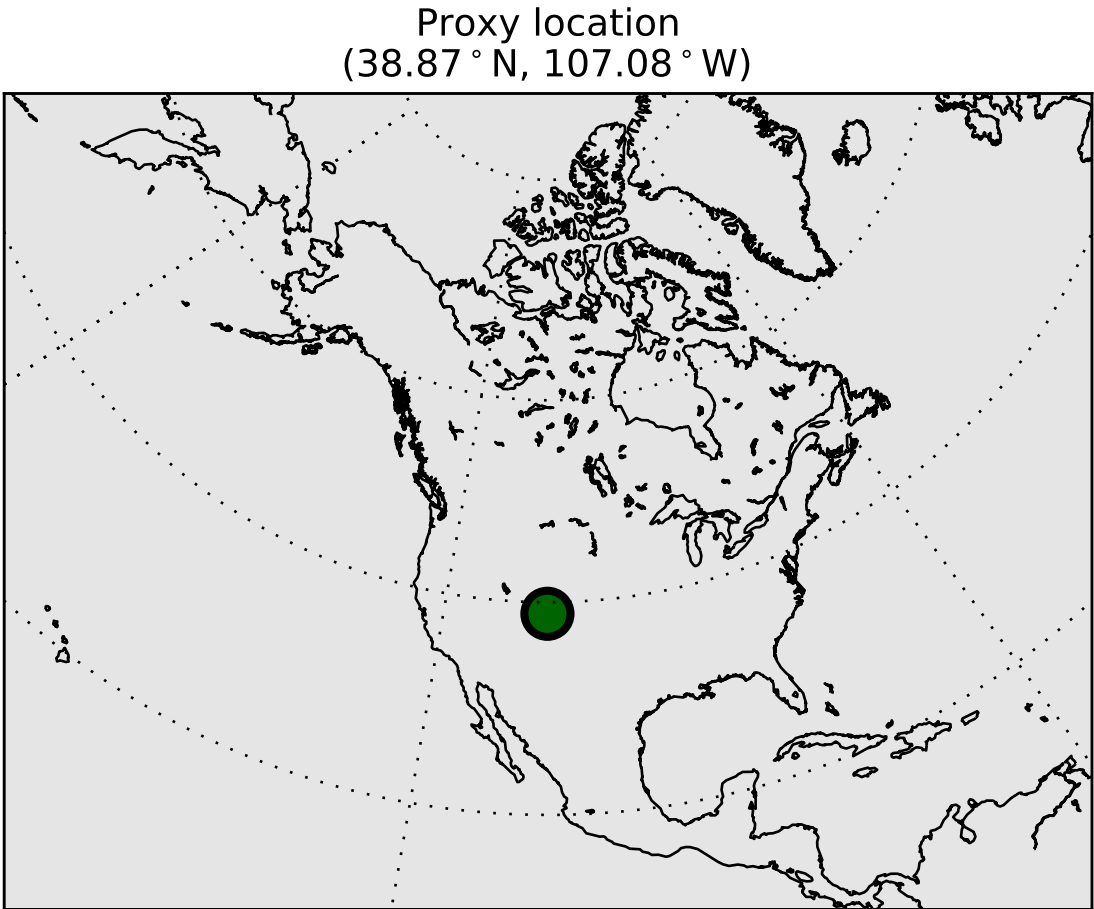

|                    |                                                       |
|--------------------|-------------------------------------------------------|
| Dataset name:      | Copley.Fall.1997                                      |
| Archive type:      | LakeSediment                                          |
| Proxy type:        | pollen                                                |
| Variable name:     | temperature                                           |
| Latitude ( ° N):   | 38.87                                                 |
| Longitude ( ° E):  | -107.08                                               |
| Elevation (m):     | 3250.0                                                |
| Interp. variable:  | T                                                     |
| Interp. detail:    | air@surface                                           |
| Interp. season:    | annual                                                |
| Interp. direction: | positive                                              |
| Pub. 1 title:      | Timberline fluctuations and late Quaternary paleoc... |
| Pub. 1 authors:    | Fall, Patricia L.                                     |
| Pub. 1 year:       | 1997                                                  |
| Pub. 1 DOI:        | 10.1130/0016-7606(1997)109<1306:TFALQP>2.3.CO;2       |
| Original data URL: | www.ncdc.noaa.gov/paleo/study/27330                   |

Proxy data and metadata  
LakeSediment | pollen | KeystoneIronbog.Fall.1985 | M2L54ah2uwsP

Proxy time series: temperature

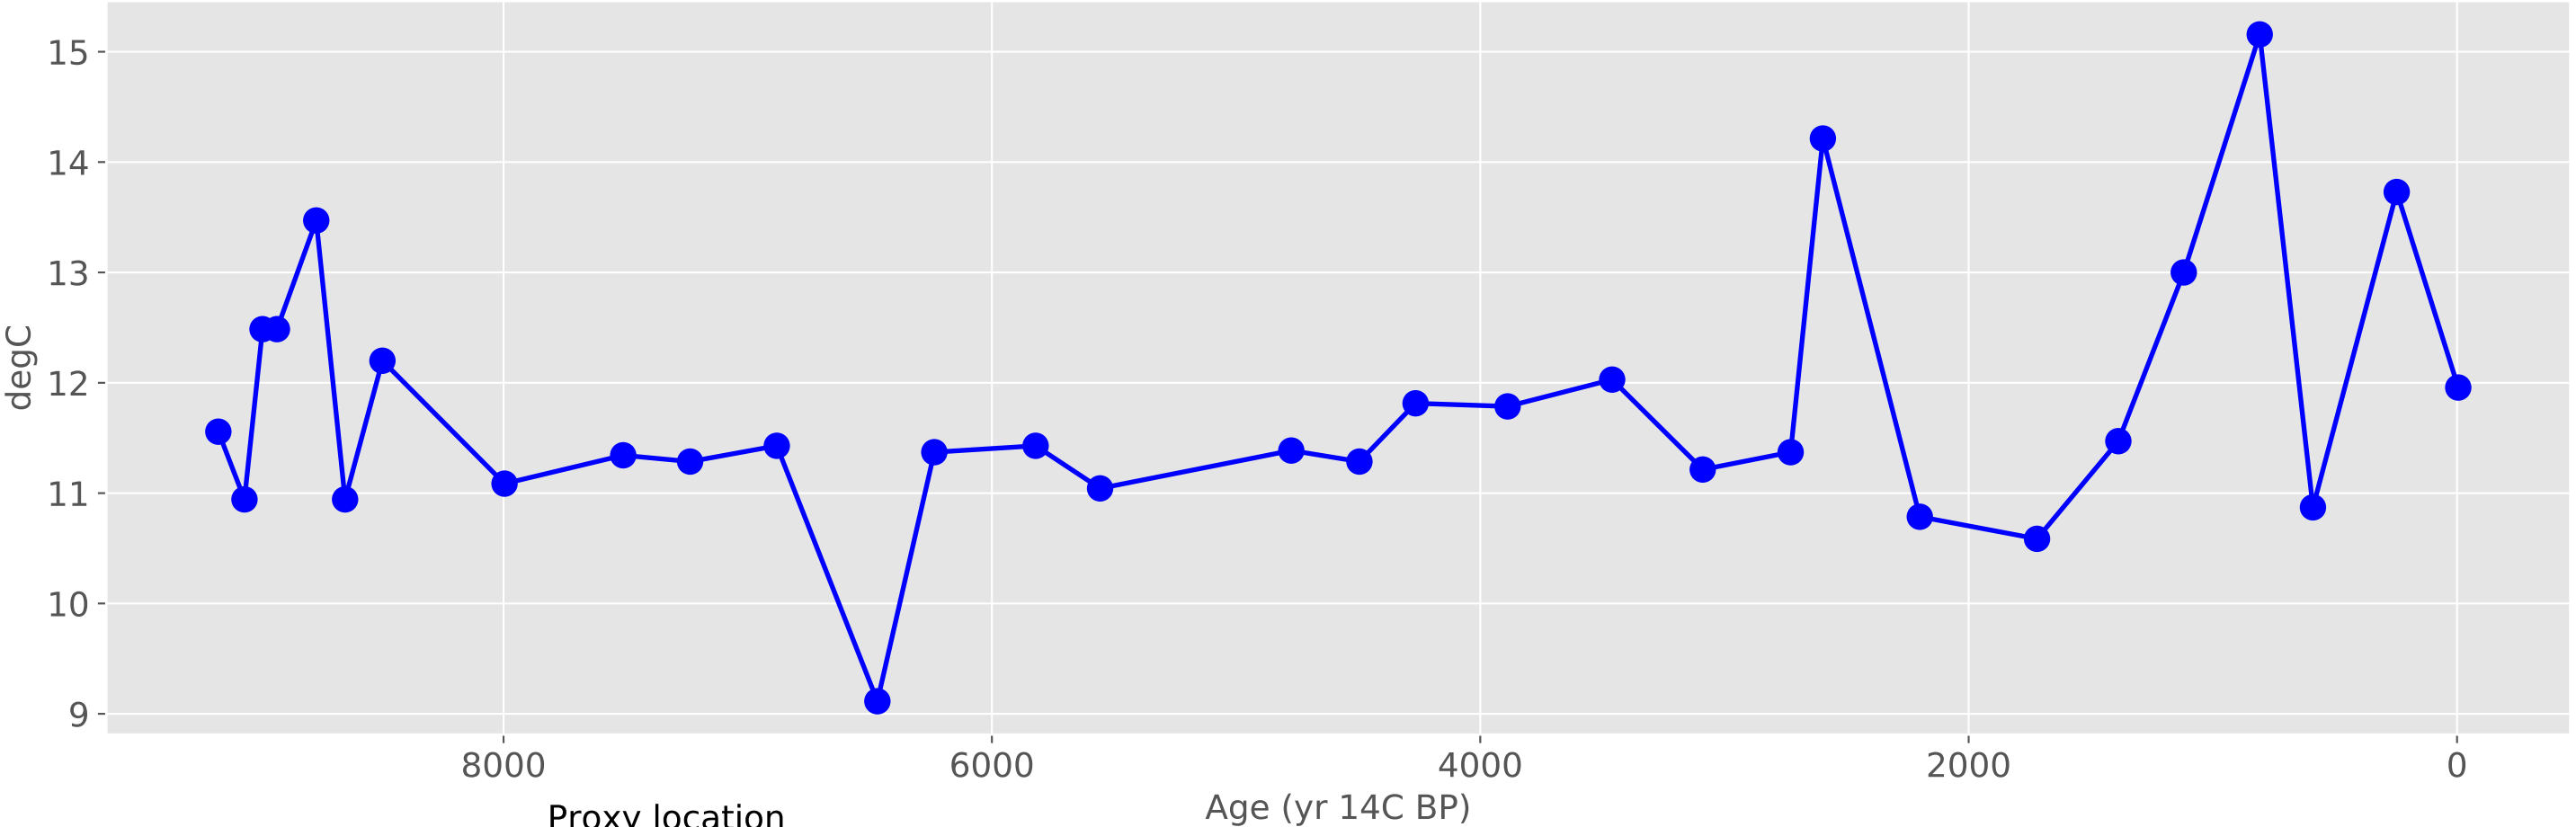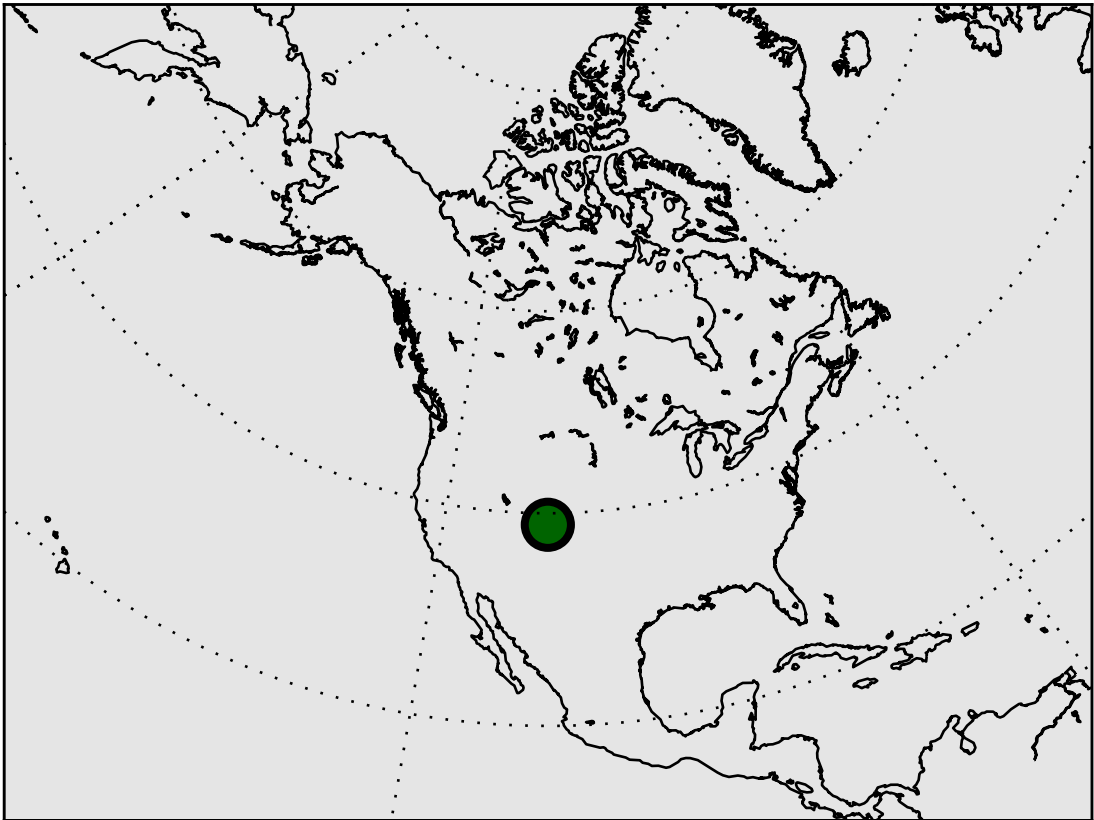

|                    |                                                                                              |
|--------------------|----------------------------------------------------------------------------------------------|
| Dataset name:      | KeystoneIronbog.Fall.1985                                                                    |
| Archive type:      | LakeSediment                                                                                 |
| Proxy type:        | pollen                                                                                       |
| Variable name:     | temperature                                                                                  |
| Latitude ( ° N):   | 38.87                                                                                        |
| Longitude ( ° E):  | -107.03                                                                                      |
| Elevation (m):     | 2920.0                                                                                       |
| Interp. variable:  | T                                                                                            |
| Interp. detail:    | air@surface                                                                                  |
| Interp. season:    | summer+                                                                                      |
| Interp. direction: | positive                                                                                     |
| Pub. 1 title:      | Vegetation dynamics in the southern Rocky Mountain...                                        |
| Pub. 1 authors:    | Fall, P.L.                                                                                   |
| Pub. 1 year:       | 1988                                                                                         |
| Pub. 1 DOI:        | Fall, P.L. 1985. Holocene dynamics of the subalpin...                                        |
| Original data URL: | <a href="http://www.ncdc.noaa.gov/paleo/study/27330">www.ncdc.noaa.gov/paleo/study/27330</a> |



Proxy data and metadata

LakeSediment | pollen | KeystoneIronbog.Fall.1985 | M2L8o4qa5uuP

Proxy time series: temperature

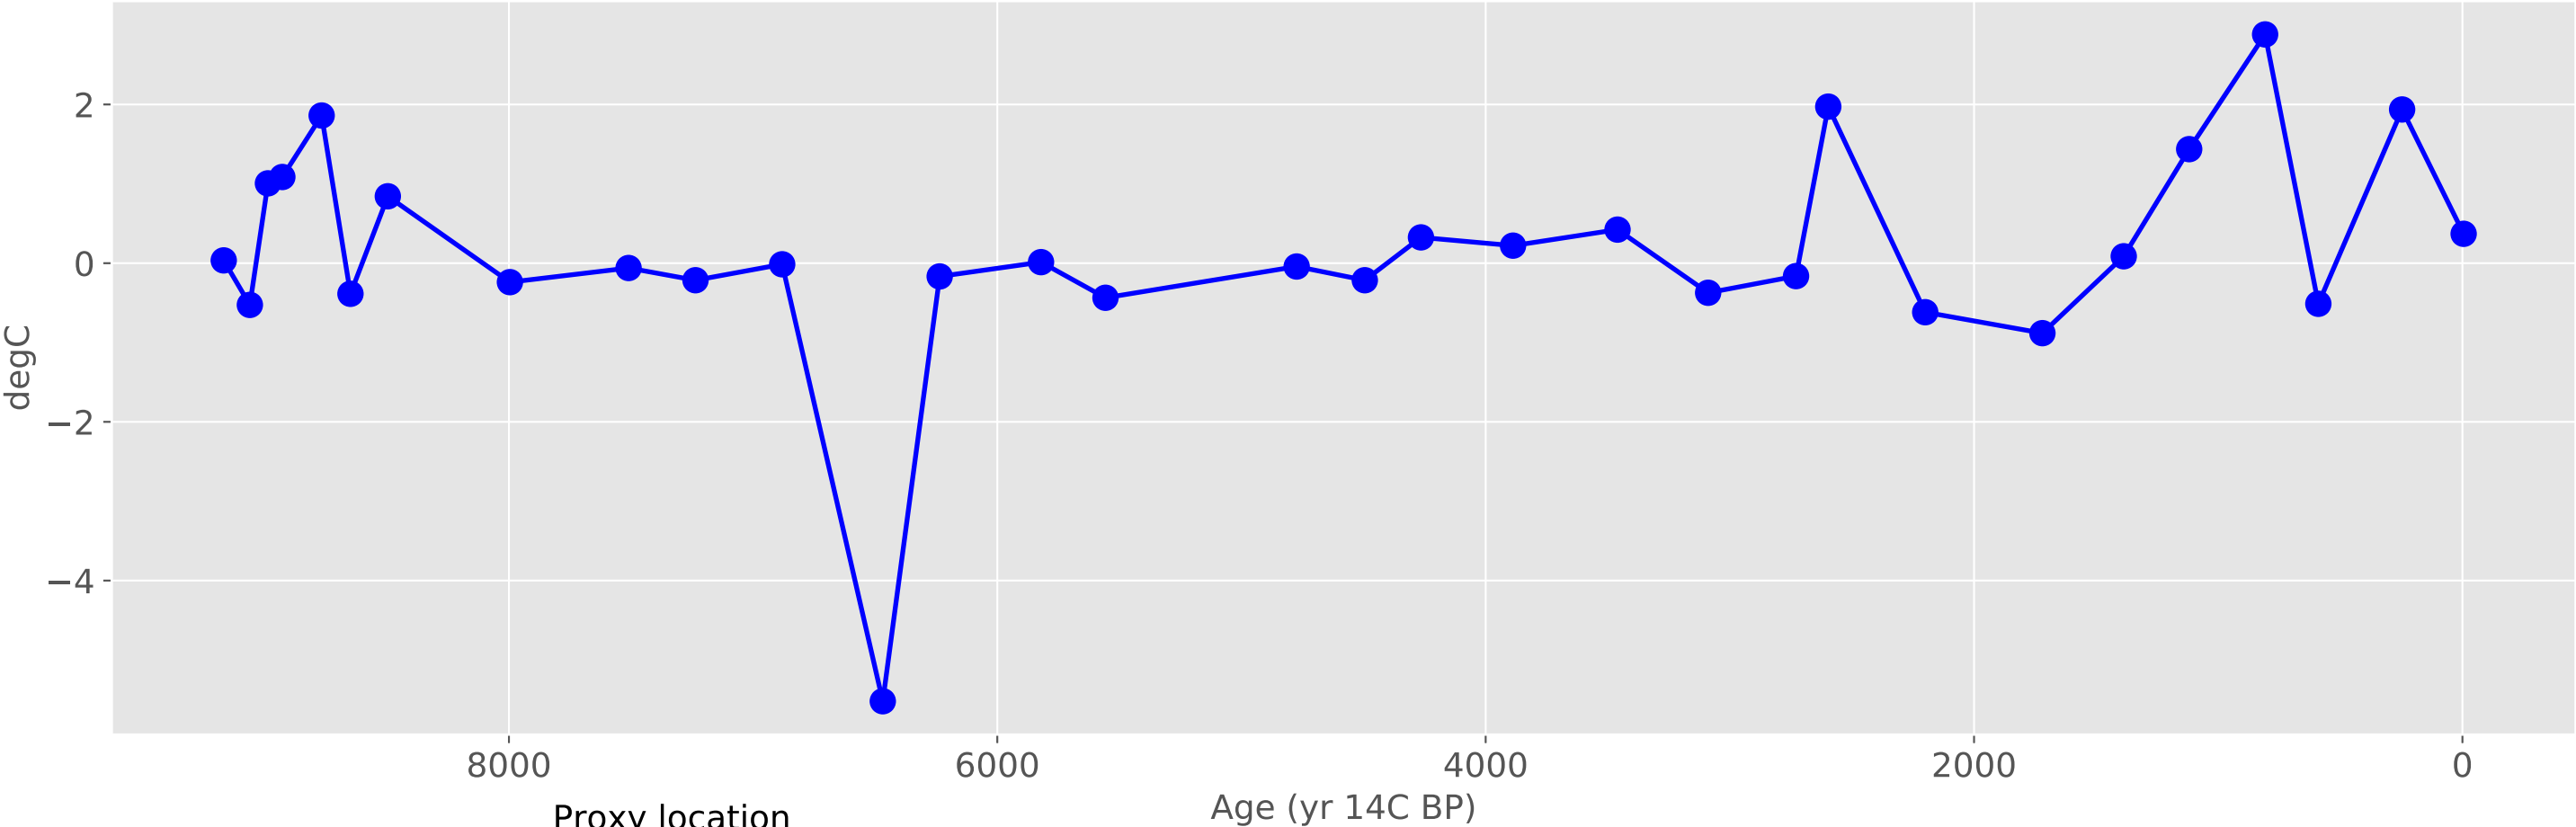

|                    |                                                                                              |
|--------------------|----------------------------------------------------------------------------------------------|
| Dataset name:      | KeystoneIronbog.Fall.1985                                                                    |
| Archive type:      | LakeSediment                                                                                 |
| Proxy type:        | pollen                                                                                       |
| Variable name:     | temperature                                                                                  |
| Latitude ( ° N):   | 38.87                                                                                        |
| Longitude ( ° E):  | -107.03                                                                                      |
| Elevation (m):     | 2920.0                                                                                       |
| Interp. variable:  | T                                                                                            |
| Interp. detail:    | air@surface                                                                                  |
| Interp. season:    | annual                                                                                       |
| Interp. direction: | positive                                                                                     |
| Pub. 1 title:      | Vegetation dynamics in the southern Rocky Mountain...                                        |
| Pub. 1 authors:    | Fall, P.L.                                                                                   |
| Pub. 1 year:       | 1988                                                                                         |
| Pub. 1 DOI:        | Fall, P.L. 1985. Holocene dynamics of the subalpin...                                        |
| Original data URL: | <a href="http://www.ncdc.noaa.gov/paleo/study/27330">www.ncdc.noaa.gov/paleo/study/27330</a> |

Proxy data and metadata  
LakeSediment | pollen | Copley.Fall.1997 | M2LombwlfxeP

Proxy time series: precipitation

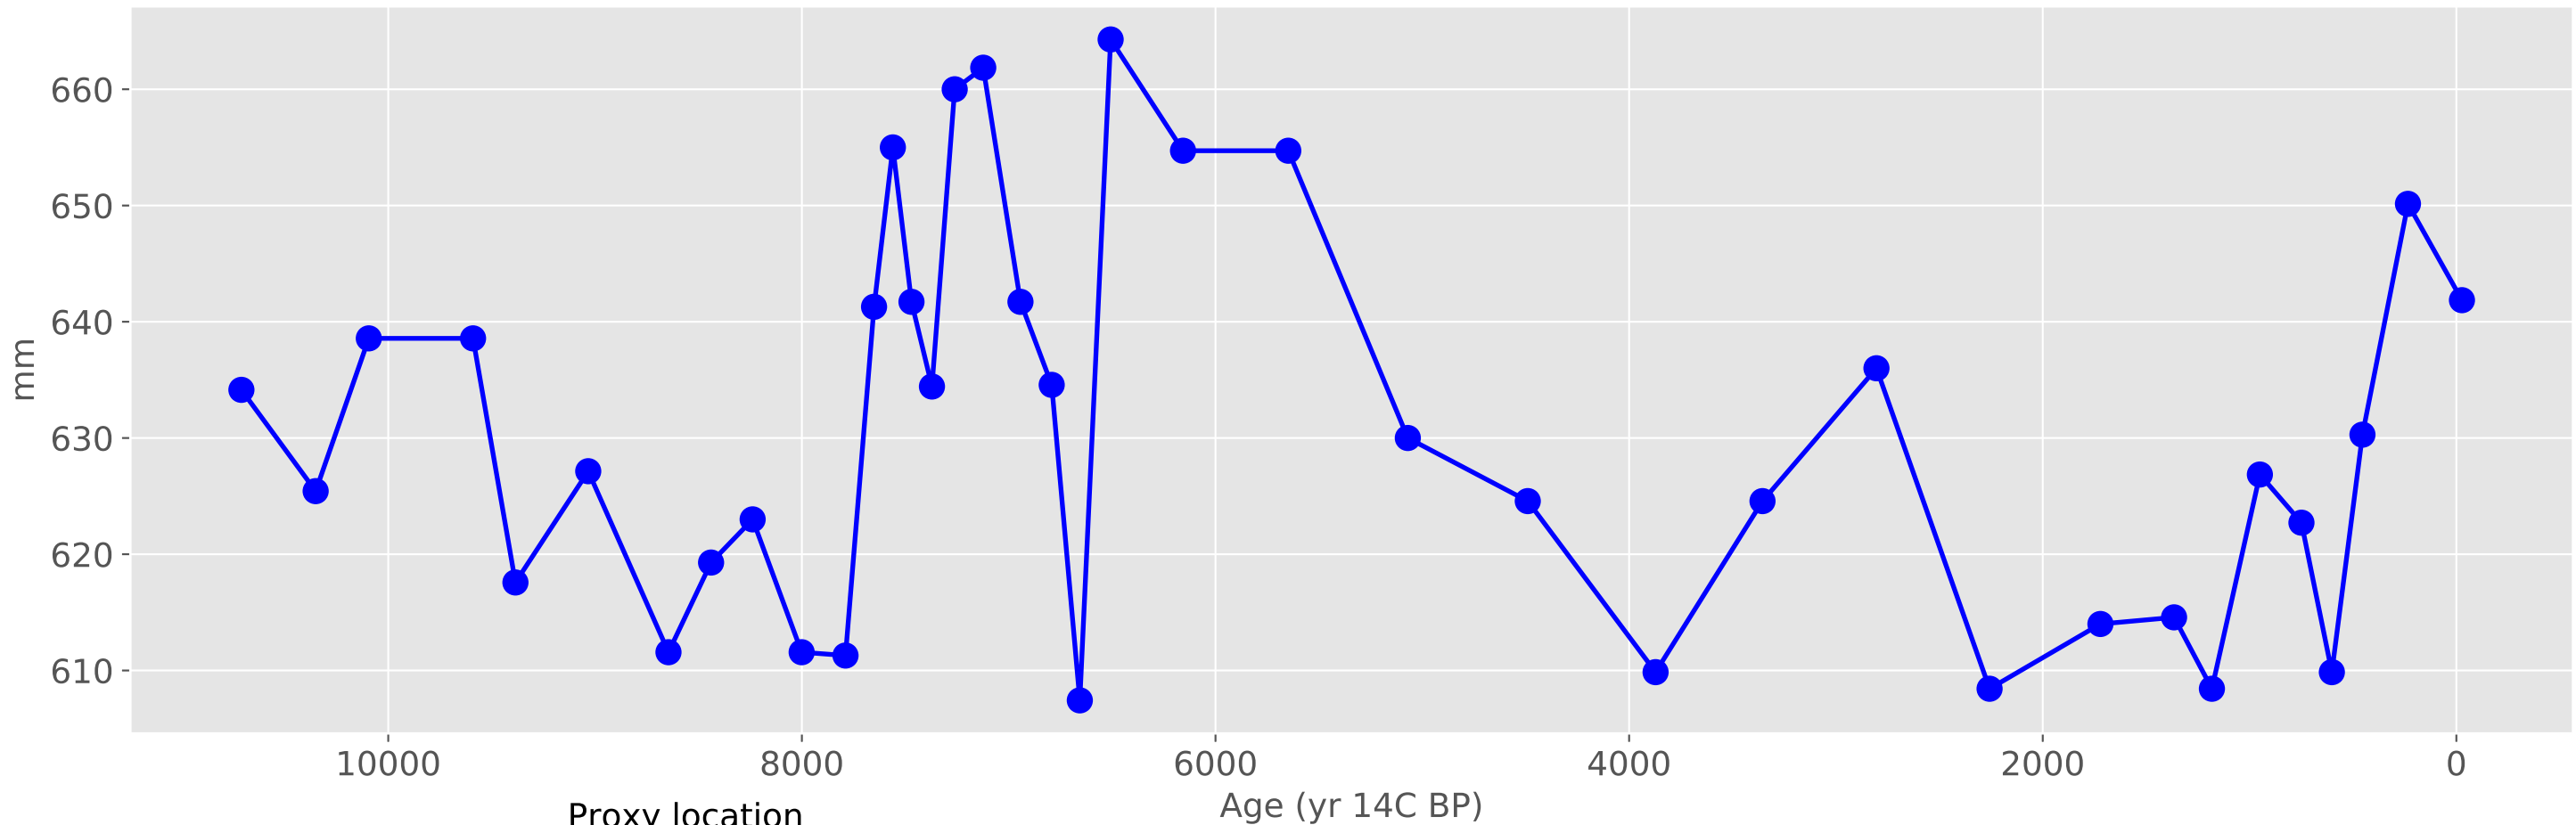

Proxy location  
(38.87 ° N, 107.08 ° W)

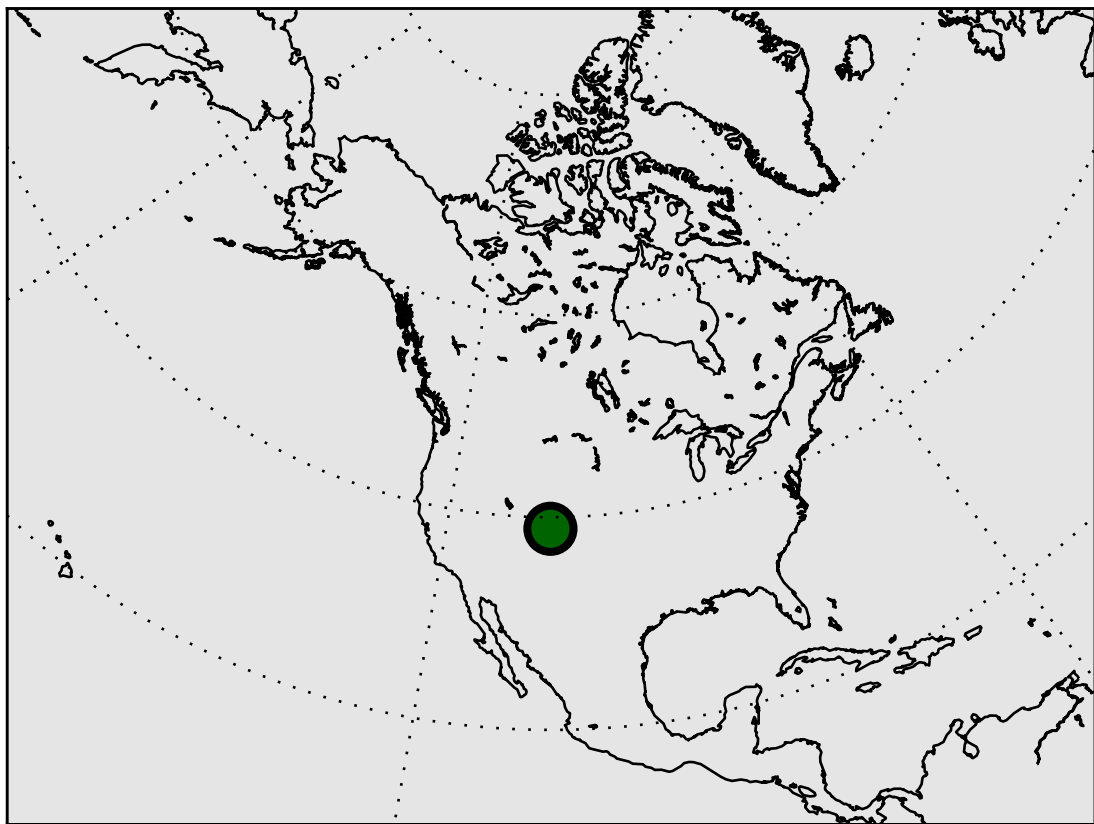

|                    |                                                       |
|--------------------|-------------------------------------------------------|
| Dataset name:      | Copley.Fall.1997                                      |
| Archive type:      | LakeSediment                                          |
| Proxy type:        | pollen                                                |
| Variable name:     | precipitation                                         |
| Latitude ( ° N):   | 38.87                                                 |
| Longitude ( ° E):  | -107.08                                               |
| Elevation (m):     | 3250.0                                                |
| Interp. variable:  | P                                                     |
| Interp. detail:    | amount@surface                                        |
| Interp. season:    | annual                                                |
| Interp. direction: | positive                                              |
| Pub. 1 title:      | Timberline fluctuations and late Quaternary paleoc... |
| Pub. 1 authors:    | Fall, Patricia L.                                     |
| Pub. 1 year:       | 1997                                                  |
| Pub. 1 DOI:        | 10.1130/0016-7606(1997)109<1306:TFALQP>2.3.CO;2       |
| Original data URL: | www.ncdc.noaa.gov/paleo/study/27330                   |

Proxy data and metadata  
LakeSediment | pollen | Copley.Fall.1997 | M2Lv02p3n8eP

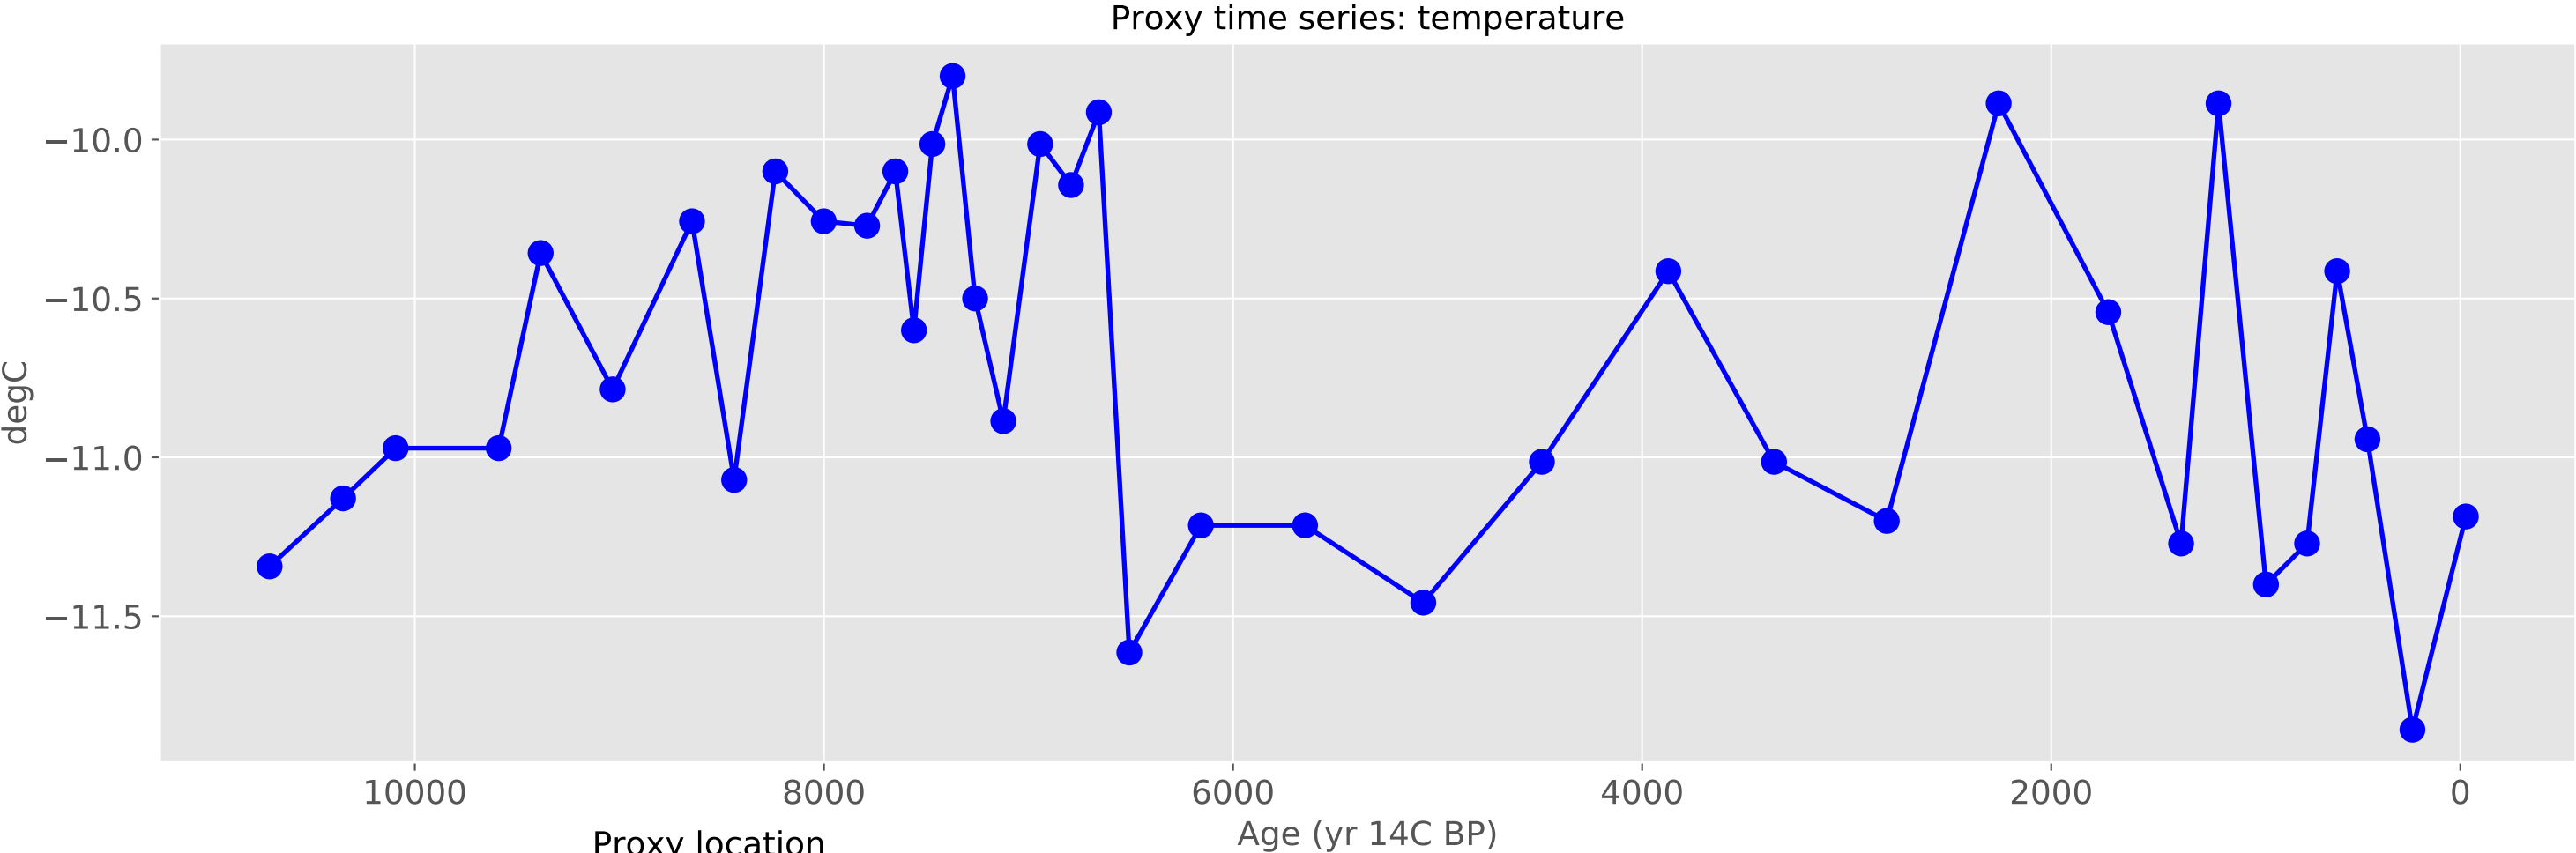

|                    |                                                       |
|--------------------|-------------------------------------------------------|
| Dataset name:      | Copley.Fall.1997                                      |
| Archive type:      | LakeSediment                                          |
| Proxy type:        | pollen                                                |
| Variable name:     | temperature                                           |
| Latitude ( ° N):   | 38.87                                                 |
| Longitude ( ° E):  | -107.08                                               |
| Elevation (m):     | 3250.0                                                |
| Interp. variable:  | T                                                     |
| Interp. detail:    | air@surface                                           |
| Interp. season:    | winter+                                               |
| Interp. direction: | positive                                              |
| Pub. 1 title:      | Timberline fluctuations and late Quaternary paleoc... |
| Pub. 1 authors:    | Fall, Patricia L.                                     |
| Pub. 1 year:       | 1997                                                  |
| Pub. 1 DOI:        | 10.1130/0016-7606(1997)109<1306:TFALQP>2.3.CO;2       |
| Original data URL: | www.ncdc.noaa.gov/paleo/study/27330                   |

Proxy data and metadata

LakeSediment | pollen | KeystoneIronbog.Fall.1985 | M2Lynyi720vP

Proxy time series: temperature

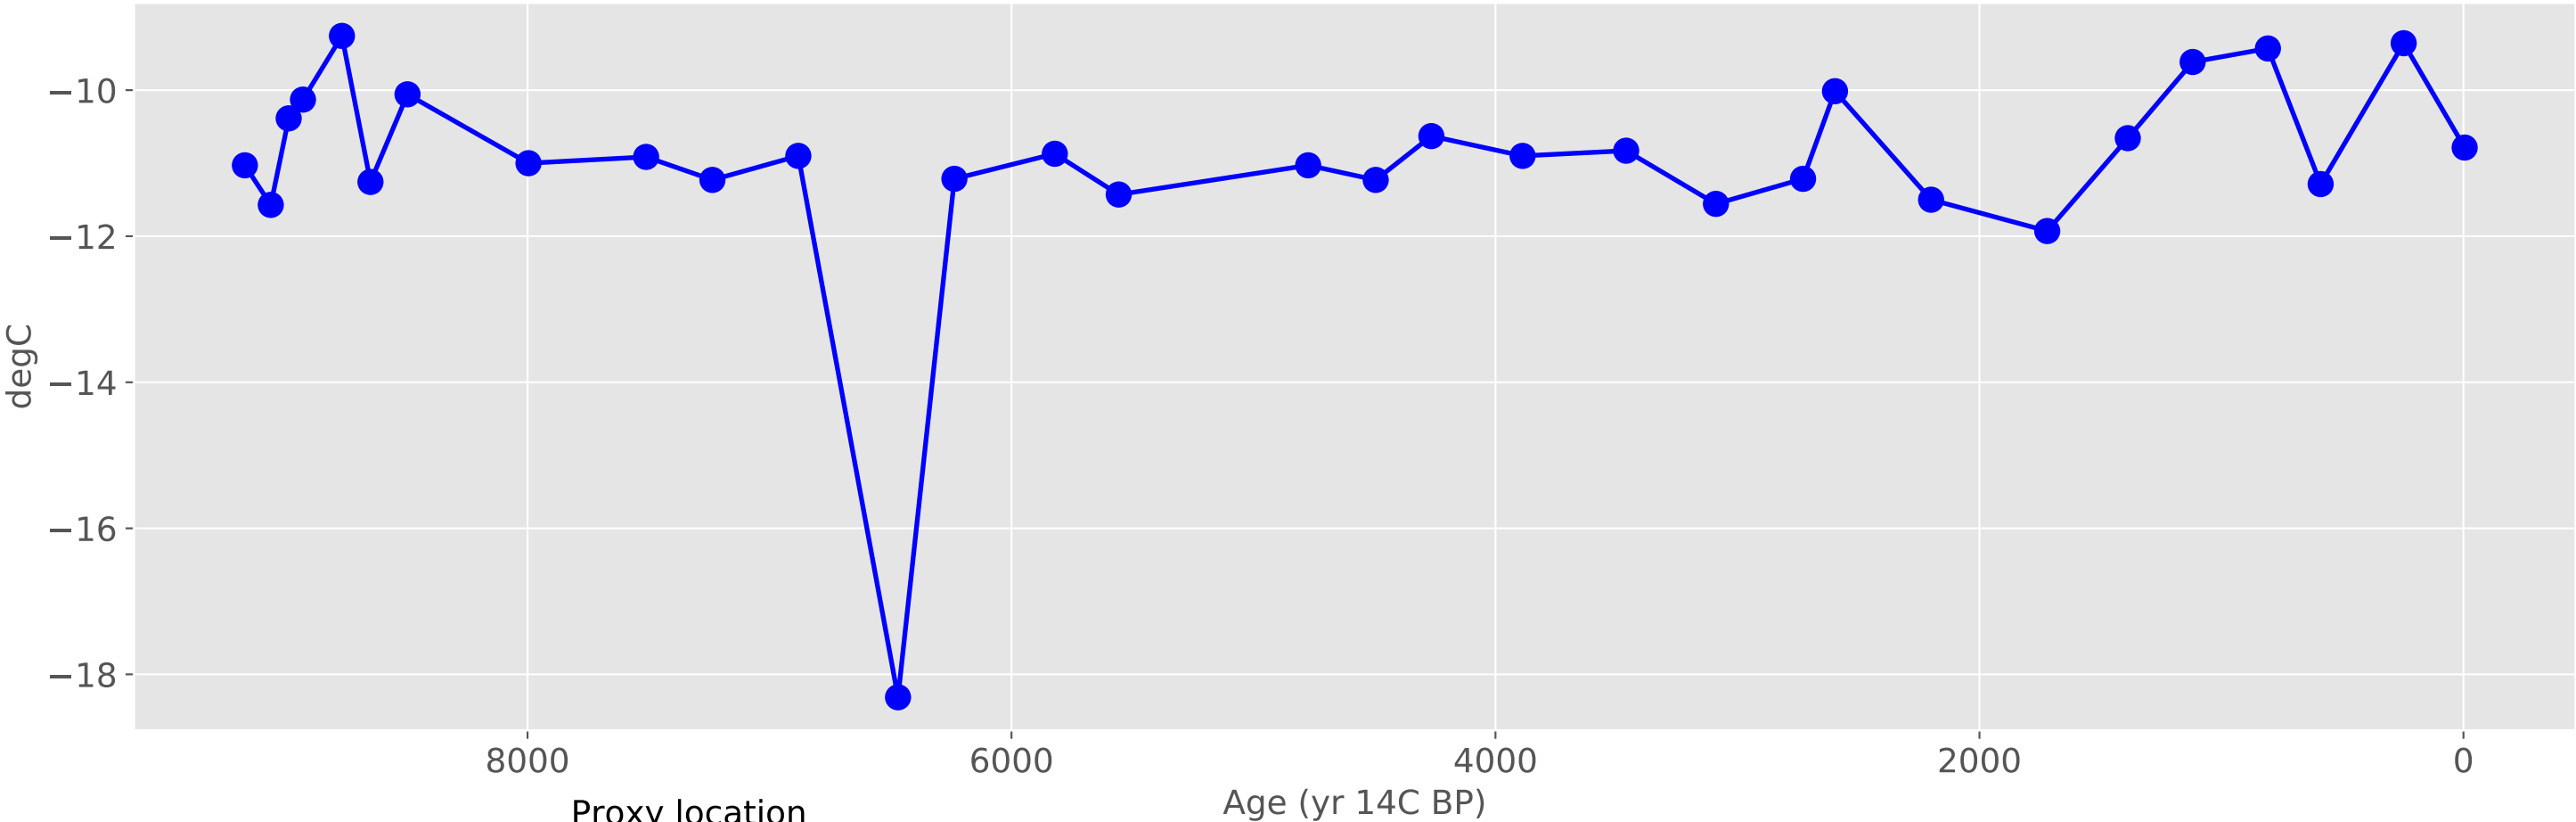

Proxy location  
(38.87 ° N, 107.03 ° W)



|                    |                                                                                              |
|--------------------|----------------------------------------------------------------------------------------------|
| Dataset name:      | KeystoneIronbog.Fall.1985                                                                    |
| Archive type:      | LakeSediment                                                                                 |
| Proxy type:        | pollen                                                                                       |
| Variable name:     | temperature                                                                                  |
| Latitude ( ° N):   | 38.87                                                                                        |
| Longitude ( ° E):  | -107.03                                                                                      |
| Elevation (m):     | 2920.0                                                                                       |
| Interp. variable:  | T                                                                                            |
| Interp. detail:    | air@surface                                                                                  |
| Interp. season:    | winter+                                                                                      |
| Interp. direction: | positive                                                                                     |
| Pub. 1 title:      | Vegetation dynamics in the southern Rocky Mountain...                                        |
| Pub. 1 authors:    | Fall, P.L.                                                                                   |
| Pub. 1 year:       | 1988                                                                                         |
| Pub. 1 DOI:        | Fall, P.L. 1985. Holocene dynamics of the subalpin...                                        |
| Original data URL: | <a href="http://www.ncdc.noaa.gov/paleo/study/27330">www.ncdc.noaa.gov/paleo/study/27330</a> |

Proxy data and metadata  
LakeSediment | pollen | Copley.Fall.1997 | M2Lz7ewxd8jP

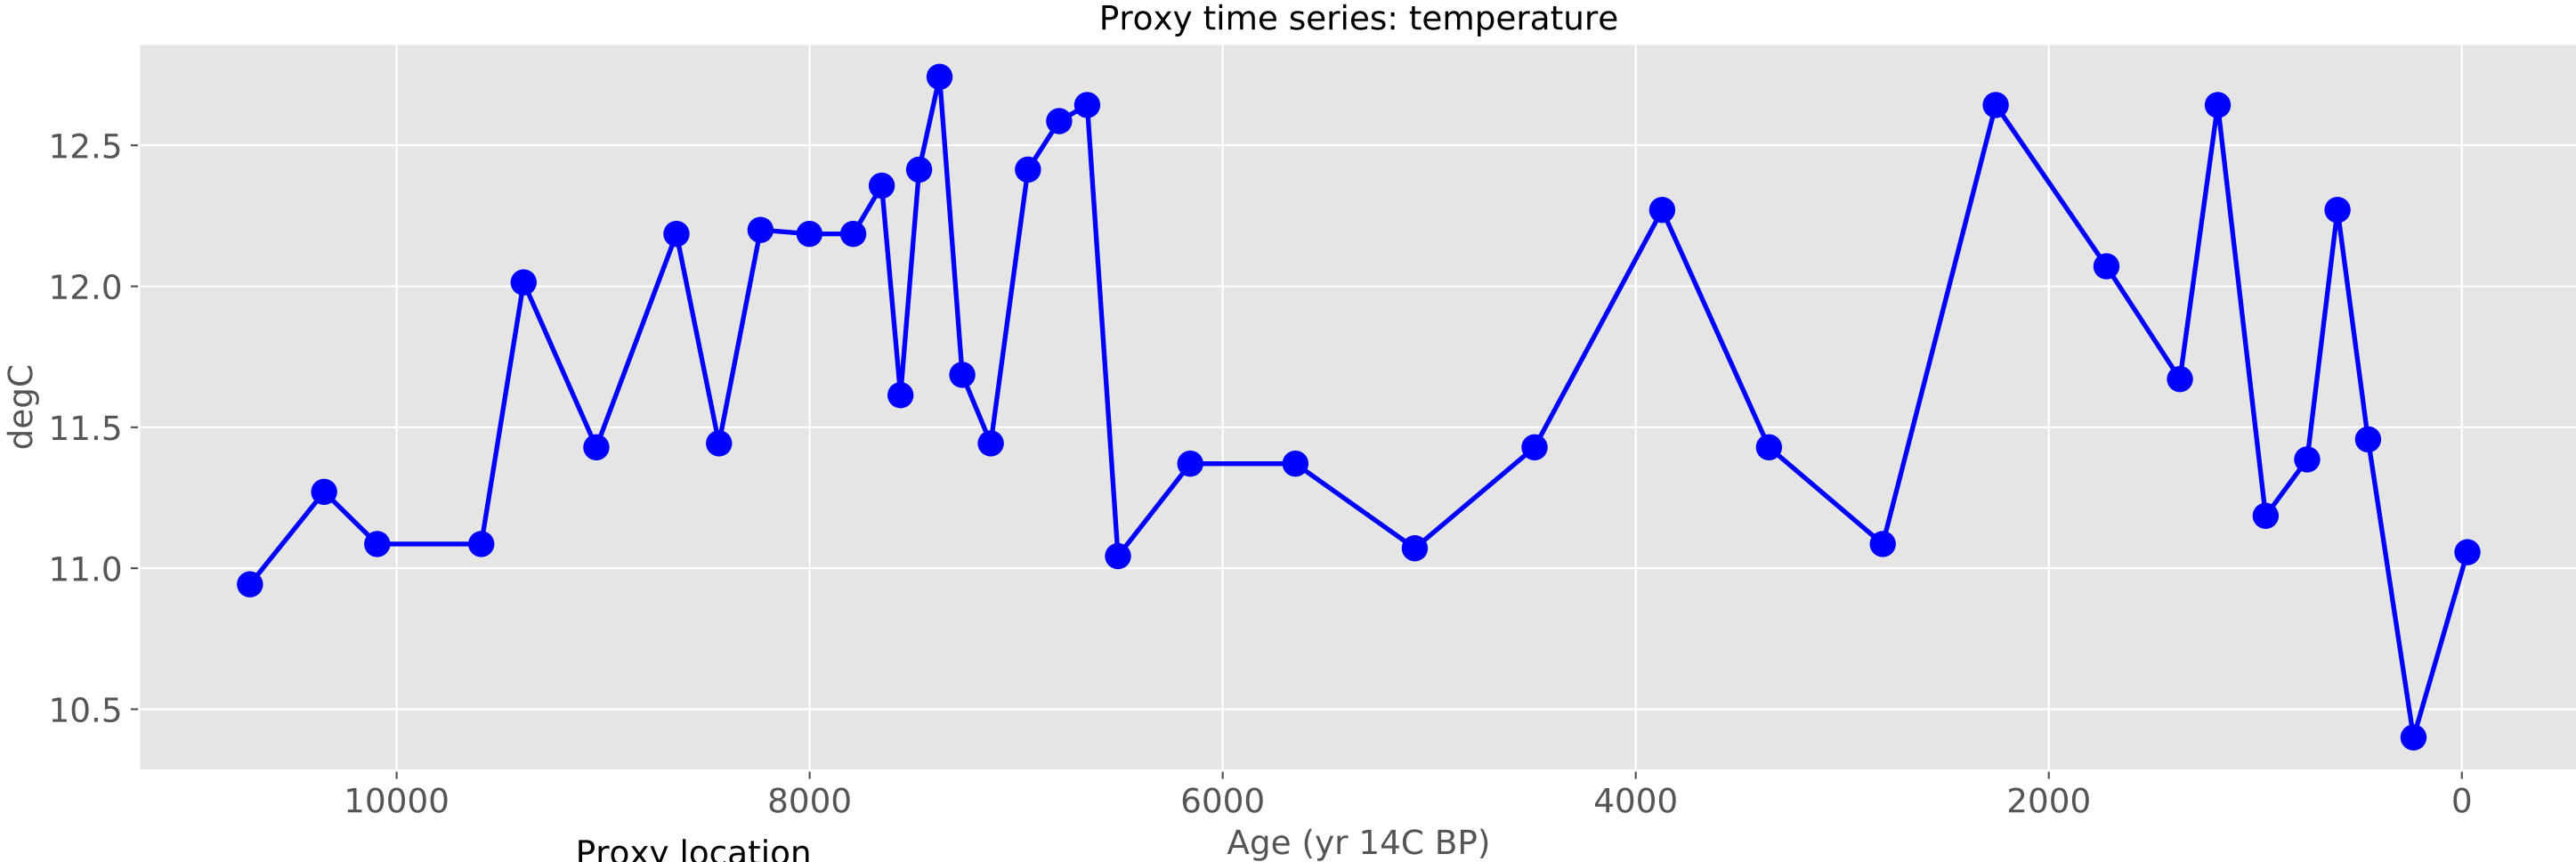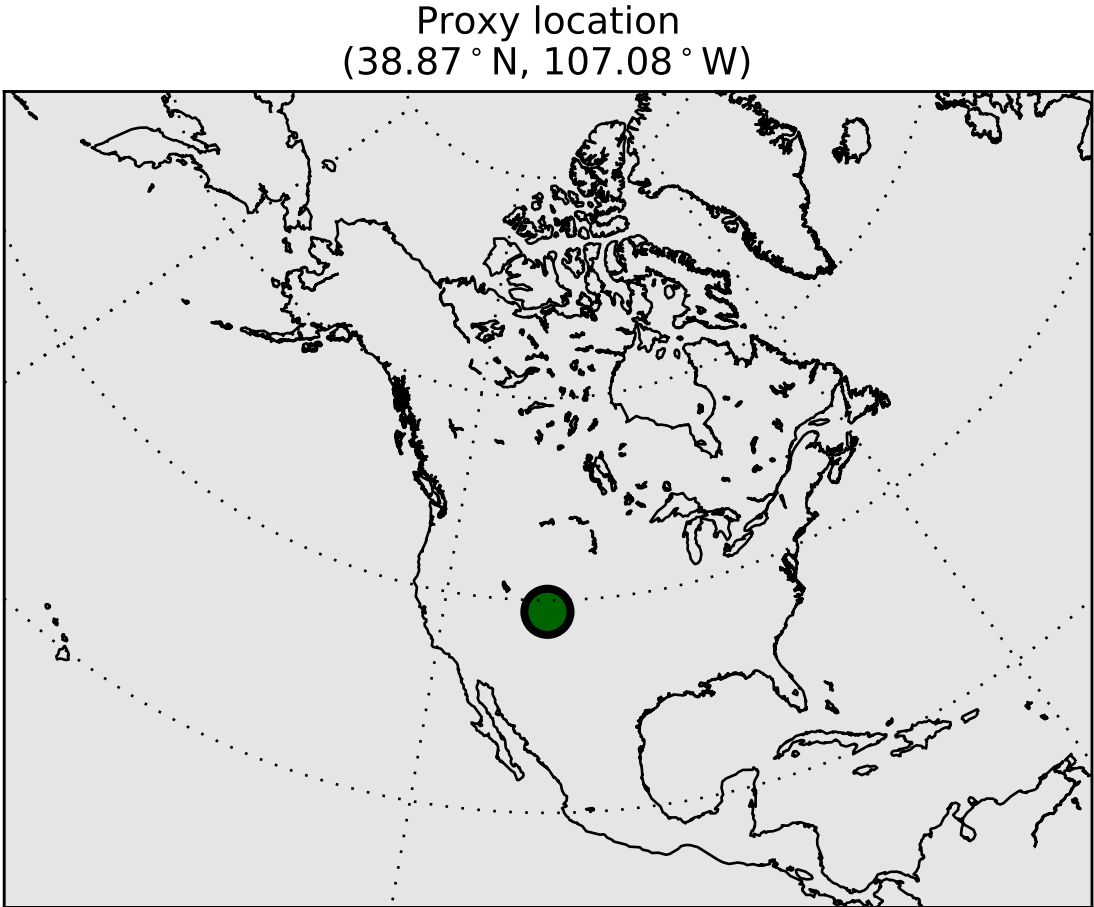

|                    |                                                       |
|--------------------|-------------------------------------------------------|
| Dataset name:      | Copley.Fall.1997                                      |
| Archive type:      | LakeSediment                                          |
| Proxy type:        | pollen                                                |
| Variable name:     | temperature                                           |
| Latitude ( ° N):   | 38.87                                                 |
| Longitude ( ° E):  | -107.08                                               |
| Elevation (m):     | 3250.0                                                |
| Interp. variable:  | T                                                     |
| Interp. detail:    | air@surface                                           |
| Interp. season:    | summer+                                               |
| Interp. direction: | positive                                              |
| Pub. 1 title:      | Timberline fluctuations and late Quaternary paleoc... |
| Pub. 1 authors:    | Fall, Patricia L.                                     |
| Pub. 1 year:       | 1997                                                  |
| Pub. 1 DOI:        | 10.1130/0016-7606(1997)109<1306:TFALQP>2.3.CO;2       |
| Original data URL: | www.ncdc.noaa.gov/paleo/study/27330                   |

Proxy data and metadata

LakeSediment | pollen | CottonwoodPassPond.Fall.1997 | M2L41n12cadP

Proxy time series: precipitation

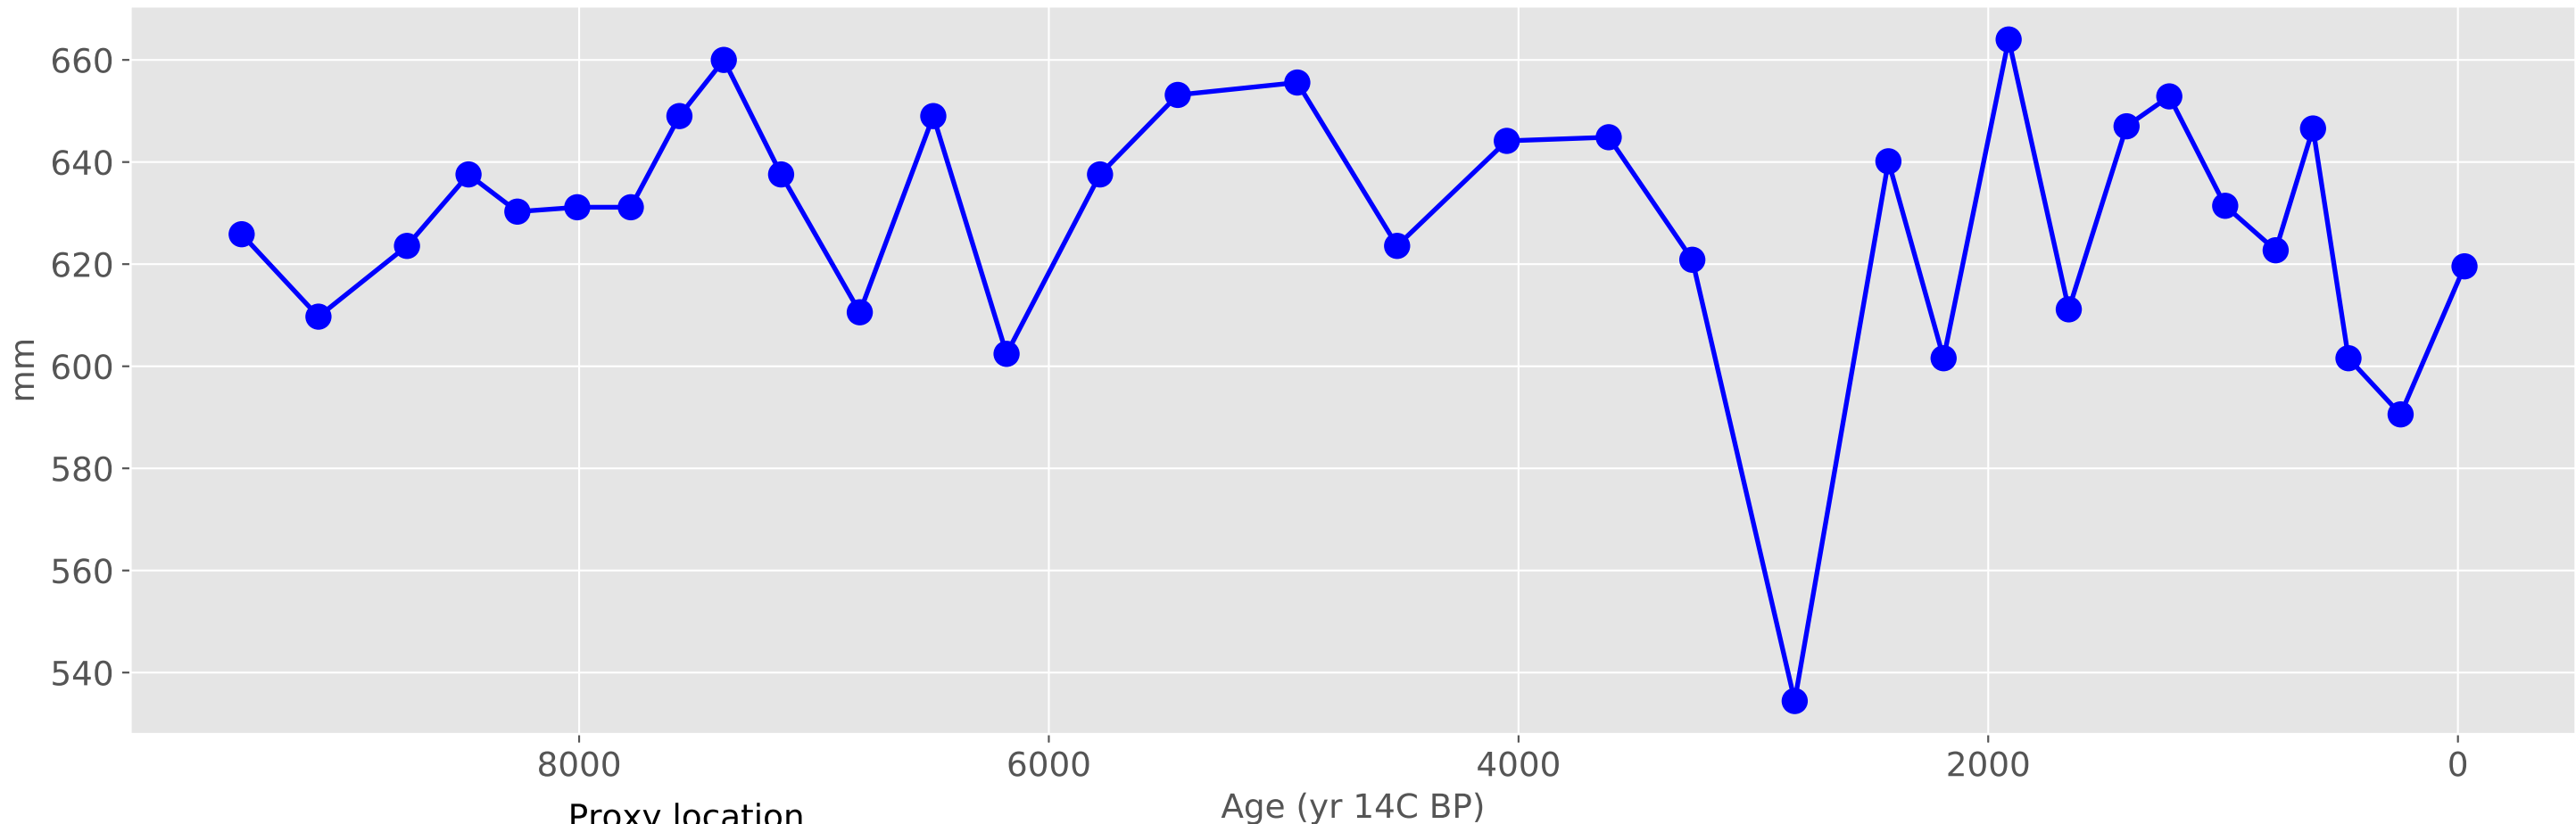

Proxy location  
(38.83 ° N, 106.41 ° W)

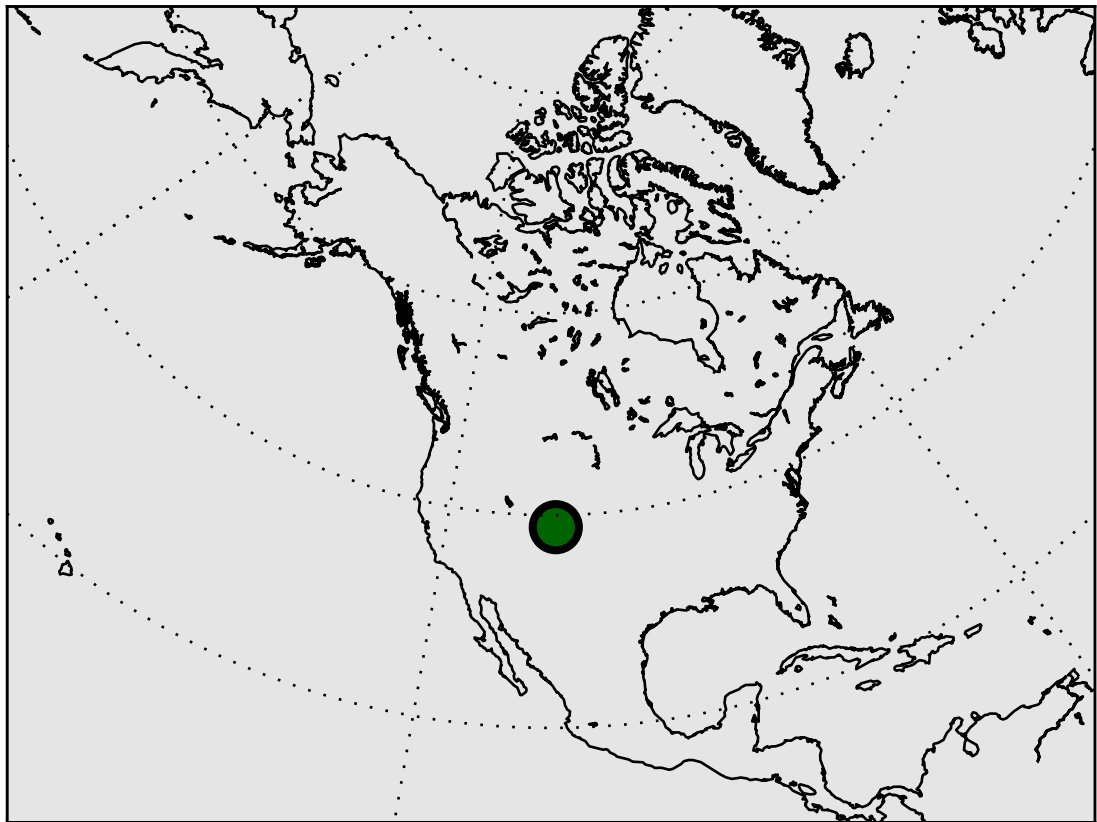

|                    |                                                       |
|--------------------|-------------------------------------------------------|
| Dataset name:      | CottonwoodPassPond.Fall.1997                          |
| Archive type:      | LakeSediment                                          |
| Proxy type:        | pollen                                                |
| Variable name:     | precipitation                                         |
| Latitude ( ° N):   | 38.83                                                 |
| Longitude ( ° E):  | -106.41                                               |
| Elevation (m):     | 3670.0                                                |
| Interp. variable:  | P                                                     |
| Interp. detail:    | amount@surface                                        |
| Interp. season:    | annual                                                |
| Interp. direction: | positive                                              |
| Pub. 1 title:      | Timberline fluctuations and late Quaternary paleoc... |
| Pub. 1 authors:    | Fall, Patricia L.                                     |
| Pub. 1 year:       | 1997                                                  |
| Pub. 1 DOI:        | 10.1130/0016-7606(1997)109<1306:TFALQP>2.3.CO;2       |
| Original data URL: | www.ncdc.noaa.gov/paleo/study/27330                   |



Proxy data and metadata

LakeSediment | pollen | CottonwoodPassPond.Fall.1997 | M2L8nwh67cmP

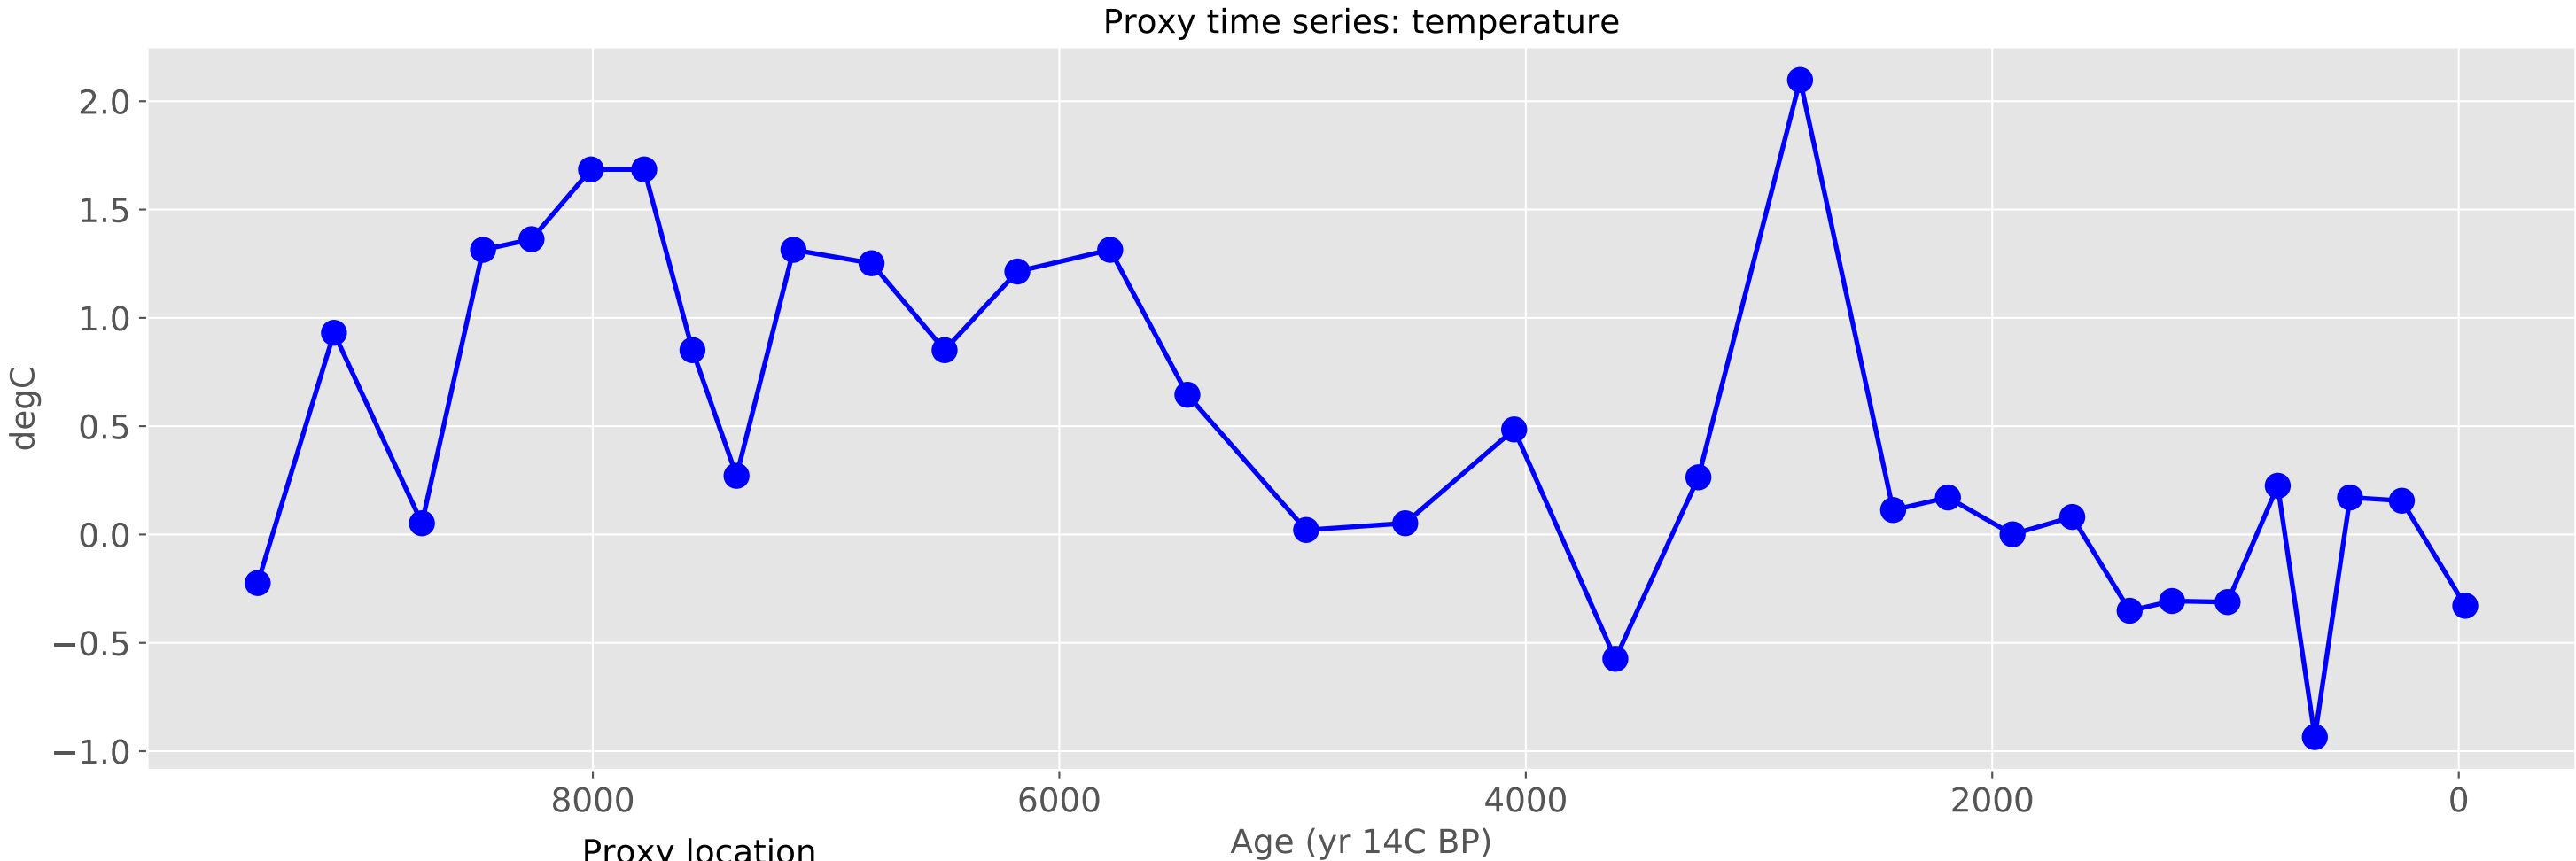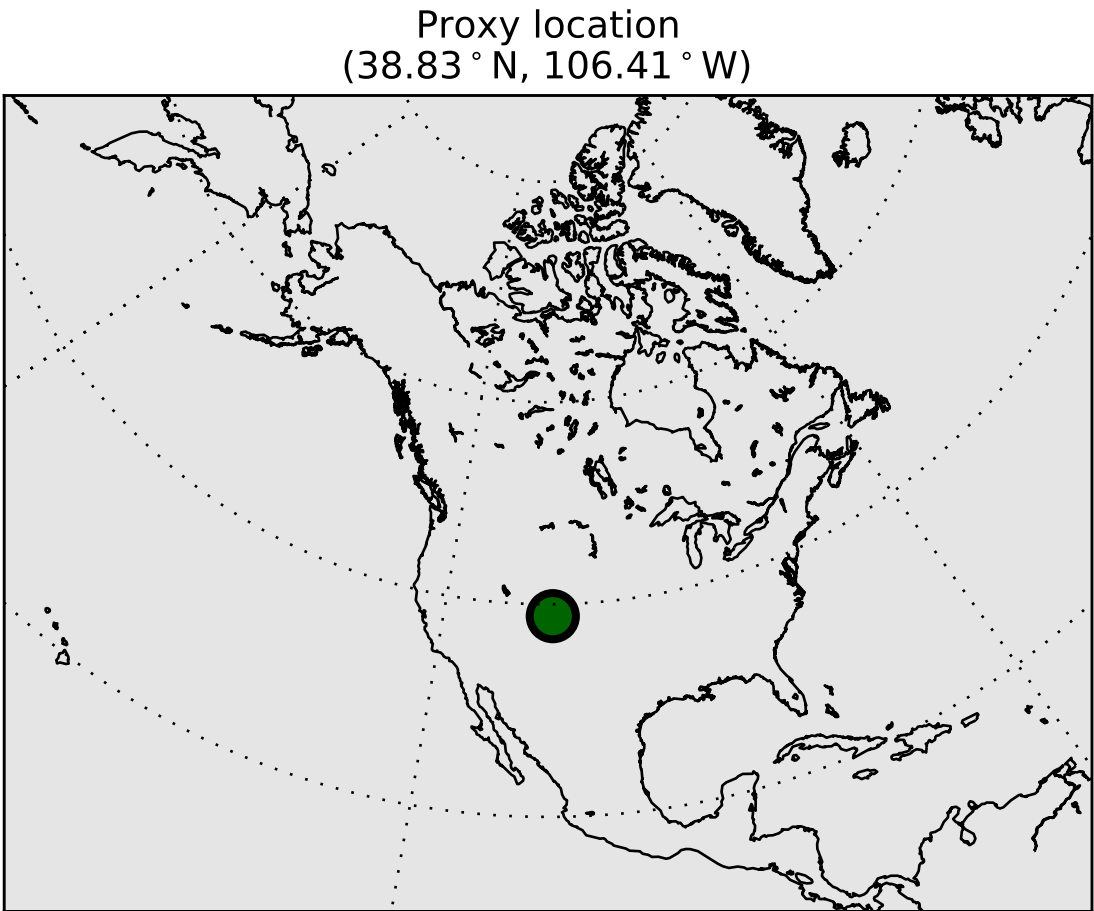

|                    |                                                       |
|--------------------|-------------------------------------------------------|
| Dataset name:      | CottonwoodPassPond.Fall.1997                          |
| Archive type:      | LakeSediment                                          |
| Proxy type:        | pollen                                                |
| Variable name:     | temperature                                           |
| Latitude ( ° N):   | 38.83                                                 |
| Longitude ( ° E):  | -106.41                                               |
| Elevation (m):     | 3670.0                                                |
| Interp. variable:  | T                                                     |
| Interp. detail:    | air@surface                                           |
| Interp. season:    | annual                                                |
| Interp. direction: | positive                                              |
| Pub. 1 title:      | Timberline fluctuations and late Quaternary paleoc... |
| Pub. 1 authors:    | Fall, Patricia L.                                     |
| Pub. 1 year:       | 1997                                                  |
| Pub. 1 DOI:        | 10.1130/0016-7606(1997)109<1306:TFALQP>2.3.CO;2       |
| Original data URL: | www.ncdc.noaa.gov/paleo/study/27330                   |

Proxy data and metadata

LakeSediment | pollen | CottonwoodPassPond.Fall.1997 | M2Lse70i8puP

Proxy time series: temperature

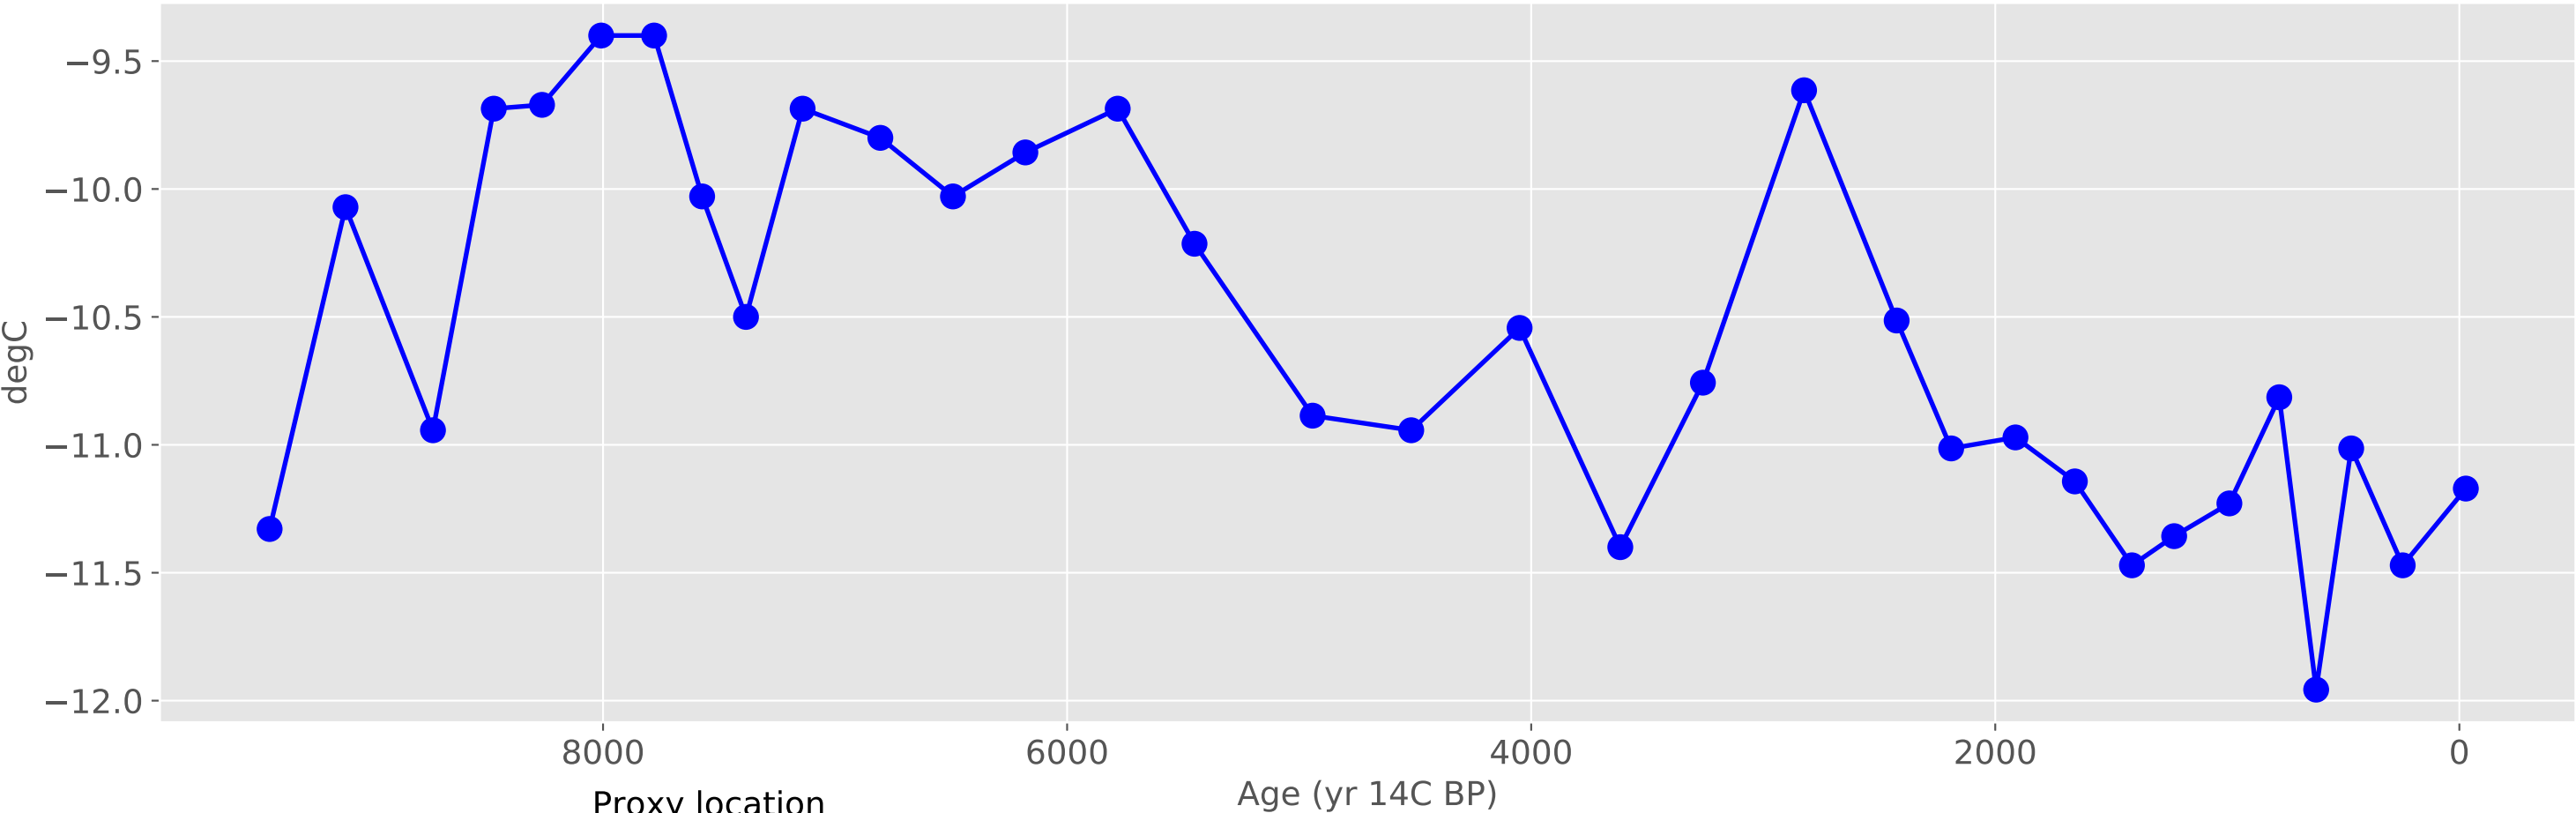

Proxy location  
(38.83 ° N, 106.41 ° W)



|                    |                                                       |
|--------------------|-------------------------------------------------------|
| Dataset name:      | CottonwoodPassPond.Fall.1997                          |
| Archive type:      | LakeSediment                                          |
| Proxy type:        | pollen                                                |
| Variable name:     | temperature                                           |
| Latitude ( ° N):   | 38.83                                                 |
| Longitude ( ° E):  | -106.41                                               |
| Elevation (m):     | 3670.0                                                |
| Interp. variable:  | T                                                     |
| Interp. detail:    | air@surface                                           |
| Interp. season:    | winter+                                               |
| Interp. direction: | positive                                              |
| Pub. 1 title:      | Timberline fluctuations and late Quaternary paleoc... |
| Pub. 1 authors:    | Fall, Patricia L.                                     |
| Pub. 1 year:       | 1997                                                  |
| Pub. 1 DOI:        | 10.1130/0016-7606(1997)109<1306:TFALQP>2.3.CO;2       |
| Original data URL: | www.ncdc.noaa.gov/paleo/study/27330                   |

Proxy data and metadata

LakeSediment | pollen | CottonwoodPassPond.Fall.1997 | M2Lyc9a2r23P

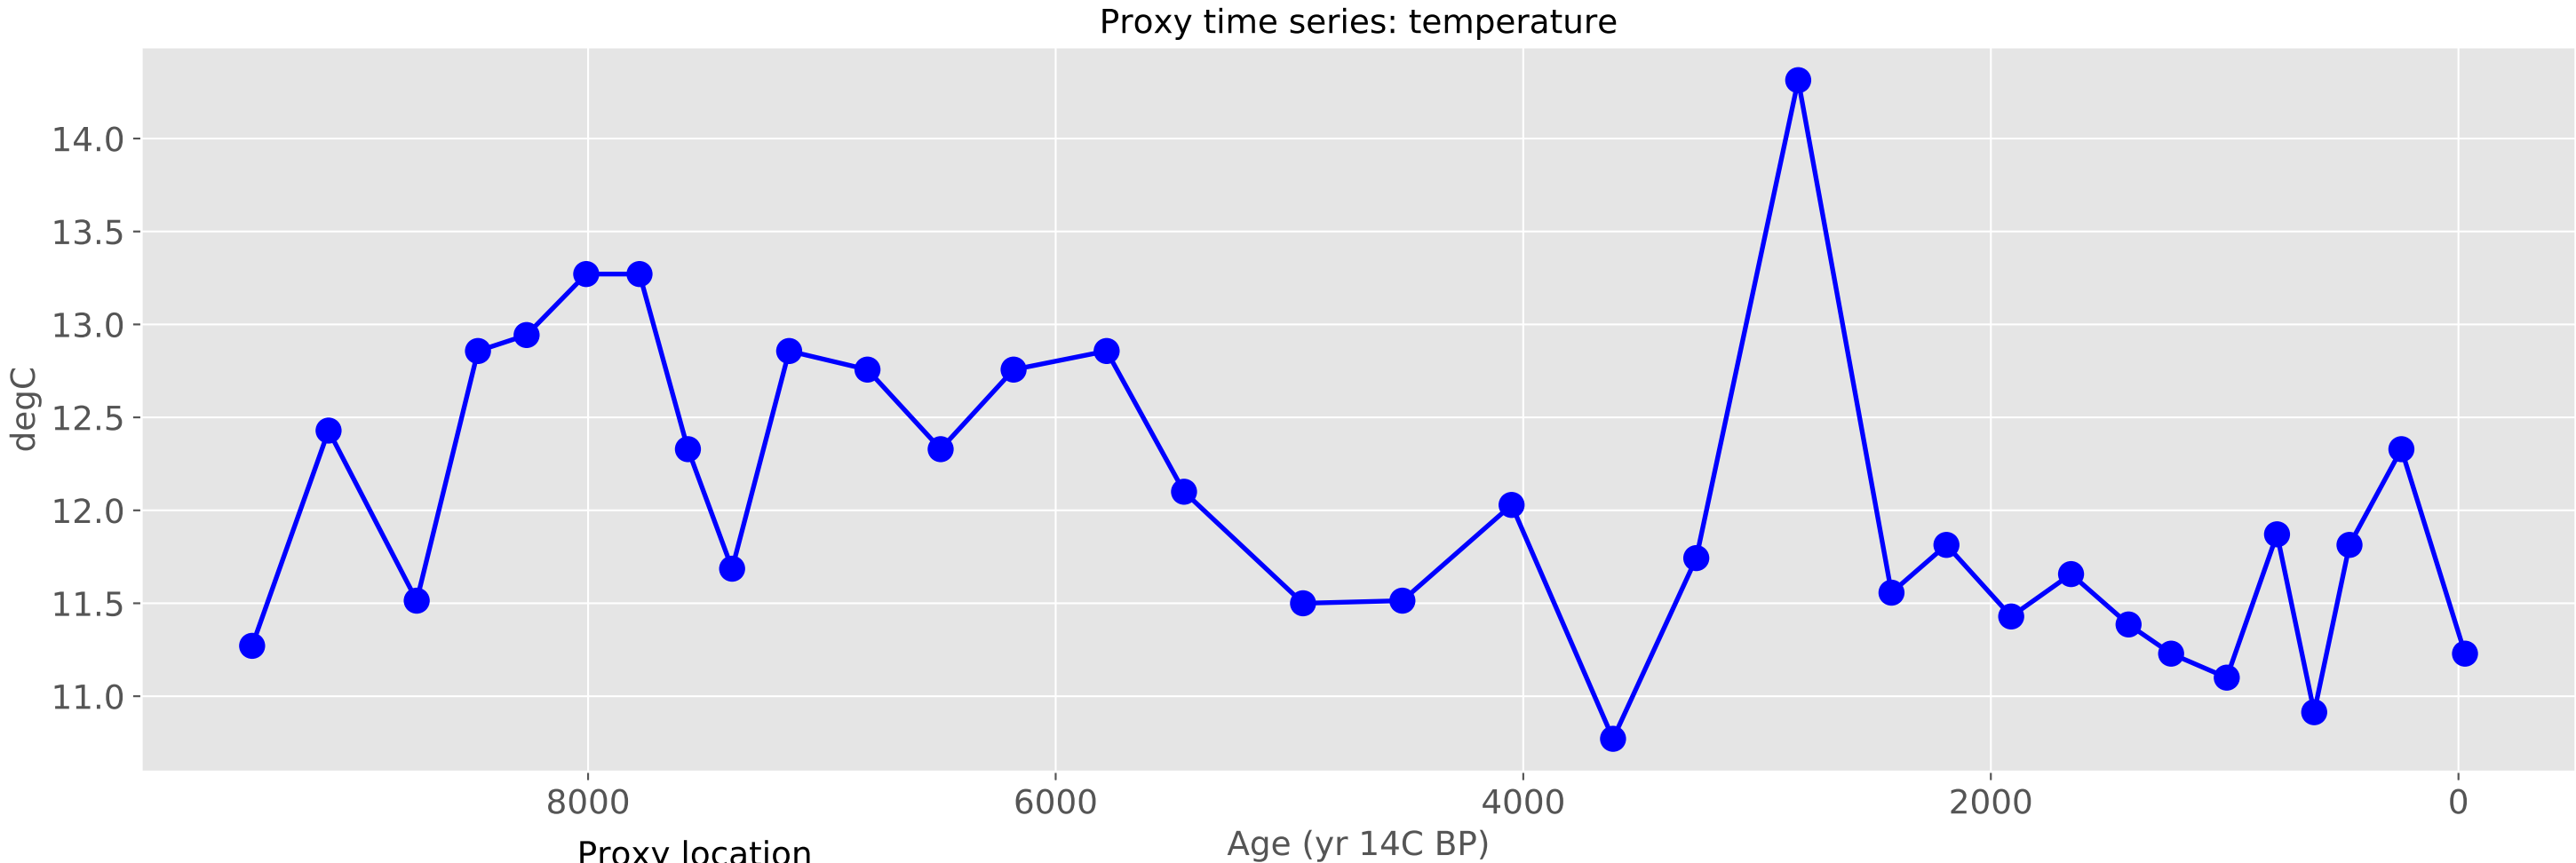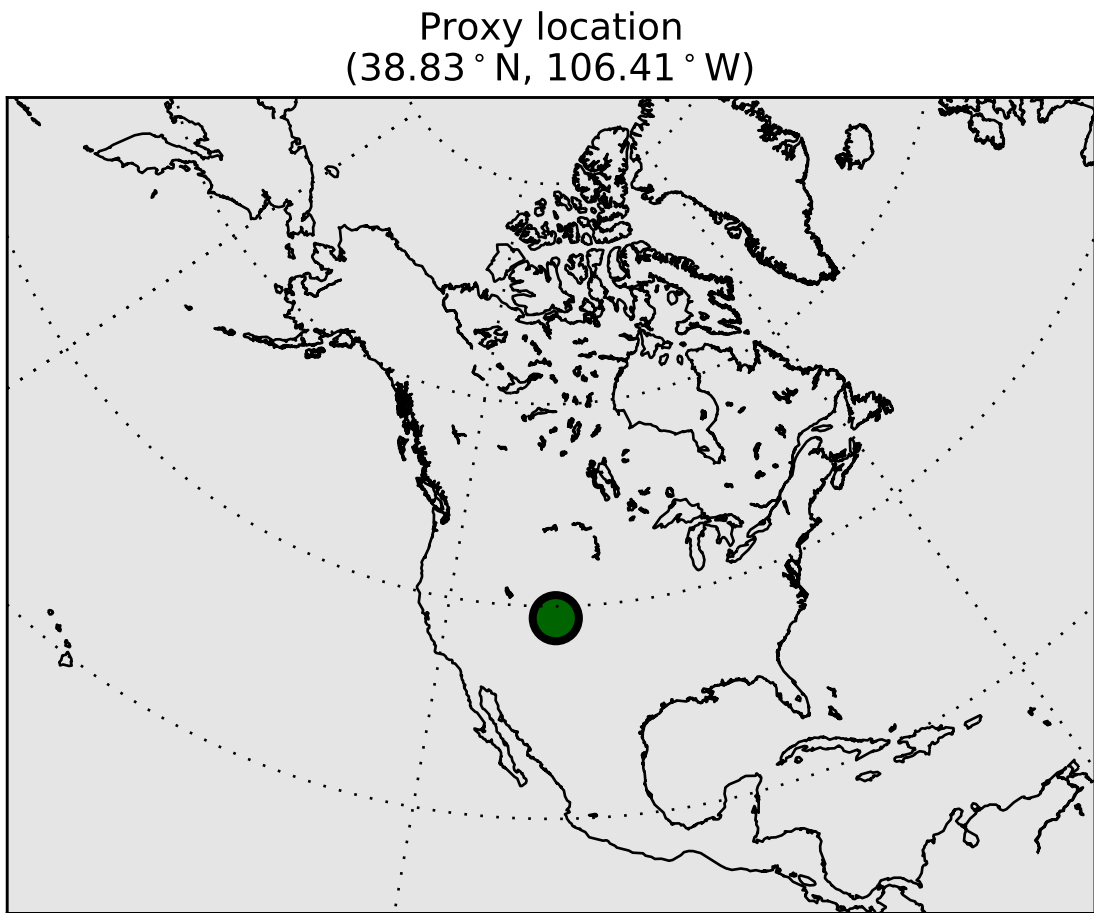

|                    |                                                       |
|--------------------|-------------------------------------------------------|
| Dataset name:      | CottonwoodPassPond.Fall.1997                          |
| Archive type:      | LakeSediment                                          |
| Proxy type:        | pollen                                                |
| Variable name:     | temperature                                           |
| Latitude ( ° N):   | 38.83                                                 |
| Longitude ( ° E):  | -106.41                                               |
| Elevation (m):     | 3670.0                                                |
| Interp. variable:  | T                                                     |
| Interp. detail:    | air@surface                                           |
| Interp. season:    | summer+                                               |
| Interp. direction: | positive                                              |
| Pub. 1 title:      | Timberline fluctuations and late Quaternary paleoc... |
| Pub. 1 authors:    | Fall, Patricia L.                                     |
| Pub. 1 year:       | 1997                                                  |
| Pub. 1 DOI:        | 10.1130/0016-7606(1997)109<1306:TFALQP>2.3.CO;2       |
| Original data URL: | www.ncdc.noaa.gov/paleo/study/27330                   |

Proxy data and metadata  
LakeSediment | pollen | HermitLake.Anderson.2018 | WEB7dda7318

Proxy time series: Pinus/Artemisia

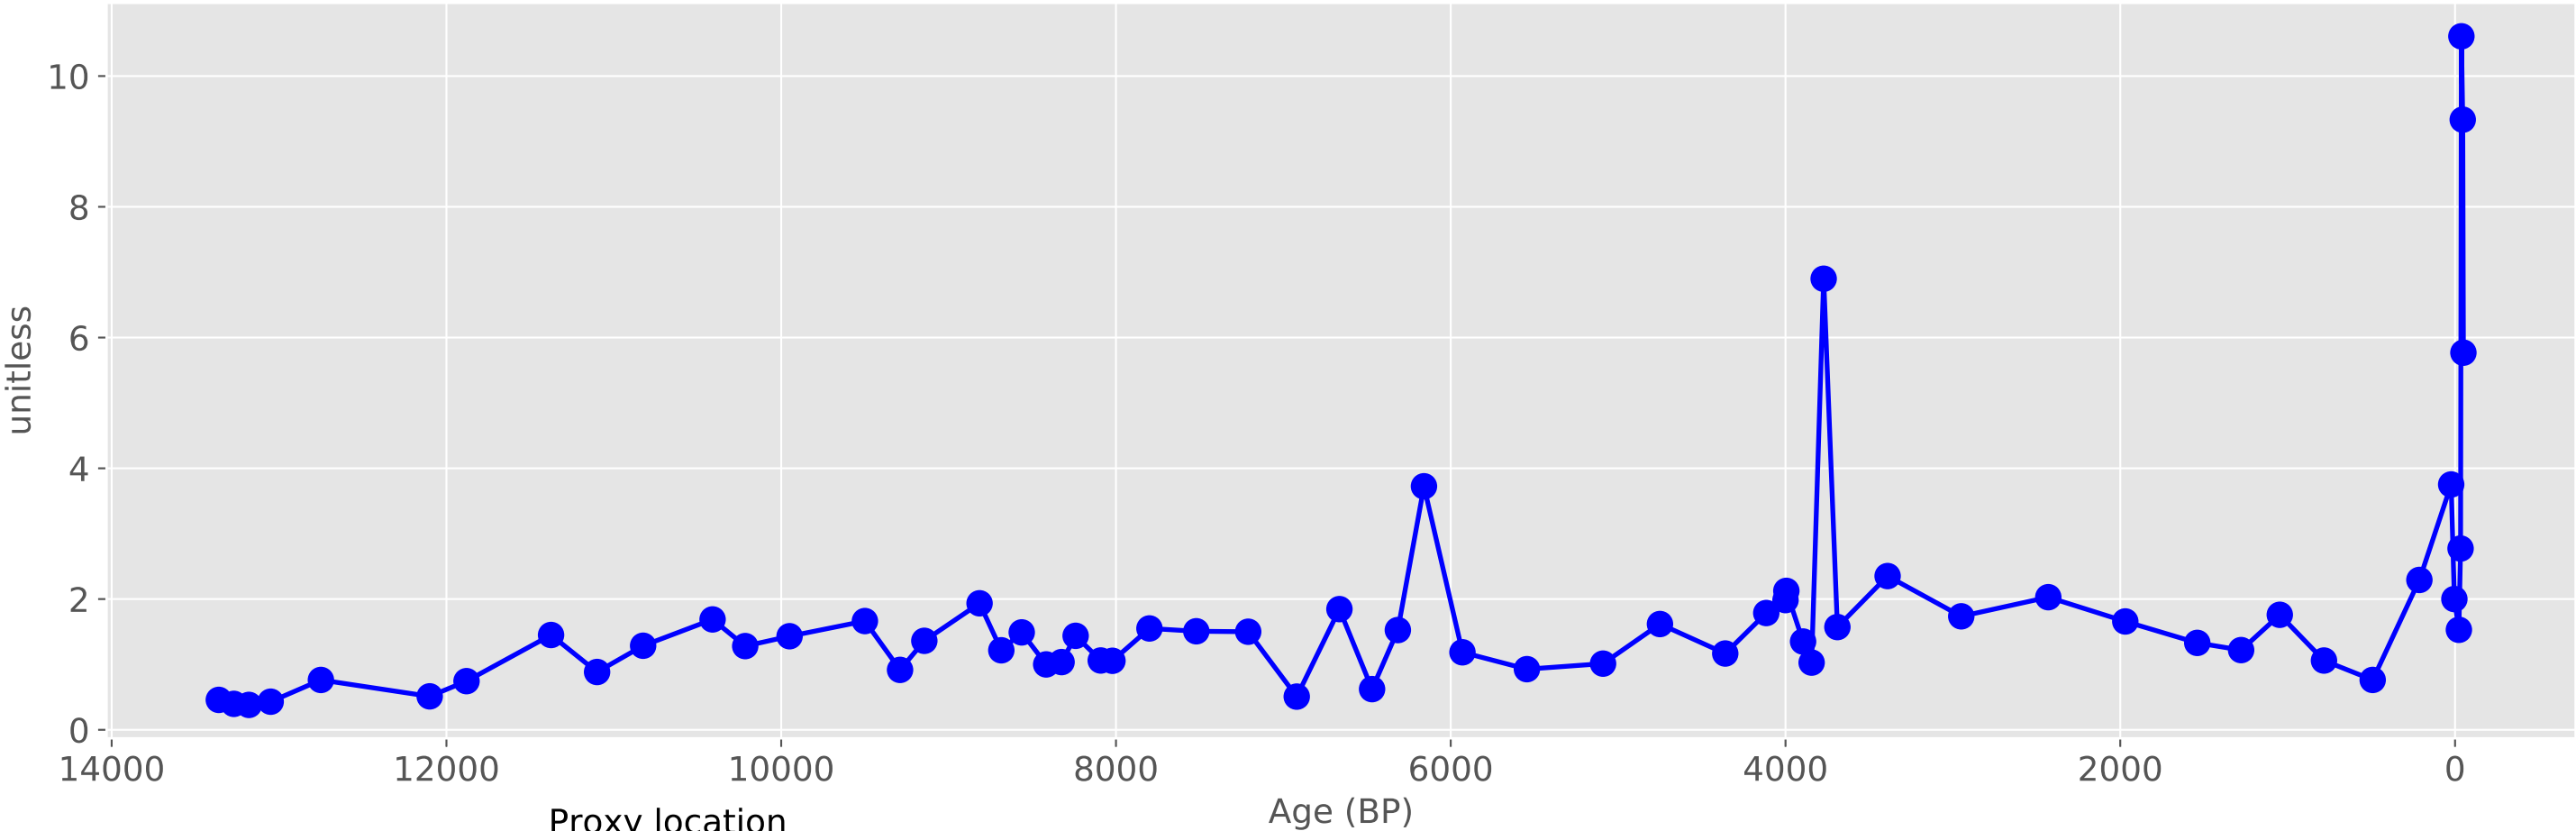

Proxy location  
(38.09 ° N, 105.63 ° W)

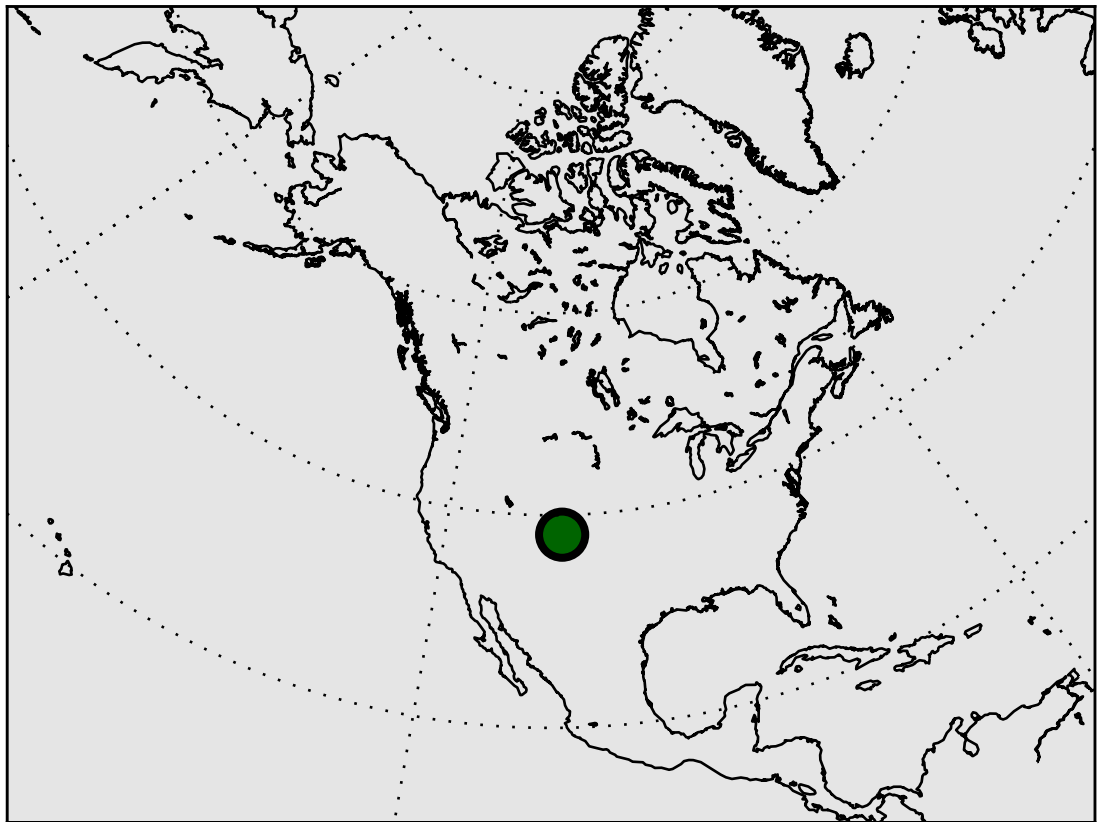

|                    |                                                       |
|--------------------|-------------------------------------------------------|
| Dataset name:      | HermitLake.Anderson.2018                              |
| Archive type:      | LakeSediment                                          |
| Proxy type:        | pollen                                                |
| Variable name:     | Pinus/Artemisia                                       |
| Latitude ( ° N):   | 38.0879                                               |
| Longitude ( ° E):  | -105.631                                              |
| Elevation (m):     | 3455.0                                                |
| Interp. variable:  | T                                                     |
| Interp. detail:    | air@surface                                           |
| Interp. season:    | annual                                                |
| Interp. direction: | positive                                              |
| Pub. 1 title:      | Postglacial environmental change of a high-elevati... |
| Pub. 1 authors:    | Anderson, R. Scott;Soltow, Hanna R.;Jimenez-Moreno... |
| Pub. 1 year:       | 2018                                                  |
| Pub. 1 DOI:        | 10.1130/2018.2536(13)                                 |
| Original data URL: | wNA                                                   |

Proxy data and metadata  
LakeSediment | pollen | HermitLake.Anderson.2018 | WEBa569a093

Proxy time series: Picea/Artemisia

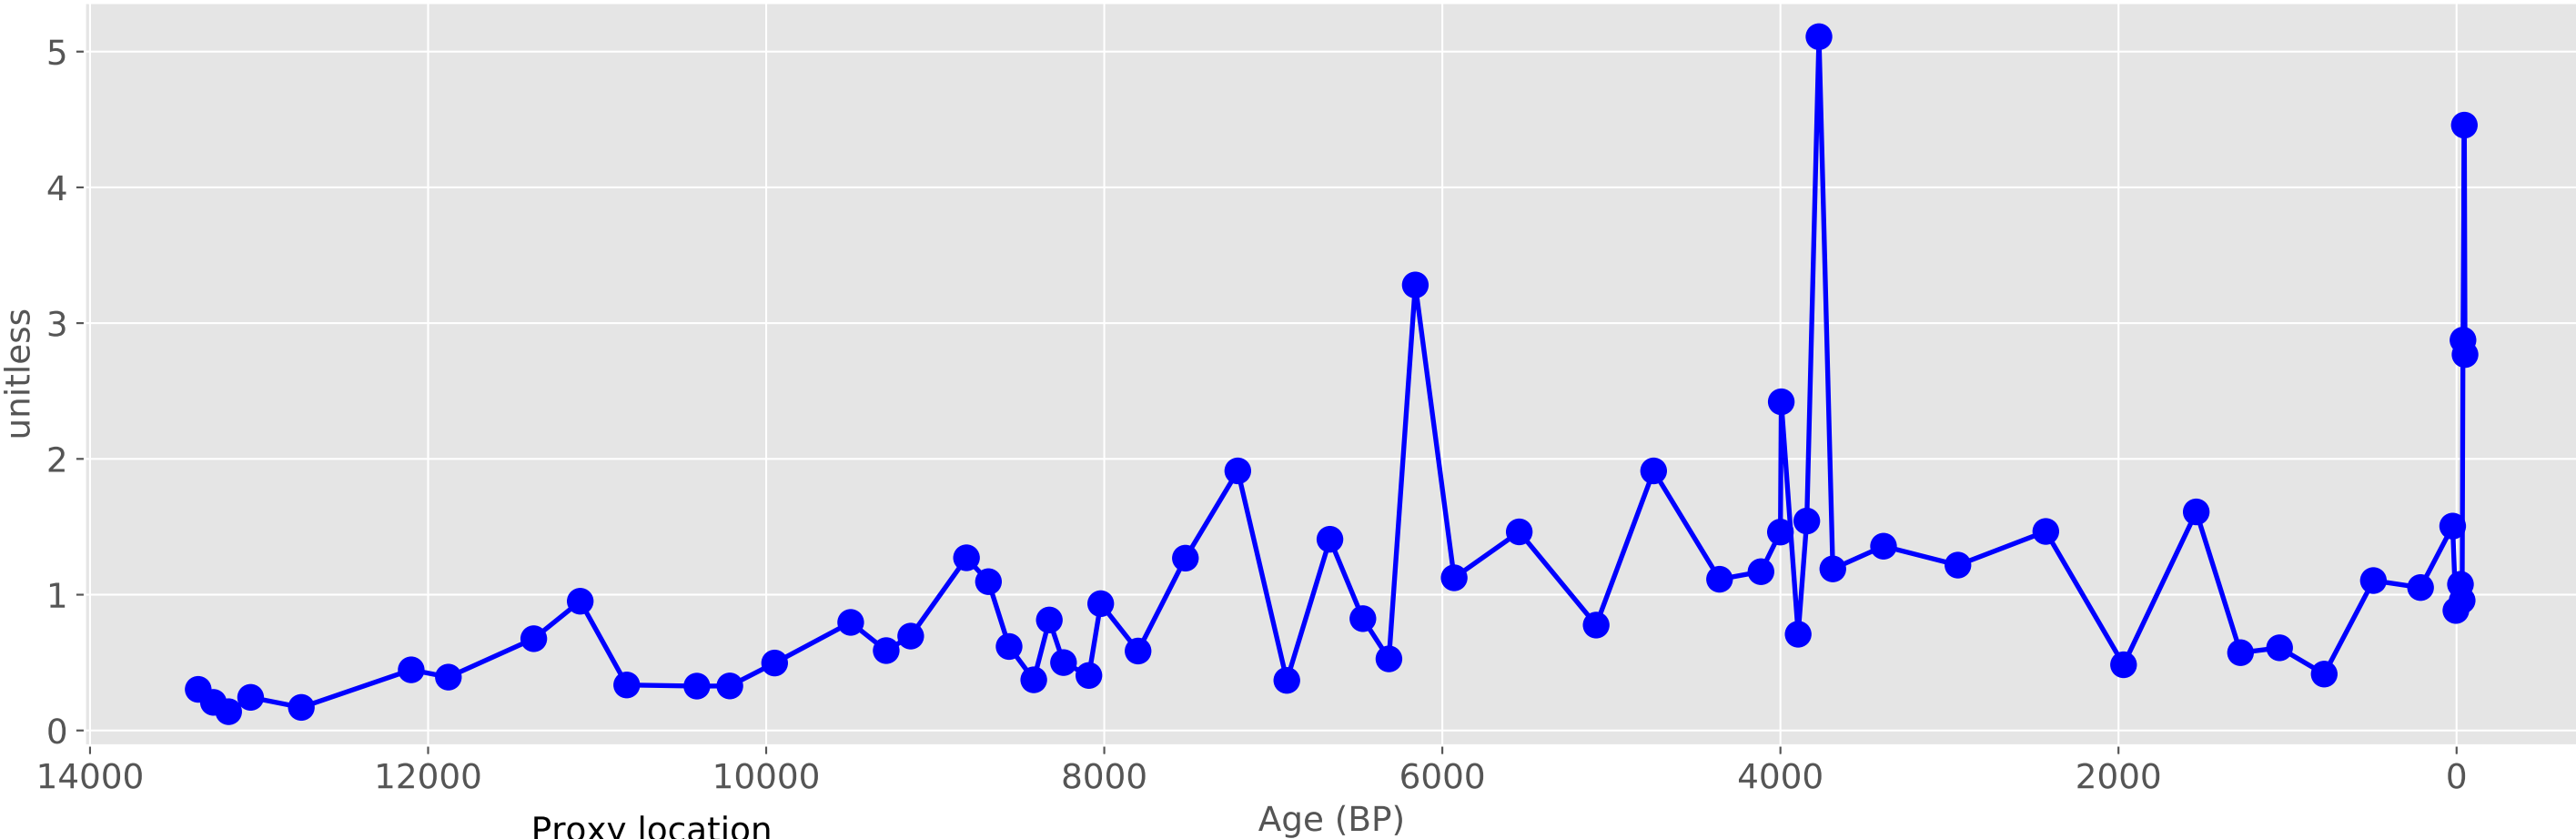

Proxy location  
(38.09 ° N, 105.63 ° W)

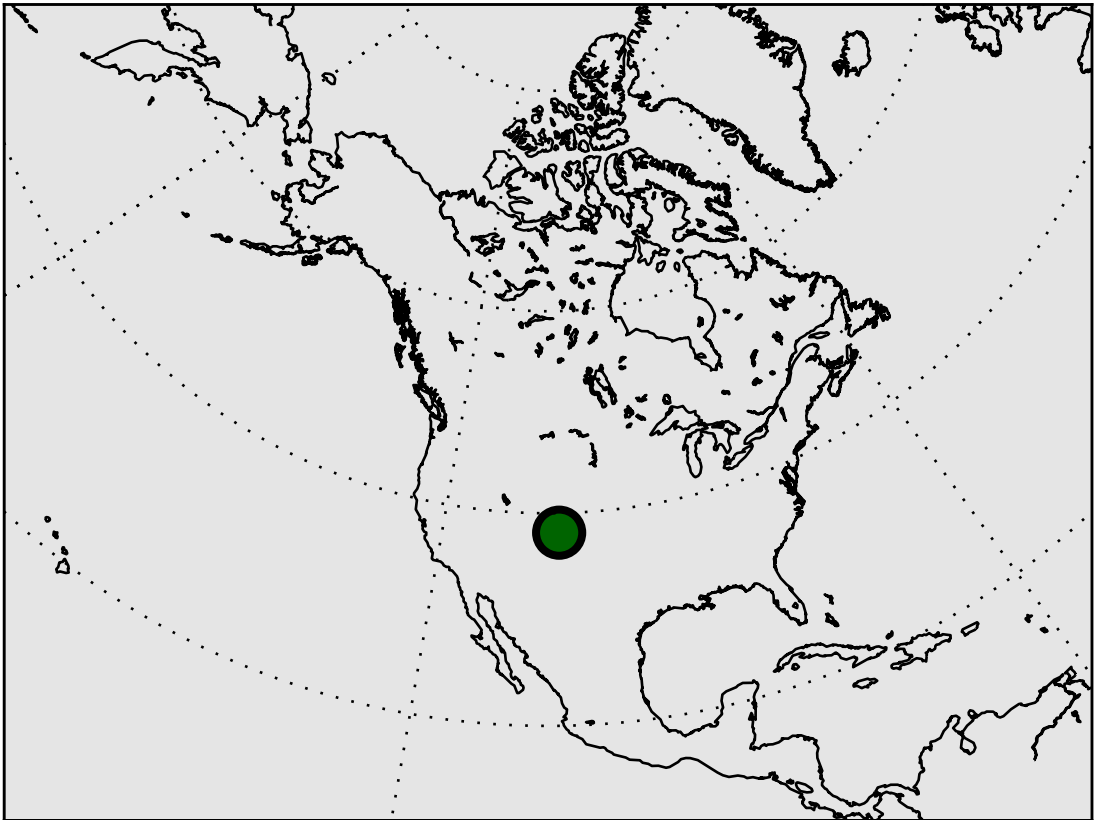

|                    |                                                       |
|--------------------|-------------------------------------------------------|
| Dataset name:      | HermitLake.Anderson.2018                              |
| Archive type:      | LakeSediment                                          |
| Proxy type:        | pollen                                                |
| Variable name:     | Picea/Artemisia                                       |
| Latitude ( ° N):   | 38.0879                                               |
| Longitude ( ° E):  | -105.631                                              |
| Elevation (m):     | 3455.0                                                |
| Interp. variable:  | T                                                     |
| Interp. detail:    | air@surface                                           |
| Interp. season:    | annual                                                |
| Interp. direction: | positive                                              |
| Pub. 1 title:      | Postglacial environmental change of a high-elevati... |
| Pub. 1 authors:    | Anderson, R. Scott;Soltow, Hanna R.;Jimenez-Moreno... |
| Pub. 1 year:       | 2018                                                  |
| Pub. 1 DOI:        | 10.1130/2018.2536(13)                                 |
| Original data URL: | wNAm                                                  |

Proxy data and metadata

LakeSediment | pollen | HermitLake.Anderson.2018 | WEBbbbb5461

Proxy time series: Picea/Pinus

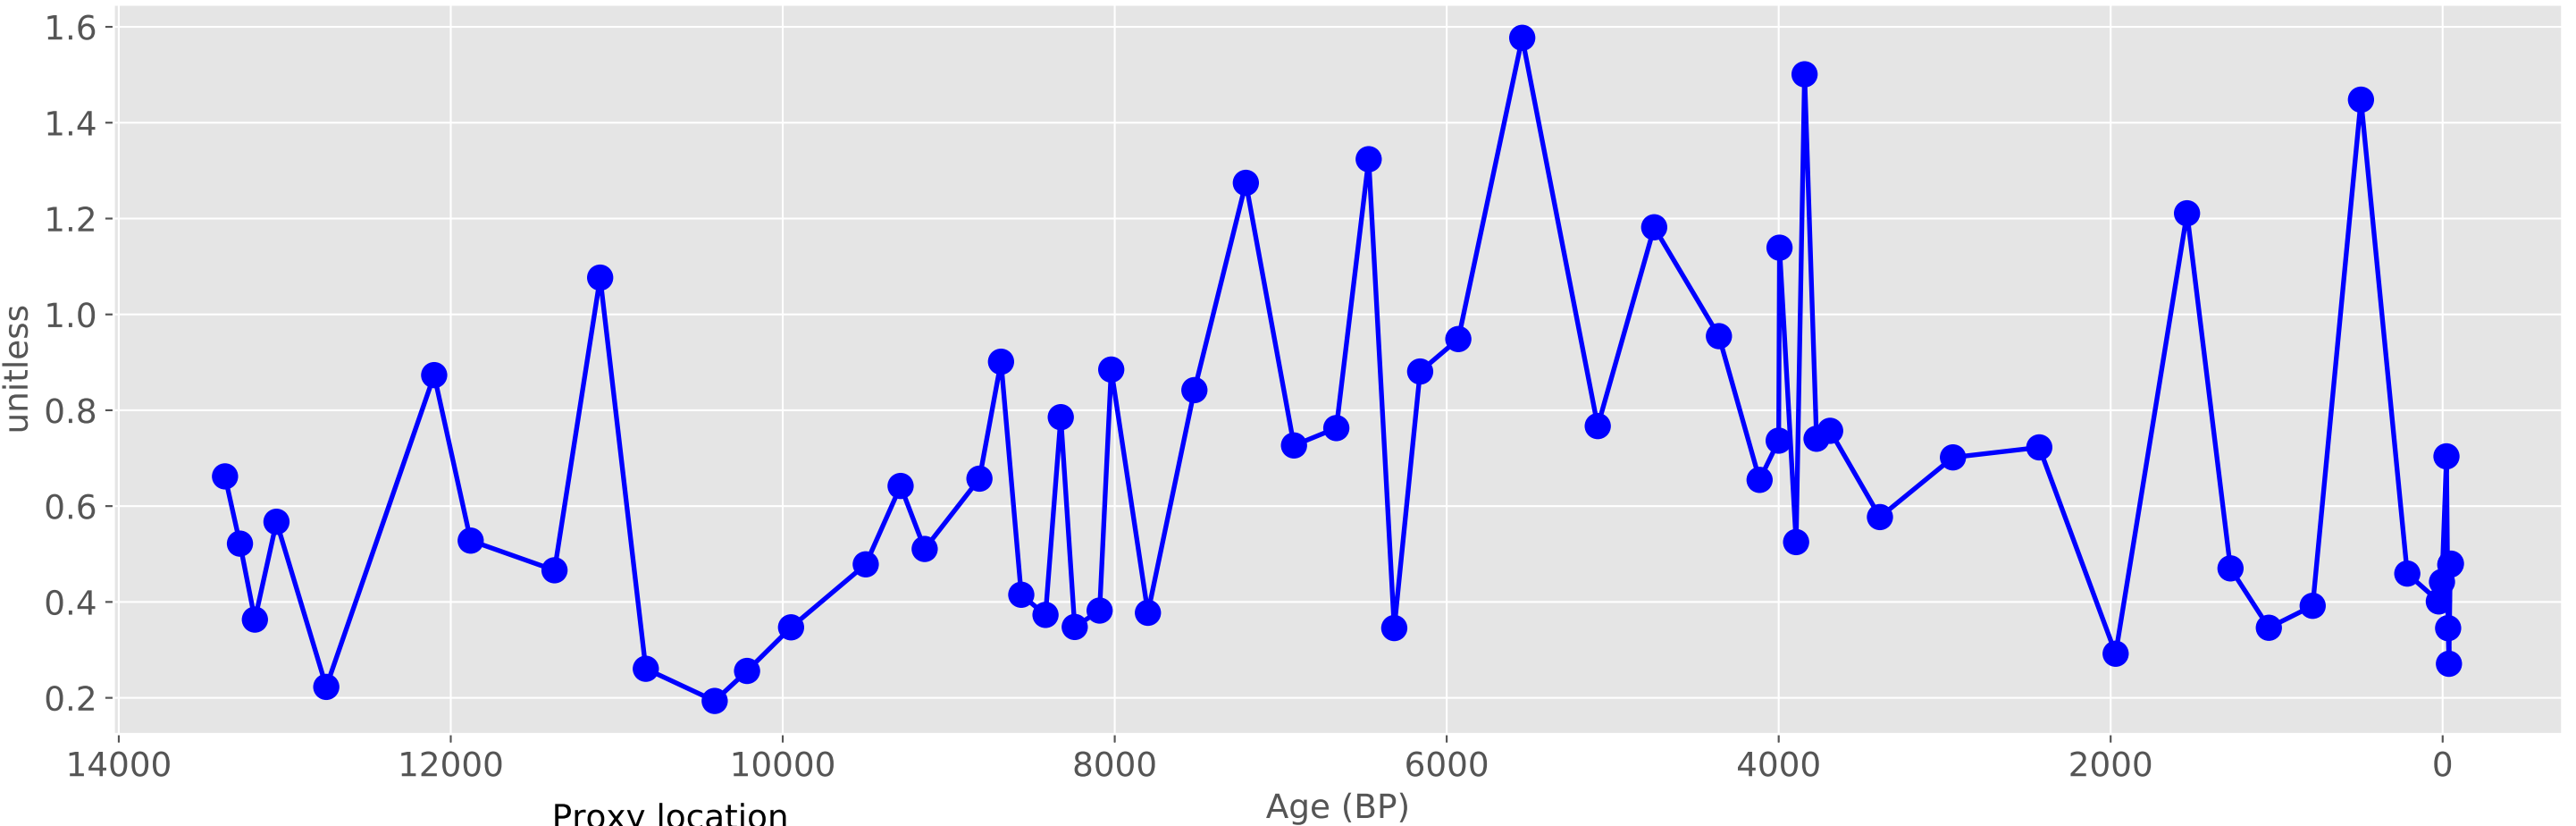

Proxy location  
(38.09 ° N, 105.63 ° W)



|                    |                                                       |
|--------------------|-------------------------------------------------------|
| Dataset name:      | HermitLake.Anderson.2018                              |
| Archive type:      | LakeSediment                                          |
| Proxy type:        | pollen                                                |
| Variable name:     | Picea/Pinus                                           |
| Latitude ( ° N):   | 38.0879                                               |
| Longitude ( ° E):  | -105.631                                              |
| Elevation (m):     | 3455.0                                                |
| Interp. variable:  | T                                                     |
| Interp. detail:    | air@surface                                           |
| Interp. season:    | annual                                                |
| Interp. direction: | positive                                              |
| Pub. 1 title:      | Postglacial environmental change of a high-elevati... |
| Pub. 1 authors:    | Anderson, R. Scott;Soltow, Hanna R.;Jimenez-Moreno... |
| Pub. 1 year:       | 2018                                                  |
| Pub. 1 DOI:        | 10.1130/2018.2536(13)                                 |
| Original data URL: | wNAm                                                  |



Proxy data and metadata  
LakeSediment | pollen | HermitLake.Anderson.2018 | WEBc47af866

Proxy time series: Pinyon

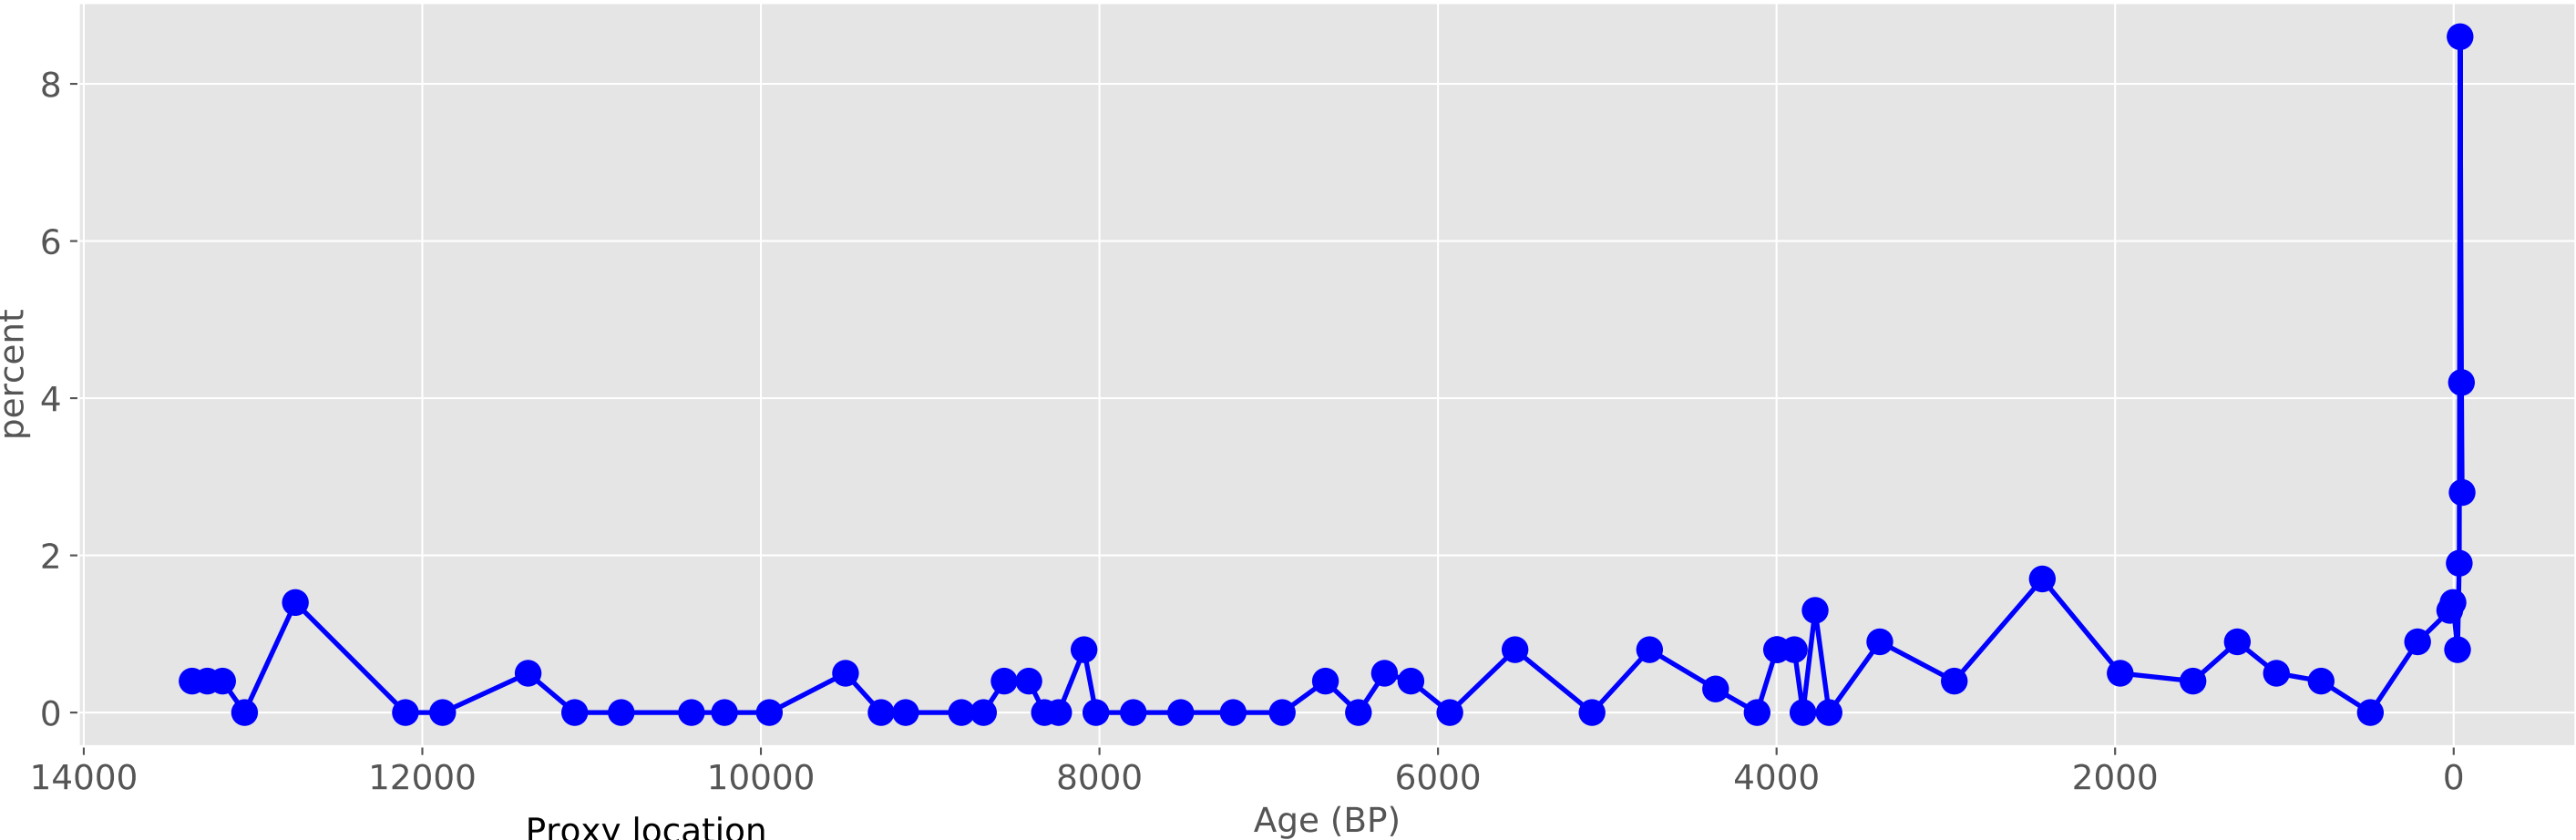

Proxy location  
(38.09 ° N, 105.63 ° W)



|                    |                                                       |
|--------------------|-------------------------------------------------------|
| Dataset name:      | HermitLake.Anderson.2018                              |
| Archive type:      | LakeSediment                                          |
| Proxy type:        | pollen                                                |
| Variable name:     | Pinyon                                                |
| Latitude ( ° N):   | 38.0879                                               |
| Longitude ( ° E):  | -105.631                                              |
| Elevation (m):     | 3455.0                                                |
| Interp. variable:  | P-E                                                   |
| Interp. detail:    | @surface                                              |
| Interp. season:    | winterOnly                                            |
| Interp. direction: | positive                                              |
| Pub. 1 title:      | Postglacial environmental change of a high-elevati... |
| Pub. 1 authors:    | Anderson, R. Scott;Soltow, Hanna R.;Jimenez-Moreno... |
| Pub. 1 year:       | 2018                                                  |
| Pub. 1 DOI:        | 10.1130/2018.2536(13)                                 |
| Original data URL: | wNAm                                                  |

Proxy data and metadata  
LakeSediment | pollen | Posy.Shafer.1989 | M2Lejdigk7uP

Proxy time series: precipitation

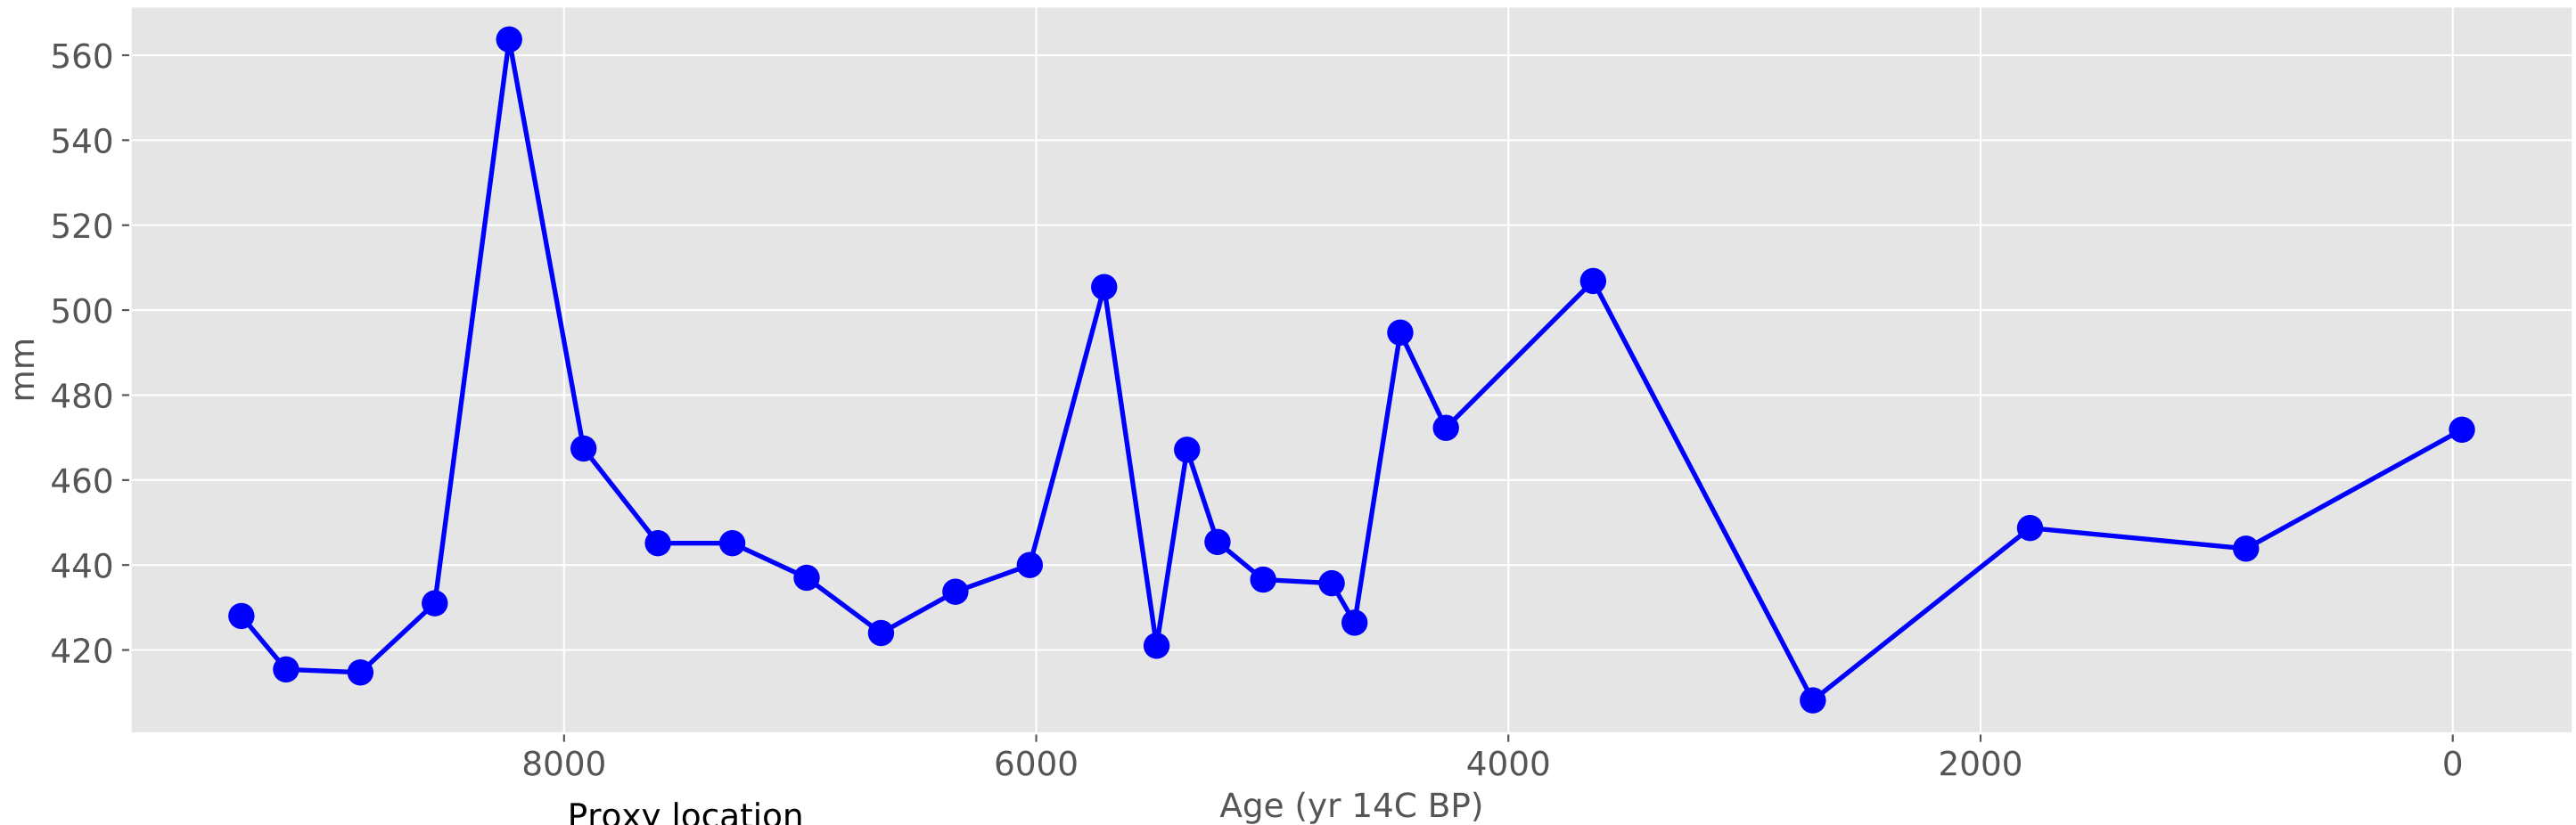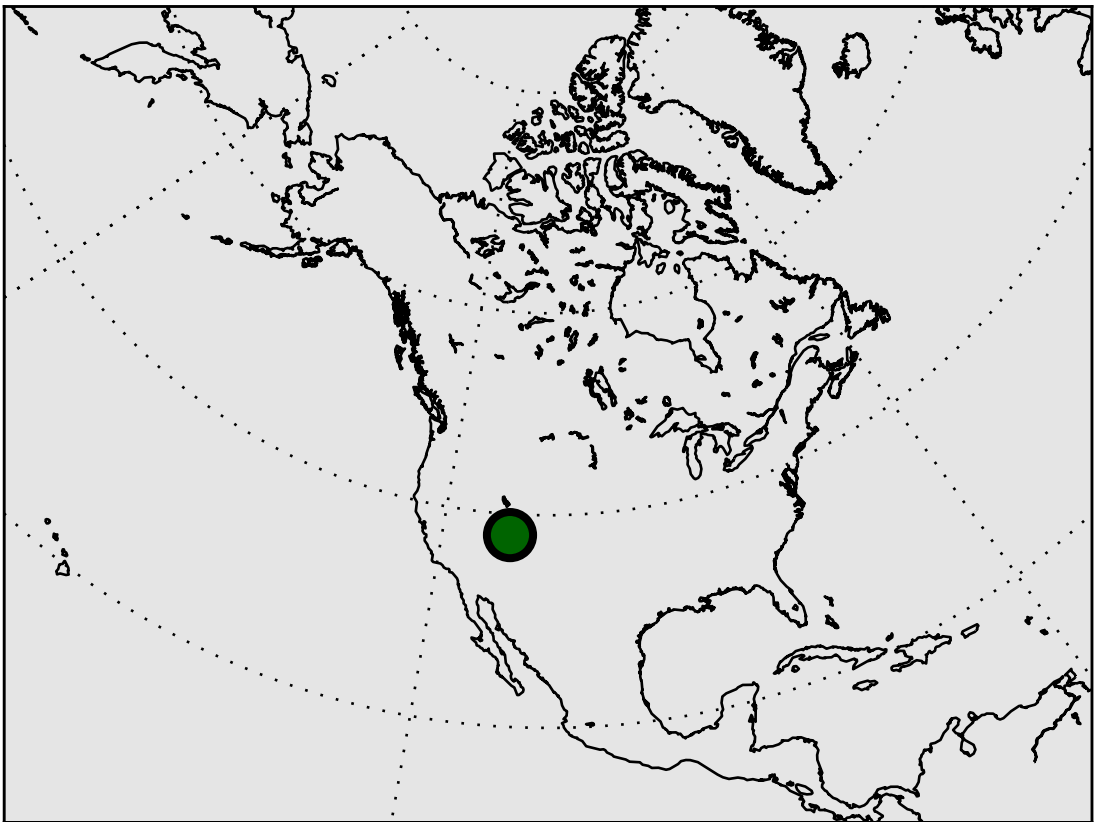

|                    |                                                       |
|--------------------|-------------------------------------------------------|
| Dataset name:      | Posy.Shafer.1989                                      |
| Archive type:      | LakeSediment                                          |
| Proxy type:        | pollen                                                |
| Variable name:     | precipitation                                         |
| Latitude ( ° N):   | 37.94                                                 |
| Longitude ( ° E):  | -111.7                                                |
| Elevation (m):     | 2653.0                                                |
| Interp. variable:  | P                                                     |
| Interp. detail:    | amount@surface                                        |
| Interp. season:    | annual                                                |
| Interp. direction: | positive                                              |
| Pub. 1 title:      | The timing of late Quaternary monsoon precipitatio... |
| Pub. 1 authors:    | Shafer, D.S.                                          |
| Pub. 1 year:       | 1989                                                  |
| Pub. 1 DOI:        | Shafer, D.S. 1989. The timing of late Quaternary m... |
| Original data URL: | www.ncdc.noaa.gov/paleo/study/27330                   |

Proxy data and metadata  
LakeSediment | pollen | Posy.Shafer.1989 | M2Lf5zj1b7vP

Proxy time series: temperature

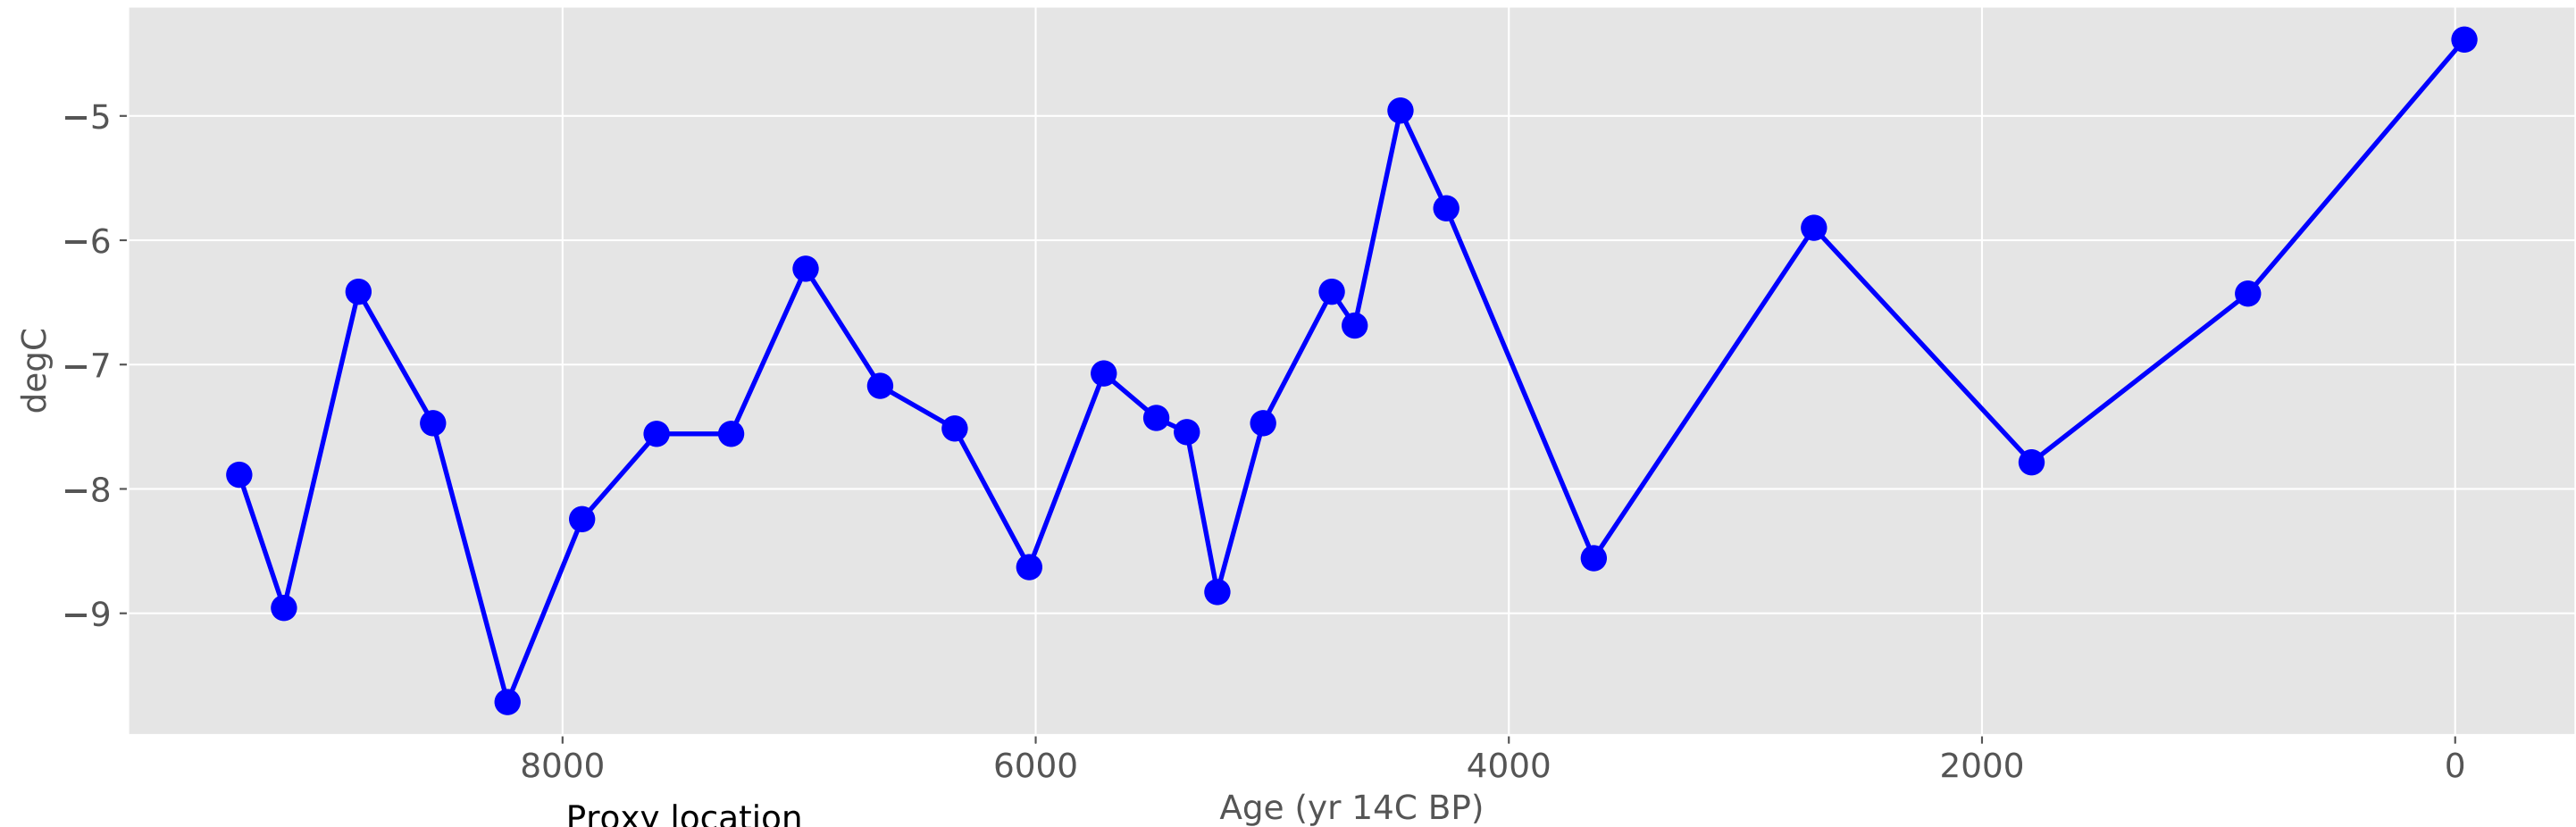

Proxy location  
(37.94 ° N, 111.70 ° W)

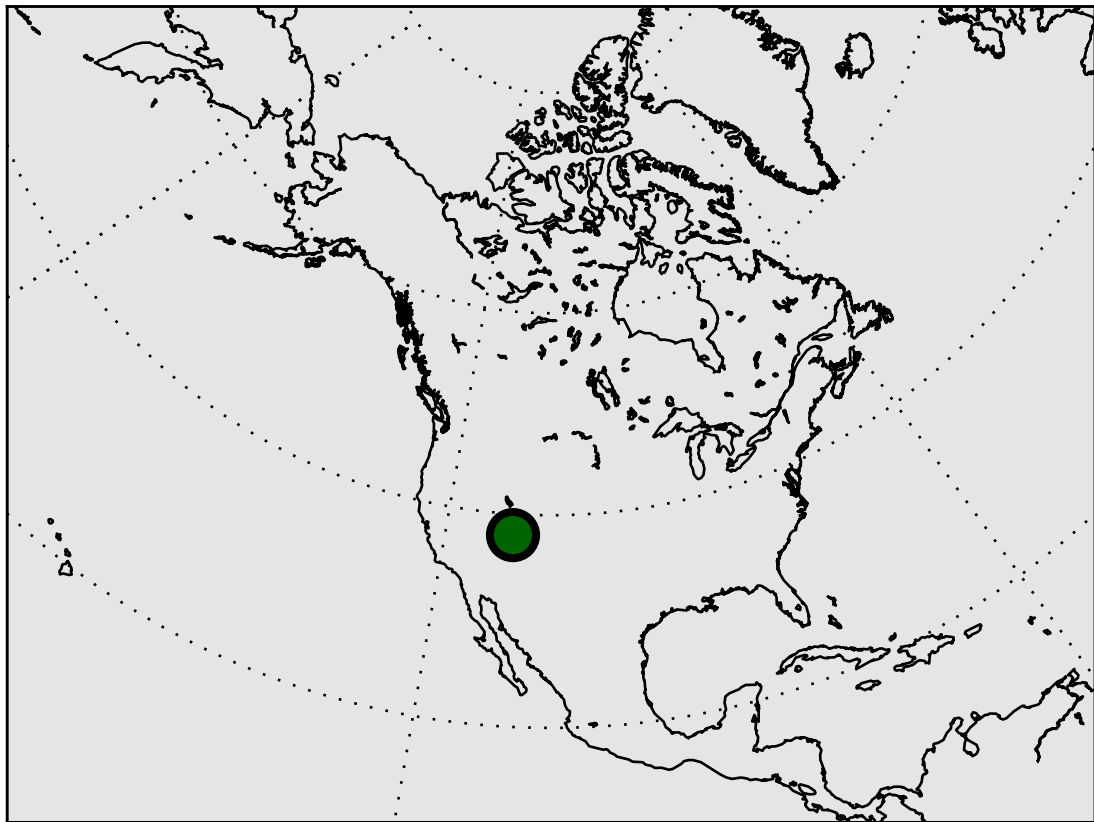

|                    |                                                                                              |
|--------------------|----------------------------------------------------------------------------------------------|
| Dataset name:      | Posy.Shafer.1989                                                                             |
| Archive type:      | LakeSediment                                                                                 |
| Proxy type:        | pollen                                                                                       |
| Variable name:     | temperature                                                                                  |
| Latitude ( ° N):   | 37.94                                                                                        |
| Longitude ( ° E):  | -111.7                                                                                       |
| Elevation (m):     | 2653.0                                                                                       |
| Interp. variable:  | T                                                                                            |
| Interp. detail:    | air@surface                                                                                  |
| Interp. season:    | winter+                                                                                      |
| Interp. direction: | positive                                                                                     |
| Pub. 1 title:      | The timing of late Quaternary monsoon precipitatio...                                        |
| Pub. 1 authors:    | Shafer, D.S.                                                                                 |
| Pub. 1 year:       | 1989                                                                                         |
| Pub. 1 DOI:        | Shafer, D.S. 1989. The timing of late Quaternary m...                                        |
| Original data URL: | <a href="http://www.ncdc.noaa.gov/paleo/study/27330">www.ncdc.noaa.gov/paleo/study/27330</a> |

Proxy data and metadata  
LakeSediment | pollen | Posy.Shafer.1989 | M2Liaj596e6P

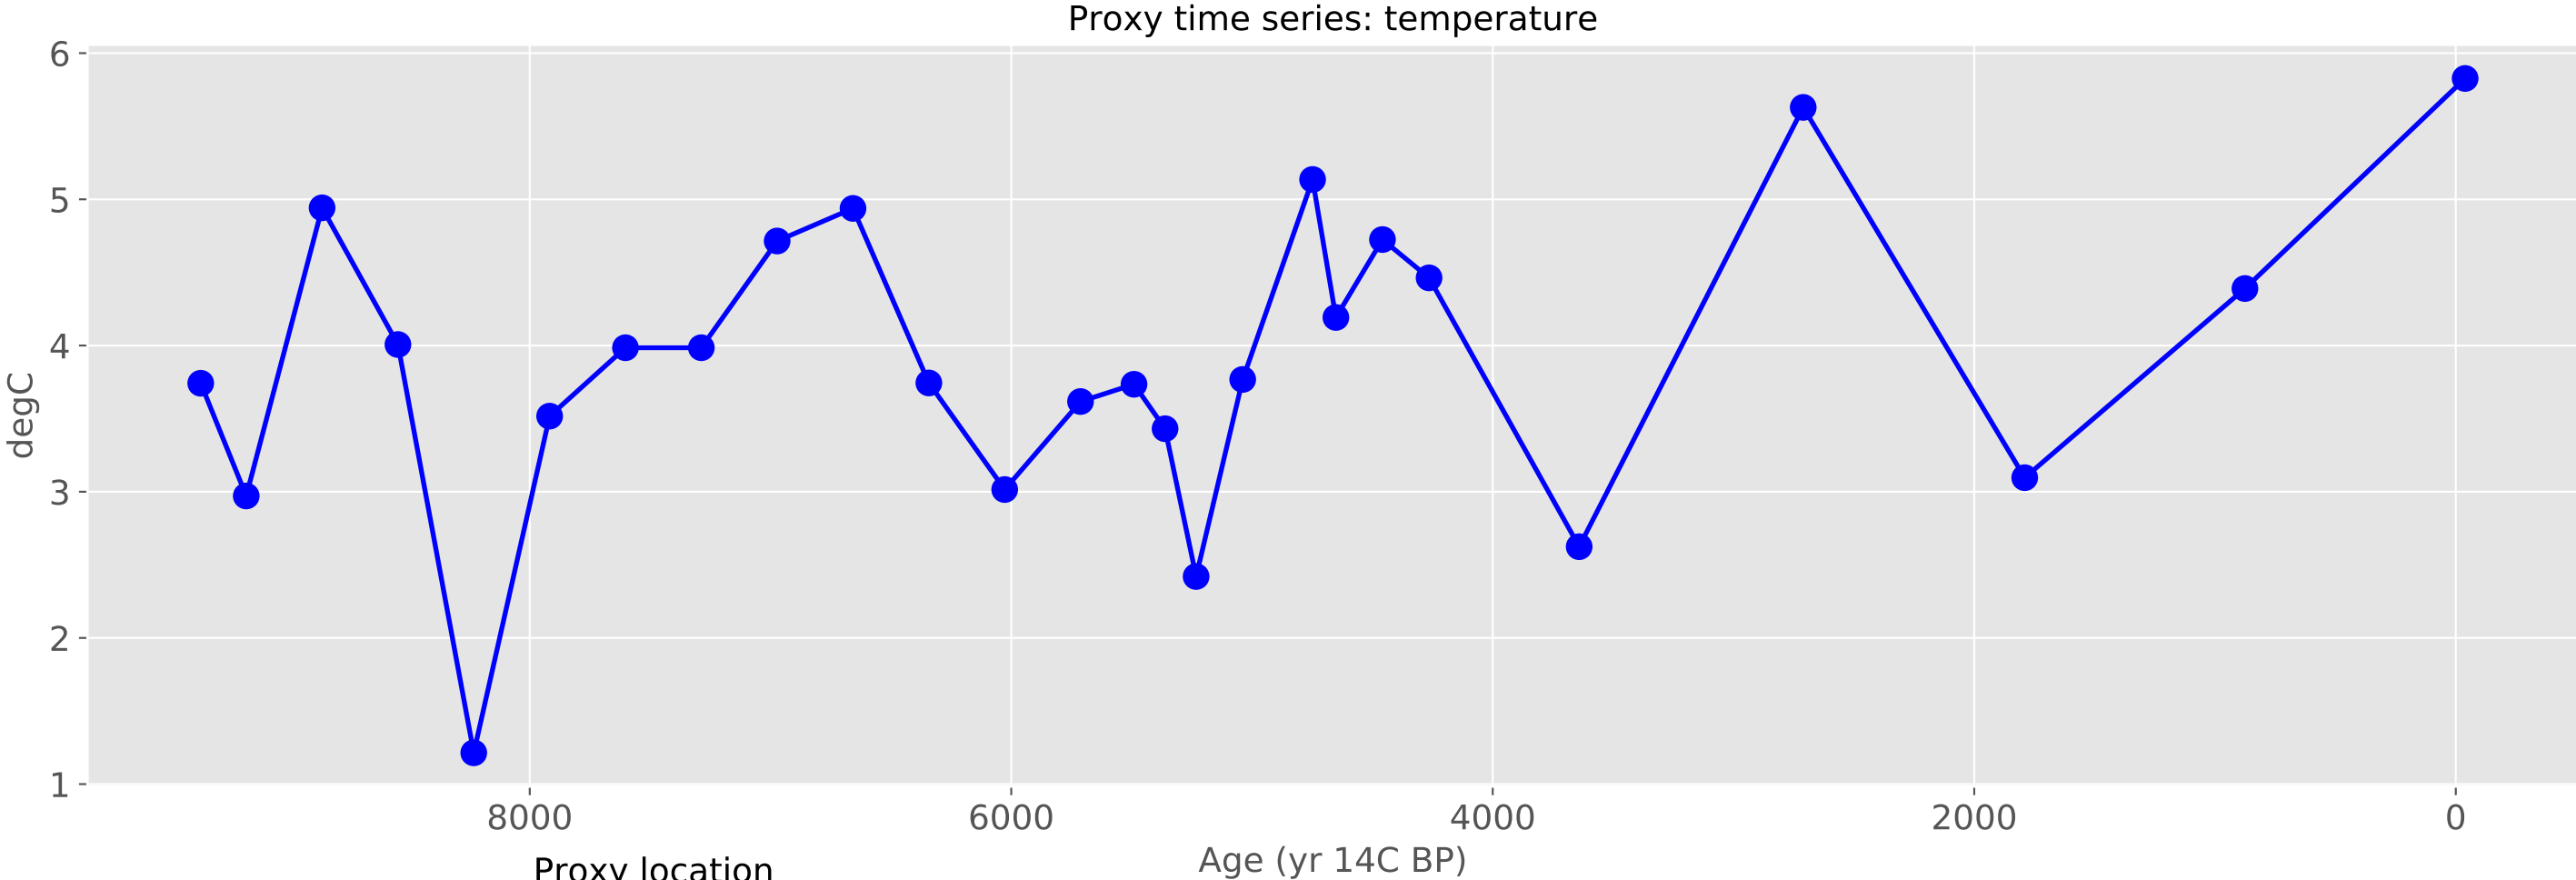

Proxy location  
(37.94 ° N, 111.70 ° W)

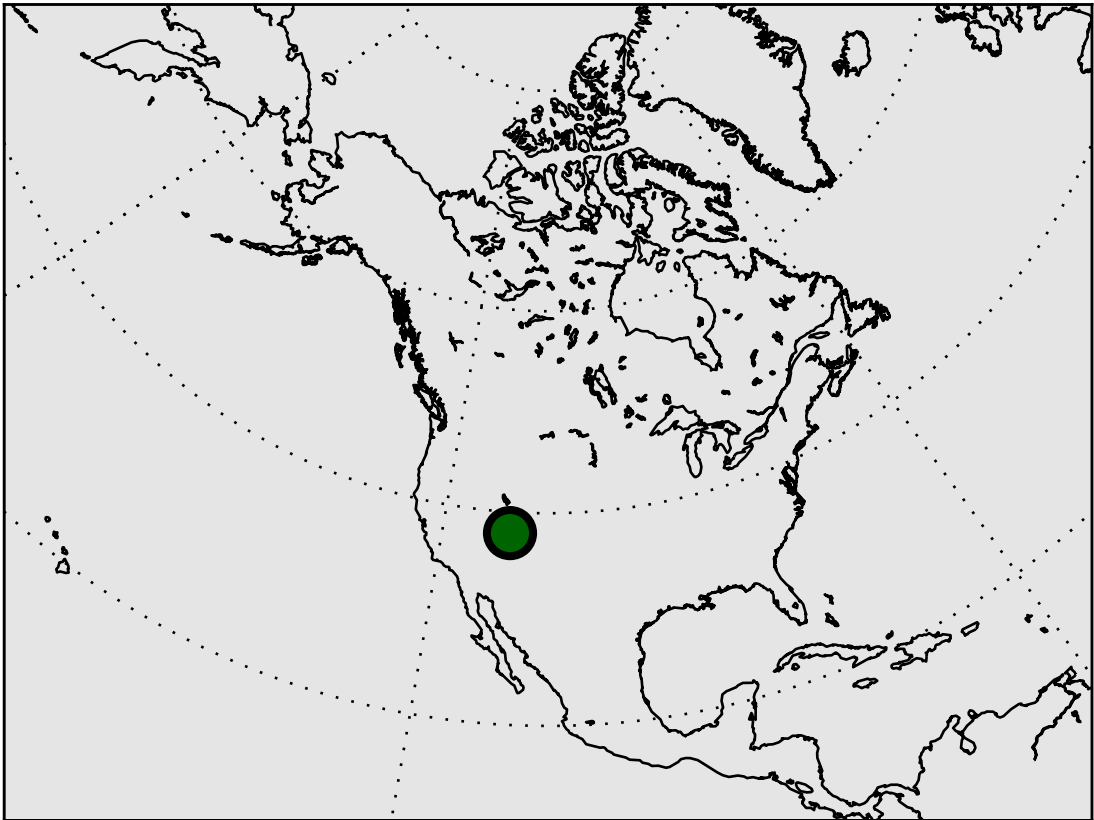

|                    |                                                       |
|--------------------|-------------------------------------------------------|
| Dataset name:      | Posy.Shafer.1989                                      |
| Archive type:      | LakeSediment                                          |
| Proxy type:        | pollen                                                |
| Variable name:     | temperature                                           |
| Latitude ( ° N):   | 37.94                                                 |
| Longitude ( ° E):  | -111.7                                                |
| Elevation (m):     | 2653.0                                                |
| Interp. variable:  | T                                                     |
| Interp. detail:    | air@surface                                           |
| Interp. season:    | annual                                                |
| Interp. direction: | positive                                              |
| Pub. 1 title:      | The timing of late Quaternary monsoon precipitatio... |
| Pub. 1 authors:    | Shafer, D.S.                                          |
| Pub. 1 year:       | 1989                                                  |
| Pub. 1 DOI:        | Shafer, D.S. 1989. The timing of late Quaternary m... |
| Original data URL: | www.ncdc.noaa.gov/paleo/study/27330                   |

Proxy data and metadata  
LakeSediment | pollen | Posy.Shafer.1989 | M2Lipgt0z5oP

Proxy time series: temperature

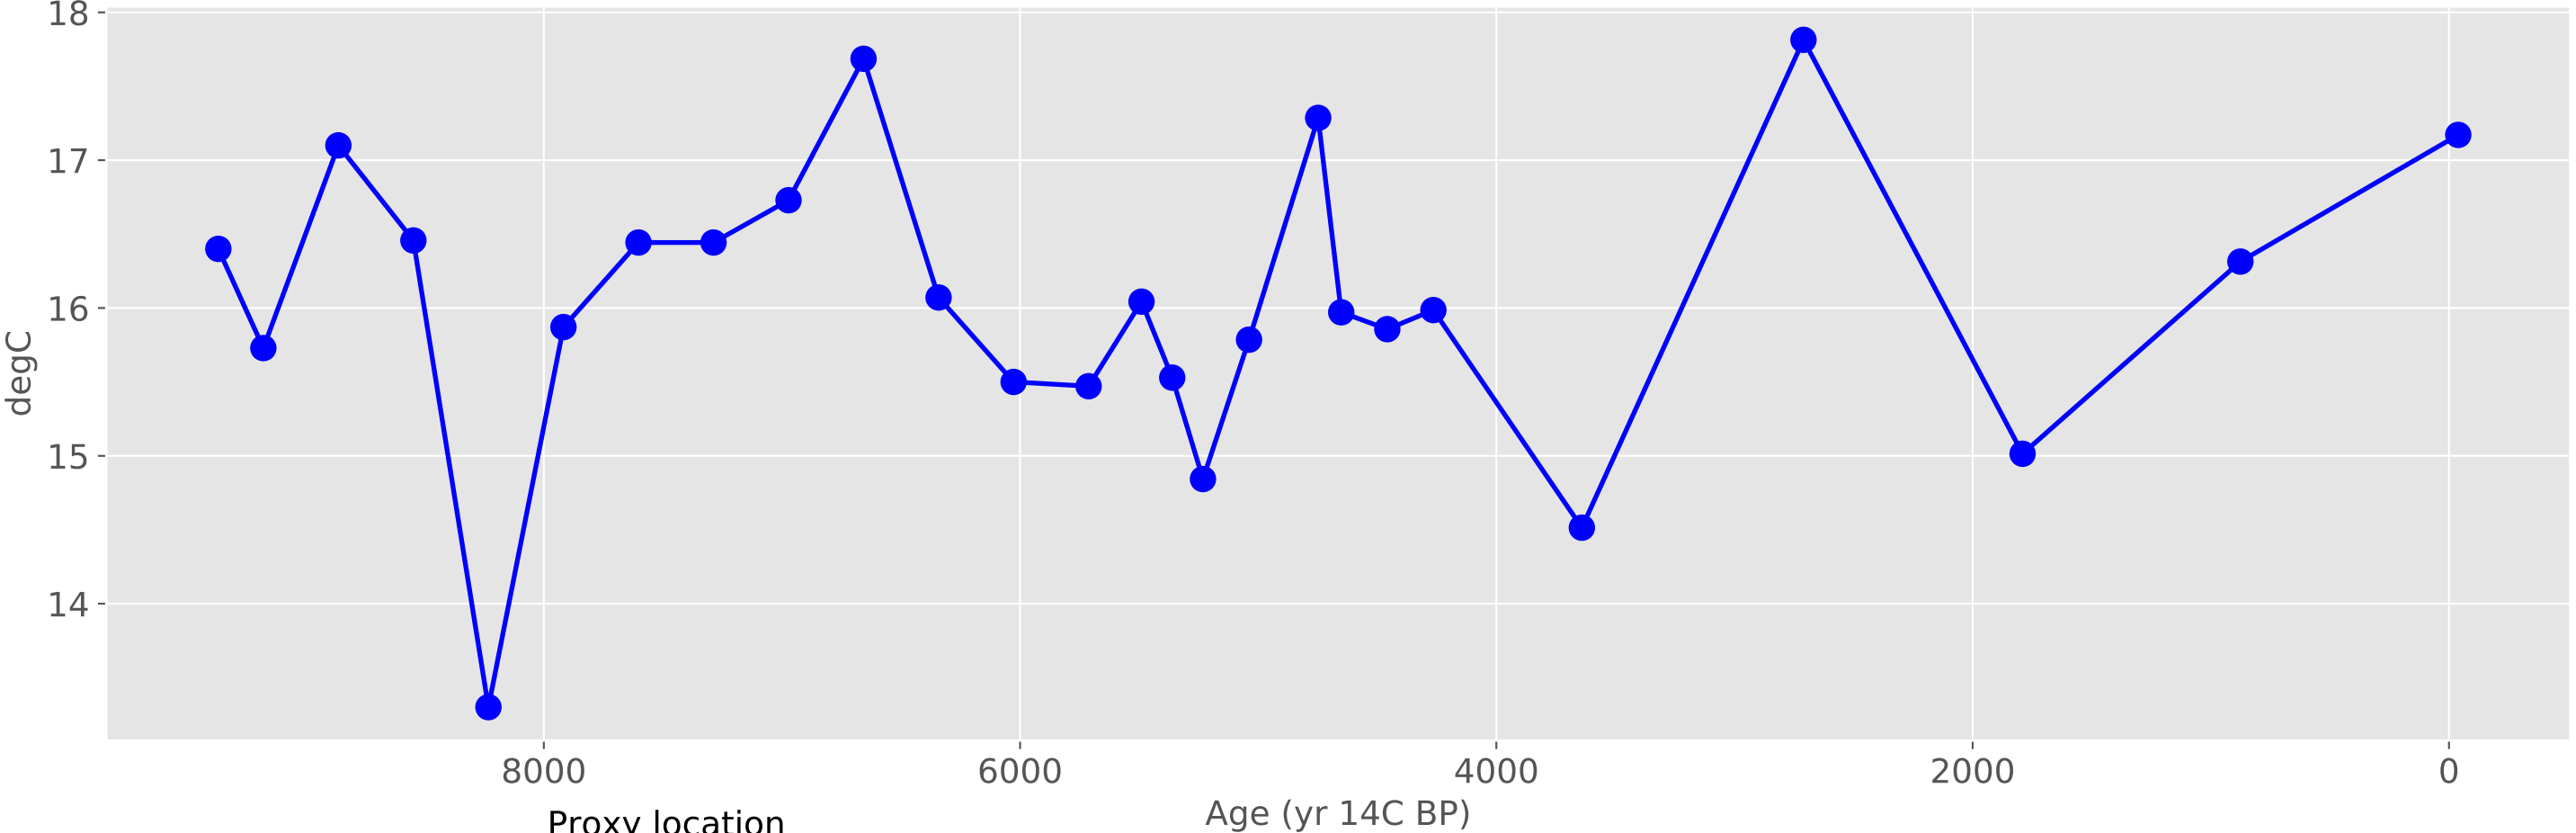

|                    |                                                                                              |
|--------------------|----------------------------------------------------------------------------------------------|
| Dataset name:      | Posy.Shafer.1989                                                                             |
| Archive type:      | LakeSediment                                                                                 |
| Proxy type:        | pollen                                                                                       |
| Variable name:     | temperature                                                                                  |
| Latitude ( ° N):   | 37.94                                                                                        |
| Longitude ( ° E):  | -111.7                                                                                       |
| Elevation (m):     | 2653.0                                                                                       |
| Interp. variable:  | T                                                                                            |
| Interp. detail:    | air@surface                                                                                  |
| Interp. season:    | summer+                                                                                      |
| Interp. direction: | positive                                                                                     |
| Pub. 1 title:      | The timing of late Quaternary monsoon precipitatio...                                        |
| Pub. 1 authors:    | Shafer, D.S.                                                                                 |
| Pub. 1 year:       | 1989                                                                                         |
| Pub. 1 DOI:        | Shafer, D.S. 1989. The timing of late Quaternary m...                                        |
| Original data URL: | <a href="http://www.ncdc.noaa.gov/paleo/study/27330">www.ncdc.noaa.gov/paleo/study/27330</a> |

Proxy data and metadata  
LakeSediment | pollen | LittleMolas.Toney.2006 | WEB124e2dfe

Proxy time series: Picea/Artemisia

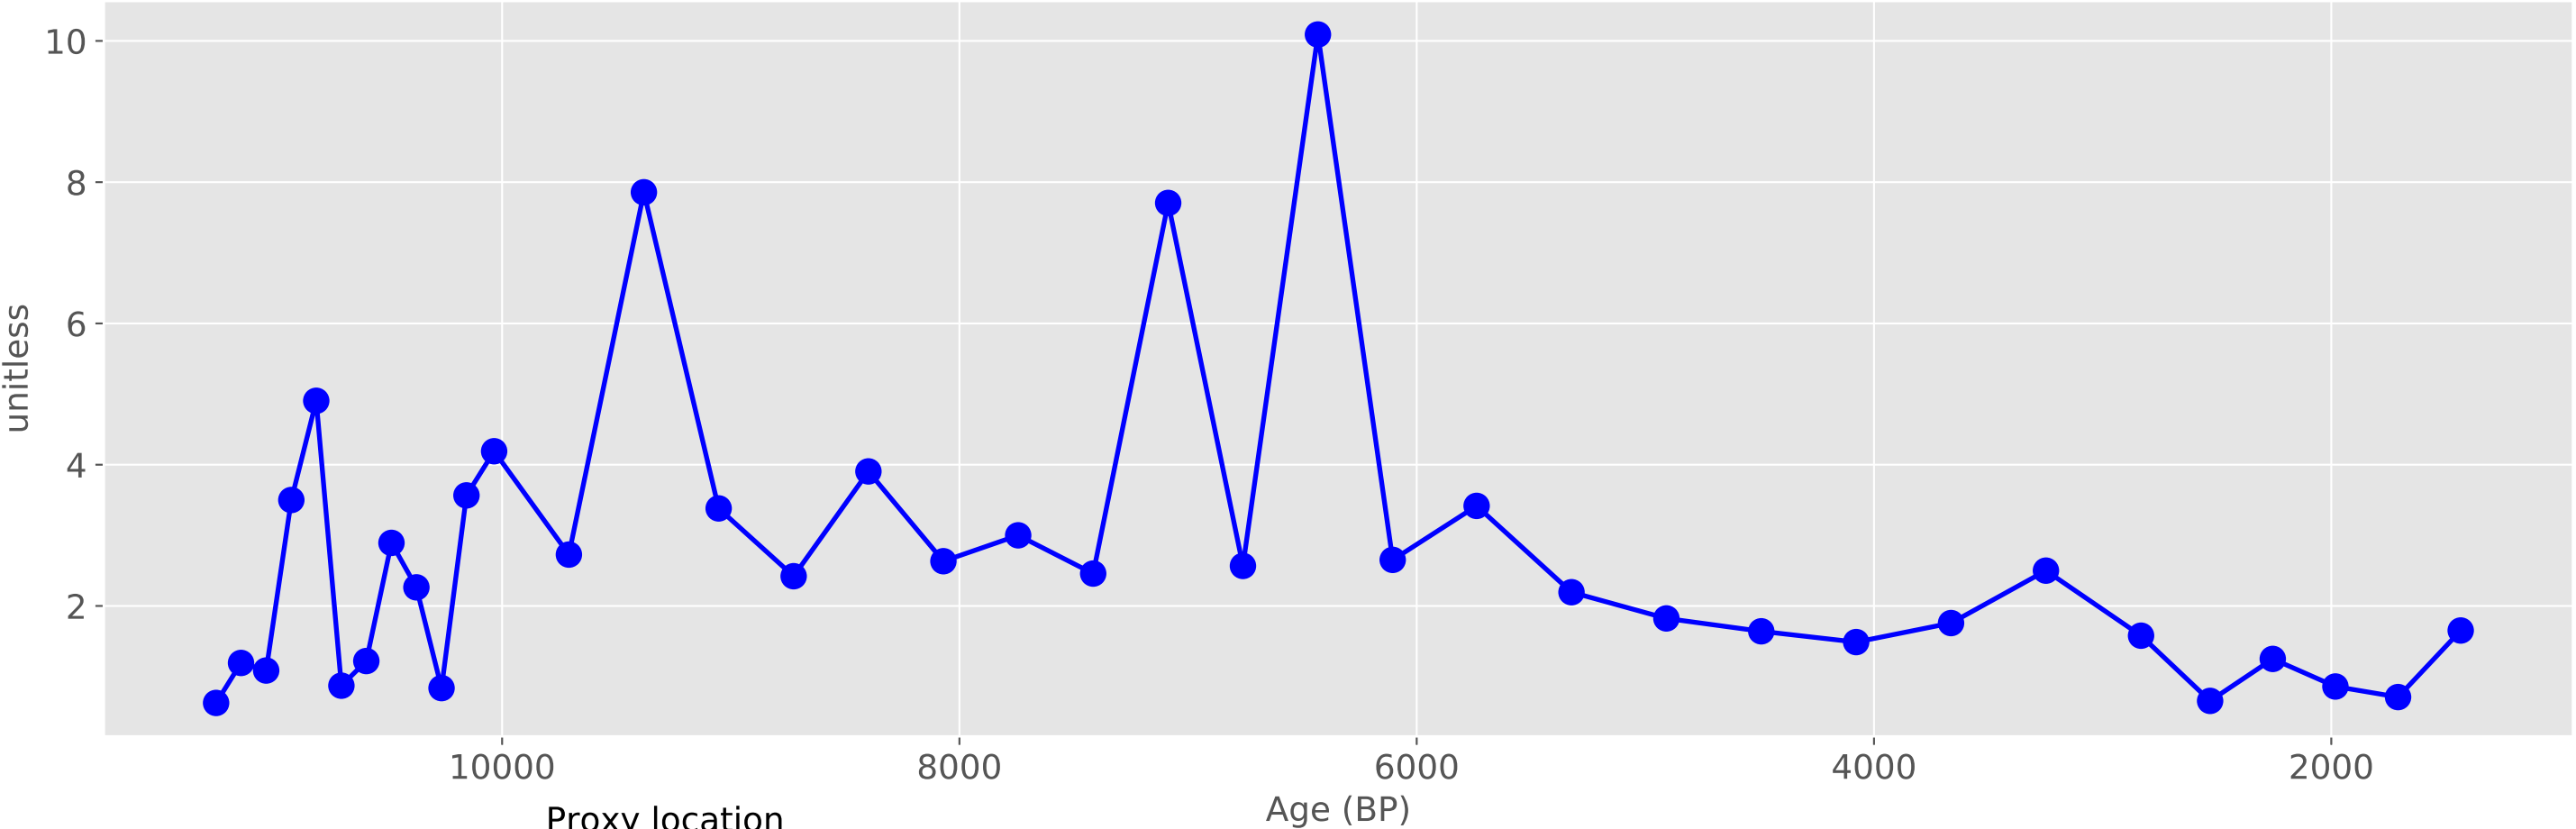

Proxy location  
(37.74 ° N, 107.71 ° W)

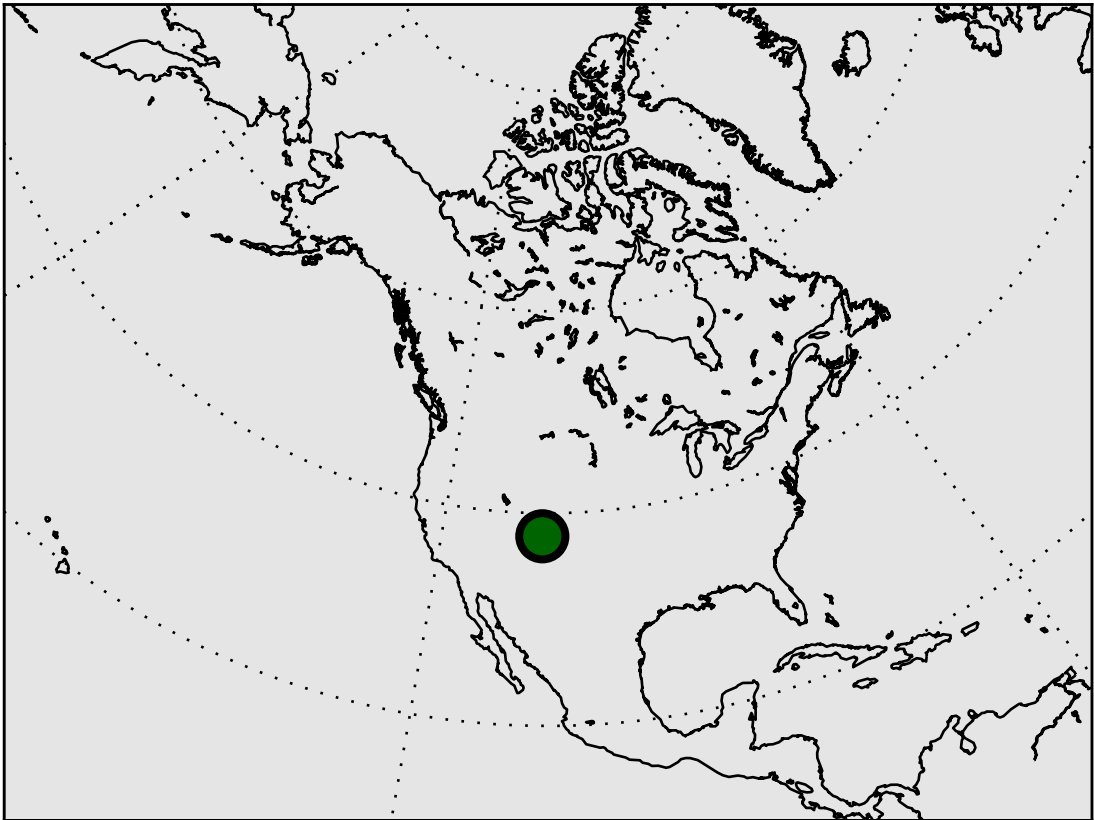

|                    |                                                       |
|--------------------|-------------------------------------------------------|
| Dataset name:      | LittleMolas.Toney.2006                                |
| Archive type:      | LakeSediment                                          |
| Proxy type:        | pollen                                                |
| Variable name:     | Picea/Artemisia                                       |
| Latitude ( ° N):   | 37.742                                                |
| Longitude ( ° E):  | -107.7078                                             |
| Elevation (m):     | 3330.0                                                |
| Interp. variable:  | T                                                     |
| Interp. detail:    | air@surface                                           |
| Interp. season:    | annual                                                |
| Interp. direction: | positive                                              |
| Pub. 1 title:      | A postglacial palaeoecological record from the San... |
| Pub. 1 authors:    | Toney, Jaime L.;Anderson, R. Scott                    |
| Pub. 1 year:       | 2006                                                  |
| Pub. 1 DOI:        | 10.1191/0959683606hl946rp                             |
| Original data URL: | wNAm                                                  |



Proxy data and metadata  
LakeSediment | pollen | LittleMolas.Toney.2006 | WEB66dc7311

Proxy time series: Pinus/Artemisia

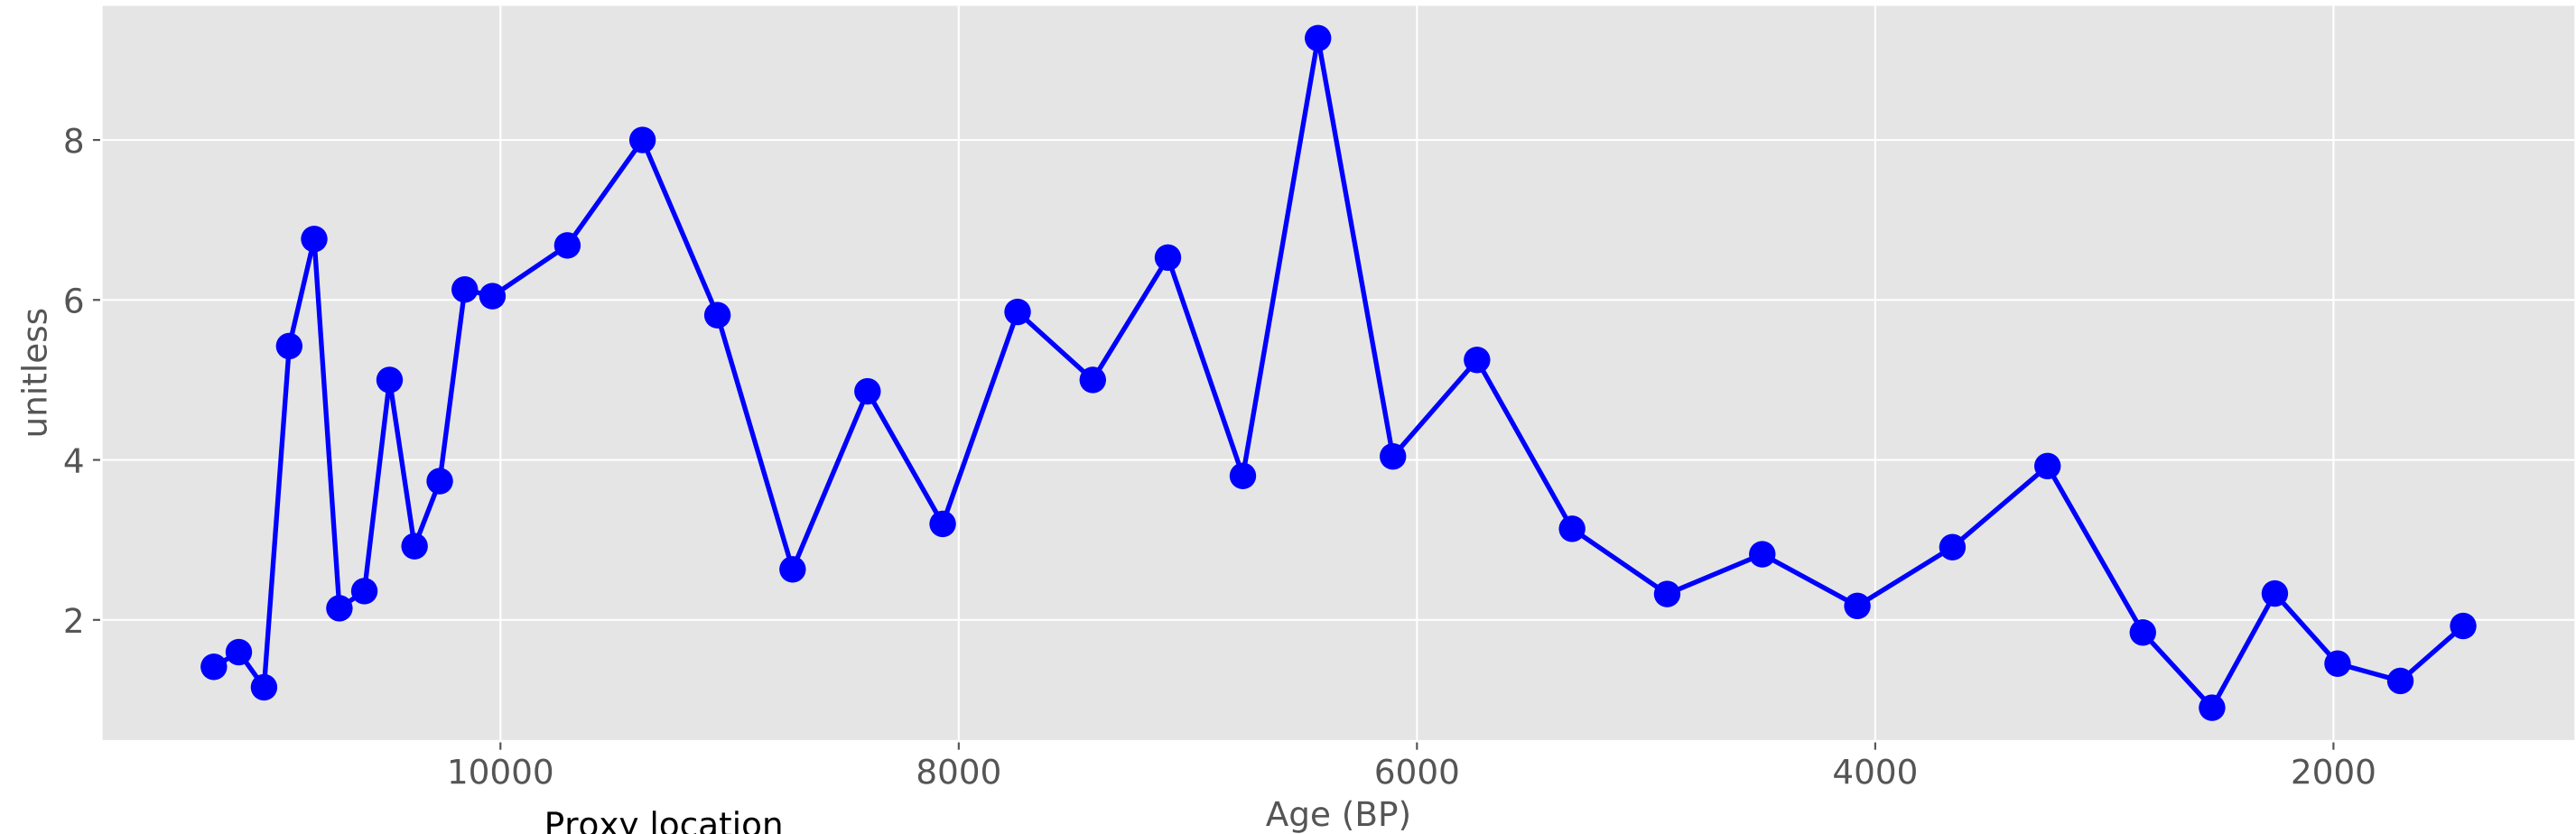

Proxy location  
(37.74 ° N, 107.71 ° W)

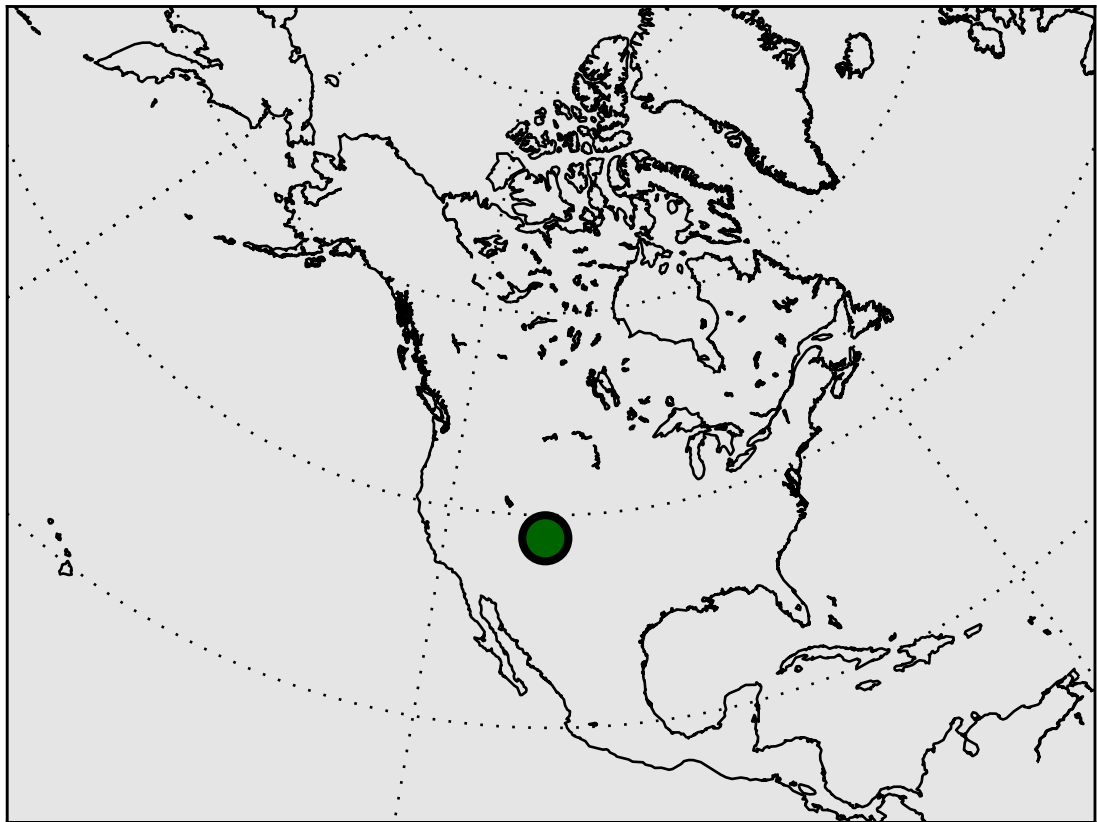

|                    |                                                       |
|--------------------|-------------------------------------------------------|
| Dataset name:      | LittleMolas.Toney.2006                                |
| Archive type:      | LakeSediment                                          |
| Proxy type:        | pollen                                                |
| Variable name:     | Pinus/Artemisia                                       |
| Latitude ( ° N):   | 37.742                                                |
| Longitude ( ° E):  | -107.7078                                             |
| Elevation (m):     | 3330.0                                                |
| Interp. variable:  | T                                                     |
| Interp. detail:    | air@surface                                           |
| Interp. season:    | annual                                                |
| Interp. direction: | positive                                              |
| Pub. 1 title:      | A postglacial palaeoecological record from the San... |
| Pub. 1 authors:    | Toney, Jaime L.;Anderson, R. Scott                    |
| Pub. 1 year:       | 2006                                                  |
| Pub. 1 DOI:        | 10.1191/0959683606hl946rp                             |
| Original data URL: | wNA                                                   |

Proxy data and metadata  
LakeSediment | pollen | LittleMolas.Toney.2006 | WEBddceb5d0

Proxy time series: Picea/Pinus

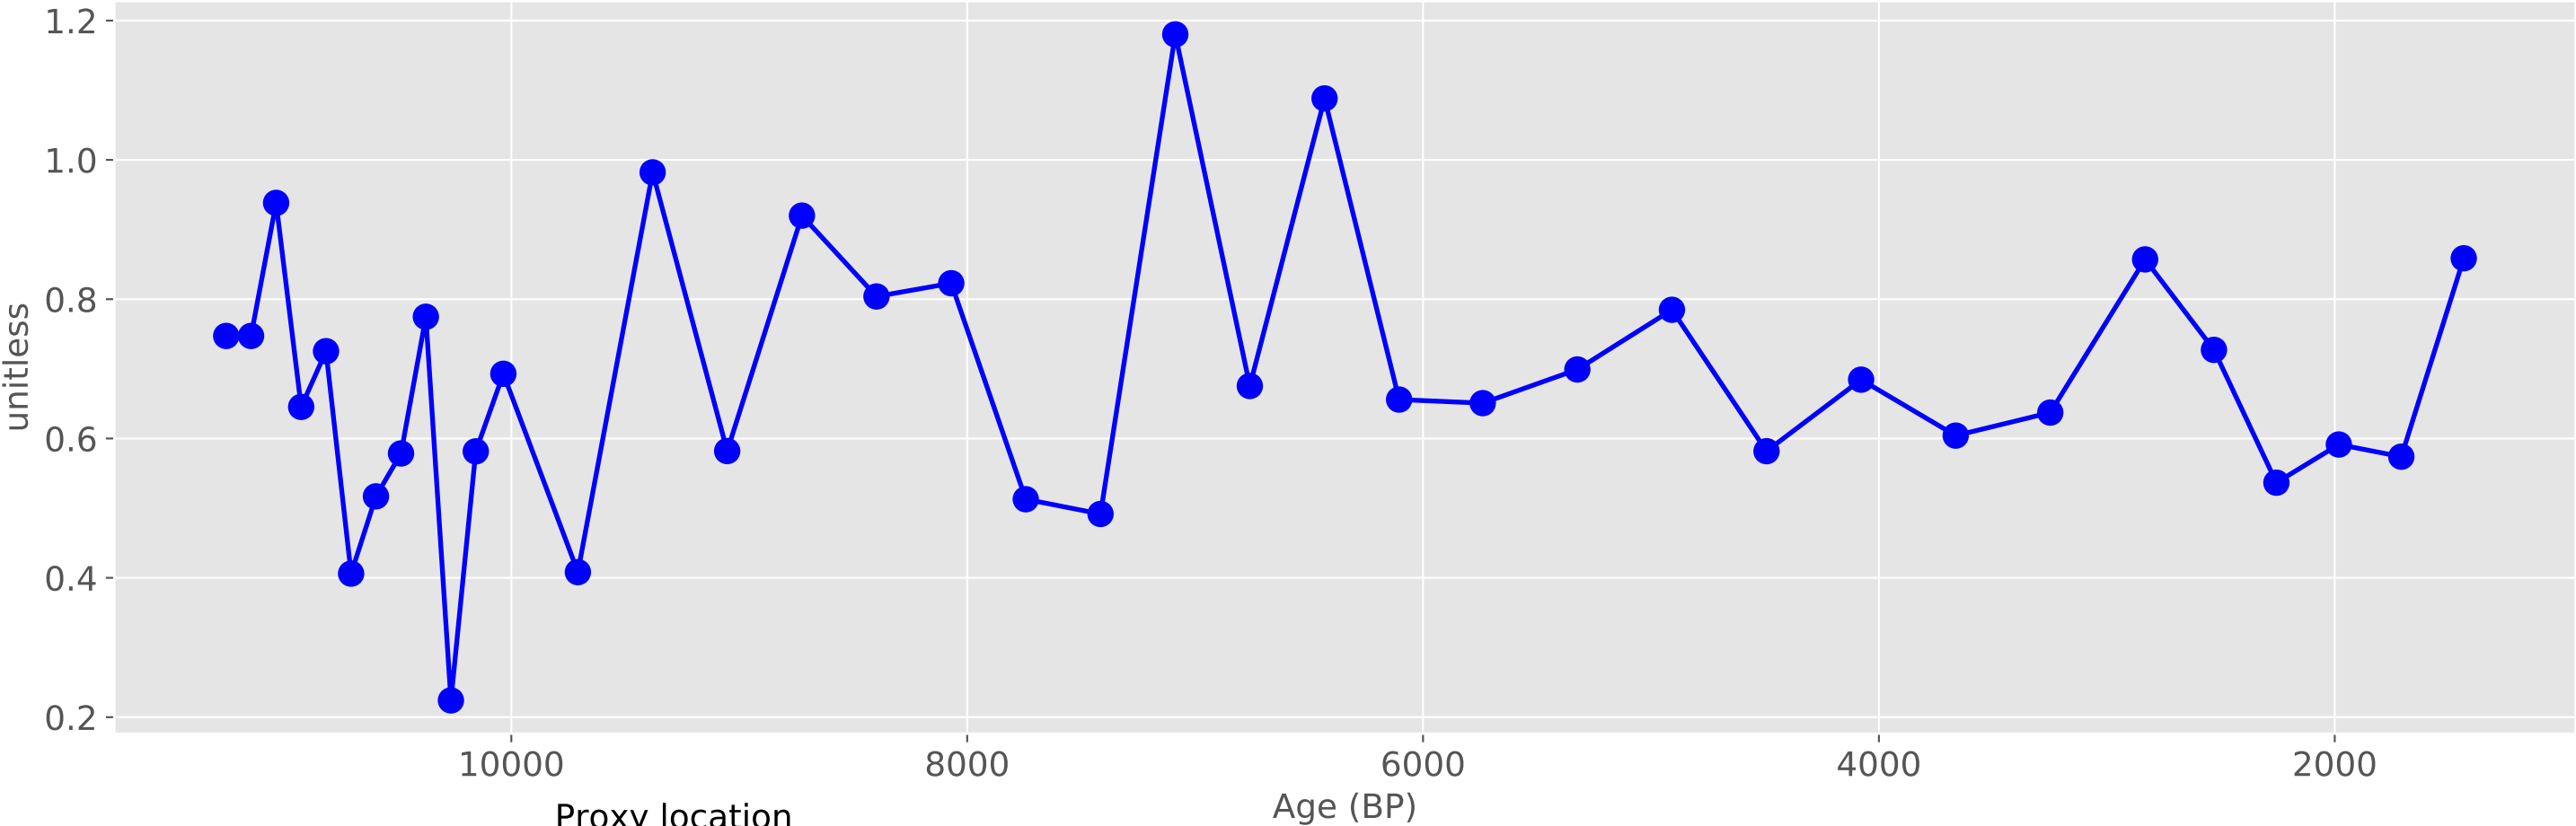

Proxy location  
(37.74 ° N, 107.71 ° W)



|                    |                                                       |
|--------------------|-------------------------------------------------------|
| Dataset name:      | LittleMolas.Toney.2006                                |
| Archive type:      | LakeSediment                                          |
| Proxy type:        | pollen                                                |
| Variable name:     | Picea/Pinus                                           |
| Latitude ( ° N):   | 37.742                                                |
| Longitude ( ° E):  | -107.7078                                             |
| Elevation (m):     | 3330.0                                                |
| Interp. variable:  | T                                                     |
| Interp. detail:    | air@surface                                           |
| Interp. season:    | annual                                                |
| Interp. direction: | positive                                              |
| Pub. 1 title:      | A postglacial palaeoecological record from the San... |
| Pub. 1 authors:    | Toney, Jaime L.;Anderson, R. Scott                    |
| Pub. 1 year:       | 2006                                                  |
| Pub. 1 DOI:        | 10.1191/0959683606hl946rp                             |
| Original data URL: | wNAm                                                  |

Proxy data and metadata  
**LakeSediment | pollen | MorrisPond.Morris.2013 | WEB90956c0c**

Proxy time series: ArtAmb

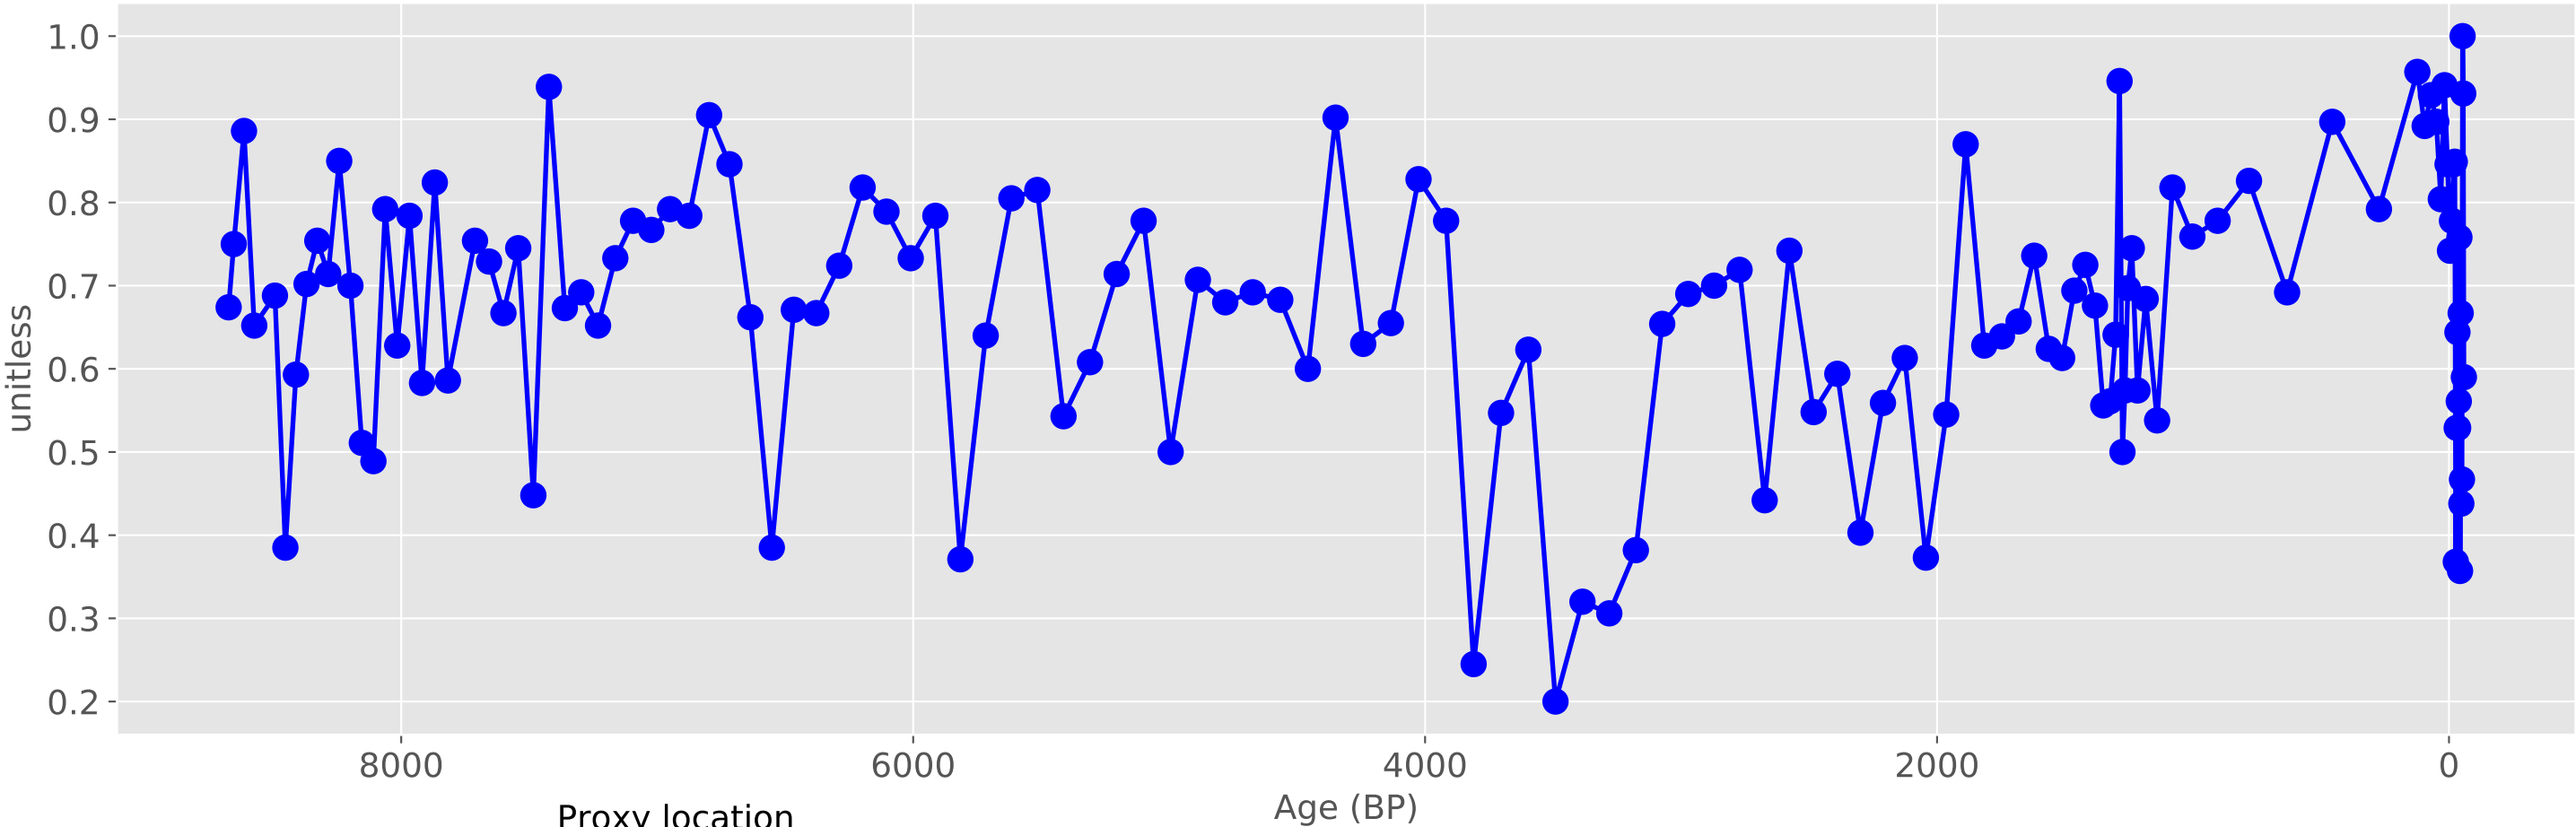

Proxy location  
(37.67 ° N, 112.77 ° W)

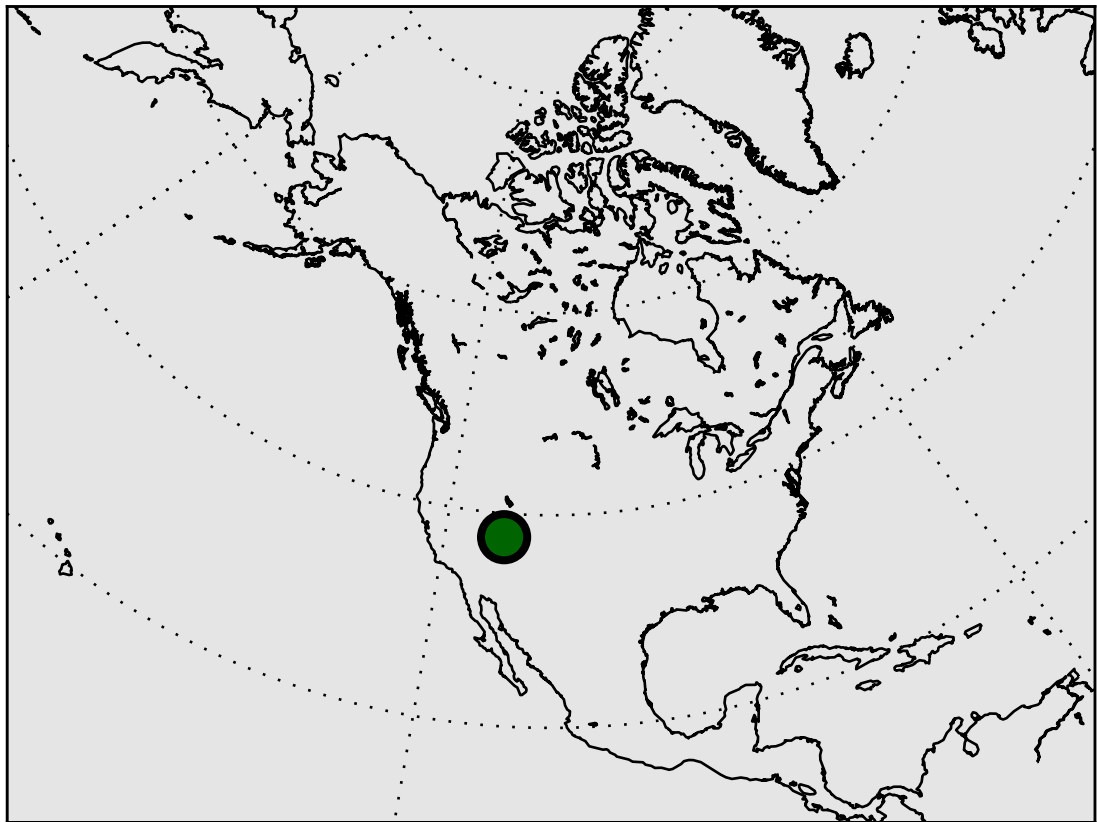

|                    |                                                       |
|--------------------|-------------------------------------------------------|
| Dataset name:      | MorrisPond.Morris.2013                                |
| Archive type:      | LakeSediment                                          |
| Proxy type:        | pollen                                                |
| Variable name:     | ArtAmb                                                |
| Latitude ( ° N):   | 37.6744                                               |
| Longitude ( ° E):  | -112.7747                                             |
| Elevation (m):     | 3126.0                                                |
| Interp. variable:  | P-E                                                   |
| Interp. detail:    | @surface                                              |
| Interp. season:    | summerOnly                                            |
| Interp. direction: | positive                                              |
| Pub. 1 title:      | Using fire regimes to delineate zones in a high-re... |
| Pub. 1 authors:    | Morris, Jesse L.;Brunelle, Andrea;DeRose, R. Justi... |
| Pub. 1 year:       | 2013                                                  |
| Pub. 1 DOI:        | 10.1016/j.yqres.2012.10.002                           |
| Original data URL: | wNA                                                   |

Proxy data and metadata

LakeSediment | pollen | MorrisPond.Morris.2013 | WEBa30eb517

Proxy time series: ArtChenoSar

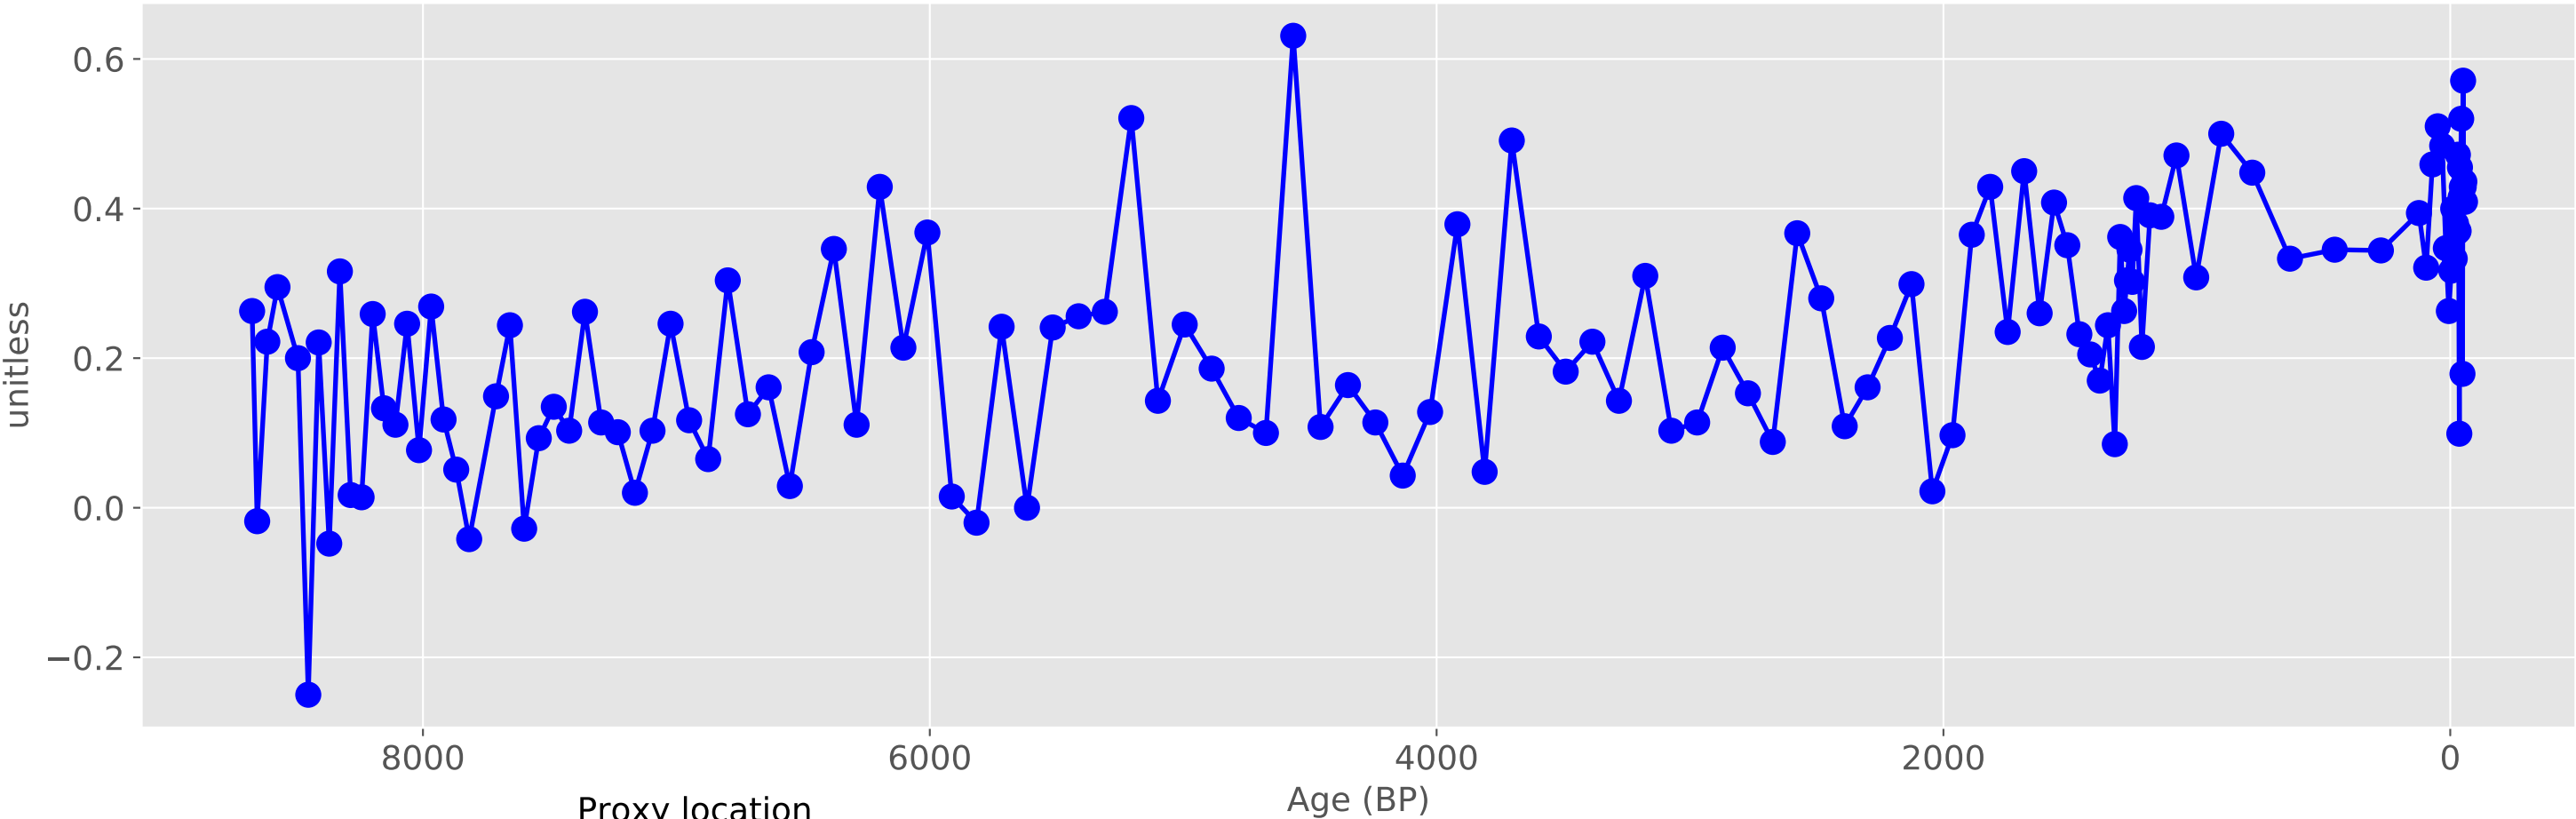

Proxy location  
(37.67 ° N, 112.77 ° W)



|                    |                                                       |
|--------------------|-------------------------------------------------------|
| Dataset name:      | MorrisPond.Morris.2013                                |
| Archive type:      | LakeSediment                                          |
| Proxy type:        | pollen                                                |
| Variable name:     | ArtChenoSar                                           |
| Latitude ( ° N):   | 37.6744                                               |
| Longitude ( ° E):  | -112.7747                                             |
| Elevation (m):     | 3126.0                                                |
| Interp. variable:  | P-E                                                   |
| Interp. detail:    | @surface                                              |
| Interp. season:    | summerOnly                                            |
| Interp. direction: | positive                                              |
| Pub. 1 title:      | Using fire regimes to delineate zones in a high-re... |
| Pub. 1 authors:    | Morris, Jesse L.;Brunelle, Andrea;DeRose, R. Justi... |
| Pub. 1 year:       | 2013                                                  |
| Pub. 1 DOI:        | 10.1016/j.yqres.2012.10.002                           |
| Original data URL: | wNA                                                   |

Proxy data and metadata  
LakeSediment | pollen | CascadeFen.Maher.1963 | M2L7bd99tq6P

Proxy time series: precipitation

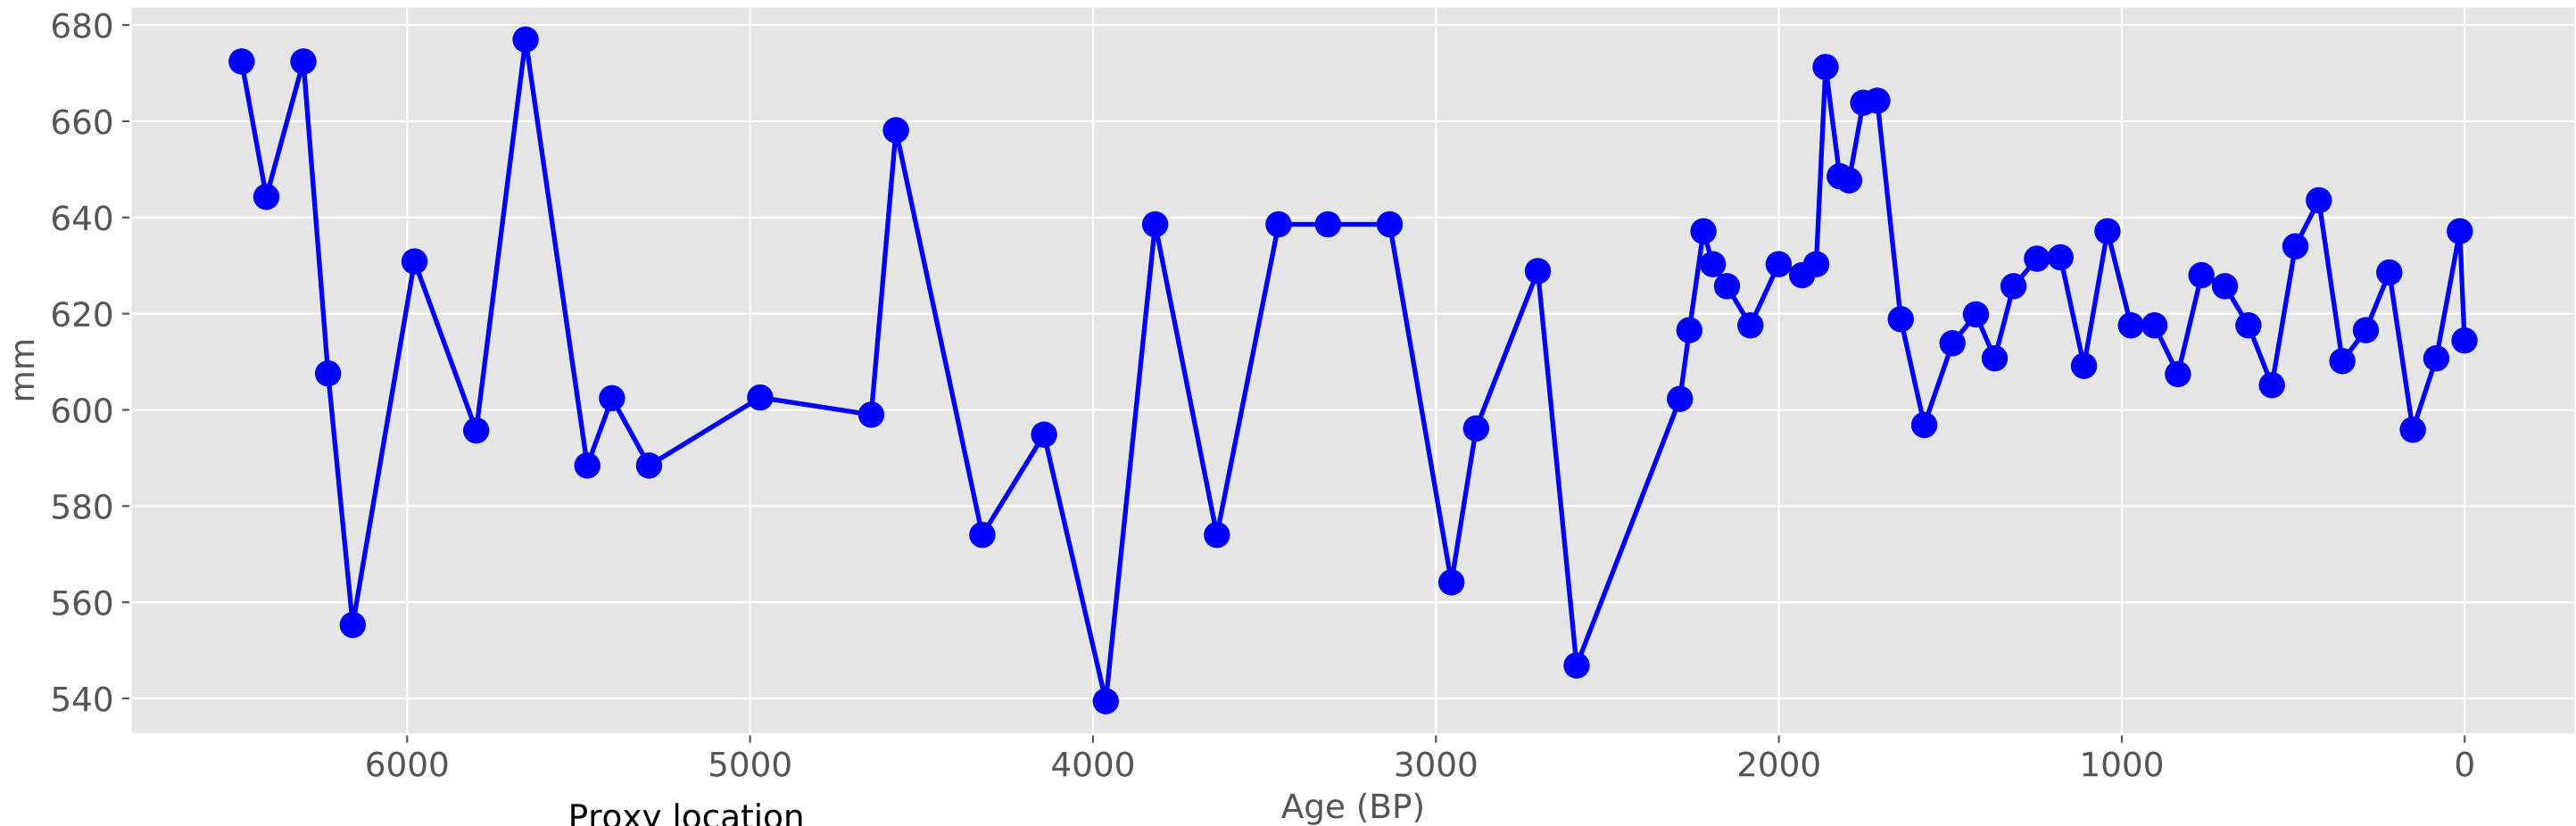

Proxy location  
(37.65 ° N, 107.81 ° W)

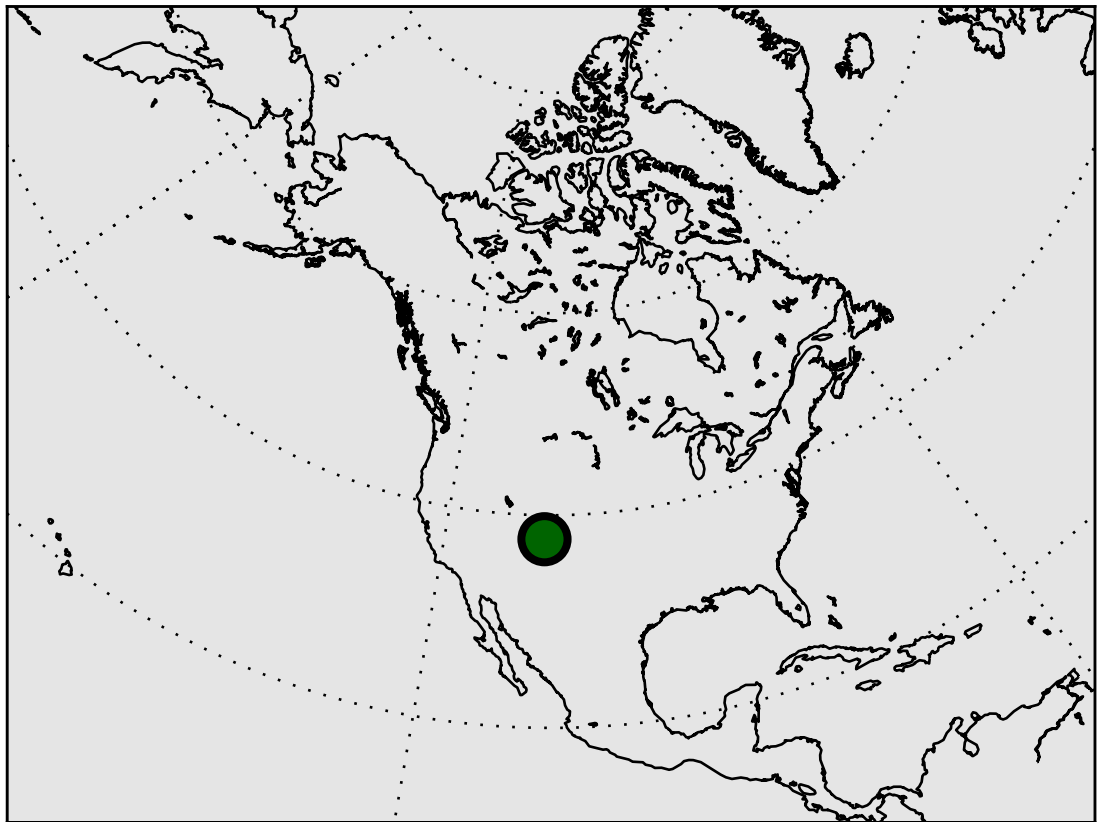

|                    |                                                       |
|--------------------|-------------------------------------------------------|
| Dataset name:      | CascadeFen.Maher.1963                                 |
| Archive type:      | LakeSediment                                          |
| Proxy type:        | pollen                                                |
| Variable name:     | precipitation                                         |
| Latitude ( ° N):   | 37.65                                                 |
| Longitude ( ° E):  | -107.81                                               |
| Elevation (m):     | 2690.0                                                |
| Interp. variable:  | P                                                     |
| Interp. detail:    | amount@surface                                        |
| Interp. season:    | annual                                                |
| Interp. direction: | positive                                              |
| Pub. 1 title:      | Pollen analyses of surface materials from the sout... |
| Pub. 1 authors:    | Maher, Louis J.                                       |
| Pub. 1 year:       | 1963                                                  |
| Pub. 1 DOI:        | 10.1130/0016-7606(1963)74[1485:PAOSMF]2.0.CO;2        |
| Original data URL: | www.ncdc.noaa.gov/paleo/study/27330                   |

Proxy data and metadata  
LakeSediment | pollen | CascadeFen.Maher.1963 | M2Lfgw3jhx9P

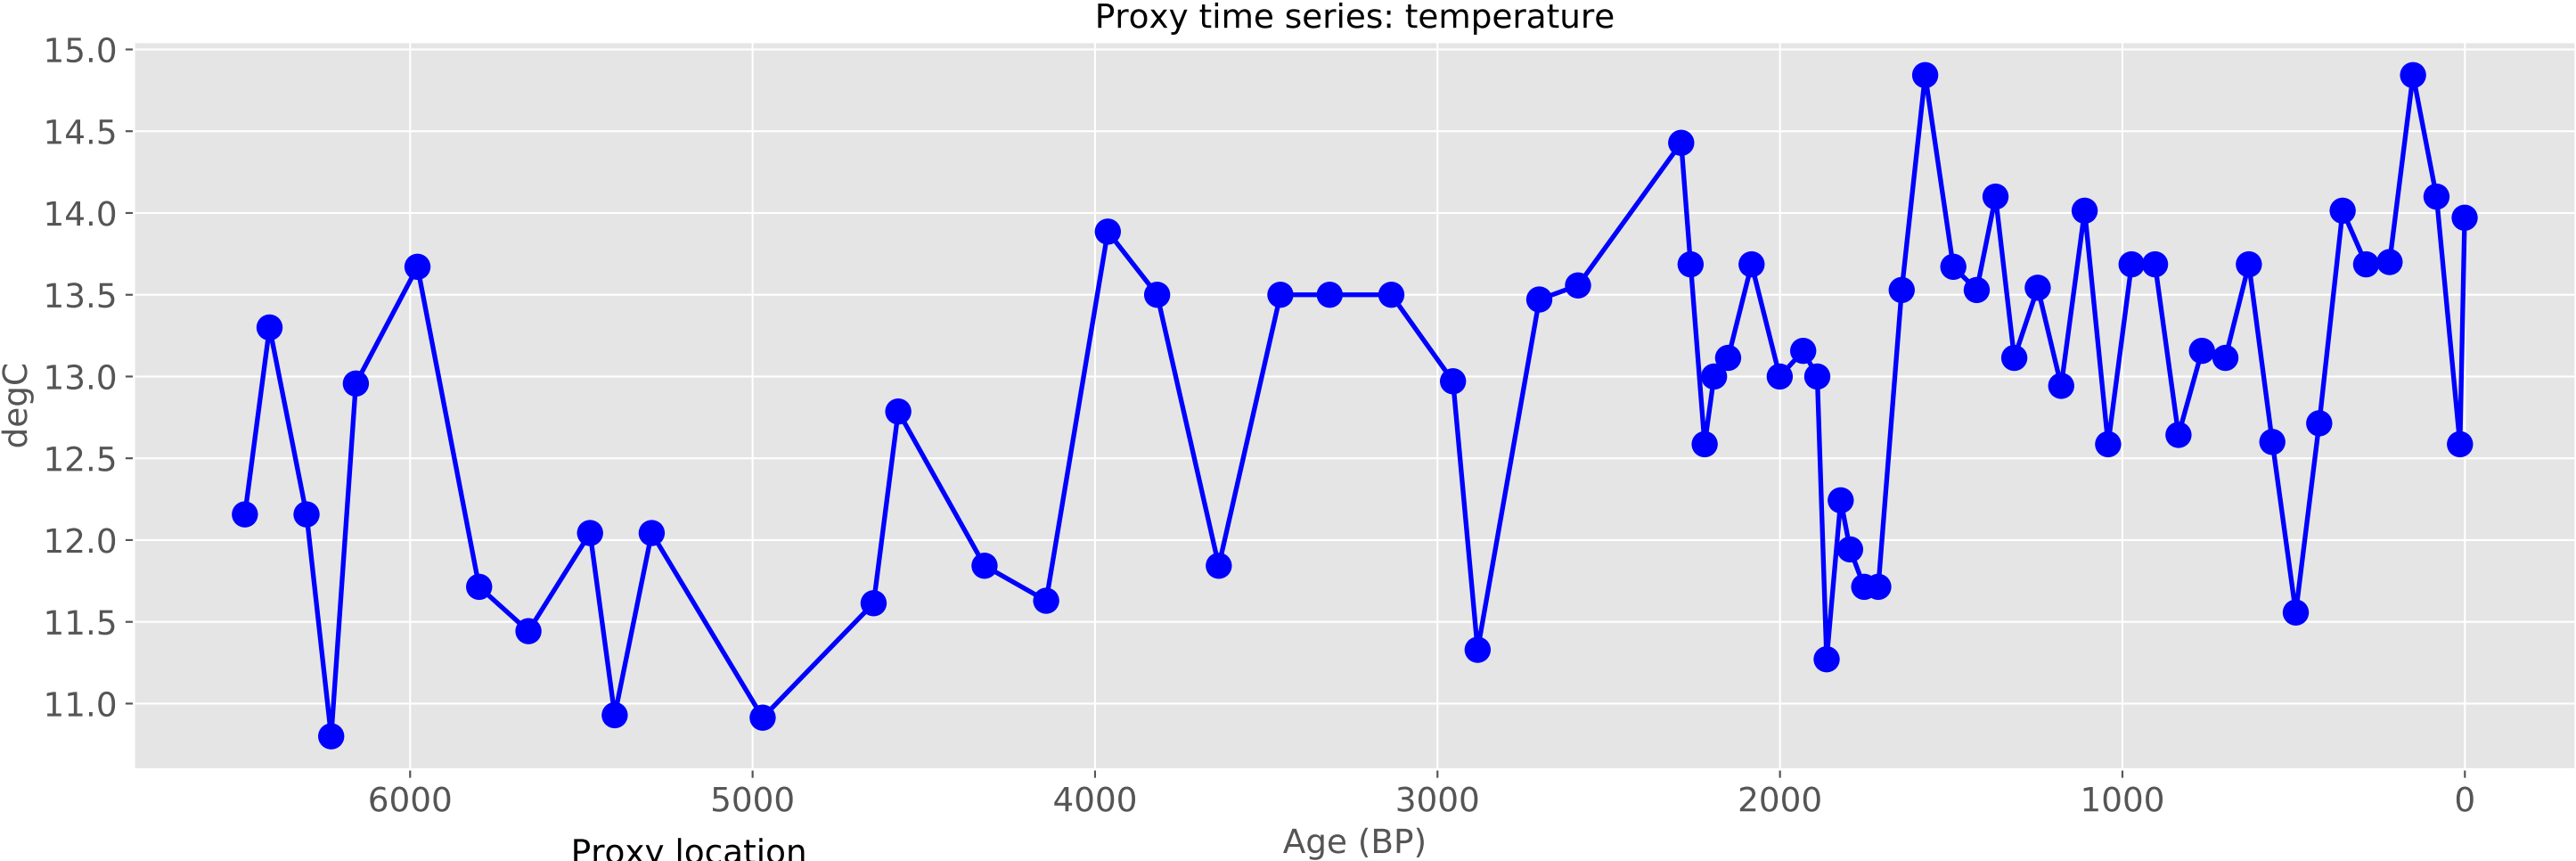

|                    |                                                       |
|--------------------|-------------------------------------------------------|
| Dataset name:      | CascadeFen.Maher.1963                                 |
| Archive type:      | LakeSediment                                          |
| Proxy type:        | pollen                                                |
| Variable name:     | temperature                                           |
| Latitude ( ° N):   | 37.65                                                 |
| Longitude ( ° E):  | -107.81                                               |
| Elevation (m):     | 2690.0                                                |
| Interp. variable:  | T                                                     |
| Interp. detail:    | air@surface                                           |
| Interp. season:    | summer+                                               |
| Interp. direction: | positive                                              |
| Pub. 1 title:      | Pollen analyses of surface materials from the sout... |
| Pub. 1 authors:    | Maher, Louis J.                                       |
| Pub. 1 year:       | 1963                                                  |
| Pub. 1 DOI:        | 10.1130/0016-7606(1963)74[1485:PAOSMF]2.0.CO;2        |
| Original data URL: | www.ncdc.noaa.gov/paleo/study/27330                   |



Proxy data and metadata  
LakeSediment | pollen | CascadeFen.Maher.1963 | M2Lgnn5959oP

Proxy time series: temperature

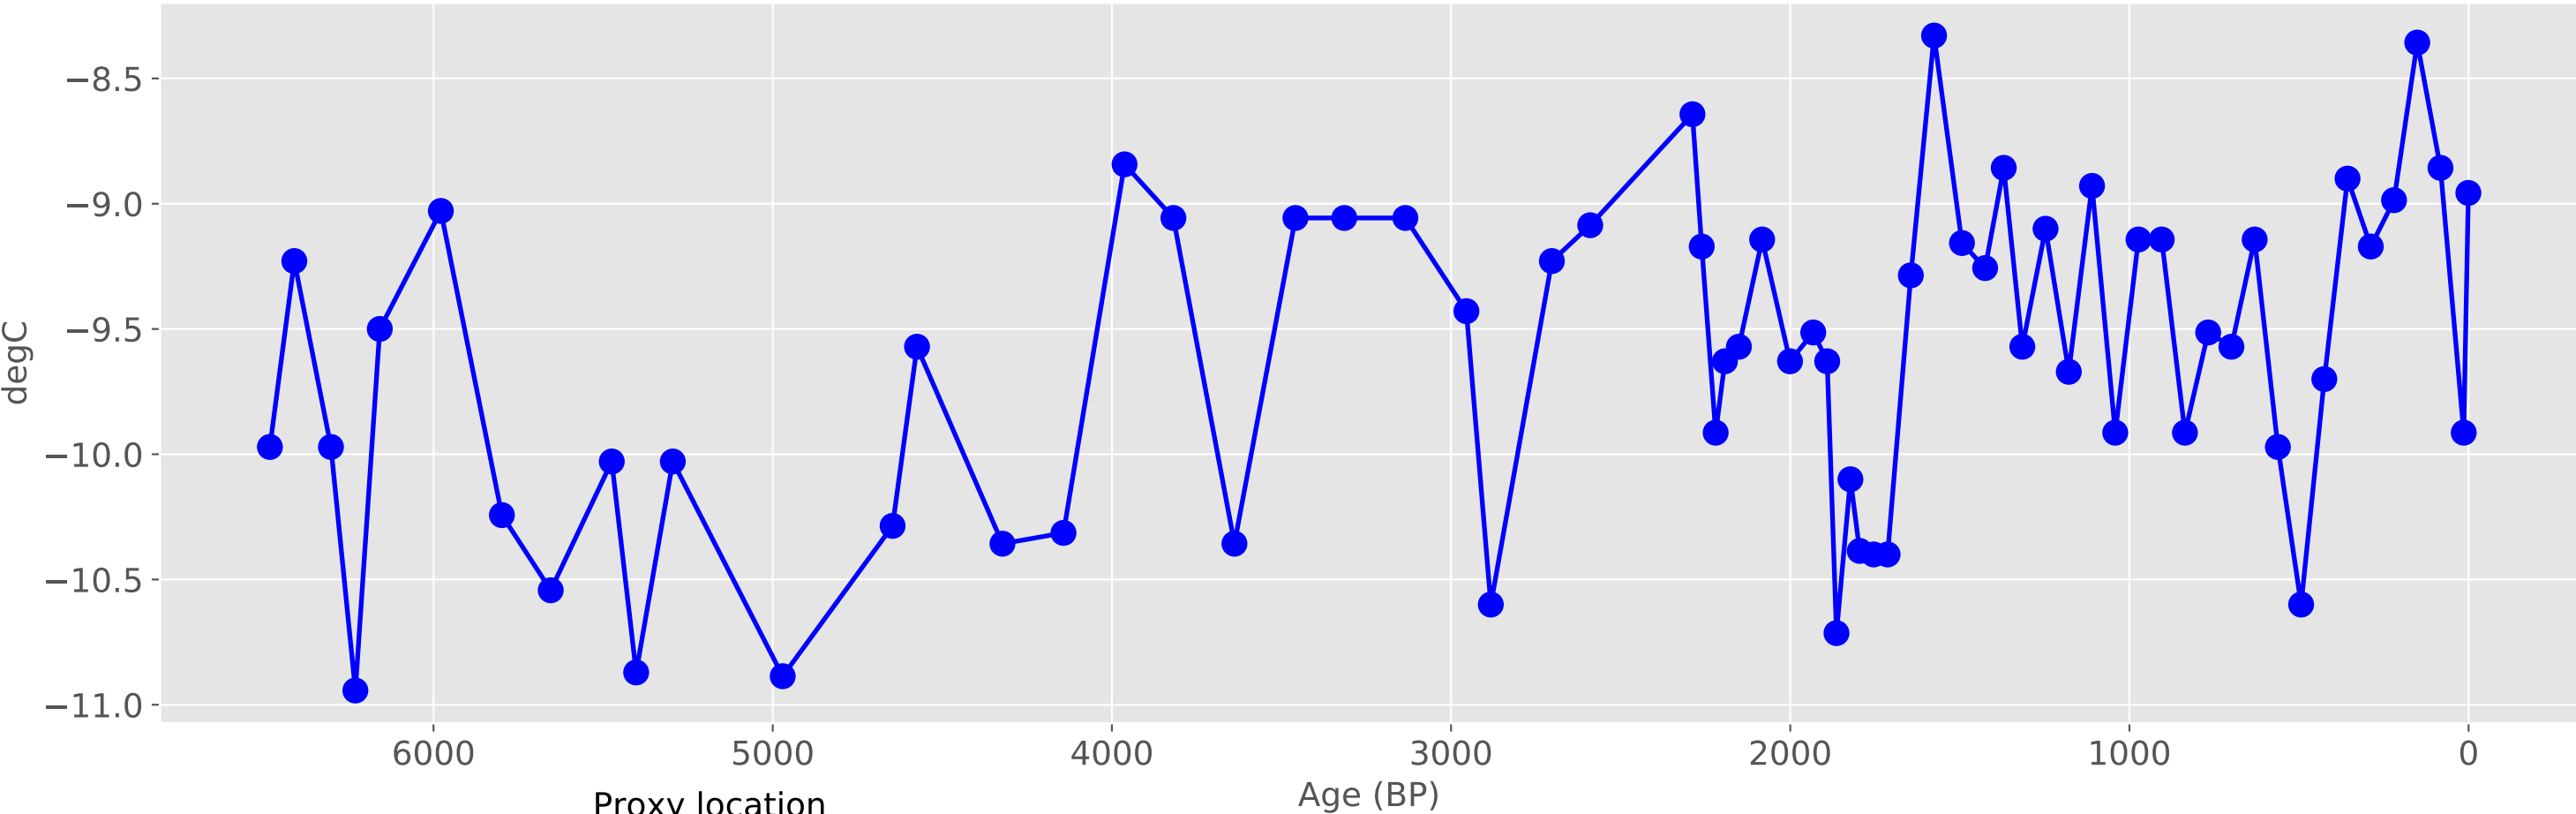

Proxy location  
(37.65 ° N, 107.81 ° W)



|                    |                                                       |
|--------------------|-------------------------------------------------------|
| Dataset name:      | CascadeFen.Maher.1963                                 |
| Archive type:      | LakeSediment                                          |
| Proxy type:        | pollen                                                |
| Variable name:     | temperature                                           |
| Latitude ( ° N):   | 37.65                                                 |
| Longitude ( ° E):  | -107.81                                               |
| Elevation (m):     | 2690.0                                                |
| Interp. variable:  | T                                                     |
| Interp. detail:    | air@surface                                           |
| Interp. season:    | winter+                                               |
| Interp. direction: | positive                                              |
| Pub. 1 title:      | Pollen analyses of surface materials from the sout... |
| Pub. 1 authors:    | Maher, Louis J.                                       |
| Pub. 1 year:       | 1963                                                  |
| Pub. 1 DOI:        | 10.1130/0016-7606(1963)74[1485:PAOSMF]2.0.CO;2        |
| Original data URL: | www.ncdc.noaa.gov/paleo/study/27330                   |

Proxy data and metadata  
LakeSediment | pollen | CascadeFen.Maher.1963 | M2Lvhsqfd0bP

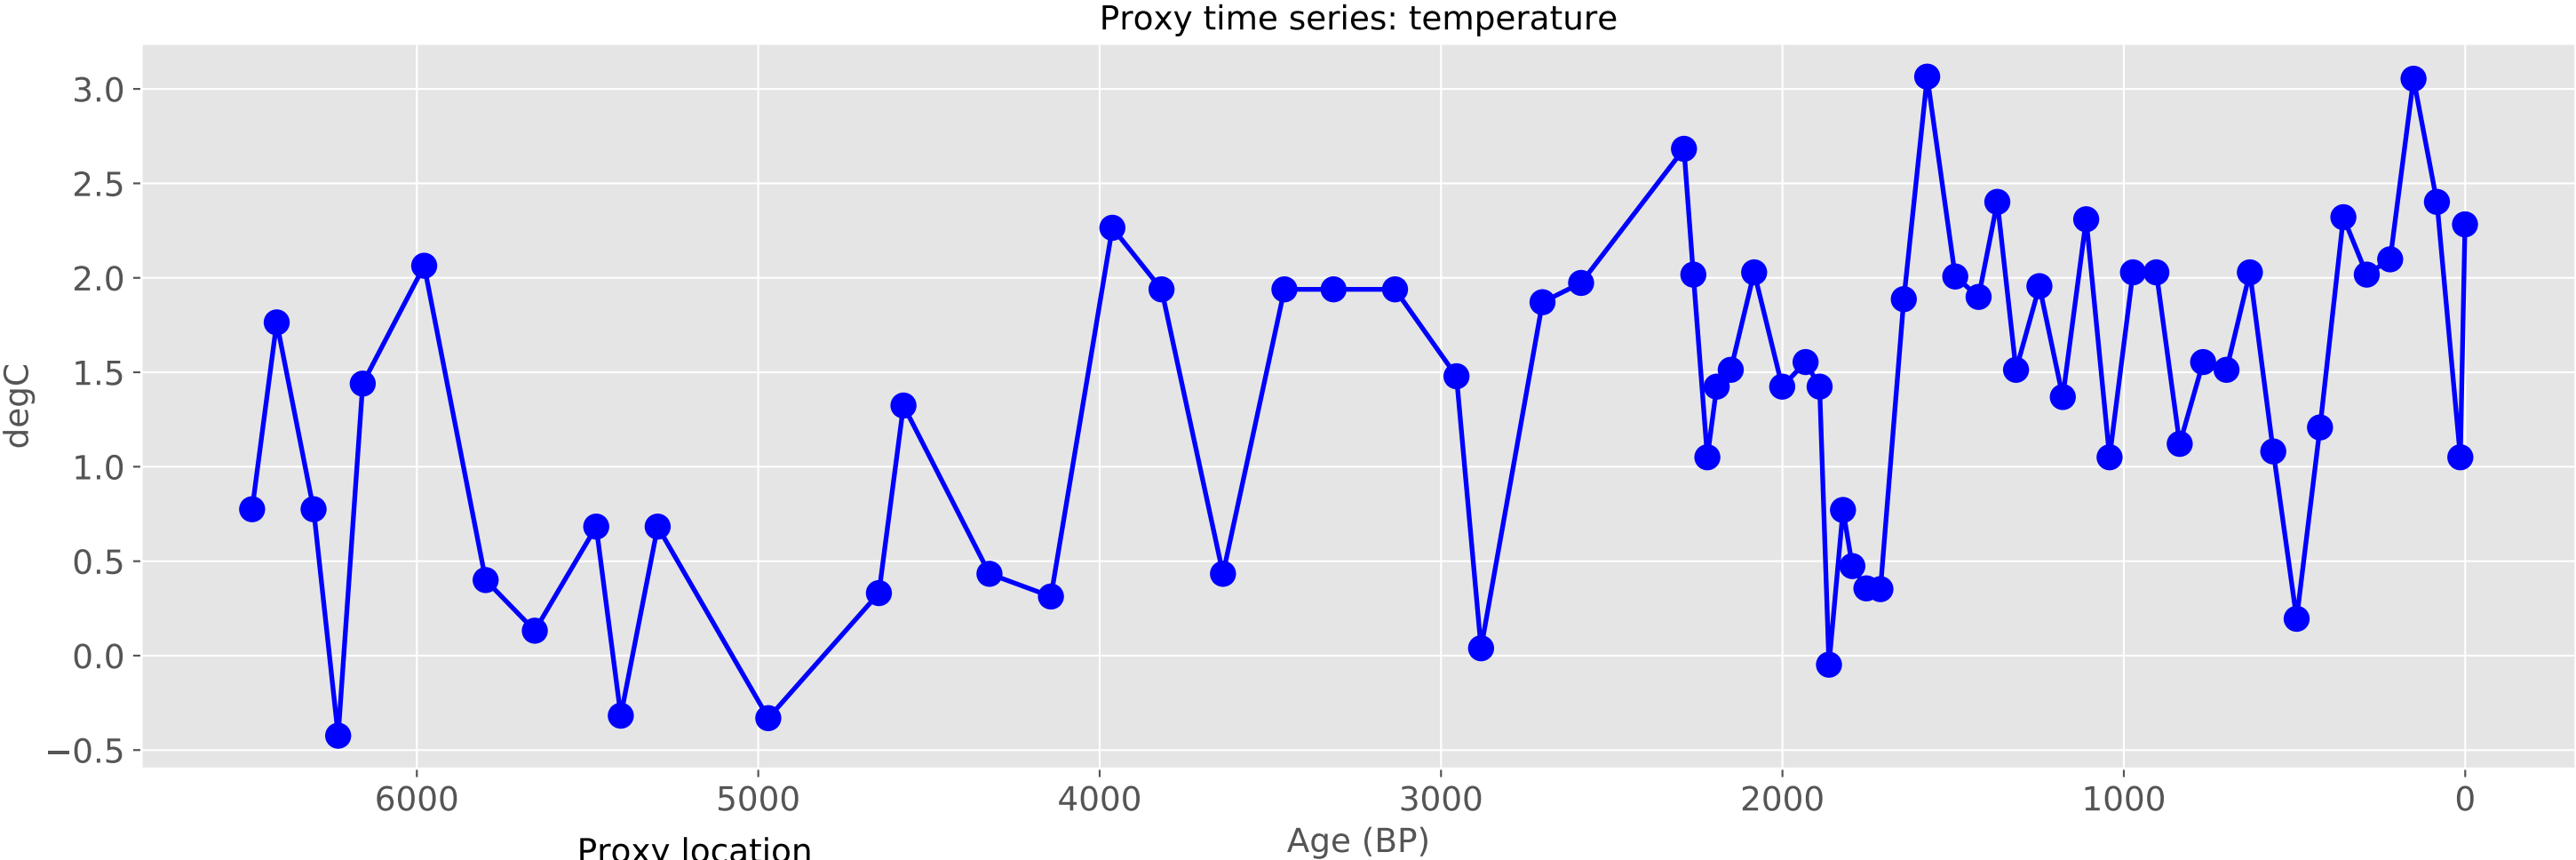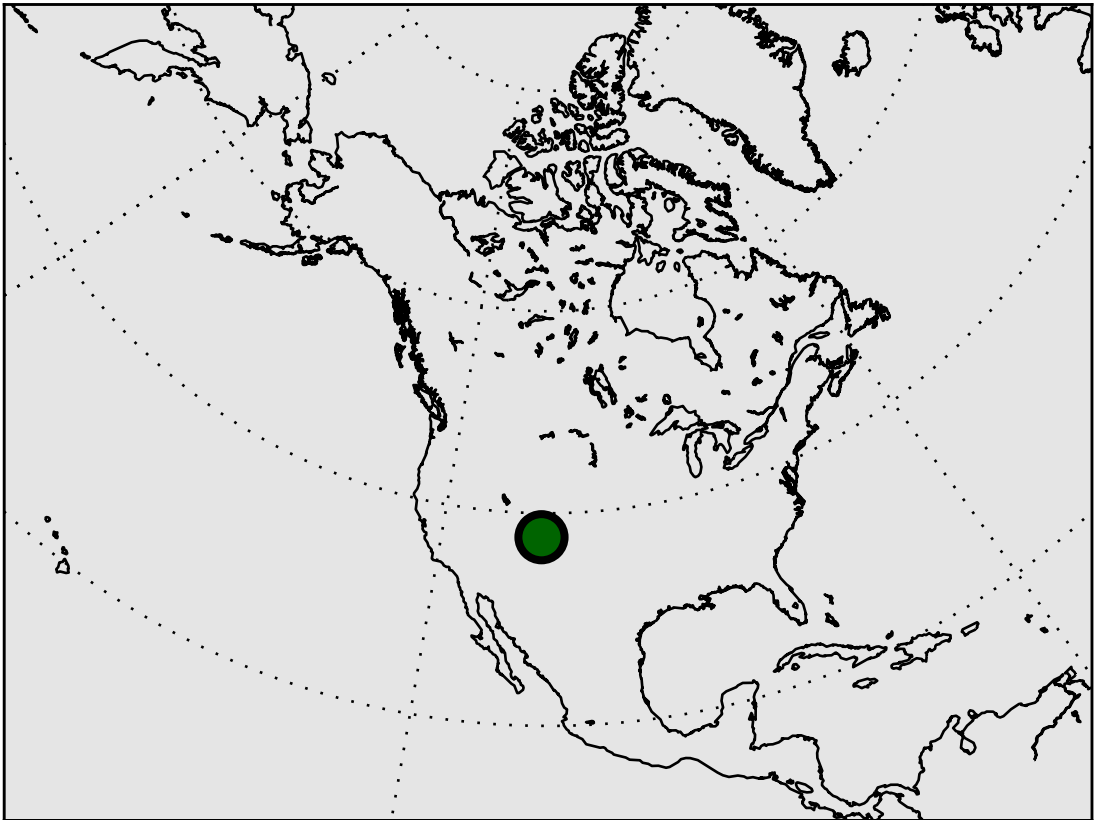

|                    |                                                       |
|--------------------|-------------------------------------------------------|
| Dataset name:      | CascadeFen.Maher.1963                                 |
| Archive type:      | LakeSediment                                          |
| Proxy type:        | pollen                                                |
| Variable name:     | temperature                                           |
| Latitude ( ° N):   | 37.65                                                 |
| Longitude ( ° E):  | -107.81                                               |
| Elevation (m):     | 2690.0                                                |
| Interp. variable:  | T                                                     |
| Interp. detail:    | air@surface                                           |
| Interp. season:    | annual                                                |
| Interp. direction: | positive                                              |
| Pub. 1 title:      | Pollen analyses of surface materials from the sout... |
| Pub. 1 authors:    | Maher, Louis J.                                       |
| Pub. 1 year:       | 1963                                                  |
| Pub. 1 DOI:        | 10.1130/0016-7606(1963)74[1485:PAOSMF]2.0.CO;2        |
| Original data URL: | www.ncdc.noaa.gov/paleo/study/27330                   |

Proxy data and metadata  
LakeSediment | pollen | HuntersLake.Anderson.2008 | WEB0319dfb2

Proxy time series: Picea/Pinus

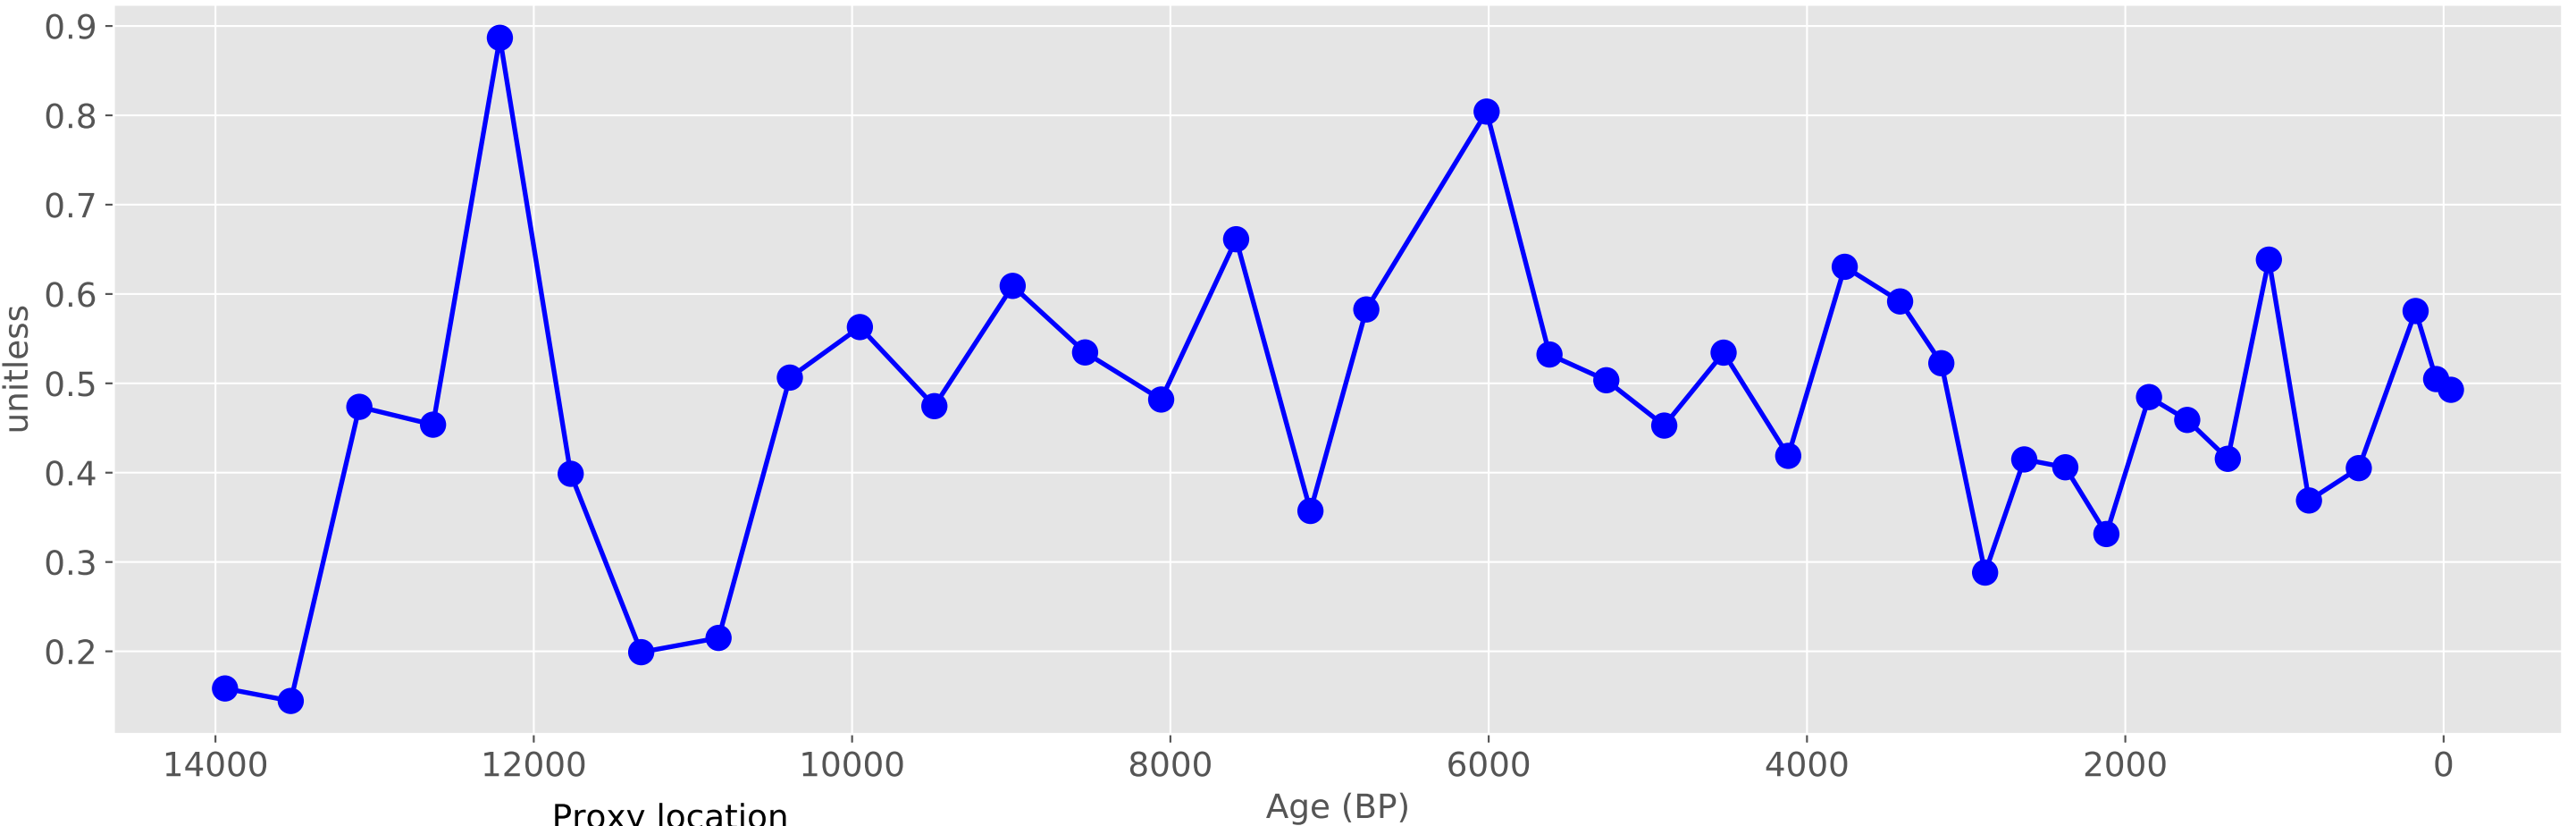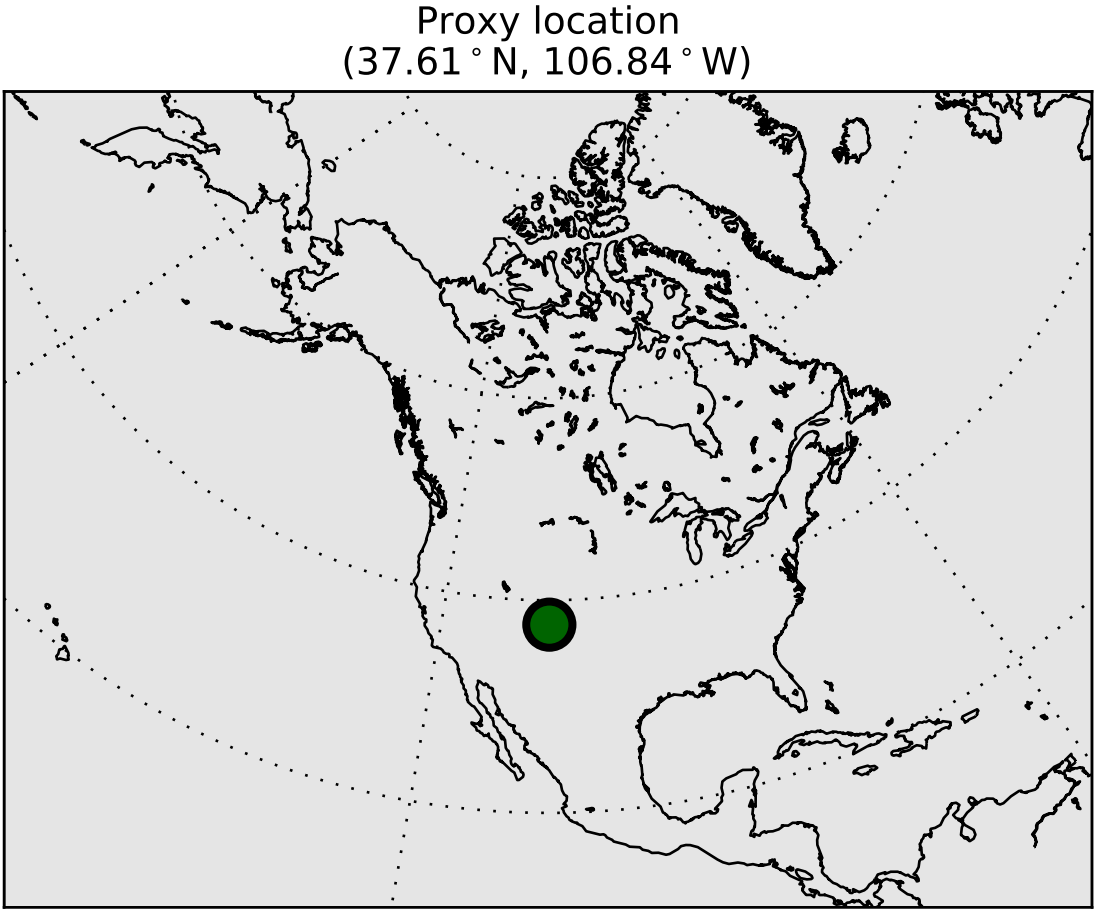

|                    |                                                       |
|--------------------|-------------------------------------------------------|
| Dataset name:      | HuntersLake.Anderson.2008                             |
| Archive type:      | LakeSediment                                          |
| Proxy type:        | pollen                                                |
| Variable name:     | Picea/Pinus                                           |
| Latitude ( ° N):   | 37.611                                                |
| Longitude ( ° E):  | -106.8435                                             |
| Elevation (m):     | 3476.0                                                |
| Interp. variable:  | T                                                     |
| Interp. detail:    | air@surface                                           |
| Interp. season:    | annual                                                |
| Interp. direction: | positive                                              |
| Pub. 1 title:      | Holocene vegetation and fire regimes in subalpine ... |
| Pub. 1 authors:    | Anderson, R. S.;Allen, C. D.;Toney, J. L.;Jass, R.... |
| Pub. 1 year:       | 2008                                                  |
| Pub. 1 DOI:        | 10.1071/WF07028                                       |
| Original data URL: | wNAm                                                  |

Proxy data and metadata  
LakeSediment | pollen | HuntersLake.Anderson.2008 | WEB7378e2a5

Proxy time series: Pinus/Artemisia

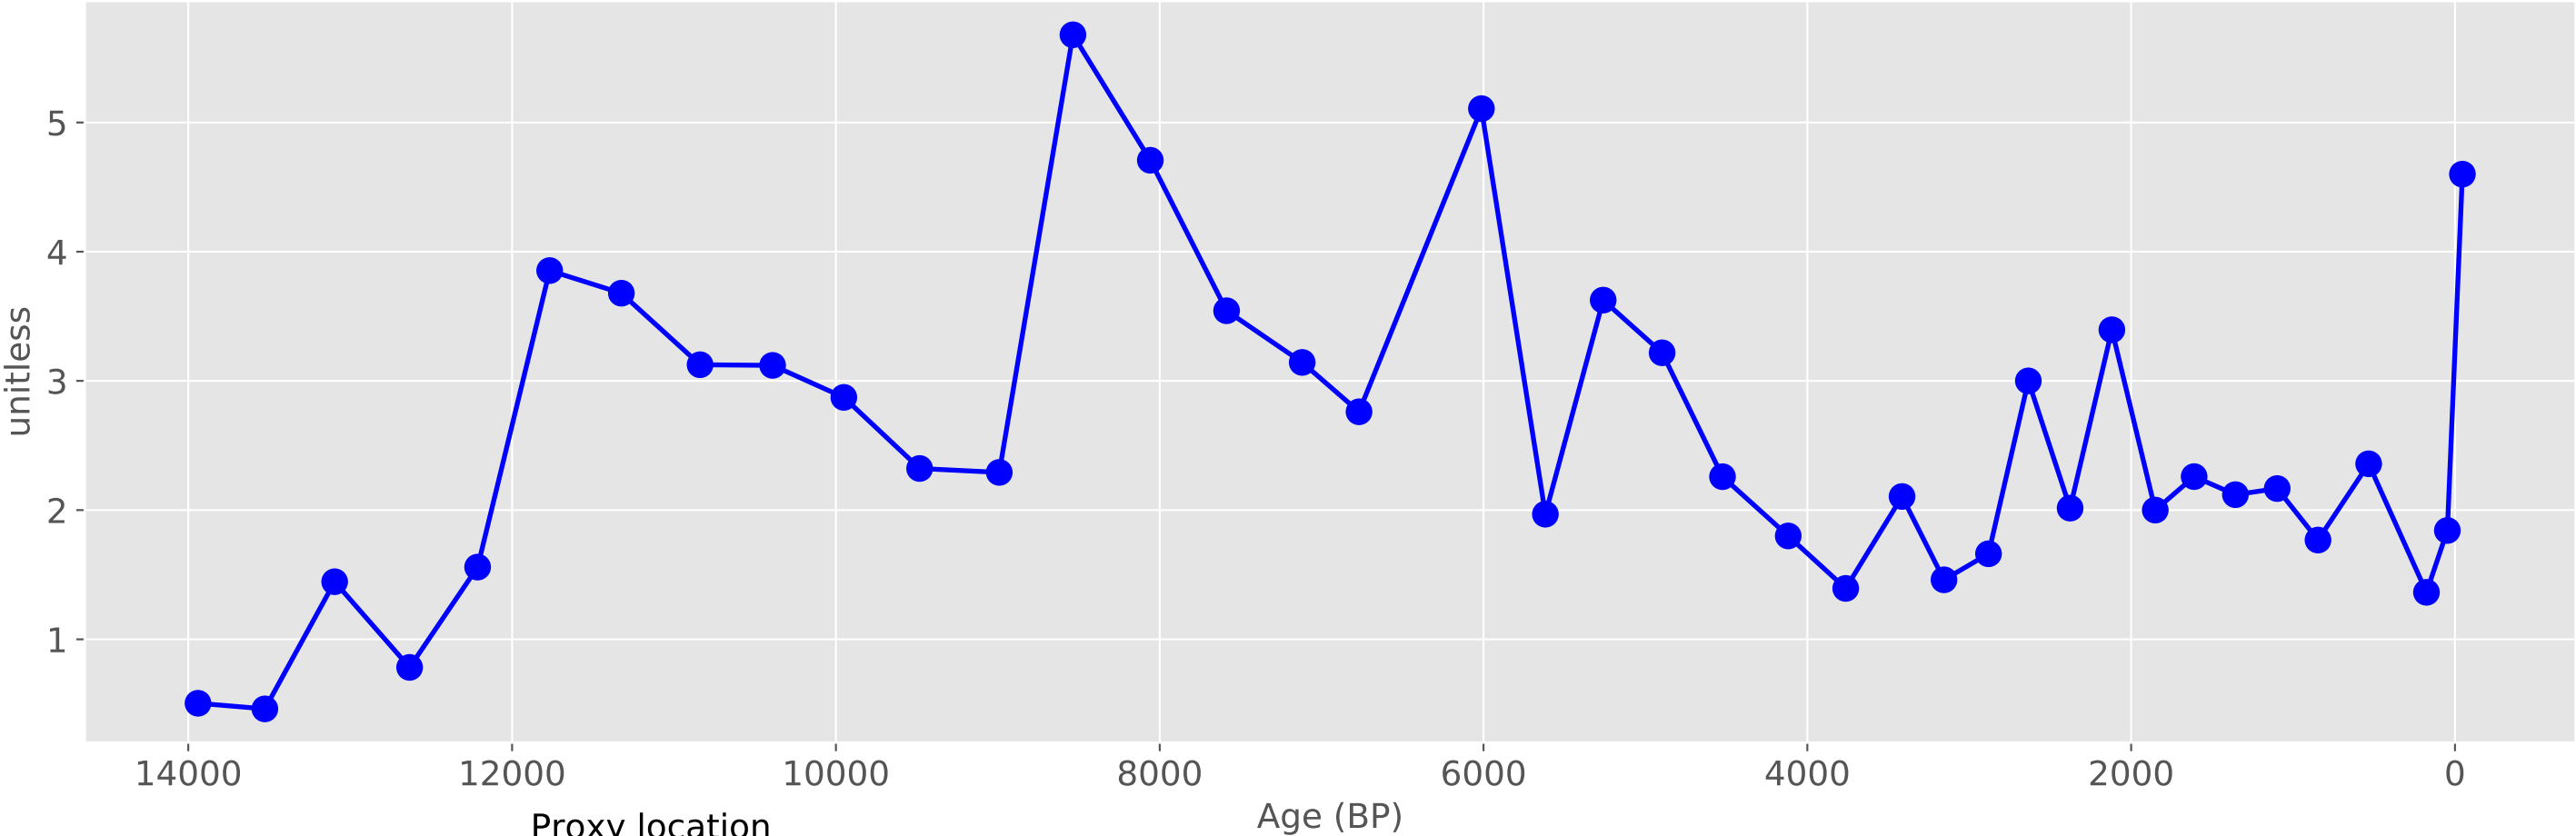

Proxy location  
(37.61 ° N, 106.84 ° W)

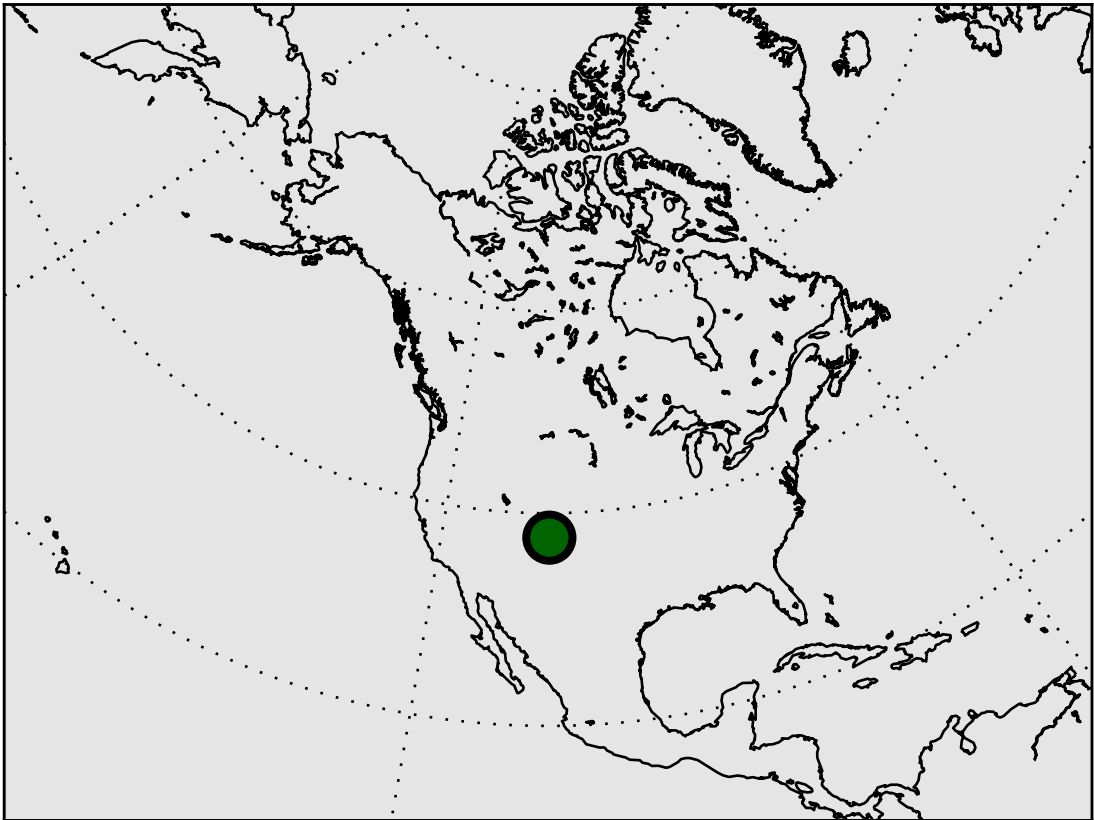

|                    |                                                       |
|--------------------|-------------------------------------------------------|
| Dataset name:      | HuntersLake.Anderson.2008                             |
| Archive type:      | LakeSediment                                          |
| Proxy type:        | pollen                                                |
| Variable name:     | Pinus/Artemisia                                       |
| Latitude ( ° N):   | 37.611                                                |
| Longitude ( ° E):  | -106.8435                                             |
| Elevation (m):     | 3476.0                                                |
| Interp. variable:  | T                                                     |
| Interp. detail:    | air@surface                                           |
| Interp. season:    | annual                                                |
| Interp. direction: | positive                                              |
| Pub. 1 title:      | Holocene vegetation and fire regimes in subalpine ... |
| Pub. 1 authors:    | Anderson, R. S.;Allen, C. D.;Toney, J. L.;Jass, R.... |
| Pub. 1 year:       | 2008                                                  |
| Pub. 1 DOI:        | 10.1071/WF07028                                       |
| Original data URL: | wNA                                                   |

Proxy data and metadata  
LakeSediment | pollen | HuntersLake.Anderson.2008 | WEBd0ad6731

Proxy time series: Picea/Artemisia

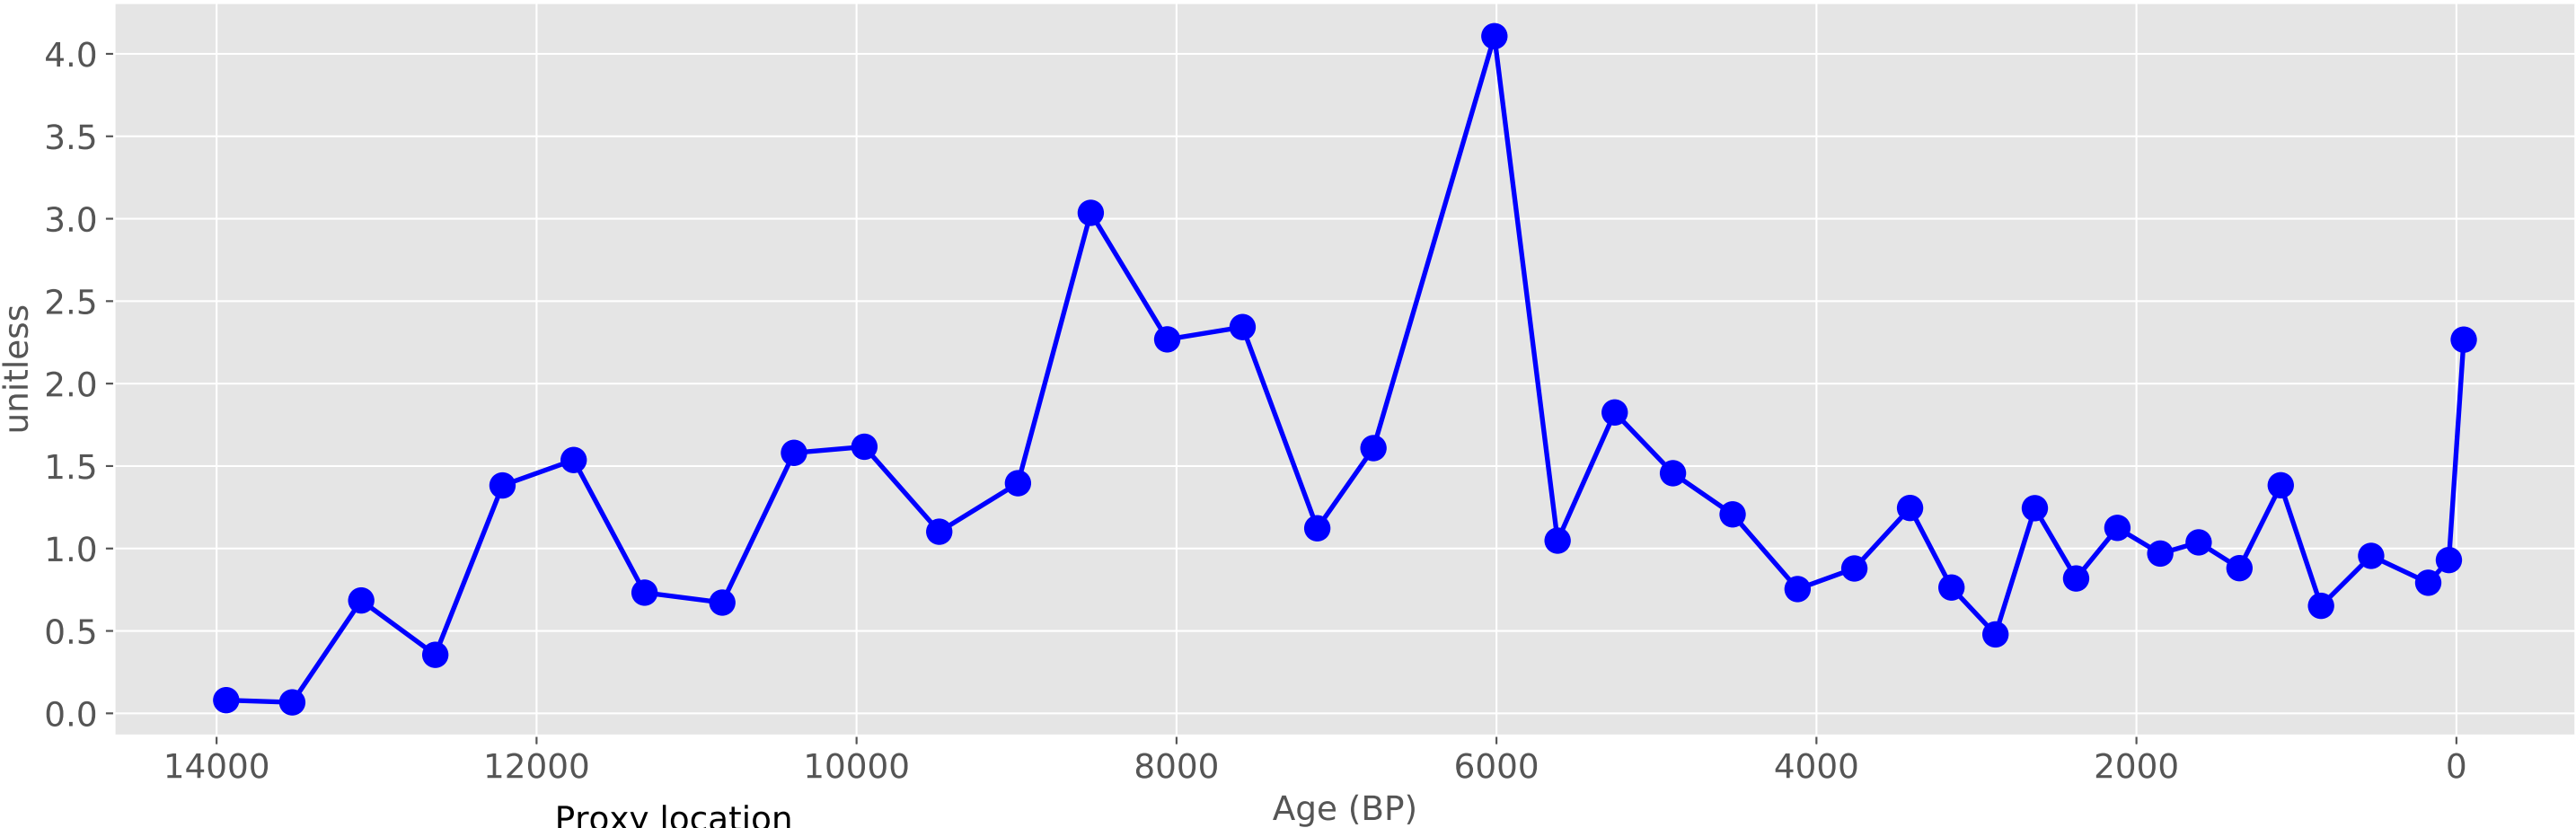

Proxy location  
(37.61 ° N, 106.84 ° W)



|                    |                                                       |
|--------------------|-------------------------------------------------------|
| Dataset name:      | HuntersLake.Anderson.2008                             |
| Archive type:      | LakeSediment                                          |
| Proxy type:        | pollen                                                |
| Variable name:     | Picea/Artemisia                                       |
| Latitude ( ° N):   | 37.611                                                |
| Longitude ( ° E):  | -106.8435                                             |
| Elevation (m):     | 3476.0                                                |
| Interp. variable:  | T                                                     |
| Interp. detail:    | air@surface                                           |
| Interp. season:    | annual                                                |
| Interp. direction: | positive                                              |
| Pub. 1 title:      | Holocene vegetation and fire regimes in subalpine ... |
| Pub. 1 authors:    | Anderson, R. S.;Allen, C. D.;Toney, J. L.;Jass, R.... |
| Pub. 1 year:       | 2008                                                  |
| Pub. 1 DOI:        | 10.1071/WF07028                                       |
| Original data URL: | wNAm                                                  |

Proxy data and metadata

LakeSediment | pollen | BeefPasture.Petersen.1985 | M2Lgb6c2jm2P

Proxy time series: temperature

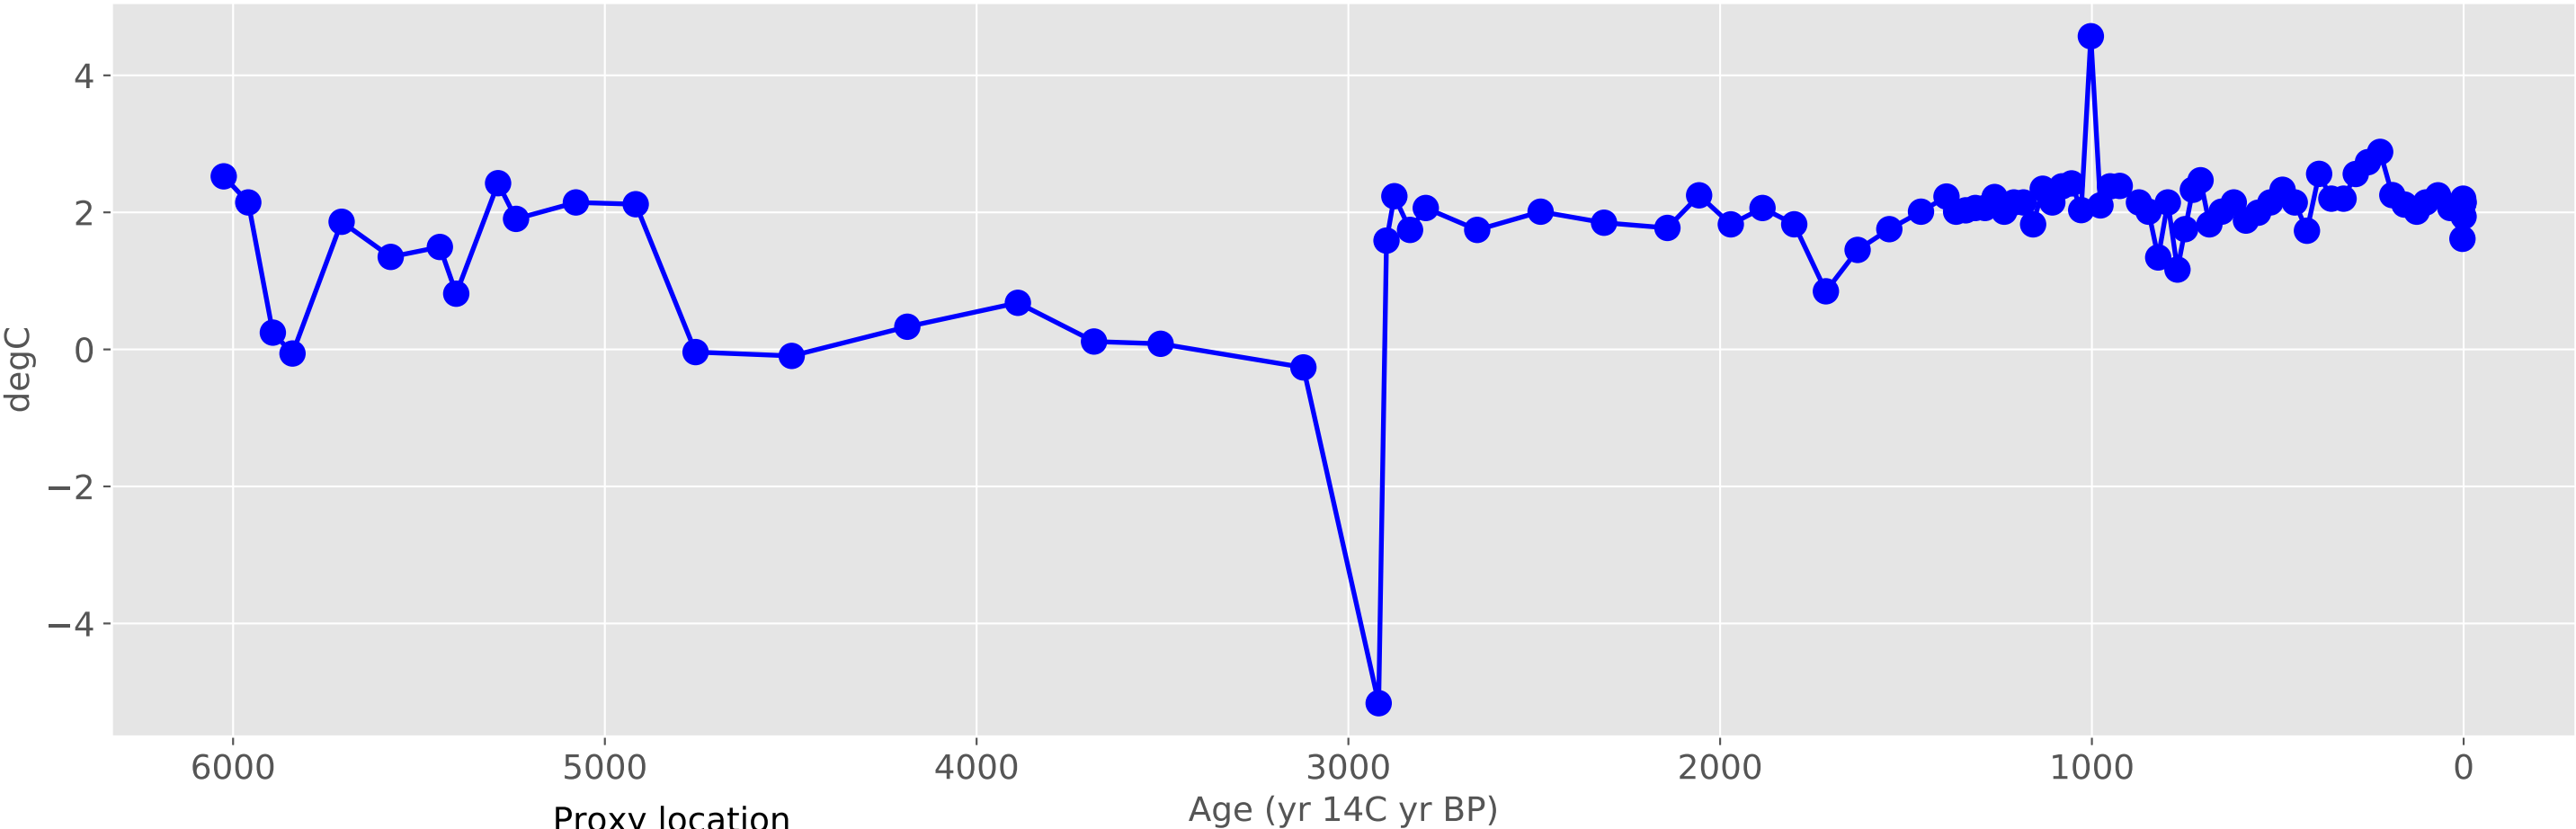

Proxy location  
(37.47 ° N, 108.16 ° W)

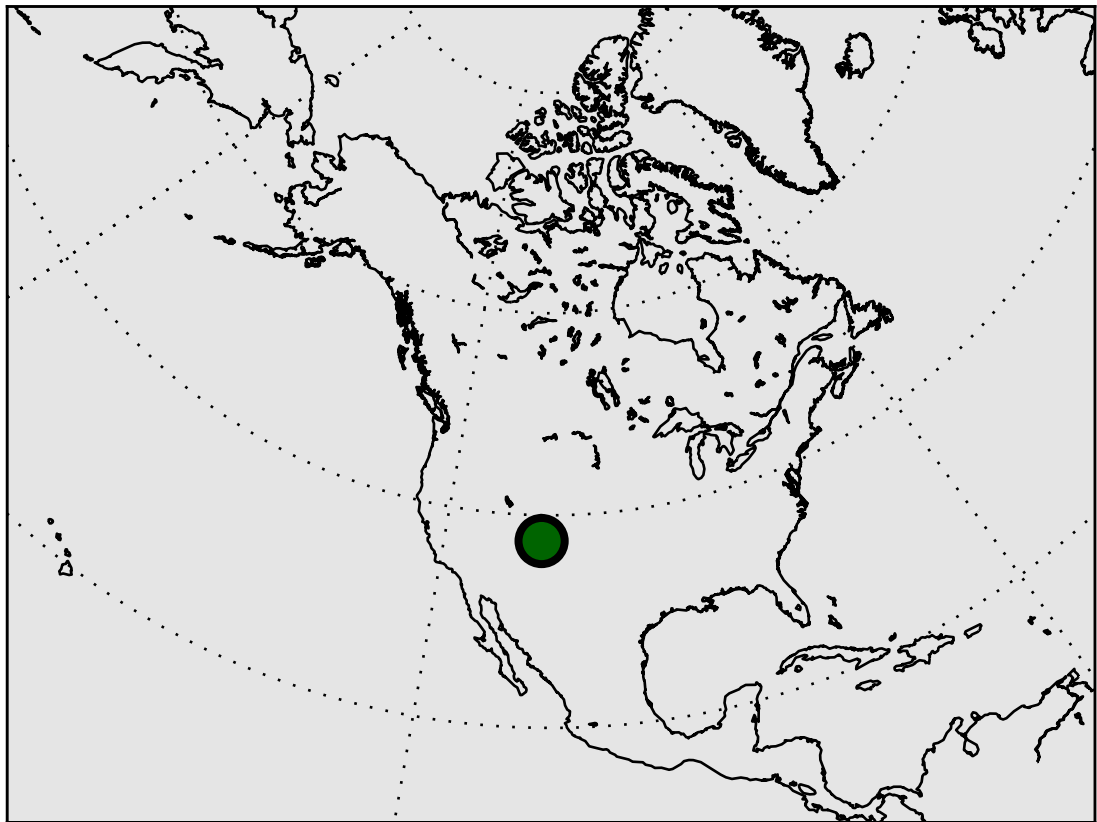

|                    |                                                                                              |
|--------------------|----------------------------------------------------------------------------------------------|
| Dataset name:      | BeefPasture.Petersen.1985                                                                    |
| Archive type:      | LakeSediment                                                                                 |
| Proxy type:        | pollen                                                                                       |
| Variable name:     | temperature                                                                                  |
| Latitude ( ° N):   | 37.47                                                                                        |
| Longitude ( ° E):  | -108.16                                                                                      |
| Elevation (m):     | 3060.0                                                                                       |
| Interp. variable:  | T                                                                                            |
| Interp. detail:    | air@surface                                                                                  |
| Interp. season:    | annual                                                                                       |
| Interp. direction: | positive                                                                                     |
| Pub. 1 title:      | Palynology in Montezuma County, southwestern Color...                                        |
| Pub. 1 authors:    | Petersen, K.L.                                                                               |
| Pub. 1 year:       | 1985                                                                                         |
| Pub. 1 DOI:        | Petersen, K. L. (1985). Palynology in Montezuma Co...                                        |
| Original data URL: | <a href="http://www.ncdc.noaa.gov/paleo/study/27330">www.ncdc.noaa.gov/paleo/study/27330</a> |



Proxy data and metadata

LakeSediment | pollen | BeefPasture.Petersen.1985 | M2Ljtr1o5yoP

Proxy time series: precipitation

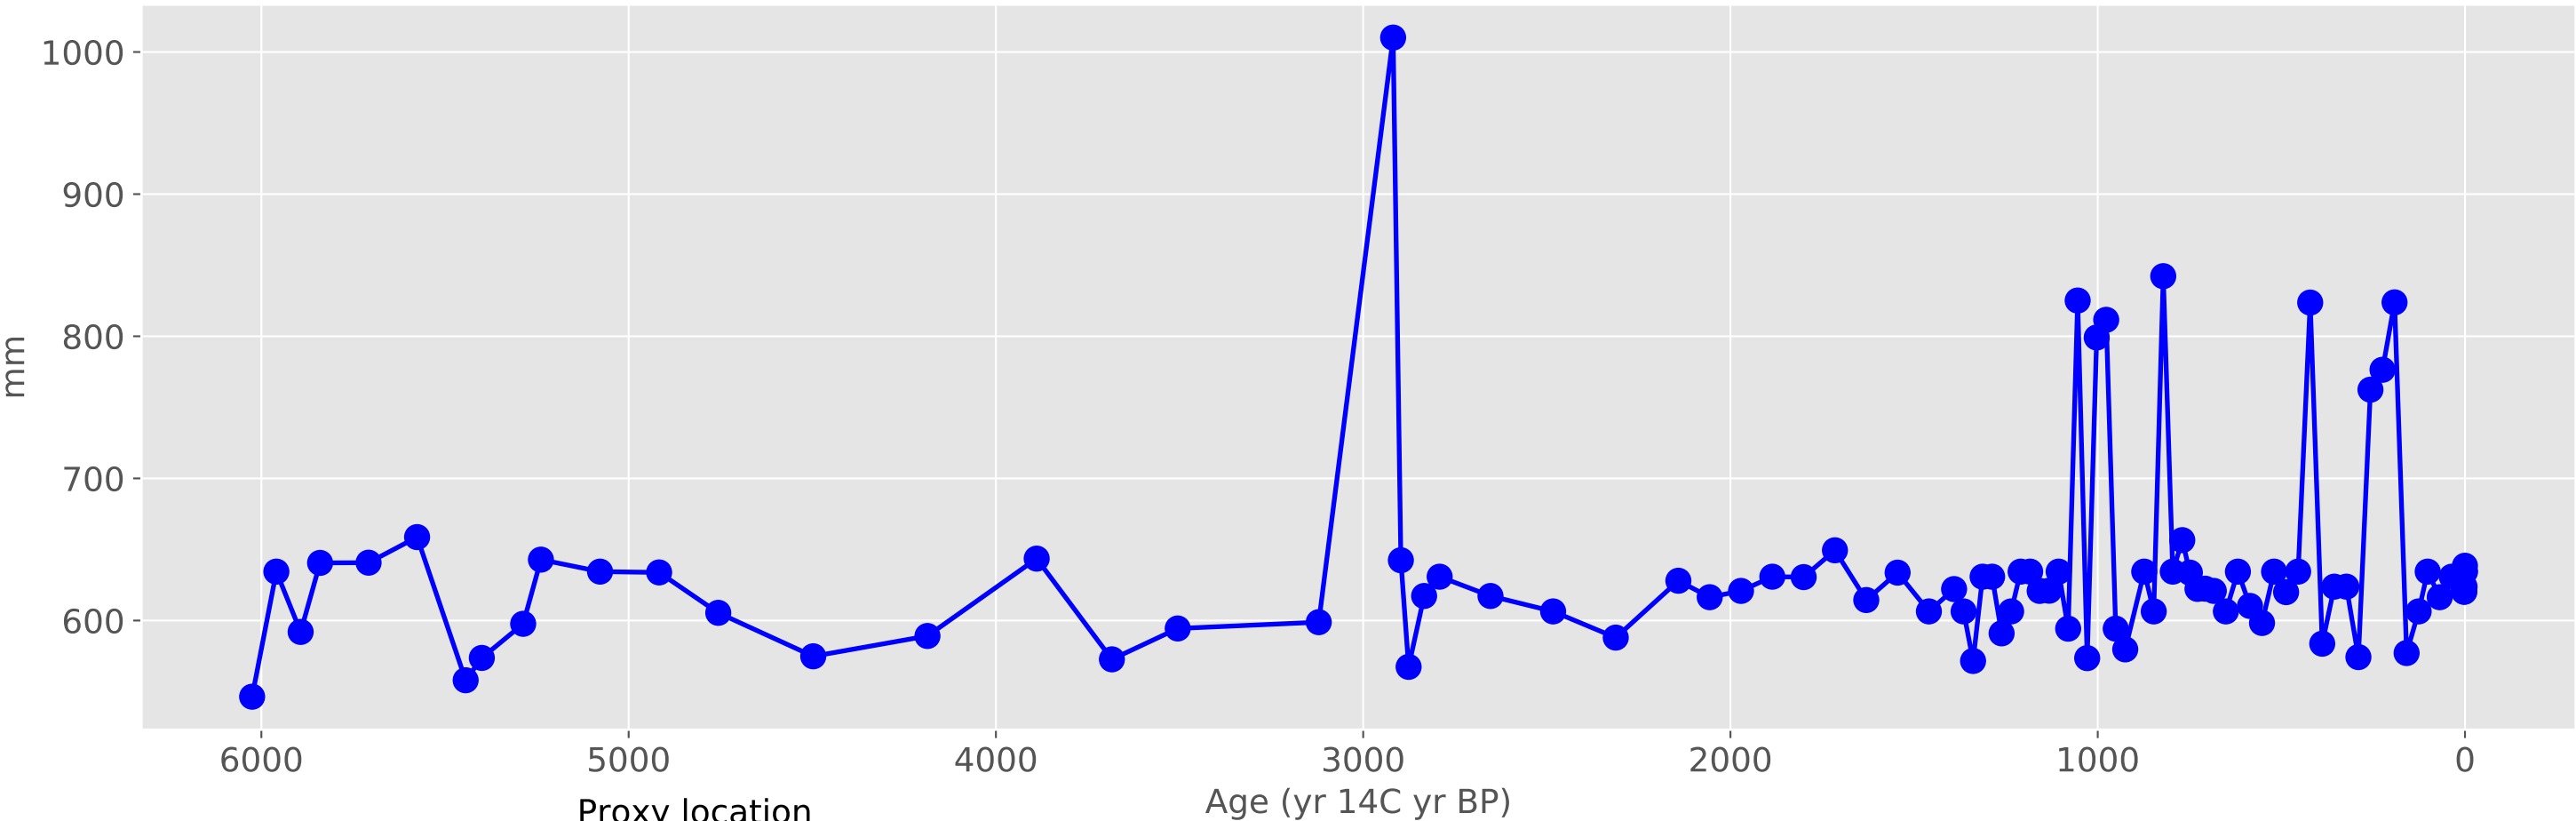

Proxy location  
(37.47 ° N, 108.16 ° W)



|                    |                                                                                              |
|--------------------|----------------------------------------------------------------------------------------------|
| Dataset name:      | BeefPasture.Petersen.1985                                                                    |
| Archive type:      | LakeSediment                                                                                 |
| Proxy type:        | pollen                                                                                       |
| Variable name:     | precipitation                                                                                |
| Latitude ( ° N):   | 37.47                                                                                        |
| Longitude ( ° E):  | -108.16                                                                                      |
| Elevation (m):     | 3060.0                                                                                       |
| Interp. variable:  | P                                                                                            |
| Interp. detail:    | amount@surface                                                                               |
| Interp. season:    | annual                                                                                       |
| Interp. direction: | positive                                                                                     |
| Pub. 1 title:      | Palynology in Montezuma County, southwestern Color...                                        |
| Pub. 1 authors:    | Petersen, K.L.                                                                               |
| Pub. 1 year:       | 1985                                                                                         |
| Pub. 1 DOI:        | Petersen, K. L. (1985). Palynology in Montezuma Co...                                        |
| Original data URL: | <a href="http://www.ncdc.noaa.gov/paleo/study/27330">www.ncdc.noaa.gov/paleo/study/27330</a> |

Proxy data and metadata

LakeSediment | pollen | BeefPasture.Petersen.1985 | M2Loyk9yzdgP

Proxy time series: temperature

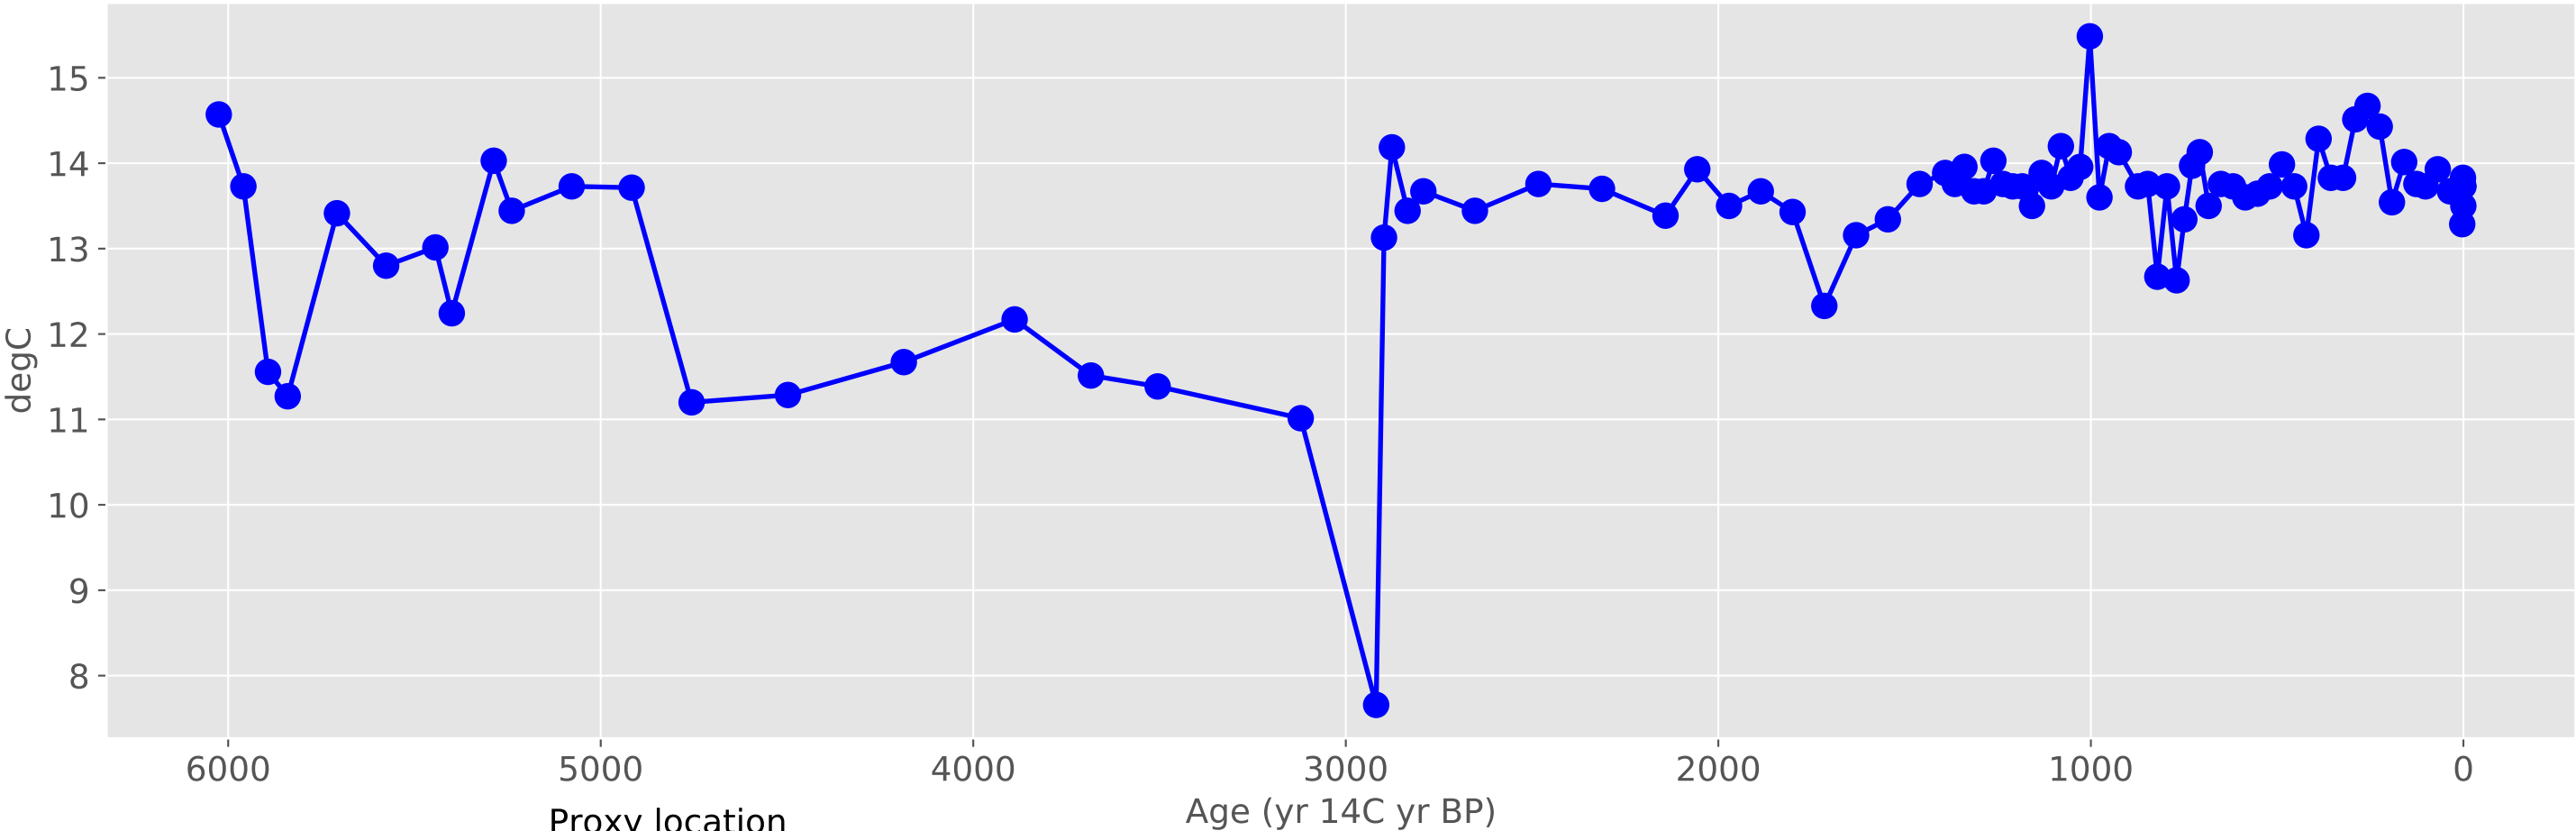

Proxy location  
(37.47 ° N, 108.16 ° W)



|                    |                                                                                              |
|--------------------|----------------------------------------------------------------------------------------------|
| Dataset name:      | BeefPasture.Petersen.1985                                                                    |
| Archive type:      | LakeSediment                                                                                 |
| Proxy type:        | pollen                                                                                       |
| Variable name:     | temperature                                                                                  |
| Latitude ( ° N):   | 37.47                                                                                        |
| Longitude ( ° E):  | -108.16                                                                                      |
| Elevation (m):     | 3060.0                                                                                       |
| Interp. variable:  | T                                                                                            |
| Interp. detail:    | air@surface                                                                                  |
| Interp. season:    | summer+                                                                                      |
| Interp. direction: | positive                                                                                     |
| Pub. 1 title:      | Palynology in Montezuma County, southwestern Color...                                        |
| Pub. 1 authors:    | Petersen, K.L.                                                                               |
| Pub. 1 year:       | 1985                                                                                         |
| Pub. 1 DOI:        | Petersen, K. L. (1985). Palynology in Montezuma Co...                                        |
| Original data URL: | <a href="http://www.ncdc.noaa.gov/paleo/study/27330">www.ncdc.noaa.gov/paleo/study/27330</a> |

Proxy data and metadata

LakeSediment | pollen | BeefPasture.Petersen.1985 | M2Lrb7axgd8P

Proxy time series: temperature

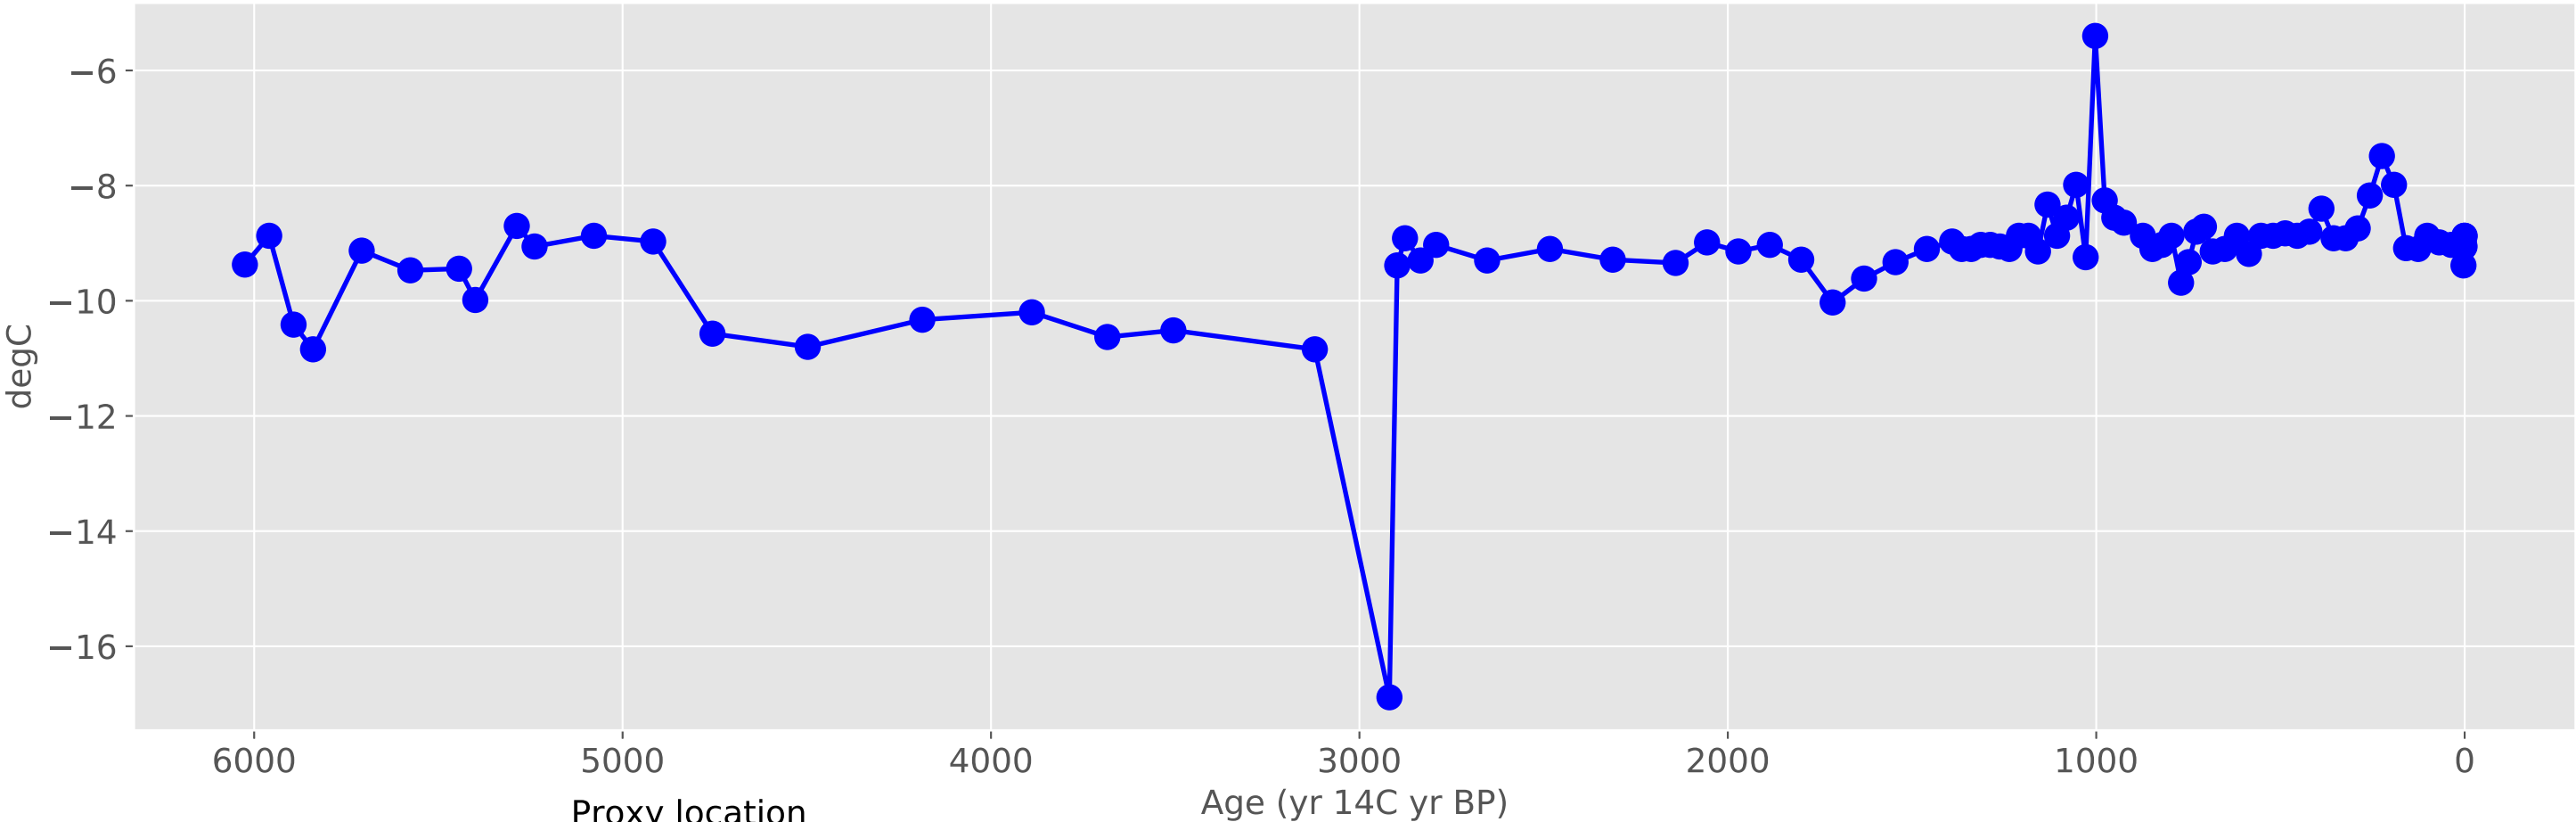

Proxy location  
(37.47 ° N, 108.16 ° W)

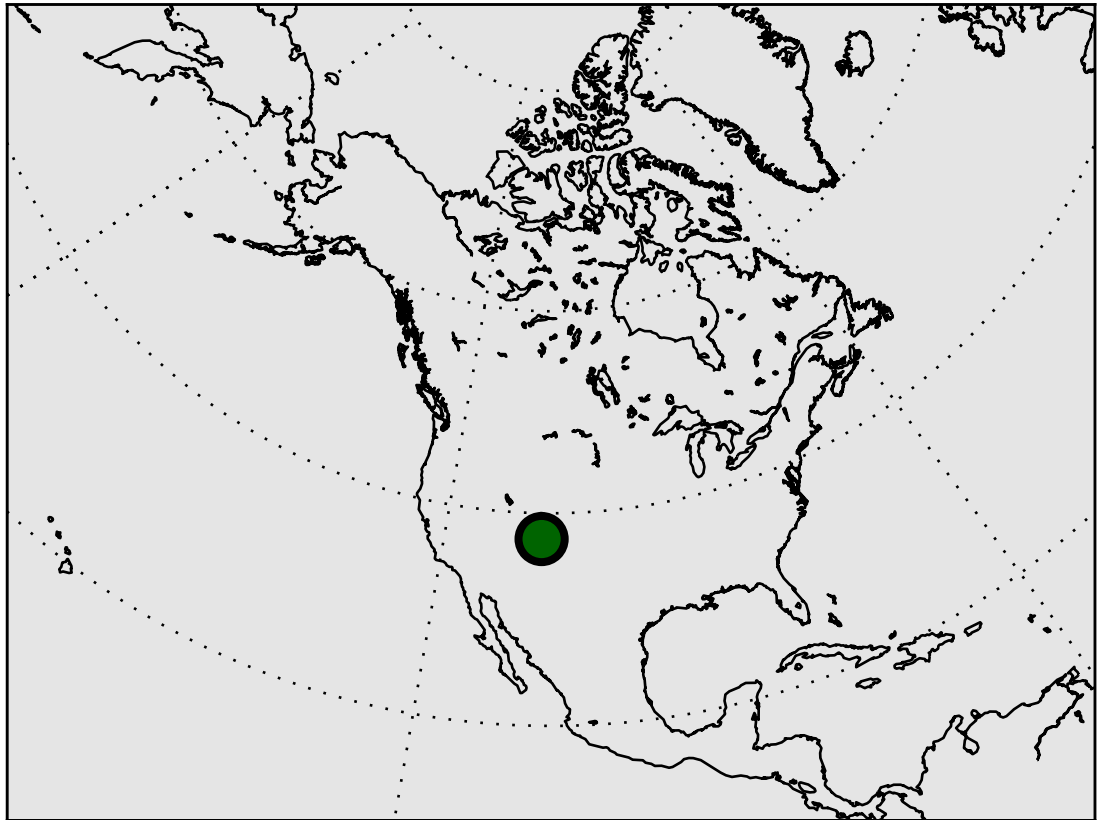

|                    |                                                                                              |
|--------------------|----------------------------------------------------------------------------------------------|
| Dataset name:      | BeefPasture.Petersen.1985                                                                    |
| Archive type:      | LakeSediment                                                                                 |
| Proxy type:        | pollen                                                                                       |
| Variable name:     | temperature                                                                                  |
| Latitude ( ° N):   | 37.47                                                                                        |
| Longitude ( ° E):  | -108.16                                                                                      |
| Elevation (m):     | 3060.0                                                                                       |
| Interp. variable:  | T                                                                                            |
| Interp. detail:    | air@surface                                                                                  |
| Interp. season:    | winter+                                                                                      |
| Interp. direction: | positive                                                                                     |
| Pub. 1 title:      | Palynology in Montezuma County, southwestern Color...                                        |
| Pub. 1 authors:    | Petersen, K.L.                                                                               |
| Pub. 1 year:       | 1985                                                                                         |
| Pub. 1 DOI:        | Petersen, K. L. (1985). Palynology in Montezuma Co...                                        |
| Original data URL: | <a href="http://www.ncdc.noaa.gov/paleo/study/27330">www.ncdc.noaa.gov/paleo/study/27330</a> |

Proxy data and metadata  
**LakeSediment | pollen | CumbresBog.Johnson.2013 | WEB3f7a8527**

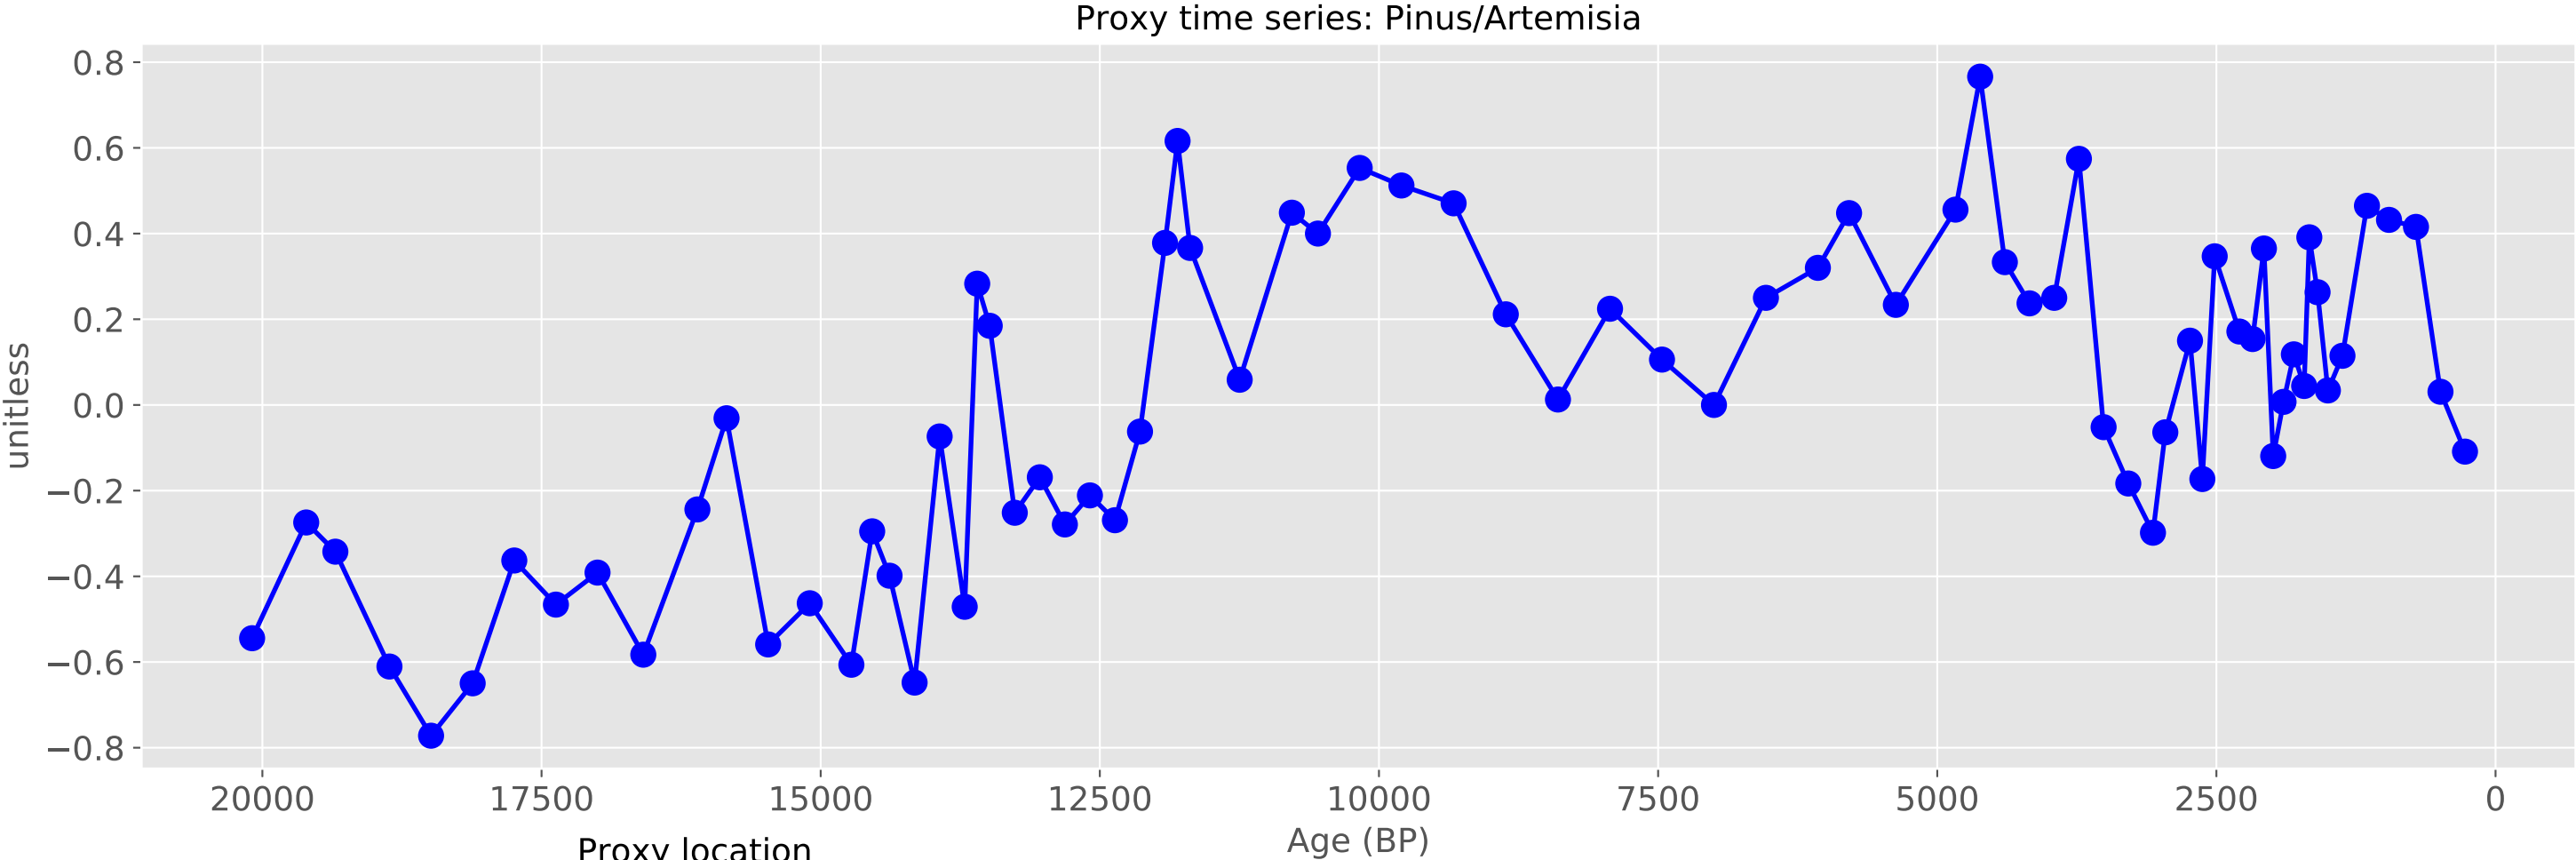

Proxy location  
(37.02 ° N, 106.45 ° W)

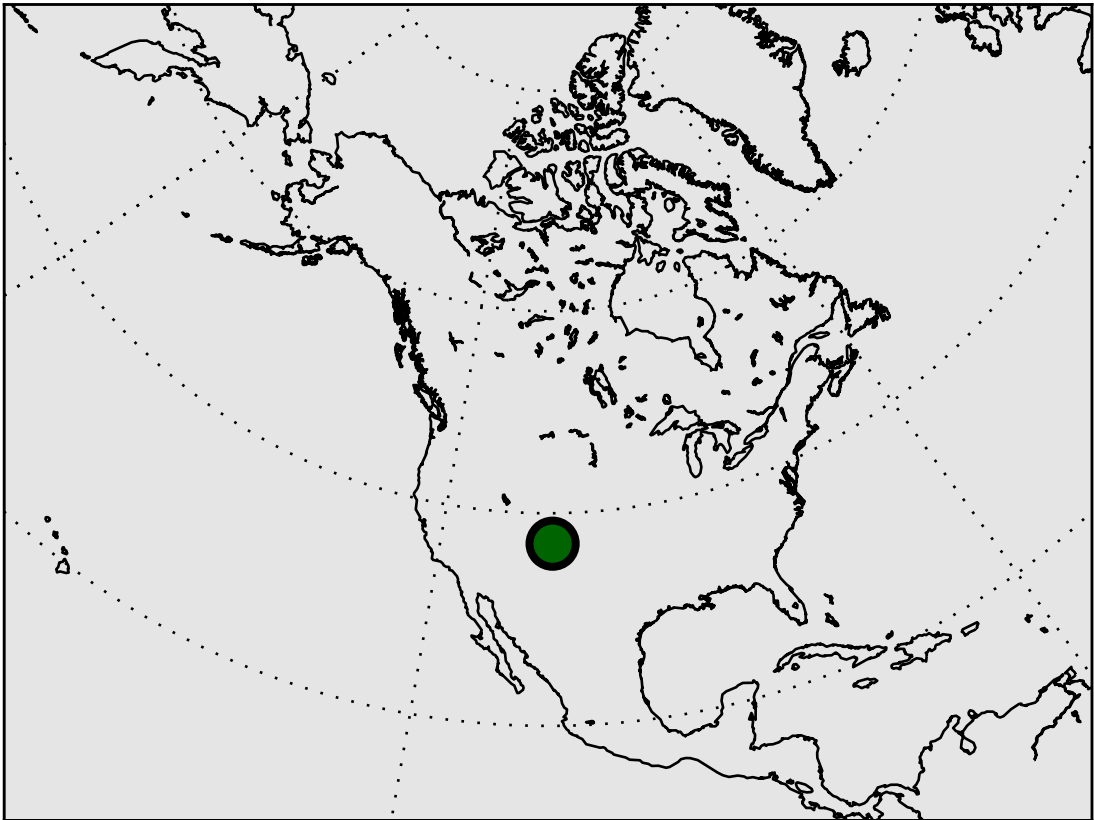

|                    |                                                       |
|--------------------|-------------------------------------------------------|
| Dataset name:      | CumbresBog.Johnson.2013                               |
| Archive type:      | LakeSediment                                          |
| Proxy type:        | pollen                                                |
| Variable name:     | Pinus/Artemisia                                       |
| Latitude ( ° N):   | 37.0216                                               |
| Longitude ( ° E):  | -106.4499                                             |
| Elevation (m):     | 3055.0                                                |
| Interp. variable:  | T                                                     |
| Interp. detail:    | air@surface                                           |
| Interp. season:    | annual                                                |
| Interp. direction: | positive                                              |
| Pub. 1 title:      | A multiproxy record of postglacial climate variabi... |
| Pub. 1 authors:    | Johnson, Bradley G;Jiménez-Moreno, Gonzalo;Eppes, ... |
| Pub. 1 year:       | 2013                                                  |
| Pub. 1 DOI:        | 10.1177/0959683613479682                              |
| Original data URL: | wNA                                                   |

Proxy data and metadata  
**LakeSediment | pollen | CumbresBog.Johnson.2013 | WEB6551a4fe**

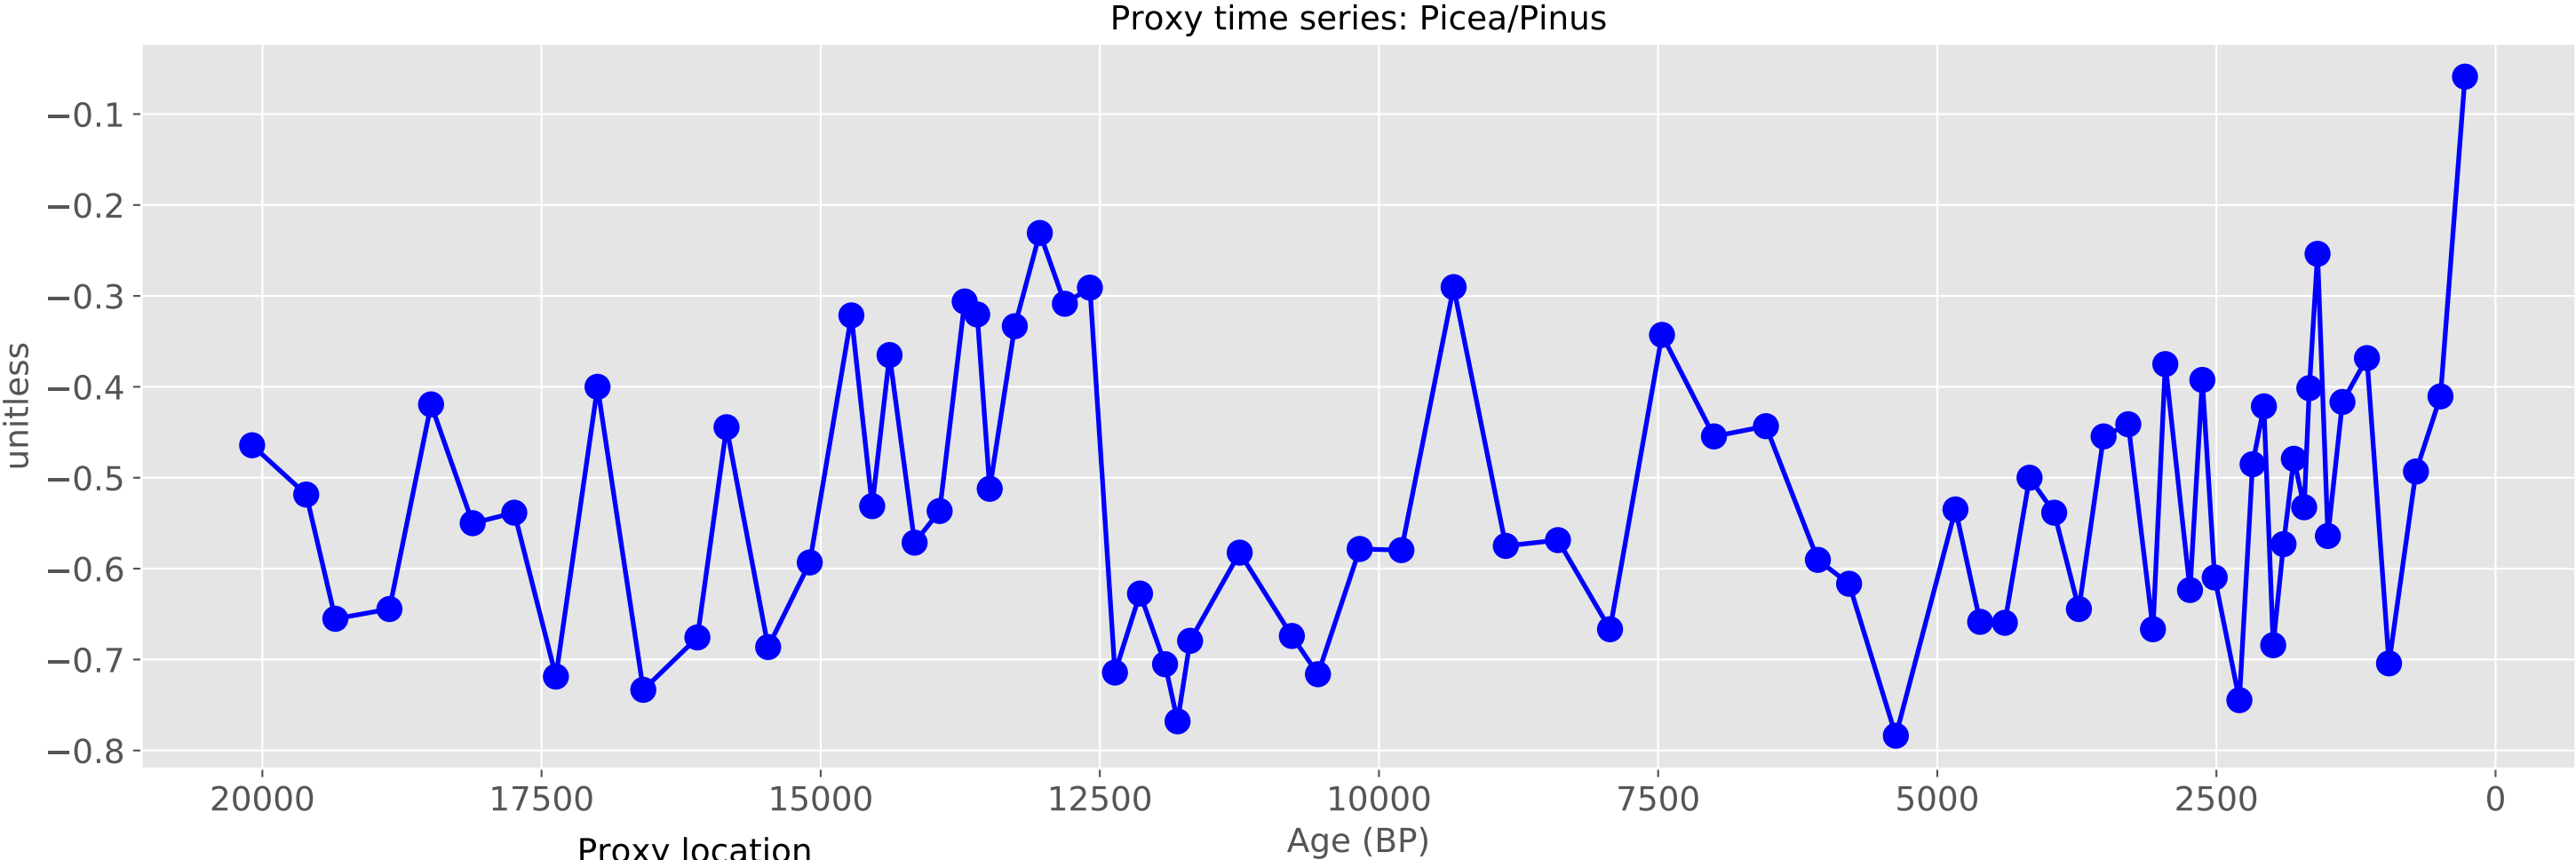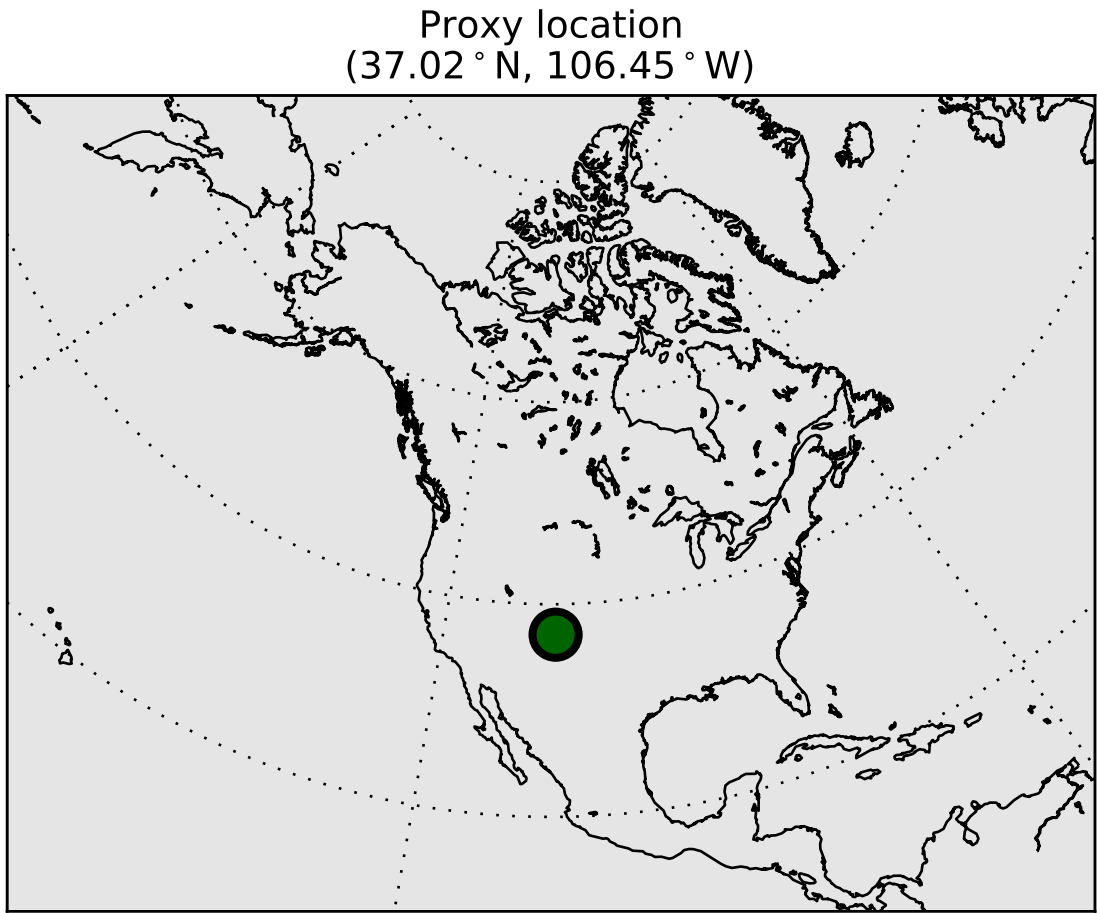

|                    |                                                       |
|--------------------|-------------------------------------------------------|
| Dataset name:      | CumbresBog.Johnson.2013                               |
| Archive type:      | LakeSediment                                          |
| Proxy type:        | pollen                                                |
| Variable name:     | Picea/Pinus                                           |
| Latitude ( ° N):   | 37.0216                                               |
| Longitude ( ° E):  | -106.4499                                             |
| Elevation (m):     | 3055.0                                                |
| Interp. variable:  | T                                                     |
| Interp. detail:    | air@surface                                           |
| Interp. season:    | annual                                                |
| Interp. direction: | positive                                              |
| Pub. 1 title:      | A multiproxy record of postglacial climate variabi... |
| Pub. 1 authors:    | Johnson, Bradley G;Jiménez-Moreno, Gonzalo;Eppes, ... |
| Pub. 1 year:       | 2013                                                  |
| Pub. 1 DOI:        | 10.1177/0959683613479682                              |
| Original data URL: | wNAm                                                  |

Proxy data and metadata  
**LakeSediment | pollen | CumbresBog.Johnson.2013 | WEB91bcbf4c**

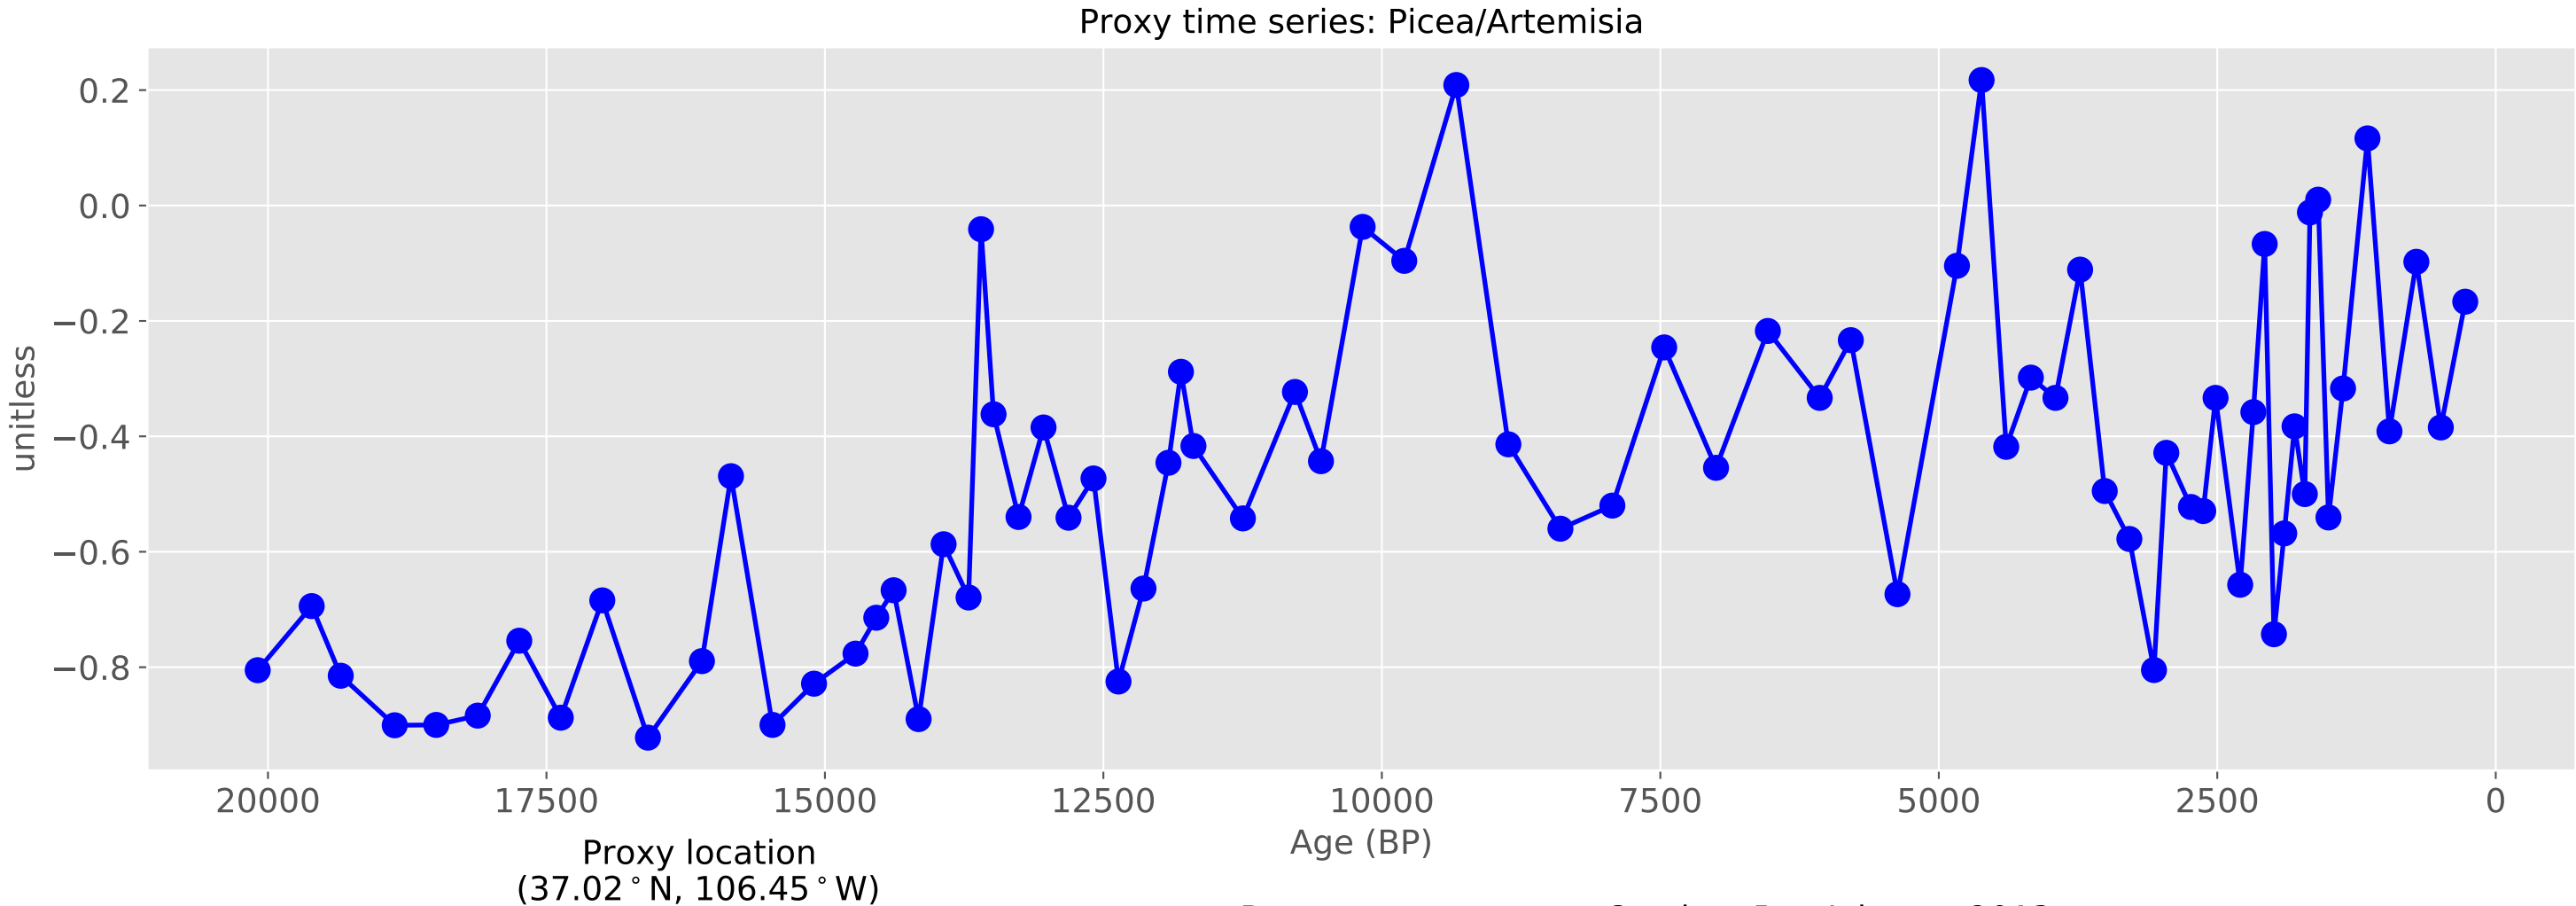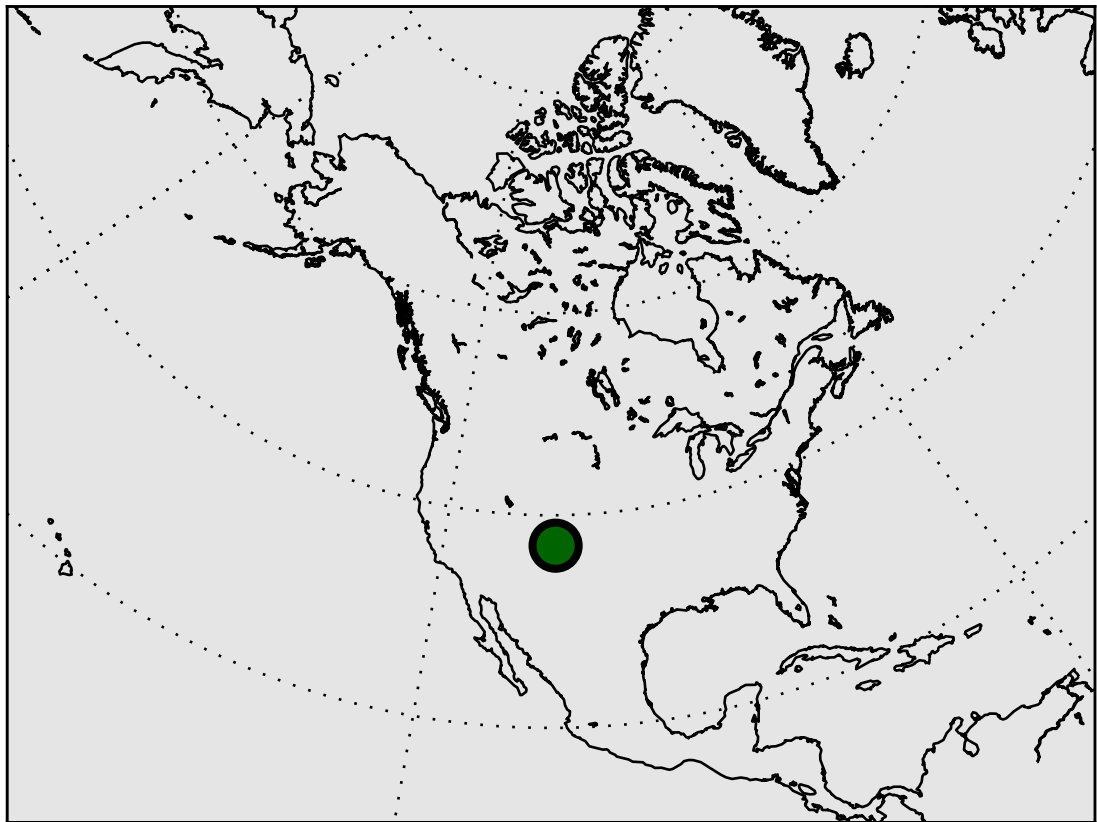

|                    |                                                       |
|--------------------|-------------------------------------------------------|
| Dataset name:      | CumbresBog.Johnson.2013                               |
| Archive type:      | LakeSediment                                          |
| Proxy type:        | pollen                                                |
| Variable name:     | Picea/Artemisia                                       |
| Latitude ( ° N):   | 37.0216                                               |
| Longitude ( ° E):  | -106.4499                                             |
| Elevation (m):     | 3055.0                                                |
| Interp. variable:  | T                                                     |
| Interp. detail:    | air@surface                                           |
| Interp. season:    | annual                                                |
| Interp. direction: | positive                                              |
| Pub. 1 title:      | A multiproxy record of postglacial climate variabi... |
| Pub. 1 authors:    | Johnson, Bradley G;Jiménez-Moreno, Gonzalo;Eppes, ... |
| Pub. 1 year:       | 2013                                                  |
| Pub. 1 DOI:        | 10.1177/0959683613479682                              |
| Original data URL: | wNAm                                                  |



Proxy data and metadata

LakeSediment | pollen | CumbresBog.Johnson.2013 | WEBa664e156

Proxy time series: Pinyon

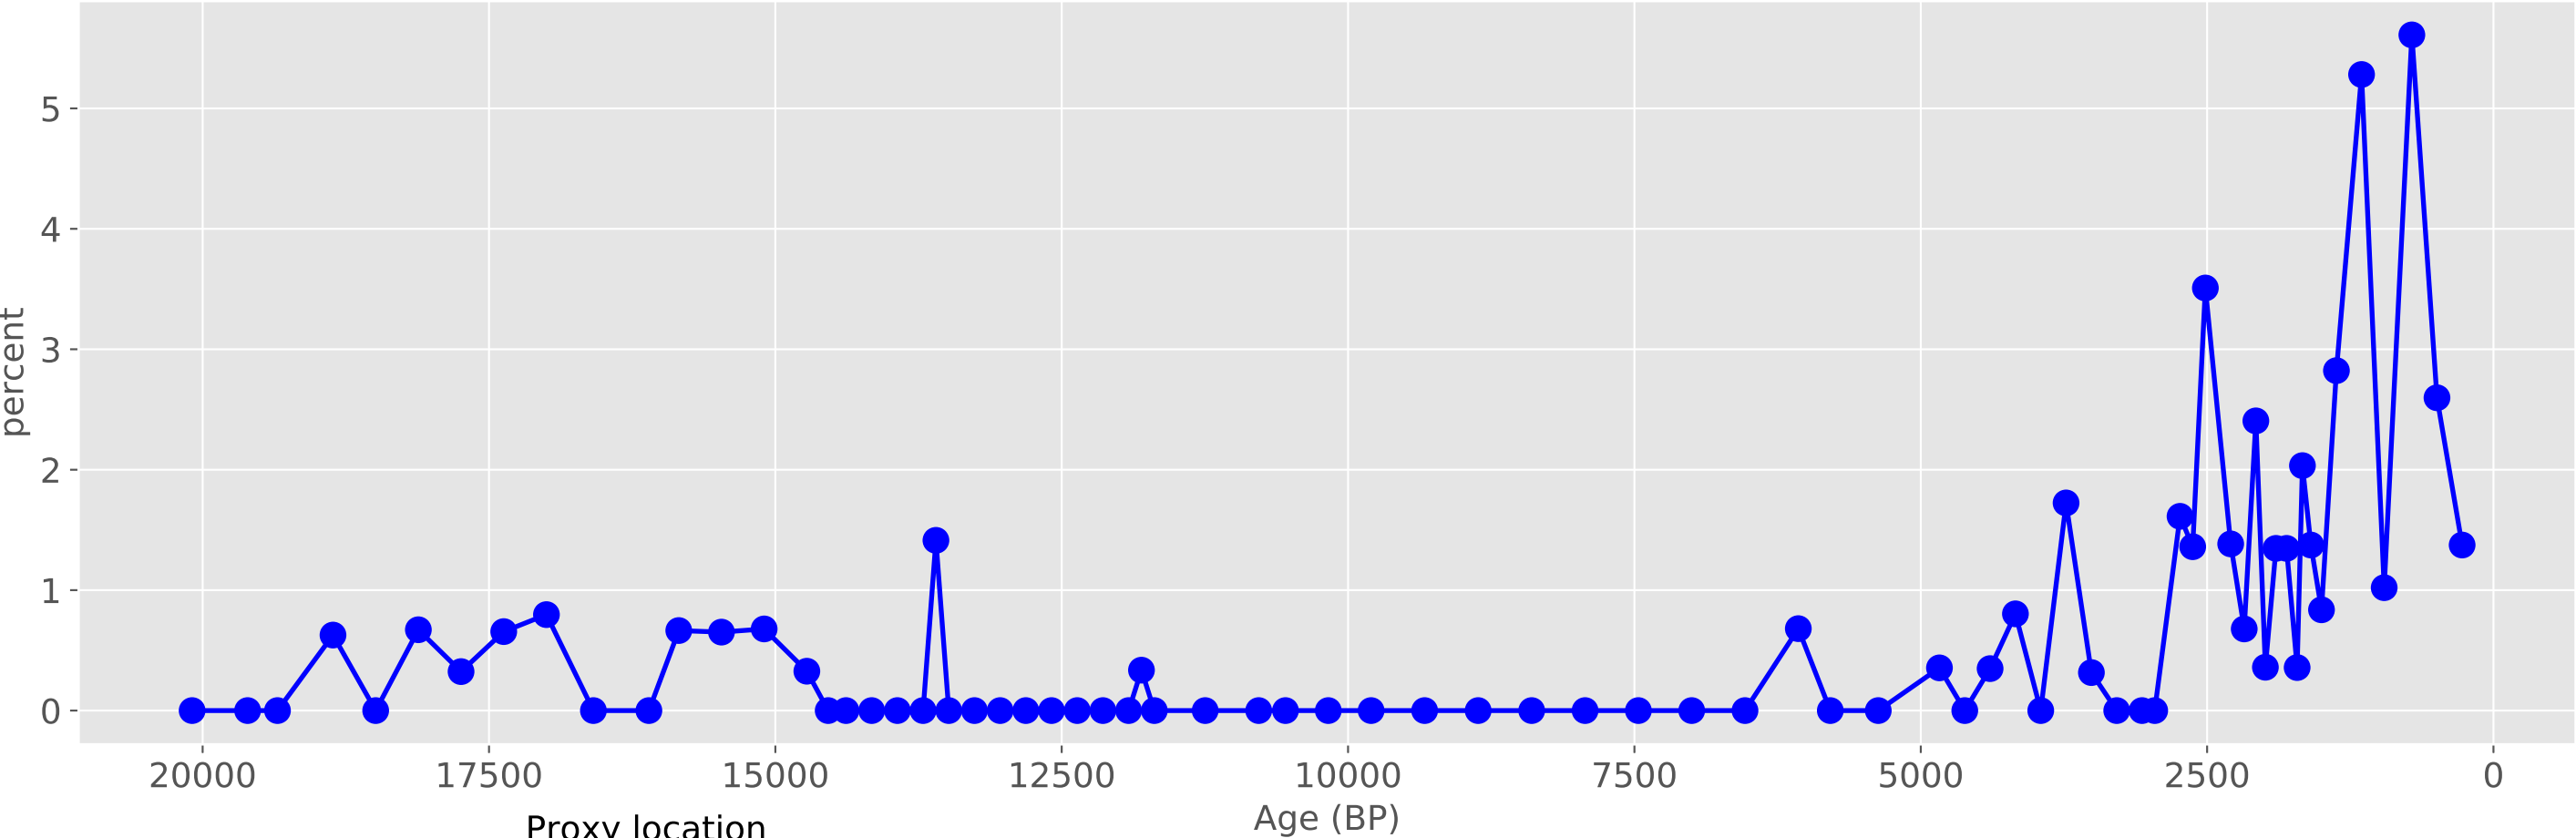

Proxy location  
(37.02 ° N, 106.45 ° W)

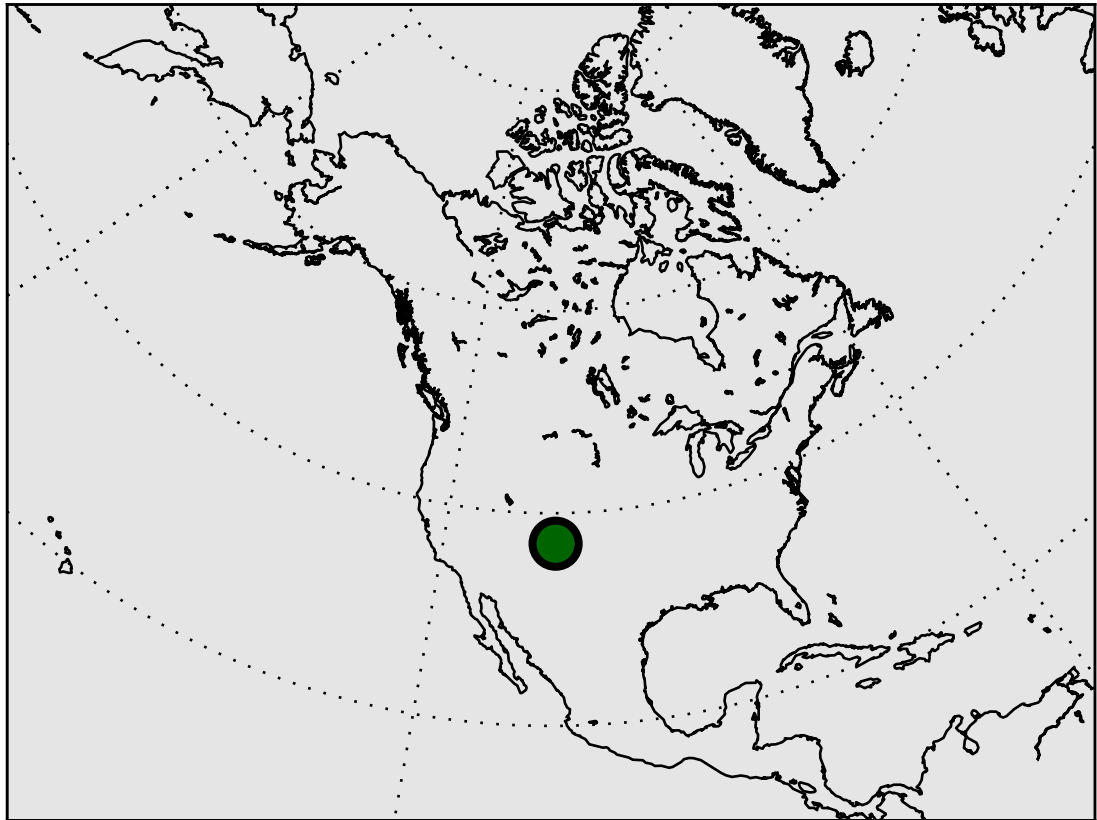

|                    |                                                       |
|--------------------|-------------------------------------------------------|
| Dataset name:      | CumbresBog.Johnson.2013                               |
| Archive type:      | LakeSediment                                          |
| Proxy type:        | pollen                                                |
| Variable name:     | Pinyon                                                |
| Latitude ( ° N):   | 37.0216                                               |
| Longitude ( ° E):  | -106.4499                                             |
| Elevation (m):     | 3055.0                                                |
| Interp. variable:  | P-E                                                   |
| Interp. detail:    | @surface                                              |
| Interp. season:    | winterOnly                                            |
| Interp. direction: | positive                                              |
| Pub. 1 title:      | A multiproxy record of postglacial climate variabi... |
| Pub. 1 authors:    | Johnson, Bradley G;Jiménez-Moreno, Gonzalo;Eppes, ... |
| Pub. 1 year:       | 2013                                                  |
| Pub. 1 DOI:        | 10.1177/0959683613479682                              |
| Original data URL: | wNAm                                                  |

Proxy data and metadata  
LakeSediment | pollen | Ferndale.Albert.1981 | M2Lasjuwzq8P

Proxy time series: temperature

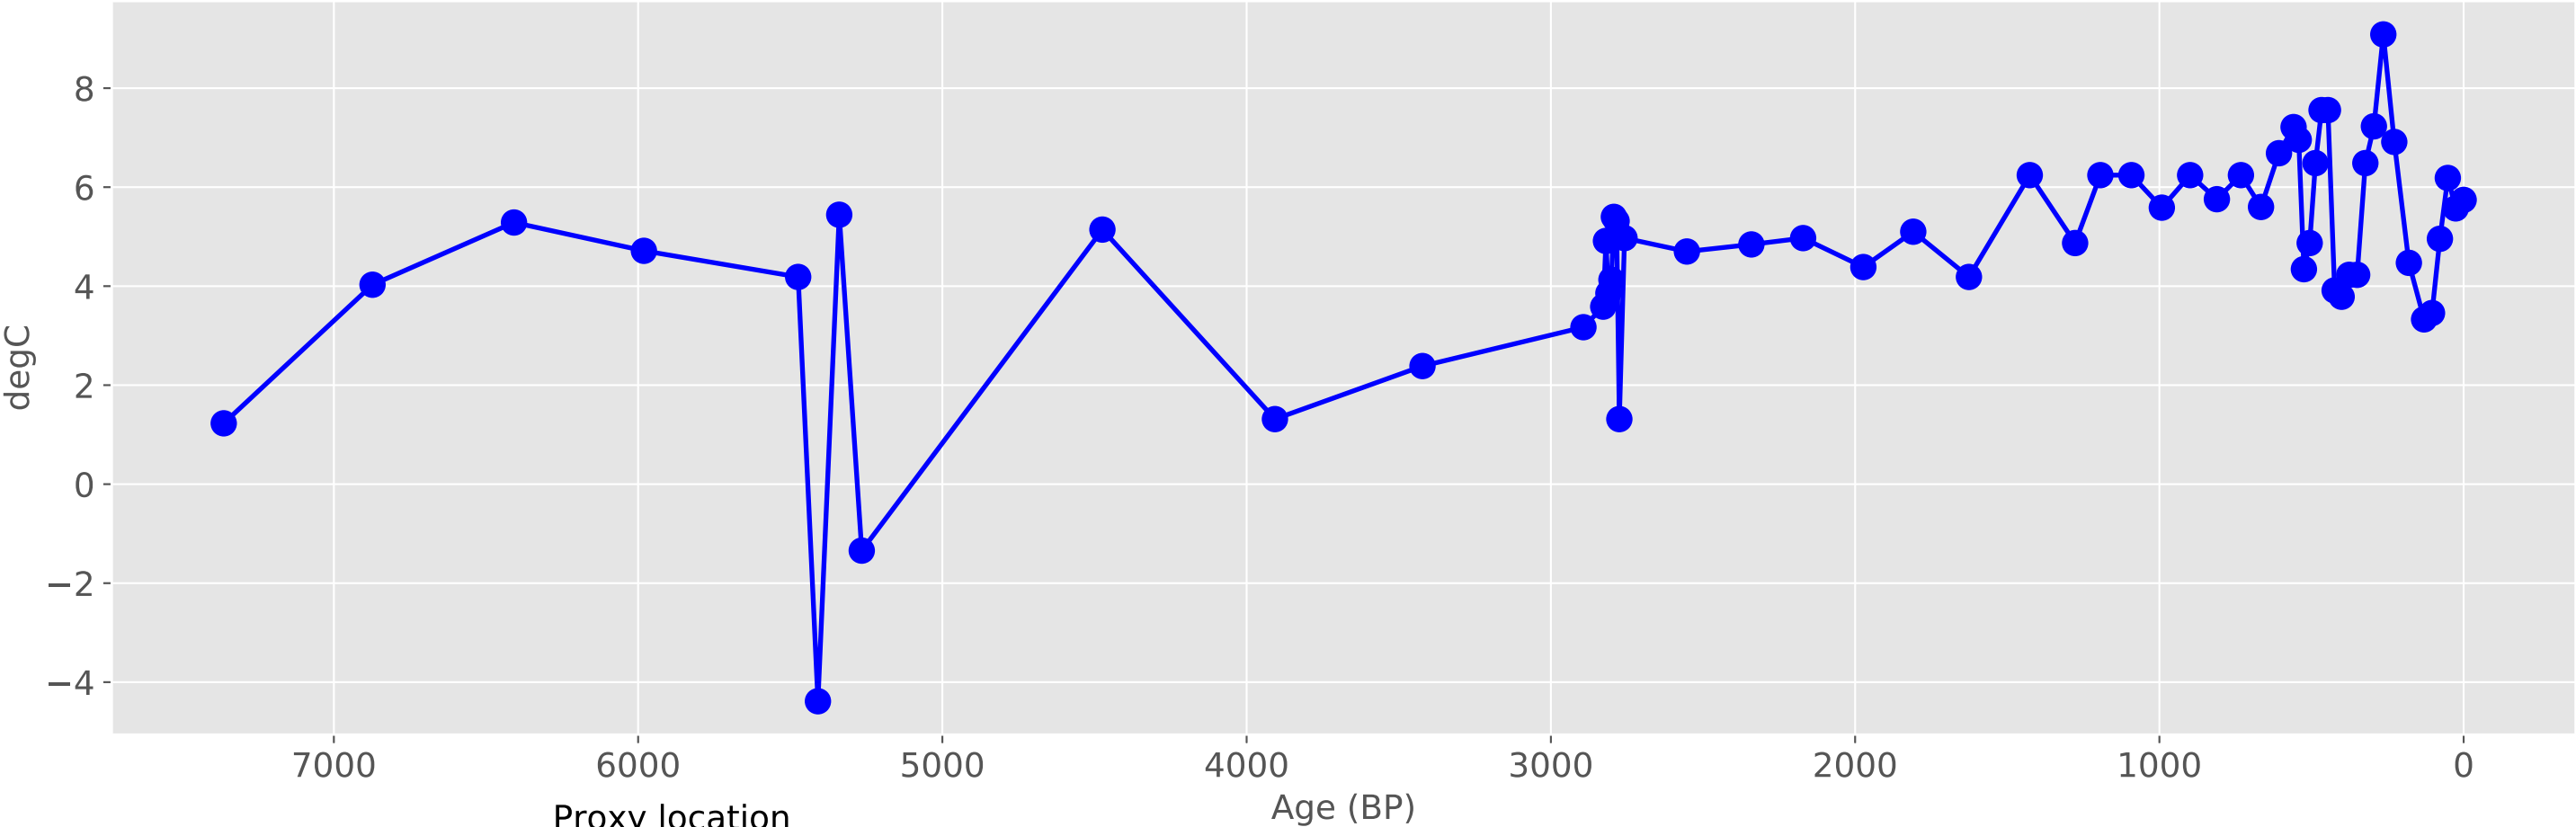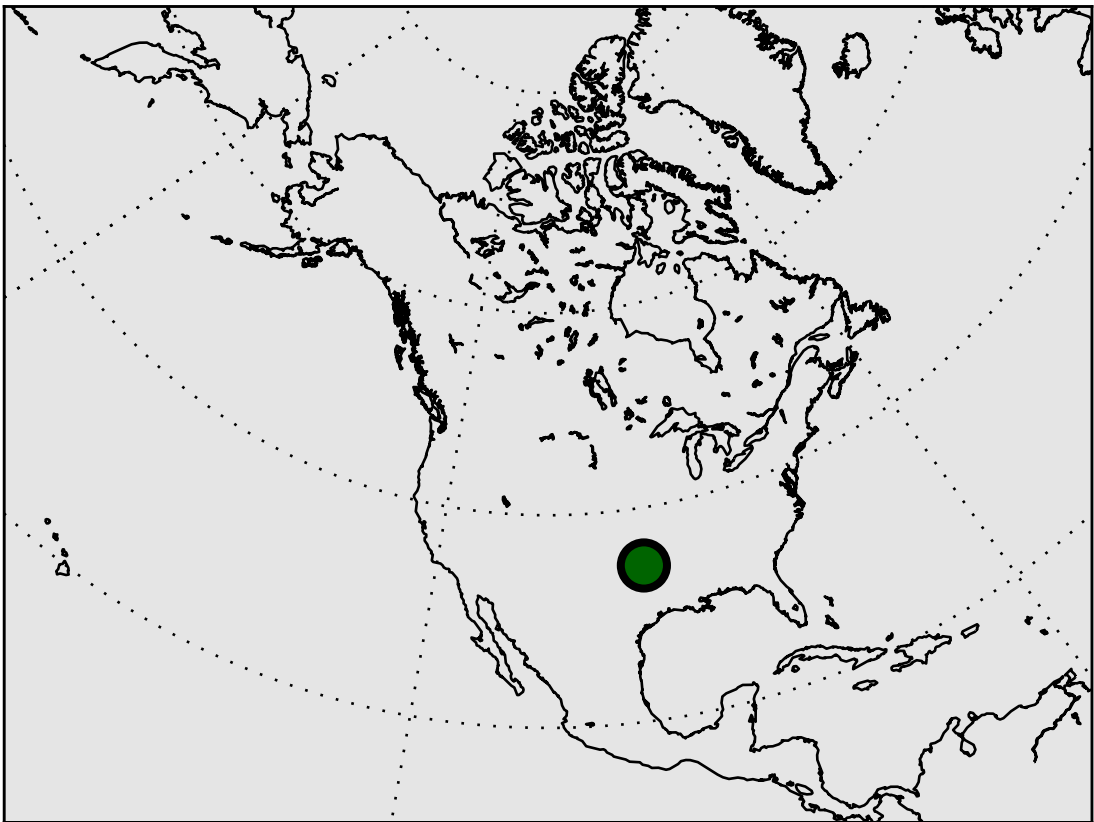

|                    |                                                                                              |
|--------------------|----------------------------------------------------------------------------------------------|
| Dataset name:      | Ferndale.Albert.1981                                                                         |
| Archive type:      | LakeSediment                                                                                 |
| Proxy type:        | pollen                                                                                       |
| Variable name:     | temperature                                                                                  |
| Latitude ( ° N):   | 34.41                                                                                        |
| Longitude ( ° E):  | -95.81                                                                                       |
| Elevation (m):     | 263.0                                                                                        |
| Interp. variable:  | T                                                                                            |
| Interp. detail:    | air@surface                                                                                  |
| Interp. season:    | winter+                                                                                      |
| Interp. direction: | positive                                                                                     |
| Pub. 1 title:      | Ferndale Bog and Natural Lake: Five thousand years...                                        |
| Pub. 1 authors:    | Albert, L.E., and D.G. Wyckoff                                                               |
| Pub. 1 year:       | 1981                                                                                         |
| Pub. 1 DOI:        | Albert, L.E., and D.G. Wyckoff, editors. 1981. Fer...                                        |
| Original data URL: | <a href="http://www.ncdc.noaa.gov/paleo/study/27330">www.ncdc.noaa.gov/paleo/study/27330</a> |

Proxy data and metadata  
**LakeSediment | pollen | Ferndale.Albert.1981 | M2Lfivgg76xP**

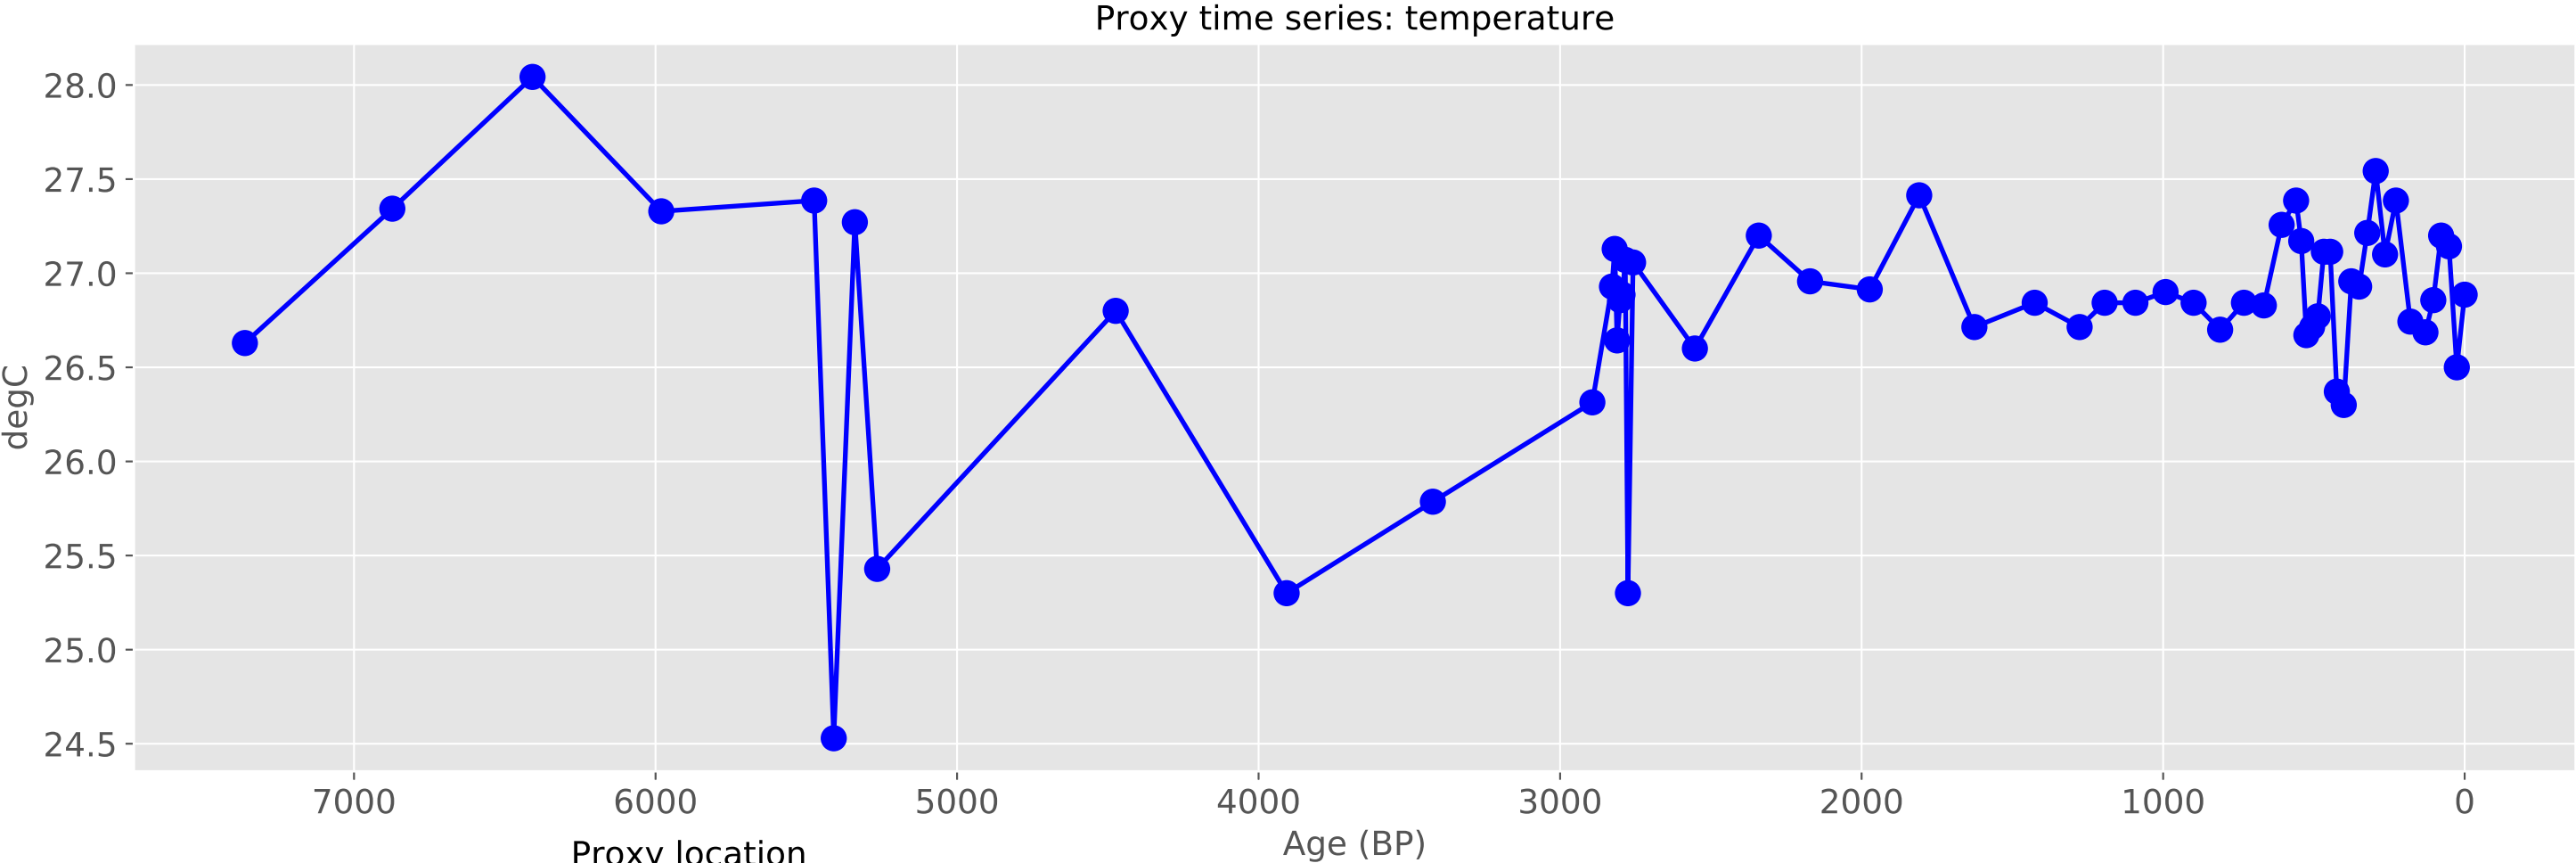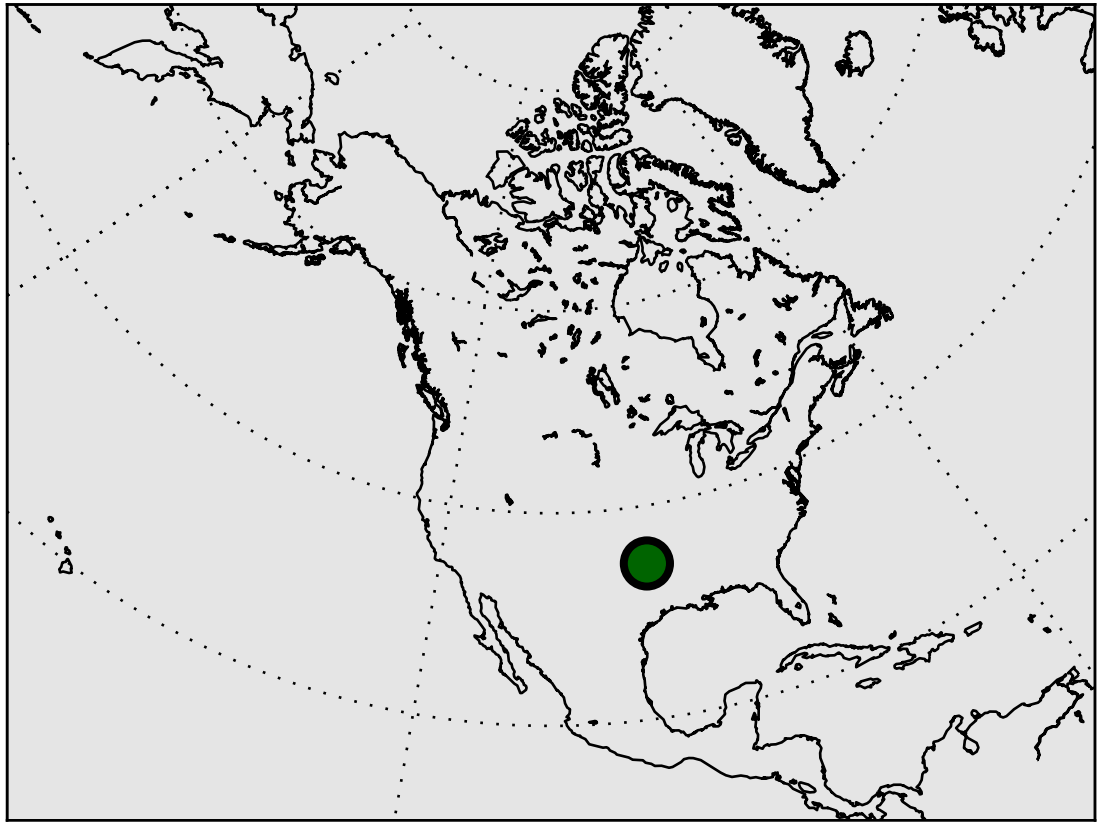

|                    |                                                                                              |
|--------------------|----------------------------------------------------------------------------------------------|
| Dataset name:      | Ferndale.Albert.1981                                                                         |
| Archive type:      | LakeSediment                                                                                 |
| Proxy type:        | pollen                                                                                       |
| Variable name:     | temperature                                                                                  |
| Latitude ( ° N):   | 34.41                                                                                        |
| Longitude ( ° E):  | -95.81                                                                                       |
| Elevation (m):     | 263.0                                                                                        |
| Interp. variable:  | T                                                                                            |
| Interp. detail:    | air@surface                                                                                  |
| Interp. season:    | summer+                                                                                      |
| Interp. direction: | positive                                                                                     |
| Pub. 1 title:      | Ferndale Bog and Natural Lake: Five thousand years...                                        |
| Pub. 1 authors:    | Albert, L.E., and D.G. Wyckoff                                                               |
| Pub. 1 year:       | 1981                                                                                         |
| Pub. 1 DOI:        | Albert, L.E., and D.G. Wyckoff, editors. 1981. Fer...                                        |
| Original data URL: | <a href="http://www.ncdc.noaa.gov/paleo/study/27330">www.ncdc.noaa.gov/paleo/study/27330</a> |

Proxy data and metadata

LakeSediment | pollen | Ferndale.Albert.1981 | M2LjqhxlxgP

Proxy time series: precipitation

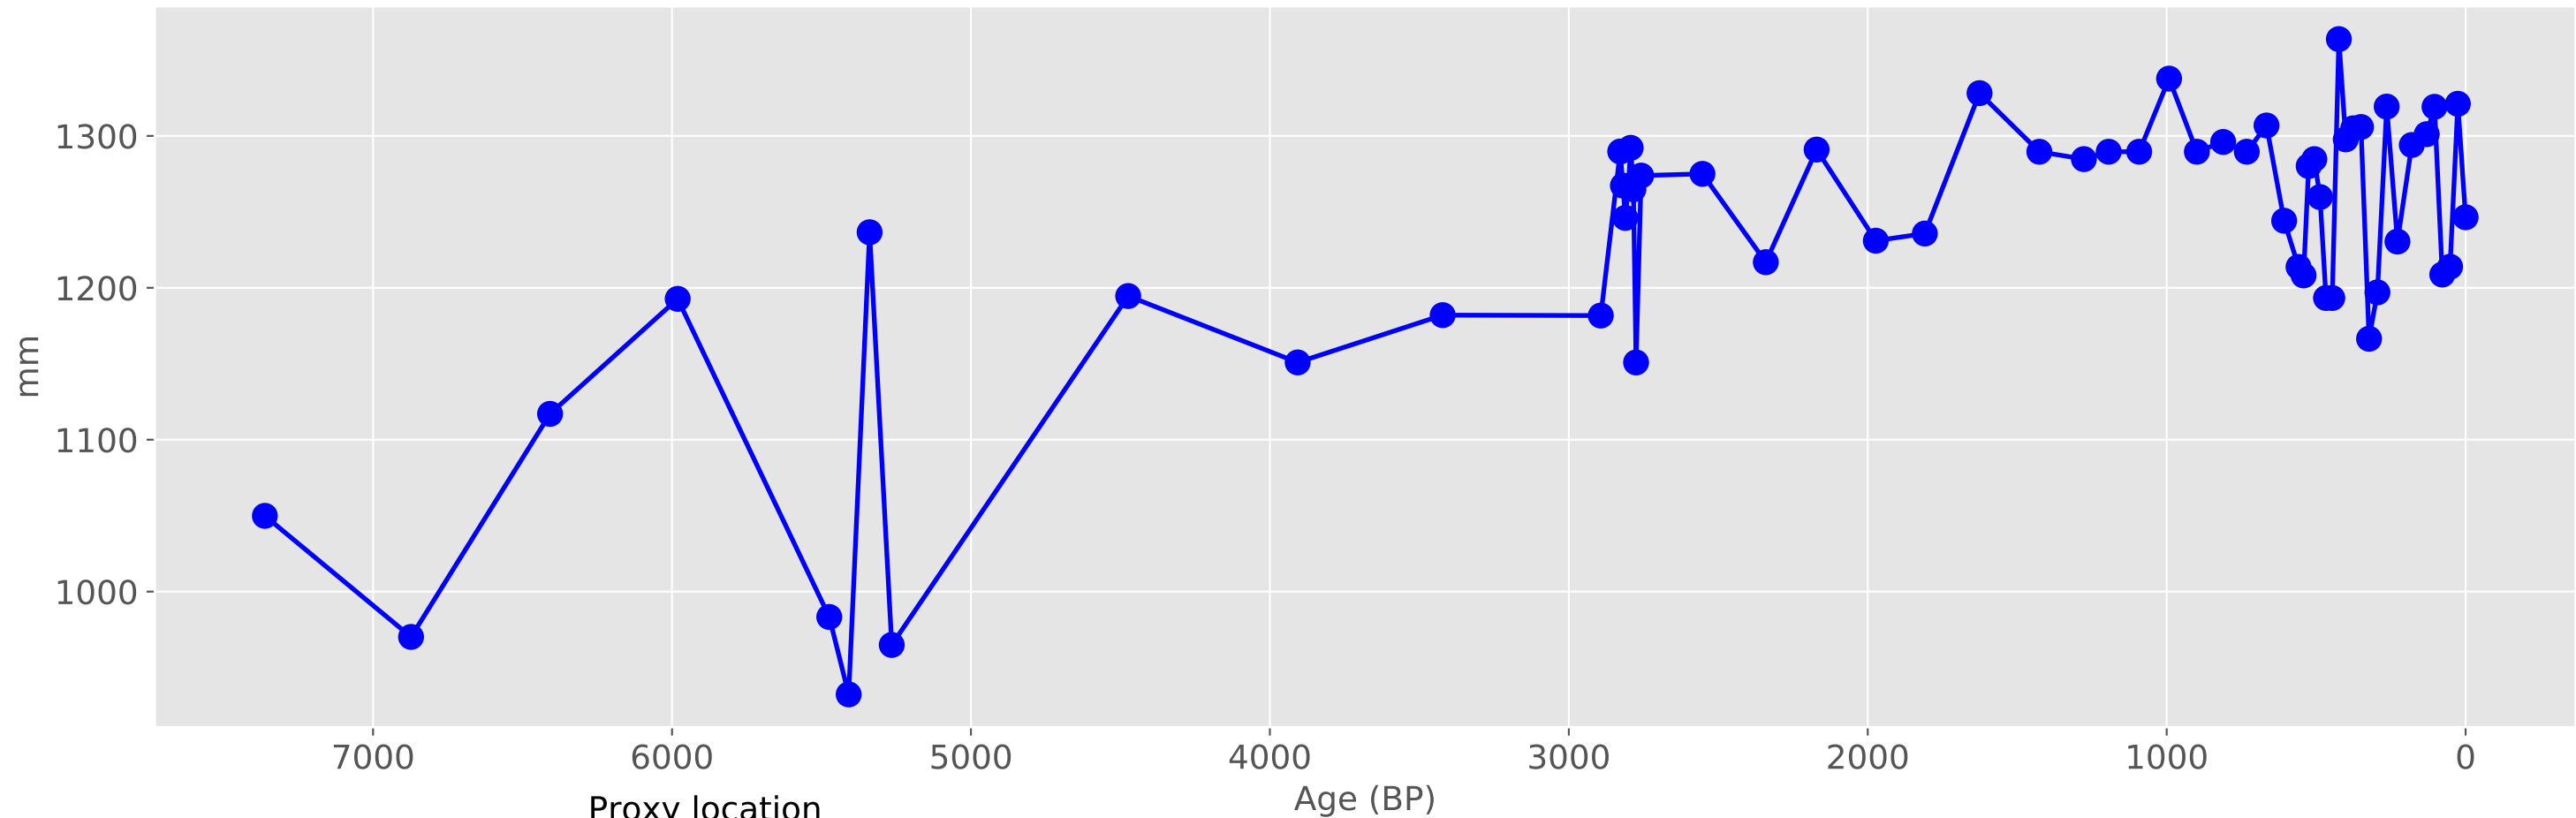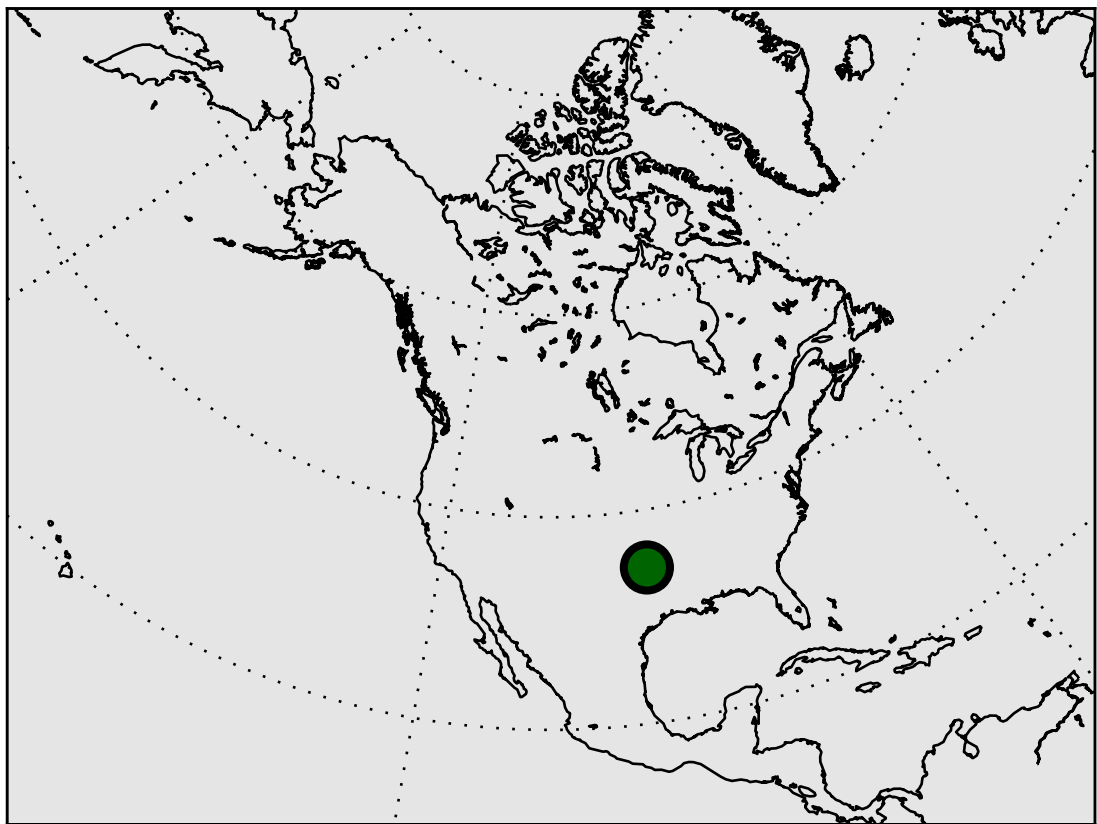

|                    |                                                                                              |
|--------------------|----------------------------------------------------------------------------------------------|
| Dataset name:      | Ferndale.Albert.1981                                                                         |
| Archive type:      | LakeSediment                                                                                 |
| Proxy type:        | pollen                                                                                       |
| Variable name:     | precipitation                                                                                |
| Latitude ( ° N):   | 34.41                                                                                        |
| Longitude ( ° E):  | -95.81                                                                                       |
| Elevation (m):     | 263.0                                                                                        |
| Interp. variable:  | P                                                                                            |
| Interp. detail:    | amount@surface                                                                               |
| Interp. season:    | annual                                                                                       |
| Interp. direction: | positive                                                                                     |
| Pub. 1 title:      | Ferndale Bog and Natural Lake: Five thousand years...                                        |
| Pub. 1 authors:    | Albert, L.E., and D.G. Wyckoff                                                               |
| Pub. 1 year:       | 1981                                                                                         |
| Pub. 1 DOI:        | Albert, L.E., and D.G. Wyckoff, editors. 1981. Fer...                                        |
| Original data URL: | <a href="http://www.ncdc.noaa.gov/paleo/study/27330">www.ncdc.noaa.gov/paleo/study/27330</a> |

Proxy data and metadata

LakeSediment | pollen | Ferndale.Albert.1981 | M2Luyrjlf0P

Proxy time series: temperature

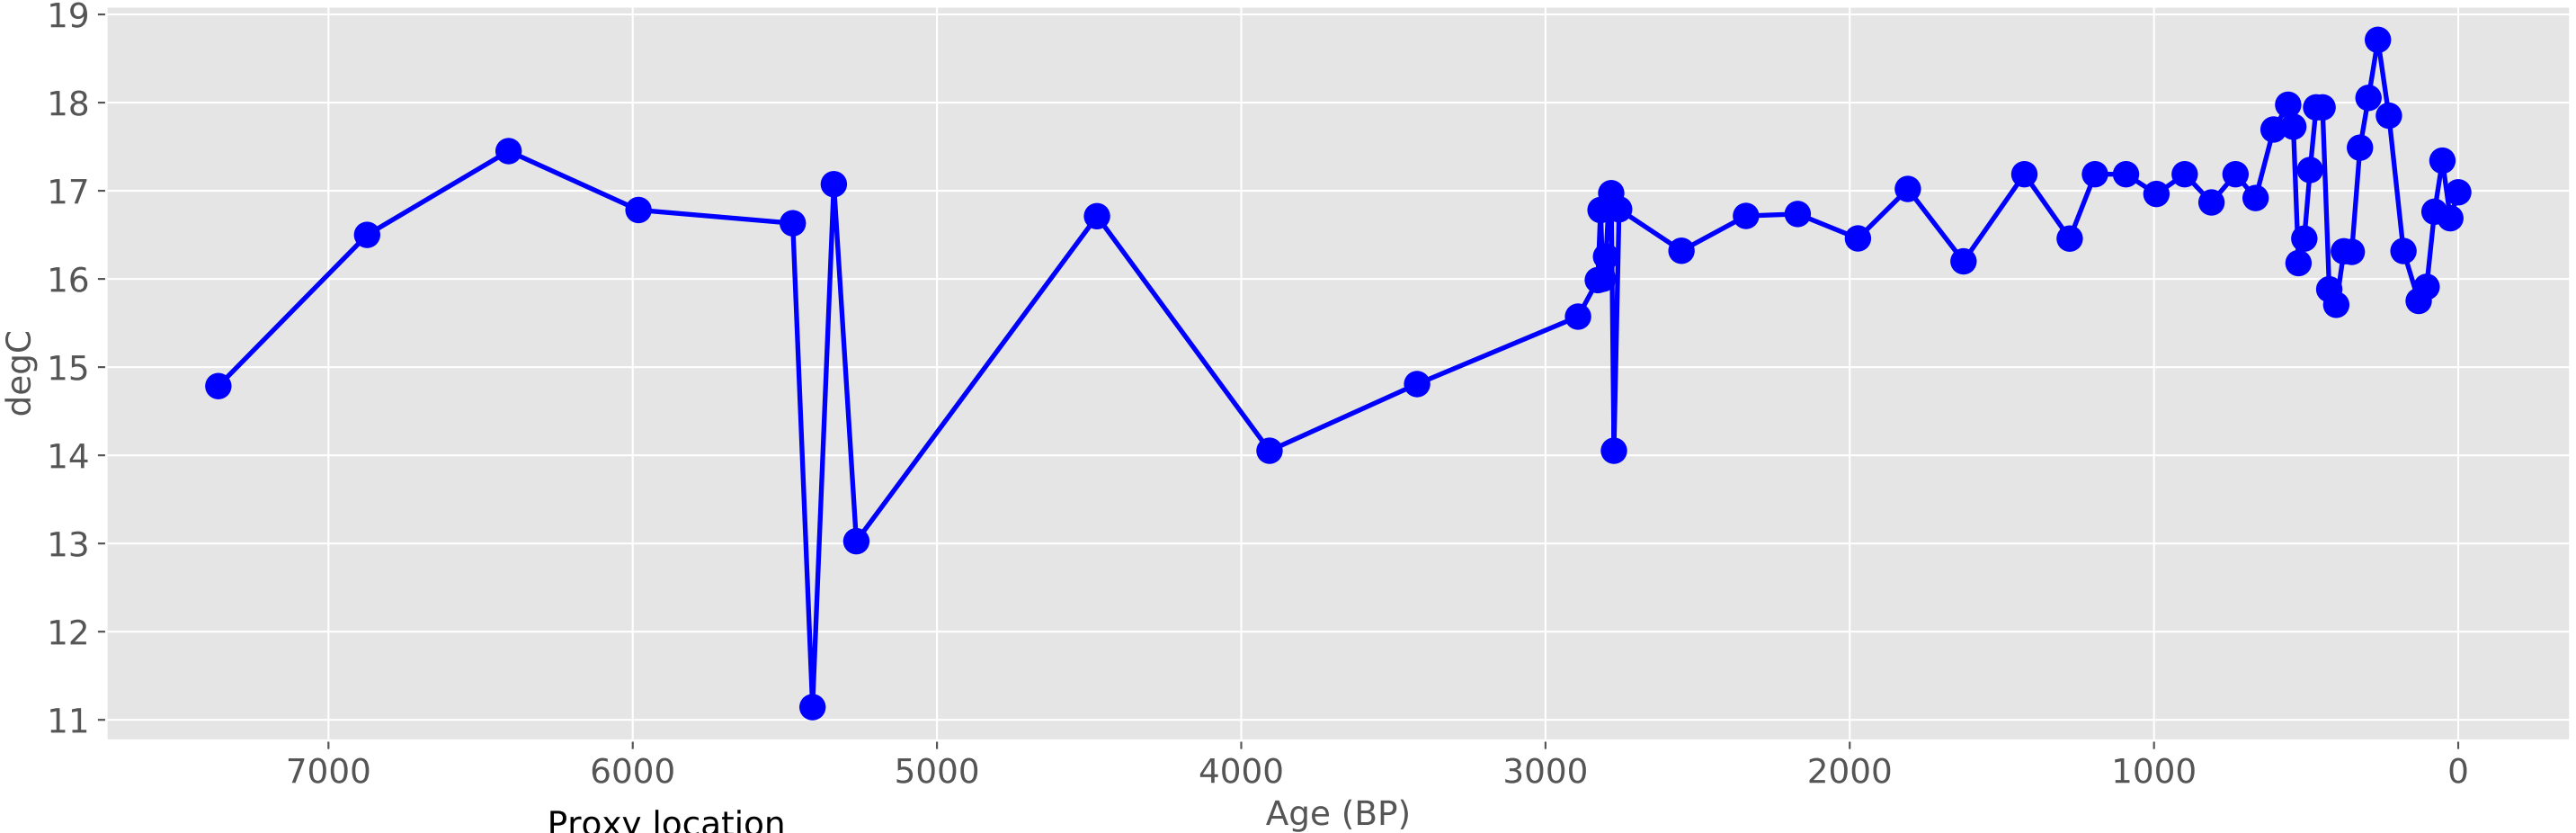

|                    |                                                                                              |
|--------------------|----------------------------------------------------------------------------------------------|
| Dataset name:      | Ferndale.Albert.1981                                                                         |
| Archive type:      | LakeSediment                                                                                 |
| Proxy type:        | pollen                                                                                       |
| Variable name:     | temperature                                                                                  |
| Latitude ( ° N):   | 34.41                                                                                        |
| Longitude ( ° E):  | -95.81                                                                                       |
| Elevation (m):     | 263.0                                                                                        |
| Interp. variable:  | T                                                                                            |
| Interp. detail:    | air@surface                                                                                  |
| Interp. season:    | annual                                                                                       |
| Interp. direction: | positive                                                                                     |
| Pub. 1 title:      | Ferndale Bog and Natural Lake: Five thousand years...                                        |
| Pub. 1 authors:    | Albert, L.E., and D.G. Wyckoff                                                               |
| Pub. 1 year:       | 1981                                                                                         |
| Pub. 1 DOI:        | Albert, L.E., and D.G. Wyckoff, editors. 1981. Fer...                                        |
| Original data URL: | <a href="http://www.ncdc.noaa.gov/paleo/study/27330">www.ncdc.noaa.gov/paleo/study/27330</a> |

Proxy data and metadata  
LakeSediment | pollen | Abalone.Cole.1994 | M2Leedqkm0xP

Proxy time series: precipitation

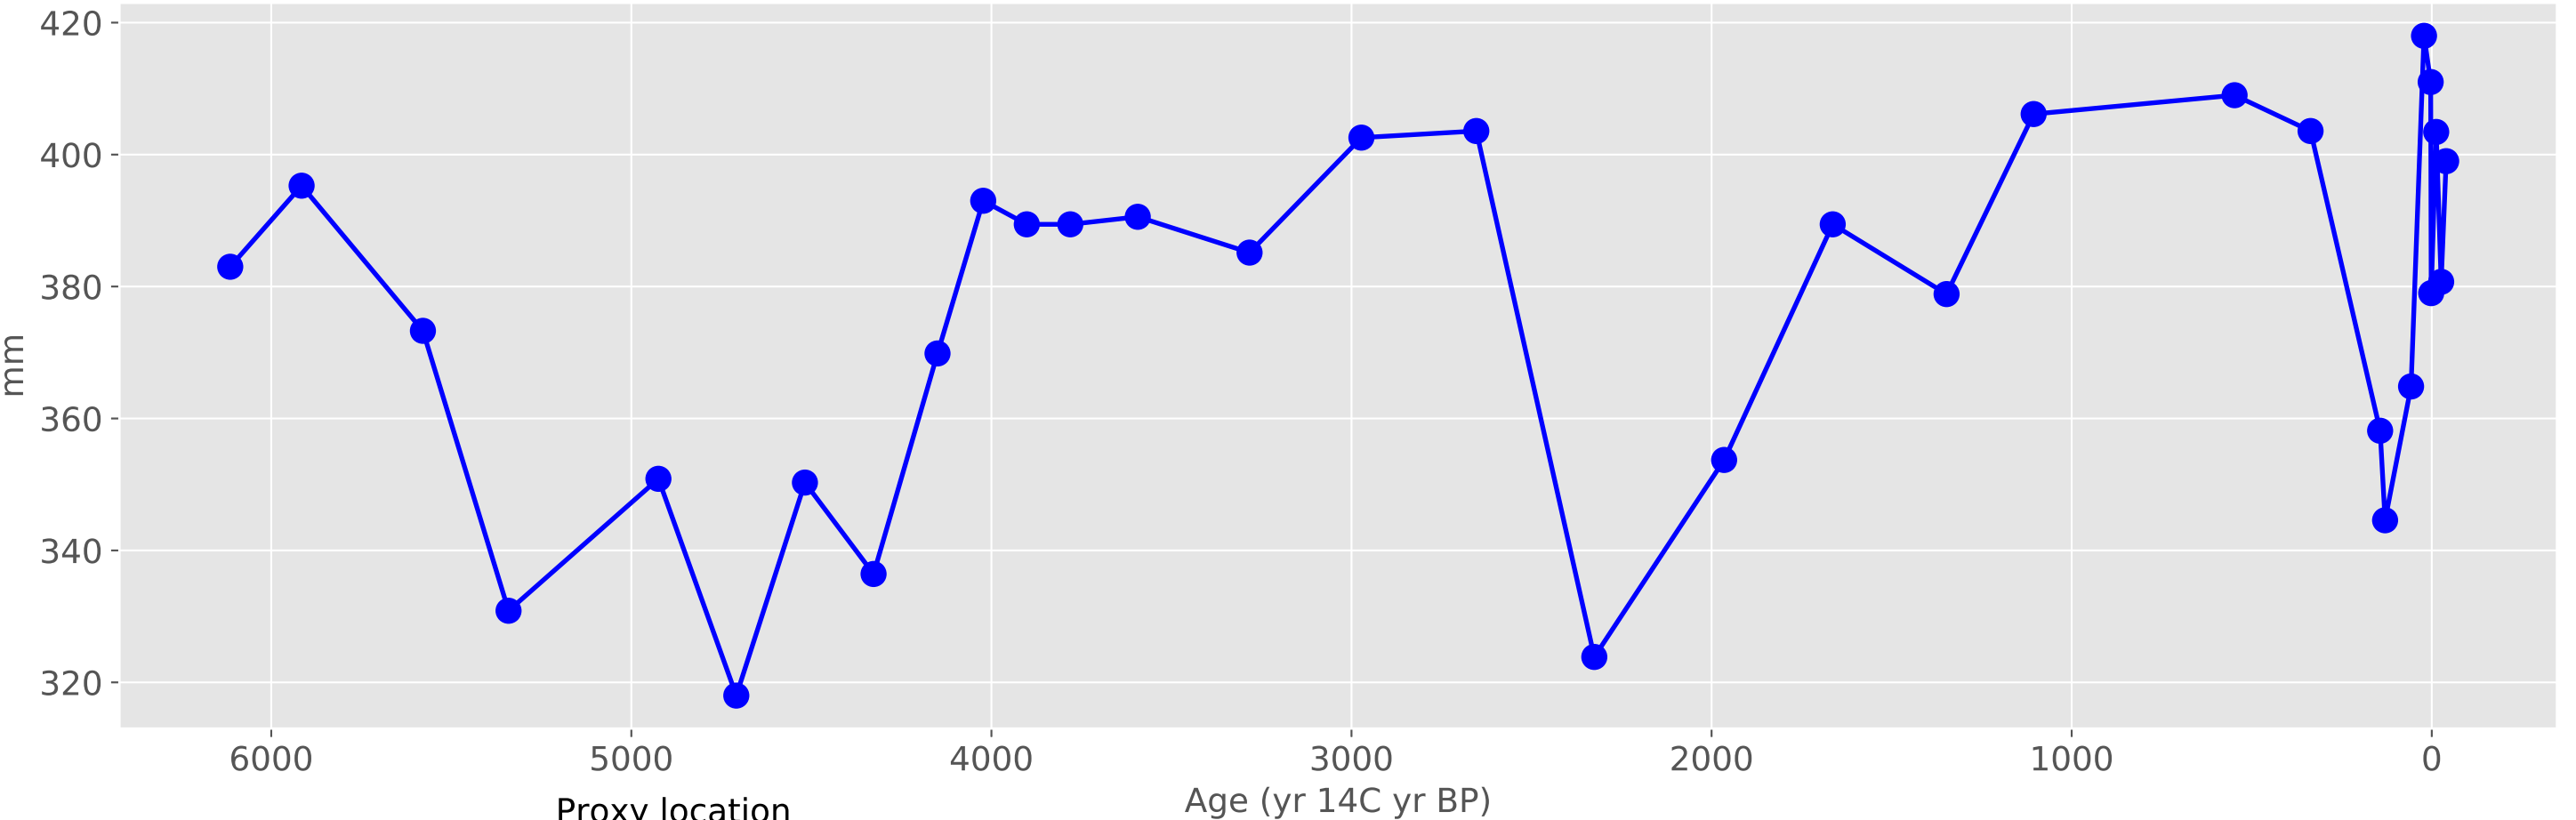

Proxy location  
(33.96 ° N, 119.98 ° W)

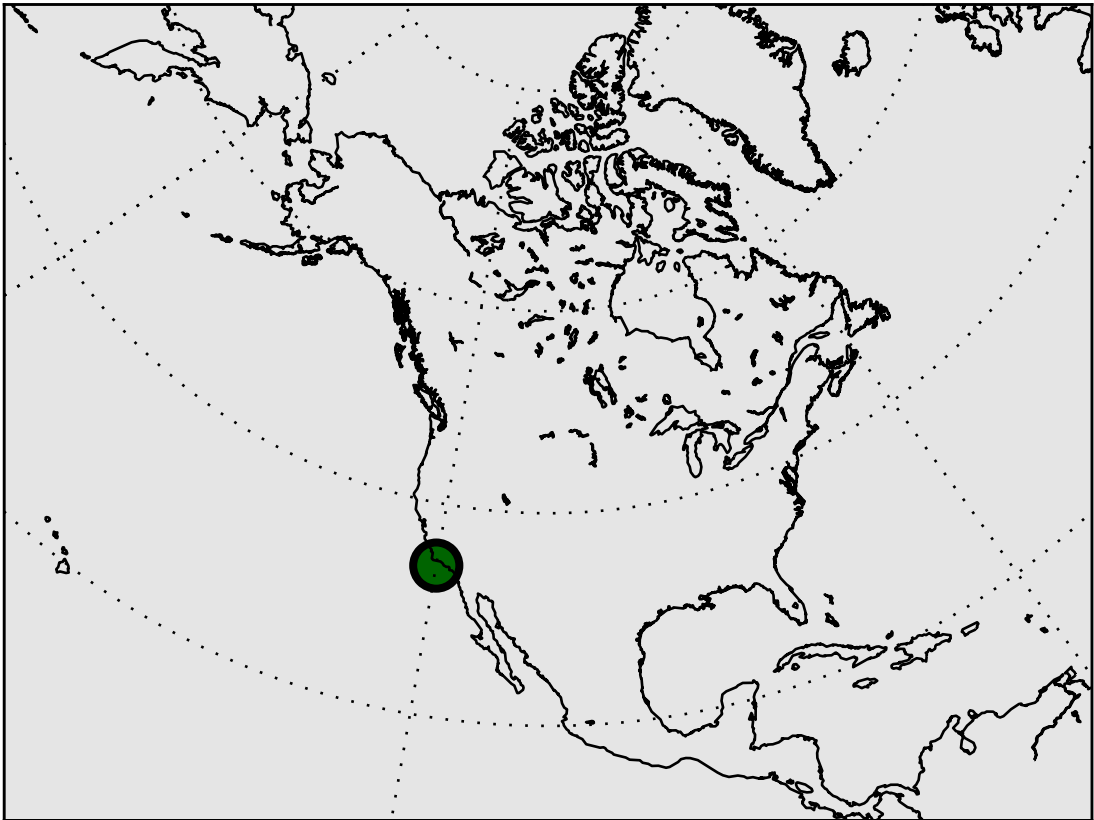

|                    |                                                       |
|--------------------|-------------------------------------------------------|
| Dataset name:      | Abalone.Cole.1994                                     |
| Archive type:      | LakeSediment                                          |
| Proxy type:        | pollen                                                |
| Variable name:     | precipitation                                         |
| Latitude ( ° N):   | 33.96                                                 |
| Longitude ( ° E):  | -119.98                                               |
| Elevation (m):     | 0.0                                                   |
| Interp. variable:  | P                                                     |
| Interp. detail:    | amount@surface                                        |
| Interp. season:    | annual                                                |
| Interp. direction: | positive                                              |
| Pub. 1 title:      | Holocene paleoecology of an estuary on Santa Rosa ... |
| Pub. 1 authors:    | Cole, Kenneth L.; Liu, Geng-Wu                        |
| Pub. 1 year:       | 1994                                                  |
| Pub. 1 DOI:        | 10.1006/qres.1994.1037                                |
| Original data URL: | www.ncdc.noaa.gov/paleo/study/27330                   |



Proxy data and metadata  
LakeSediment | pollen | Abalone.Cole.1994 | M2Lhfelk1bfP

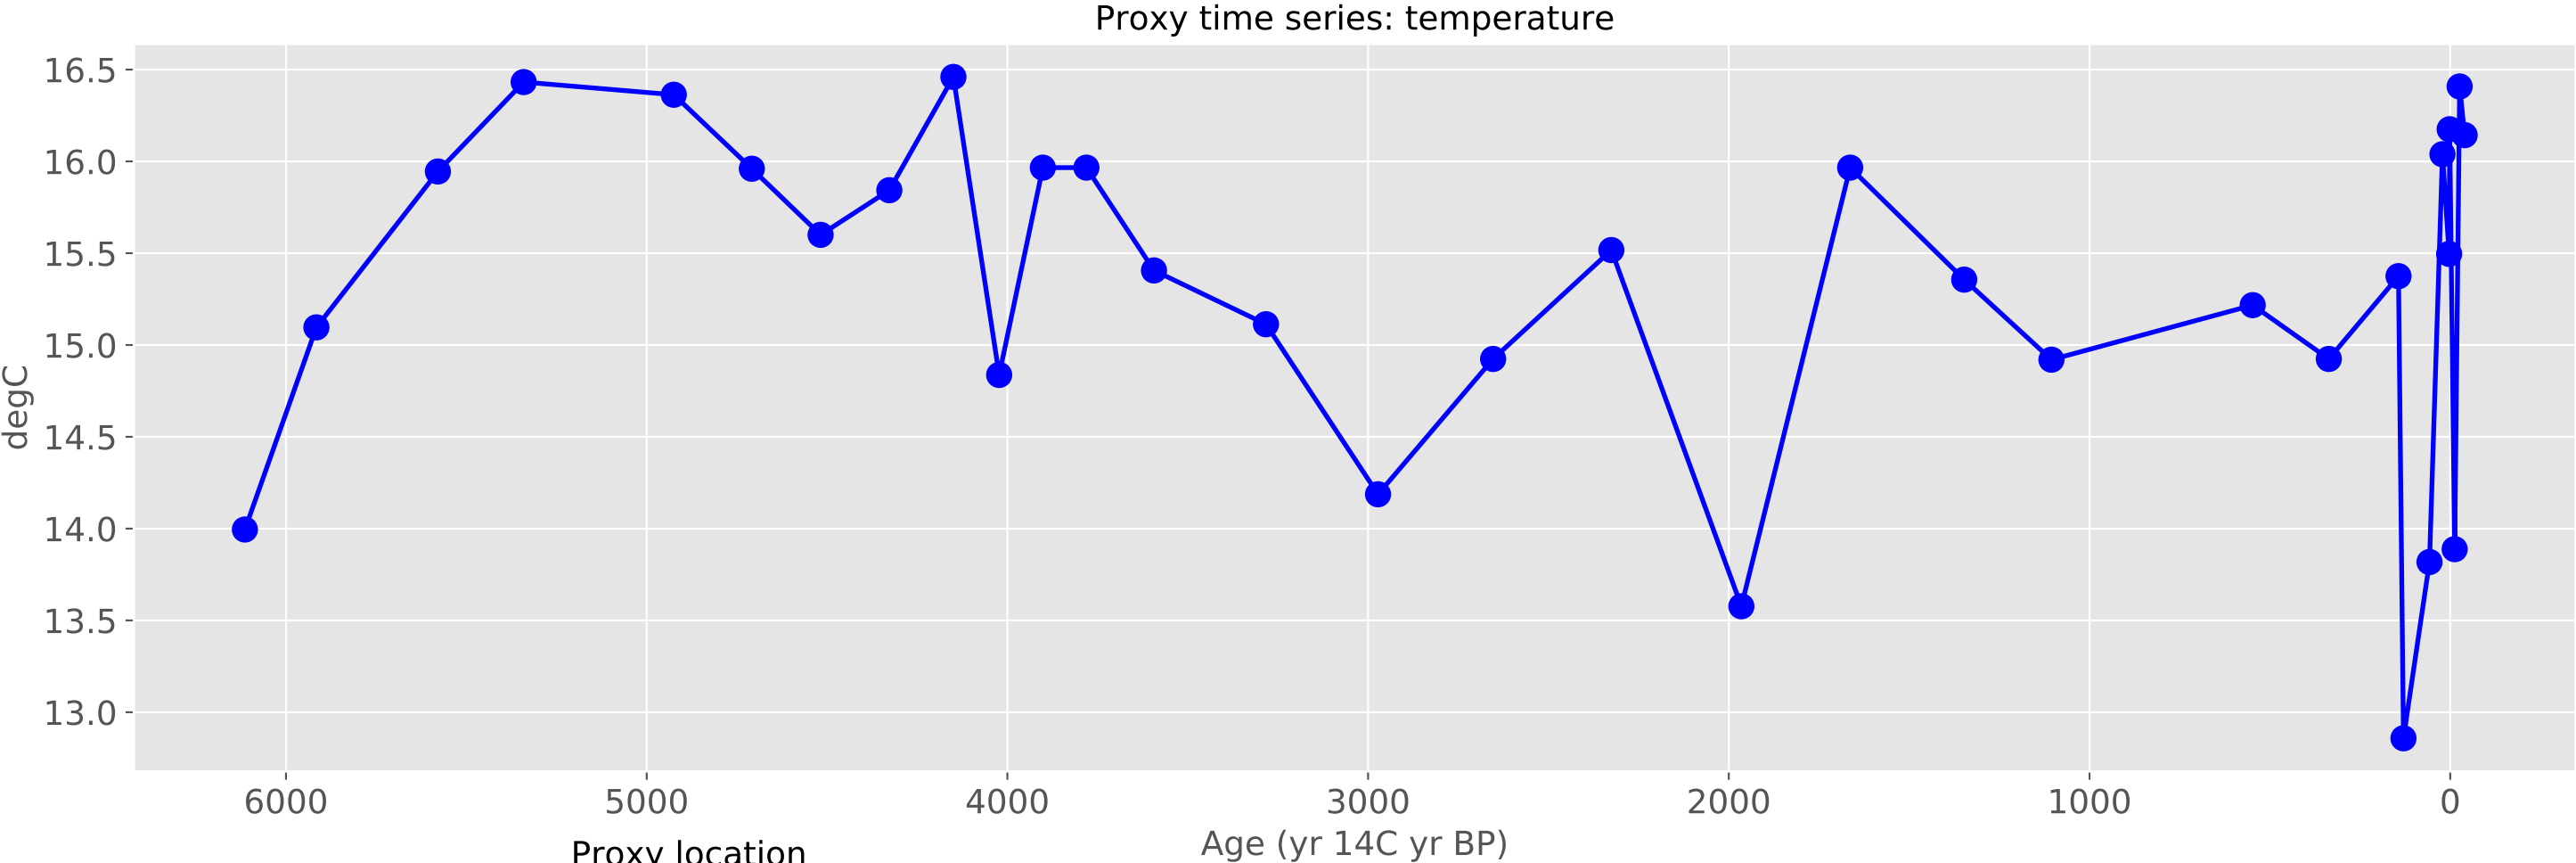

|                    |                                                       |
|--------------------|-------------------------------------------------------|
| Dataset name:      | Abalone.Cole.1994                                     |
| Archive type:      | LakeSediment                                          |
| Proxy type:        | pollen                                                |
| Variable name:     | temperature                                           |
| Latitude ( ° N):   | 33.96                                                 |
| Longitude ( ° E):  | -119.98                                               |
| Elevation (m):     | 0.0                                                   |
| Interp. variable:  | T                                                     |
| Interp. detail:    | air@surface                                           |
| Interp. season:    | annual                                                |
| Interp. direction: | positive                                              |
| Pub. 1 title:      | Holocene paleoecology of an estuary on Santa Rosa ... |
| Pub. 1 authors:    | Cole, Kenneth L.; Liu, Geng-Wu                        |
| Pub. 1 year:       | 1994                                                  |
| Pub. 1 DOI:        | 10.1006/qres.1994.1037                                |
| Original data URL: | www.ncdc.noaa.gov/paleo/study/27330                   |

Proxy data and metadata  
LakeSediment | pollen | Abalone.Cole.1994 | M2Lupm3c8kbP

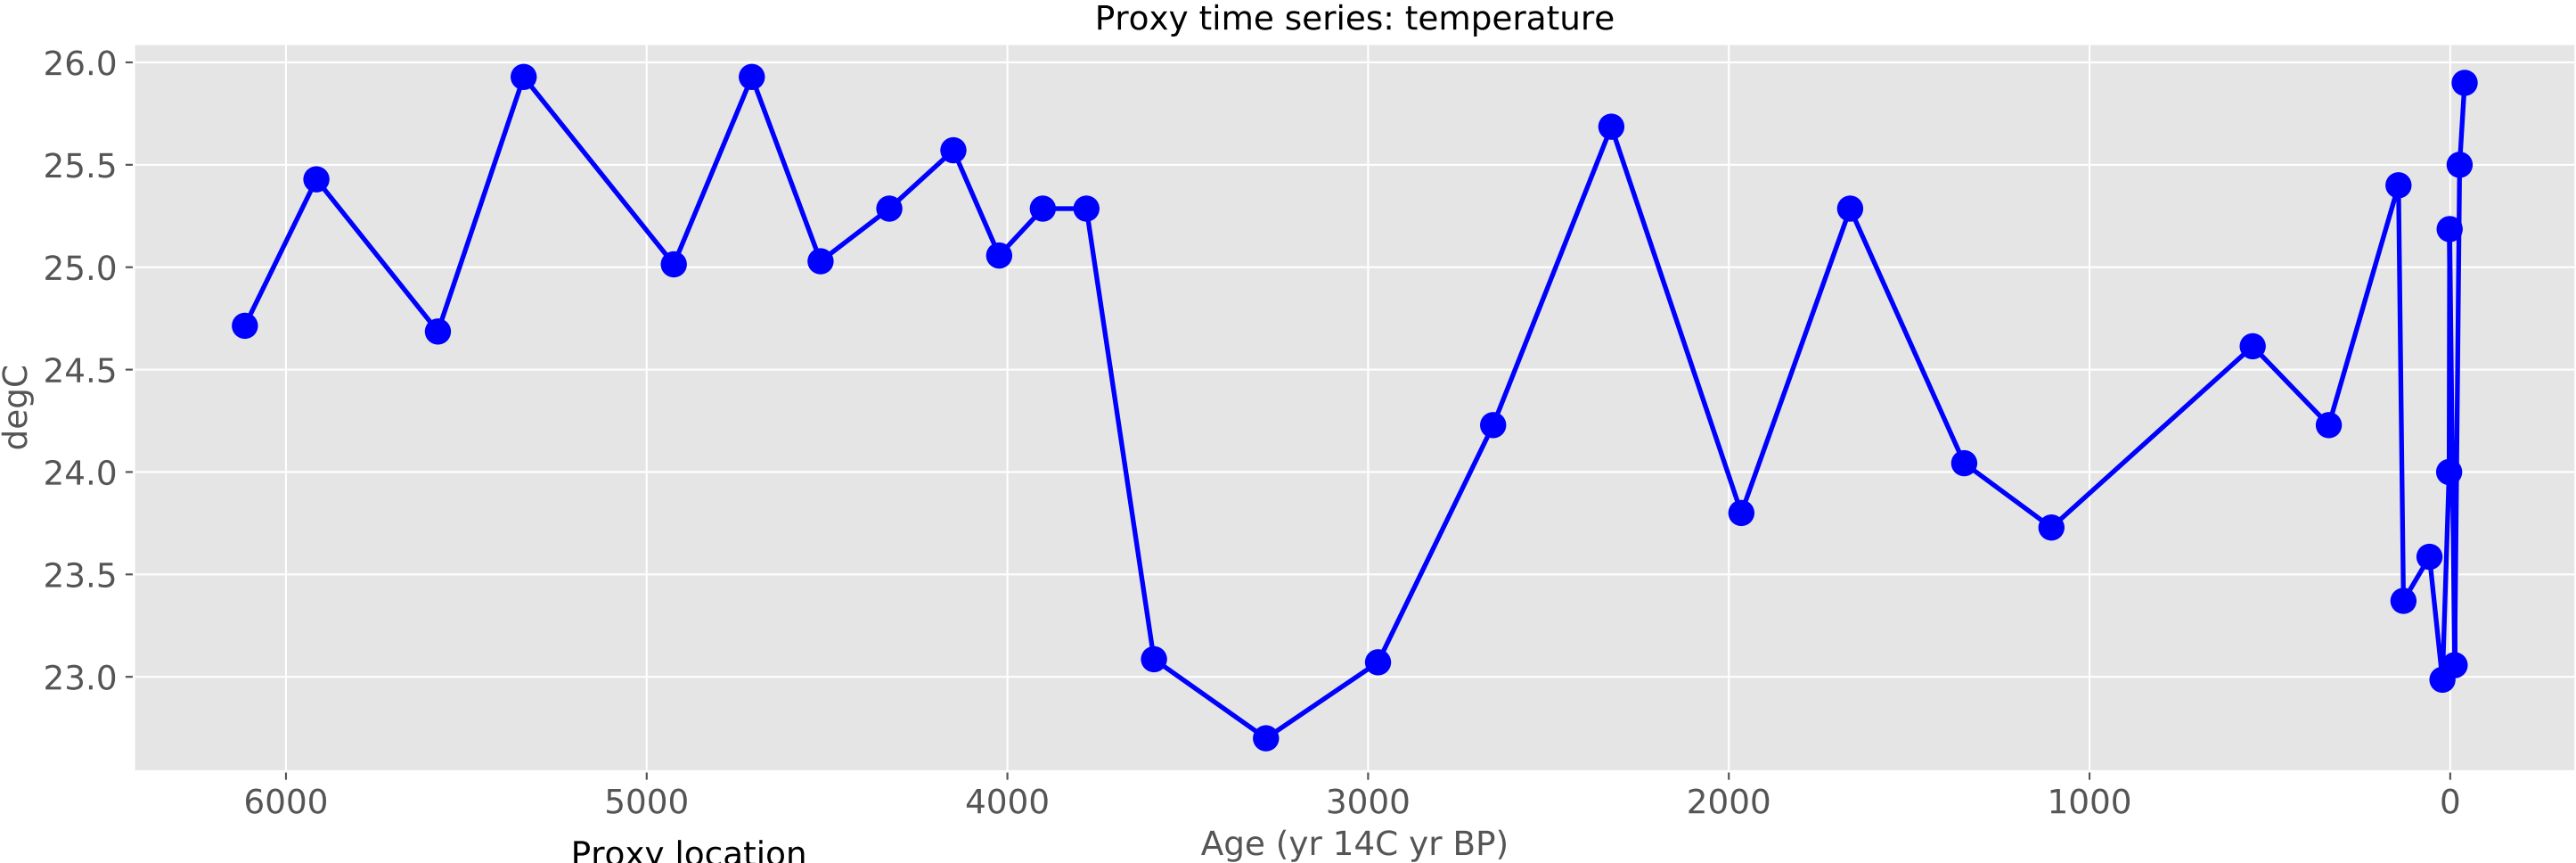

Proxy location  
(33.96 ° N, 119.98 ° W)

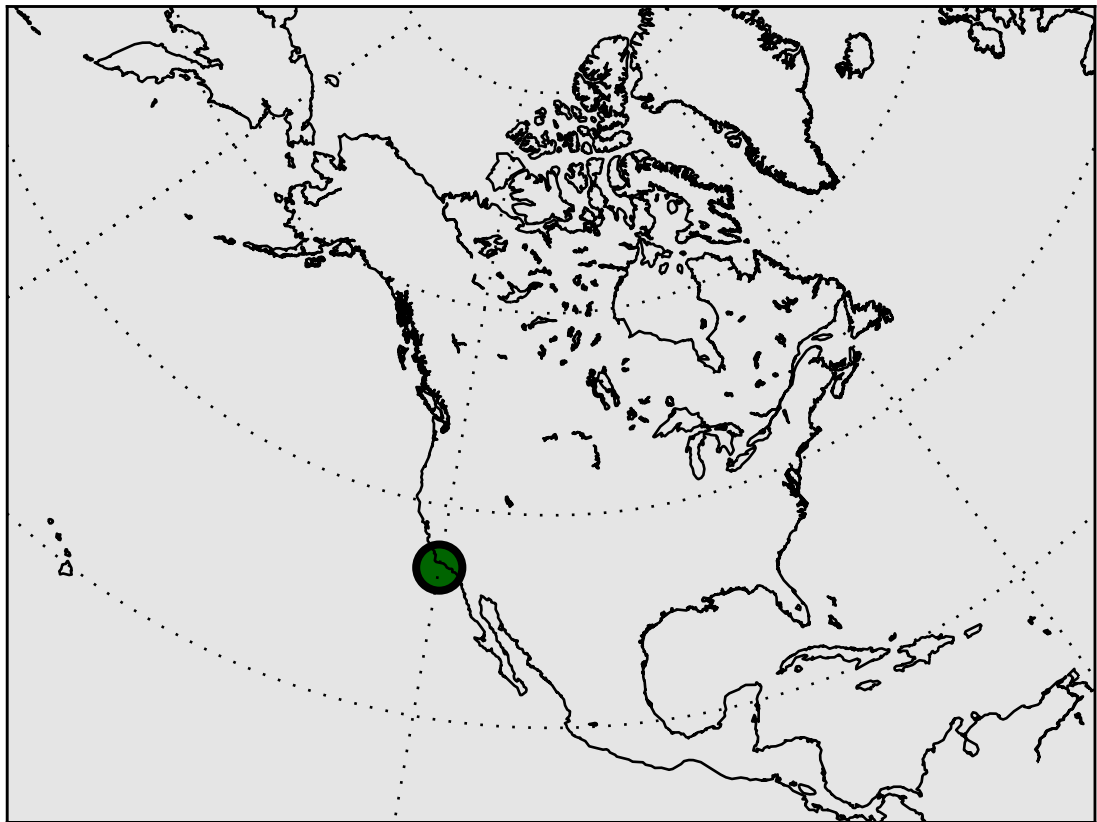

|                    |                                                                                              |
|--------------------|----------------------------------------------------------------------------------------------|
| Dataset name:      | Abalone.Cole.1994                                                                            |
| Archive type:      | LakeSediment                                                                                 |
| Proxy type:        | pollen                                                                                       |
| Variable name:     | temperature                                                                                  |
| Latitude ( ° N):   | 33.96                                                                                        |
| Longitude ( ° E):  | -119.98                                                                                      |
| Elevation (m):     | 0.0                                                                                          |
| Interp. variable:  | T                                                                                            |
| Interp. detail:    | air@surface                                                                                  |
| Interp. season:    | summer+                                                                                      |
| Interp. direction: | positive                                                                                     |
| Pub. 1 title:      | Holocene paleoecology of an estuary on Santa Rosa ...                                        |
| Pub. 1 authors:    | Cole, Kenneth L.; Liu, Geng-Wu                                                               |
| Pub. 1 year:       | 1994                                                                                         |
| Pub. 1 DOI:        | 10.1006/qres.1994.1037                                                                       |
| Original data URL: | <a href="http://www.ncdc.noaa.gov/paleo/study/27330">www.ncdc.noaa.gov/paleo/study/27330</a> |

Proxy data and metadata  
LakeSediment | pollen | Abalone.Cole.1994 | M2Luu75cnkxP

Proxy time series: temperature

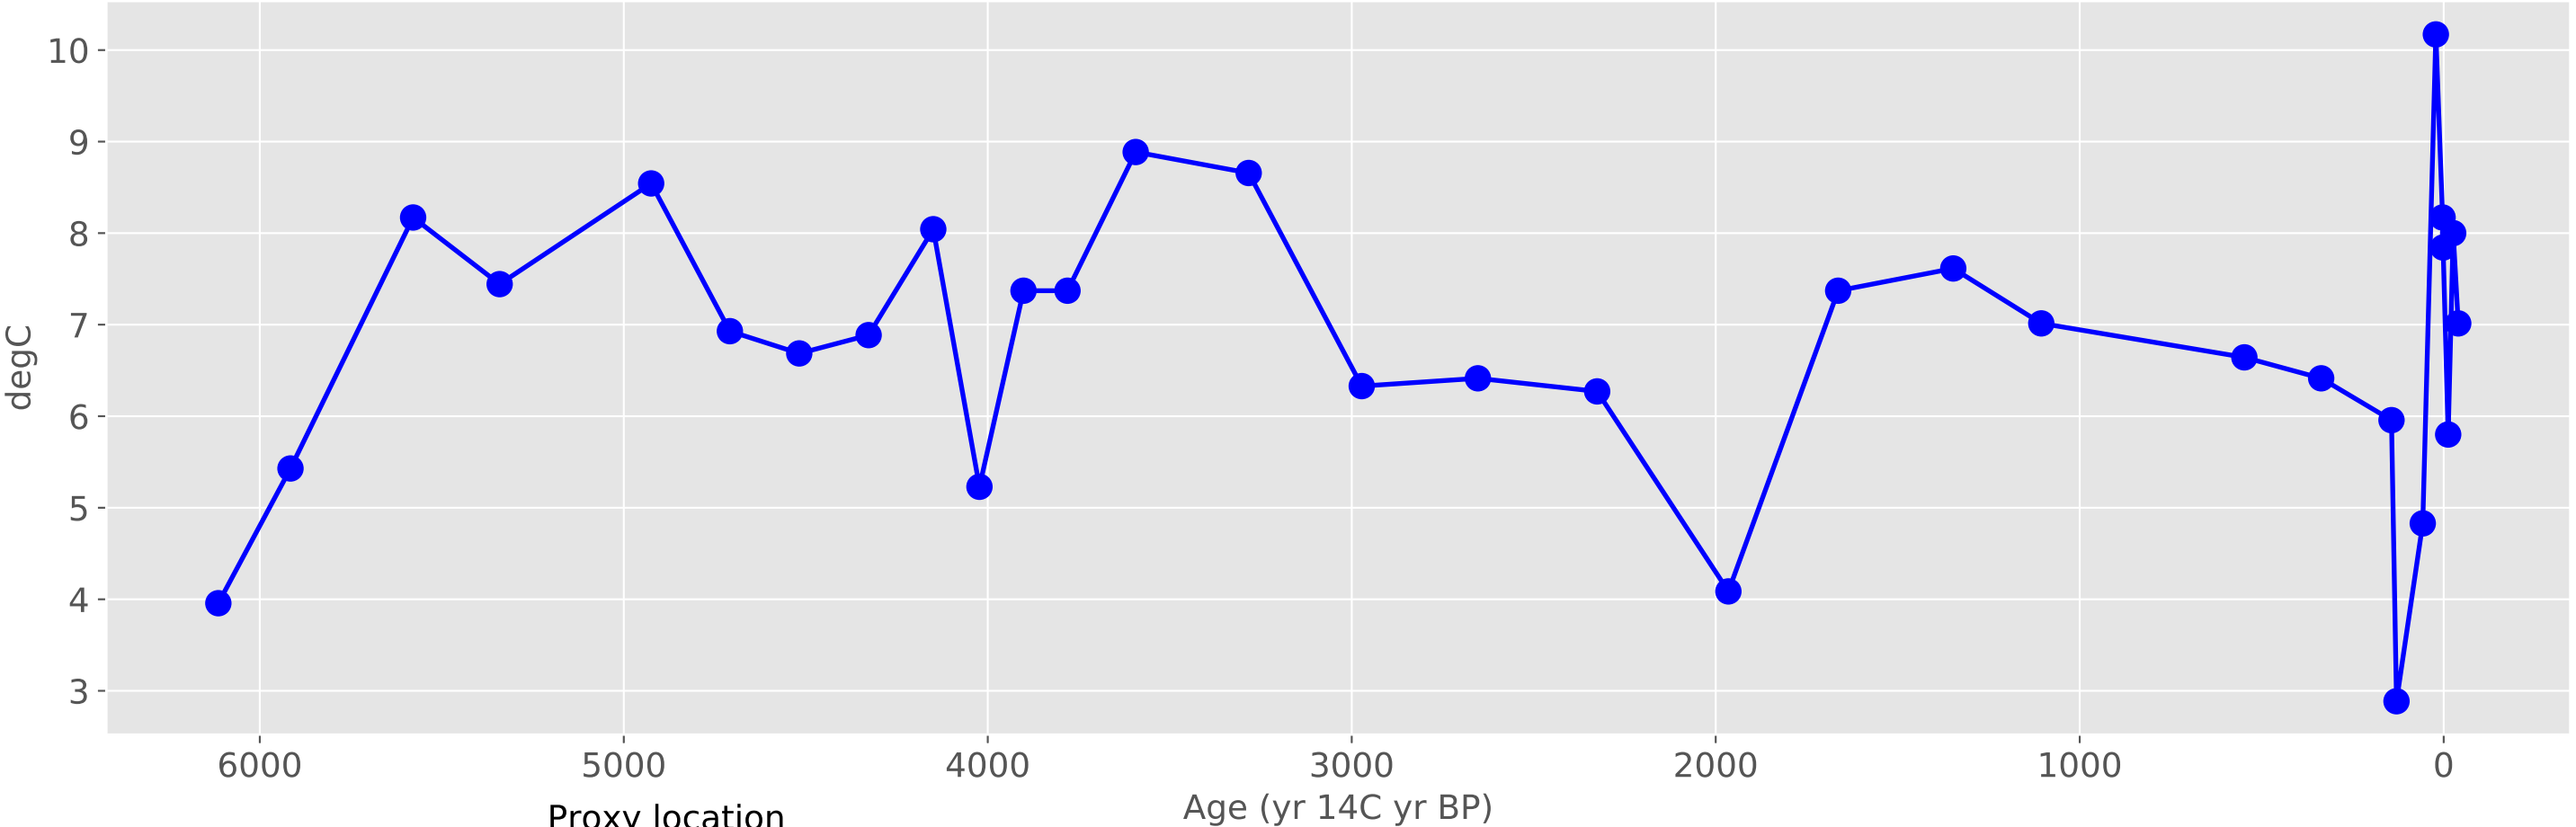

Proxy location  
(33.96 ° N, 119.98 ° W)



|                    |                                                                                              |
|--------------------|----------------------------------------------------------------------------------------------|
| Dataset name:      | Abalone.Cole.1994                                                                            |
| Archive type:      | LakeSediment                                                                                 |
| Proxy type:        | pollen                                                                                       |
| Variable name:     | temperature                                                                                  |
| Latitude ( ° N):   | 33.96                                                                                        |
| Longitude ( ° E):  | -119.98                                                                                      |
| Elevation (m):     | 0.0                                                                                          |
| Interp. variable:  | T                                                                                            |
| Interp. detail:    | air@surface                                                                                  |
| Interp. season:    | winter+                                                                                      |
| Interp. direction: | positive                                                                                     |
| Pub. 1 title:      | Holocene paleoecology of an estuary on Santa Rosa ...                                        |
| Pub. 1 authors:    | Cole, Kenneth L.; Liu, Geng-Wu                                                               |
| Pub. 1 year:       | 1994                                                                                         |
| Pub. 1 DOI:        | 10.1006/qres.1994.1037                                                                       |
| Original data URL: | <a href="http://www.ncdc.noaa.gov/paleo/study/27330">www.ncdc.noaa.gov/paleo/study/27330</a> |

Proxy data and metadata  
**LakeSediment | reflectance | Castor.Nelson.2011 | LPDd7e6276fxb**

Proxy time series: reflectance

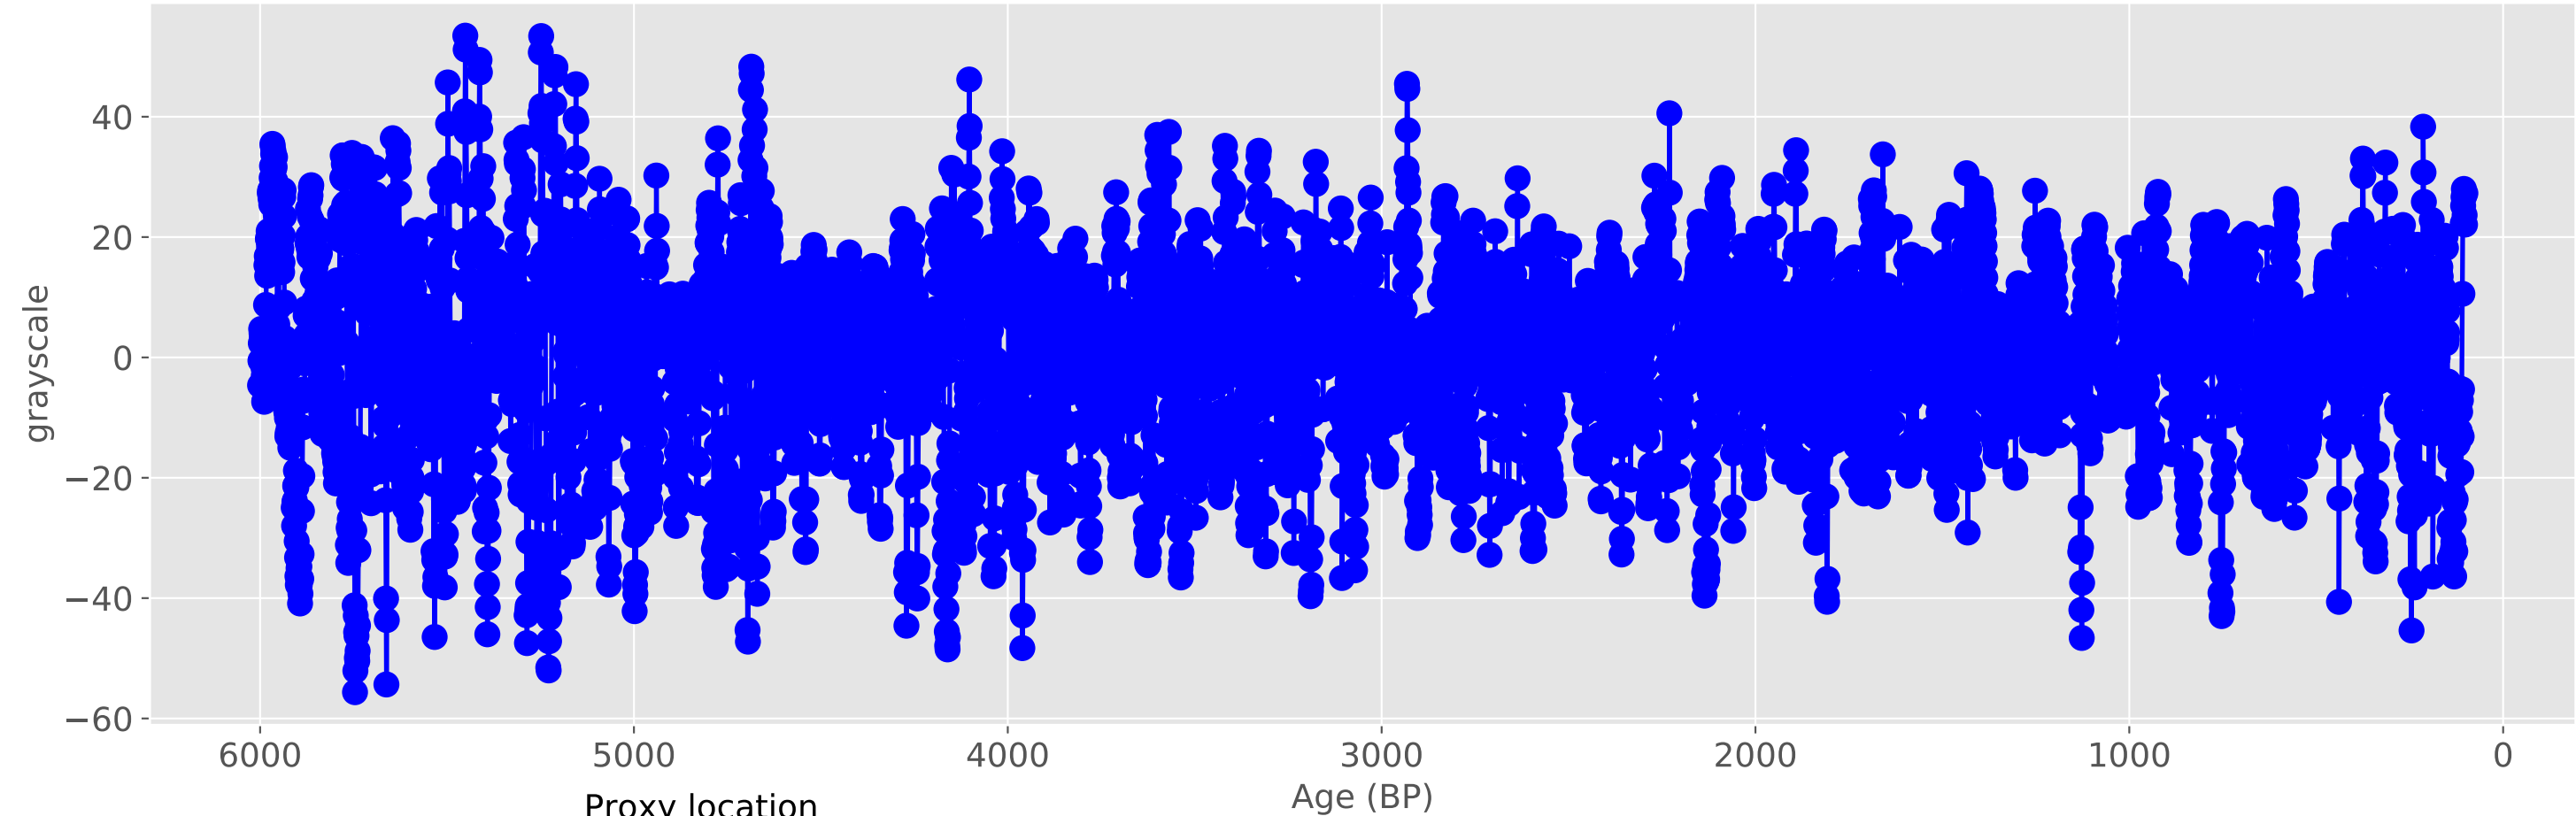

Proxy location  
(48.54 ° N, 119.56 ° W)

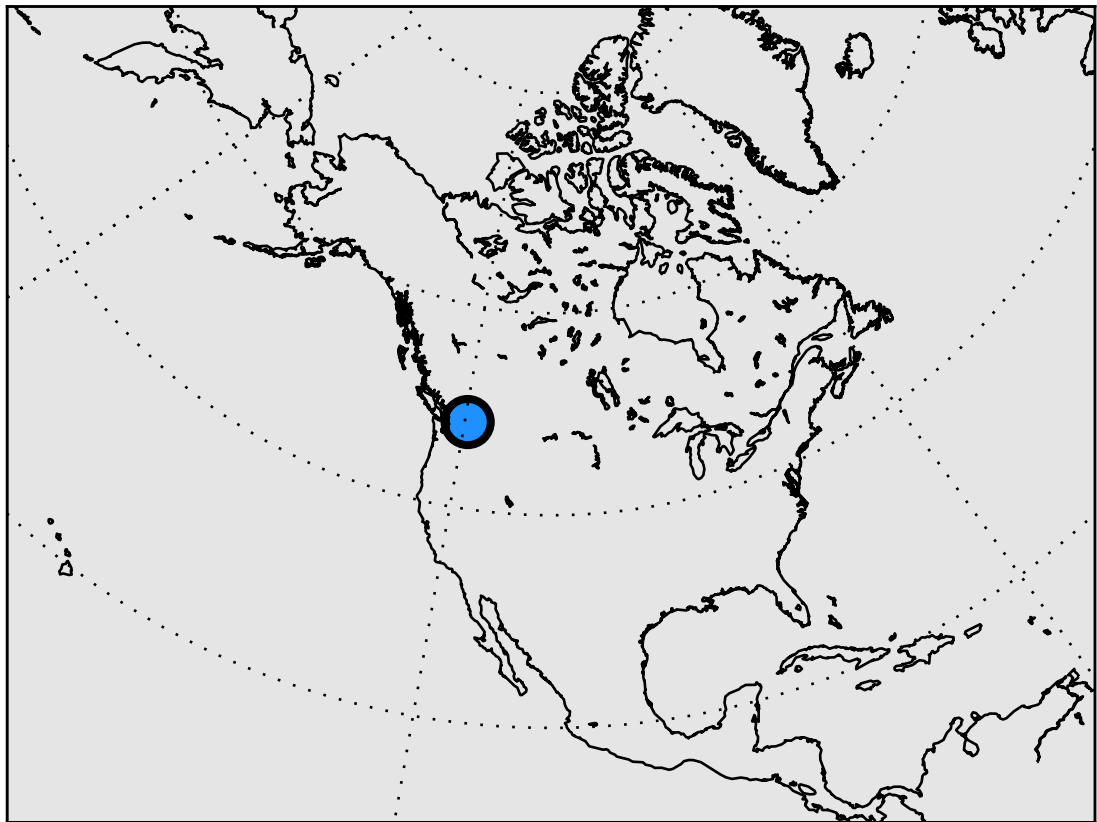

|                    |                                                                                              |
|--------------------|----------------------------------------------------------------------------------------------|
| Dataset name:      | Castor.Nelson.2011                                                                           |
| Archive type:      | LakeSediment                                                                                 |
| Proxy type:        | reflectance                                                                                  |
| Variable name:     | reflectance                                                                                  |
| Latitude ( ° N):   | 48.54                                                                                        |
| Longitude ( ° E):  | -119.56                                                                                      |
| Elevation (m):     | 594.0                                                                                        |
| Interp. variable:  | P-E                                                                                          |
| Interp. detail:    | groundWaterLevel                                                                             |
| Interp. season:    | annual                                                                                       |
| Interp. direction: | negative                                                                                     |
| Pub. 1 title:      | Drought variability in the Pacific Northwest from ...                                        |
| Pub. 1 authors:    | Nelson, D. B.;Abbott, M. B.;Steinman, B.;Polissar,...                                        |
| Pub. 1 year:       | 2011                                                                                         |
| Pub. 1 DOI:        | 10.1073/pnas.1009194108                                                                      |
| Original data URL: | <a href="http://www.ncdc.noaa.gov/paleo/study/10310">www.ncdc.noaa.gov/paleo/study/10310</a> |

Proxy data and metadata  
LakeSediment | S | Chichancanab.Hodell.1995 | GH047d0e2d

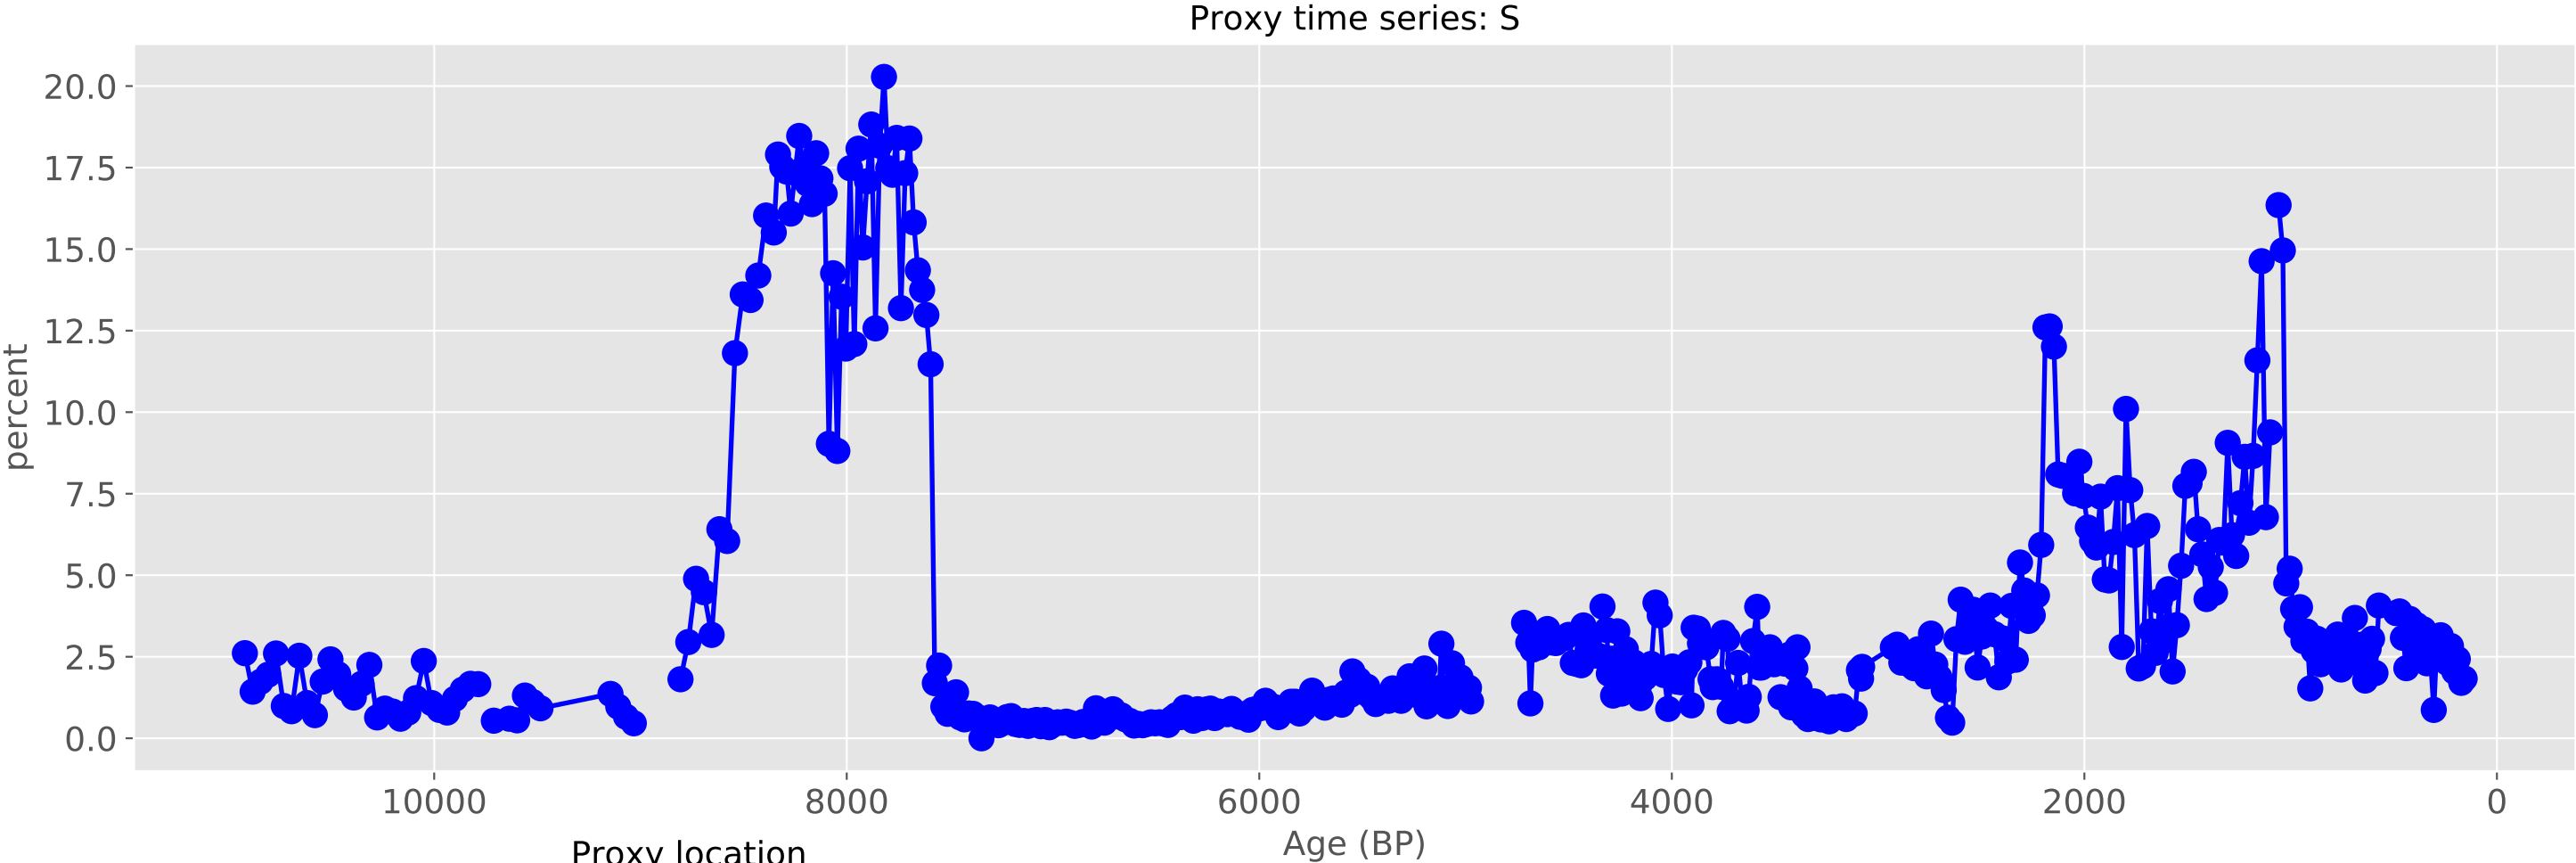

Proxy location  
(19.83 ° N, 88.75 ° W)

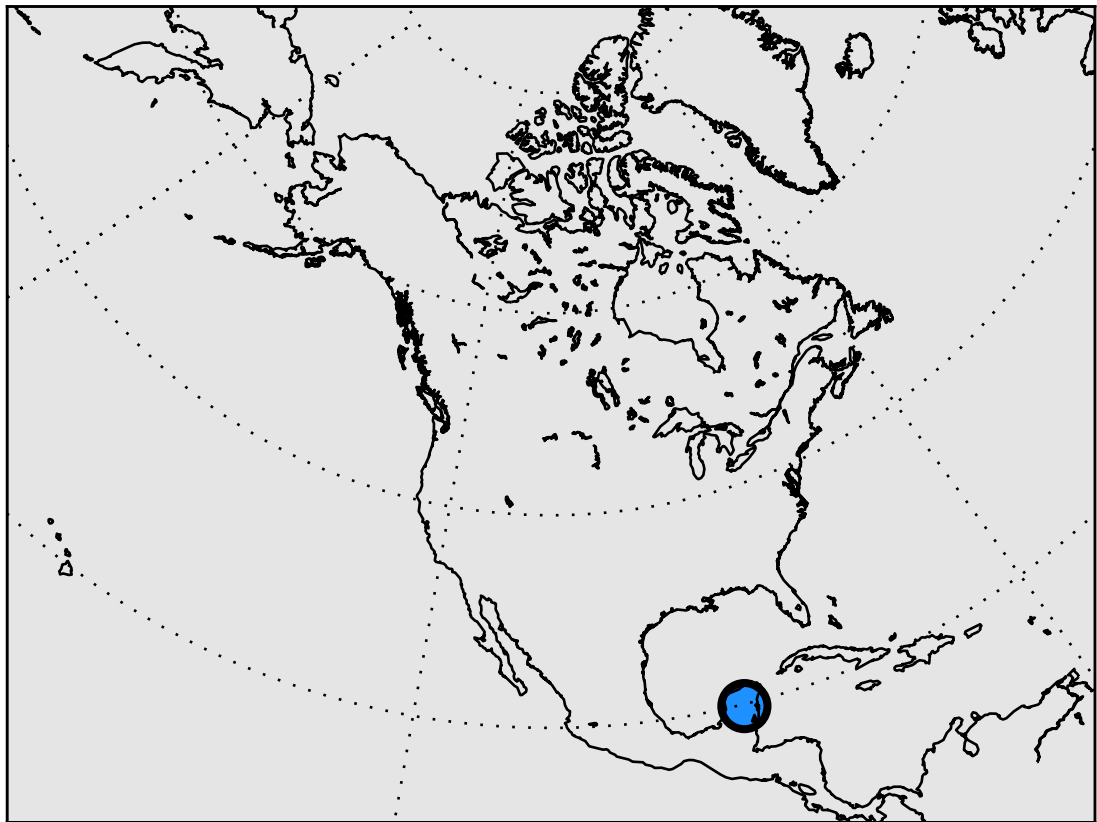

|                    |                                                                                            |
|--------------------|--------------------------------------------------------------------------------------------|
| Dataset name:      | Chichancanab.Hodell.1995                                                                   |
| Archive type:      | LakeSediment                                                                               |
| Proxy type:        | S                                                                                          |
| Variable name:     | S                                                                                          |
| Latitude ( ° N):   | 19.8333                                                                                    |
| Longitude ( ° E):  | -88.75                                                                                     |
| Elevation (m):     | 3.0                                                                                        |
| Interp. variable:  | P-E                                                                                        |
| Interp. detail:    | lake@surface                                                                               |
| Interp. season:    | summerOnly                                                                                 |
| Interp. direction: | positive                                                                                   |
| Pub. 1 title:      | Possible role of climate in the collapse of Classi...                                      |
| Pub. 1 authors:    | Hodell, David A.;Curtis, Jason H.;Brenner, Mark                                            |
| Pub. 1 year:       | 1995                                                                                       |
| Pub. 1 DOI:        | 10.1038/375391a0                                                                           |
| Original data URL: | <a href="http://www.ncdc.noaa.gov/paleo/study/5483">www.ncdc.noaa.gov/paleo/study/5483</a> |

Proxy data and metadata  
**LakeSediment | stratigraphy | RainbowLake.Shuman.2016 | GH3c165b1c**

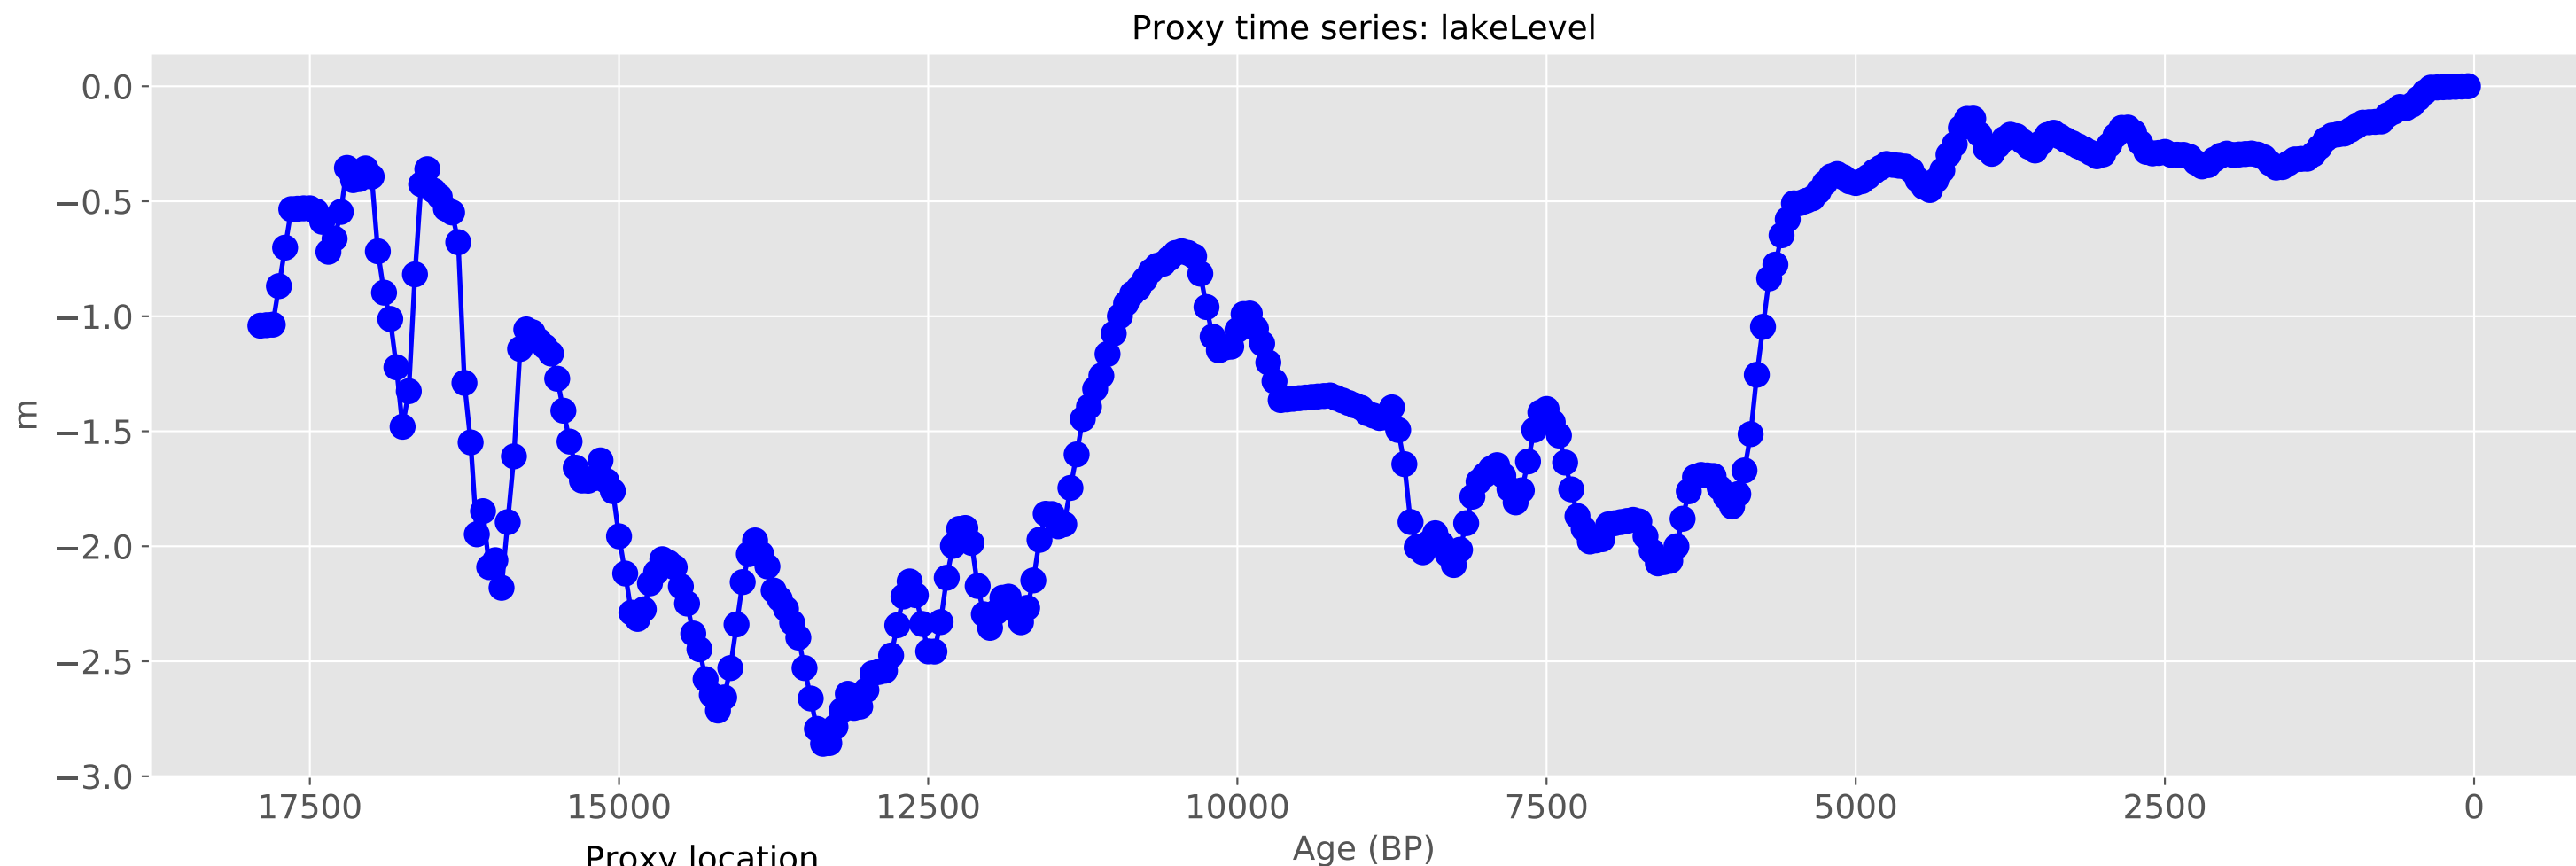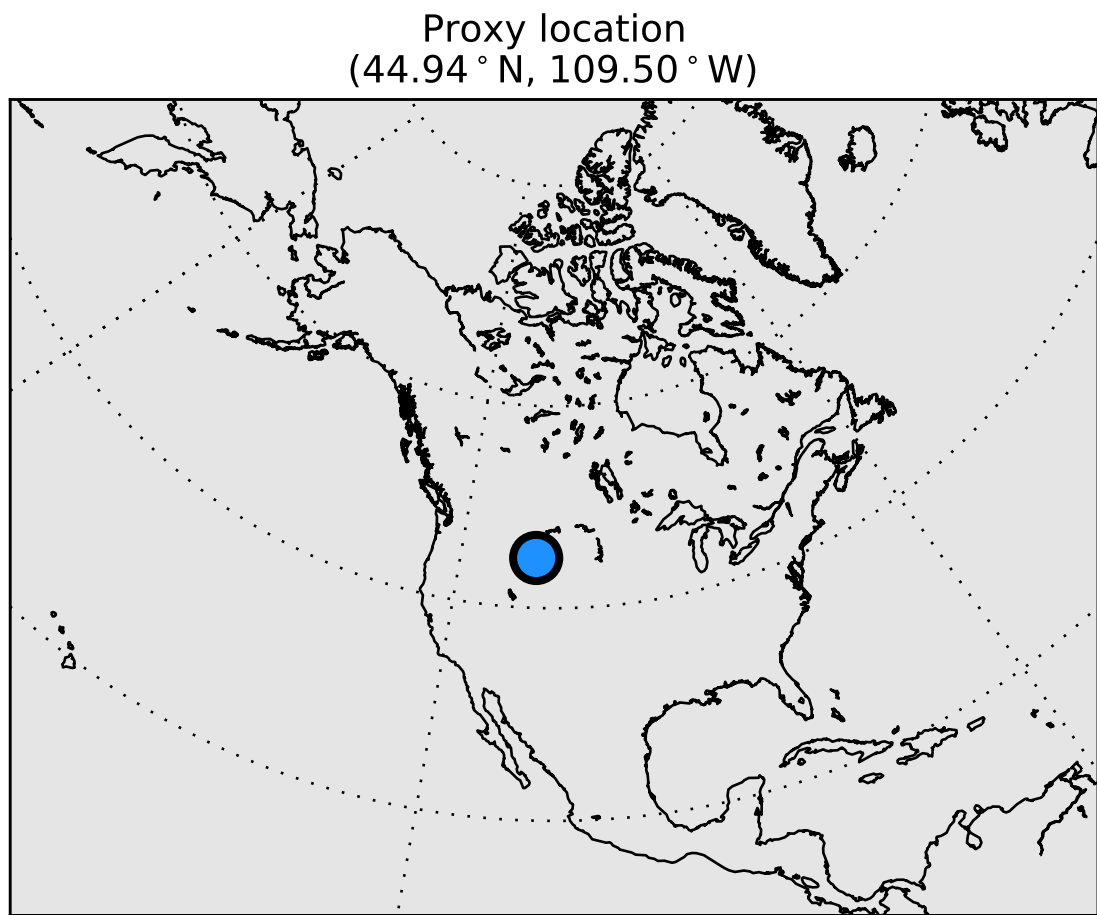

|                    |                                                       |
|--------------------|-------------------------------------------------------|
| Dataset name:      | RainbowLake.Shuman.2016                               |
| Archive type:      | LakeSediment                                          |
| Proxy type:        | stratigraphy                                          |
| Variable name:     | lakeLevel                                             |
| Latitude ( ° N):   | 44.94                                                 |
| Longitude ( ° E):  | -109.5                                                |
| Elevation (m):     | 2960.0                                                |
| Interp. variable:  | P-E                                                   |
| Interp. detail:    | lakeLevel@surface                                     |
| Interp. season:    | annual                                                |
| Interp. direction: | positive                                              |
| Pub. 1 title:      | The structure of Holocene climate change in mid-la... |
| Pub. 1 authors:    | Shuman, Bryan N.; Marsicek, Jeremiah                  |
| Pub. 1 year:       | 2016                                                  |
| Pub. 1 DOI:        | 10.1016/j.quascirev.2016.03.009                       |
| Original data URL: | wNA                                                   |



Proxy data and metadata  
LakeSediment | stratigraphy | LakeOfTheWoods.Pribyl.2014 | GH20782a02

Proxy time series: lakeLevel

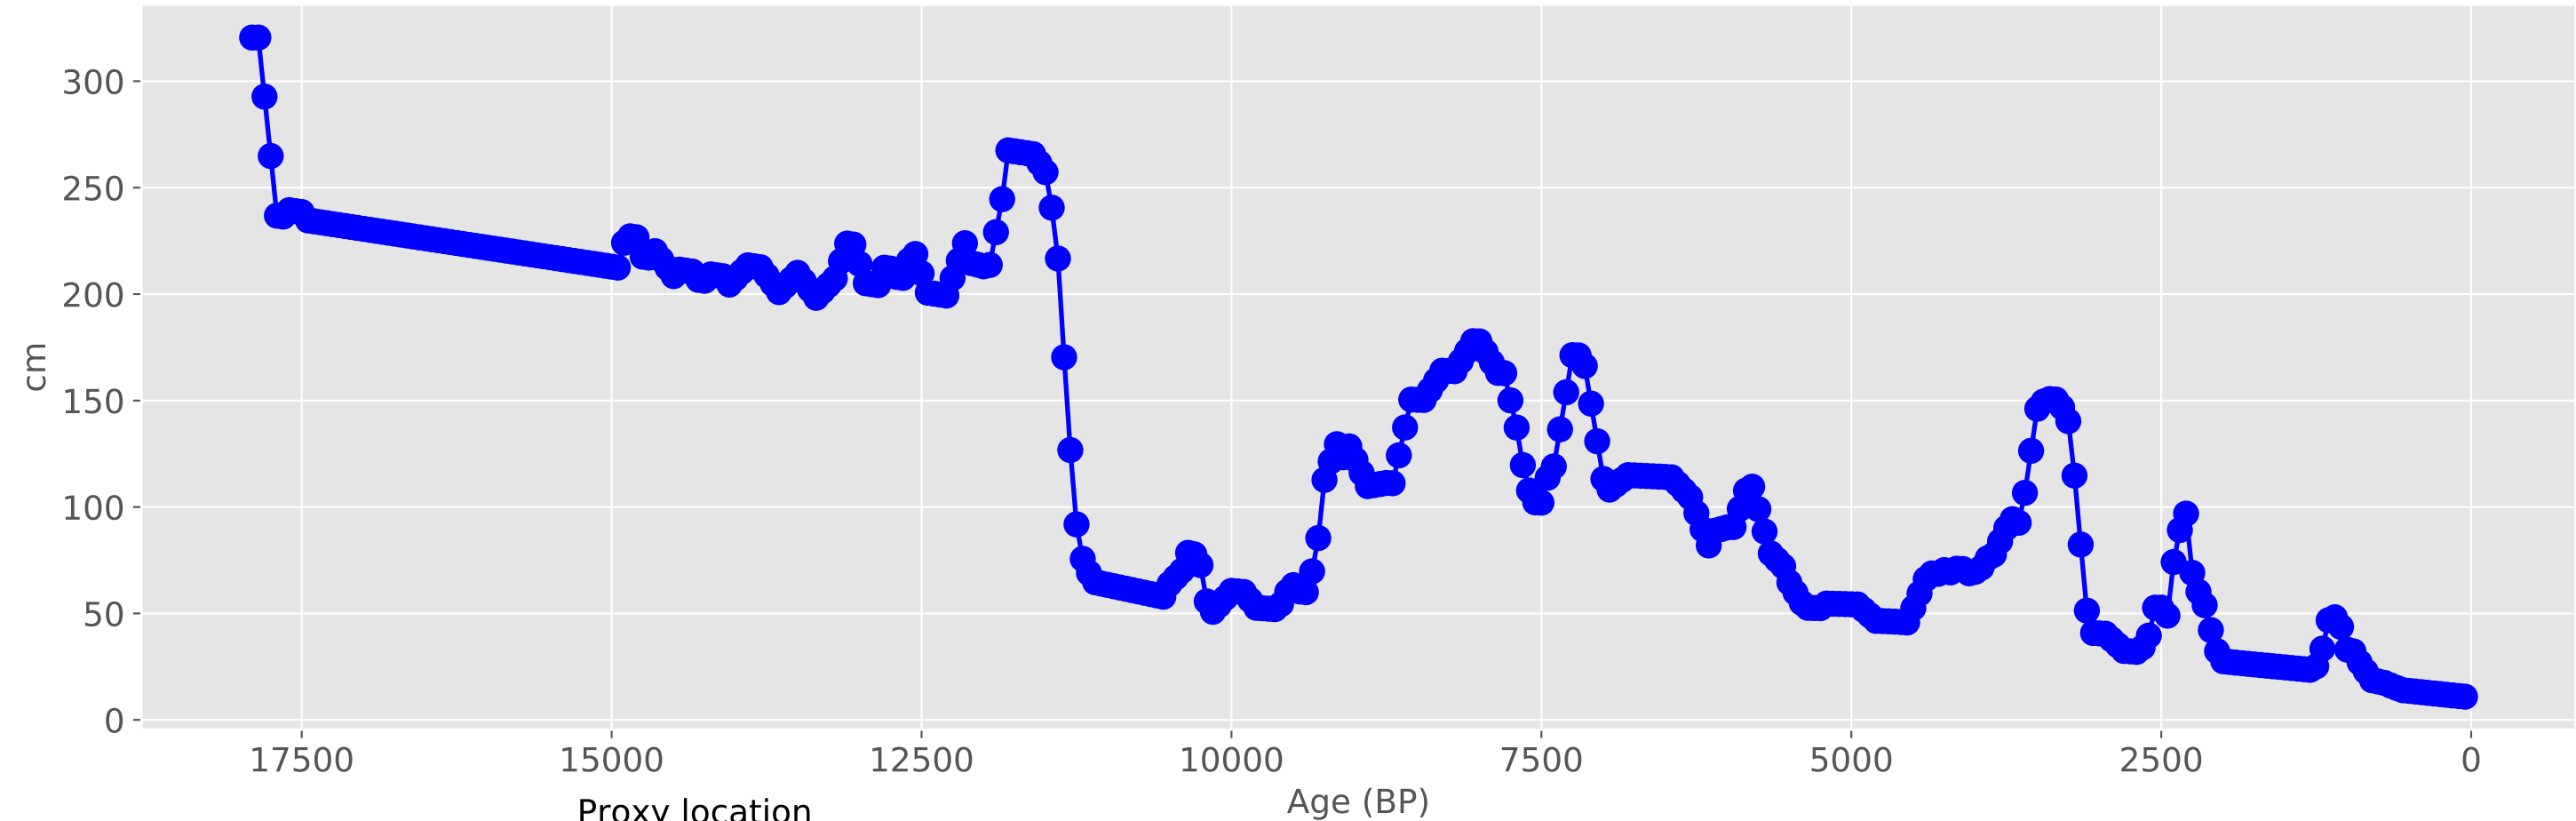

Proxy location  
(43.48 ° N, 109.89 ° W)

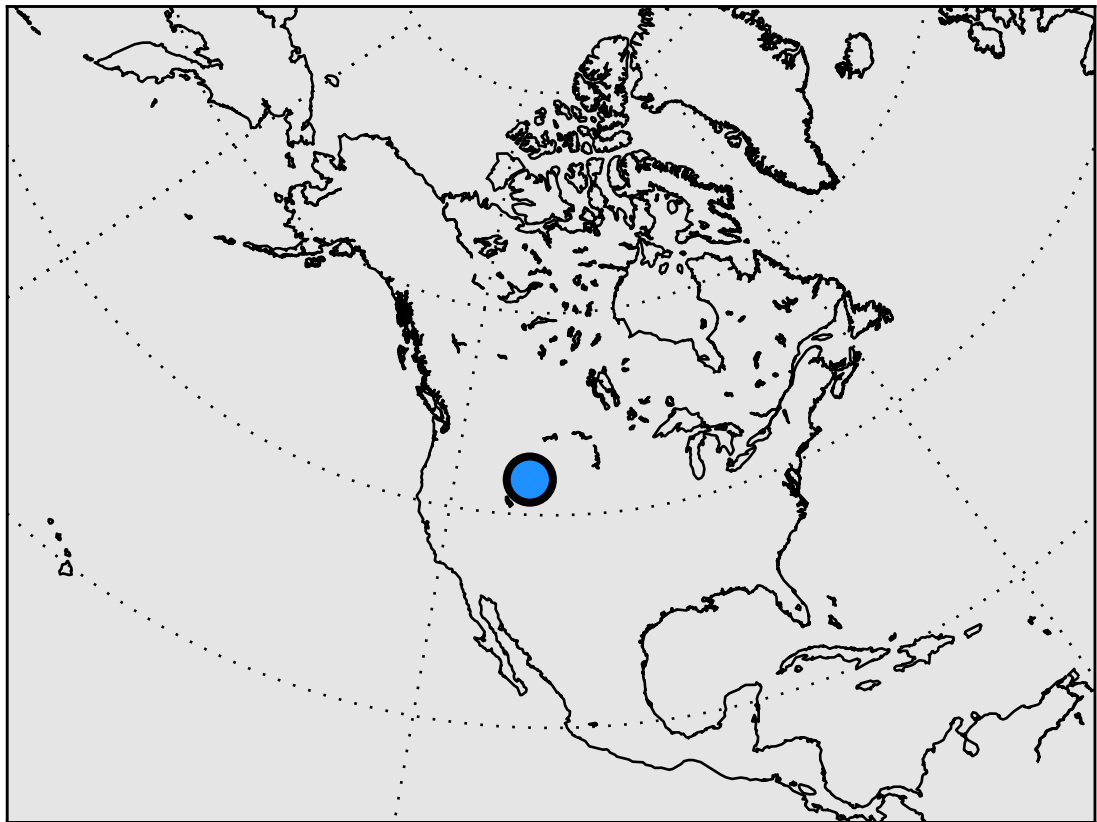

|                    |                                                       |
|--------------------|-------------------------------------------------------|
| Dataset name:      | LakeOfTheWoods.Pribyl.2014                            |
| Archive type:      | LakeSediment                                          |
| Proxy type:        | stratigraphy                                          |
| Variable name:     | lakeLevel                                             |
| Latitude ( ° N):   | 43.4822                                               |
| Longitude ( ° E):  | -109.8933                                             |
| Elevation (m):     | 2820.0                                                |
| Interp. variable:  | P-E                                                   |
| Interp. detail:    | lakeLevel@surface                                     |
| Interp. season:    | annual                                                |
| Interp. direction: | negative                                              |
| Pub. 1 title:      | A computational approach to Quaternary lake-level ... |
| Pub. 1 authors:    | Pribyl, Paul                                          |
| Pub. 1 year:       | 2014                                                  |
| Pub. 1 DOI:        | 10.1016/j.yqres.2014.01.012                           |
| Original data URL: | wNAm                                                  |

Proxy data and metadata

LakeSediment | stratigraphy | LittleWindy.Minckley.2012 | GHeCa74745

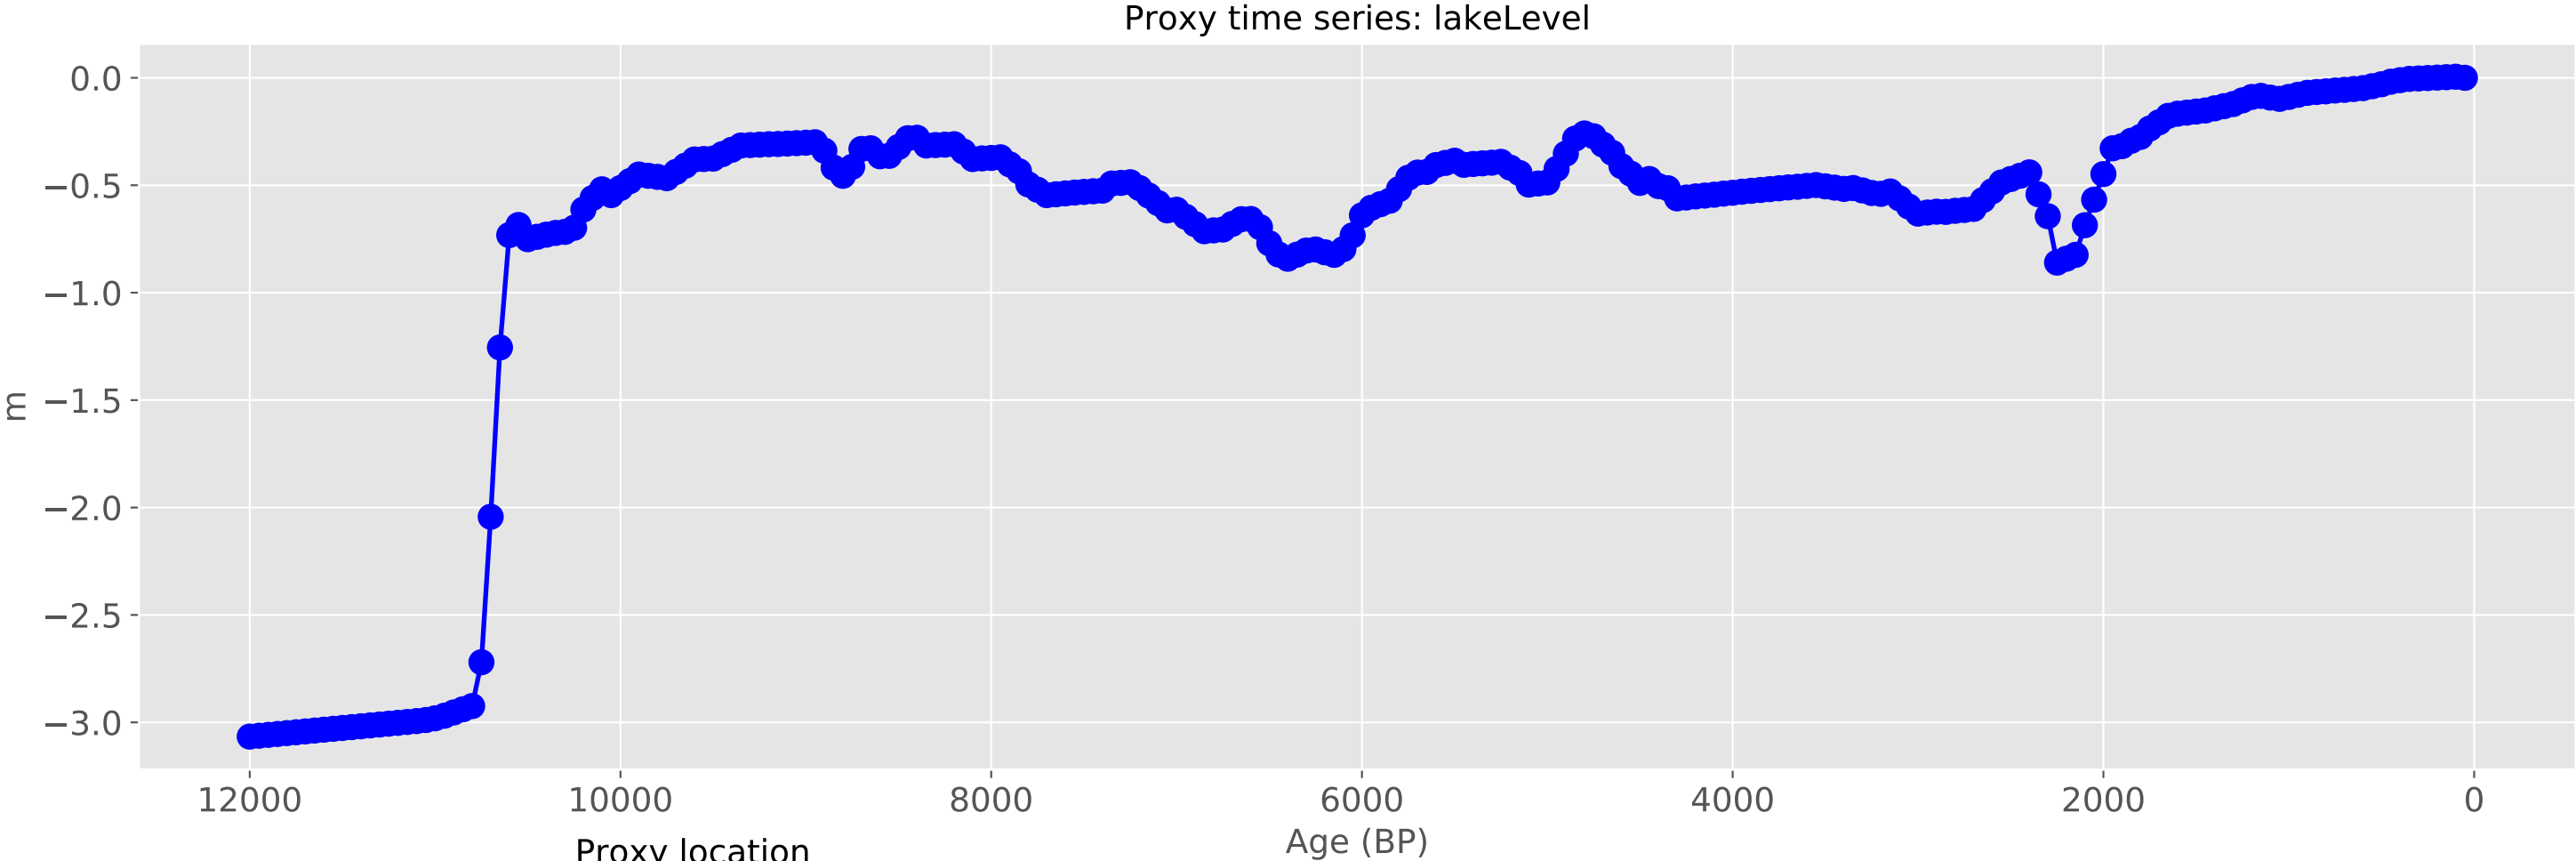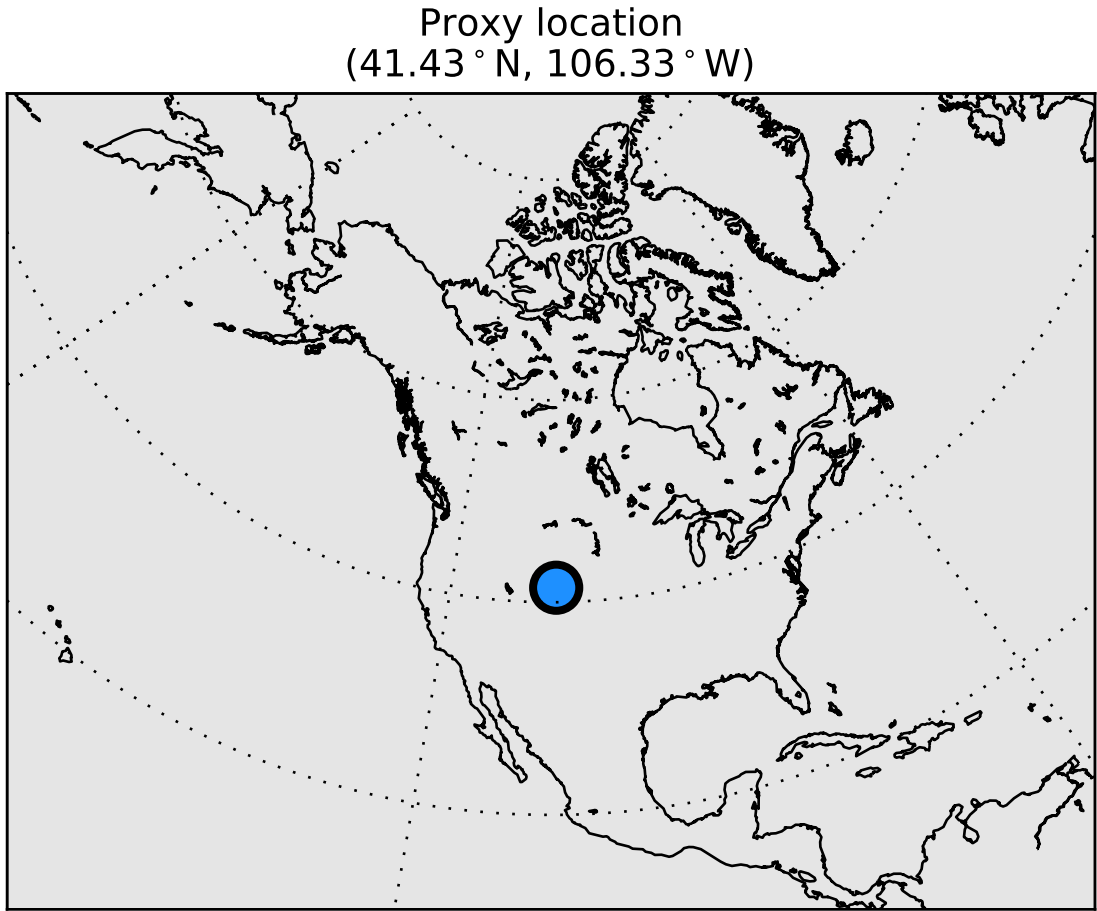

|                    |                                                                                              |
|--------------------|----------------------------------------------------------------------------------------------|
| Dataset name:      | LittleWindy.Minckley.2012                                                                    |
| Archive type:      | LakeSediment                                                                                 |
| Proxy type:        | stratigraphy                                                                                 |
| Variable name:     | lakeLevel                                                                                    |
| Latitude ( ° N):   | 41.43                                                                                        |
| Longitude ( ° E):  | -106.33                                                                                      |
| Elevation (m):     | 2983.0                                                                                       |
| Interp. variable:  | P-E                                                                                          |
| Interp. detail:    | lakeLevel@surface                                                                            |
| Interp. season:    | annual                                                                                       |
| Interp. direction: | positive                                                                                     |
| Pub. 1 title:      | Resilience and regime change in a southern Rocky M...                                        |
| Pub. 1 authors:    | Minckley, T. A.;Shriver, R. K.;Shuman, B                                                     |
| Pub. 1 year:       | 2012                                                                                         |
| Pub. 1 DOI:        | 10.1890/11-0283.1                                                                            |
| Original data URL: | <a href="http://www.ncdc.noaa.gov/paleo/study/16096">www.ncdc.noaa.gov/paleo/study/16096</a> |

Proxy data and metadata

LakeSediment | stratigraphy | UpperBigCreek.Shuman.2015 | GH7a79d6b2

Proxy time series: lakeLevel

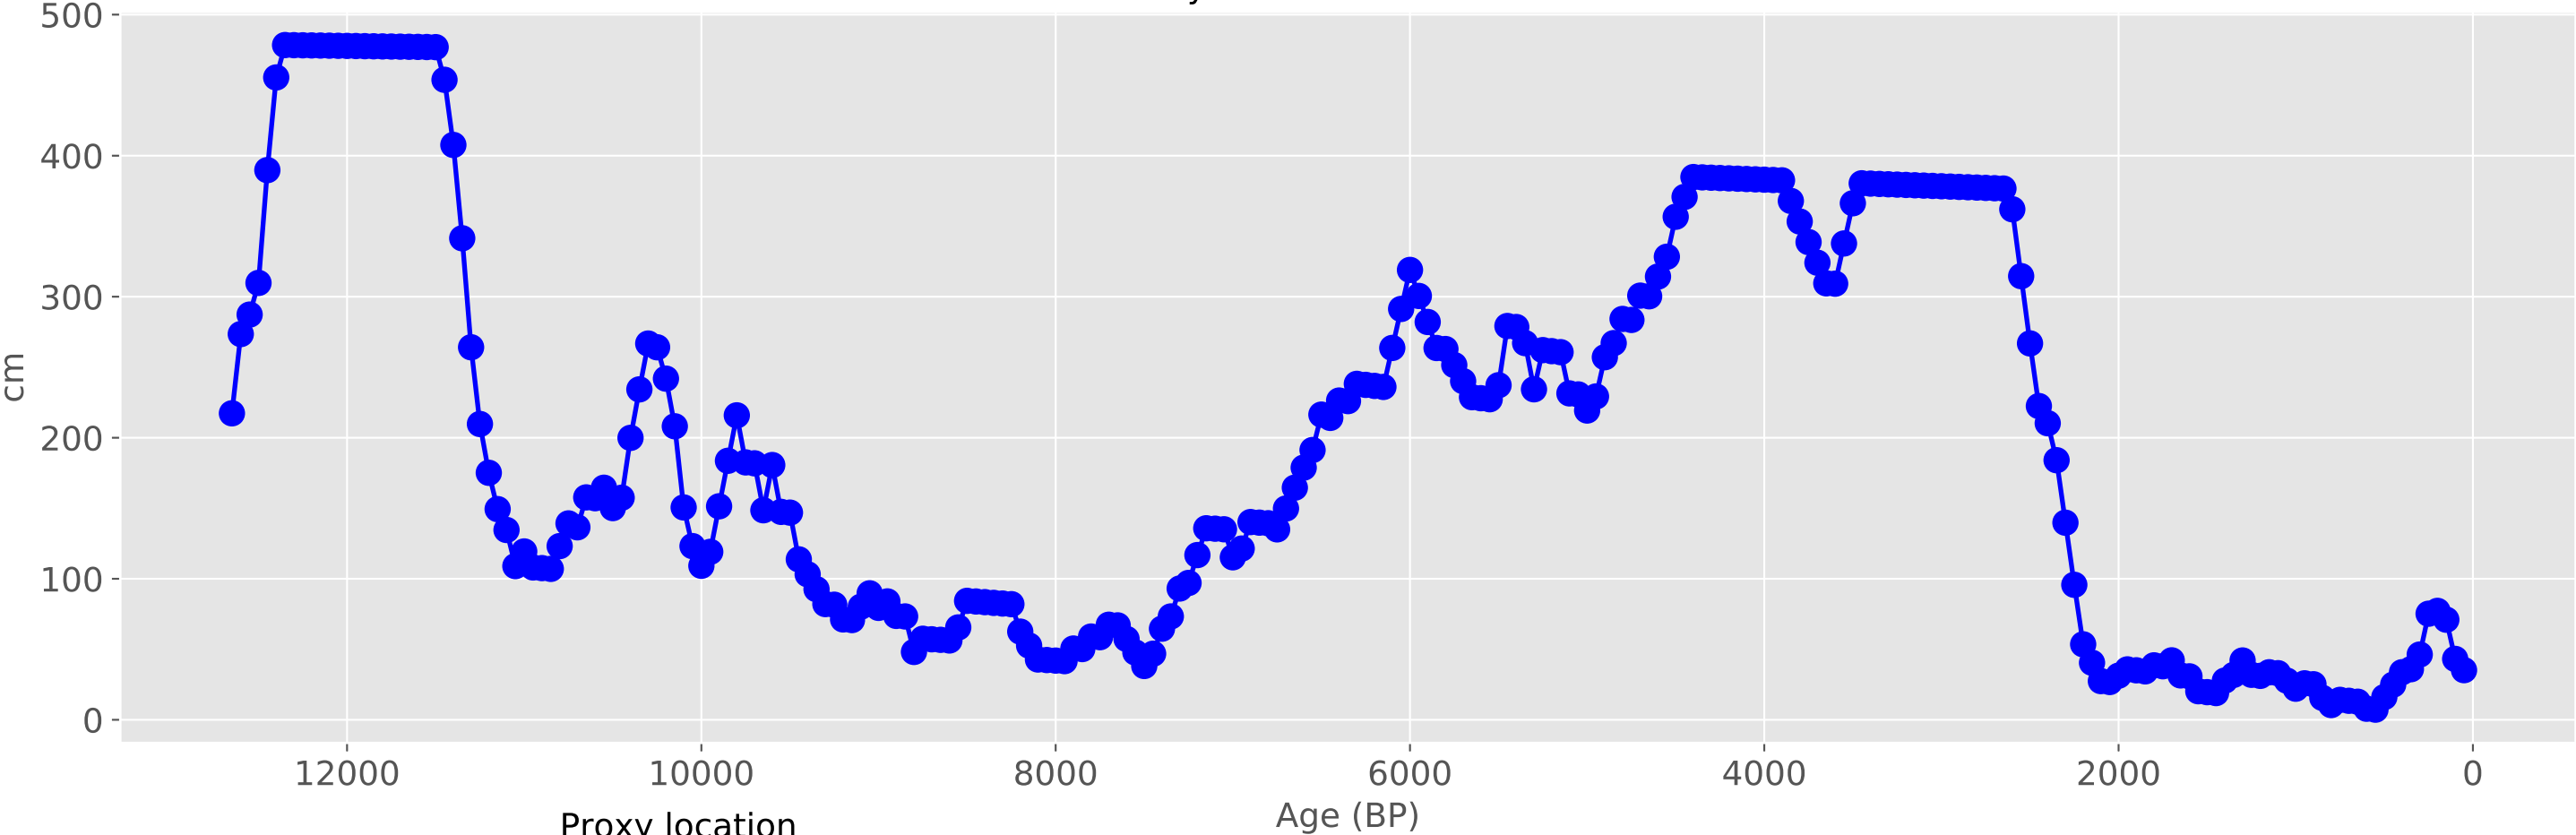

Proxy location  
(40.91 ° N, 106.62 ° W)

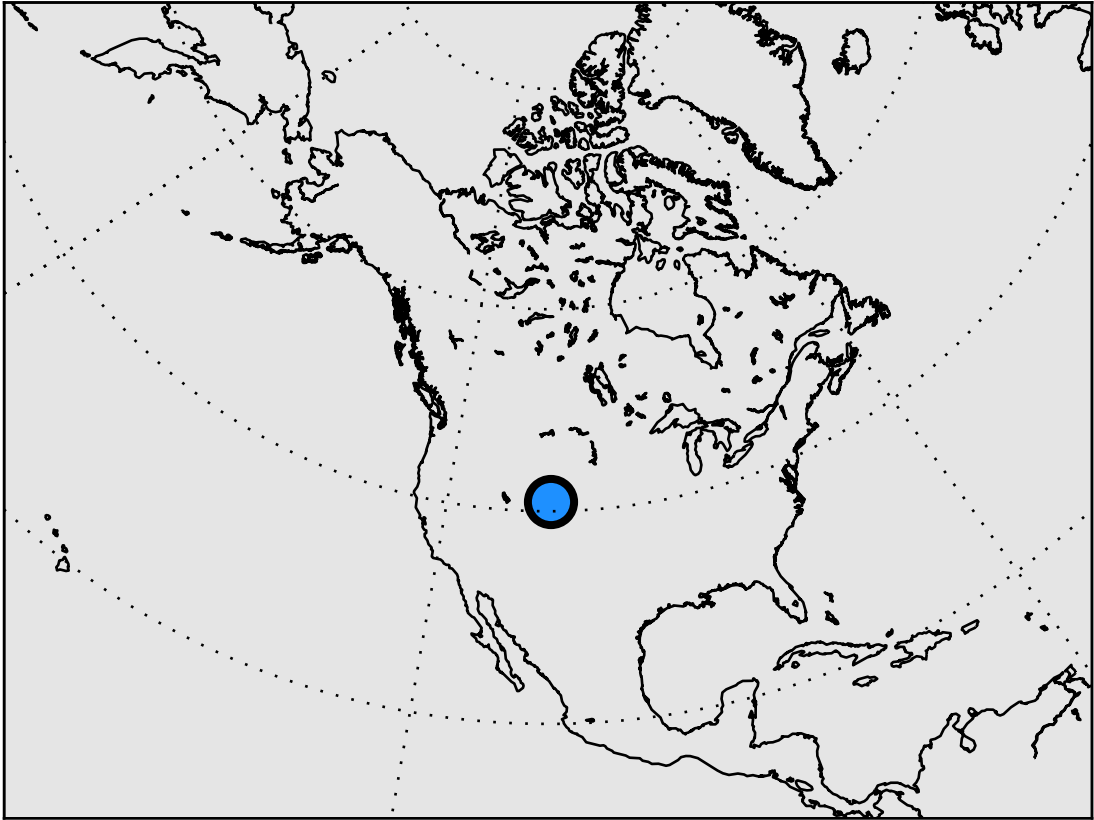

|                    |                                                       |
|--------------------|-------------------------------------------------------|
| Dataset name:      | UpperBigCreek.Shuman.2015                             |
| Archive type:      | LakeSediment                                          |
| Proxy type:        | stratigraphy                                          |
| Variable name:     | lakeLevel                                             |
| Latitude ( ° N):   | 40.91                                                 |
| Longitude ( ° E):  | -106.62                                               |
| Elevation (m):     | 2750.0                                                |
| Interp. variable:  | P-E                                                   |
| Interp. detail:    | lakeLevel@surface                                     |
| Interp. season:    | annual                                                |
| Interp. direction: | negative                                              |
| Pub. 1 title:      | Hydrologic changes in Colorado during the mid-Holo... |
| Pub. 1 authors:    | Shuman, Bryan N.;Pribyl, Paul;Buettner, Jacob         |
| Pub. 1 year:       | 2015                                                  |
| Pub. 1 DOI:        | 10.1016/j.yqres.2015.07.004                           |
| Original data URL: | wNA                                                   |

Proxy data and metadata

LakeSediment | stratigraphy | HiddenLakeCO.Shuman.2009 | GHf7751317

Proxy time series: lakeLevel

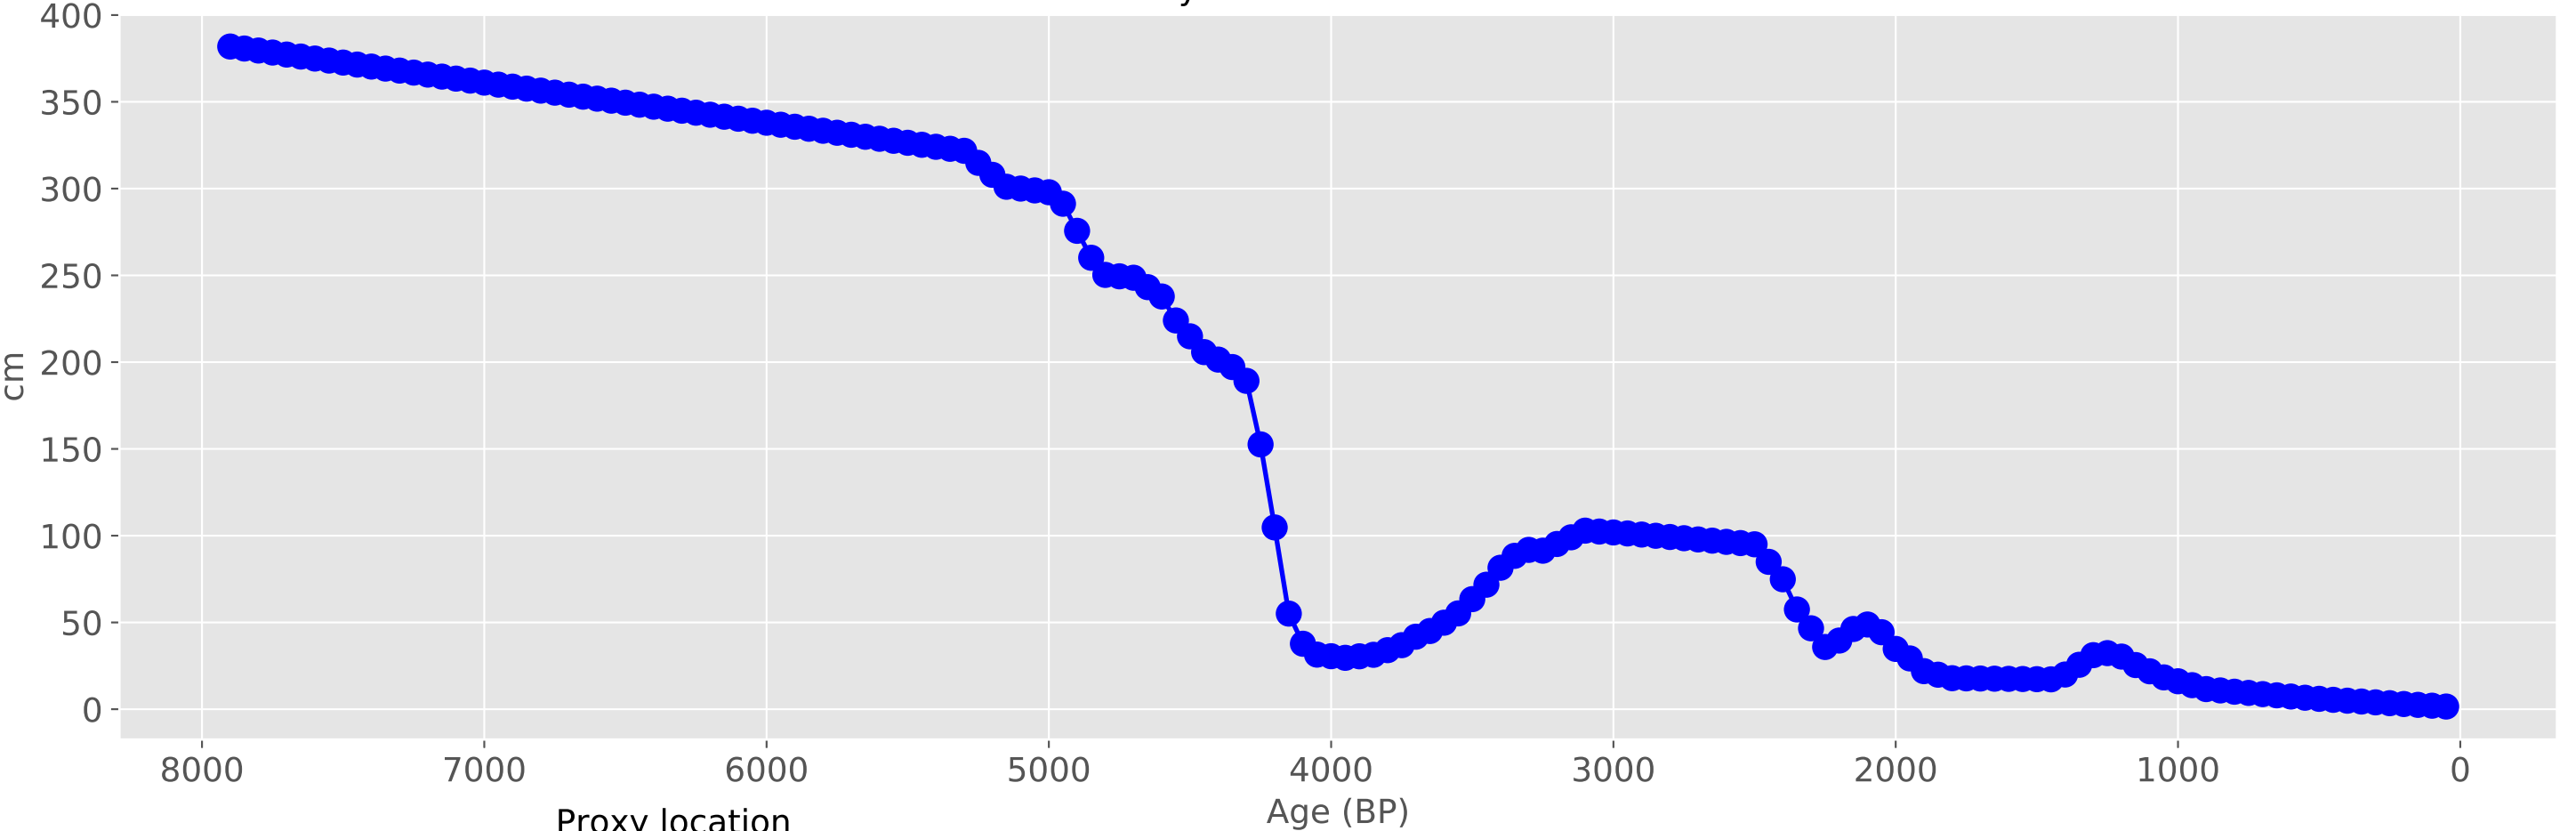

Proxy location  
(40.51 ° N, 106.61 ° W)

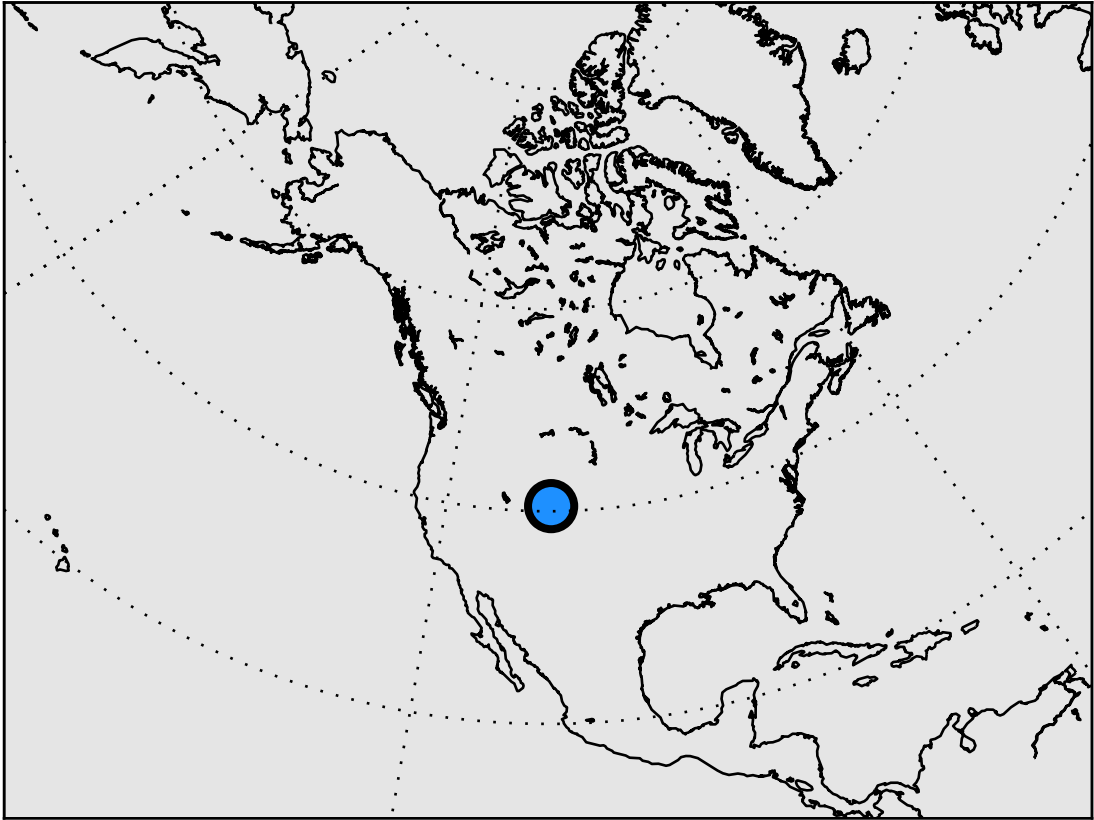

|                    |                                                                                              |
|--------------------|----------------------------------------------------------------------------------------------|
| Dataset name:      | HiddenLakeCO.Shuman.2009                                                                     |
| Archive type:      | LakeSediment                                                                                 |
| Proxy type:        | stratigraphy                                                                                 |
| Variable name:     | lakeLevel                                                                                    |
| Latitude ( ° N):   | 40.505                                                                                       |
| Longitude ( ° E):  | -106.607                                                                                     |
| Elevation (m):     | 2708.0                                                                                       |
| Interp. variable:  | P-E                                                                                          |
| Interp. detail:    | lakeLevel@surface                                                                            |
| Interp. season:    | annual                                                                                       |
| Interp. direction: | negative                                                                                     |
| Pub. 1 title:      | Holocene lake-level trends in the Rocky Mountains,...                                        |
| Pub. 1 authors:    | Shuman, Bryan;Henderson, Anna K.;Colman, Steven M....                                        |
| Pub. 1 year:       | 2009                                                                                         |
| Pub. 1 DOI:        | 10.1016/j.quascirev.2009.03.003                                                              |
| Original data URL: | <a href="http://www.ncdc.noaa.gov/paleo/study/23077">www.ncdc.noaa.gov/paleo/study/23077</a> |

Proxy data and metadata  
**LakeSediment | stratigraphy | Emerald.Shuman.2014 | GHa731d22a**

Proxy time series: lakeLevel

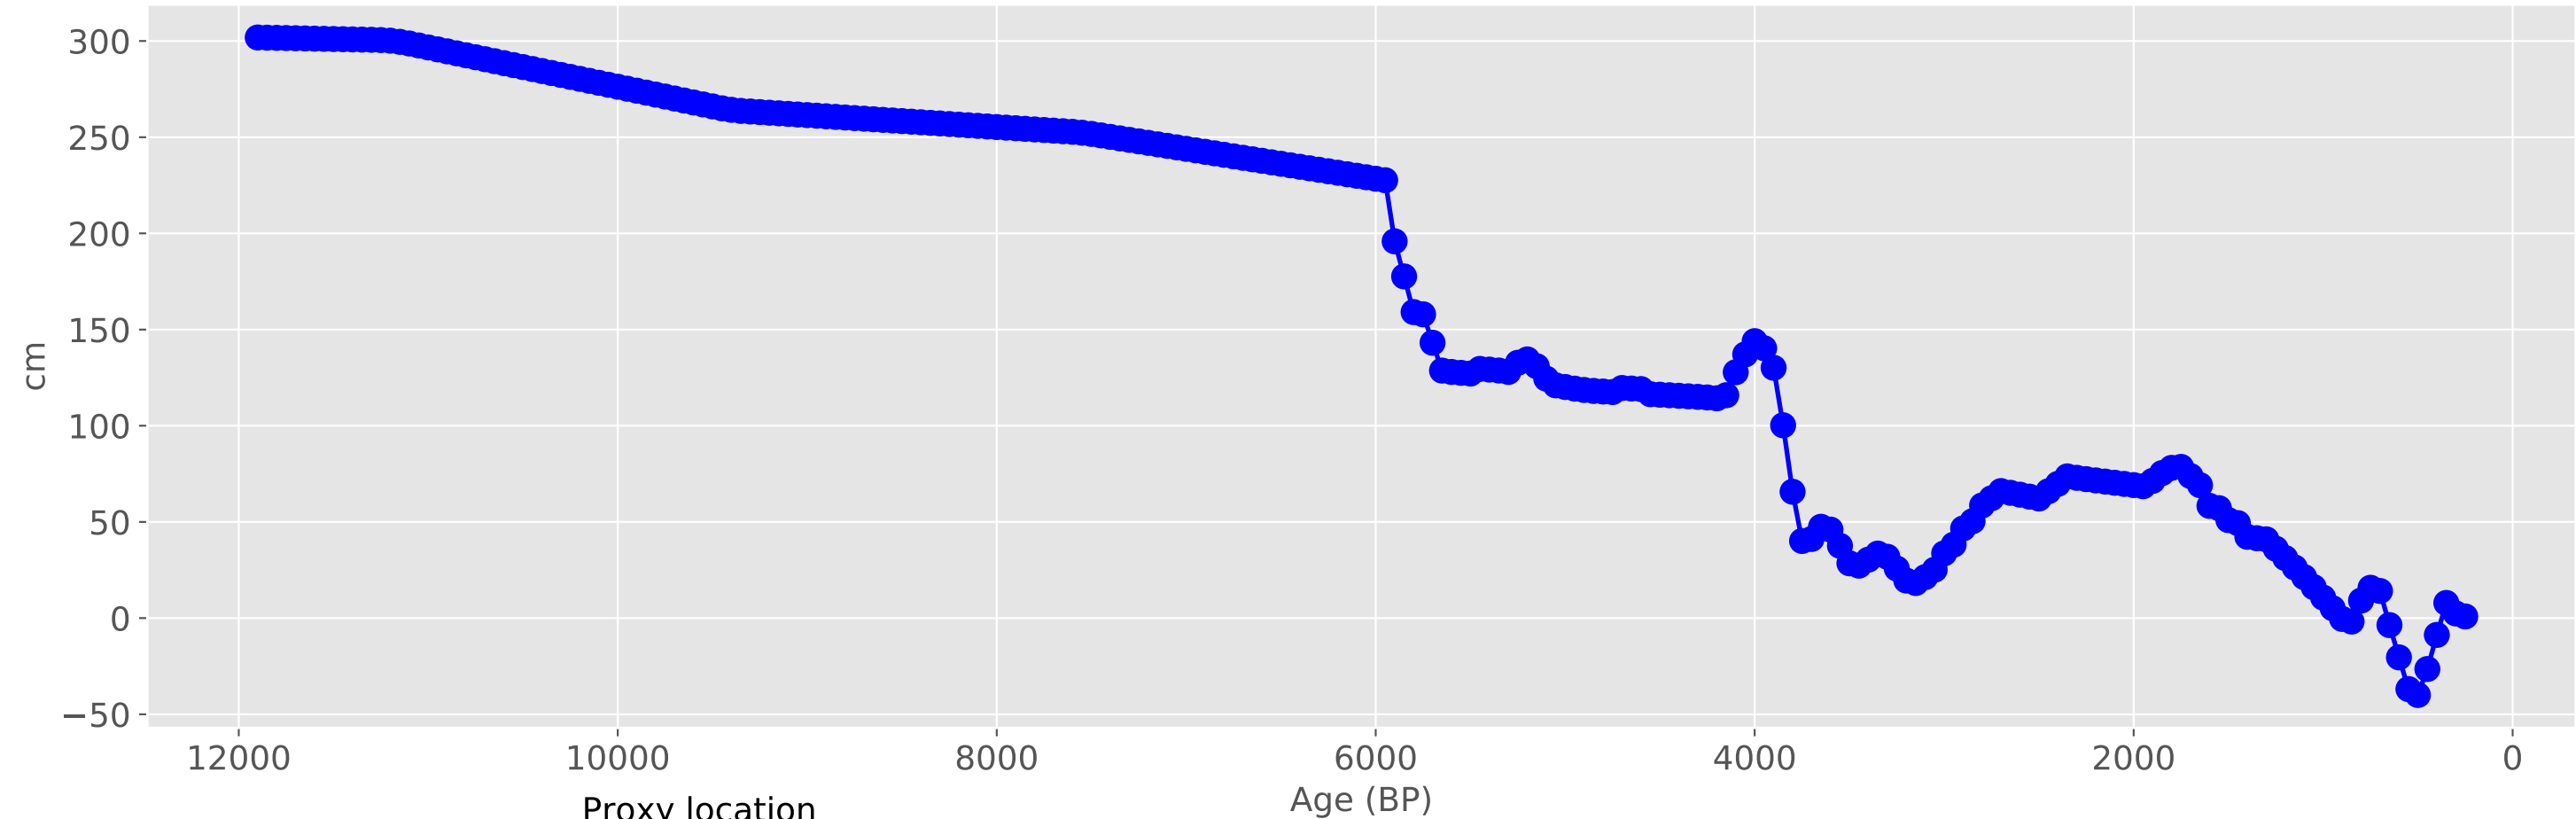

Proxy location  
(39.15 ° N, 106.41 ° W)

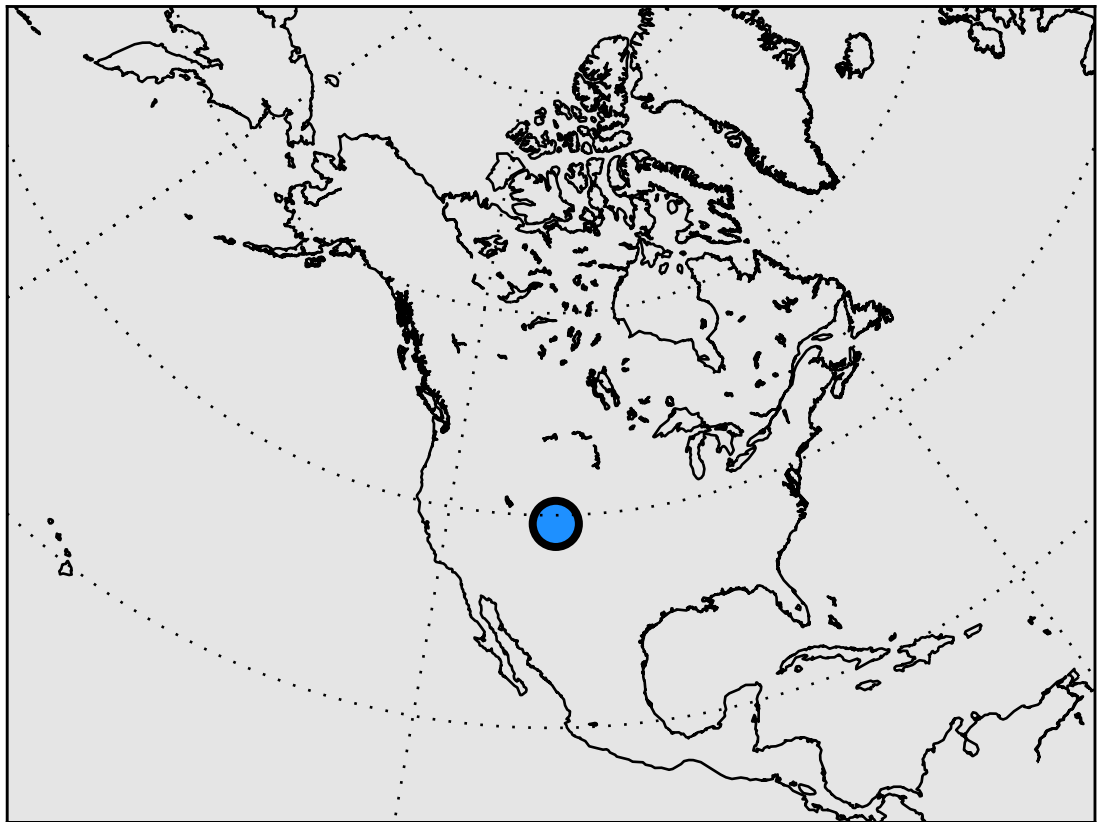

|                    |                                                       |
|--------------------|-------------------------------------------------------|
| Dataset name:      | Emerald.Shuman.2014                                   |
| Archive type:      | LakeSediment                                          |
| Proxy type:        | stratigraphy                                          |
| Variable name:     | lakeLevel                                             |
| Latitude ( ° N):   | 39.152                                                |
| Longitude ( ° E):  | -106.406                                              |
| Elevation (m):     | 3053.0                                                |
| Interp. variable:  | P-E                                                   |
| Interp. detail:    | lakeLevel@surface                                     |
| Interp. season:    | annual                                                |
| Interp. direction: | negative                                              |
| Pub. 1 title:      | A north-south moisture dipole at multi-century sca... |
| Pub. 1 authors:    | Shuman, B. N.;Carter, G. E.;Hougardy, D. D.;Powers... |
| Pub. 1 year:       | 2014                                                  |
| Pub. 1 DOI:        | 10.2113/gsrocky.49.1.33                               |
| Original data URL: | www.ncdc.noaa.gov/paleo/study/23079                   |

Proxy data and metadata  
LakeSediment | Ti | LagunaDeJuanacatlan.Jones.2015 | LPD91196716

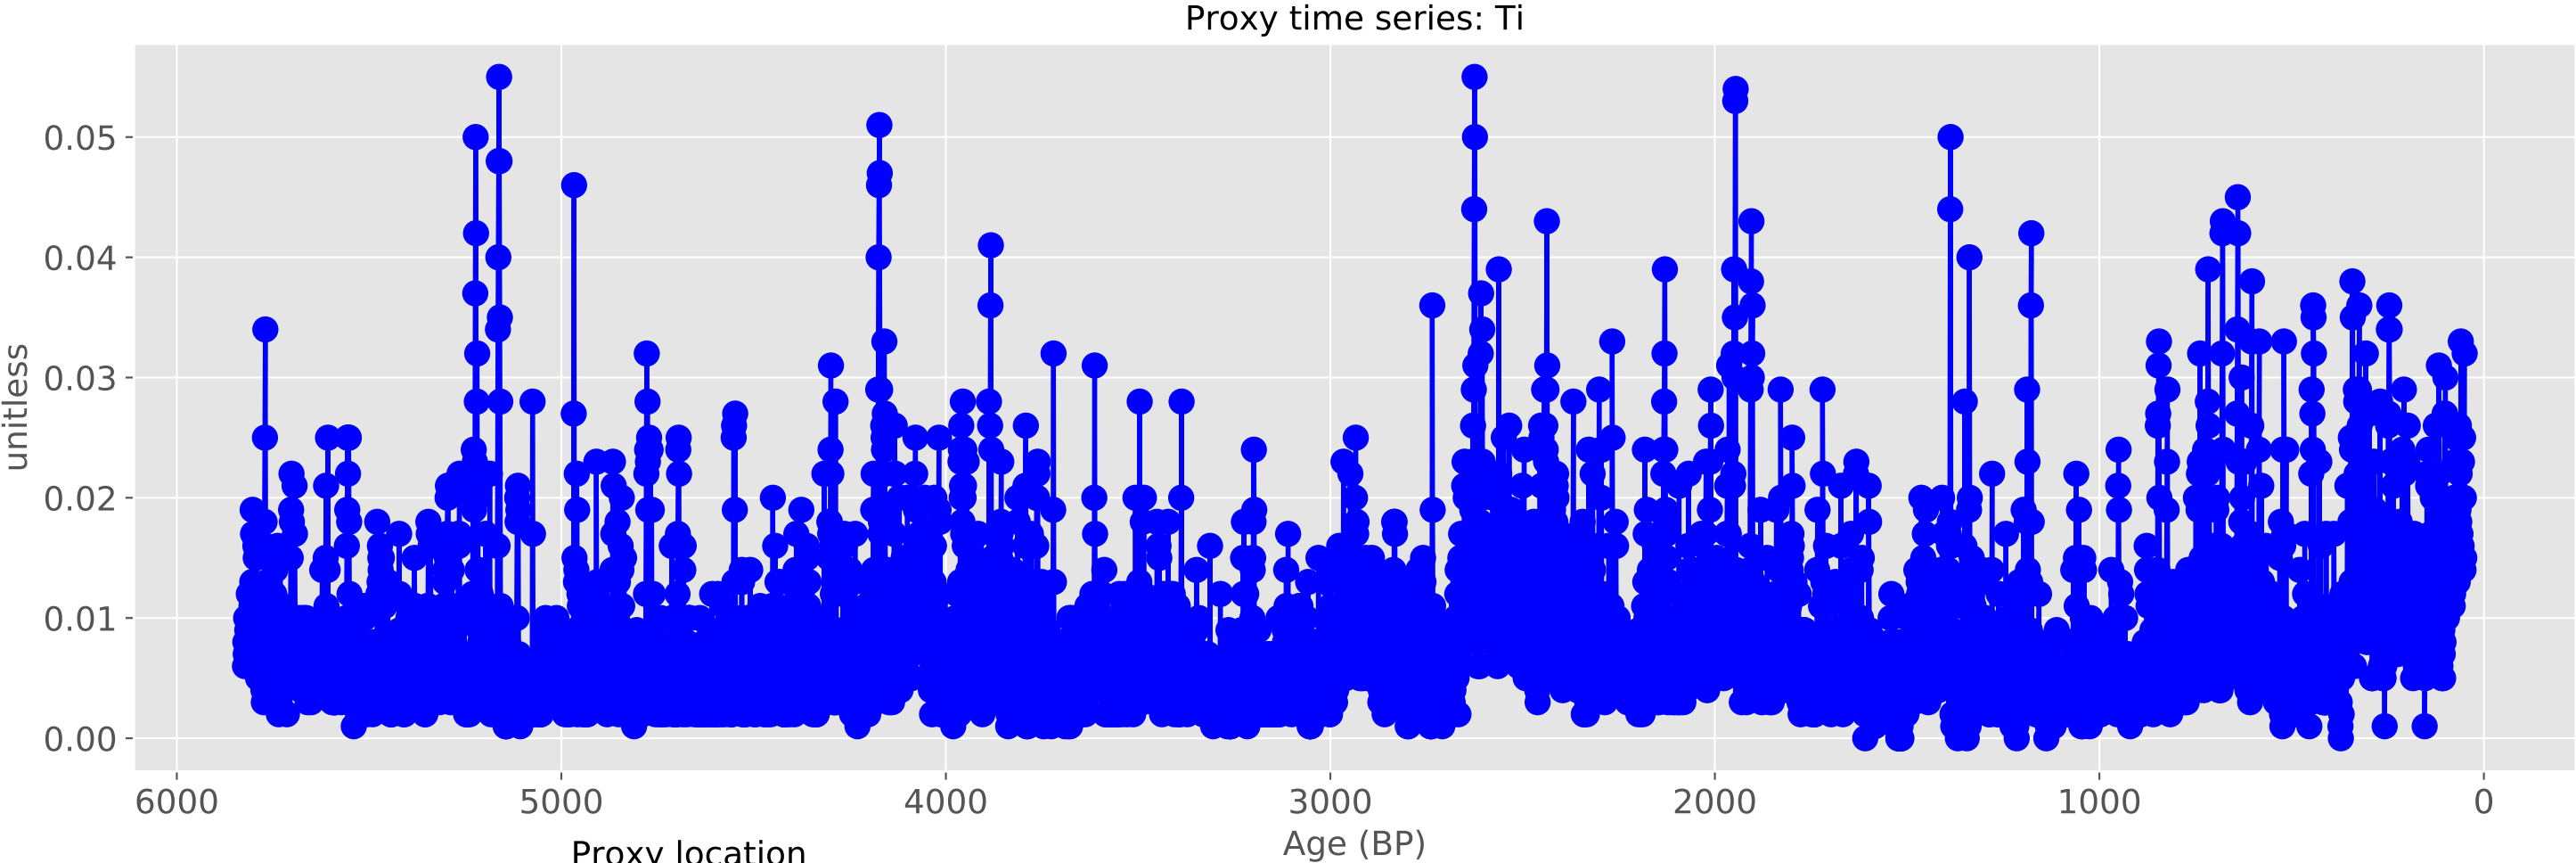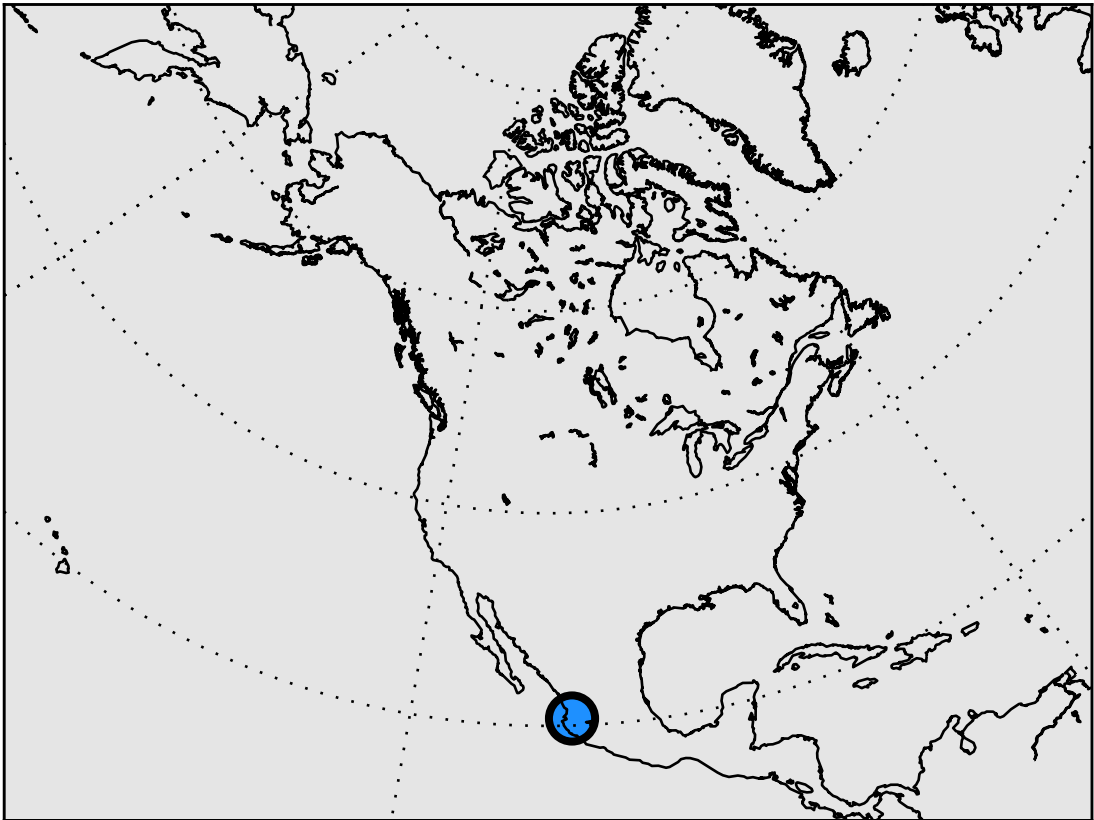

|                    |                                                       |
|--------------------|-------------------------------------------------------|
| Dataset name:      | LagunaDeJuanacatlan.Jones.2015                        |
| Archive type:      | LakeSediment                                          |
| Proxy type:        | Ti                                                    |
| Variable name:     | Ti                                                    |
| Latitude ( ° N):   | 20.6293                                               |
| Longitude ( ° E):  | -104.7364                                             |
| Elevation (m):     | 2000.0                                                |
| Interp. variable:  | P                                                     |
| Interp. detail:    | runoff@surface                                        |
| Interp. season:    | annual                                                |
| Interp. direction: | positive                                              |
| Pub. 1 title:      | Late Holocene climate reorganisation and the North... |
| Pub. 1 authors:    | Jones, Matthew D.                                     |
| Pub. 1 year:       | 2015                                                  |
| Pub. 1 DOI:        | 10.1016/j.quascirev.2015.07.004                       |
| Original data URL: | wNA                                                   |



Proxy data and metadata  
LakeSediment | TIC | Jenny.Larson.2016 | WEB9887226c

Proxy time series: clastic\_flux

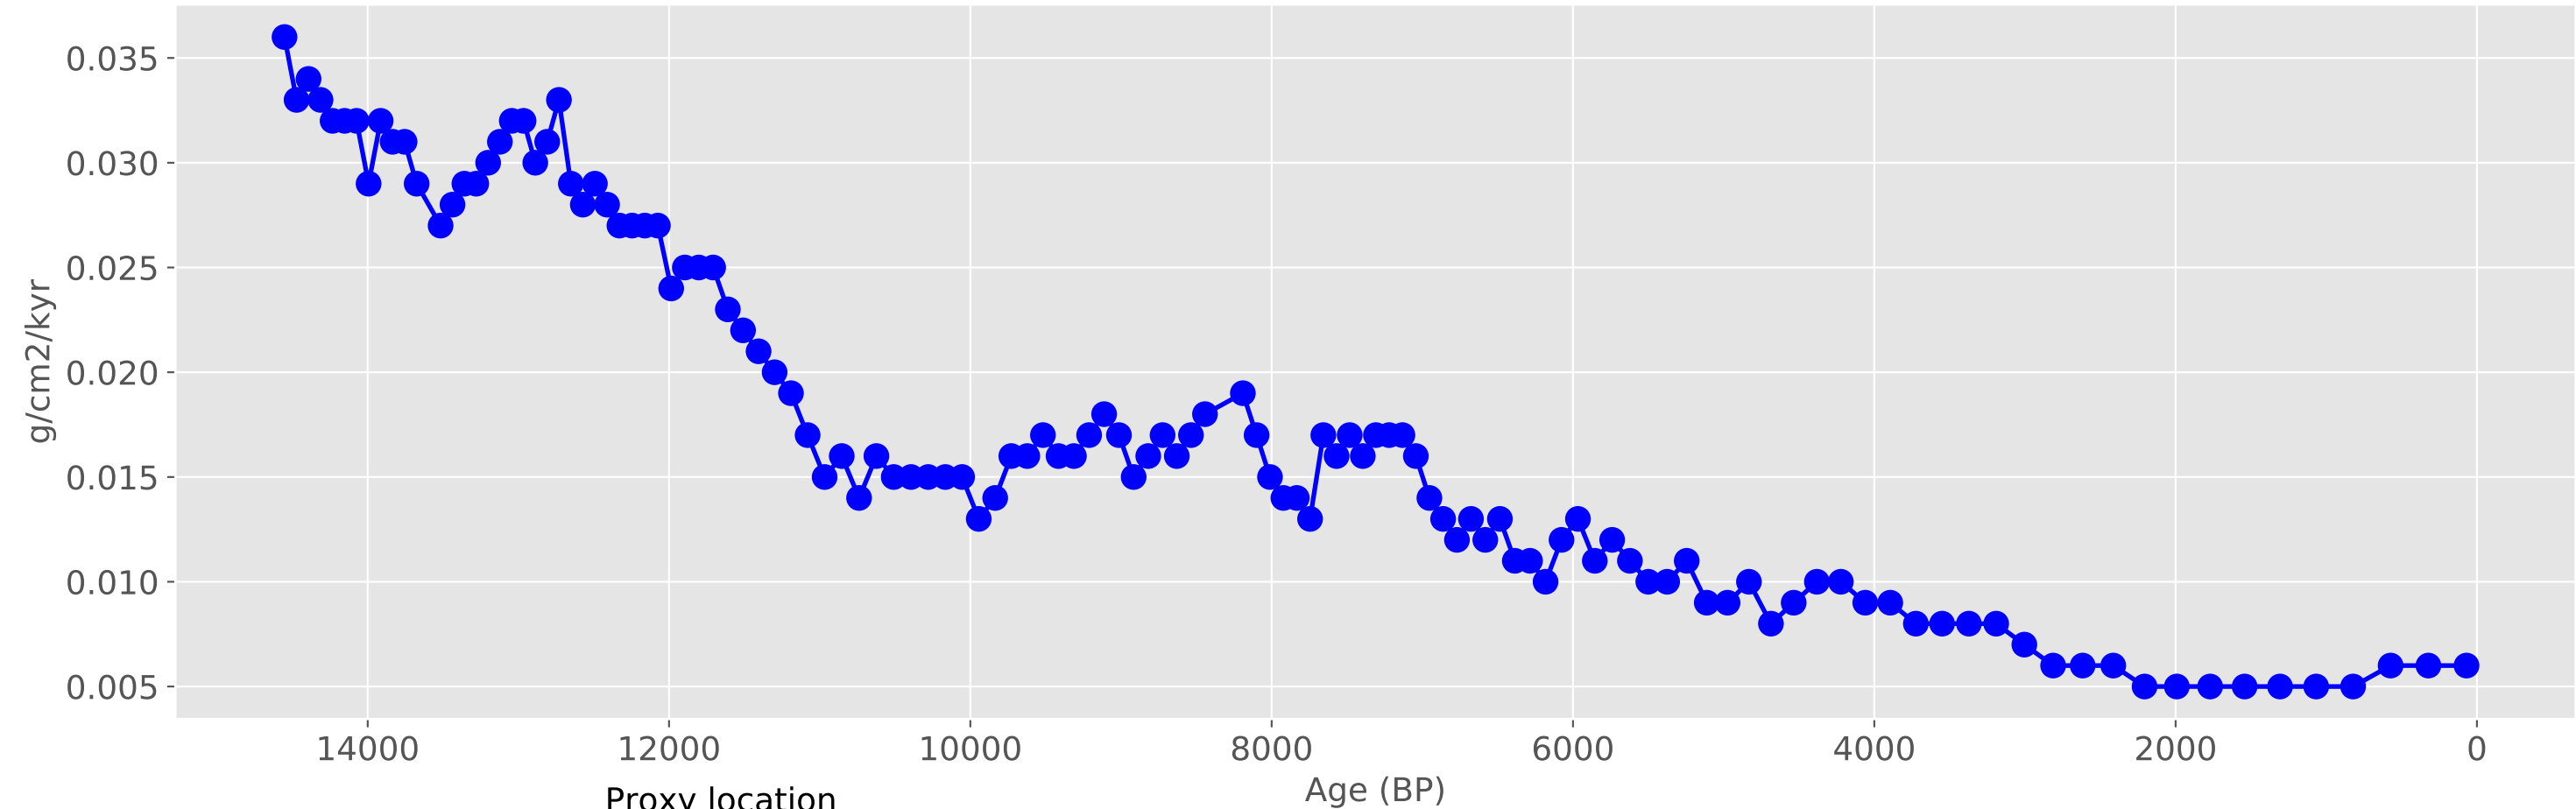

Proxy location  
(43.75 ° N, 110.73 ° W)

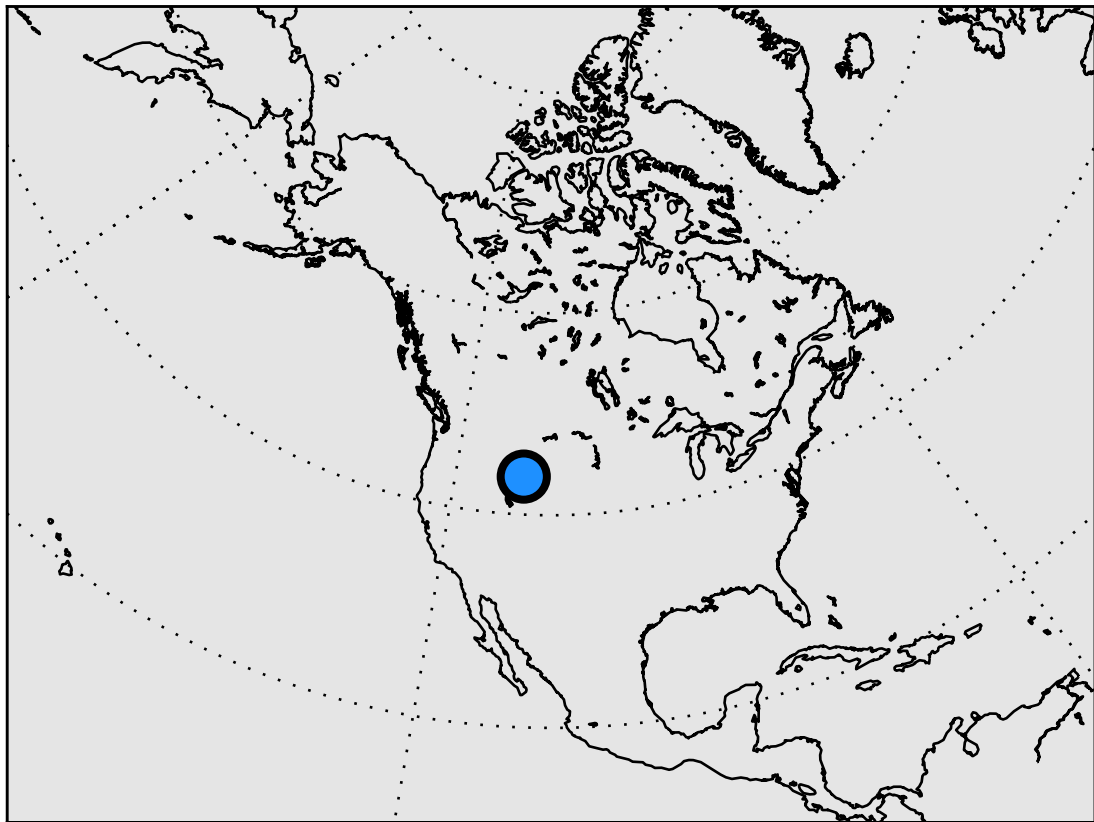

|                    |                                                       |
|--------------------|-------------------------------------------------------|
| Dataset name:      | Jenny.Larson.2016                                     |
| Archive type:      | LakeSediment                                          |
| Proxy type:        | TIC                                                   |
| Variable name:     | clastic_flux                                          |
| Latitude ( ° N):   | 43.7505                                               |
| Longitude ( ° E):  | -110.7343                                             |
| Elevation (m):     | 2070.0                                                |
| Interp. variable:  | ELA                                                   |
| Interp. detail:    | glacierExtent                                         |
| Interp. season:    | annual                                                |
| Interp. direction: | positive                                              |
| Pub. 1 title:      | Deglaciation and postglacial environmental changes... |
| Pub. 1 authors:    | Larsen, Darren J.;Finkenbinder, Matthew S.;Abbott,... |
| Pub. 1 year:       | 2016                                                  |
| Pub. 1 DOI:        | 10.1016/j.quascirev.2016.02.024                       |
| Original data URL: | www.ncdc.noaa.gov/paleo/study/20128                   |

Proxy data and metadata  
**LakeSediment | Ti,Ca,K | BlueLake.Routson.2019 | LPDabb1f771**

Proxy time series: dustFlux

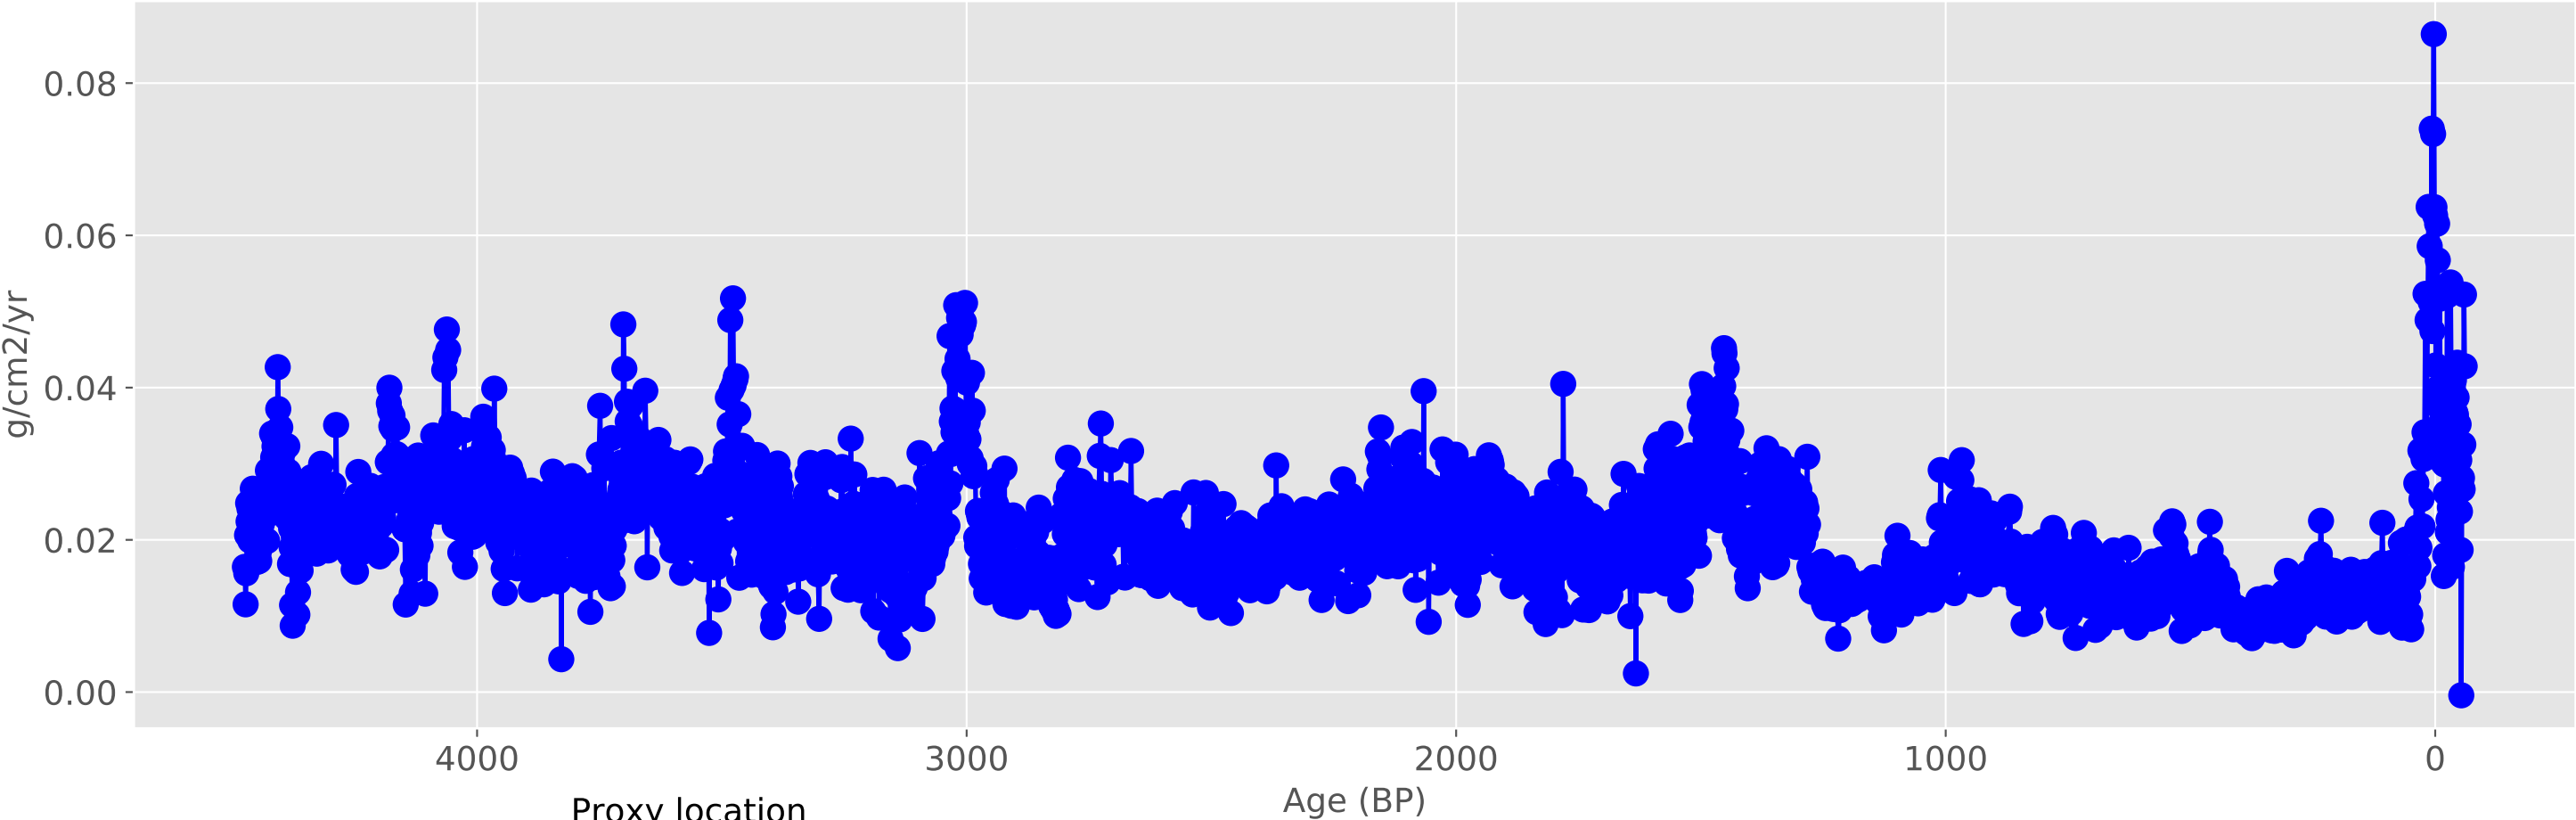

Proxy location  
(37.24 ° N, 106.63 ° W)

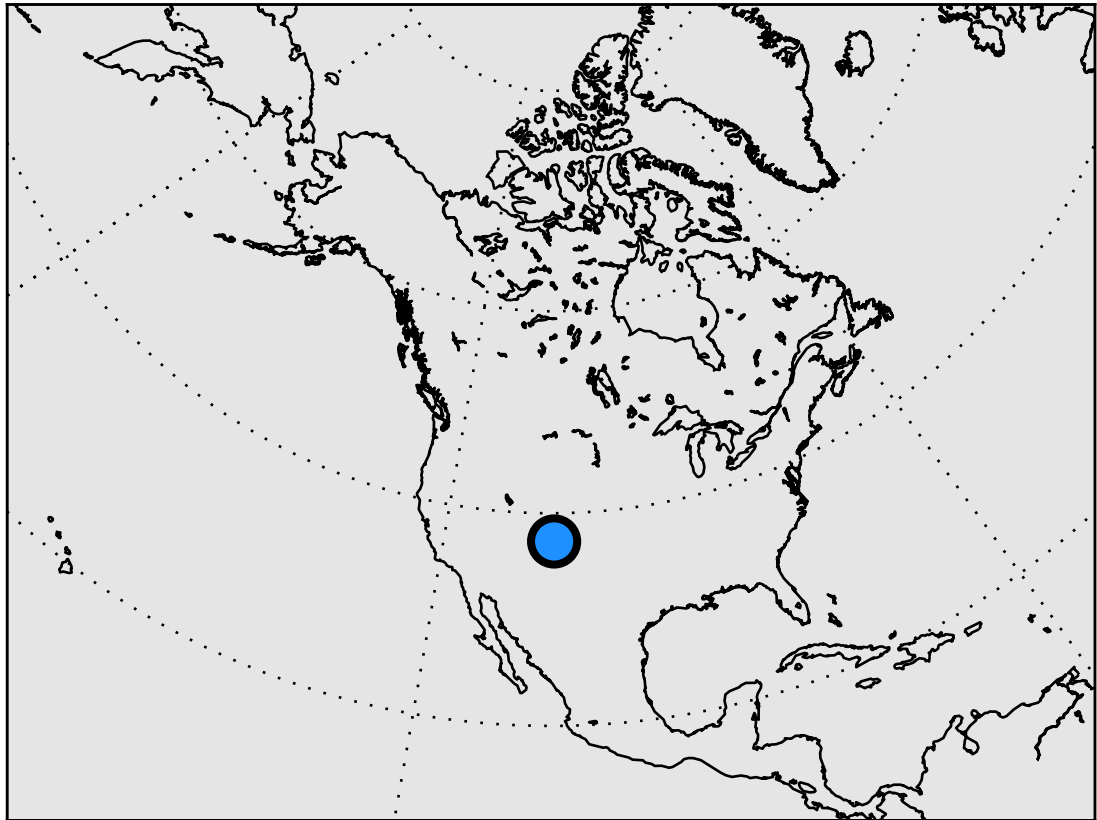

|                    |                                                                                              |
|--------------------|----------------------------------------------------------------------------------------------|
| Dataset name:      | BlueLake.Routson.2019                                                                        |
| Archive type:      | LakeSediment                                                                                 |
| Proxy type:        | Ti,Ca,K                                                                                      |
| Variable name:     | dustFlux                                                                                     |
| Latitude ( ° N):   | 37.24                                                                                        |
| Longitude ( ° E):  | -106.63                                                                                      |
| Elevation (m):     | 3500.0                                                                                       |
| Interp. variable:  | DUST                                                                                         |
| Interp. detail:    | @surface                                                                                     |
| Interp. season:    | annual                                                                                       |
| Interp. direction: | positive                                                                                     |
| Pub. 1 title:      | A 4,500-Year-Long Record of Southern Rocky Mountai...                                        |
| Pub. 1 authors:    | Routson, Cody C.;Arcusa, Stéphanie H.;McKay, Nicho...                                        |
| Pub. 1 year:       | 2019                                                                                         |
| Pub. 1 DOI:        | 10.1029/2019GL083255                                                                         |
| Original data URL: | <a href="http://www.ncdc.noaa.gov/paleo/study/27078">www.ncdc.noaa.gov/paleo/study/27078</a> |

Proxy data and metadata

LakeSediment | TOC | Harding.Finkenbinder.2014 | WEB6b4c459e

Proxy time series: TOC

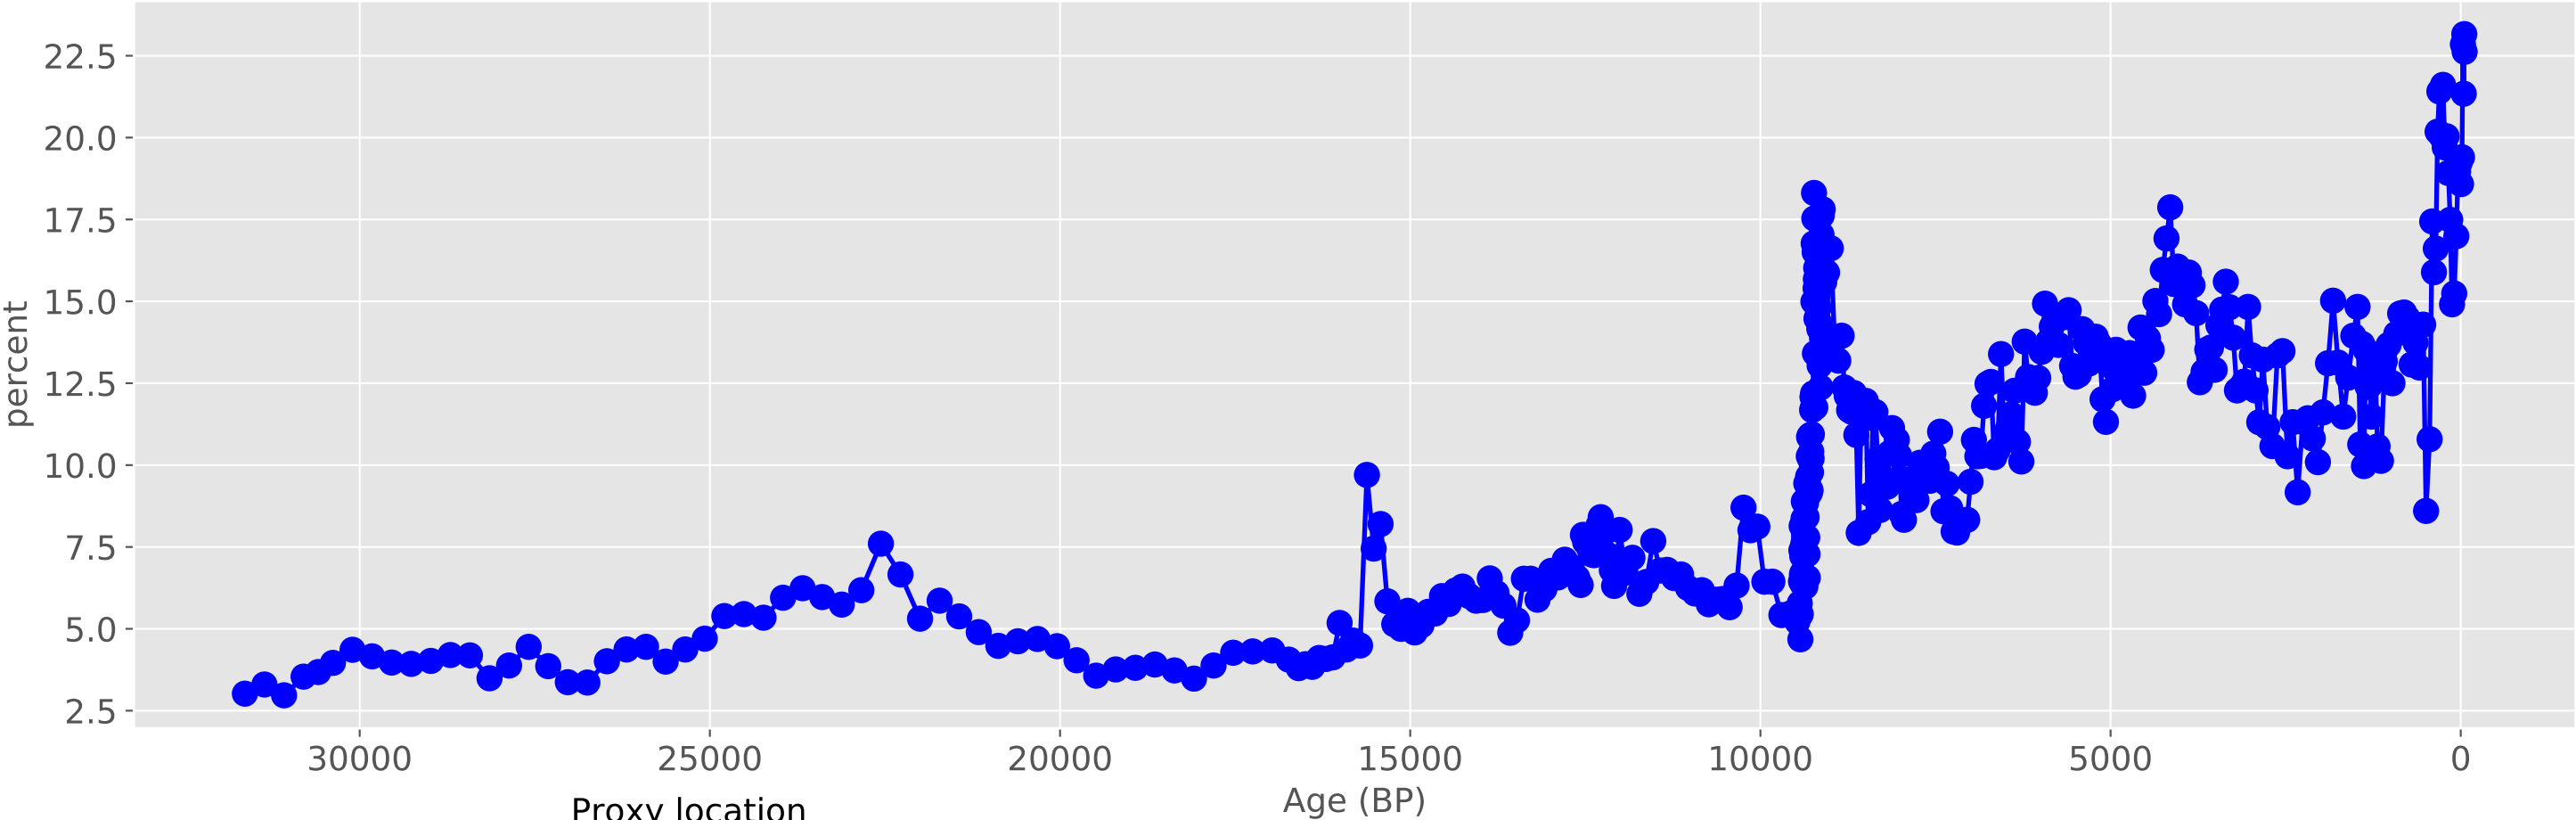

Proxy location  
(64.42 ° N, 146.85 ° W)

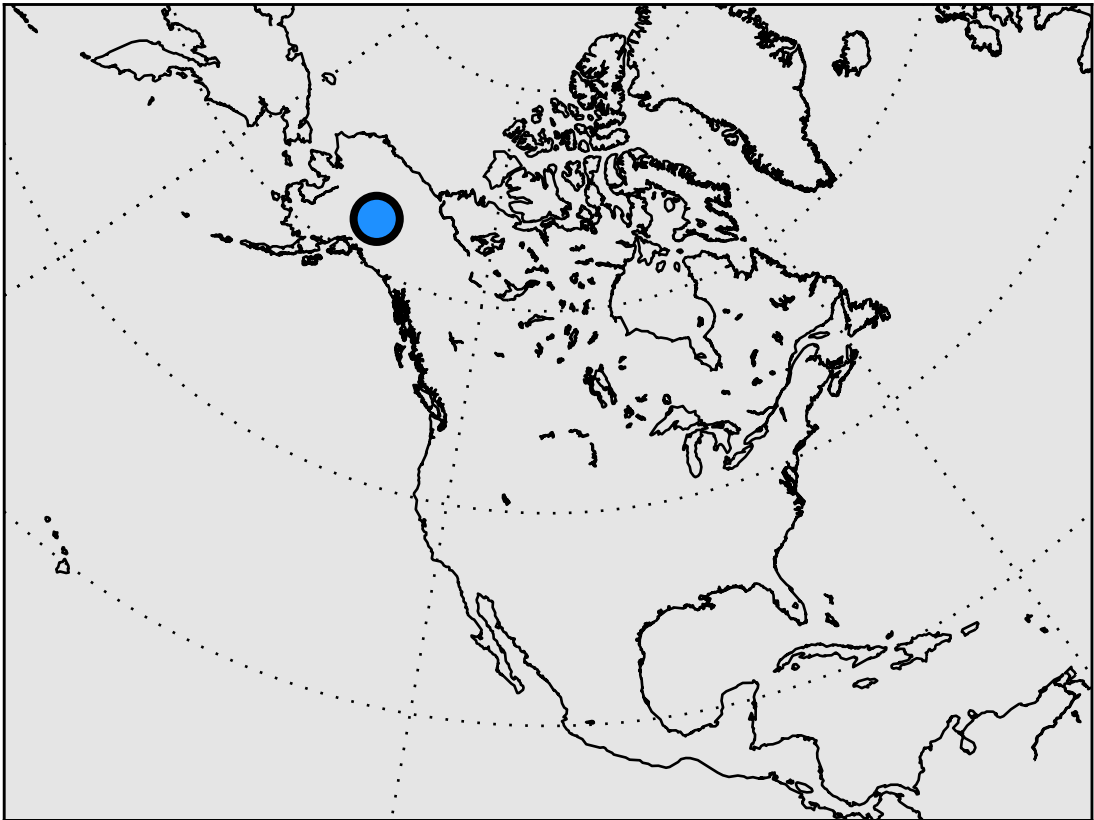

|                    |                                                                                              |
|--------------------|----------------------------------------------------------------------------------------------|
| Dataset name:      | Harding.Finkenbinder.2014                                                                    |
| Archive type:      | LakeSediment                                                                                 |
| Proxy type:        | TOC                                                                                          |
| Variable name:     | TOC                                                                                          |
| Latitude ( ° N):   | 64.42                                                                                        |
| Longitude ( ° E):  | -146.85                                                                                      |
| Elevation (m):     | 217.0                                                                                        |
| Interp. variable:  | P-E                                                                                          |
| Interp. detail:    | lakeLevel@surface                                                                            |
| Interp. season:    | annual                                                                                       |
| Interp. direction: | positive                                                                                     |
| Pub. 1 title:      | A 31,000 year record of paleoenvironmental and lak...                                        |
| Pub. 1 authors:    | Finkenbinder, Matthew S.                                                                     |
| Pub. 1 year:       | 2014                                                                                         |
| Pub. 1 DOI:        | 10.1016/j.quascirev.2014.01.005                                                              |
| Original data URL: | <a href="http://www.ncdc.noaa.gov/paleo/study/15655">www.ncdc.noaa.gov/paleo/study/15655</a> |

Proxy data and metadata  
LakeSediment | TOC | Hallet.McKay.2009 | PYT2041G134

Proxy time series: organic

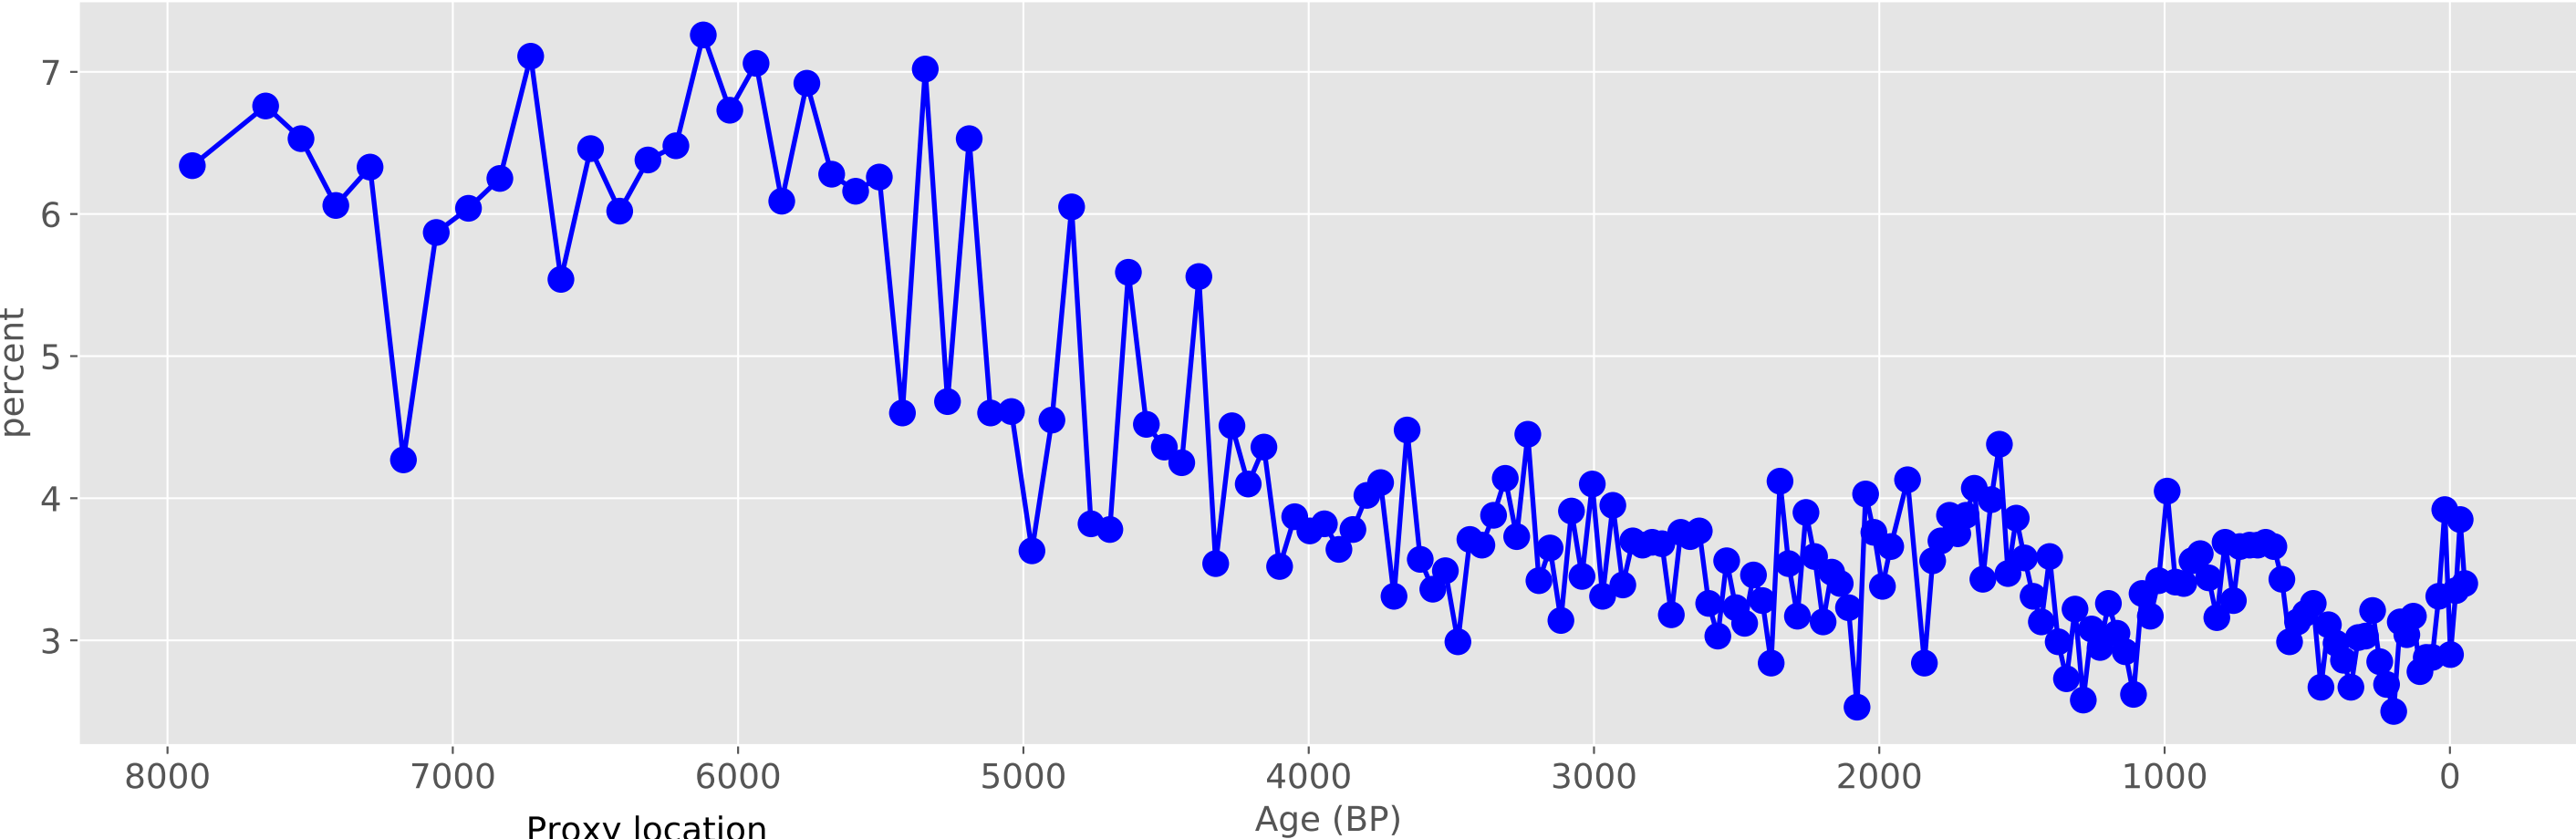

Proxy location  
(61.49 ° N, 146.24 ° W)

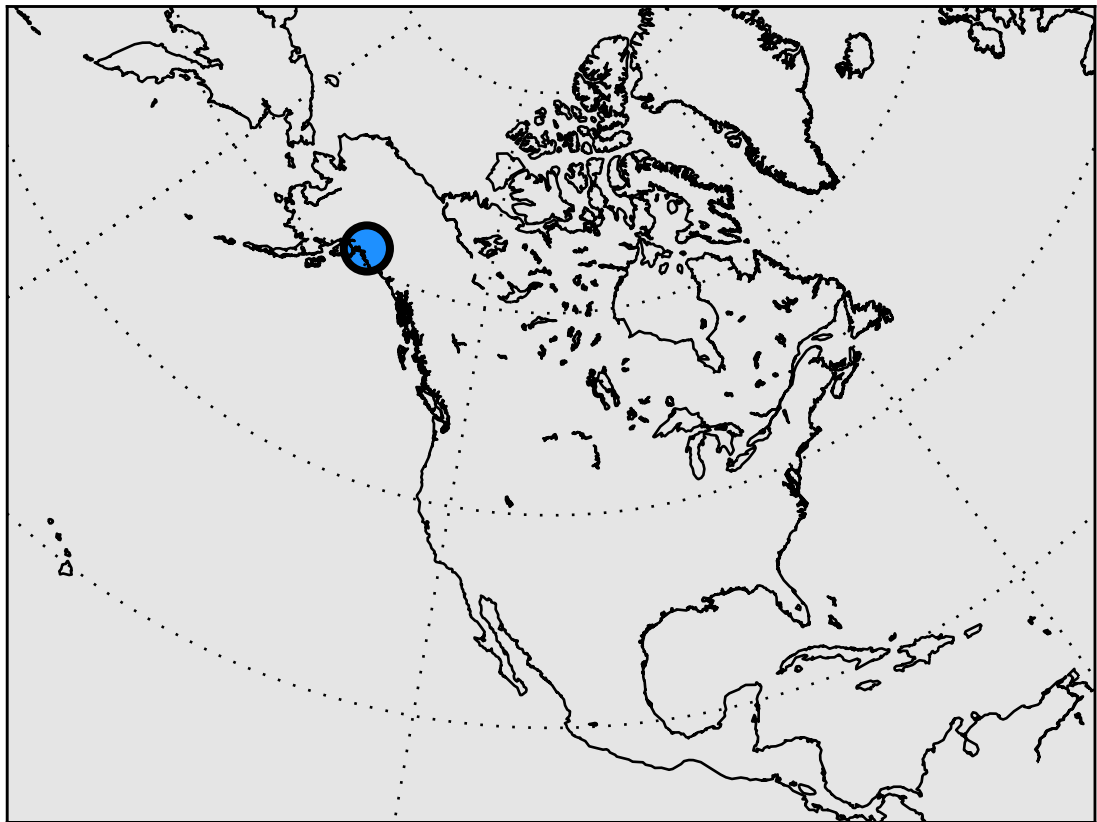

|                    |                                                                                              |
|--------------------|----------------------------------------------------------------------------------------------|
| Dataset name:      | Hallet.McKay.2009                                                                            |
| Archive type:      | LakeSediment                                                                                 |
| Proxy type:        | TOC                                                                                          |
| Variable name:     | organic                                                                                      |
| Latitude ( ° N):   | 61.4919                                                                                      |
| Longitude ( ° E):  | -146.2389                                                                                    |
| Elevation (m):     | 1128.0                                                                                       |
| Interp. variable:  | ELA                                                                                          |
| Interp. detail:    | glacierExtent                                                                                |
| Interp. season:    | annual                                                                                       |
| Interp. direction: | negative                                                                                     |
| Pub. 1 title:      | Holocene climate and glacier variability at Hallet...                                        |
| Pub. 1 authors:    | McKay, Nicholas P.; Kaufman, Darrell S.                                                      |
| Pub. 1 year:       | 2009                                                                                         |
| Pub. 1 DOI:        | 10.1007/s10933-008-9260-0                                                                    |
| Original data URL: | <a href="http://www.ncdc.noaa.gov/paleo/study/15444">www.ncdc.noaa.gov/paleo/study/15444</a> |

Proxy data and metadata  
LakeSediment | TOC | greyling.Mckay.2009 | PYTJ5STI3CN

Proxy time series: organic

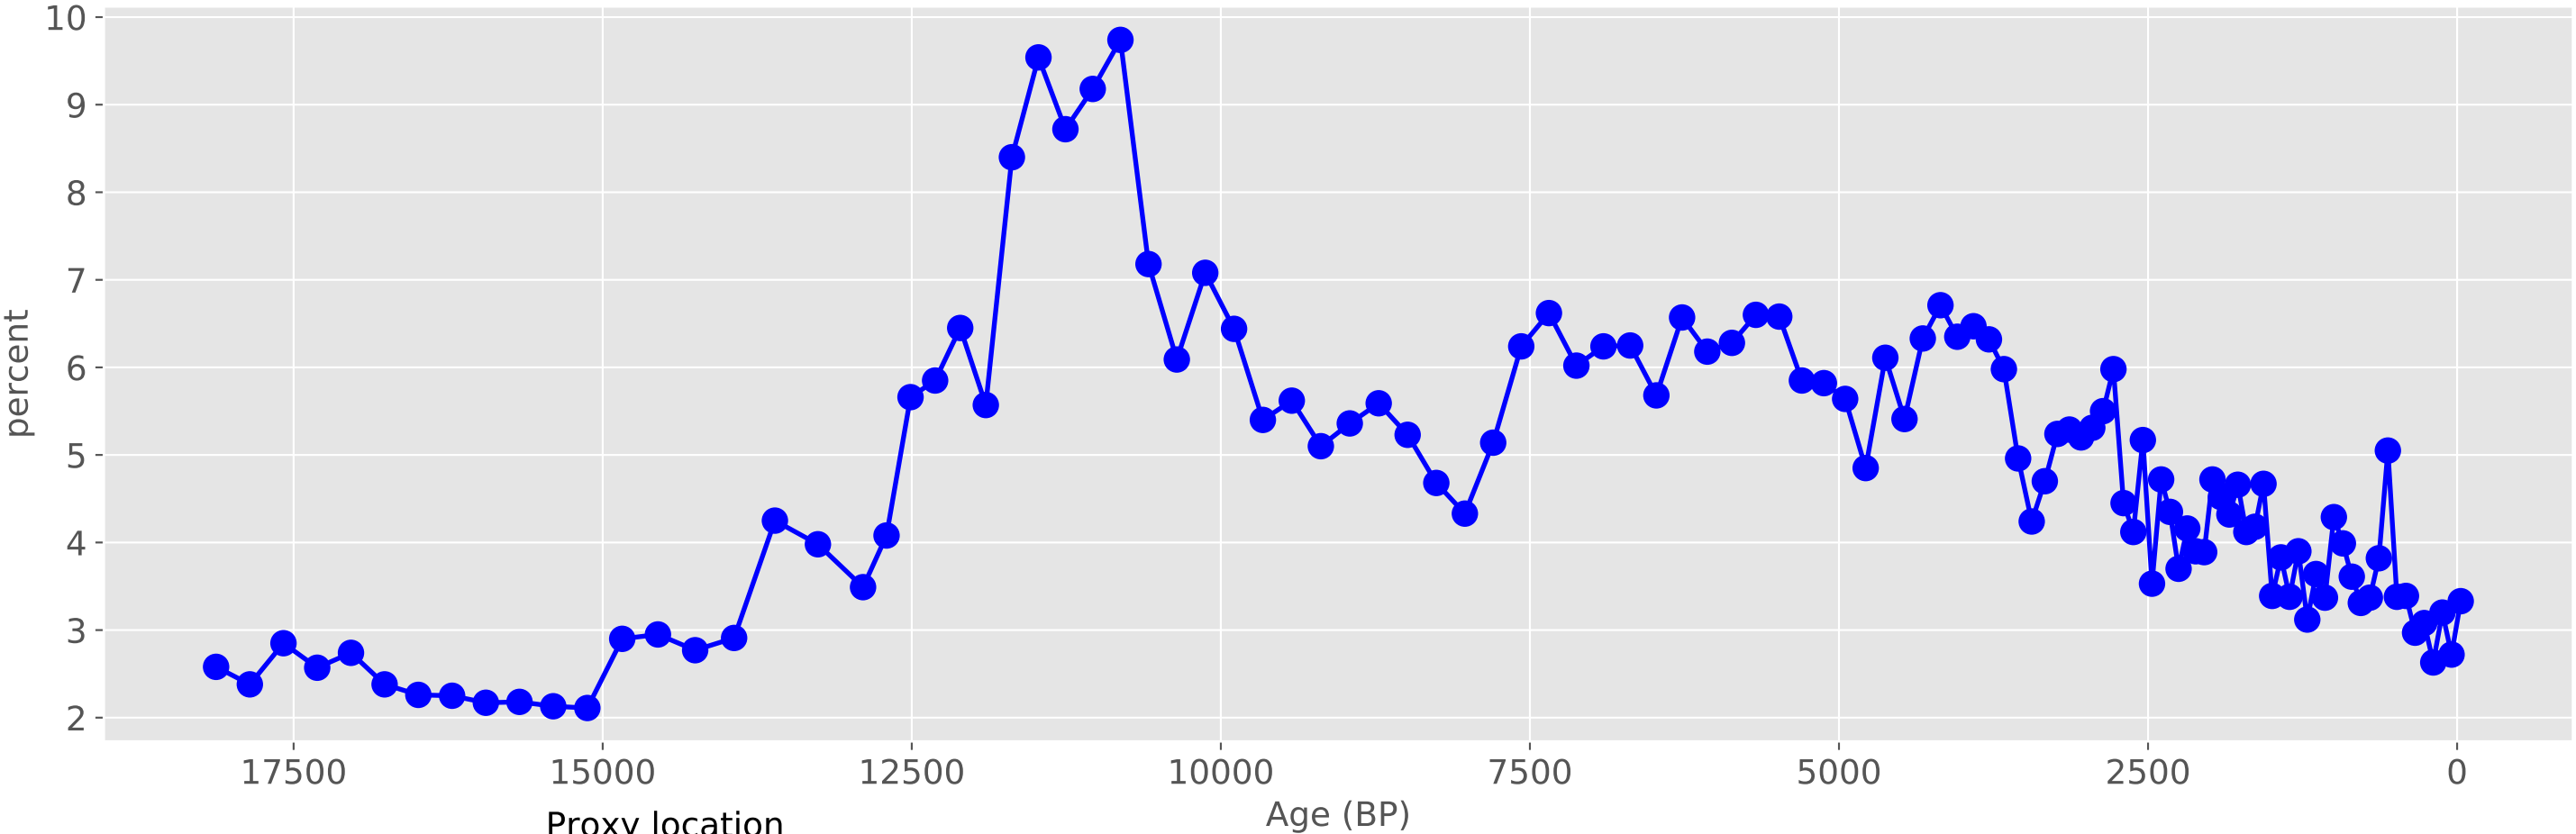

Proxy location  
(61.38 ° N, 145.74 ° W)

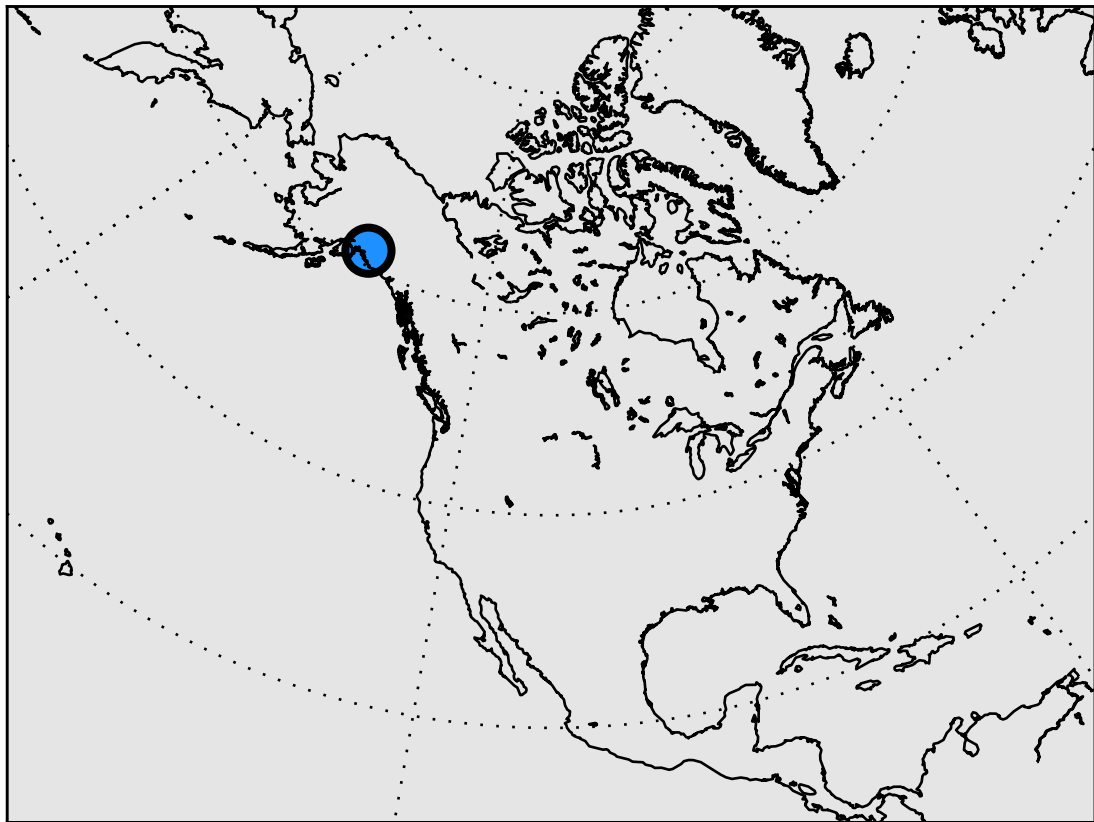

|                    |                                                       |
|--------------------|-------------------------------------------------------|
| Dataset name:      | greyling.Mckay.2009                                   |
| Archive type:      | LakeSediment                                          |
| Proxy type:        | TOC                                                   |
| Variable name:     | organic                                               |
| Latitude ( ° N):   | 61.3813                                               |
| Longitude ( ° E):  | -145.737                                              |
| Elevation (m):     | 1015.0                                                |
| Interp. variable:  | ELA                                                   |
| Interp. detail:    | glacierExtent                                         |
| Interp. season:    | annual                                                |
| Interp. direction: | negative                                              |
| Pub. 1 title:      | Holocene climate and glacier variability at Hallet... |
| Pub. 1 authors:    | McKay, Nicholas P.; Kaufman, Darrell S.               |
| Pub. 1 year:       | 2009                                                  |
| Pub. 1 DOI:        | 10.1007/s10933-008-9260-0                             |
| Original data URL: | www.ncdc.noaa.gov/paleo/study/15444                   |

Proxy data and metadata  
LakeSediment | TOC | WA01.Rainville.2013 | WEBc8473abd

Proxy time series: LOI

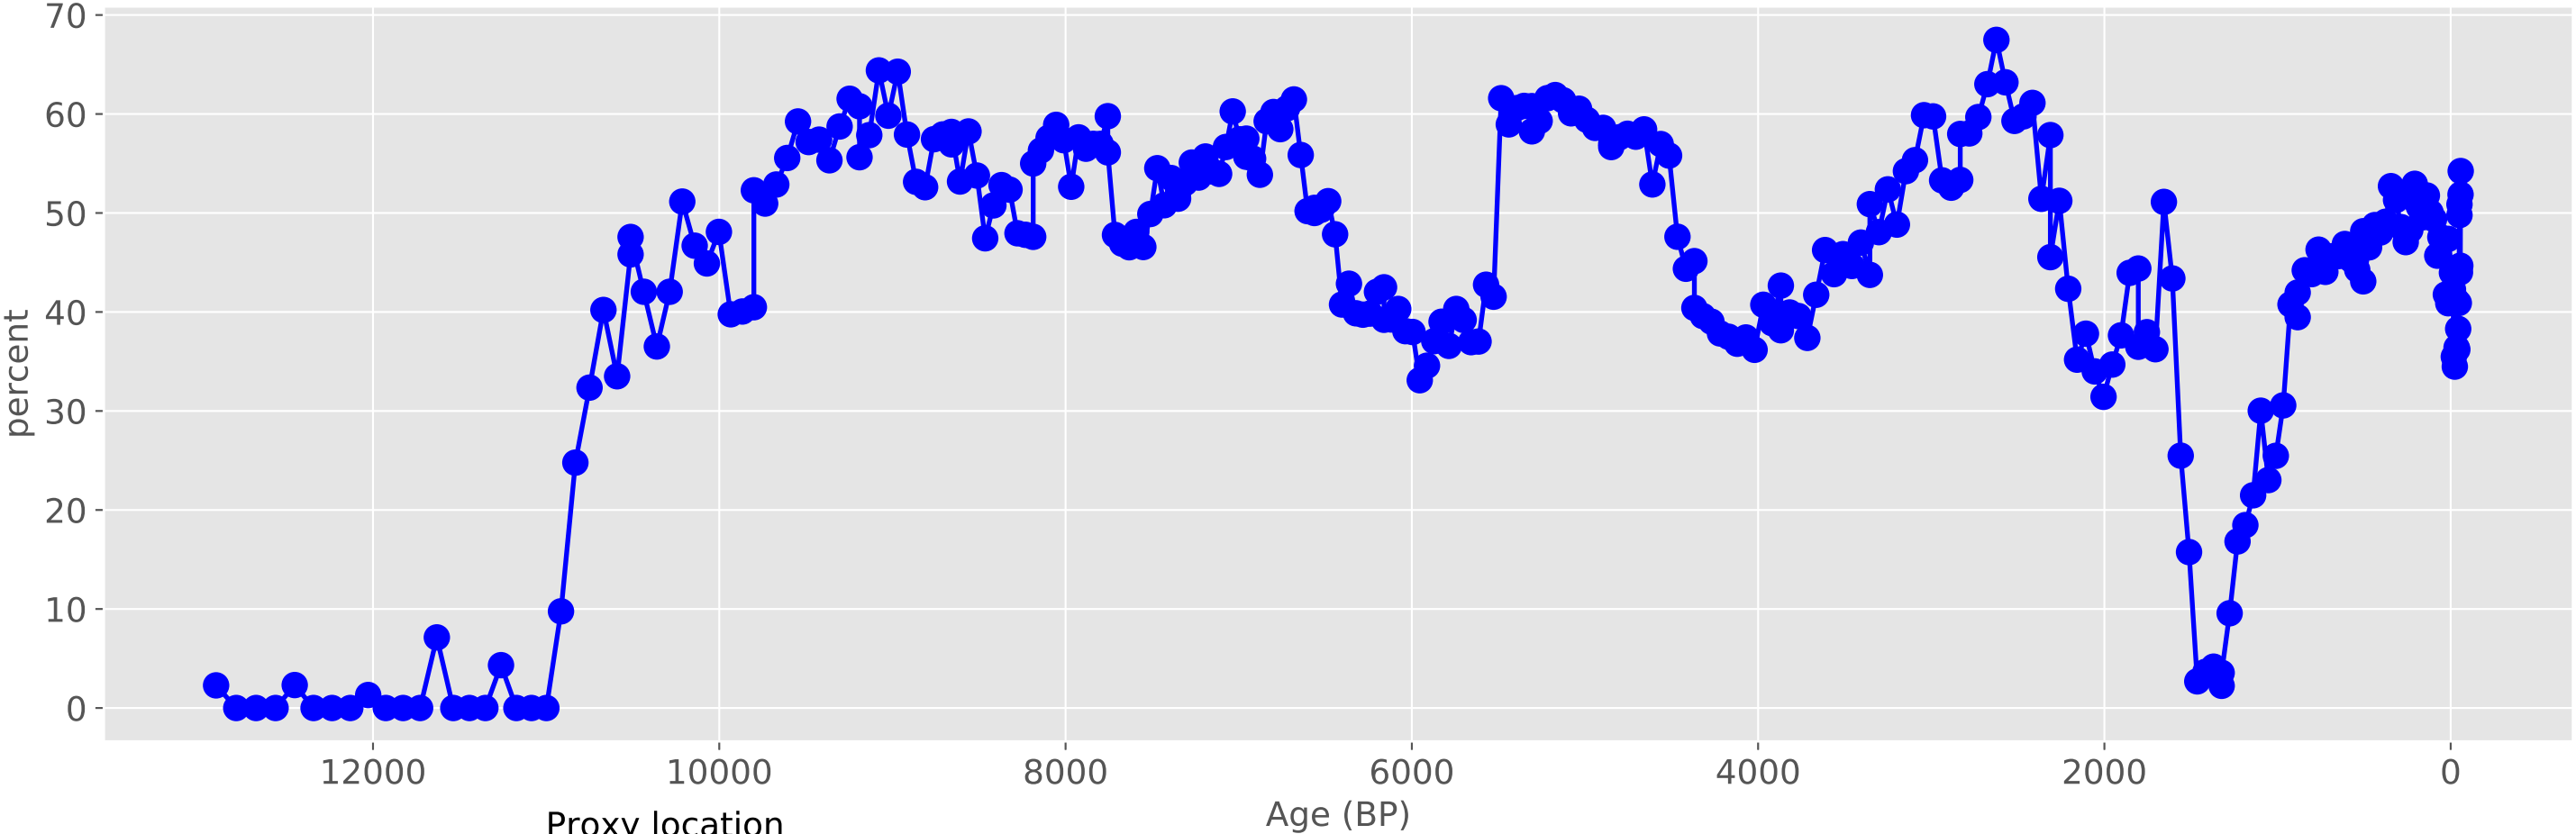

Proxy location  
(61.24 ° N, 136.93 ° W)

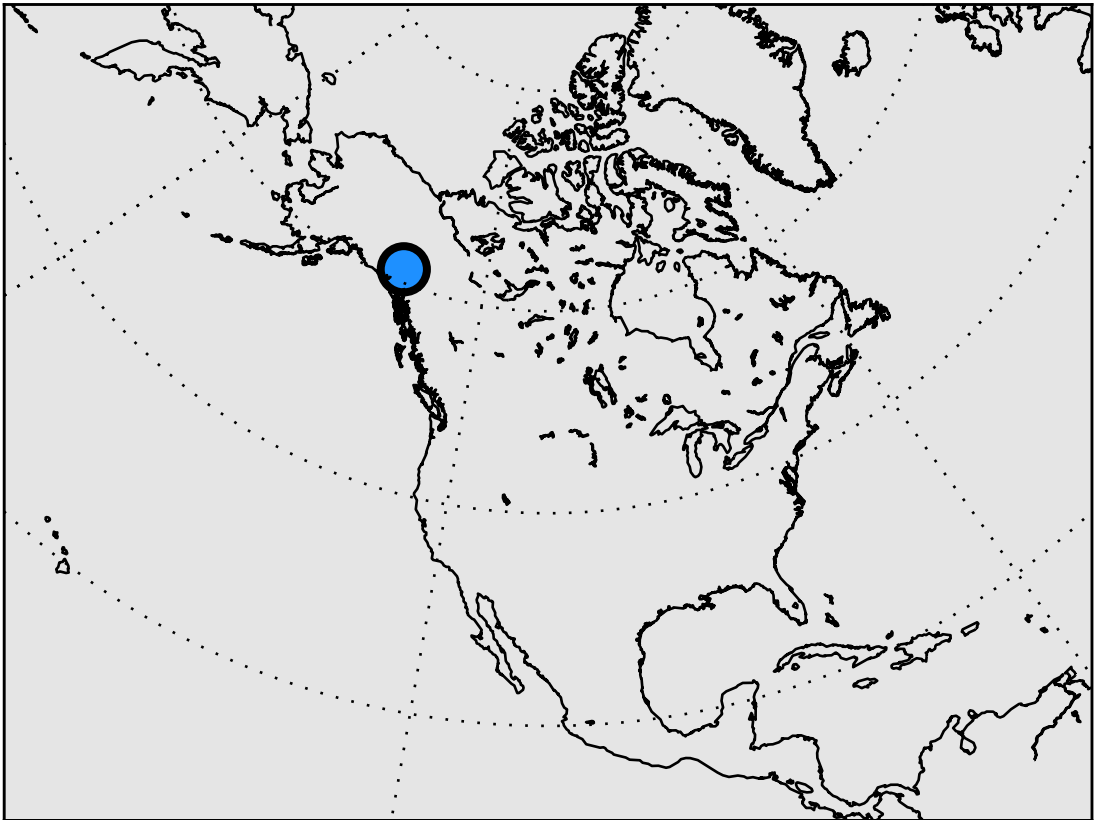

|                    |                                                                                              |
|--------------------|----------------------------------------------------------------------------------------------|
| Dataset name:      | WA01.Rainville.2013                                                                          |
| Archive type:      | LakeSediment                                                                                 |
| Proxy type:        | TOC                                                                                          |
| Variable name:     | LOI                                                                                          |
| Latitude ( ° N):   | 61.2447                                                                                      |
| Longitude ( ° E):  | -136.9264                                                                                    |
| Elevation (m):     | 1000.0                                                                                       |
| Interp. variable:  | P-E                                                                                          |
| Interp. detail:    | @surface                                                                                     |
| Interp. season:    | annual                                                                                       |
| Interp. direction: | negative                                                                                     |
| Pub. 1 title:      | Holocene environmental history of the Aishihik Reg...                                        |
| Pub. 1 authors:    | Rainville, Rebecca A.;Gajewski, Konrad                                                       |
| Pub. 1 year:       | 2013                                                                                         |
| Pub. 1 DOI:        | 10.1139/cjes-2012-0103                                                                       |
| Original data URL: | <a href="http://www.ncdc.noaa.gov/paleo/study/18435">www.ncdc.noaa.gov/paleo/study/18435</a> |



Proxy data and metadata  
LakeSediment | TOC | Waskey.Levy.2004 | PYT4TLJ4Q7Z

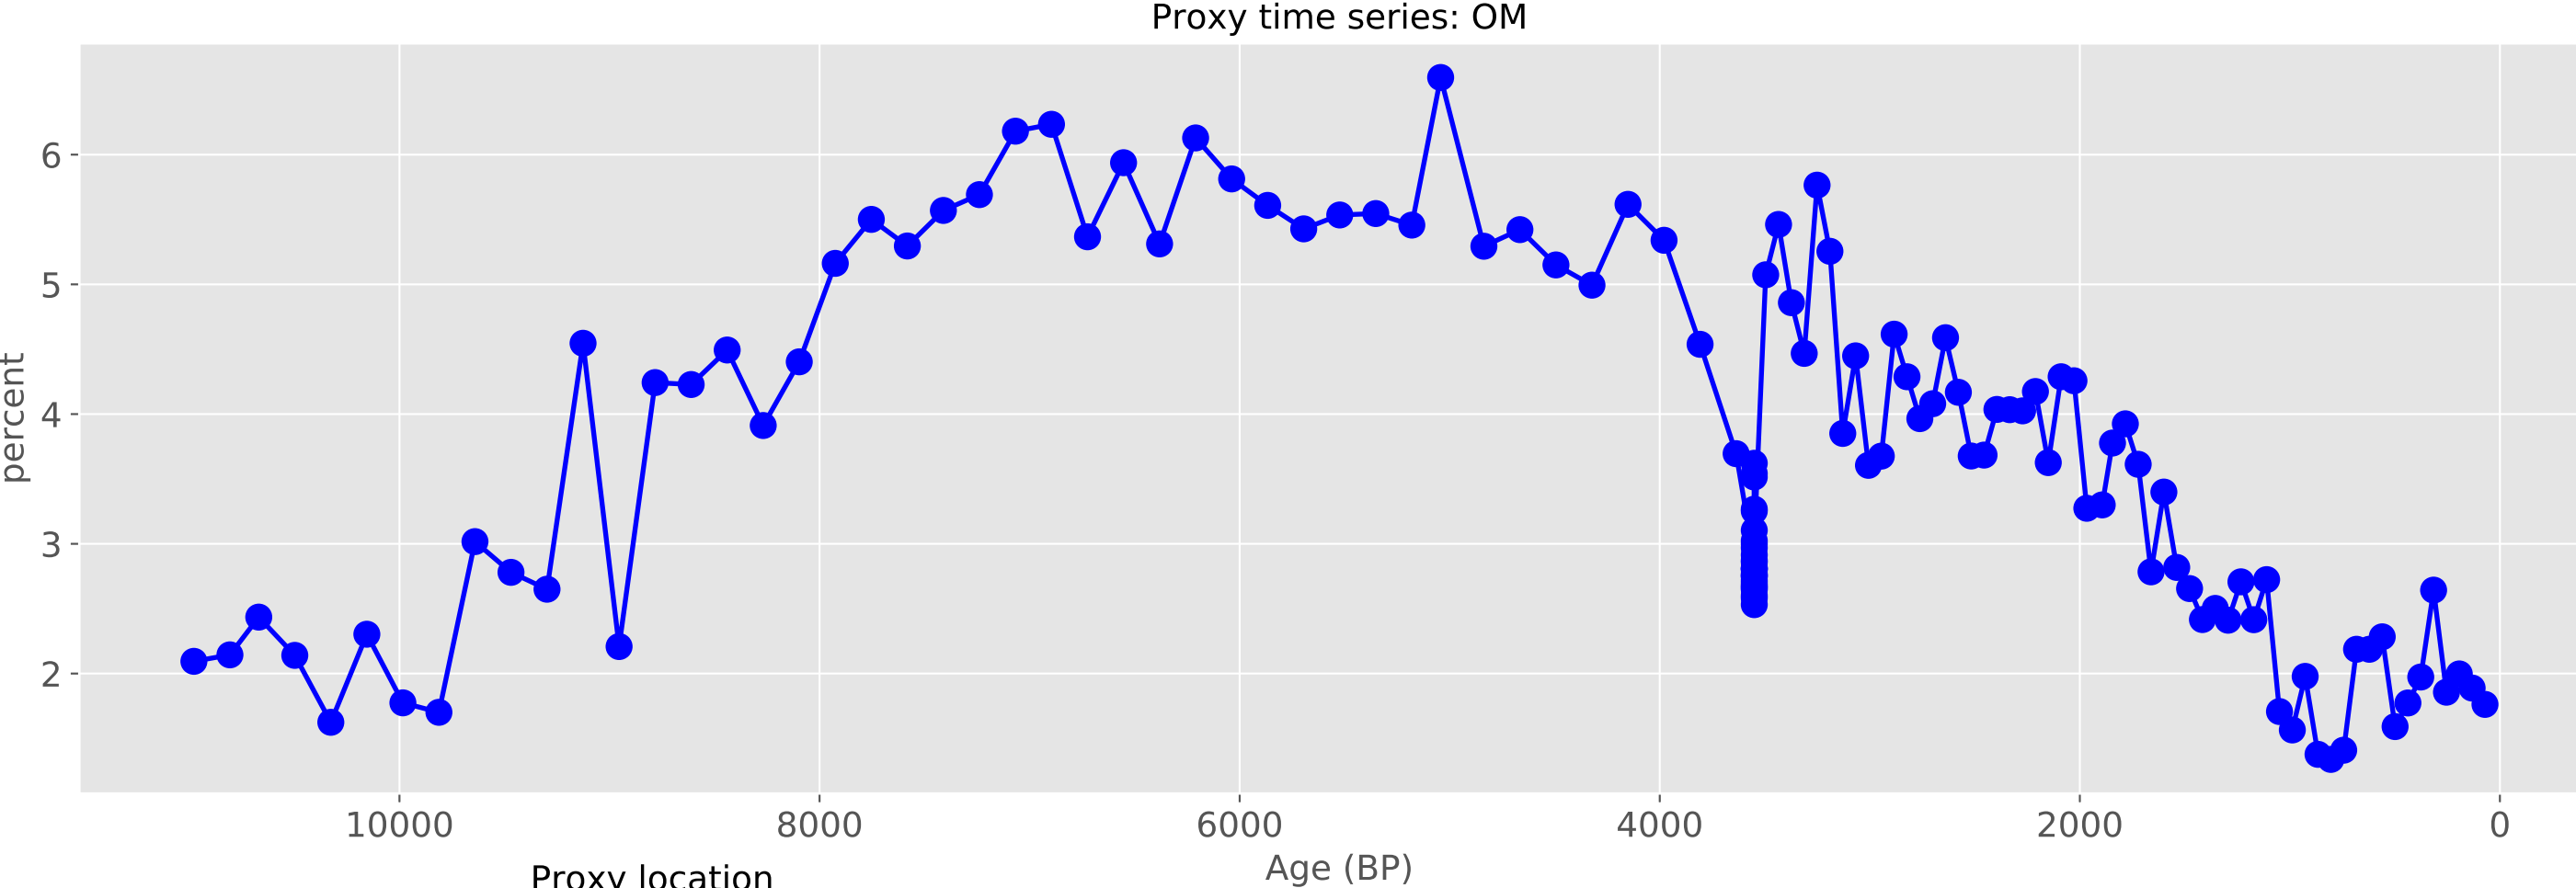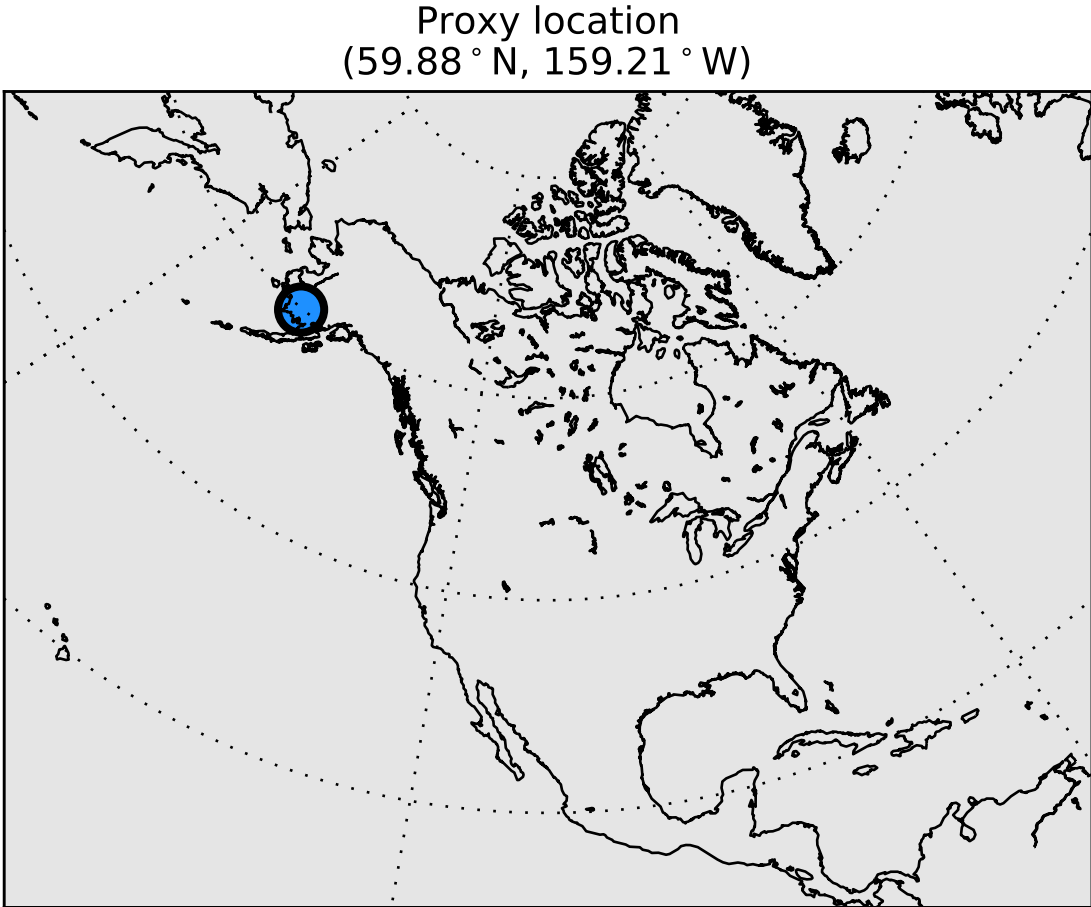

|                    |                                                                                              |
|--------------------|----------------------------------------------------------------------------------------------|
| Dataset name:      | Waskey.Levy.2004                                                                             |
| Archive type:      | LakeSediment                                                                                 |
| Proxy type:        | TOC                                                                                          |
| Variable name:     | OM                                                                                           |
| Latitude ( ° N):   | 59.8794                                                                                      |
| Longitude ( ° E):  | -159.2067                                                                                    |
| Elevation (m):     | 150.0                                                                                        |
| Interp. variable:  | T                                                                                            |
| Interp. detail:    | air@surface                                                                                  |
| Interp. season:    | summer+                                                                                      |
| Interp. direction: | positive                                                                                     |
| Pub. 1 title:      | Holocene glacier fluctuations, Waskey Lake, northe...                                        |
| Pub. 1 authors:    | Levy, Laura B.; Kaufman, Darrell S.; Werner, Al                                              |
| Pub. 1 year:       | 2004                                                                                         |
| Pub. 1 DOI:        | 10.1191/0959683604hl675rp                                                                    |
| Original data URL: | <a href="http://www.ncdc.noaa.gov/paleo/study/15444">www.ncdc.noaa.gov/paleo/study/15444</a> |

Proxy data and metadata  
**LakeSediment | TOC | LowerBearLake.Kirby.2012 | GH44c0a9bf**

Proxy time series: LOI

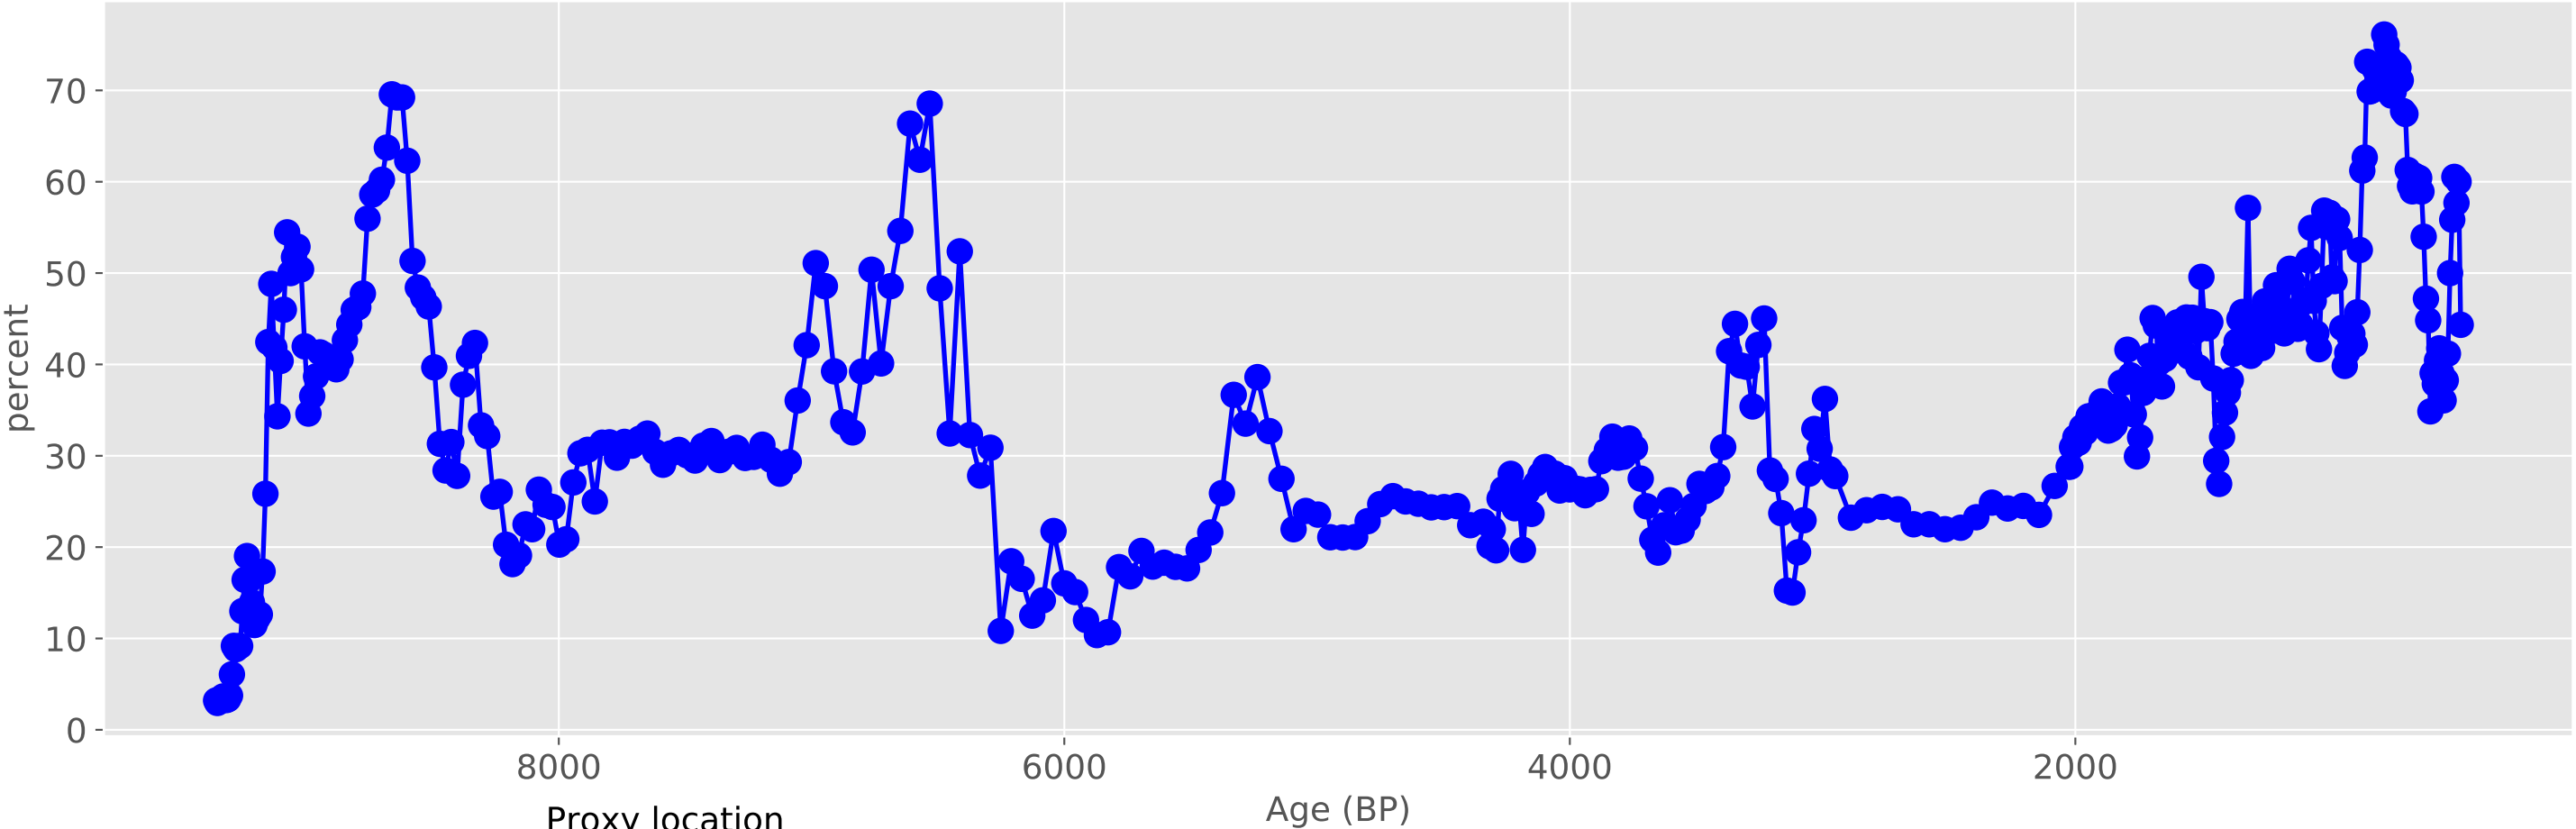

Proxy location  
(34.20 ° N, 116.90 ° W)



|                    |                                                                                              |
|--------------------|----------------------------------------------------------------------------------------------|
| Dataset name:      | LowerBearLake.Kirby.2012                                                                     |
| Archive type:      | LakeSediment                                                                                 |
| Proxy type:        | TOC                                                                                          |
| Variable name:     | LOI                                                                                          |
| Latitude ( ° N):   | 34.2                                                                                         |
| Longitude ( ° E):  | -116.9                                                                                       |
| Elevation (m):     | 2059.0                                                                                       |
| Interp. variable:  | P                                                                                            |
| Interp. detail:    | runoff@surface                                                                               |
| Interp. season:    | annual                                                                                       |
| Interp. direction: | positive                                                                                     |
| Pub. 1 title:      | A 9170-year record of decadal-to-multi-centennial ...                                        |
| Pub. 1 authors:    | Kirby, Matthew E.;Zimmerman, Susan R.H.;Patterson,...                                        |
| Pub. 1 year:       | 2012                                                                                         |
| Pub. 1 DOI:        | 10.1016/j.quascirev.2012.05.008                                                              |
| Original data URL: | <a href="http://www.ncdc.noaa.gov/paleo/study/13215">www.ncdc.noaa.gov/paleo/study/13215</a> |

Proxy data and metadata  
LakeSediment | varve | Minucua.Goman.2018 | WEBae63e2cc

Proxy time series: Varve\_width

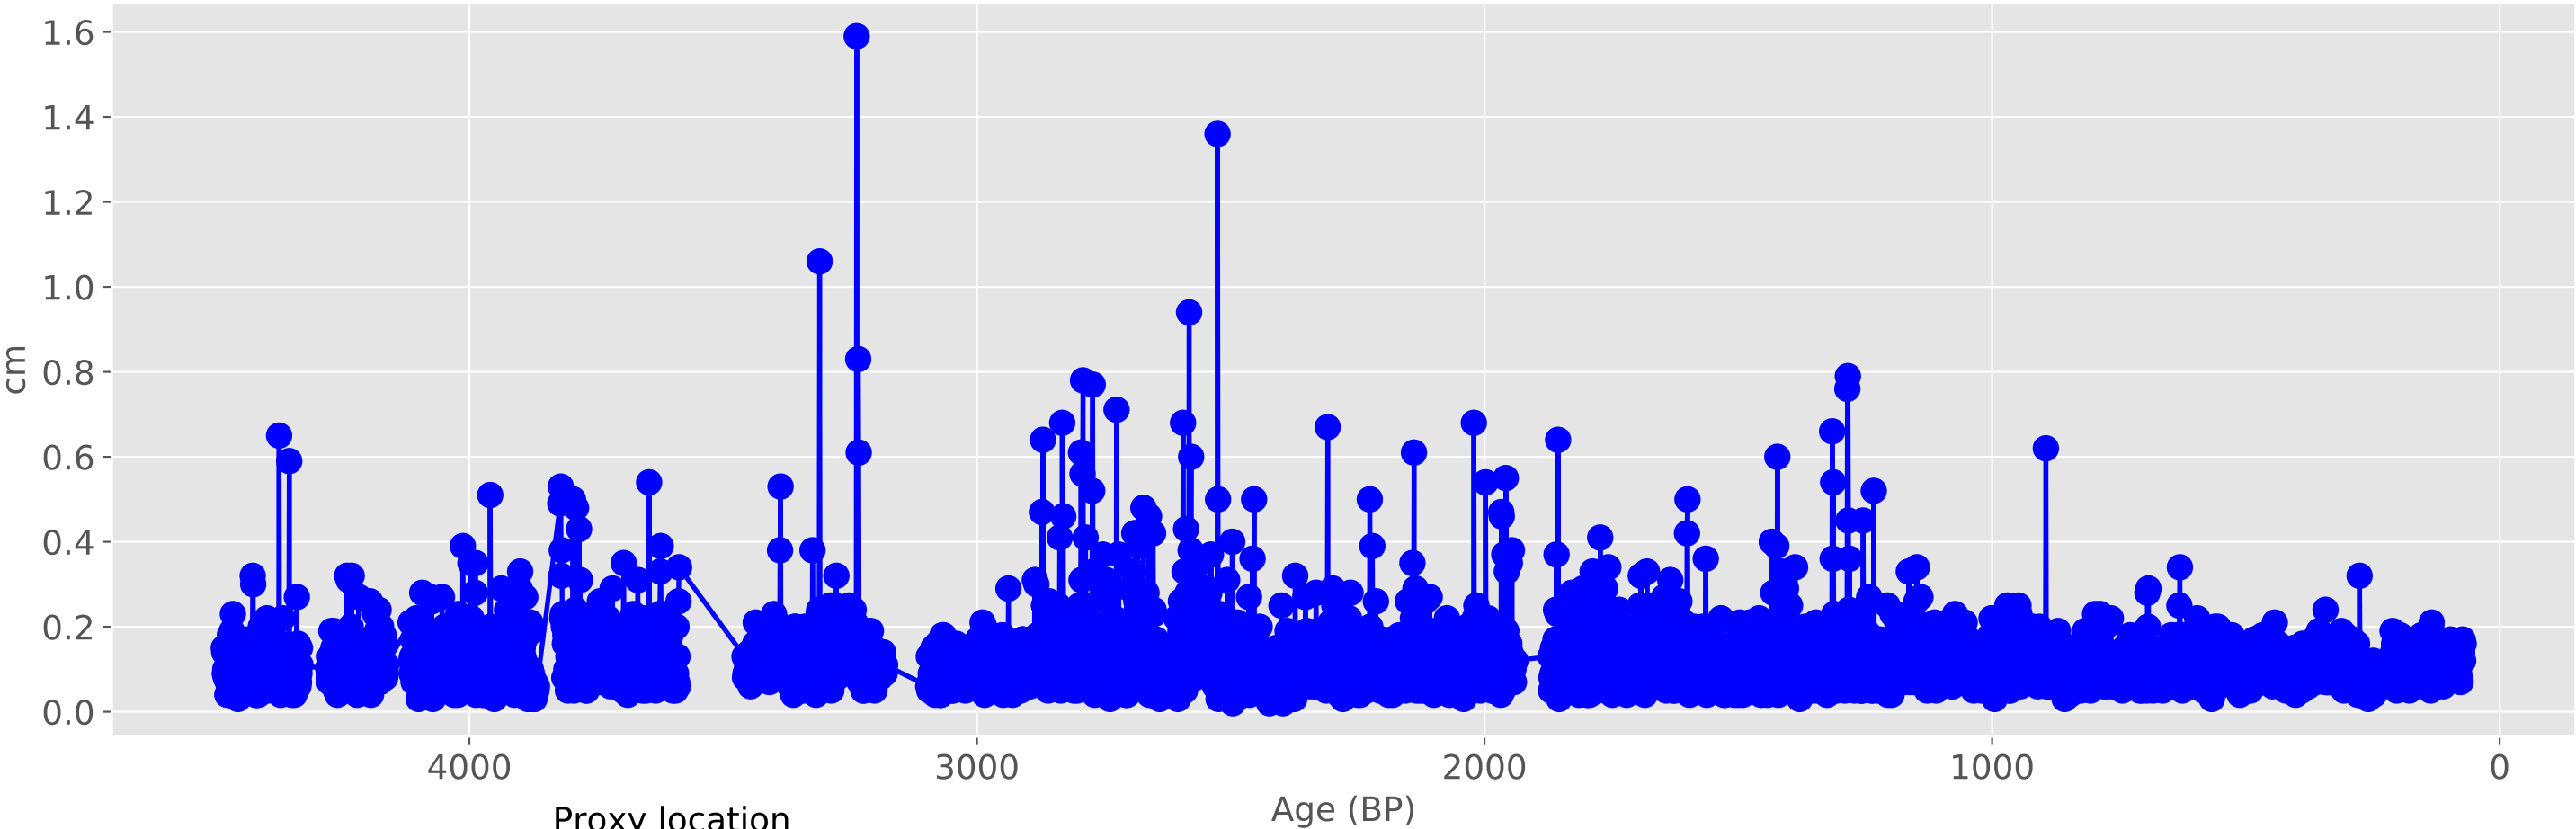

Proxy location  
(17.08 ° N, 97.61 ° W)

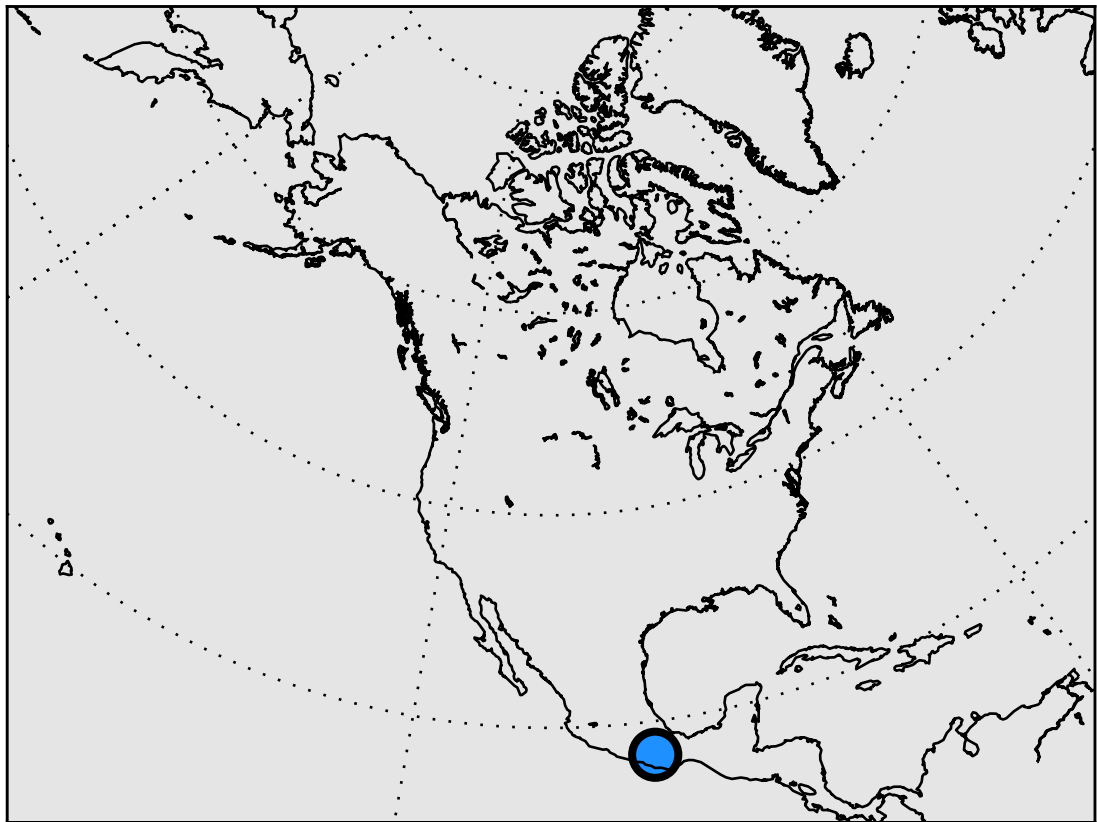

|                    |                                                       |
|--------------------|-------------------------------------------------------|
| Dataset name:      | Minucua.Goman.2018                                    |
| Archive type:      | LakeSediment                                          |
| Proxy type:        | varve                                                 |
| Variable name:     | Varve_width                                           |
| Latitude ( ° N):   | 17.079                                                |
| Longitude ( ° E):  | -97.609                                               |
| Elevation (m):     | 2510.0                                                |
| Interp. variable:  | P                                                     |
| Interp. detail:    | runoff@surface                                        |
| Interp. season:    | annual                                                |
| Interp. direction: | positive                                              |
| Pub. 1 title:      | Preliminary results from Laguna Minucúa: a potenti... |
| Pub. 1 authors:    | Goman, Michelle;Joyce, Arthur;Lund, Steve;Pearson,... |
| Pub. 1 year:       | 2018                                                  |
| Pub. 1 DOI:        | 10.1016/j.quaint.2017.01.027                          |
| Original data URL: | wNAm                                                  |

Proxy data and metadata

loess | partical size | Chitina.Muhs.2013 | WEB0f8ede48

Proxy time series: DMAR

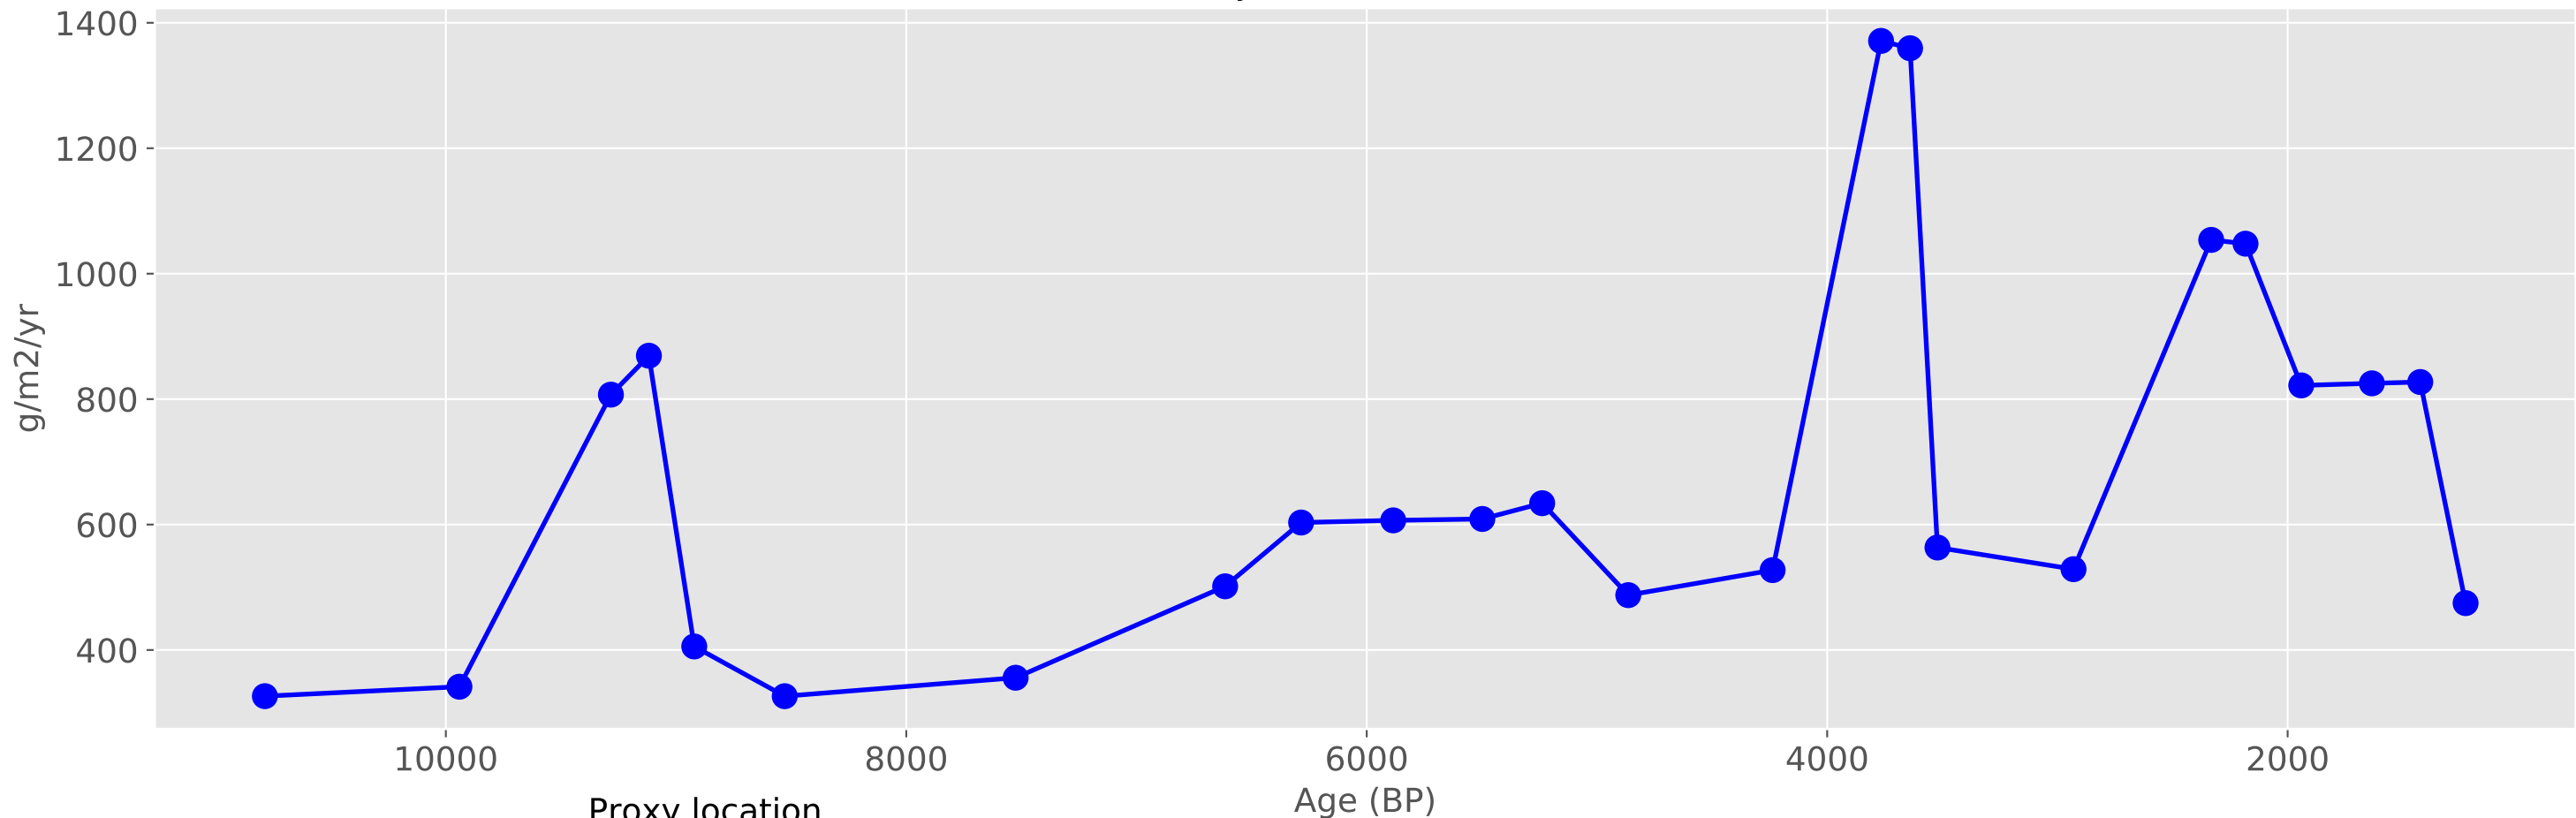

Proxy location  
(61.54 ° N, 144.38 ° W)

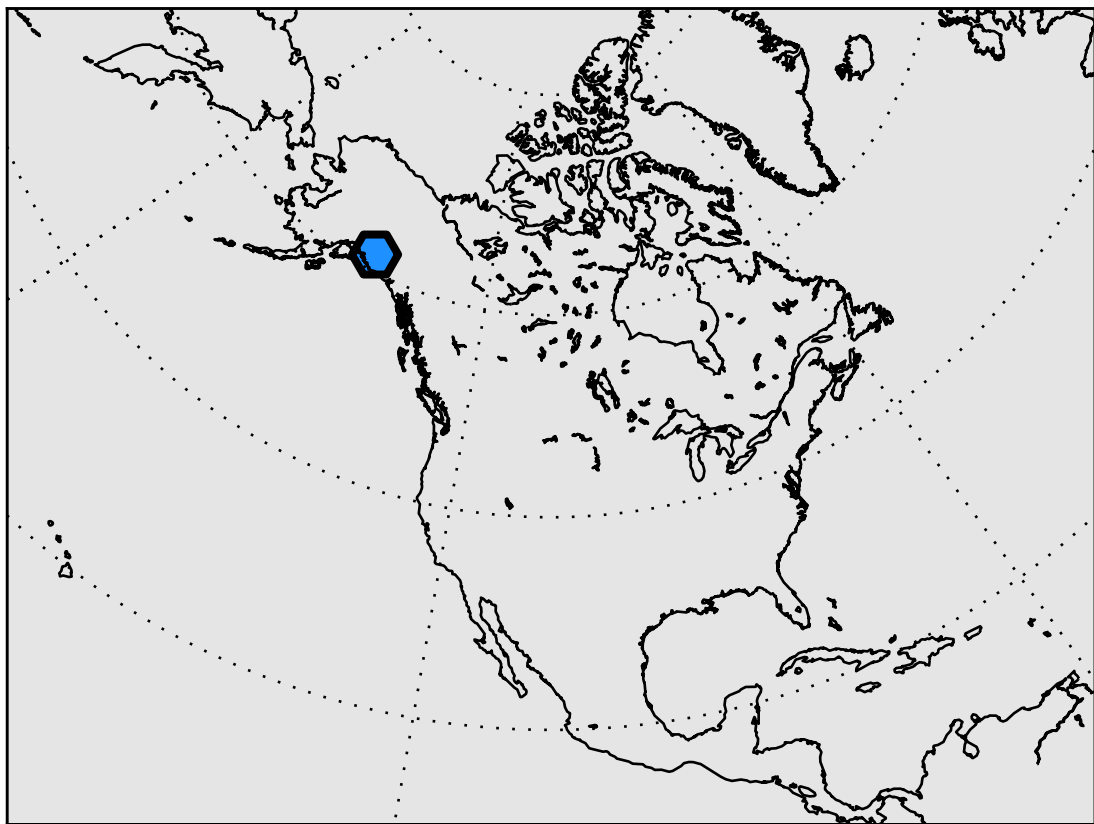

|                    |                                                                                                       |
|--------------------|-------------------------------------------------------------------------------------------------------|
| Dataset name:      | Chitina.Muhs.2013                                                                                     |
| Archive type:      | loess                                                                                                 |
| Proxy type:        | partical size                                                                                         |
| Variable name:     | DMAR                                                                                                  |
| Latitude ( ° N):   | 61.54                                                                                                 |
| Longitude ( ° E):  | -144.38                                                                                               |
| Elevation (m):     | 150.0                                                                                                 |
| Interp. variable:  | DUST                                                                                                  |
| Interp. detail:    | @surface                                                                                              |
| Interp. season:    | annual                                                                                                |
| Interp. direction: | positive                                                                                              |
| Pub. 1 title:      | Loess origin, transport, and deposition over the p...                                                 |
| Pub. 1 authors:    | Muhs, Daniel R.;Budahn, James R.;McGeehin, John P....                                                 |
| Pub. 1 year:       | 2013                                                                                                  |
| Pub. 1 DOI:        | 10.1016/j.aeolia.2013.06.001                                                                          |
| Original data URL: | <a href="https://www.ncdc.noaa.gov/paleo/study/20529">https://www.ncdc.noaa.gov/paleo/study/20529</a> |

Proxy data and metadata

MarineSediment | alkenone | EW0408\_85JC.Praetorius.2015 | T2L\_EW0408\_85JC\_uk37\_SST\_from\_uk37

Proxy time series: temperature

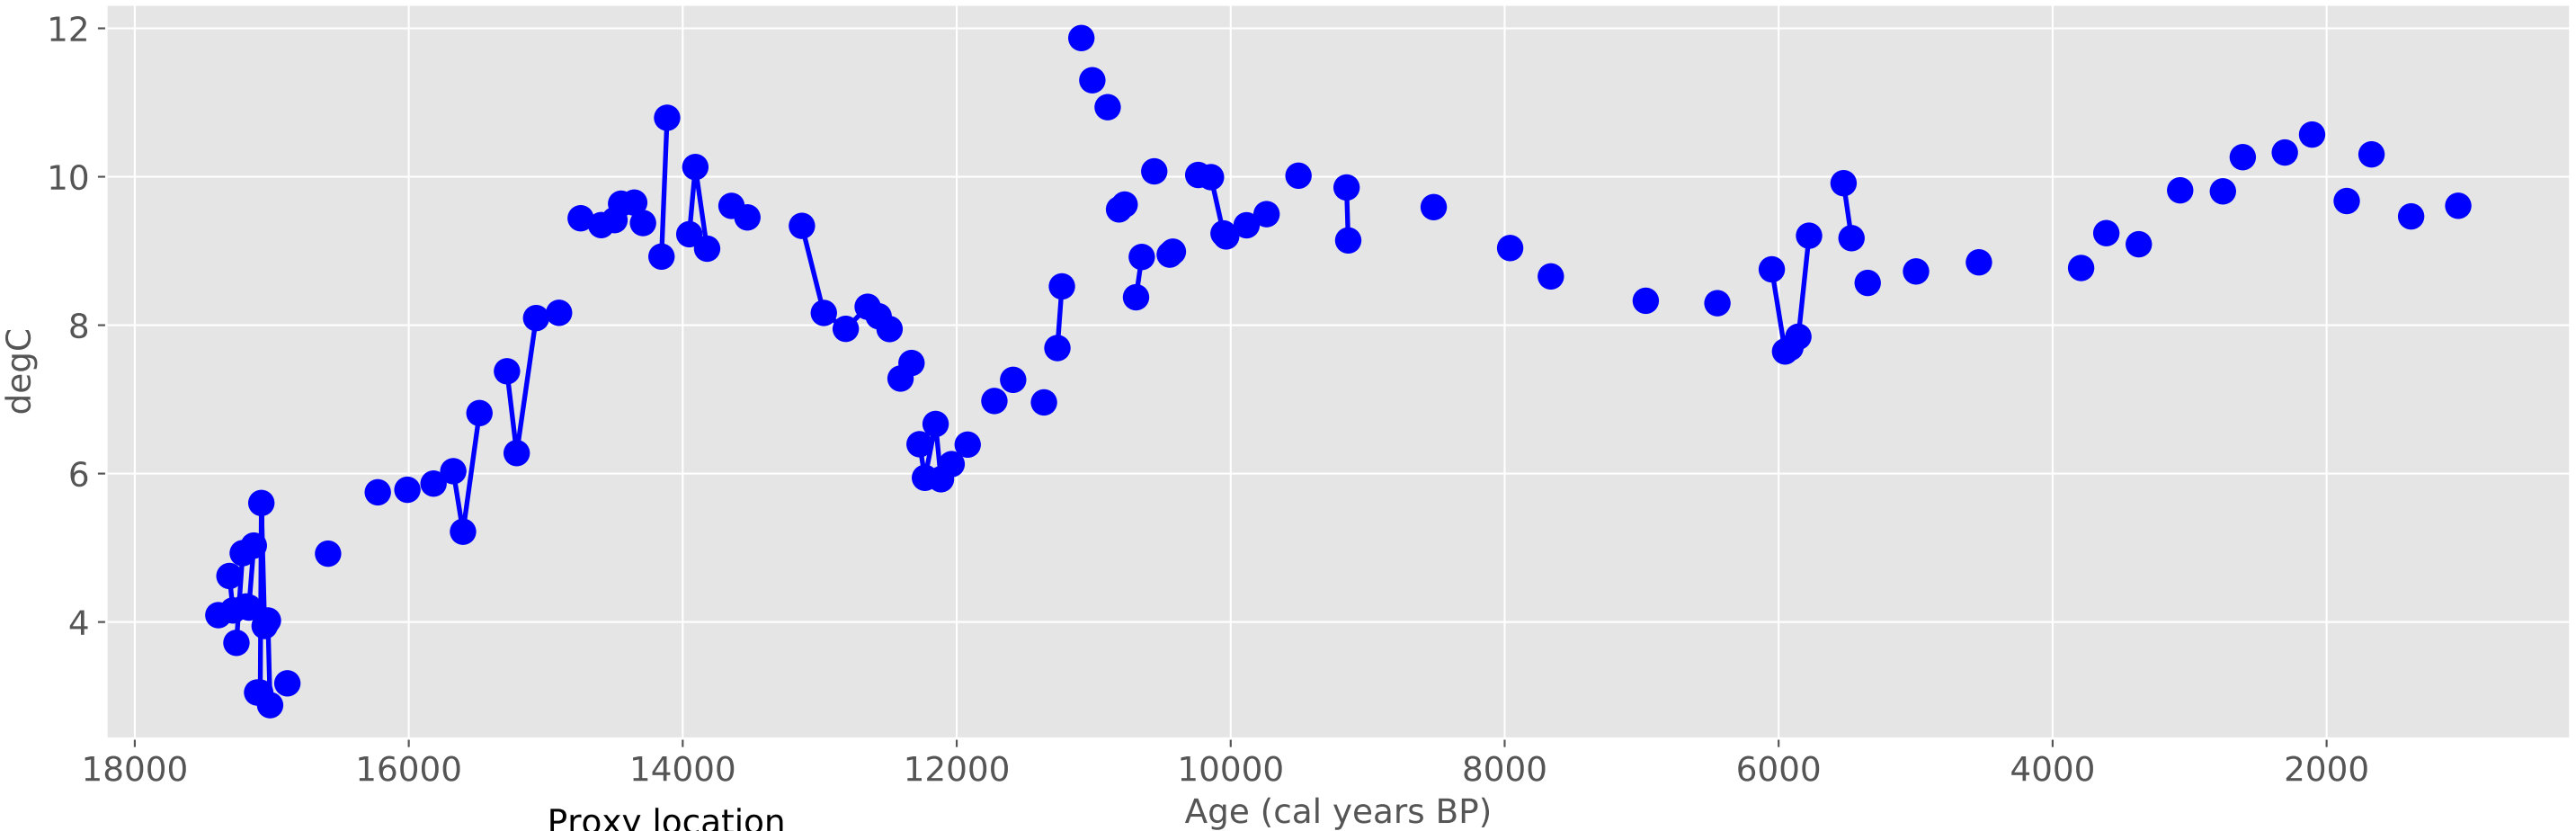

Proxy location  
(59.56 ° N, 144.15 ° W)

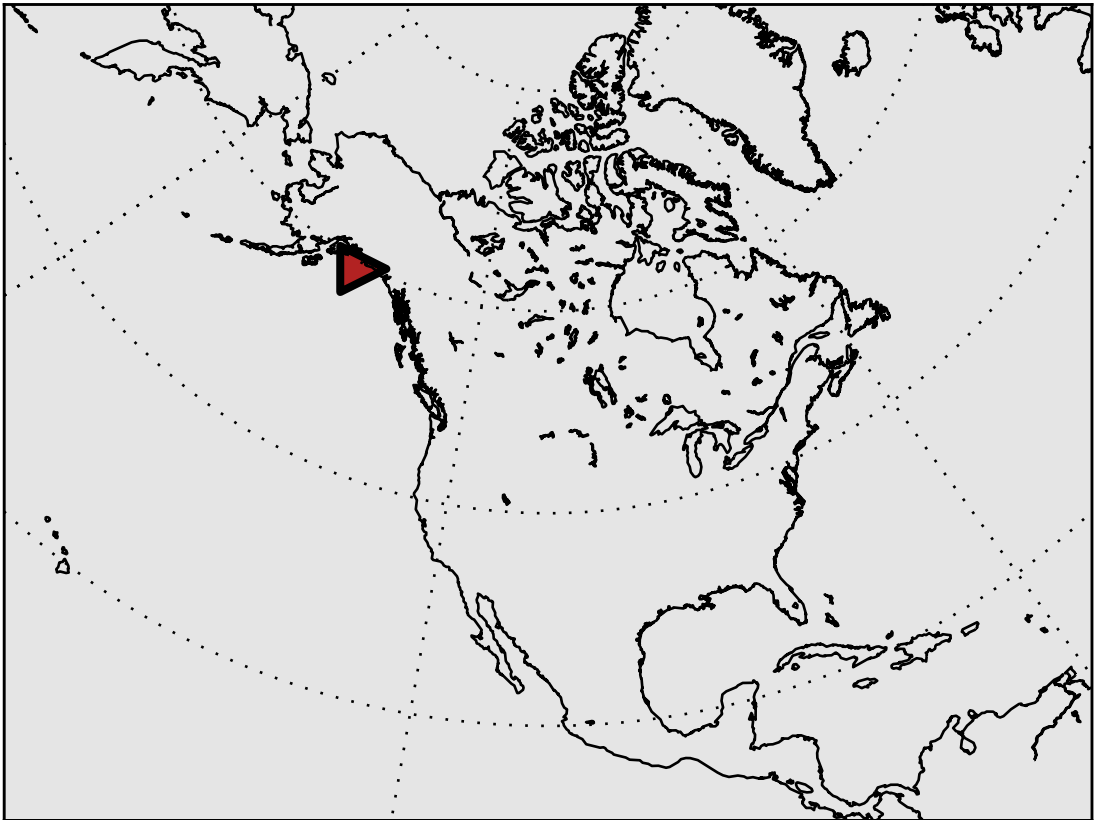

|                    |                                                       |
|--------------------|-------------------------------------------------------|
| Dataset name:      | EW0408_85JC.Praetorius.2015                           |
| Archive type:      | MarineSediment                                        |
| Proxy type:        | alkenone                                              |
| Variable name:     | temperature                                           |
| Latitude ( ° N):   | 59.5554                                               |
| Longitude ( ° E):  | -144.1535                                             |
| Elevation (m):     | -682.0                                                |
| Interp. variable:  | T                                                     |
| Interp. detail:    | sea@surface                                           |
| Interp. season:    | summerOnly                                            |
| Interp. direction: | positive                                              |
| Pub. 1 title:      | North Pacific deglacial hypoxic events linked to a... |
| Pub. 1 authors:    | Praetorius, S. K.; Mix, A. C.; Walczak, M. H.; Wol... |
| Pub. 1 year:       | 2015                                                  |
| Pub. 1 DOI:        | 10.1038/nature15753                                   |
| Original data URL: | www.ncdc.noaa.gov/paleo/study/21950                   |

Proxy data and metadata

MarineSediment | alkenone | EW0408-87JC.Praetorius.2020 | WEB768f9819

Proxy time series: temperature

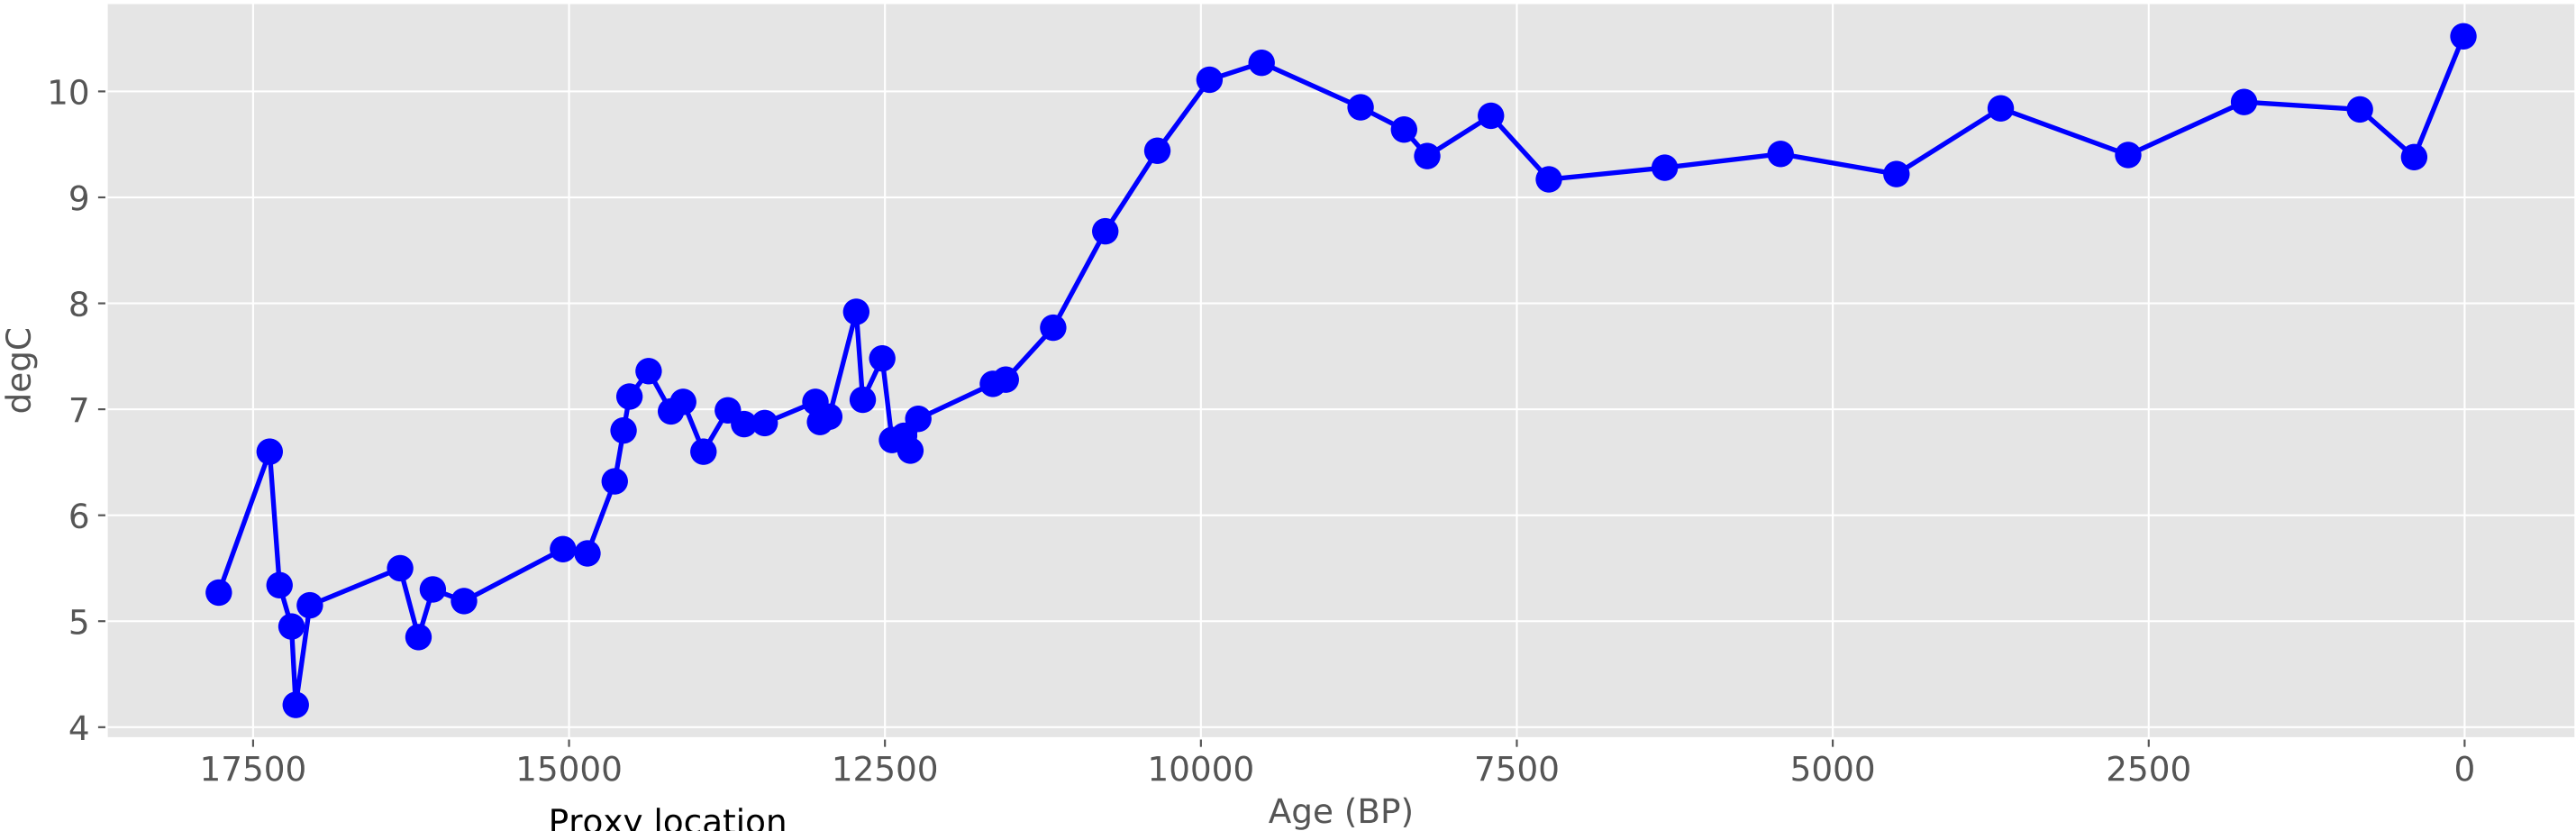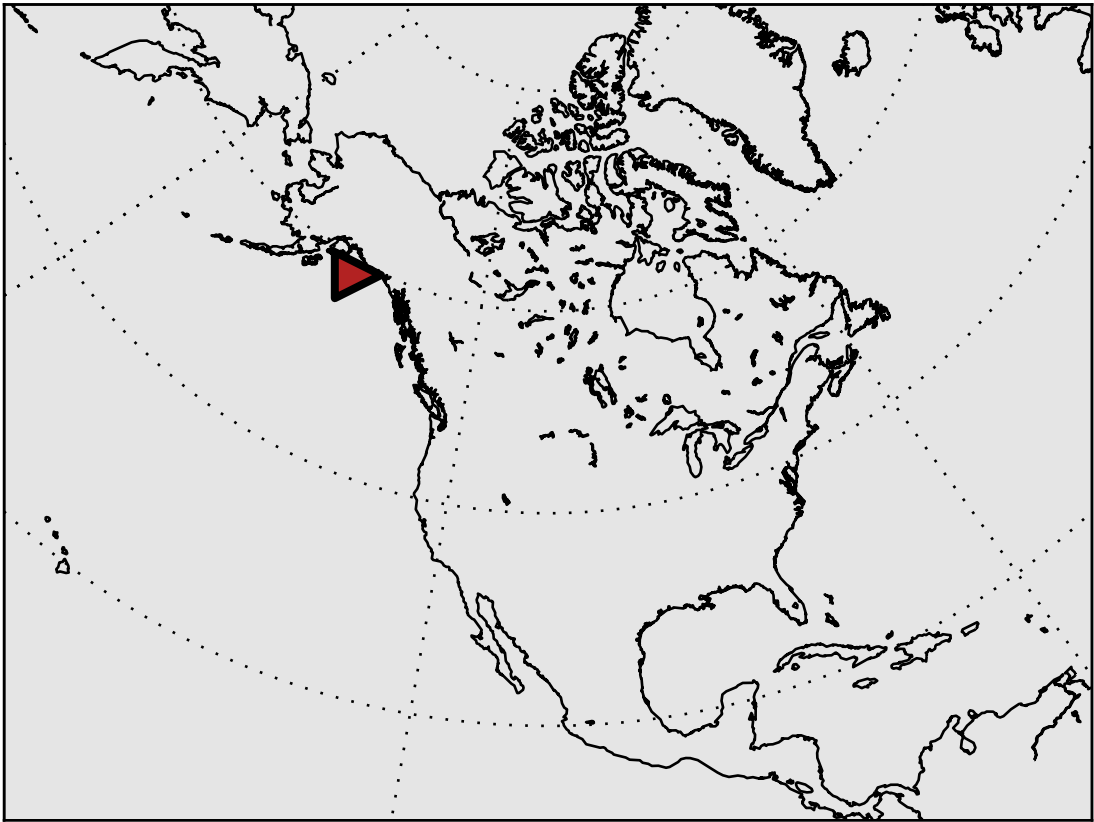

|                    |                                                       |
|--------------------|-------------------------------------------------------|
| Dataset name:      | EW0408-87JC.Praetorius.2020                           |
| Archive type:      | MarineSediment                                        |
| Proxy type:        | alkenone                                              |
| Variable name:     | temperature                                           |
| Latitude ( ° N):   | 58.77                                                 |
| Longitude ( ° E):  | -144.5                                                |
| Elevation (m):     | 3680.0                                                |
| Interp. variable:  | T                                                     |
| Interp. detail:    | sea@surface                                           |
| Interp. season:    | annual                                                |
| Interp. direction: | positive                                              |
| Pub. 1 title:      | The role of Northeast Pacific meltwater events in ... |
| Pub. 1 authors:    | Praetorius, Summer K.                                 |
| Pub. 1 year:       | 2020                                                  |
| Pub. 1 DOI:        | 10.1126/sciadv.aay2915                                |
| Original data URL: | wNAm                                                  |



Proxy data and metadata

MarineSediment | alkenone | EW0408\_66JC.Praetorius.2015 | T2L\_EW0408\_66JC\_uk37\_SST\_from\_uk37

Proxy time series: temperature

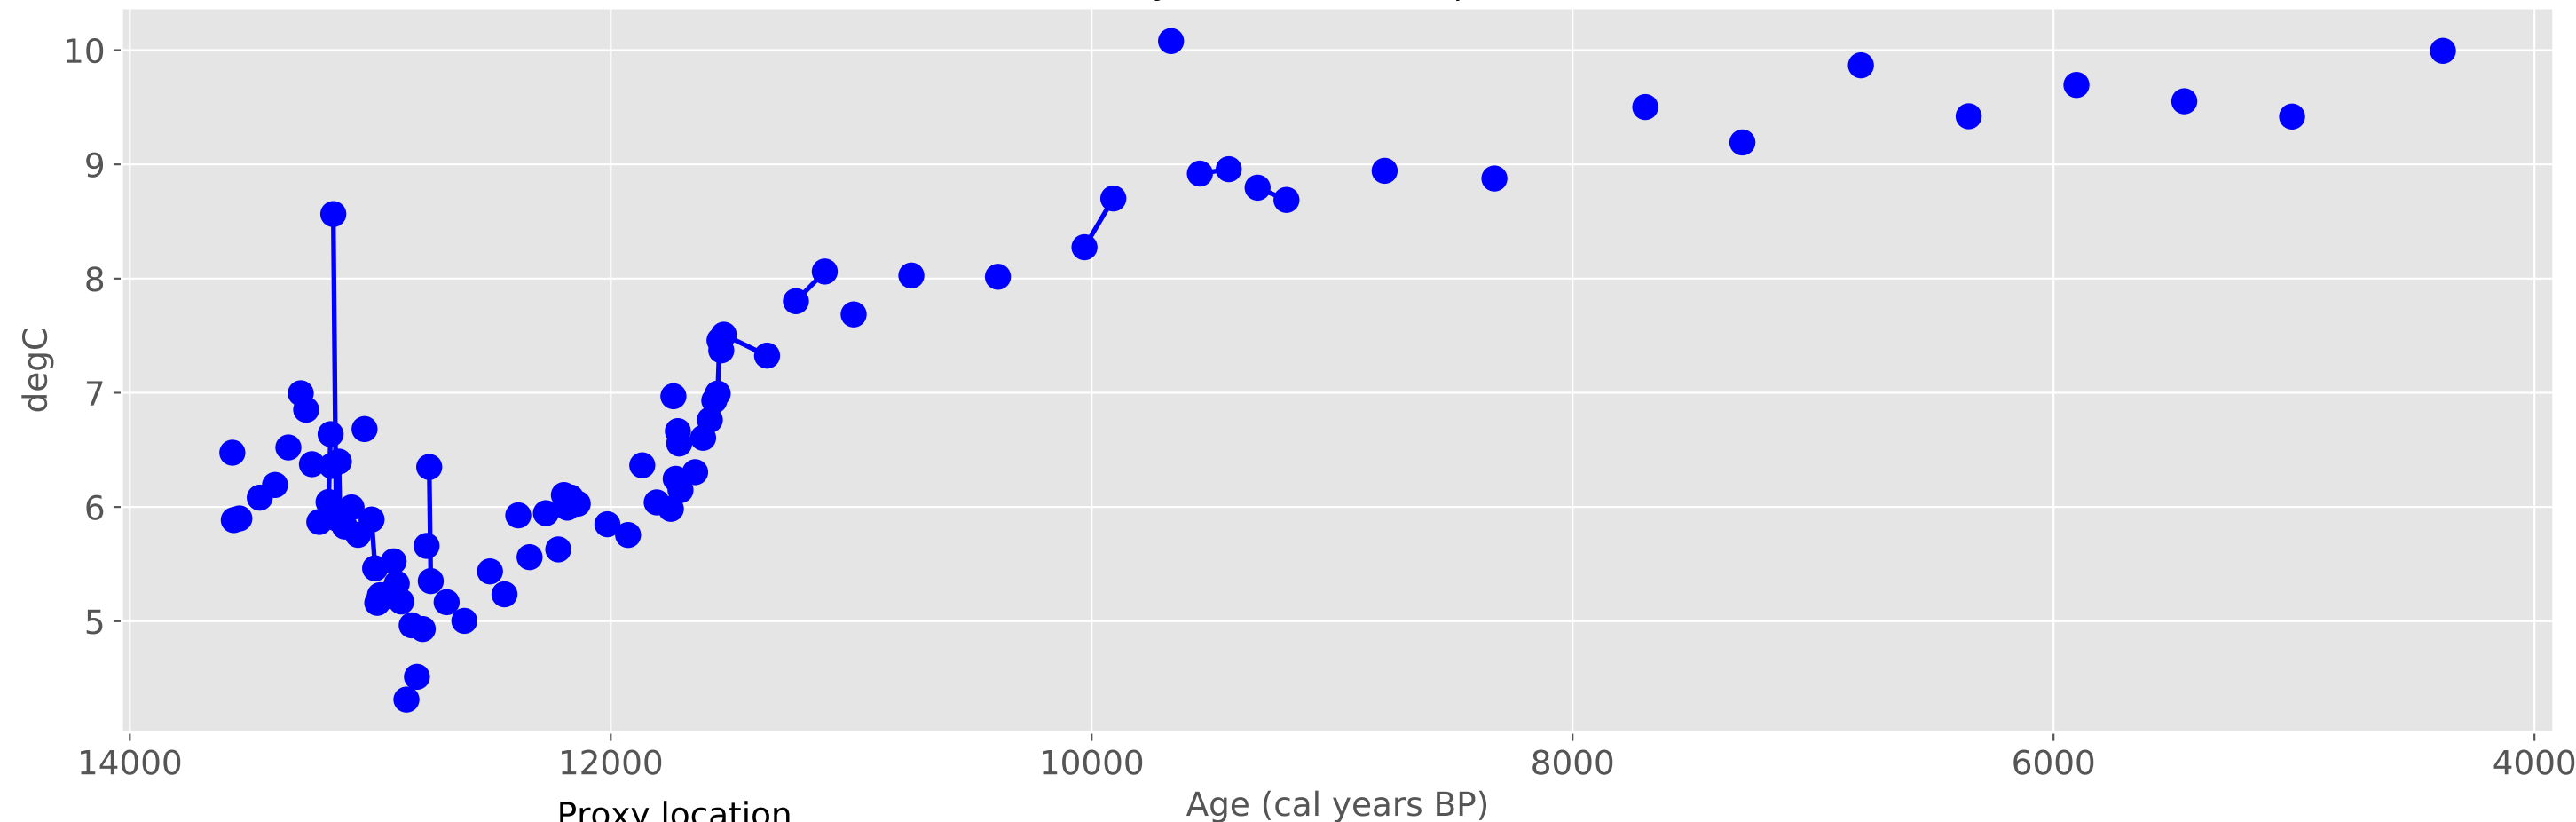

Proxy location  
(57.87° N, 137.10° W)

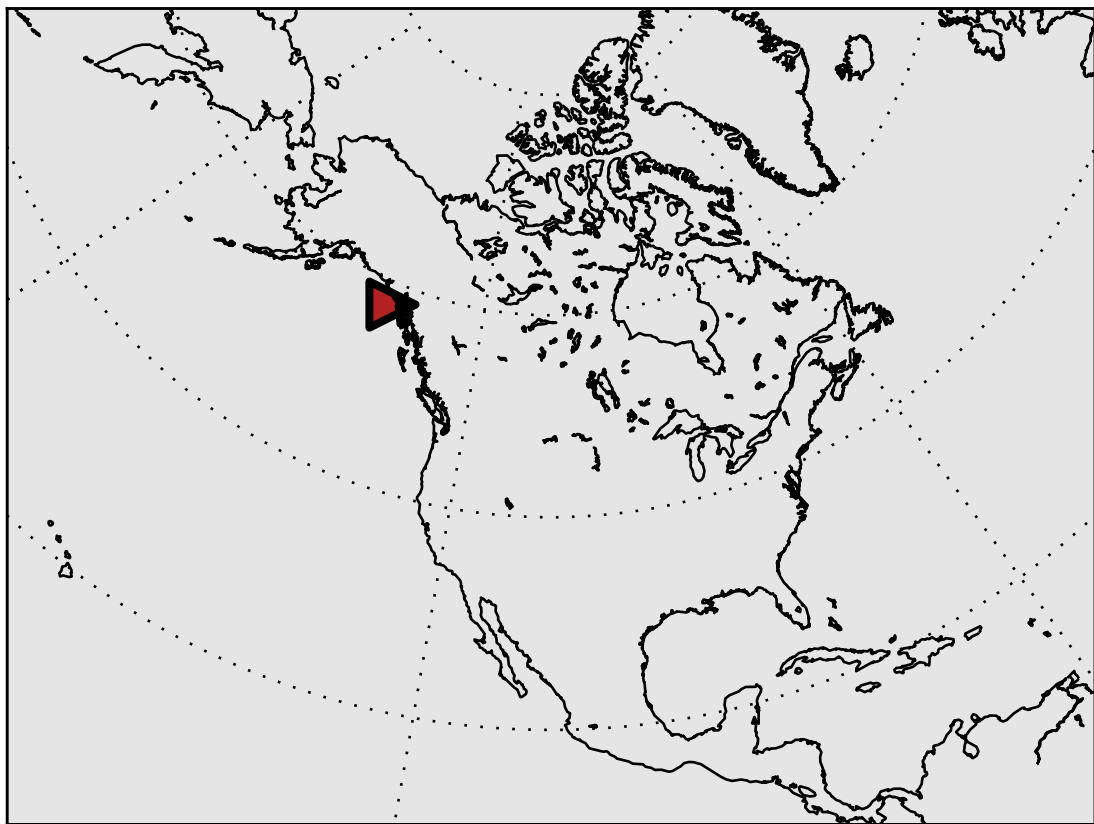

|                    |                                                                                              |
|--------------------|----------------------------------------------------------------------------------------------|
| Dataset name:      | EW0408_66JC.Praetorius.2015                                                                  |
| Archive type:      | MarineSediment                                                                               |
| Proxy type:        | alkenone                                                                                     |
| Variable name:     | temperature                                                                                  |
| Latitude (° N):    | 57.8724                                                                                      |
| Longitude (° E):   | -137.1045                                                                                    |
| Elevation (m):     | -426.0                                                                                       |
| Interp. variable:  | T                                                                                            |
| Interp. detail:    | sea@surface                                                                                  |
| Interp. season:    | summerOnly                                                                                   |
| Interp. direction: | positive                                                                                     |
| Pub. 1 title:      | North Pacific deglacial hypoxic events linked to a...                                        |
| Pub. 1 authors:    | Praetorius, S. K.; Mix, A. C.; Walczak, M. H.; Wol...                                        |
| Pub. 1 year:       | 2015                                                                                         |
| Pub. 1 DOI:        | 10.1038/nature15753                                                                          |
| Original data URL: | <a href="http://www.ncdc.noaa.gov/paleo/study/22400">www.ncdc.noaa.gov/paleo/study/22400</a> |

Proxy data and metadata

MarineSediment | alkenone | ODP\_167\_1019C.Barron.2003 | T2L\_ODP\_167\_1019C\_uk37\_SST\_from\_uk37

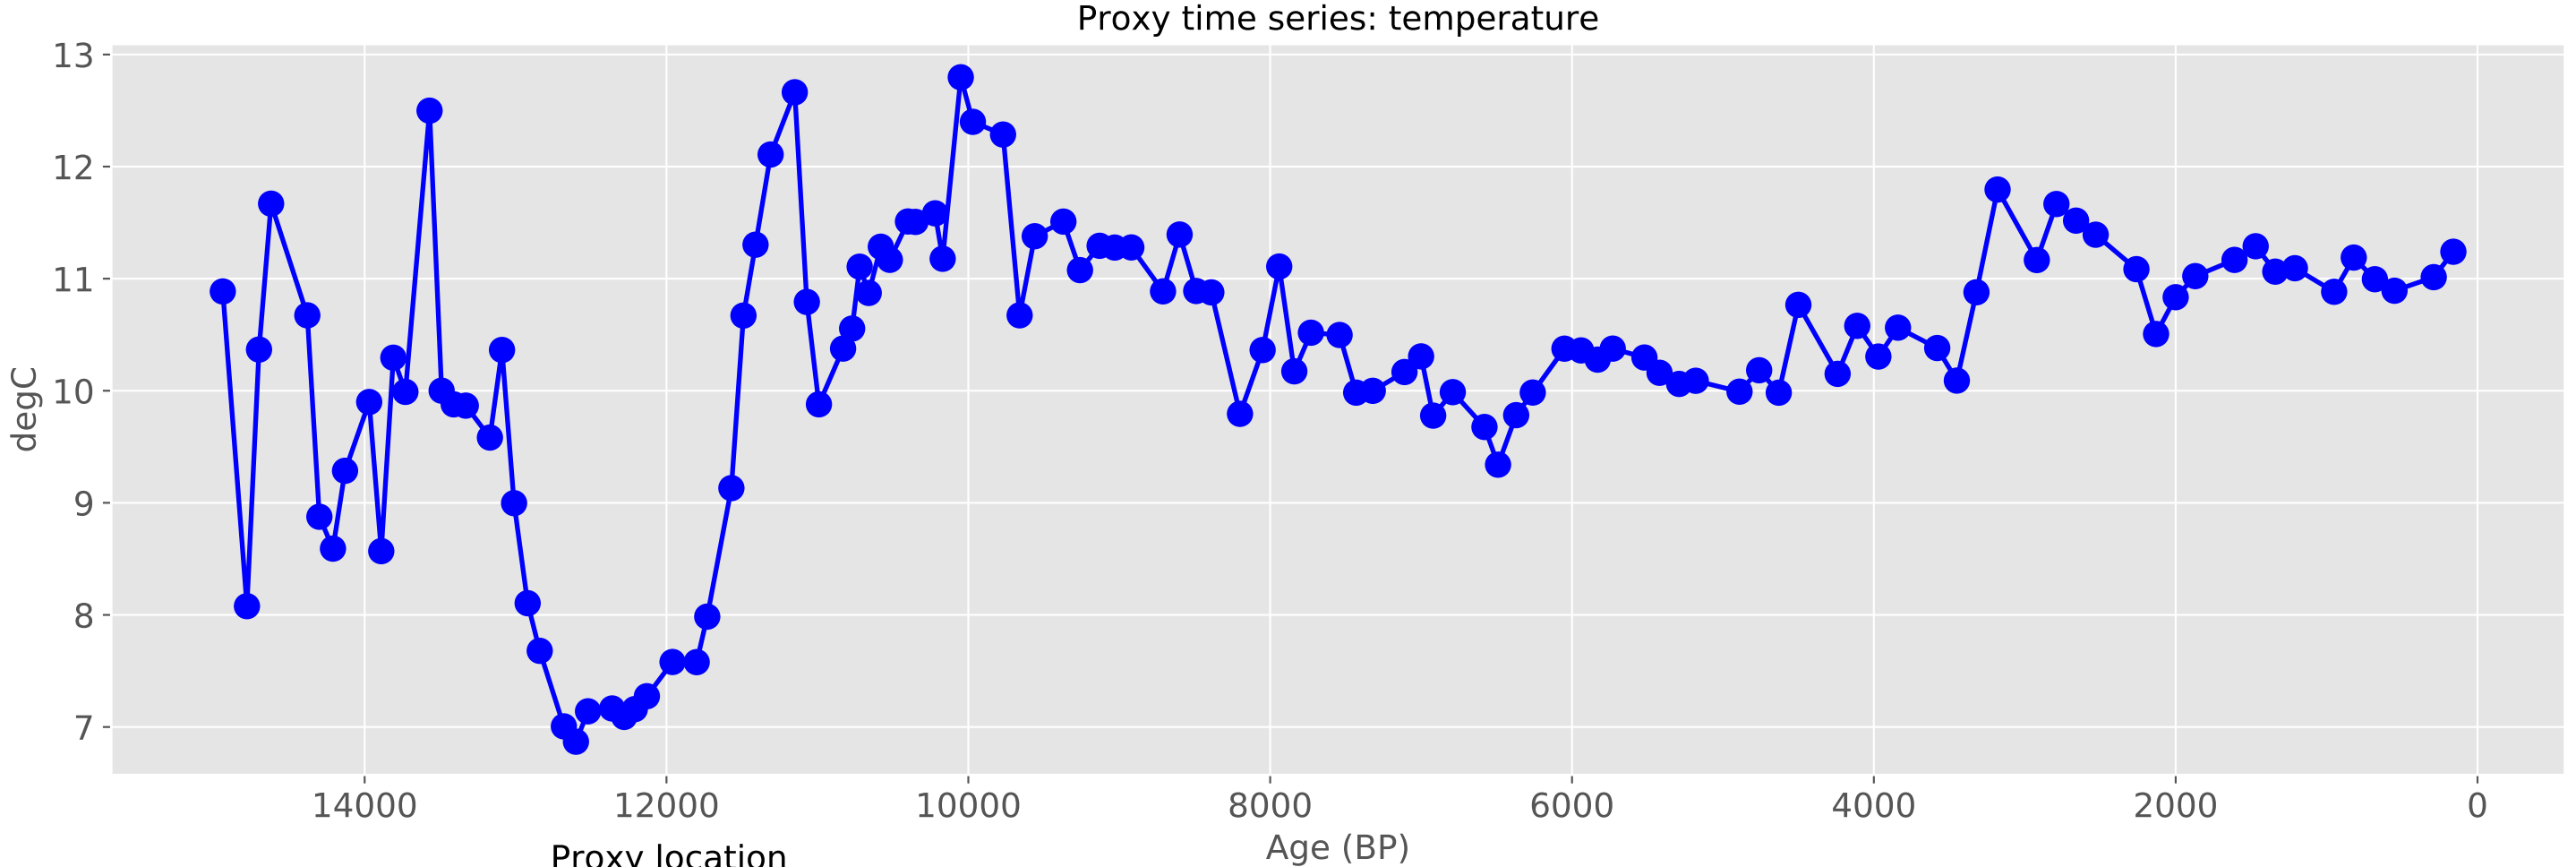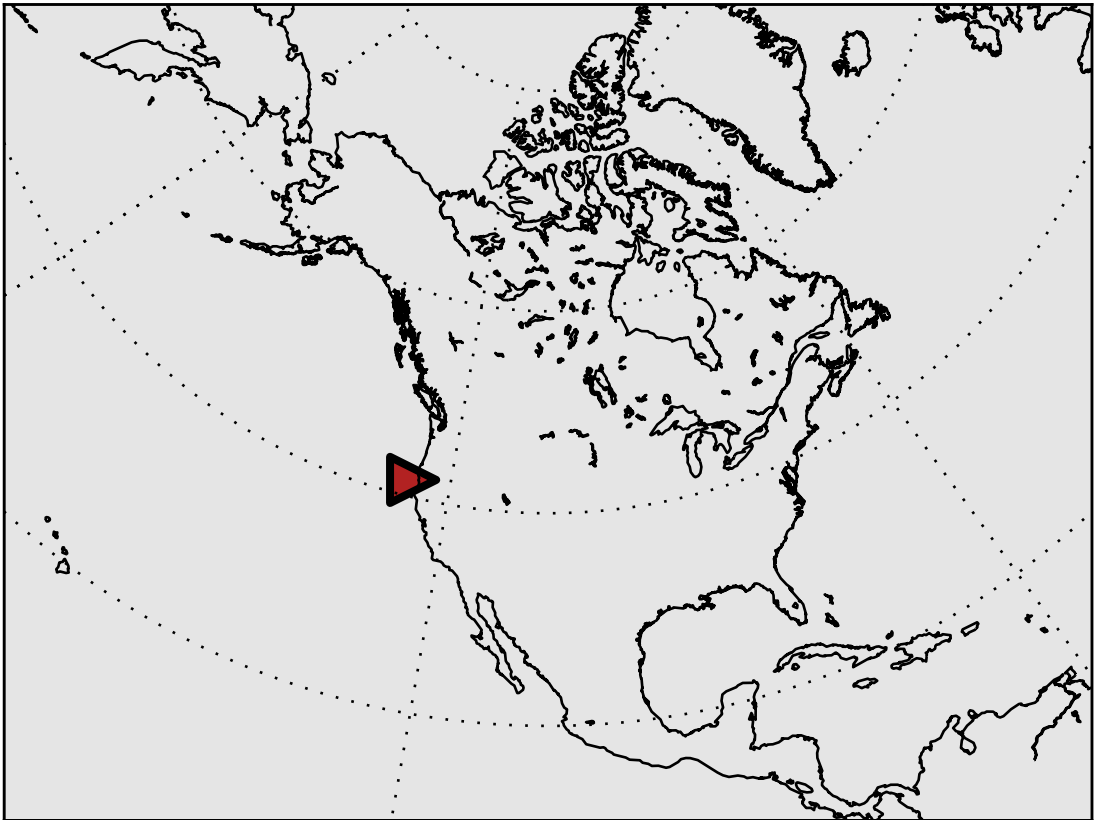

|                    |                                                       |
|--------------------|-------------------------------------------------------|
| Dataset name:      | ODP_167_1019C.Barron.2003                             |
| Archive type:      | MarineSediment                                        |
| Proxy type:        | alkenone                                              |
| Variable name:     | temperature                                           |
| Latitude ( ° N):   | 41.6829                                               |
| Longitude ( ° E):  | -124.932                                              |
| Elevation (m):     | -946.0                                                |
| Interp. variable:  | T                                                     |
| Interp. detail:    | sea@surface                                           |
| Interp. season:    | annual                                                |
| Interp. direction: | positive                                              |
| Pub. 1 title:      | High-resolution climatic evolution of coastal nort... |
| Pub. 1 authors:    | Barron, John A.; Heusser, Linda; Herbert, Timothy;... |
| Pub. 1 year:       | 2003                                                  |
| Pub. 1 DOI:        | 10.1029/2002PA000768                                  |
| Original data URL: | 10.1594/PANGAEA.841946                                |

Proxy data and metadata

MarineSediment | alkenone | MD02\_2515.McClymont.2012 | T2L\_MD02\_2515\_uk37\_SST\_from\_uk37

Proxy time series: temperature

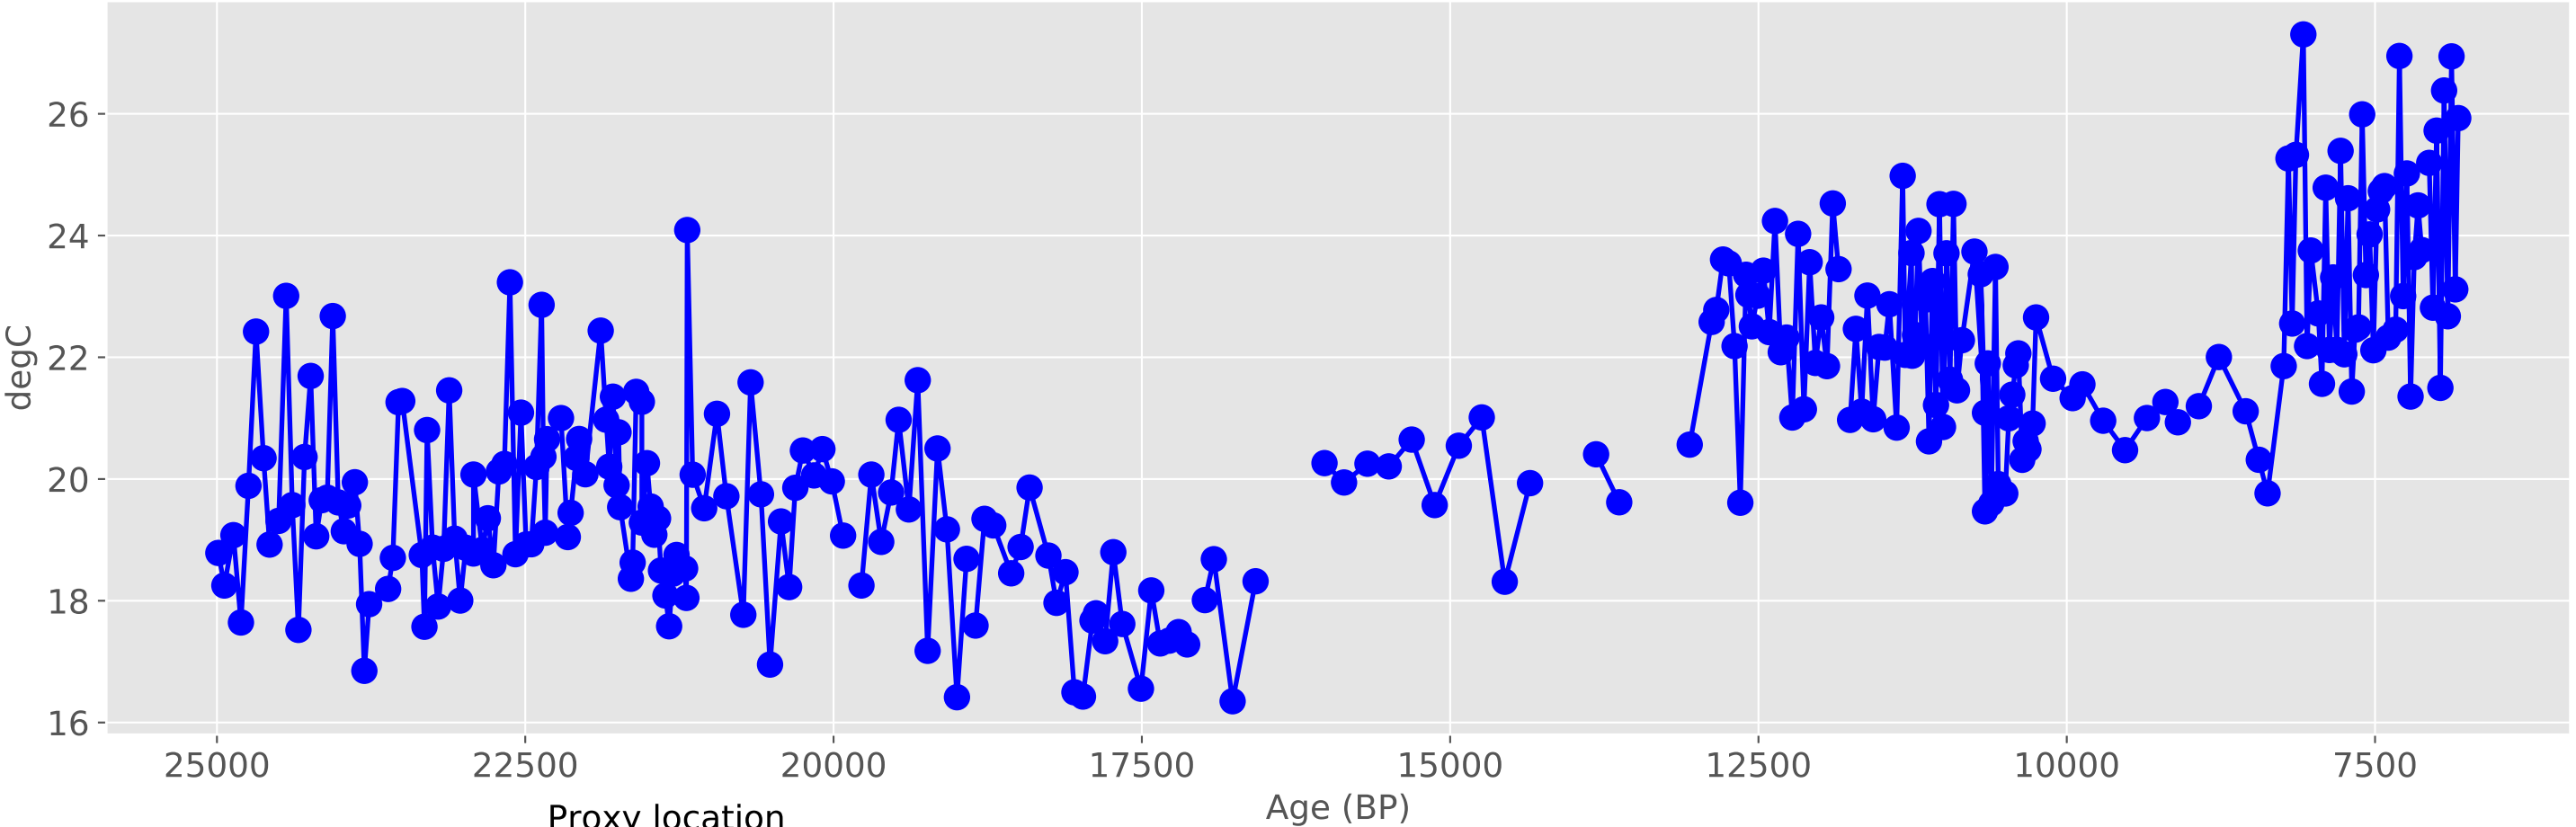

Proxy location  
(27.48° N, 112.07° W)

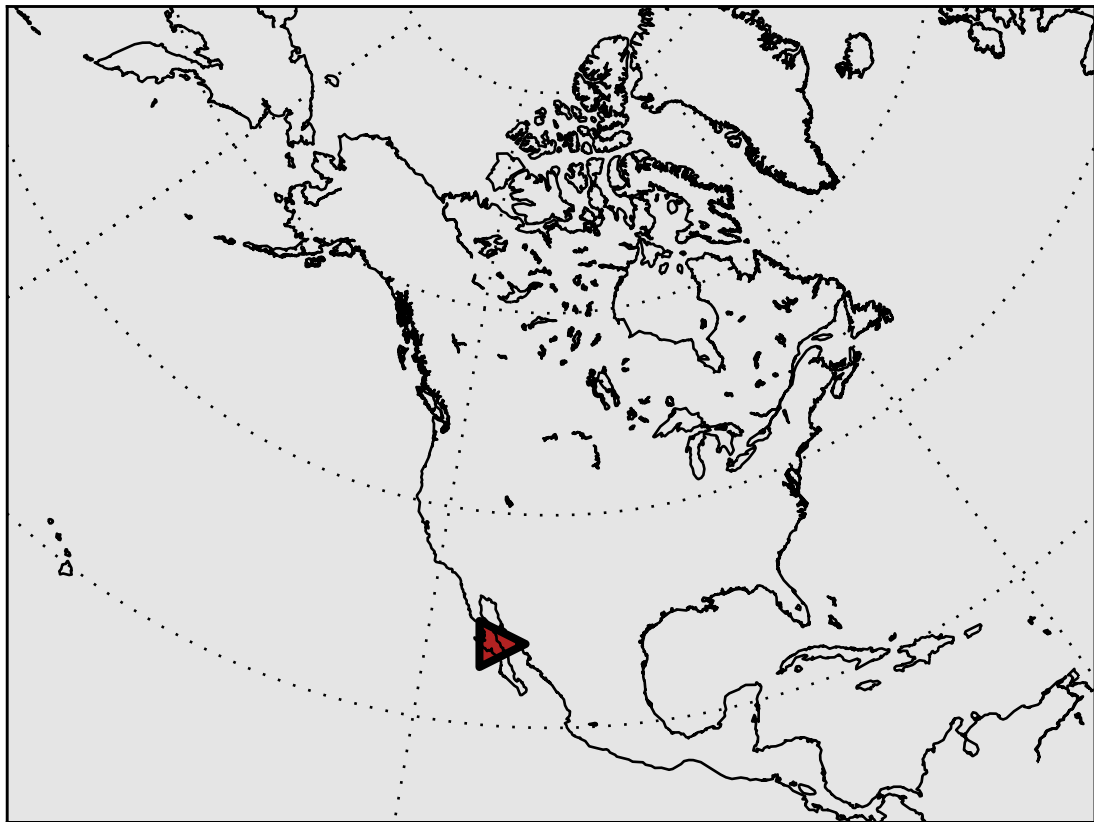

|                    |                                                       |
|--------------------|-------------------------------------------------------|
| Dataset name:      | MD02_2515.McClymont.2012                              |
| Archive type:      | MarineSediment                                        |
| Proxy type:        | alkenone                                              |
| Variable name:     | temperature                                           |
| Latitude (° N):    | 27.4835                                               |
| Longitude (° E):   | -112.0743                                             |
| Elevation (m):     | -881.0                                                |
| Interp. variable:  | T                                                     |
| Interp. detail:    | sea@surface                                           |
| Interp. season:    | annual                                                |
| Interp. direction: | positive                                              |
| Pub. 1 title:      | Sea-surface temperature records of Termination 1 i... |
| Pub. 1 authors:    | McClymont, Erin L.; Ganeshram, Raja S.; Pichevin, ... |
| Pub. 1 year:       | 2012                                                  |
| Pub. 1 DOI:        | 10.1029/2011PA002226                                  |
| Original data URL: | 10.1594/PANGAEA.861260                                |

Proxy data and metadata  
MarineSediment | BSi | DSDP480.Barron.2004 | LPD3a4d6b46

Proxy time series: BSi

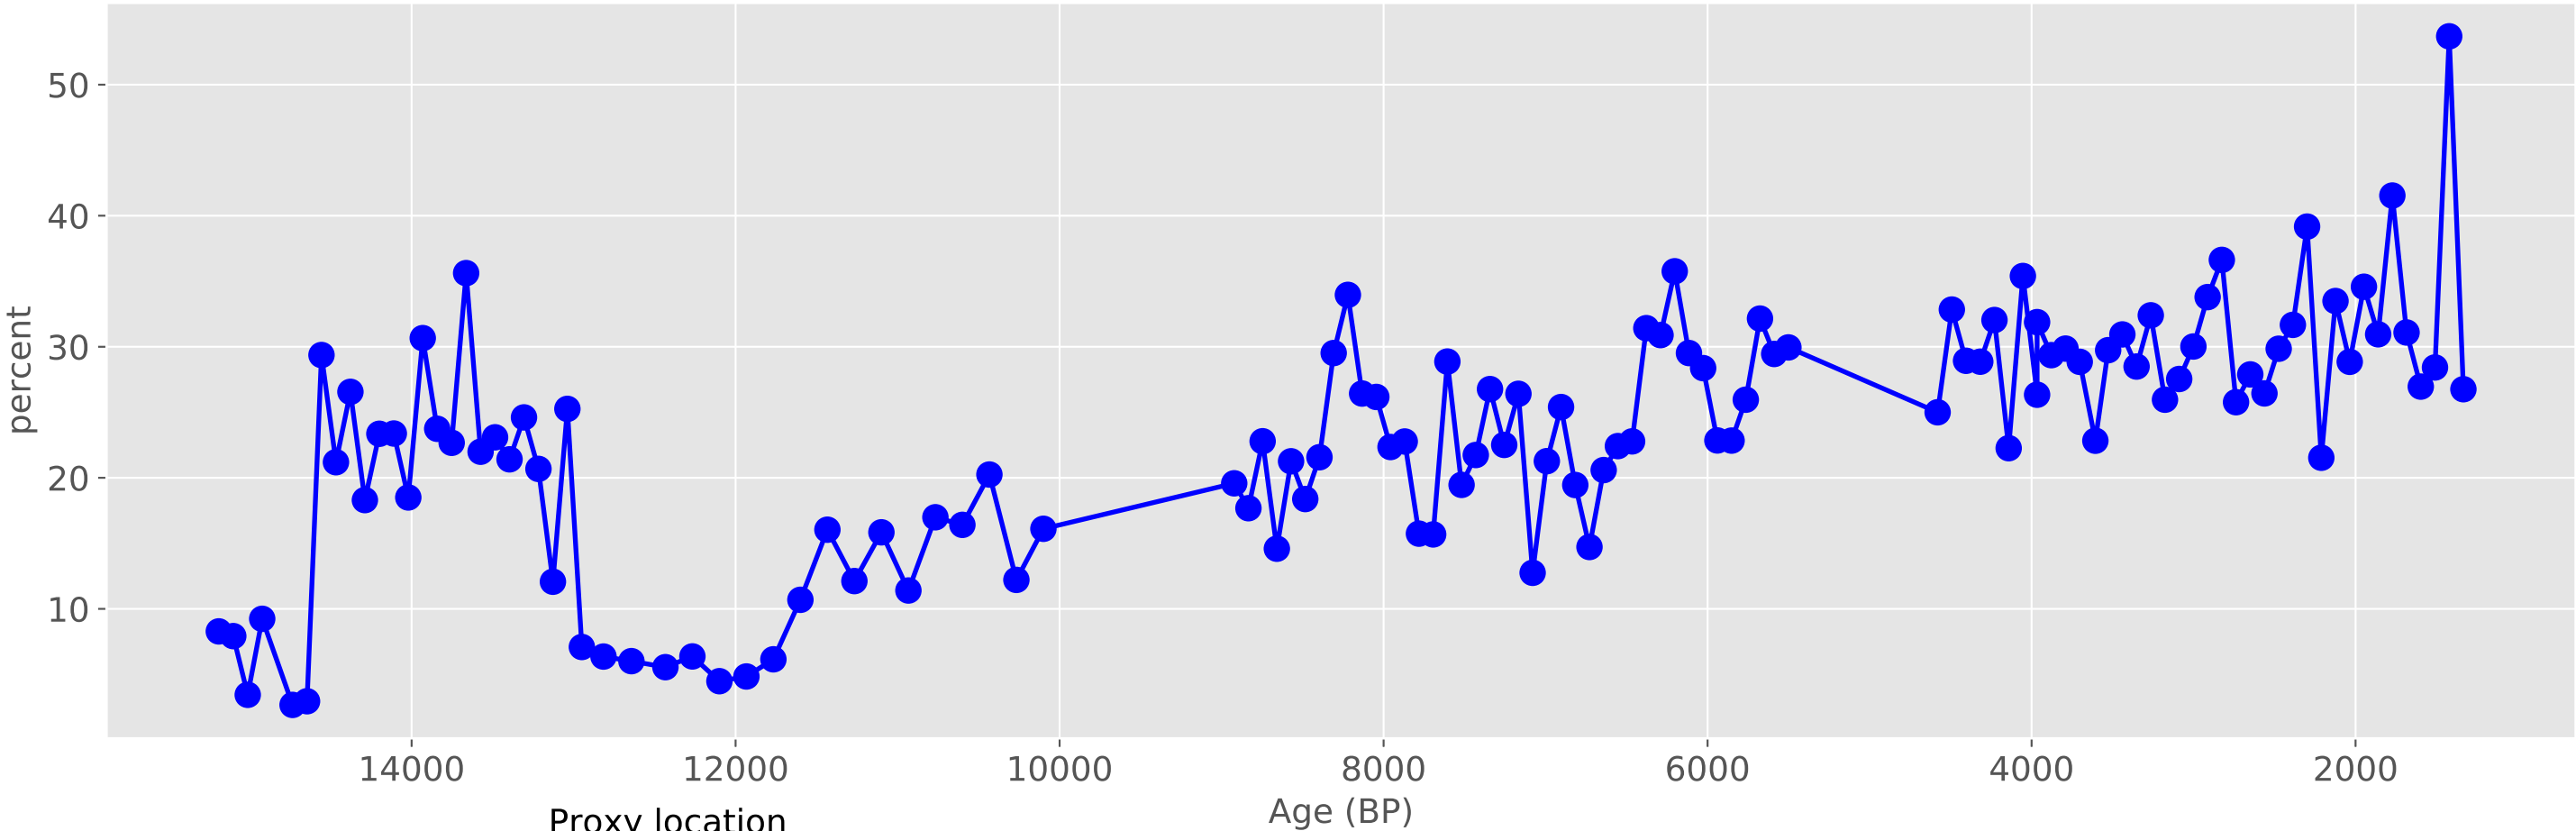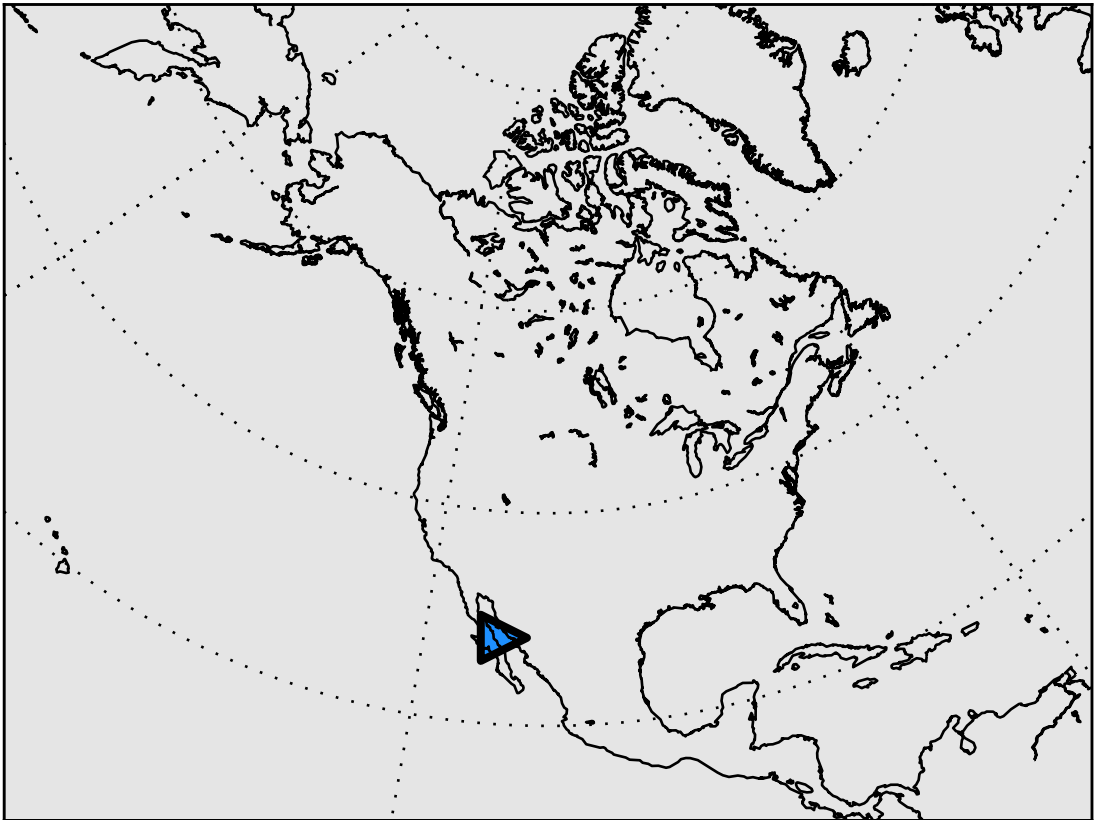

|                    |                                                       |
|--------------------|-------------------------------------------------------|
| Dataset name:      | DSDP480.Barron.2004                                   |
| Archive type:      | MarineSediment                                        |
| Proxy type:        | BSi                                                   |
| Variable name:     | BSi                                                   |
| Latitude ( ° N):   | 27.9                                                  |
| Longitude ( ° E):  | -111.65                                               |
| Elevation (m):     | -655.0                                                |
| Interp. variable:  | upwelling                                             |
| Interp. detail:    | @surface                                              |
| Interp. season:    | winterOnly                                            |
| Interp. direction: | positive                                              |
| Pub. 1 title:      | High resolution paleoceanography of the Guaymas Ba... |
| Pub. 1 authors:    | Barron, John A;Bukry, David;Bischoff, James L         |
| Pub. 1 year:       | 2004                                                  |
| Pub. 1 DOI:        | 10.1016/S0377-8398(03)00071-9                         |
| Original data URL: | www.ncdc.noaa.gov/paleo/study/5855                    |

Proxy data and metadata  
MarineSediment | BSi | MV99-GC31.Barron.2012 | LPD4d80bd37

Proxy time series: BSi

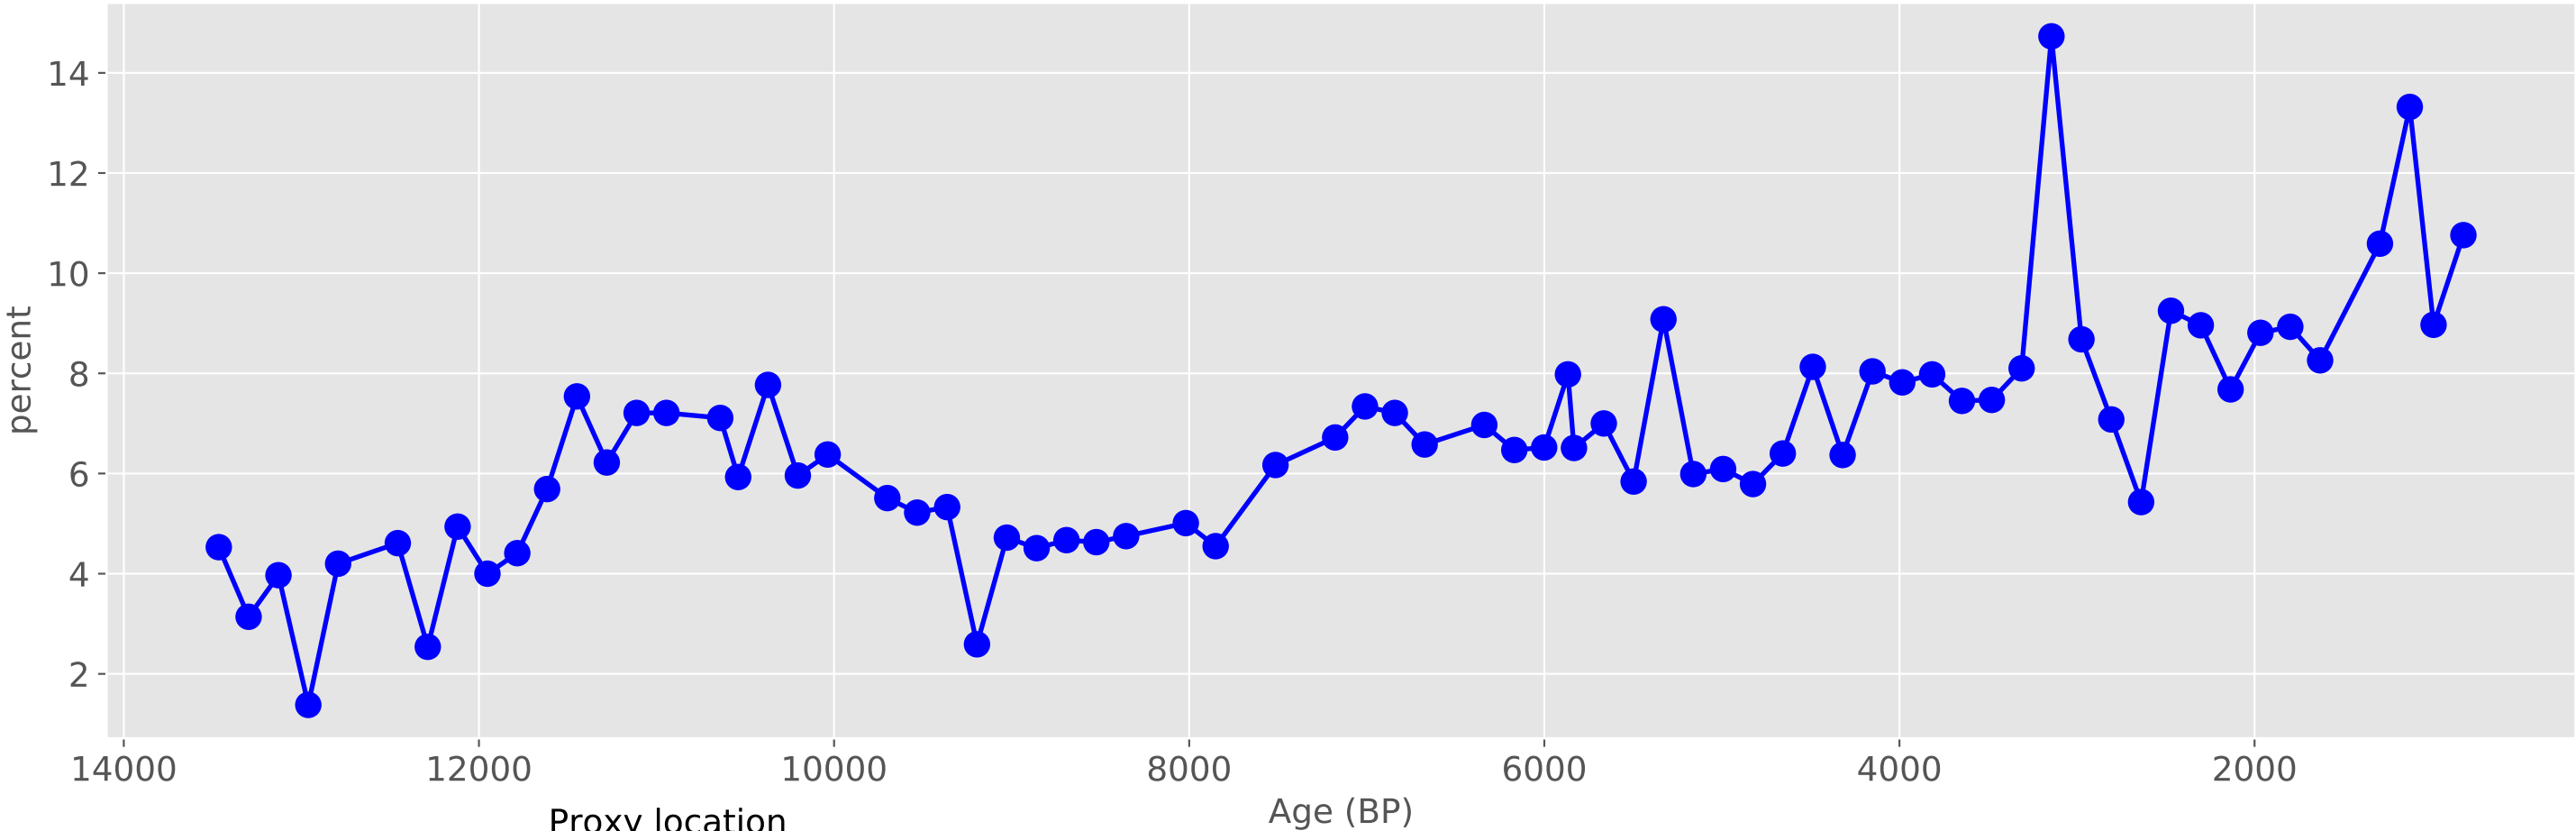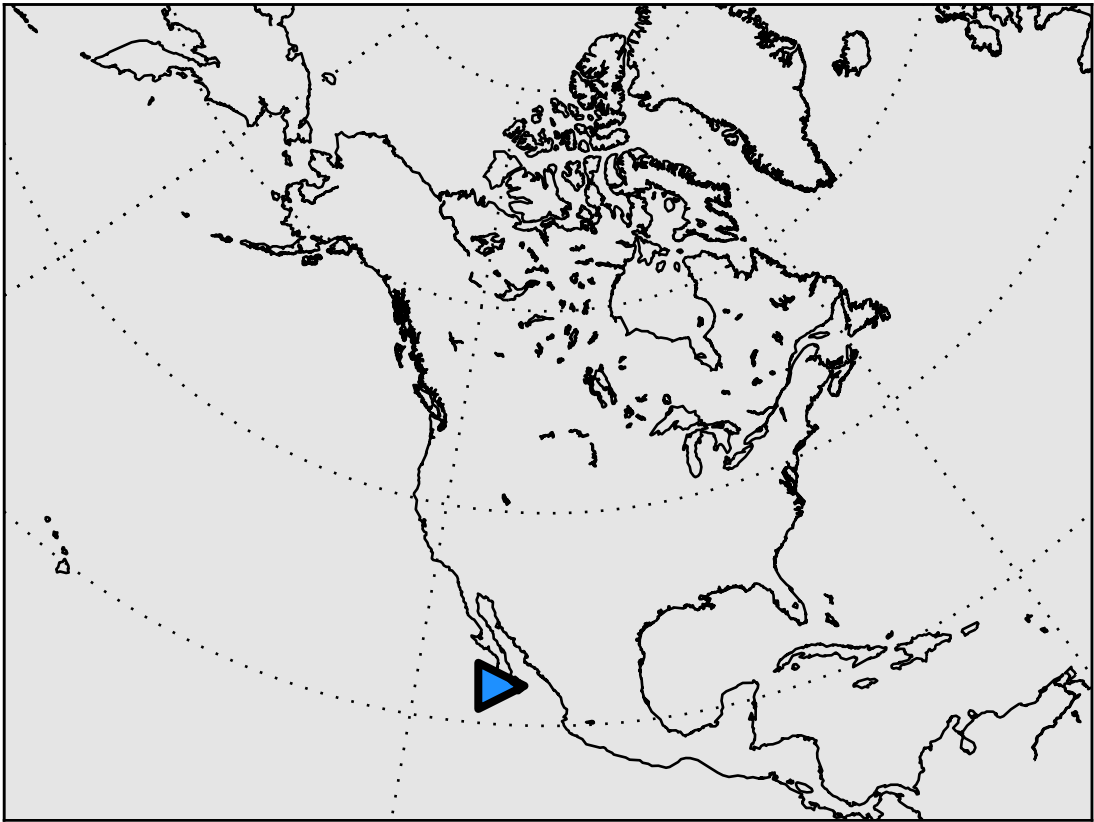

|                    |                                                       |
|--------------------|-------------------------------------------------------|
| Dataset name:      | MV99-GC31.Barron.2012                                 |
| Archive type:      | MarineSediment                                        |
| Proxy type:        | BSi                                                   |
| Variable name:     | BSi                                                   |
| Latitude ( ° N):   | 23.4672                                               |
| Longitude ( ° E):  | -111.5985                                             |
| Elevation (m):     | -705.0                                                |
| Interp. variable:  | upwelling                                             |
| Interp. detail:    | upwelling@surface                                     |
| Interp. season:    | annual                                                |
| Interp. direction: | negative                                              |
| Pub. 1 title:      | Response of the North American monsoon to regional... |
| Pub. 1 authors:    | Barron, John A.;Metcalf, Sarah E.;Addison, Jason ...  |
| Pub. 1 year:       | 2012                                                  |
| Pub. 1 DOI:        | 10.1029/2011PA002235                                  |
| Original data URL: | 10.1594/PANGAEA.824830?format=html#download           |

Proxy data and metadata  
MarineSediment | CaCO3 | ODP1019.Barron.2003 | LPDc8d8f169

Proxy time series: upwelling

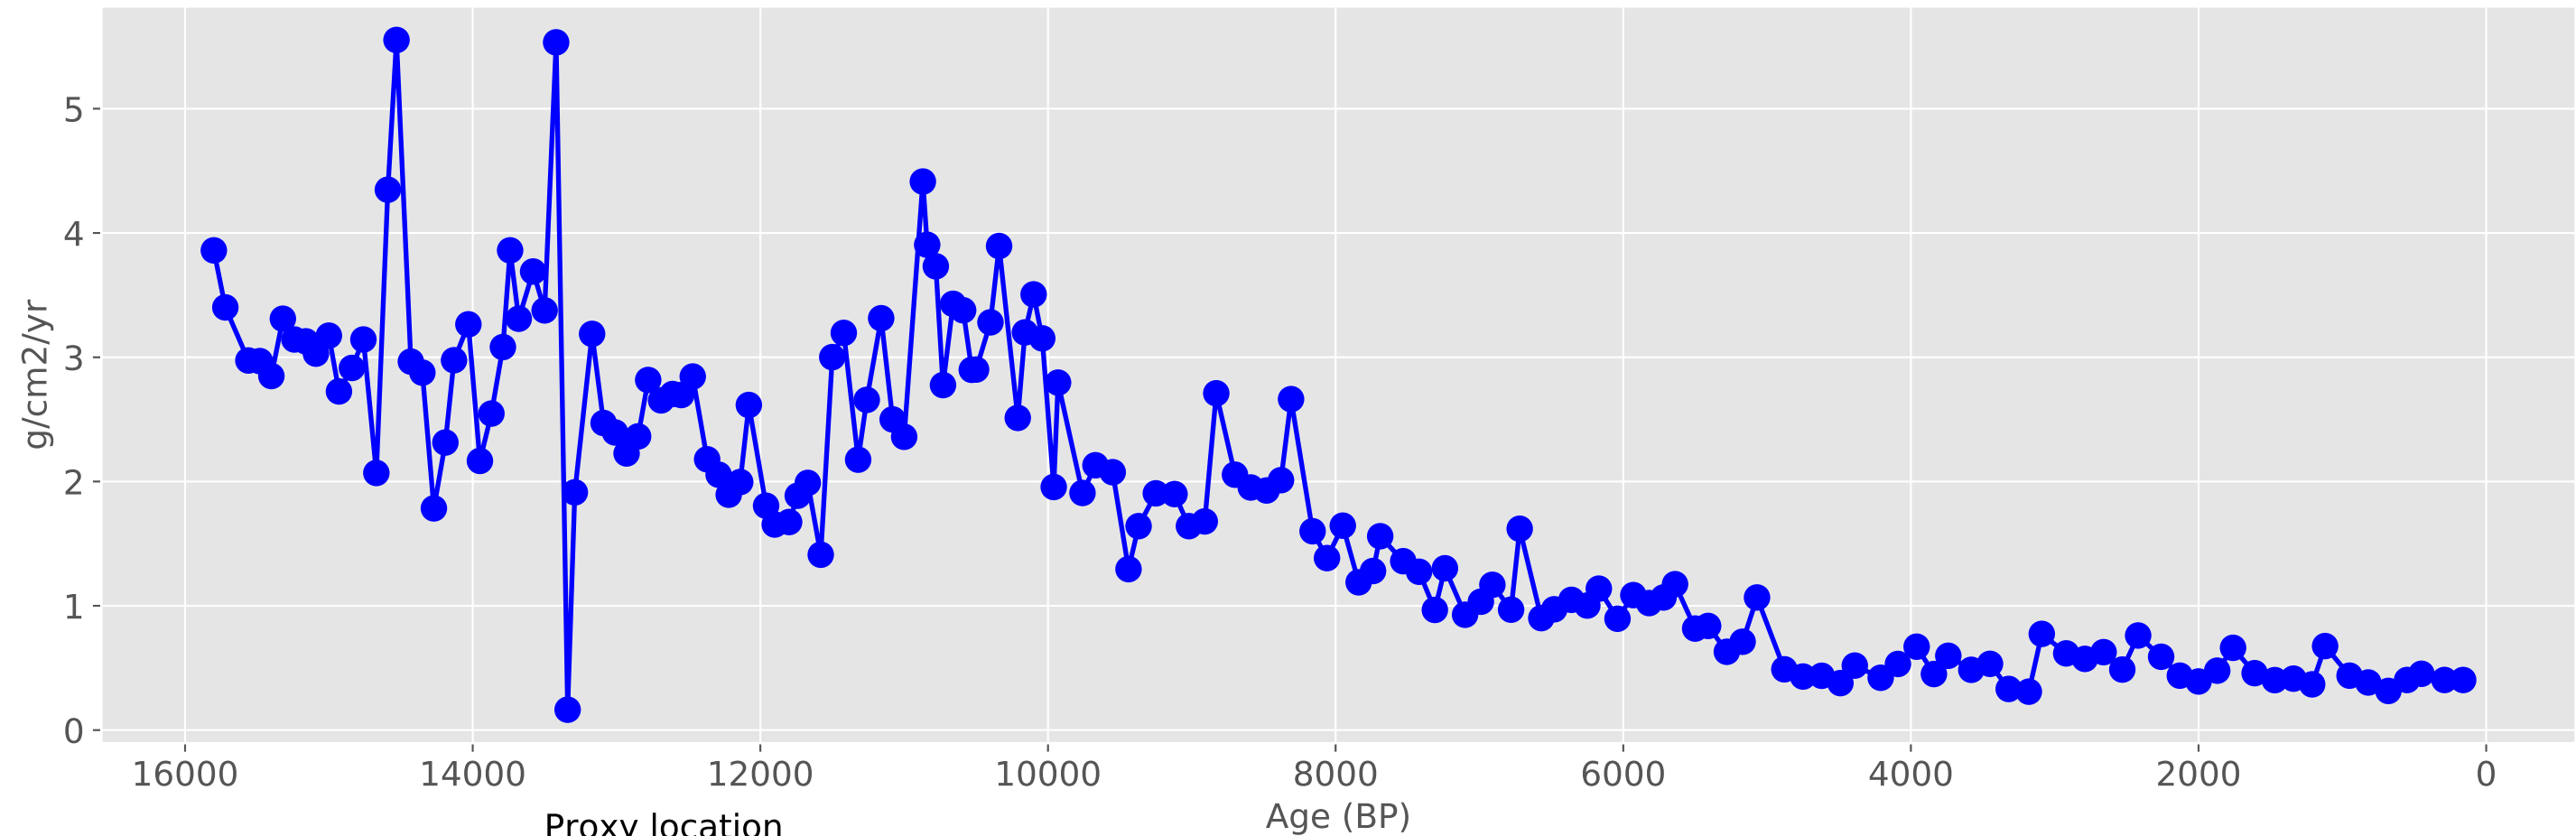

Proxy location  
(41.68 ° N, 124.93 ° W)

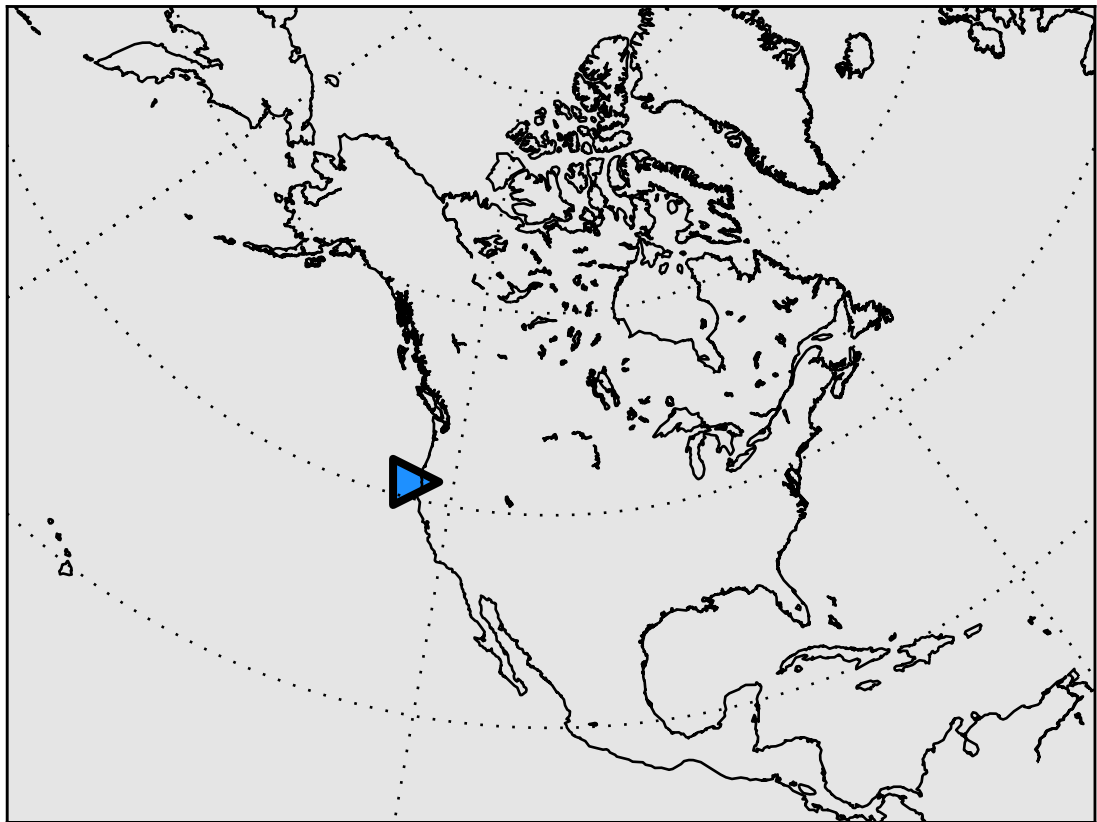

|                    |                                                                                            |
|--------------------|--------------------------------------------------------------------------------------------|
| Dataset name:      | ODP1019.Barron.2003                                                                        |
| Archive type:      | MarineSediment                                                                             |
| Proxy type:        | CaCO3                                                                                      |
| Variable name:     | upwelling                                                                                  |
| Latitude ( ° N):   | 41.682                                                                                     |
| Longitude ( ° E):  | -124.93                                                                                    |
| Elevation (m):     | -980.0                                                                                     |
| Interp. variable:  | upwelling                                                                                  |
| Interp. detail:    | upwelling@surface                                                                          |
| Interp. season:    | annual                                                                                     |
| Interp. direction: | negative                                                                                   |
| Pub. 1 title:      | High-resolution climatic evolution of coastal nort...                                      |
| Pub. 1 authors:    | Barron, John A.;Heusser, Linda;Herbert, Timothy;Ly...                                      |
| Pub. 1 year:       | 2003                                                                                       |
| Pub. 1 DOI:        | 10.1029/2002PA000768                                                                       |
| Original data URL: | <a href="http://www.ncdc.noaa.gov/paleo/study/5867">www.ncdc.noaa.gov/paleo/study/5867</a> |



Proxy data and metadata  
MarineSediment | CaCO3 | DSDP480.Barron.2004 | LPDb7754b0a

Proxy time series: CaCO3

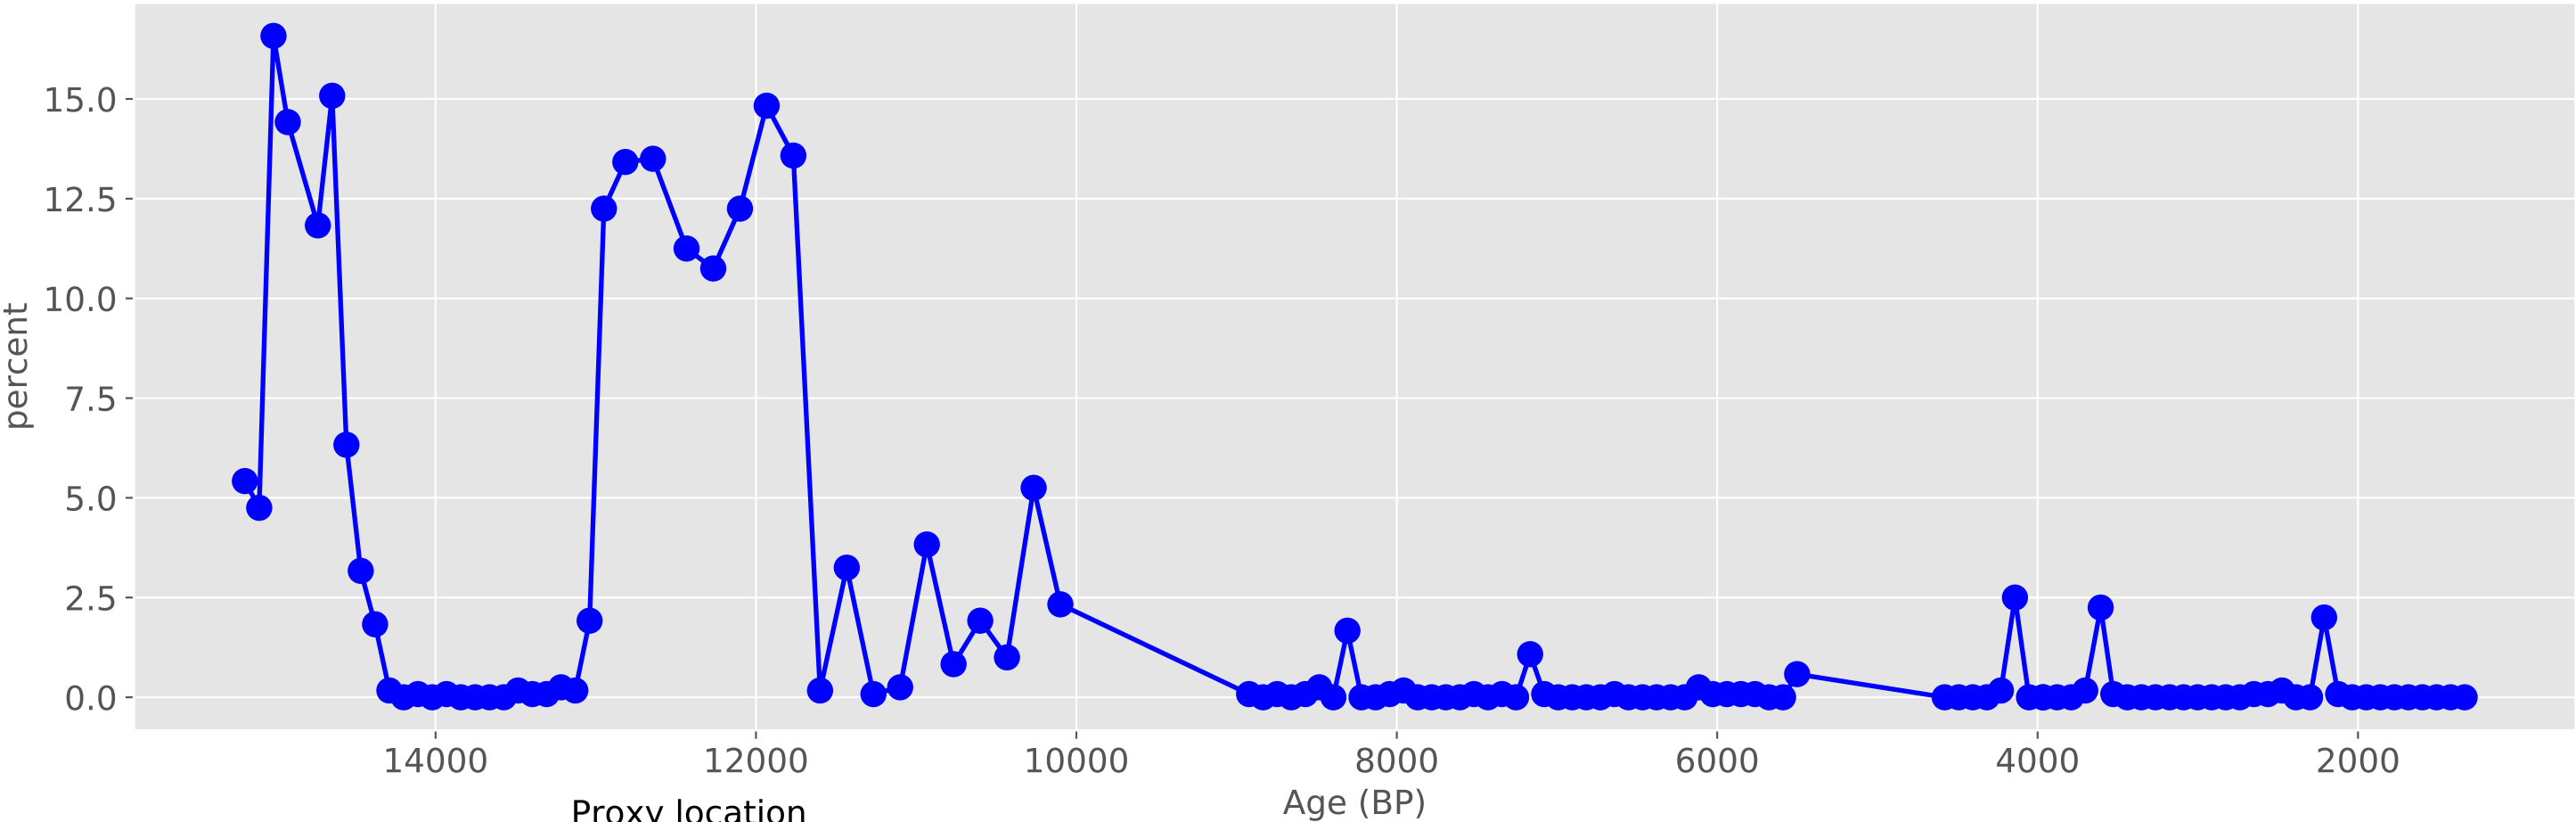

|                    |                                                       |
|--------------------|-------------------------------------------------------|
| Dataset name:      | DSDP480.Barron.2004                                   |
| Archive type:      | MarineSediment                                        |
| Proxy type:        | CaCO3                                                 |
| Variable name:     | CaCO3                                                 |
| Latitude ( ° N):   | 27.9                                                  |
| Longitude ( ° E):  | -111.65                                               |
| Elevation (m):     | -655.0                                                |
| Interp. variable:  | upwelling                                             |
| Interp. detail:    | @surface                                              |
| Interp. season:    | winterOnly                                            |
| Interp. direction: | negative                                              |
| Pub. 1 title:      | High resolution paleoceanography of the Guaymas Ba... |
| Pub. 1 authors:    | Barron, John A;Bukry, David;Bischoff, James L         |
| Pub. 1 year:       | 2004                                                  |
| Pub. 1 DOI:        | 10.1016/S0377-8398(03)00071-9                         |
| Original data URL: | www.ncdc.noaa.gov/paleo/study/5855                    |

Proxy data and metadata

MarineSediment | coccolith | AlfonsoBasin.StainesUrias.2015 | WEB27f8103d

Proxy time series: GoE

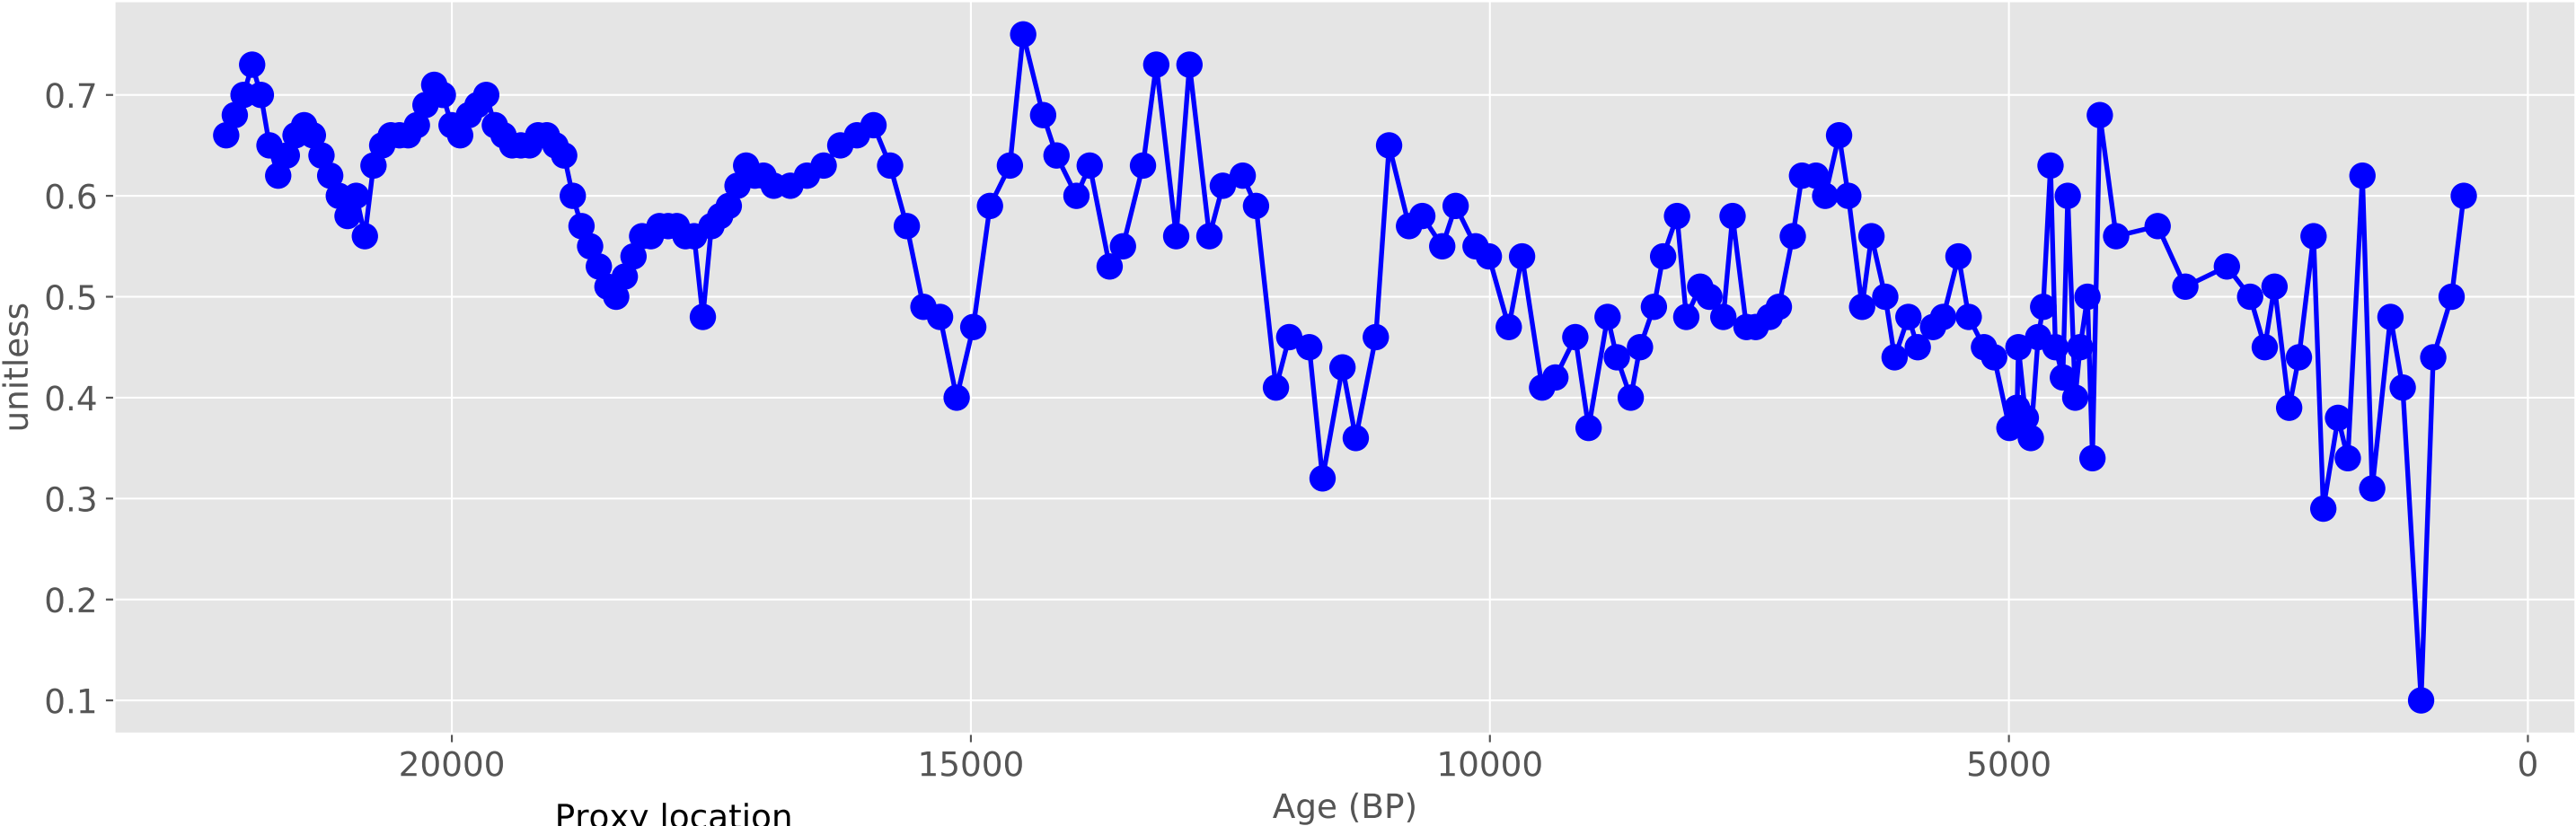

Proxy location  
(24.65 ° N, 110.60 ° W)

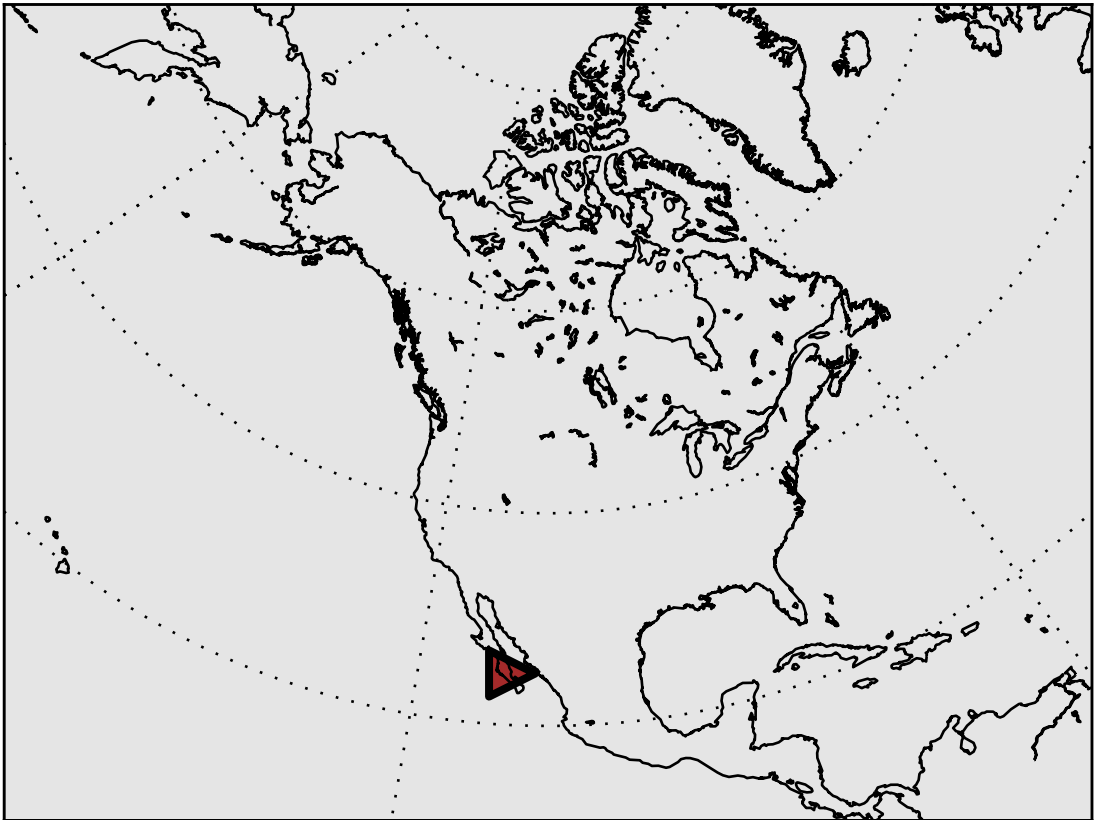

|                    |                                                       |
|--------------------|-------------------------------------------------------|
| Dataset name:      | AlfonsoBasin.StainesUrias.2015                        |
| Archive type:      | MarineSediment                                        |
| Proxy type:        | coccolith                                             |
| Variable name:     | GoE                                                   |
| Latitude ( ° N):   | 24.6472                                               |
| Longitude ( ° E):  | -110.6                                                |
| Elevation (m):     | -410.0                                                |
| Interp. variable:  | MODE                                                  |
| Interp. detail:    | elNino                                                |
| Interp. season:    | annual                                                |
| Interp. direction: | negative                                              |
| Pub. 1 title:      | Reconstruction of past climate variability and ENS... |
| Pub. 1 authors:    | Staines-Uriás, Francisca;González-Yajimovich, Osca... |
| Pub. 1 year:       | 2015                                                  |
| Pub. 1 DOI:        | 10.1016/j.yqres.2015.03.007                           |
| Original data URL: | wNA                                                   |

Proxy data and metadata

MarineSediment | coccolith | AlfonsoBasin.StainesUrias.2015 | WEBb2f6d867

Proxy time series: GoF

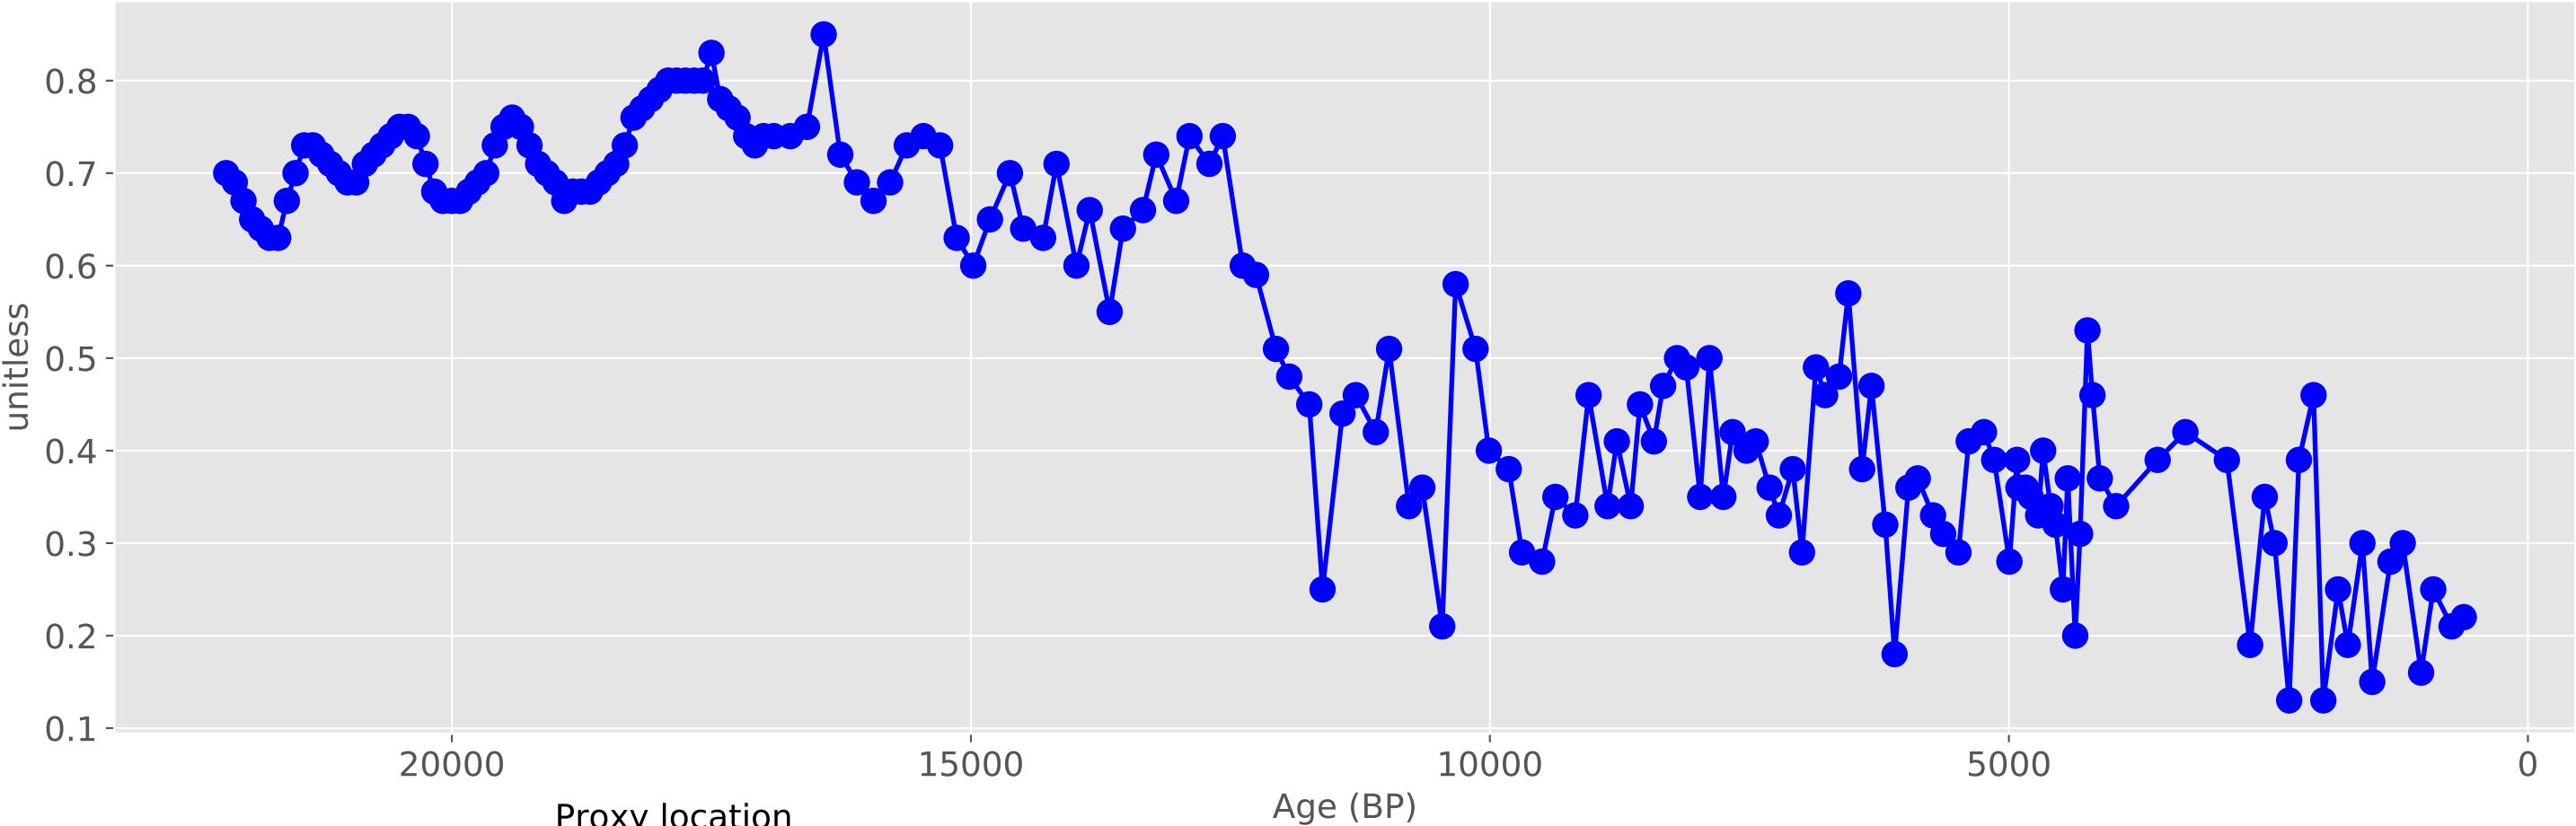

Proxy location  
(24.65 ° N, 110.60 ° W)



|                    |                                                       |
|--------------------|-------------------------------------------------------|
| Dataset name:      | AlfonsoBasin.StainesUrias.2015                        |
| Archive type:      | MarineSediment                                        |
| Proxy type:        | coccolith                                             |
| Variable name:     | GoF                                                   |
| Latitude ( ° N):   | 24.6472                                               |
| Longitude ( ° E):  | -110.6                                                |
| Elevation (m):     | -410.0                                                |
| Interp. variable:  | upwelling                                             |
| Interp. detail:    | @surface                                              |
| Interp. season:    | annual                                                |
| Interp. direction: | positive                                              |
| Pub. 1 title:      | Reconstruction of past climate variability and ENS... |
| Pub. 1 authors:    | Staines-Uriás, Francisca;González-Yajimovich, Osca... |
| Pub. 1 year:       | 2015                                                  |
| Pub. 1 DOI:        | 10.1016/j.yqres.2015.03.007                           |
| Original data URL: | wNAm                                                  |

Proxy data and metadata

MarineSediment | d18O | EW0408\_85JC.Praetorius.2015 | T2L\_EW0408\_85JC\_d18o\_bulloides\_SST\_from\_...

Proxy time series: temperature

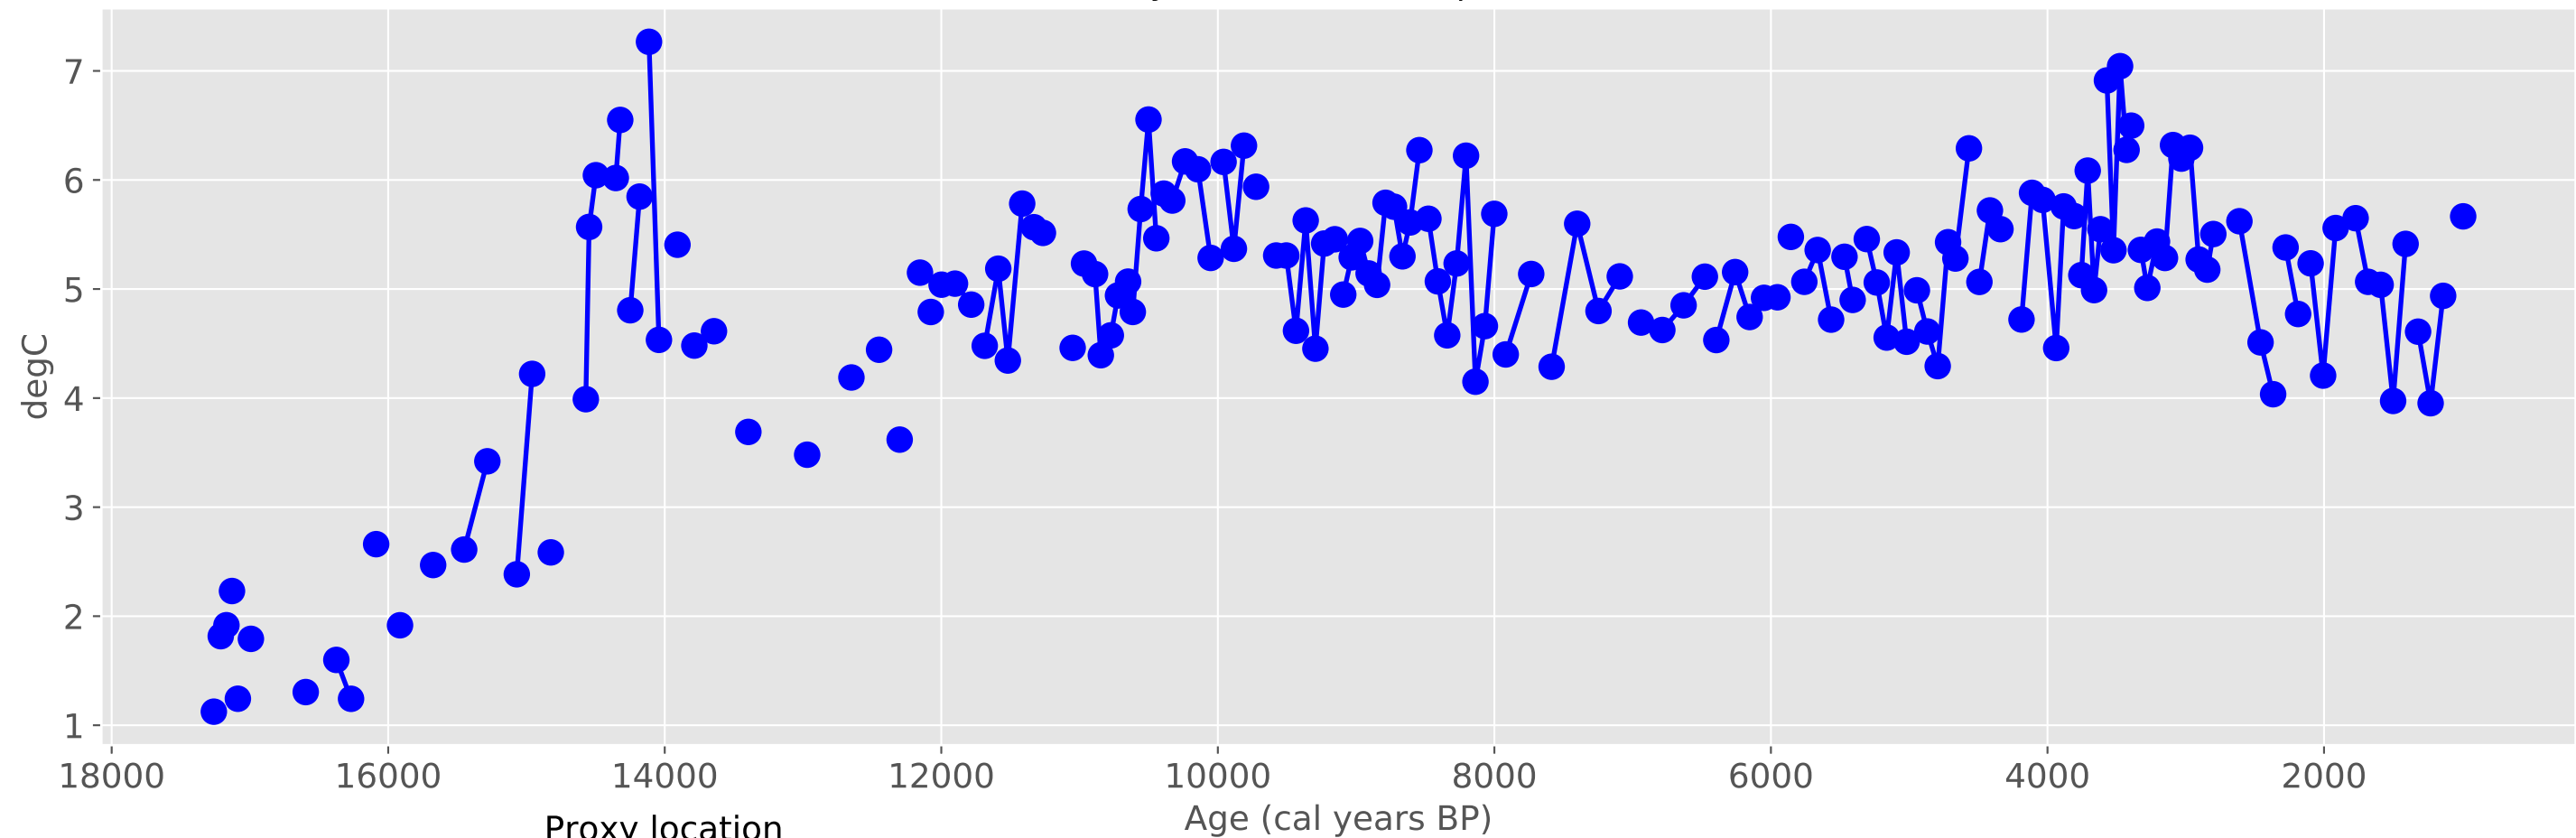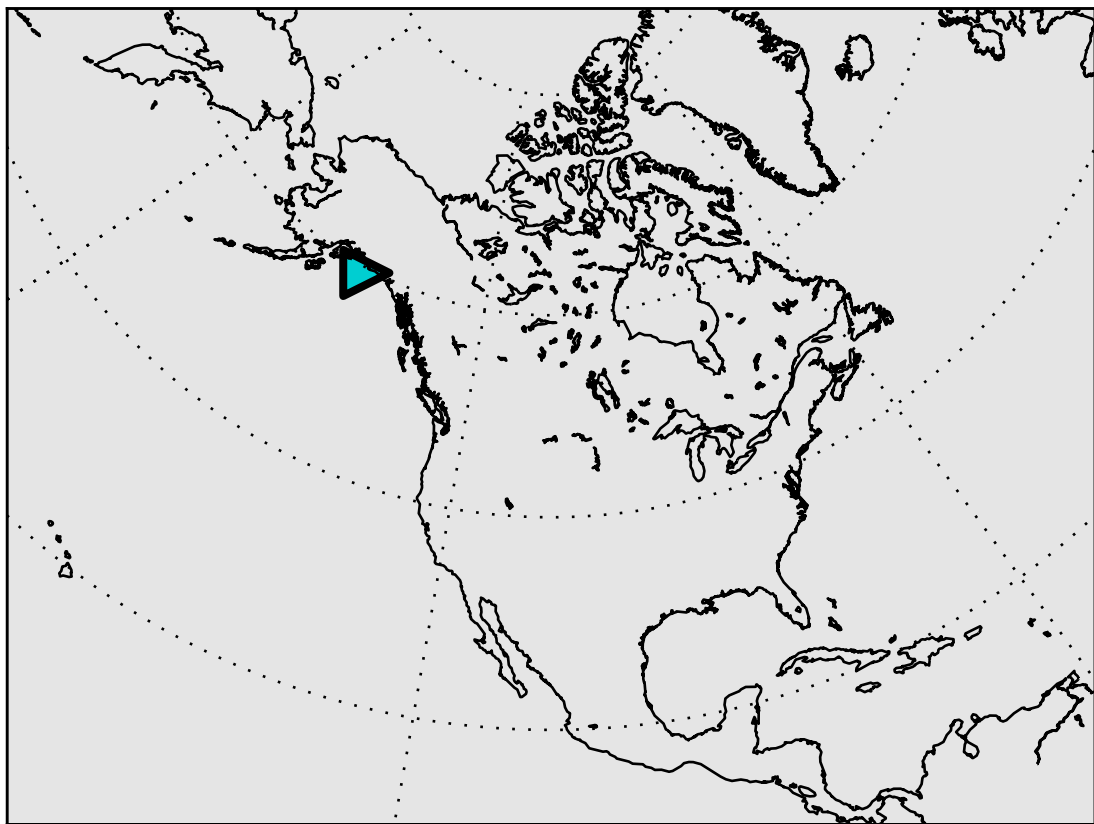

|                    |                                                       |
|--------------------|-------------------------------------------------------|
| Dataset name:      | EW0408_85JC.Praetorius.2015                           |
| Archive type:      | MarineSediment                                        |
| Proxy type:        | d18O                                                  |
| Variable name:     | temperature                                           |
| Latitude (° N):    | 59.5554                                               |
| Longitude (° E):   | -144.1535                                             |
| Elevation (m):     | -682.0                                                |
| Interp. variable:  | T                                                     |
| Interp. detail:    | sea@surface                                           |
| Interp. season:    | annual                                                |
| Interp. direction: | positive                                              |
| Pub. 1 title:      | North Pacific deglacial hypoxic events linked to a... |
| Pub. 1 authors:    | Praetorius, S. K.; Mix, A. C.; Walczak, M. H.; Wol... |
| Pub. 1 year:       | 2015                                                  |
| Pub. 1 DOI:        | 10.1038/nature15753                                   |
| Original data URL: | www.ncdc.noaa.gov/paleo/study/21950                   |

Proxy data and metadata

MarineSediment | d18O | EW0408\_85JC.Praetorius.2015 | T2L\_EW0408\_85JC\_d18o\_pachyderma\_SST\_from...

Proxy time series: temperature

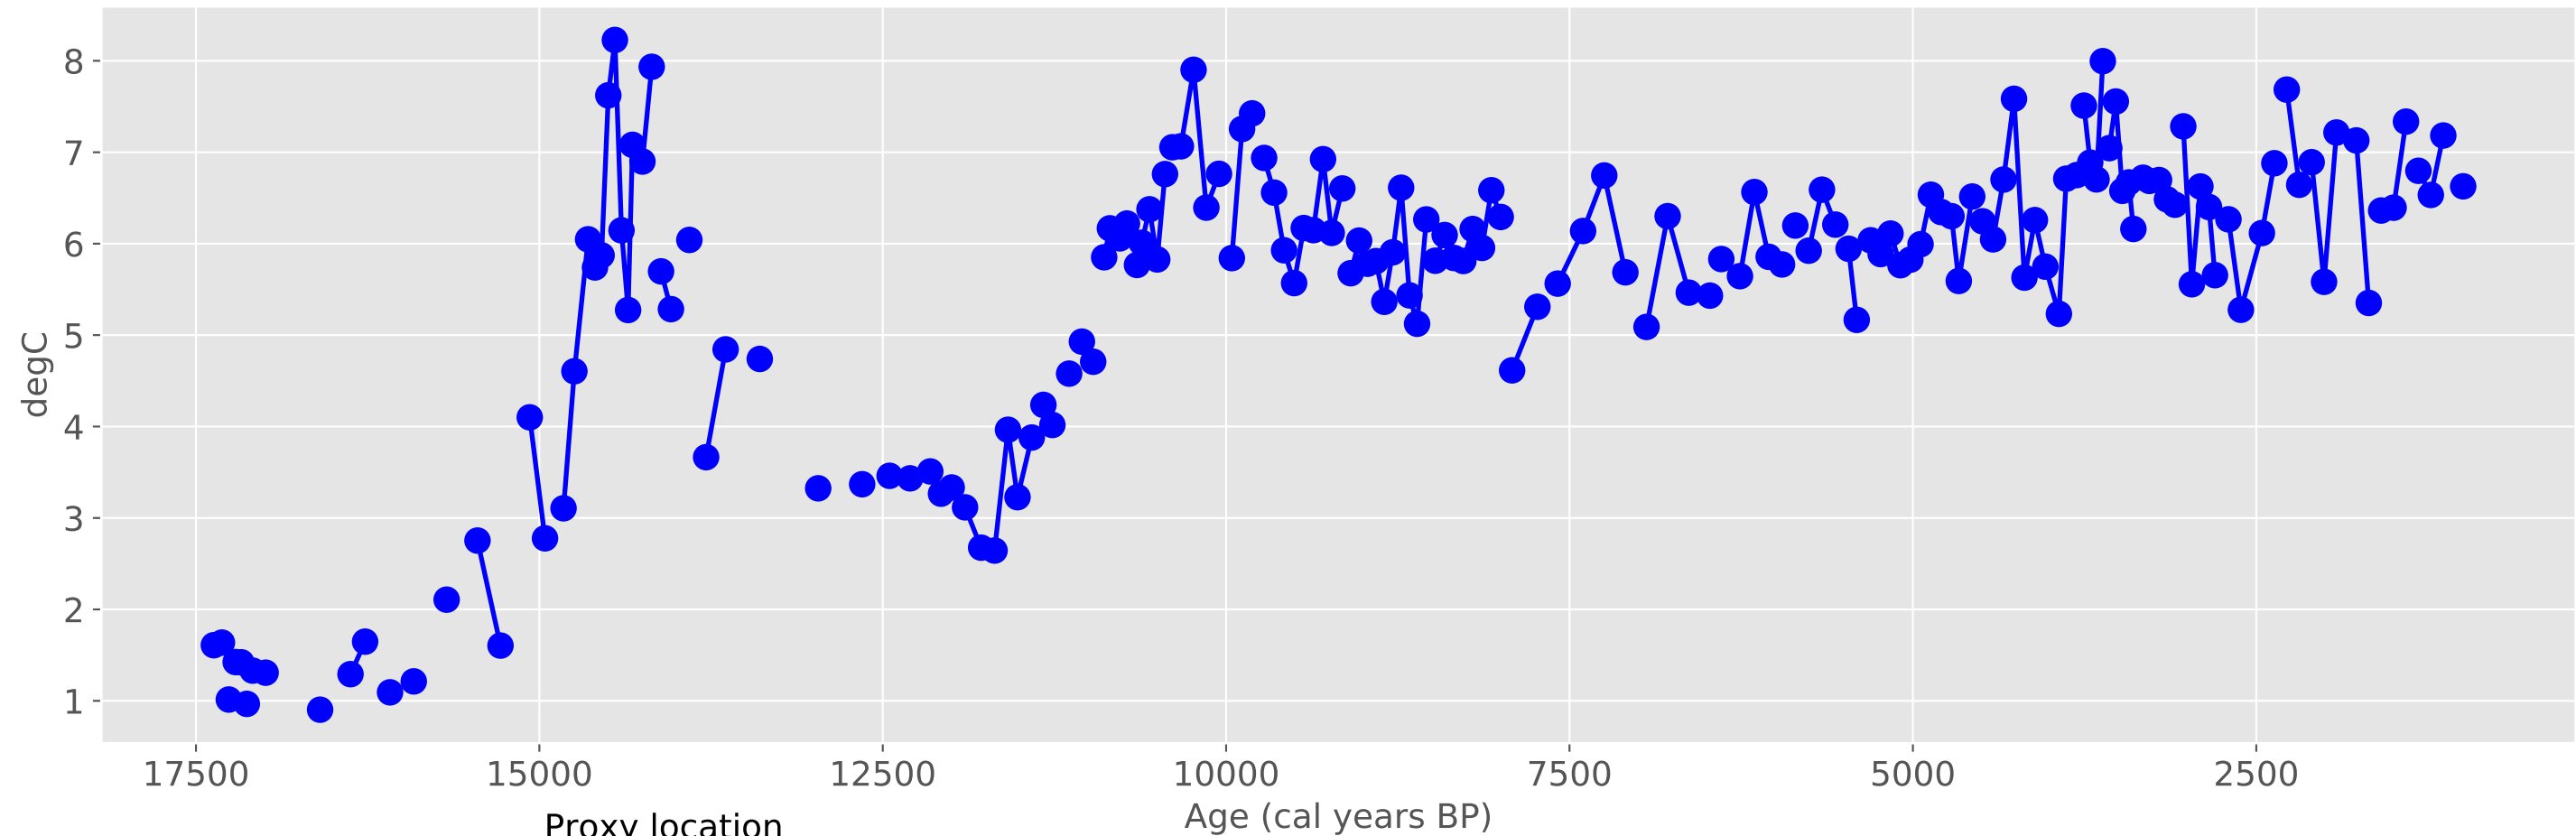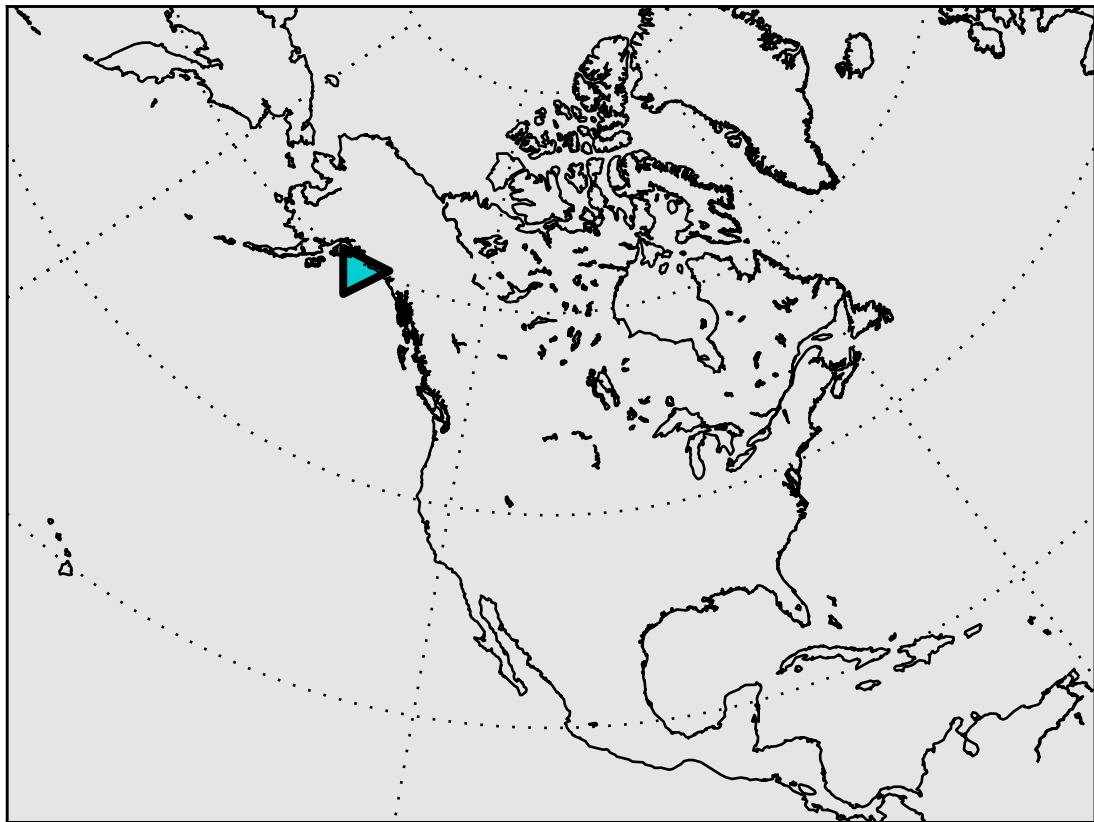

|                    |                                                                                              |
|--------------------|----------------------------------------------------------------------------------------------|
| Dataset name:      | EW0408_85JC.Praetorius.2015                                                                  |
| Archive type:      | MarineSediment                                                                               |
| Proxy type:        | d18O                                                                                         |
| Variable name:     | temperature                                                                                  |
| Latitude ( ° N):   | 59.5554                                                                                      |
| Longitude ( ° E):  | -144.1535                                                                                    |
| Elevation (m):     | -682.0                                                                                       |
| Interp. variable:  | T                                                                                            |
| Interp. detail:    | sea@surface                                                                                  |
| Interp. season:    | annual                                                                                       |
| Interp. direction: | positive                                                                                     |
| Pub. 1 title:      | North Pacific deglacial hypoxic events linked to a...                                        |
| Pub. 1 authors:    | Praetorius, S. K.; Mix, A. C.; Walczak, M. H.; Wol...                                        |
| Pub. 1 year:       | 2015                                                                                         |
| Pub. 1 DOI:        | 10.1038/nature15753                                                                          |
| Original data URL: | <a href="http://www.ncdc.noaa.gov/paleo/study/21950">www.ncdc.noaa.gov/paleo/study/21950</a> |

Proxy data and metadata

MarineSediment | d18O | EW0408\_66JC.Praetorius.2015 | T2L\_EW0408\_66JC\_d18o\_pachyderma\_SST\_from...

Proxy time series: temperature

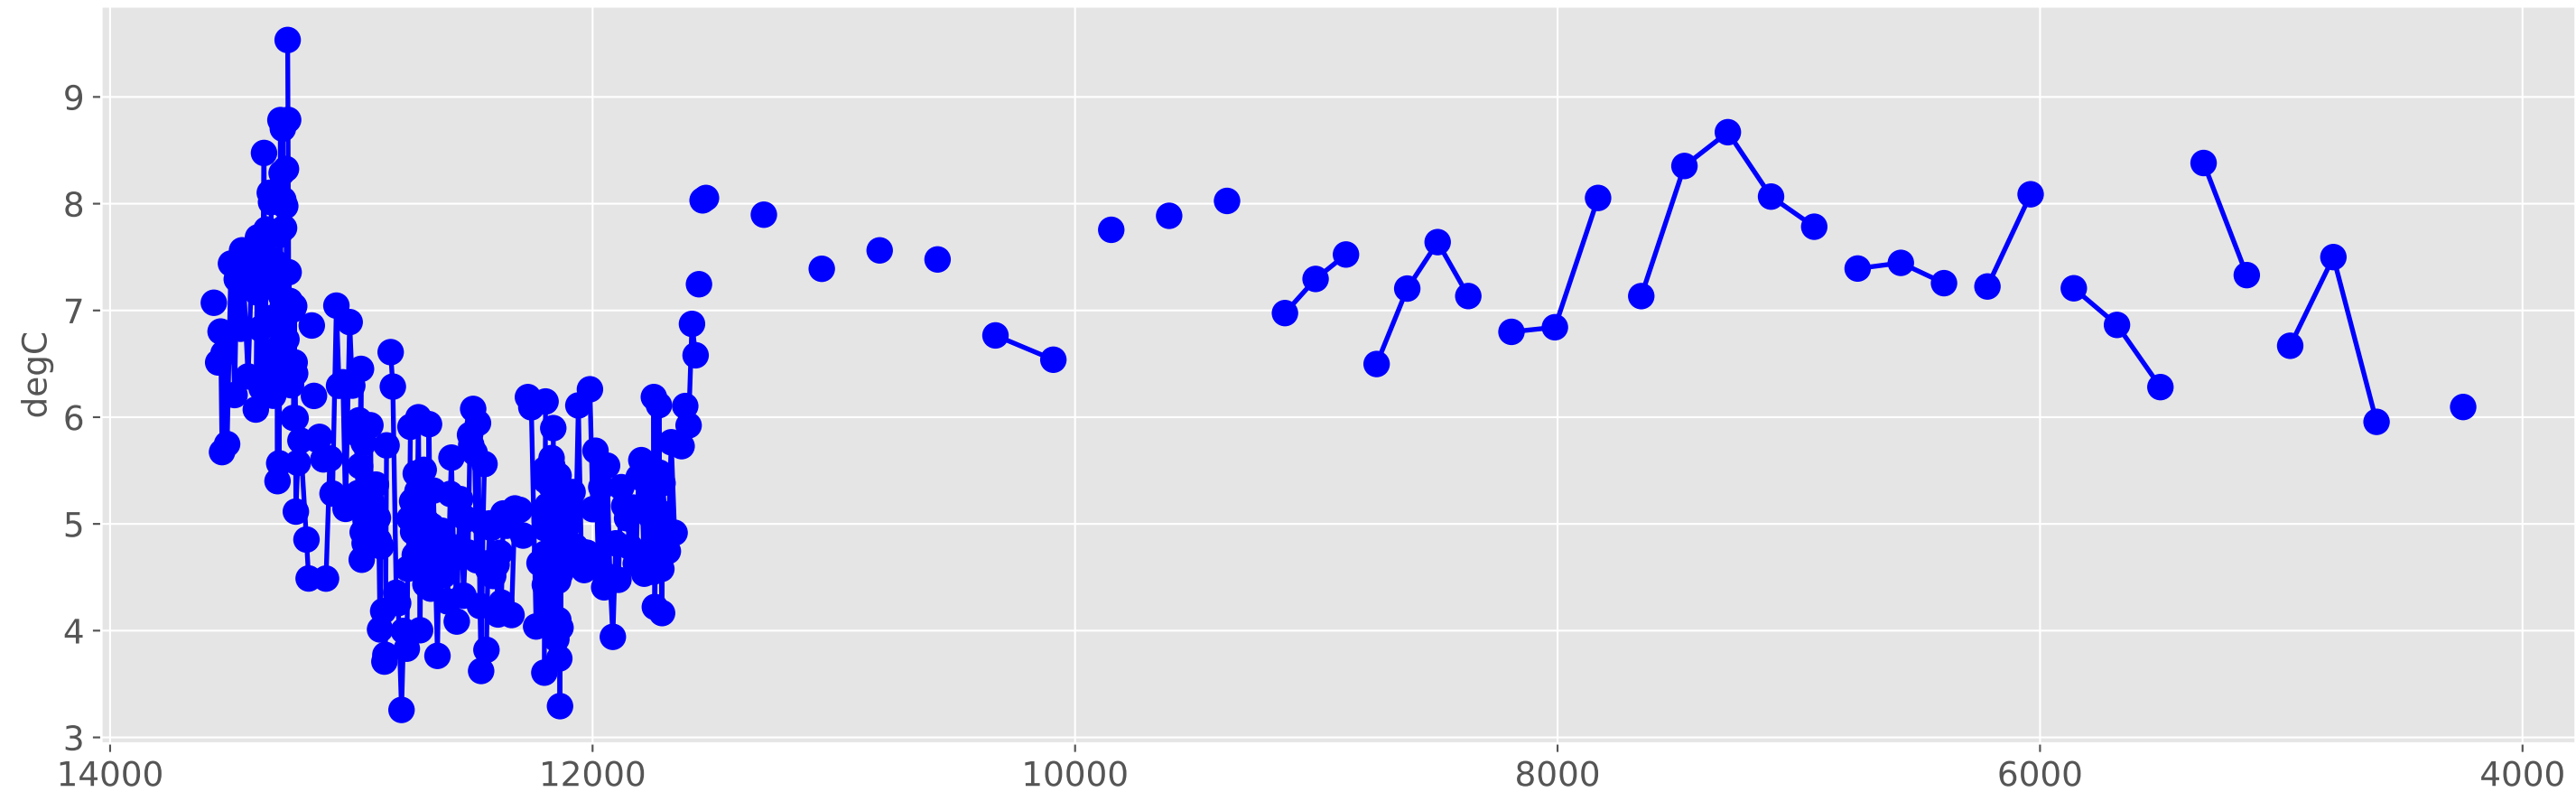

Proxy location  
(57.87 ° N, 137.10 ° W)

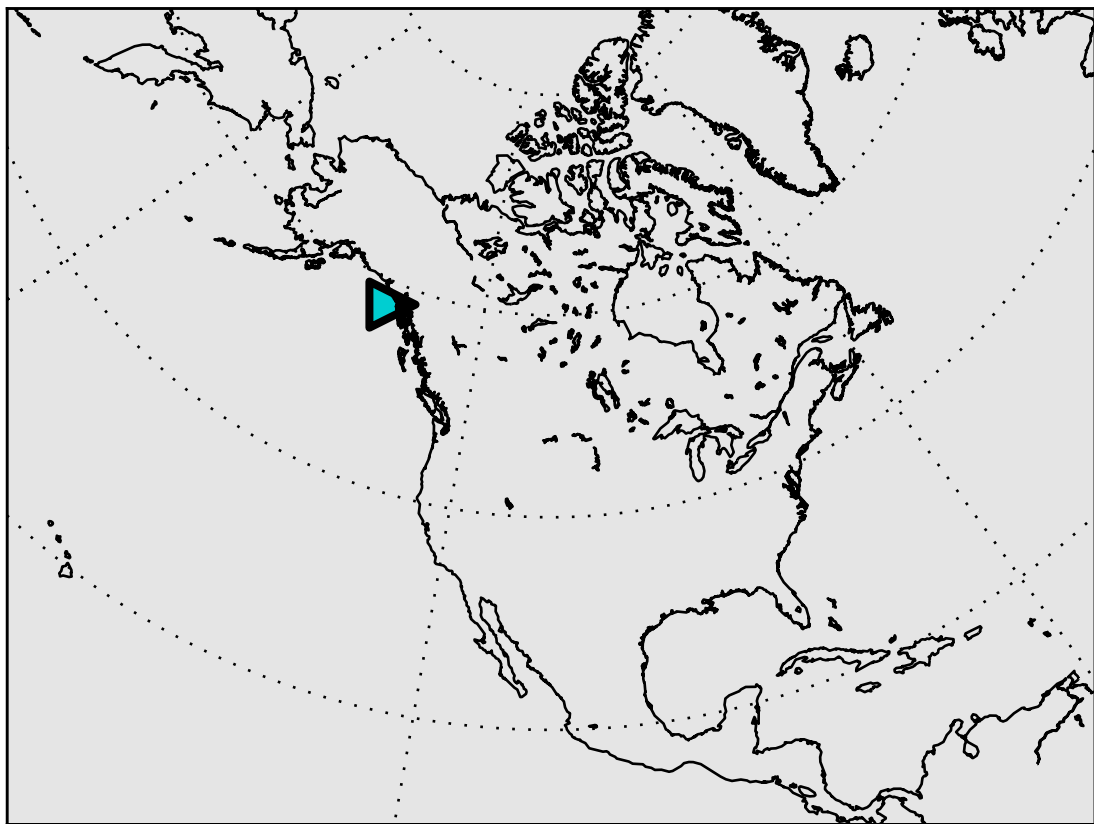

|                    |                                                       |
|--------------------|-------------------------------------------------------|
| Dataset name:      | EW0408_66JC.Praetorius.2015                           |
| Archive type:      | MarineSediment                                        |
| Proxy type:        | d18O                                                  |
| Variable name:     | temperature                                           |
| Latitude ( ° N):   | 57.8724                                               |
| Longitude ( ° E):  | -137.1045                                             |
| Elevation (m):     | -426.0                                                |
| Interp. variable:  | T                                                     |
| Interp. detail:    | sea@surface                                           |
| Interp. season:    | annual                                                |
| Interp. direction: | positive                                              |
| Pub. 1 title:      | North Pacific deglacial hypoxic events linked to a... |
| Pub. 1 authors:    | Praetorius, S. K.; Mix, A. C.; Walczak, M. H.; Wol... |
| Pub. 1 year:       | 2015                                                  |
| Pub. 1 DOI:        | 10.1038/nature15753                                   |
| Original data URL: | www.ncdc.noaa.gov/paleo/study/22400                   |



Proxy data and metadata

MarineSediment | d18O | MD02\_2503.Hill.2006 | T2L\_MD02\_2503\_d18o\_bulloides\_SST\_from\_d1...

Proxy time series: temperature

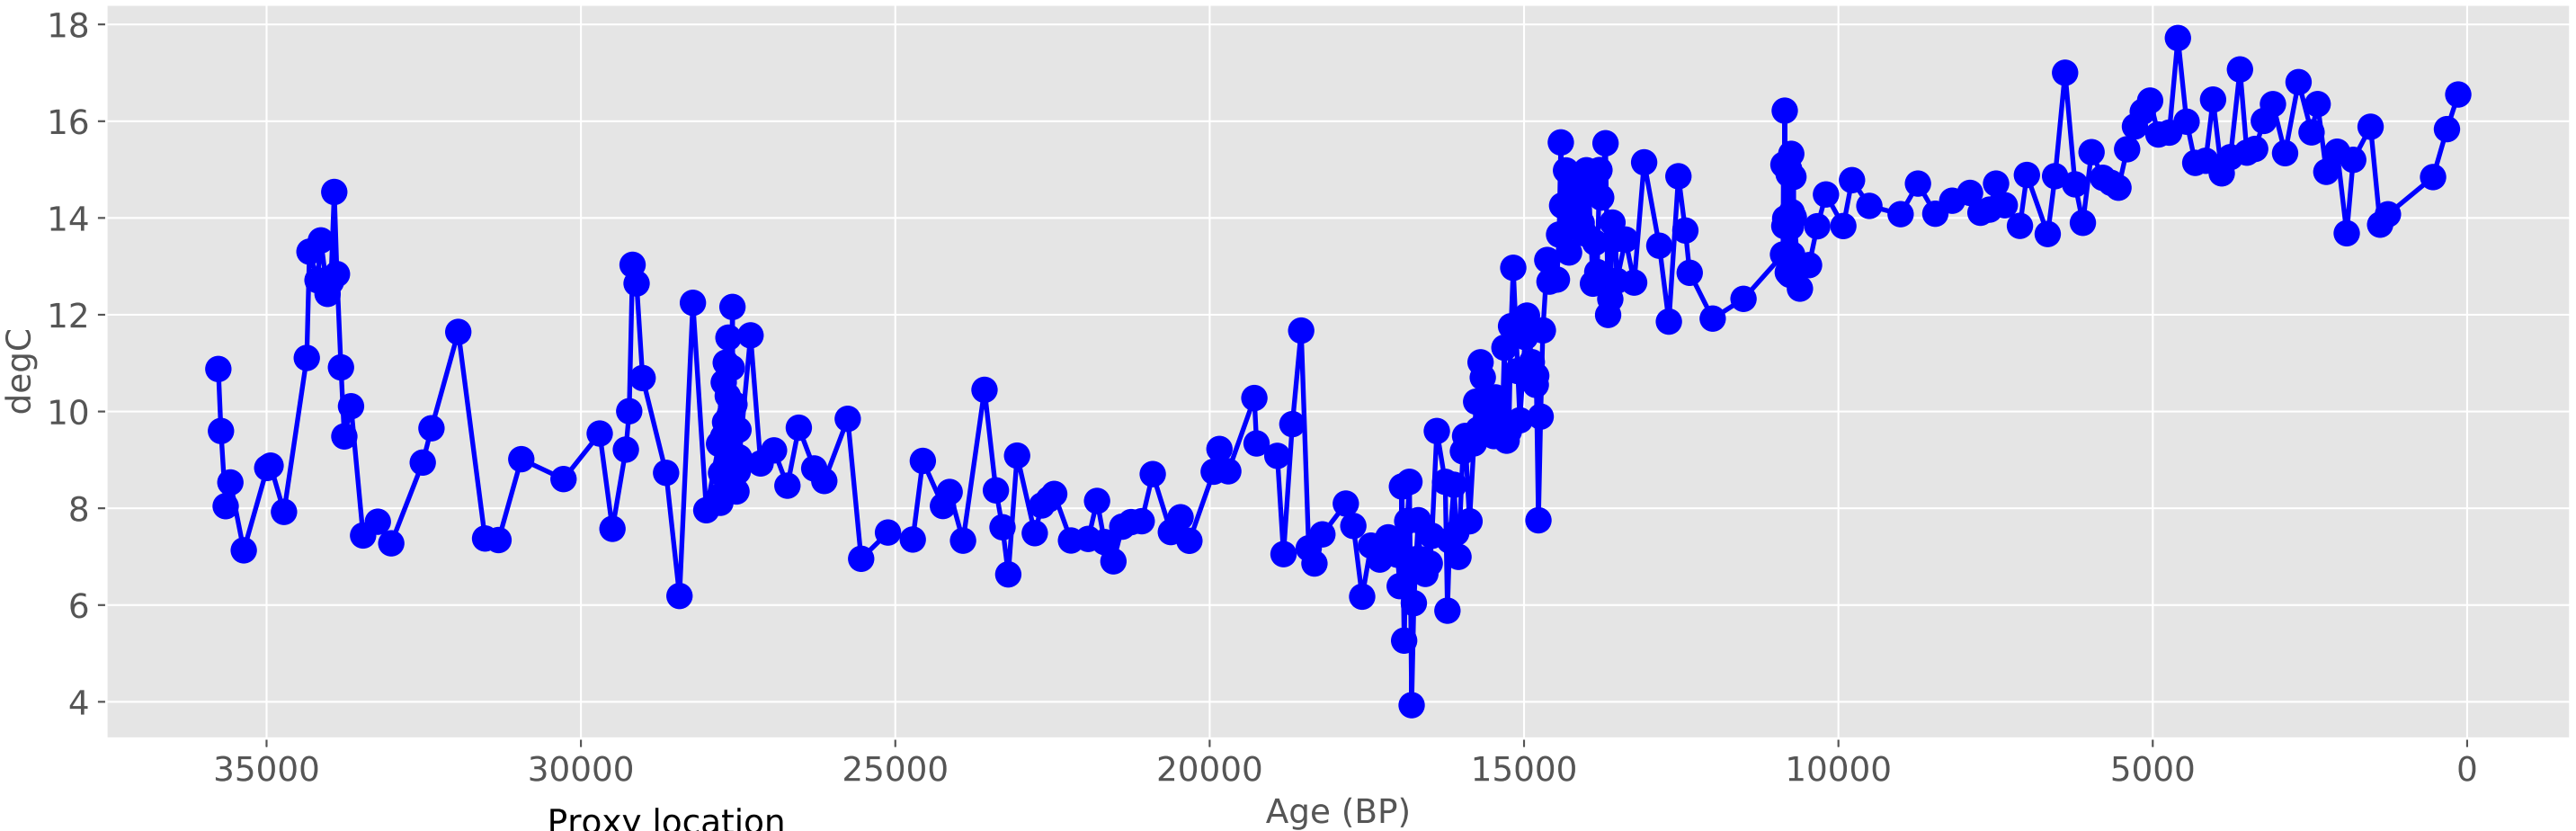

Proxy location  
(34.39 ° N, 120.04 ° W)

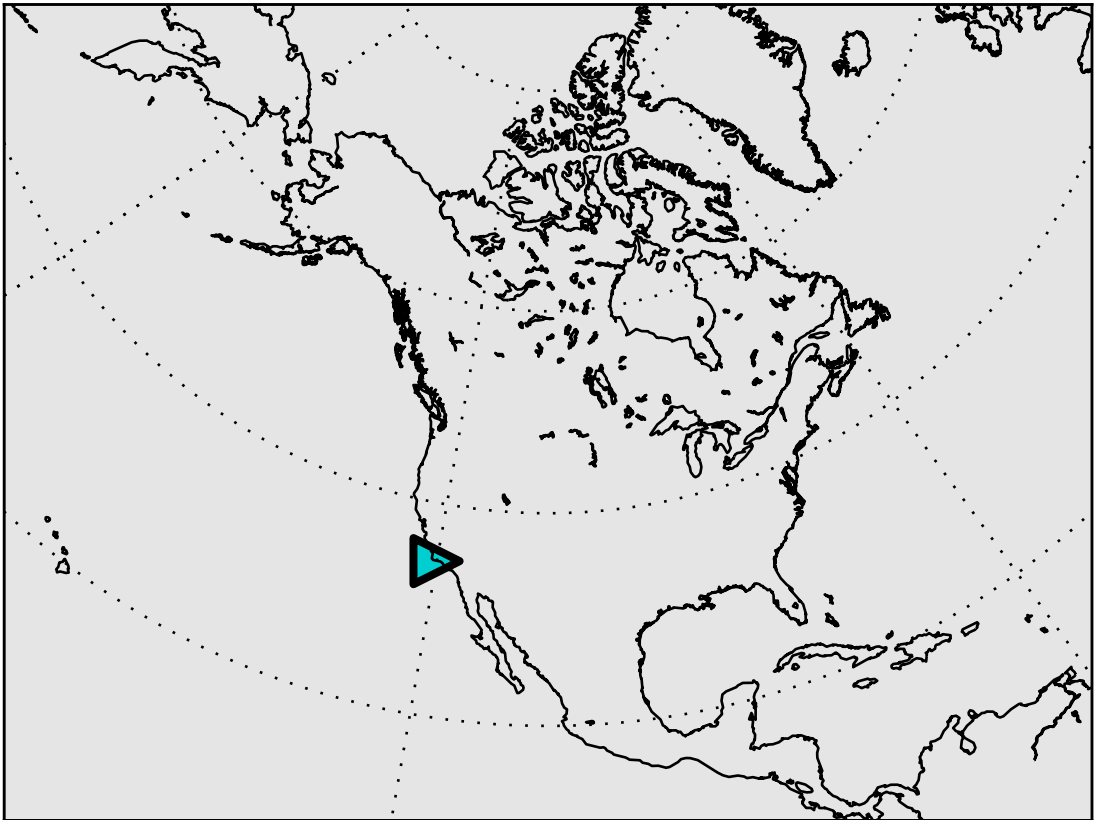

|                    |                                                       |
|--------------------|-------------------------------------------------------|
| Dataset name:      | MD02_2503.Hill.2006                                   |
| Archive type:      | MarineSediment                                        |
| Proxy type:        | d18O                                                  |
| Variable name:     | temperature                                           |
| Latitude ( ° N):   | 34.3862                                               |
| Longitude ( ° E):  | -120.0365                                             |
| Elevation (m):     | -569.0                                                |
| Interp. variable:  | T                                                     |
| Interp. detail:    | sea@surface                                           |
| Interp. season:    | annual                                                |
| Interp. direction: | positive                                              |
| Pub. 1 title:      | Pre-B lling warming in Santa Barbara Basin, Calif...  |
| Pub. 1 authors:    | Hill, T.M.; Kennett, J.P.; Pak, D.K.; Behl, R.J.; ... |
| Pub. 1 year:       | 2006                                                  |
| Pub. 1 DOI:        | 10.1016/j.quascirev.2006.03.012                       |
| Original data URL: | www.ncdc.noaa.gov/paleo/study/5582                    |

Proxy data and metadata  
MarineSediment | d18O | 893A.Kennet.2007 | LPD05340dbbbdp\_SST\_from\_d18O

Proxy time series: temperature

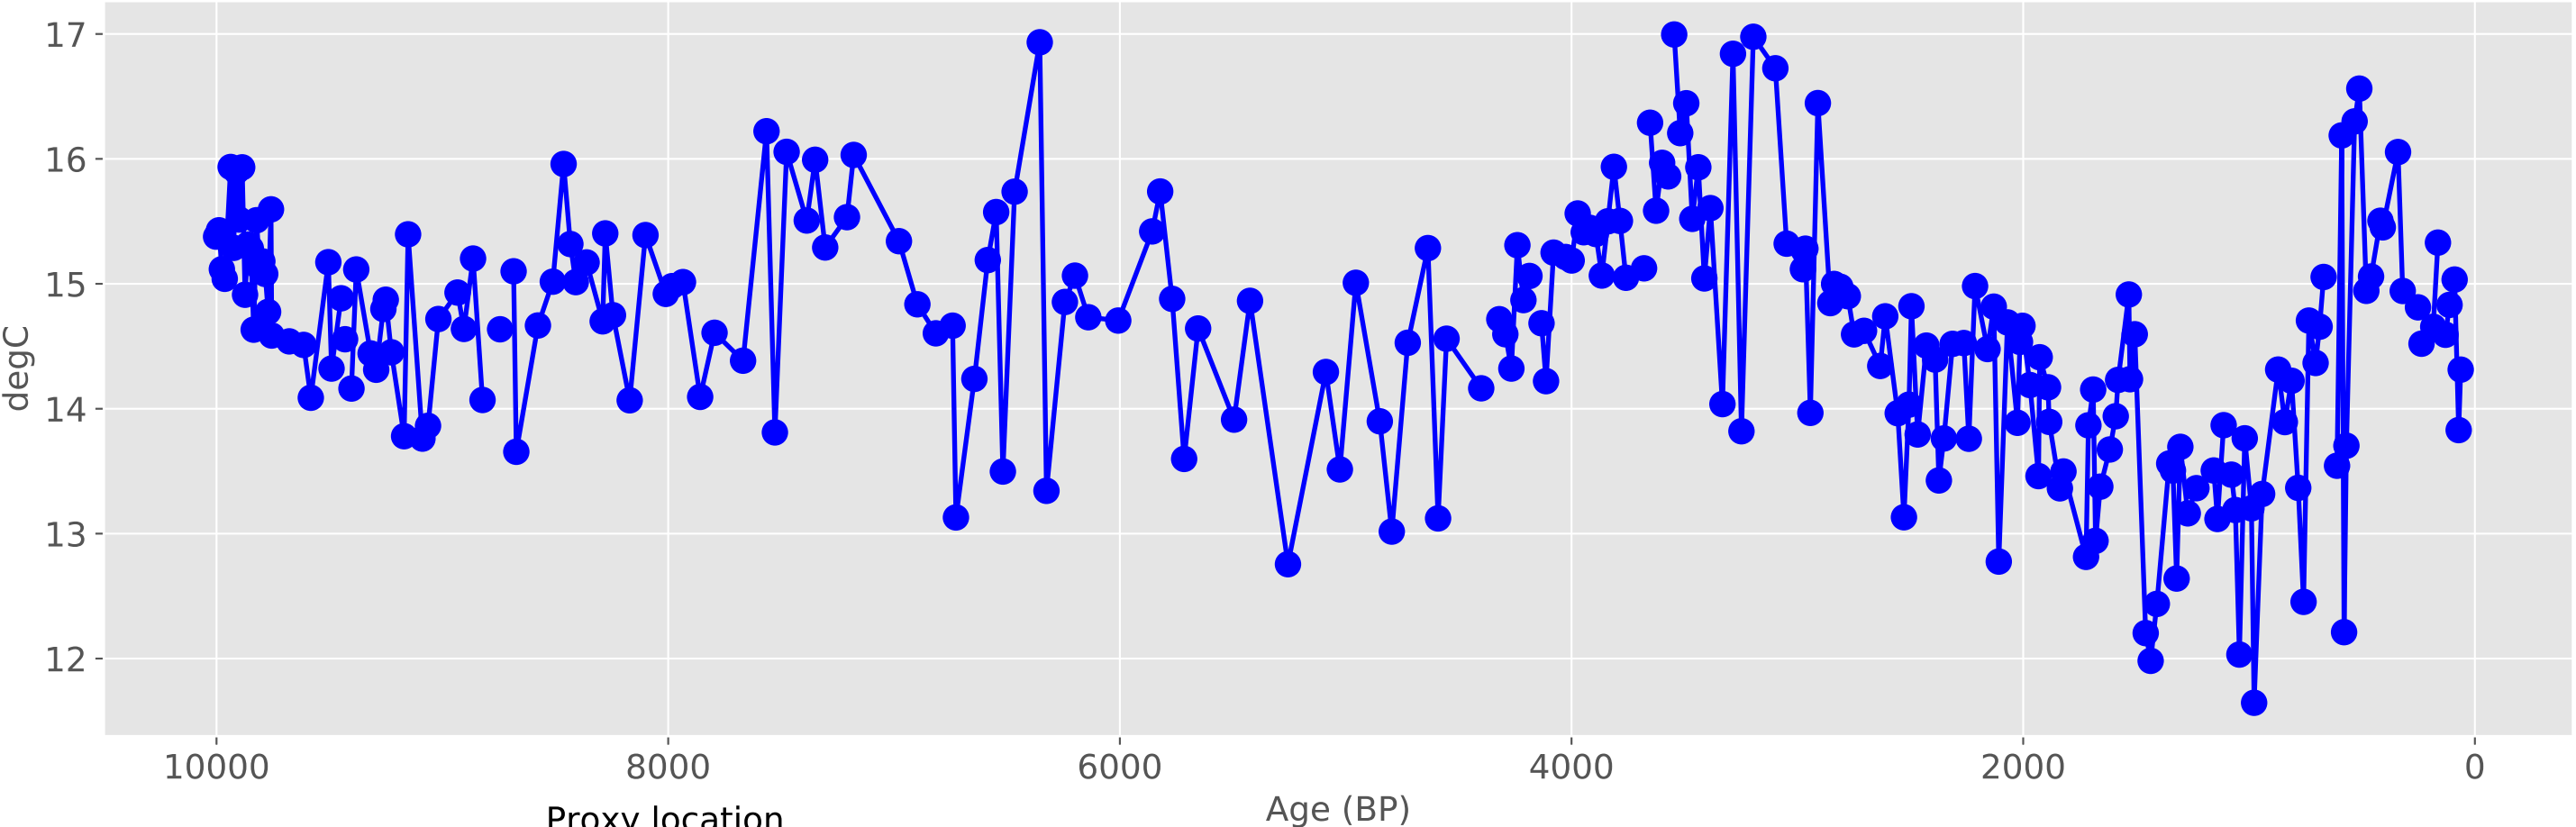

Proxy location  
(34.29 ° N, 120.04 ° W)

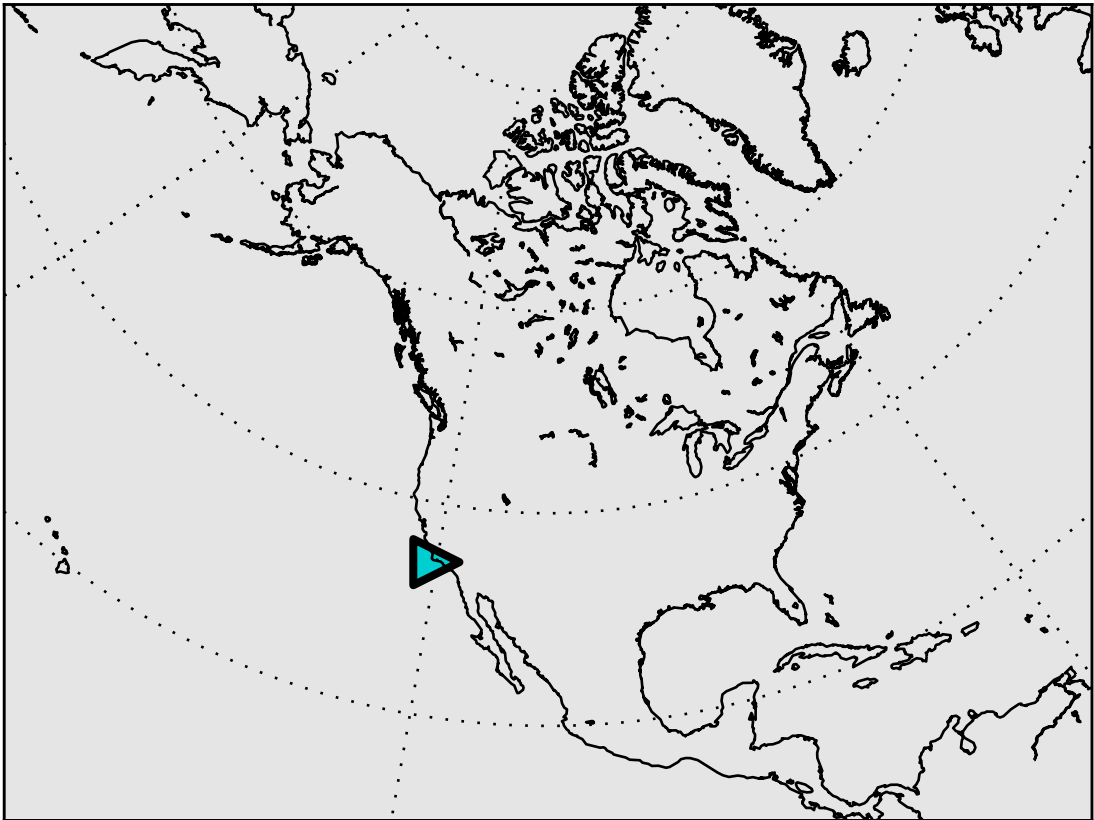

|                    |                                                                                              |
|--------------------|----------------------------------------------------------------------------------------------|
| Dataset name:      | 893A.Kennet.2007                                                                             |
| Archive type:      | MarineSediment                                                                               |
| Proxy type:        | d18O                                                                                         |
| Variable name:     | temperature                                                                                  |
| Latitude ( ° N):   | 34.2875                                                                                      |
| Longitude ( ° E):  | -120.036                                                                                     |
| Elevation (m):     | -588.0                                                                                       |
| Interp. variable:  | T                                                                                            |
| Interp. detail:    | sea@surface                                                                                  |
| Interp. season:    | annual                                                                                       |
| Interp. direction: | positive                                                                                     |
| Pub. 1 title:      | Human responses to Middle Holocene climate change ...                                        |
| Pub. 1 authors:    | Kennett, Douglas J.; Kennett, James P.; Erlandson,...                                        |
| Pub. 1 year:       | 2007                                                                                         |
| Pub. 1 DOI:        | 10.1016/j.quascirev.2006.07.019                                                              |
| Original data URL: | <a href="http://www.ncdc.noaa.gov/paleo/study/27330">www.ncdc.noaa.gov/paleo/study/27330</a> |

Proxy data and metadata  
MarineSediment | d18O | 893A.Kennet.2007 | LPD28794972dp\_SST\_from\_d18O2

Proxy time series: temperature

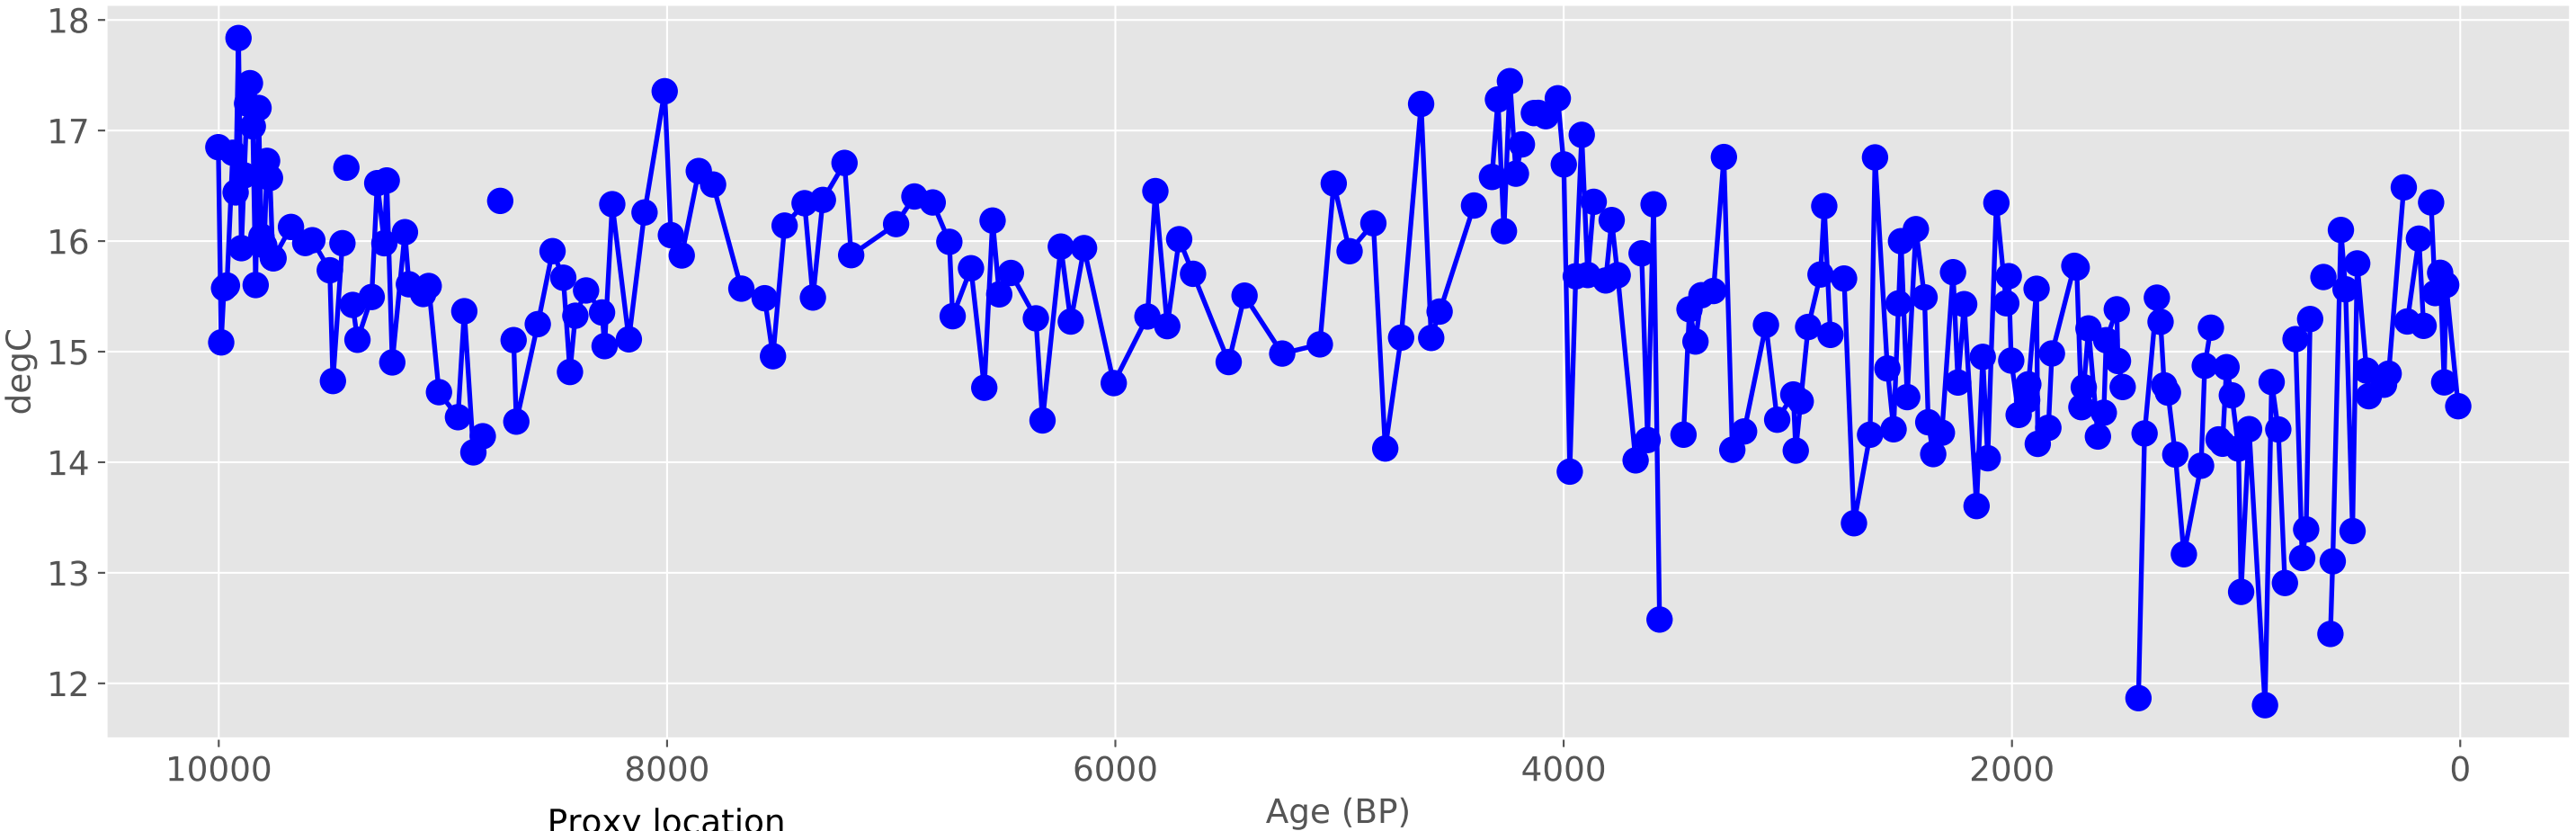

Proxy location  
(34.29 ° N, 120.04 ° W)



|                    |                                                                                              |
|--------------------|----------------------------------------------------------------------------------------------|
| Dataset name:      | 893A.Kennet.2007                                                                             |
| Archive type:      | MarineSediment                                                                               |
| Proxy type:        | d18O                                                                                         |
| Variable name:     | temperature                                                                                  |
| Latitude ( ° N):   | 34.2875                                                                                      |
| Longitude ( ° E):  | -120.036                                                                                     |
| Elevation (m):     | -588.0                                                                                       |
| Interp. variable:  | T                                                                                            |
| Interp. detail:    | sea@surface                                                                                  |
| Interp. season:    | annual                                                                                       |
| Interp. direction: | positive                                                                                     |
| Pub. 1 title:      | Human responses to Middle Holocene climate change ...                                        |
| Pub. 1 authors:    | Kennett, Douglas J.; Kennett, James P.; Erlandson,...                                        |
| Pub. 1 year:       | 2007                                                                                         |
| Pub. 1 DOI:        | 10.1016/j.quascirev.2006.07.019                                                              |
| Original data URL: | <a href="http://www.ncdc.noaa.gov/paleo/study/27330">www.ncdc.noaa.gov/paleo/study/27330</a> |

Proxy data and metadata

MarineSediment | d18O | EN32\_PC6.Flower.2004 | T2L\_EN32\_PC6\_d18o\_ruber\_SST\_from\_d18o\_ru...

Proxy time series: temperature

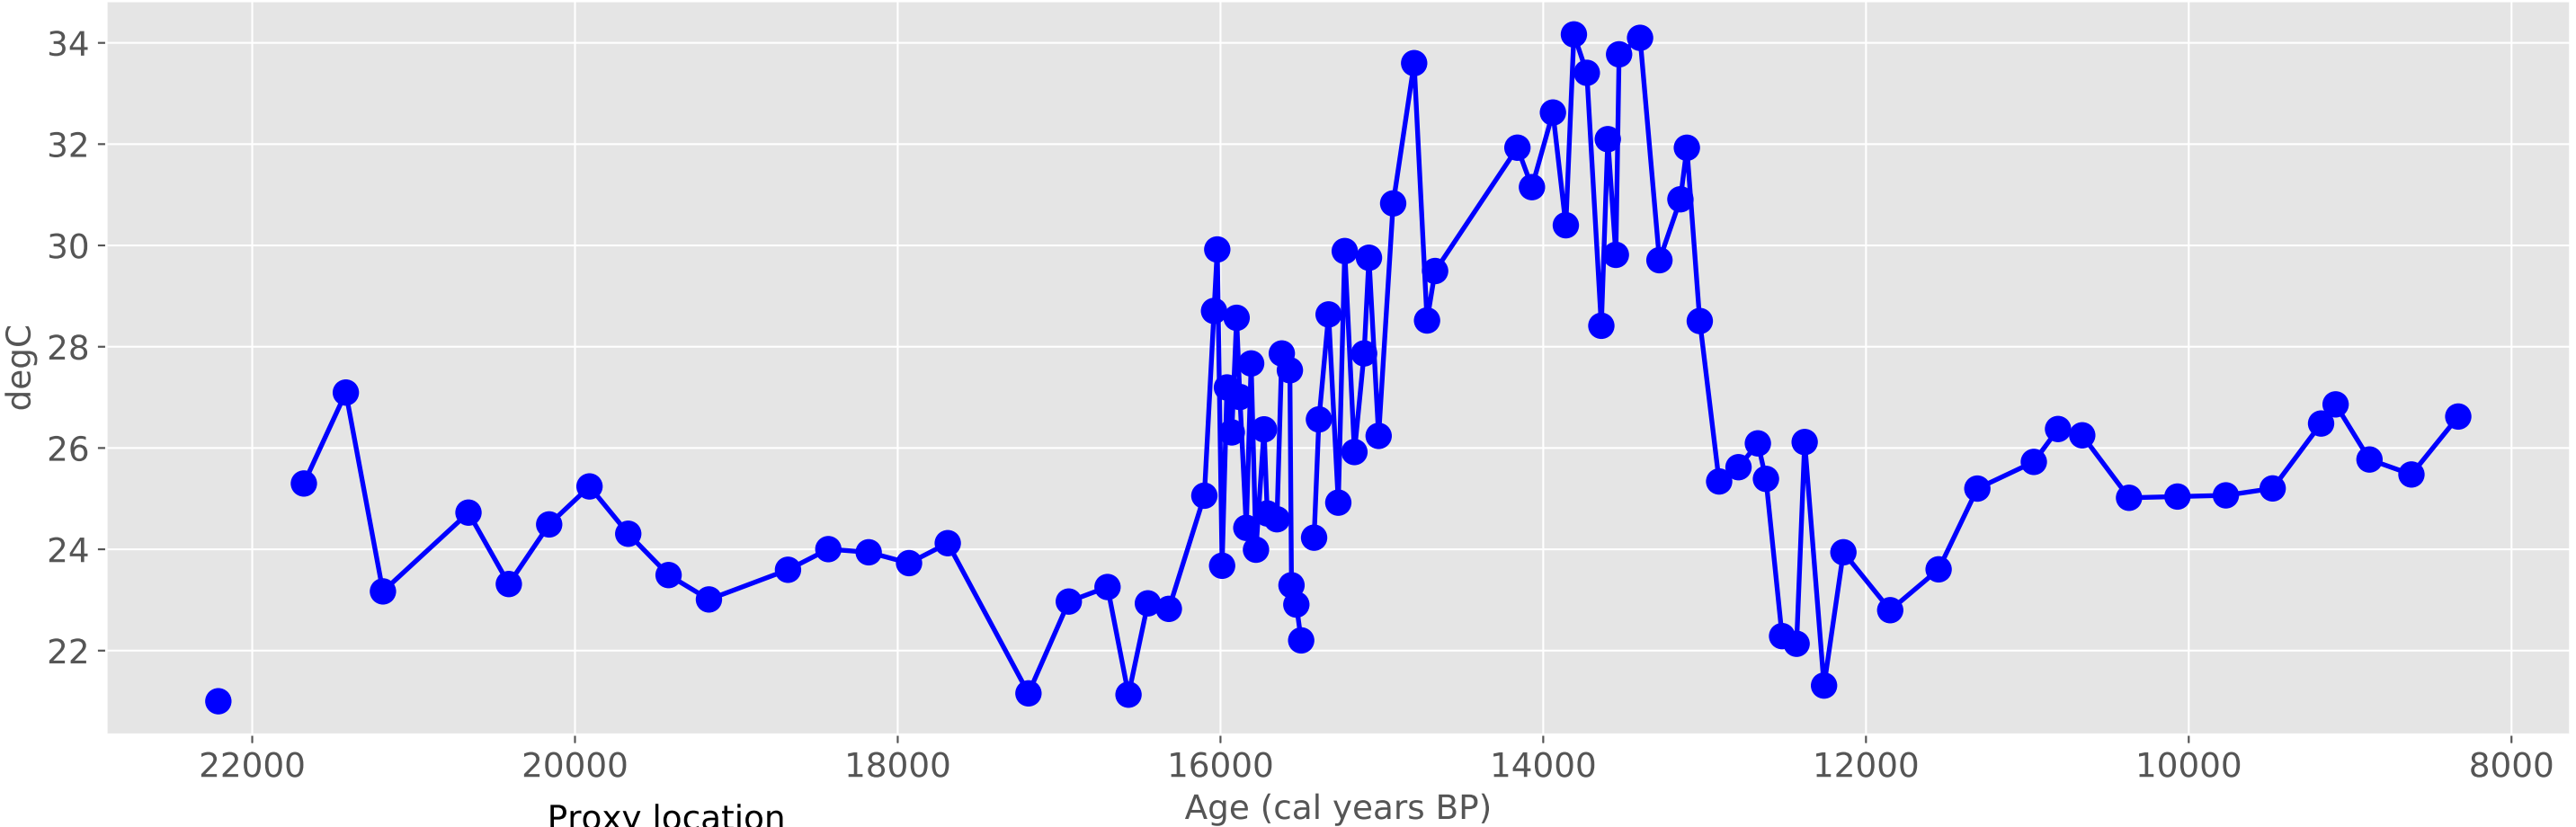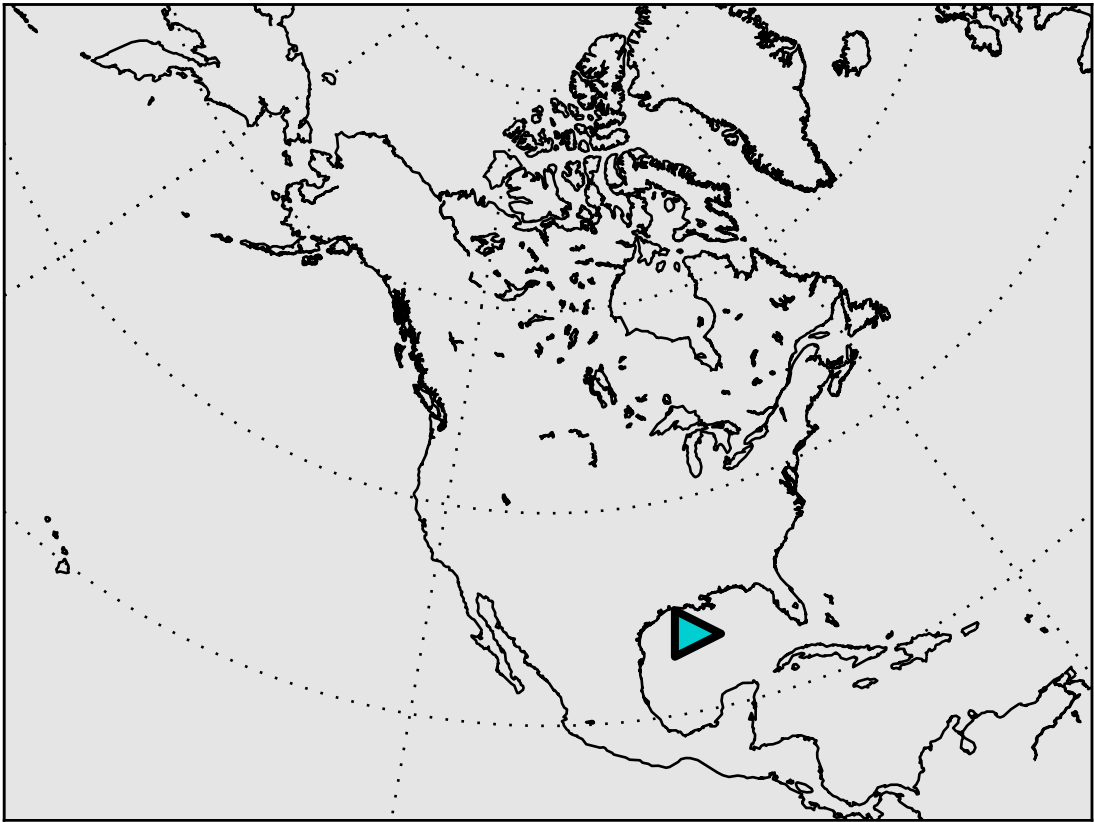

|                    |                                                                                              |
|--------------------|----------------------------------------------------------------------------------------------|
| Dataset name:      | EN32_PC6.Flower.2004                                                                         |
| Archive type:      | MarineSediment                                                                               |
| Proxy type:        | d18O                                                                                         |
| Variable name:     | temperature                                                                                  |
| Latitude ( ° N):   | 26.946                                                                                       |
| Longitude ( ° E):  | -91.35                                                                                       |
| Elevation (m):     | -2280.0                                                                                      |
| Interp. variable:  | T                                                                                            |
| Interp. detail:    | sea@surface                                                                                  |
| Interp. season:    | annual                                                                                       |
| Interp. direction: | positive                                                                                     |
| Pub. 1 title:      | Phasing of deglacial warming and Laurentide Ice Sh...                                        |
| Pub. 1 authors:    | Flower, Benjamin P.; Hastings, David W.; Hill, Hea...                                        |
| Pub. 1 year:       | 2004                                                                                         |
| Pub. 1 DOI:        | 10.1130/G20604.1                                                                             |
| Original data URL: | <a href="http://www.ncdc.noaa.gov/paleo/study/27330">www.ncdc.noaa.gov/paleo/study/27330</a> |

Proxy data and metadata

MarineSediment | d18O | KNR159\_JPC26.Antonarakou.2015 | T2L\_KNR159\_JPC26\_d18o\_ruber\_lato\_SST\_fro...

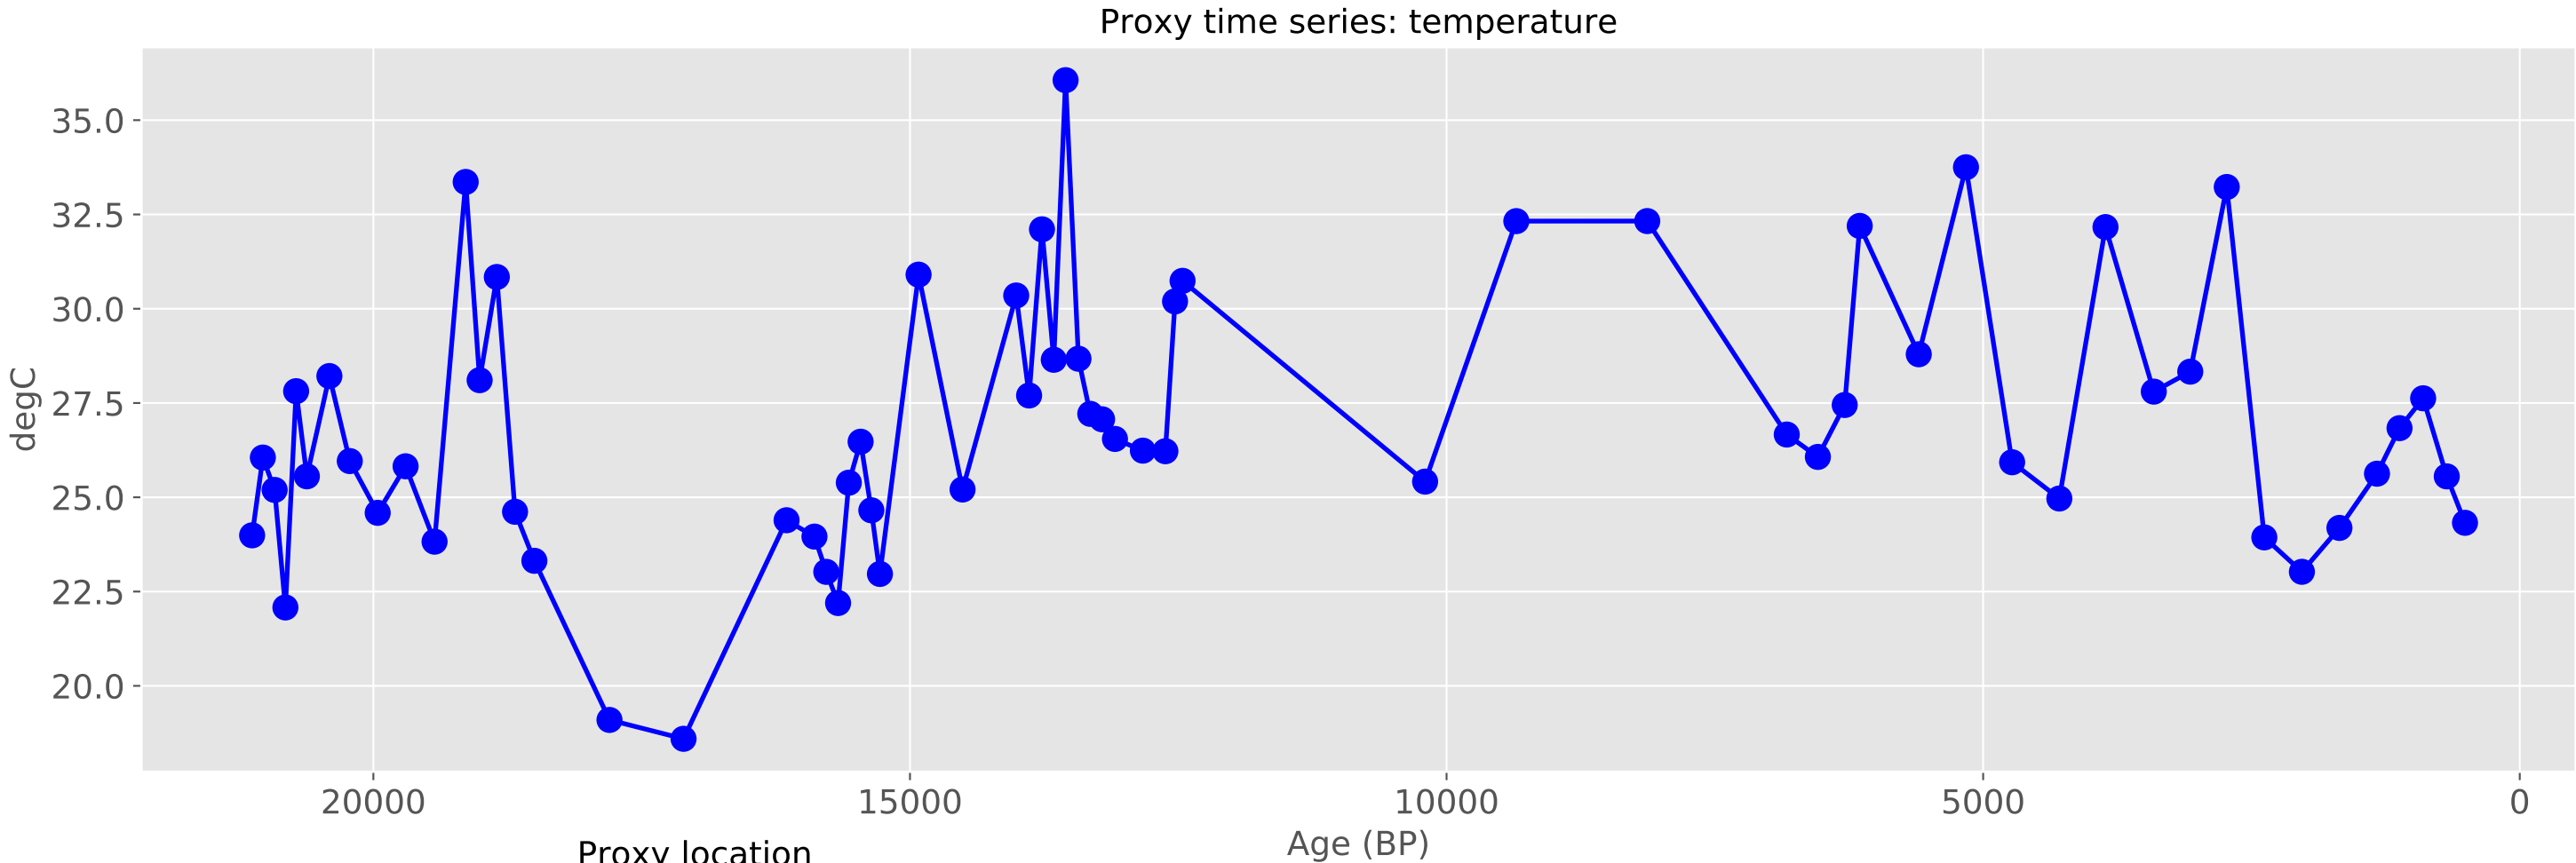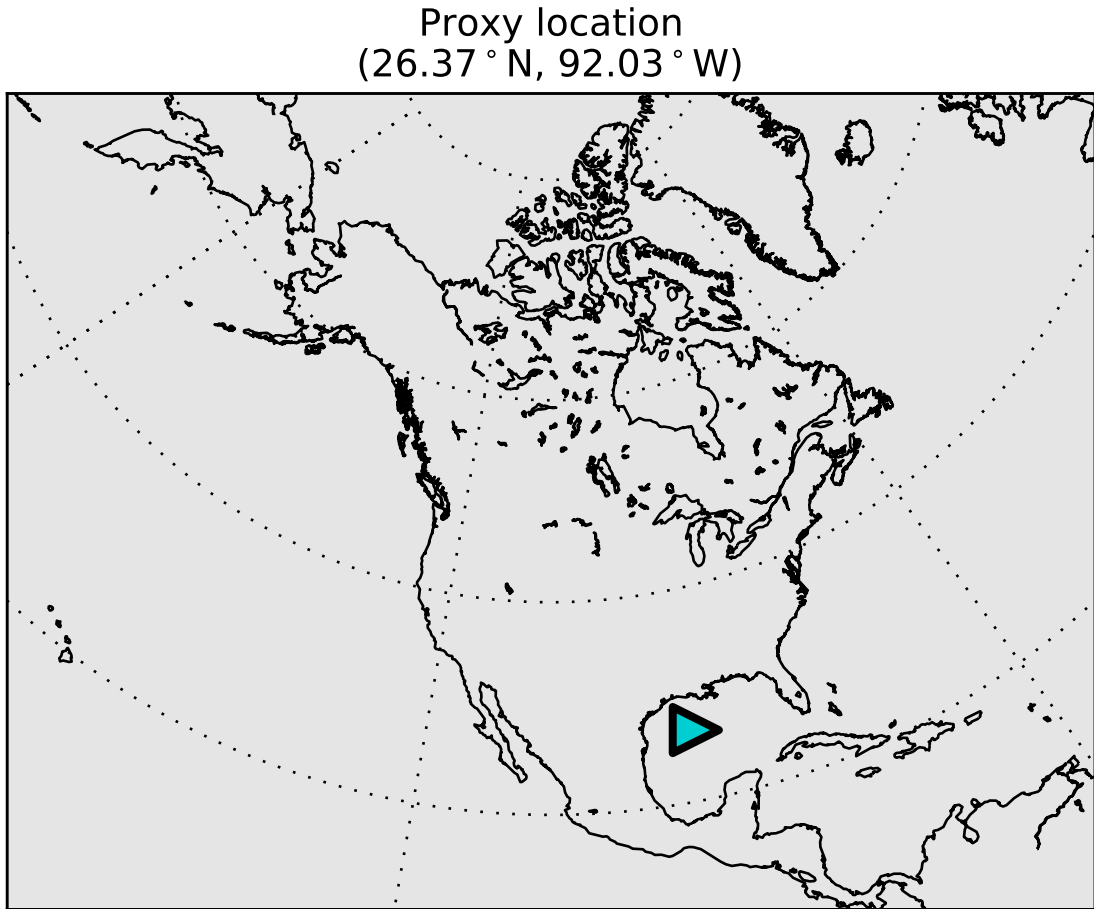

|                    |                                                       |
|--------------------|-------------------------------------------------------|
| Dataset name:      | KNR159_JPC26.Antonarakou.2015                         |
| Archive type:      | MarineSediment                                        |
| Proxy type:        | d18O                                                  |
| Variable name:     | temperature                                           |
| Latitude ( ° N):   | 26.374                                                |
| Longitude ( ° E):  | -92.027                                               |
| Elevation (m):     | -1995.0                                               |
| Interp. variable:  | T                                                     |
| Interp. detail:    | sea@surface                                           |
| Interp. season:    | annual                                                |
| Interp. direction: | positive                                              |
| Pub. 1 title:      | Biotic and geochemical ( 18 O, 13 C, Mg/Ca, B...      |
| Pub. 1 authors:    | Antonarakou, A.; Kontakiotis, G.; Mortyn, P.G.; Dr... |
| Pub. 1 year:       | 2015                                                  |
| Pub. 1 DOI:        | 10.1016/j.gca.2015.08.003                             |
| Original data URL: | www.ncdc.noaa.gov/paleo/study/27330                   |

Proxy data and metadata

MarineSediment | d18O | KNR159\_JPC26.Antonarakou.2015 | T2L\_KNR159\_JPC26\_d18o\_ruber\_stricto\_SST\_...

Proxy time series: temperature

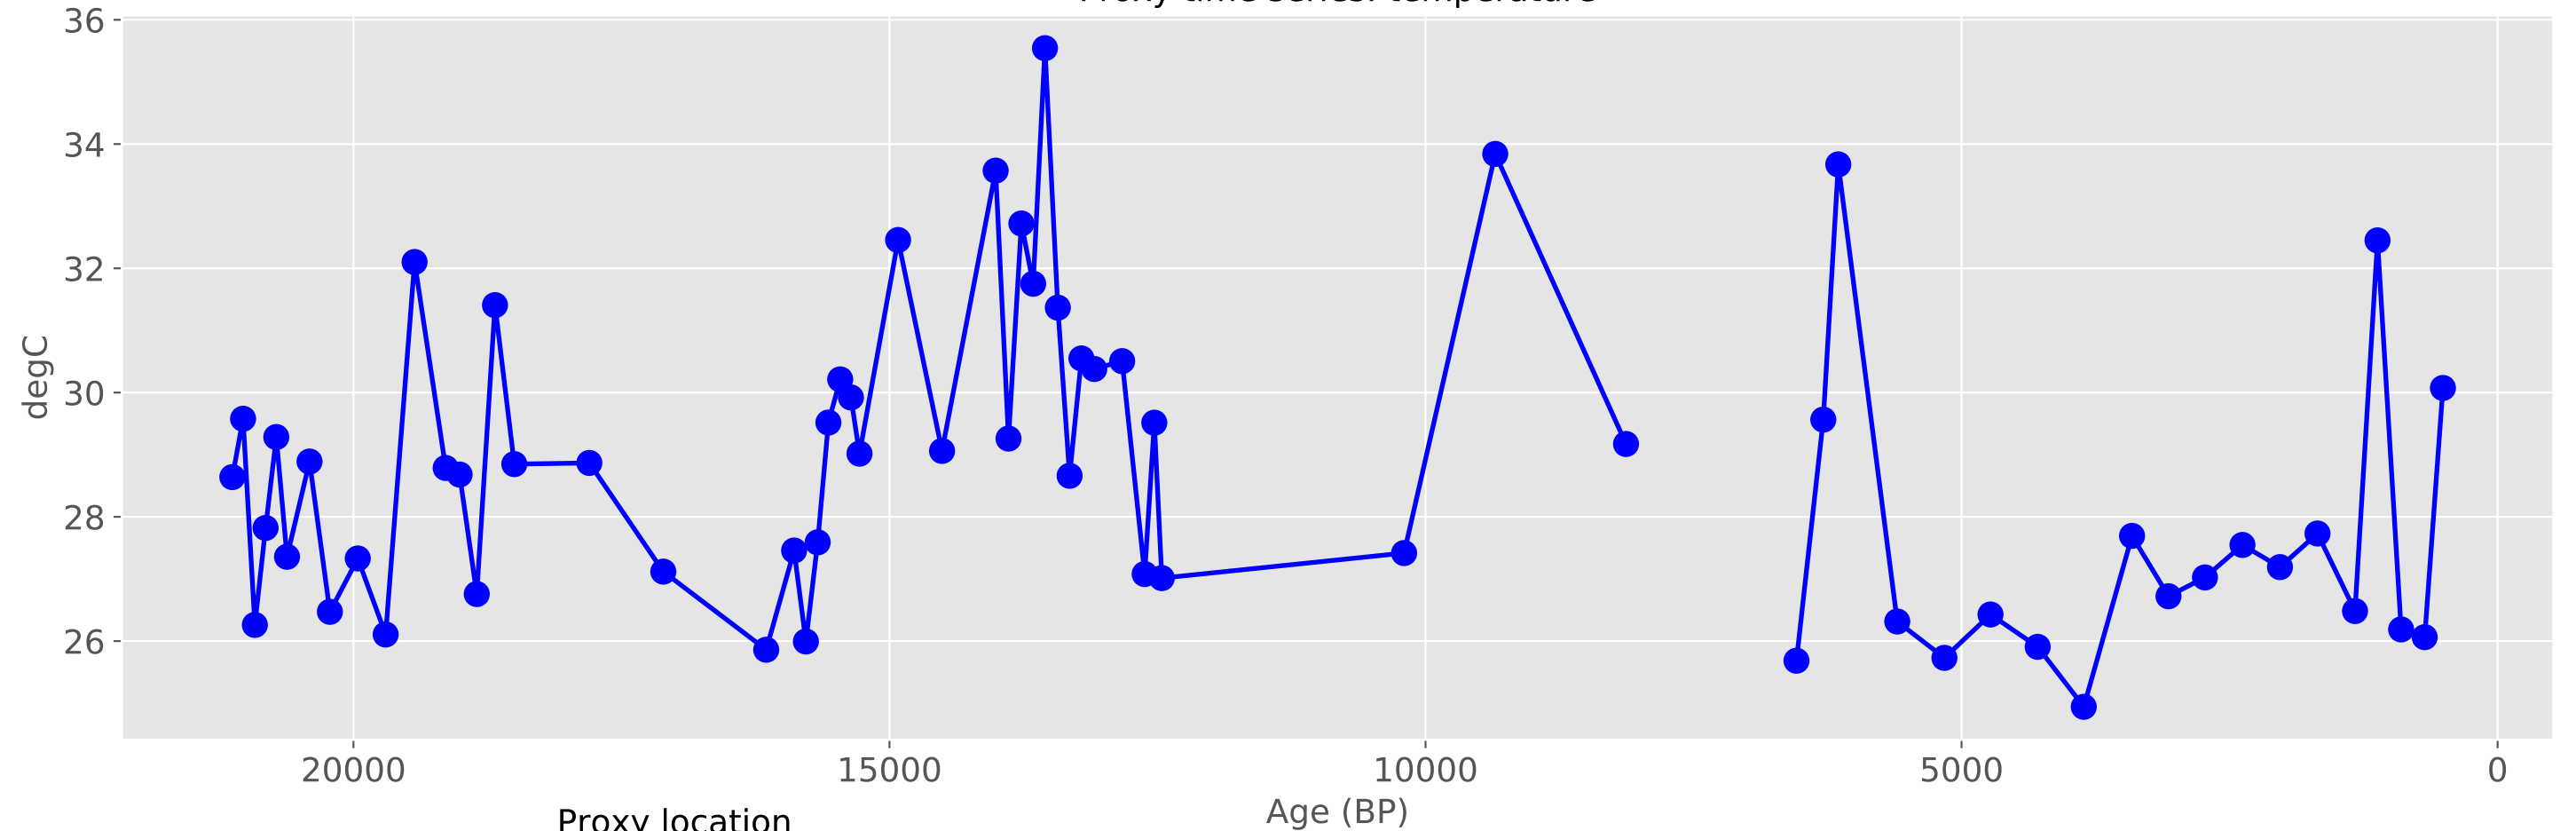

Proxy location  
(26.37 ° N, 92.03 ° W)

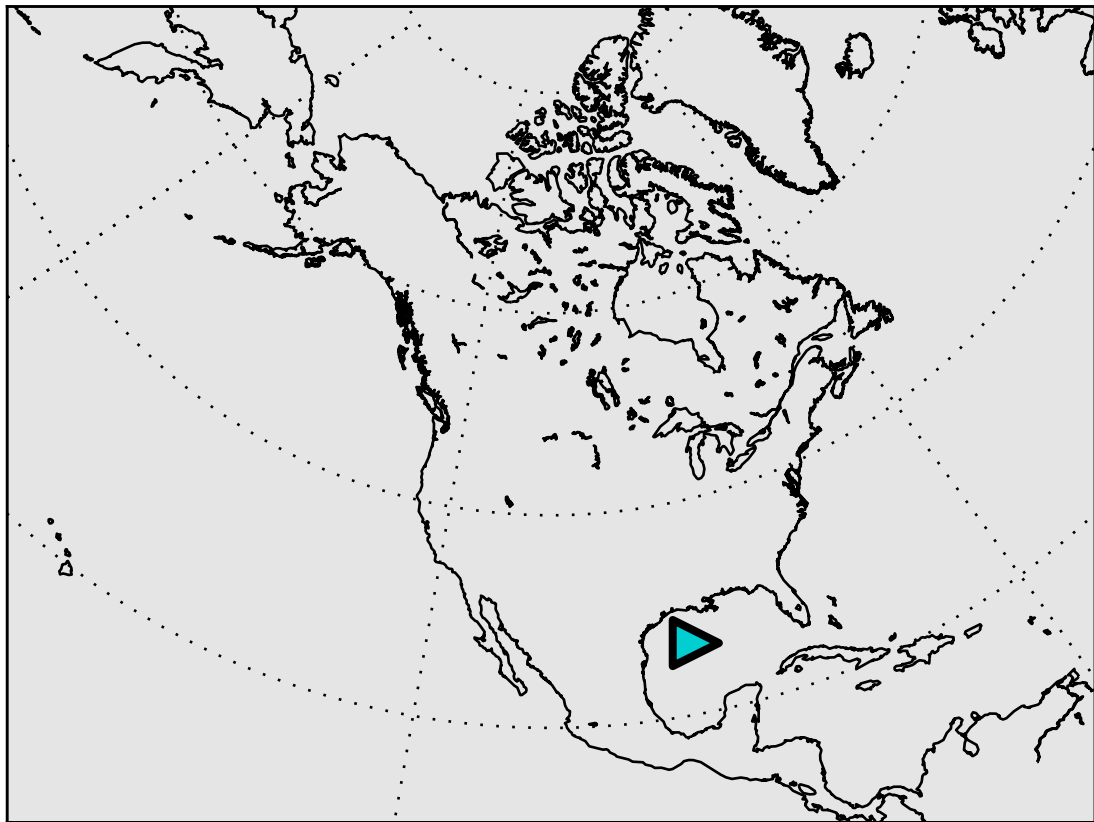

|                    |                                                       |
|--------------------|-------------------------------------------------------|
| Dataset name:      | KNR159_JPC26.Antonarakou.2015                         |
| Archive type:      | MarineSediment                                        |
| Proxy type:        | d18O                                                  |
| Variable name:     | temperature                                           |
| Latitude ( ° N):   | 26.374                                                |
| Longitude ( ° E):  | -92.027                                               |
| Elevation (m):     | -1995.0                                               |
| Interp. variable:  | T                                                     |
| Interp. detail:    | sea@surface                                           |
| Interp. season:    | annual                                                |
| Interp. direction: | positive                                              |
| Pub. 1 title:      | Biotic and geochemical ( 18 O, 13 C, Mg/Ca, B...      |
| Pub. 1 authors:    | Antonarakou, A.; Kontakiotis, G.; Mortyn, P.G.; Dr... |
| Pub. 1 year:       | 2015                                                  |
| Pub. 1 DOI:        | 10.1016/j.gca.2015.08.003                             |
| Original data URL: | www.ncdc.noaa.gov/paleo/study/27330                   |



Proxy data and metadata  
MarineSediment | dD | MD02-2517.Bhattacharya.2018 | WEB6485a41e

Proxy time series: precipitation

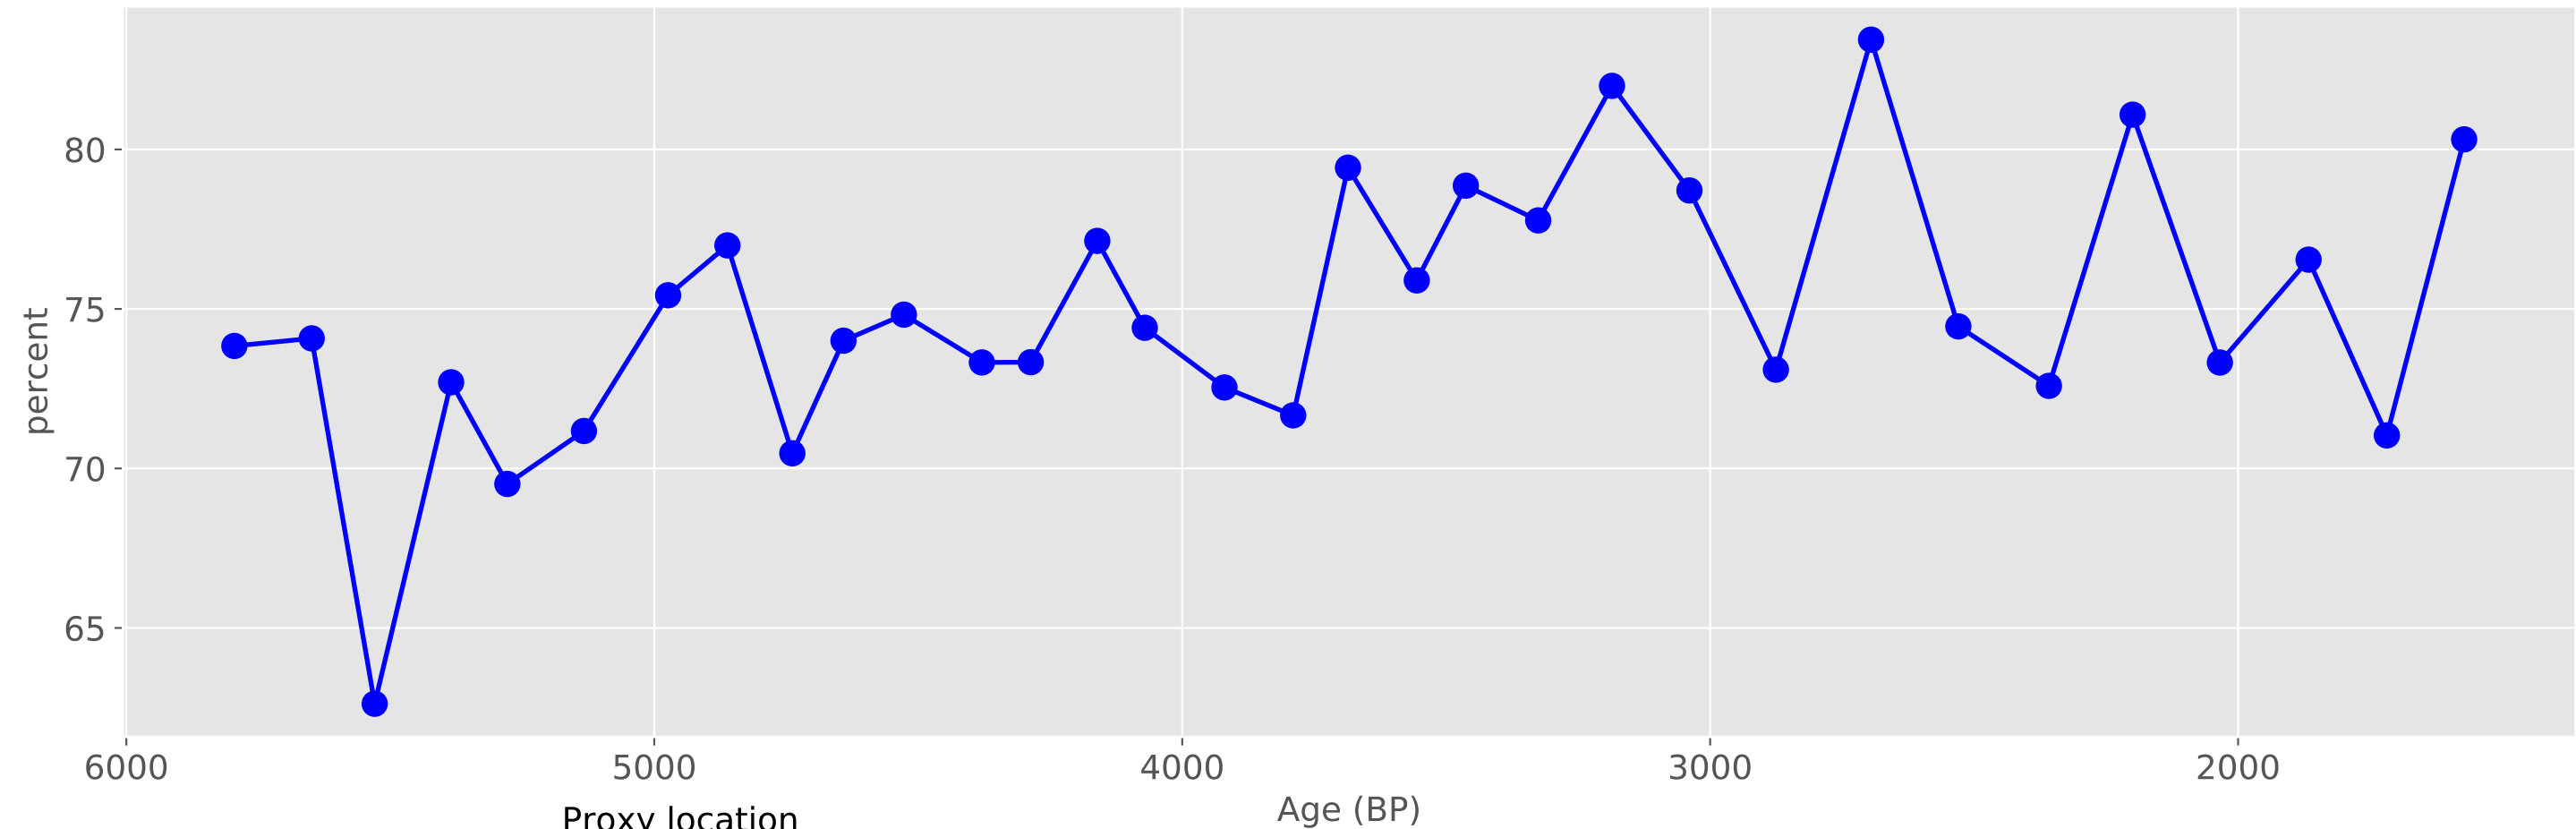

Proxy location  
(27.48 ° N, 112.07 ° W)

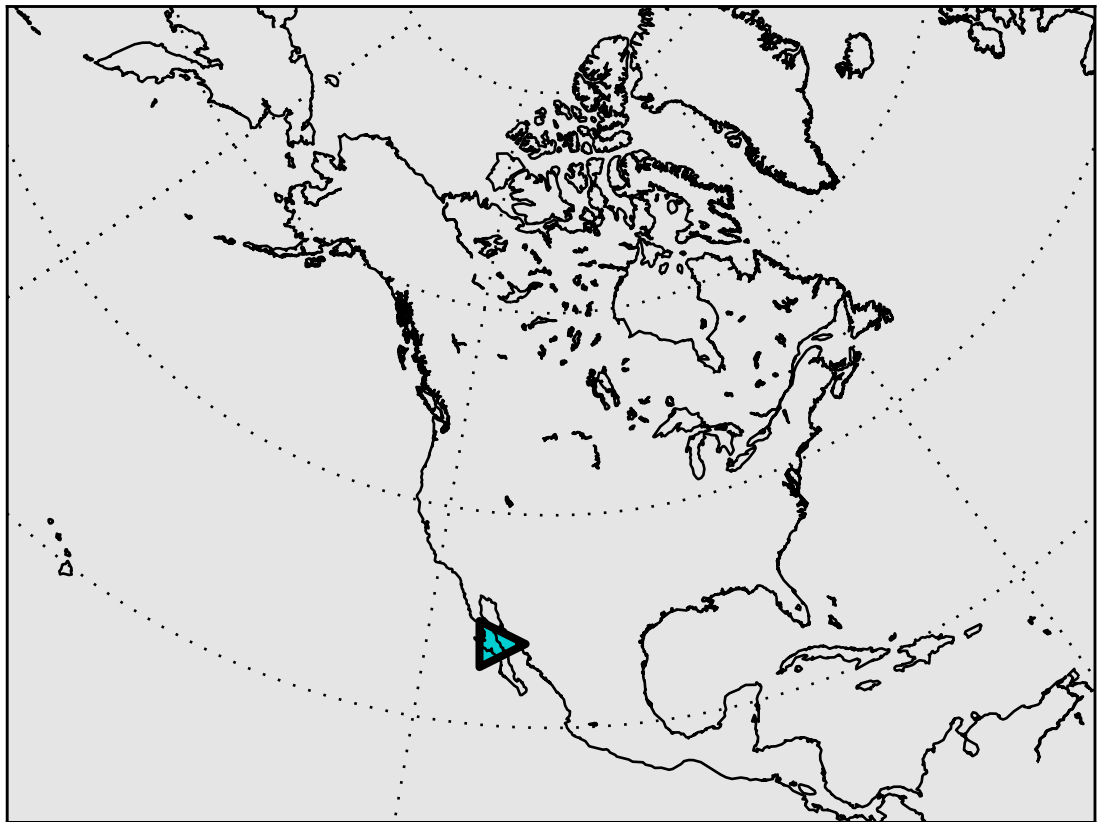

|                    |                                                                                              |
|--------------------|----------------------------------------------------------------------------------------------|
| Dataset name:      | MD02-2517.Bhattacharya.2018                                                                  |
| Archive type:      | MarineSediment                                                                               |
| Proxy type:        | dD                                                                                           |
| Variable name:     | precipitation                                                                                |
| Latitude ( ° N):   | 27.48                                                                                        |
| Longitude ( ° E):  | -112.07                                                                                      |
| Elevation (m):     | -881.0                                                                                       |
| Interp. variable:  | P                                                                                            |
| Interp. detail:    | @surface                                                                                     |
| Interp. season:    | summerOnly                                                                                   |
| Interp. direction: | positive                                                                                     |
| Pub. 1 title:      | Ice-sheet modulation of deglacial North American m...                                        |
| Pub. 1 authors:    | Bhattacharya, Tripti;Tierney, Jessica E.;Addison, ...                                        |
| Pub. 1 year:       | 2018                                                                                         |
| Pub. 1 DOI:        | 10.1038/s41561-018-0220-7                                                                    |
| Original data URL: | <a href="http://www.ncdc.noaa.gov/paleo/study/24890">www.ncdc.noaa.gov/paleo/study/24890</a> |

Proxy data and metadata

MarineSediment | dD | MD02-2515.Bhattacharya.2018 | WEBb2aba08b

Proxy time series: precipitation

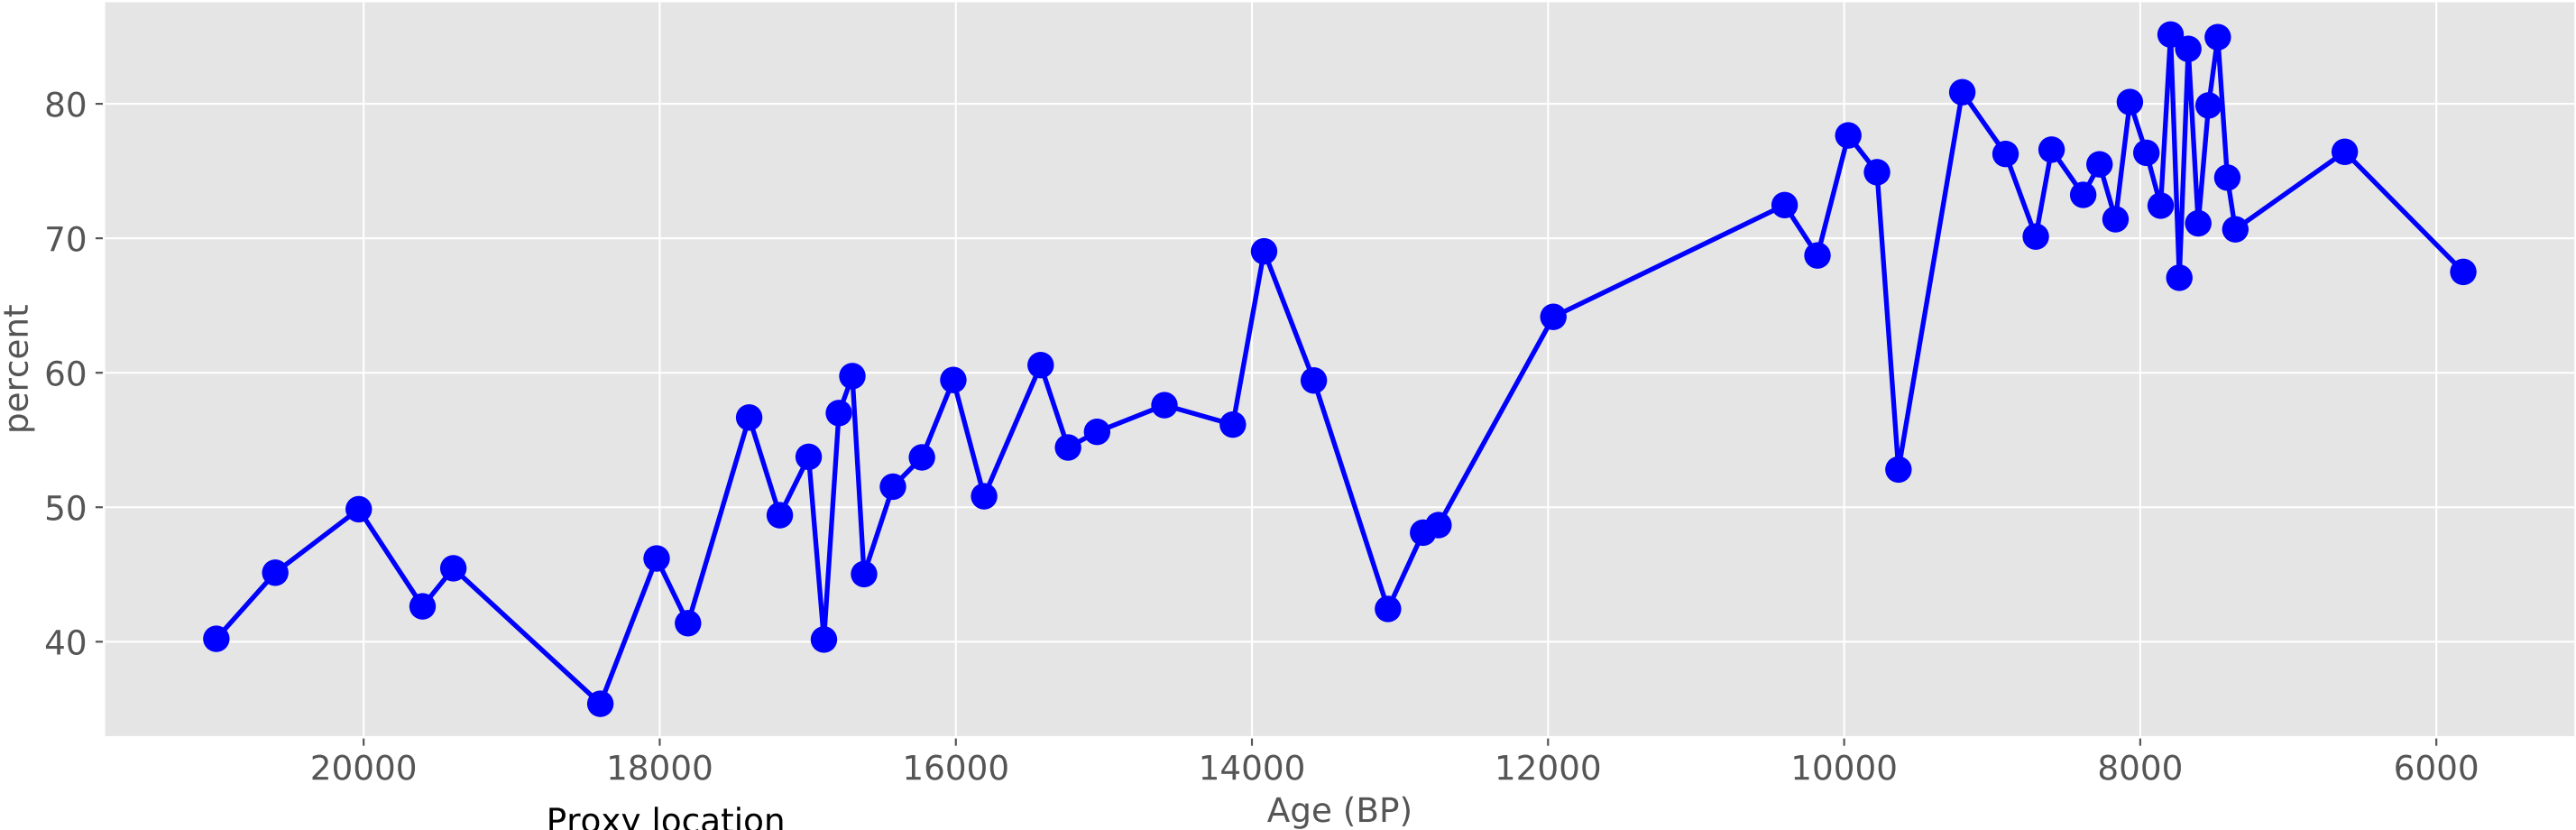

Proxy location  
(27.48 ° N, 112.07 ° W)



|                    |                                                                                              |
|--------------------|----------------------------------------------------------------------------------------------|
| Dataset name:      | MD02-2515.Bhattacharya.2018                                                                  |
| Archive type:      | MarineSediment                                                                               |
| Proxy type:        | dD                                                                                           |
| Variable name:     | precipitation                                                                                |
| Latitude ( ° N):   | 27.48                                                                                        |
| Longitude ( ° E):  | -112.07                                                                                      |
| Elevation (m):     | -881.0                                                                                       |
| Interp. variable:  | P                                                                                            |
| Interp. detail:    | @surface                                                                                     |
| Interp. season:    | summerOnly                                                                                   |
| Interp. direction: | positive                                                                                     |
| Pub. 1 title:      | Ice-sheet modulation of deglacial North American m...                                        |
| Pub. 1 authors:    | Bhattacharya, Tripti;Tierney, Jessica E.;Addison, ...                                        |
| Pub. 1 year:       | 2018                                                                                         |
| Pub. 1 DOI:        | 10.1038/s41561-018-0220-7                                                                    |
| Original data URL: | <a href="http://www.ncdc.noaa.gov/paleo/study/24890">www.ncdc.noaa.gov/paleo/study/24890</a> |

Proxy data and metadata

MarineSediment | dD | NH-8P.Bhattacharya.2018 | WEBdf73c287

Proxy time series: precipitation

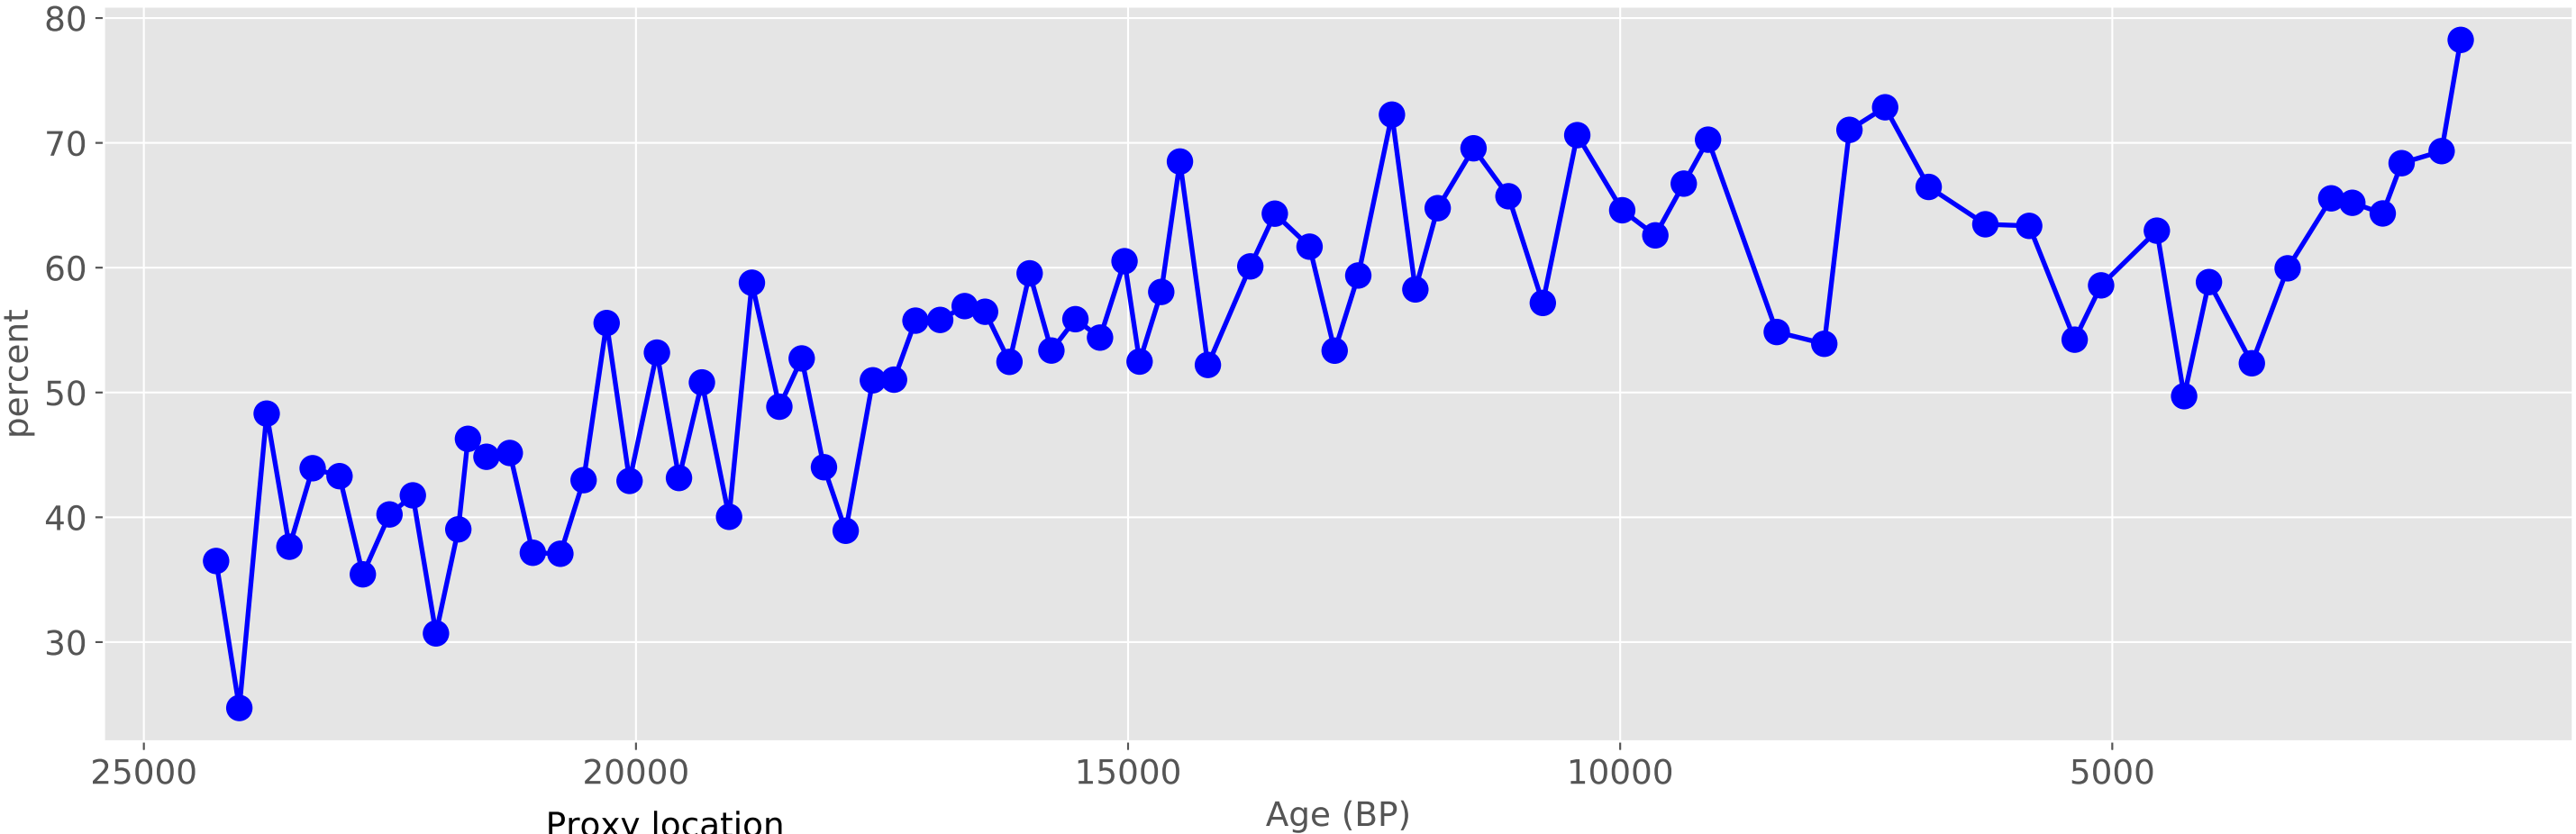

Proxy location  
(22.23 ° N, 107.05 ° W)

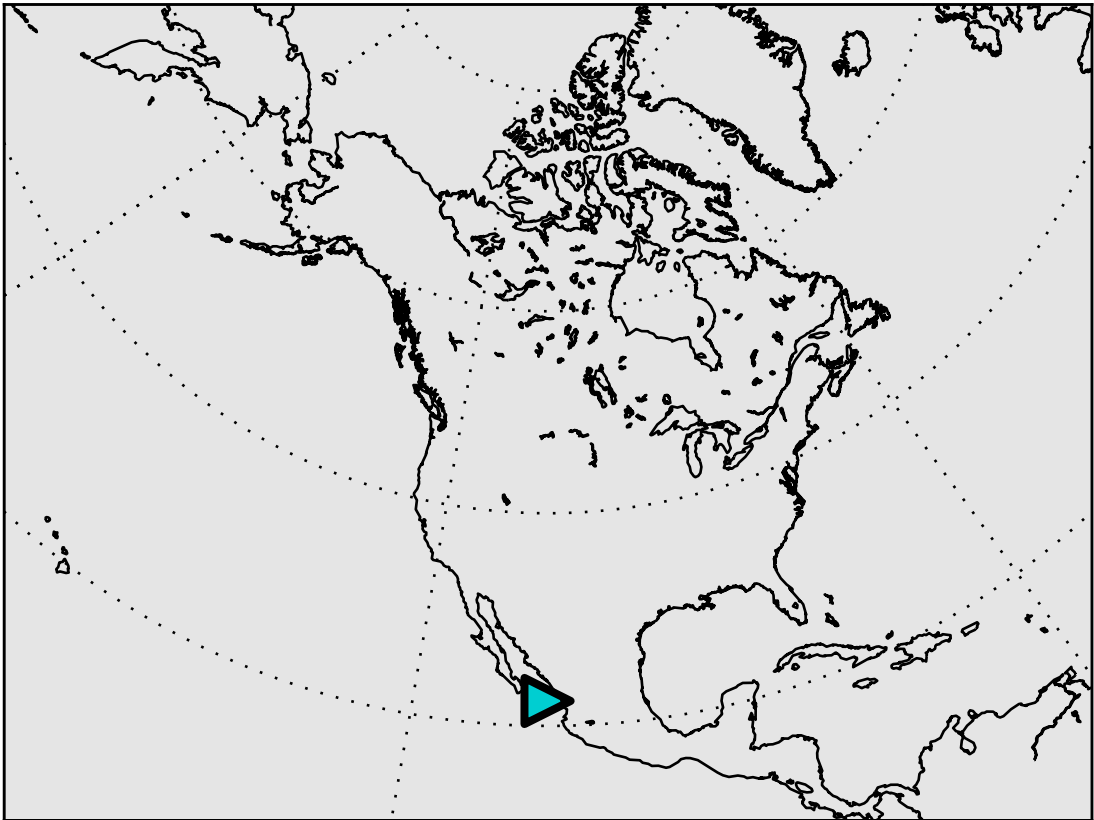

|                    |                                                       |
|--------------------|-------------------------------------------------------|
| Dataset name:      | NH-8P.Bhattacharya.2018                               |
| Archive type:      | MarineSediment                                        |
| Proxy type:        | dD                                                    |
| Variable name:     | precipitation                                         |
| Latitude ( ° N):   | 22.23                                                 |
| Longitude ( ° E):  | -107.05                                               |
| Elevation (m):     | -1018.0                                               |
| Interp. variable:  | P                                                     |
| Interp. detail:    | @surface                                              |
| Interp. season:    | summerOnly                                            |
| Interp. direction: | positive                                              |
| Pub. 1 title:      | Ice-sheet modulation of deglacial North American m... |
| Pub. 1 authors:    | Bhattacharya, Tripti;Tierney, Jessica E.;Addison, ... |
| Pub. 1 year:       | 2018                                                  |
| Pub. 1 DOI:        | 10.1038/s41561-018-0220-7                             |
| Original data URL: | www.ncdc.noaa.gov/paleo/study/24890                   |

Proxy data and metadata

MarineSediment | diatom | W8709-13PC.Lopez.2018 | WEB5be0ab9d

Proxy time series: temperature

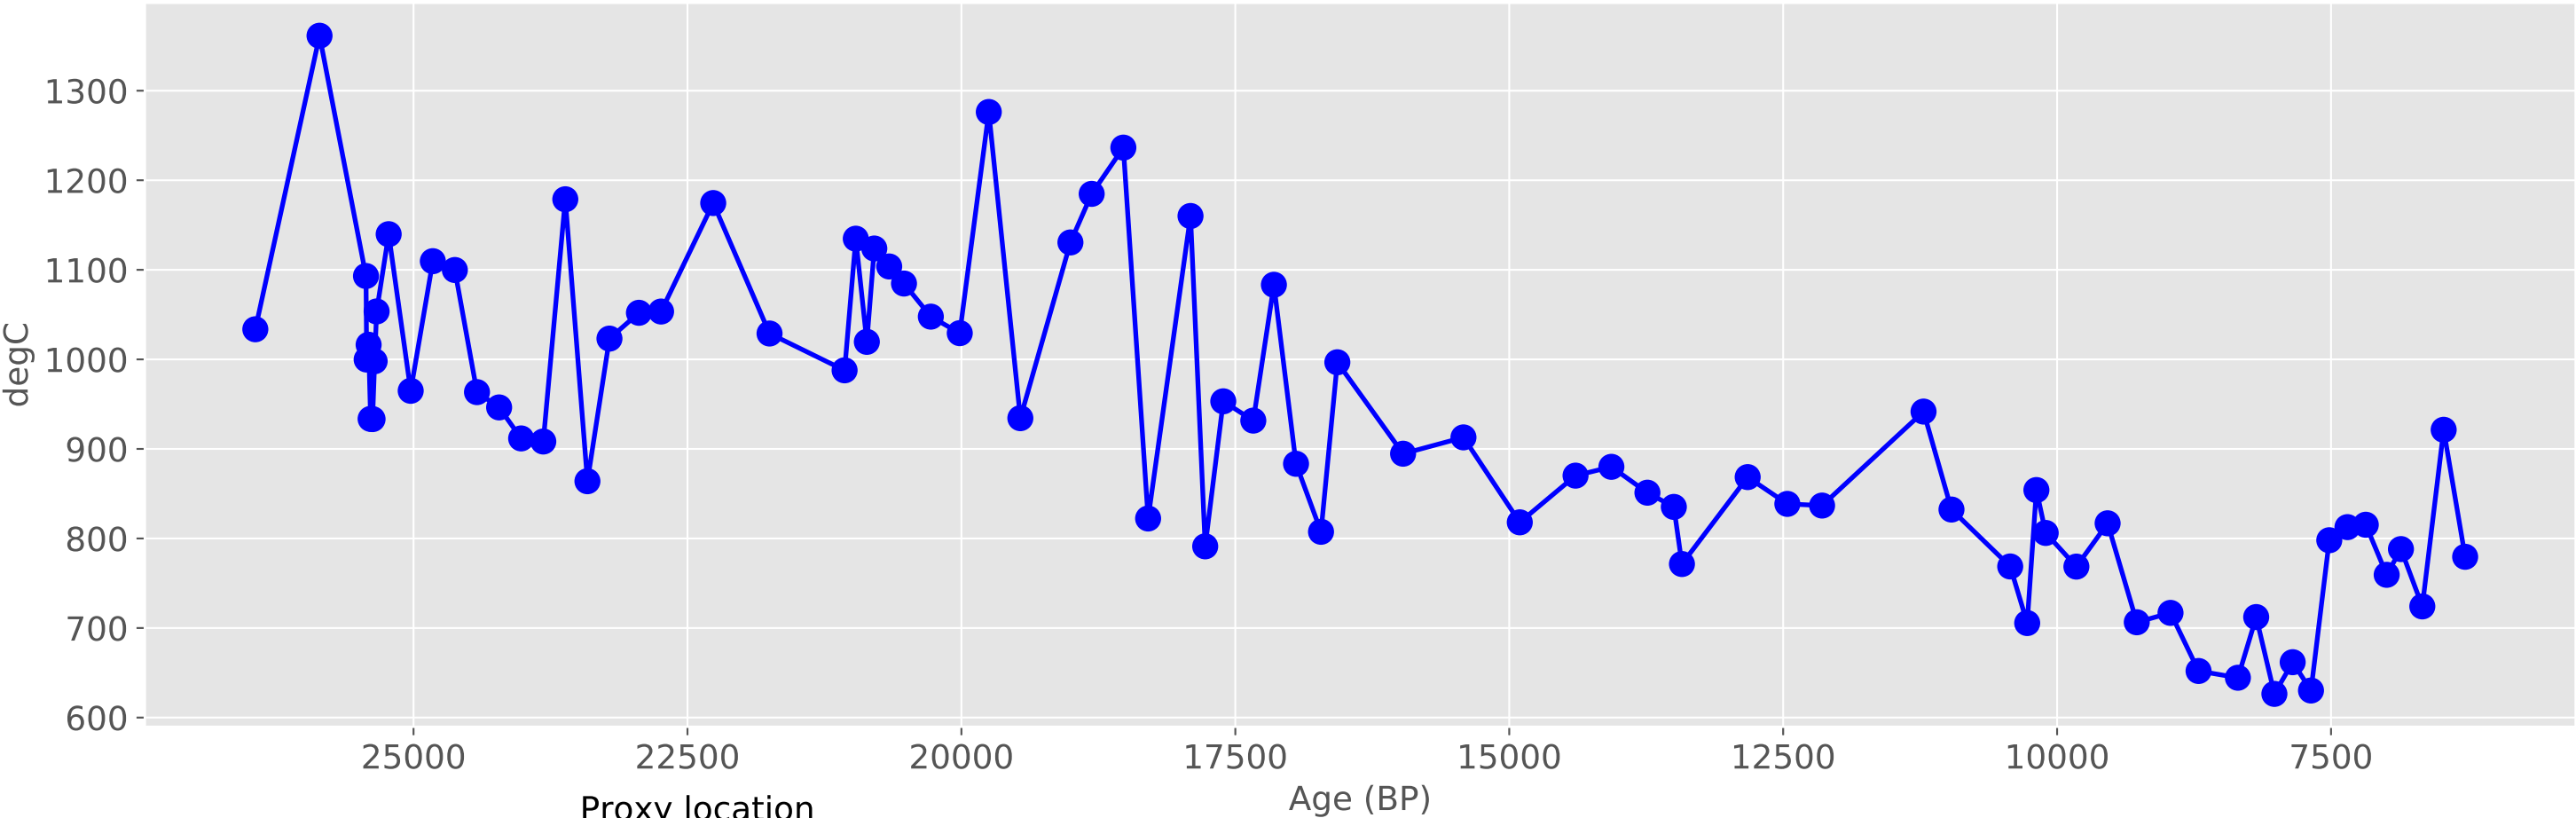

Proxy location  
(42.12 ° N, 125.75 ° W)

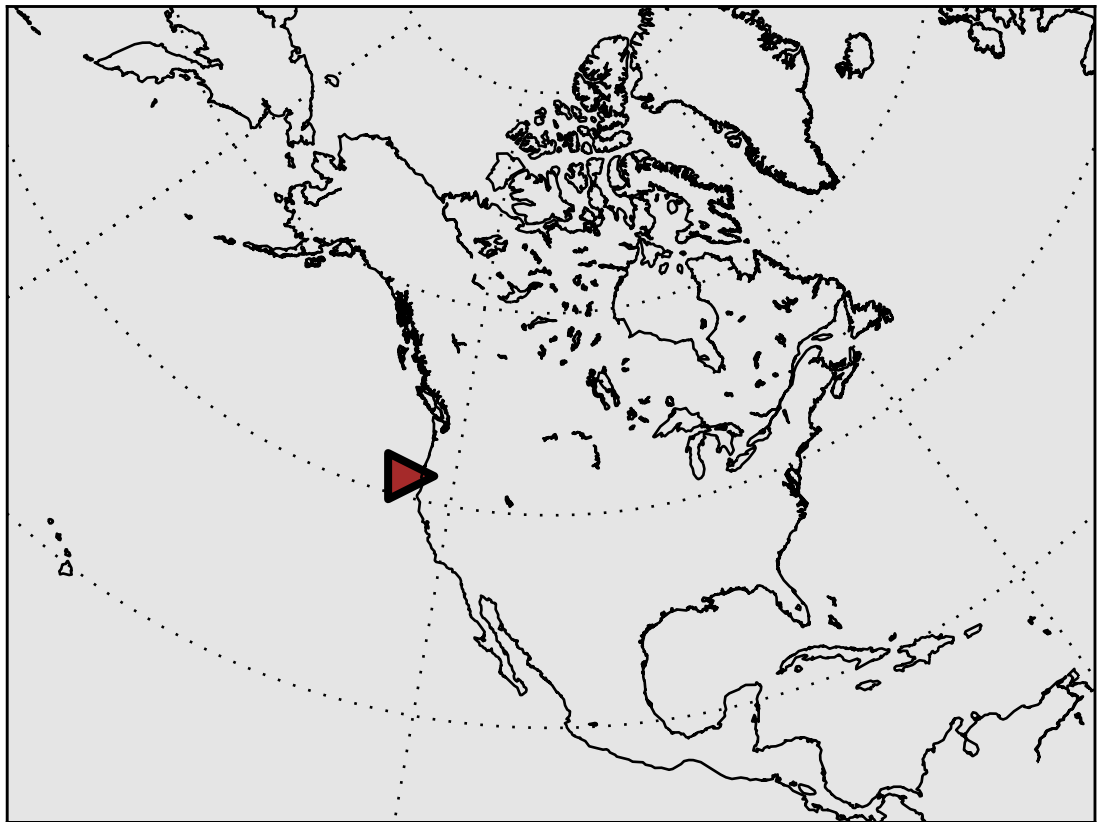

|                    |                                                                                              |
|--------------------|----------------------------------------------------------------------------------------------|
| Dataset name:      | W8709-13PC.Lopez.2018                                                                        |
| Archive type:      | MarineSediment                                                                               |
| Proxy type:        | diatom                                                                                       |
| Variable name:     | temperature                                                                                  |
| Latitude ( ° N):   | 42.117                                                                                       |
| Longitude ( ° E):  | -125.75                                                                                      |
| Elevation (m):     | -2712.0                                                                                      |
| Interp. variable:  | T                                                                                            |
| Interp. detail:    | sea@surface                                                                                  |
| Interp. season:    | annual                                                                                       |
| Interp. direction: | positive                                                                                     |
| Pub. 1 title:      | North Pacific Paleotemperature and Paleoproductivi...                                        |
| Pub. 1 authors:    | Lopes, C.                                                                                    |
| Pub. 1 year:       | 2018                                                                                         |
| Pub. 1 DOI:        | 10.1029/2018PA003352                                                                         |
| Original data URL: | <a href="http://www.ncdc.noaa.gov/paleo/study/24150">www.ncdc.noaa.gov/paleo/study/24150</a> |

Proxy data and metadata  
MarineSediment | diatom | ODP1019.Lopez.2018 | WEB2f4b42df

Proxy time series: temperature

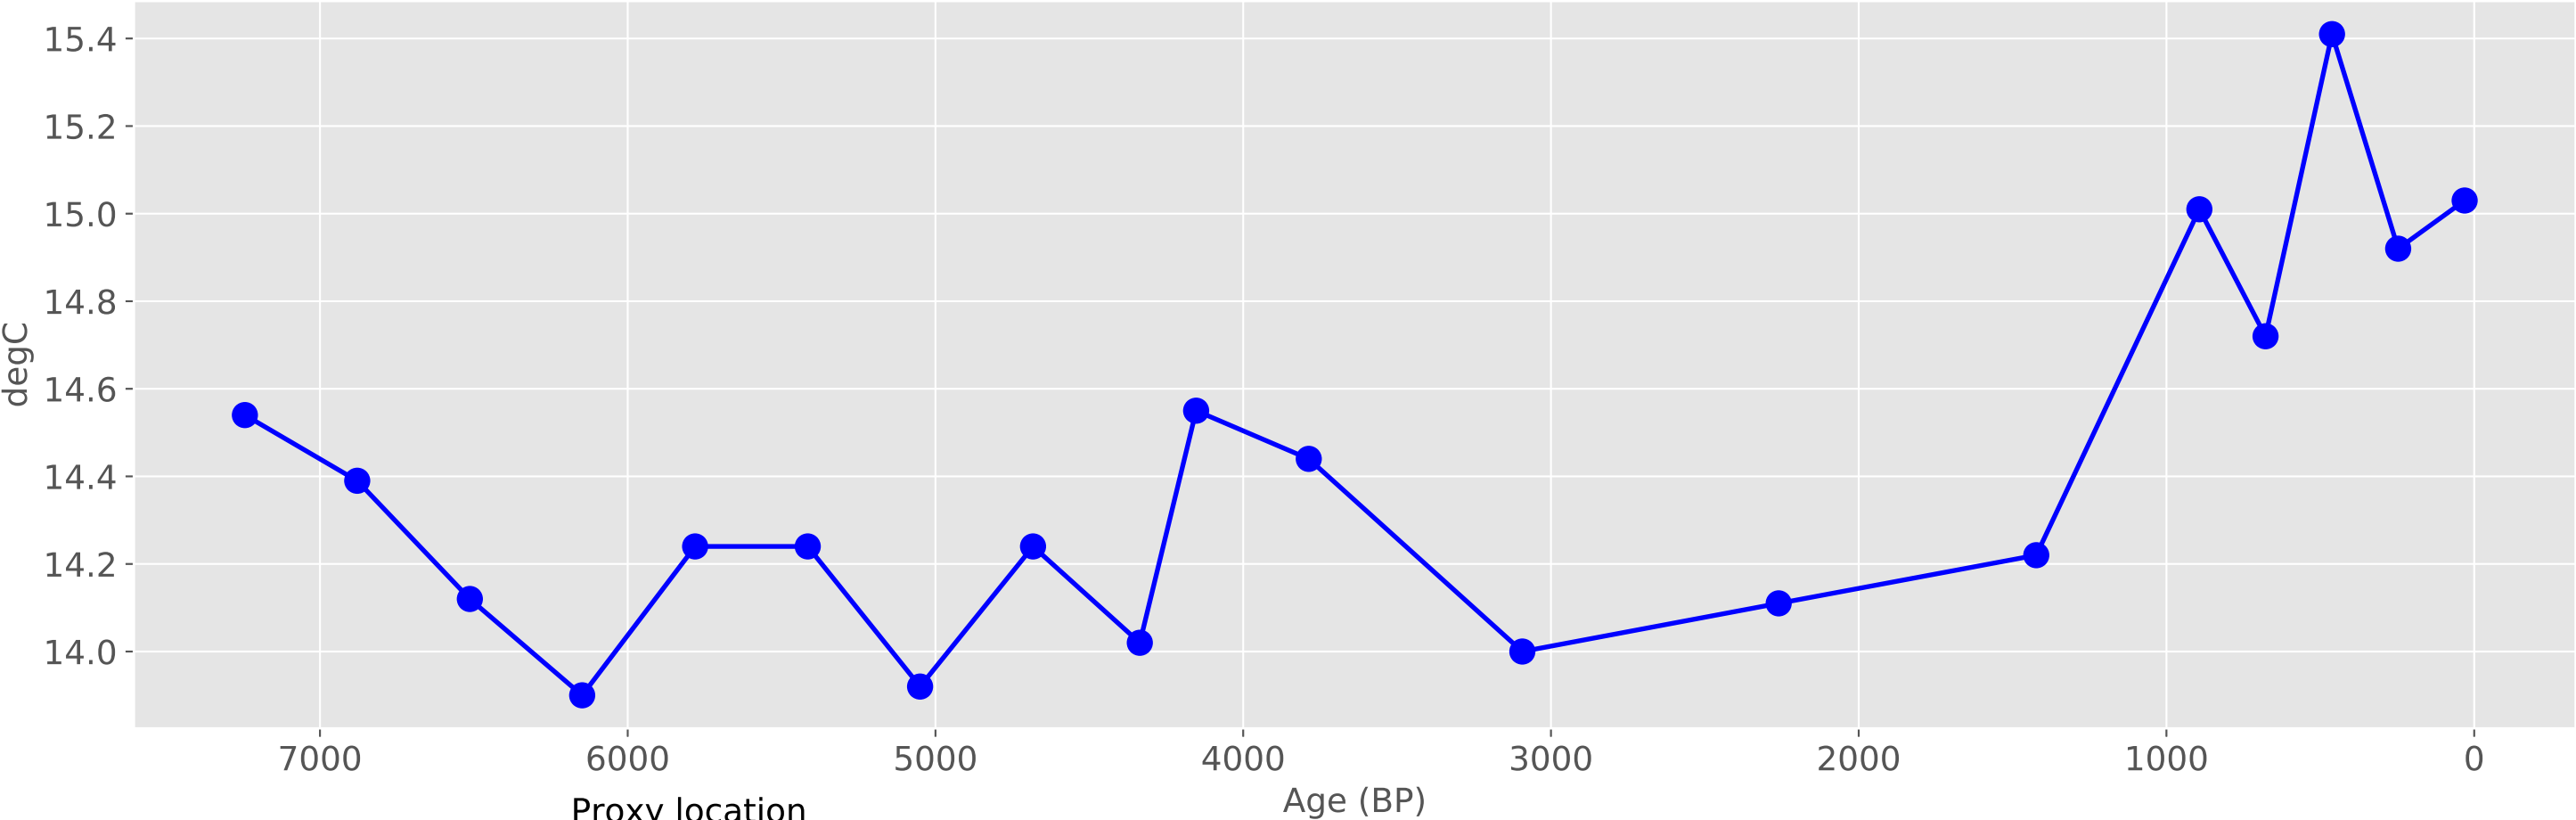

Proxy location  
(41.68 ° N, 124.93 ° W)

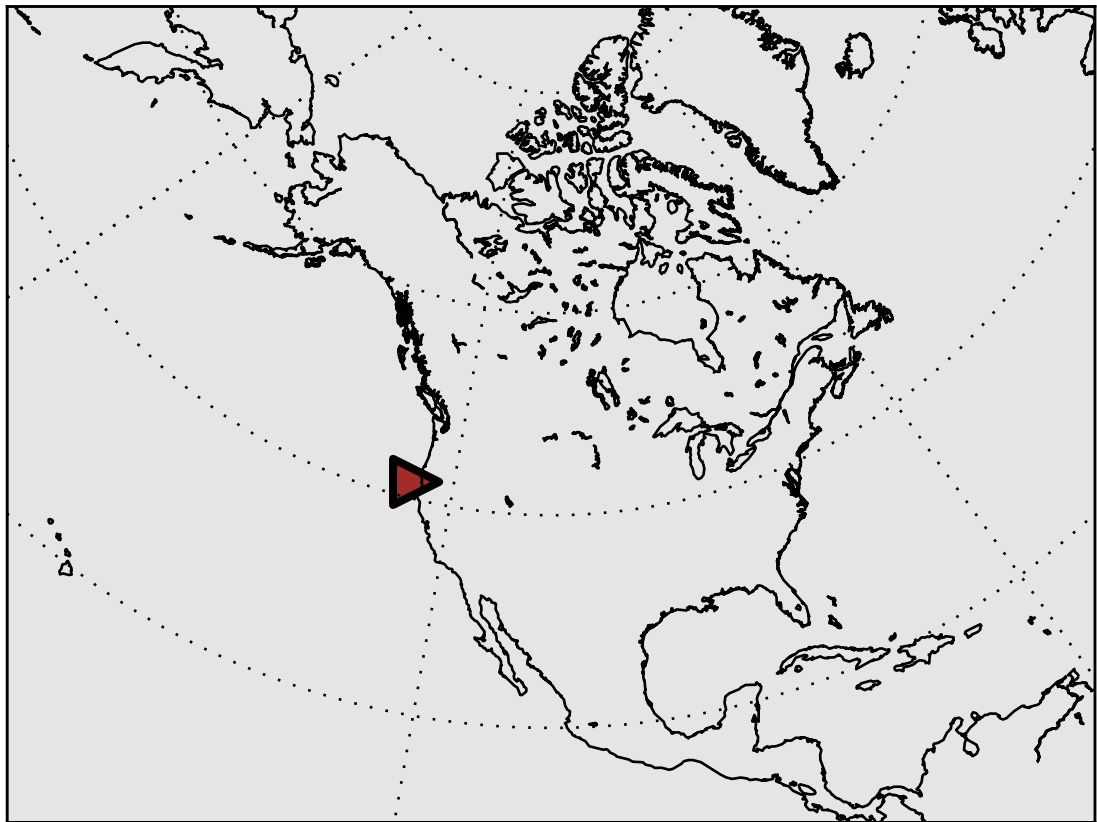

|                    |                                                                                              |
|--------------------|----------------------------------------------------------------------------------------------|
| Dataset name:      | ODP1019.Lopez.2018                                                                           |
| Archive type:      | MarineSediment                                                                               |
| Proxy type:        | diatom                                                                                       |
| Variable name:     | temperature                                                                                  |
| Latitude ( ° N):   | 41.683                                                                                       |
| Longitude ( ° E):  | -124.933                                                                                     |
| Elevation (m):     | -980.0                                                                                       |
| Interp. variable:  | T                                                                                            |
| Interp. detail:    | sea@surface                                                                                  |
| Interp. season:    | annual                                                                                       |
| Interp. direction: | positive                                                                                     |
| Pub. 1 title:      | North Pacific Paleotemperature and Paleoproductivi...                                        |
| Pub. 1 authors:    | Lopes, C.                                                                                    |
| Pub. 1 year:       | 2018                                                                                         |
| Pub. 1 DOI:        | 10.1029/2018PA003352                                                                         |
| Original data URL: | <a href="http://www.ncdc.noaa.gov/paleo/study/24150">www.ncdc.noaa.gov/paleo/study/24150</a> |

Proxy data and metadata  
MarineSediment | diatom | ODP1019.Barron.2003 | LPD87397223

Proxy time series: upwelling

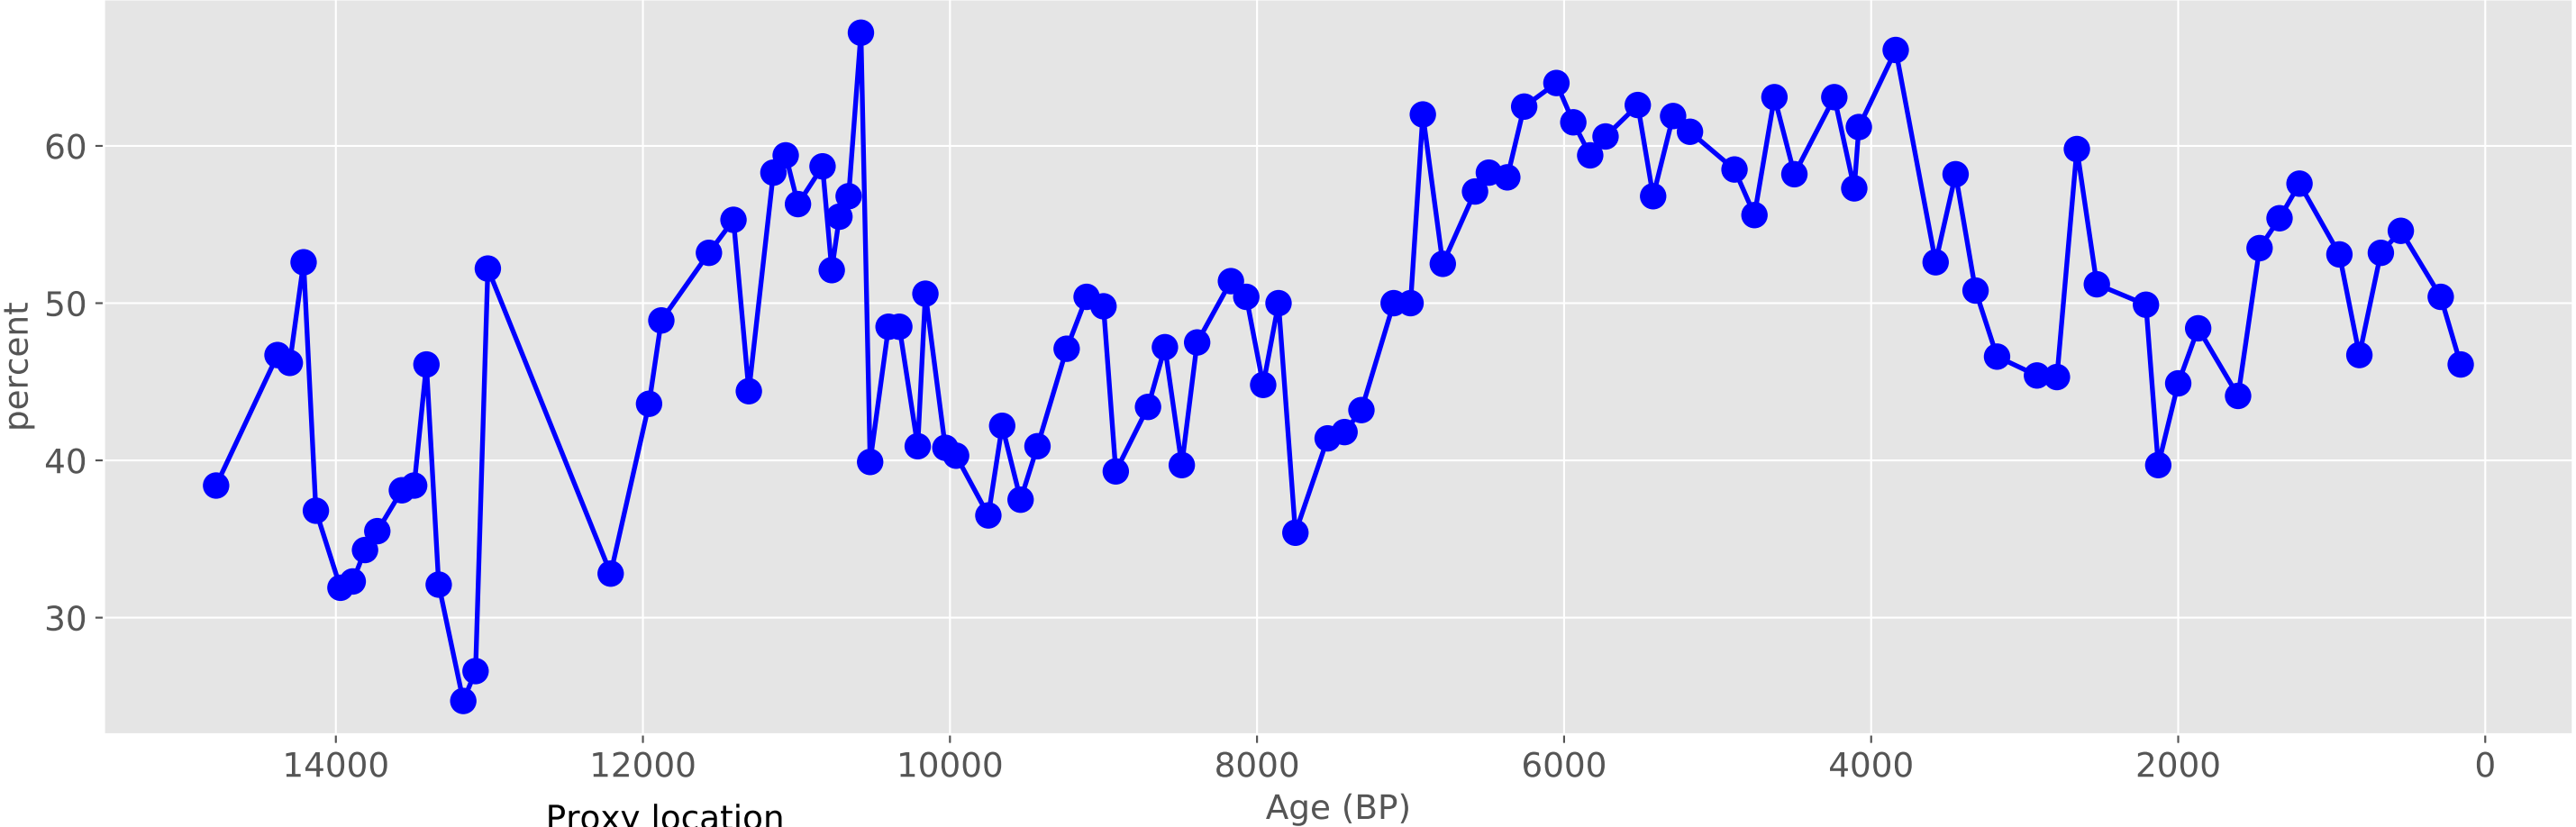

Proxy location  
(41.68 ° N, 124.93 ° W)

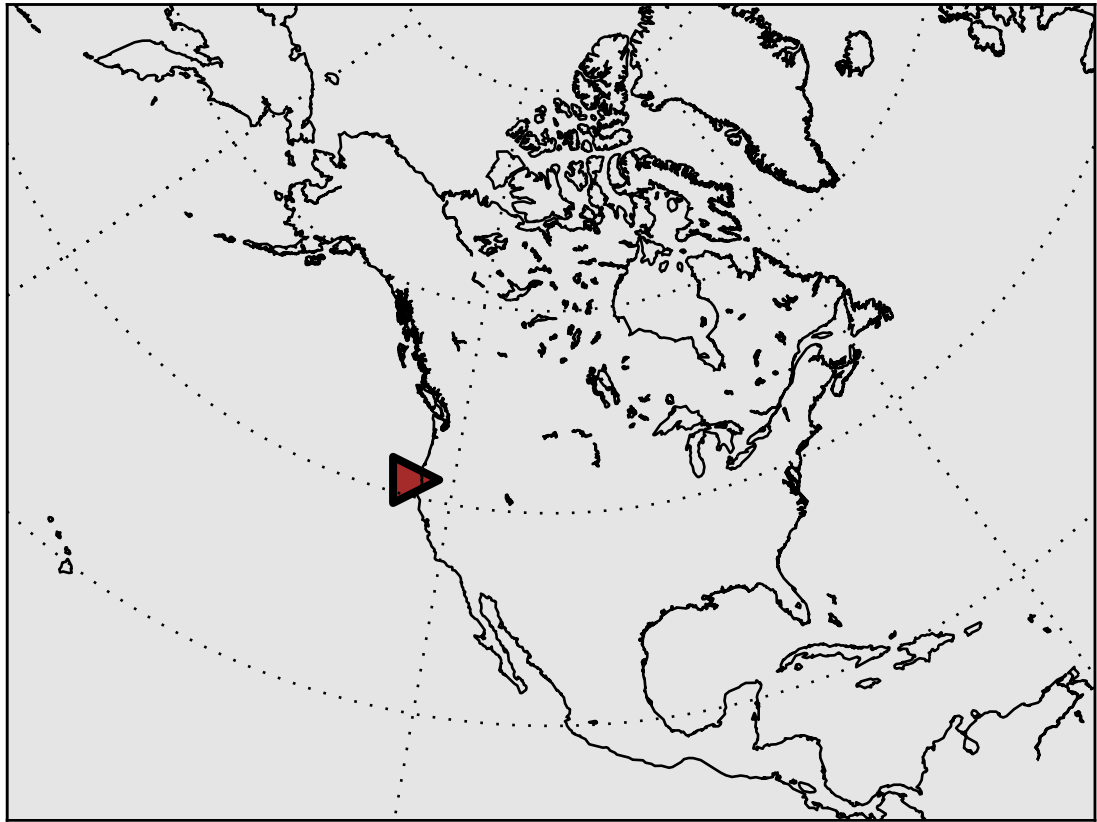

|                    |                                                       |
|--------------------|-------------------------------------------------------|
| Dataset name:      | ODP1019.Barron.2003                                   |
| Archive type:      | MarineSediment                                        |
| Proxy type:        | diatom                                                |
| Variable name:     | upwelling                                             |
| Latitude ( ° N):   | 41.682                                                |
| Longitude ( ° E):  | -124.93                                               |
| Elevation (m):     | -980.0                                                |
| Interp. variable:  | upwelling                                             |
| Interp. detail:    | upwelling@surface                                     |
| Interp. season:    | annual                                                |
| Interp. direction: | positive                                              |
| Pub. 1 title:      | High-resolution climatic evolution of coastal nort... |
| Pub. 1 authors:    | Barron, John A.;Heusser, Linda;Herbert, Timothy;Ly... |
| Pub. 1 year:       | 2003                                                  |
| Pub. 1 DOI:        | 10.1029/2002PA000768                                  |
| Original data URL: | www.ncdc.noaa.gov/paleo/study/5867                    |



Proxy data and metadata

MarineSediment | diatom | MD02-2499.Lopez.2018 | WEB33ffbfb3

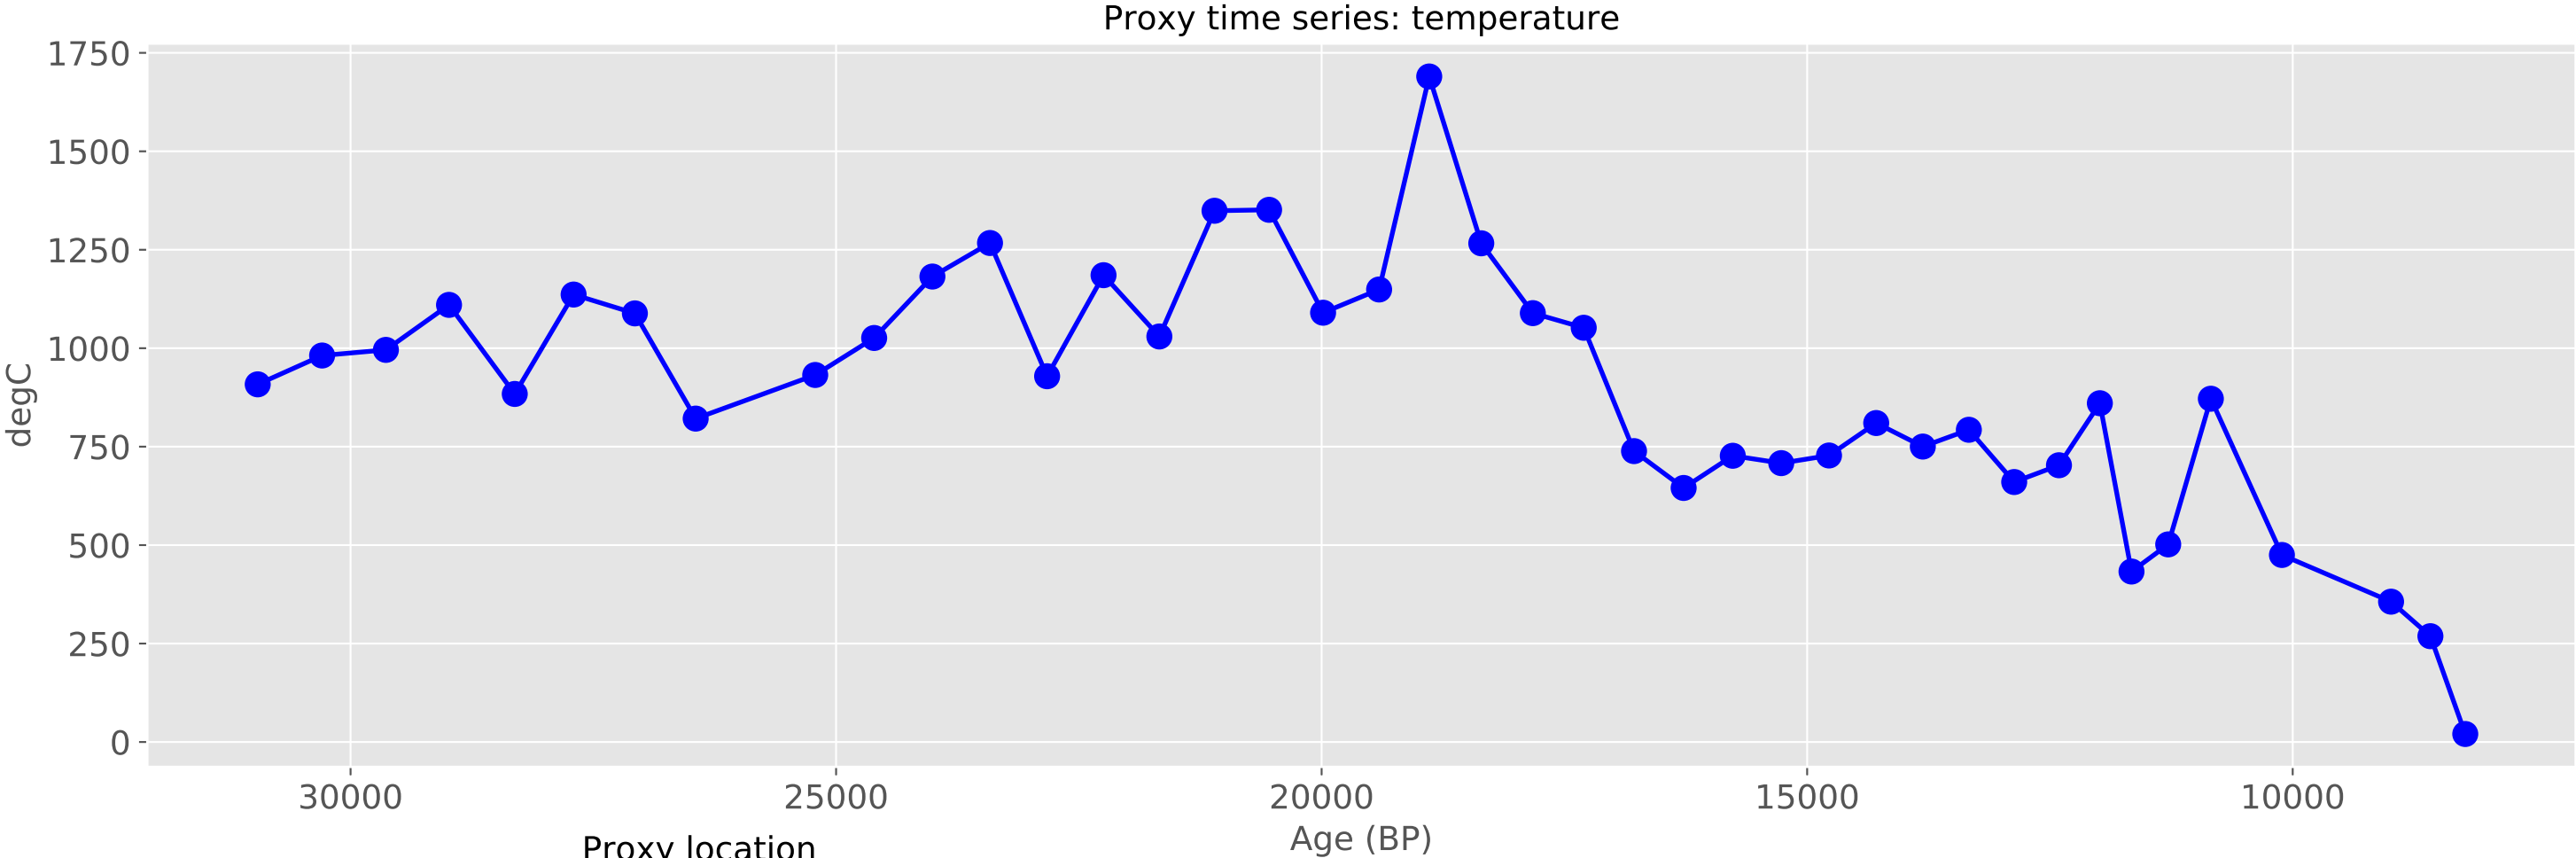

Proxy location  
(41.65 ° N, 124.94 ° W)

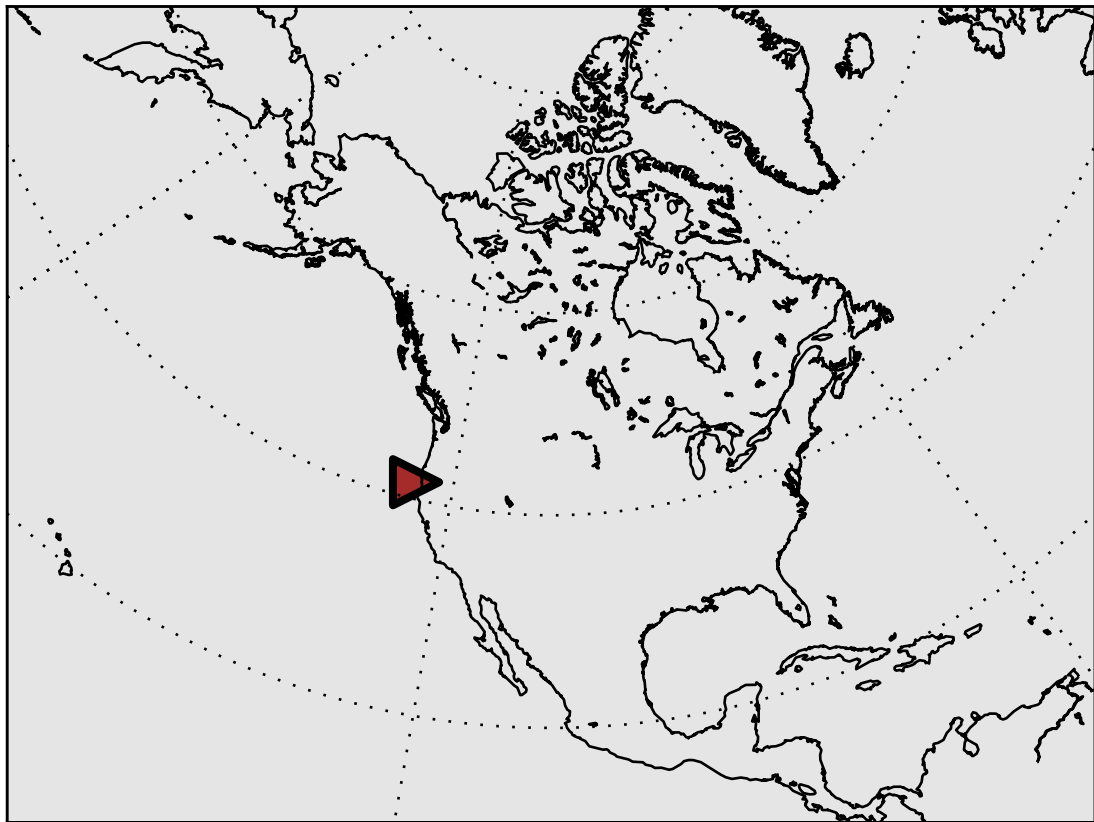

|                    |                                                                                              |
|--------------------|----------------------------------------------------------------------------------------------|
| Dataset name:      | MD02-2499.Lopez.2018                                                                         |
| Archive type:      | MarineSediment                                                                               |
| Proxy type:        | diatom                                                                                       |
| Variable name:     | temperature                                                                                  |
| Latitude ( ° N):   | 41.6517                                                                                      |
| Longitude ( ° E):  | -124.9375                                                                                    |
| Elevation (m):     | -905.0                                                                                       |
| Interp. variable:  | T                                                                                            |
| Interp. detail:    | sea@surface                                                                                  |
| Interp. season:    | summerOnly                                                                                   |
| Interp. direction: | positive                                                                                     |
| Pub. 1 title:      | North Pacific Paleotemperature and Paleoproductivi...                                        |
| Pub. 1 authors:    | Lopes, C.                                                                                    |
| Pub. 1 year:       | 2018                                                                                         |
| Pub. 1 DOI:        | 10.1029/2018PA003352                                                                         |
| Original data URL: | <a href="http://www.ncdc.noaa.gov/paleo/study/24150">www.ncdc.noaa.gov/paleo/study/24150</a> |

Proxy data and metadata  
MarineSediment | diatom | TN062-0550.Barron.2018 | WEB47918ab8

Proxy time series: upwelling

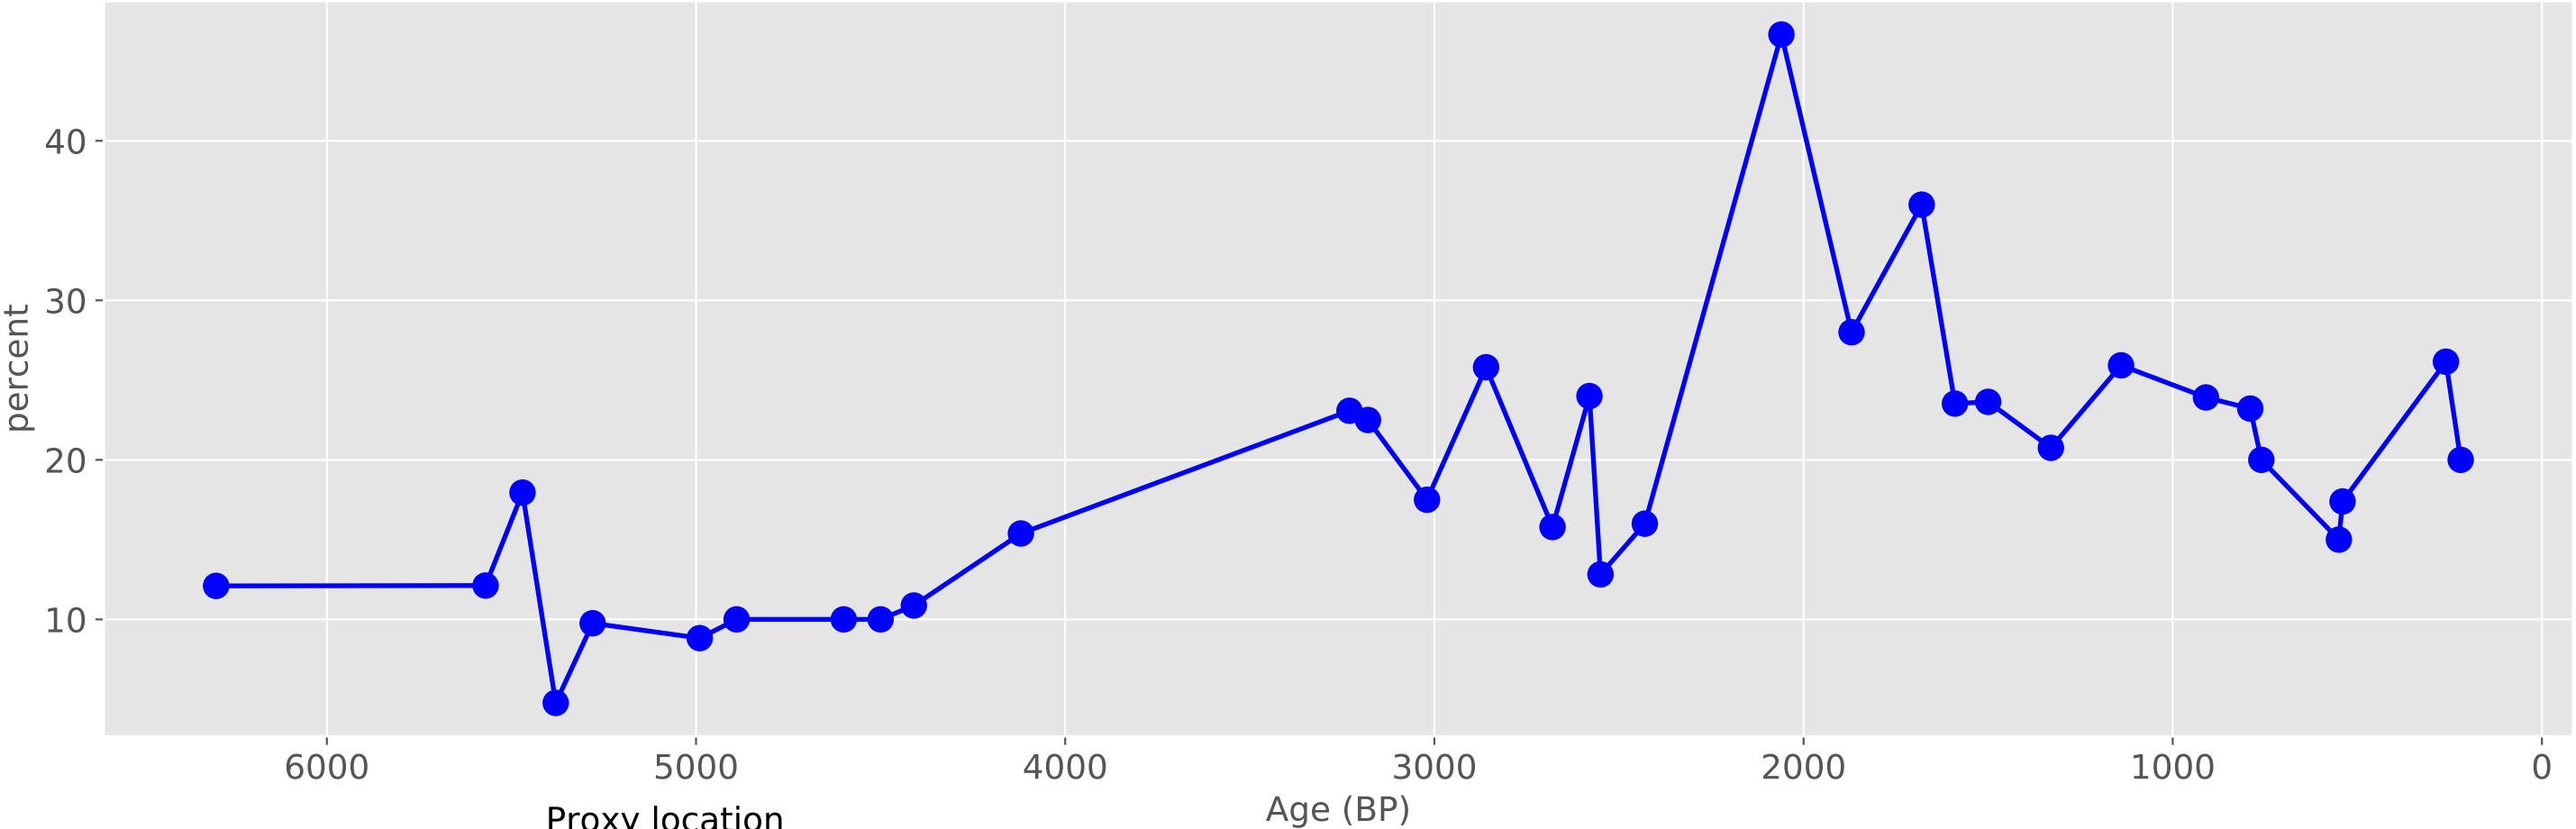

Proxy location  
(40.87 ° N, 124.57 ° W)

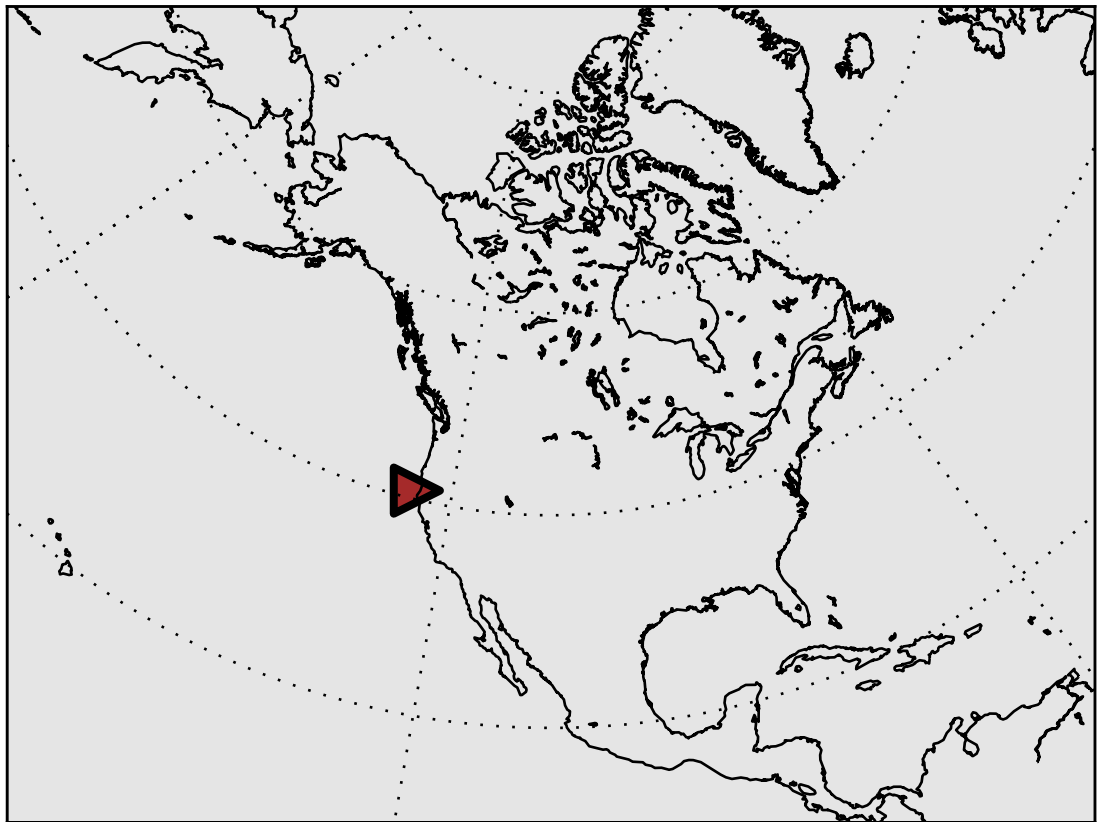

|                    |                                                       |
|--------------------|-------------------------------------------------------|
| Dataset name:      | TN062-0550.Barron.2018                                |
| Archive type:      | MarineSediment                                        |
| Proxy type:        | diatom                                                |
| Variable name:     | upwelling                                             |
| Latitude ( ° N):   | 40.8656                                               |
| Longitude ( ° E):  | -124.573                                              |
| Elevation (m):     | -569.0                                                |
| Interp. variable:  | upwelling                                             |
| Interp. detail:    | upwelling@surface                                     |
| Interp. season:    | summerOnly                                            |
| Interp. direction: | negative                                              |
| Pub. 1 title:      | High-resolution climate of the past _7300 years ...   |
| Pub. 1 authors:    | Barron, John A.; Bukry, David; Heusser, Linda E.; ... |
| Pub. 1 year:       | 2018                                                  |
| Pub. 1 DOI:        | 10.1016/j.quaint.2016.10.039                          |
| Original data URL: | www.ncdc.noaa.gov/paleo/study/27330                   |

Proxy data and metadata  
MarineSediment | diatom | TN062-0550.Barron.2018 | WEB773c247c

Proxy time series: upwelling

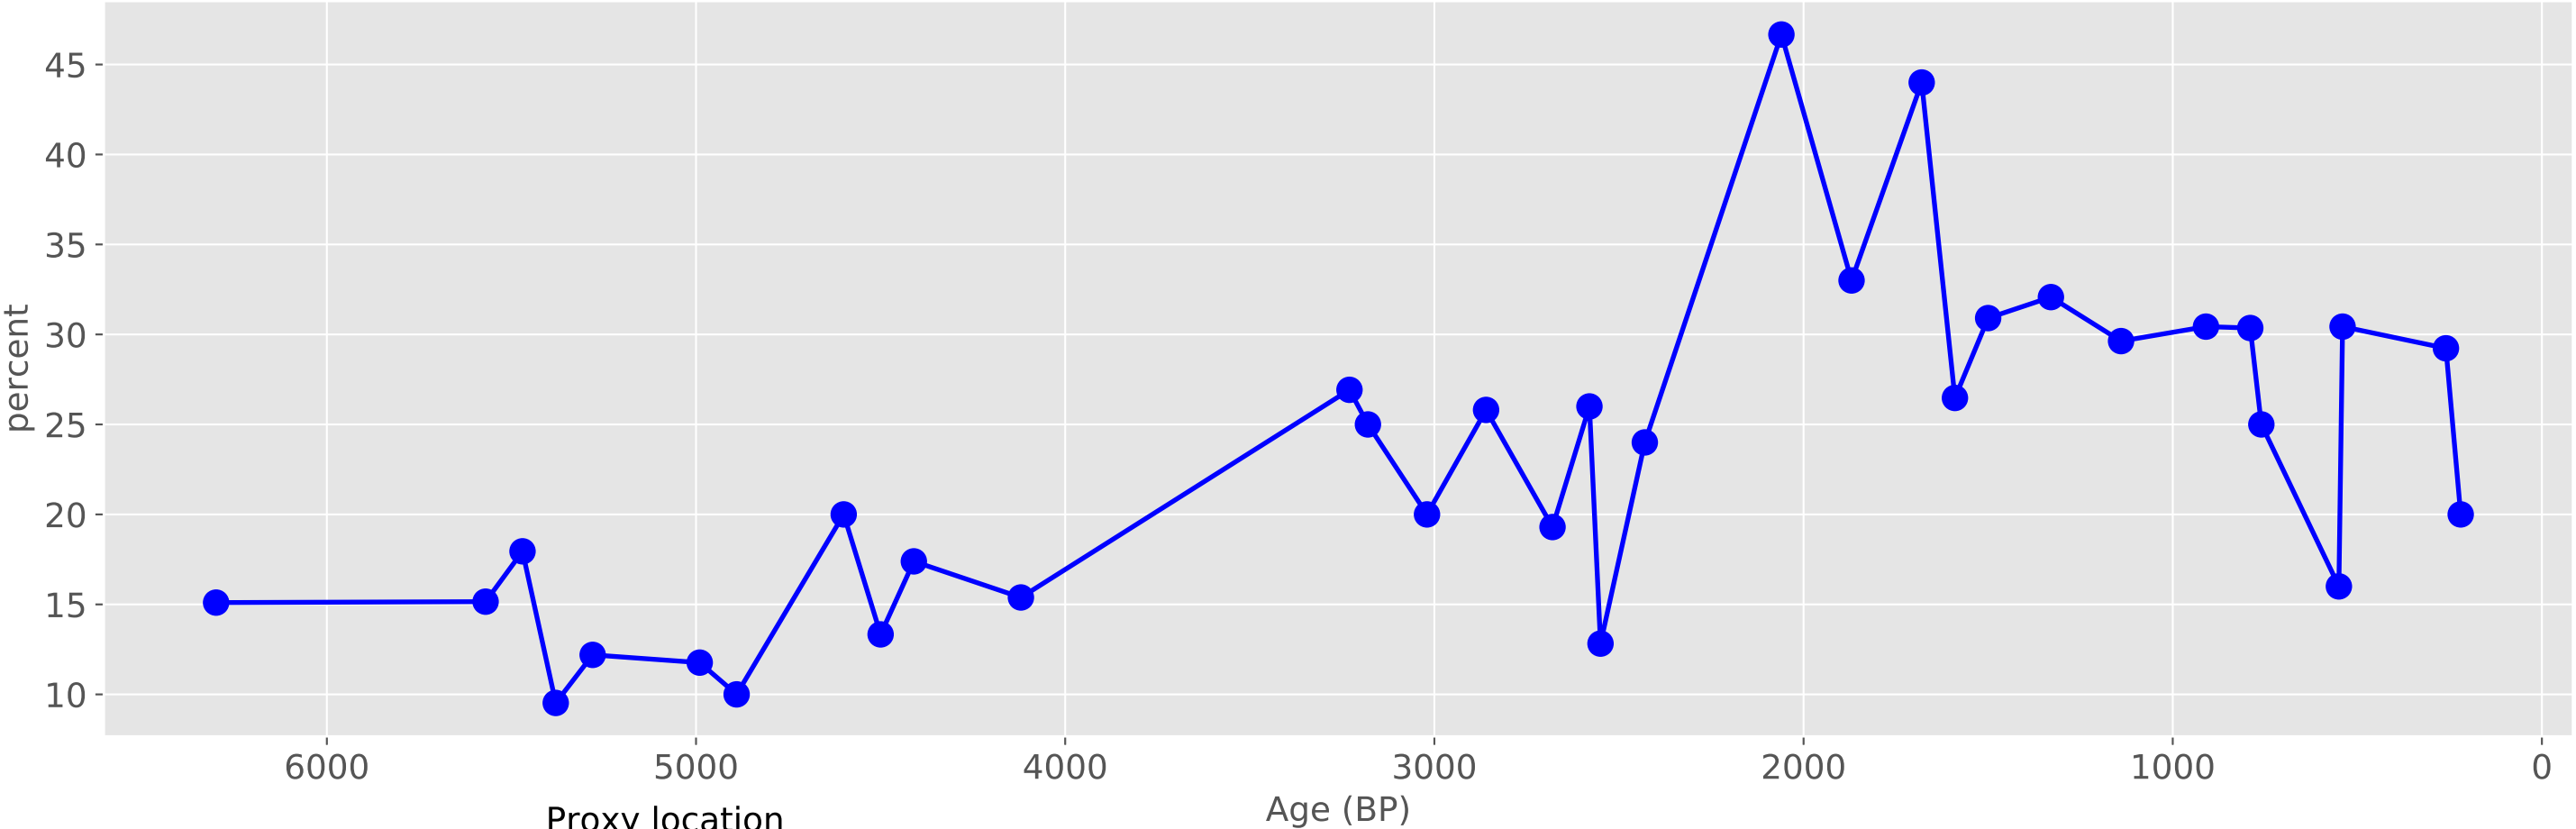

Proxy location  
(40.87 ° N, 124.57 ° W)

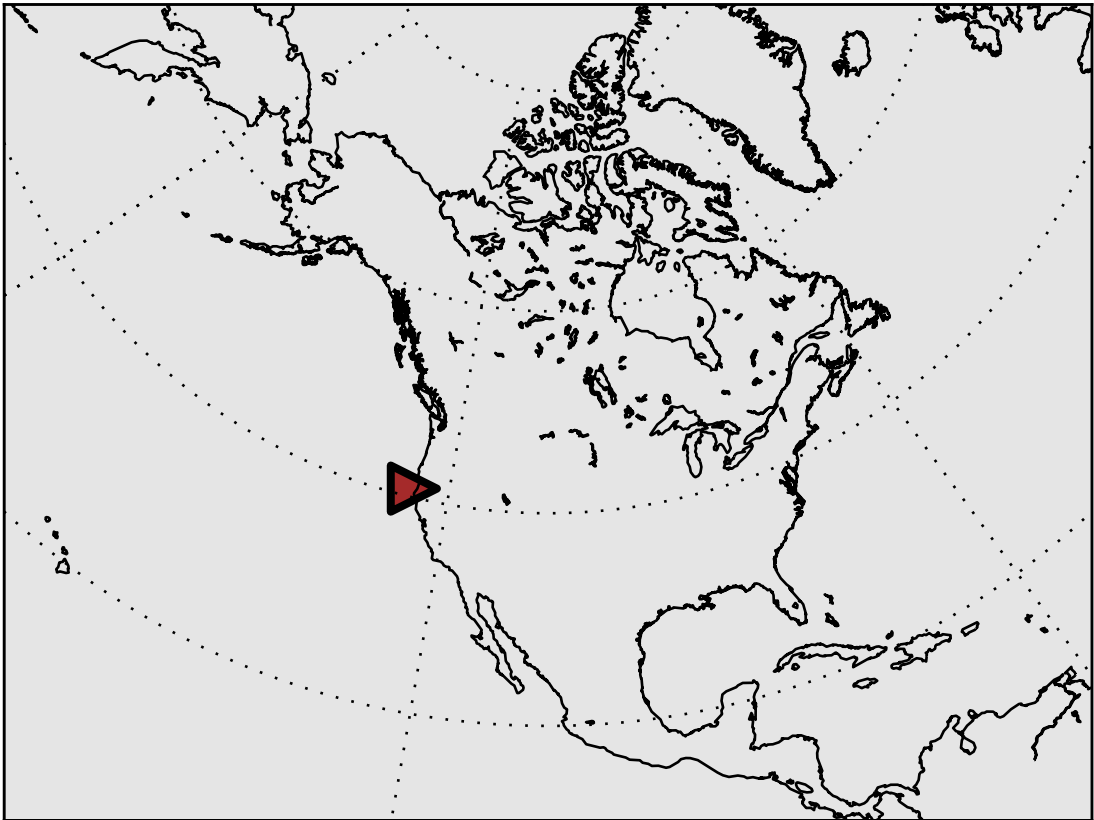

|                    |                                                       |
|--------------------|-------------------------------------------------------|
| Dataset name:      | TN062-0550.Barron.2018                                |
| Archive type:      | MarineSediment                                        |
| Proxy type:        | diatom                                                |
| Variable name:     | upwelling                                             |
| Latitude ( ° N):   | 40.8656                                               |
| Longitude ( ° E):  | -124.573                                              |
| Elevation (m):     | -569.0                                                |
| Interp. variable:  | upwelling                                             |
| Interp. detail:    | upwelling@surface                                     |
| Interp. season:    | summerOnly                                            |
| Interp. direction: | negative                                              |
| Pub. 1 title:      | High-resolution climate of the past _7300 years ...   |
| Pub. 1 authors:    | Barron, John A.; Bukry, David; Heusser, Linda E.; ... |
| Pub. 1 year:       | 2018                                                  |
| Pub. 1 DOI:        | 10.1016/j.quaint.2016.10.039                          |
| Original data URL: | www.ncdc.noaa.gov/paleo/study/27330                   |

Proxy data and metadata  
MarineSediment | diatom | TN062-0550.Barron.2018 | WEBd49b515b

Proxy time series: upwelling

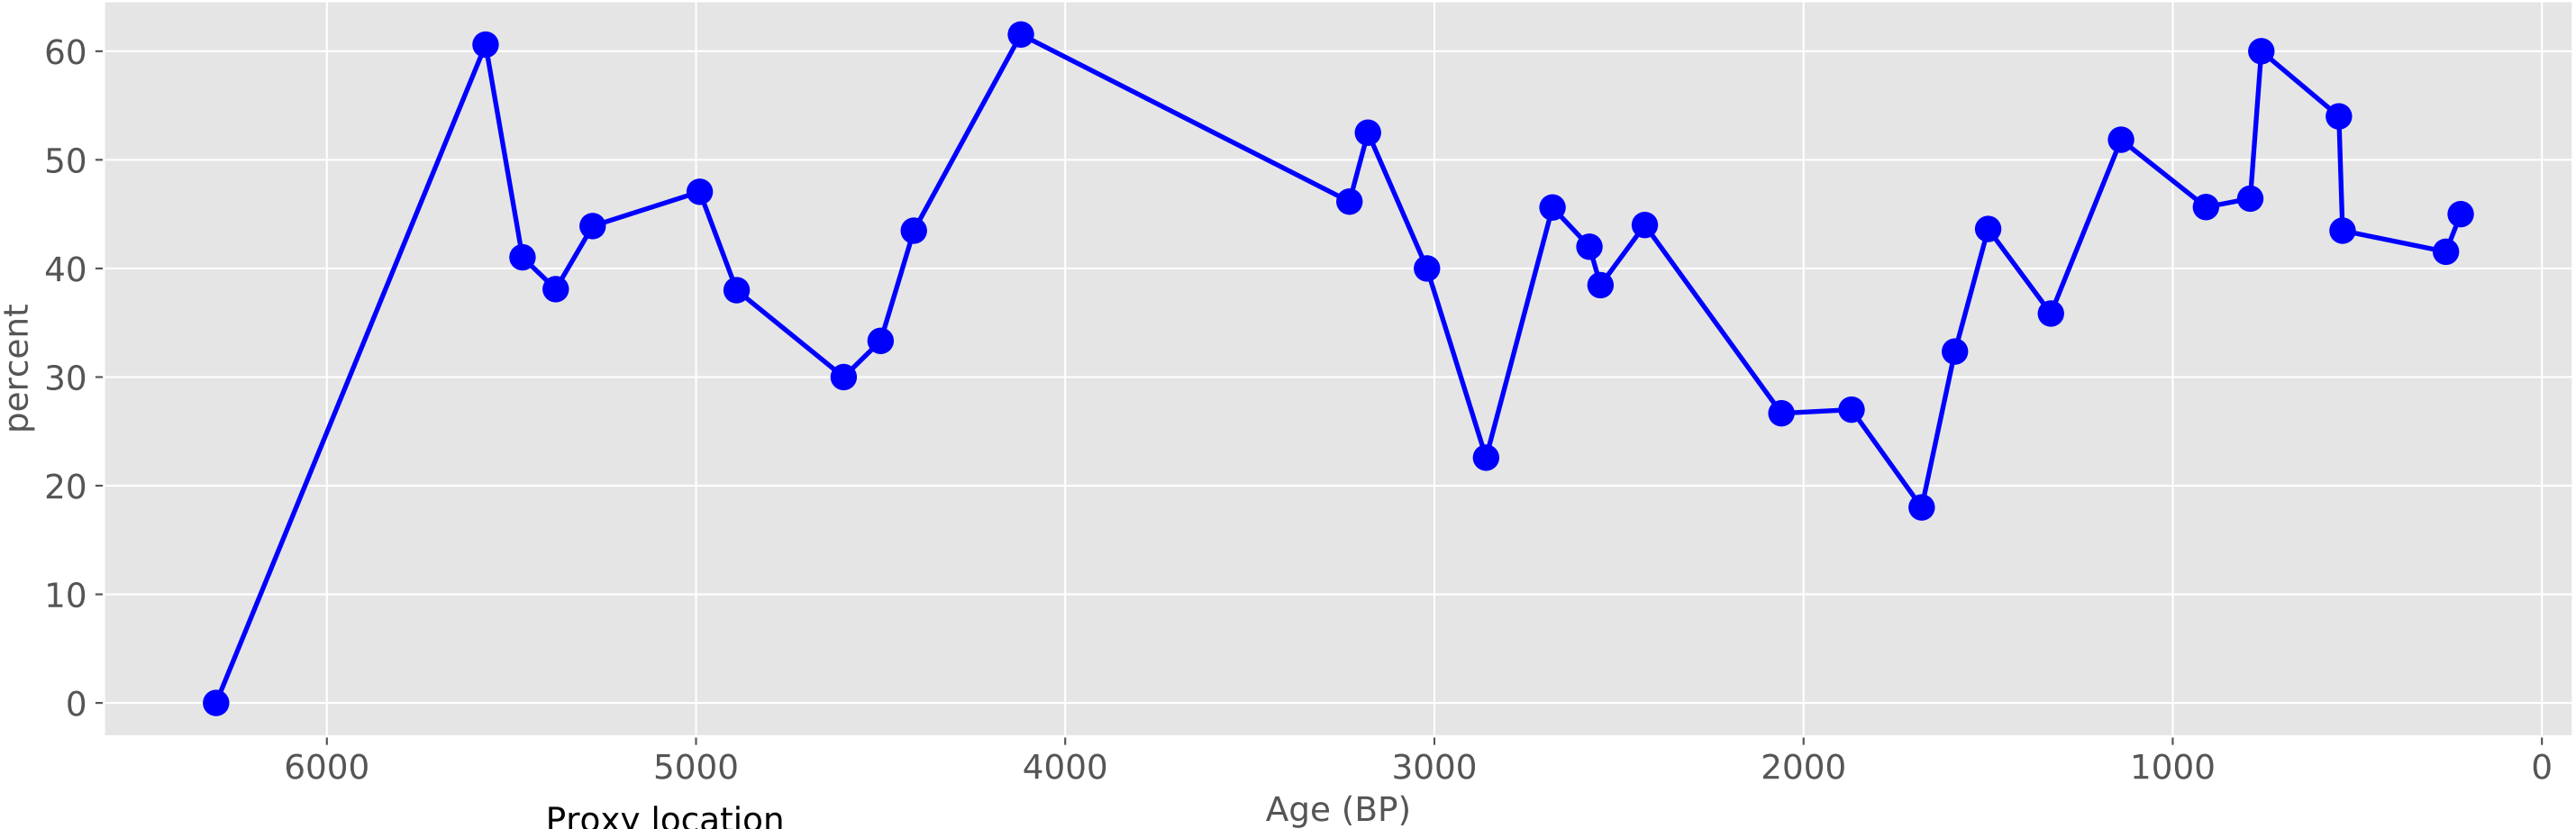

Proxy location  
(40.87 ° N, 124.57 ° W)



|                    |                                                                                              |
|--------------------|----------------------------------------------------------------------------------------------|
| Dataset name:      | TN062-0550.Barron.2018                                                                       |
| Archive type:      | MarineSediment                                                                               |
| Proxy type:        | diatom                                                                                       |
| Variable name:     | upwelling                                                                                    |
| Latitude ( ° N):   | 40.8656                                                                                      |
| Longitude ( ° E):  | -124.573                                                                                     |
| Elevation (m):     | -569.0                                                                                       |
| Interp. variable:  | upwelling                                                                                    |
| Interp. detail:    | upwelling@surface                                                                            |
| Interp. season:    | summerOnly                                                                                   |
| Interp. direction: | positive                                                                                     |
| Pub. 1 title:      | High-resolution climate of the past _7300 years ...                                          |
| Pub. 1 authors:    | Barron, John A.; Bukry, David; Heusser, Linda E.; ...                                        |
| Pub. 1 year:       | 2018                                                                                         |
| Pub. 1 DOI:        | 10.1016/j.quaint.2016.10.039                                                                 |
| Original data URL: | <a href="http://www.ncdc.noaa.gov/paleo/study/27330">www.ncdc.noaa.gov/paleo/study/27330</a> |

Proxy data and metadata

MarineSediment | diatom | TN062-0550.Barron.2018 | WEBfd6711c4

Proxy time series: upwelling

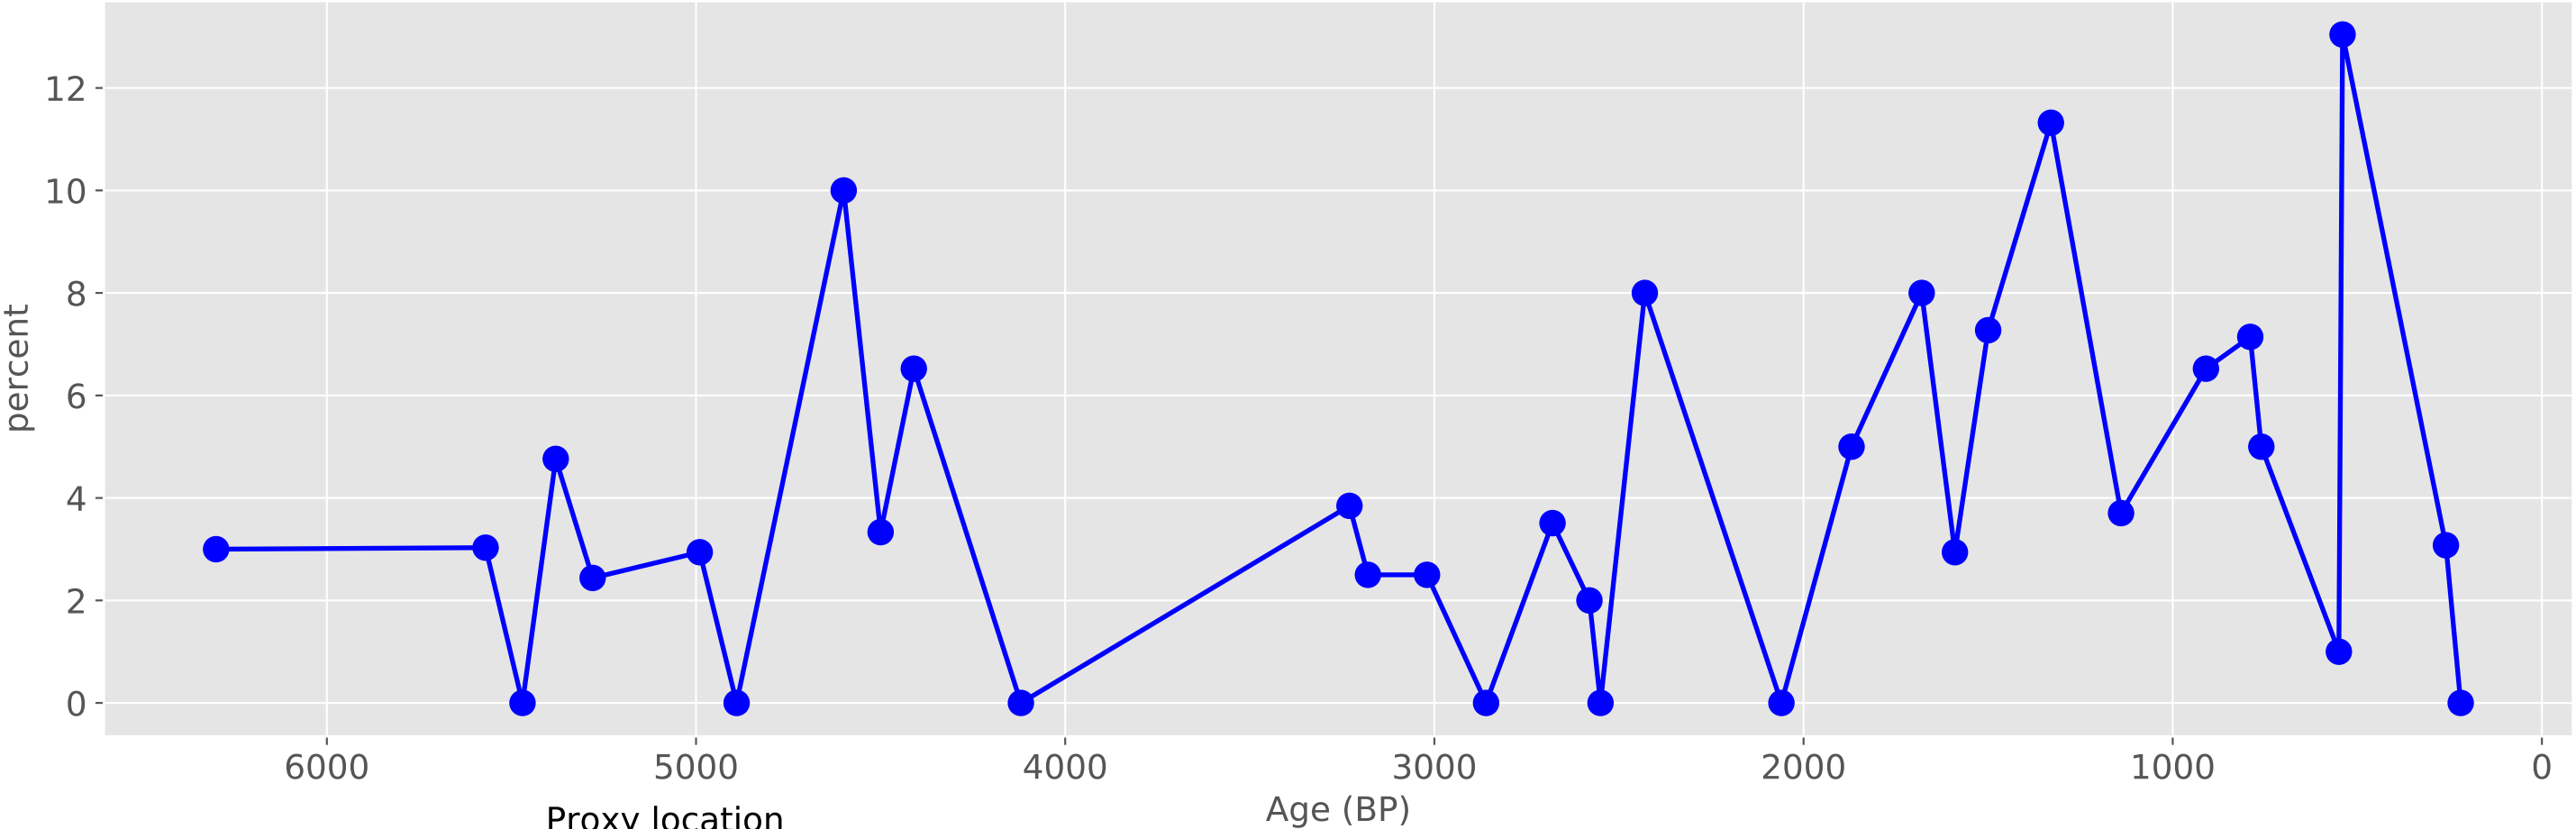

Proxy location  
(40.87 ° N, 124.57 ° W)



|                    |                                                       |
|--------------------|-------------------------------------------------------|
| Dataset name:      | TN062-0550.Barron.2018                                |
| Archive type:      | MarineSediment                                        |
| Proxy type:        | diatom                                                |
| Variable name:     | upwelling                                             |
| Latitude ( ° N):   | 40.8656                                               |
| Longitude ( ° E):  | -124.573                                              |
| Elevation (m):     | -569.0                                                |
| Interp. variable:  | upwelling                                             |
| Interp. detail:    | upwelling@surface                                     |
| Interp. season:    | summerOnly                                            |
| Interp. direction: | negative                                              |
| Pub. 1 title:      | High-resolution climate of the past _7300 years ...   |
| Pub. 1 authors:    | Barron, John A.; Bukry, David; Heusser, Linda E.; ... |
| Pub. 1 year:       | 2018                                                  |
| Pub. 1 DOI:        | 10.1016/j.quaint.2016.10.039                          |
| Original data URL: | www.ncdc.noaa.gov/paleo/study/27330                   |

Proxy data and metadata  
MarineSediment | diatom | DSDP480.Barron.2004 | LPD09a8f867

Proxy time series: Roperia\_tesselata

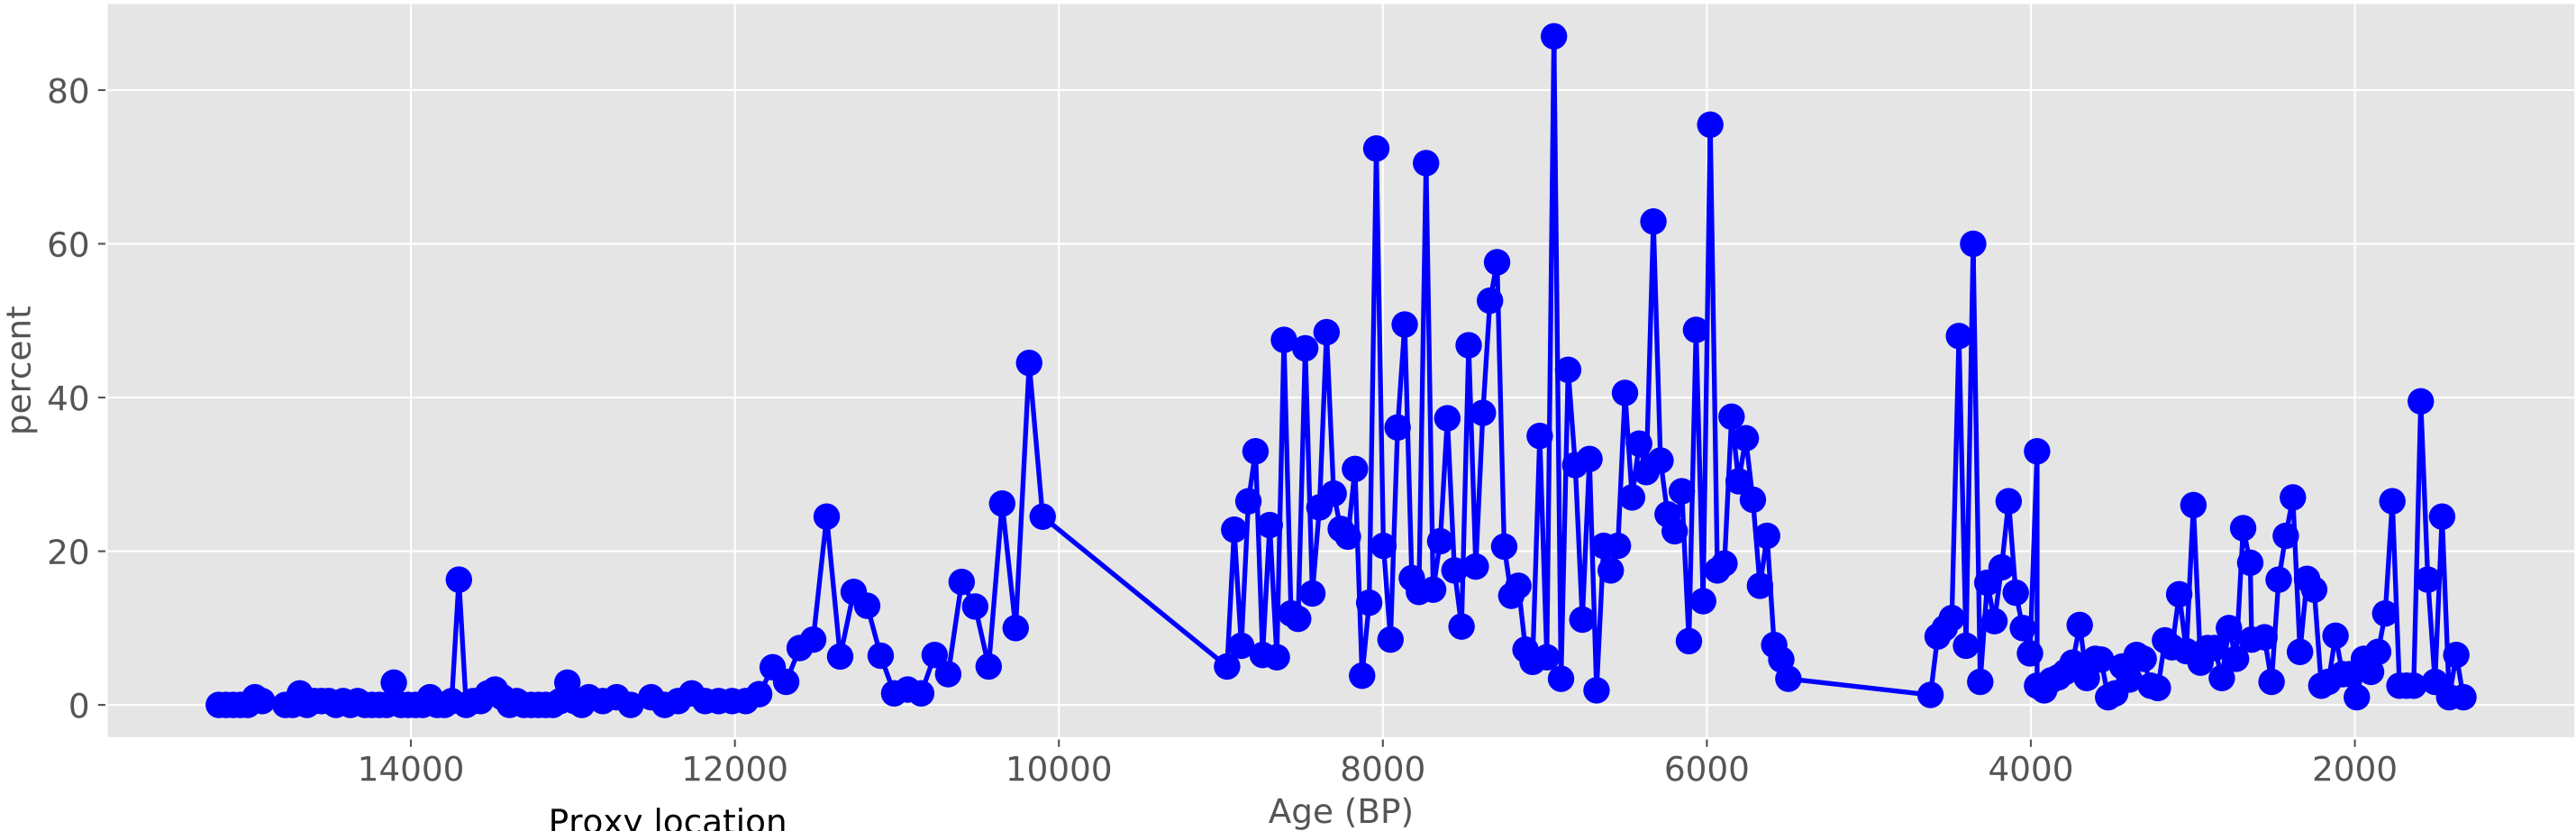

Proxy location  
(27.90 ° N, 111.65 ° W)

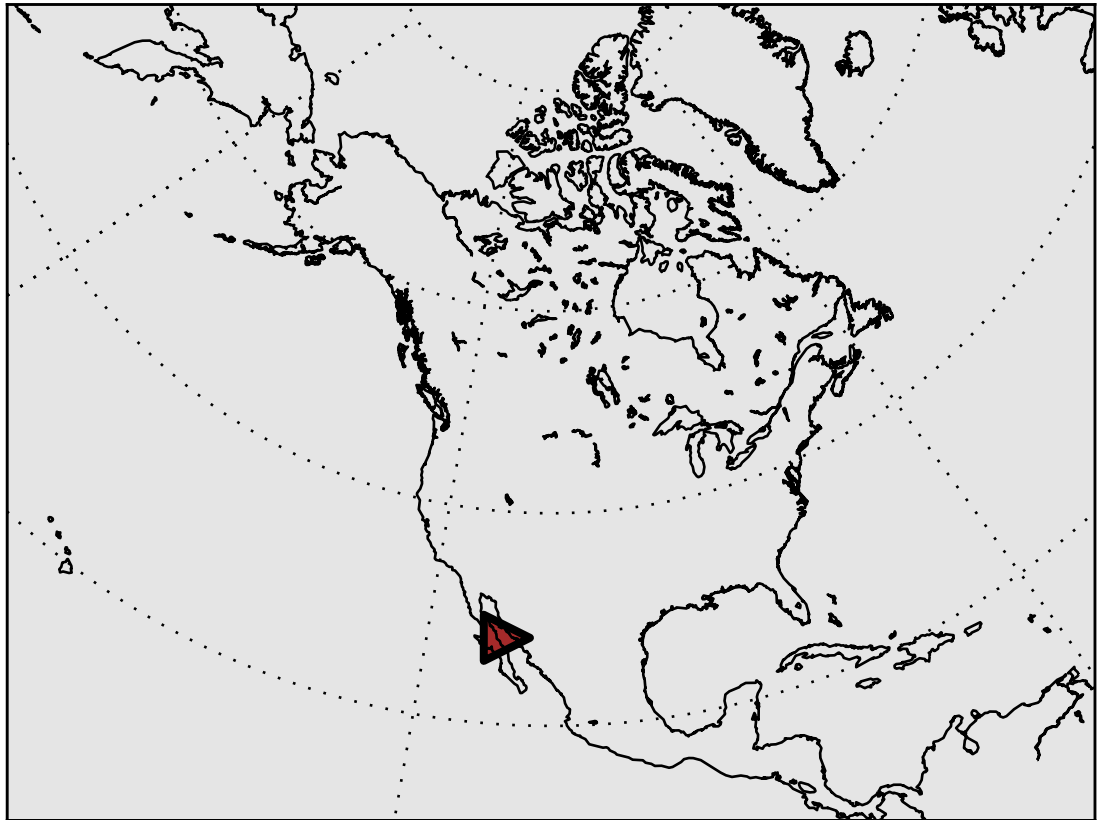

|                    |                                                                                            |
|--------------------|--------------------------------------------------------------------------------------------|
| Dataset name:      | DSDP480.Barron.2004                                                                        |
| Archive type:      | MarineSediment                                                                             |
| Proxy type:        | diatom                                                                                     |
| Variable name:     | Roperia_tesselata                                                                          |
| Latitude ( ° N):   | 27.9                                                                                       |
| Longitude ( ° E):  | -111.65                                                                                    |
| Elevation (m):     | -655.0                                                                                     |
| Interp. variable:  | upwelling                                                                                  |
| Interp. detail:    | @surface                                                                                   |
| Interp. season:    | winterOnly                                                                                 |
| Interp. direction: | positive                                                                                   |
| Pub. 1 title:      | High resolution paleoceanography of the Guaymas Ba...                                      |
| Pub. 1 authors:    | Barron, John A;Bukry, David;Bischoff, James L                                              |
| Pub. 1 year:       | 2004                                                                                       |
| Pub. 1 DOI:        | 10.1016/S0377-8398(03)00071-9                                                              |
| Original data URL: | <a href="http://www.ncdc.noaa.gov/paleo/study/5855">www.ncdc.noaa.gov/paleo/study/5855</a> |



Proxy data and metadata

MarineSediment | diatom | DSDP480.Barron.2004 | LPD2475c83d

Proxy time series: *Actinocyclus\_curvatulus*

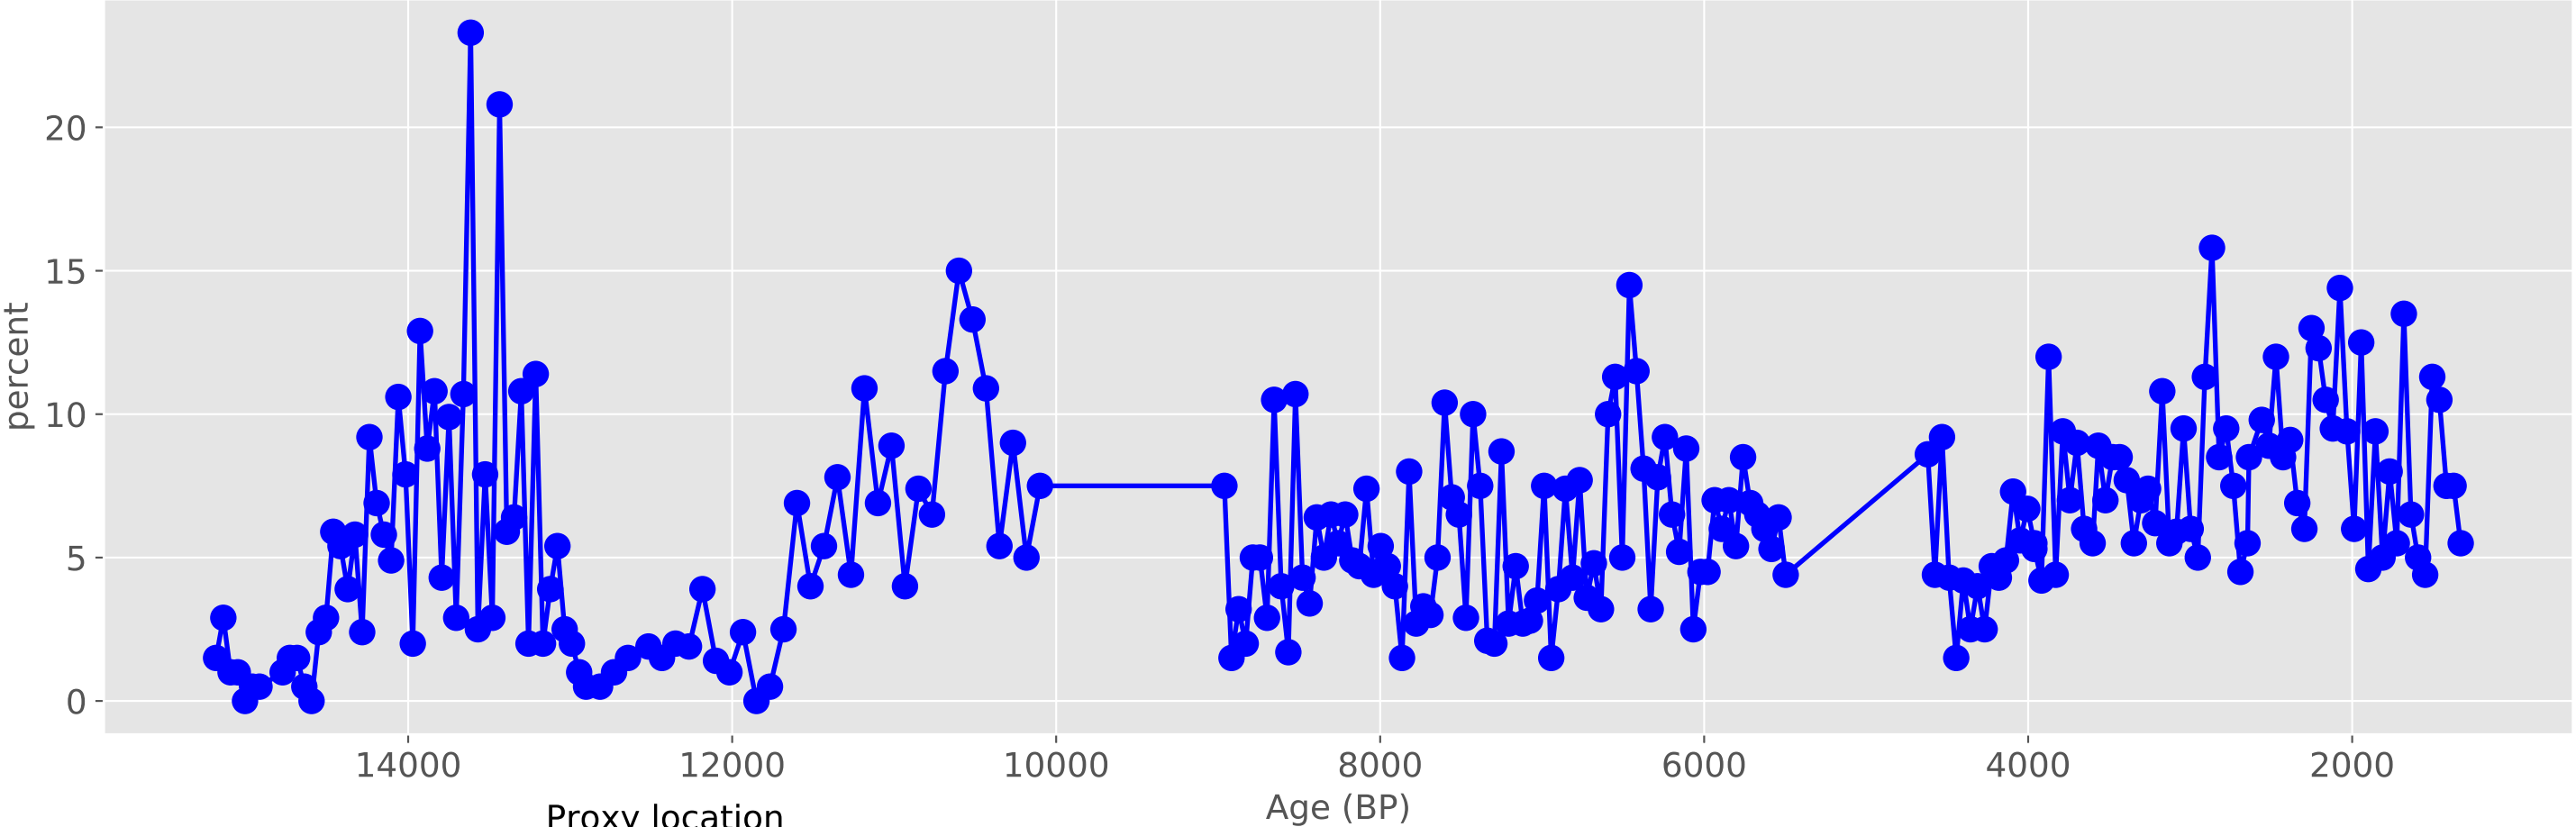

Proxy location  
(27.90 ° N, 111.65 ° W)

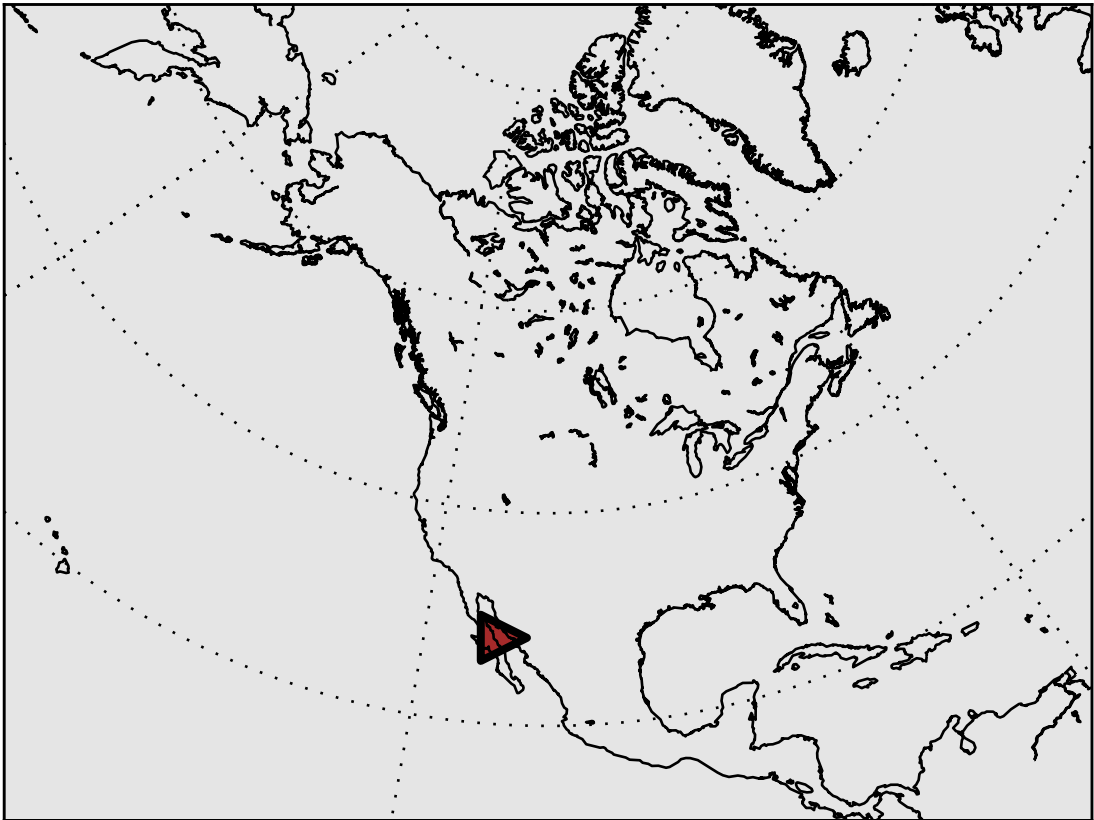

|                    |                                                       |
|--------------------|-------------------------------------------------------|
| Dataset name:      | DSDP480.Barron.2004                                   |
| Archive type:      | MarineSediment                                        |
| Proxy type:        | diatom                                                |
| Variable name:     | Actinocyclus_curvatulus                               |
| Latitude ( ° N):   | 27.9                                                  |
| Longitude ( ° E):  | -111.65                                               |
| Elevation (m):     | -655.0                                                |
| Interp. variable:  | upwelling                                             |
| Interp. detail:    | upwelling@surface                                     |
| Interp. season:    | winterOnly                                            |
| Interp. direction: | positive                                              |
| Pub. 1 title:      | High resolution paleoceanography of the Guaymas Ba... |
| Pub. 1 authors:    | Barron, John A;Bukry, David;Bischoff, James L         |
| Pub. 1 year:       | 2004                                                  |
| Pub. 1 DOI:        | 10.1016/S0377-8398(03)00071-9                         |
| Original data URL: | www.ncdc.noaa.gov/paleo/study/5855                    |

Proxy data and metadata

MarineSediment | diatom | DSDP480.Barron.2004 | LPDee4b6a0d

Proxy time series: Octactis\_pulchra\_(lrg)

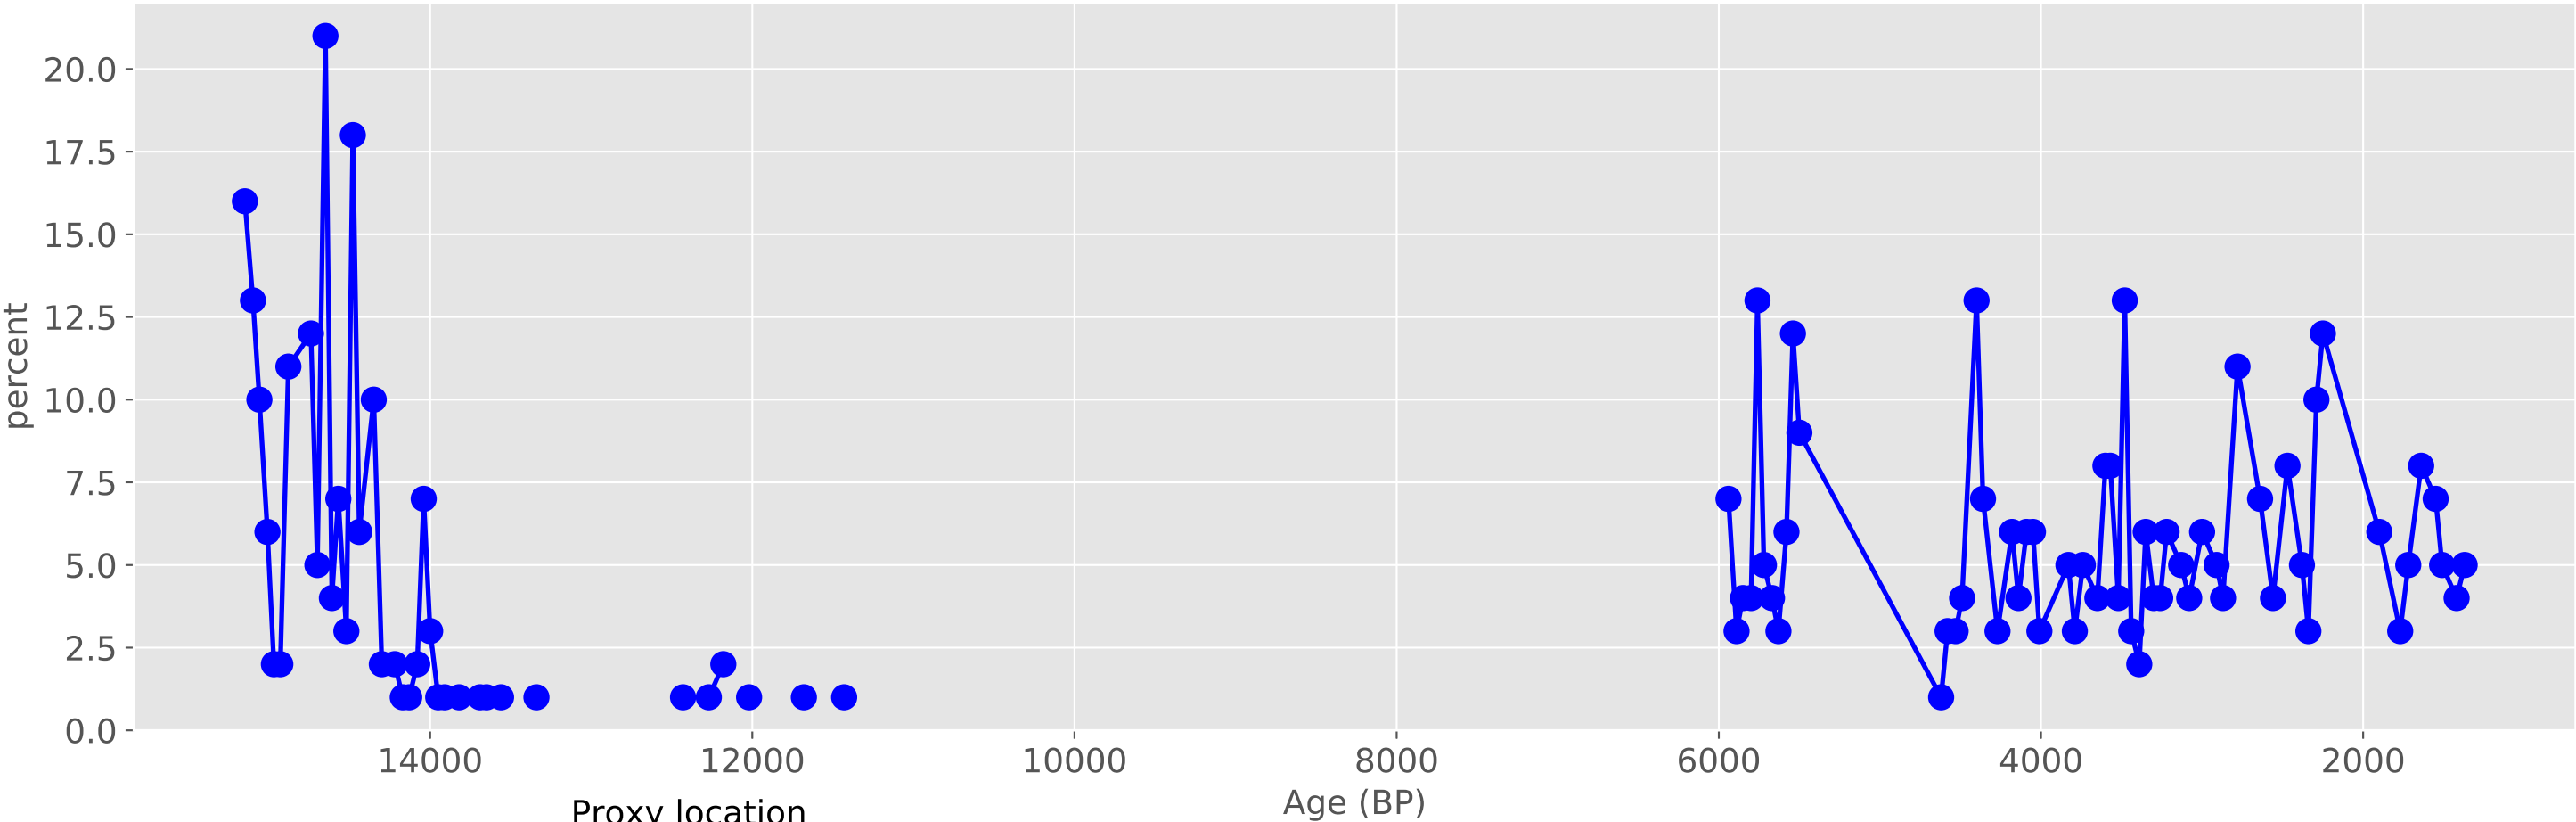

Proxy location  
(27.90 ° N, 111.65 ° W)

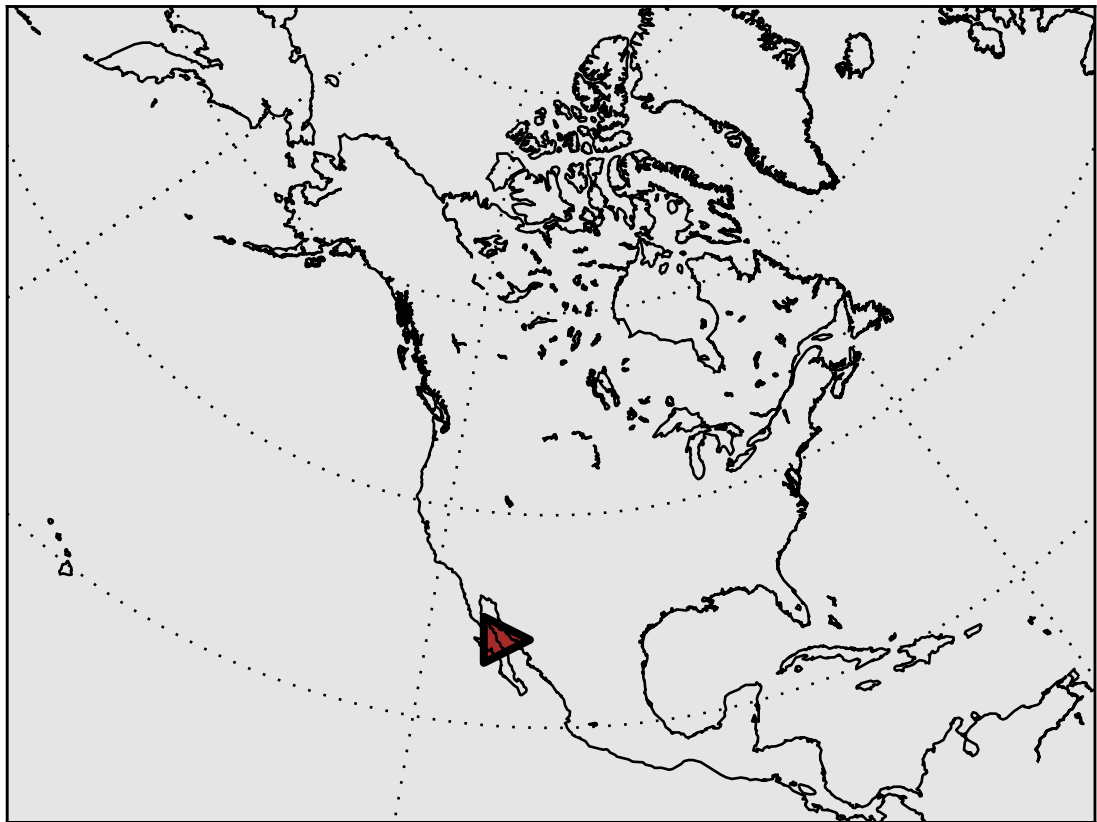

|                    |                                                       |
|--------------------|-------------------------------------------------------|
| Dataset name:      | DSDP480.Barron.2004                                   |
| Archive type:      | MarineSediment                                        |
| Proxy type:        | diatom                                                |
| Variable name:     | Octactis_pulchra_(lrg)                                |
| Latitude ( ° N):   | 27.9                                                  |
| Longitude ( ° E):  | -111.65                                               |
| Elevation (m):     | -655.0                                                |
| Interp. variable:  | upwelling                                             |
| Interp. detail:    | @surface                                              |
| Interp. season:    | winterOnly                                            |
| Interp. direction: | positive                                              |
| Pub. 1 title:      | High resolution paleoceanography of the Guaymas Ba... |
| Pub. 1 authors:    | Barron, John A;Bukry, David;Bischoff, James L         |
| Pub. 1 year:       | 2004                                                  |
| Pub. 1 DOI:        | 10.1016/S0377-8398(03)00071-9                         |
| Original data URL: | www.ncdc.noaa.gov/paleo/study/5855                    |

Proxy data and metadata  
MarineSediment | diatom | DSDP480.Barron.2004 | LPDee5ae93d

Proxy time series: Azpeitia\_nodulifer

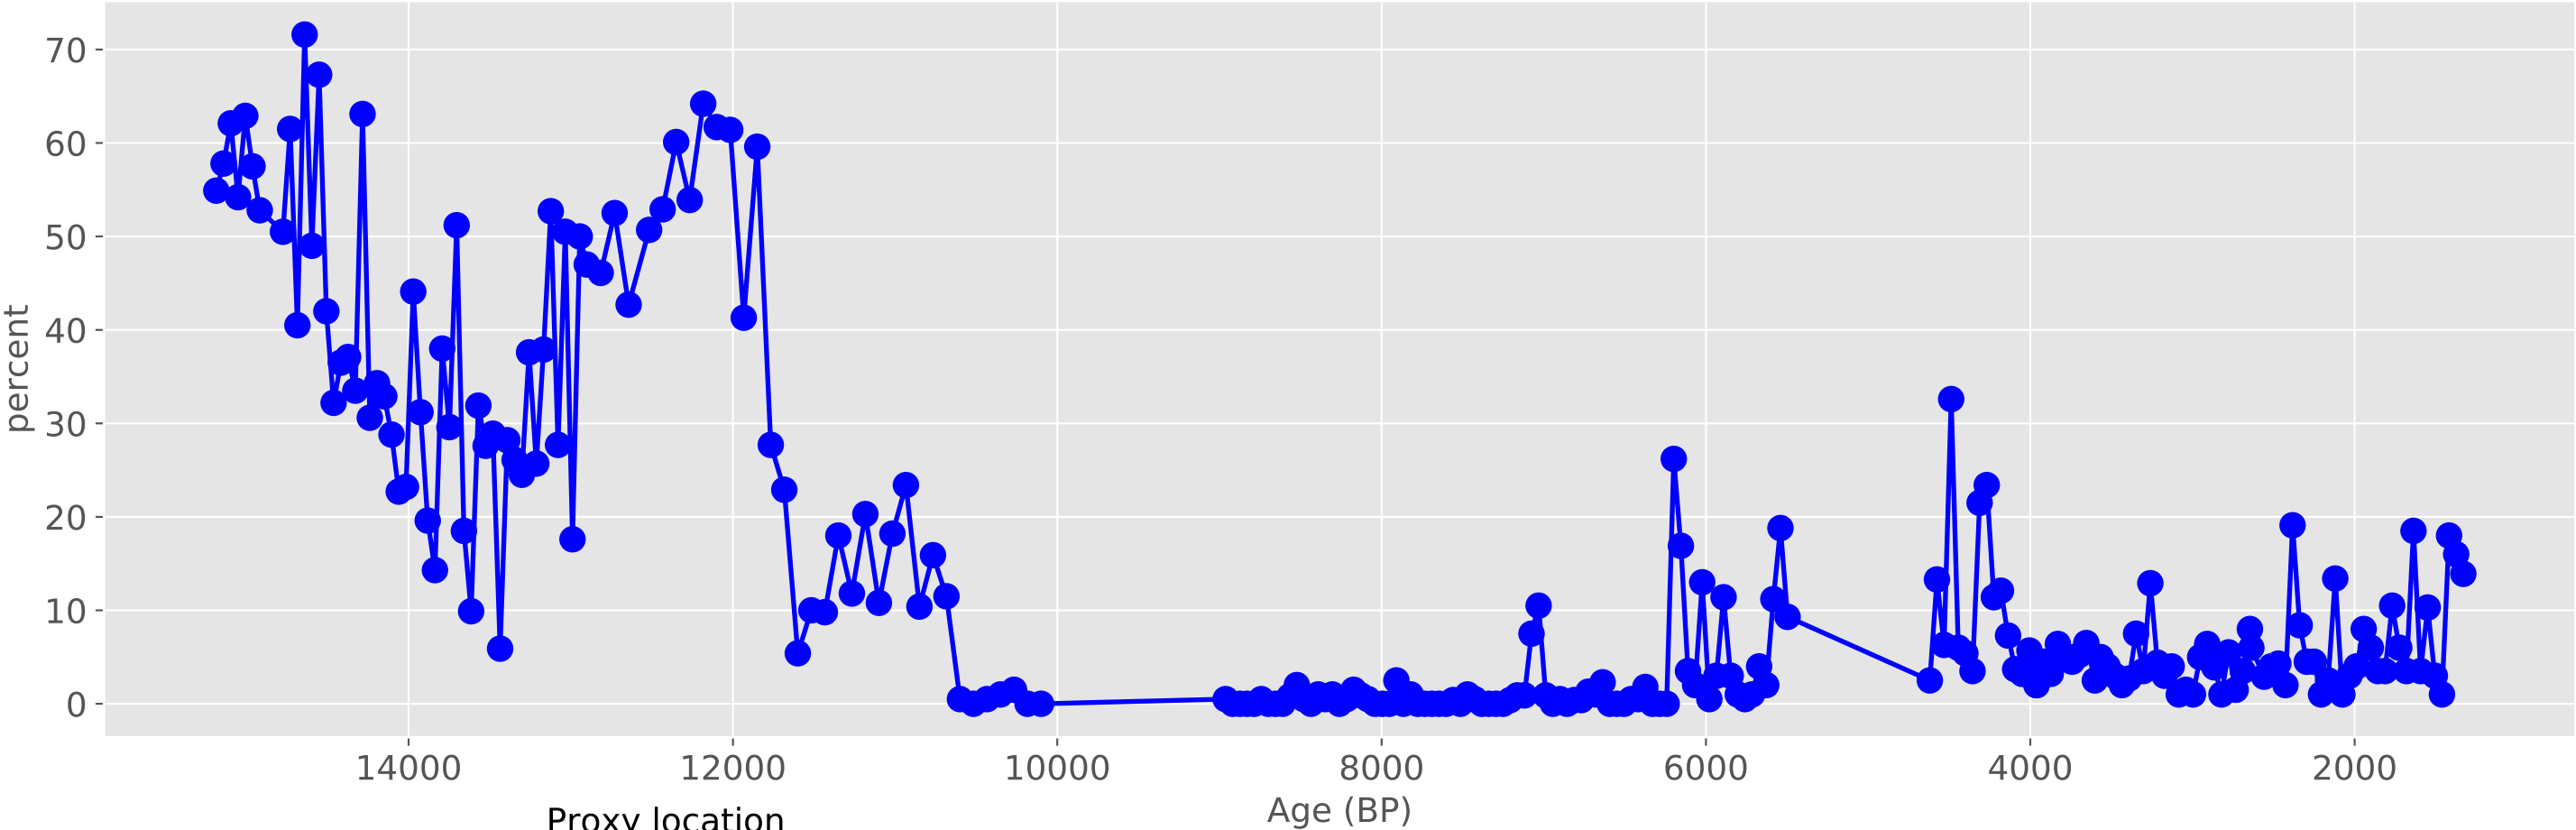

Proxy location  
(27.90 ° N, 111.65 ° W)



|                    |                                                       |
|--------------------|-------------------------------------------------------|
| Dataset name:      | DSDP480.Barron.2004                                   |
| Archive type:      | MarineSediment                                        |
| Proxy type:        | diatom                                                |
| Variable name:     | Azpeitia_nodulifer                                    |
| Latitude ( ° N):   | 27.9                                                  |
| Longitude ( ° E):  | -111.65                                               |
| Elevation (m):     | -655.0                                                |
| Interp. variable:  | MODE                                                  |
| Interp. detail:    | elNino                                                |
| Interp. season:    | annual                                                |
| Interp. direction: | positive                                              |
| Pub. 1 title:      | High resolution paleoceanography of the Guaymas Ba... |
| Pub. 1 authors:    | Barron, John A;Bukry, David;Bischoff, James L         |
| Pub. 1 year:       | 2004                                                  |
| Pub. 1 DOI:        | 10.1016/S0377-8398(03)00071-9                         |
| Original data URL: | www.ncdc.noaa.gov/paleo/study/5855                    |

Proxy data and metadata  
MarineSediment | diatom | GGC55\_JPC56.Barron.2005 | WEBebbc9f4c

Proxy time series: Actinocyclus\_curvatulus

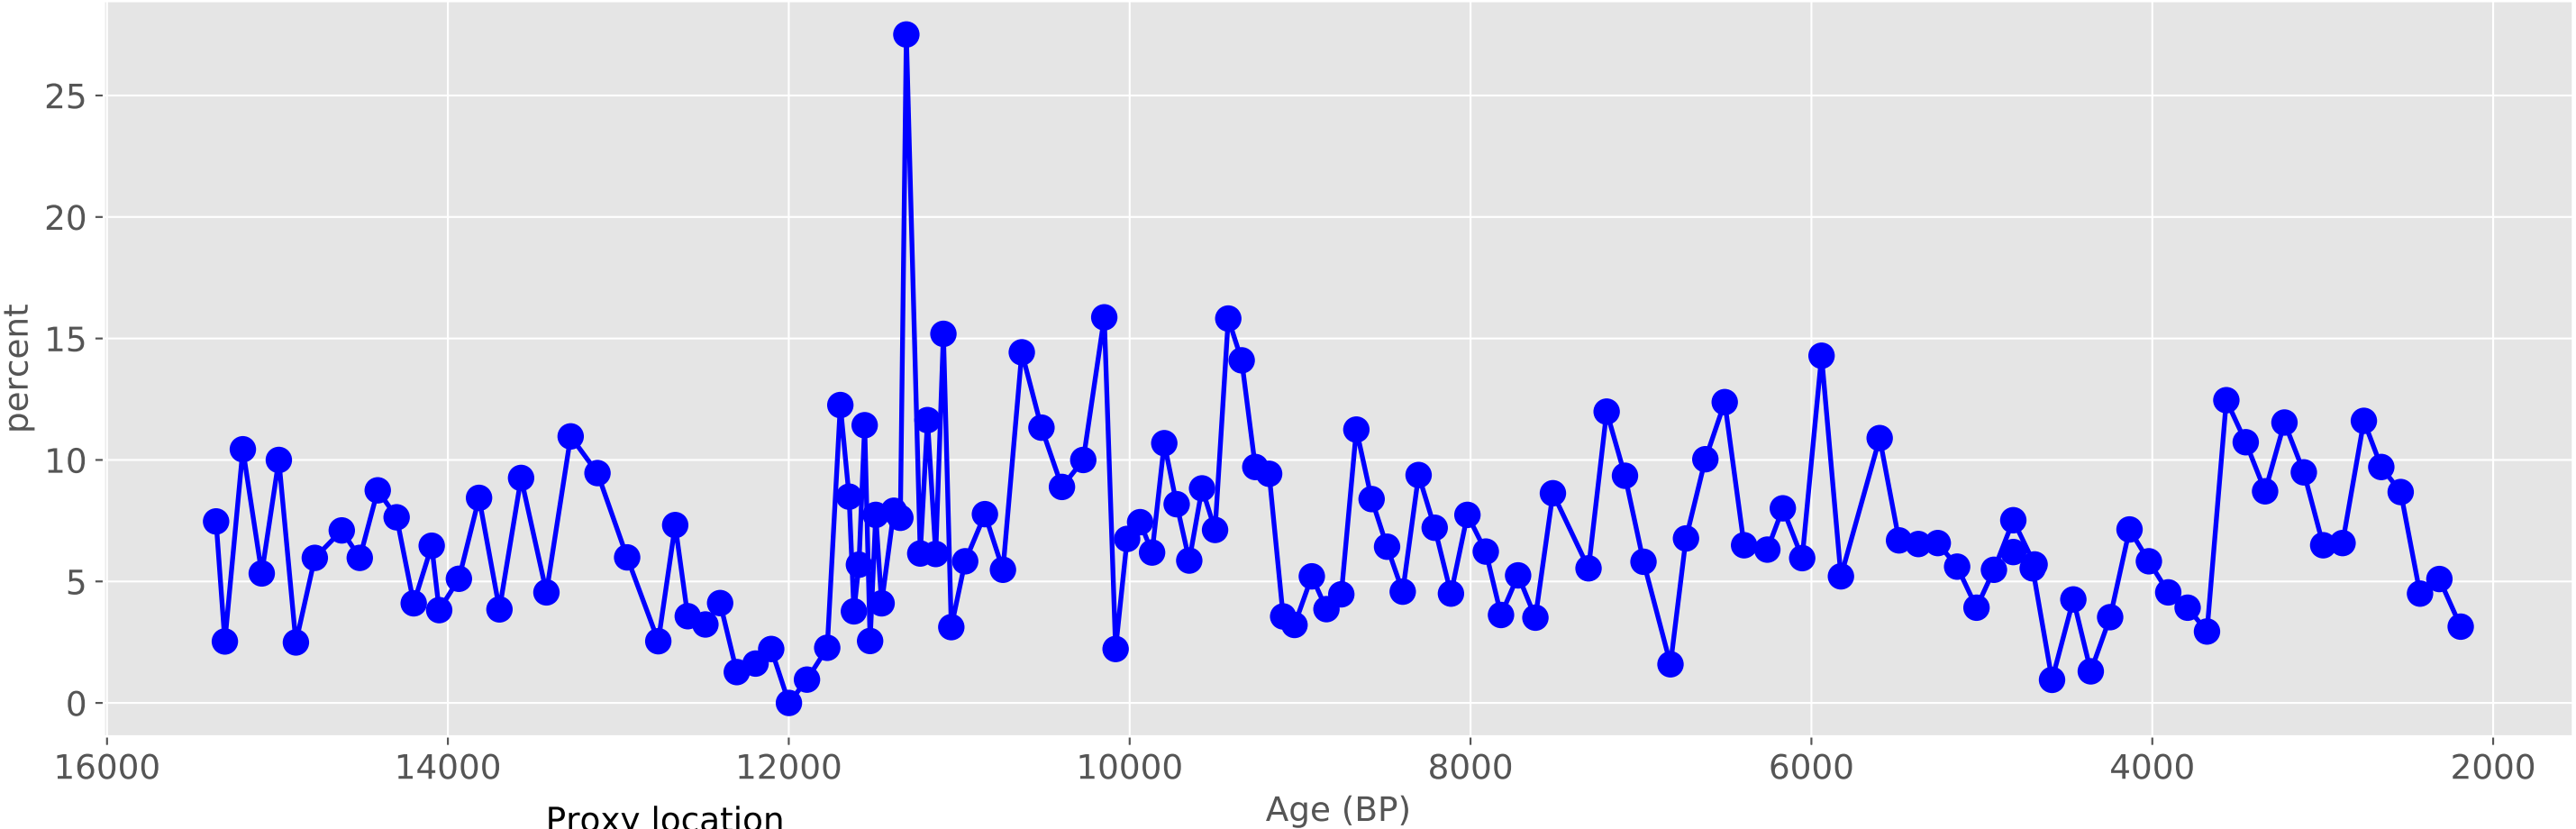

Proxy location  
(27.47° N, 112.10° W)

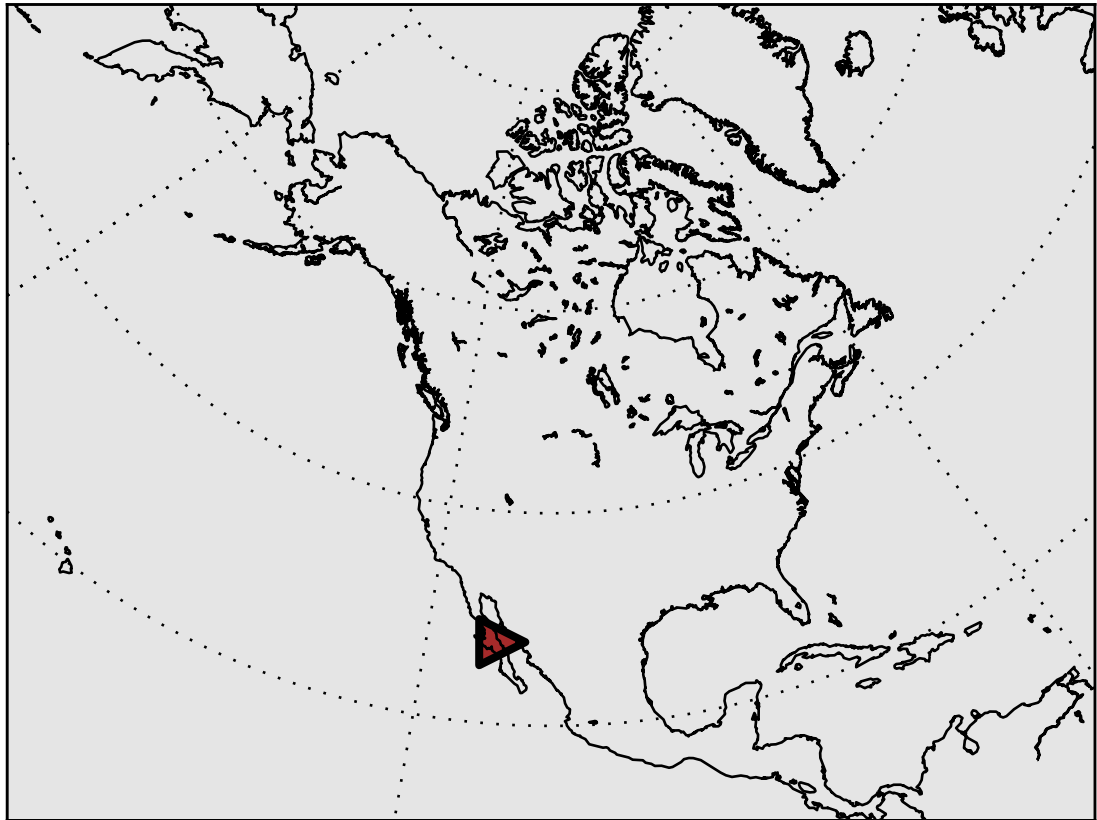

|                    |                                                                                            |
|--------------------|--------------------------------------------------------------------------------------------|
| Dataset name:      | GGC55_JPC56.Barron.2005                                                                    |
| Archive type:      | MarineSediment                                                                             |
| Proxy type:        | diatom                                                                                     |
| Variable name:     | Actinocyclus_curvatulus                                                                    |
| Latitude (° N):    | 27.47                                                                                      |
| Longitude (° E):   | -112.1                                                                                     |
| Elevation (m):     | -820.0                                                                                     |
| Interp. variable:  | upwelling                                                                                  |
| Interp. detail:    | sea@surface                                                                                |
| Interp. season:    | winterOnly                                                                                 |
| Interp. direction: | negative                                                                                   |
| Pub. 1 title:      | Paleoceanographic history of the Guaymas Basin, Gu...                                      |
| Pub. 1 authors:    | Barron, John A.                                                                            |
| Pub. 1 year:       | 2005                                                                                       |
| Pub. 1 DOI:        | 10.1016/j.marmicro.2005.04.001                                                             |
| Original data URL: | <a href="http://www.ncdc.noaa.gov/paleo/study/5915">www.ncdc.noaa.gov/paleo/study/5915</a> |

Proxy data and metadata

MarineSediment | dinocyst | P1B3.deVernal.2005 | PYT40VBXBG5

Proxy time series: temperature

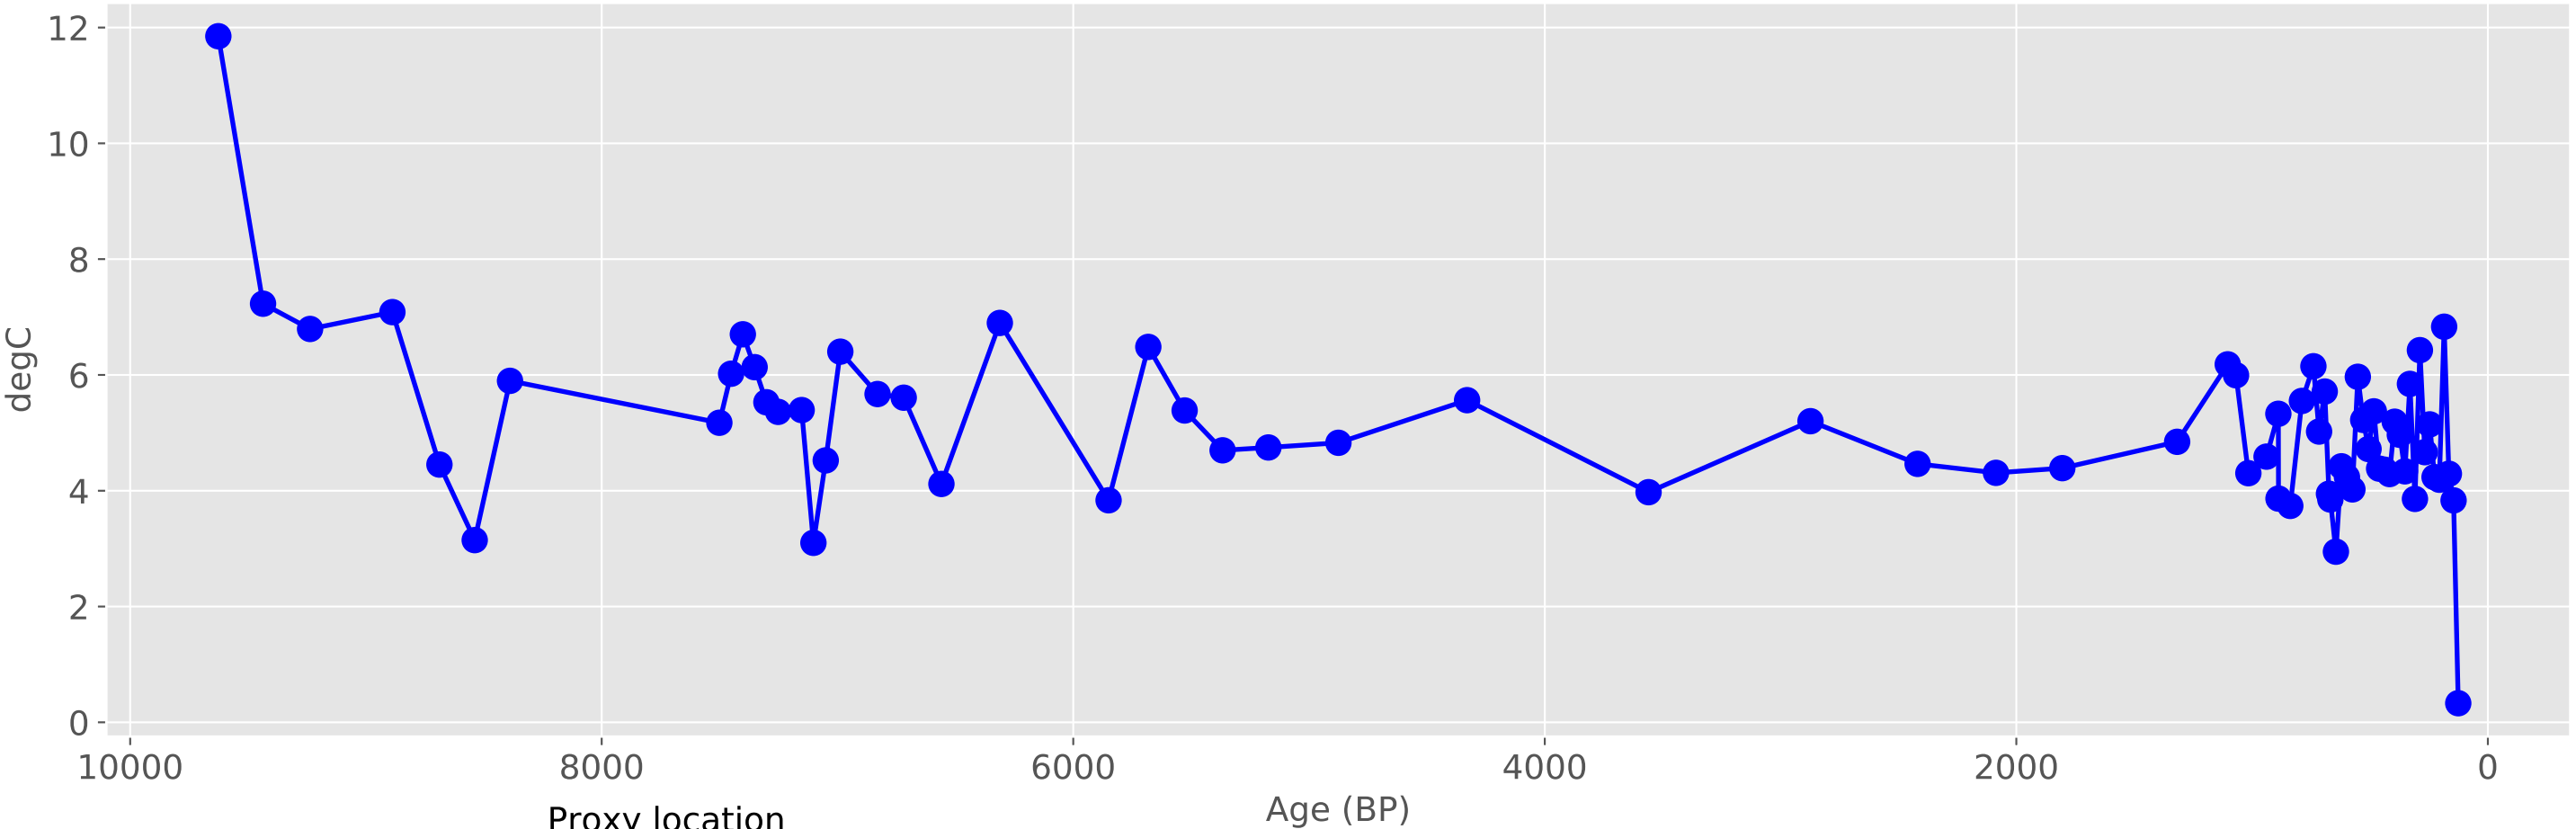

Proxy location  
(73.68 ° N, 162.66 ° W)

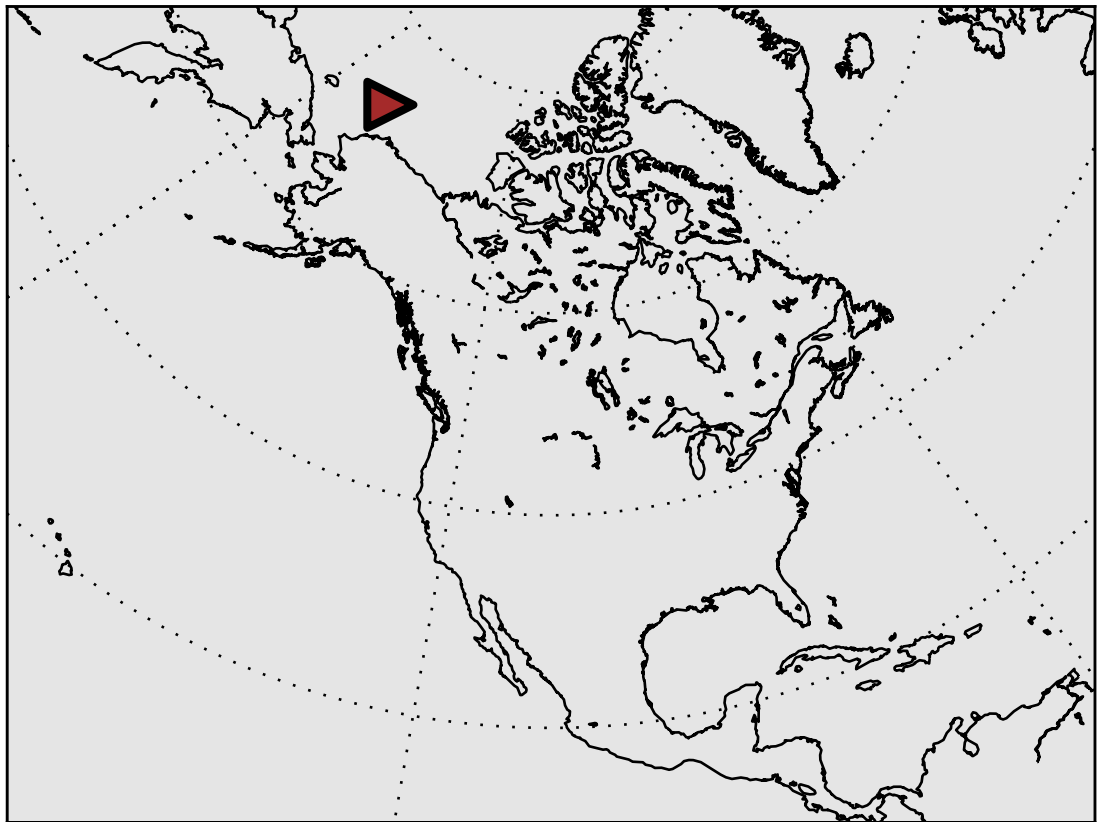

|                    |                                                       |
|--------------------|-------------------------------------------------------|
| Dataset name:      | P1B3.deVernal.2005                                    |
| Archive type:      | MarineSediment                                        |
| Proxy type:        | dinocyst                                              |
| Variable name:     | temperature                                           |
| Latitude ( ° N):   | 73.683                                                |
| Longitude ( ° E):  | -162.66                                               |
| Elevation (m):     | -201.0                                                |
| Interp. variable:  | T                                                     |
| Interp. detail:    | sea@surface                                           |
| Interp. season:    | summer+                                               |
| Interp. direction: | positive                                              |
| Pub. 1 title:      | Variability of sea ice cover in the Chukchi Sea (w... |
| Pub. 1 authors:    | de Vernal, Anne; Hillaire-Marcel, Claude; Darby, D... |
| Pub. 1 year:       | 2005                                                  |
| Pub. 1 DOI:        | 10.1029/2005PA001157                                  |
| Original data URL: | www.ncdc.noaa.gov/paleo/study/15444                   |

Proxy data and metadata  
MarineSediment | dinocyst | P1B3.deVernal.2005 | PYTQHN7NGKA

Proxy time series: Sea\_Ice\_months

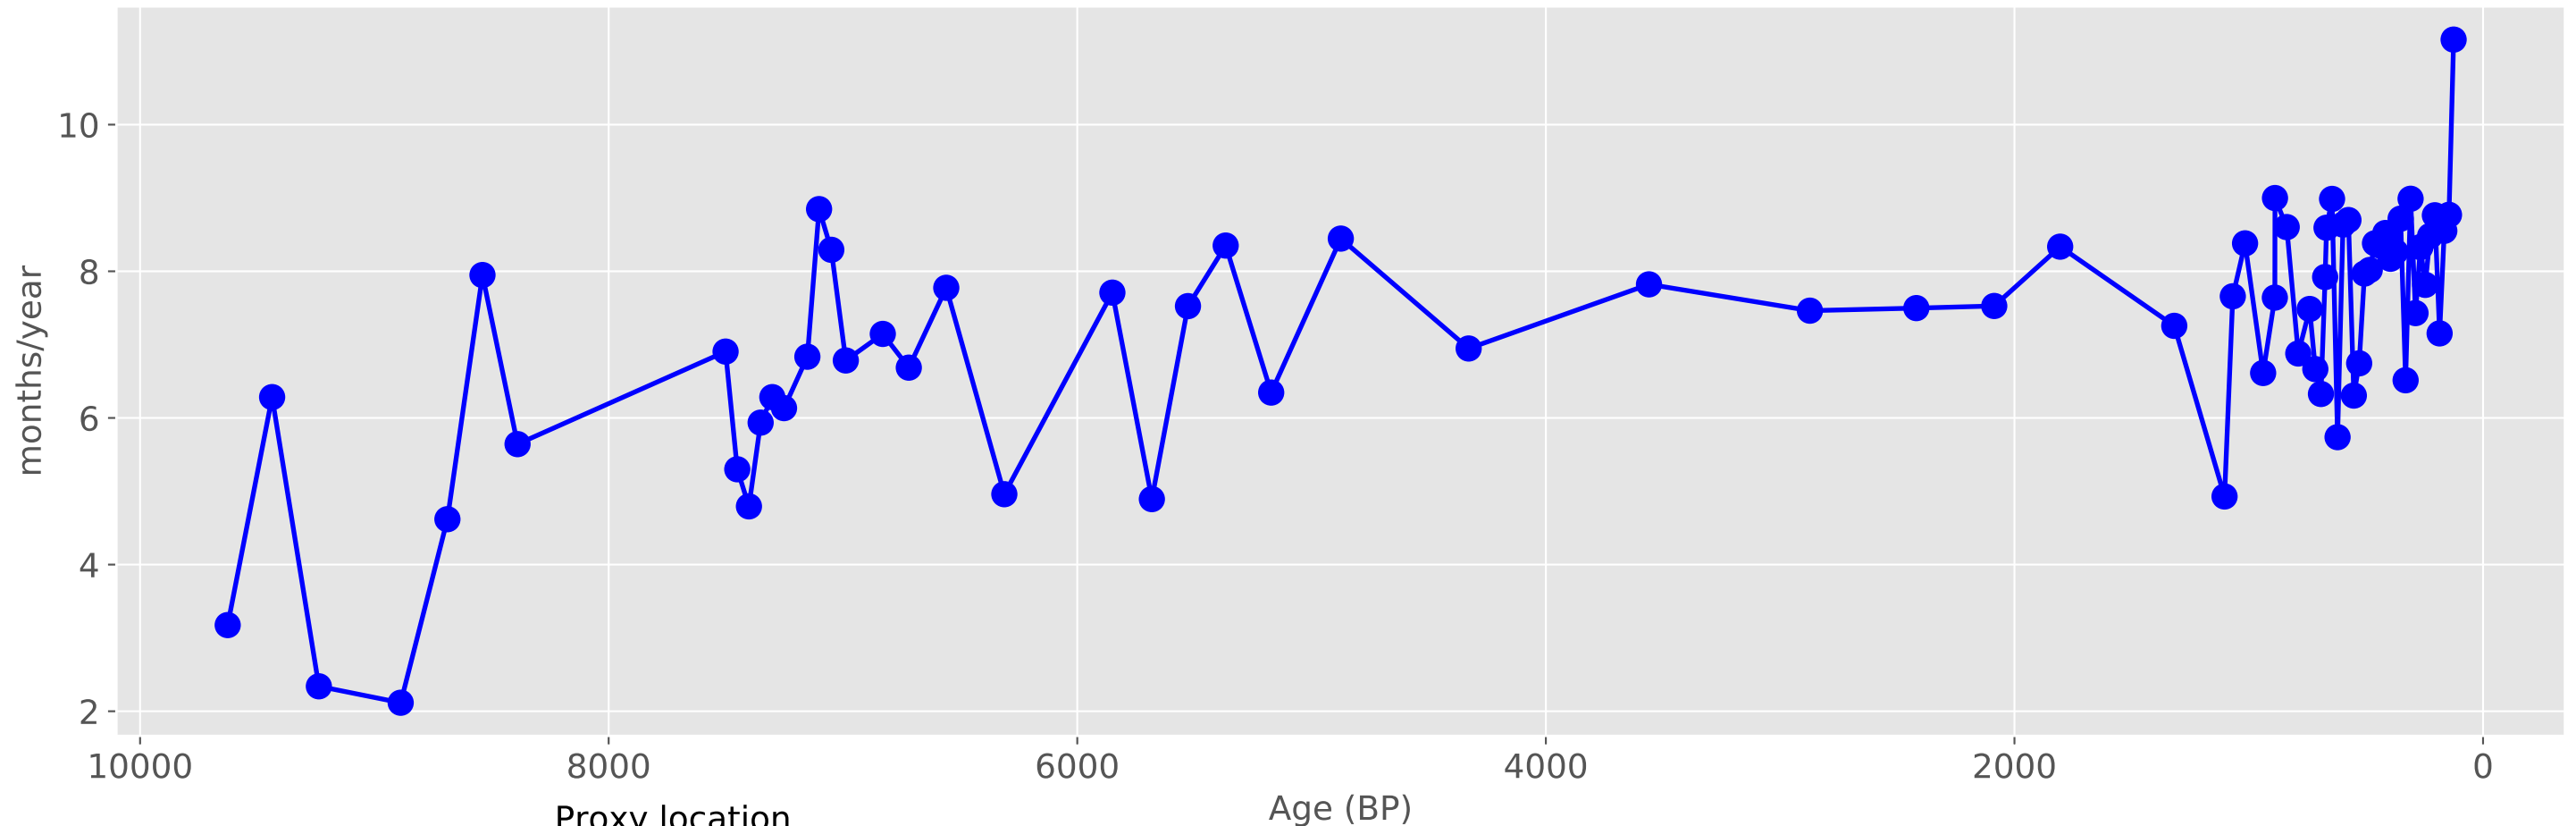

Proxy location  
(73.68 ° N, 162.66 ° W)

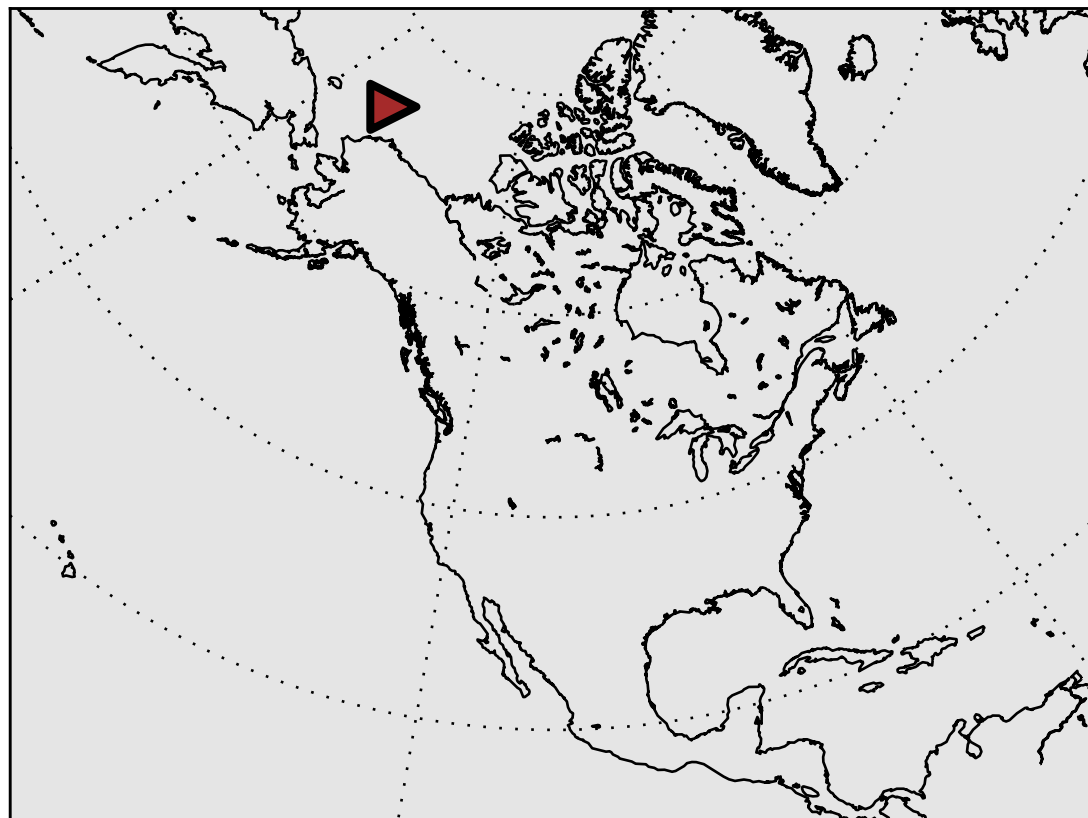

|                    |                                                                                              |
|--------------------|----------------------------------------------------------------------------------------------|
| Dataset name:      | P1B3.deVernal.2005                                                                           |
| Archive type:      | MarineSediment                                                                               |
| Proxy type:        | dinocyst                                                                                     |
| Variable name:     | Sea_Ice_months                                                                               |
| Latitude ( ° N):   | 73.683                                                                                       |
| Longitude ( ° E):  | -162.66                                                                                      |
| Elevation (m):     | -201.0                                                                                       |
| Interp. variable:  | ICE                                                                                          |
| Interp. detail:    | sea@surface                                                                                  |
| Interp. season:    | annual                                                                                       |
| Interp. direction: | positive                                                                                     |
| Pub. 1 title:      | Variability of sea ice cover in the Chukchi Sea (w...                                        |
| Pub. 1 authors:    | de Vernal, Anne; Hillaire-Marcel, Claude; Darby, D...                                        |
| Pub. 1 year:       | 2005                                                                                         |
| Pub. 1 DOI:        | 10.1029/2005PA001157                                                                         |
| Original data URL: | <a href="http://www.ncdc.noaa.gov/paleo/study/15444">www.ncdc.noaa.gov/paleo/study/15444</a> |



Proxy data and metadata  
MarineSediment | dinocyst | P1B3.deVernal.2005 | PYTTTRD8PMK

Proxy time series: temperatureComposite

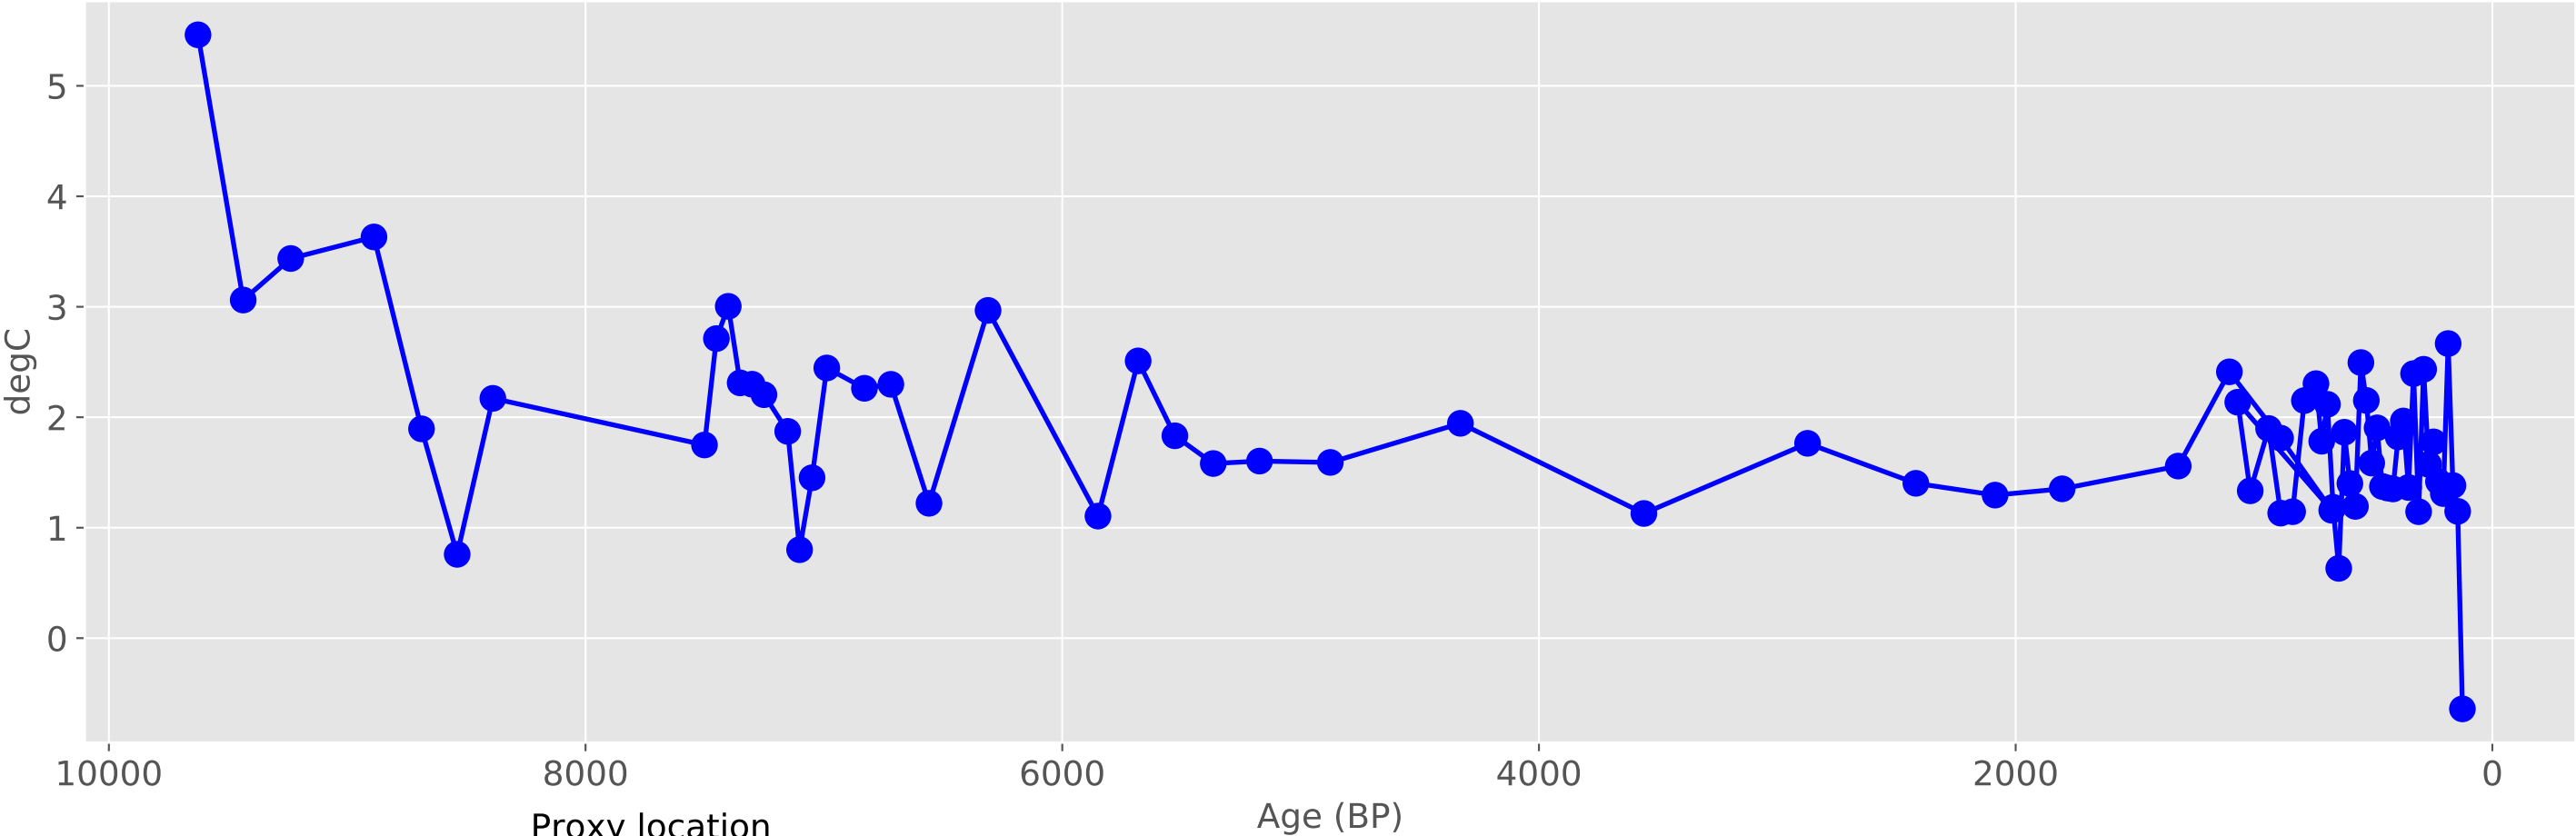

Proxy location  
(73.68 ° N, 162.66 ° W)

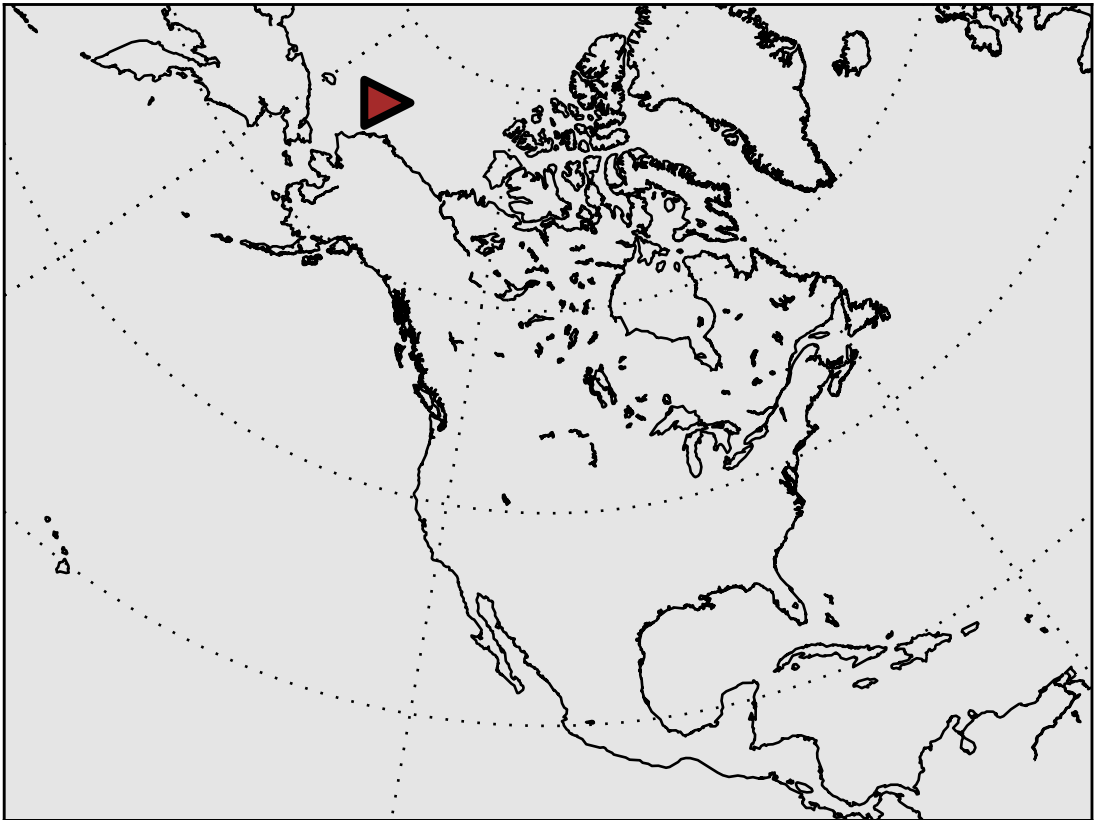

|                    |                                                                                              |
|--------------------|----------------------------------------------------------------------------------------------|
| Dataset name:      | P1B3.deVernal.2005                                                                           |
| Archive type:      | MarineSediment                                                                               |
| Proxy type:        | dinocyst                                                                                     |
| Variable name:     | temperatureComposite                                                                         |
| Latitude ( ° N):   | 73.683                                                                                       |
| Longitude ( ° E):  | -162.66                                                                                      |
| Elevation (m):     | -201.0                                                                                       |
| Interp. variable:  | T                                                                                            |
| Interp. detail:    | sea@surface                                                                                  |
| Interp. season:    | annual                                                                                       |
| Interp. direction: | positive                                                                                     |
| Pub. 1 title:      | Variability of sea ice cover in the Chukchi Sea (w...                                        |
| Pub. 1 authors:    | de Vernal, Anne; Hillaire-Marcel, Claude; Darby, D...                                        |
| Pub. 1 year:       | 2005                                                                                         |
| Pub. 1 DOI:        | 10.1029/2005PA001157                                                                         |
| Original data URL: | <a href="http://www.ncdc.noaa.gov/paleo/study/15444">www.ncdc.noaa.gov/paleo/study/15444</a> |

Proxy data and metadata

MarineSediment | dinocyst | HLY0501.deVernal.2013 | PYT9Y0BB33N

Proxy time series: temperature

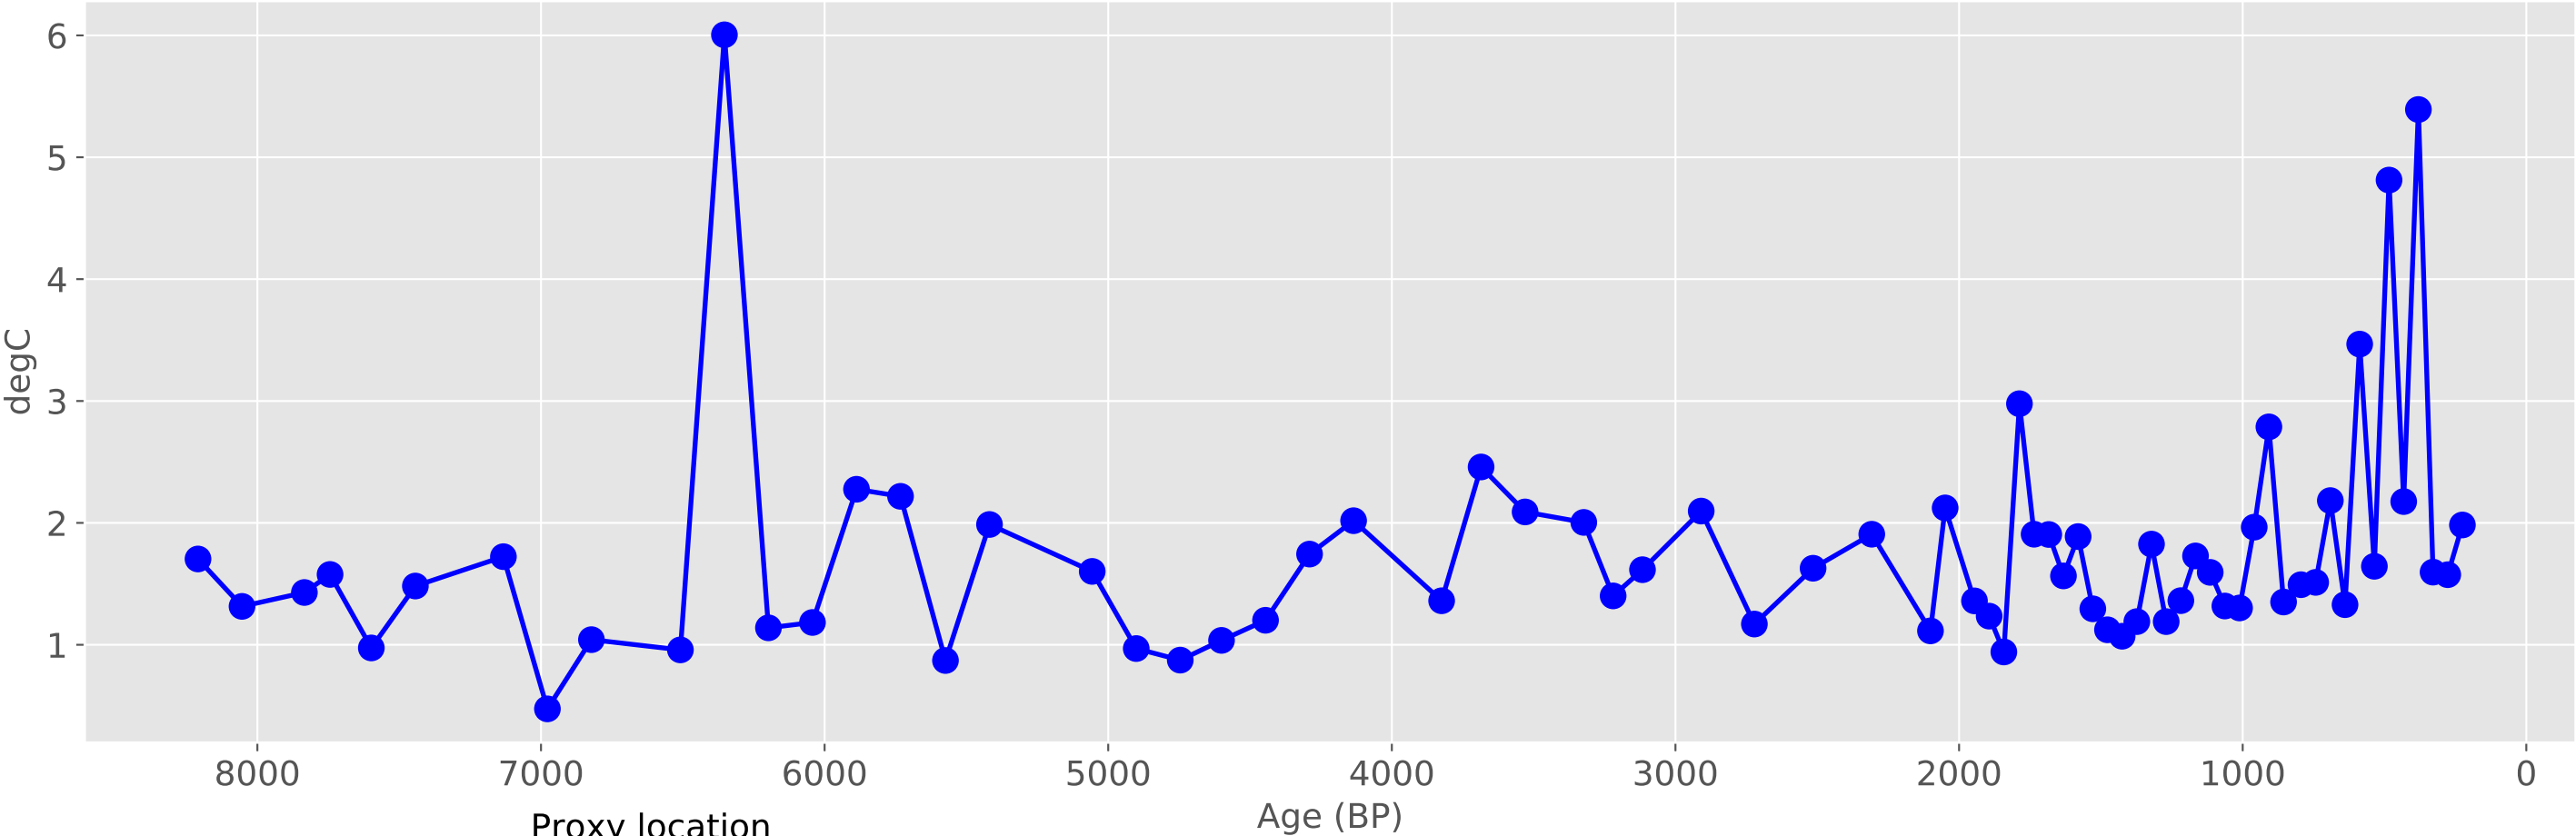

Proxy location  
(72.69 ° N, 157.52 ° W)

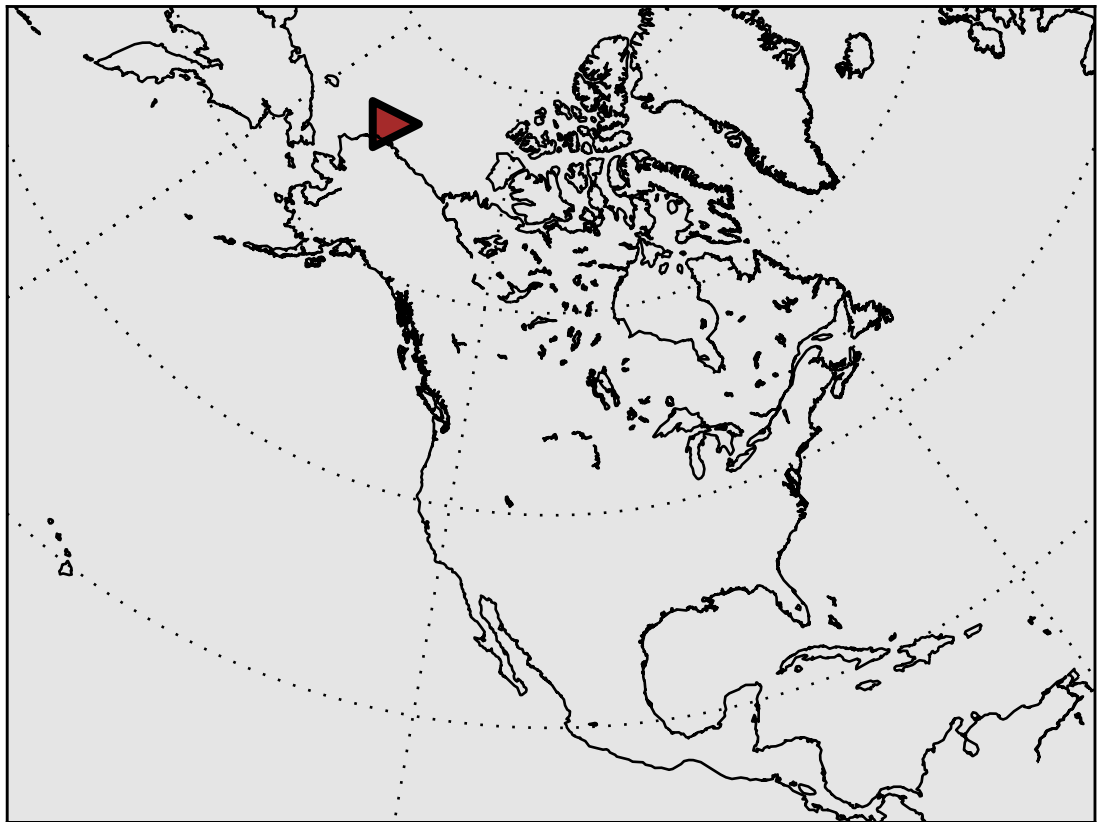

|                    |                                                       |
|--------------------|-------------------------------------------------------|
| Dataset name:      | HLY0501.deVernal.2013                                 |
| Archive type:      | MarineSediment                                        |
| Proxy type:        | dinocyst                                              |
| Variable name:     | temperature                                           |
| Latitude ( ° N):   | 72.6947                                               |
| Longitude ( ° E):  | -157.52                                               |
| Elevation (m):     | -415.0                                                |
| Interp. variable:  | T                                                     |
| Interp. detail:    | sea@surface                                           |
| Interp. season:    | annual                                                |
| Interp. direction: | positive                                              |
| Pub. 1 title:      | Dinocyst-based reconstructions of sea ice cover co... |
| Pub. 1 authors:    | de Vernal, Anne; Hillaire-Marcel, Claude; Rochon, ... |
| Pub. 1 year:       | 2013                                                  |
| Pub. 1 DOI:        | 10.1016/j.quascirev.2013.07.006                       |
| Original data URL: | www.ncdc.noaa.gov/paleo/study/15444                   |

Proxy data and metadata  
MarineSediment | dinocyst | HLY0501.deVernal.2013 | PYTKI3J0T5T

Proxy time series: temperature

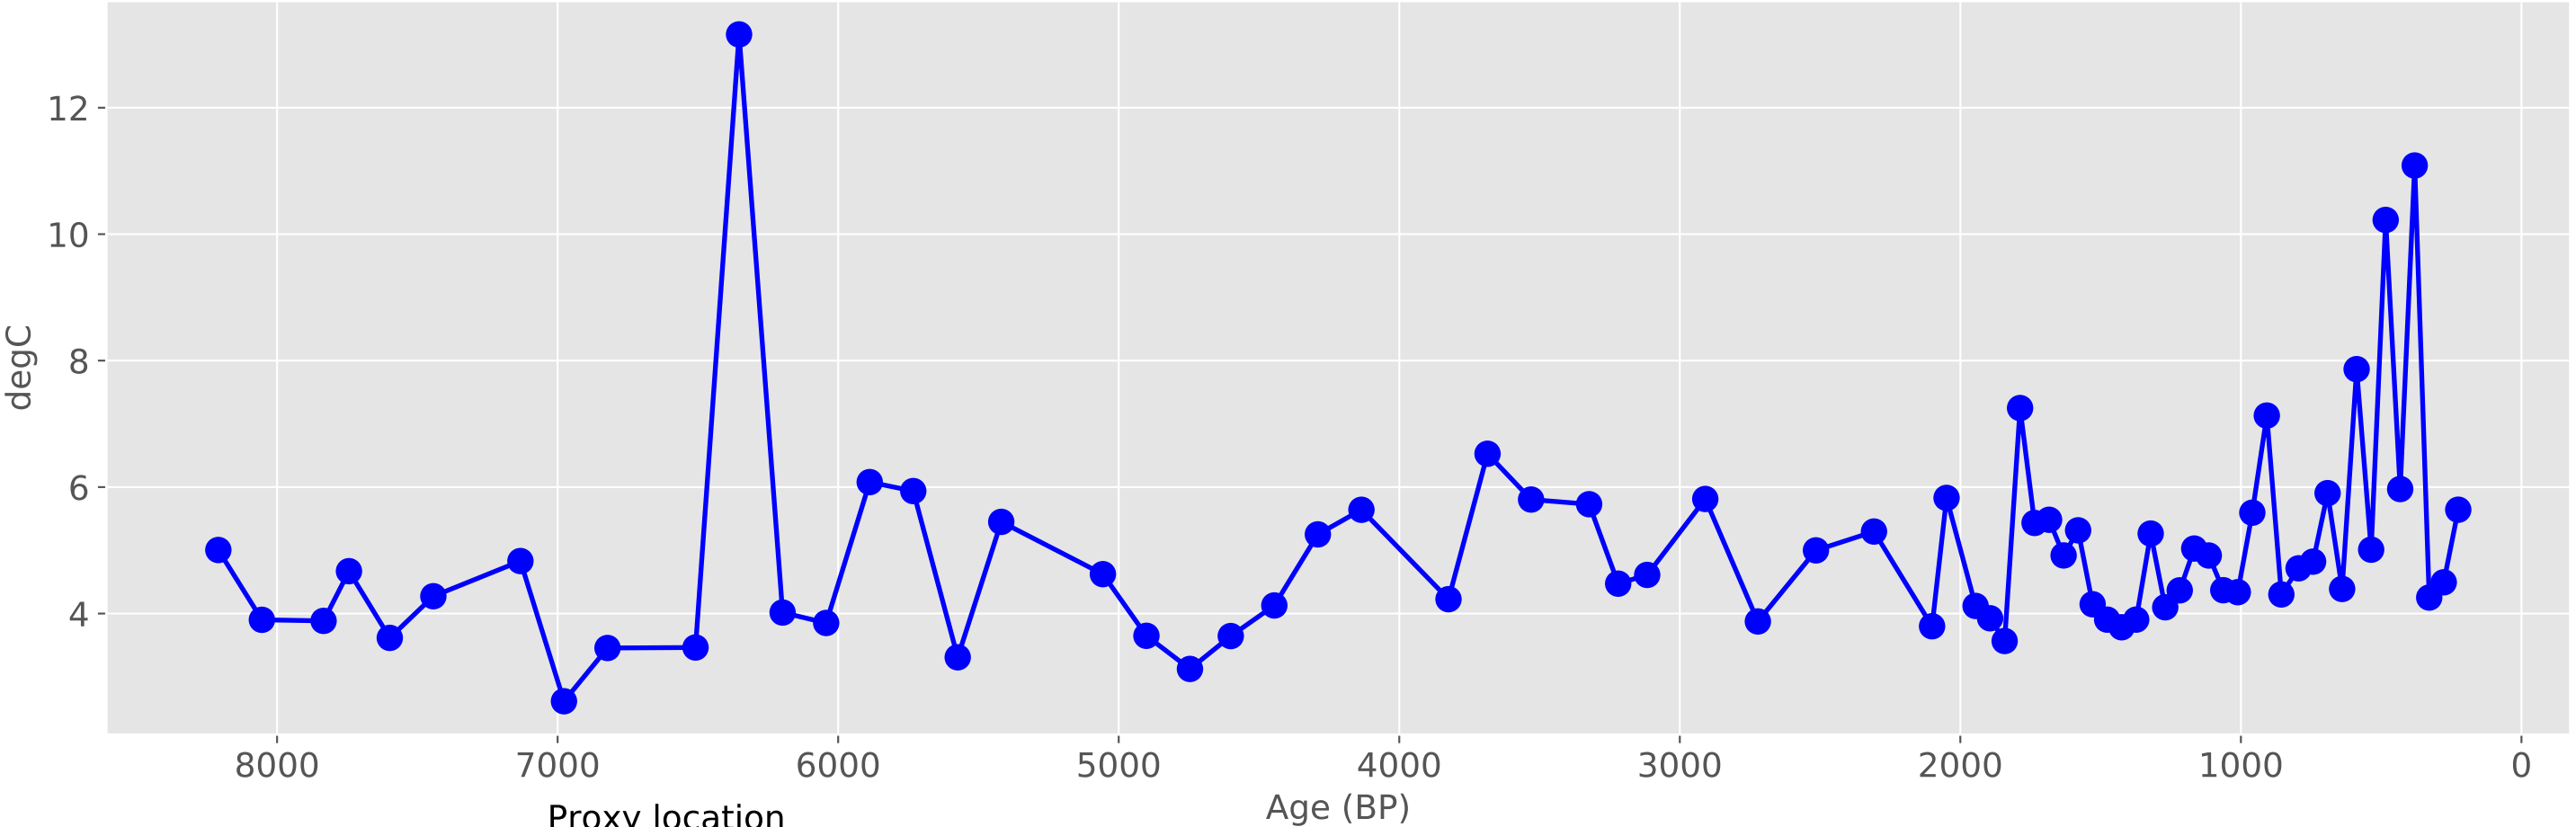

Proxy location  
(72.69 ° N, 157.52 ° W)



|                    |                                                       |
|--------------------|-------------------------------------------------------|
| Dataset name:      | HLY0501.deVernal.2013                                 |
| Archive type:      | MarineSediment                                        |
| Proxy type:        | dinocyst                                              |
| Variable name:     | temperature                                           |
| Latitude ( ° N):   | 72.6947                                               |
| Longitude ( ° E):  | -157.52                                               |
| Elevation (m):     | -415.0                                                |
| Interp. variable:  | T                                                     |
| Interp. detail:    | sea@surface                                           |
| Interp. season:    | summer+                                               |
| Interp. direction: | positive                                              |
| Pub. 1 title:      | Dinocyst-based reconstructions of sea ice cover co... |
| Pub. 1 authors:    | de Vernal, Anne; Hillaire-Marcel, Claude; Rochon, ... |
| Pub. 1 year:       | 2013                                                  |
| Pub. 1 DOI:        | 10.1016/j.quascirev.2013.07.006                       |
| Original data URL: | www.ncdc.noaa.gov/paleo/study/15444                   |

Proxy data and metadata

MarineSediment | dinocyst | HLY0501.deVernal.2013 | PYTONH307X5

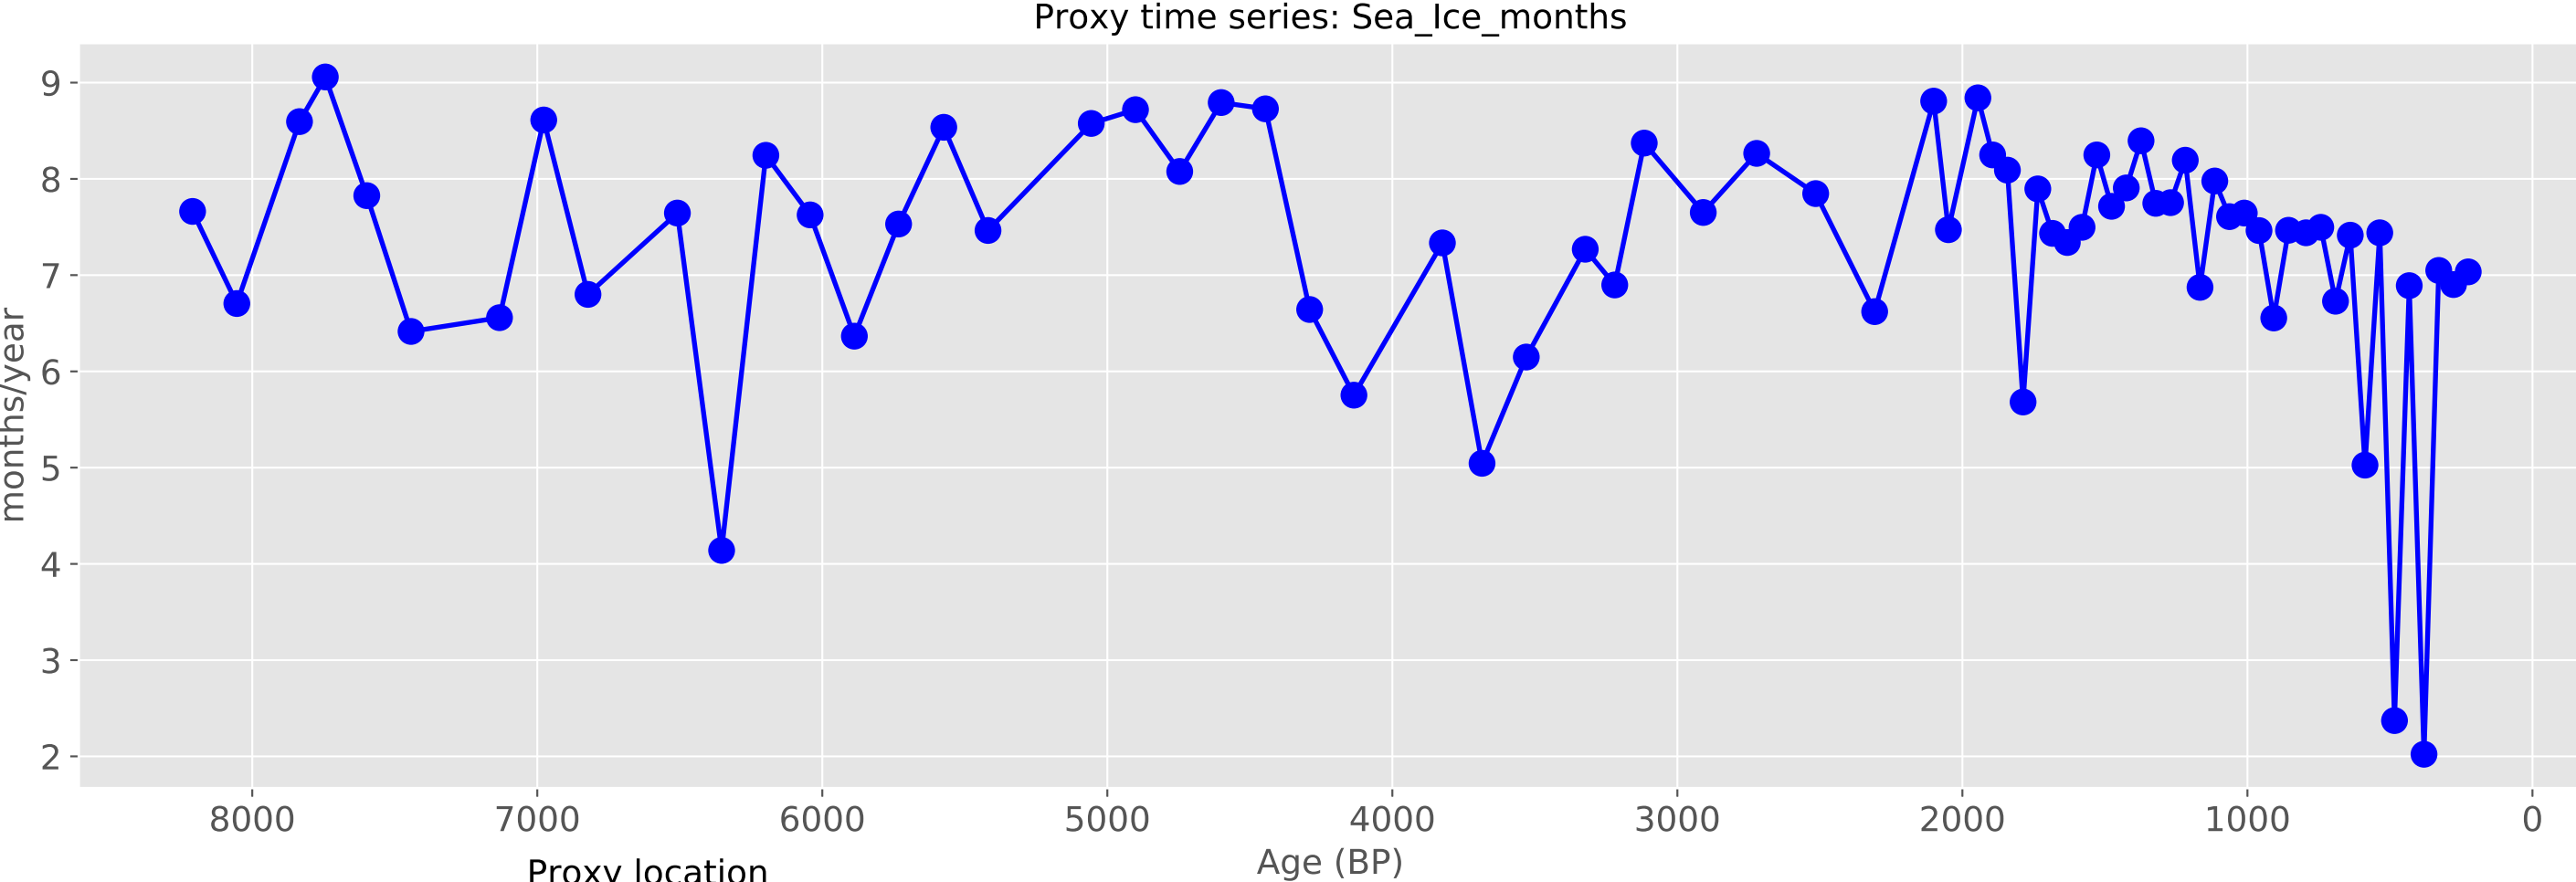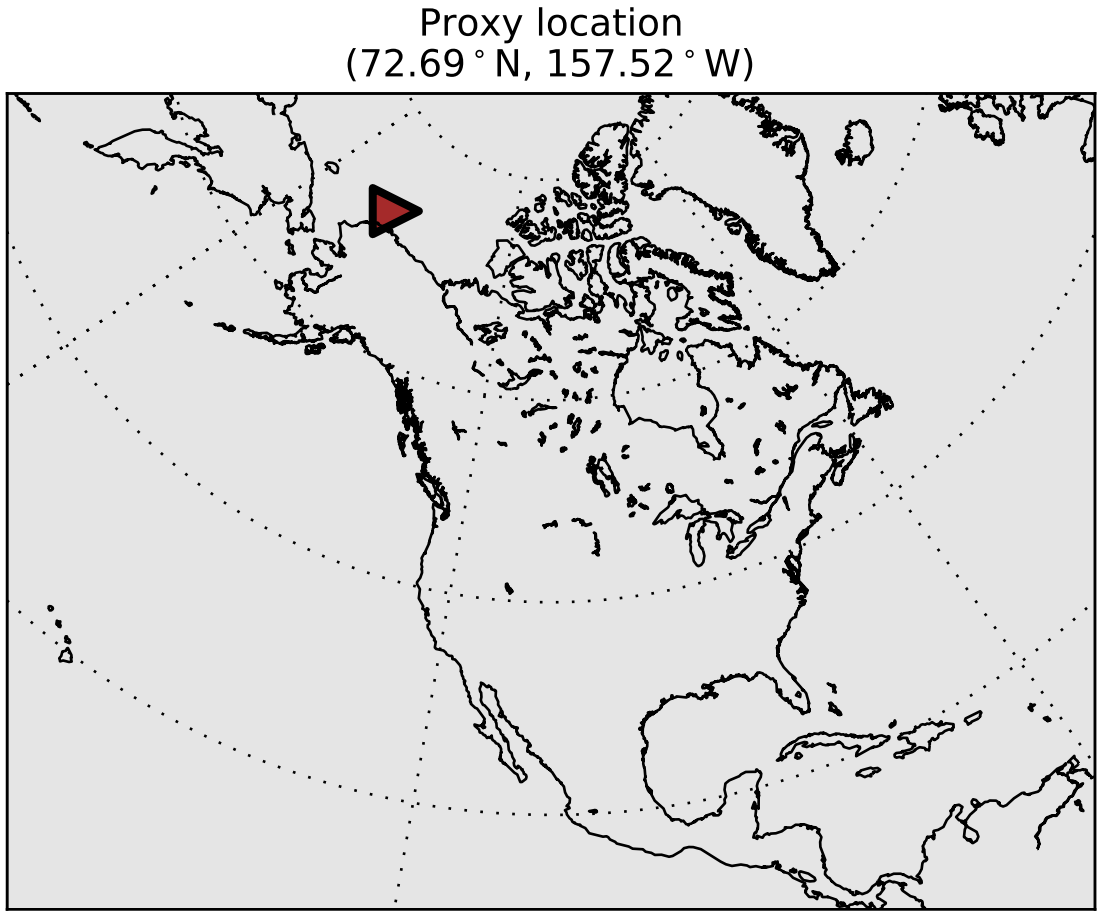

|                    |                                                       |
|--------------------|-------------------------------------------------------|
| Dataset name:      | HLY0501.deVernal.2013                                 |
| Archive type:      | MarineSediment                                        |
| Proxy type:        | dinocyst                                              |
| Variable name:     | Sea_Ice_months                                        |
| Latitude ( ° N):   | 72.6947                                               |
| Longitude ( ° E):  | -157.52                                               |
| Elevation (m):     | -415.0                                                |
| Interp. variable:  | ICE                                                   |
| Interp. detail:    | sea@surface                                           |
| Interp. season:    | annual                                                |
| Interp. direction: | positive                                              |
| Pub. 1 title:      | Dinocyst-based reconstructions of sea ice cover co... |
| Pub. 1 authors:    | de Vernal, Anne; Hillaire-Marcel, Claude; Rochon, ... |
| Pub. 1 year:       | 2013                                                  |
| Pub. 1 DOI:        | 10.1016/j.quascirev.2013.07.006                       |
| Original data URL: | www.ncdc.noaa.gov/paleo/study/15444                   |

Proxy data and metadata  
MarineSediment | dinocyst | GGC19.Farmer.2011 | PYT4DJUFWUA

Proxy time series: sealce

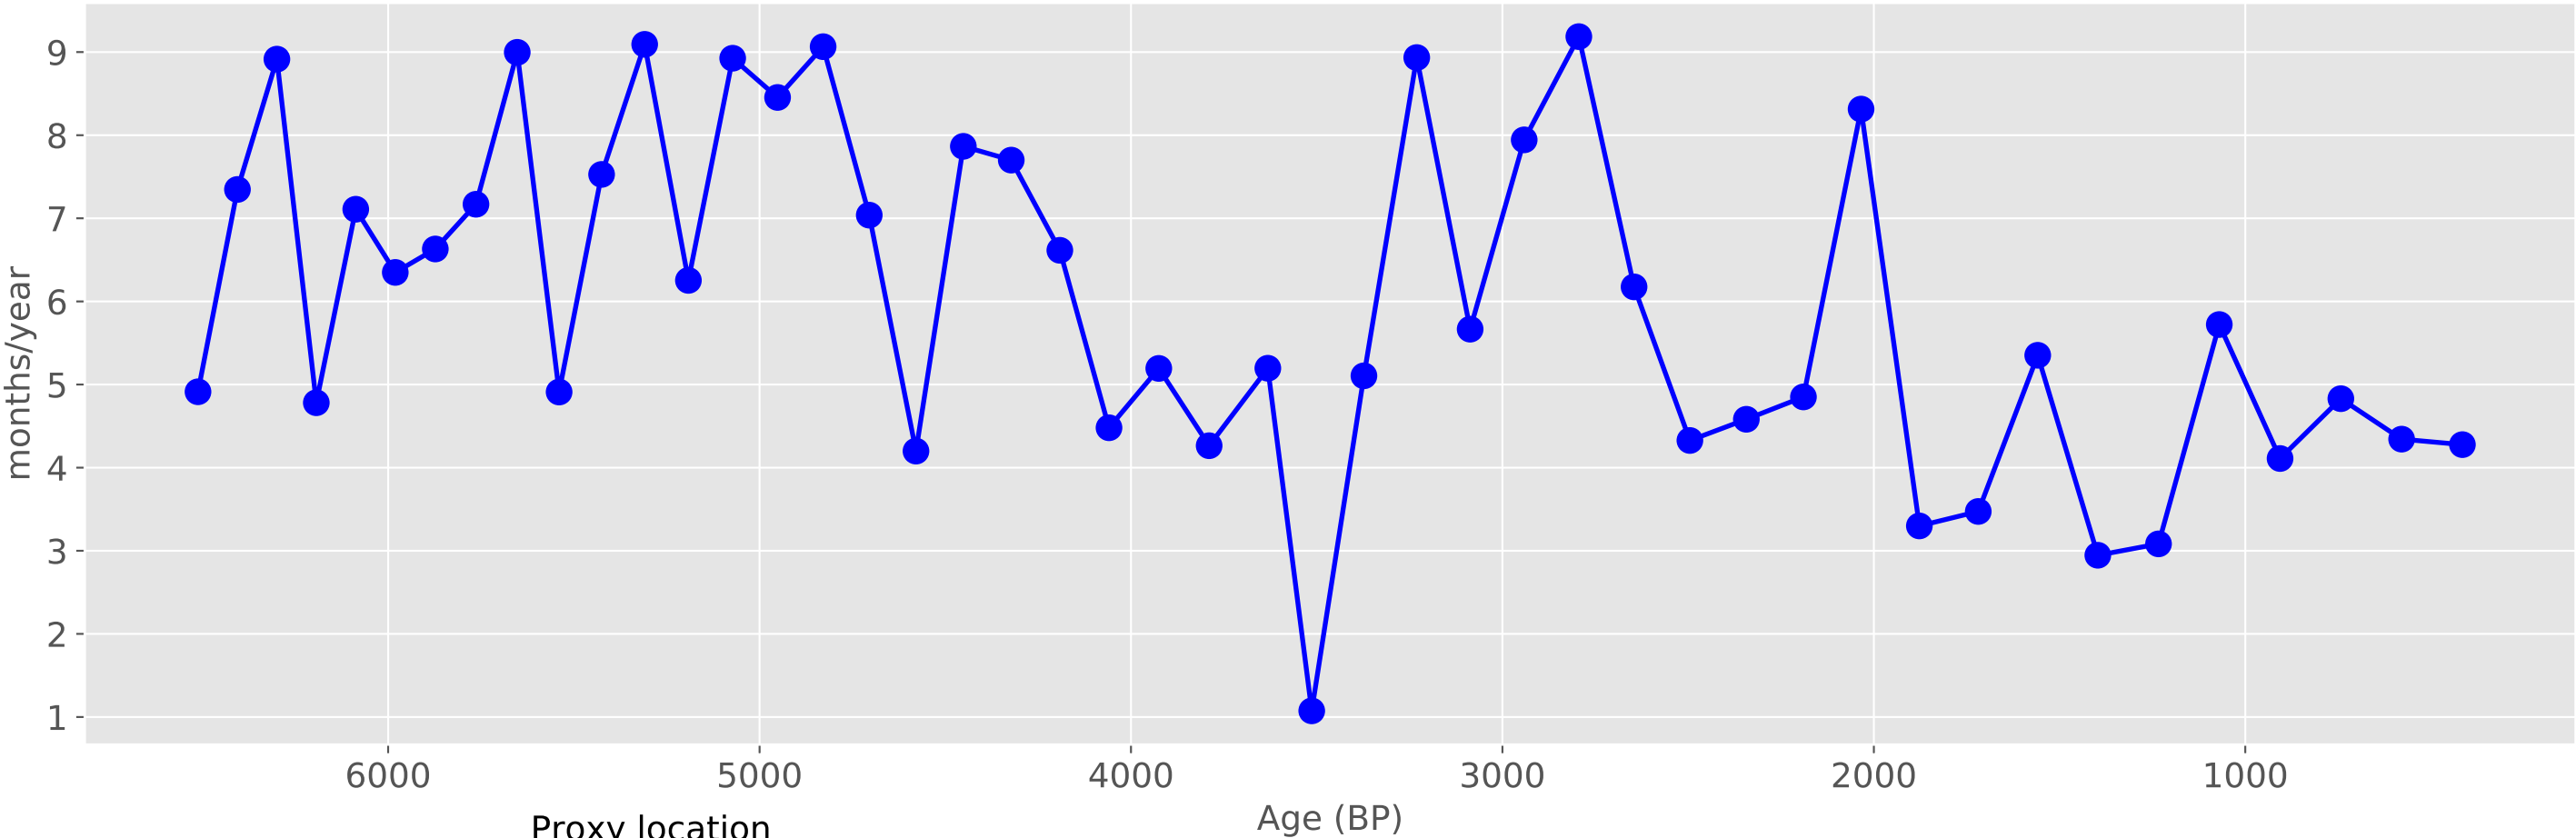

Proxy location  
(72.16 ° N, 155.51 ° W)

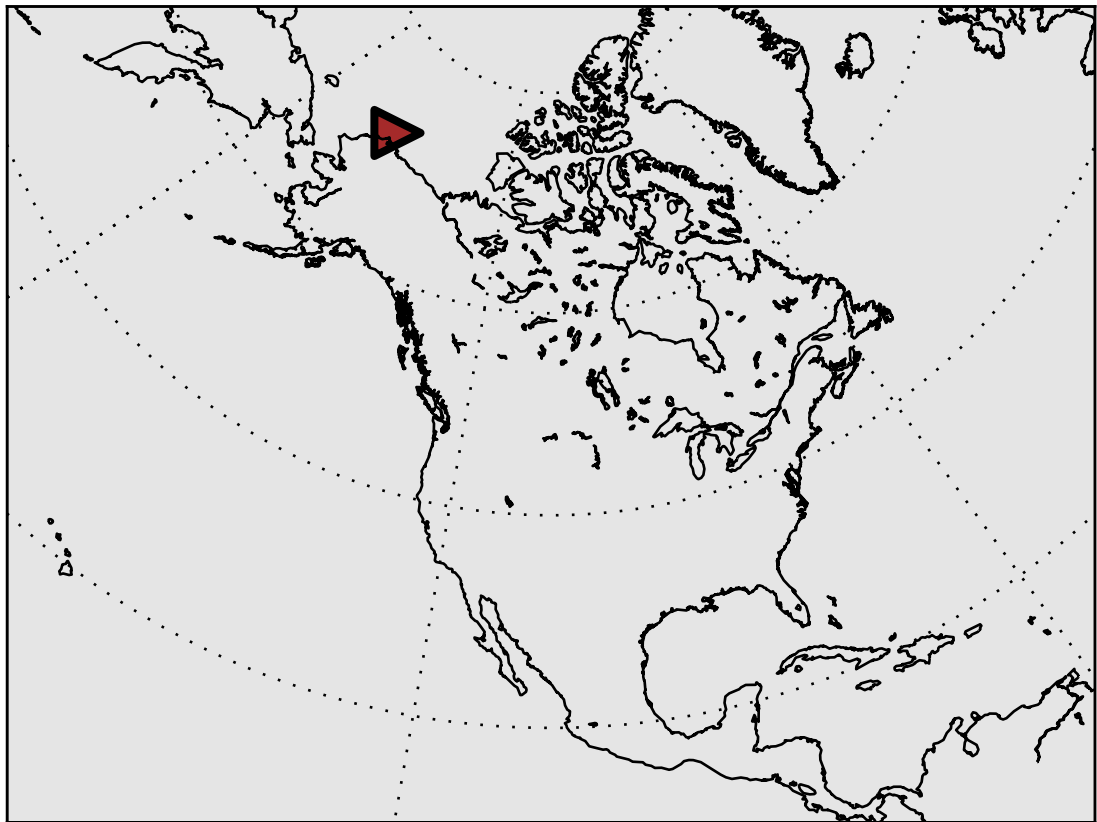

|                    |                                                       |
|--------------------|-------------------------------------------------------|
| Dataset name:      | GGC19.Farmer.2011                                     |
| Archive type:      | MarineSediment                                        |
| Proxy type:        | dinocyst                                              |
| Variable name:     | sealce                                                |
| Latitude ( ° N):   | 72.16                                                 |
| Longitude ( ° E):  | -155.51                                               |
| Elevation (m):     | -369.0                                                |
| Interp. variable:  | ICE                                                   |
| Interp. detail:    | sea@surface                                           |
| Interp. season:    | annual                                                |
| Interp. direction: | positive                                              |
| Pub. 1 title:      | Western Arctic Ocean temperature variability durin... |
| Pub. 1 authors:    | Farmer, Jesse R.; Cronin, Thomas M.; de Vernal, An... |
| Pub. 1 year:       | 2011                                                  |
| Pub. 1 DOI:        | 10.1029/2011GL049714                                  |
| Original data URL: | www.ncdc.noaa.gov/paleo/study/15444                   |

Proxy data and metadata  
MarineSediment | dinocyst | GGC19.Farmer.2011 | PYT6D3JR7SB

Proxy time series: temperature

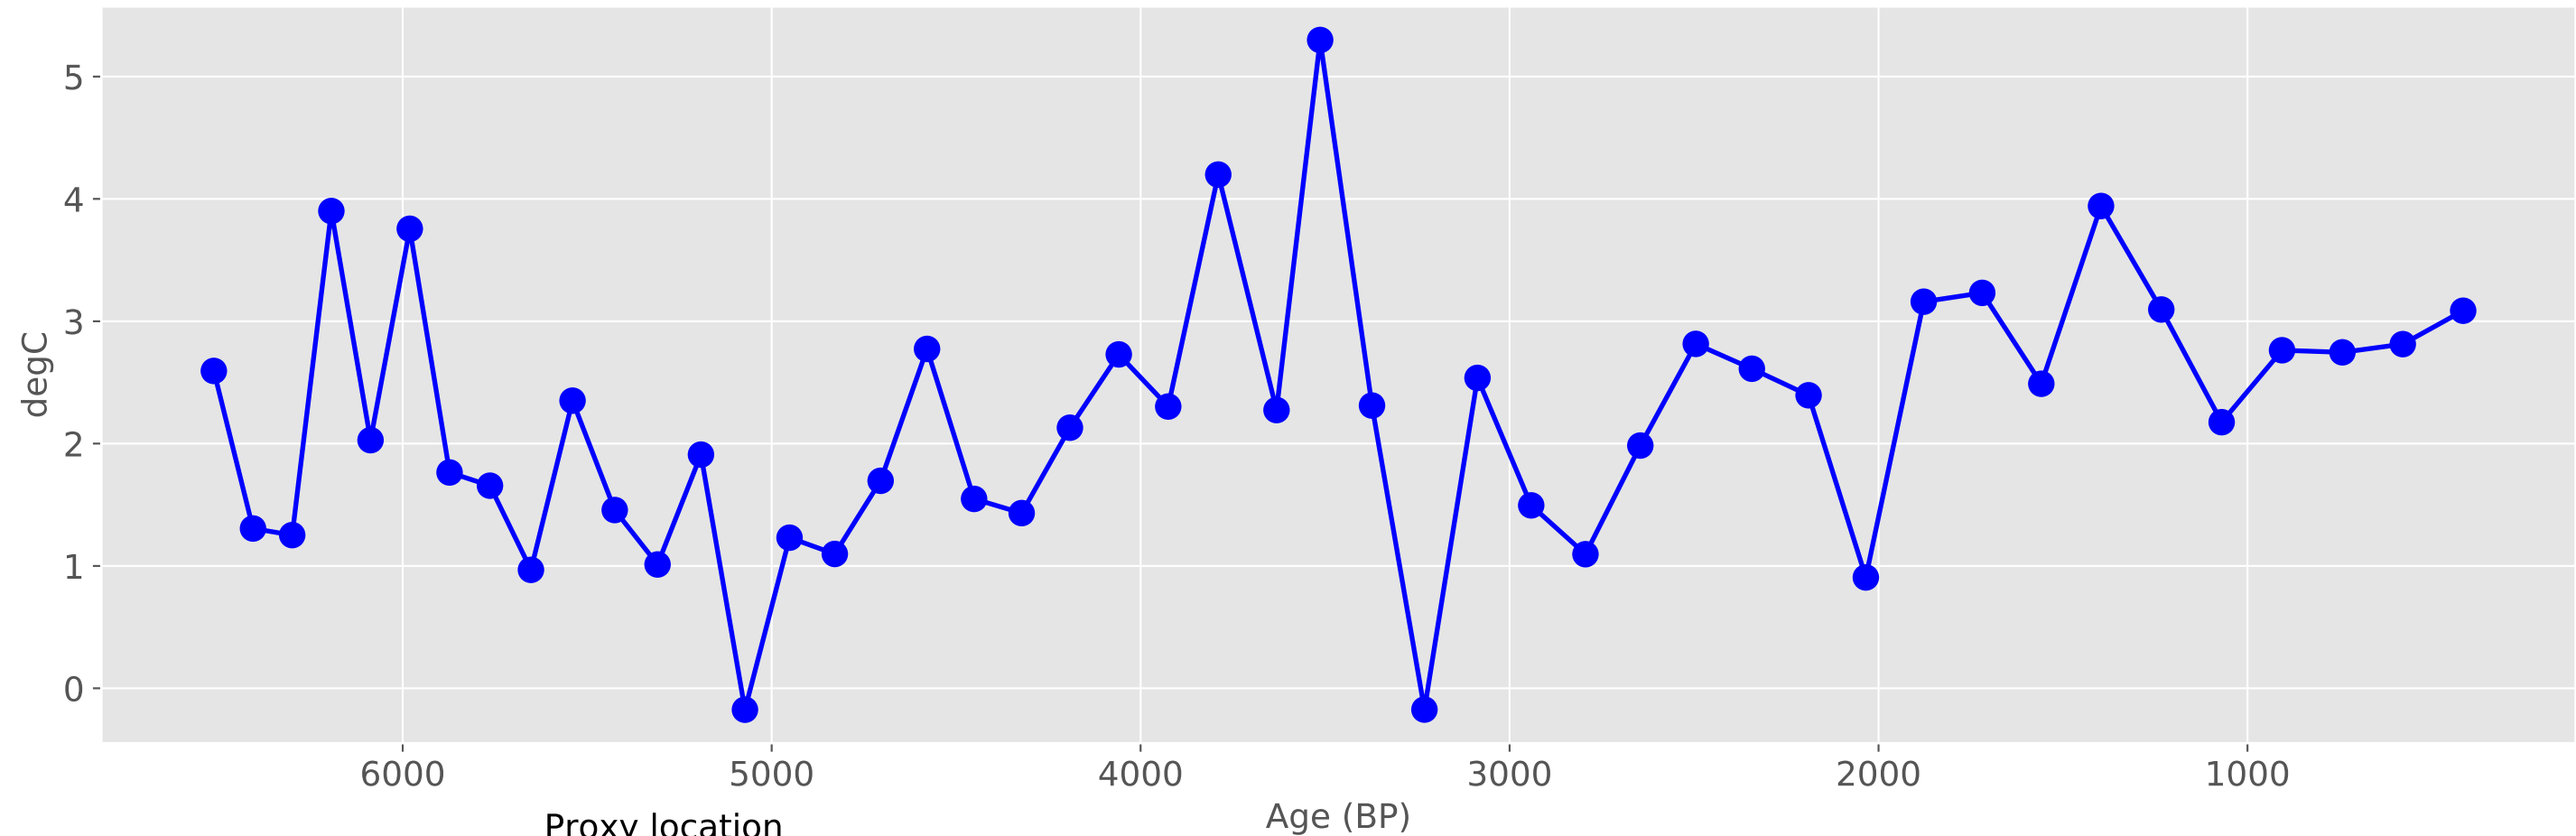

Proxy location  
(72.16 ° N, 155.51 ° W)



|                    |                                                                                              |
|--------------------|----------------------------------------------------------------------------------------------|
| Dataset name:      | GGC19.Farmer.2011                                                                            |
| Archive type:      | MarineSediment                                                                               |
| Proxy type:        | dinocyst                                                                                     |
| Variable name:     | temperature                                                                                  |
| Latitude ( ° N):   | 72.16                                                                                        |
| Longitude ( ° E):  | -155.51                                                                                      |
| Elevation (m):     | -369.0                                                                                       |
| Interp. variable:  | T                                                                                            |
| Interp. detail:    | sea@surface                                                                                  |
| Interp. season:    | annual                                                                                       |
| Interp. direction: | positive                                                                                     |
| Pub. 1 title:      | Western Arctic Ocean temperature variability durin...                                        |
| Pub. 1 authors:    | Farmer, Jesse R.; Cronin, Thomas M.; de Vernal, An...                                        |
| Pub. 1 year:       | 2011                                                                                         |
| Pub. 1 DOI:        | 10.1029/2011GL049714                                                                         |
| Original data URL: | <a href="http://www.ncdc.noaa.gov/paleo/study/15444">www.ncdc.noaa.gov/paleo/study/15444</a> |



Proxy data and metadata

MarineSediment | dinocyst | GGC19.Farmer.2011 | PYTLU4EW21I

Proxy time series: temperature

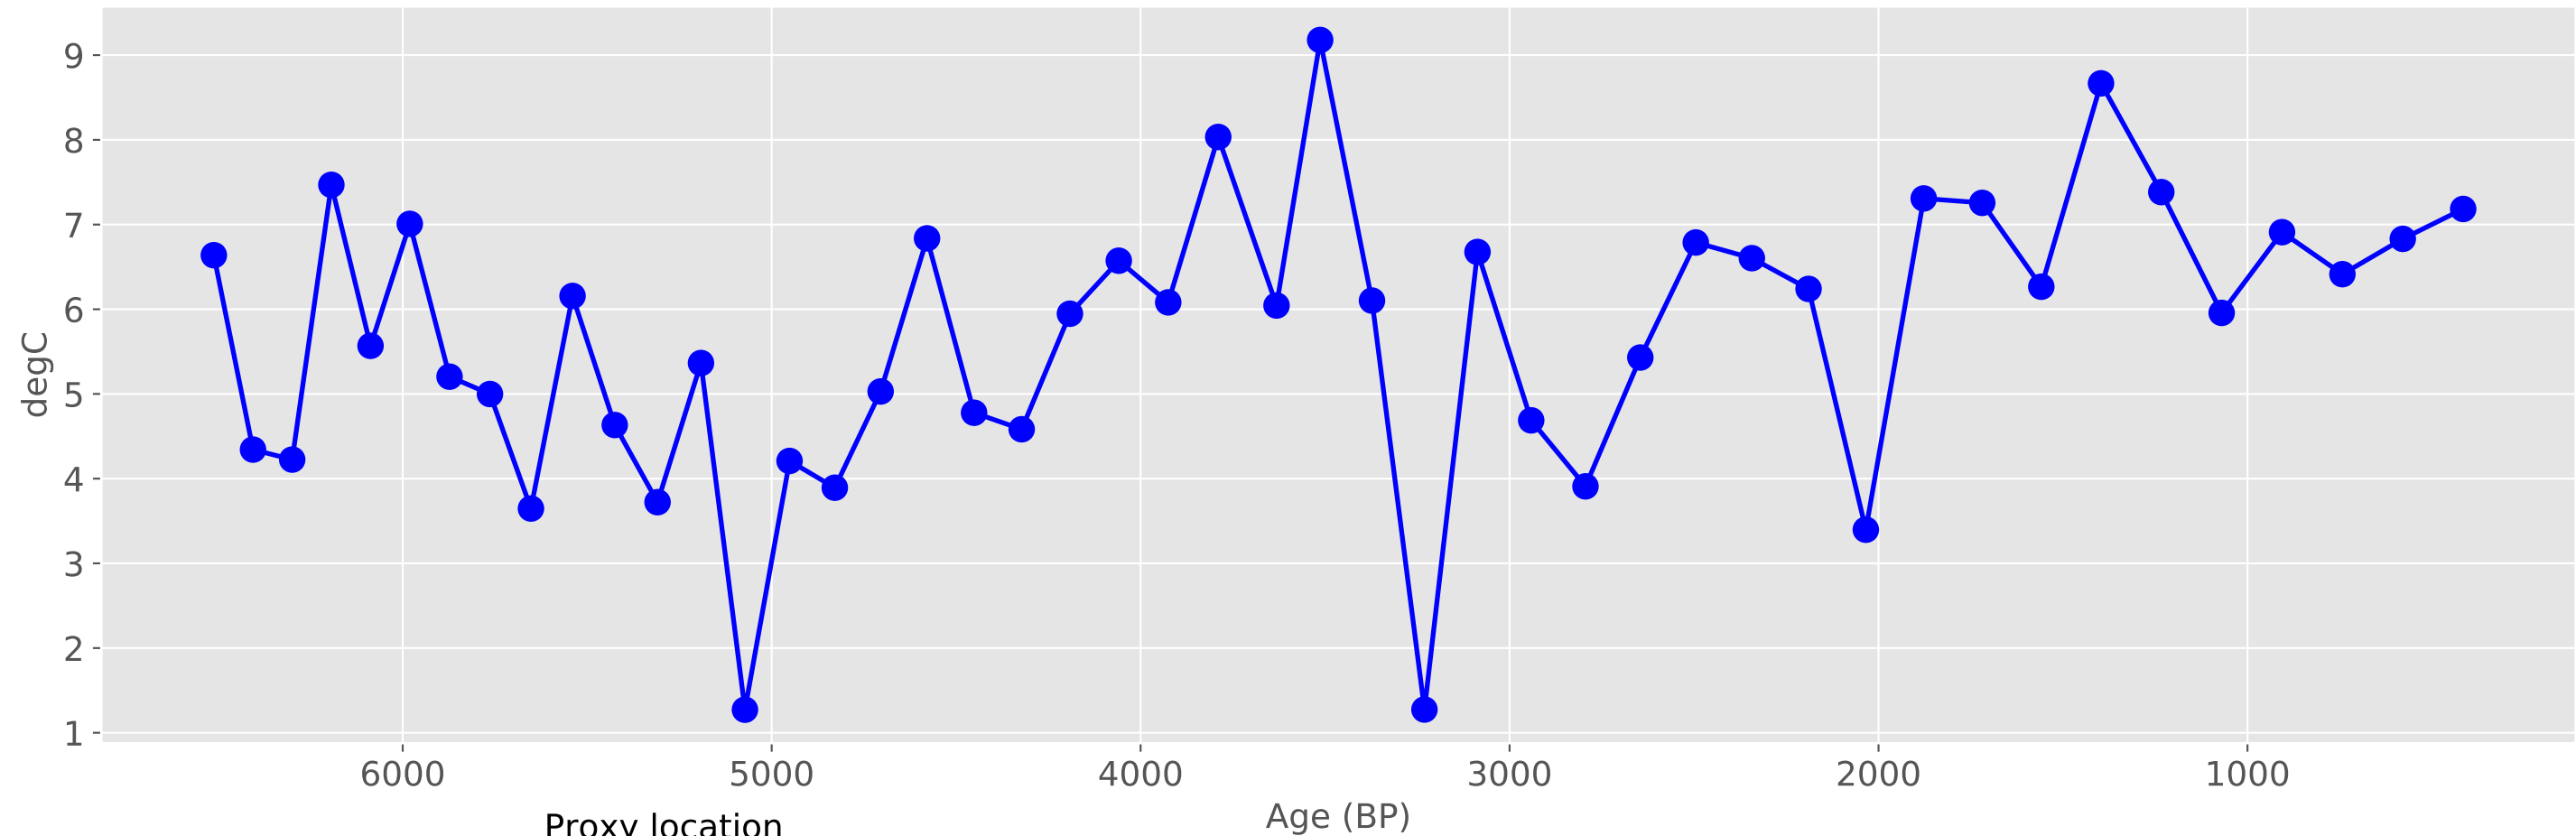

Proxy location  
(72.16 ° N, 155.51 ° W)

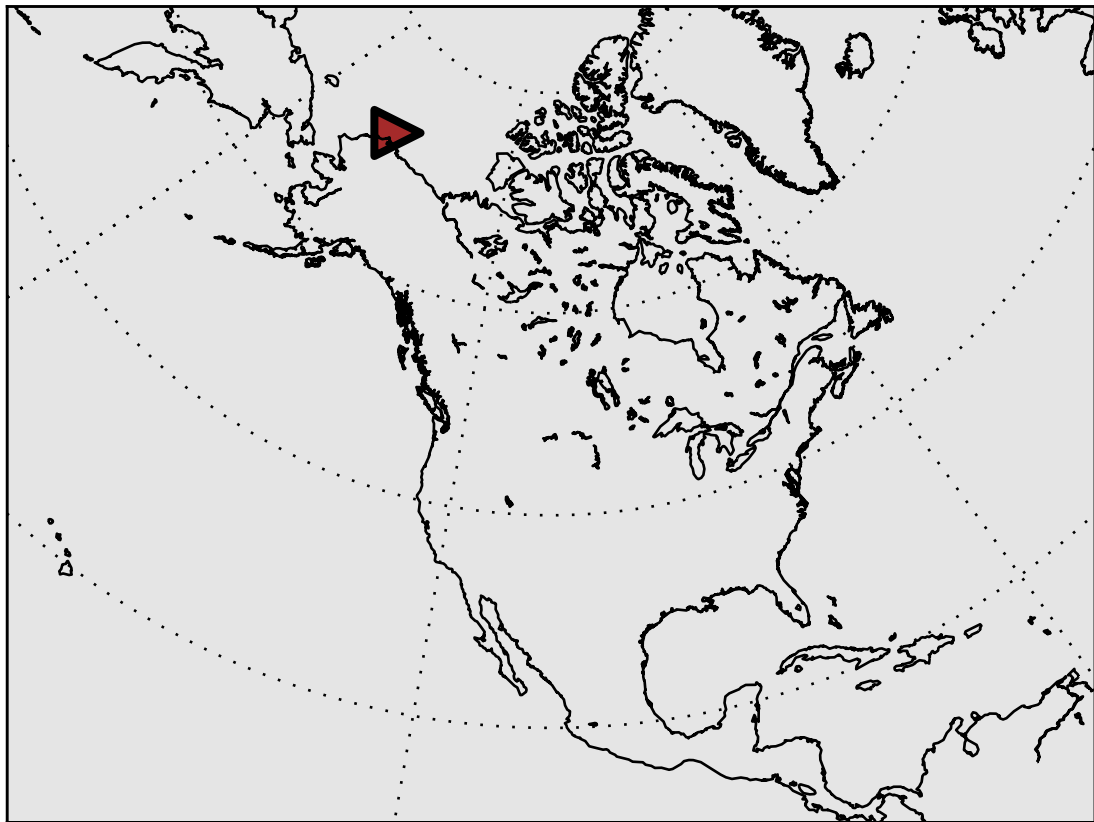

|                    |                                                                                              |
|--------------------|----------------------------------------------------------------------------------------------|
| Dataset name:      | GGC19.Farmer.2011                                                                            |
| Archive type:      | MarineSediment                                                                               |
| Proxy type:        | dinocyst                                                                                     |
| Variable name:     | temperature                                                                                  |
| Latitude ( ° N):   | 72.16                                                                                        |
| Longitude ( ° E):  | -155.51                                                                                      |
| Elevation (m):     | -369.0                                                                                       |
| Interp. variable:  | T                                                                                            |
| Interp. detail:    | sea@surface                                                                                  |
| Interp. season:    | summer+                                                                                      |
| Interp. direction: | positive                                                                                     |
| Pub. 1 title:      | Western Arctic Ocean temperature variability durin...                                        |
| Pub. 1 authors:    | Farmer, Jesse R.; Cronin, Thomas M.; de Vernal, An...                                        |
| Pub. 1 year:       | 2011                                                                                         |
| Pub. 1 DOI:        | 10.1029/2011GL049714                                                                         |
| Original data URL: | <a href="http://www.ncdc.noaa.gov/paleo/study/15444">www.ncdc.noaa.gov/paleo/study/15444</a> |

Proxy data and metadata  
MarineSediment | dinocyst | Station803.Bringue.2012 | WEB1da17ab5

Proxy time series: temperature

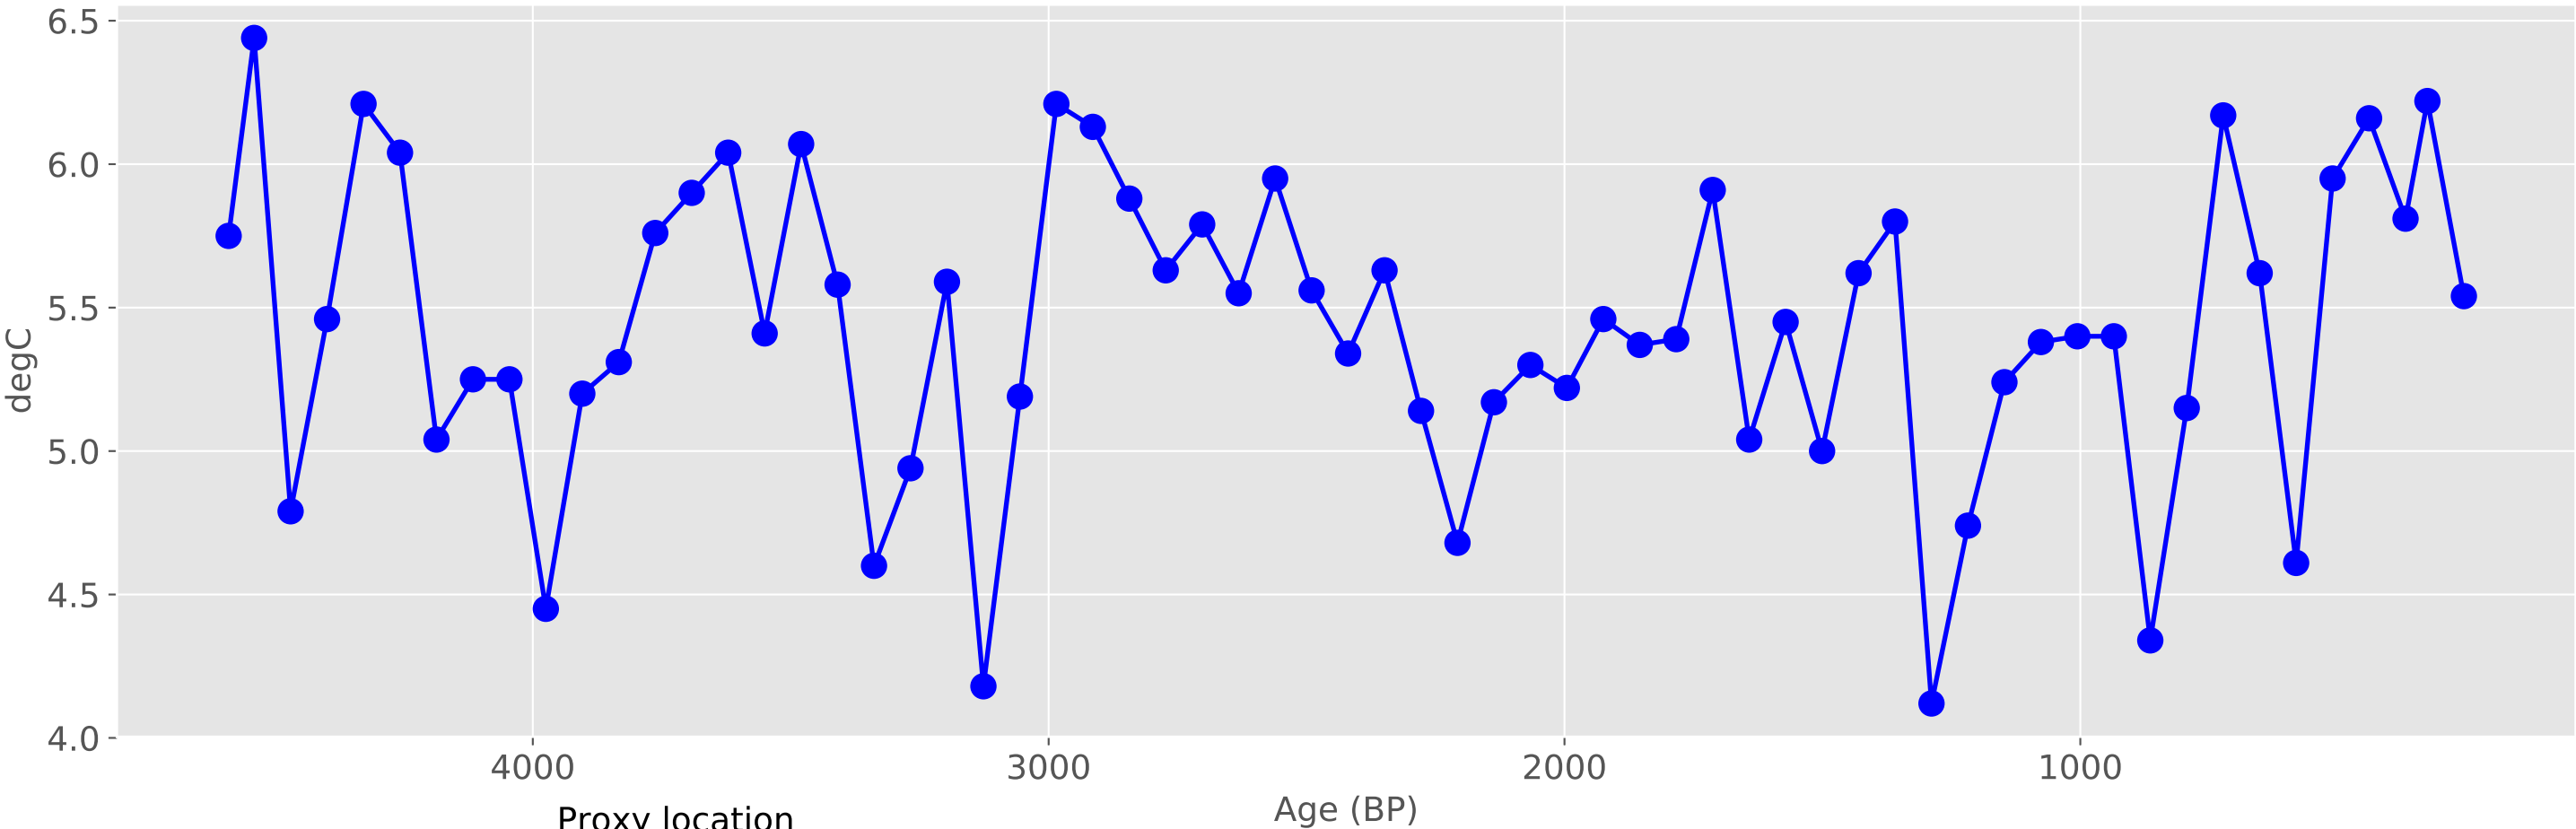

Proxy location  
(70.63 ° N, 135.88 ° W)

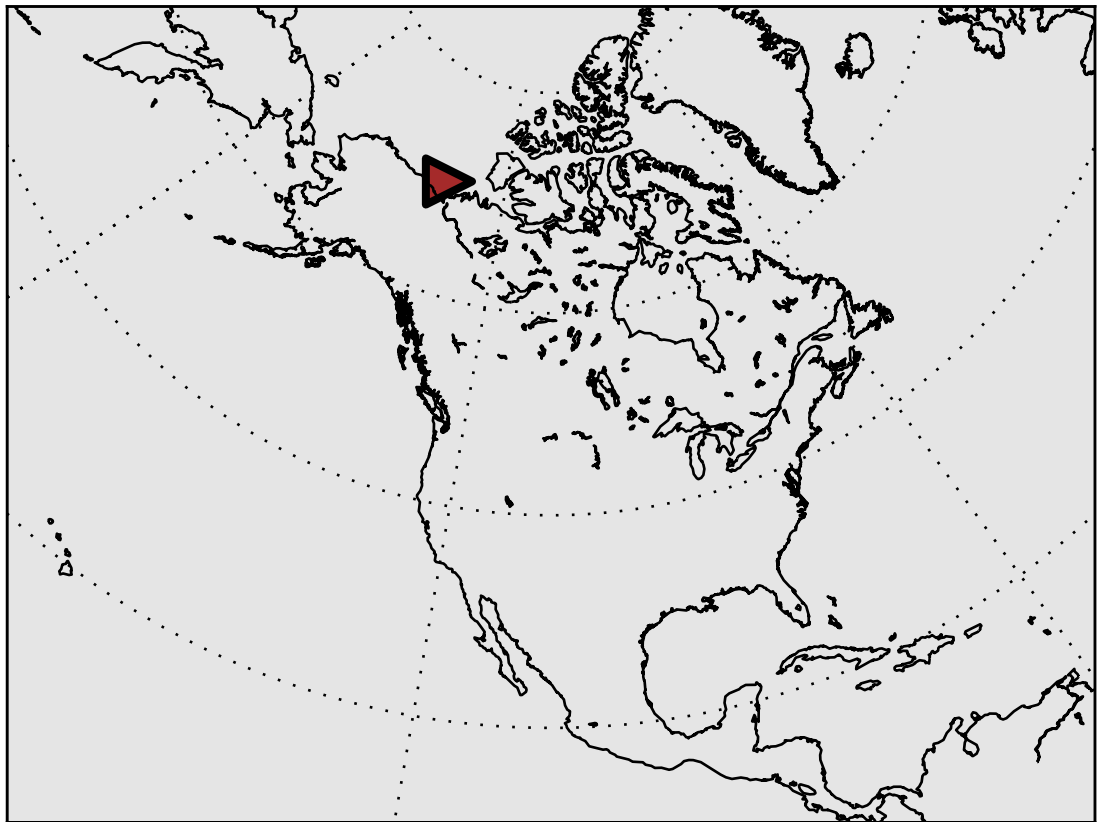

|                    |                                                       |
|--------------------|-------------------------------------------------------|
| Dataset name:      | Station803.Bringue.2012                               |
| Archive type:      | MarineSediment                                        |
| Proxy type:        | dinocyst                                              |
| Variable name:     | temperature                                           |
| Latitude ( ° N):   | 70.6328                                               |
| Longitude ( ° E):  | -135.8803                                             |
| Elevation (m):     | -218.0                                                |
| Interp. variable:  | T                                                     |
| Interp. detail:    | sea@surface                                           |
| Interp. season:    | summerOnly                                            |
| Interp. direction: | positive                                              |
| Pub. 1 title:      | Late Holocene paleoceanography and climate variabi... |
| Pub. 1 authors:    | Bringü, Manuel; Rochon, Andr                          |
| Pub. 1 year:       | 2012                                                  |
| Pub. 1 DOI:        | 10.1016/j.margeo.2011.11.004                          |
| Original data URL: | www.ncdc.noaa.gov/paleo/study/27910                   |

Proxy data and metadata

MarineSediment | dinocyst | Station803.Bringue.2012 | WEBd68d542b

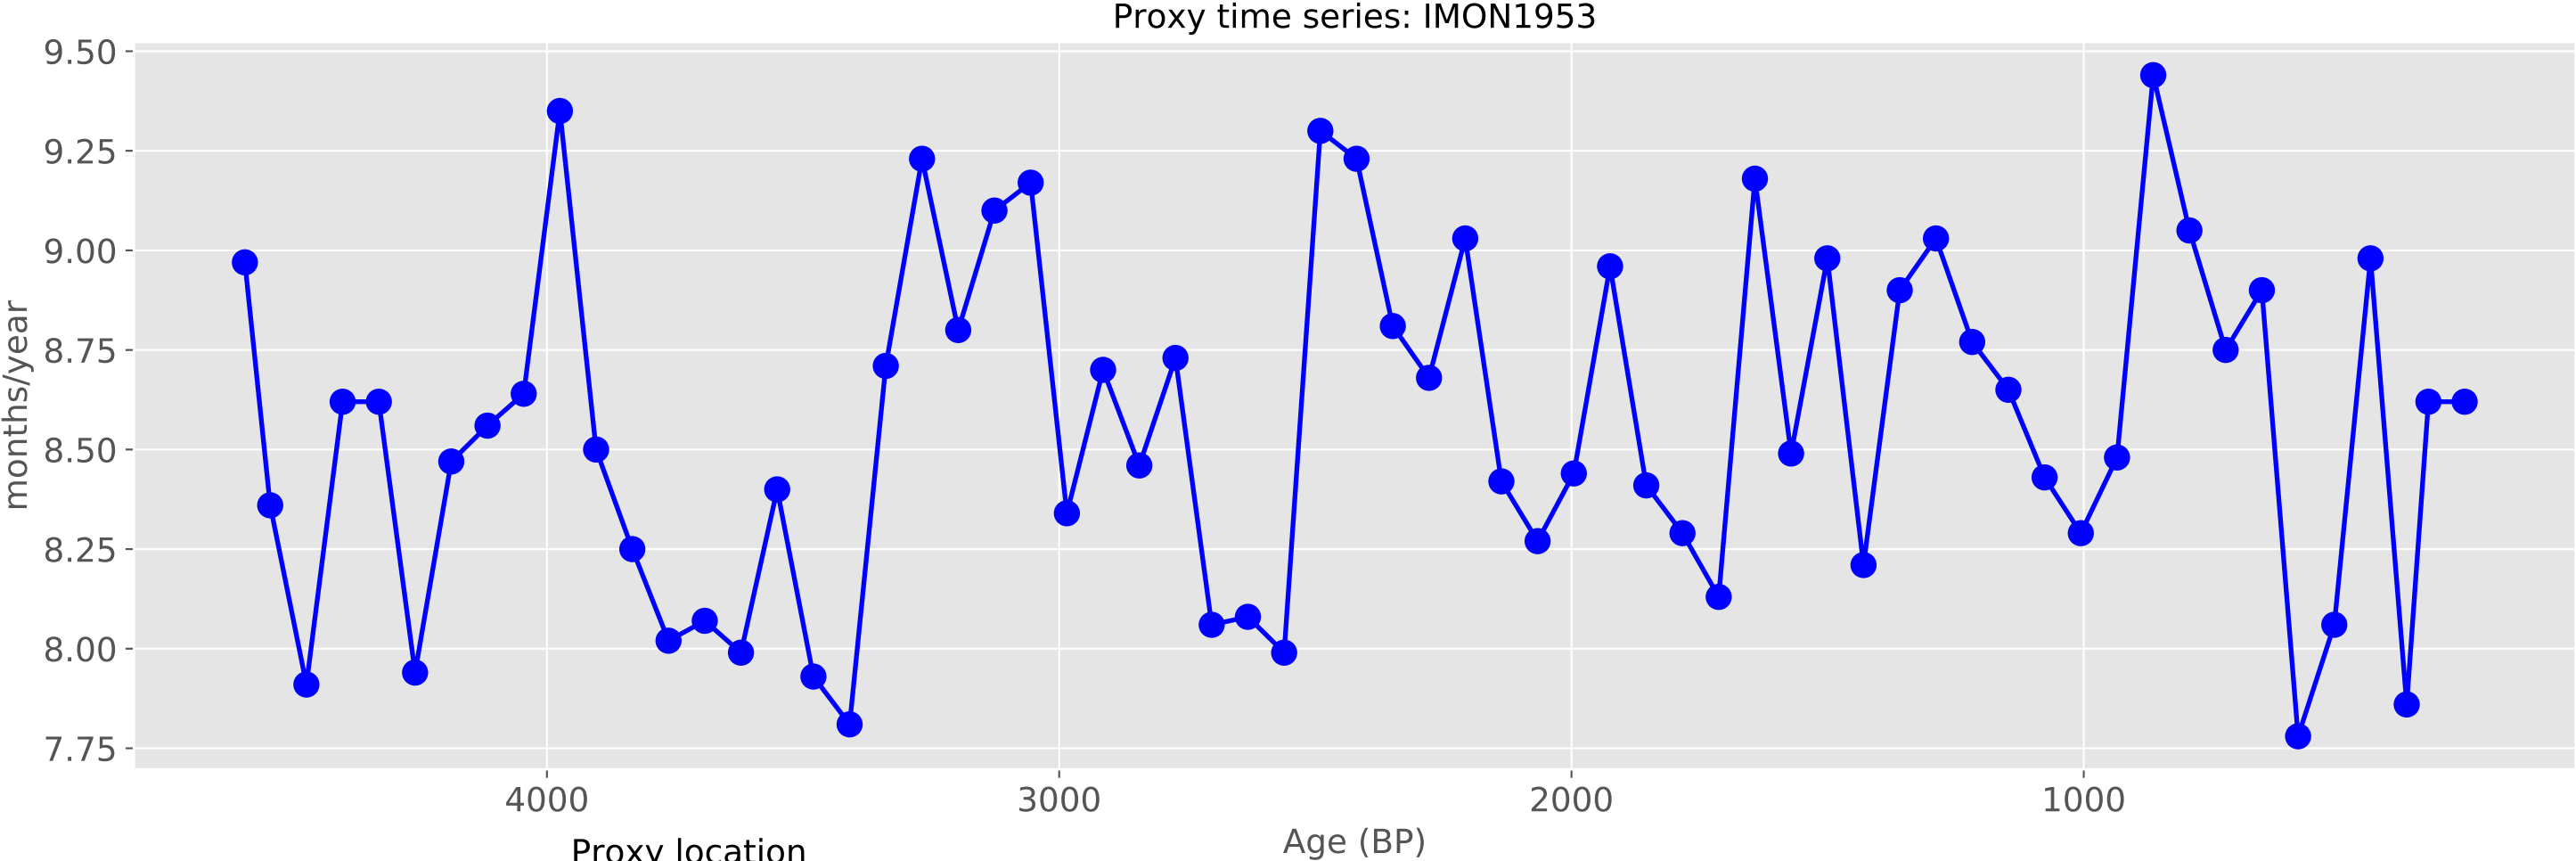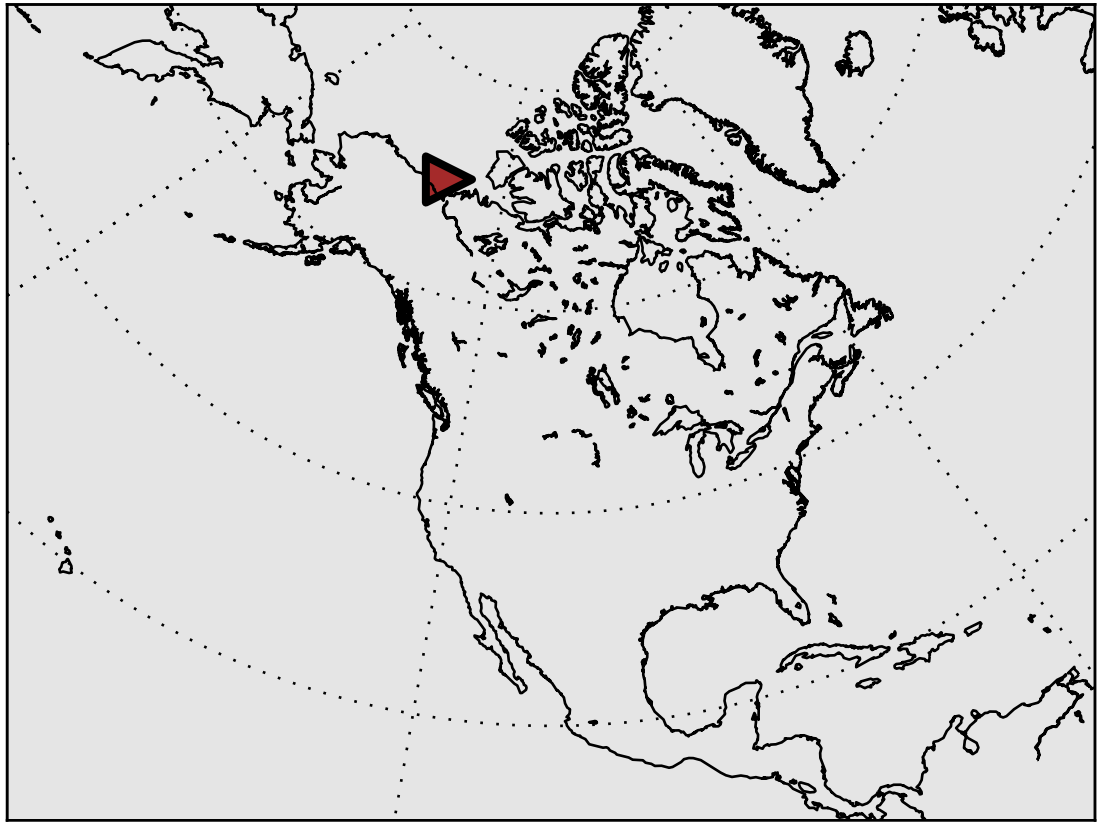

|                    |                                                       |
|--------------------|-------------------------------------------------------|
| Dataset name:      | Station803.Bringue.2012                               |
| Archive type:      | MarineSediment                                        |
| Proxy type:        | dinocyst                                              |
| Variable name:     | IMON1953                                              |
| Latitude ( ° N):   | 70.6328                                               |
| Longitude ( ° E):  | -135.8803                                             |
| Elevation (m):     | -218.0                                                |
| Interp. variable:  | ICE                                                   |
| Interp. detail:    | sea@surface                                           |
| Interp. season:    | annual                                                |
| Interp. direction: | positive                                              |
| Pub. 1 title:      | Late Holocene paleoceanography and climate variabi... |
| Pub. 1 authors:    | Bringu, Manuel; Rochon, Andr                          |
| Pub. 1 year:       | 2012                                                  |
| Pub. 1 DOI:        | 10.1016/j.margeo.2011.11.004                          |
| Original data URL: | www.ncdc.noaa.gov/paleo/study/27910                   |

Proxy data and metadata  
MarineSediment | foraminifera | MD02-2553.Poore.2009 | WEBd4917199

Proxy time series: G.sacculifer

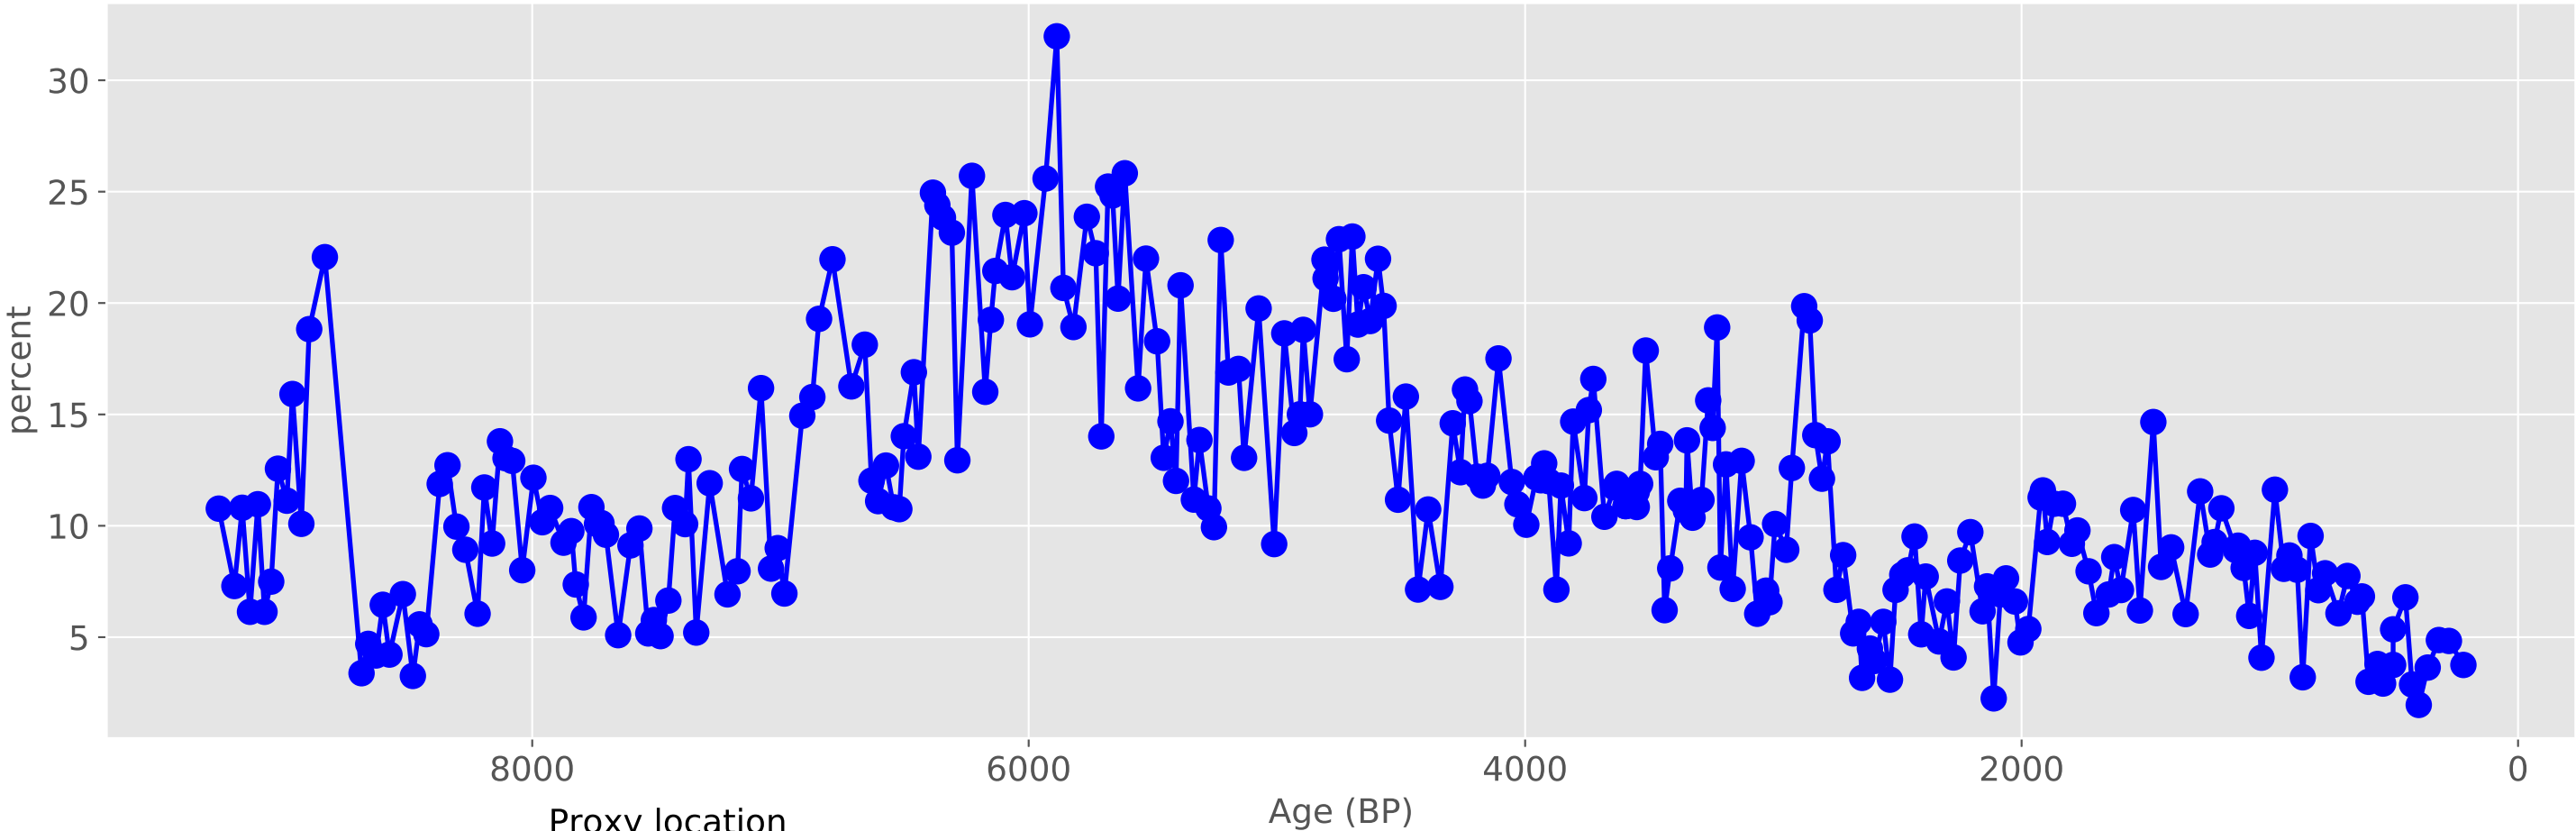

Proxy location  
(27.18 ° N, 91.42 ° W)

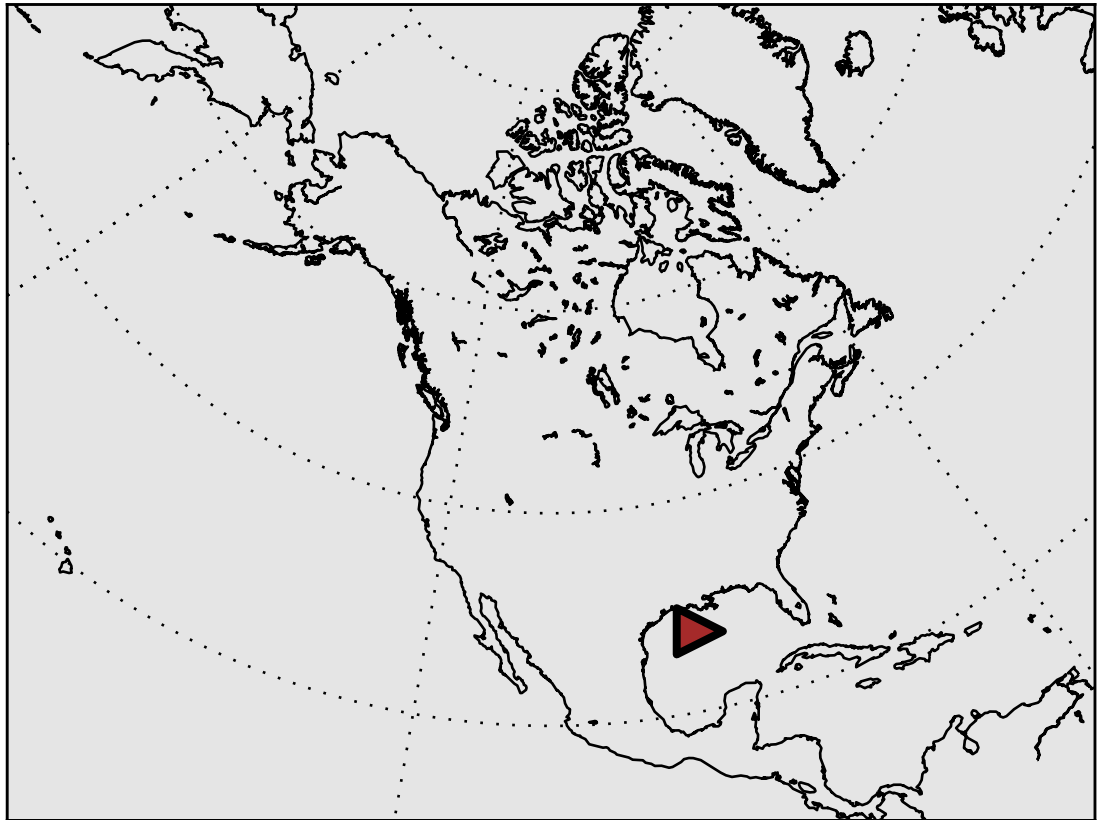

|                    |                                                       |
|--------------------|-------------------------------------------------------|
| Dataset name:      | MD02-2553.Poore.2009                                  |
| Archive type:      | MarineSediment                                        |
| Proxy type:        | foraminifera                                          |
| Variable name:     | G.sacculifer                                          |
| Latitude ( ° N):   | 27.1835                                               |
| Longitude ( ° E):  | -91.4167                                              |
| Elevation (m):     | -2259.0                                               |
| Interp. variable:  | P                                                     |
| Interp. detail:    | @surface                                              |
| Interp. season:    | summerOnly                                            |
| Interp. direction: | positive                                              |
| Pub. 1 title:      | Record of the North American southwest monsoon fro... |
| Pub. 1 authors:    | Poore, R.Z.;Pavich, M.J.;Grissino-Mayer, H.D.         |
| Pub. 1 year:       | 2005                                                  |
| Pub. 1 DOI:        | 10.1130/G21040.1                                      |
| Original data URL: | wNA                                                   |

Proxy data and metadata  
MarineSediment | foraminifera | RC12-10.Poore.2003 | WEBd5f320fe

Proxy time series: temperature

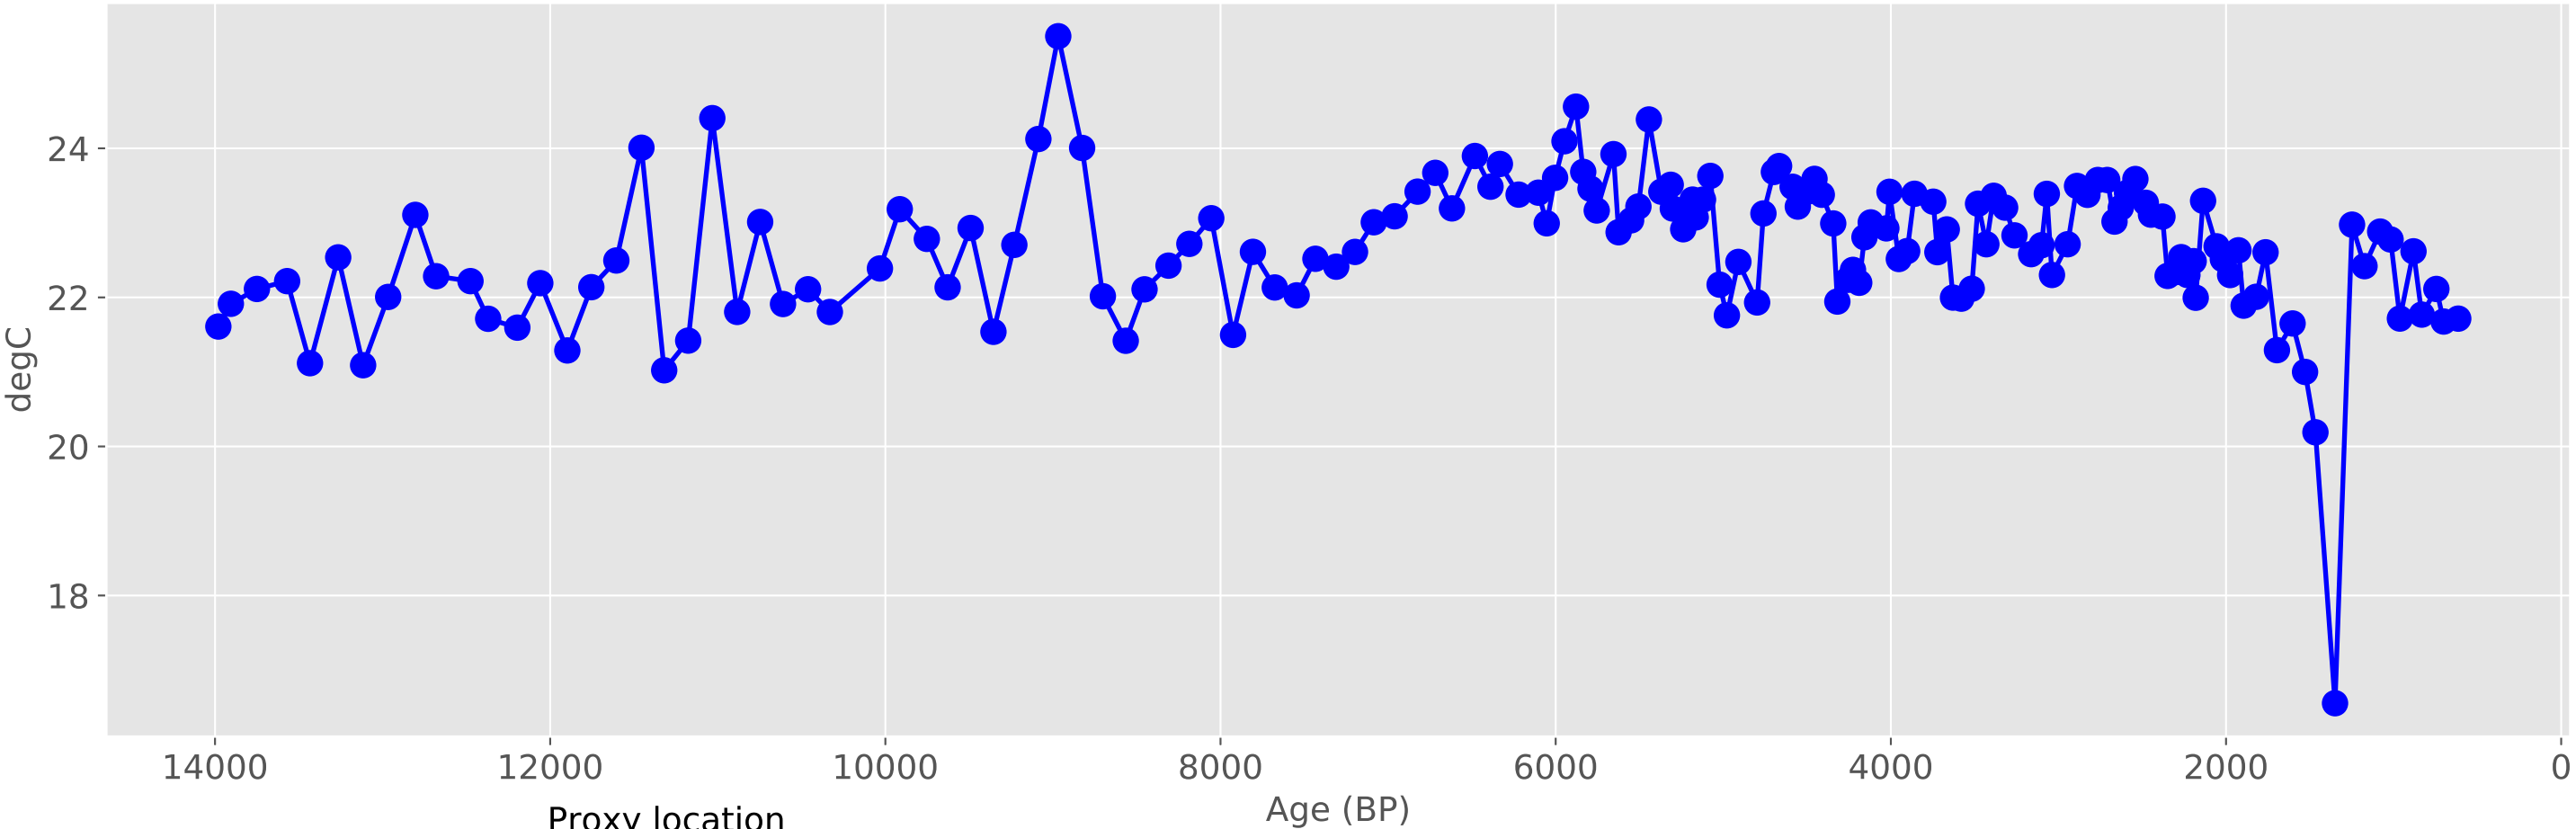

Proxy location  
(23.00° N, 95.53° W)

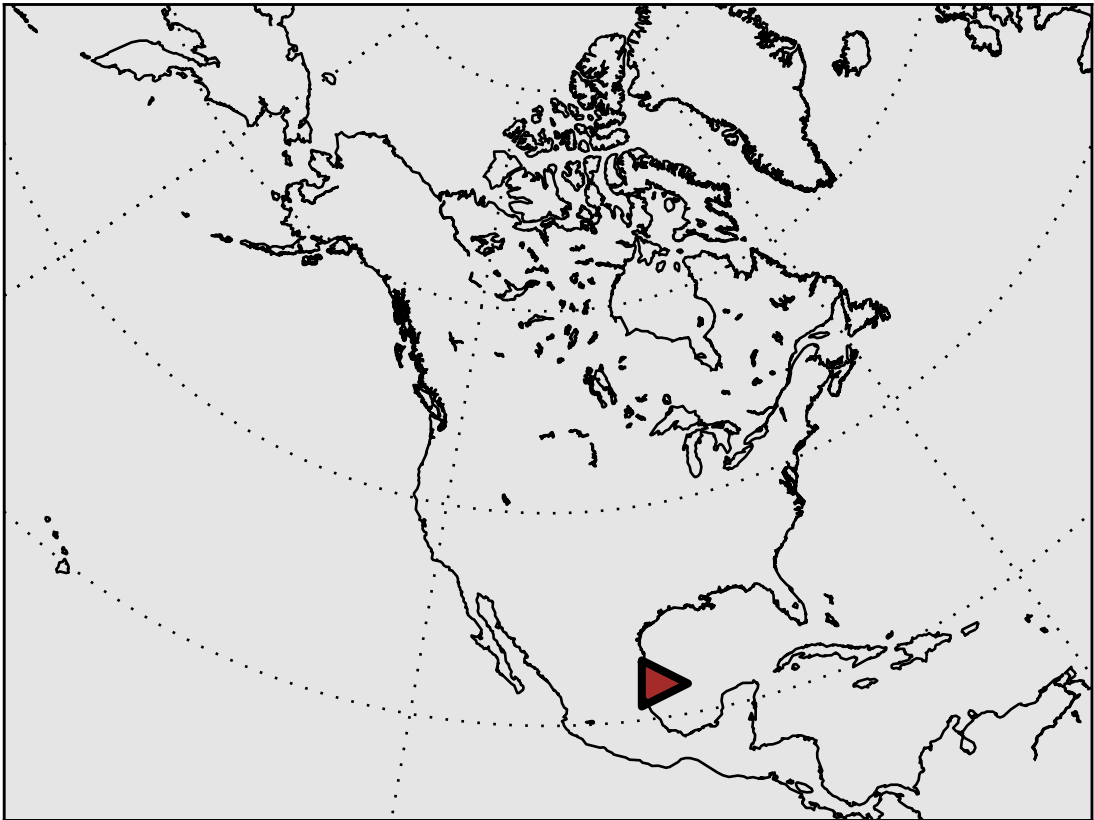

|                    |                                                                                              |
|--------------------|----------------------------------------------------------------------------------------------|
| Dataset name:      | RC12-10.Poore.2003                                                                           |
| Archive type:      | MarineSediment                                                                               |
| Proxy type:        | foraminifera                                                                                 |
| Variable name:     | temperature                                                                                  |
| Latitude (° N):    | 23.0                                                                                         |
| Longitude (° E):   | -95.53                                                                                       |
| Elevation (m):     | -3054.0                                                                                      |
| Interp. variable:  | T                                                                                            |
| Interp. detail:    | sea@surface                                                                                  |
| Interp. season:    | winterOnly                                                                                   |
| Interp. direction: | positive                                                                                     |
| Pub. 1 title:      | Millennial- to century-scale variability in Gulf o...                                        |
| Pub. 1 authors:    | Poore, R. Z.; Dowsett, H. J.; Verardo, S.; Quinn, ...                                        |
| Pub. 1 year:       | 2003                                                                                         |
| Pub. 1 DOI:        | 10.1029/2002PA000868                                                                         |
| Original data URL: | <a href="http://www.ncdc.noaa.gov/paleo/study/27330">www.ncdc.noaa.gov/paleo/study/27330</a> |

Proxy data and metadata

MarineSediment | GDGT | MD02\_2515.McClymont.2012 | T2L\_MD02\_2515\_tex86\_SST\_from\_tex86

Proxy time series: temperature

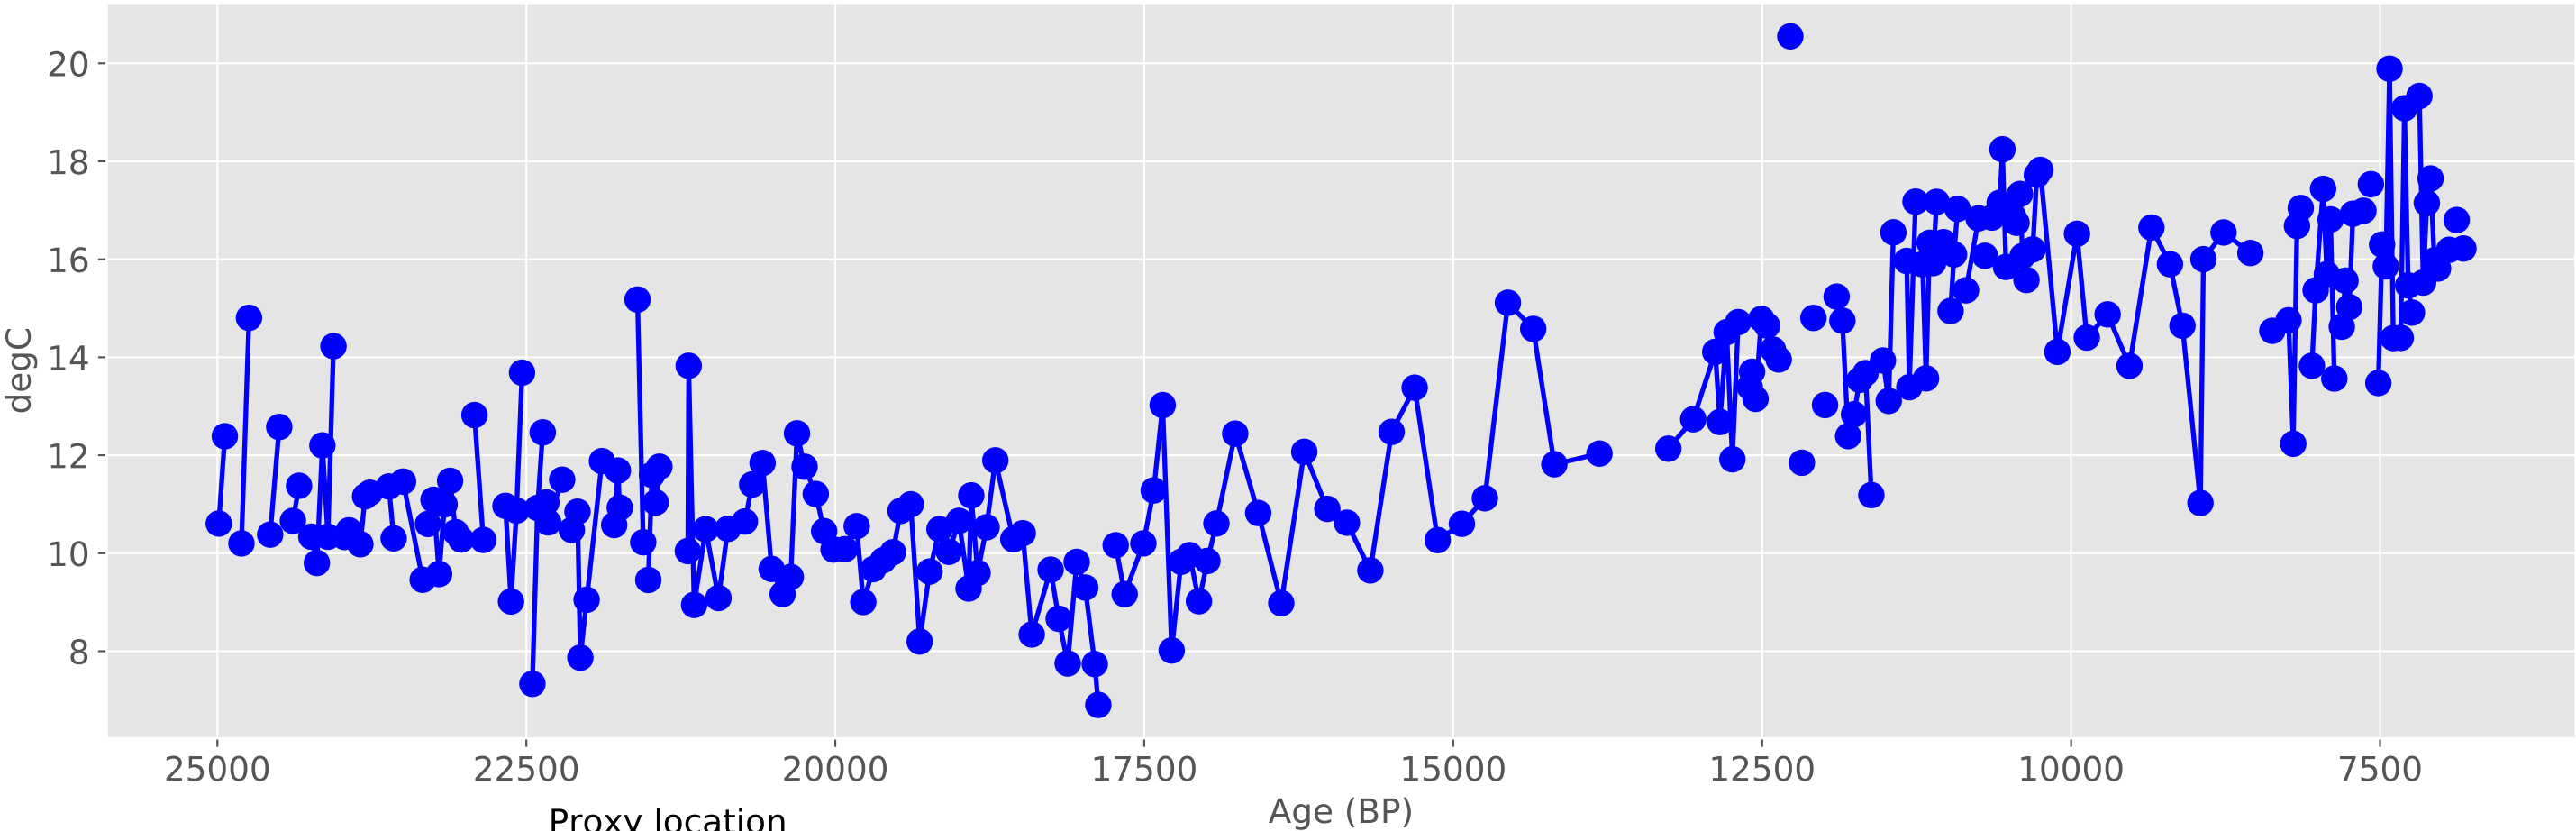

Proxy location  
(27.48 ° N, 112.07 ° W)

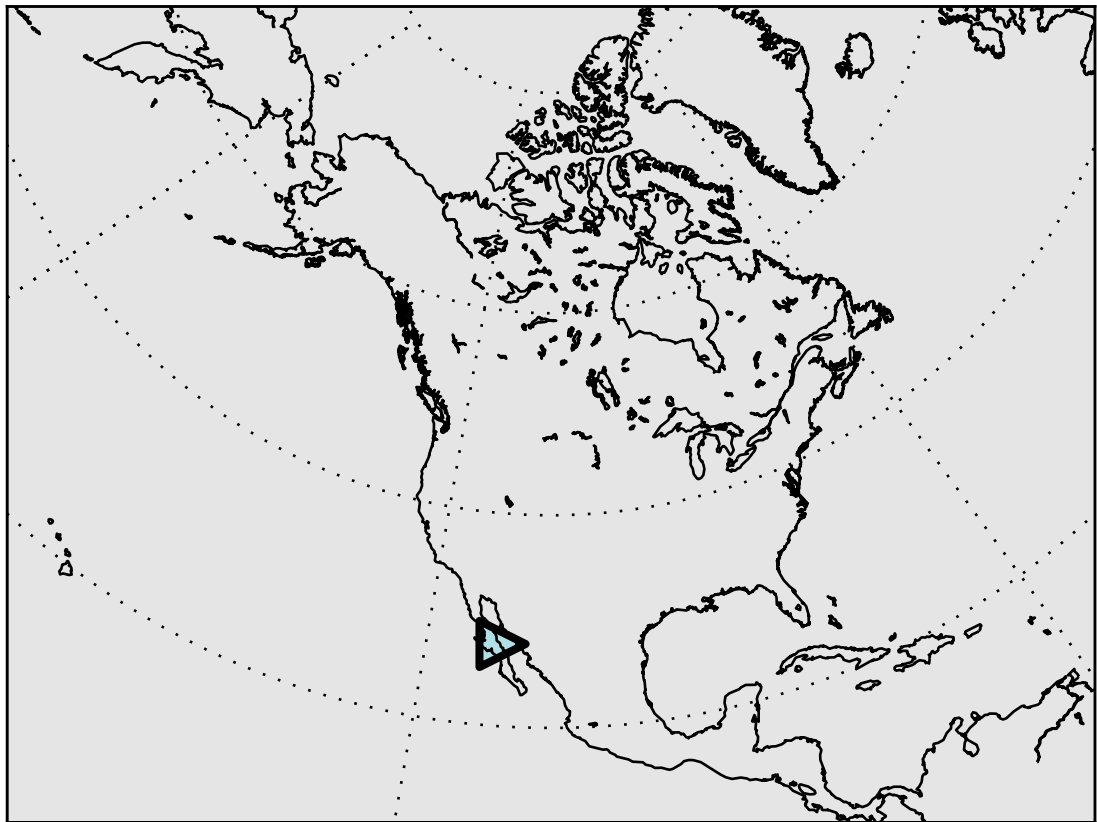

|                    |                                                       |
|--------------------|-------------------------------------------------------|
| Dataset name:      | MD02_2515.McClymont.2012                              |
| Archive type:      | MarineSediment                                        |
| Proxy type:        | GDGT                                                  |
| Variable name:     | temperature                                           |
| Latitude ( ° N):   | 27.4835                                               |
| Longitude ( ° E):  | -112.0743                                             |
| Elevation (m):     | -881.0                                                |
| Interp. variable:  | T                                                     |
| Interp. detail:    | sea@surface                                           |
| Interp. season:    | annual                                                |
| Interp. direction: | positive                                              |
| Pub. 1 title:      | Sea-surface temperature records of Termination 1 i... |
| Pub. 1 authors:    | McClymont, Erin L.; Ganeshram, Raja S.; Pichevin, ... |
| Pub. 1 year:       | 2012                                                  |
| Pub. 1 DOI:        | 10.1029/2011PA002226                                  |
| Original data URL: | 10.1594/PANGAEA.861260                                |



Proxy data and metadata  
MarineSediment | Mg/Ca | DJ6-93SF-6.McGann.2008 | WEB85a7302a

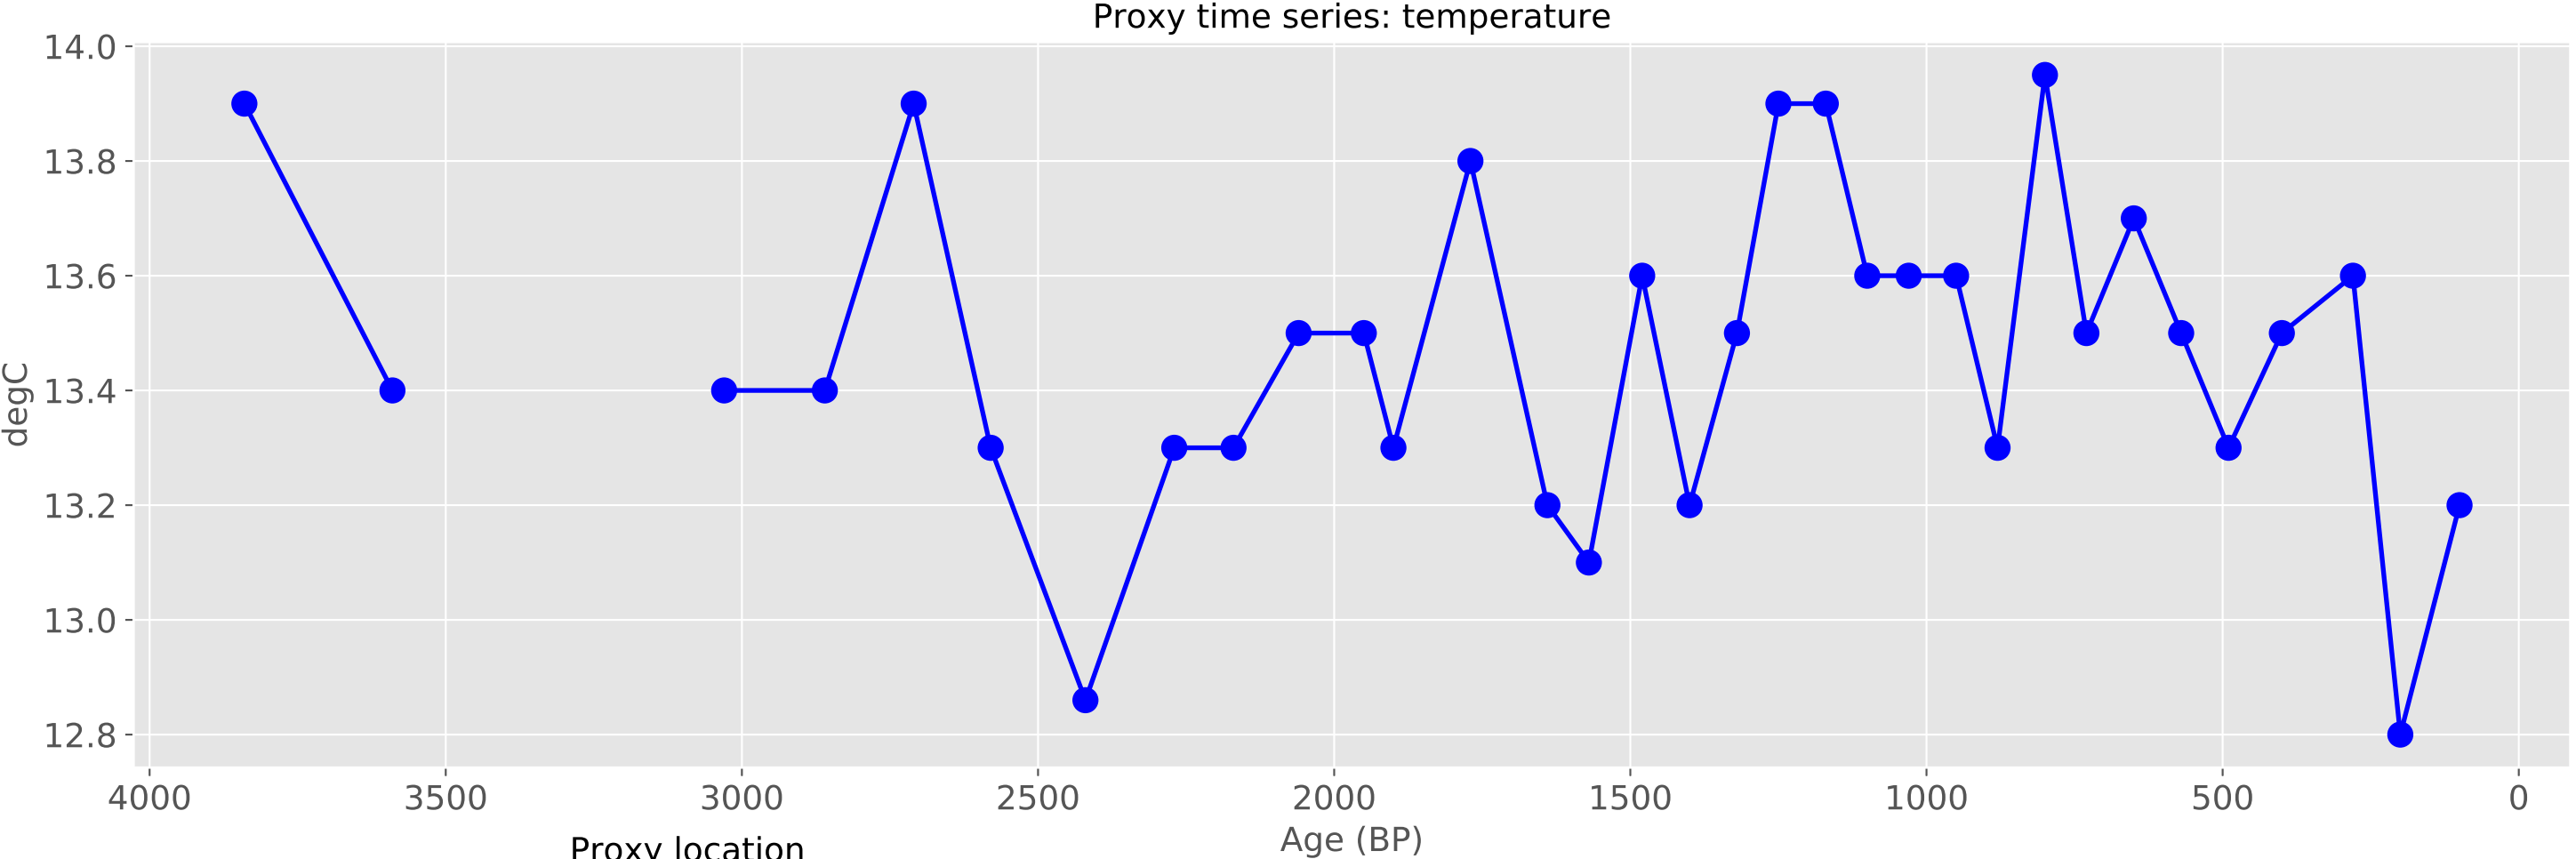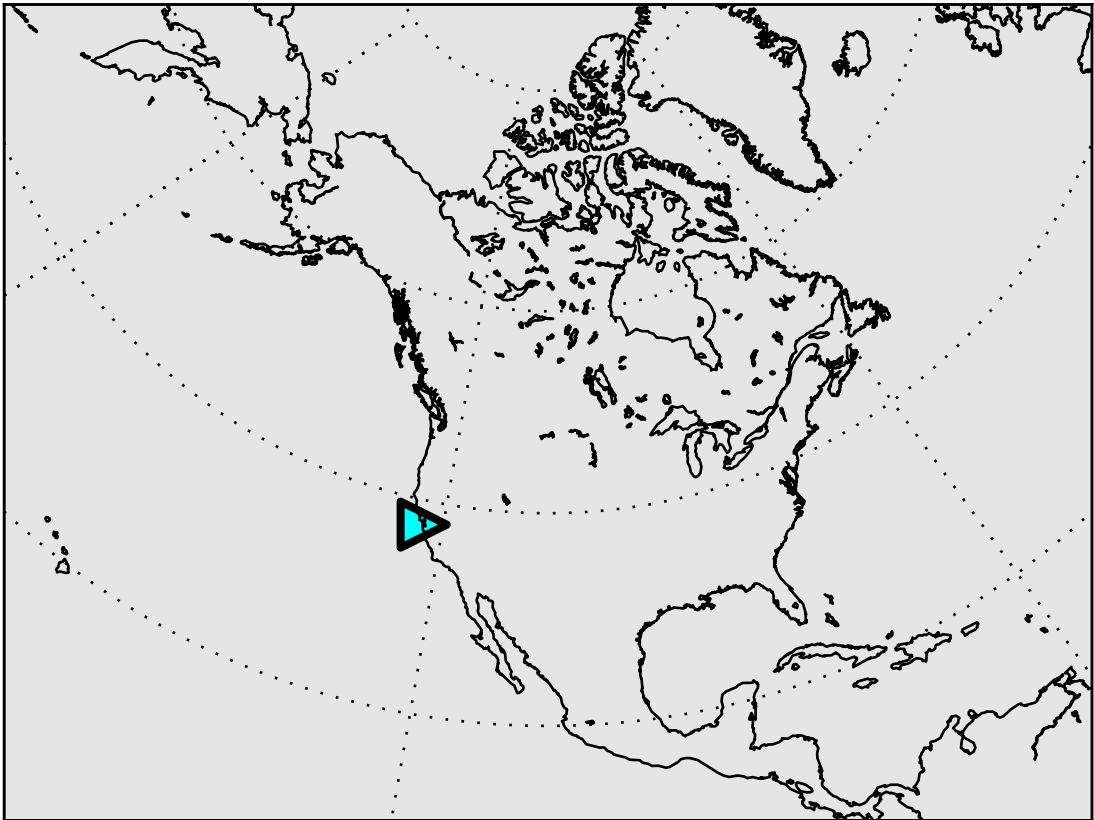

|                    |                                                       |
|--------------------|-------------------------------------------------------|
| Dataset name:      | DJ6-93SF-6.McGann.2008                                |
| Archive type:      | MarineSediment                                        |
| Proxy type:        | Mg/Ca                                                 |
| Variable name:     | temperature                                           |
| Latitude ( ° N):   | 37.63                                                 |
| Longitude ( ° E):  | -122.37                                               |
| Elevation (m):     | -4.0                                                  |
| Interp. variable:  | T                                                     |
| Interp. detail:    | sea@surface                                           |
| Interp. season:    | annual                                                |
| Interp. direction: | positive                                              |
| Pub. 1 title:      | High-Resolution Foraminiferal, Isotopic, and Trace... |
| Pub. 1 authors:    | McGann, Mary                                          |
| Pub. 1 year:       | 2008                                                  |
| Pub. 1 DOI:        | 10.2112/08A-0003.1                                    |
| Original data URL: | wNAm                                                  |

Proxy data and metadata

MarineSediment | Mg/Ca | EN32\_PC6.Flower.2004 | T2L\_EN32\_PC6\_mgca\_ruber\_SST\_from\_mgca\_ru...

Proxy time series: temperature

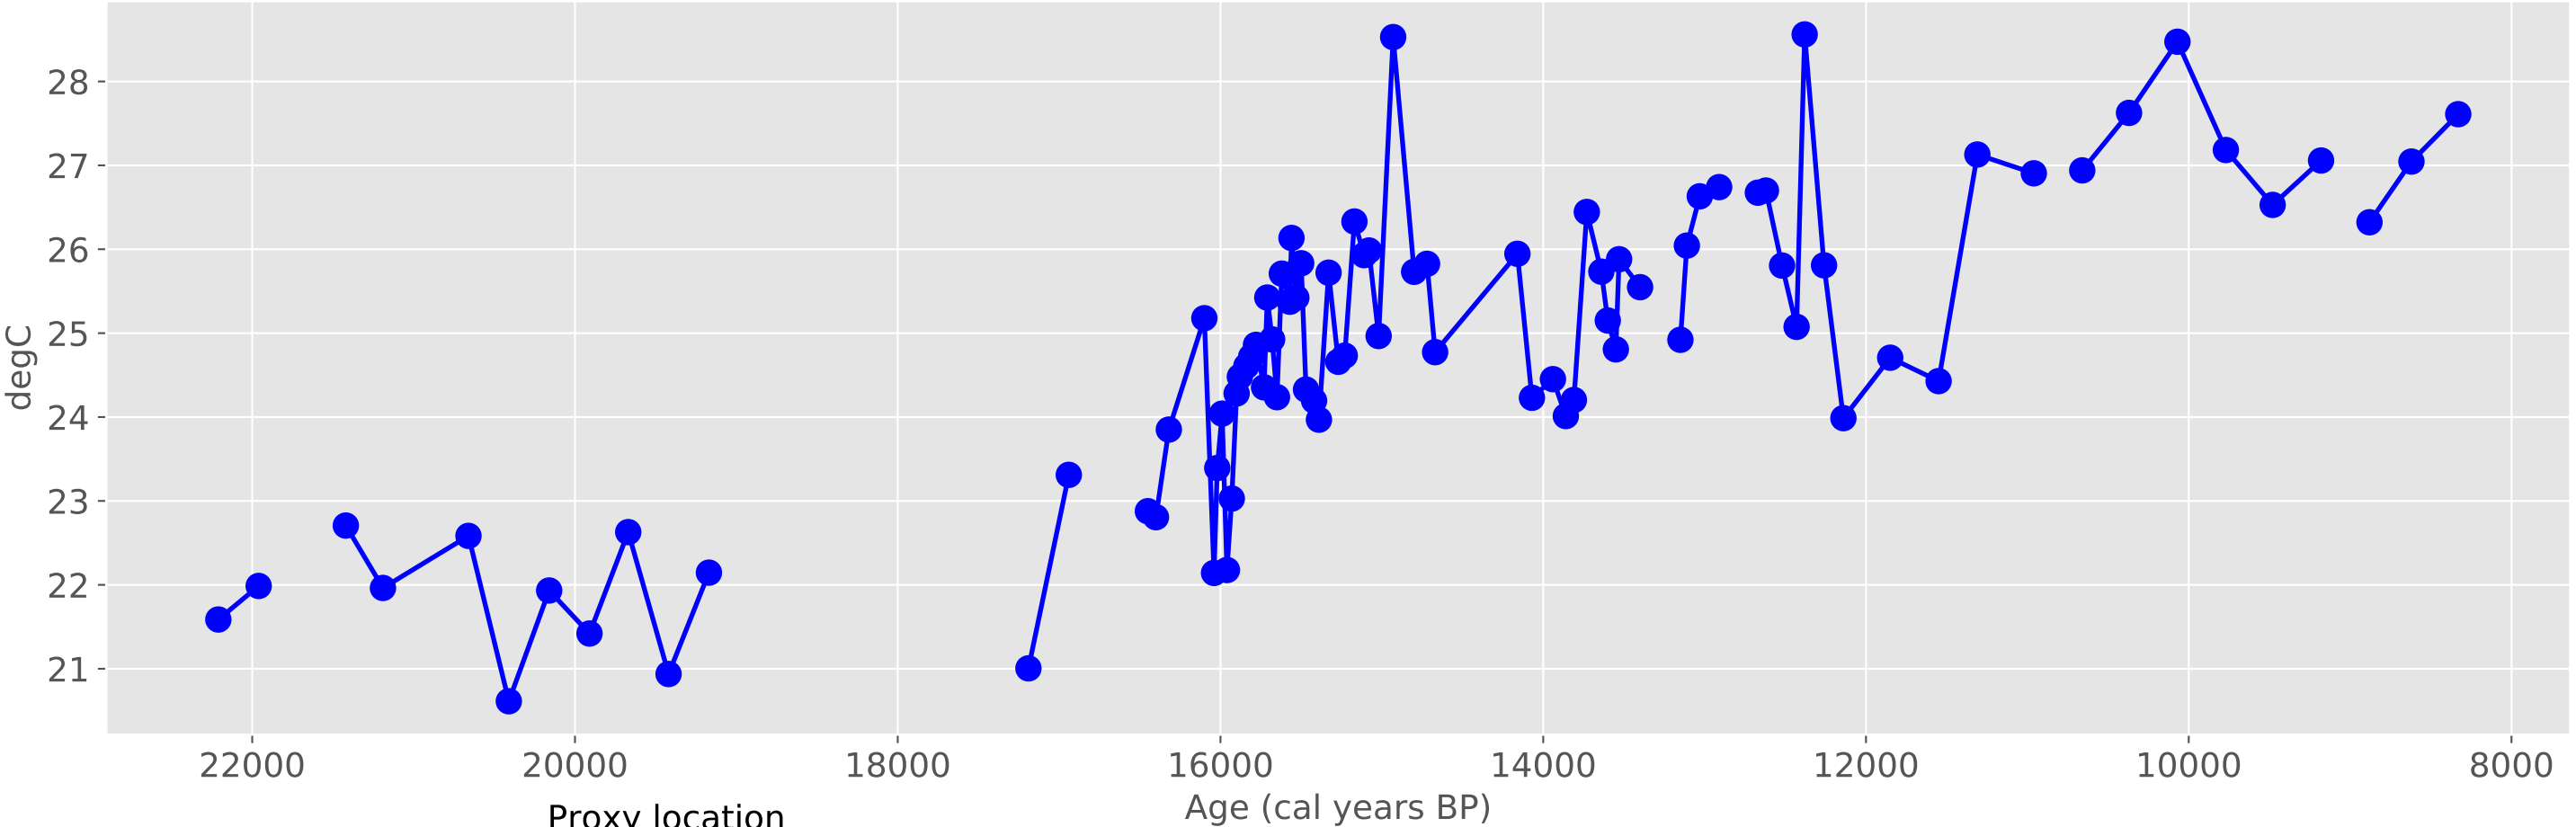

Proxy location  
(26.95 ° N, 91.35 ° W)

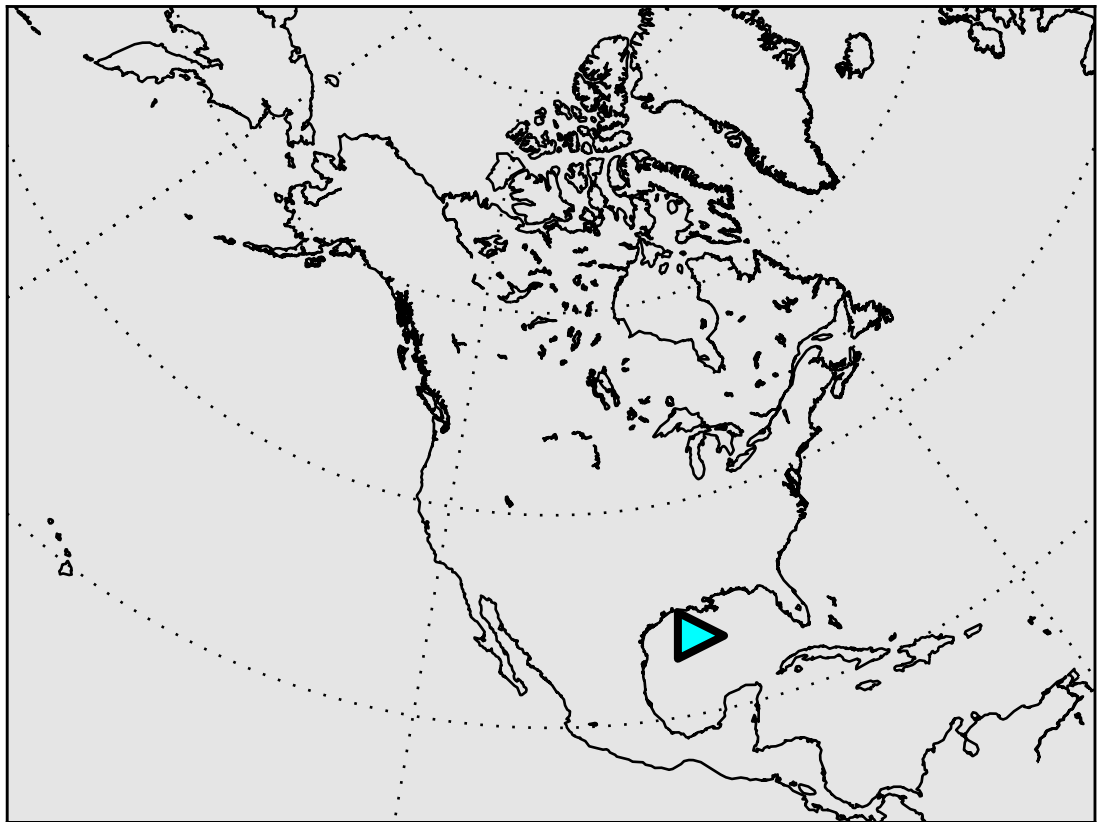

|                    |                                                                                              |
|--------------------|----------------------------------------------------------------------------------------------|
| Dataset name:      | EN32_PC6.Flower.2004                                                                         |
| Archive type:      | MarineSediment                                                                               |
| Proxy type:        | Mg/Ca                                                                                        |
| Variable name:     | temperature                                                                                  |
| Latitude ( ° N):   | 26.946                                                                                       |
| Longitude ( ° E):  | -91.35                                                                                       |
| Elevation (m):     | -2280.0                                                                                      |
| Interp. variable:  | T                                                                                            |
| Interp. detail:    | sea@surface                                                                                  |
| Interp. season:    | annual                                                                                       |
| Interp. direction: | positive                                                                                     |
| Pub. 1 title:      | Phasing of deglacial warming and Laurentide Ice Sh...                                        |
| Pub. 1 authors:    | Flower, Benjamin P.; Hastings, David W.; Hill, Hea...                                        |
| Pub. 1 year:       | 2004                                                                                         |
| Pub. 1 DOI:        | 10.1130/G20604.1                                                                             |
| Original data URL: | <a href="http://www.ncdc.noaa.gov/paleo/study/27330">www.ncdc.noaa.gov/paleo/study/27330</a> |

Proxy data and metadata

MarineSediment | Mg/Ca | KNR159\_JPC26.Antonarakou.2015 | T2L\_KNR159\_JPC26\_mgca\_ruber\_lato\_SST\_fro...

Proxy time series: temperature

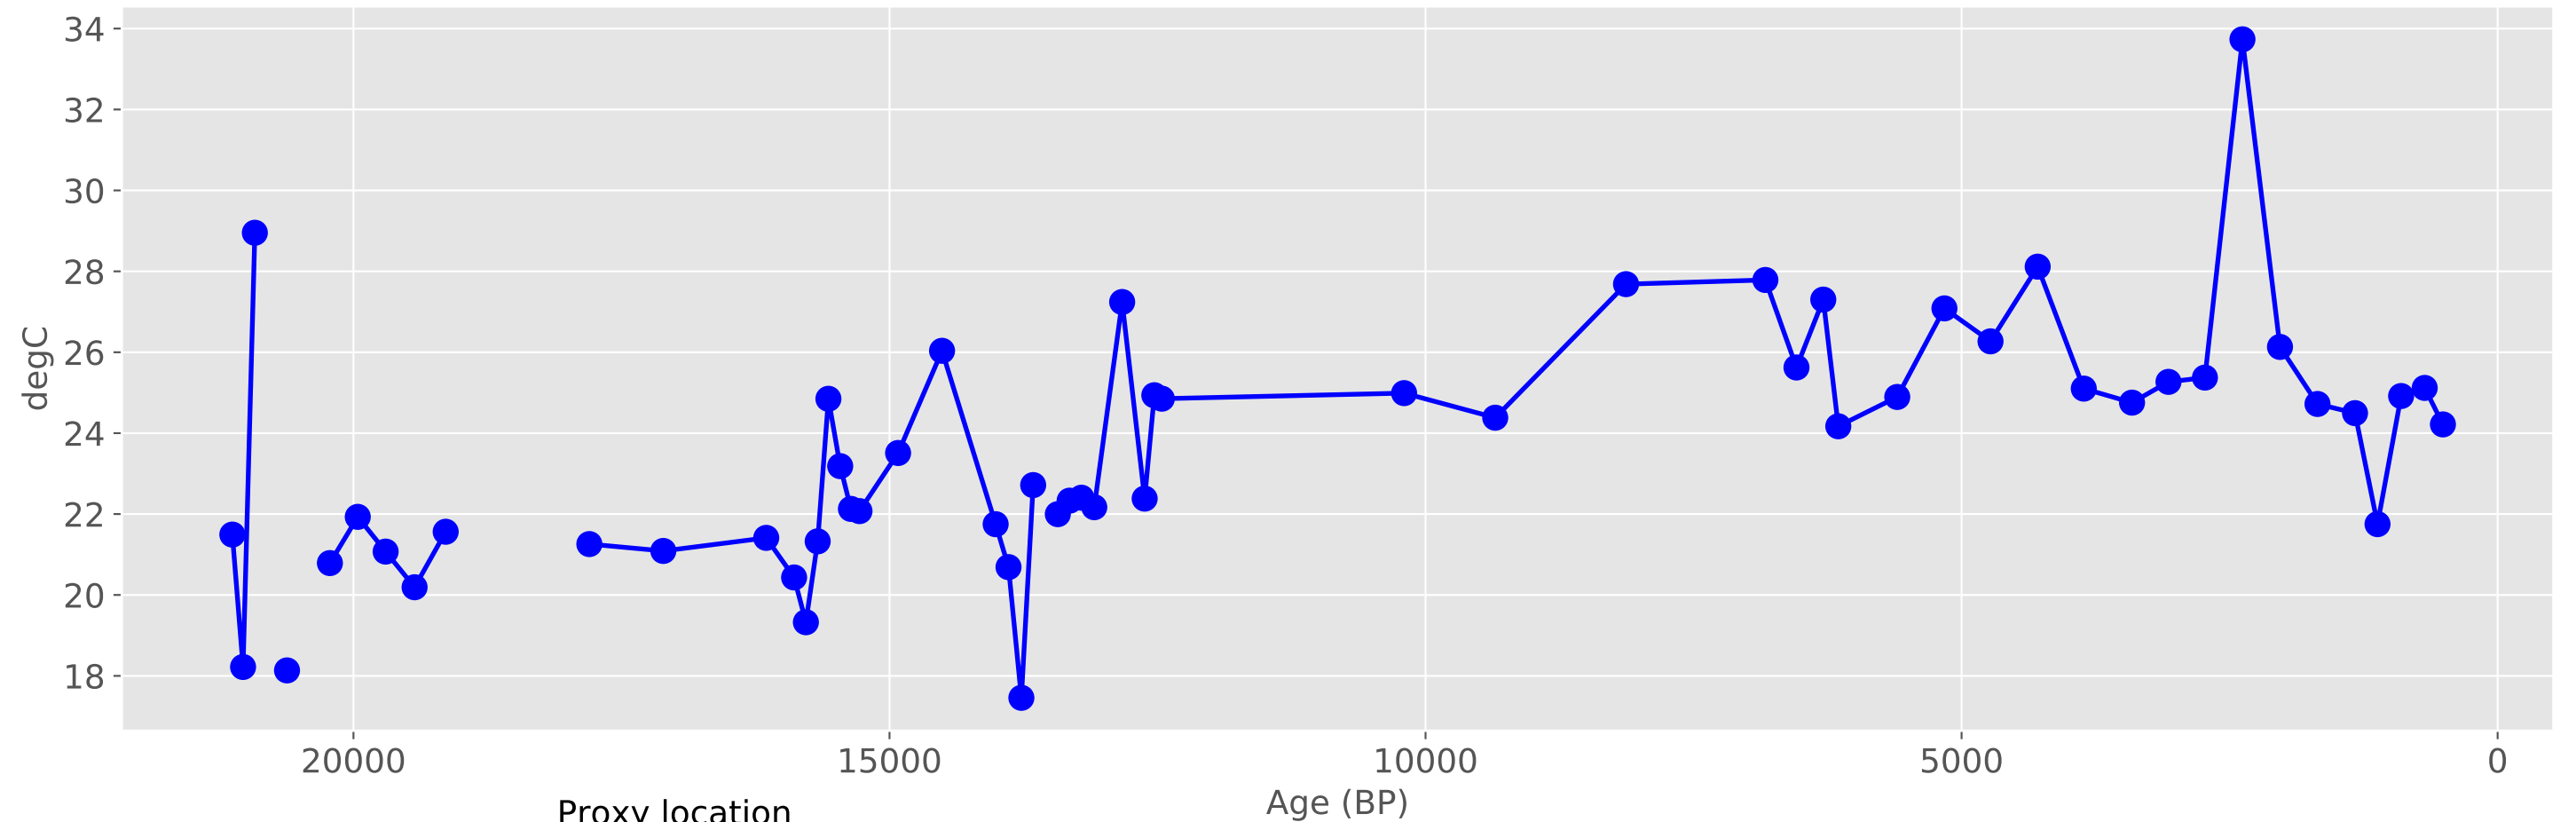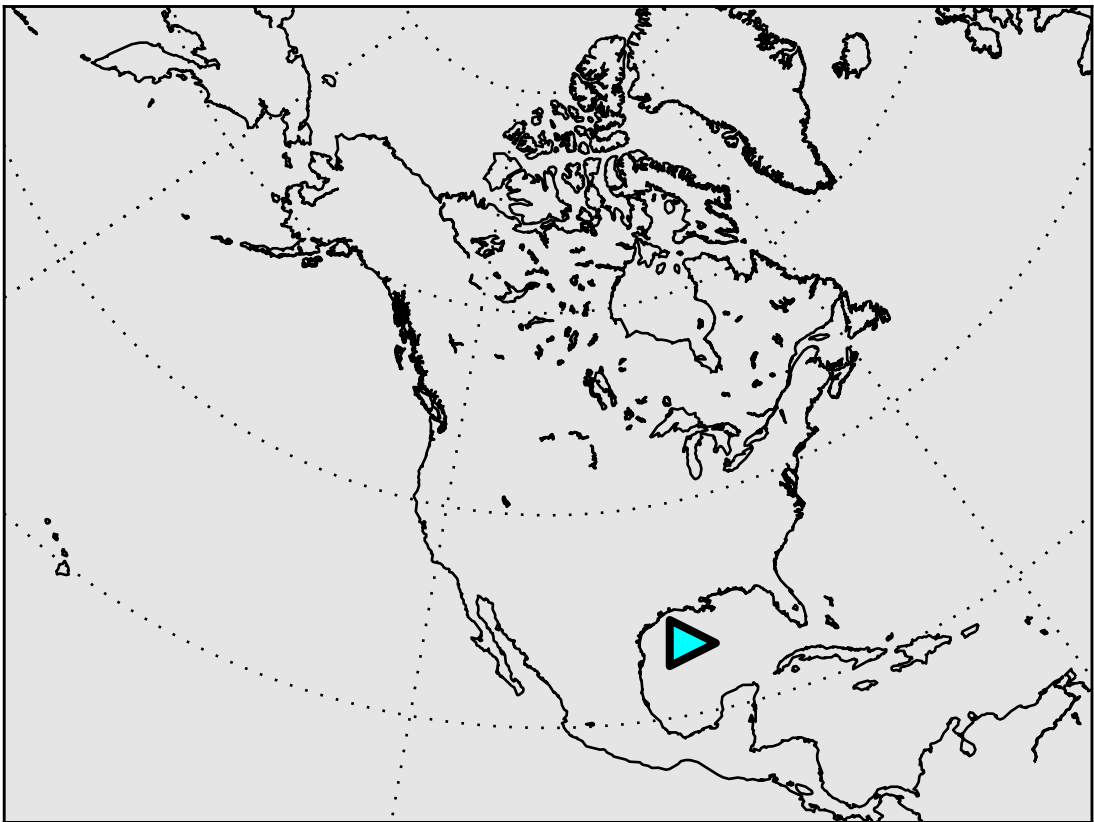

|                    |                                                       |
|--------------------|-------------------------------------------------------|
| Dataset name:      | KNR159_JPC26.Antonarakou.2015                         |
| Archive type:      | MarineSediment                                        |
| Proxy type:        | Mg/Ca                                                 |
| Variable name:     | temperature                                           |
| Latitude ( ° N):   | 26.374                                                |
| Longitude ( ° E):  | -92.027                                               |
| Elevation (m):     | -1995.0                                               |
| Interp. variable:  | T                                                     |
| Interp. detail:    | sea@surface                                           |
| Interp. season:    | annual                                                |
| Interp. direction: | positive                                              |
| Pub. 1 title:      | Biotic and geochemical ( 18 O, 13 C, Mg/Ca, B...      |
| Pub. 1 authors:    | Antonarakou, A.; Kontakiotis, G.; Mortyn, P.G.; Dr... |
| Pub. 1 year:       | 2015                                                  |
| Pub. 1 DOI:        | 10.1016/j.gca.2015.08.003                             |
| Original data URL: | www.ncdc.noaa.gov/paleo/study/27330                   |

Proxy data and metadata

MarineSediment | Mg/Ca | KNR159\_JPC26.Antonarakou.2015 | T2L\_KNR159\_JPC26\_mgca\_ruber\_stricto\_SST\_...

Proxy time series: temperature

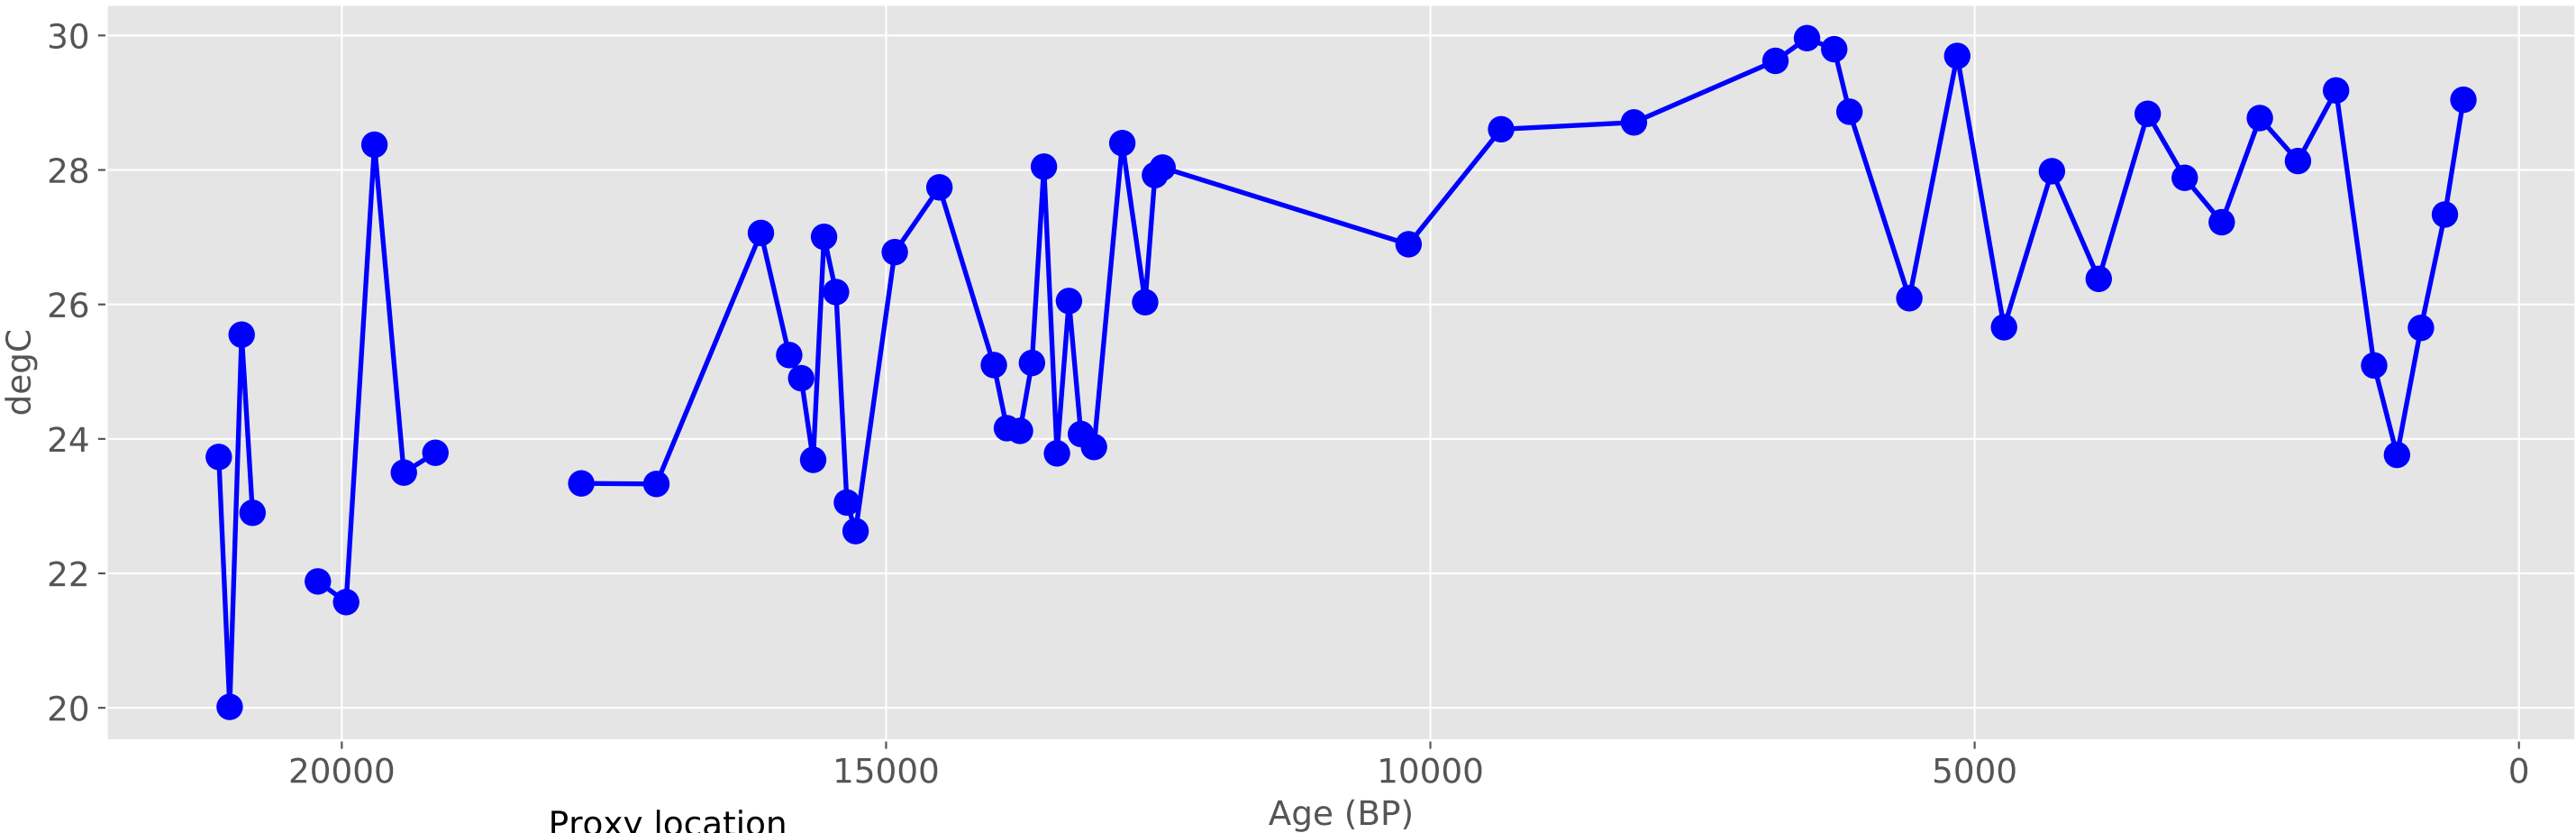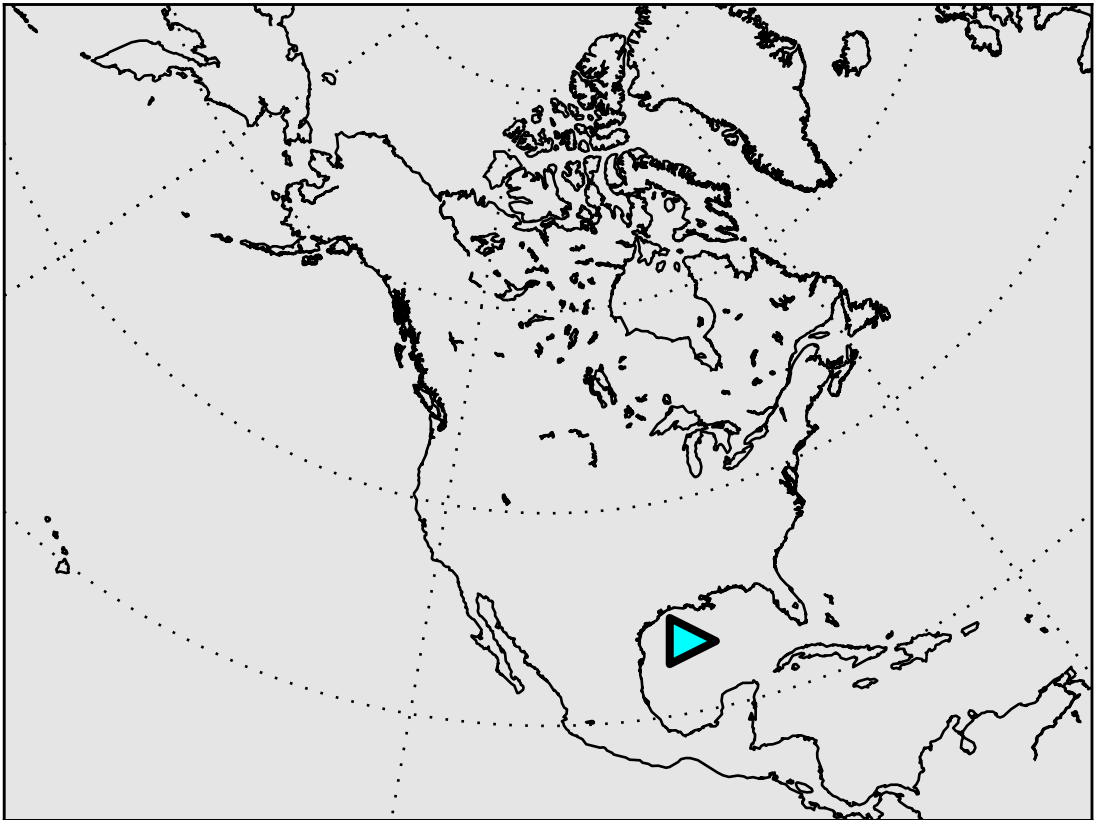

|                    |                                                       |
|--------------------|-------------------------------------------------------|
| Dataset name:      | KNR159_JPC26.Antonarakou.2015                         |
| Archive type:      | MarineSediment                                        |
| Proxy type:        | Mg/Ca                                                 |
| Variable name:     | temperature                                           |
| Latitude ( ° N):   | 26.374                                                |
| Longitude ( ° E):  | -92.027                                               |
| Elevation (m):     | -1995.0                                               |
| Interp. variable:  | T                                                     |
| Interp. detail:    | sea@surface                                           |
| Interp. season:    | annual                                                |
| Interp. direction: | positive                                              |
| Pub. 1 title:      | Biotic and geochemical ( 18 O, 13 C, Mg/Ca, B...      |
| Pub. 1 authors:    | Antonarakou, A.; Kontakiotis, G.; Mortyn, P.G.; Dr... |
| Pub. 1 year:       | 2015                                                  |
| Pub. 1 DOI:        | 10.1016/j.gca.2015.08.003                             |
| Original data URL: | www.ncdc.noaa.gov/paleo/study/27330                   |

Proxy data and metadata

MarineSediment | Mg/Ca | MV99\_PC14.Marchitto.2010 | T2L\_MV99\_PC14\_mgca\_bulloides\_SST\_from\_mg...

Proxy time series: temperature

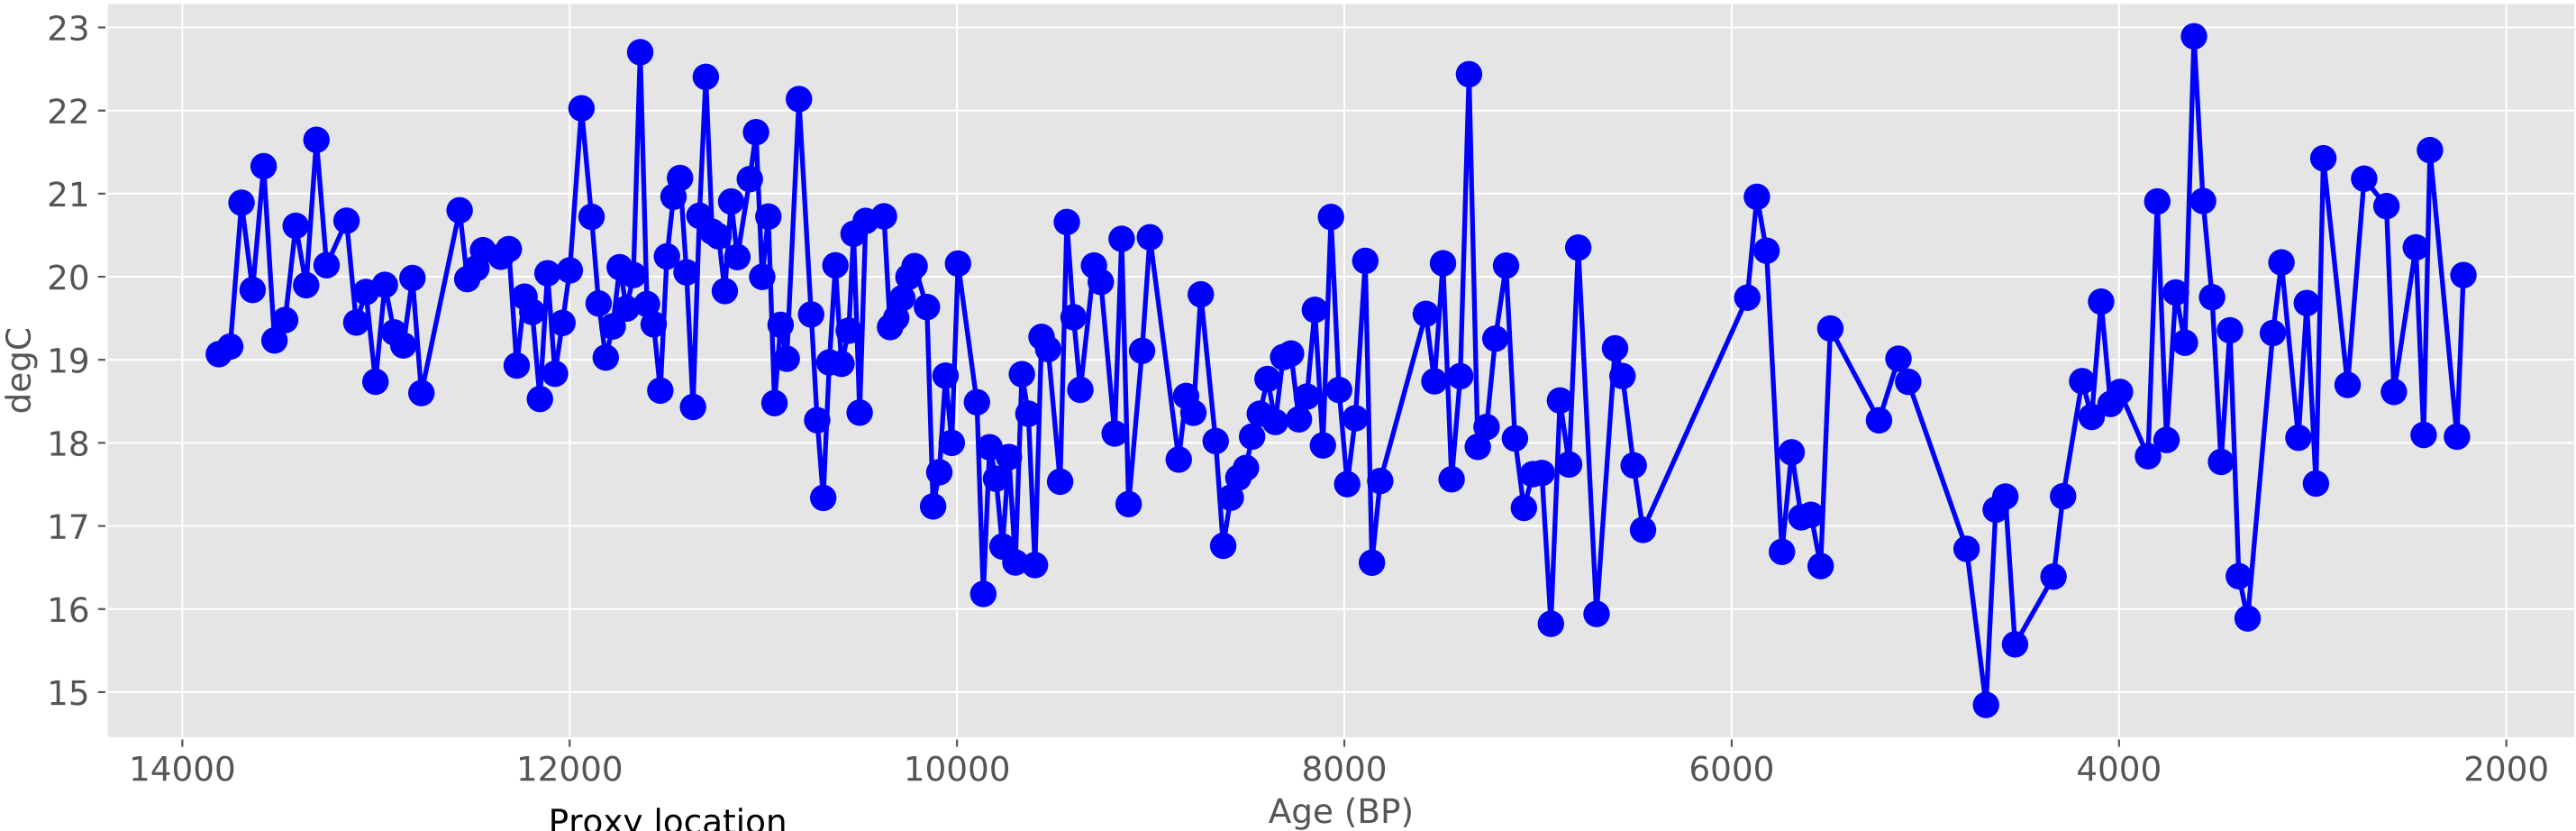

Proxy location  
(25.20 ° N, 112.72 ° W)

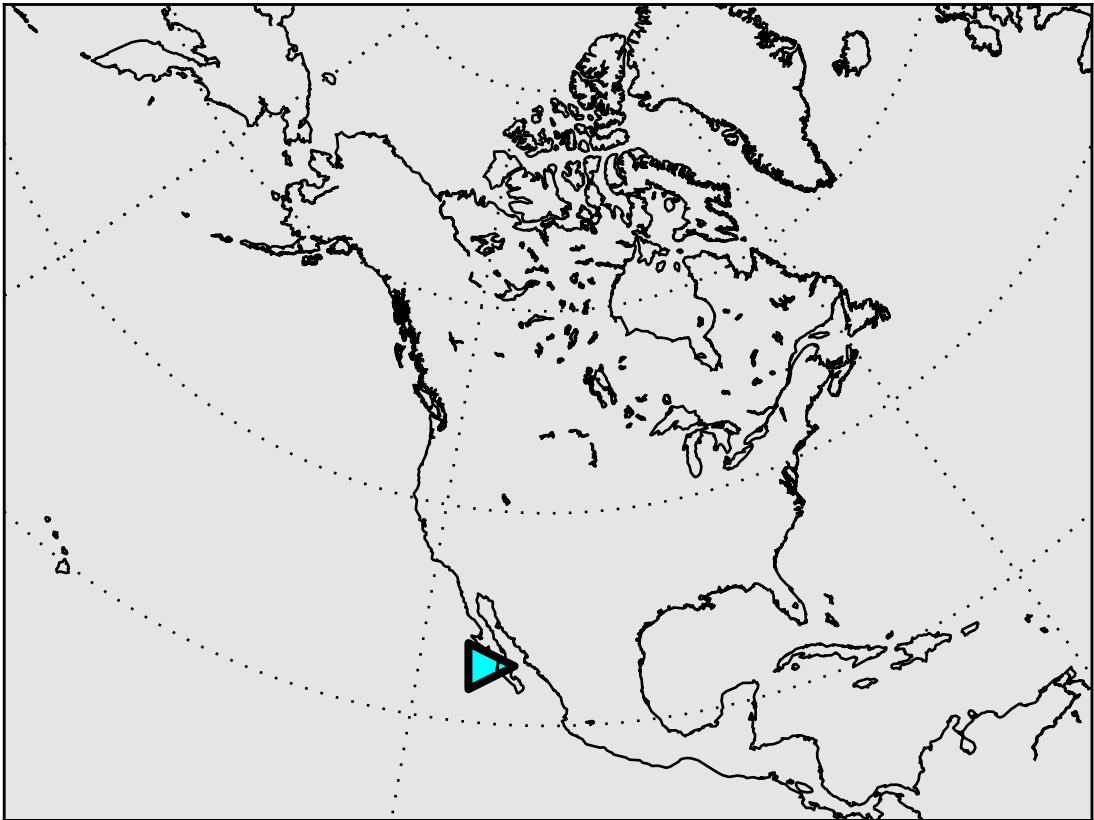

|                    |                                                                                              |
|--------------------|----------------------------------------------------------------------------------------------|
| Dataset name:      | MV99_PC14.Marchitto.2010                                                                     |
| Archive type:      | MarineSediment                                                                               |
| Proxy type:        | Mg/Ca                                                                                        |
| Variable name:     | temperature                                                                                  |
| Latitude ( ° N):   | 25.2012                                                                                      |
| Longitude ( ° E):  | -112.7167                                                                                    |
| Elevation (m):     | -541.0                                                                                       |
| Interp. variable:  | T                                                                                            |
| Interp. detail:    | sea@surface                                                                                  |
| Interp. season:    | annual                                                                                       |
| Interp. direction: | positive                                                                                     |
| Pub. 1 title:      | Dynamical response of the tropical Pacific Ocean t...                                        |
| Pub. 1 authors:    | Marchitto, T. M.; Muscheler, R.; Ortiz, J. D.; Car...                                        |
| Pub. 1 year:       | 2010                                                                                         |
| Pub. 1 DOI:        | 10.1126/science.1194887                                                                      |
| Original data URL: | <a href="http://www.ncdc.noaa.gov/paleo/study/10415">www.ncdc.noaa.gov/paleo/study/10415</a> |

Proxy data and metadata  
MarineSediment | partical size | MV99-GC41\_PC14.Arellano-Torres.2019 | RPT5jBszygP

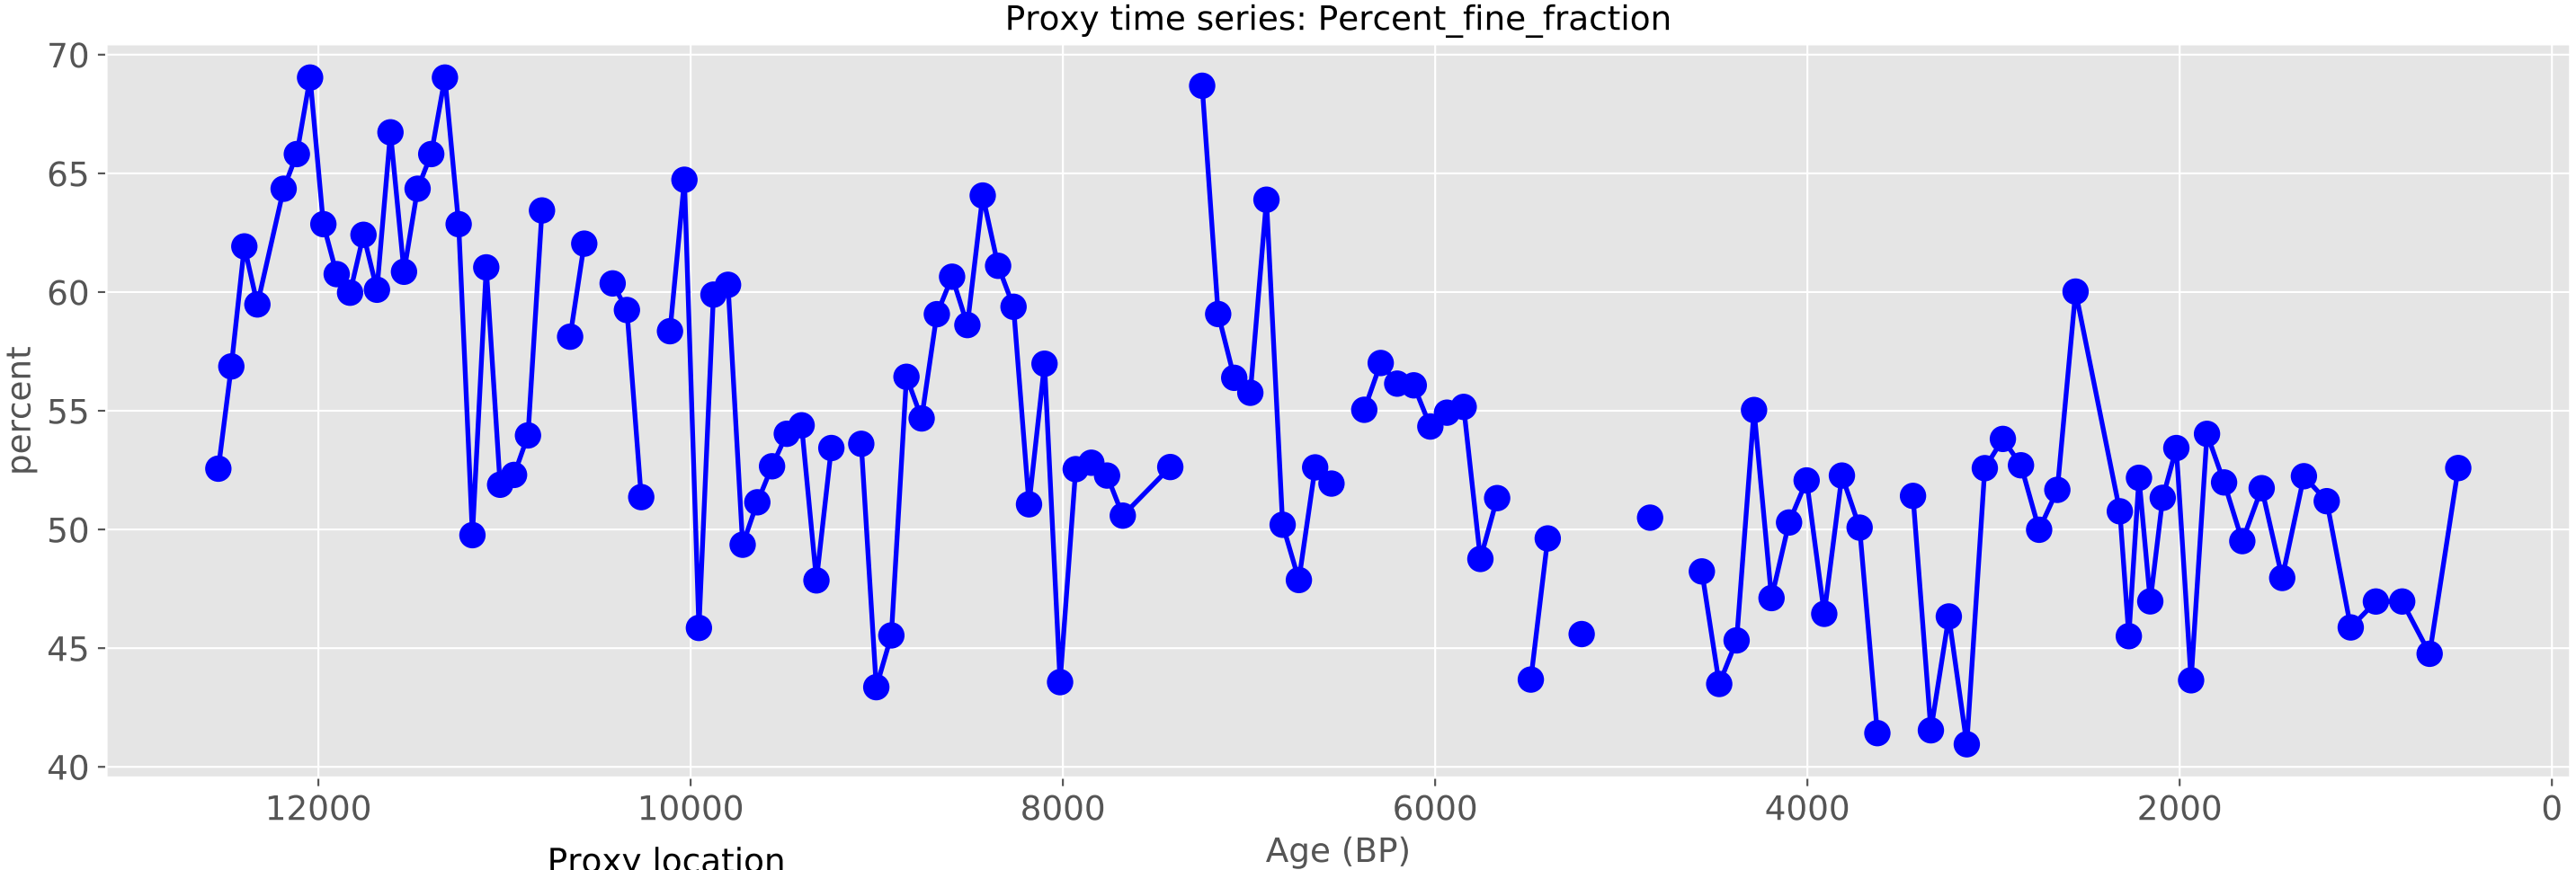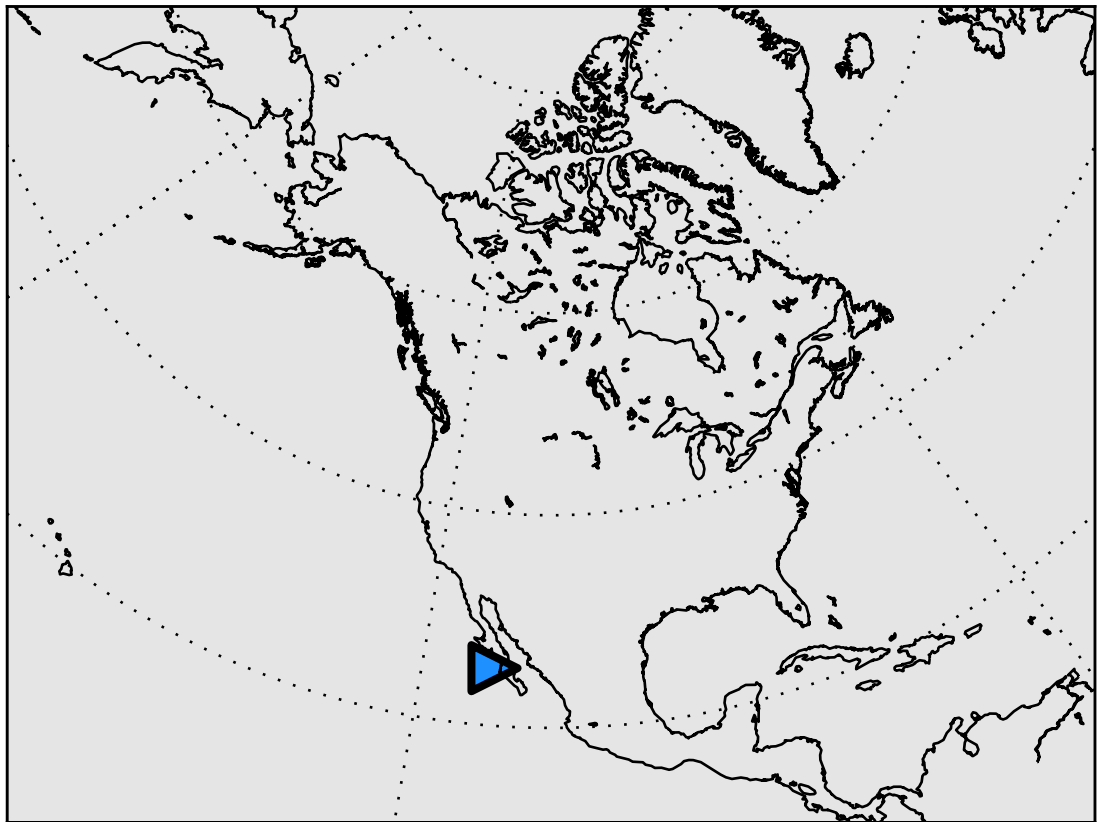

|                    |                                                       |
|--------------------|-------------------------------------------------------|
| Dataset name:      | MV99-GC41_PC14.Arellano-Torres.2019                   |
| Archive type:      | MarineSediment                                        |
| Proxy type:        | partical size                                         |
| Variable name:     | Percent_fine_fraction                                 |
| Latitude ( ° N):   | 25.2                                                  |
| Longitude ( ° E):  | -112.7167                                             |
| Elevation (m):     | -540.0                                                |
| Interp. variable:  | DUST                                                  |
| Interp. detail:    | @surface                                              |
| Interp. season:    | annual                                                |
| Interp. direction: | positive                                              |
| Pub. 1 title:      | Dynamical Response of the Tropical Pacific Ocean t... |
| Pub. 1 authors:    | Marchitto, T. M.;Muscheler, R.;Ortiz, J. D.;Carriq... |
| Pub. 1 year:       | 2010                                                  |
| Pub. 1 DOI:        | 10.1029/2018PA003479                                  |
| Original data URL: | 10.1594/PANGAEA.896898                                |



Proxy data and metadata  
MarineSediment | pollen | ODP1019.Barron.2003 | LPDac11991f

Proxy time series: Alnus

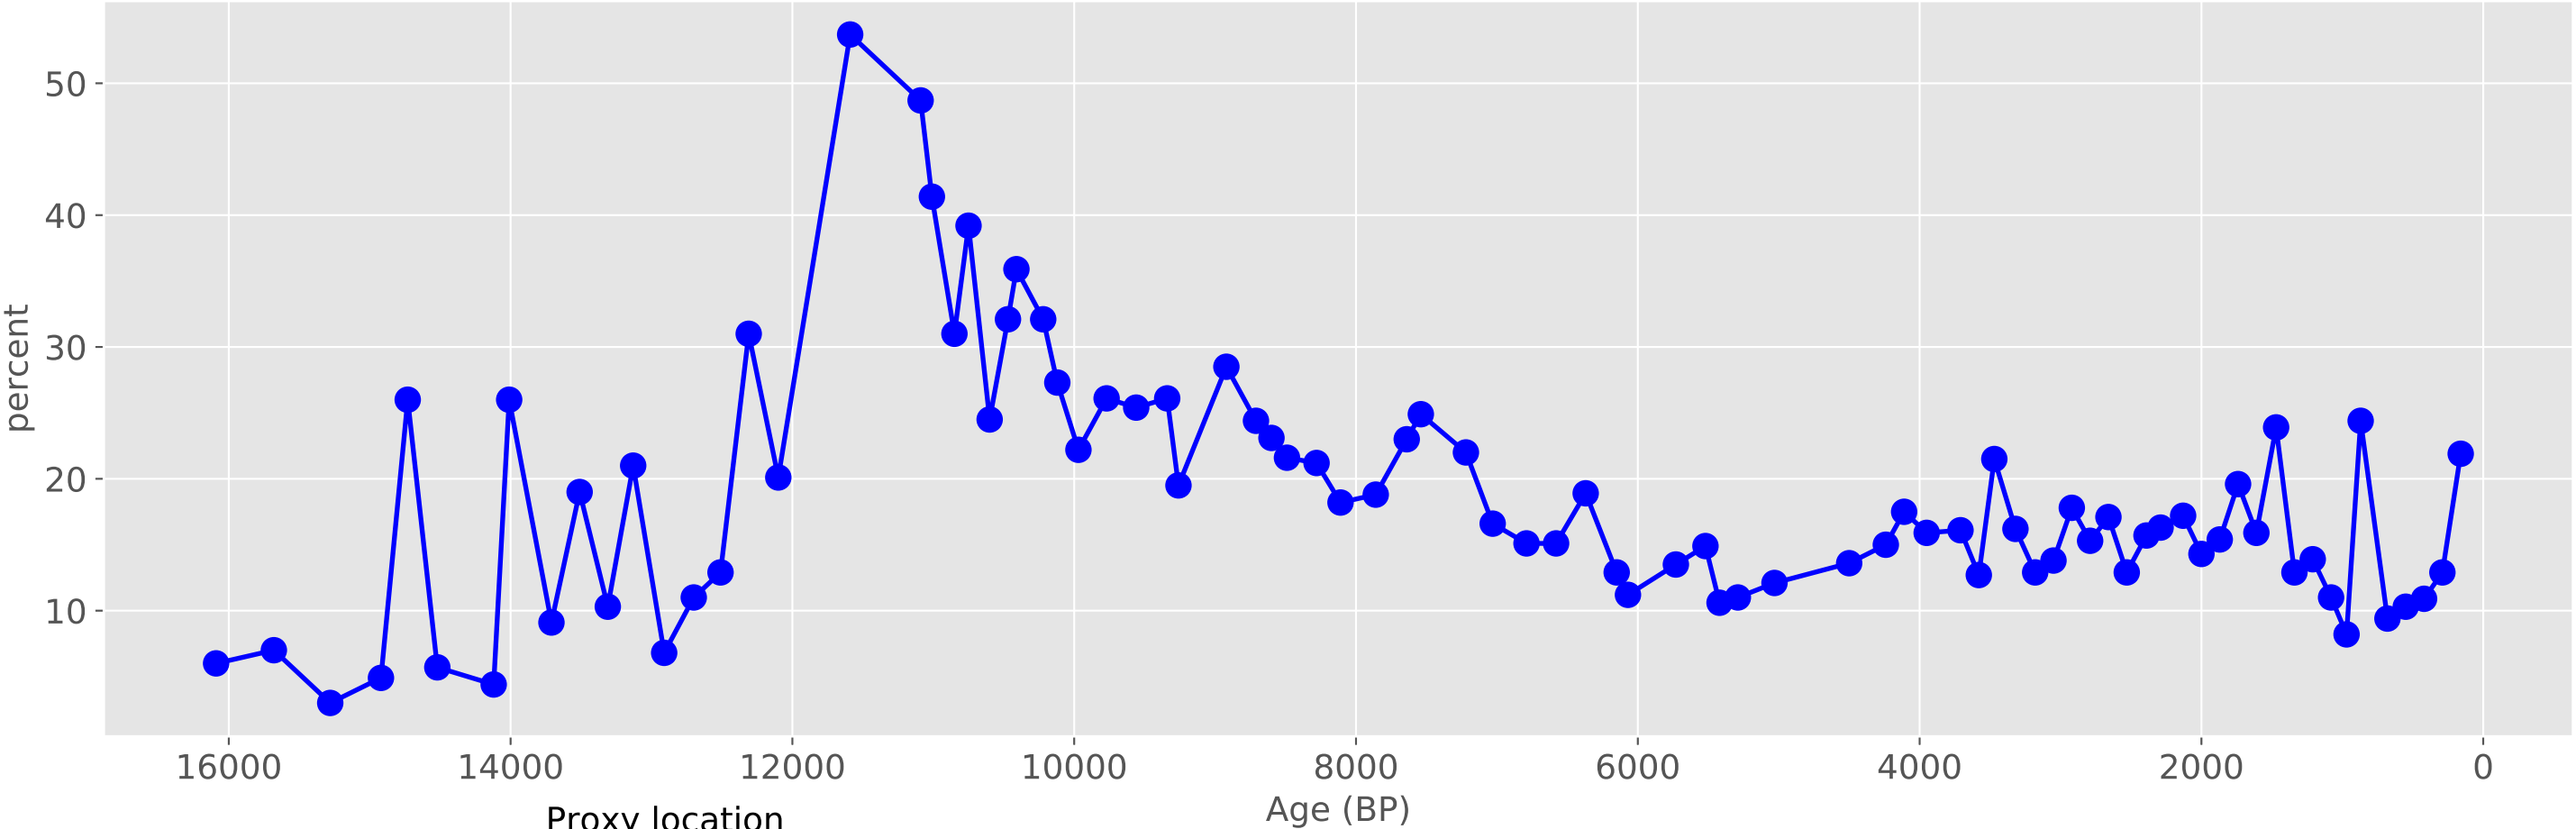

Proxy location  
(41.68 ° N, 124.93 ° W)

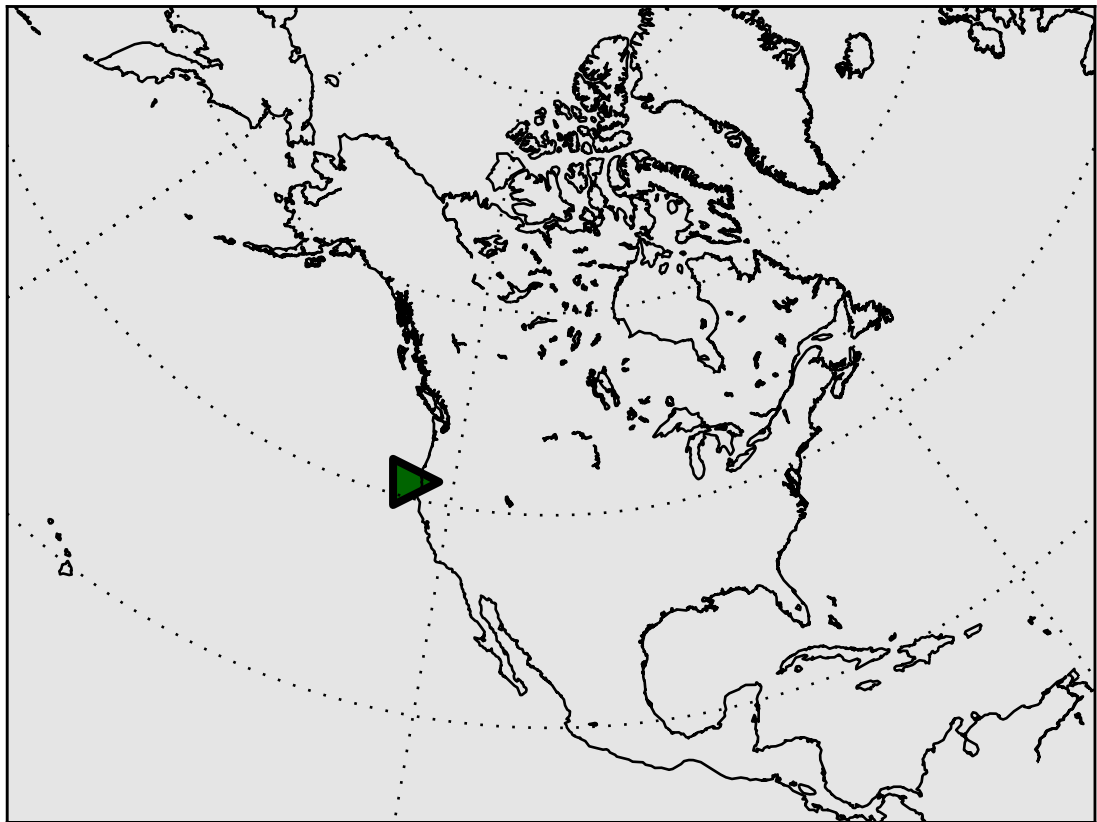

|                    |                                                                                            |
|--------------------|--------------------------------------------------------------------------------------------|
| Dataset name:      | ODP1019.Barron.2003                                                                        |
| Archive type:      | MarineSediment                                                                             |
| Proxy type:        | pollen                                                                                     |
| Variable name:     | Alnus                                                                                      |
| Latitude ( ° N):   | 41.682                                                                                     |
| Longitude ( ° E):  | -124.93                                                                                    |
| Elevation (m):     | -980.0                                                                                     |
| Interp. variable:  | P-E                                                                                        |
| Interp. detail:    | @surface                                                                                   |
| Interp. season:    | annual                                                                                     |
| Interp. direction: | positive                                                                                   |
| Pub. 1 title:      | High-resolution climatic evolution of coastal nort...                                      |
| Pub. 1 authors:    | Barron, John A.;Heusser, Linda;Herbert, Timothy;Ly...                                      |
| Pub. 1 year:       | 2003                                                                                       |
| Pub. 1 DOI:        | 10.1029/2002PA000768                                                                       |
| Original data URL: | <a href="http://www.ncdc.noaa.gov/paleo/study/5867">www.ncdc.noaa.gov/paleo/study/5867</a> |

Proxy data and metadata  
MarineSediment | pollen | ODP1019.Barron.2003 | LPDe7442731

Proxy time series: Sequoia

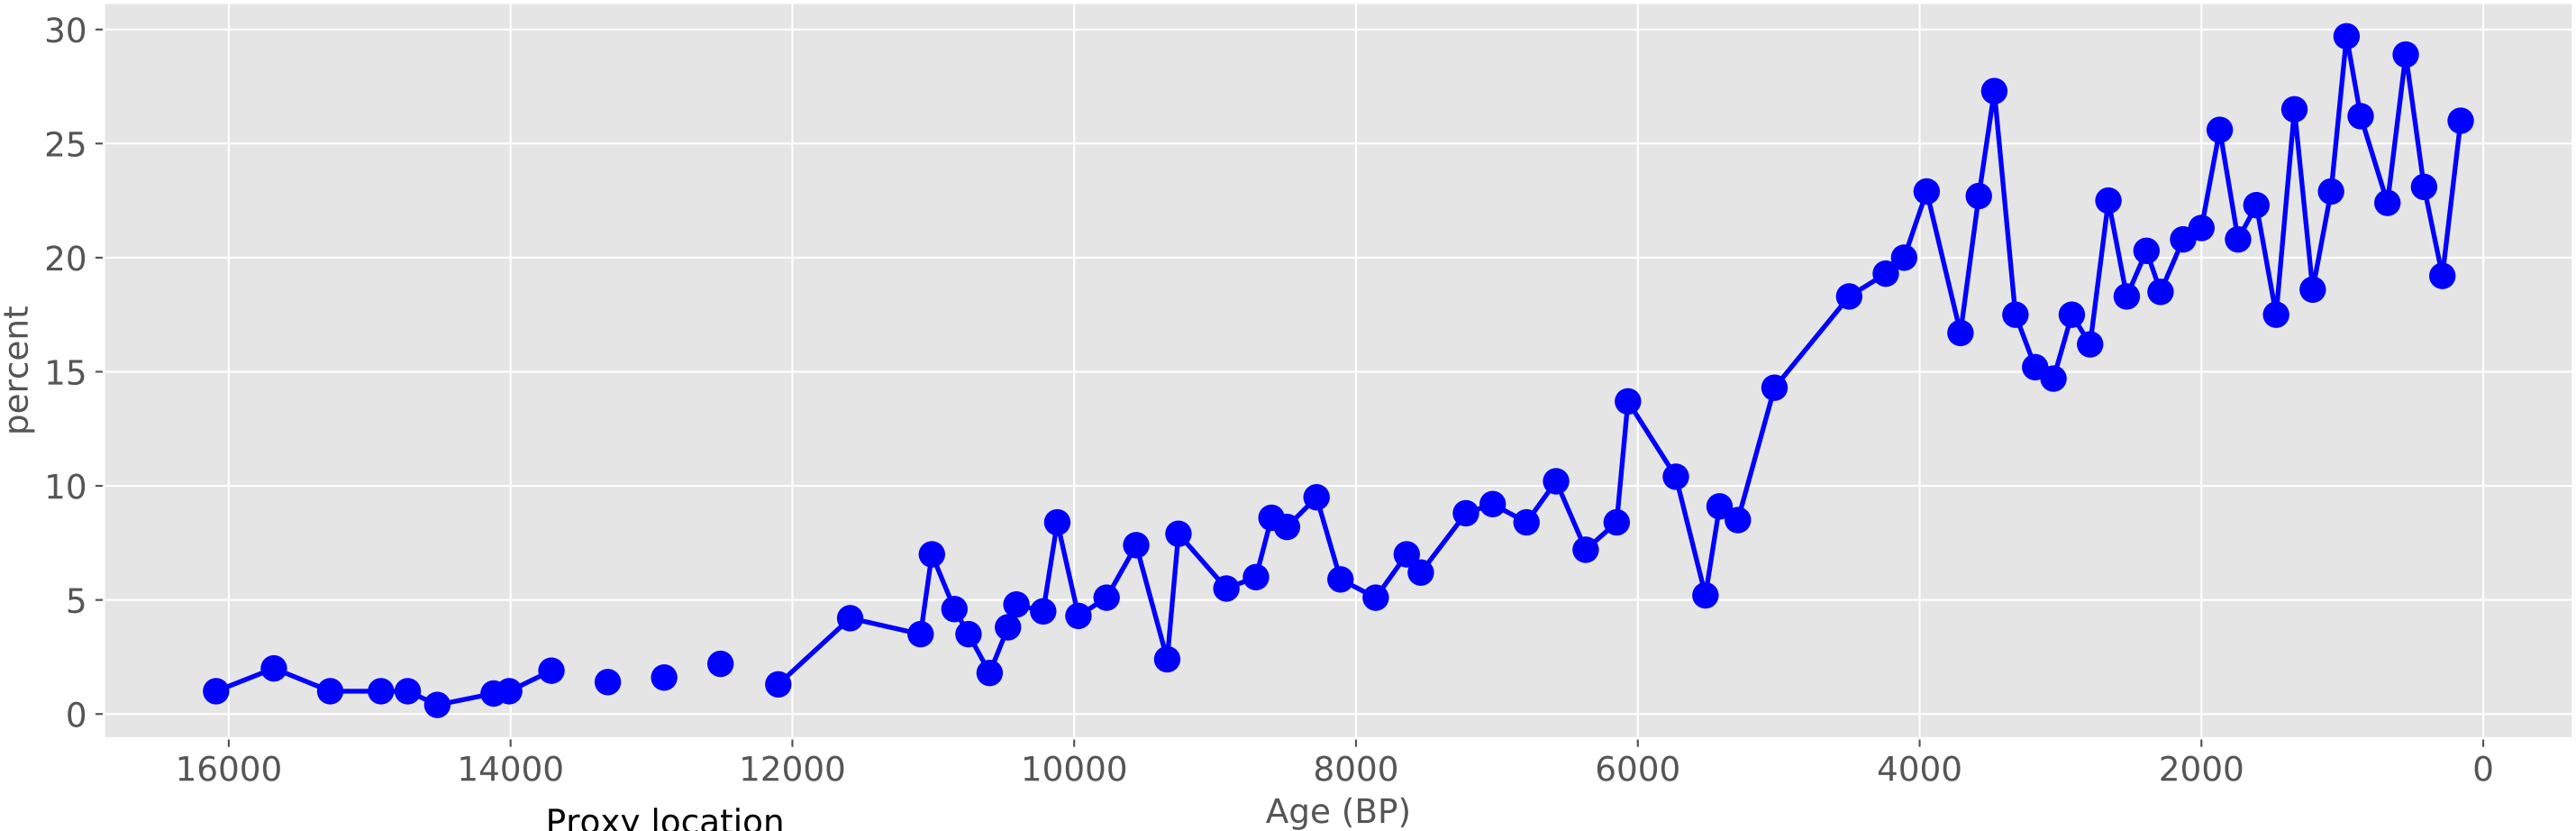

Proxy location  
(41.68 ° N, 124.93 ° W)



|                    |                                                                                            |
|--------------------|--------------------------------------------------------------------------------------------|
| Dataset name:      | ODP1019.Barron.2003                                                                        |
| Archive type:      | MarineSediment                                                                             |
| Proxy type:        | pollen                                                                                     |
| Variable name:     | Sequoia                                                                                    |
| Latitude ( ° N):   | 41.682                                                                                     |
| Longitude ( ° E):  | -124.93                                                                                    |
| Elevation (m):     | -980.0                                                                                     |
| Interp. variable:  | P-E                                                                                        |
| Interp. detail:    | upwelling@surface                                                                          |
| Interp. season:    | annual                                                                                     |
| Interp. direction: | positive                                                                                   |
| Pub. 1 title:      | High-resolution climatic evolution of coastal nort...                                      |
| Pub. 1 authors:    | Barron, John A.;Heusser, Linda;Herbert, Timothy;Ly...                                      |
| Pub. 1 year:       | 2003                                                                                       |
| Pub. 1 DOI:        | 10.1029/2002PA000768                                                                       |
| Original data URL: | <a href="http://www.ncdc.noaa.gov/paleo/study/5867">www.ncdc.noaa.gov/paleo/study/5867</a> |

Proxy data and metadata  
MarineSediment | pollen | TN062-0550.Barron.2018 | WEB49245d00

Proxy time series: Quercus

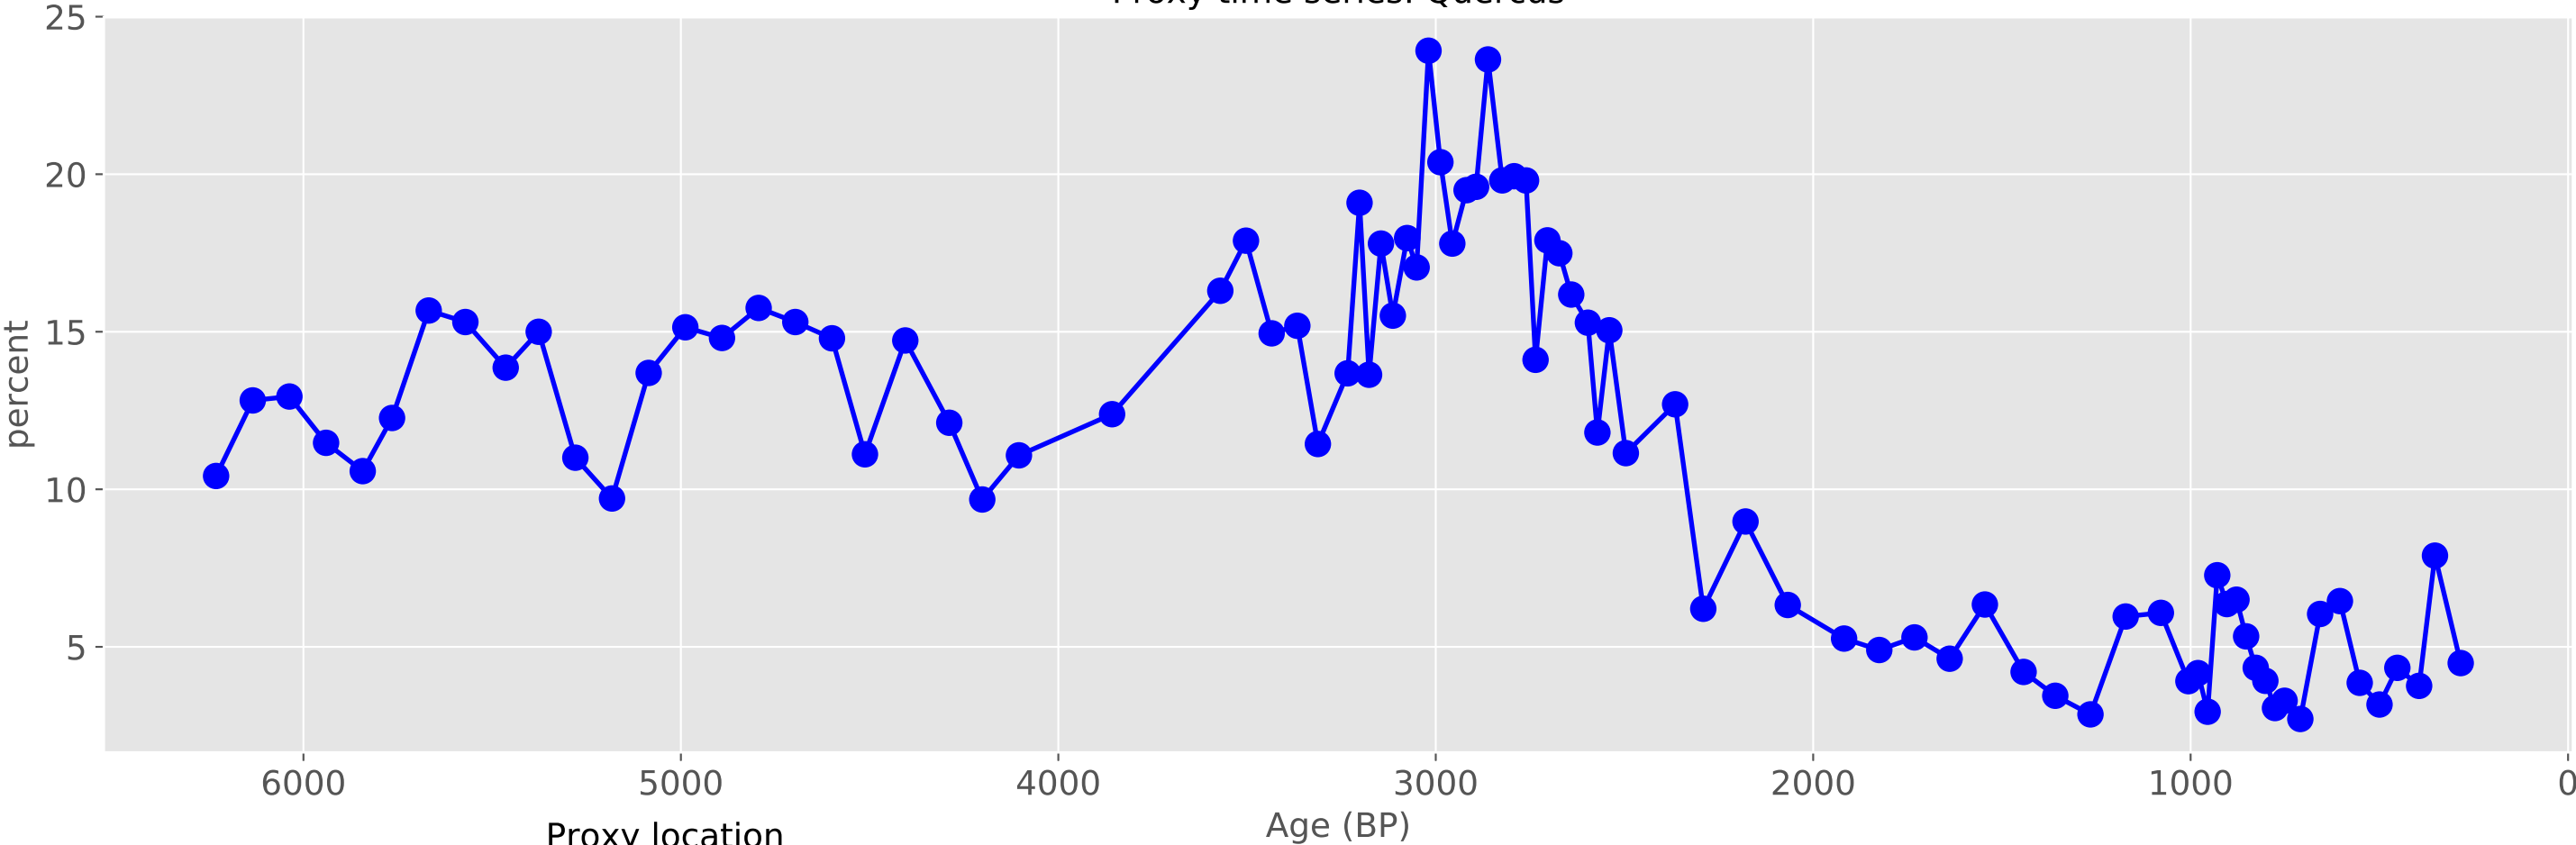

Proxy location  
(40.87 ° N, 124.57 ° W)

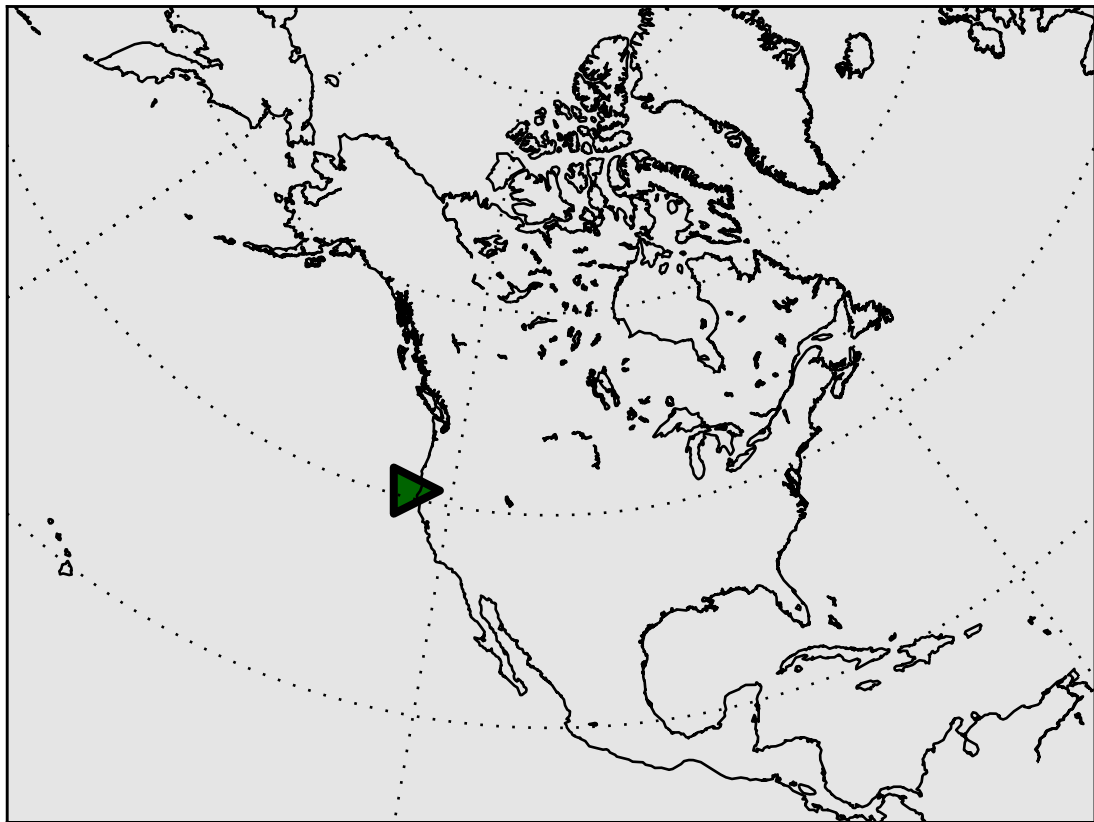

|                    |                                                       |
|--------------------|-------------------------------------------------------|
| Dataset name:      | TN062-0550.Barron.2018                                |
| Archive type:      | MarineSediment                                        |
| Proxy type:        | pollen                                                |
| Variable name:     | Quercus                                               |
| Latitude ( ° N):   | 40.8656                                               |
| Longitude ( ° E):  | -124.573                                              |
| Elevation (m):     | -569.0                                                |
| Interp. variable:  | P-E                                                   |
| Interp. detail:    | @surface                                              |
| Interp. season:    | summerOnly                                            |
| Interp. direction: | negative                                              |
| Pub. 1 title:      | High-resolution climate of the past _7300 years ...   |
| Pub. 1 authors:    | Barron, John A.; Bukry, David; Heusser, Linda E.; ... |
| Pub. 1 year:       | 2018                                                  |
| Pub. 1 DOI:        | 10.1016/j.quaint.2016.10.039                          |
| Original data URL: | www.ncdc.noaa.gov/paleo/study/27330                   |

Proxy data and metadata  
MarineSediment | pollen | TN062-0550.Barron.2018 | WEBa93dede4

Proxy time series: Sequoia

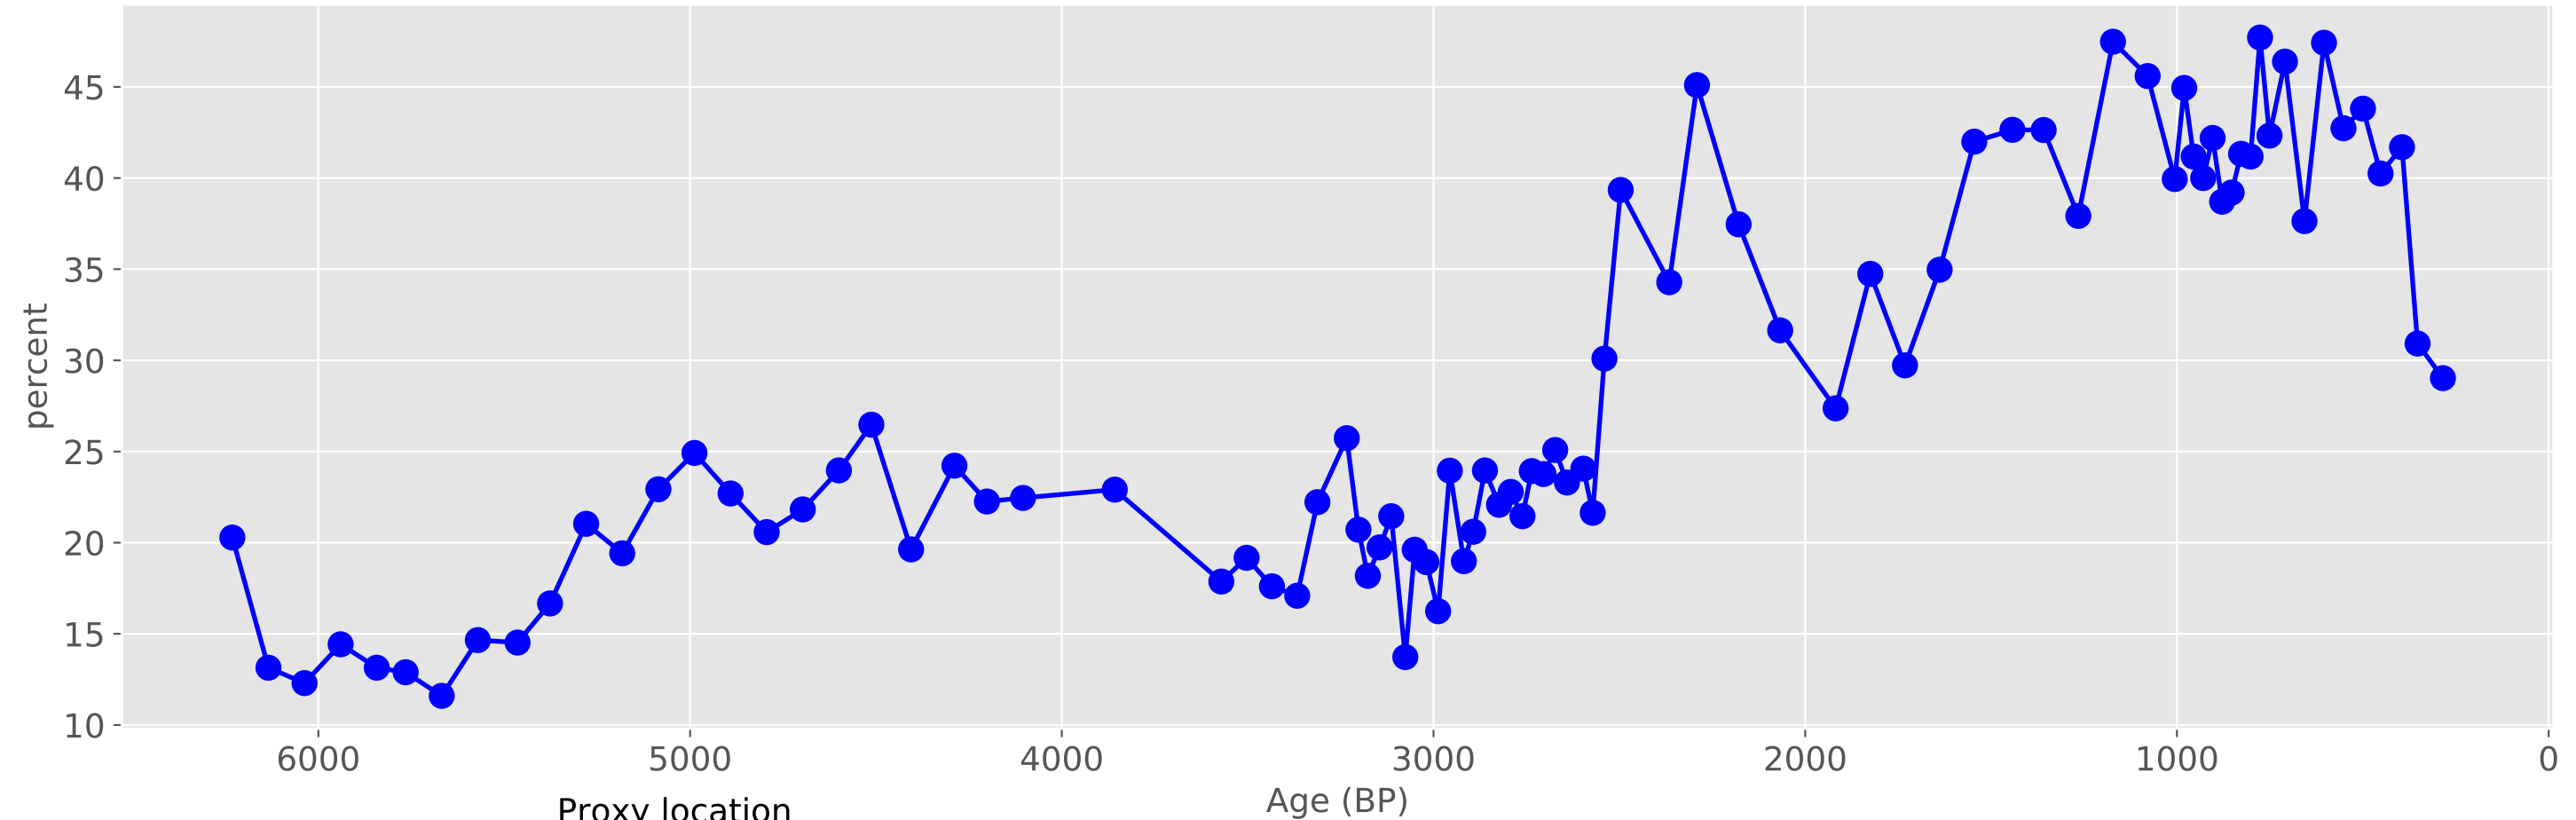

Proxy location  
(40.87 ° N, 124.57 ° W)

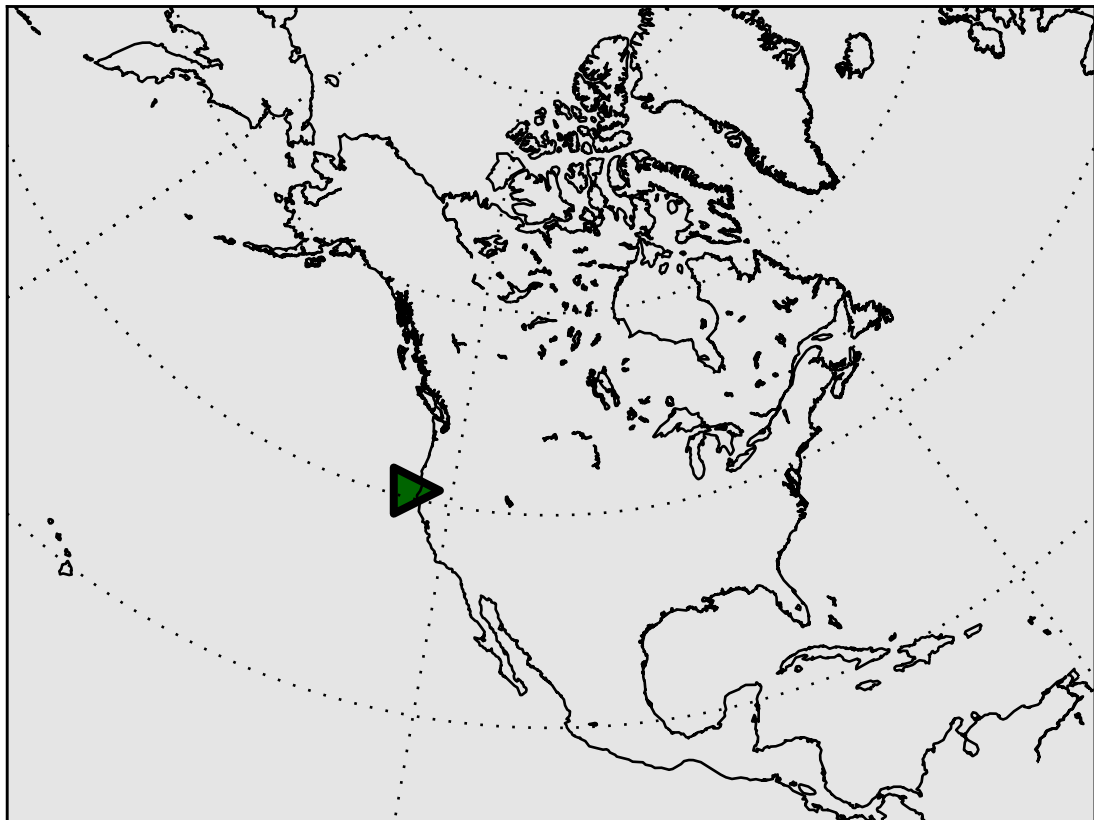

|                    |                                                       |
|--------------------|-------------------------------------------------------|
| Dataset name:      | TN062-0550.Barron.2018                                |
| Archive type:      | MarineSediment                                        |
| Proxy type:        | pollen                                                |
| Variable name:     | Sequoia                                               |
| Latitude ( ° N):   | 40.8656                                               |
| Longitude ( ° E):  | -124.573                                              |
| Elevation (m):     | -569.0                                                |
| Interp. variable:  | P-E                                                   |
| Interp. detail:    | @surface                                              |
| Interp. season:    | annual                                                |
| Interp. direction: | positive                                              |
| Pub. 1 title:      | High-resolution climate of the past _7300 years ...   |
| Pub. 1 authors:    | Barron, John A.; Bukry, David; Heusser, Linda E.; ... |
| Pub. 1 year:       | 2018                                                  |
| Pub. 1 DOI:        | 10.1016/j.quaint.2016.10.039                          |
| Original data URL: | www.ncdc.noaa.gov/paleo/study/27330                   |

Proxy data and metadata  
MarineSediment | pollen | TN062-0550.Barron.2018 | WEBe7dad2eb

Proxy time series: Picea

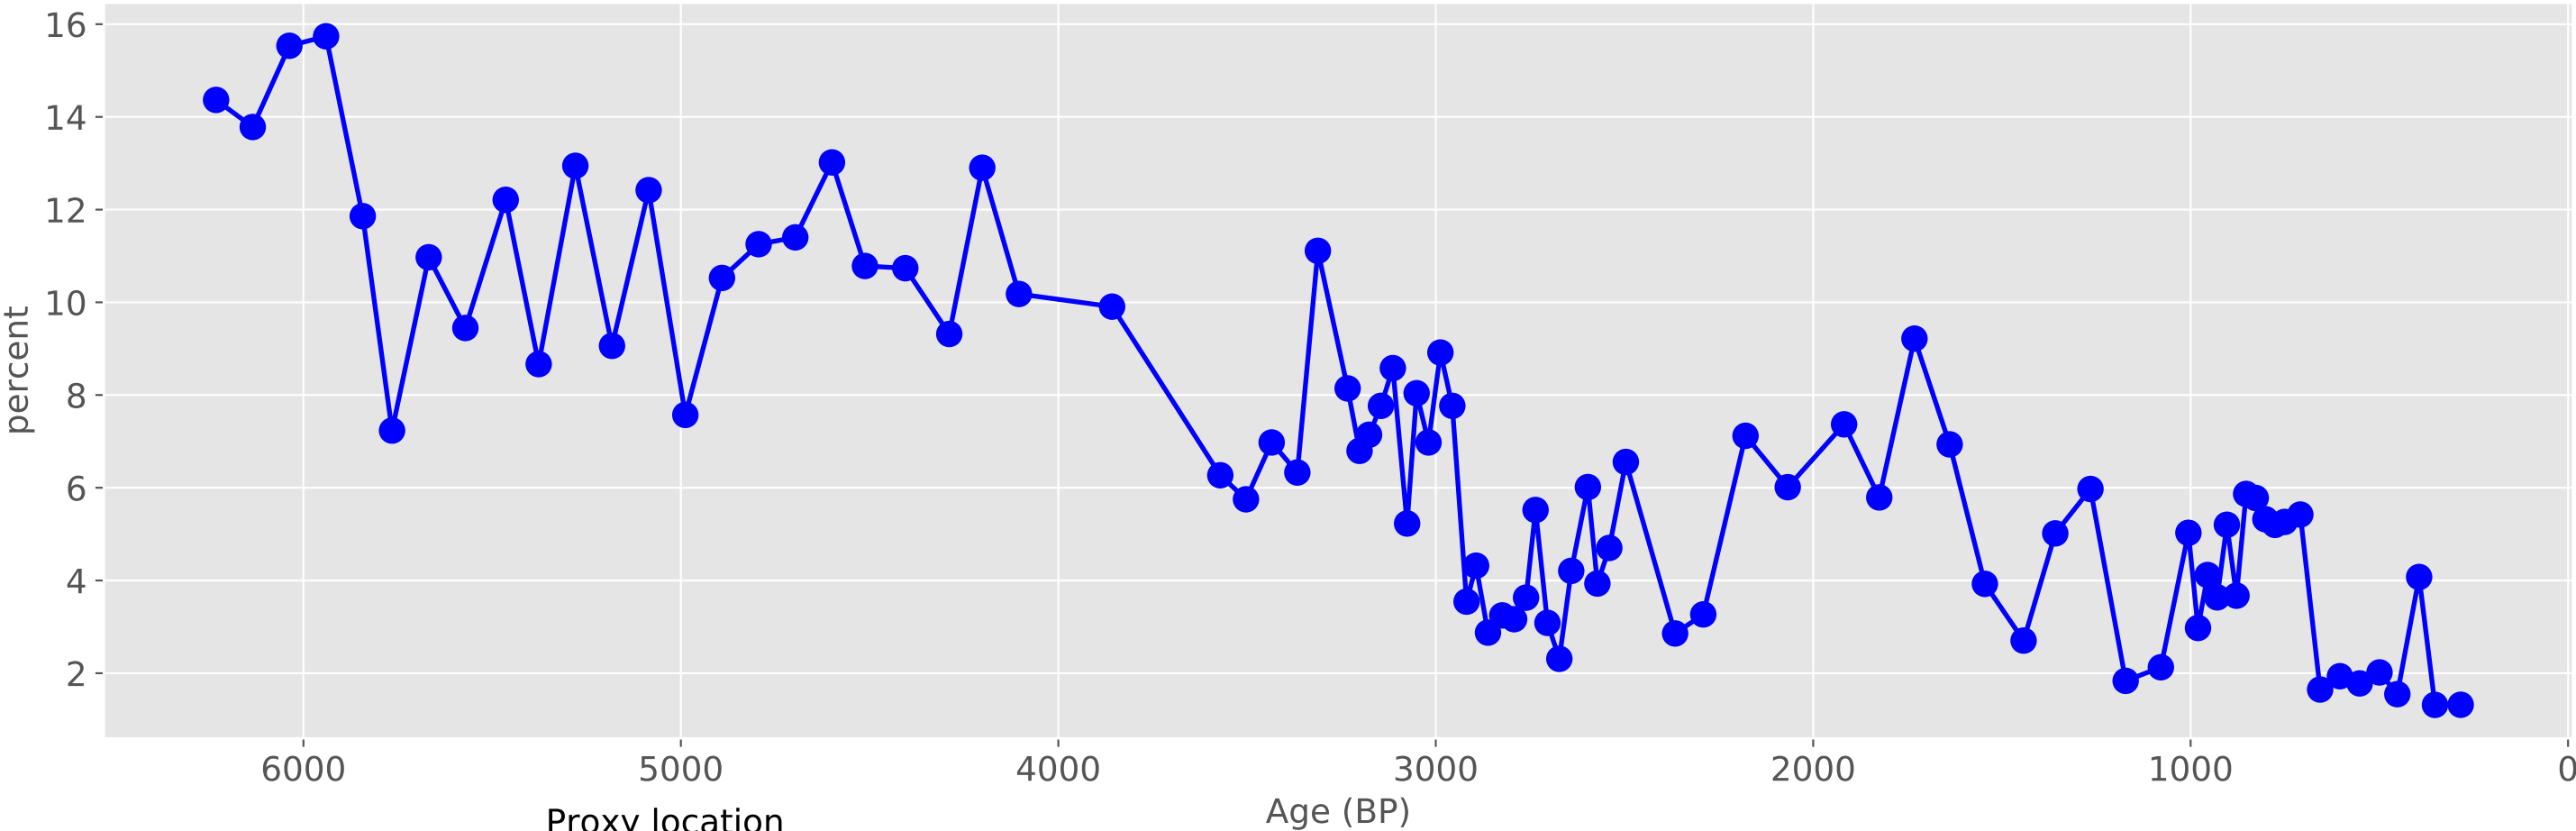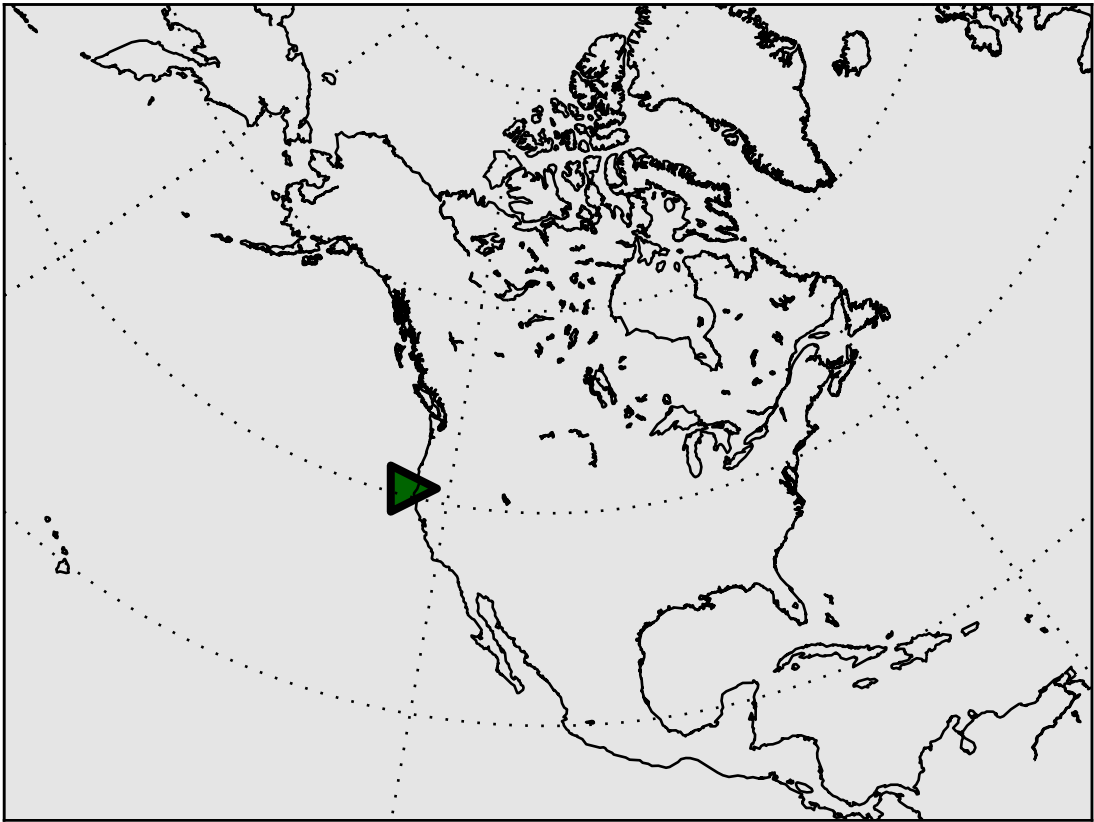

Proxy location  
(40.87 ° N, 124.57 ° W)

|                    |                                                       |
|--------------------|-------------------------------------------------------|
| Dataset name:      | TN062-0550.Barron.2018                                |
| Archive type:      | MarineSediment                                        |
| Proxy type:        | pollen                                                |
| Variable name:     | Picea                                                 |
| Latitude ( ° N):   | 40.8656                                               |
| Longitude ( ° E):  | -124.573                                              |
| Elevation (m):     | -569.0                                                |
| Interp. variable:  | T                                                     |
| Interp. detail:    | air@surface                                           |
| Interp. season:    | winterOnly                                            |
| Interp. direction: | positive                                              |
| Pub. 1 title:      | High-resolution climate of the past _7300 years ...   |
| Pub. 1 authors:    | Barron, John A.; Bukry, David; Heusser, Linda E.; ... |
| Pub. 1 year:       | 2018                                                  |
| Pub. 1 DOI:        | 10.1016/j.quaint.2016.10.039                          |
| Original data URL: | www.ncdc.noaa.gov/paleo/study/27330                   |

Proxy data and metadata  
MarineSediment | pollen | TN062-0550.Barron.2018 | WEBeb8b7a07

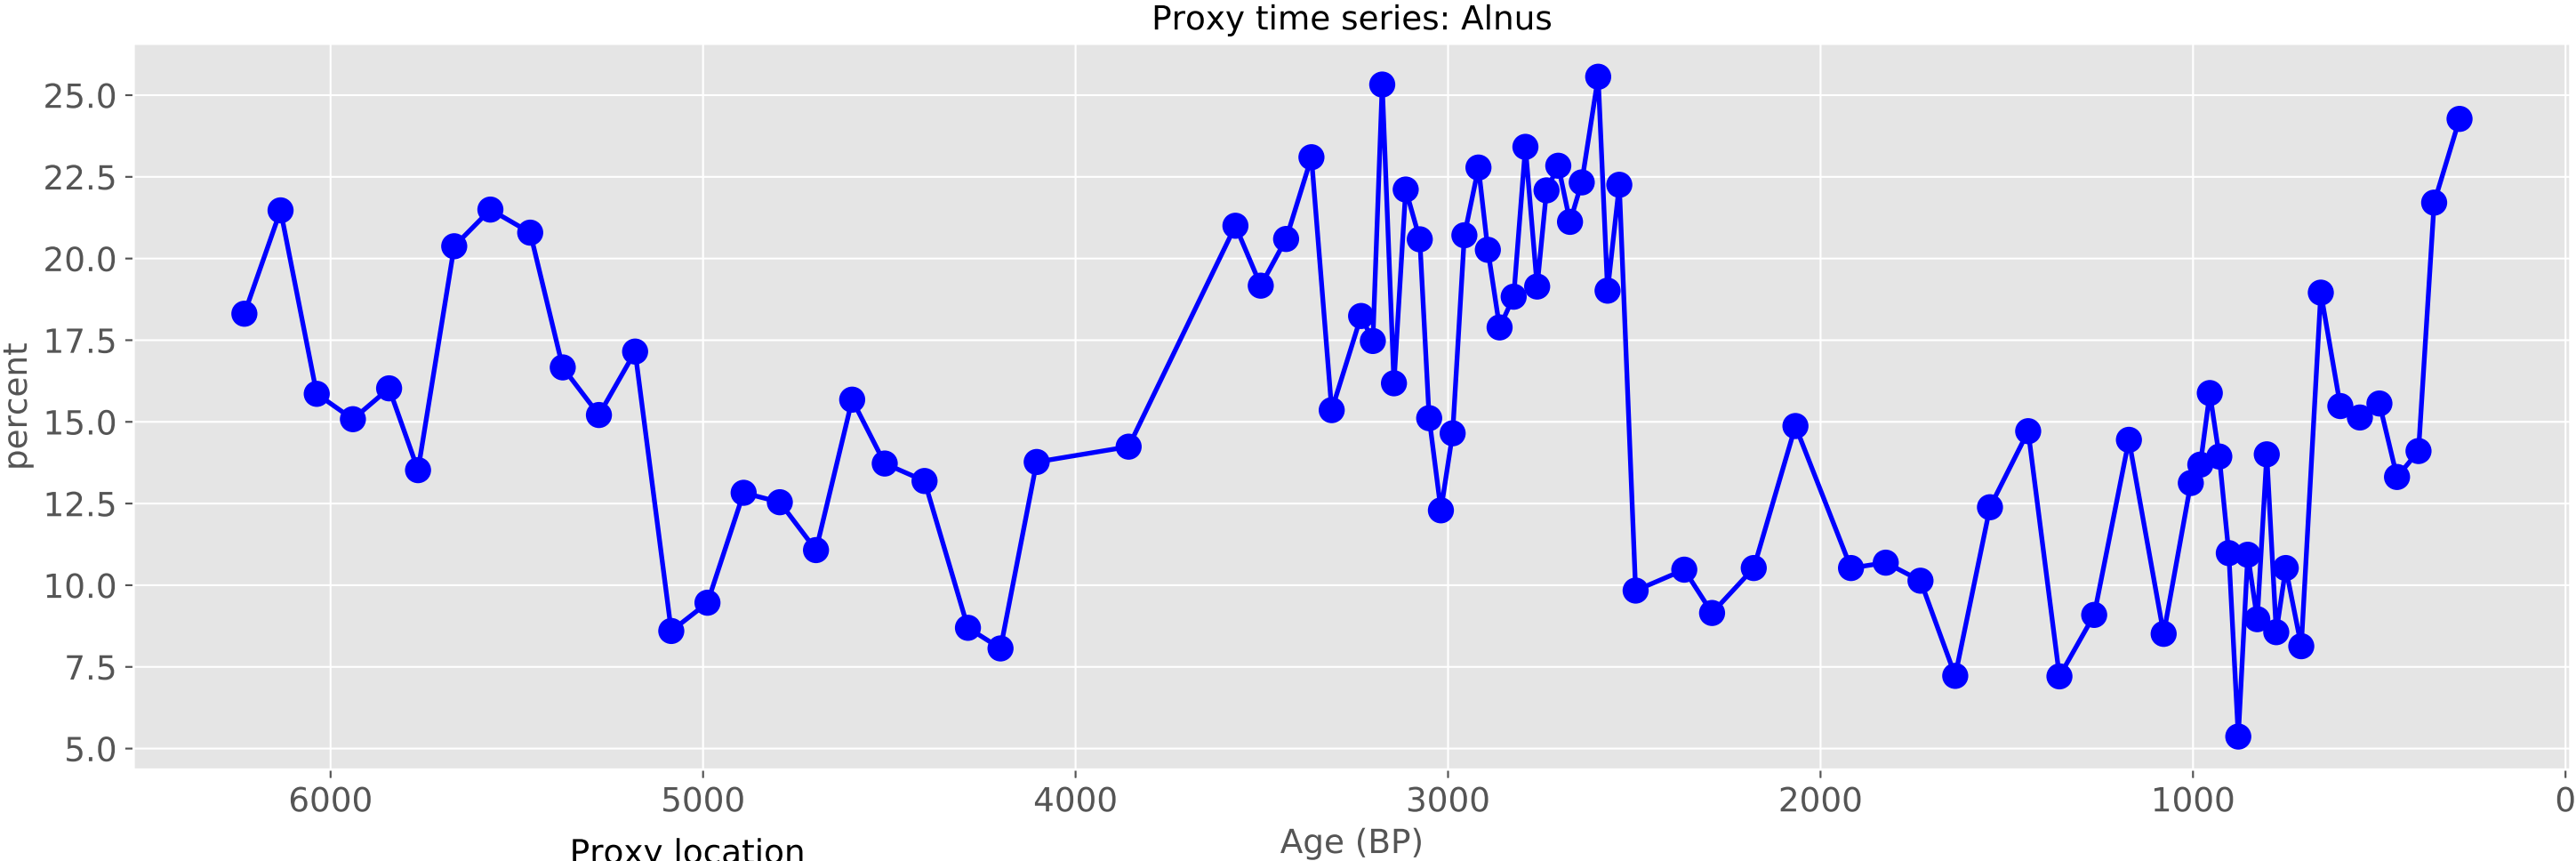

Proxy location  
(40.87 ° N, 124.57 ° W)

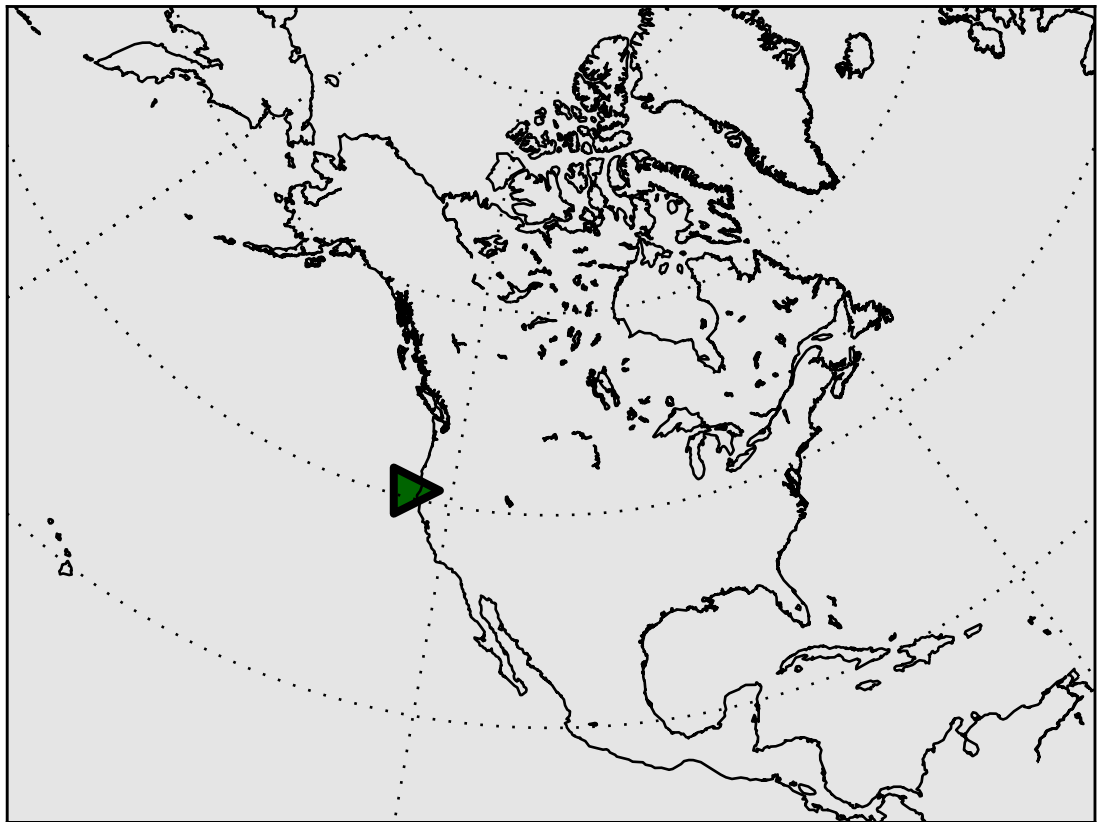

|                    |                                                       |
|--------------------|-------------------------------------------------------|
| Dataset name:      | TN062-0550.Barron.2018                                |
| Archive type:      | MarineSediment                                        |
| Proxy type:        | pollen                                                |
| Variable name:     | Alnus                                                 |
| Latitude ( ° N):   | 40.8656                                               |
| Longitude ( ° E):  | -124.573                                              |
| Elevation (m):     | -569.0                                                |
| Interp. variable:  | P-E                                                   |
| Interp. detail:    | @surface                                              |
| Interp. season:    | annual                                                |
| Interp. direction: | positive                                              |
| Pub. 1 title:      | High-resolution climate of the past _7300 years ...   |
| Pub. 1 authors:    | Barron, John A.; Bukry, David; Heusser, Linda E.; ... |
| Pub. 1 year:       | 2018                                                  |
| Pub. 1 DOI:        | 10.1016/j.quaint.2016.10.039                          |
| Original data URL: | www.ncdc.noaa.gov/paleo/study/27330                   |



Proxy data and metadata  
MarineSediment | stratigraphy | MV0811-14JC.Du.2018 | LPD7939faee

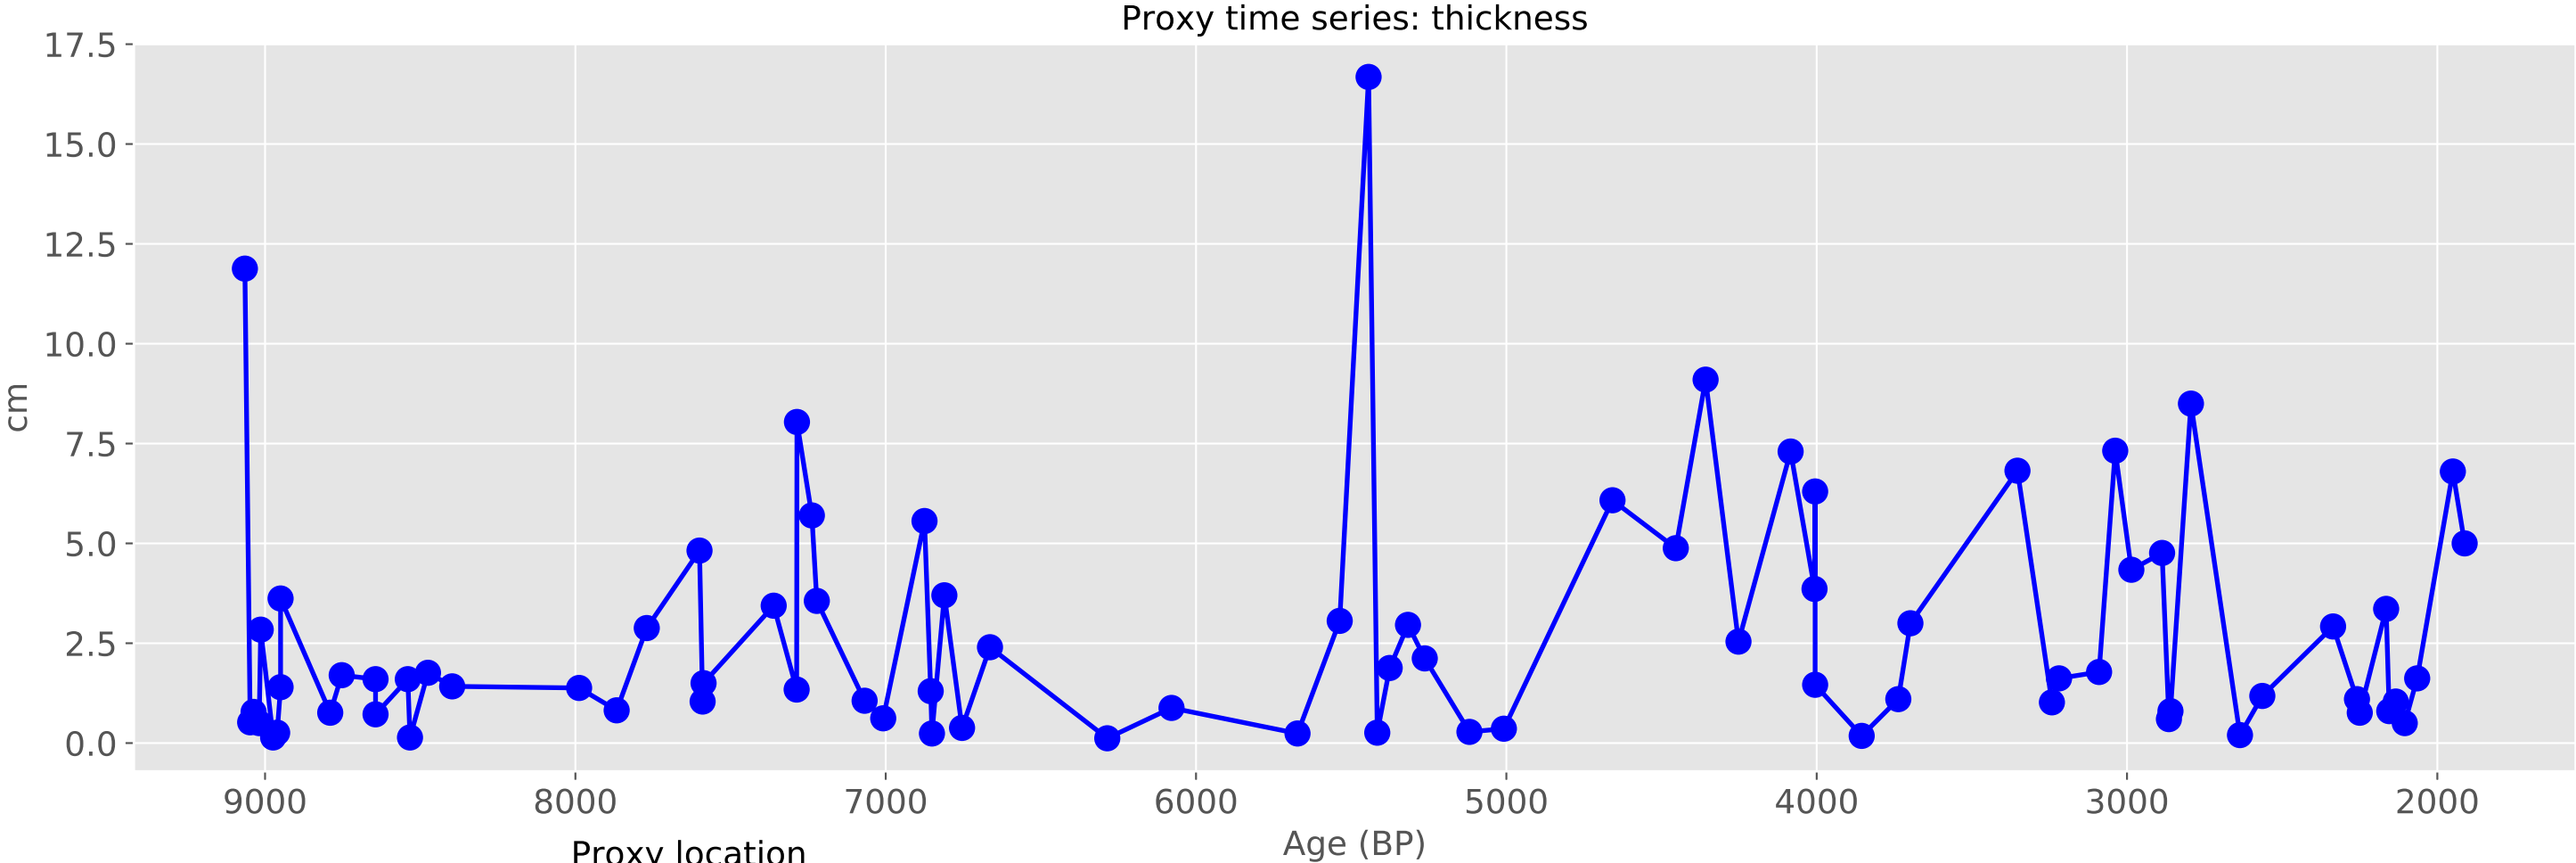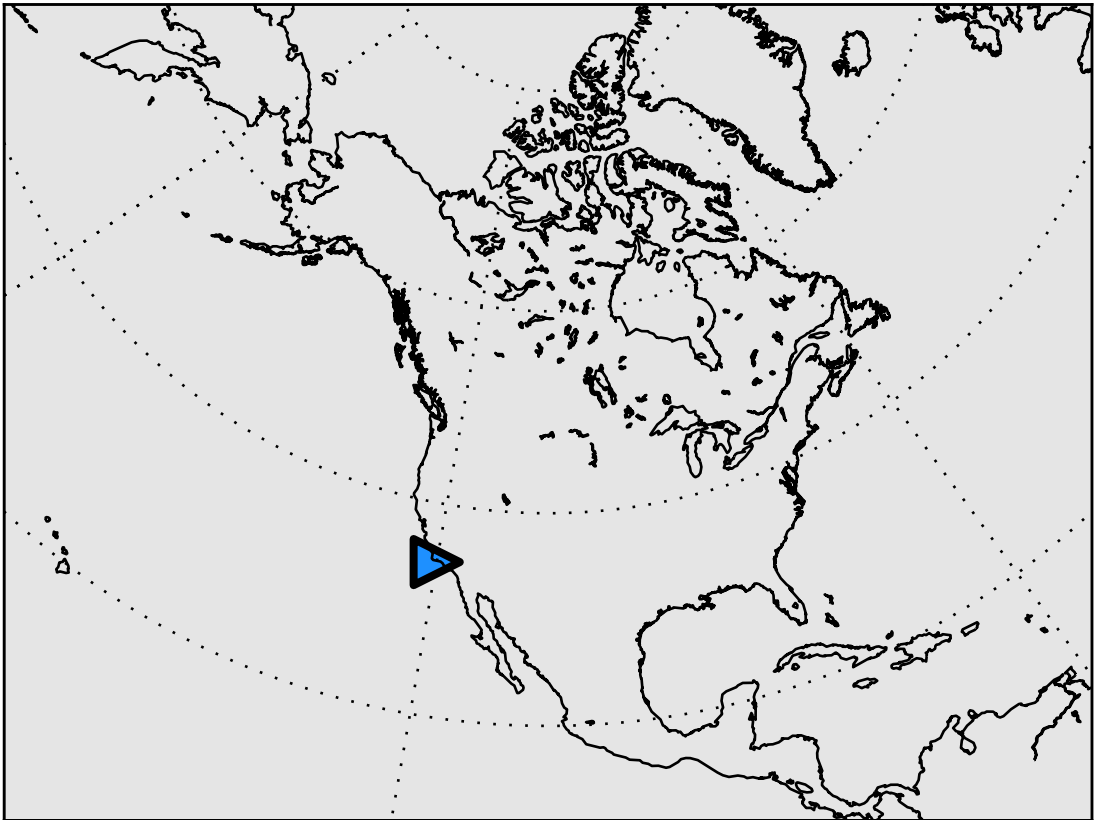

|                    |                                                       |
|--------------------|-------------------------------------------------------|
| Dataset name:      | MV0811-14JC.Du.2018                                   |
| Archive type:      | MarineSediment                                        |
| Proxy type:        | stratigraphy                                          |
| Variable name:     | thickness                                             |
| Latitude ( ° N):   | 34.3                                                  |
| Longitude ( ° E):  | -120.0                                                |
| Elevation (m):     | -591.0                                                |
| Interp. variable:  | P                                                     |
| Interp. detail:    | flood@surface                                         |
| Interp. season:    | annual                                                |
| Interp. direction: | positive                                              |
| Pub. 1 title:      | A 9000-year flood history for Southern California:... |
| Pub. 1 authors:    | Du, Xiaojing;Hendy, Ingrid;Schimmelmann, Arndt        |
| Pub. 1 year:       | 2018                                                  |
| Pub. 1 DOI:        | 10.1016/j.margeo.2017.11.014                          |
| Original data URL: | wNAm                                                  |

Proxy data and metadata  
Midden | macrofossils | MiddenCluster4.Harbert.2018 | WEB05240426

Proxy time series: precipitation

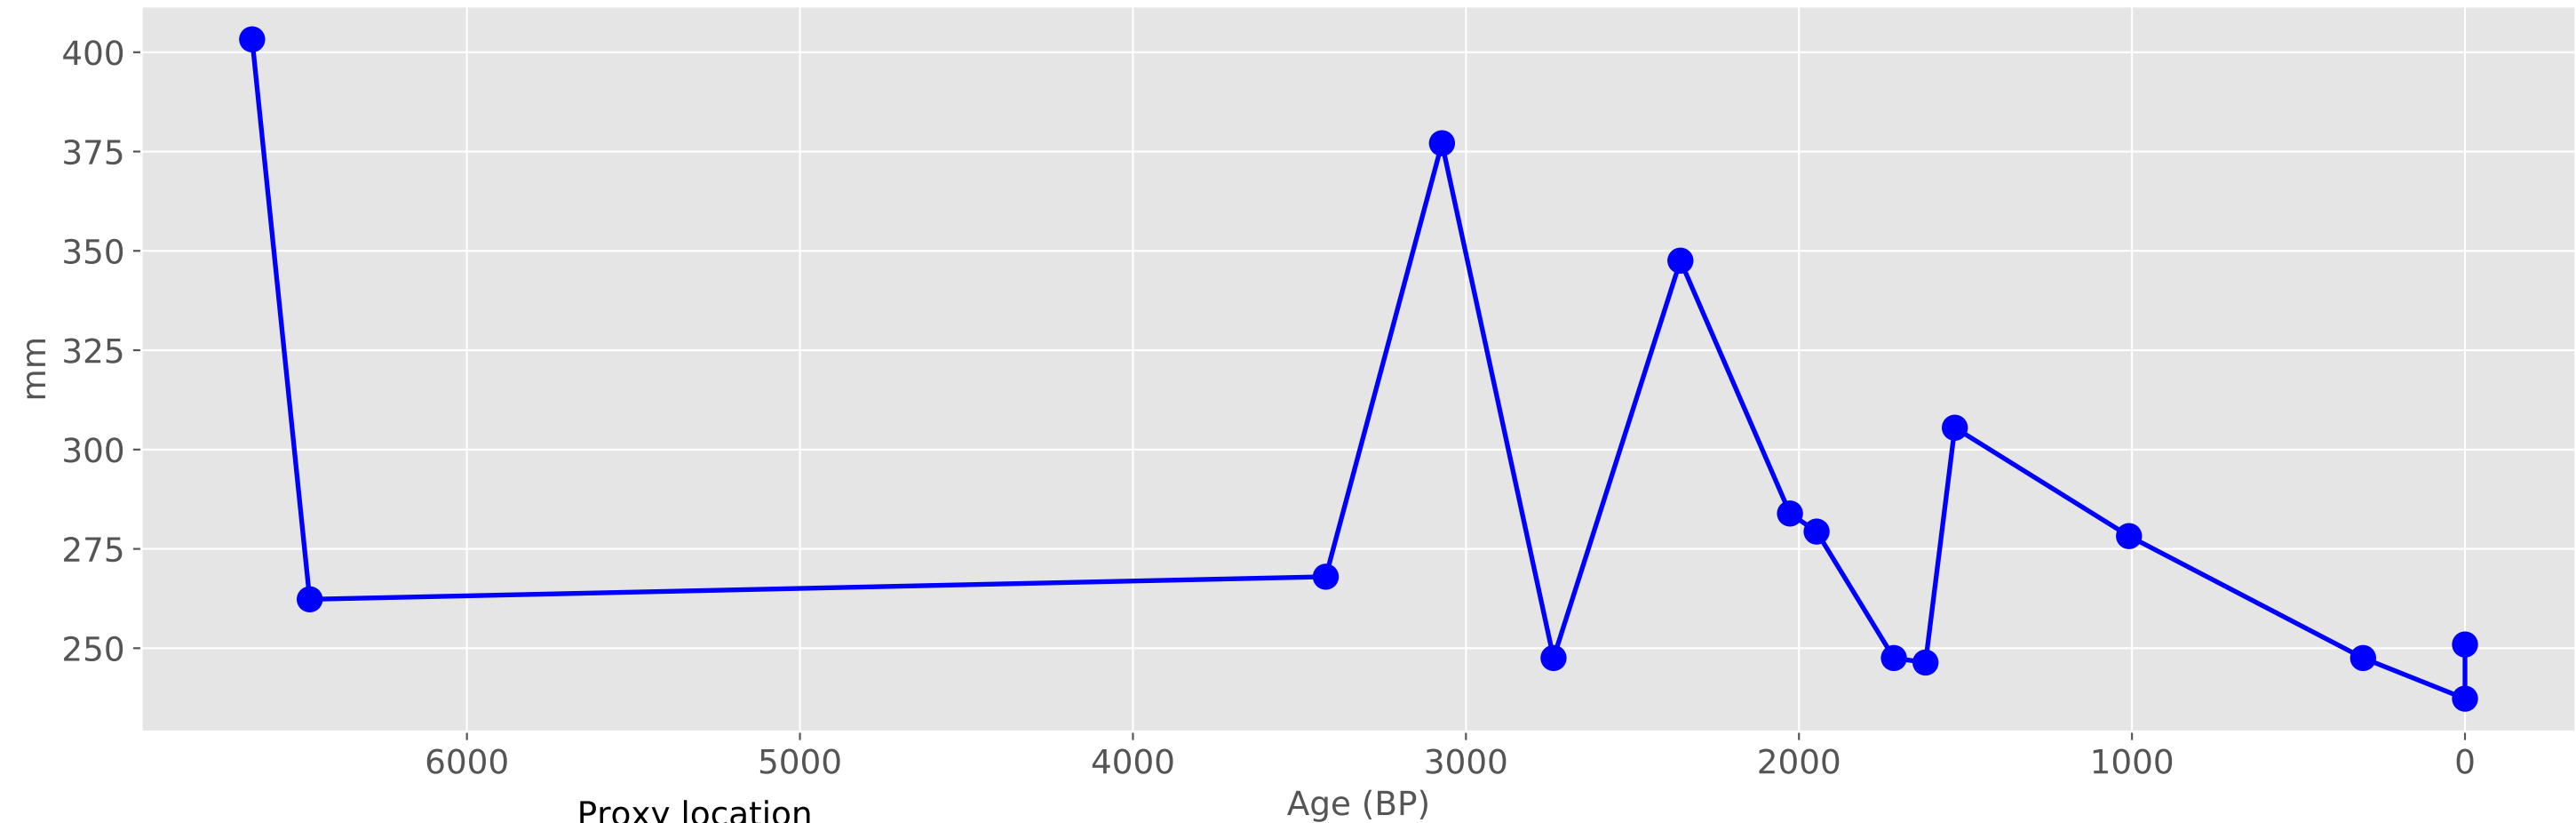

Proxy location  
(43.65 ° N, 112.75 ° W)

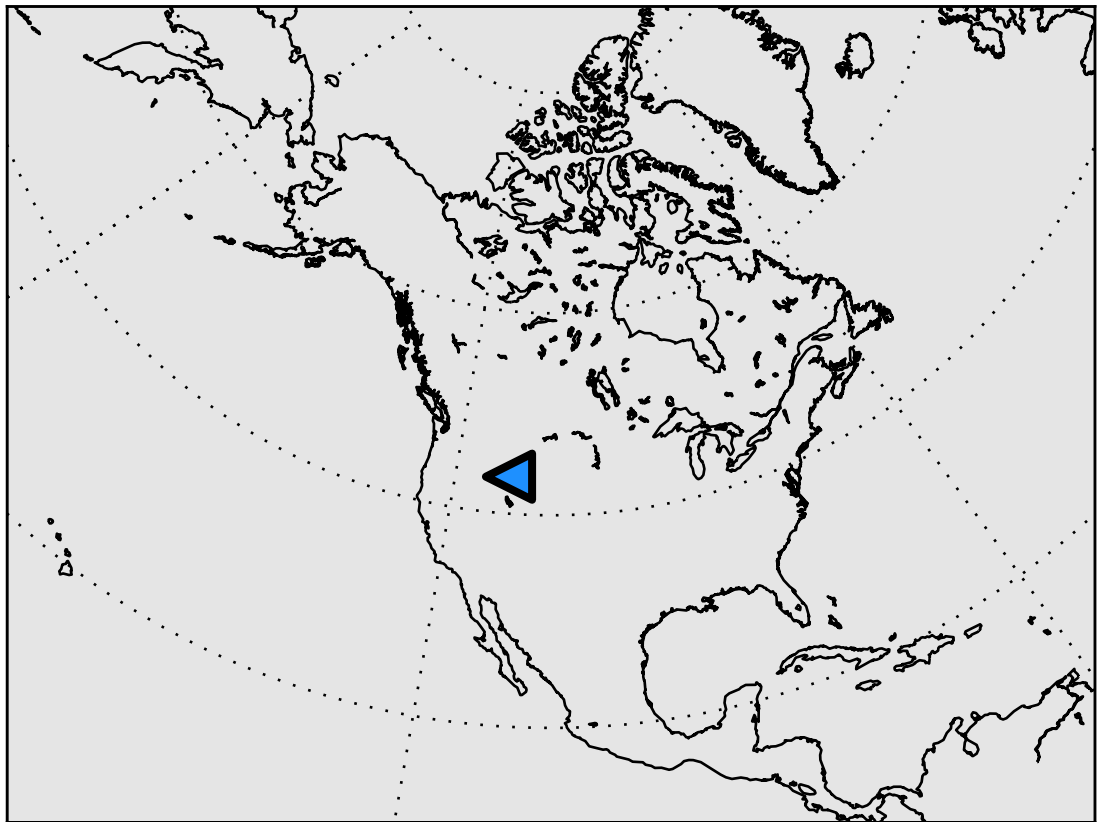

|                    |                                                       |
|--------------------|-------------------------------------------------------|
| Dataset name:      | MiddenCluster4.Harbert.2018                           |
| Archive type:      | Midden                                                |
| Proxy type:        | macrofossils                                          |
| Variable name:     | precipitation                                         |
| Latitude ( ° N):   | 43.6488                                               |
| Longitude ( ° E):  | -112.7451                                             |
| Elevation (m):     | 1517.0                                                |
| Interp. variable:  | P                                                     |
| Interp. detail:    | amount@surface                                        |
| Interp. season:    | annual                                                |
| Interp. direction: | positive                                              |
| Pub. 1 title:      | Quantitative Late Quaternary climate reconstructio... |
| Pub. 1 authors:    | Harbert, Robert S.; Nixon, Kevin C.                   |
| Pub. 1 year:       | 2018                                                  |
| Pub. 1 DOI:        | 10.5334/oq.46                                         |
| Original data URL: | geochange.er.usgs.gov/midden/                         |

Proxy data and metadata

Midden | macrofossils | MiddenCluster4.Harbert.2018 | WEB7a49dd55

Proxy time series: waterBalance

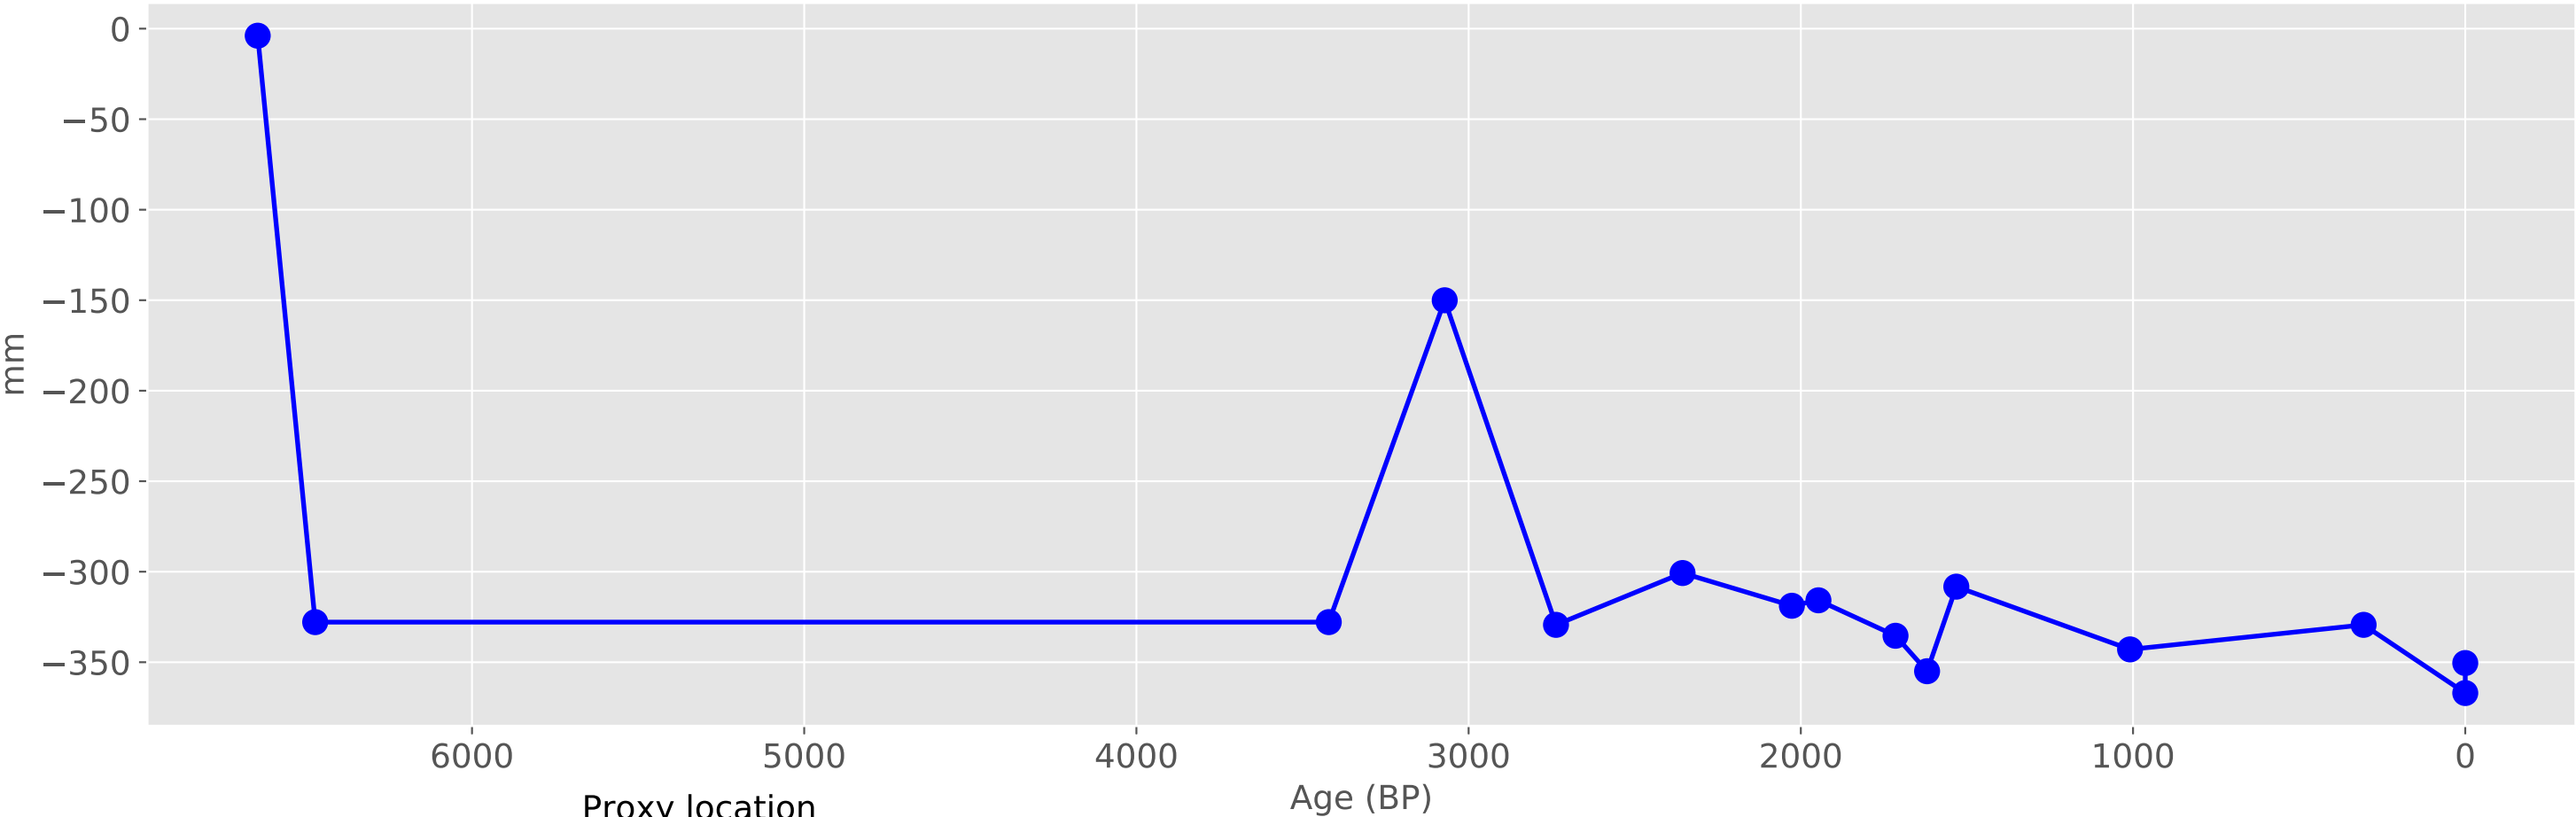

Proxy location  
(43.65 ° N, 112.75 ° W)

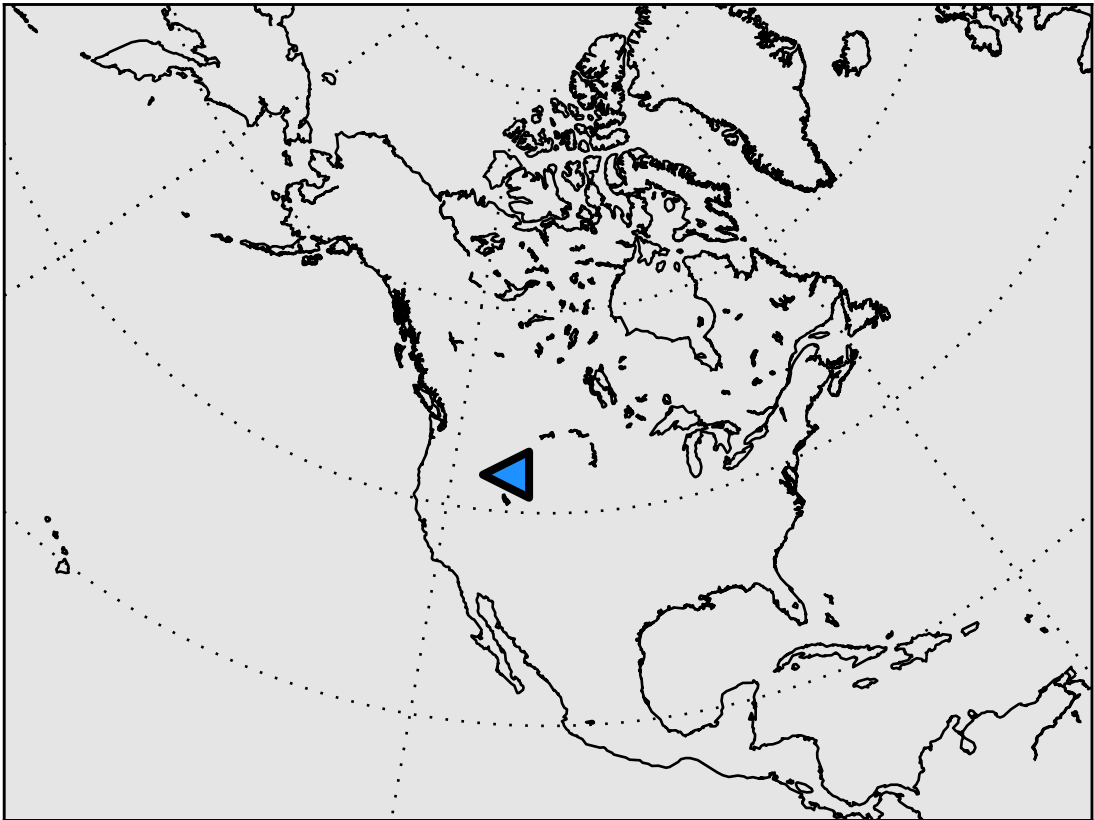

|                    |                                                       |
|--------------------|-------------------------------------------------------|
| Dataset name:      | MiddenCluster4.Harbert.2018                           |
| Archive type:      | Midden                                                |
| Proxy type:        | macrofossils                                          |
| Variable name:     | waterBalance                                          |
| Latitude ( ° N):   | 43.6488                                               |
| Longitude ( ° E):  | -112.7451                                             |
| Elevation (m):     | 1517.0                                                |
| Interp. variable:  | P-E                                                   |
| Interp. detail:    | @surface                                              |
| Interp. season:    | annual                                                |
| Interp. direction: | positive                                              |
| Pub. 1 title:      | Quantitative Late Quaternary climate reconstructio... |
| Pub. 1 authors:    | Harbert, Robert S.; Nixon, Kevin C.                   |
| Pub. 1 year:       | 2018                                                  |
| Pub. 1 DOI:        | 10.5334/oq.46                                         |
| Original data URL: | geochange.er.usgs.gov/midden/                         |

Proxy data and metadata

Midden | macrofossils | MiddenCluster4.Harbert.2018 | WEBa31332024

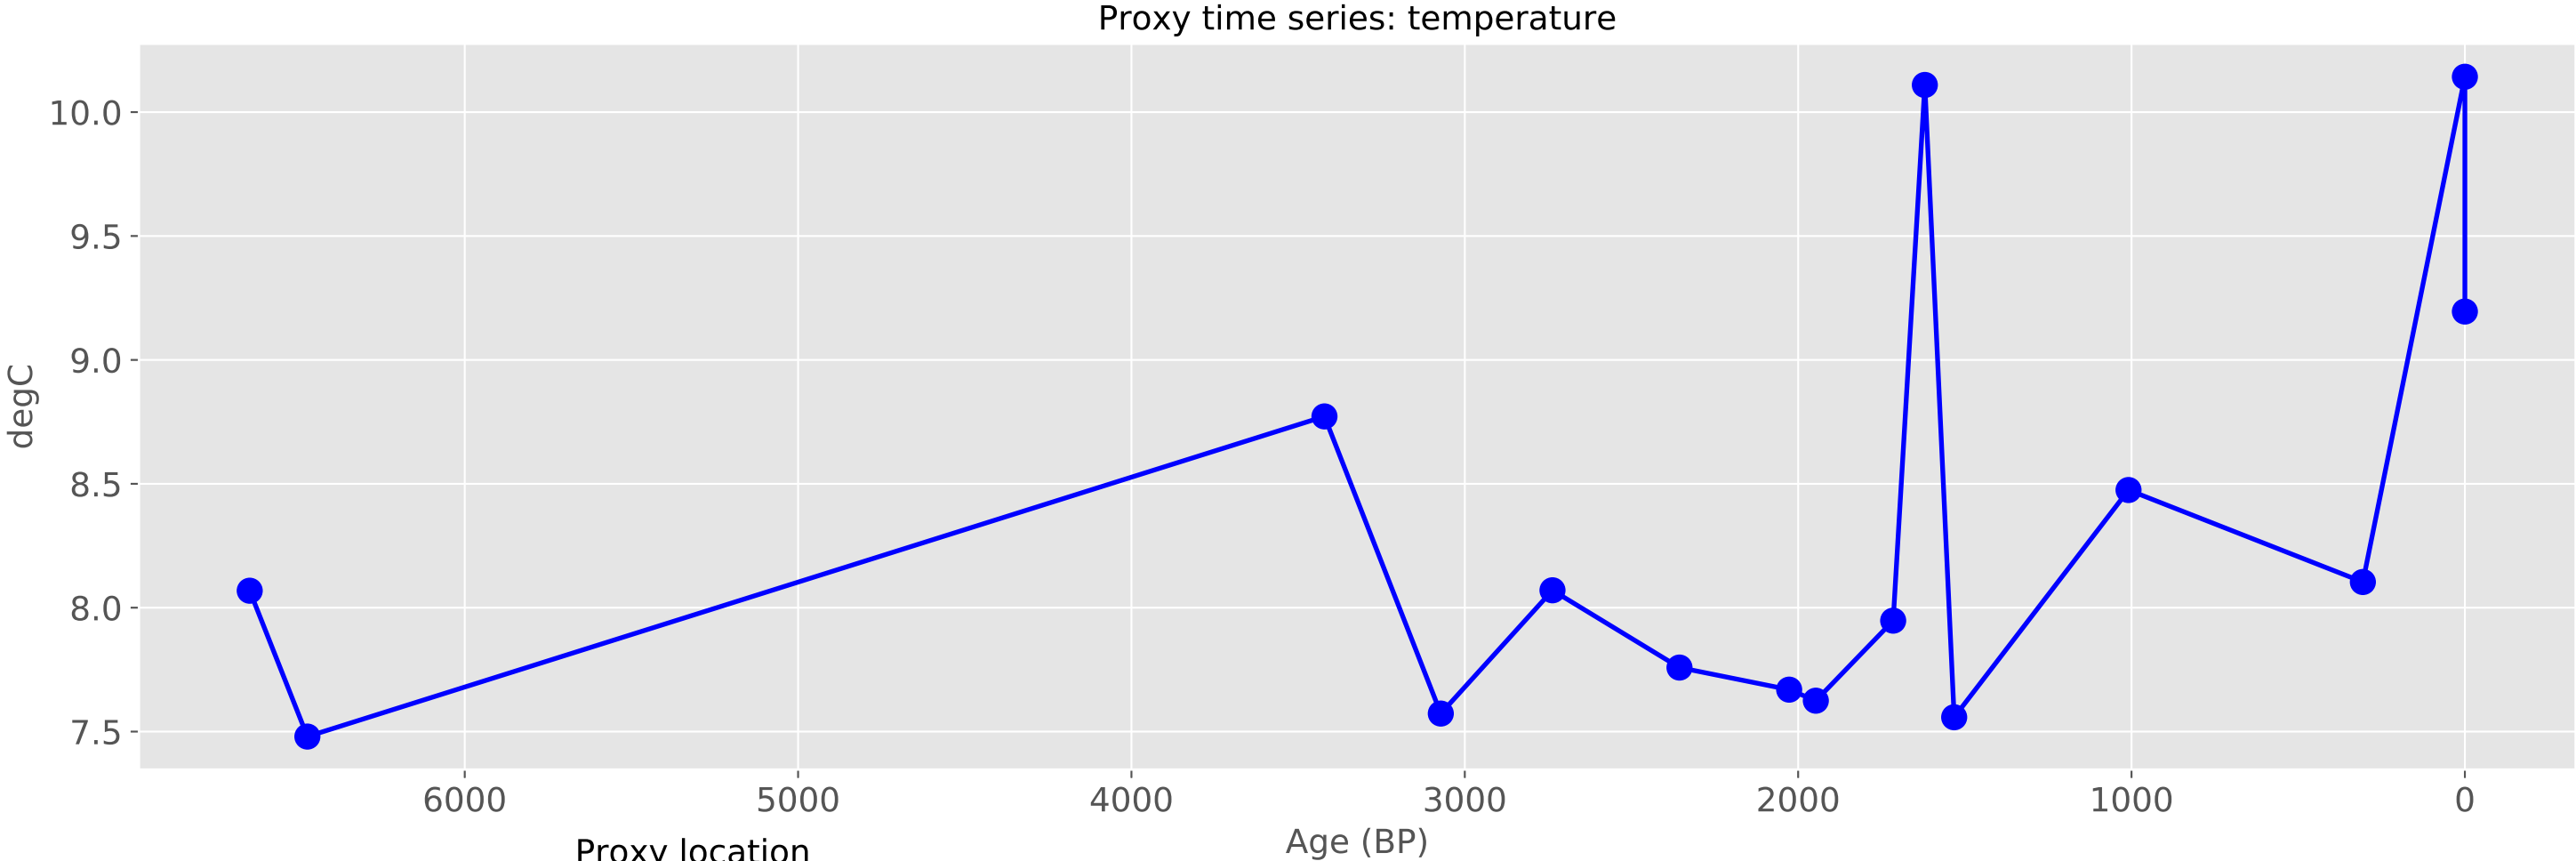

|                    |                                                       |
|--------------------|-------------------------------------------------------|
| Dataset name:      | MiddenCluster4.Harbert.2018                           |
| Archive type:      | Midden                                                |
| Proxy type:        | macrofossils                                          |
| Variable name:     | temperature                                           |
| Latitude ( ° N):   | 43.6488                                               |
| Longitude ( ° E):  | -112.7451                                             |
| Elevation (m):     | 1517.0                                                |
| Interp. variable:  | T                                                     |
| Interp. detail:    | air@surface                                           |
| Interp. season:    | annual                                                |
| Interp. direction: | positive                                              |
| Pub. 1 title:      | Quantitative Late Quaternary climate reconstructio... |
| Pub. 1 authors:    | Harbert, Robert S.; Nixon, Kevin C.                   |
| Pub. 1 year:       | 2018                                                  |
| Pub. 1 DOI:        | 10.5334/oq.46                                         |
| Original data URL: | geochange.er.usgs.gov/midden/                         |

Proxy data and metadata

Midden | macrofossils | MiddenCluster1.Harbert.2018 | WEB25ae3120

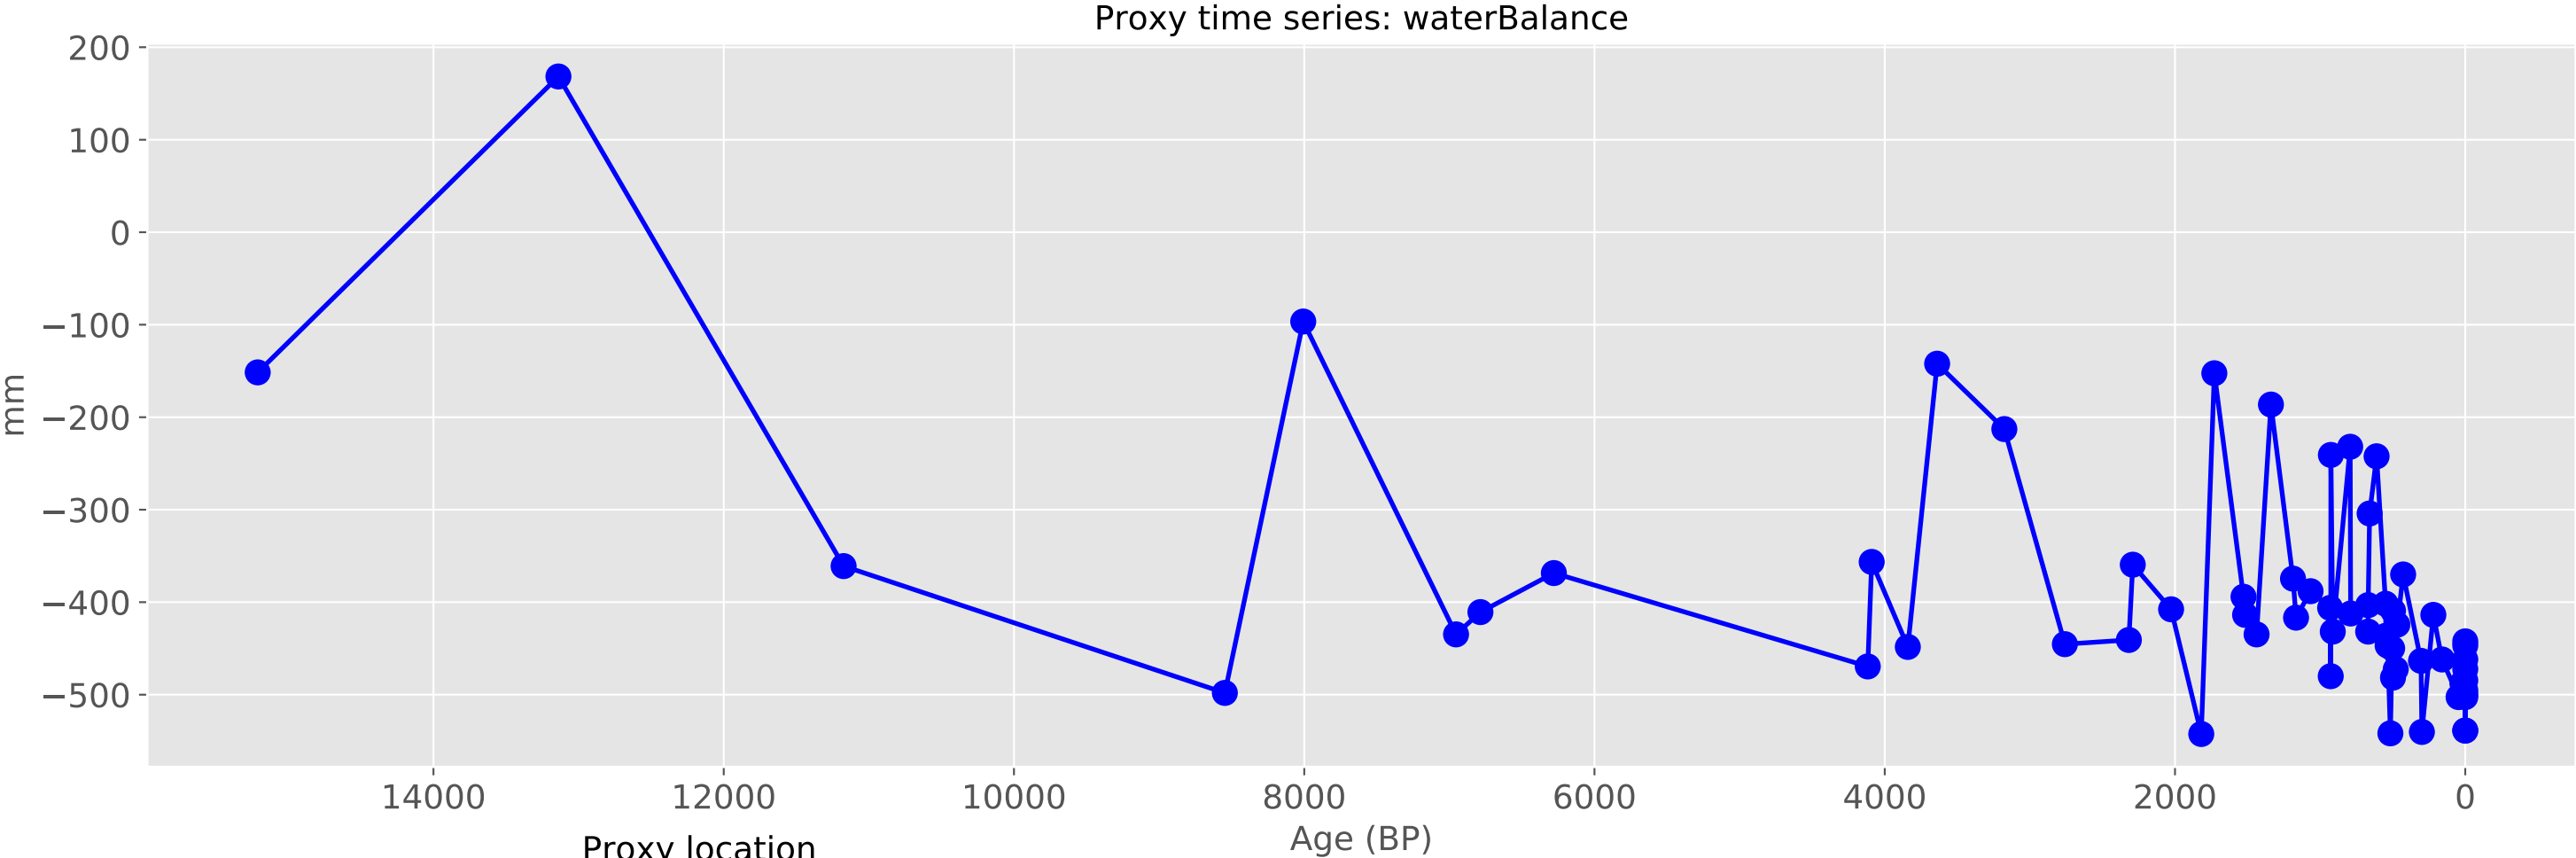

Proxy location  
(37.90° N, 110.13° W)

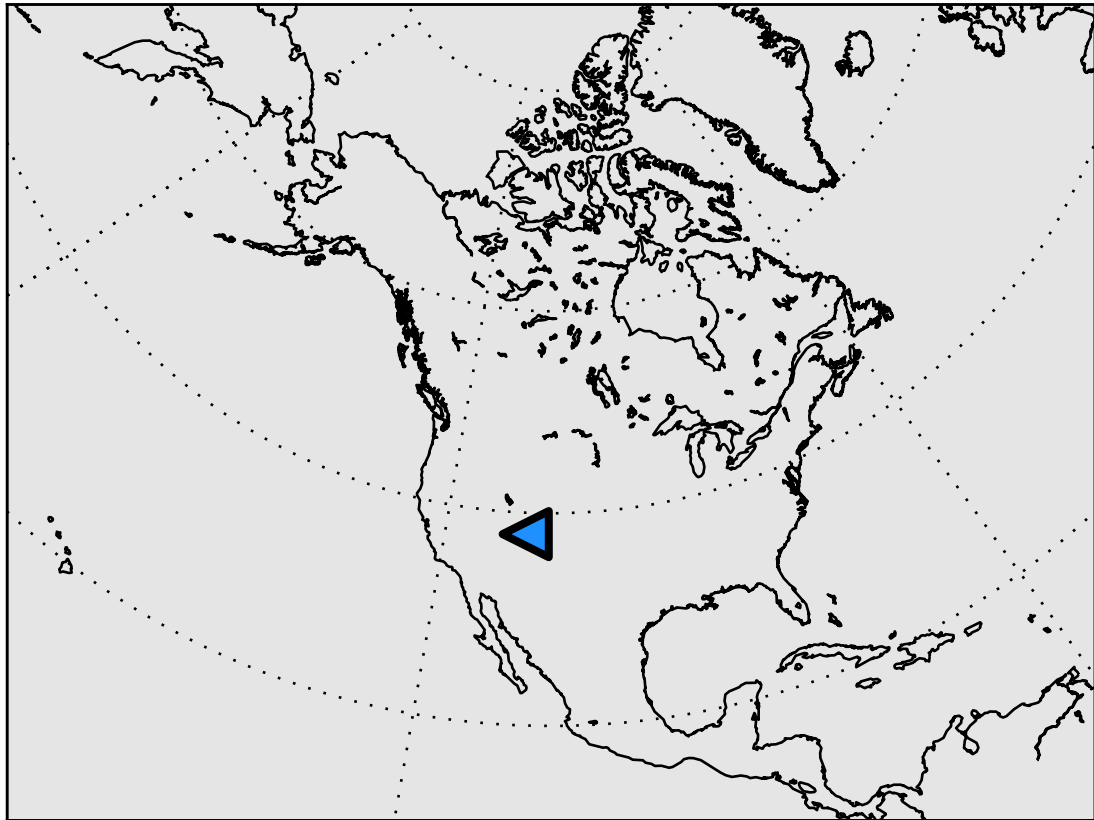

|                    |                                                       |
|--------------------|-------------------------------------------------------|
| Dataset name:      | MiddenCluster1.Harbert.2018                           |
| Archive type:      | Midden                                                |
| Proxy type:        | macrofossils                                          |
| Variable name:     | waterBalance                                          |
| Latitude (° N):    | 37.9049                                               |
| Longitude (° E):   | -110.1304                                             |
| Elevation (m):     | 1835.0                                                |
| Interp. variable:  | P-E                                                   |
| Interp. detail:    | @surface                                              |
| Interp. season:    | annual                                                |
| Interp. direction: | positive                                              |
| Pub. 1 title:      | Quantitative Late Quaternary climate reconstructio... |
| Pub. 1 authors:    | Harbert, Robert S.; Nixon, Kevin C.                   |
| Pub. 1 year:       | 2018                                                  |
| Pub. 1 DOI:        | 10.5334/oq.46                                         |
| Original data URL: | geochange.er.usgs.gov/midden/                         |

Proxy data and metadata

Midden | macrofossils | MiddenCluster1.Harbert.2018 | WEB613ee041

Proxy time series: precipitation

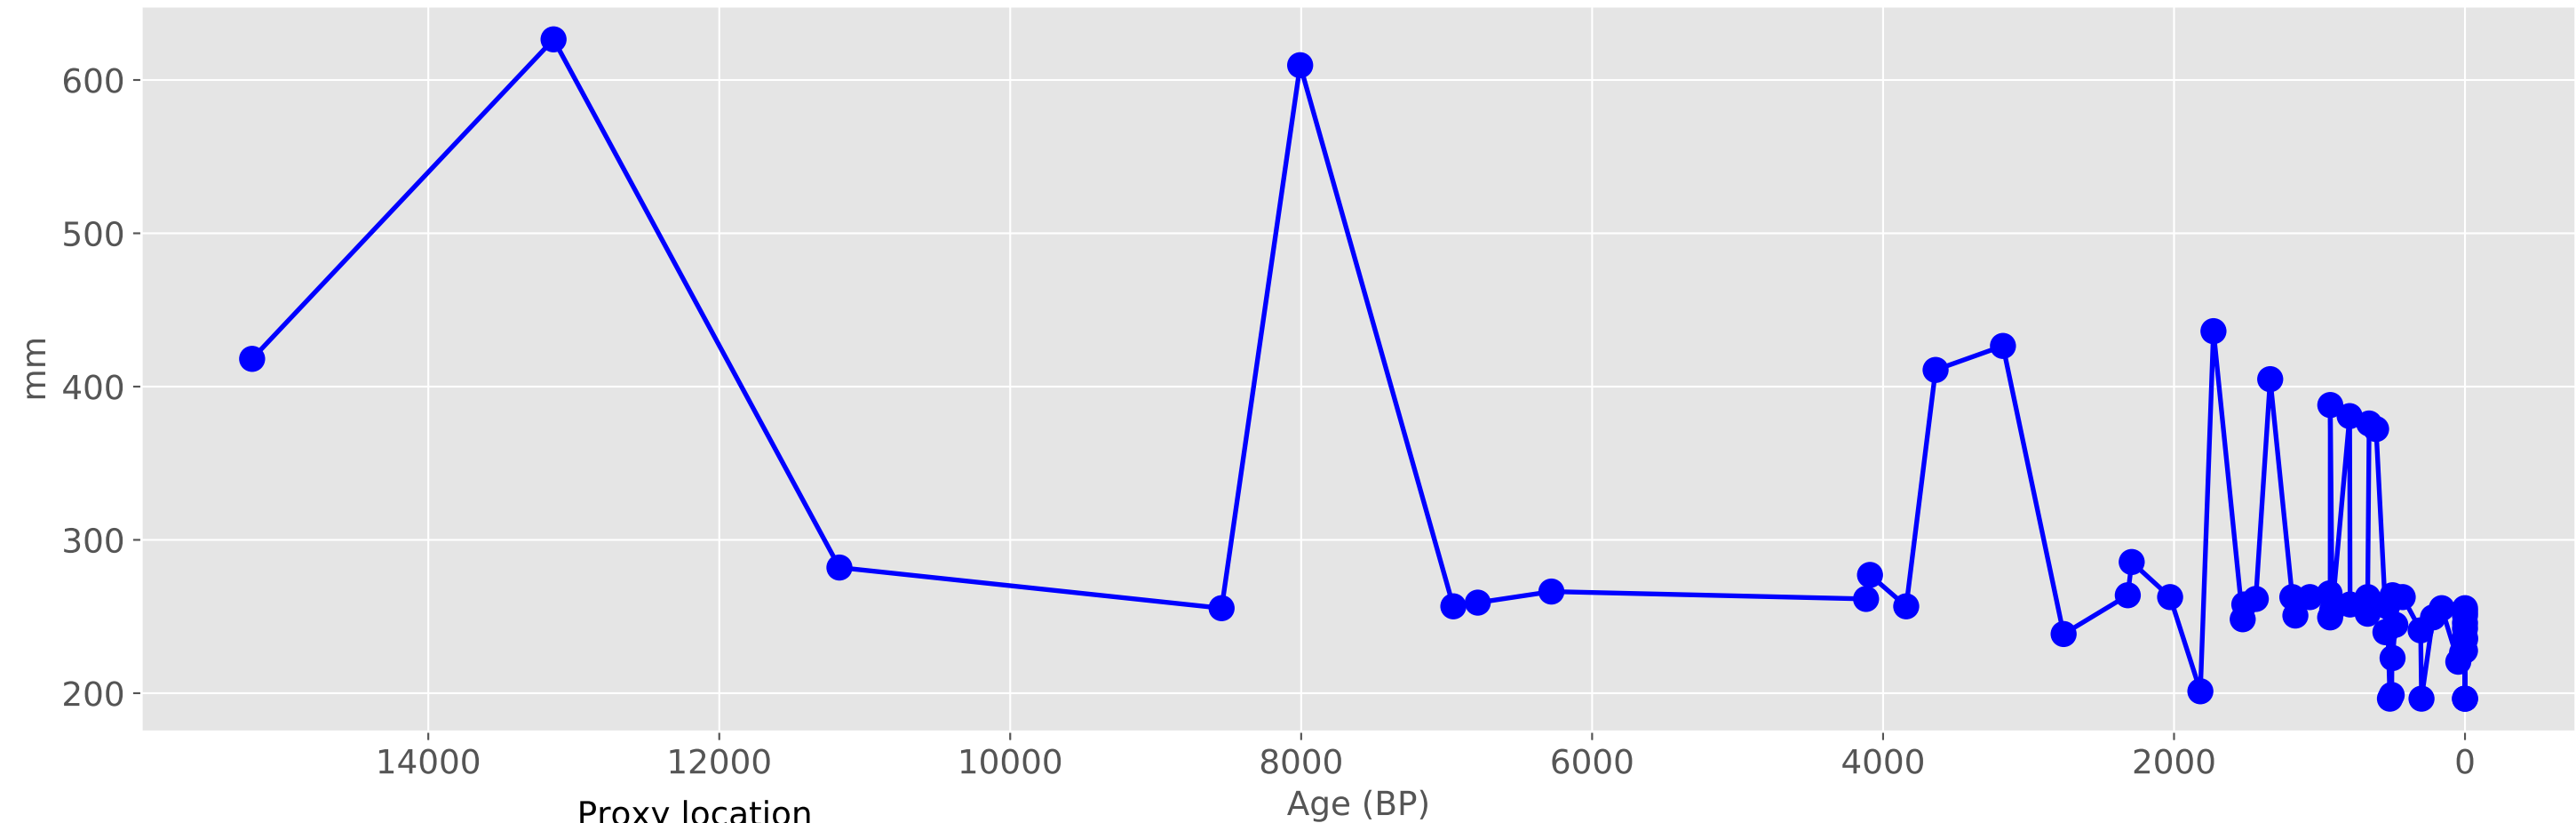

Proxy location  
(37.90° N, 110.13° W)

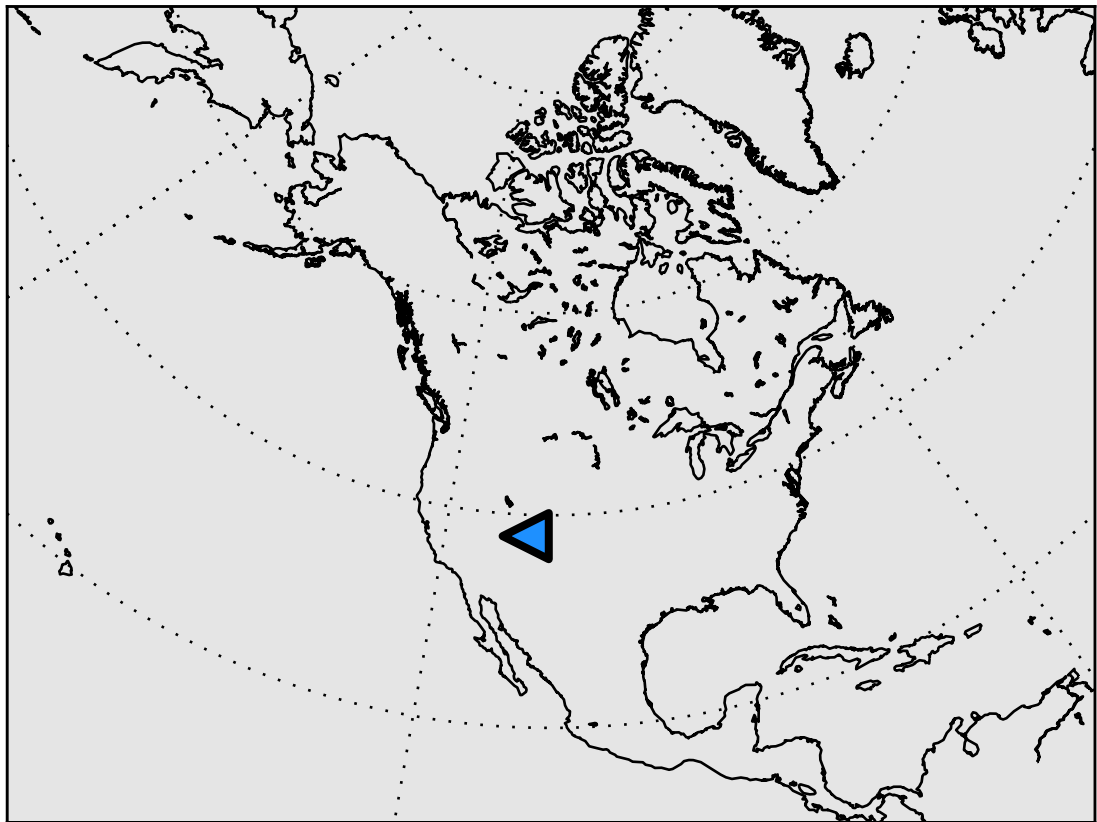

|                    |                                                       |
|--------------------|-------------------------------------------------------|
| Dataset name:      | MiddenCluster1.Harbert.2018                           |
| Archive type:      | Midden                                                |
| Proxy type:        | macrofossils                                          |
| Variable name:     | precipitation                                         |
| Latitude (° N):    | 37.9049                                               |
| Longitude (° E):   | -110.1304                                             |
| Elevation (m):     | 1835.0                                                |
| Interp. variable:  | P                                                     |
| Interp. detail:    | amount@surface                                        |
| Interp. season:    | annual                                                |
| Interp. direction: | positive                                              |
| Pub. 1 title:      | Quantitative Late Quaternary climate reconstructio... |
| Pub. 1 authors:    | Harbert, Robert S.; Nixon, Kevin C.                   |
| Pub. 1 year:       | 2018                                                  |
| Pub. 1 DOI:        | 10.5334/oq.46                                         |
| Original data URL: | geochange.er.usgs.gov/midden/                         |



Proxy data and metadata

Midden | macrofossils | MiddenCluster1.Harbert.2018 | WEBa31332021

Proxy time series: temperature

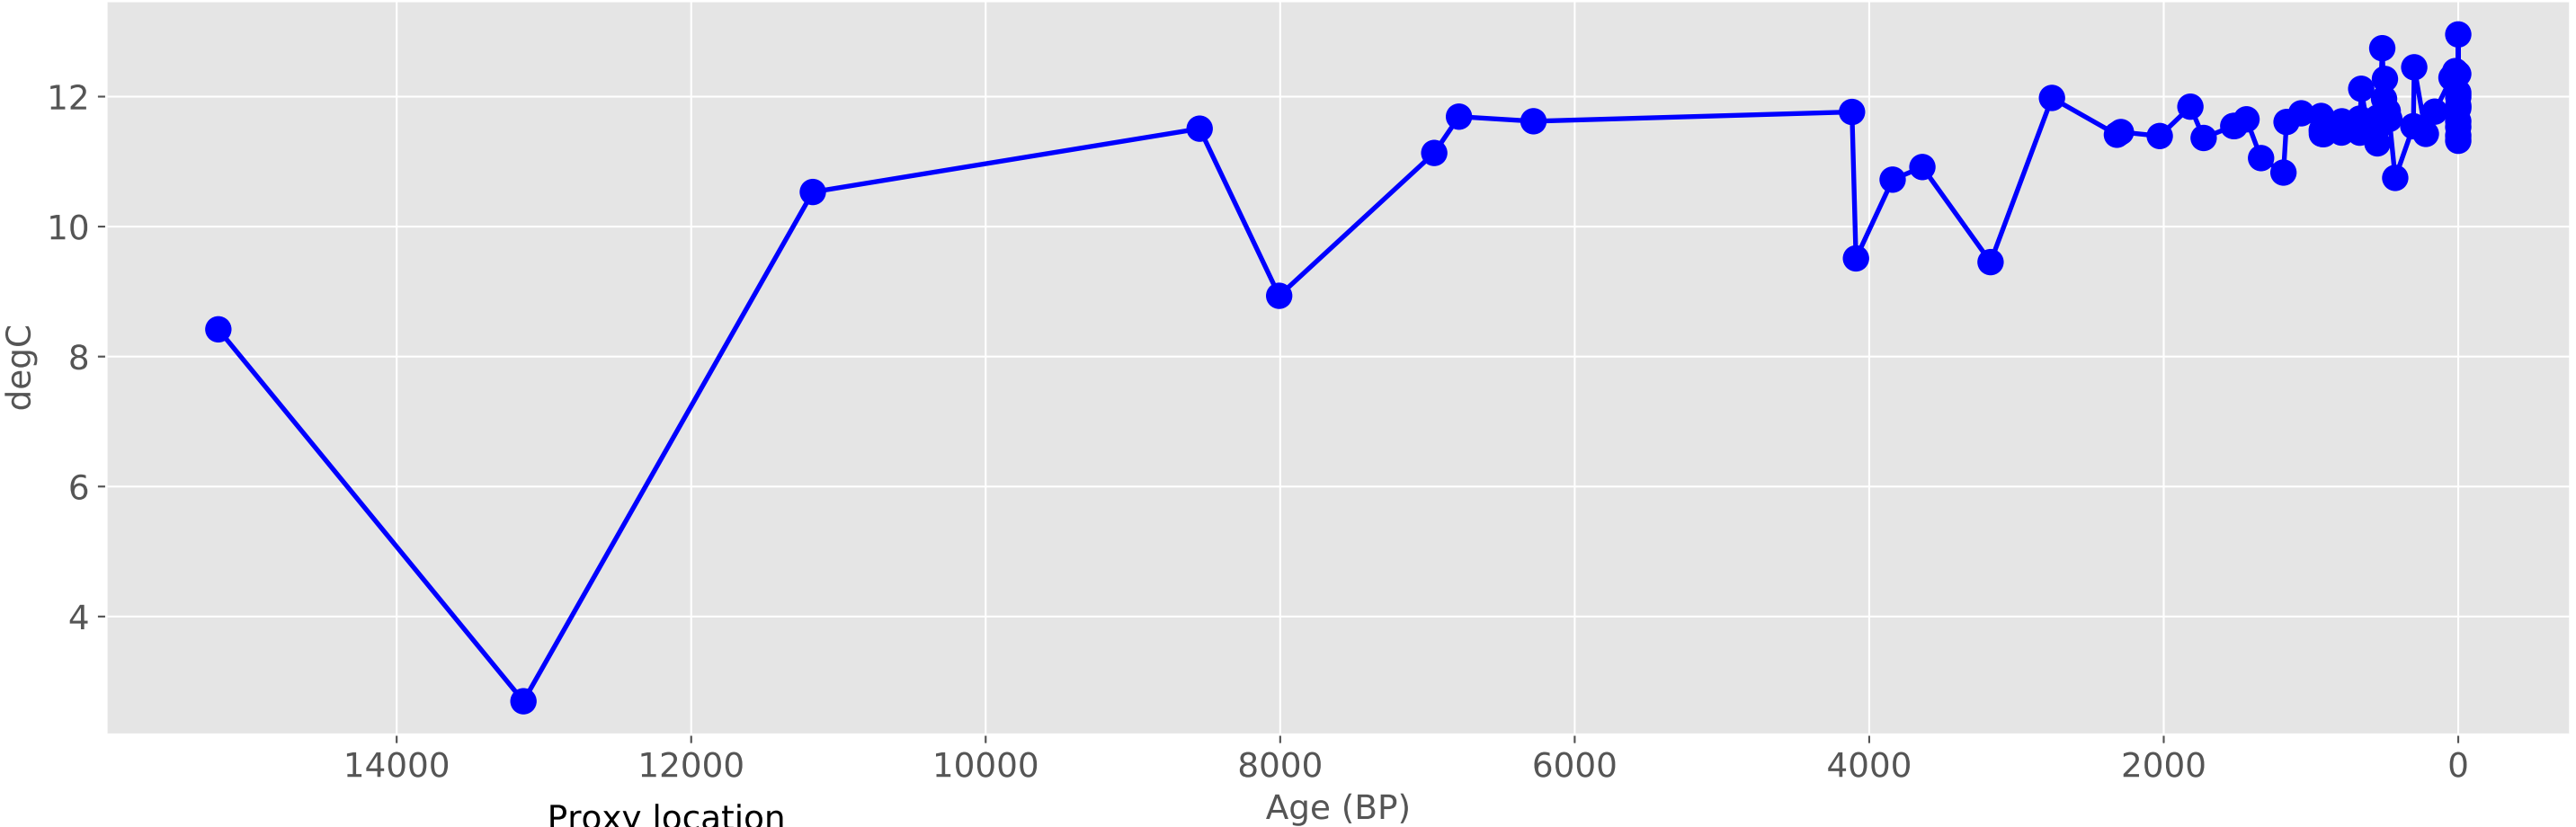

Proxy location  
(37.90° N, 110.13° W)



|                    |                                                       |
|--------------------|-------------------------------------------------------|
| Dataset name:      | MiddenCluster1.Harbert.2018                           |
| Archive type:      | Midden                                                |
| Proxy type:        | macrofossils                                          |
| Variable name:     | temperature                                           |
| Latitude (° N):    | 37.9049                                               |
| Longitude (° E):   | -110.1304                                             |
| Elevation (m):     | 1835.0                                                |
| Interp. variable:  | T                                                     |
| Interp. detail:    | air@surface                                           |
| Interp. season:    | annual                                                |
| Interp. direction: | positive                                              |
| Pub. 1 title:      | Quantitative Late Quaternary climate reconstructio... |
| Pub. 1 authors:    | Harbert, Robert S.; Nixon, Kevin C.                   |
| Pub. 1 year:       | 2018                                                  |
| Pub. 1 DOI:        | 10.5334/oq.46                                         |
| Original data URL: | geochange.er.usgs.gov/midden/                         |

Proxy data and metadata  
Midden | macrofossils | MiddenCluster2.Harbert.2018 | WEB85c563b9

Proxy time series: precipitation

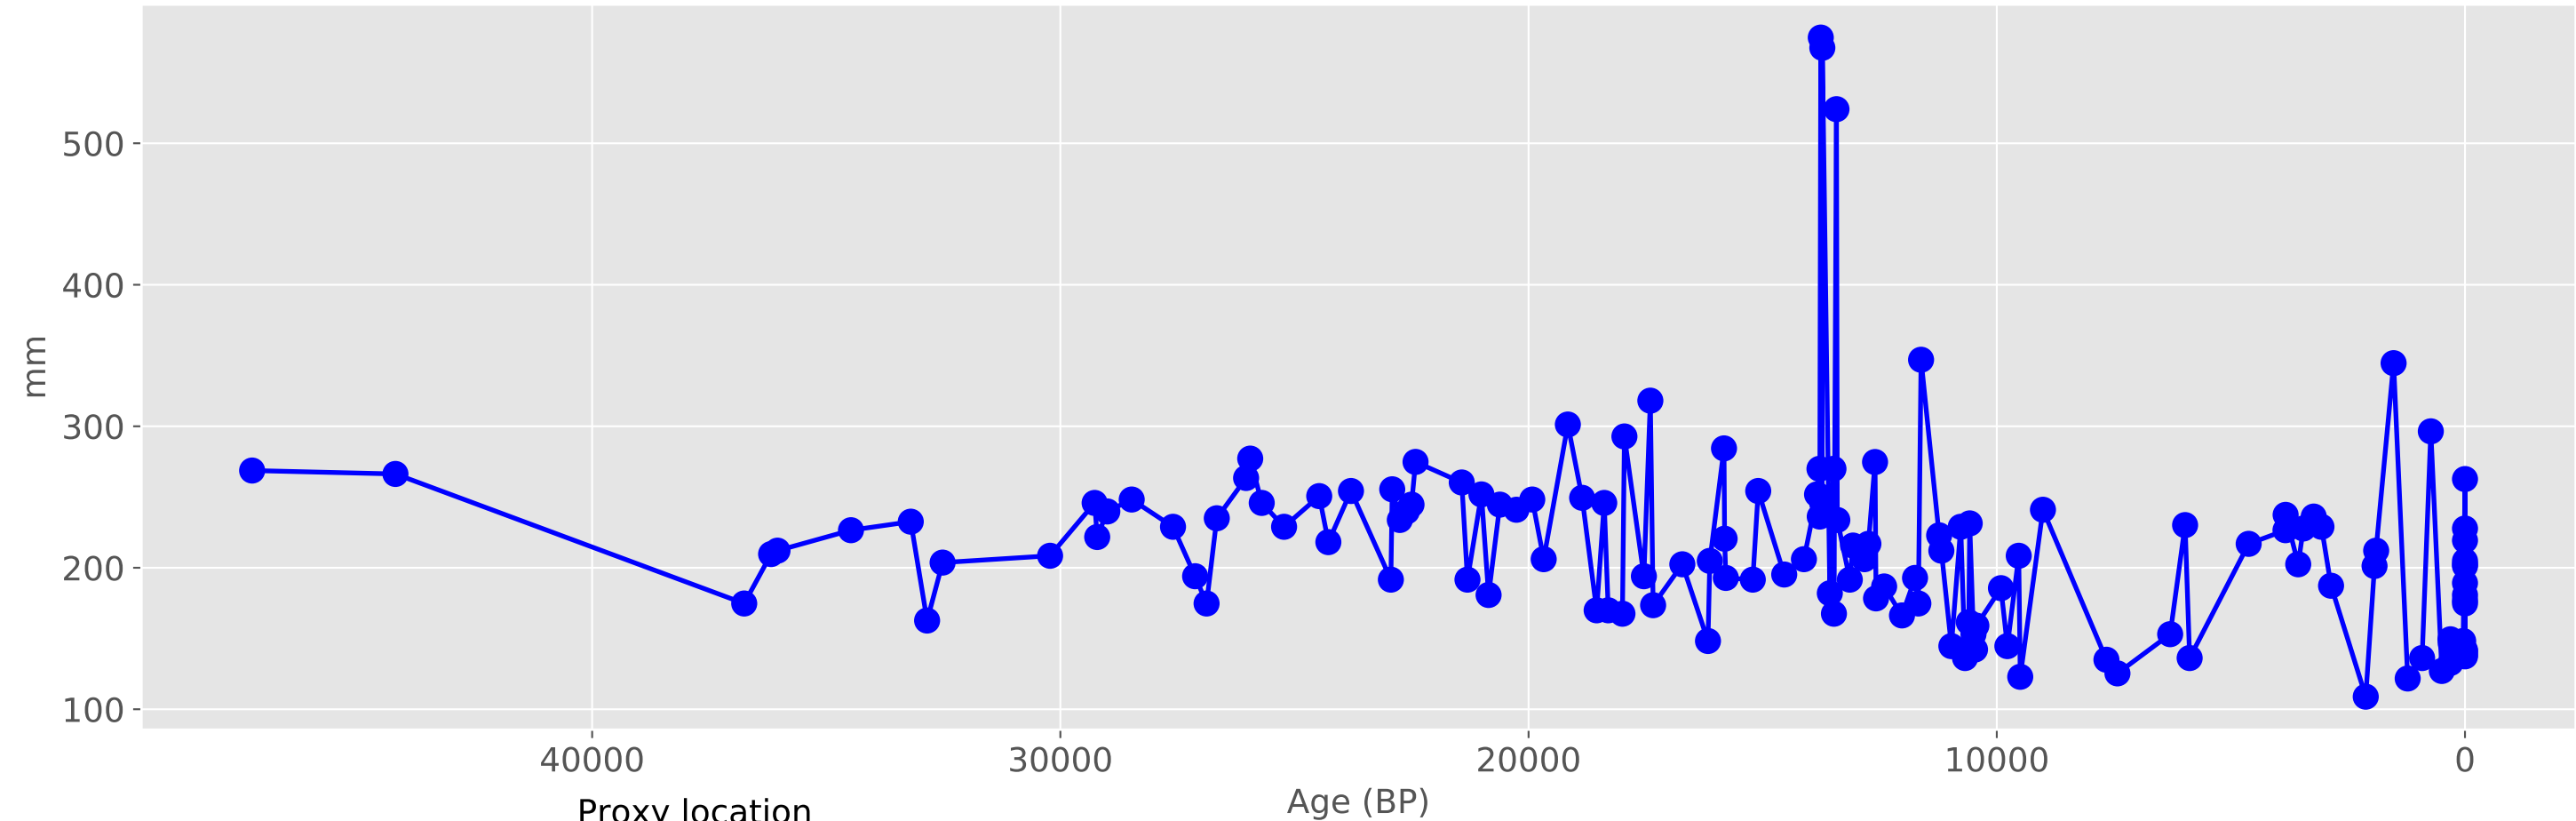

Proxy location  
(36.38 ° N, 115.19 ° W)

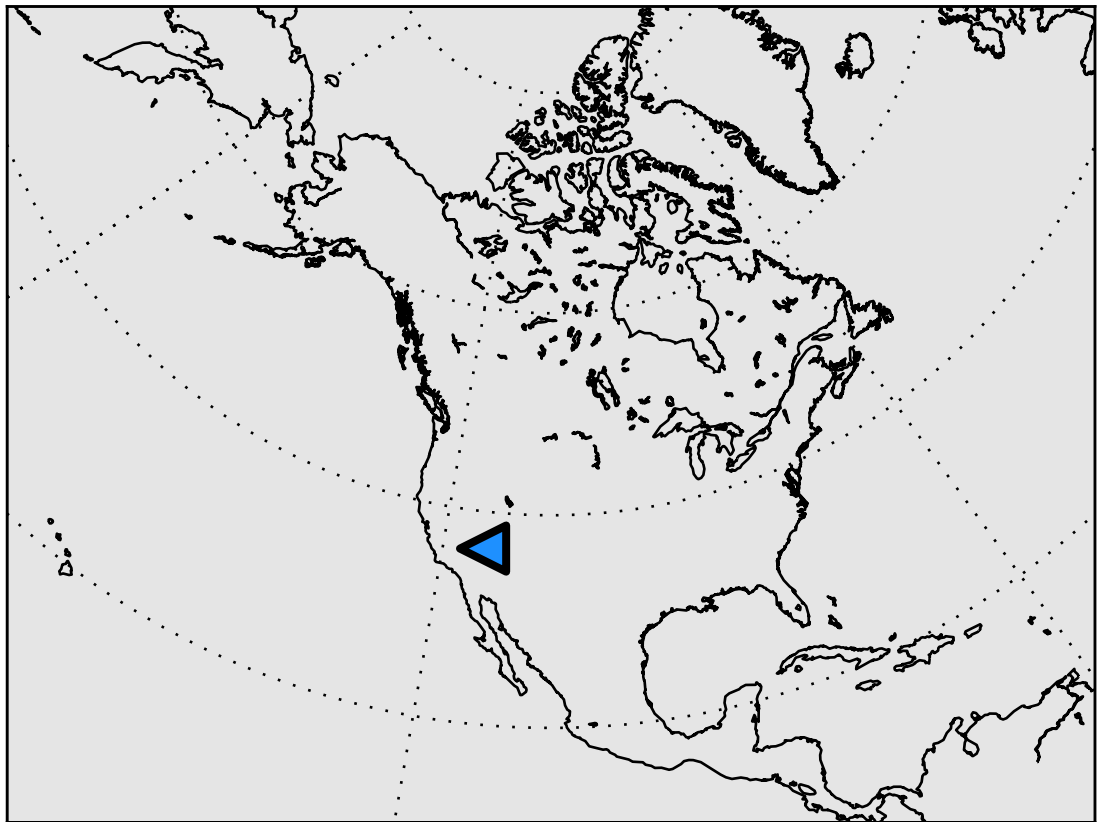

|                    |                                                       |
|--------------------|-------------------------------------------------------|
| Dataset name:      | MiddenCluster2.Harbert.2018                           |
| Archive type:      | Midden                                                |
| Proxy type:        | macrofossils                                          |
| Variable name:     | precipitation                                         |
| Latitude ( ° N):   | 36.3806                                               |
| Longitude ( ° E):  | -115.1879                                             |
| Elevation (m):     | 1297.0                                                |
| Interp. variable:  | P                                                     |
| Interp. detail:    | amount@surface                                        |
| Interp. season:    | annual                                                |
| Interp. direction: | positive                                              |
| Pub. 1 title:      | Quantitative Late Quaternary climate reconstructio... |
| Pub. 1 authors:    | Harbert, Robert S.; Nixon, Kevin C.                   |
| Pub. 1 year:       | 2018                                                  |
| Pub. 1 DOI:        | 10.5334/oq.46                                         |
| Original data URL: | geochange.er.usgs.gov/midden/                         |

Proxy data and metadata  
Midden | macrofossils | MiddenCluster2.Harbert.2018 | WEBa31332022

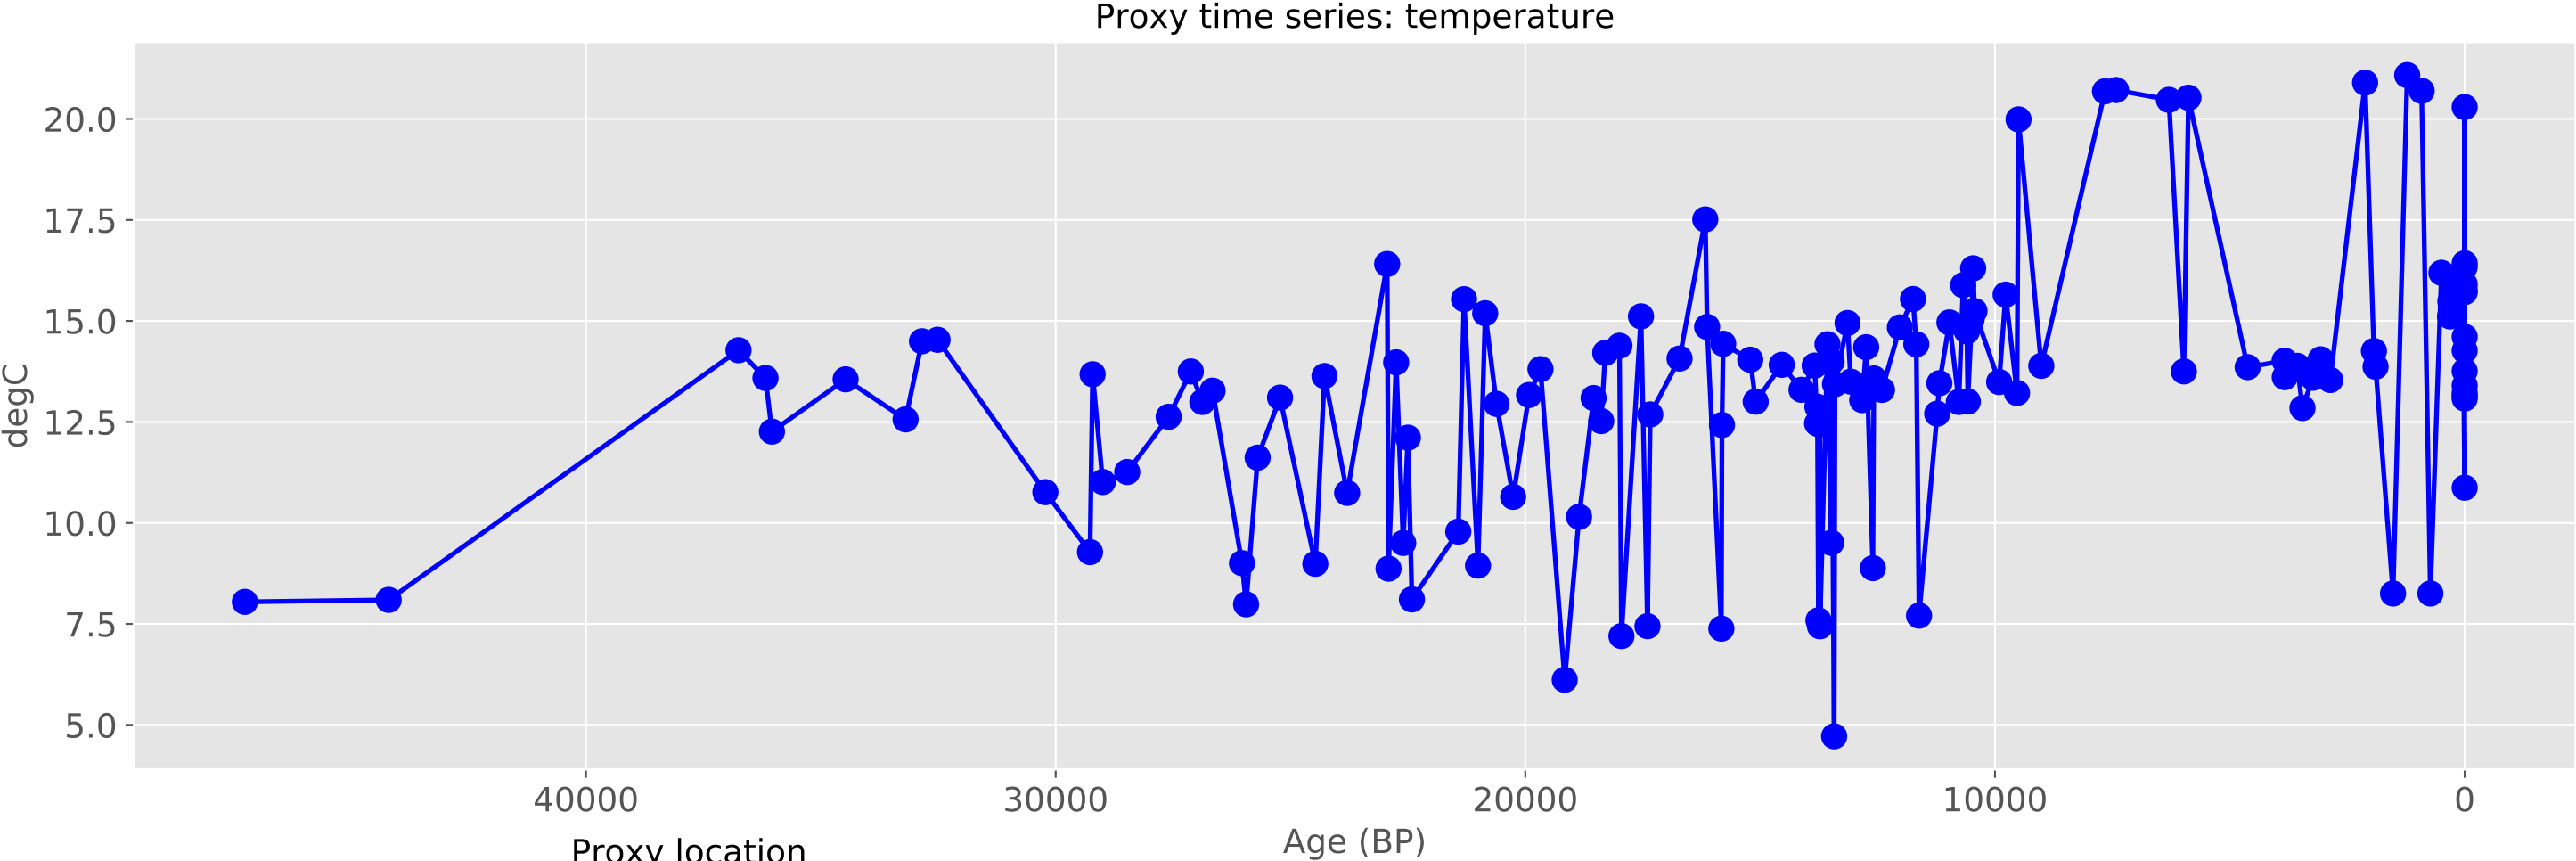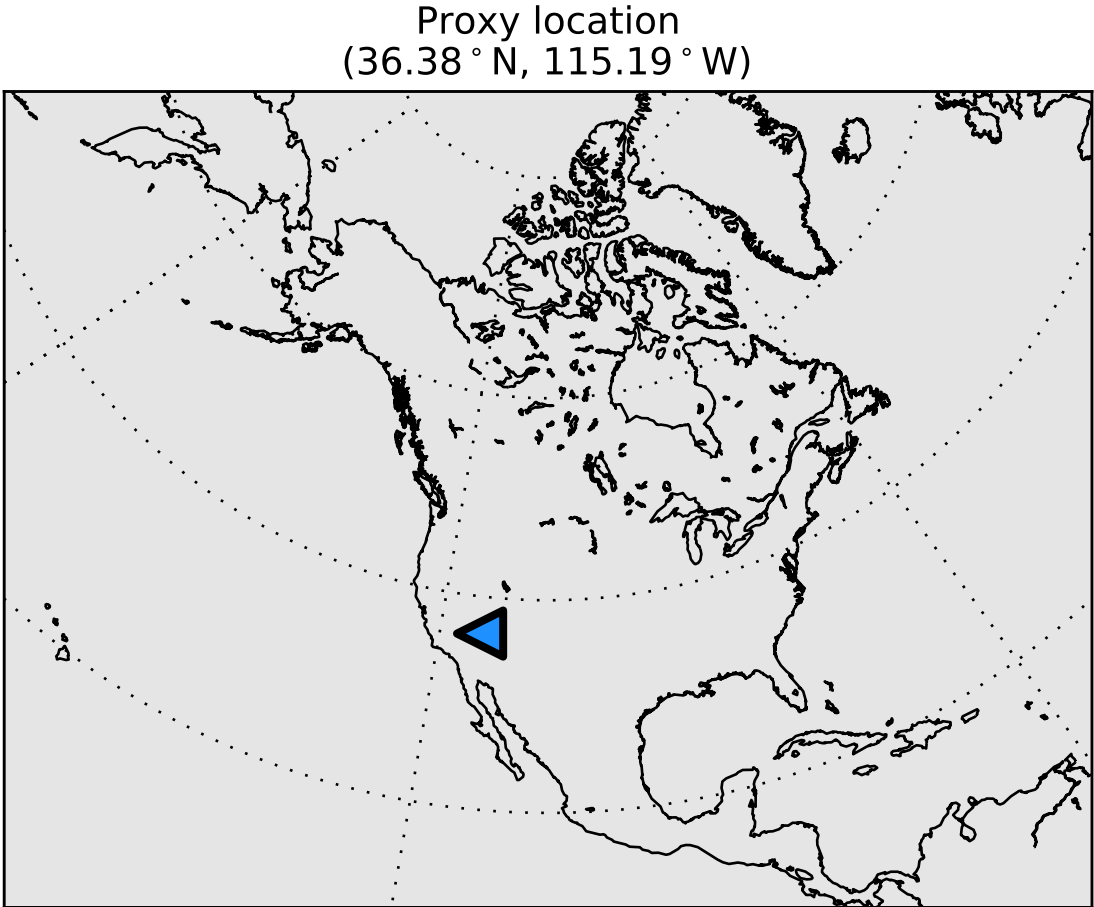

|                    |                                                       |
|--------------------|-------------------------------------------------------|
| Dataset name:      | MiddenCluster2.Harbert.2018                           |
| Archive type:      | Midden                                                |
| Proxy type:        | macrofossils                                          |
| Variable name:     | temperature                                           |
| Latitude ( ° N):   | 36.3806                                               |
| Longitude ( ° E):  | -115.1879                                             |
| Elevation (m):     | 1297.0                                                |
| Interp. variable:  | T                                                     |
| Interp. detail:    | air@surface                                           |
| Interp. season:    | annual                                                |
| Interp. direction: | positive                                              |
| Pub. 1 title:      | Quantitative Late Quaternary climate reconstructio... |
| Pub. 1 authors:    | Harbert, Robert S.; Nixon, Kevin C.                   |
| Pub. 1 year:       | 2018                                                  |
| Pub. 1 DOI:        | 10.5334/oq.46                                         |
| Original data URL: | geochange.er.usgs.gov/midden/                         |

Proxy data and metadata

Midden | macrofossils | MiddenCluster2.Harbert.2018 | WEBc9823492

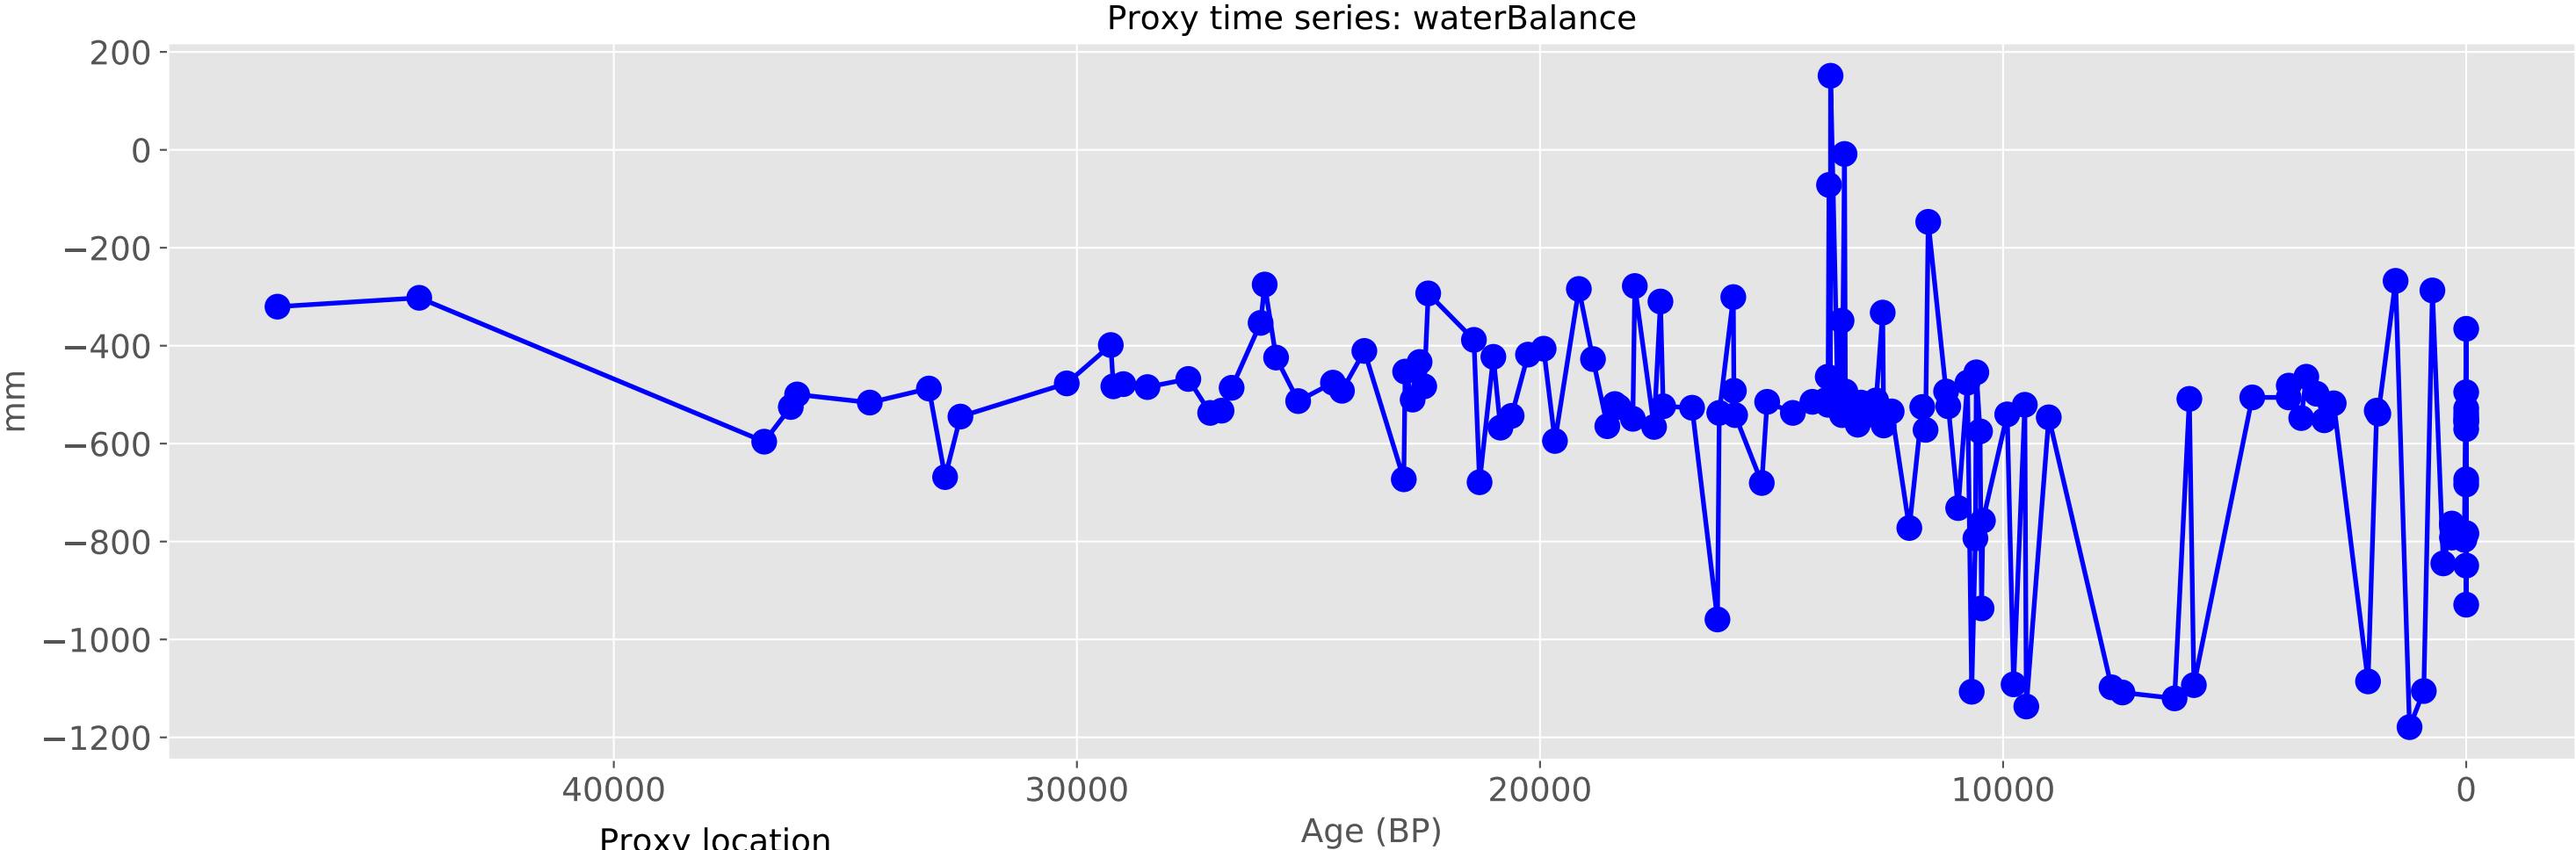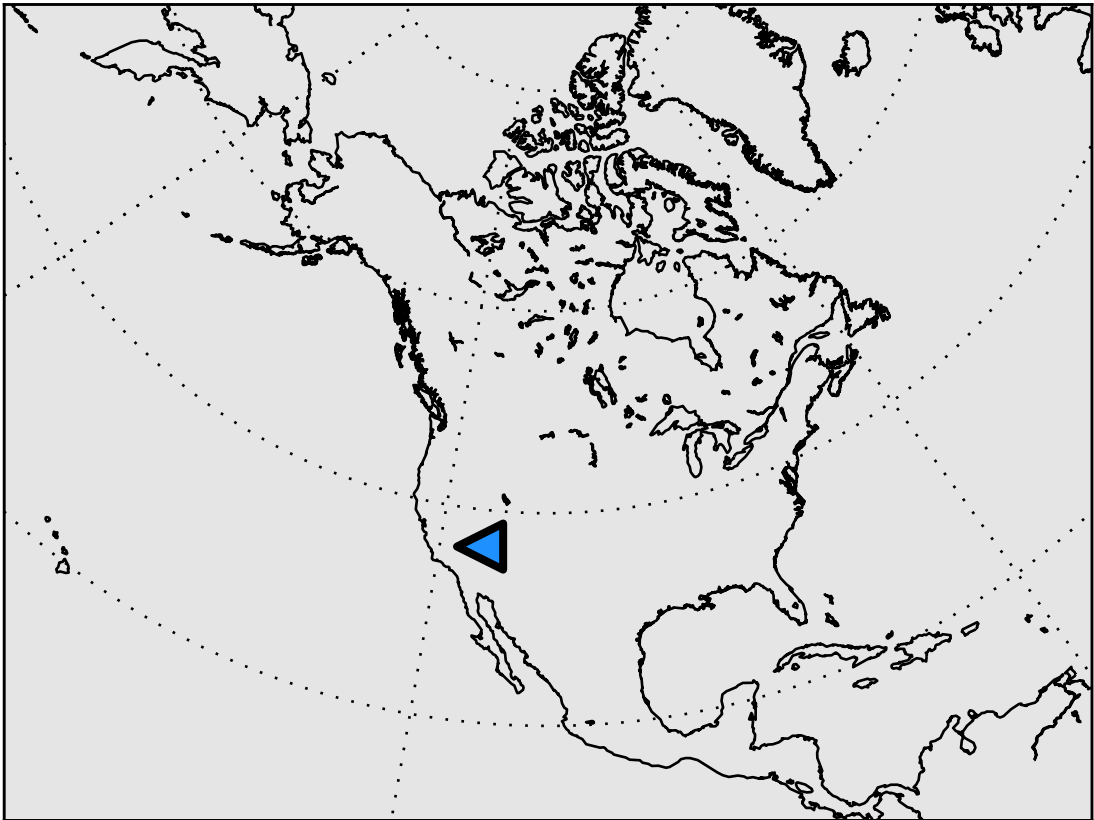

|                    |                                                       |
|--------------------|-------------------------------------------------------|
| Dataset name:      | MiddenCluster2.Harbert.2018                           |
| Archive type:      | Midden                                                |
| Proxy type:        | macrofossils                                          |
| Variable name:     | waterBalance                                          |
| Latitude ( ° N):   | 36.3806                                               |
| Longitude ( ° E):  | -115.1879                                             |
| Elevation (m):     | 1297.0                                                |
| Interp. variable:  | P-E                                                   |
| Interp. detail:    | @surface                                              |
| Interp. season:    | annual                                                |
| Interp. direction: | positive                                              |
| Pub. 1 title:      | Quantitative Late Quaternary climate reconstructio... |
| Pub. 1 authors:    | Harbert, Robert S.; Nixon, Kevin C.                   |
| Pub. 1 year:       | 2018                                                  |
| Pub. 1 DOI:        | 10.5334/oq.46                                         |
| Original data URL: | geochange.er.usgs.gov/midden/                         |

Proxy data and metadata

Midden | macrofossils | MiddenCluster3.Harbert.2018 | WEB7f9af5c1

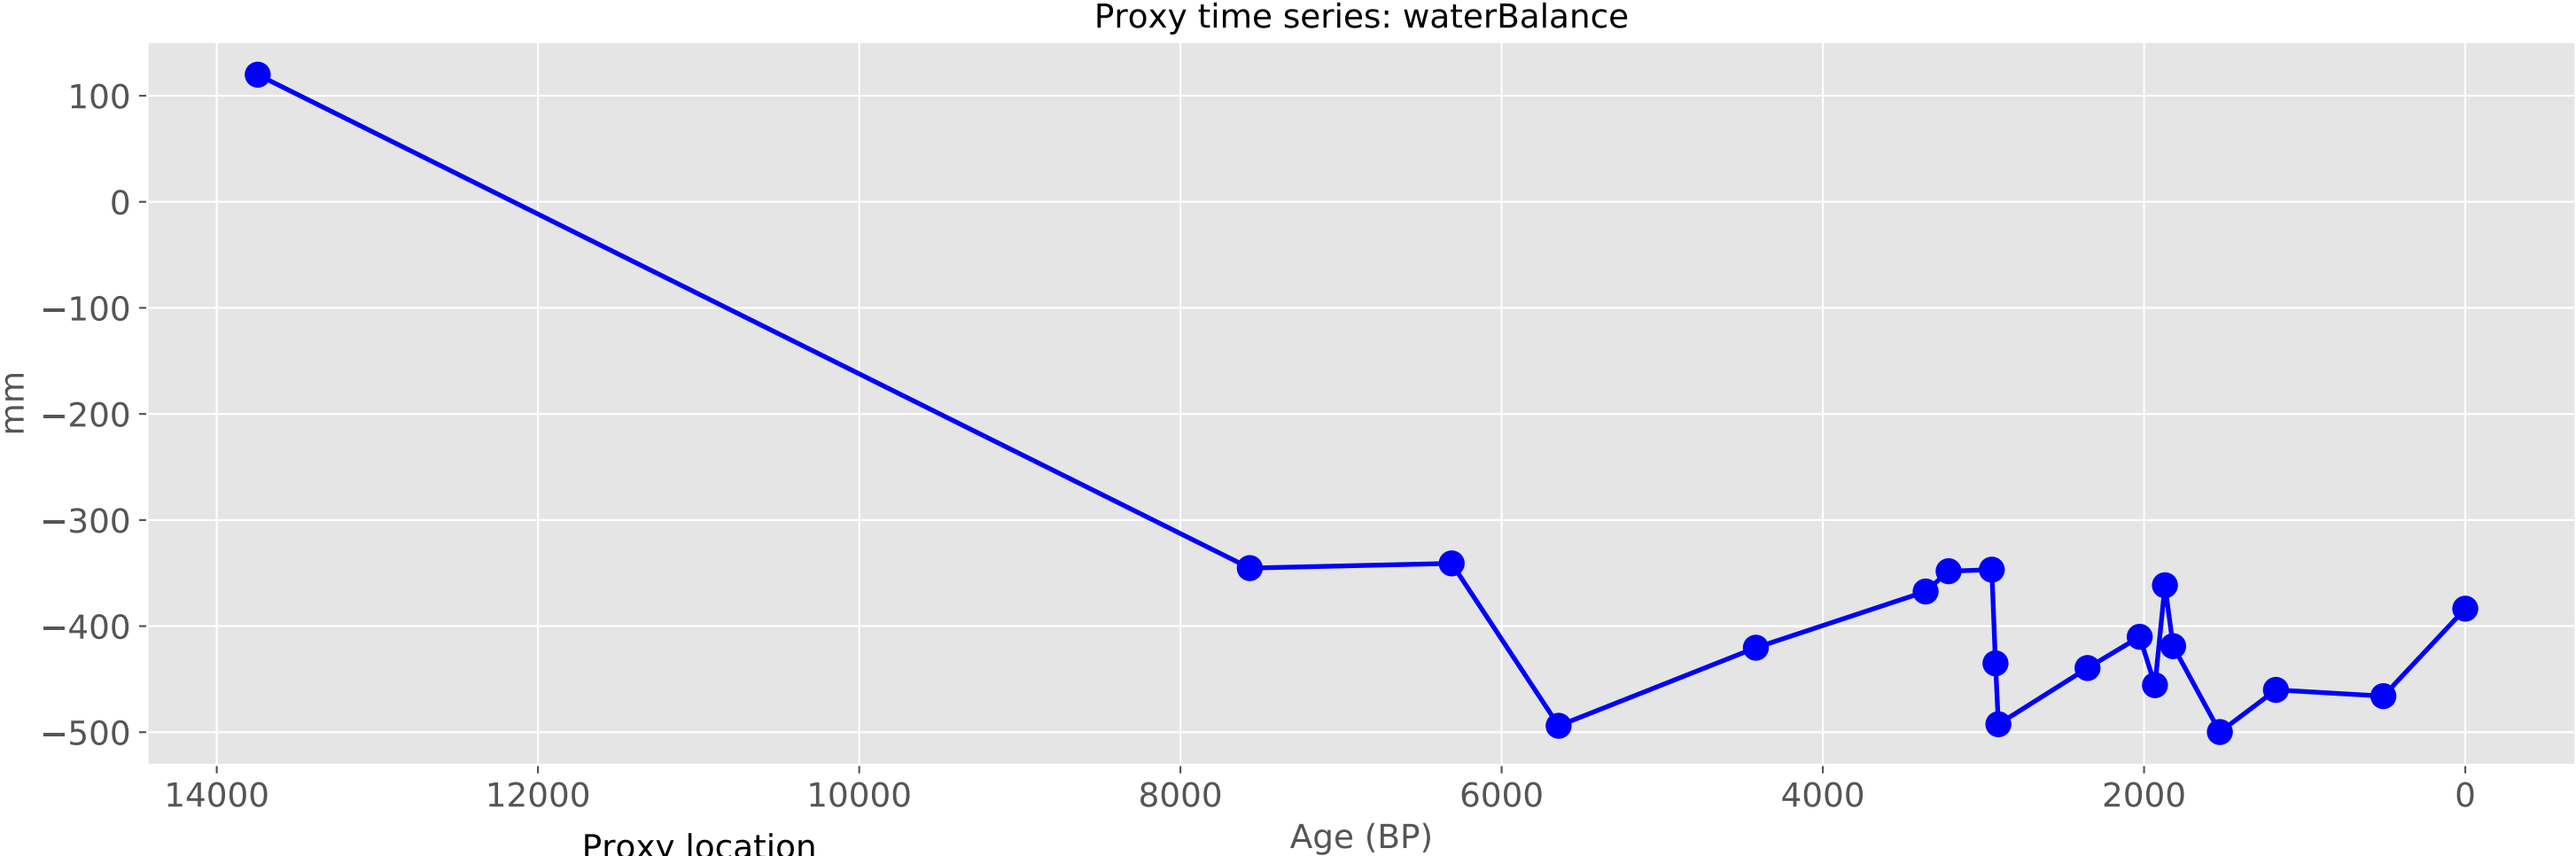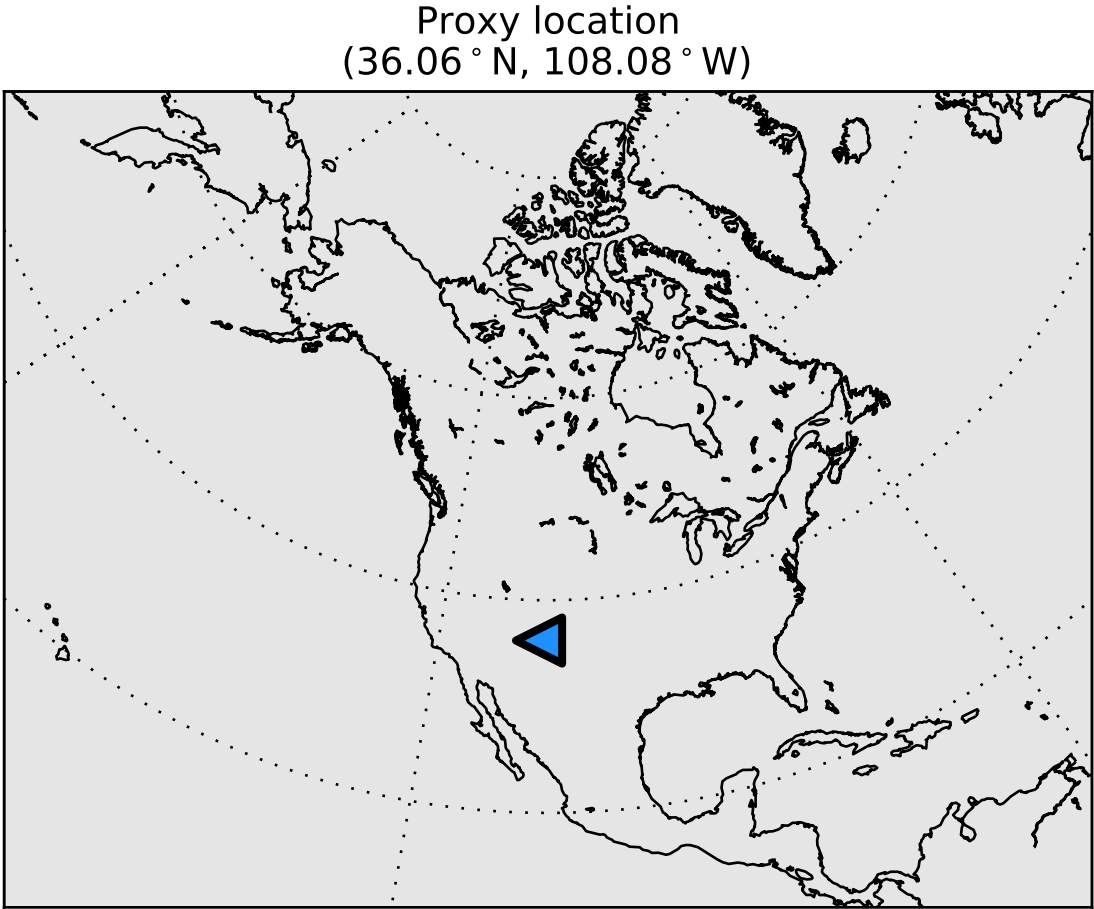

|                    |                                                       |
|--------------------|-------------------------------------------------------|
| Dataset name:      | MiddenCluster3.Harbert.2018                           |
| Archive type:      | Midden                                                |
| Proxy type:        | macrofossils                                          |
| Variable name:     | waterBalance                                          |
| Latitude ( ° N):   | 36.0589                                               |
| Longitude ( ° E):  | -108.0819                                             |
| Elevation (m):     | 1848.0                                                |
| Interp. variable:  | P-E                                                   |
| Interp. detail:    | @surface                                              |
| Interp. season:    | annual                                                |
| Interp. direction: | positive                                              |
| Pub. 1 title:      | Quantitative Late Quaternary climate reconstructio... |
| Pub. 1 authors:    | Harbert, Robert S.; Nixon, Kevin C.                   |
| Pub. 1 year:       | 2018                                                  |
| Pub. 1 DOI:        | 10.5334/oq.46                                         |
| Original data URL: | geochange.er.usgs.gov/midden/                         |

Proxy data and metadata

Midden | macrofossils | MiddenCluster3.Harbert.2018 | WEBa31332023

Proxy time series: temperature

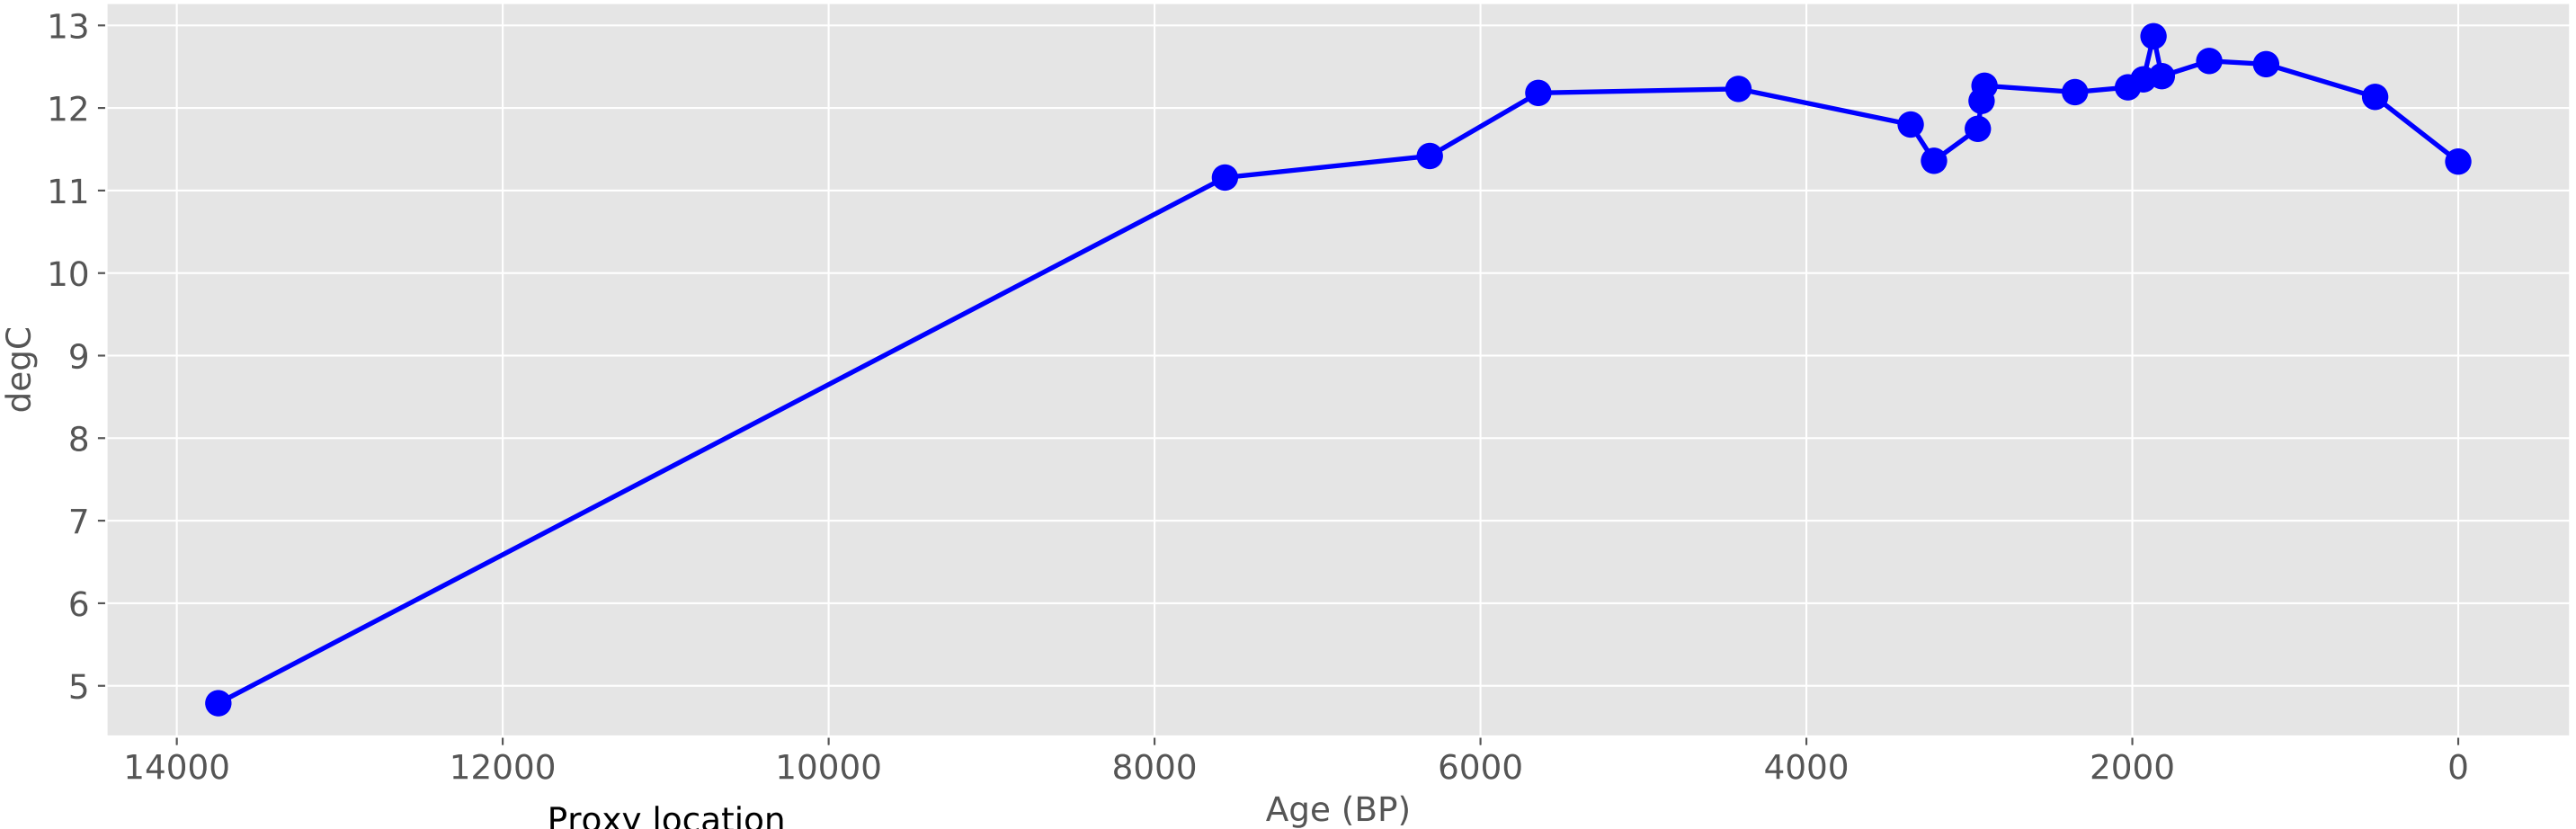

Proxy location  
(36.06 ° N, 108.08 ° W)

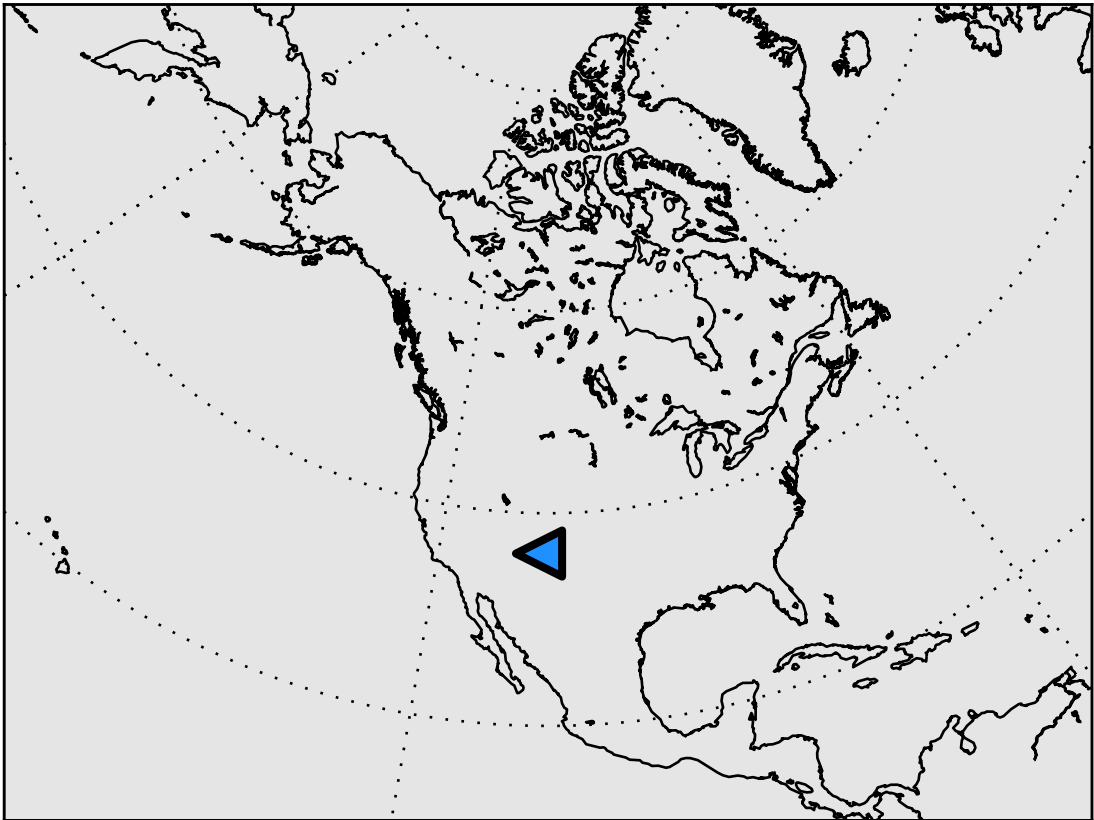

|                    |                                                       |
|--------------------|-------------------------------------------------------|
| Dataset name:      | MiddenCluster3.Harbert.2018                           |
| Archive type:      | Midden                                                |
| Proxy type:        | macrofossils                                          |
| Variable name:     | temperature                                           |
| Latitude ( ° N):   | 36.0589                                               |
| Longitude ( ° E):  | -108.0819                                             |
| Elevation (m):     | 1848.0                                                |
| Interp. variable:  | T                                                     |
| Interp. detail:    | air@surface                                           |
| Interp. season:    | annual                                                |
| Interp. direction: | positive                                              |
| Pub. 1 title:      | Quantitative Late Quaternary climate reconstructio... |
| Pub. 1 authors:    | Harbert, Robert S.; Nixon, Kevin C.                   |
| Pub. 1 year:       | 2018                                                  |
| Pub. 1 DOI:        | 10.5334/oq.46                                         |
| Original data URL: | geochange.er.usgs.gov/midden/                         |



Proxy data and metadata

Midden | macrofossils | MiddenCluster3.Harbert.2018 | WEBb09859f3

Proxy time series: precipitation

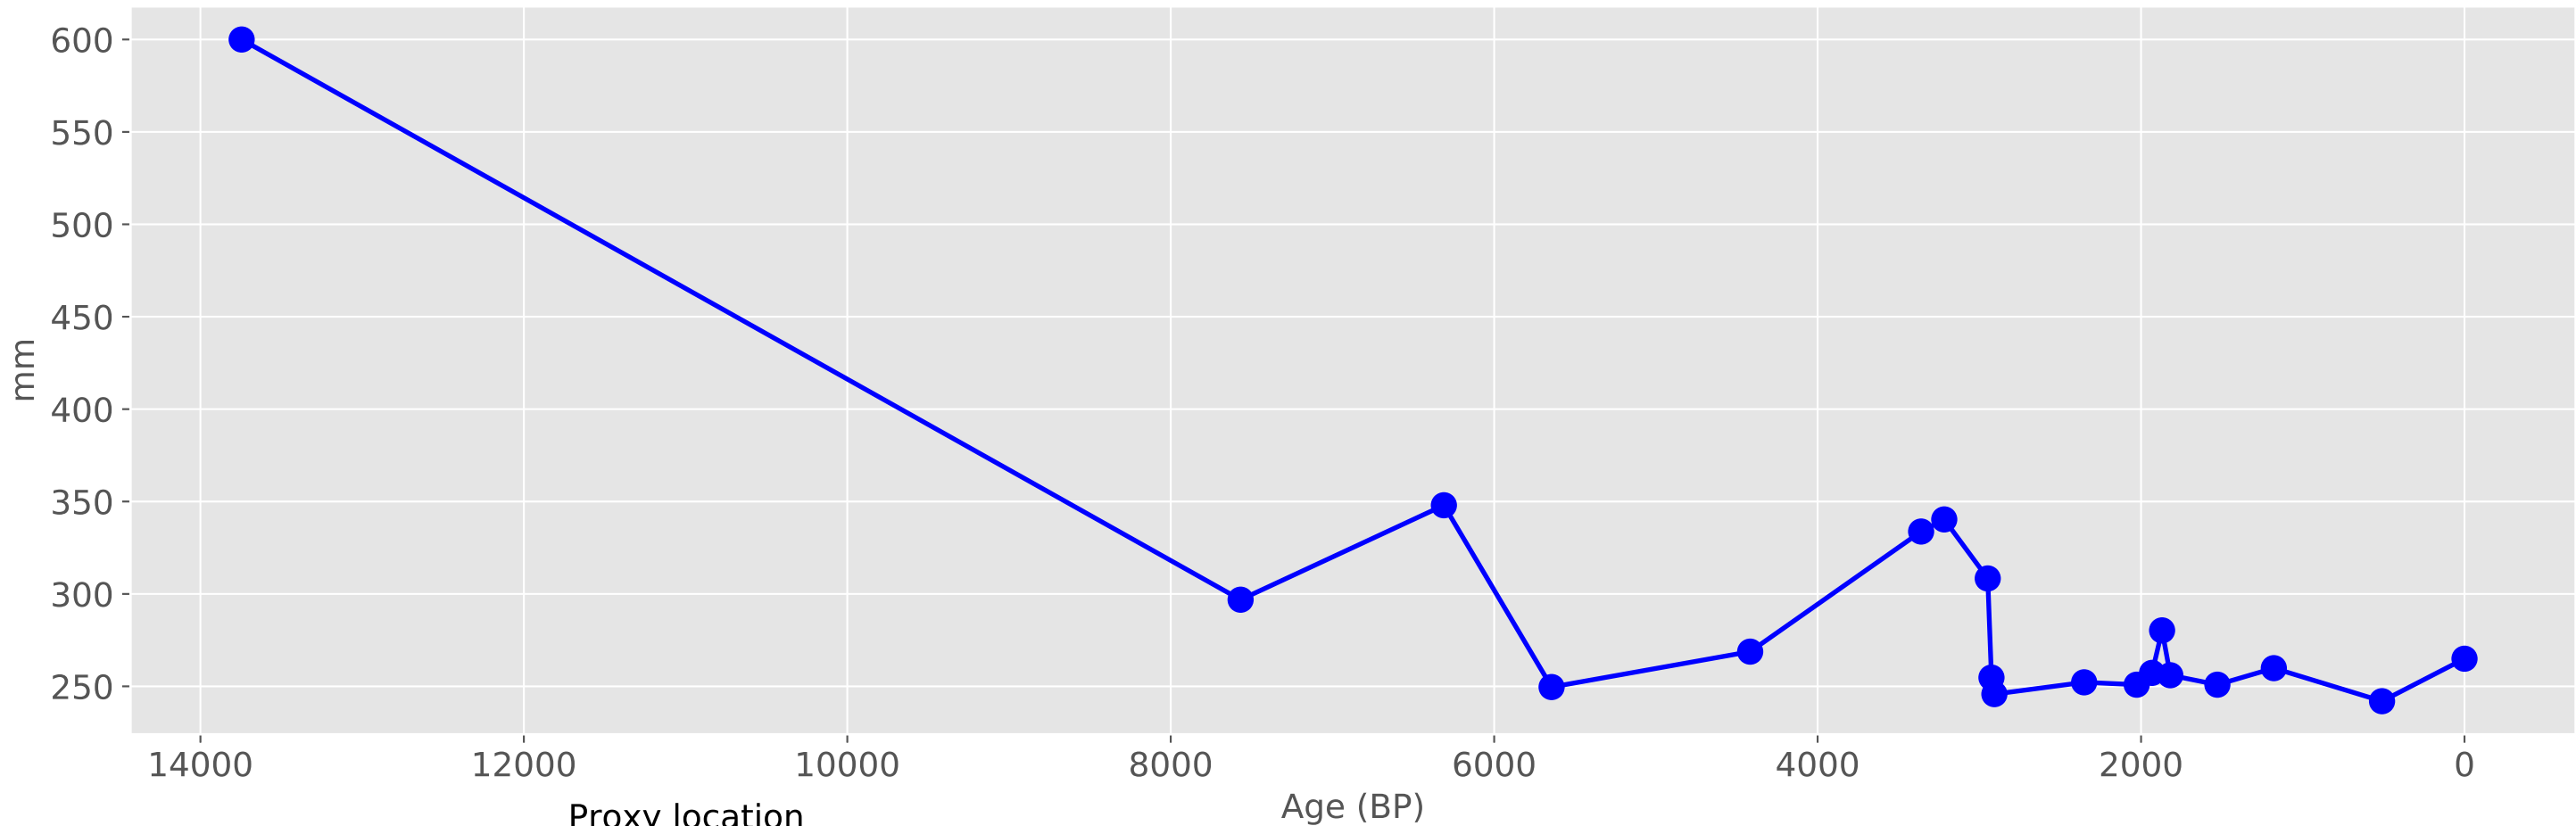

Proxy location  
(36.06 ° N, 108.08 ° W)

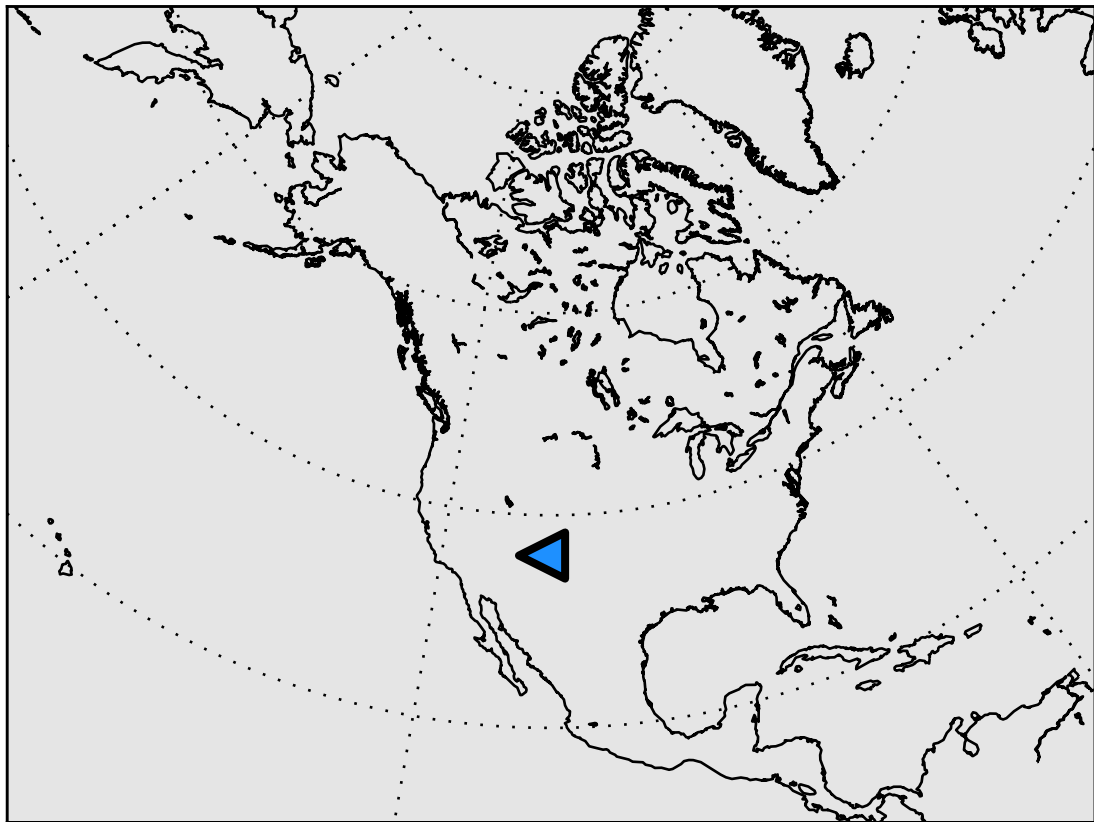

|                    |                                                       |
|--------------------|-------------------------------------------------------|
| Dataset name:      | MiddenCluster3.Harbert.2018                           |
| Archive type:      | Midden                                                |
| Proxy type:        | macrofossils                                          |
| Variable name:     | precipitation                                         |
| Latitude ( ° N):   | 36.0589                                               |
| Longitude ( ° E):  | -108.0819                                             |
| Elevation (m):     | 1848.0                                                |
| Interp. variable:  | P                                                     |
| Interp. detail:    | amount@surface                                        |
| Interp. season:    | annual                                                |
| Interp. direction: | positive                                              |
| Pub. 1 title:      | Quantitative Late Quaternary climate reconstructio... |
| Pub. 1 authors:    | Harbert, Robert S.; Nixon, Kevin C.                   |
| Pub. 1 year:       | 2018                                                  |
| Pub. 1 DOI:        | 10.5334/oq.46                                         |
| Original data URL: | geochange.er.usgs.gov/midden/                         |

Proxy data and metadata

Midden | macrofossils | MiddenCluster7.Harbert.2018 | WEB05a4e59f

Proxy time series: precipitation

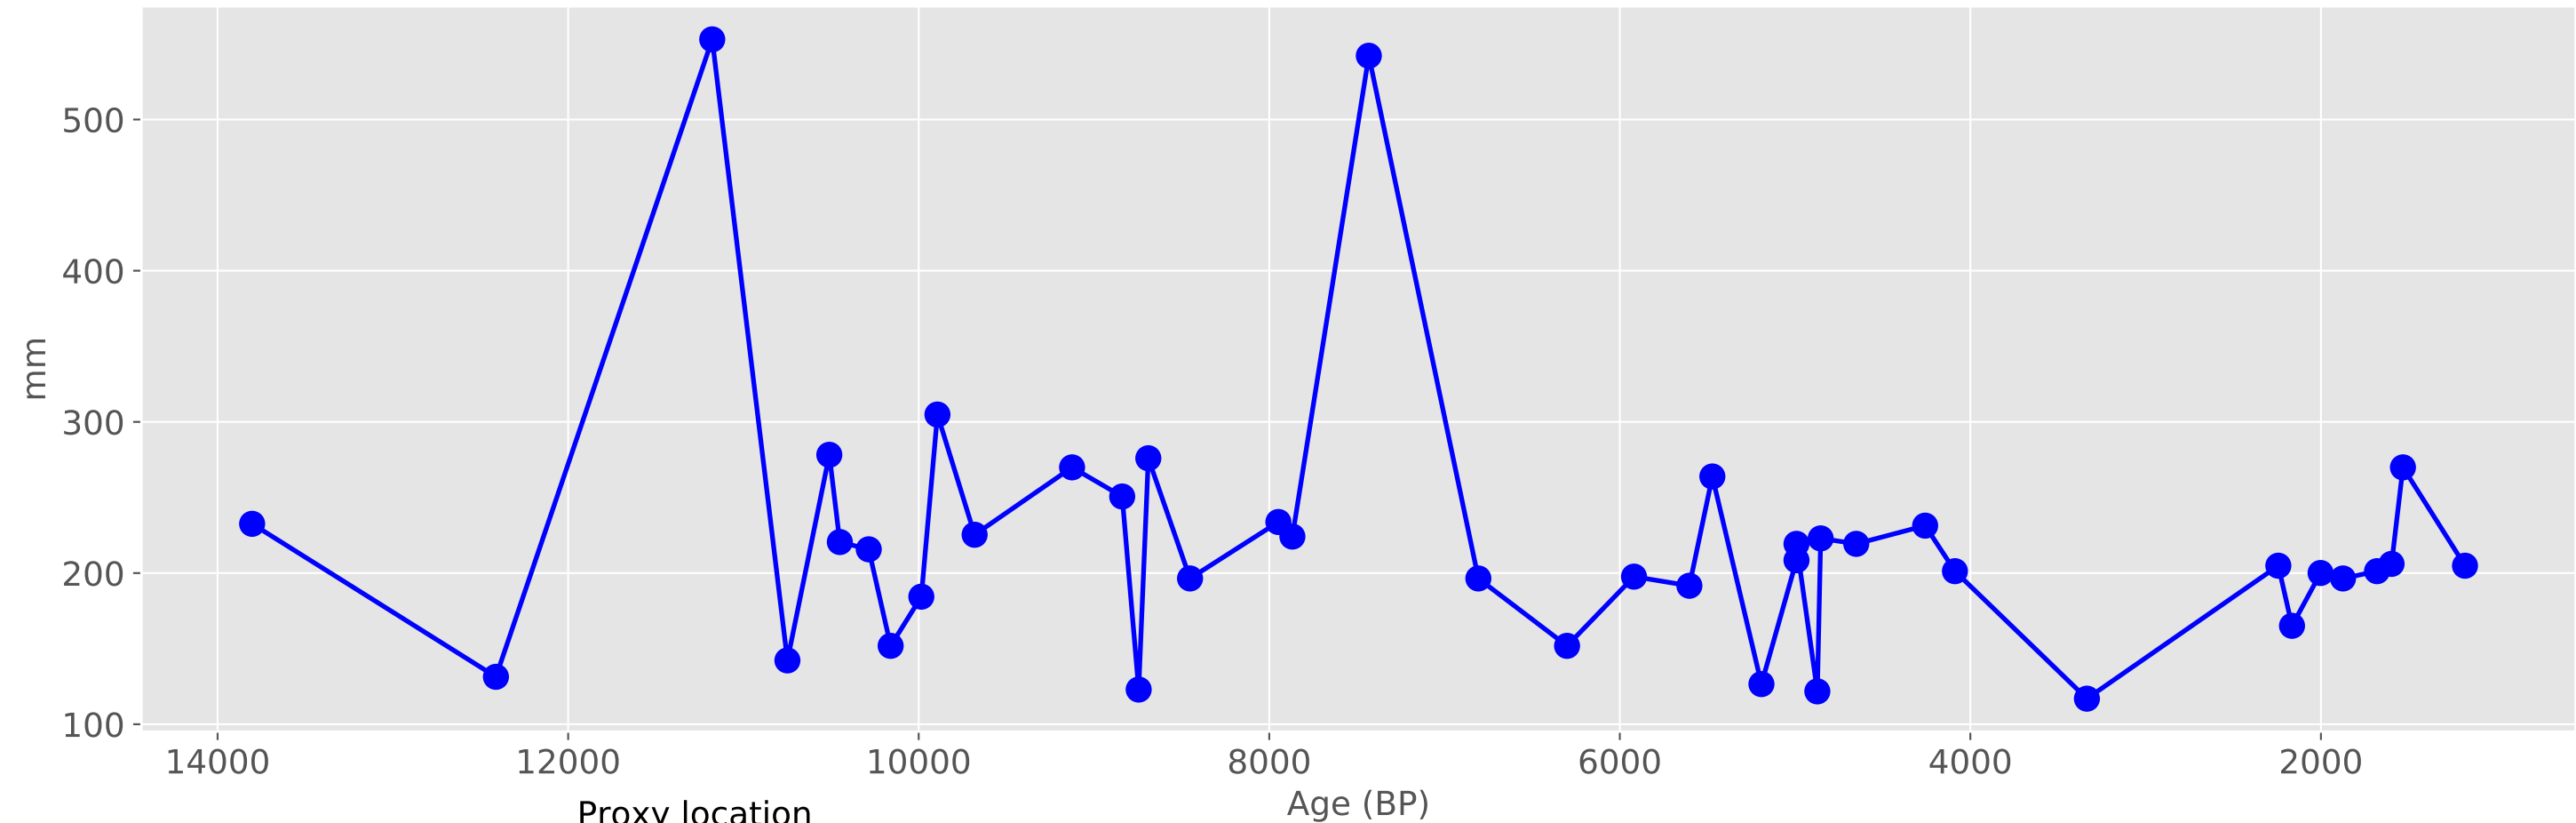

Proxy location  
(34.15 ° N, 116.00 ° W)

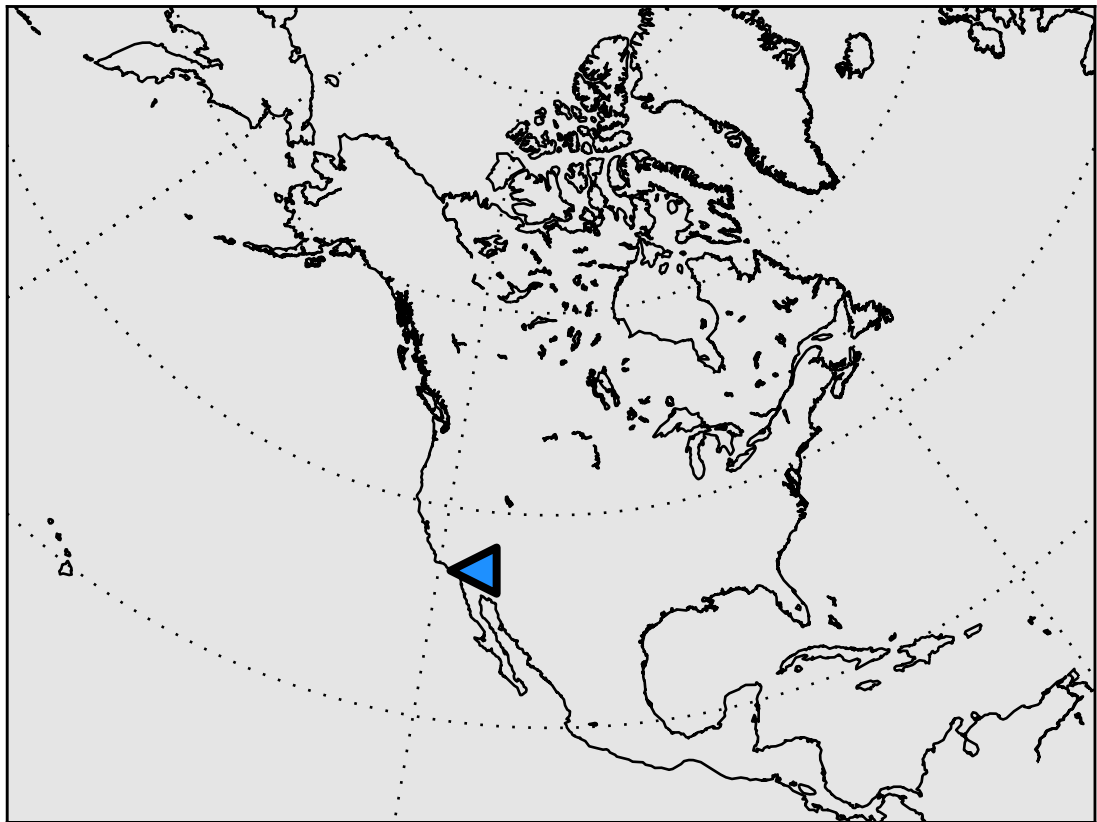

|                    |                                                       |
|--------------------|-------------------------------------------------------|
| Dataset name:      | MiddenCluster7.Harbert.2018                           |
| Archive type:      | Midden                                                |
| Proxy type:        | macrofossils                                          |
| Variable name:     | precipitation                                         |
| Latitude ( ° N):   | 34.1548                                               |
| Longitude ( ° E):  | -116.0048                                             |
| Elevation (m):     | 573.0                                                 |
| Interp. variable:  | P                                                     |
| Interp. detail:    | amount@surface                                        |
| Interp. season:    | annual                                                |
| Interp. direction: | positive                                              |
| Pub. 1 title:      | Quantitative Late Quaternary climate reconstructio... |
| Pub. 1 authors:    | Harbert, Robert S.; Nixon, Kevin C.                   |
| Pub. 1 year:       | 2018                                                  |
| Pub. 1 DOI:        | 10.5334/oq.46                                         |
| Original data URL: | geochange.er.usgs.gov/midden/                         |

Proxy data and metadata  
Midden | macrofossils | MiddenCluster7.Harbert.2018 | WEBa31332027

Proxy time series: temperature

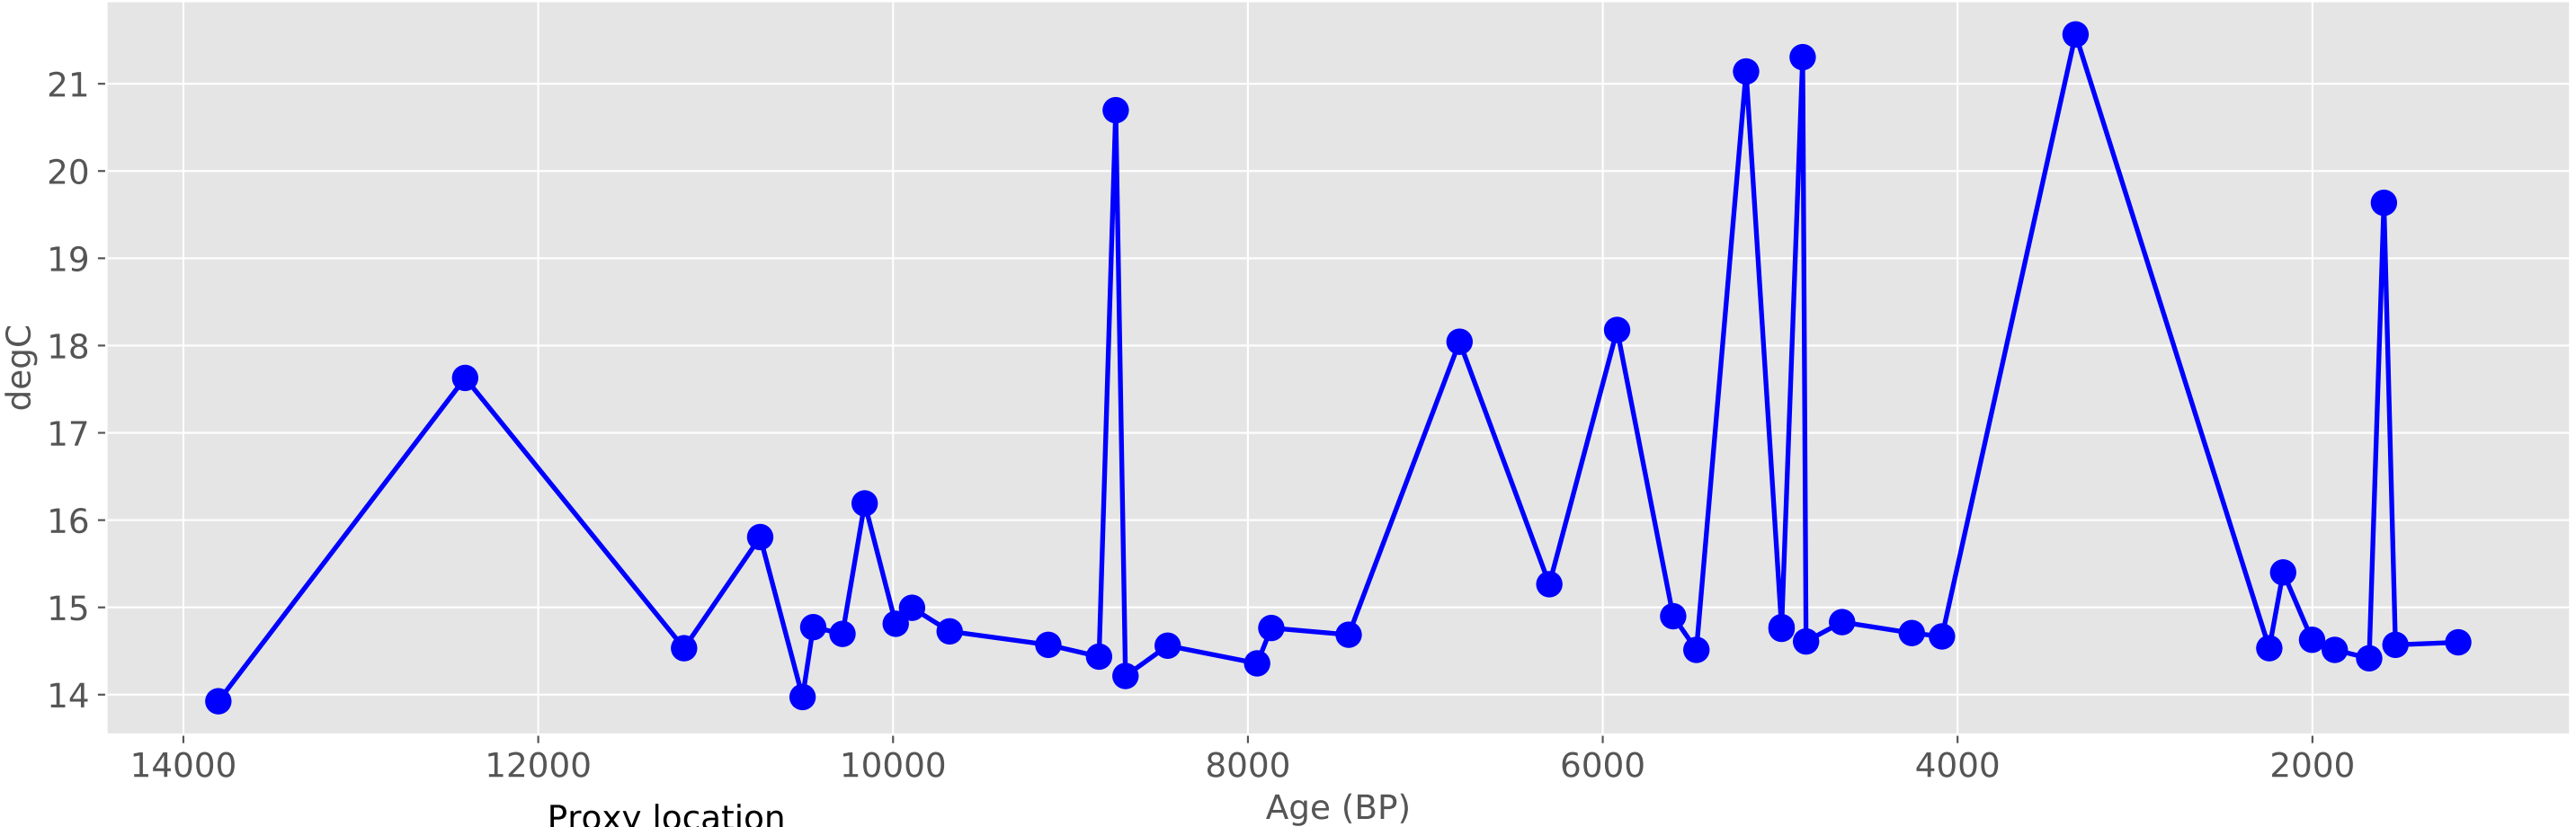

Proxy location  
(34.15 ° N, 116.00 ° W)



|                    |                                                       |
|--------------------|-------------------------------------------------------|
| Dataset name:      | MiddenCluster7.Harbert.2018                           |
| Archive type:      | Midden                                                |
| Proxy type:        | macrofossils                                          |
| Variable name:     | temperature                                           |
| Latitude ( ° N):   | 34.1548                                               |
| Longitude ( ° E):  | -116.0048                                             |
| Elevation (m):     | 573.0                                                 |
| Interp. variable:  | T                                                     |
| Interp. detail:    | air@surface                                           |
| Interp. season:    | annual                                                |
| Interp. direction: | positive                                              |
| Pub. 1 title:      | Quantitative Late Quaternary climate reconstructio... |
| Pub. 1 authors:    | Harbert, Robert S.; Nixon, Kevin C.                   |
| Pub. 1 year:       | 2018                                                  |
| Pub. 1 DOI:        | 10.5334/oq.46                                         |
| Original data URL: | geochange.er.usgs.gov/midden/                         |

Proxy data and metadata  
Midden | macrofossils | MiddenCluster7.Harbert.2018 | WEBc20aba9d

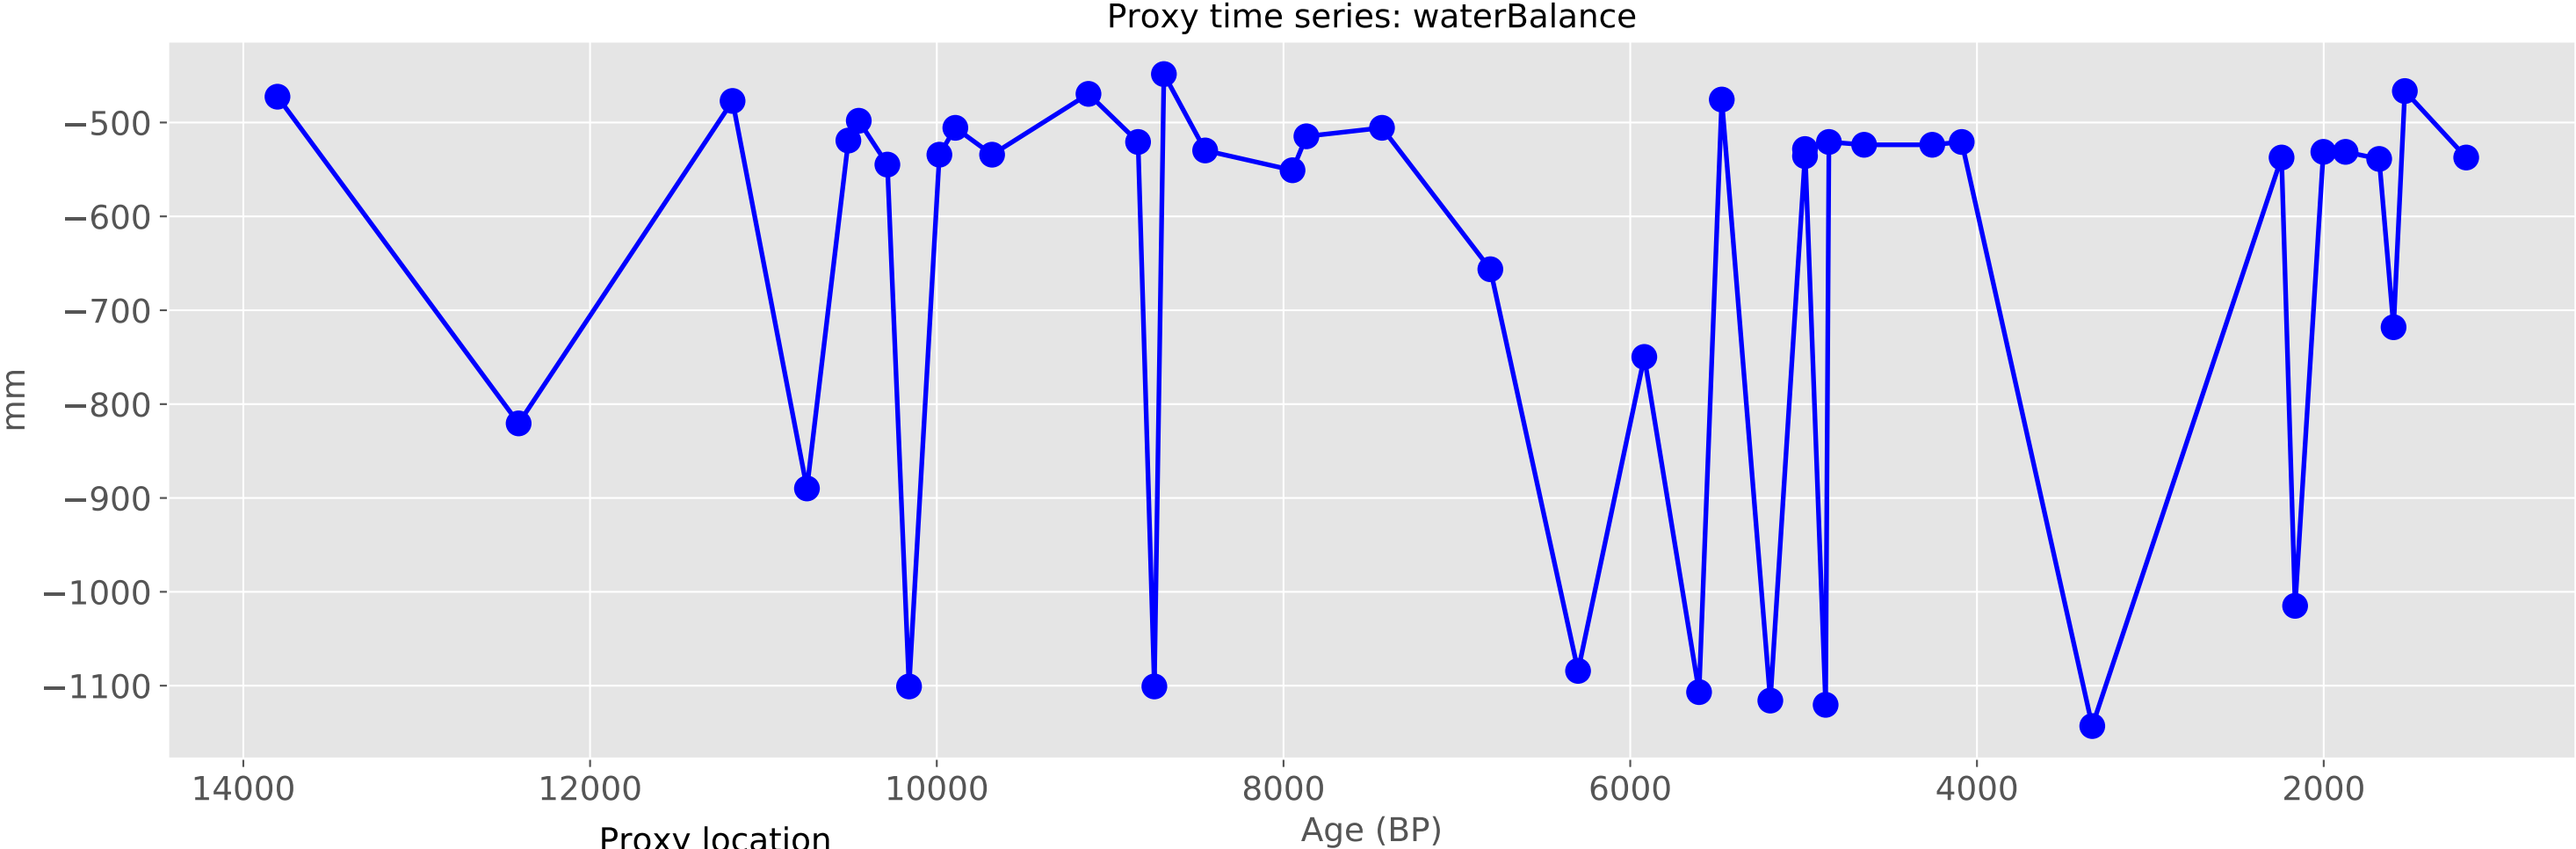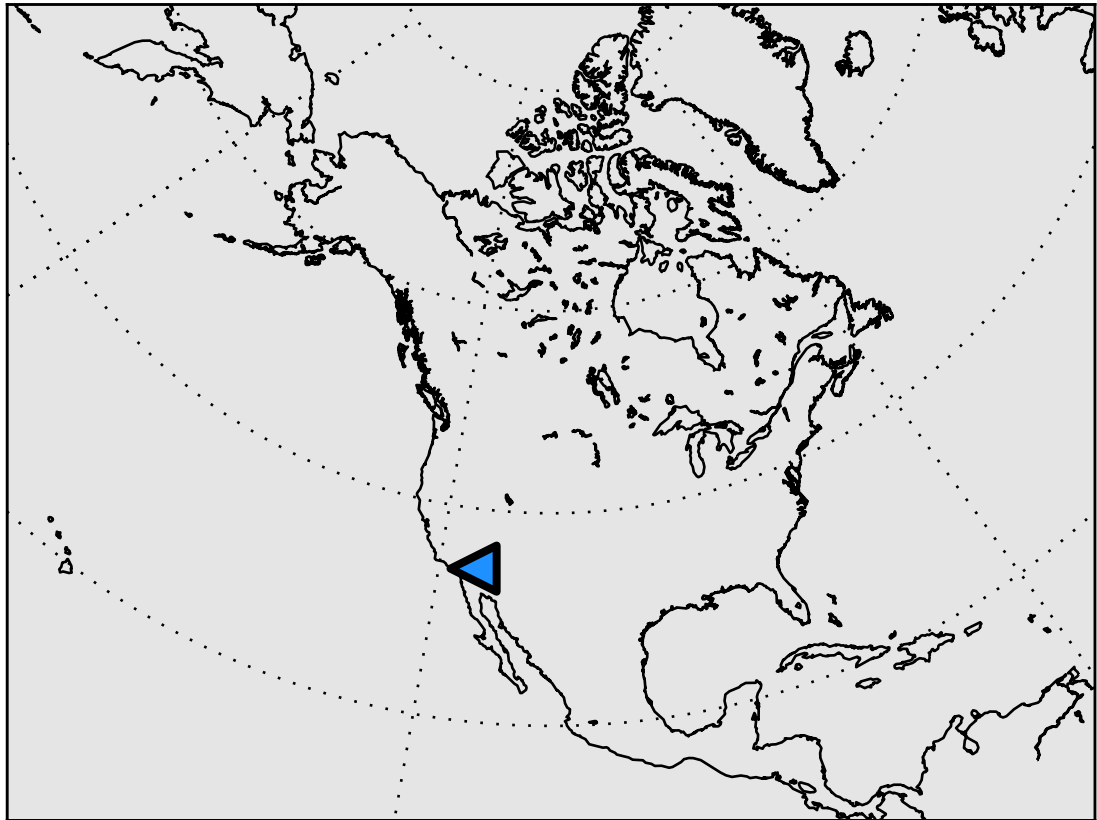

|                    |                                                       |
|--------------------|-------------------------------------------------------|
| Dataset name:      | MiddenCluster7.Harbert.2018                           |
| Archive type:      | Midden                                                |
| Proxy type:        | macrofossils                                          |
| Variable name:     | waterBalance                                          |
| Latitude ( ° N):   | 34.1548                                               |
| Longitude ( ° E):  | -116.0048                                             |
| Elevation (m):     | 573.0                                                 |
| Interp. variable:  | P-E                                                   |
| Interp. detail:    | @surface                                              |
| Interp. season:    | annual                                                |
| Interp. direction: | positive                                              |
| Pub. 1 title:      | Quantitative Late Quaternary climate reconstructio... |
| Pub. 1 authors:    | Harbert, Robert S.; Nixon, Kevin C.                   |
| Pub. 1 year:       | 2018                                                  |
| Pub. 1 DOI:        | 10.5334/oq.46                                         |
| Original data URL: | geochange.er.usgs.gov/midden/                         |

Proxy data and metadata

Midden | macrofossils | MiddenCluster5.Harbert.2018 | WEB773f70f5

Proxy time series: precipitation

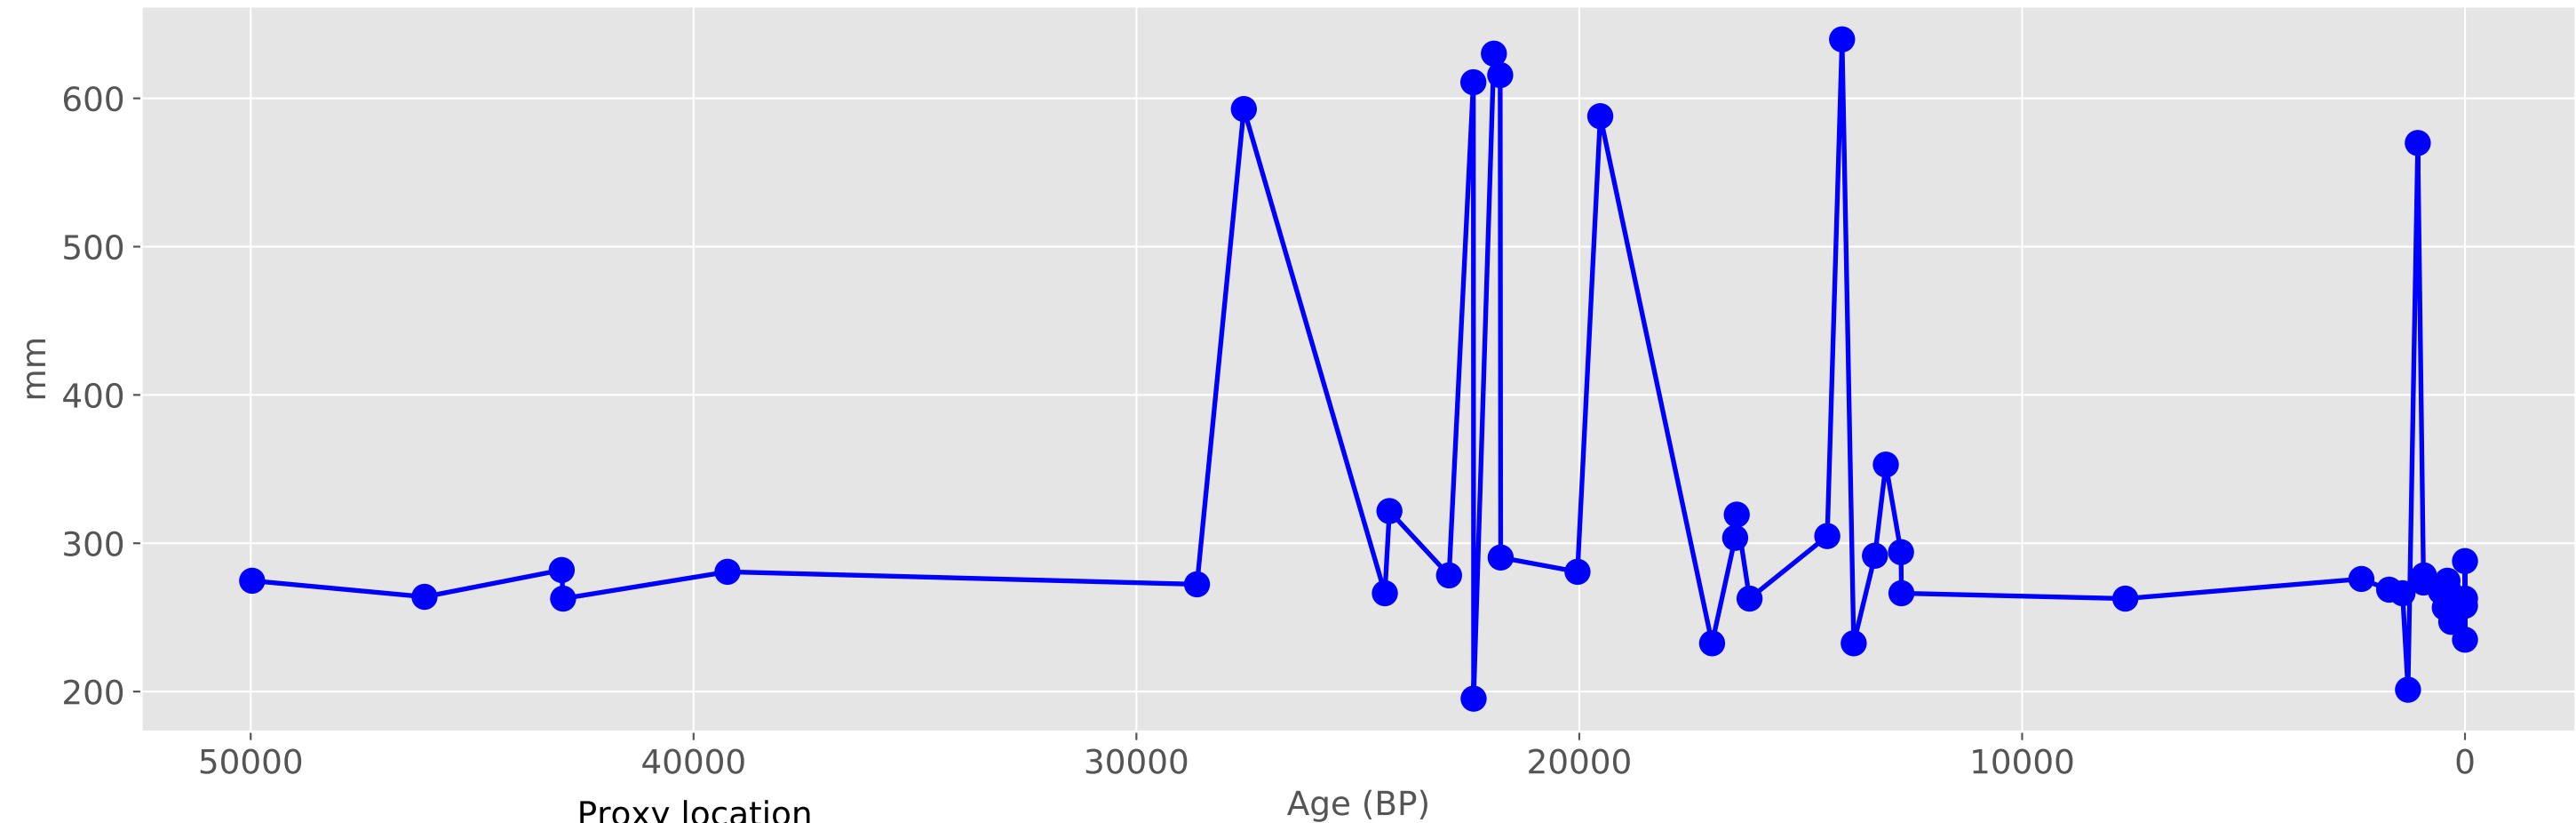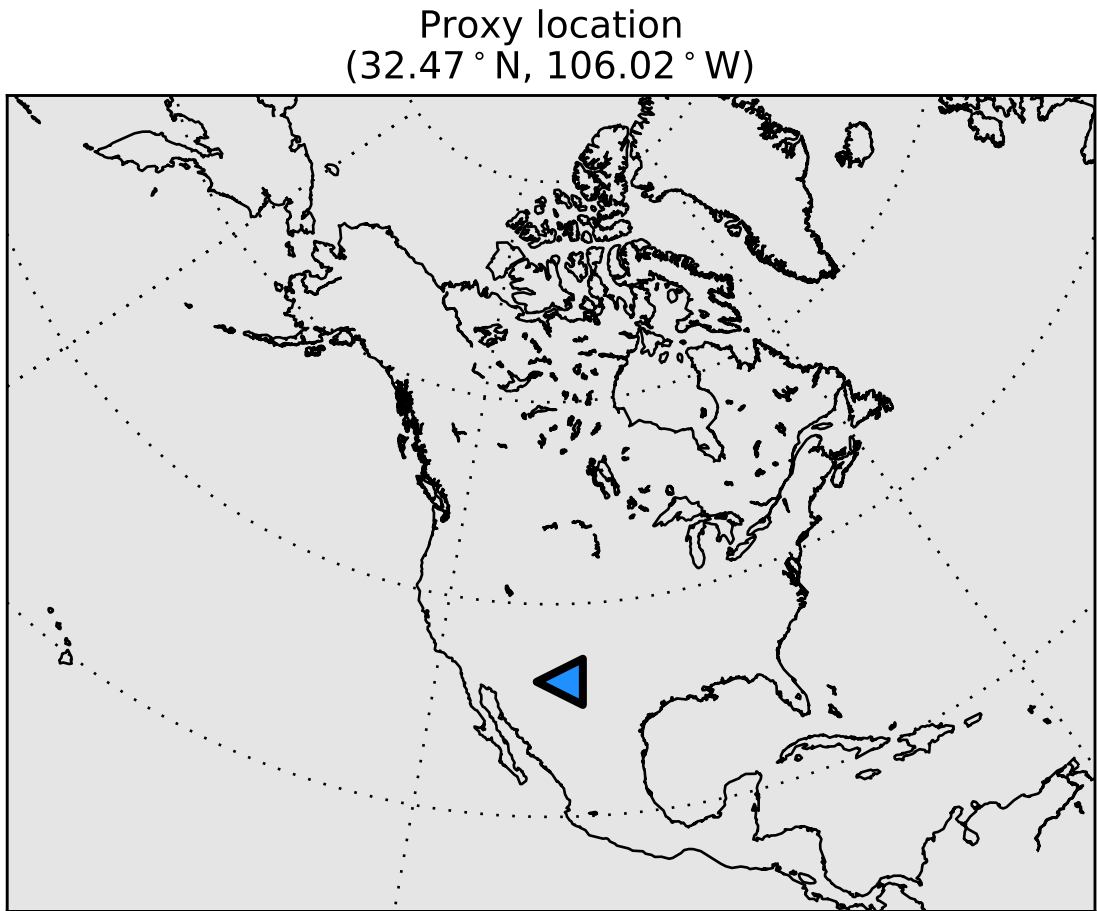

|                    |                                                       |
|--------------------|-------------------------------------------------------|
| Dataset name:      | MiddenCluster5.Harbert.2018                           |
| Archive type:      | Midden                                                |
| Proxy type:        | macrofossils                                          |
| Variable name:     | precipitation                                         |
| Latitude ( ° N):   | 32.4659                                               |
| Longitude ( ° E):  | -106.0203                                             |
| Elevation (m):     | 1760.0                                                |
| Interp. variable:  | P                                                     |
| Interp. detail:    | amount@surface                                        |
| Interp. season:    | annual                                                |
| Interp. direction: | positive                                              |
| Pub. 1 title:      | Quantitative Late Quaternary climate reconstructio... |
| Pub. 1 authors:    | Harbert, Robert S.; Nixon, Kevin C.                   |
| Pub. 1 year:       | 2018                                                  |
| Pub. 1 DOI:        | 10.5334/oq.46                                         |
| Original data URL: | geochange.er.usgs.gov/midden/                         |

Proxy data and metadata  
Midden | macrofossils | MiddenCluster5.Harbert.2018 | WEBa31332025

Proxy time series: temperature

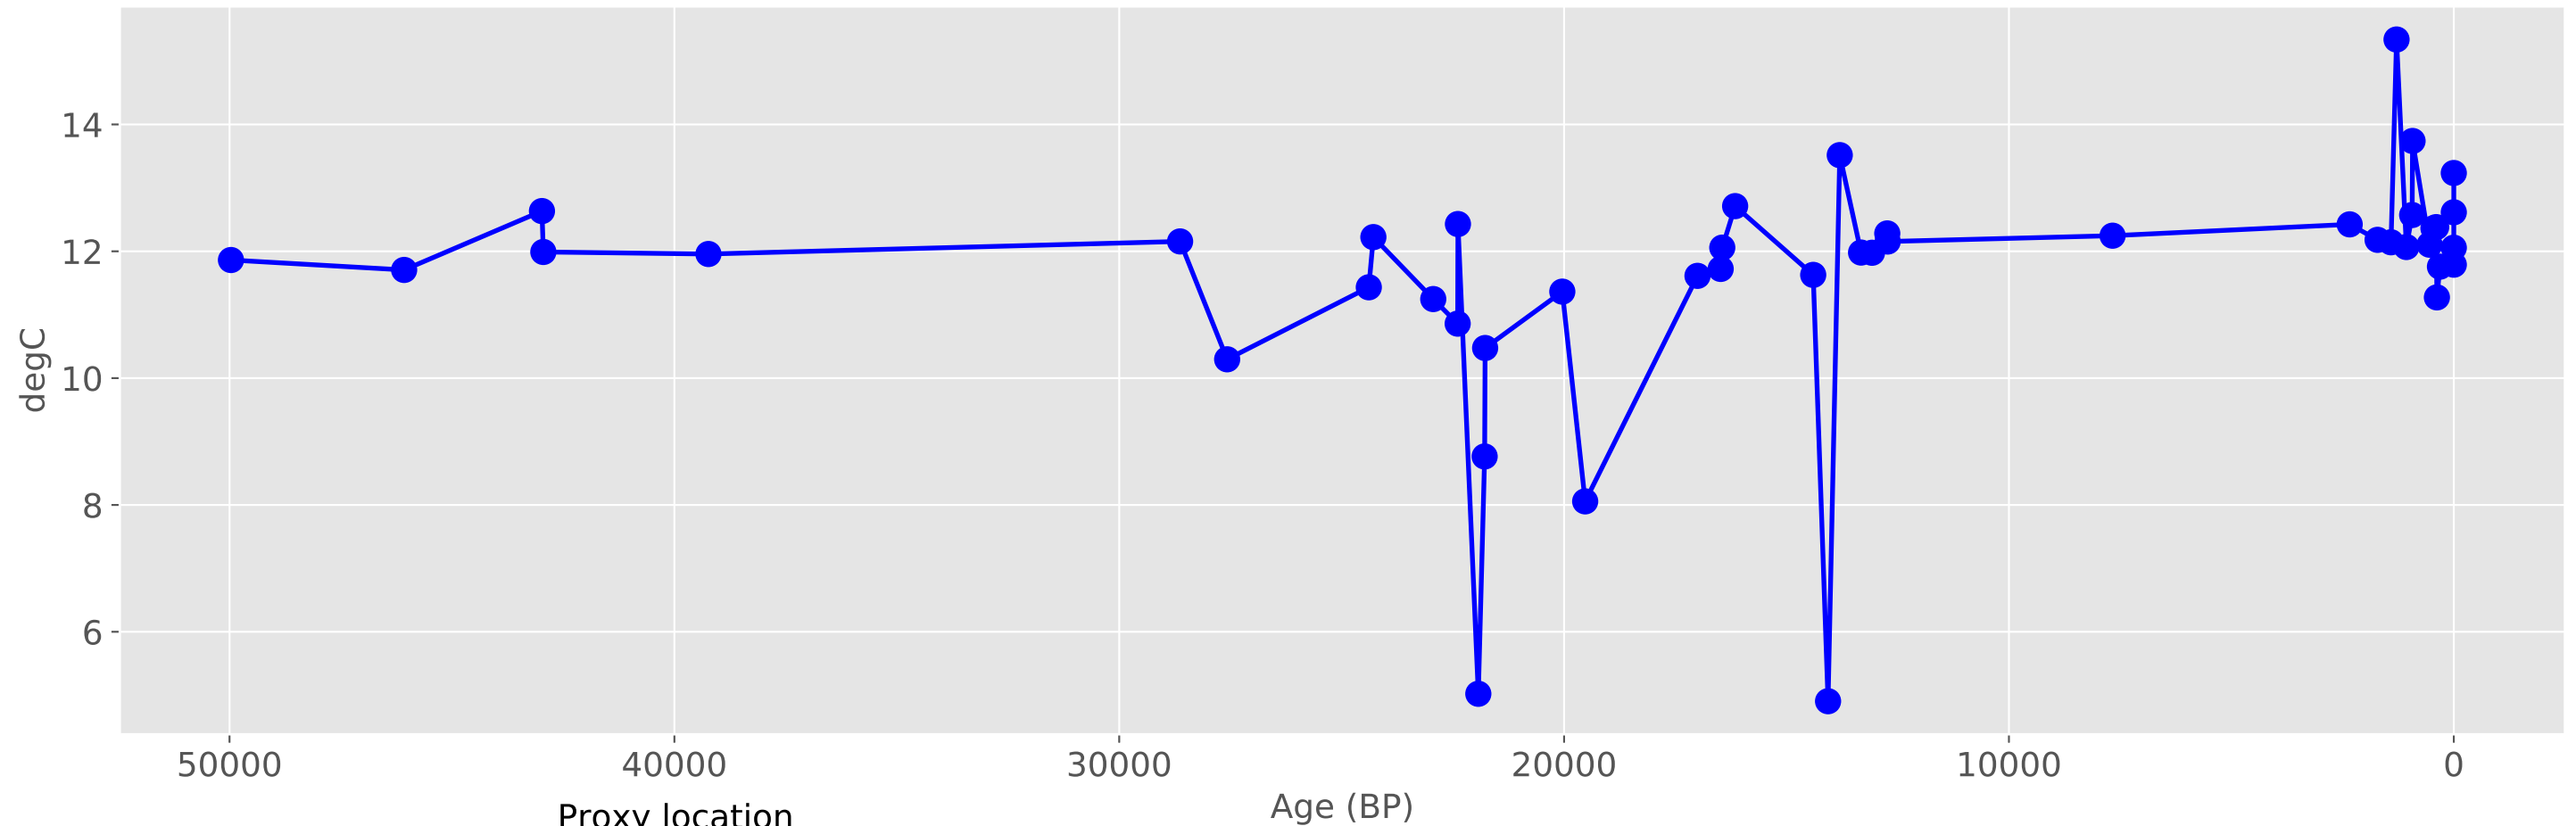

Proxy location  
(32.47 ° N, 106.02 ° W)

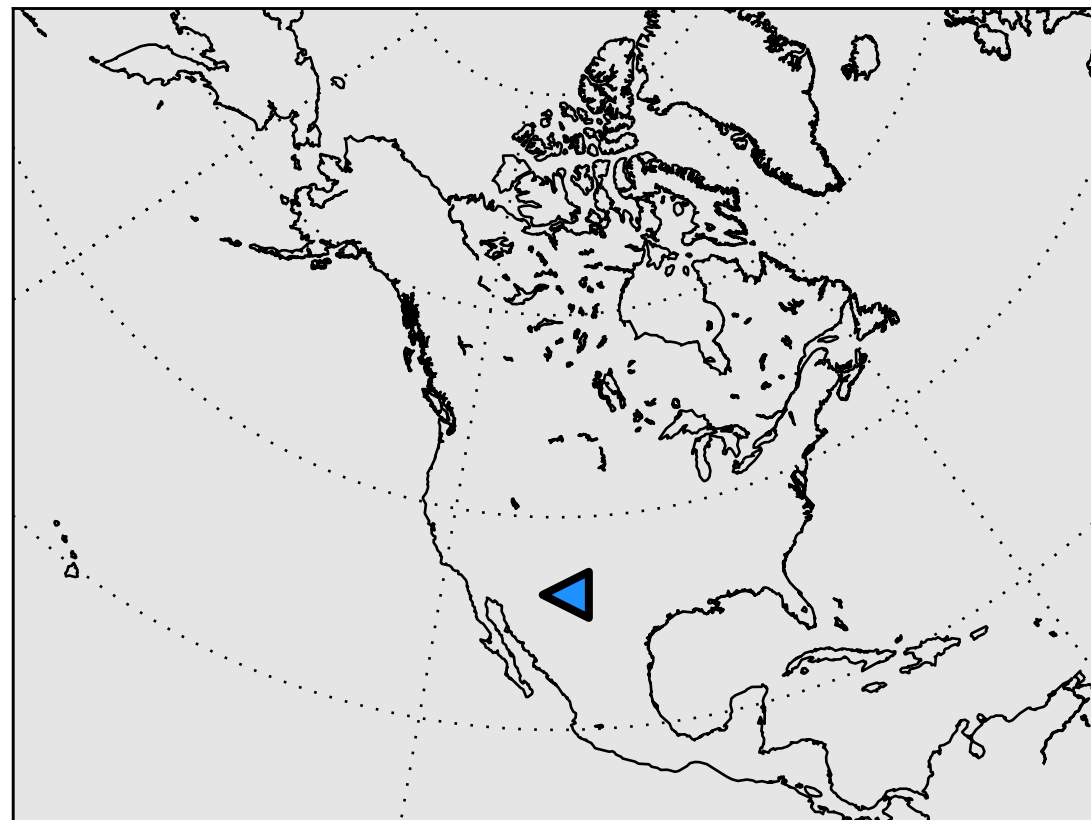

|                    |                                                       |
|--------------------|-------------------------------------------------------|
| Dataset name:      | MiddenCluster5.Harbert.2018                           |
| Archive type:      | Midden                                                |
| Proxy type:        | macrofossils                                          |
| Variable name:     | temperature                                           |
| Latitude ( ° N):   | 32.4659                                               |
| Longitude ( ° E):  | -106.0203                                             |
| Elevation (m):     | 1760.0                                                |
| Interp. variable:  | T                                                     |
| Interp. detail:    | air@surface                                           |
| Interp. season:    | annual                                                |
| Interp. direction: | positive                                              |
| Pub. 1 title:      | Quantitative Late Quaternary climate reconstructio... |
| Pub. 1 authors:    | Harbert, Robert S.; Nixon, Kevin C.                   |
| Pub. 1 year:       | 2018                                                  |
| Pub. 1 DOI:        | 10.5334/oq.46                                         |
| Original data URL: | geochange.er.usgs.gov/midden/                         |



Proxy data and metadata  
Midden | macrofossils | MiddenCluster6.Harbert.2018 | WEBa31332026

Proxy time series: temperature

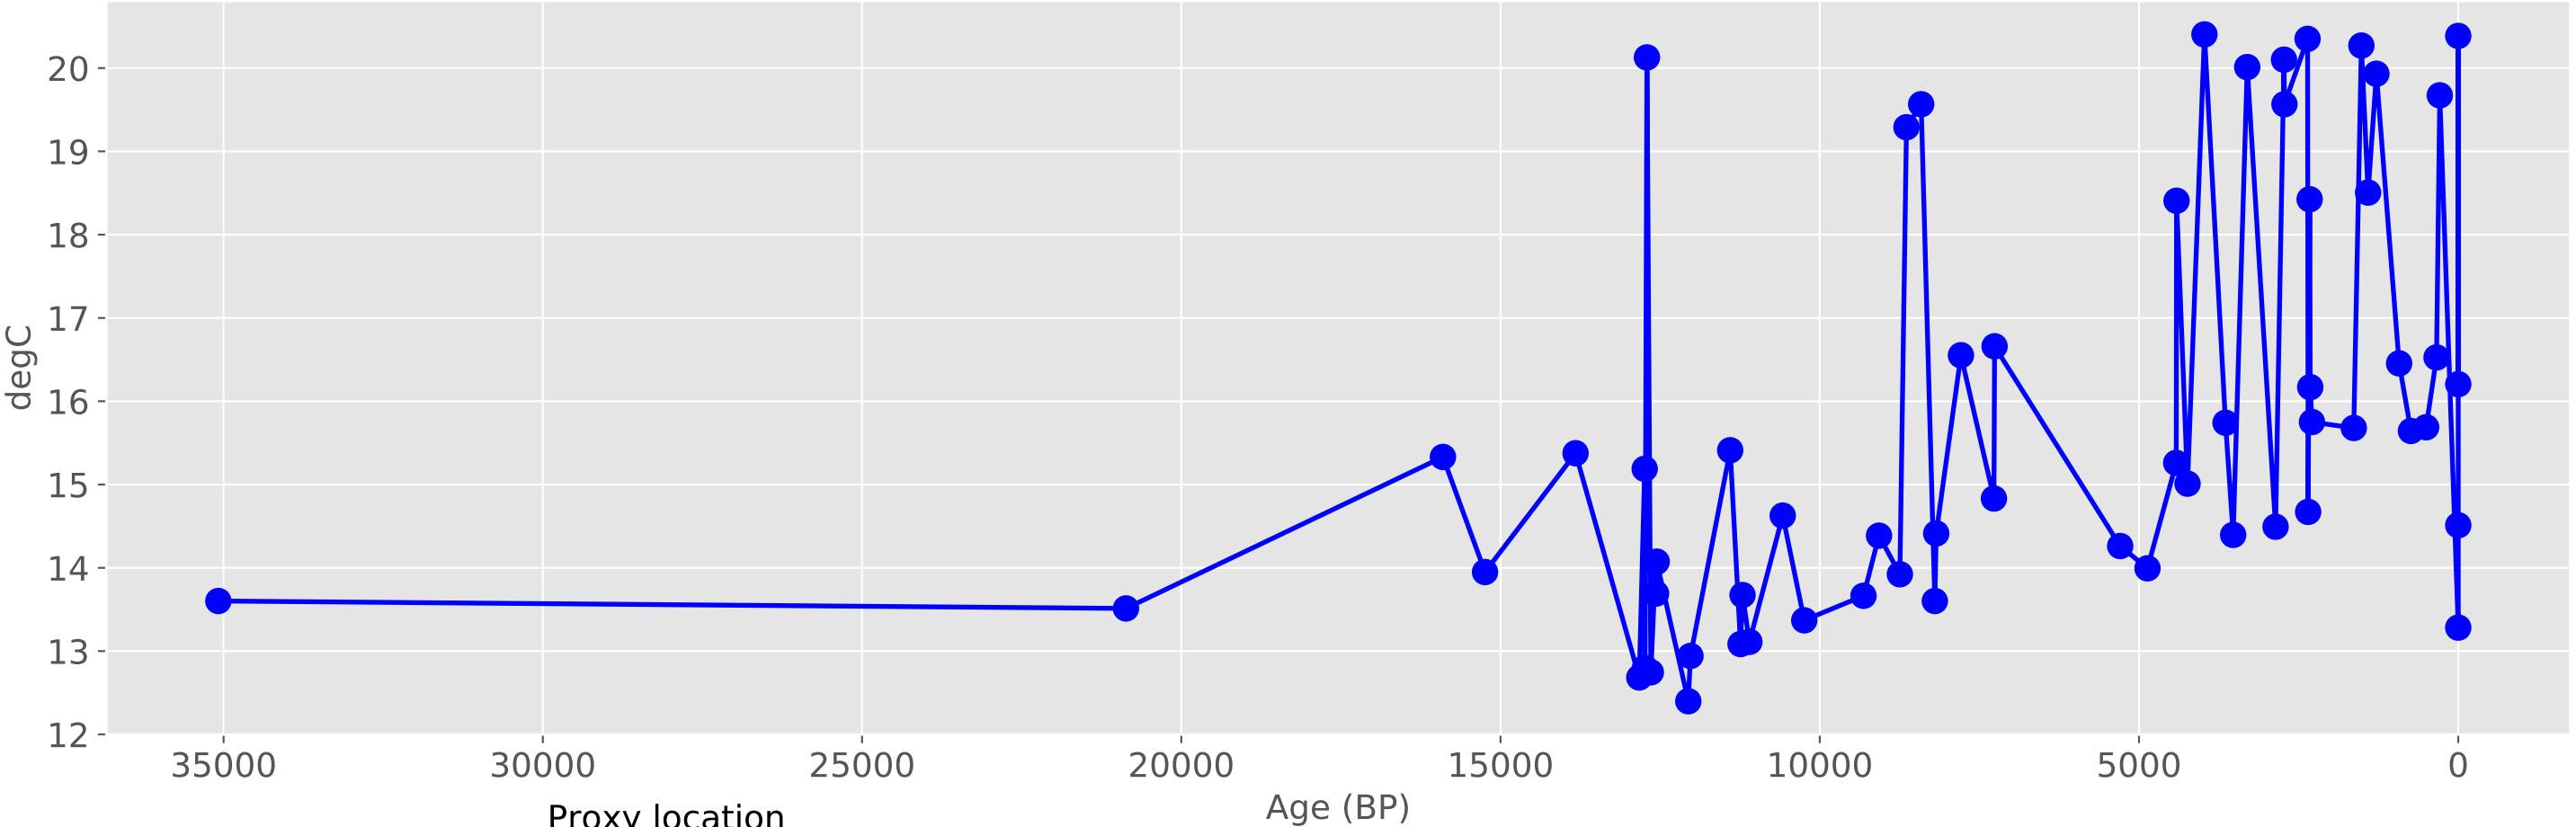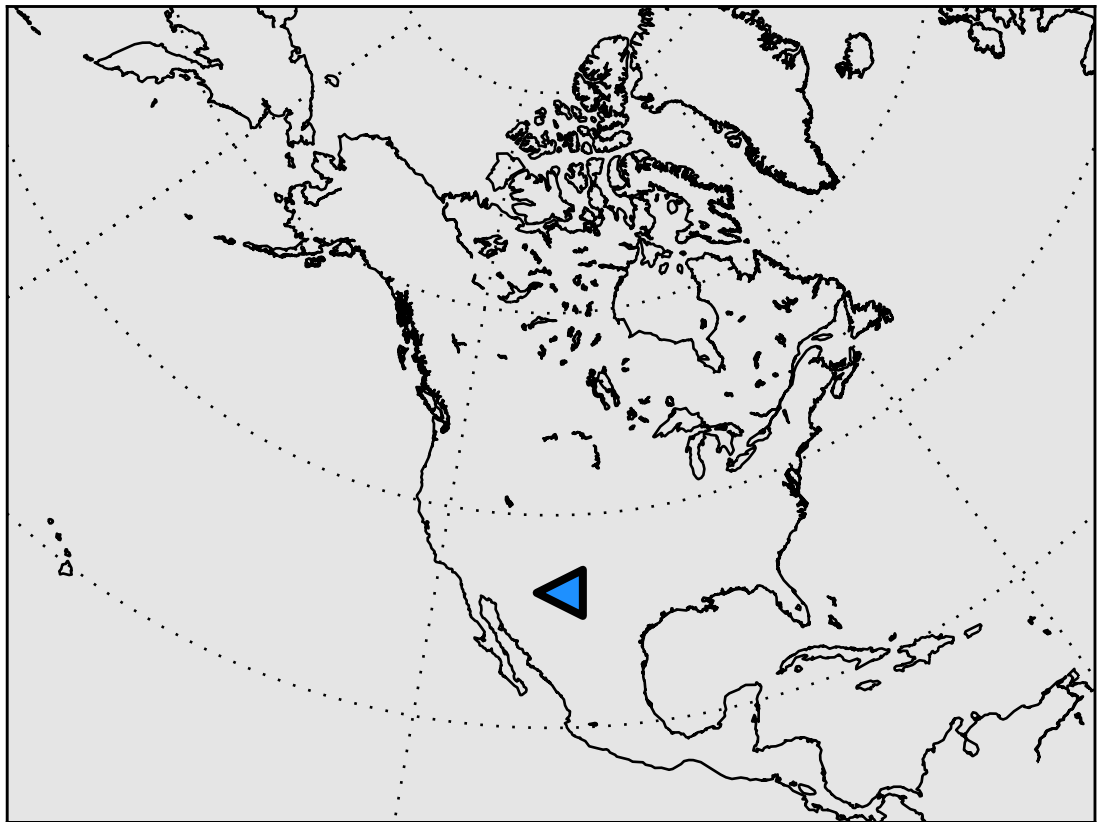

|                    |                                                       |
|--------------------|-------------------------------------------------------|
| Dataset name:      | MiddenCluster6.Harbert.2018                           |
| Archive type:      | Midden                                                |
| Proxy type:        | macrofossils                                          |
| Variable name:     | temperature                                           |
| Latitude ( ° N):   | 32.4659                                               |
| Longitude ( ° E):  | -106.0203                                             |
| Elevation (m):     | 1237.0                                                |
| Interp. variable:  | T                                                     |
| Interp. detail:    | air@surface                                           |
| Interp. season:    | annual                                                |
| Interp. direction: | positive                                              |
| Pub. 1 title:      | Quantitative Late Quaternary climate reconstructio... |
| Pub. 1 authors:    | Harbert, Robert S.; Nixon, Kevin C.                   |
| Pub. 1 year:       | 2018                                                  |
| Pub. 1 DOI:        | 10.5334/oq.46                                         |
| Original data URL: | geochange.er.usgs.gov/midden/                         |

Proxy data and metadata

Midden | macrofossils | MiddenCluster6.Harbert.2018 | WEBc7c1ae1d

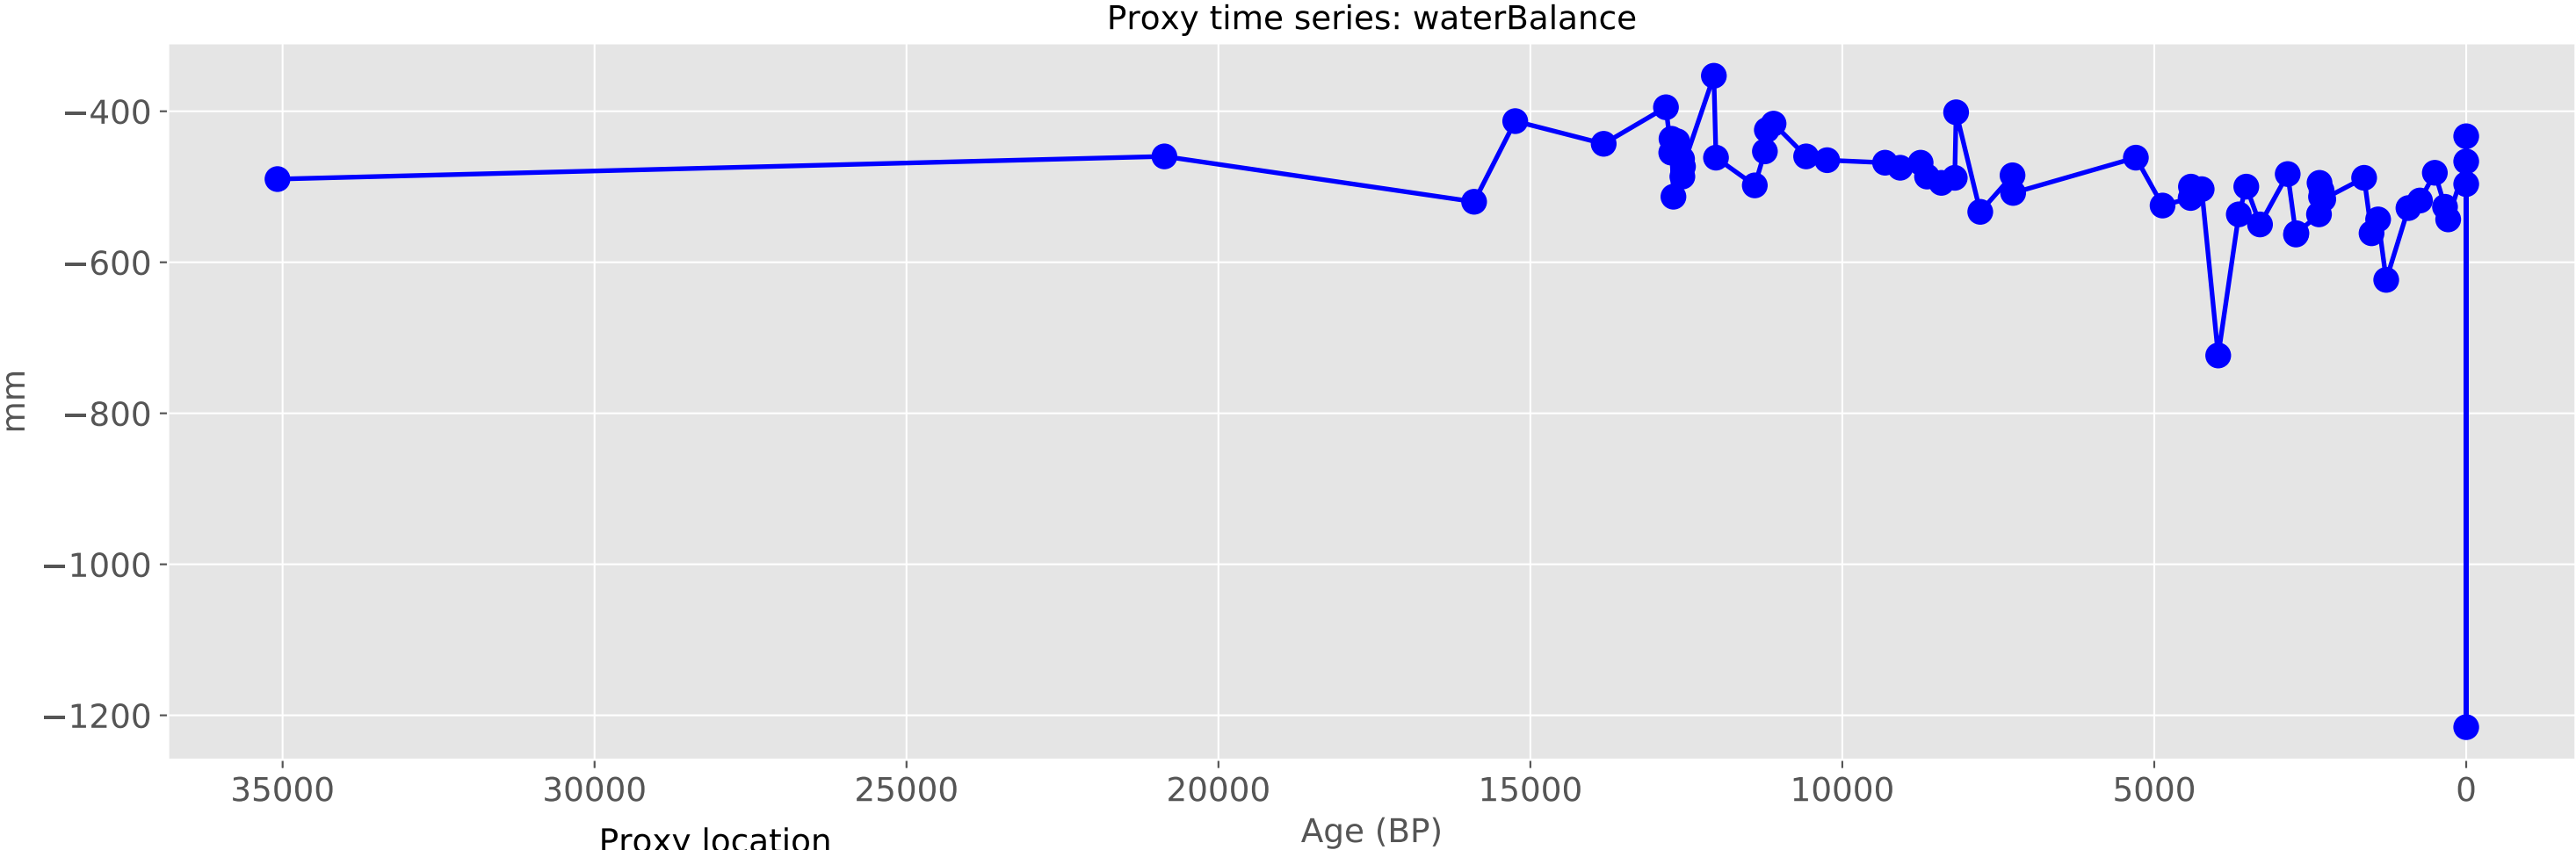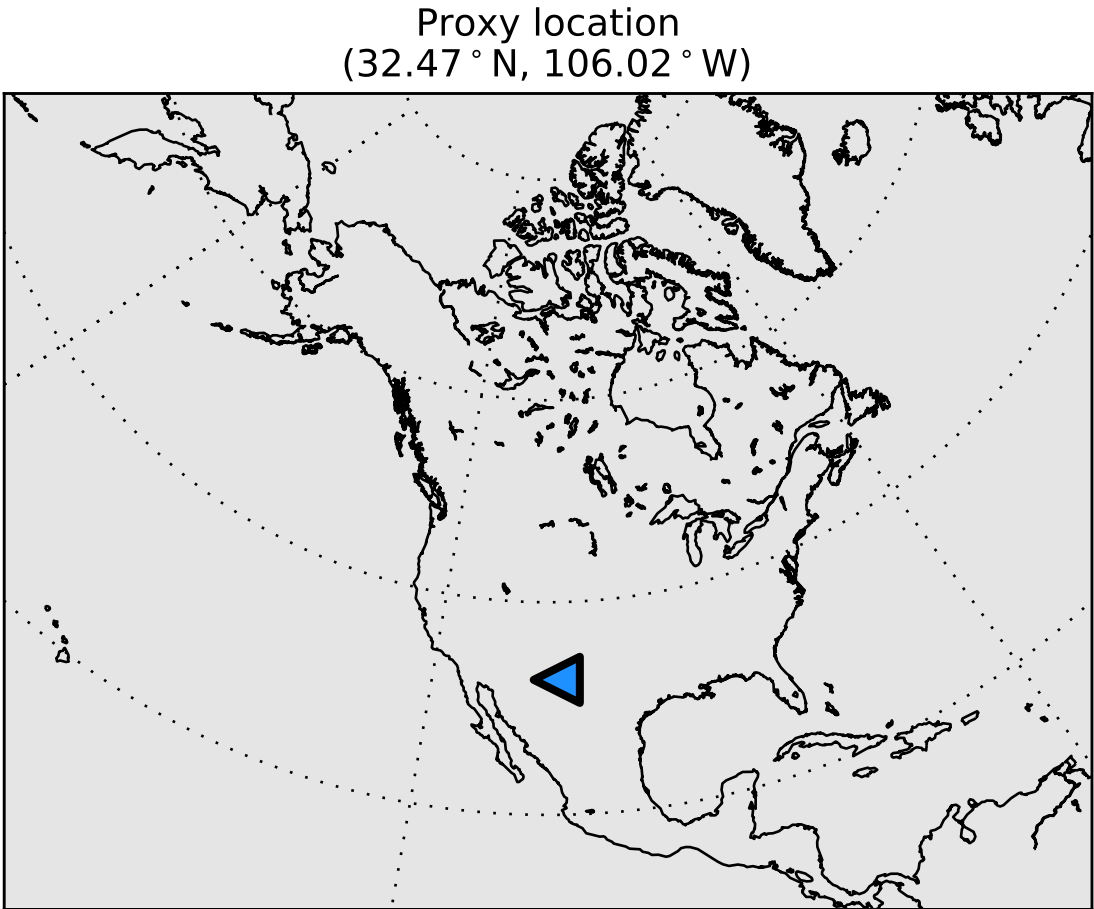

|                    |                                                       |
|--------------------|-------------------------------------------------------|
| Dataset name:      | MiddenCluster6.Harbert.2018                           |
| Archive type:      | Midden                                                |
| Proxy type:        | macrofossils                                          |
| Variable name:     | waterBalance                                          |
| Latitude ( ° N):   | 32.4659                                               |
| Longitude ( ° E):  | -106.0203                                             |
| Elevation (m):     | 1237.0                                                |
| Interp. variable:  | P-E                                                   |
| Interp. detail:    | @surface                                              |
| Interp. season:    | annual                                                |
| Interp. direction: | positive                                              |
| Pub. 1 title:      | Quantitative Late Quaternary climate reconstructio... |
| Pub. 1 authors:    | Harbert, Robert S.; Nixon, Kevin C.                   |
| Pub. 1 year:       | 2018                                                  |
| Pub. 1 DOI:        | 10.5334/oq.46                                         |
| Original data URL: | geochange.er.usgs.gov/midden/                         |

Proxy data and metadata  
Midden | macrofossils | MiddenCluster5.Harbert.2018 | WEBf0c97cde

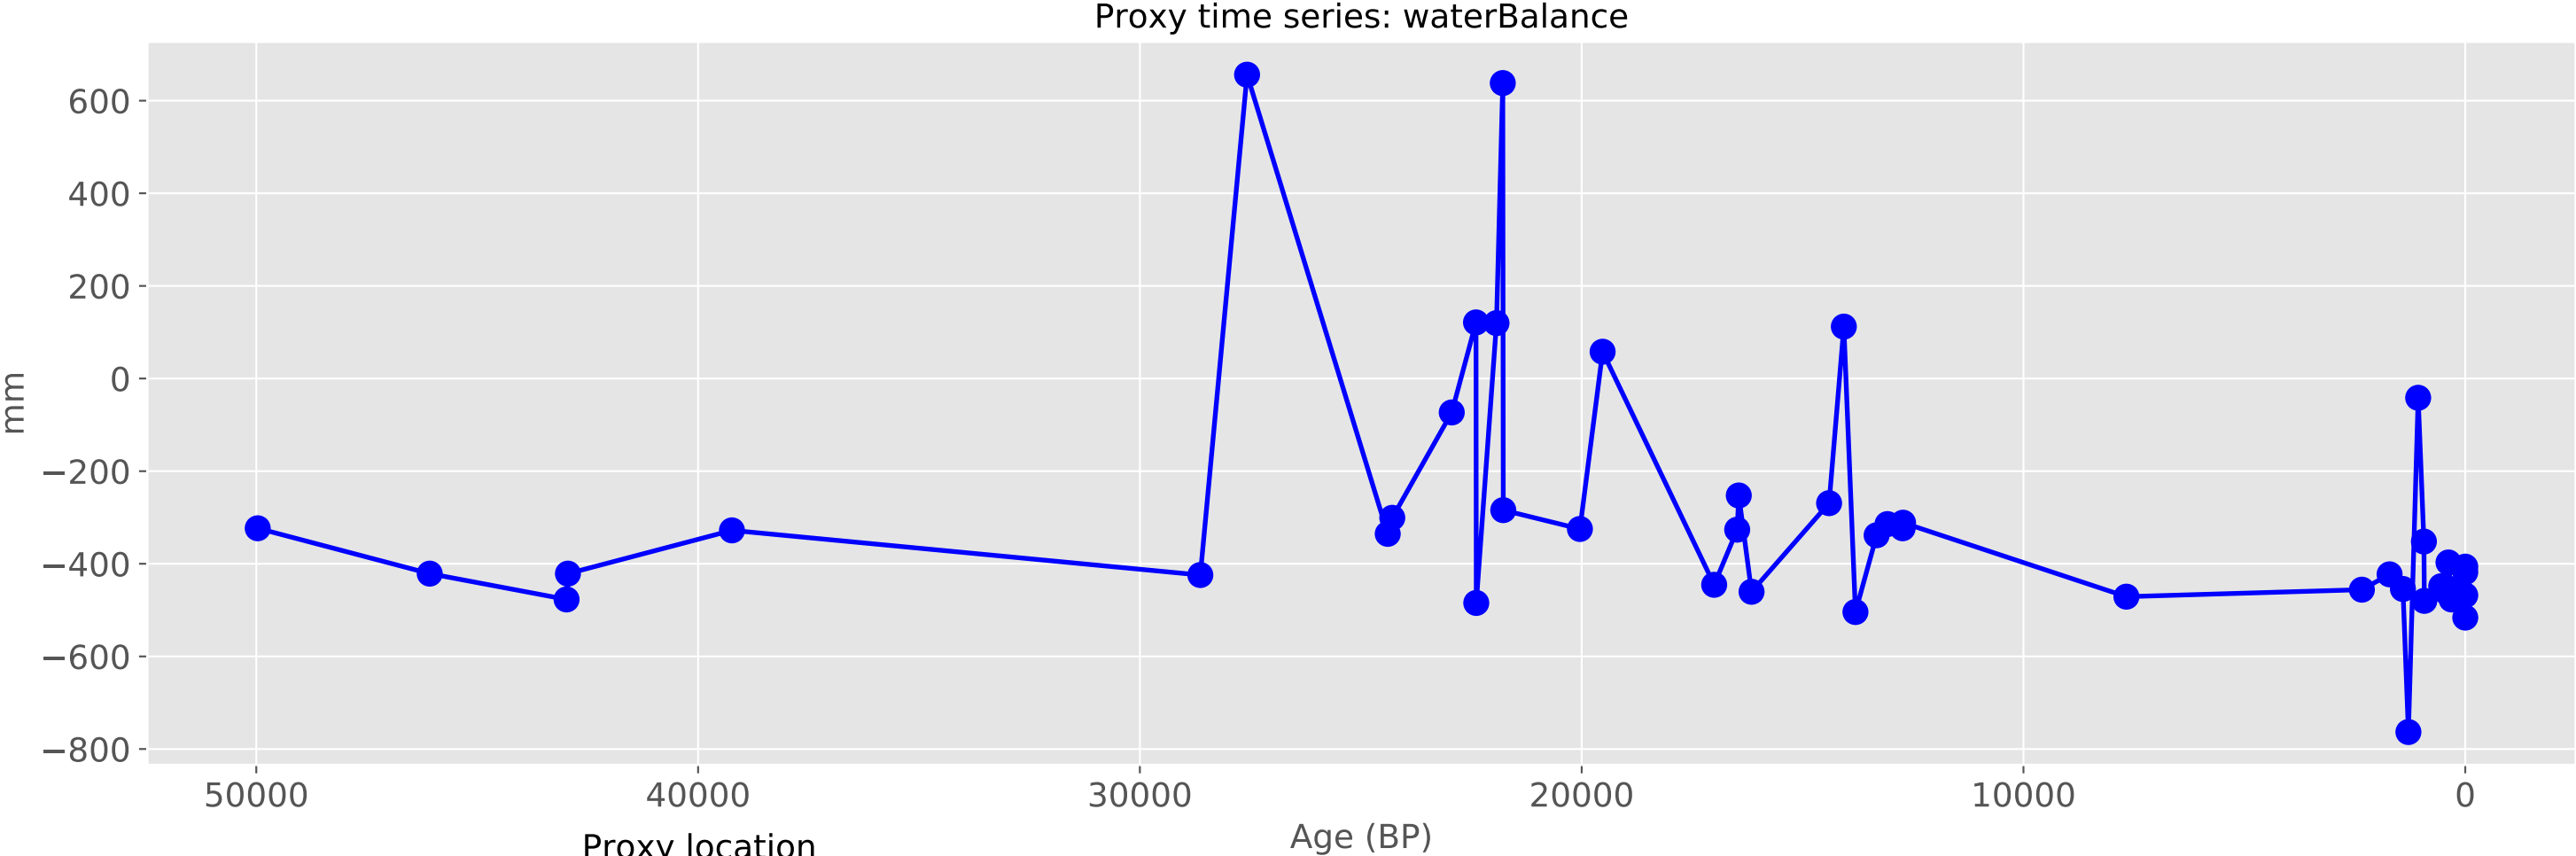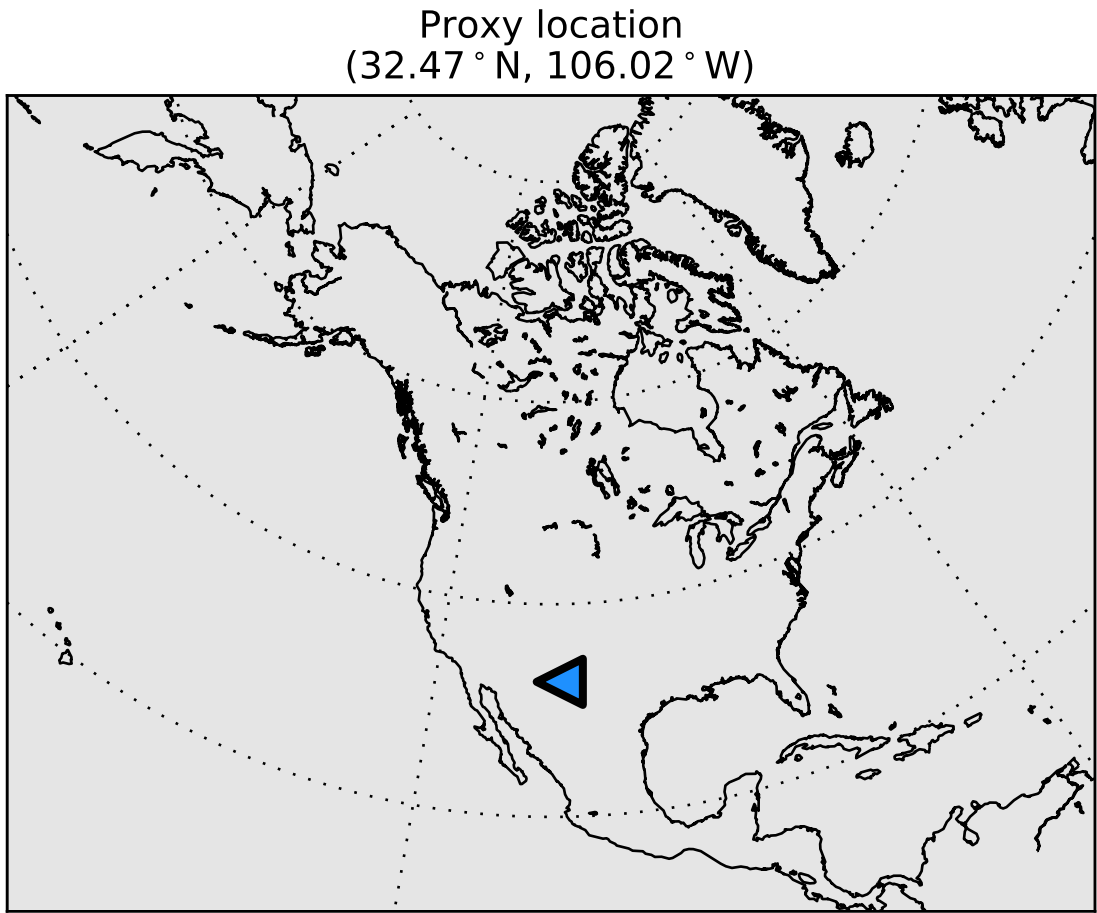

|                    |                                                       |
|--------------------|-------------------------------------------------------|
| Dataset name:      | MiddenCluster5.Harbert.2018                           |
| Archive type:      | Midden                                                |
| Proxy type:        | macrofossils                                          |
| Variable name:     | waterBalance                                          |
| Latitude ( ° N):   | 32.4659                                               |
| Longitude ( ° E):  | -106.0203                                             |
| Elevation (m):     | 1760.0                                                |
| Interp. variable:  | P-E                                                   |
| Interp. detail:    | @surface                                              |
| Interp. season:    | annual                                                |
| Interp. direction: | positive                                              |
| Pub. 1 title:      | Quantitative Late Quaternary climate reconstructio... |
| Pub. 1 authors:    | Harbert, Robert S.; Nixon, Kevin C.                   |
| Pub. 1 year:       | 2018                                                  |
| Pub. 1 DOI:        | 10.5334/oq.46                                         |
| Original data URL: | geochange.er.usgs.gov/midden/                         |

Proxy data and metadata  
Midden | macrofossils | MiddenCluster6.Harbert.2018 | WEBf3bcbd67

Proxy time series: precipitation

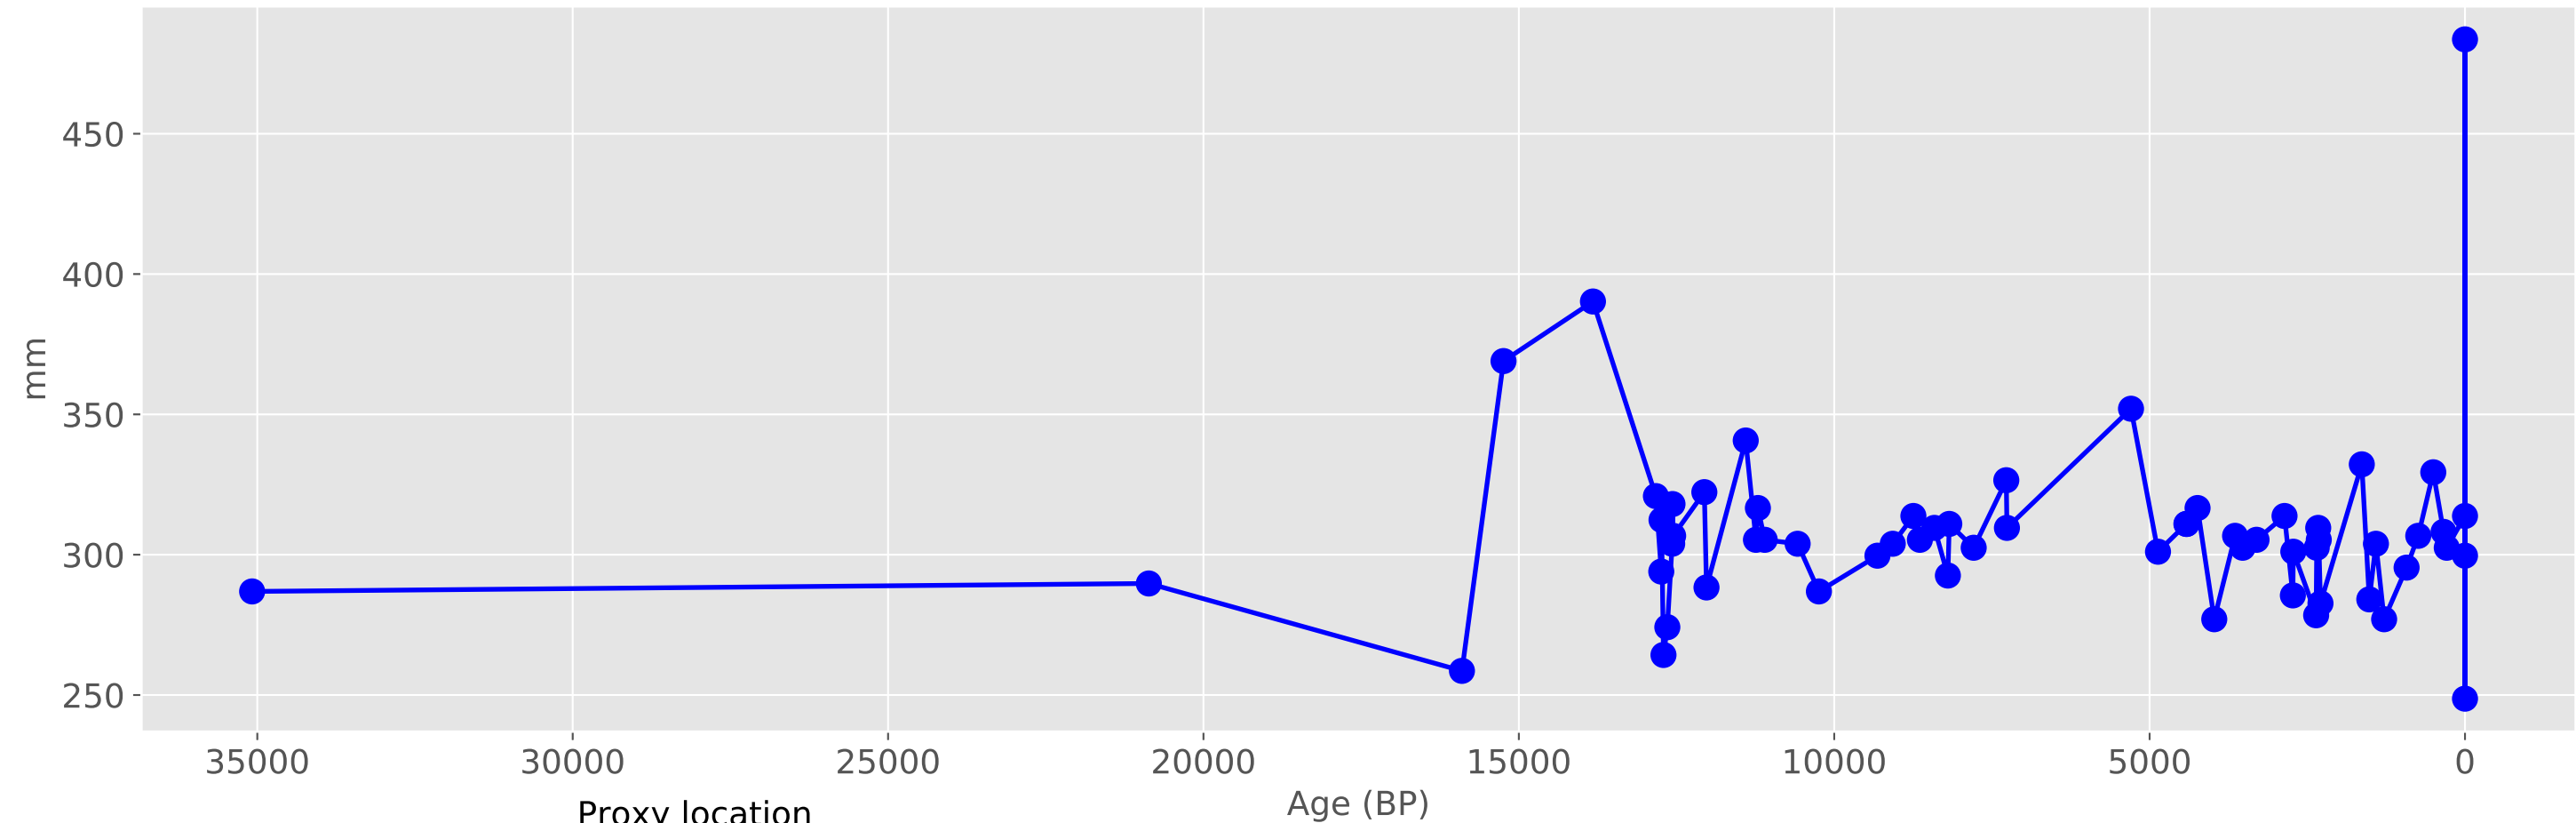

Proxy location  
(32.47 ° N, 106.02 ° W)



|                    |                                                       |
|--------------------|-------------------------------------------------------|
| Dataset name:      | MiddenCluster6.Harbert.2018                           |
| Archive type:      | Midden                                                |
| Proxy type:        | macrofossils                                          |
| Variable name:     | precipitation                                         |
| Latitude ( ° N):   | 32.4659                                               |
| Longitude ( ° E):  | -106.0203                                             |
| Elevation (m):     | 1237.0                                                |
| Interp. variable:  | P                                                     |
| Interp. detail:    | amount@surface                                        |
| Interp. season:    | annual                                                |
| Interp. direction: | positive                                              |
| Pub. 1 title:      | Quantitative Late Quaternary climate reconstructio... |
| Pub. 1 authors:    | Harbert, Robert S.; Nixon, Kevin C.                   |
| Pub. 1 year:       | 2018                                                  |
| Pub. 1 DOI:        | 10.5334/oq.46                                         |
| Original data URL: | geochange.er.usgs.gov/midden/                         |

Proxy data and metadata  
Midden | macrofossils | MiddenCluster8.Harbert.2018 | WEB8163f7a4

Proxy time series: precipitation

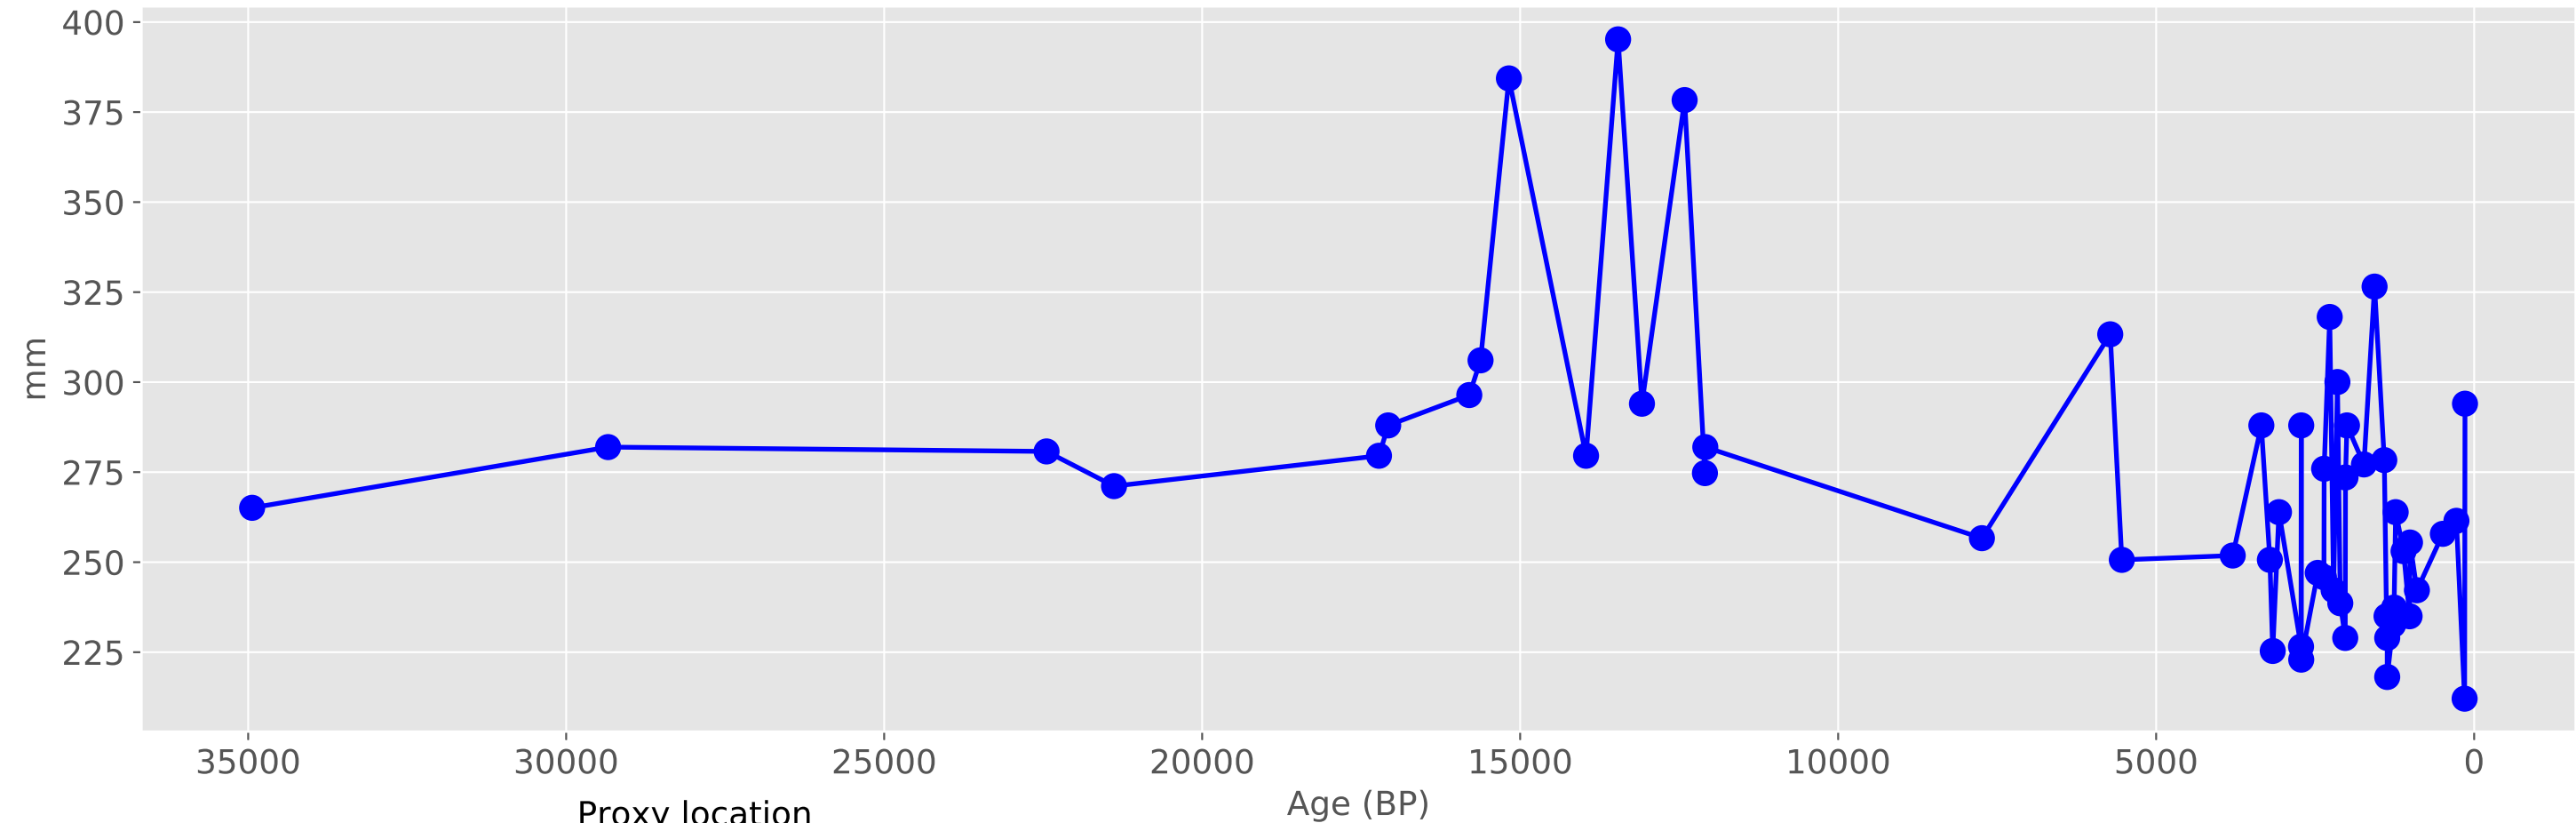

Proxy location  
(32.31 ° N, 109.10 ° W)

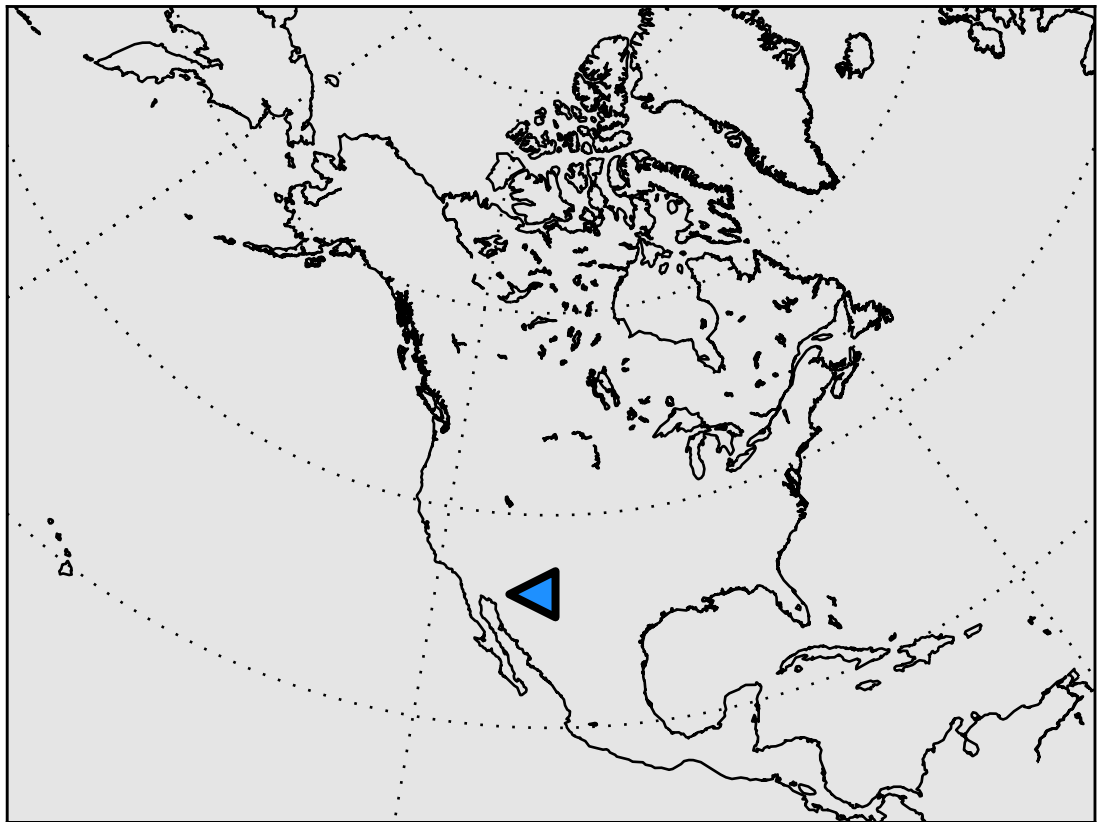

|                    |                                                       |
|--------------------|-------------------------------------------------------|
| Dataset name:      | MiddenCluster8.Harbert.2018                           |
| Archive type:      | Midden                                                |
| Proxy type:        | macrofossils                                          |
| Variable name:     | precipitation                                         |
| Latitude ( ° N):   | 32.3106                                               |
| Longitude ( ° E):  | -109.0977                                             |
| Elevation (m):     | 1339.0                                                |
| Interp. variable:  | P                                                     |
| Interp. detail:    | amount@surface                                        |
| Interp. season:    | annual                                                |
| Interp. direction: | positive                                              |
| Pub. 1 title:      | Quantitative Late Quaternary climate reconstructio... |
| Pub. 1 authors:    | Harbert, Robert S.; Nixon, Kevin C.                   |
| Pub. 1 year:       | 2018                                                  |
| Pub. 1 DOI:        | 10.5334/oq.46                                         |
| Original data URL: | geochange.er.usgs.gov/midden/                         |

Proxy data and metadata

Midden | macrofossils | MiddenCluster8.Harbert.2018 | WEBa31332028

Proxy time series: temperature

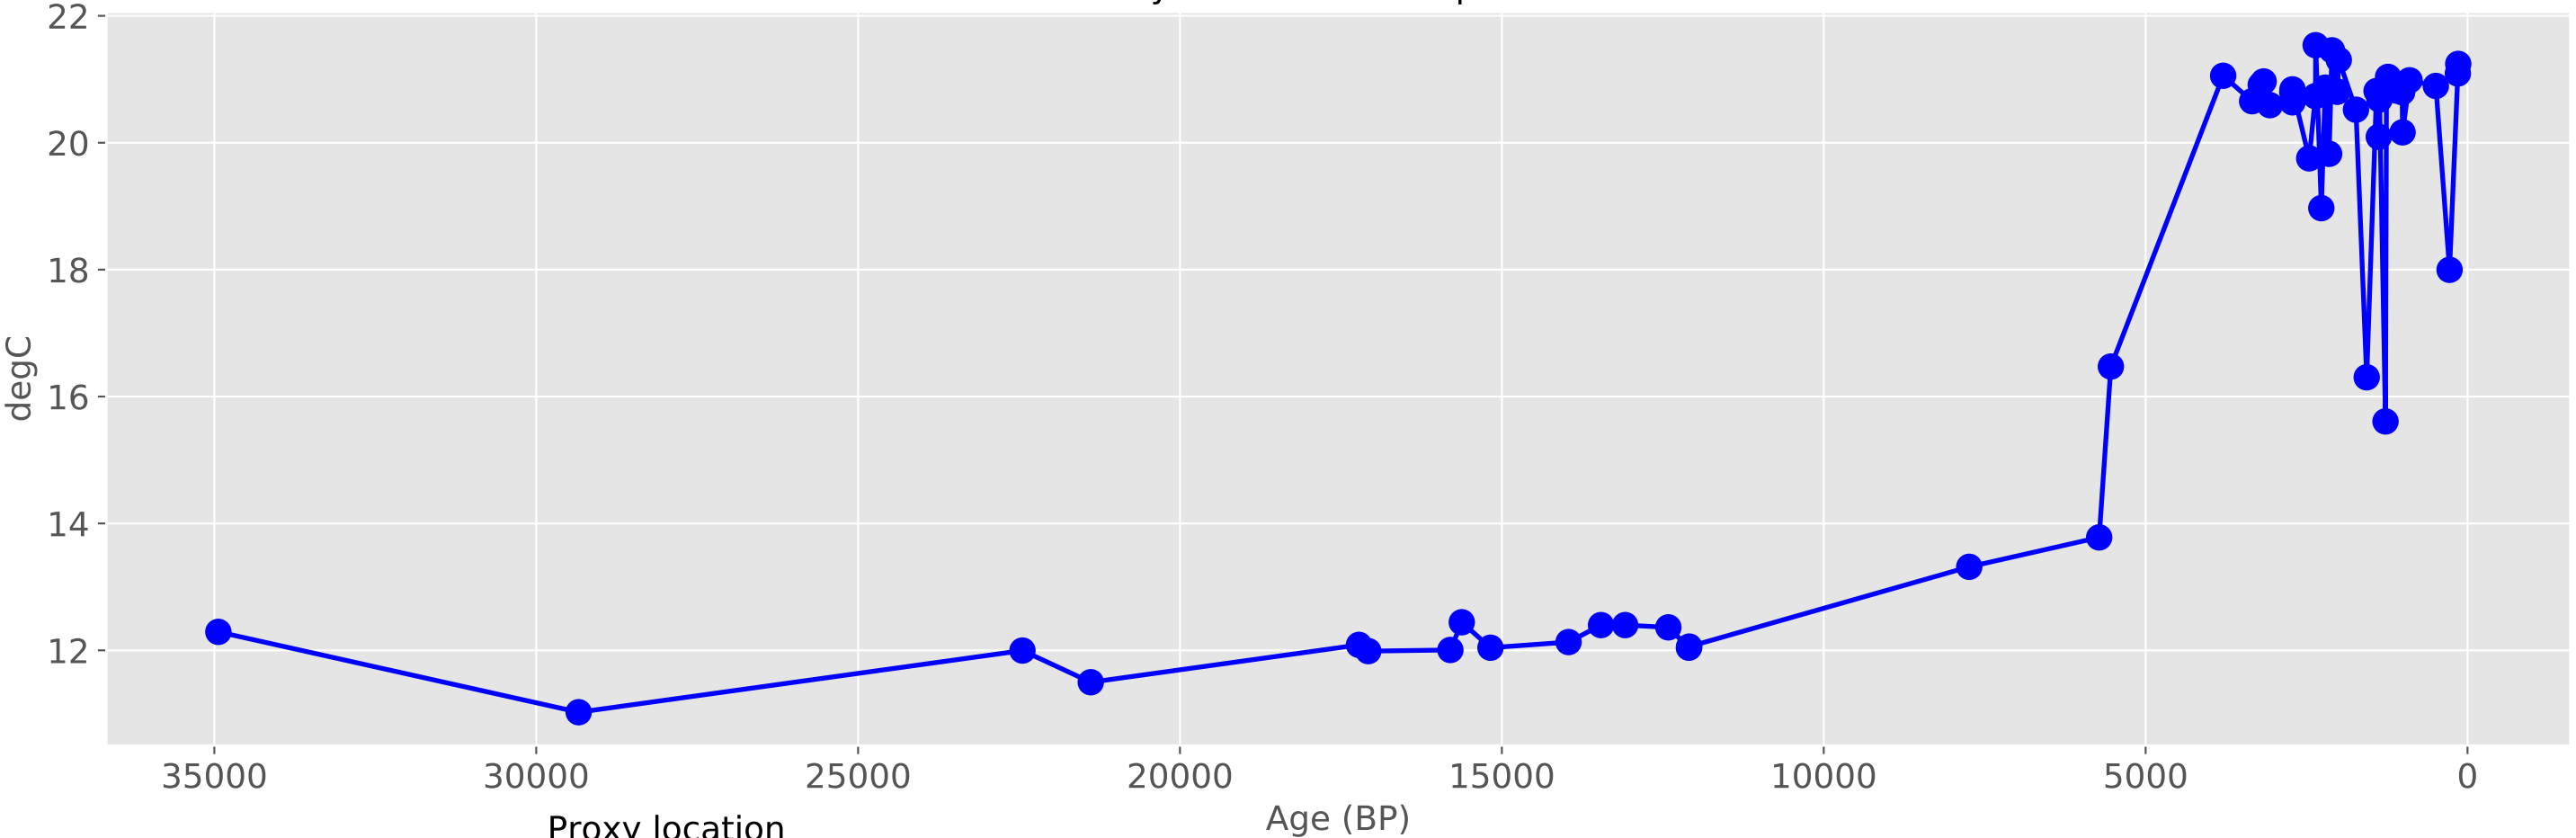

Proxy location  
(32.31 ° N, 109.10 ° W)



|                    |                                                       |
|--------------------|-------------------------------------------------------|
| Dataset name:      | MiddenCluster8.Harbert.2018                           |
| Archive type:      | Midden                                                |
| Proxy type:        | macrofossils                                          |
| Variable name:     | temperature                                           |
| Latitude ( ° N):   | 32.3106                                               |
| Longitude ( ° E):  | -109.0977                                             |
| Elevation (m):     | 1339.0                                                |
| Interp. variable:  | T                                                     |
| Interp. detail:    | air@surface                                           |
| Interp. season:    | annual                                                |
| Interp. direction: | positive                                              |
| Pub. 1 title:      | Quantitative Late Quaternary climate reconstructio... |
| Pub. 1 authors:    | Harbert, Robert S.; Nixon, Kevin C.                   |
| Pub. 1 year:       | 2018                                                  |
| Pub. 1 DOI:        | 10.5334/oq.46                                         |
| Original data URL: | geochange.er.usgs.gov/midden/                         |



Proxy data and metadata

Midden | macrofossils | MiddenCluster8.Harbert.2018 | WEBf52f4207

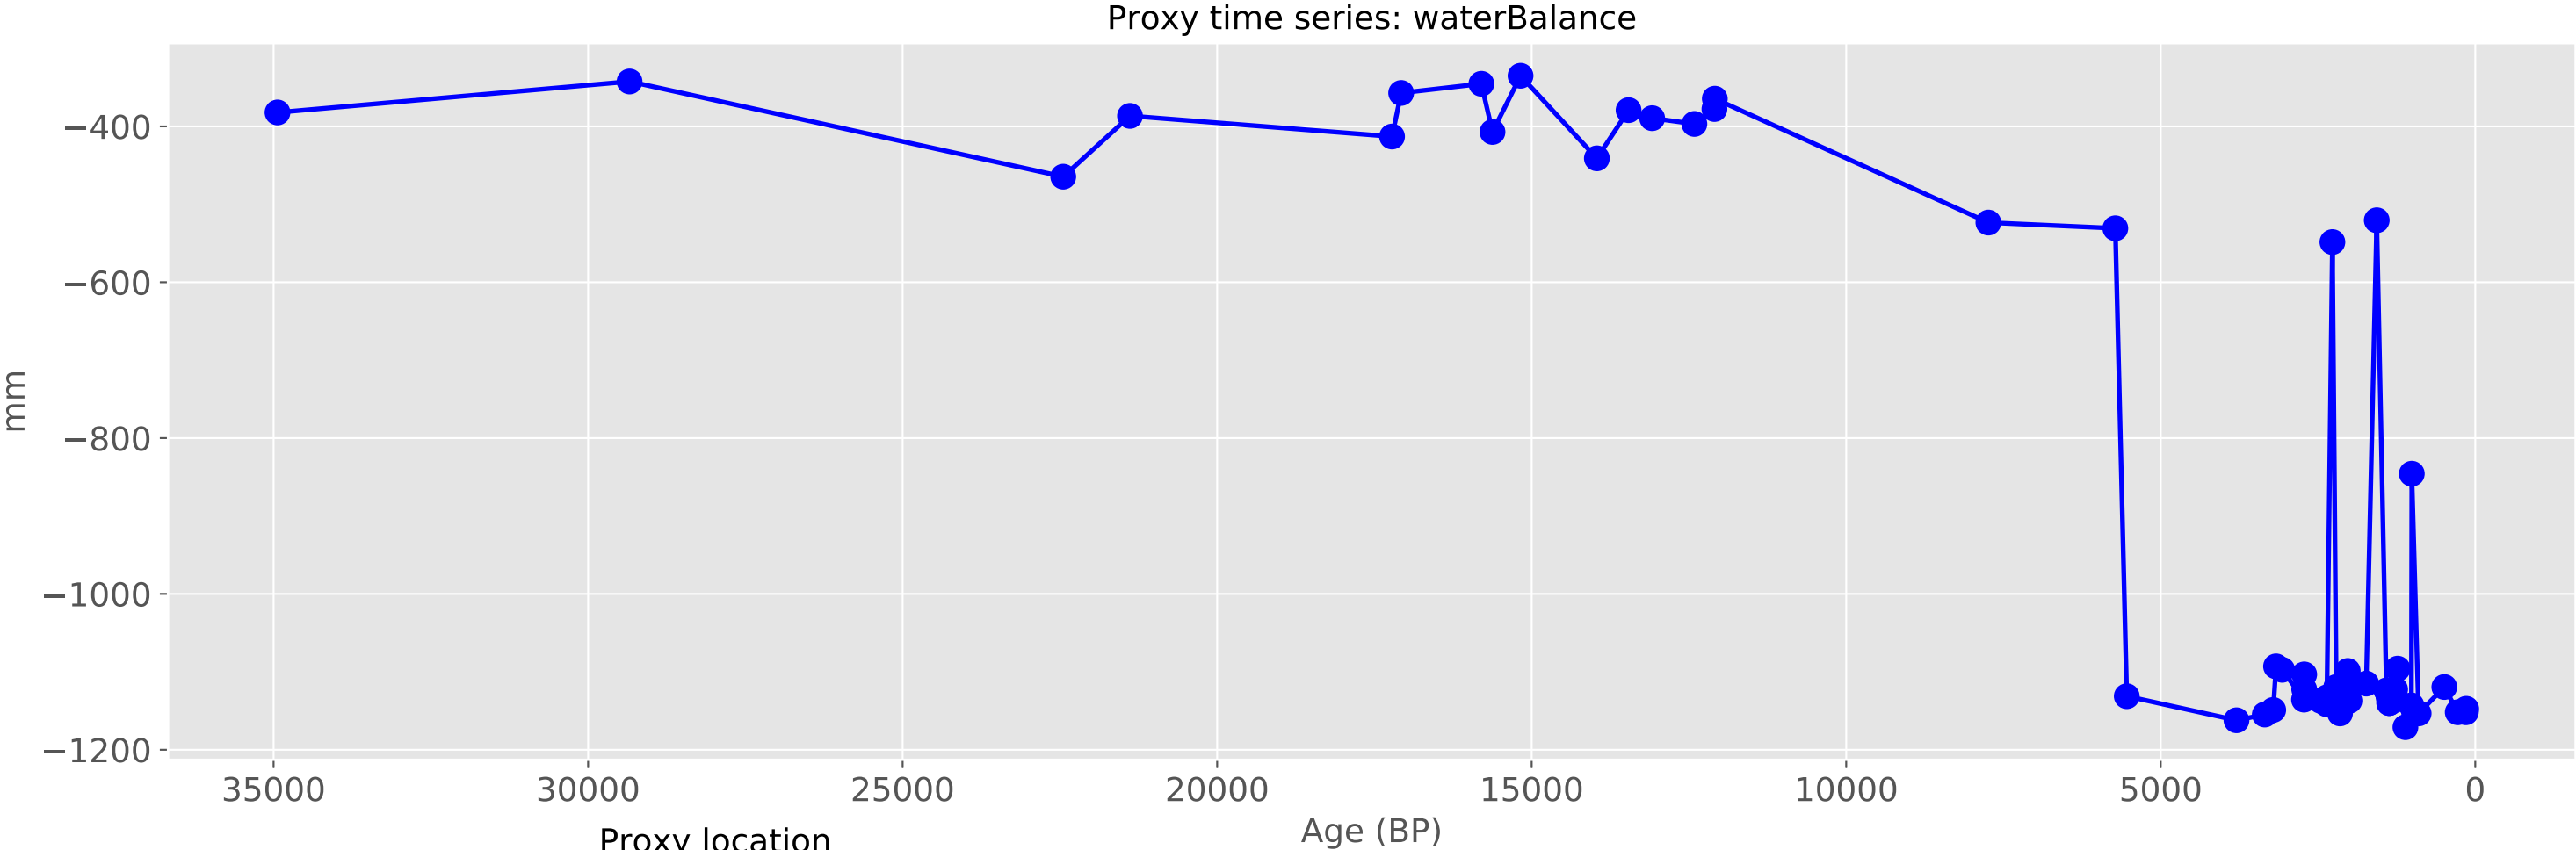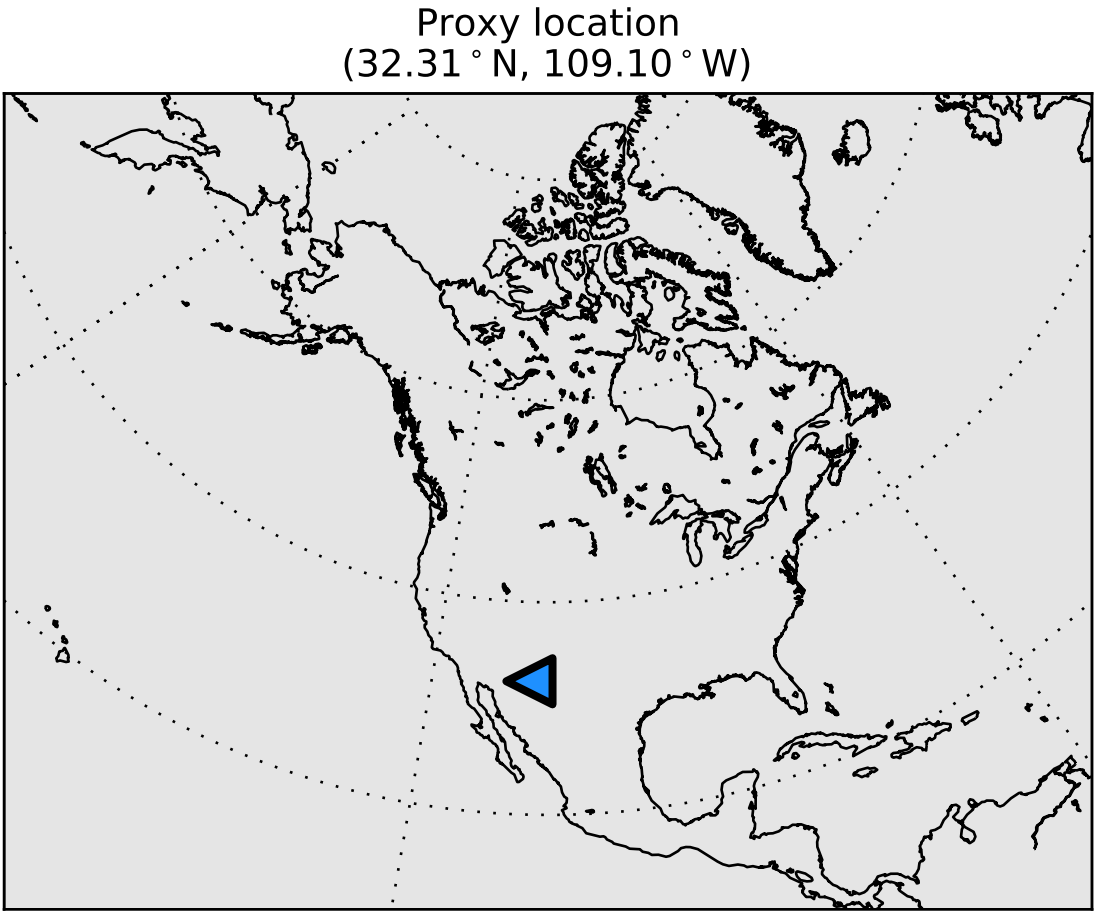

|                    |                                                       |
|--------------------|-------------------------------------------------------|
| Dataset name:      | MiddenCluster8.Harbert.2018                           |
| Archive type:      | Midden                                                |
| Proxy type:        | macrofossils                                          |
| Variable name:     | waterBalance                                          |
| Latitude ( ° N):   | 32.3106                                               |
| Longitude ( ° E):  | -109.0977                                             |
| Elevation (m):     | 1339.0                                                |
| Interp. variable:  | P-E                                                   |
| Interp. detail:    | @surface                                              |
| Interp. season:    | annual                                                |
| Interp. direction: | positive                                              |
| Pub. 1 title:      | Quantitative Late Quaternary climate reconstructio... |
| Pub. 1 authors:    | Harbert, Robert S.; Nixon, Kevin C.                   |
| Pub. 1 year:       | 2018                                                  |
| Pub. 1 DOI:        | 10.5334/oq.46                                         |
| Original data URL: | geochange.er.usgs.gov/midden/                         |

Proxy data and metadata

Midden | macrofossils | MiddenCluster9.Harbert.2018 | WEB00c20586

Proxy time series: precipitation

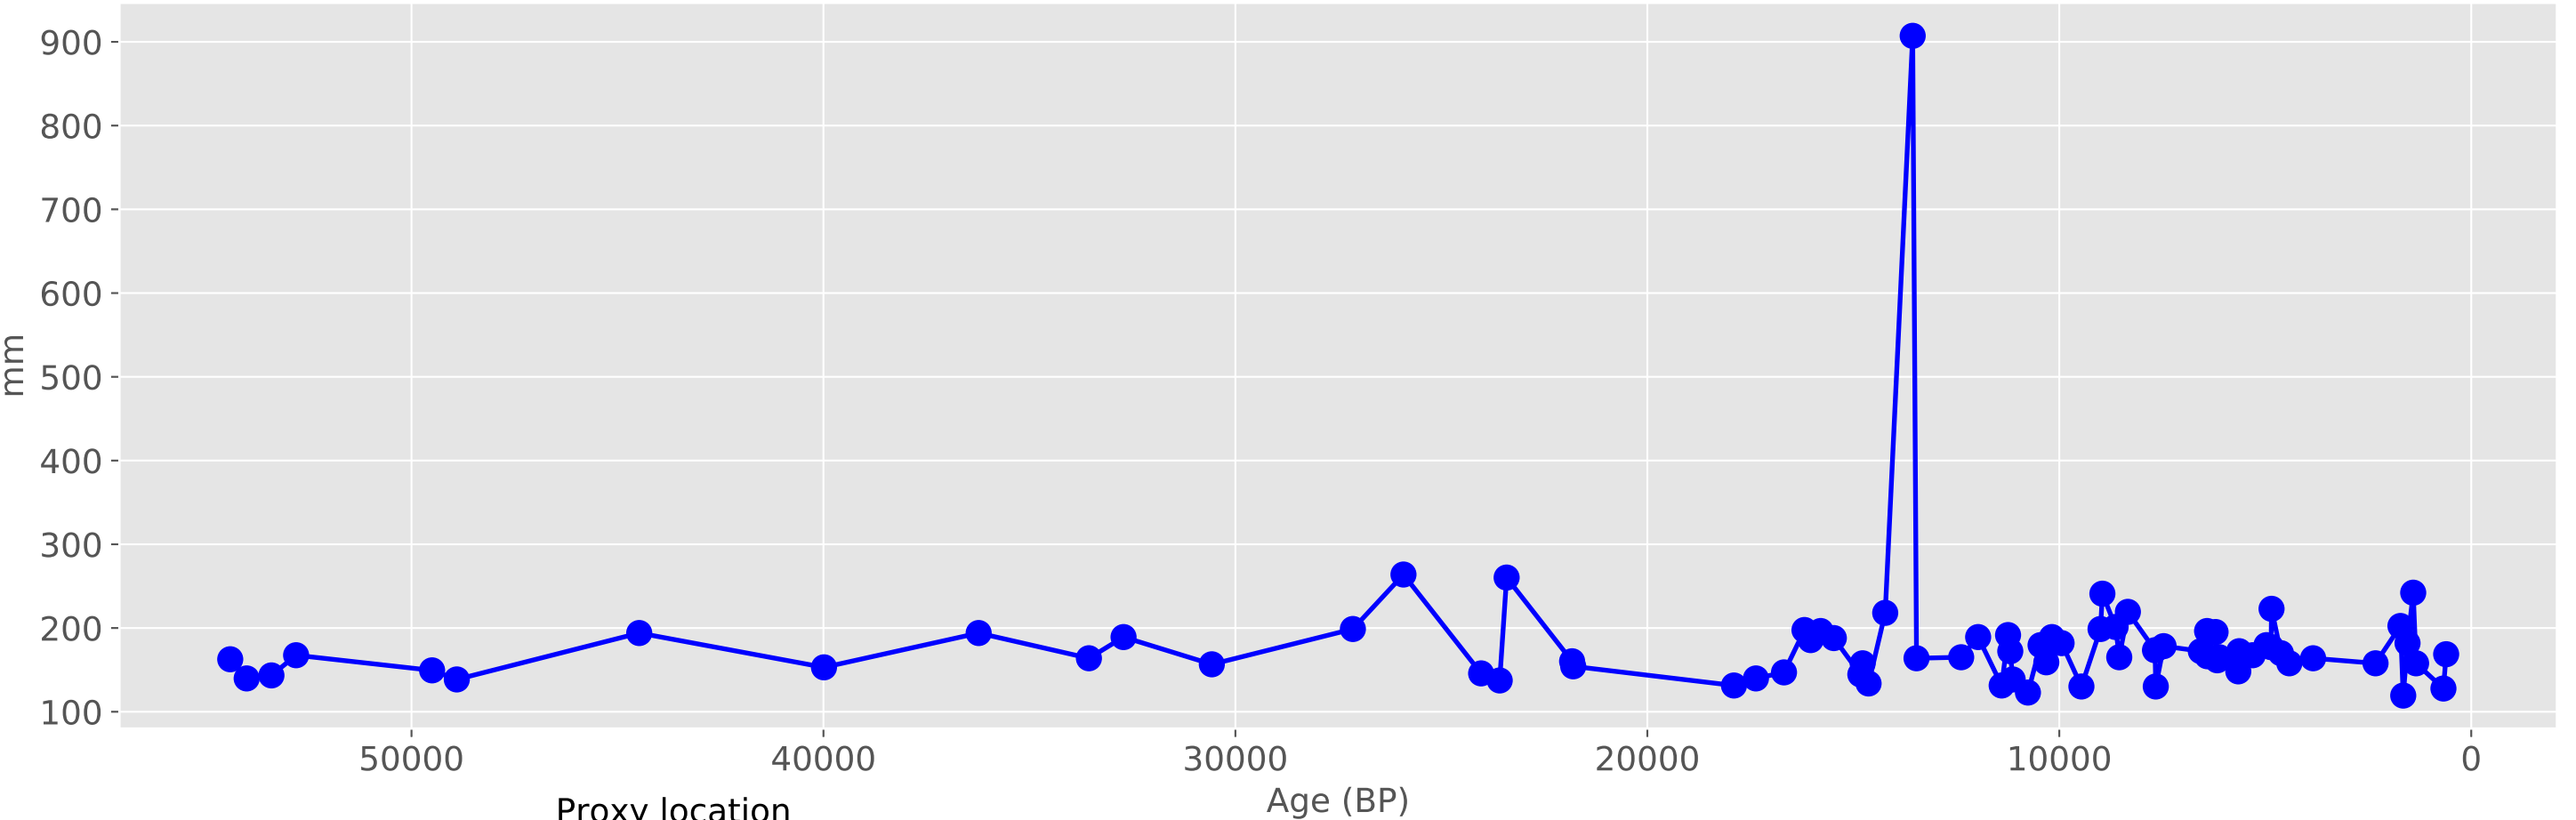

Proxy location  
(31.64 ° N, 115.55 ° W)

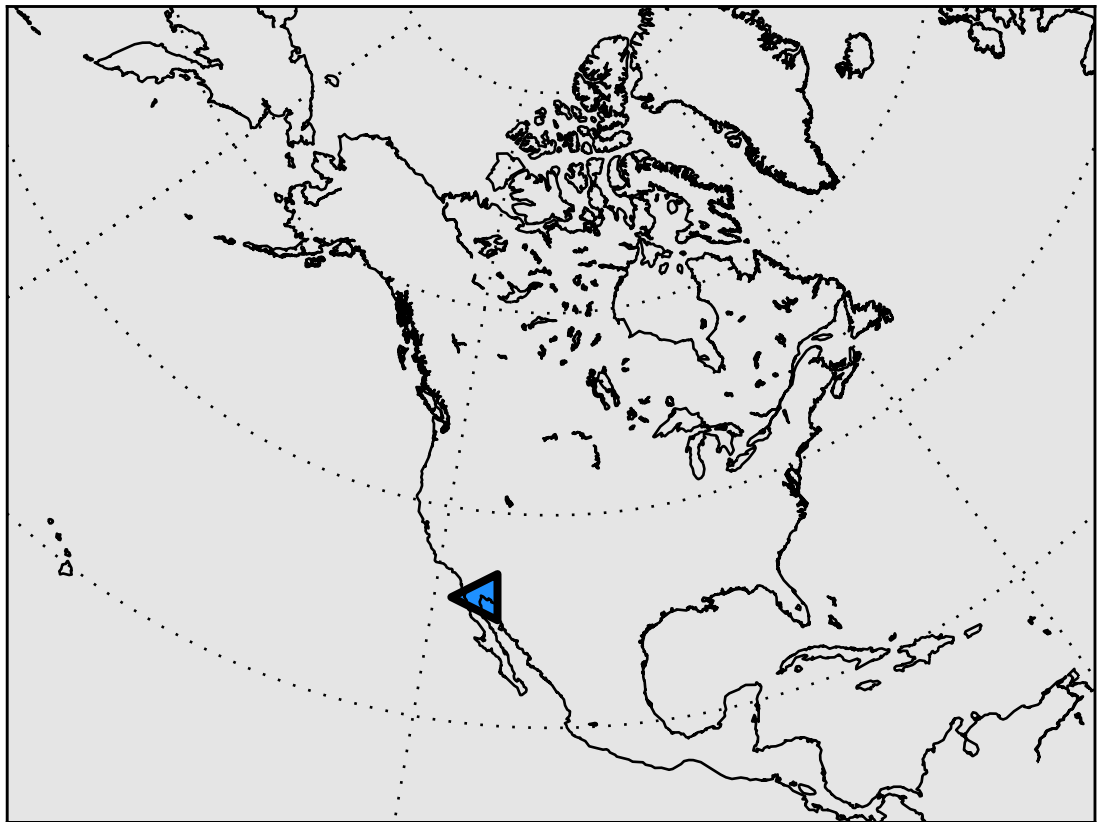

|                    |                                                       |
|--------------------|-------------------------------------------------------|
| Dataset name:      | MiddenCluster9.Harbert.2018                           |
| Archive type:      | Midden                                                |
| Proxy type:        | macrofossils                                          |
| Variable name:     | precipitation                                         |
| Latitude ( ° N):   | 31.6387                                               |
| Longitude ( ° E):  | -115.5548                                             |
| Elevation (m):     | 782.0                                                 |
| Interp. variable:  | P                                                     |
| Interp. detail:    | amount@surface                                        |
| Interp. season:    | annual                                                |
| Interp. direction: | positive                                              |
| Pub. 1 title:      | Quantitative Late Quaternary climate reconstructio... |
| Pub. 1 authors:    | Harbert, Robert S.; Nixon, Kevin C.                   |
| Pub. 1 year:       | 2018                                                  |
| Pub. 1 DOI:        | 10.5334/oq.46                                         |
| Original data URL: | geochange.er.usgs.gov/midden/                         |

**Proxy data and metadata**  
**Midden | macrofossils | MiddenCluster9.Harbert.2018 | WEBa31332029**

Proxy time series: temperature

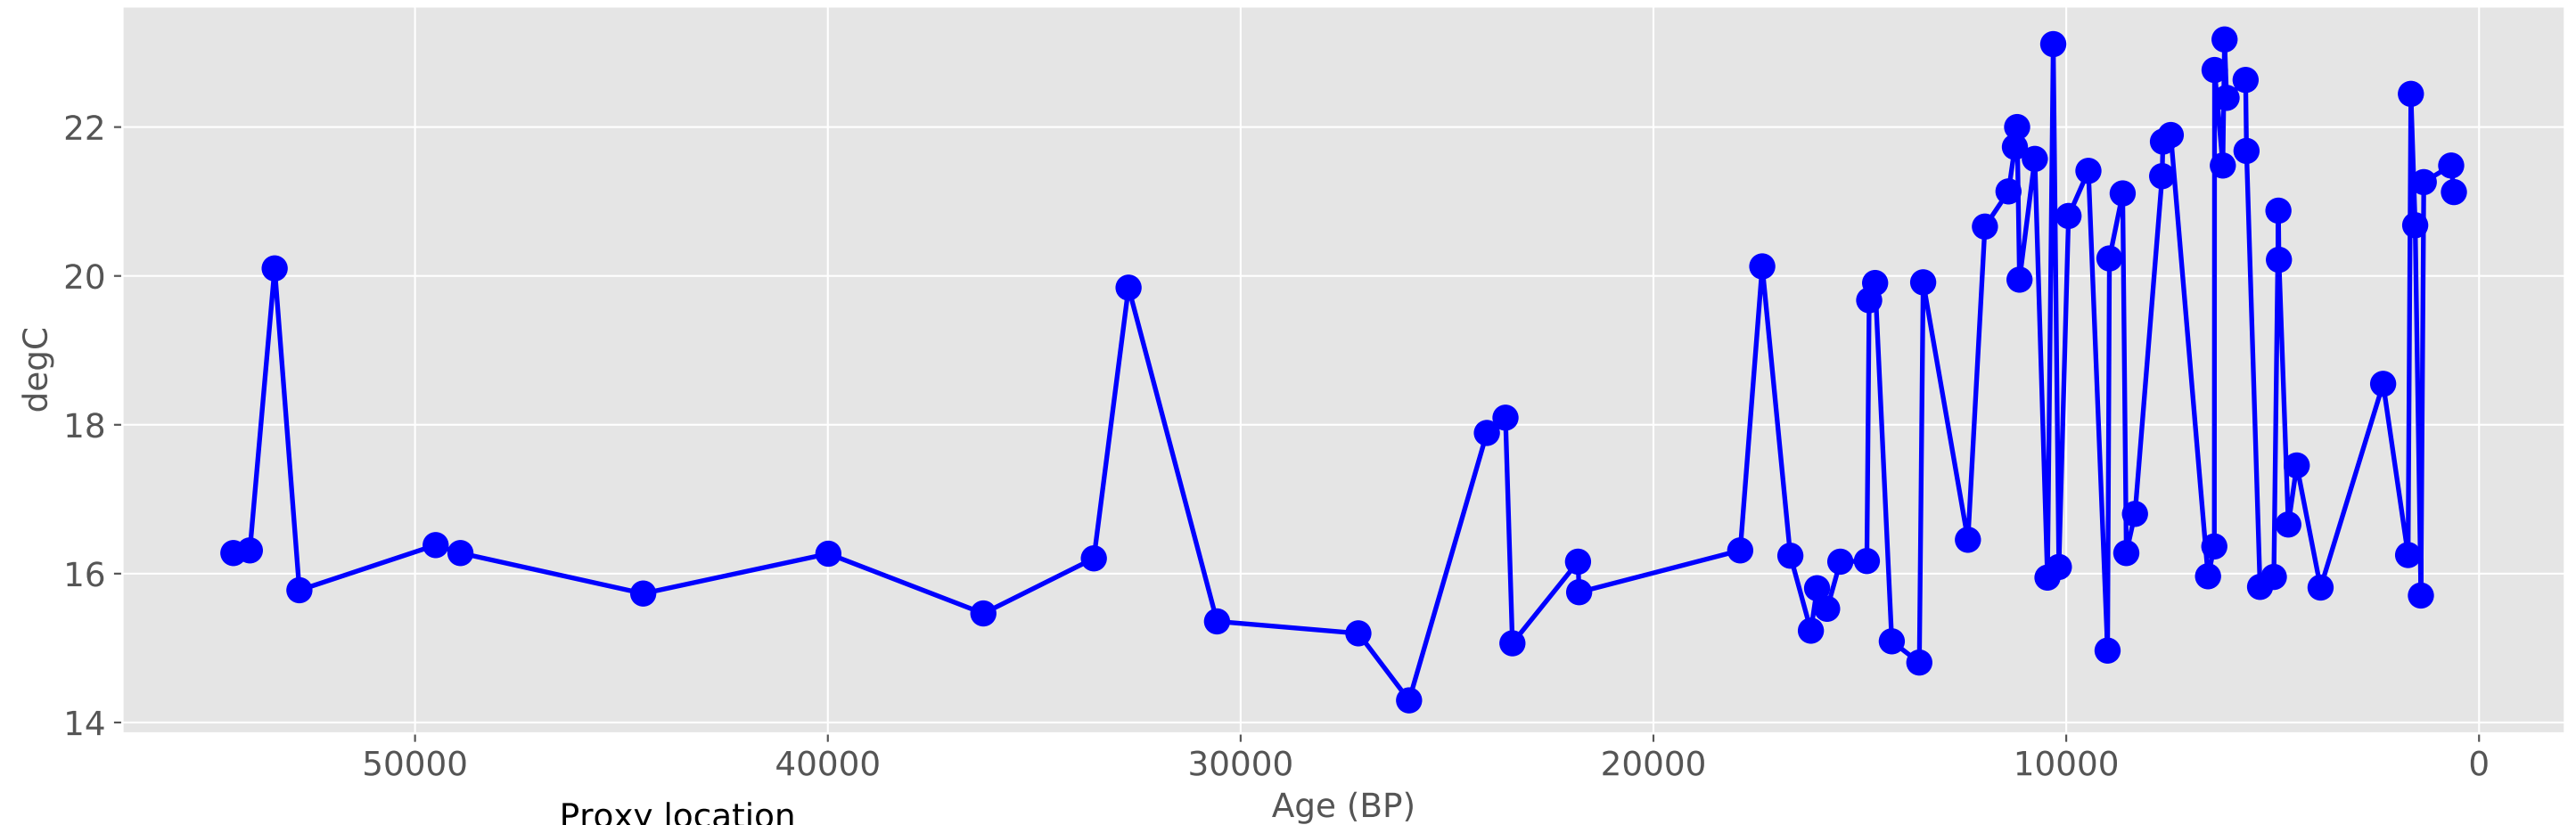

Proxy location  
(31.64° N, 115.55° W)

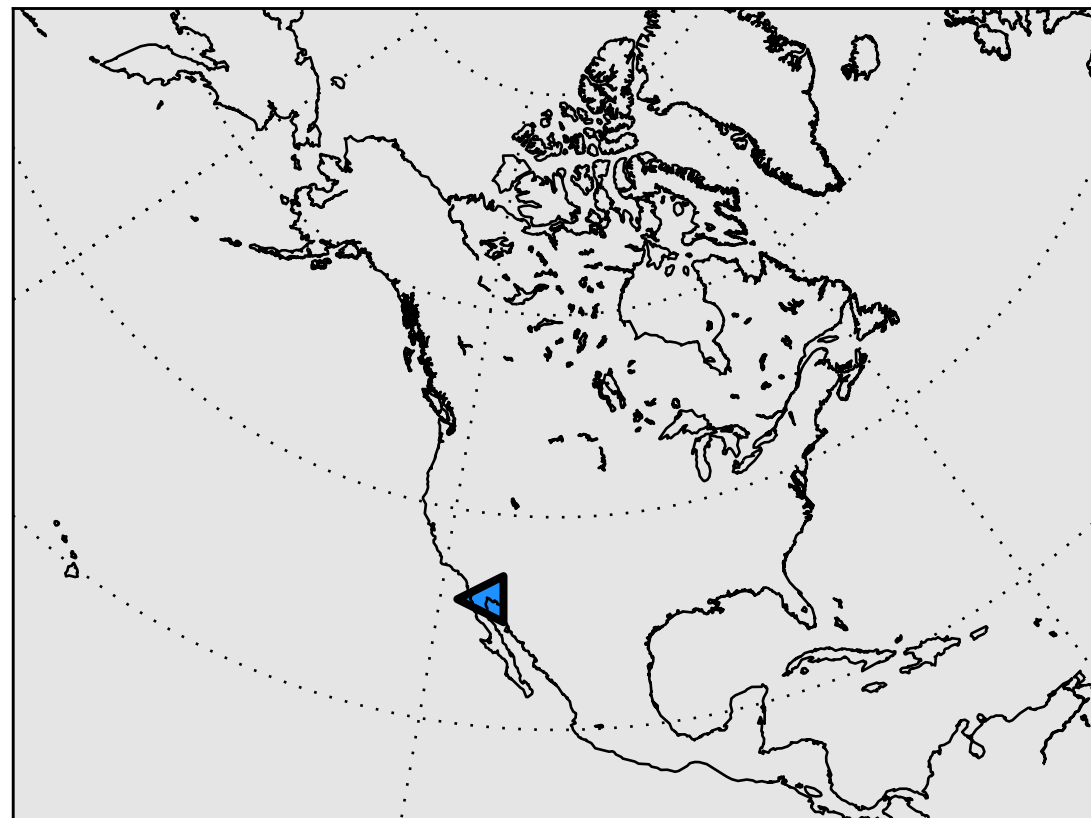

|                    |                                                       |
|--------------------|-------------------------------------------------------|
| Dataset name:      | MiddenCluster9.Harbert.2018                           |
| Archive type:      | Midden                                                |
| Proxy type:        | macrofossils                                          |
| Variable name:     | temperature                                           |
| Latitude (° N):    | 31.6387                                               |
| Longitude (° E):   | -115.5548                                             |
| Elevation (m):     | 782.0                                                 |
| Interp. variable:  | T                                                     |
| Interp. detail:    | air@surface                                           |
| Interp. season:    | annual                                                |
| Interp. direction: | positive                                              |
| Pub. 1 title:      | Quantitative Late Quaternary climate reconstructio... |
| Pub. 1 authors:    | Harbert, Robert S.; Nixon, Kevin C.                   |
| Pub. 1 year:       | 2018                                                  |
| Pub. 1 DOI:        | 10.5334/oq.46                                         |
| Original data URL: | geochange.er.usgs.gov/midden/                         |

Proxy data and metadata  
Midden | macrofossils | MiddenCluster9.Harbert.2018 | WEBbae8d58a

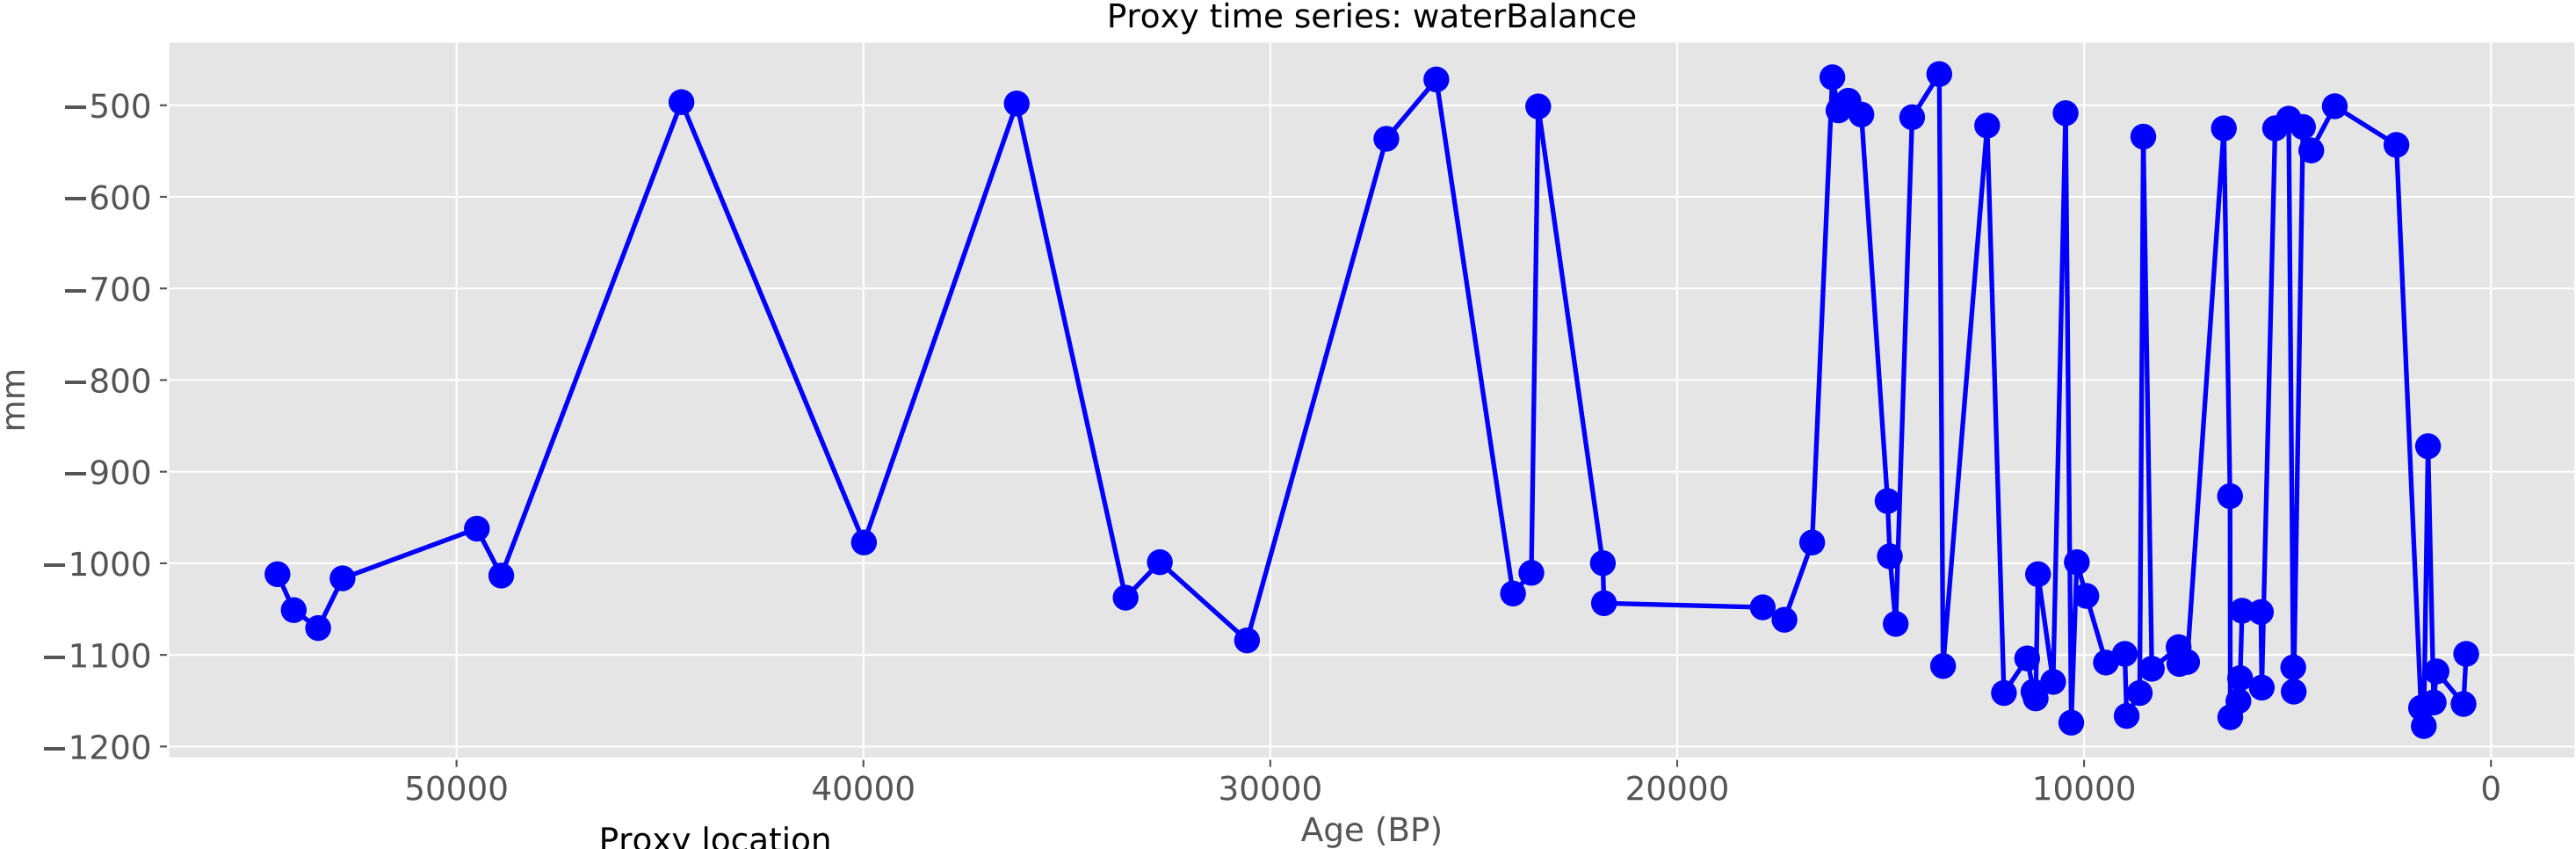

Proxy location  
(31.64 ° N, 115.55 ° W)

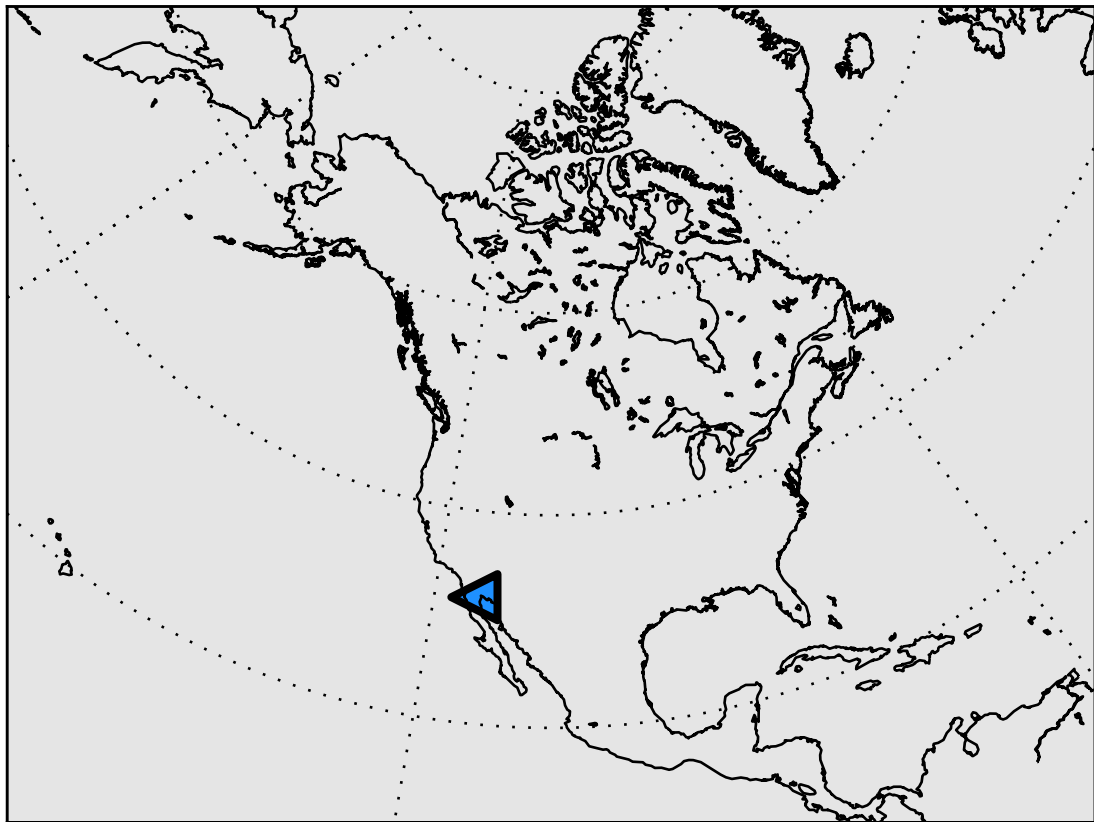

|                    |                                                       |
|--------------------|-------------------------------------------------------|
| Dataset name:      | MiddenCluster9.Harbert.2018                           |
| Archive type:      | Midden                                                |
| Proxy type:        | macrofossils                                          |
| Variable name:     | waterBalance                                          |
| Latitude ( ° N):   | 31.6387                                               |
| Longitude ( ° E):  | -115.5548                                             |
| Elevation (m):     | 782.0                                                 |
| Interp. variable:  | P-E                                                   |
| Interp. detail:    | @surface                                              |
| Interp. season:    | annual                                                |
| Interp. direction: | positive                                              |
| Pub. 1 title:      | Quantitative Late Quaternary climate reconstructio... |
| Pub. 1 authors:    | Harbert, Robert S.; Nixon, Kevin C.                   |
| Pub. 1 year:       | 2018                                                  |
| Pub. 1 DOI:        | 10.5334/oq.46                                         |
| Original data URL: | geochange.er.usgs.gov/midden/                         |

Proxy data and metadata

Peat | DBD | UpperPintoFen.Yu.2003 | LPDe806555f

Proxy time series: peatFlux

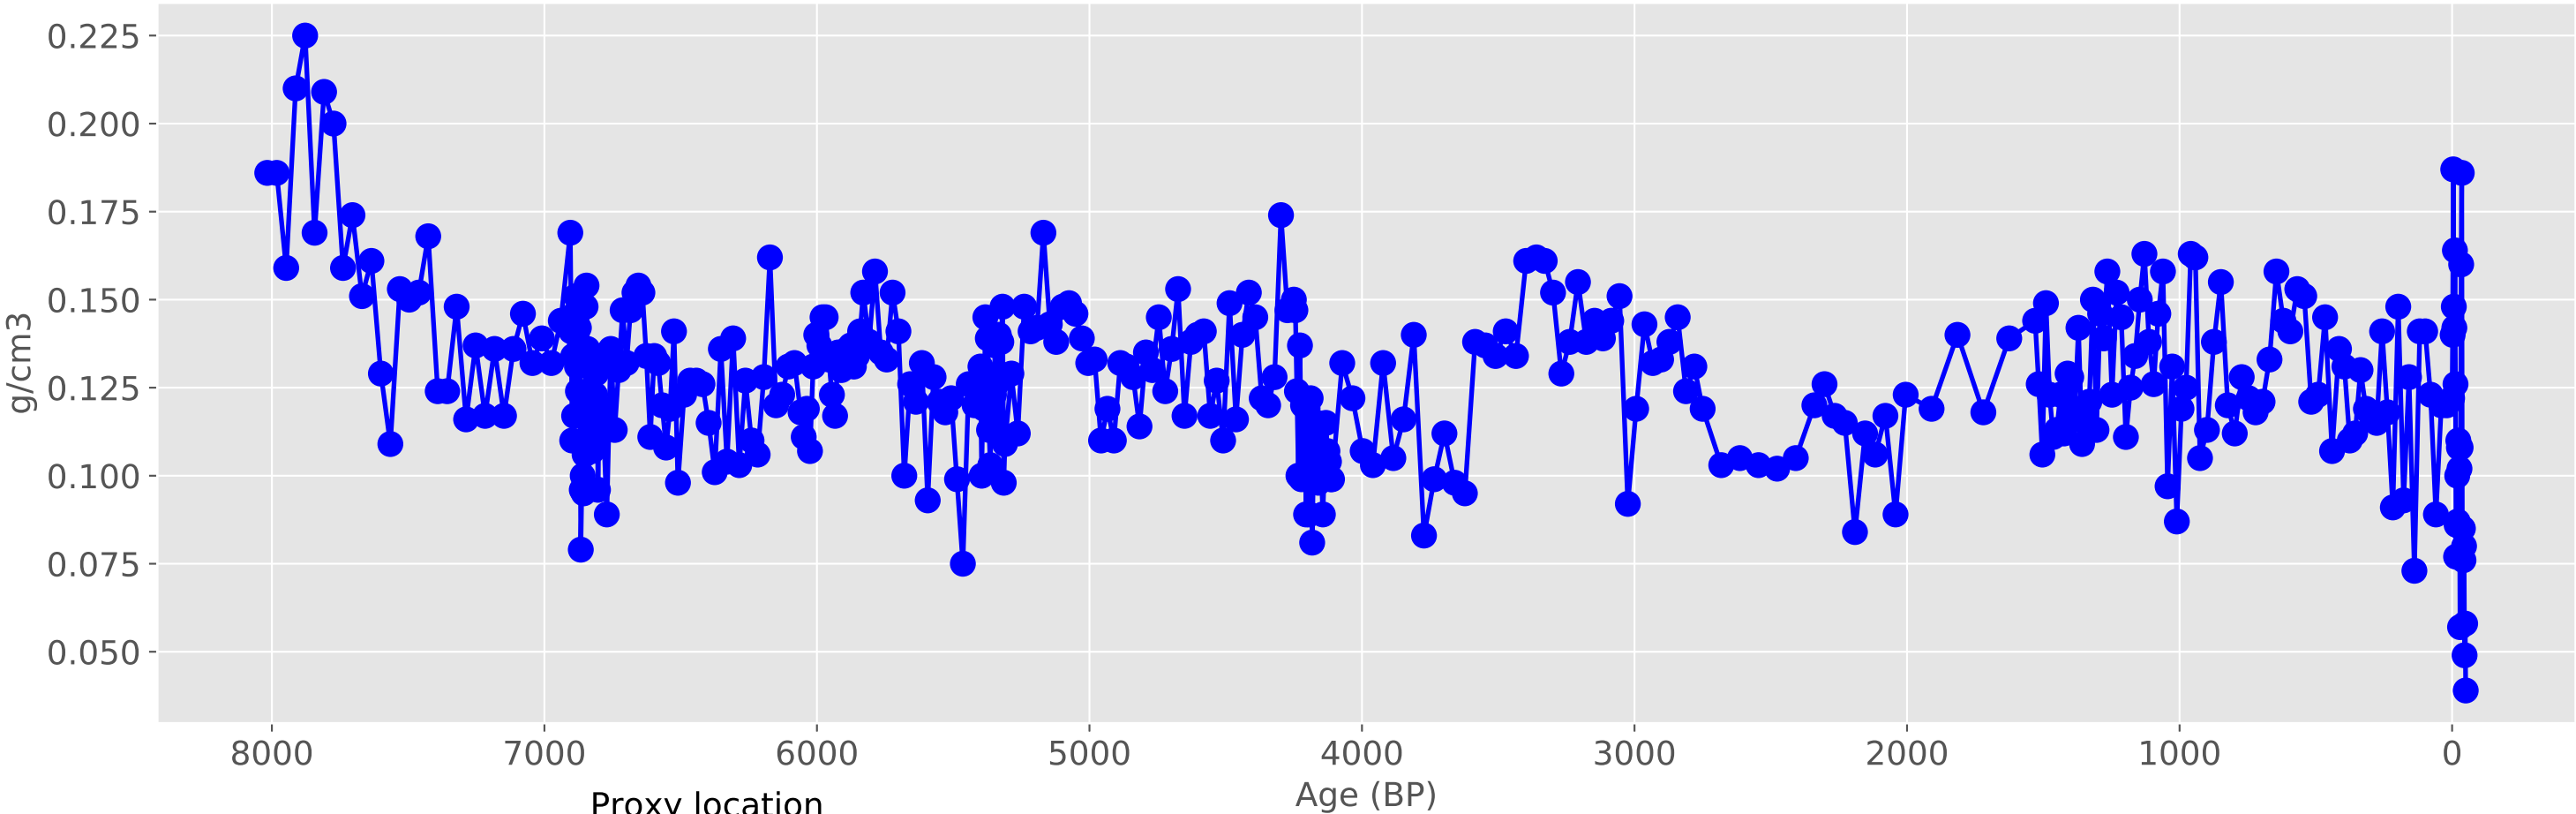

Proxy location  
(53.58 ° N, 118.02 ° W)

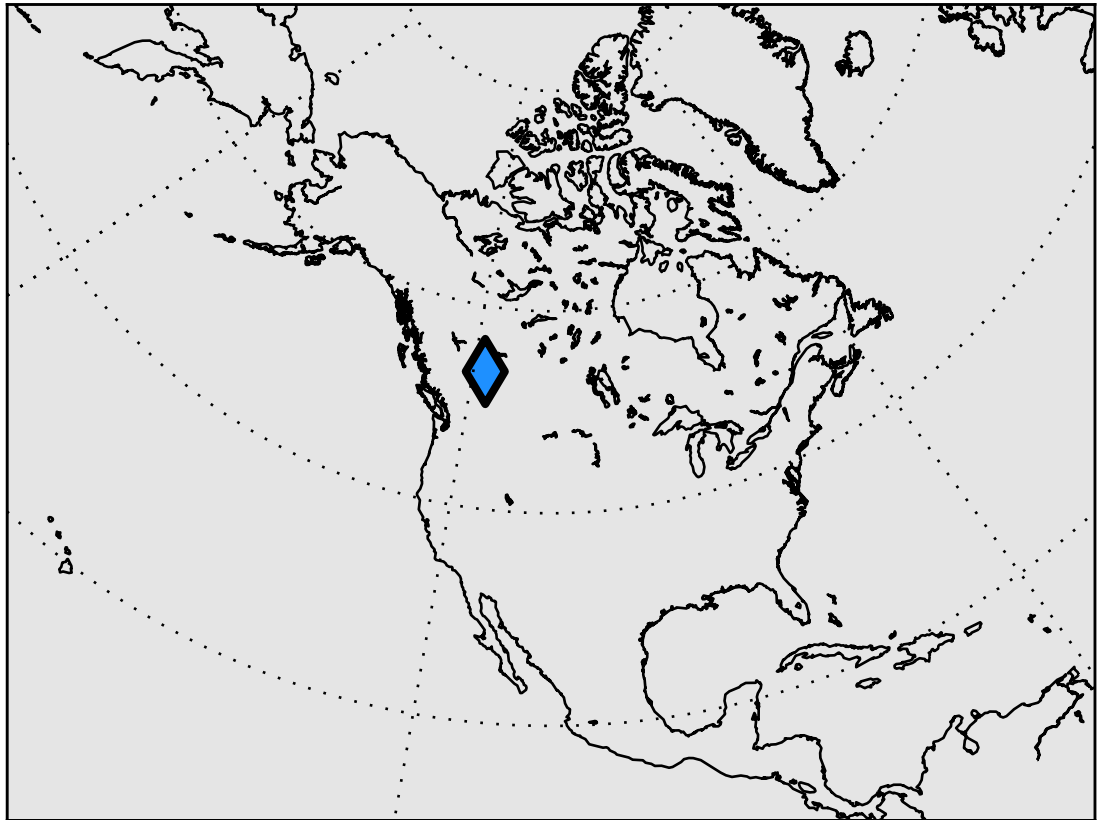

|                    |                                                                                              |
|--------------------|----------------------------------------------------------------------------------------------|
| Dataset name:      | UpperPintoFen.Yu.2003                                                                        |
| Archive type:      | Peat                                                                                         |
| Proxy type:        | DBD                                                                                          |
| Variable name:     | peatFlux                                                                                     |
| Latitude ( ° N):   | 53.5833                                                                                      |
| Longitude ( ° E):  | -118.0167                                                                                    |
| Elevation (m):     | 1310.0                                                                                       |
| Interp. variable:  | P-E                                                                                          |
| Interp. detail:    | @surface                                                                                     |
| Interp. season:    | annual                                                                                       |
| Interp. direction: | negative                                                                                     |
| Pub. 1 title:      | Carbon sequestration in western Canadian peat high...                                        |
| Pub. 1 authors:    | Yu, Zicheng;Campbell, Ian D.;Campbell, Celina;Vitt...                                        |
| Pub. 1 year:       | 2003                                                                                         |
| Pub. 1 DOI:        | 10.1191/0959683603hl667ft                                                                    |
| Original data URL: | <a href="http://www.ncdc.noaa.gov/paleo/study/13665">www.ncdc.noaa.gov/paleo/study/13665</a> |

Proxy data and metadata  
Peat | dD | Corser.Nichols.2014 | PYTZYIC0QP8

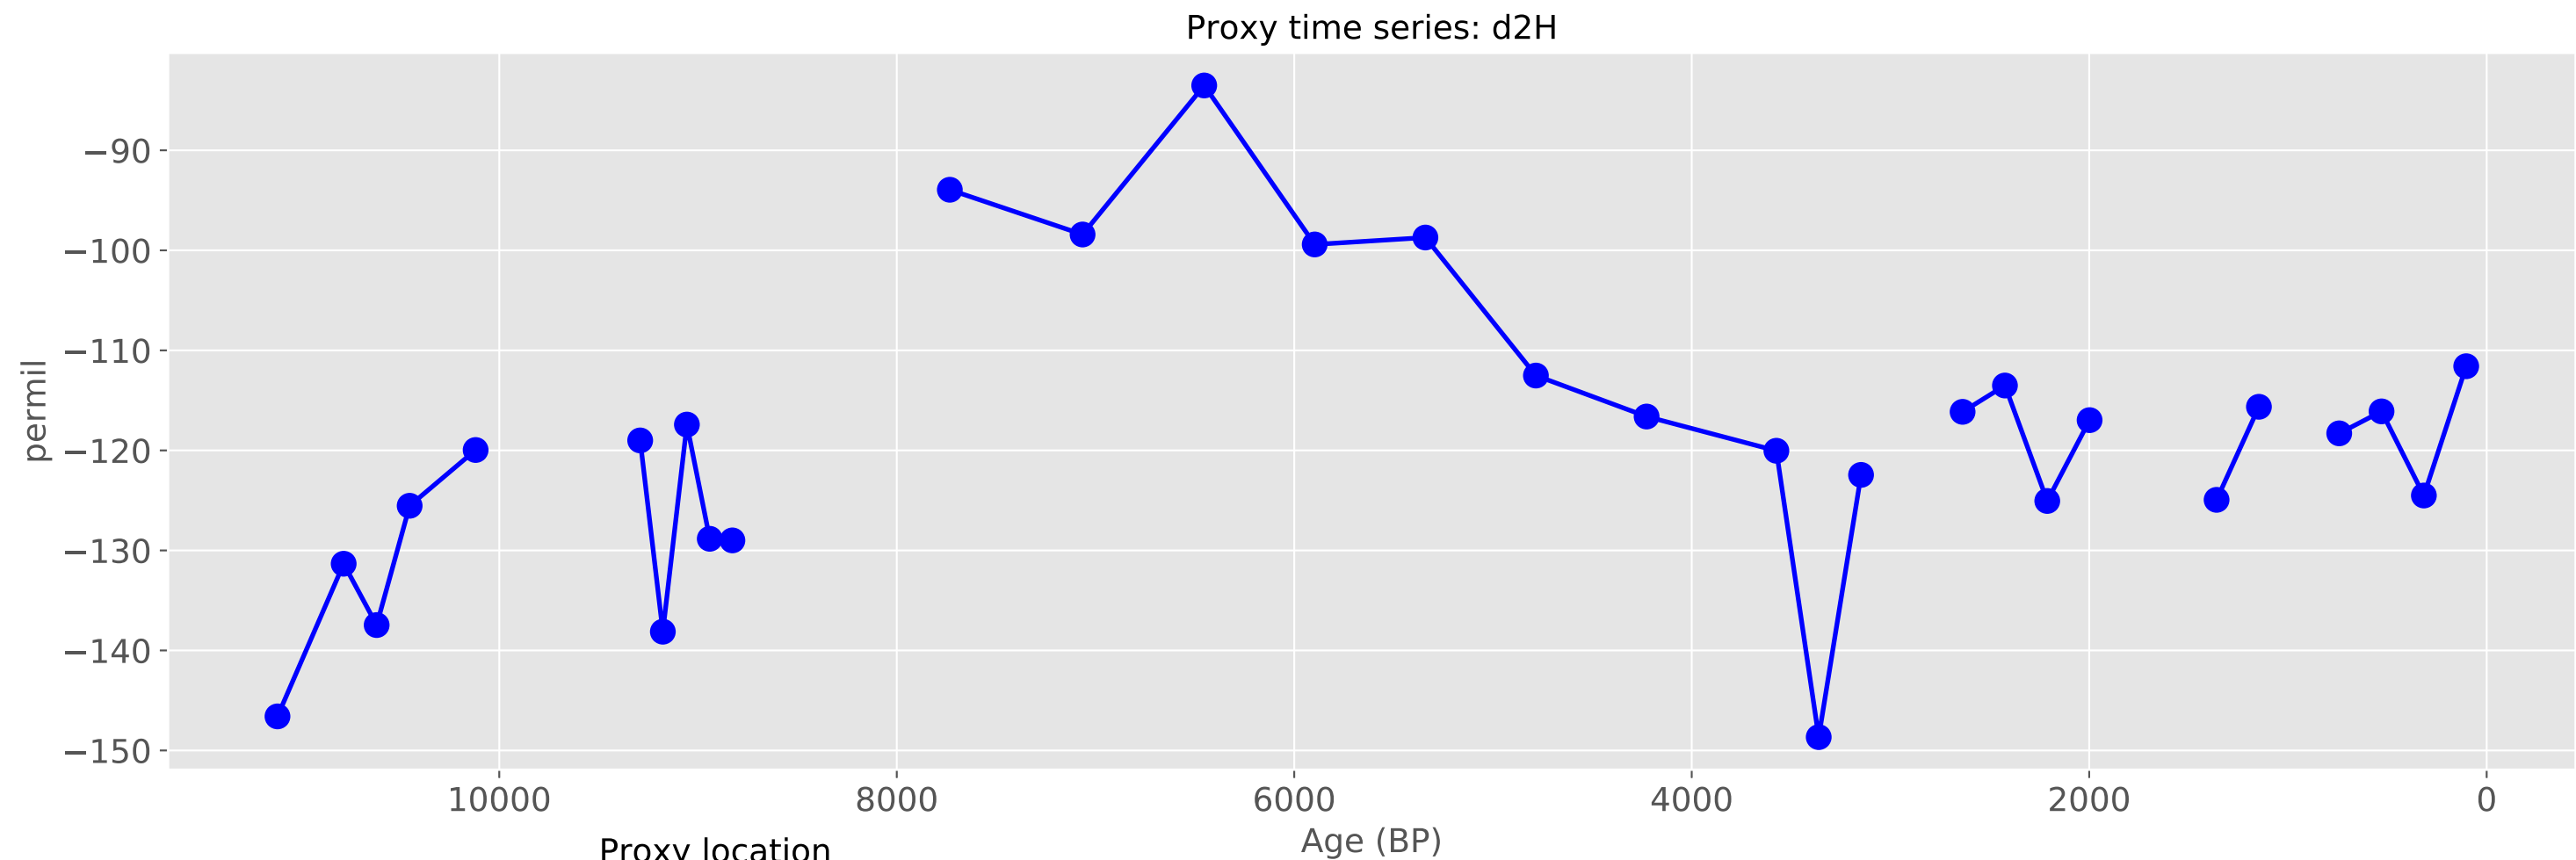

Proxy location  
(60.53 ° N, 145.45 ° W)

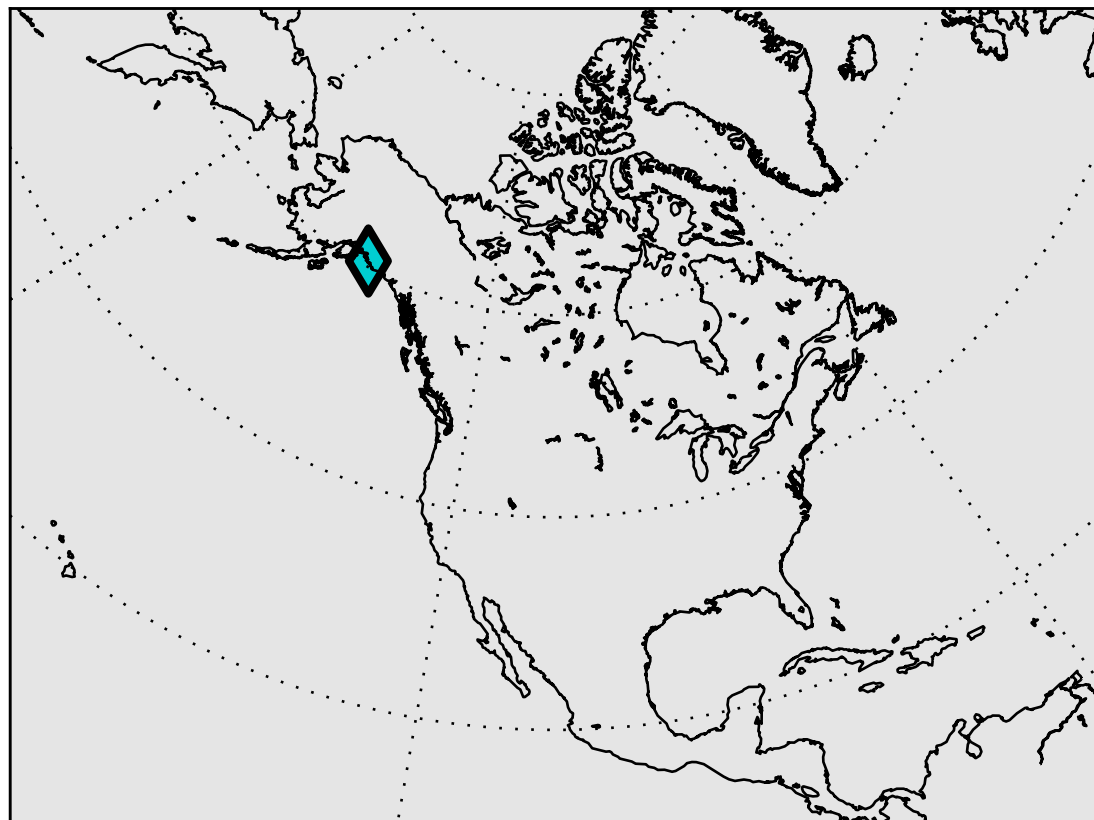

|                    |                                                       |
|--------------------|-------------------------------------------------------|
| Dataset name:      | Corser.Nichols.2014                                   |
| Archive type:      | Peat                                                  |
| Proxy type:        | dD                                                    |
| Variable name:     | d2H                                                   |
| Latitude ( ° N):   | 60.53                                                 |
| Longitude ( ° E):  | -145.45                                               |
| Elevation (m):     | 70.0                                                  |
| Interp. variable:  | P-E                                                   |
| Interp. detail:    | @surface                                              |
| Interp. season:    | annual                                                |
| Interp. direction: | negative                                              |
| Pub. 1 title:      | Impacts of climate and vegetation change on carbon... |
| Pub. 1 authors:    | Nichols, Jonathan E; Peteet, Dorothy M; Moy, Chris... |
| Pub. 1 year:       | 2014                                                  |
| Pub. 1 DOI:        | 10.1177/0959683614540729                              |
| Original data URL: | www.ncdc.noaa.gov/paleo/study/15444                   |



Proxy data and metadata

Peat | GDGT | Corser.Nichols.2014 | PYTUQPUNFJT

Proxy time series: temperature

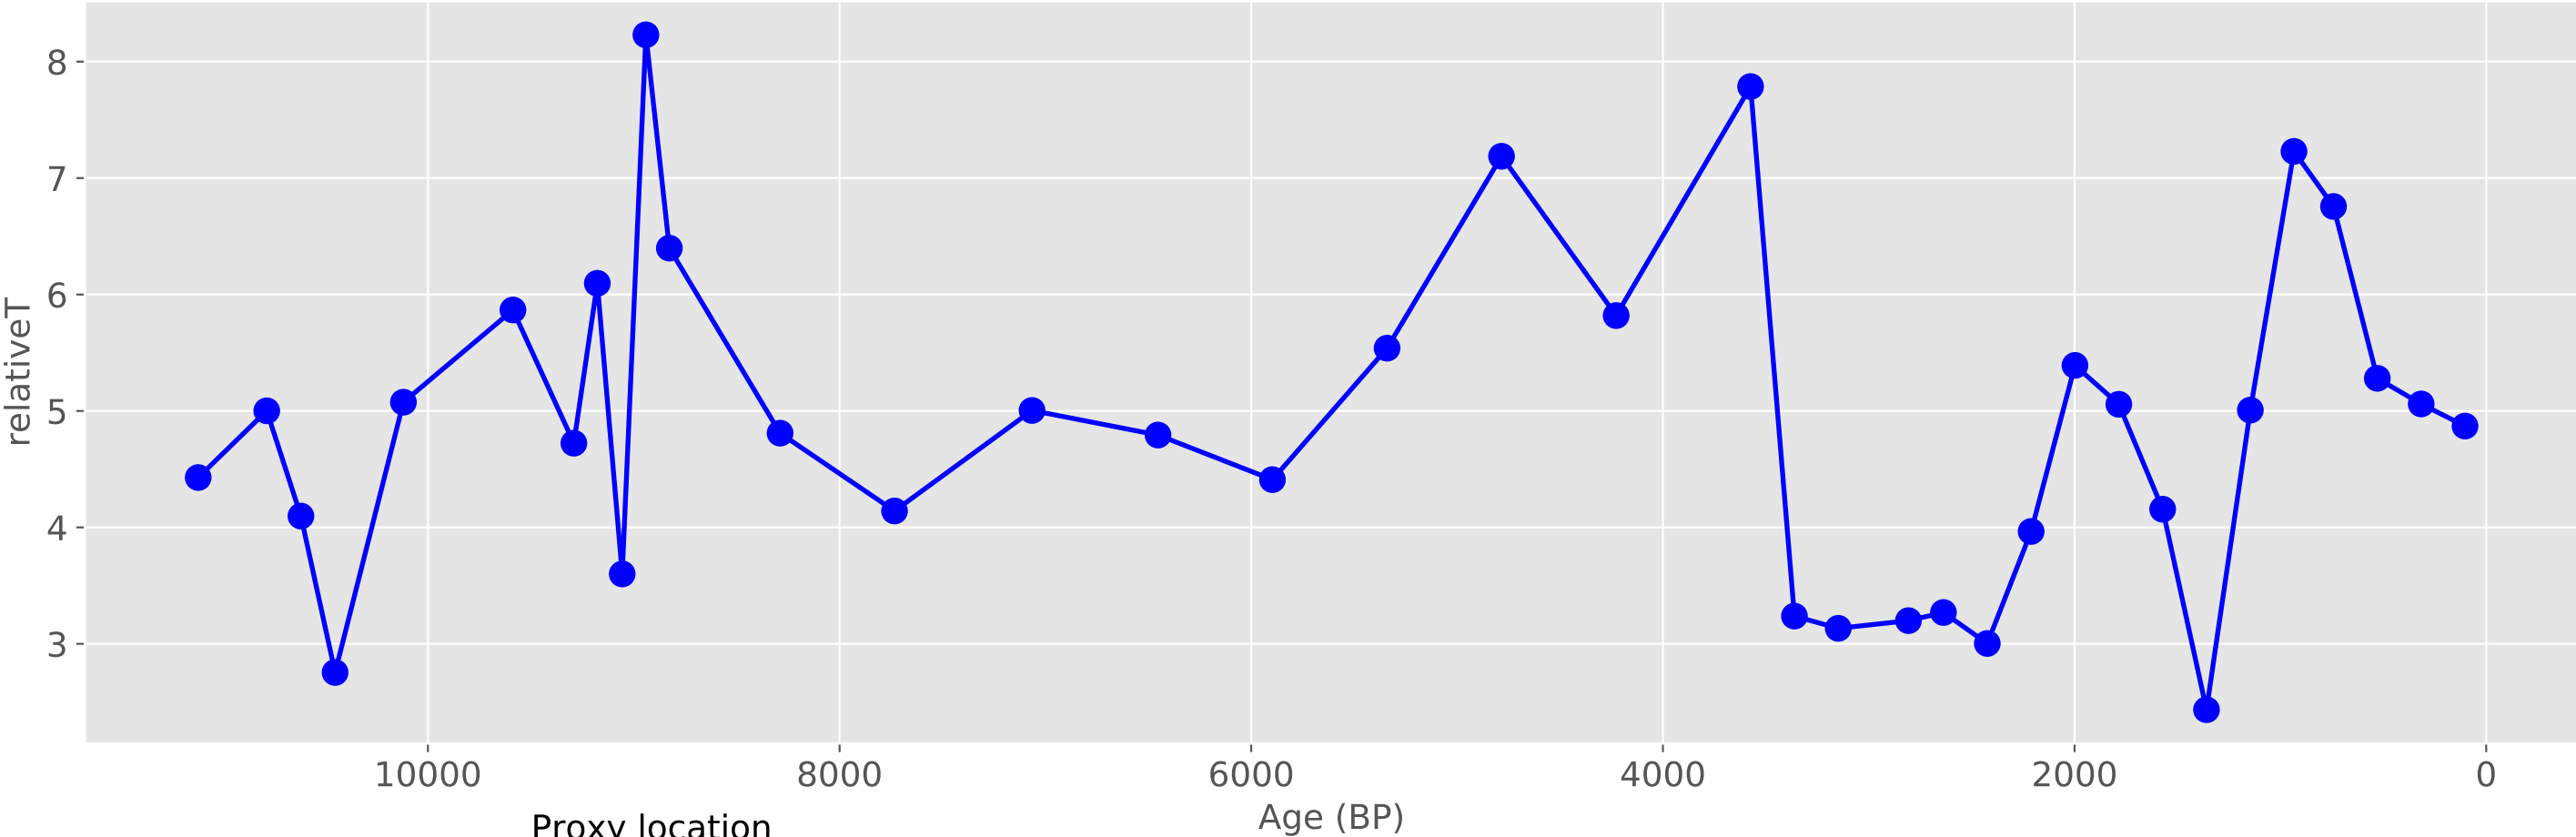

Proxy location  
(60.53 ° N, 145.45 ° W)

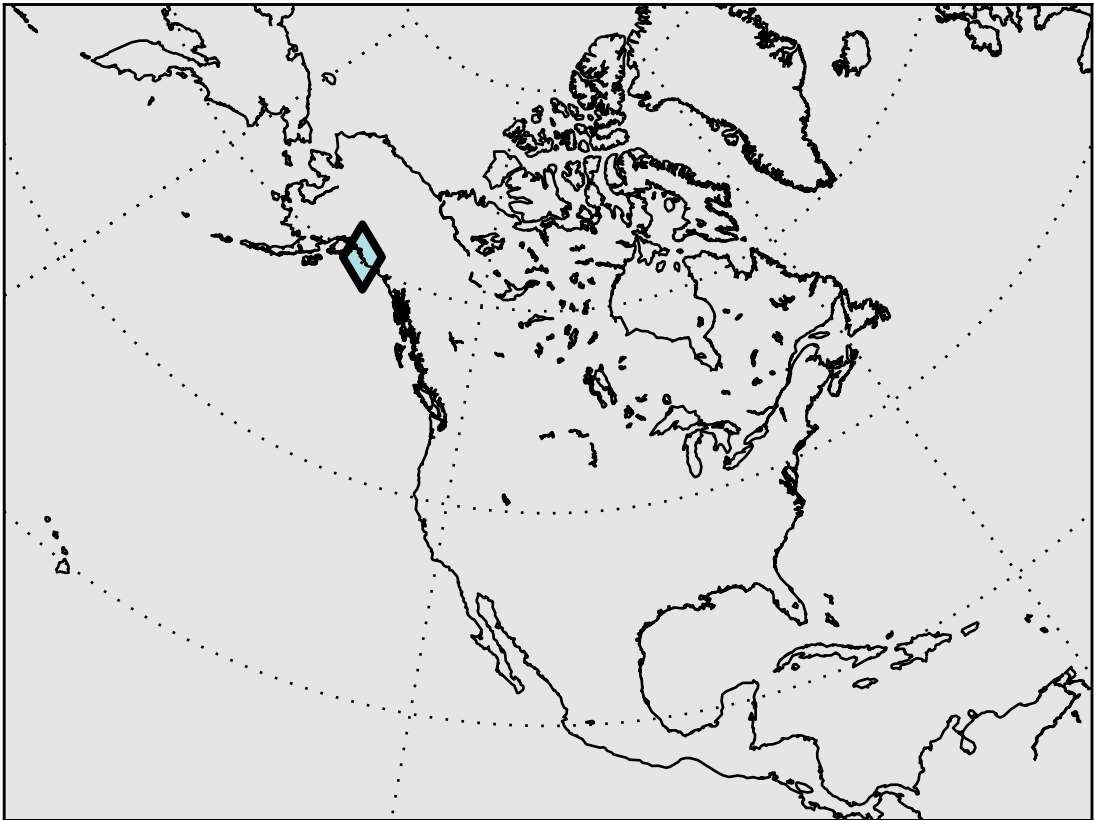

|                    |                                                       |
|--------------------|-------------------------------------------------------|
| Dataset name:      | Corser.Nichols.2014                                   |
| Archive type:      | Peat                                                  |
| Proxy type:        | GDGT                                                  |
| Variable name:     | temperature                                           |
| Latitude ( ° N):   | 60.53                                                 |
| Longitude ( ° E):  | -145.45                                               |
| Elevation (m):     | 70.0                                                  |
| Interp. variable:  | T                                                     |
| Interp. detail:    | air@surface                                           |
| Interp. season:    | annual                                                |
| Interp. direction: | positive                                              |
| Pub. 1 title:      | Impacts of climate and vegetation change on carbon... |
| Pub. 1 authors:    | Nichols, Jonathan E; Peteet, Dorothy M; Moy, Chris... |
| Pub. 1 year:       | 2014                                                  |
| Pub. 1 DOI:        | 10.1177/0959683614540729                              |
| Original data URL: | www.ncdc.noaa.gov/paleo/study/15444                   |

Proxy data and metadata

Peat | pollen | LowderCreekBog.Anderson.1999 | WEB20882fd8

Proxy time series: Pinus/Artemisia

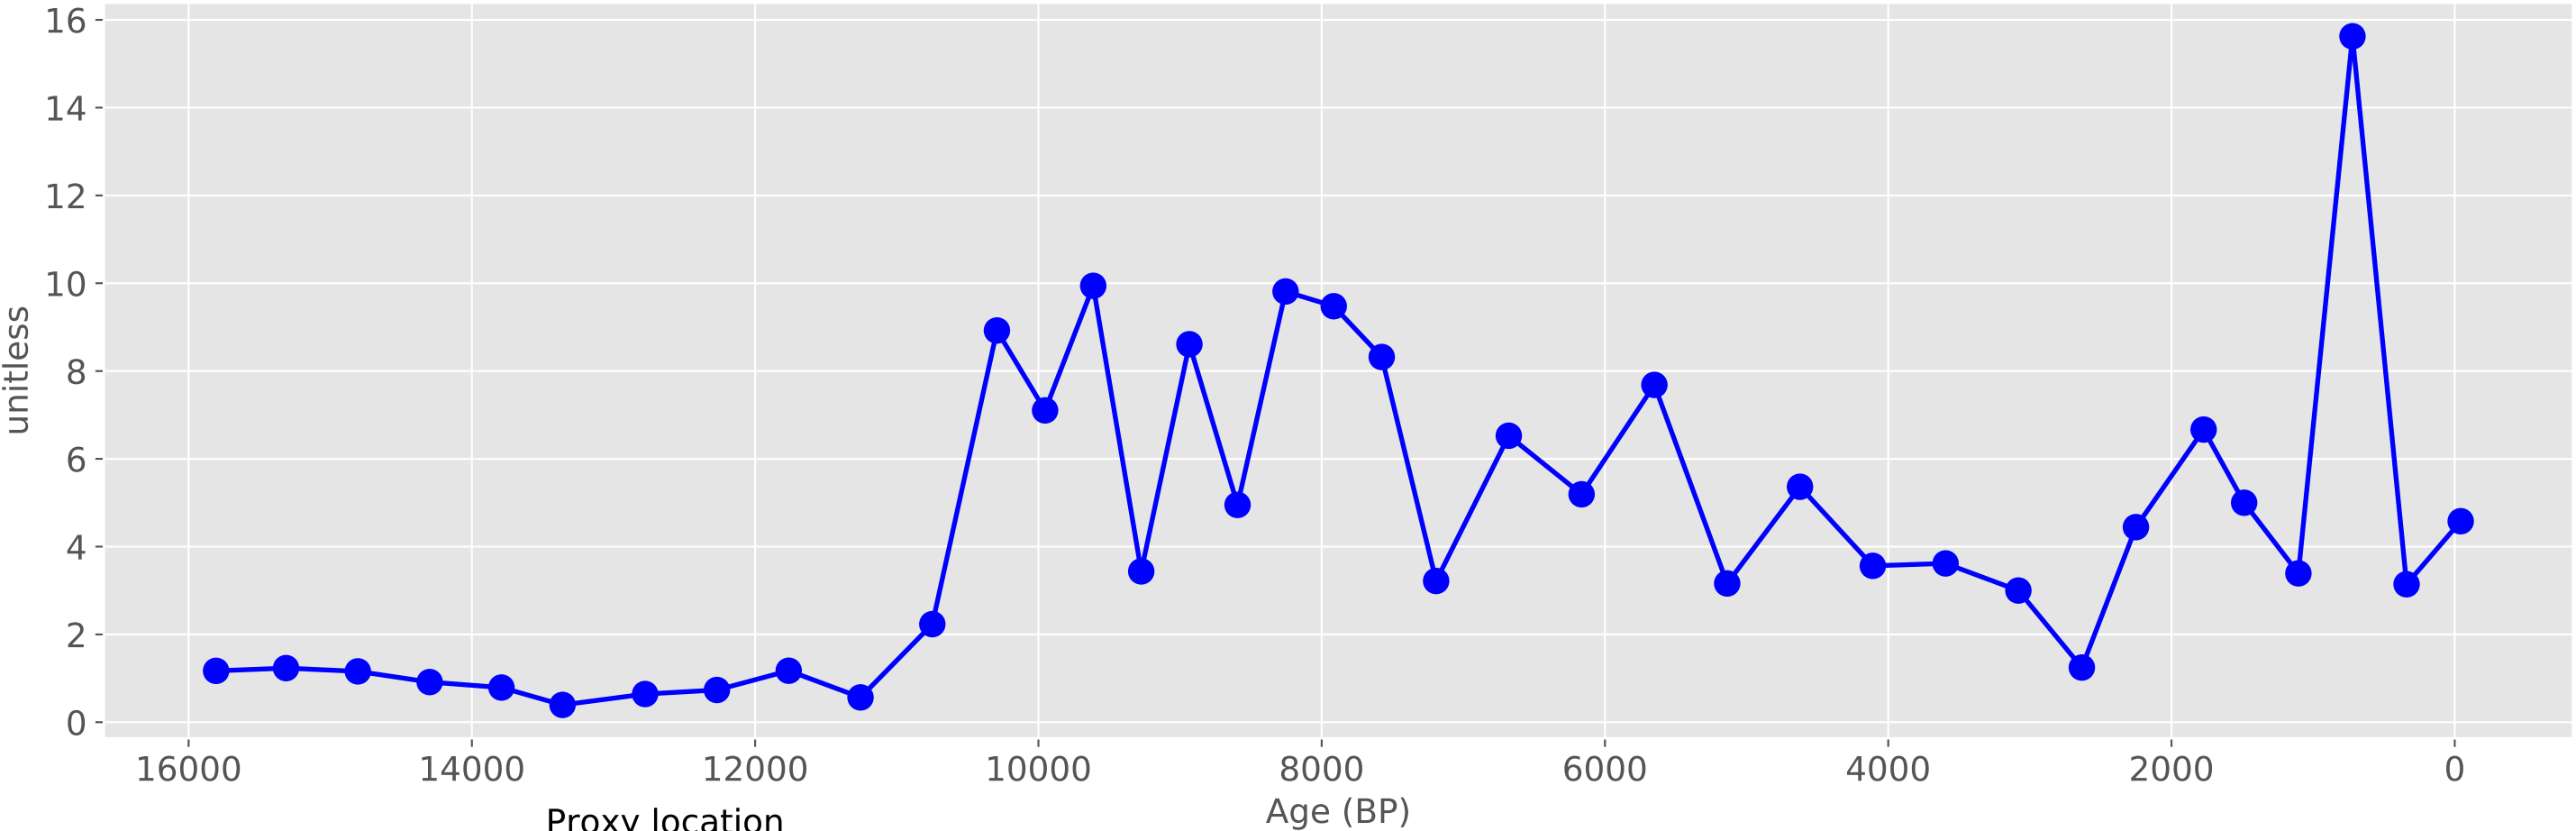

Proxy location  
(37.66 ° N, 112.77 ° W)

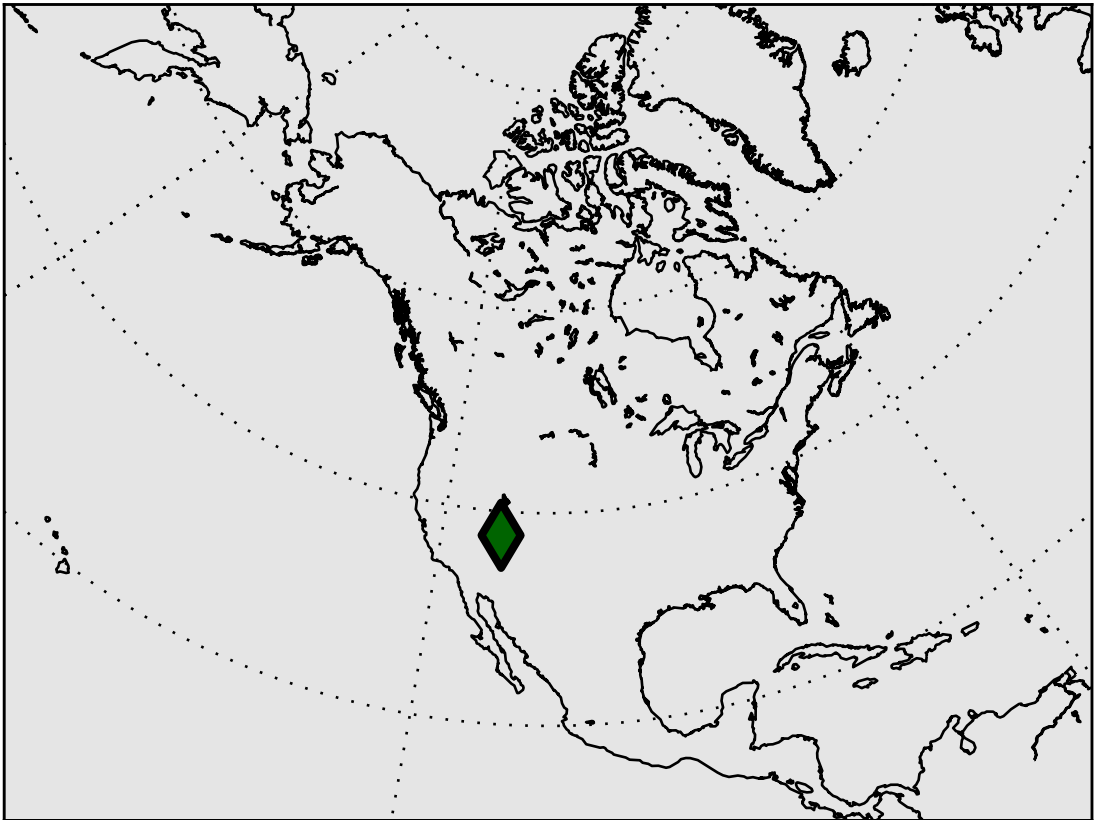

|                    |                                                       |
|--------------------|-------------------------------------------------------|
| Dataset name:      | LowderCreekBog.Anderson.1999                          |
| Archive type:      | Peat                                                  |
| Proxy type:        | pollen                                                |
| Variable name:     | Pinus/Artemisia                                       |
| Latitude ( ° N):   | 37.6644                                               |
| Longitude ( ° E):  | -112.7749                                             |
| Elevation (m):     | 3077.0                                                |
| Interp. variable:  | T                                                     |
| Interp. detail:    | air@surface                                           |
| Interp. season:    | annual                                                |
| Interp. direction: | positive                                              |
| Pub. 1 title:      | Late Wisconsin and Holocene Subalpine Forests of t... |
| Pub. 1 authors:    | Anderson, R. Scott;Hasbargen, Jim;Koehler, Peter A... |
| Pub. 1 year:       | 1999                                                  |
| Pub. 1 DOI:        | 10.1080/15230430.1999.12003321                        |
| Original data URL: | wNA                                                   |

Proxy data and metadata

Peat | pollen | LowderCreekBog.Anderson.1999 | WEB506ba549

Proxy time series: Pinyon

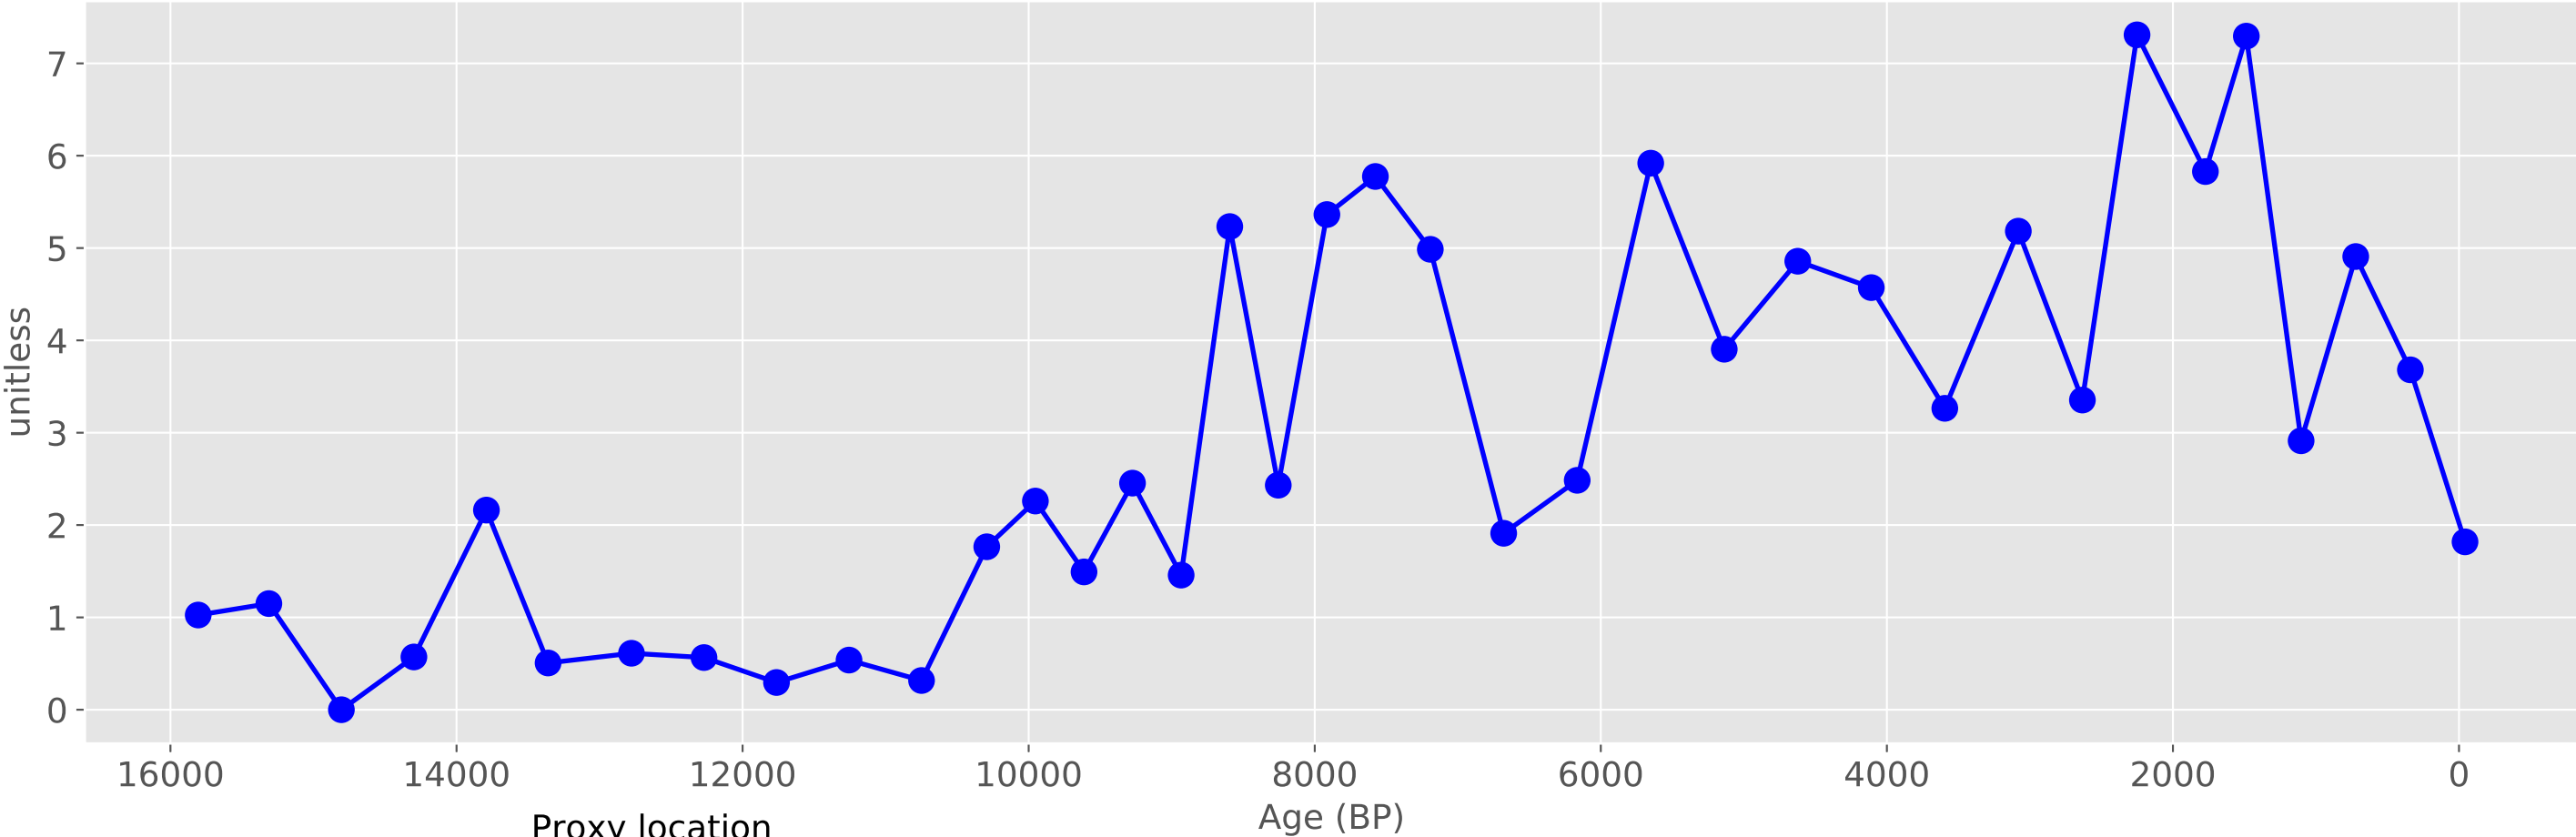

Proxy location  
(37.66 ° N, 112.77 ° W)

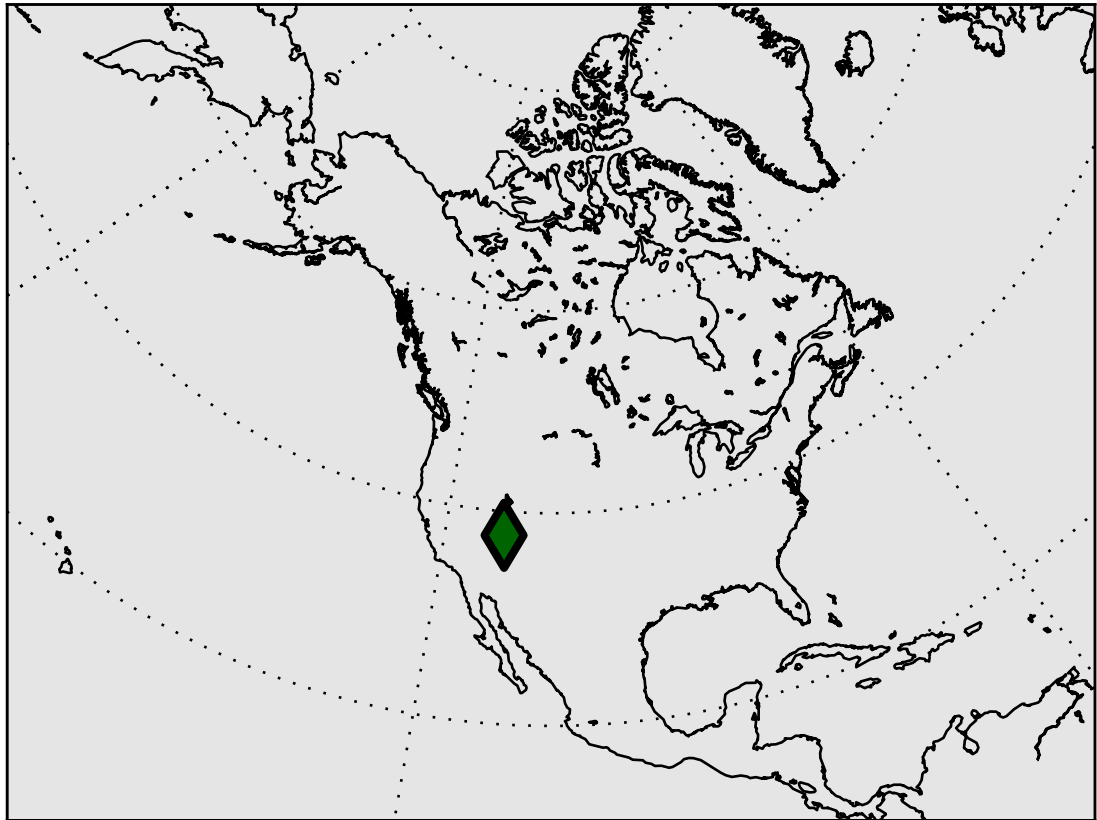

|                    |                                                       |
|--------------------|-------------------------------------------------------|
| Dataset name:      | LowderCreekBog.Anderson.1999                          |
| Archive type:      | Peat                                                  |
| Proxy type:        | pollen                                                |
| Variable name:     | Pinyon                                                |
| Latitude ( ° N):   | 37.6644                                               |
| Longitude ( ° E):  | -112.7749                                             |
| Elevation (m):     | 3077.0                                                |
| Interp. variable:  | P-E                                                   |
| Interp. detail:    | @surface                                              |
| Interp. season:    | winterOnly                                            |
| Interp. direction: | positive                                              |
| Pub. 1 title:      | Late Wisconsin and Holocene Subalpine Forests of t... |
| Pub. 1 authors:    | Anderson, R. Scott;Hasbargen, Jim;Koehler, Peter A... |
| Pub. 1 year:       | 1999                                                  |
| Pub. 1 DOI:        | 10.1080/15230430.1999.12003321                        |
| Original data URL: | wNA                                                   |

Proxy data and metadata

Peat | pollen | LowderCreekBog.Anderson.1999 | WEB92e46c56

Proxy time series: Picea/Pinus

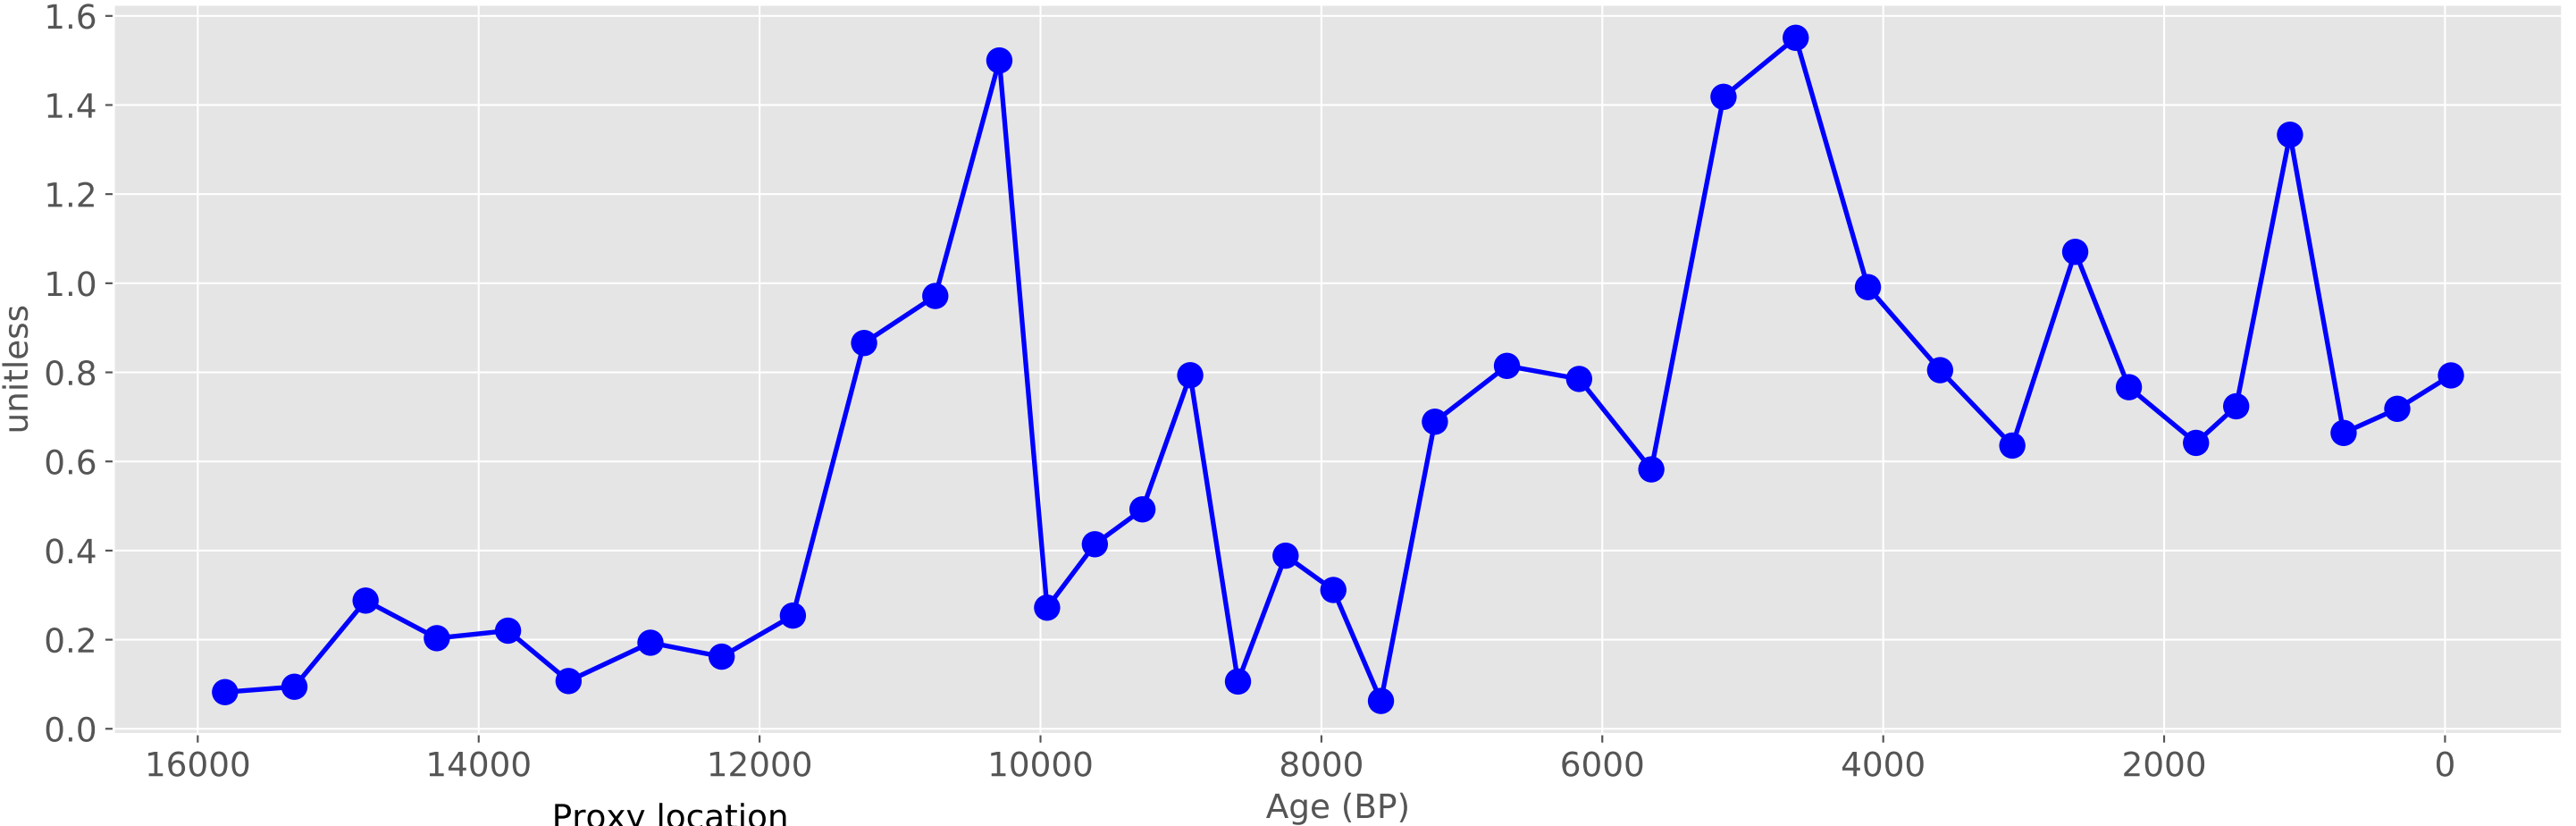

Proxy location  
(37.66 ° N, 112.77 ° W)



|                    |                                                       |
|--------------------|-------------------------------------------------------|
| Dataset name:      | LowderCreekBog.Anderson.1999                          |
| Archive type:      | Peat                                                  |
| Proxy type:        | pollen                                                |
| Variable name:     | Picea/Pinus                                           |
| Latitude ( ° N):   | 37.6644                                               |
| Longitude ( ° E):  | -112.7749                                             |
| Elevation (m):     | 3077.0                                                |
| Interp. variable:  | T                                                     |
| Interp. detail:    | air@surface                                           |
| Interp. season:    | annual                                                |
| Interp. direction: | positive                                              |
| Pub. 1 title:      | Late Wisconsin and Holocene Subalpine Forests of t... |
| Pub. 1 authors:    | Anderson, R. Scott;Hasbargen, Jim;Koehler, Peter A... |
| Pub. 1 year:       | 1999                                                  |
| Pub. 1 DOI:        | 10.1080/15230430.1999.12003321                        |
| Original data URL: | wNA                                                   |

Proxy data and metadata

Peat | pollen | LowderCreekBog.Anderson.1999 | WEBb66f8da4

Proxy time series: Picea/Artemisia

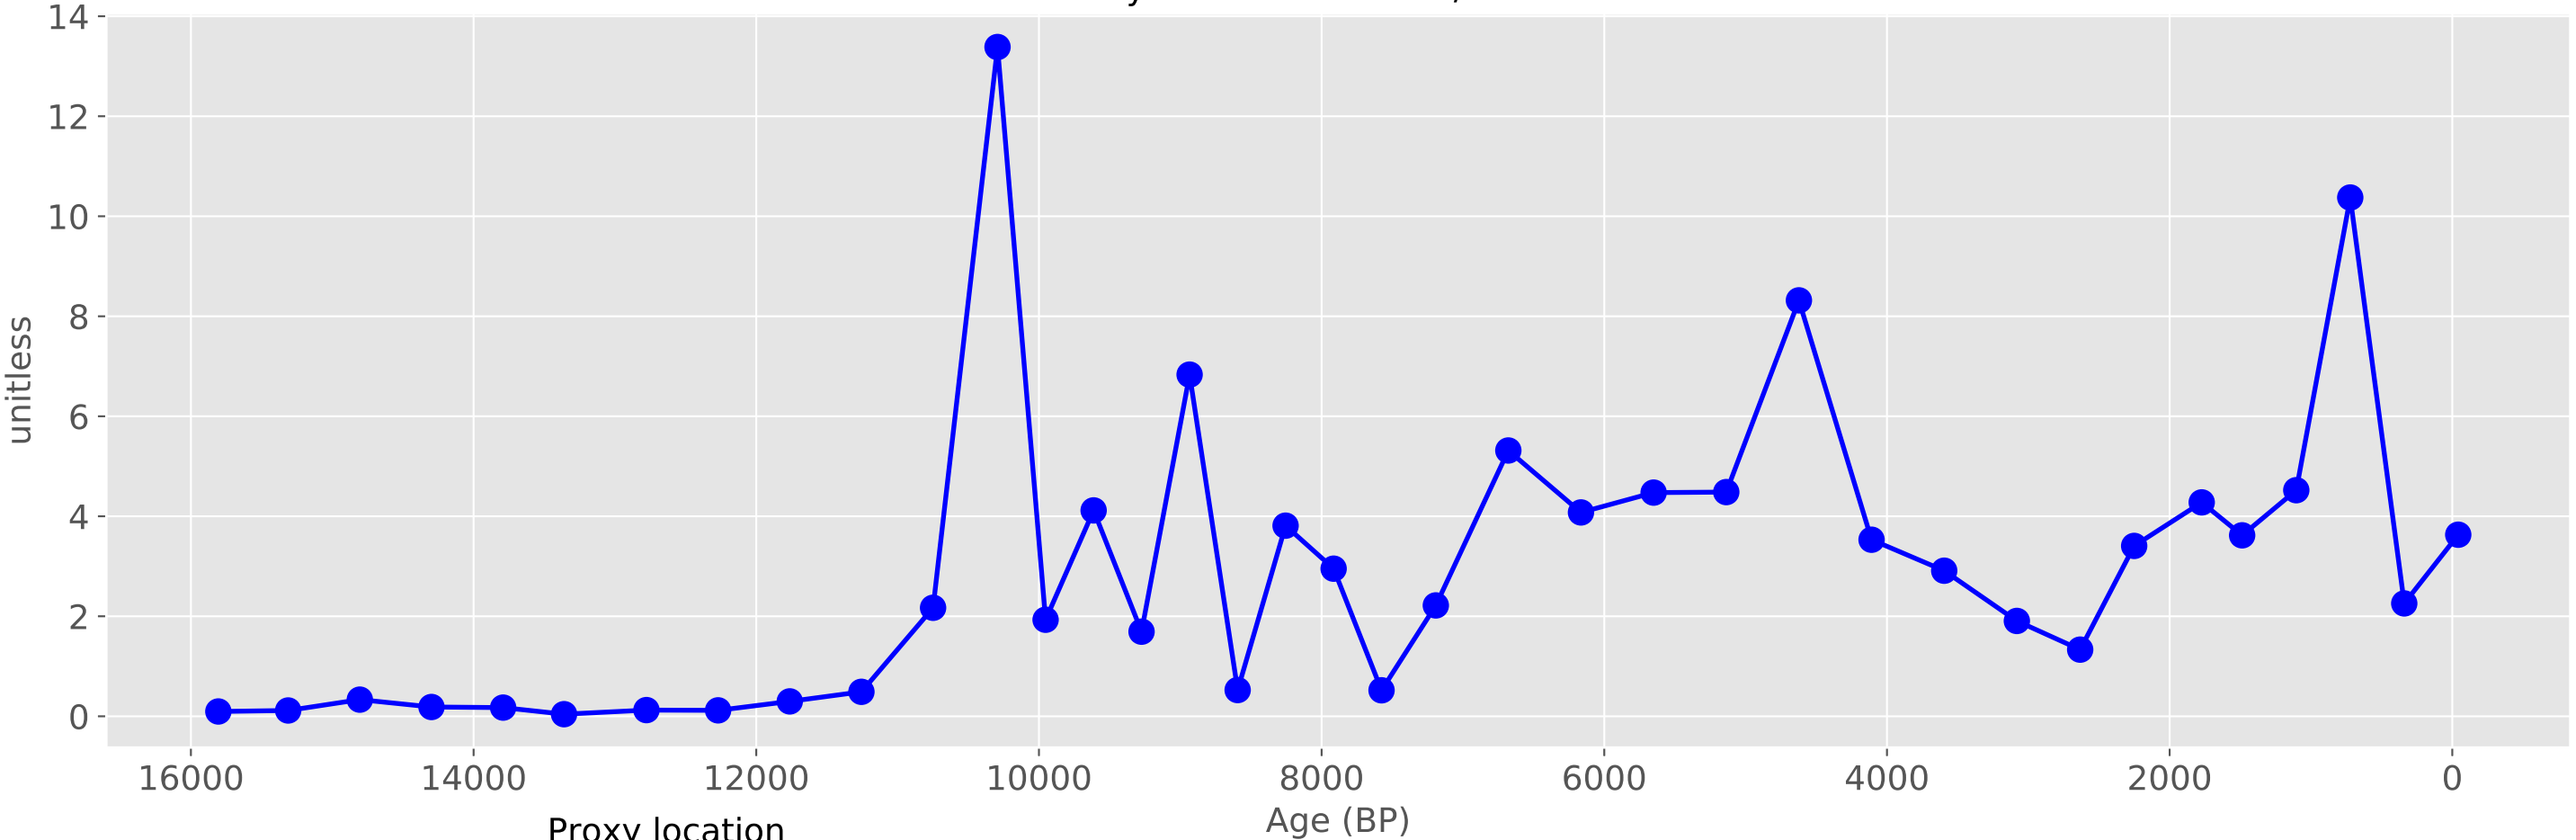

Proxy location  
(37.66 ° N, 112.77 ° W)



|                    |                                                       |
|--------------------|-------------------------------------------------------|
| Dataset name:      | LowderCreekBog.Anderson.1999                          |
| Archive type:      | Peat                                                  |
| Proxy type:        | pollen                                                |
| Variable name:     | Picea/Artemisia                                       |
| Latitude ( ° N):   | 37.6644                                               |
| Longitude ( ° E):  | -112.7749                                             |
| Elevation (m):     | 3077.0                                                |
| Interp. variable:  | T                                                     |
| Interp. detail:    | air@surface                                           |
| Interp. season:    | annual                                                |
| Interp. direction: | positive                                              |
| Pub. 1 title:      | Late Wisconsin and Holocene Subalpine Forests of t... |
| Pub. 1 authors:    | Anderson, R. Scott;Hasbargen, Jim;Koehler, Peter A... |
| Pub. 1 year:       | 1999                                                  |
| Pub. 1 DOI:        | 10.1080/15230430.1999.12003321                        |
| Original data URL: | wNA                                                   |

Proxy data and metadata

Peat | pollen | ChihuahuenosBog.Anderson.2008 | WEB3f3a069d

Proxy time series: Picea/Artemesia

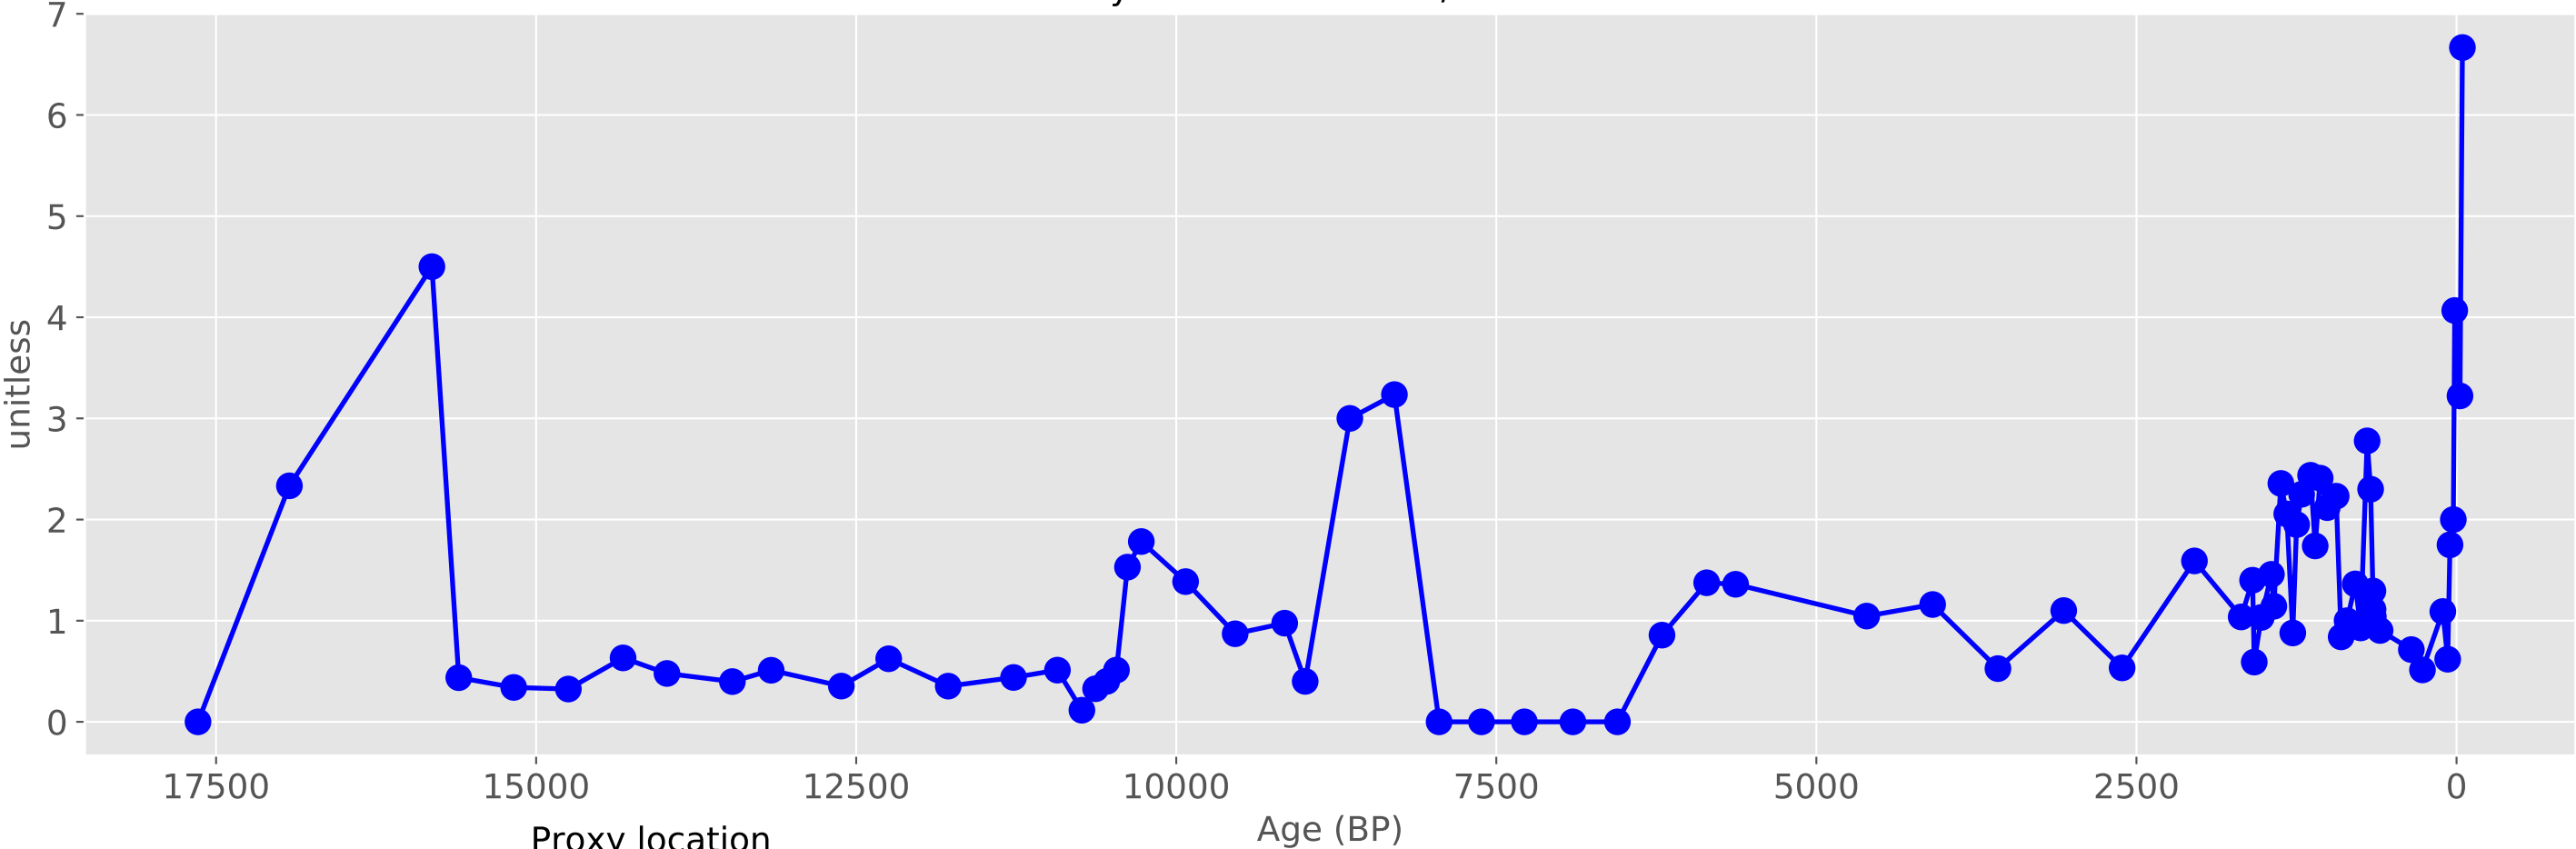

Proxy location  
(36.05 ° N, 106.51 ° W)

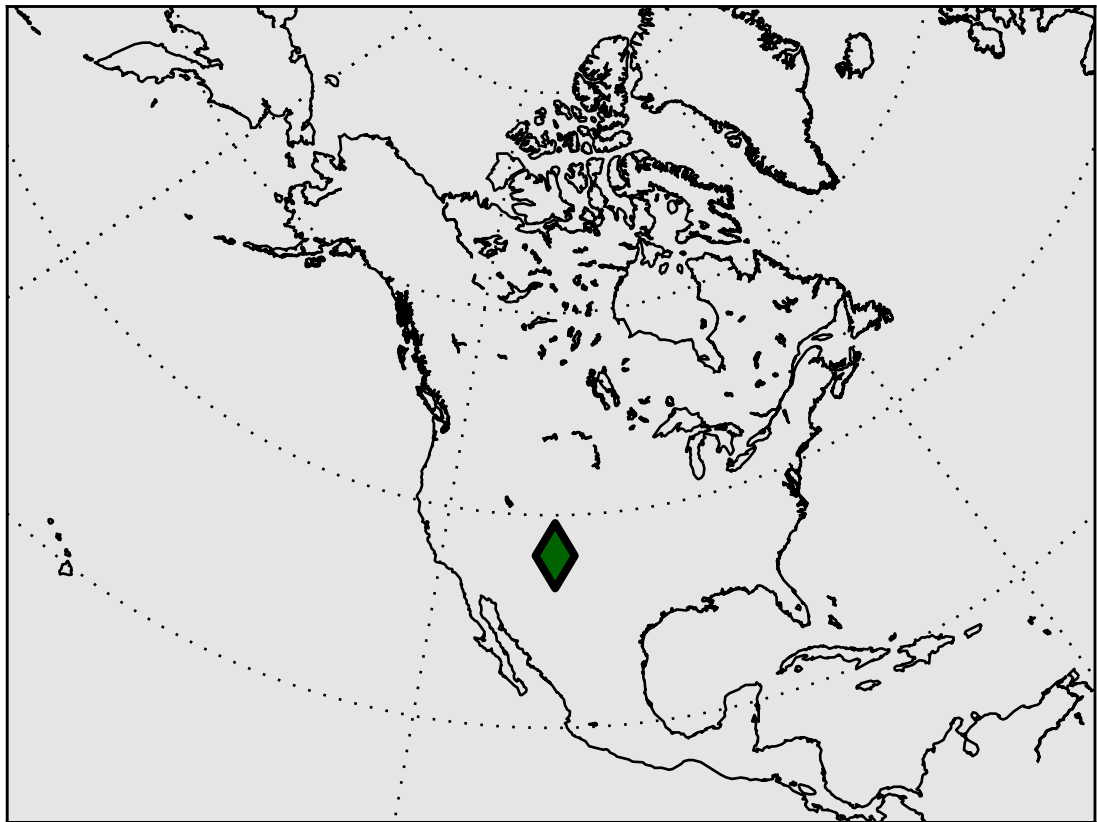

|                    |                                                       |
|--------------------|-------------------------------------------------------|
| Dataset name:      | ChihuahuenosBog.Anderson.2008                         |
| Archive type:      | Peat                                                  |
| Proxy type:        | pollen                                                |
| Variable name:     | Picea/Artemesia                                       |
| Latitude ( ° N):   | 36.0475                                               |
| Longitude ( ° E):  | -106.51                                               |
| Elevation (m):     | 2925.0                                                |
| Interp. variable:  | T                                                     |
| Interp. detail:    | air@surface                                           |
| Interp. season:    | annual                                                |
| Interp. direction: | positive                                              |
| Pub. 1 title:      | Development of the mixed conifer forest in norther... |
| Pub. 1 authors:    | Anderson, R. Scott;Jass, Renata B.;Toney, Jaime L.... |
| Pub. 1 year:       | 2008                                                  |
| Pub. 1 DOI:        | 10.1016/j.yqres.2007.12.002                           |
| Original data URL: | wNAm                                                  |



Proxy data and metadata

Peat | pollen | ChihuahuenosBog.Anderson.2008 | WEB742b158d

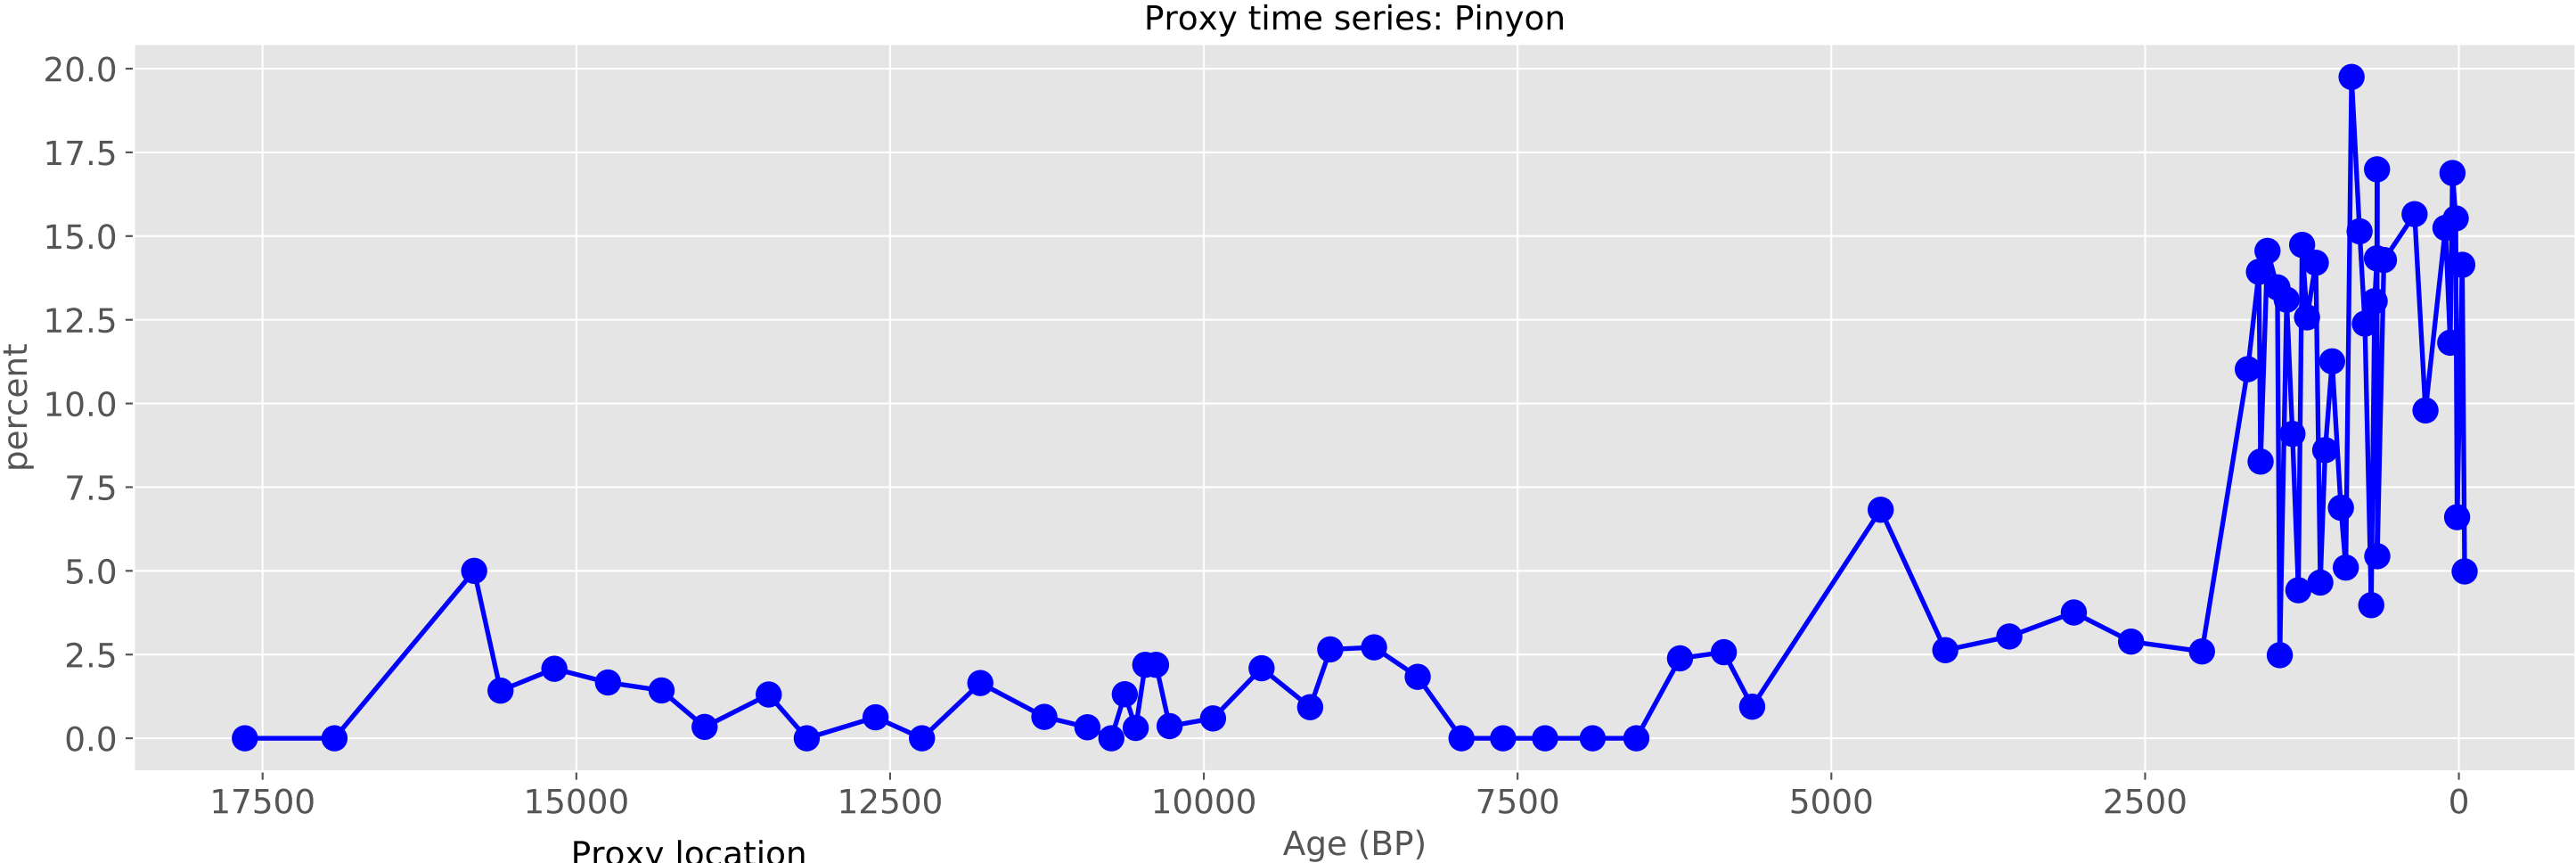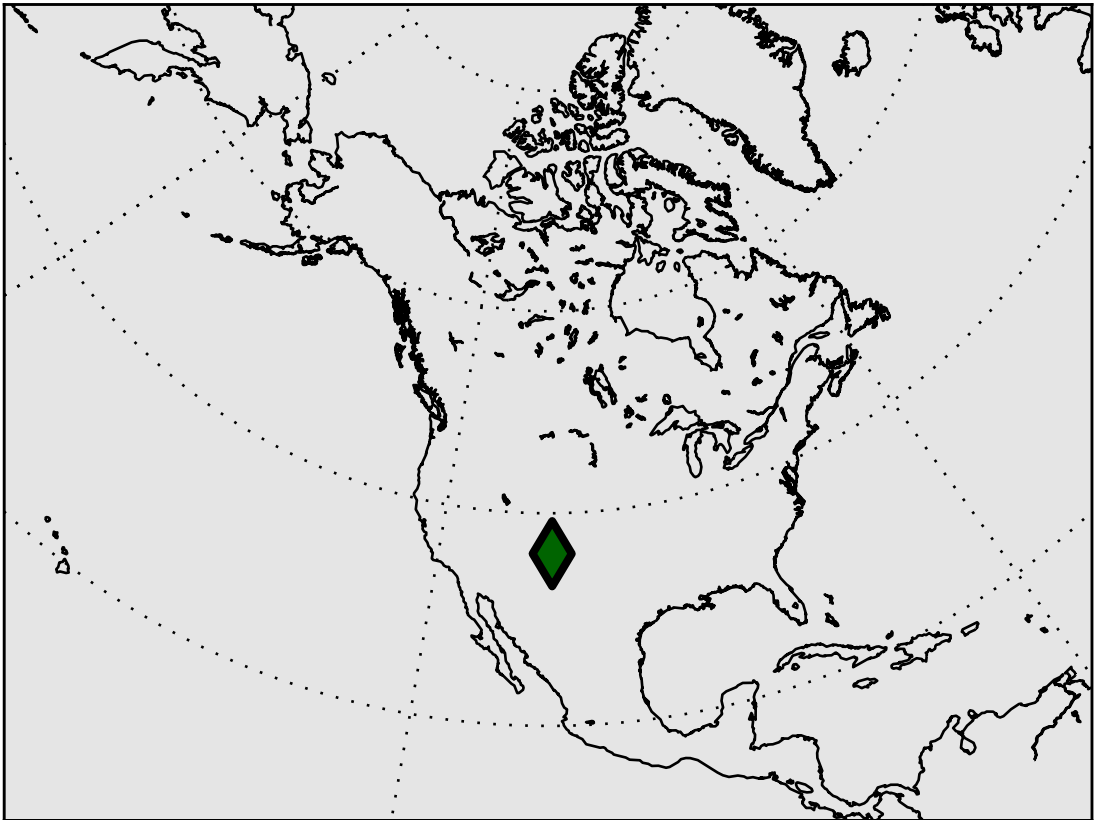

|                    |                                                       |
|--------------------|-------------------------------------------------------|
| Dataset name:      | ChihuahuenosBog.Anderson.2008                         |
| Archive type:      | Peat                                                  |
| Proxy type:        | pollen                                                |
| Variable name:     | Pinyon                                                |
| Latitude ( ° N):   | 36.0475                                               |
| Longitude ( ° E):  | -106.51                                               |
| Elevation (m):     | 2925.0                                                |
| Interp. variable:  | P-E                                                   |
| Interp. detail:    | @surface                                              |
| Interp. season:    | winterOnly                                            |
| Interp. direction: | positive                                              |
| Pub. 1 title:      | Development of the mixed conifer forest in norther... |
| Pub. 1 authors:    | Anderson, R. Scott;Jass, Renata B.;Toney, Jaime L.... |
| Pub. 1 year:       | 2008                                                  |
| Pub. 1 DOI:        | 10.1016/j.yqres.2007.12.002                           |
| Original data URL: | wNAm                                                  |

Proxy data and metadata

Peat | pollen | ChihuahuenosBog.Anderson.2008 | WEB815b74f3

Proxy time series: Picea/Pinus

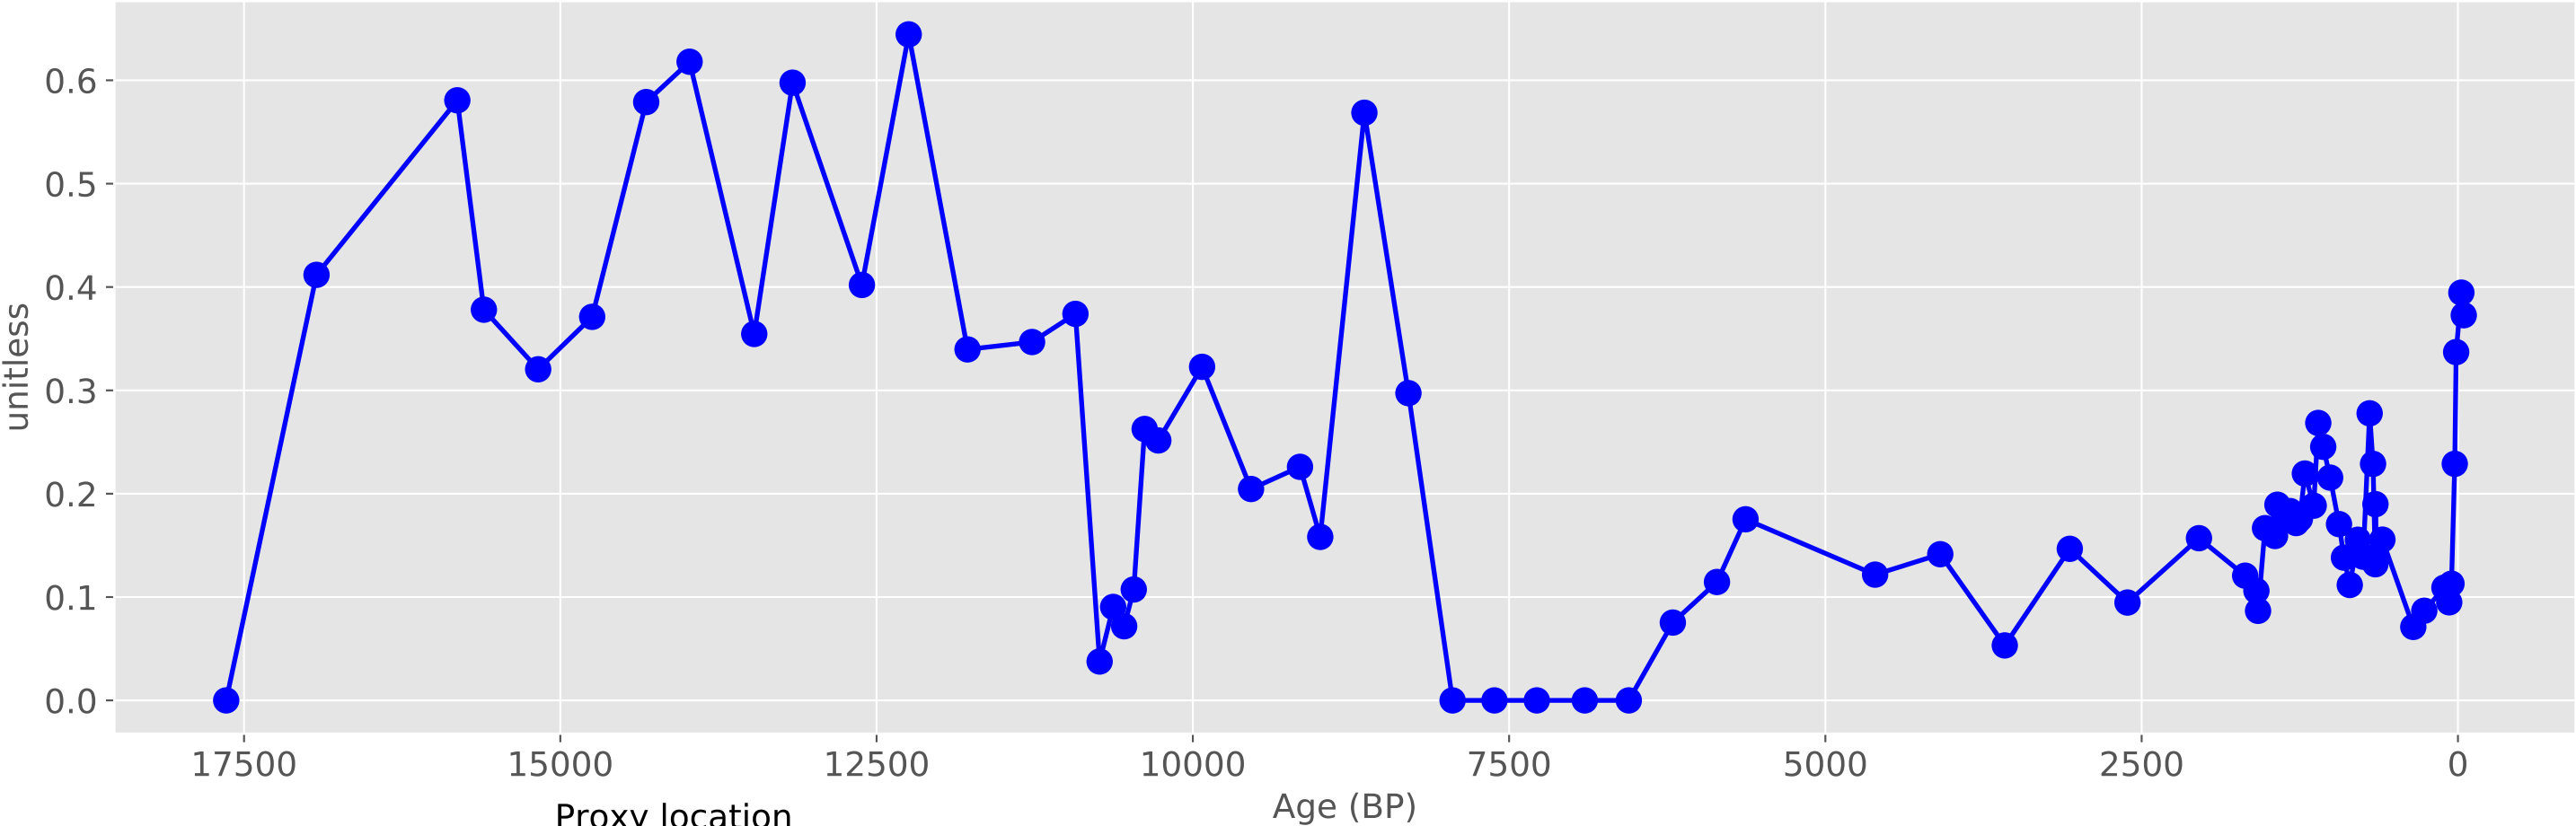

Proxy location  
(36.05 ° N, 106.51 ° W)

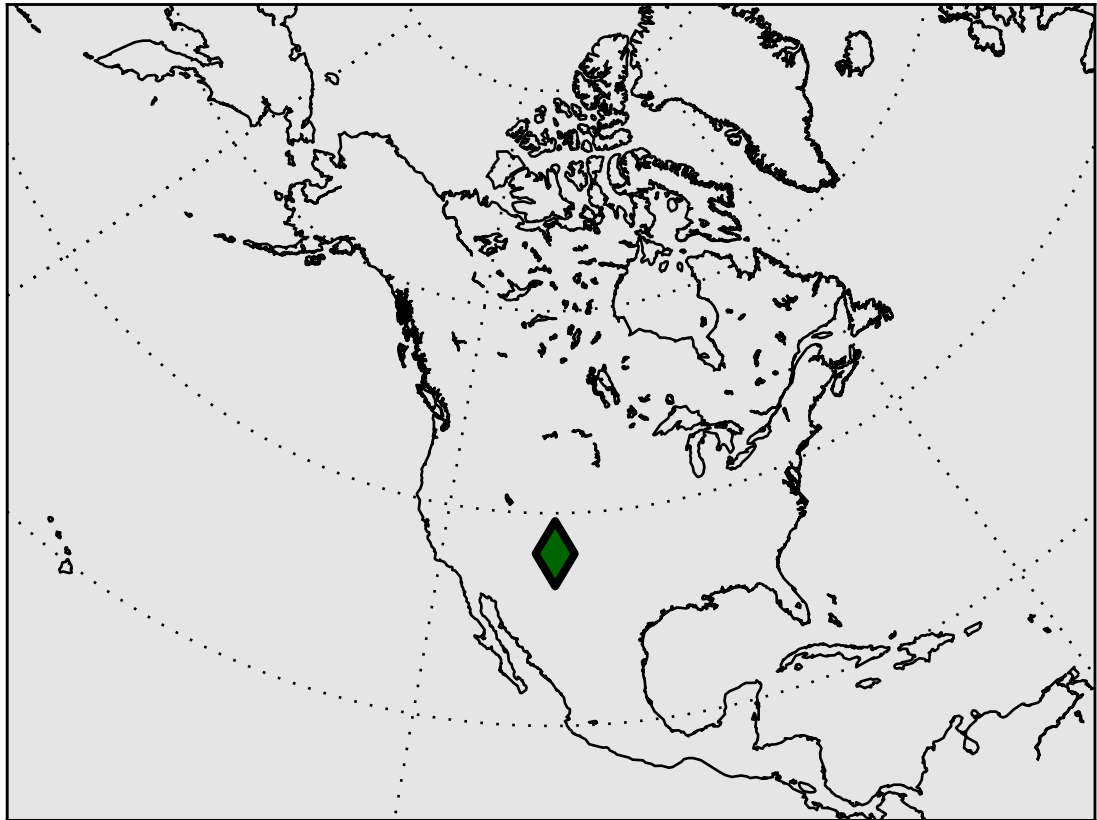

|                    |                                                       |
|--------------------|-------------------------------------------------------|
| Dataset name:      | ChihuahuenosBog.Anderson.2008                         |
| Archive type:      | Peat                                                  |
| Proxy type:        | pollen                                                |
| Variable name:     | Picea/Pinus                                           |
| Latitude ( ° N):   | 36.0475                                               |
| Longitude ( ° E):  | -106.51                                               |
| Elevation (m):     | 2925.0                                                |
| Interp. variable:  | T                                                     |
| Interp. detail:    | air@surface                                           |
| Interp. season:    | annual                                                |
| Interp. direction: | positive                                              |
| Pub. 1 title:      | Development of the mixed conifer forest in norther... |
| Pub. 1 authors:    | Anderson, R. Scott;Jass, Renata B.;Toney, Jaime L.... |
| Pub. 1 year:       | 2008                                                  |
| Pub. 1 DOI:        | 10.1016/j.yqres.2007.12.002                           |
| Original data URL: | wNAm                                                  |

Proxy data and metadata  
**Peat | pollen | ChihuahuenosBog.Anderson.2008 | WEB975906fe**

Proxy time series: Pinus/Artemesia

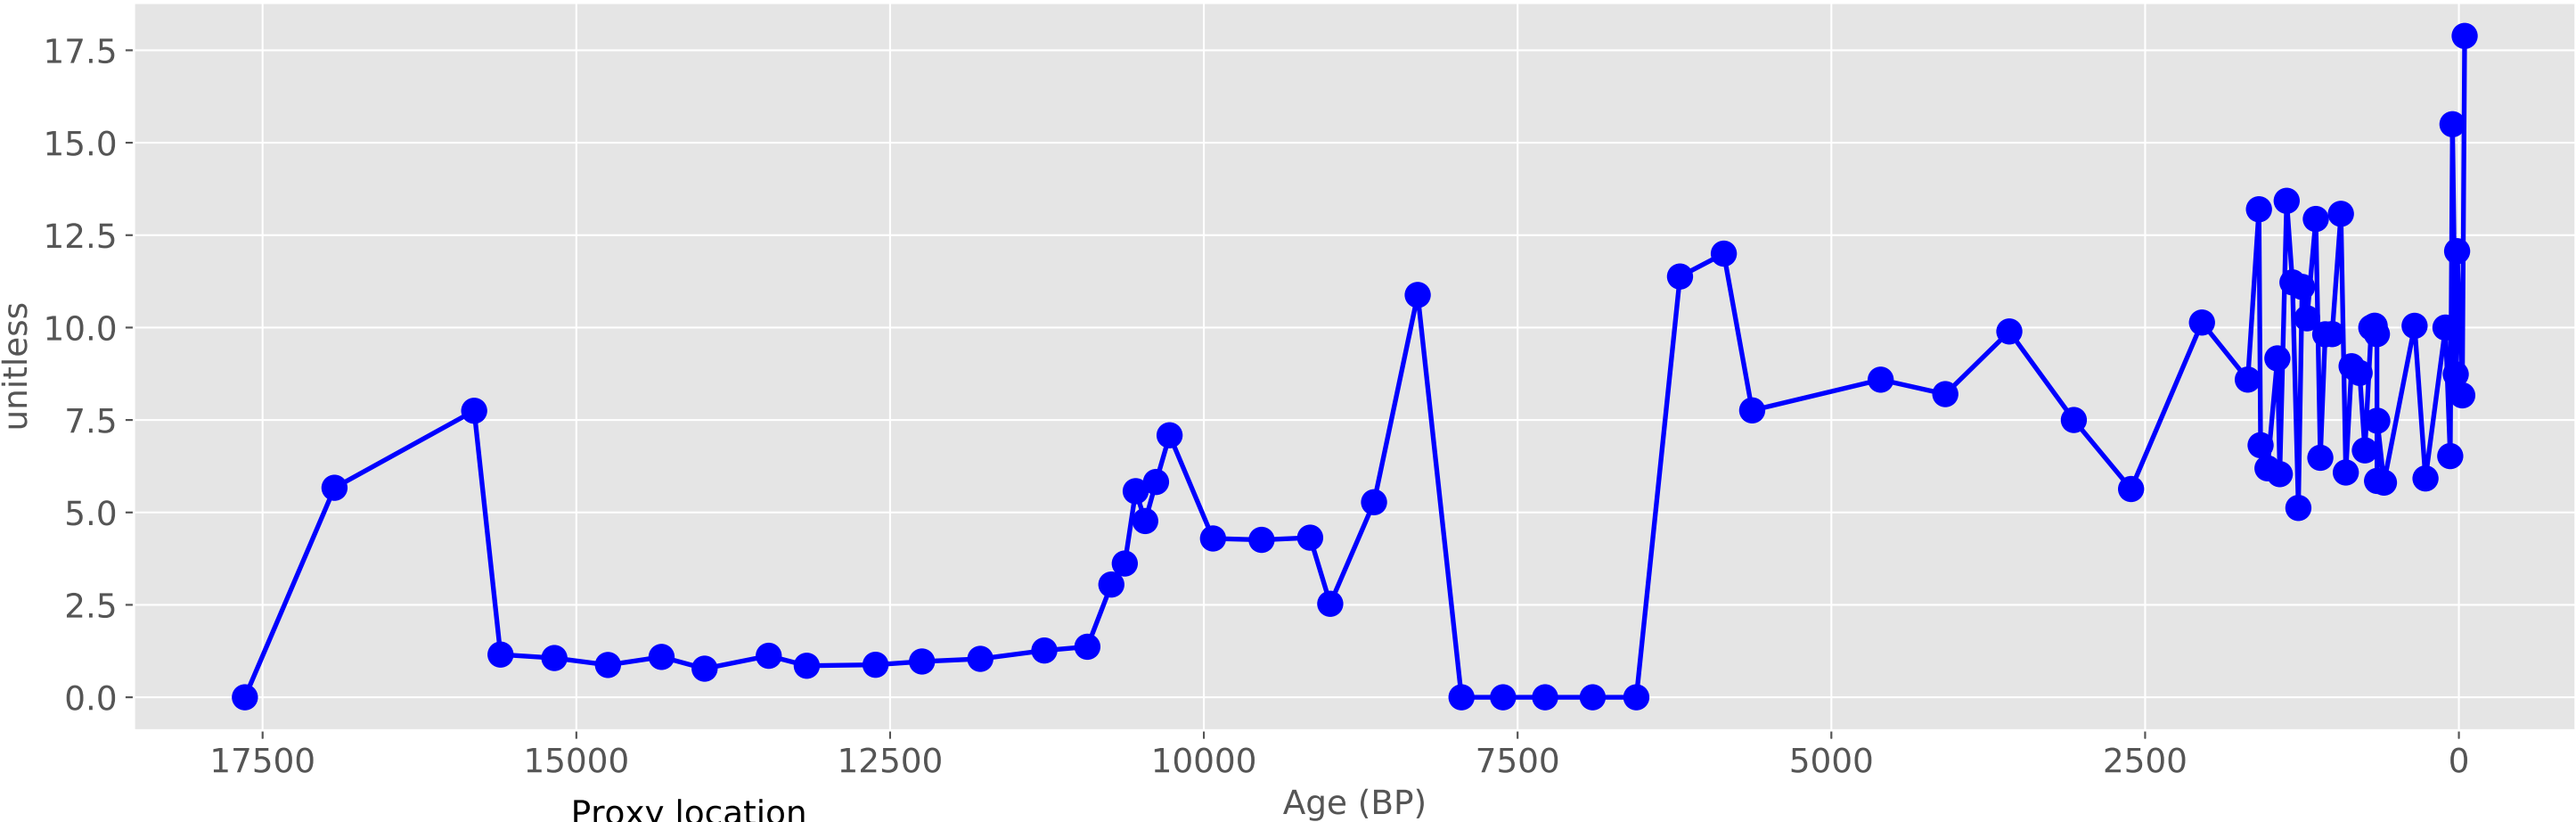

Proxy location  
(36.05 ° N, 106.51 ° W)



|                    |                                                       |
|--------------------|-------------------------------------------------------|
| Dataset name:      | ChihuahuenosBog.Anderson.2008                         |
| Archive type:      | Peat                                                  |
| Proxy type:        | pollen                                                |
| Variable name:     | Pinus/Artemesia                                       |
| Latitude ( ° N):   | 36.0475                                               |
| Longitude ( ° E):  | -106.51                                               |
| Elevation (m):     | 2925.0                                                |
| Interp. variable:  | T                                                     |
| Interp. detail:    | air@surface                                           |
| Interp. season:    | annual                                                |
| Interp. direction: | positive                                              |
| Pub. 1 title:      | Development of the mixed conifer forest in norther... |
| Pub. 1 authors:    | Anderson, R. Scott;Jass, Renata B.;Toney, Jaime L.... |
| Pub. 1 year:       | 2008                                                  |
| Pub. 1 DOI:        | 10.1016/j.yqres.2007.12.002                           |
| Original data URL: | wNAm                                                  |

Proxy data and metadata  
Peat | pollen | StewartBog.Jimenez-Moreno.2008 | WEB26ef9aa2

Proxy time series: Pinyon

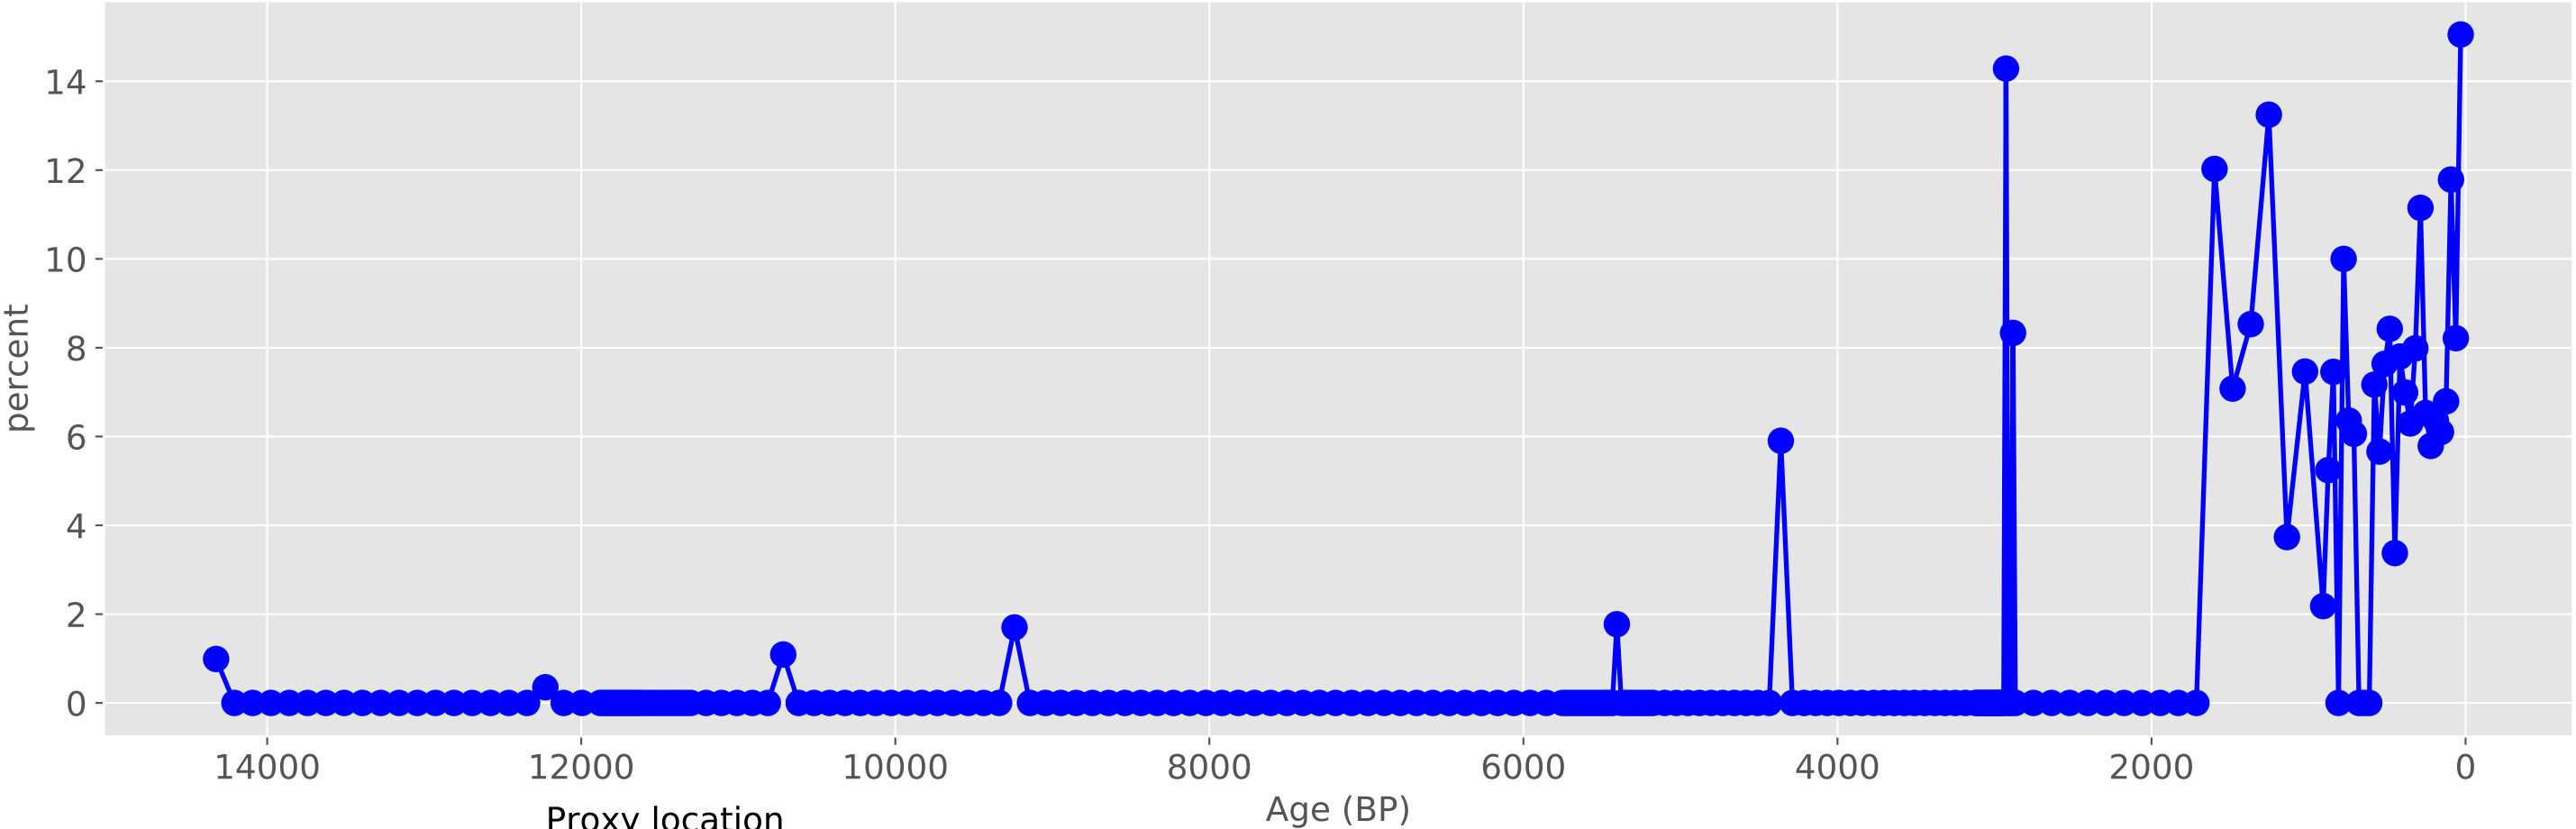

Proxy location  
(35.83 ° N, 105.72 ° W)

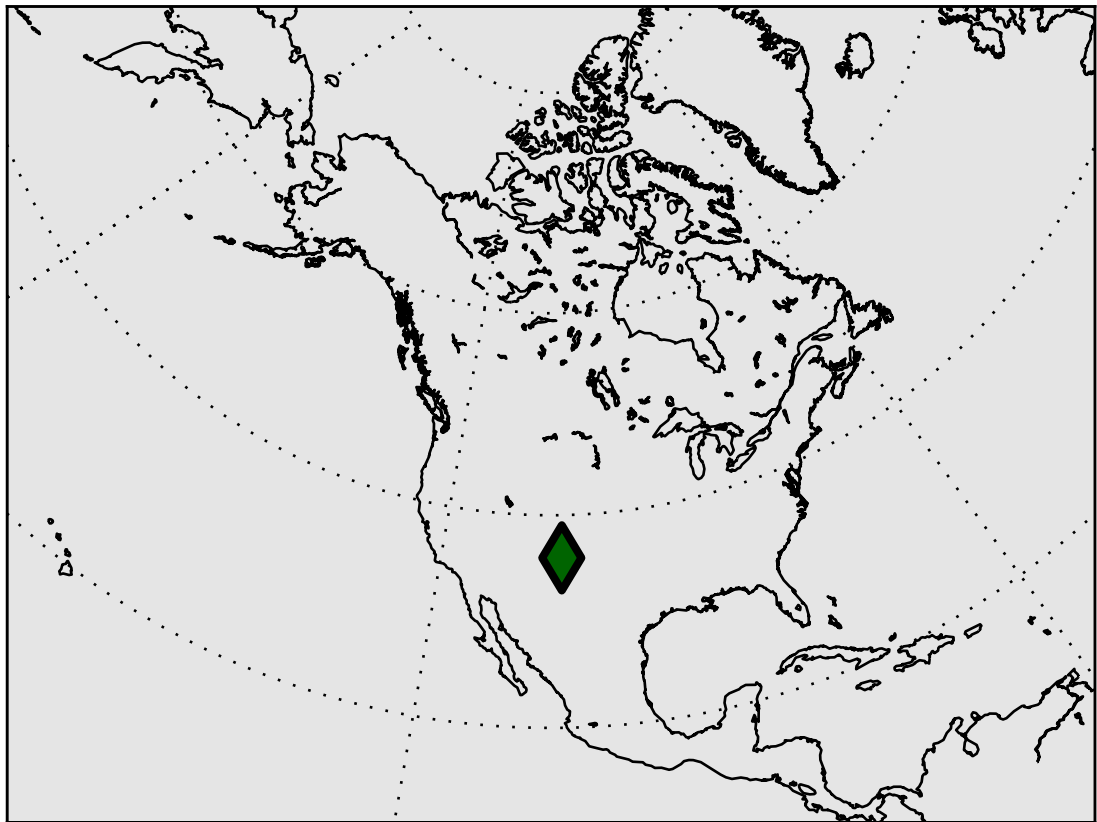

|                    |                                                       |
|--------------------|-------------------------------------------------------|
| Dataset name:      | StewartBog.Jimenez-Moreno.2008                        |
| Archive type:      | Peat                                                  |
| Proxy type:        | pollen                                                |
| Variable name:     | Pinyon                                                |
| Latitude ( ° N):   | 35.8323                                               |
| Longitude ( ° E):  | -105.7225                                             |
| Elevation (m):     | 3116.0                                                |
| Interp. variable:  | P-E                                                   |
| Interp. detail:    | @surface                                              |
| Interp. season:    | winterOnly                                            |
| Interp. direction: | positive                                              |
| Pub. 1 title:      | Millennial- and centennial-scale vegetation and cl... |
| Pub. 1 authors:    | Jiménez-Moreno, Gonzalo;Fawcett, Peter J.;Scott An... |
| Pub. 1 year:       | 2008                                                  |
| Pub. 1 DOI:        | 10.1016/j.quascirev.2008.04.004                       |
| Original data URL: | wNA                                                   |

Proxy data and metadata  
**Peat | pollen | StewartBog.Jimenez-Moreno.2008 | WEB59f13cd6**

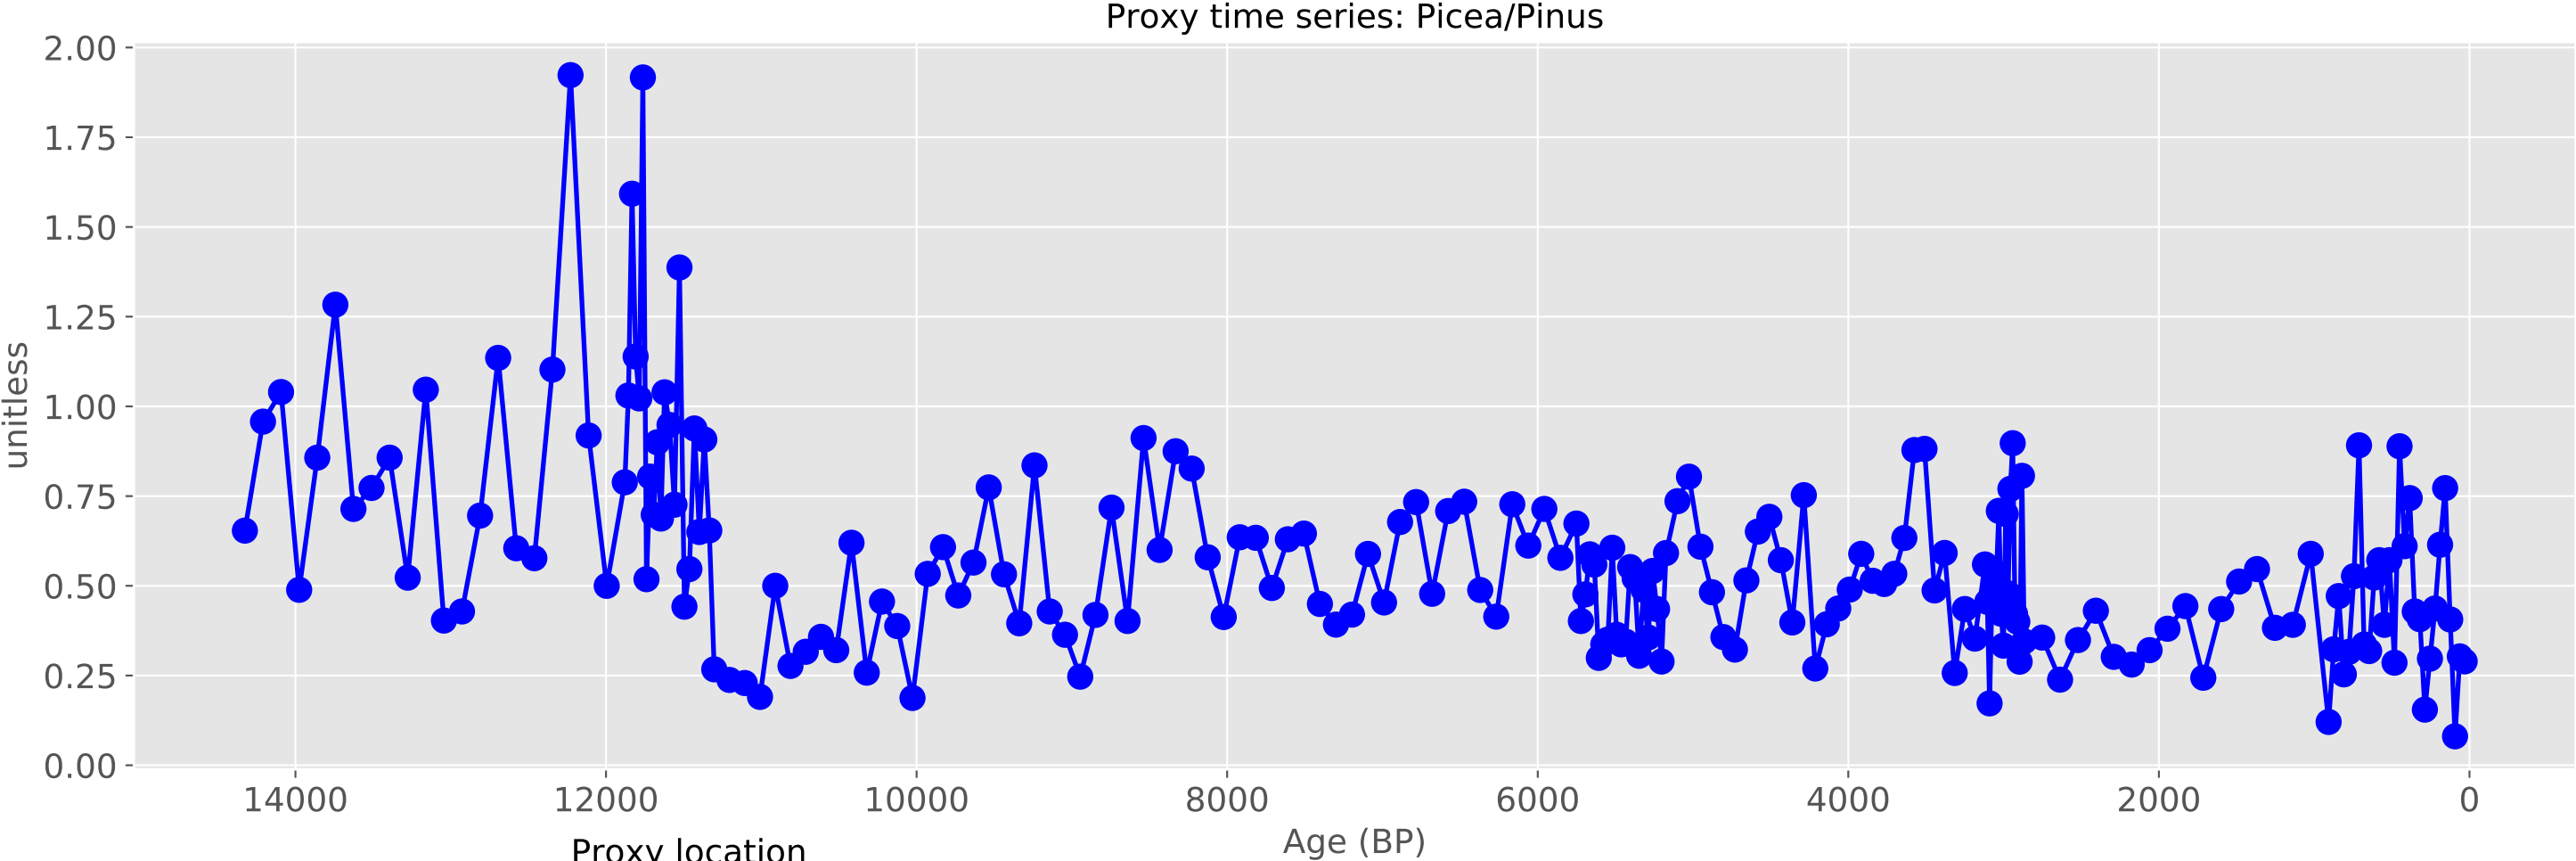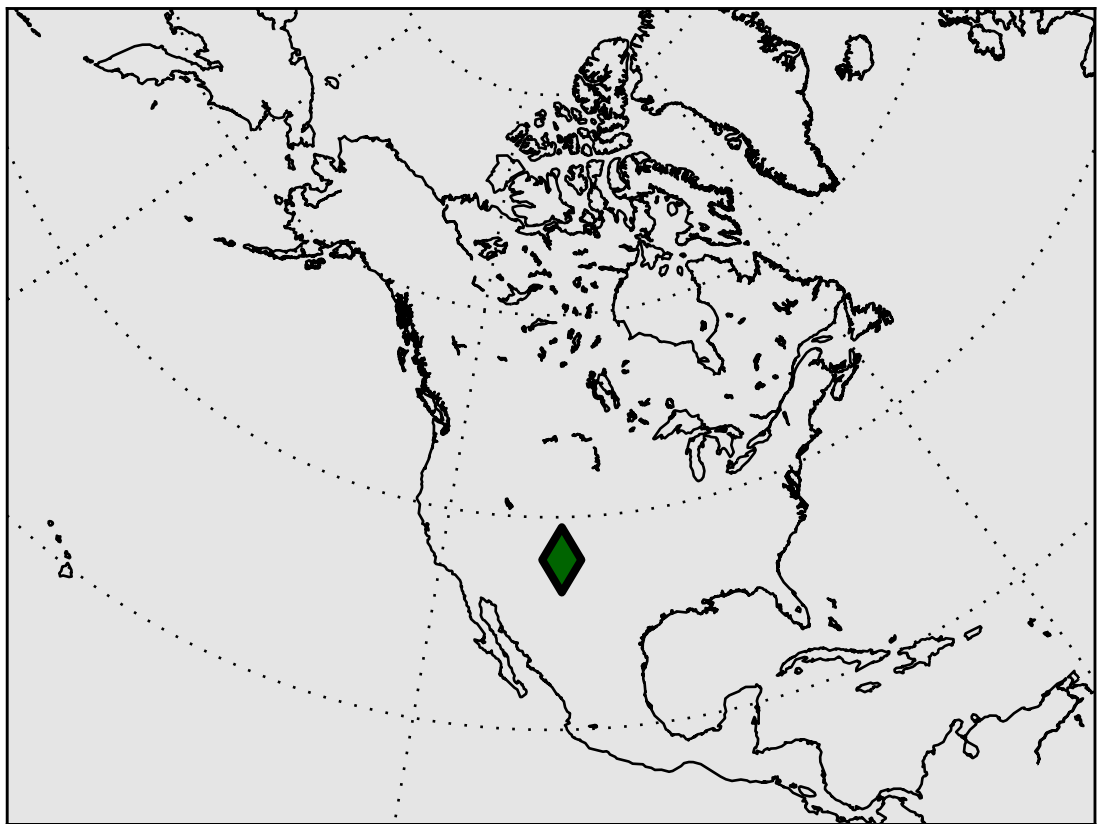

|                    |                                                       |
|--------------------|-------------------------------------------------------|
| Dataset name:      | StewartBog.Jimenez-Moreno.2008                        |
| Archive type:      | Peat                                                  |
| Proxy type:        | pollen                                                |
| Variable name:     | Picea/Pinus                                           |
| Latitude ( ° N):   | 35.8323                                               |
| Longitude ( ° E):  | -105.7225                                             |
| Elevation (m):     | 3116.0                                                |
| Interp. variable:  | T                                                     |
| Interp. detail:    | air@surface                                           |
| Interp. season:    | annual                                                |
| Interp. direction: | positive                                              |
| Pub. 1 title:      | Millennial- and centennial-scale vegetation and cl... |
| Pub. 1 authors:    | Jiménez-Moreno, Gonzalo;Fawcett, Peter J.;Scott An... |
| Pub. 1 year:       | 2008                                                  |
| Pub. 1 DOI:        | 10.1016/j.quascirev.2008.04.004                       |
| Original data URL: | wNAm                                                  |

Proxy data and metadata

Peat | pollen | StewartBog.Jimenez-Moreno.2008 | WEB931c9116

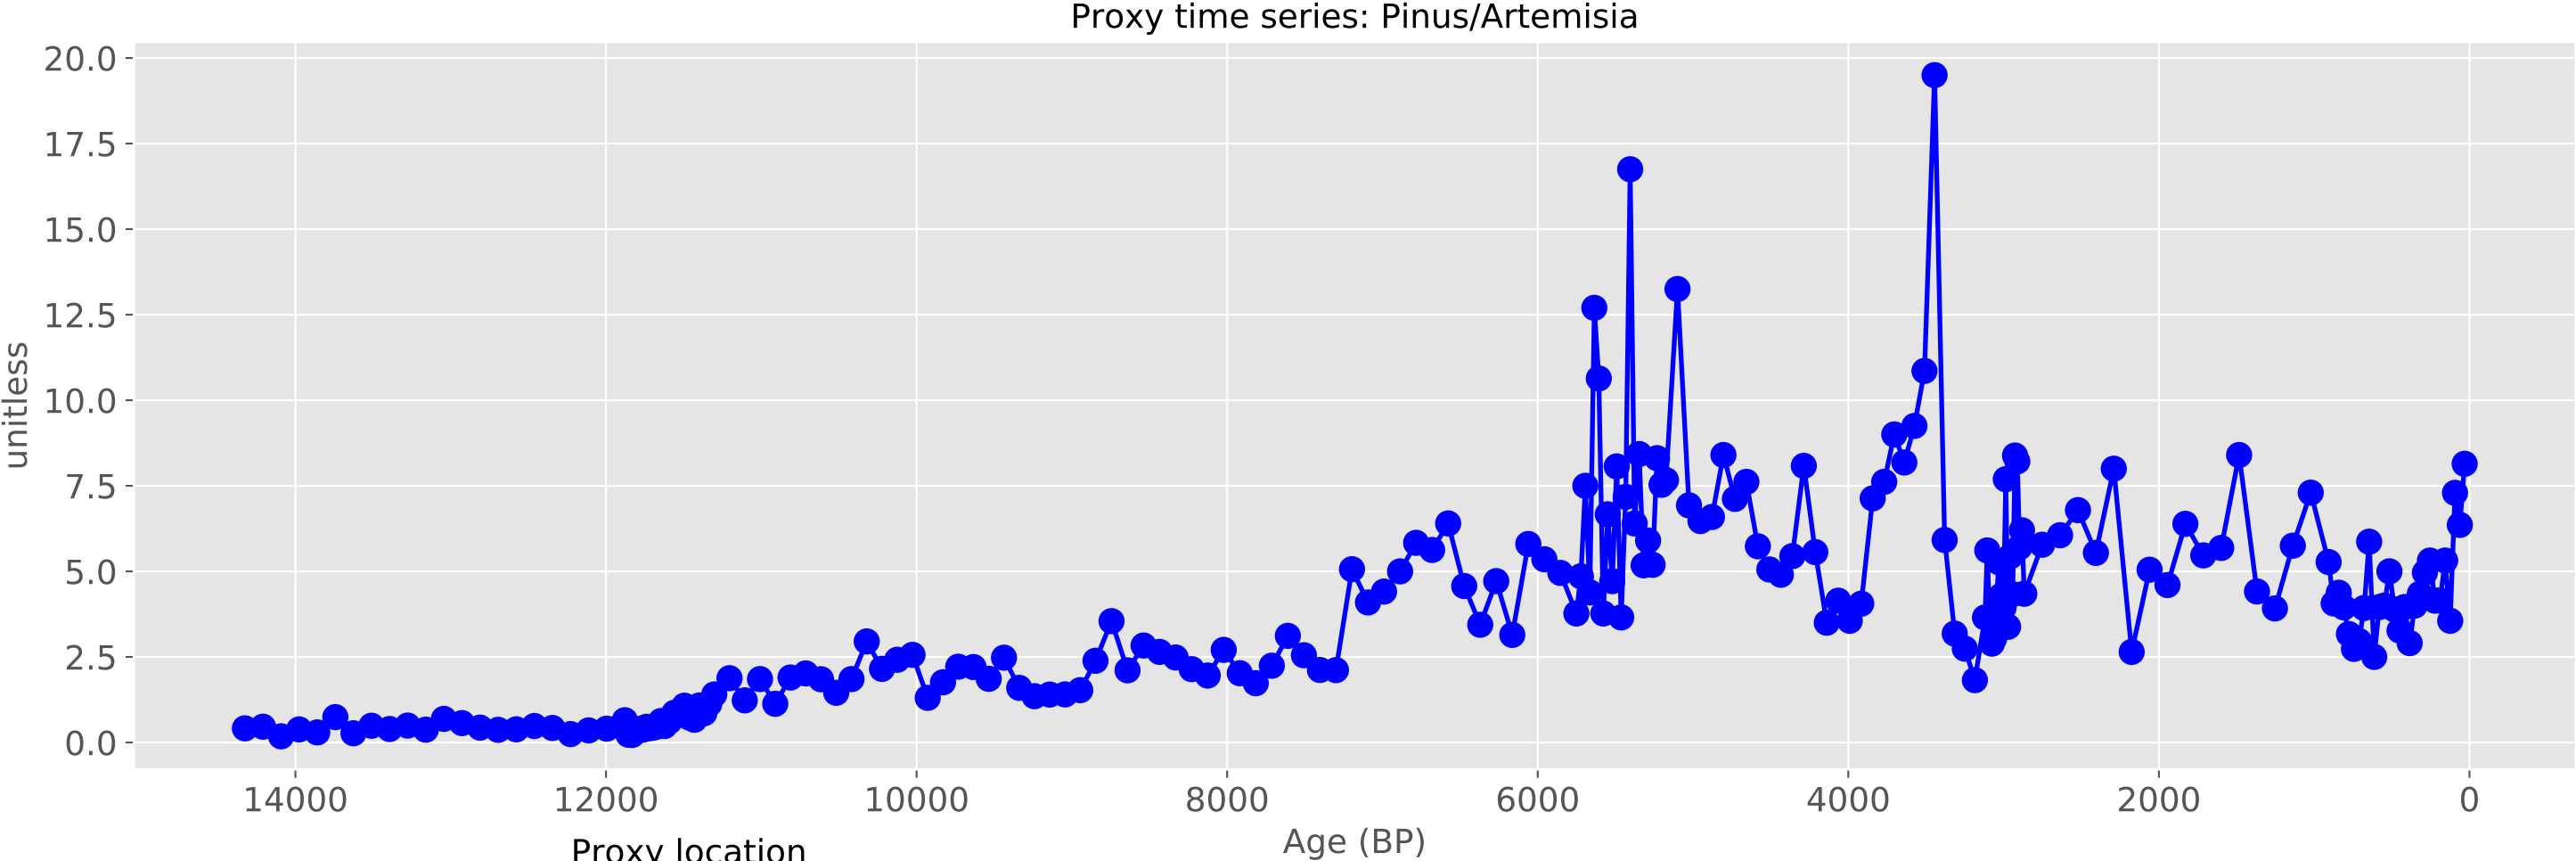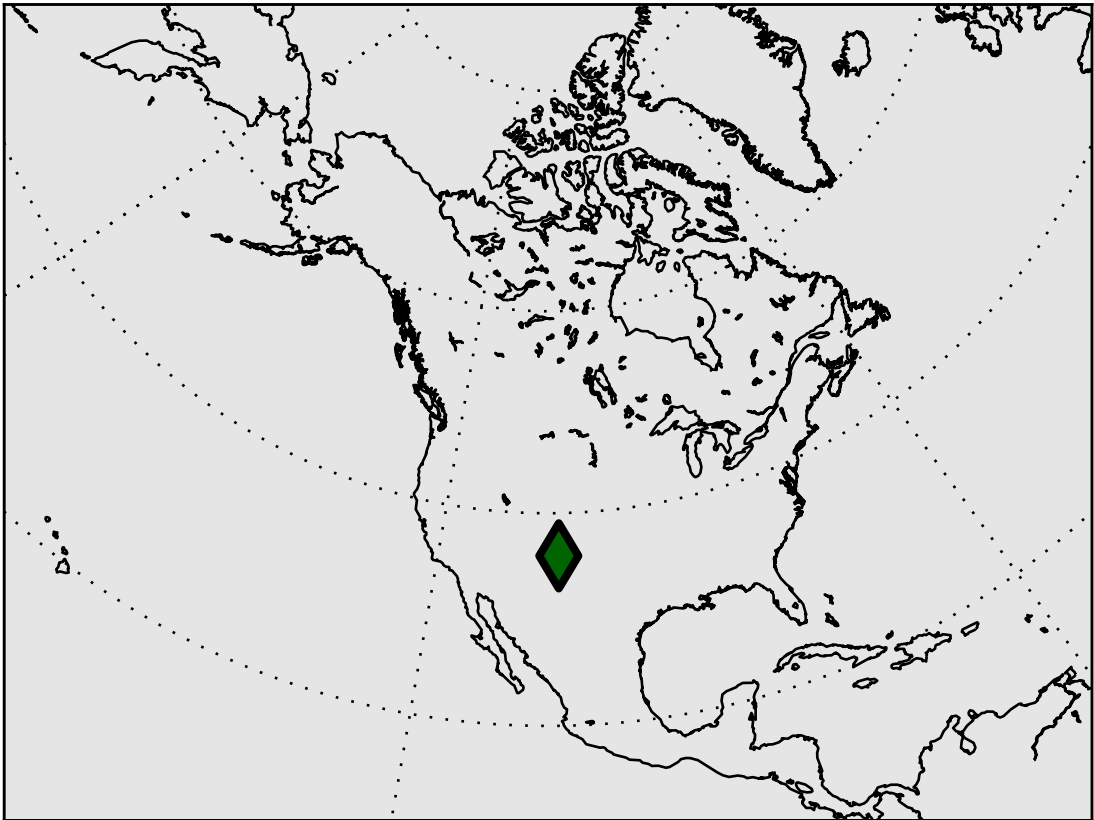

|                    |                                                       |
|--------------------|-------------------------------------------------------|
| Dataset name:      | StewartBog.Jimenez-Moreno.2008                        |
| Archive type:      | Peat                                                  |
| Proxy type:        | pollen                                                |
| Variable name:     | Pinus/Artemisia                                       |
| Latitude ( ° N):   | 35.8323                                               |
| Longitude ( ° E):  | -105.7225                                             |
| Elevation (m):     | 3116.0                                                |
| Interp. variable:  | T                                                     |
| Interp. detail:    | air@surface                                           |
| Interp. season:    | annual                                                |
| Interp. direction: | positive                                              |
| Pub. 1 title:      | Millennial- and centennial-scale vegetation and cl... |
| Pub. 1 authors:    | Jiménez-Moreno, Gonzalo;Fawcett, Peter J.;Scott An... |
| Pub. 1 year:       | 2008                                                  |
| Pub. 1 DOI:        | 10.1016/j.quascirev.2008.04.004                       |
| Original data URL: | wNAm                                                  |



Proxy data and metadata

Peat | pollen | StewartBog.Jimenez-Moreno.2008 | WEBE119d011

Proxy time series: Picea/Artemisia

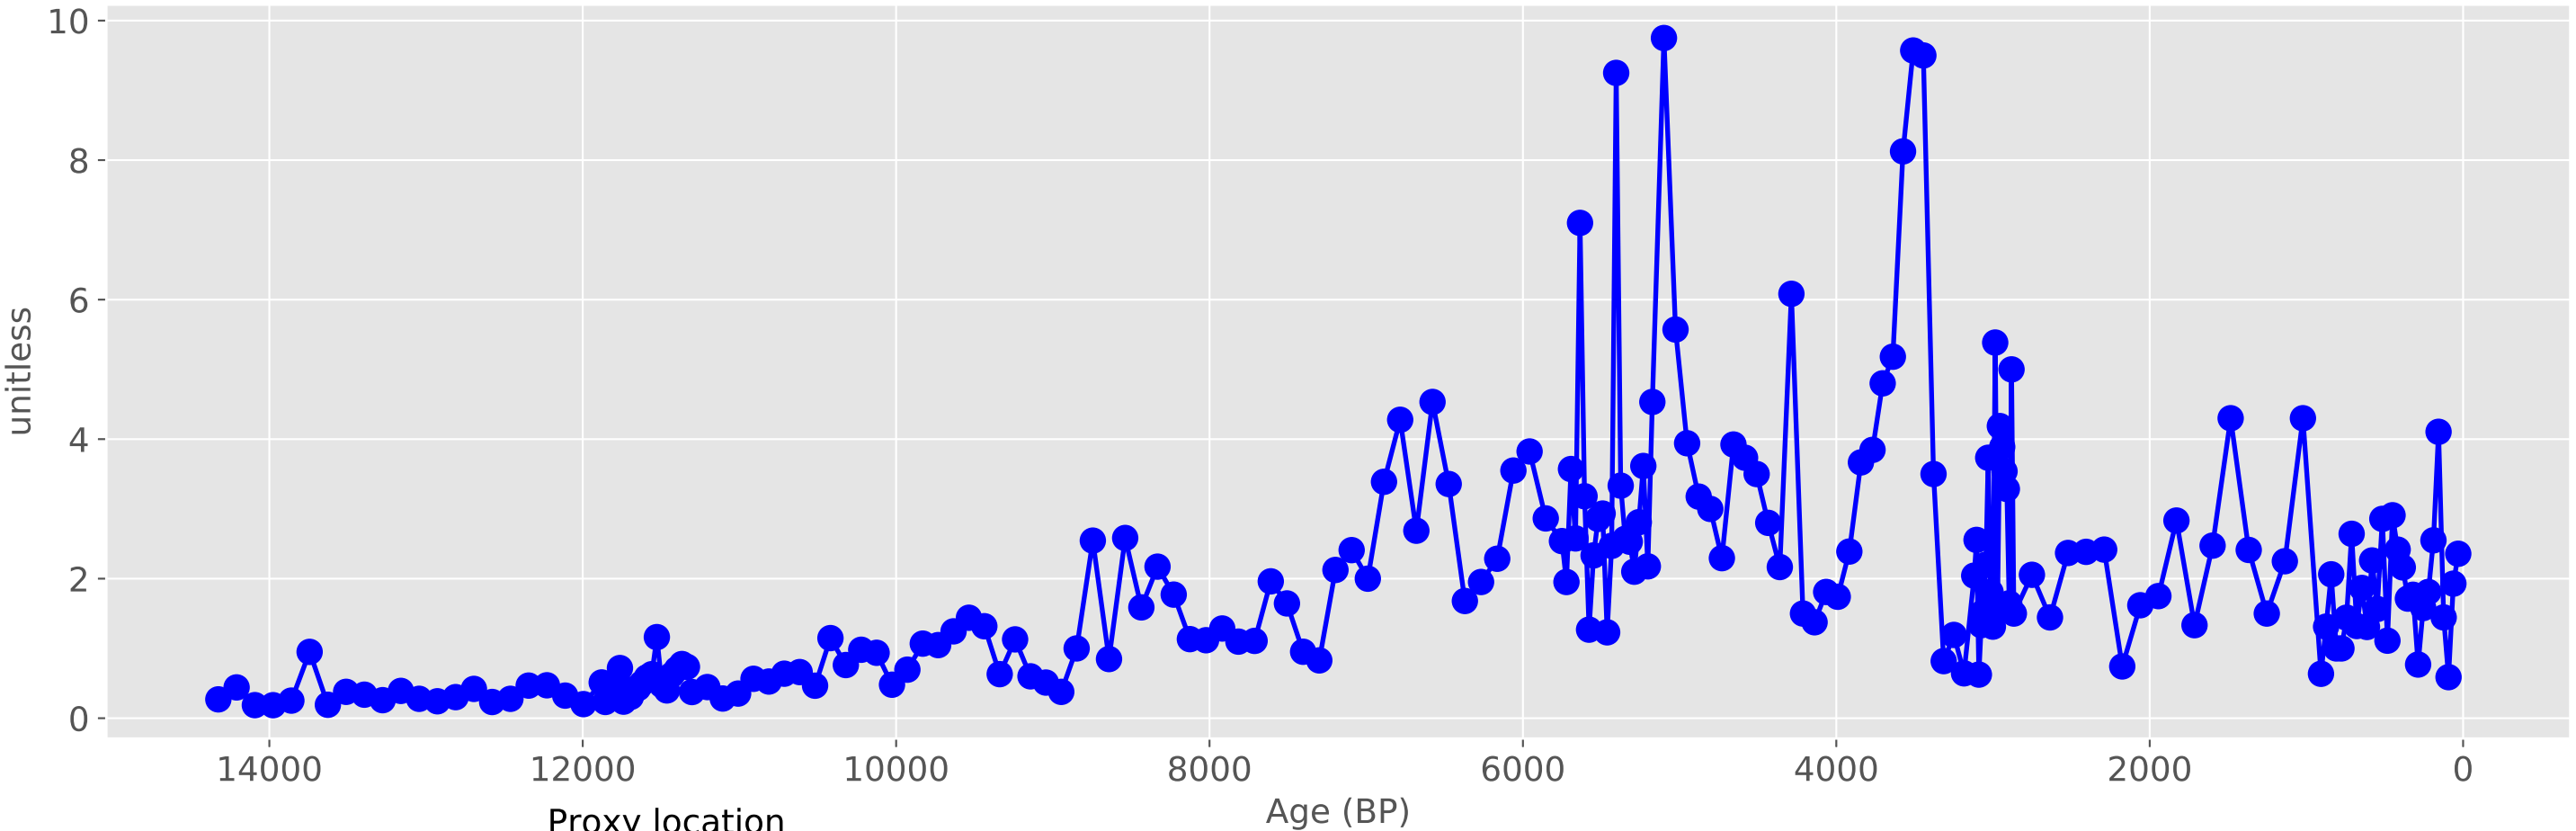

Proxy location  
(35.83 ° N, 105.72 ° W)



|                    |                                                       |
|--------------------|-------------------------------------------------------|
| Dataset name:      | StewartBog.Jimenez-Moreno.2008                        |
| Archive type:      | Peat                                                  |
| Proxy type:        | pollen                                                |
| Variable name:     | Picea/Artemisia                                       |
| Latitude ( ° N):   | 35.8323                                               |
| Longitude ( ° E):  | -105.7225                                             |
| Elevation (m):     | 3116.0                                                |
| Interp. variable:  | T                                                     |
| Interp. detail:    | air@surface                                           |
| Interp. season:    | annual                                                |
| Interp. direction: | positive                                              |
| Pub. 1 title:      | Millennial- and centennial-scale vegetation and cl... |
| Pub. 1 authors:    | Jiménez-Moreno, Gonzalo;Fawcett, Peter J.;Scott An... |
| Pub. 1 year:       | 2008                                                  |
| Pub. 1 DOI:        | 10.1016/j.quascirev.2008.04.004                       |
| Original data URL: | wNAm                                                  |

Proxy data and metadata

Peat | pollen | SouthernCalifornia.Ohlwein.2012 | LPDbf7cf949

Proxy time series: temperature

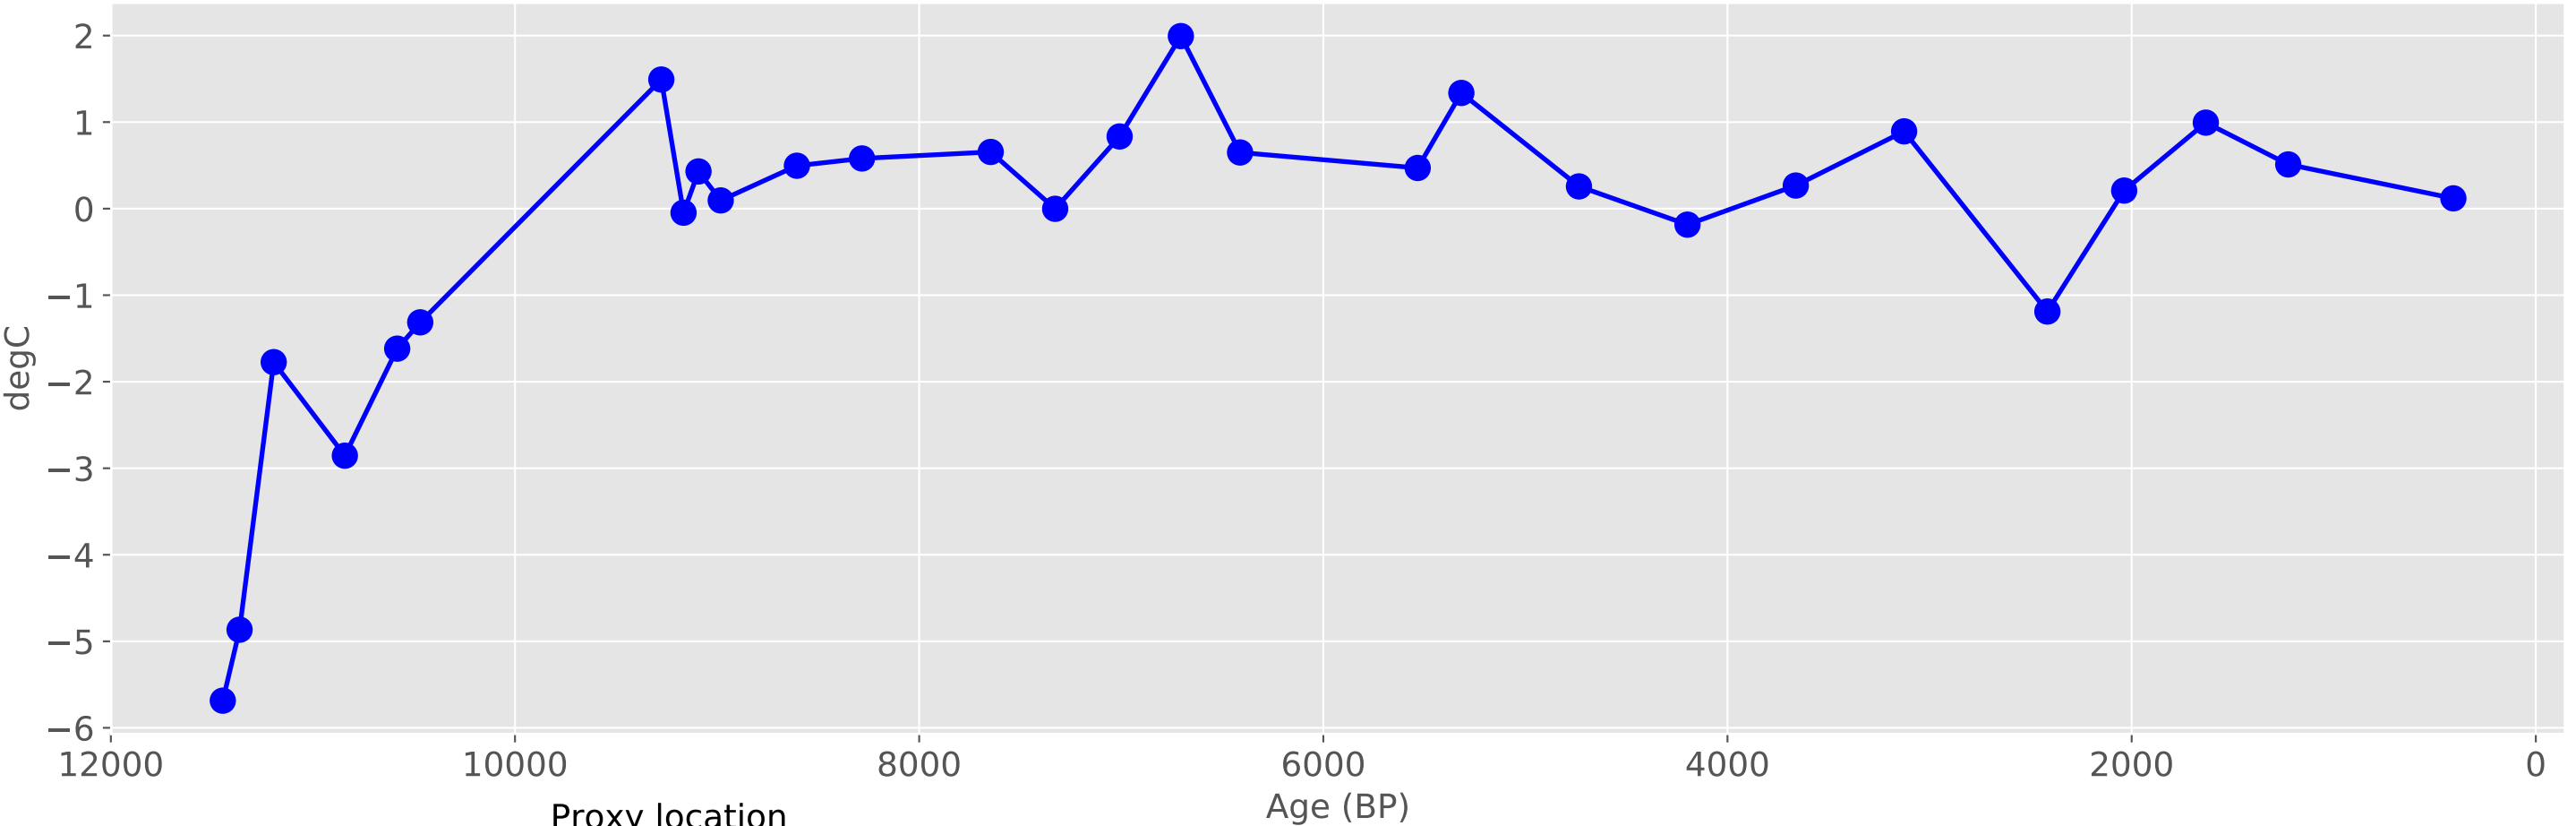

Proxy location  
(33.77 ° N, 116.66 ° W)

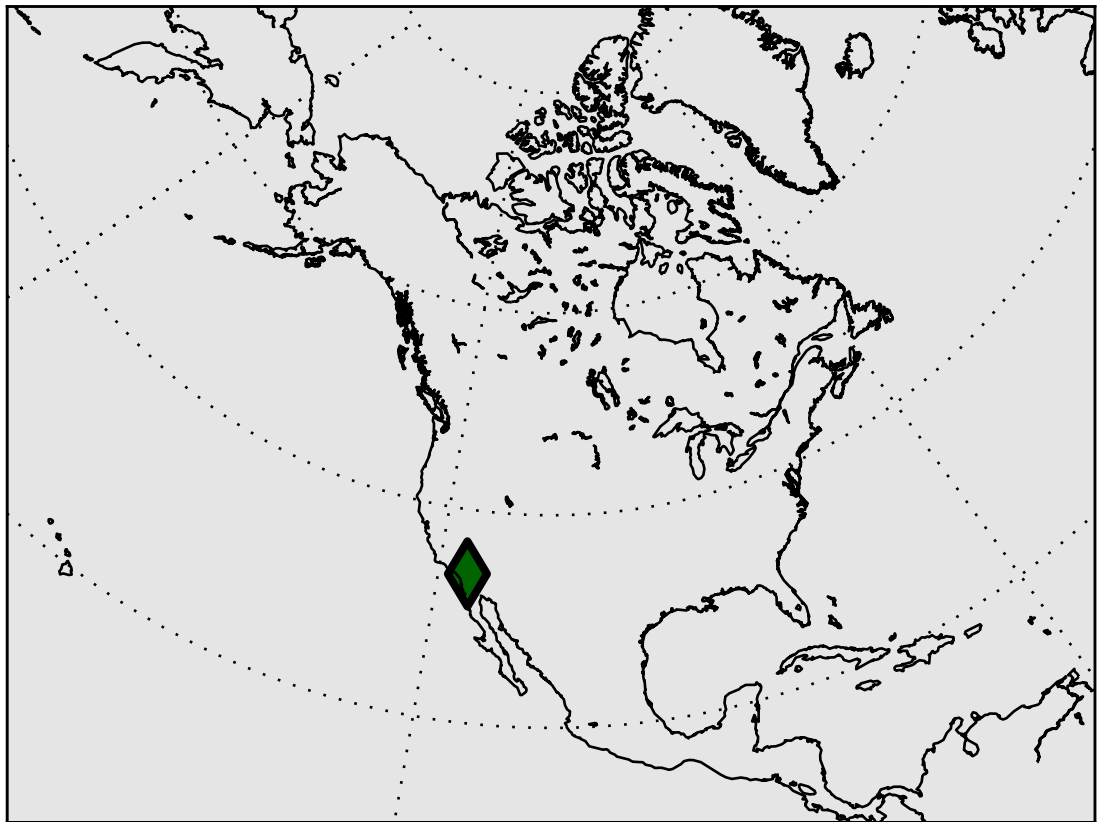

|                    |                                                       |
|--------------------|-------------------------------------------------------|
| Dataset name:      | SouthernCalifornia.Ohlwein.2012                       |
| Archive type:      | Peat                                                  |
| Proxy type:        | pollen                                                |
| Variable name:     | temperature                                           |
| Latitude ( ° N):   | 33.7689                                               |
| Longitude ( ° E):  | -116.66                                               |
| Elevation (m):     | 2399.0                                                |
| Interp. variable:  | T                                                     |
| Interp. detail:    | air@surface                                           |
| Interp. season:    | summerOnly                                            |
| Interp. direction: | positive                                              |
| Pub. 1 title:      | Review of probabilistic pollen-climate transfer me... |
| Pub. 1 authors:    | Ohlwein, Christian; Wahl, Eugene R.                   |
| Pub. 1 year:       | 2012                                                  |
| Pub. 1 DOI:        | 10.1016/j.quascirev.2011.11.002                       |
| Original data URL: | www.ncdc.noaa.gov/paleo/study/27330                   |

Proxy data and metadata

Peat | pollen | SouthernCalifornia.Ohlwein.2012 | LPDbf7cf950c

Proxy time series: Panom

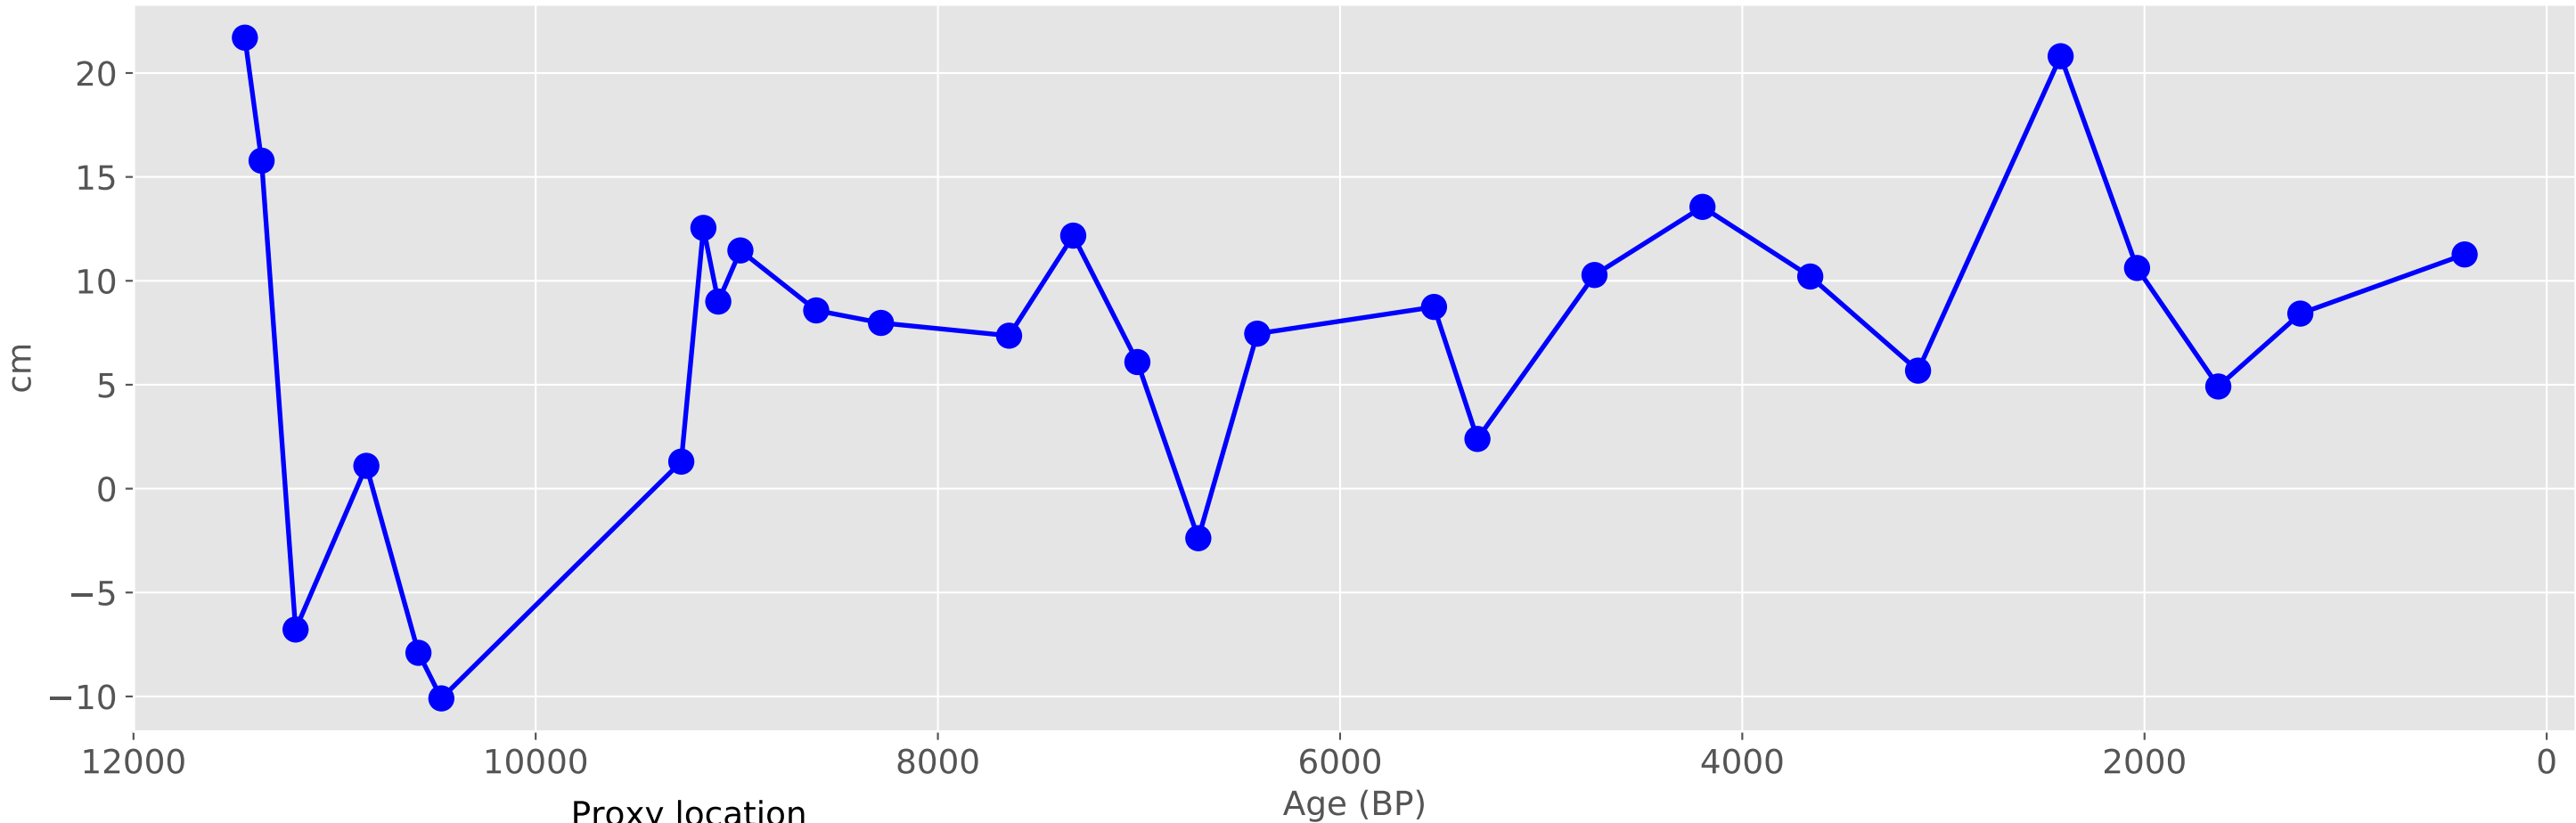

|                    |                                                       |
|--------------------|-------------------------------------------------------|
| Dataset name:      | SouthernCalifornia.Ohlwein.2012                       |
| Archive type:      | Peat                                                  |
| Proxy type:        | pollen                                                |
| Variable name:     | Panom                                                 |
| Latitude ( ° N):   | 33.7689                                               |
| Longitude ( ° E):  | -116.66                                               |
| Elevation (m):     | 2399.0                                                |
| Interp. variable:  | P                                                     |
| Interp. detail:    | @surface                                              |
| Interp. season:    | annual                                                |
| Interp. direction: | positive                                              |
| Pub. 1 title:      | Review of probabilistic pollen-climate transfer me... |
| Pub. 1 authors:    | Ohlwein, Christian; Wahl, Eugene R.                   |
| Pub. 1 year:       | 2012                                                  |
| Pub. 1 DOI:        | 10.1016/j.quascirev.2011.11.002                       |
| Original data URL: | www.ncdc.noaa.gov/paleo/study/27330                   |

Proxy data and metadata

Speleothem | d13C | MinnetonkaCave.Lundeen.2013 | GHc8e0777d

Proxy time series: d13C

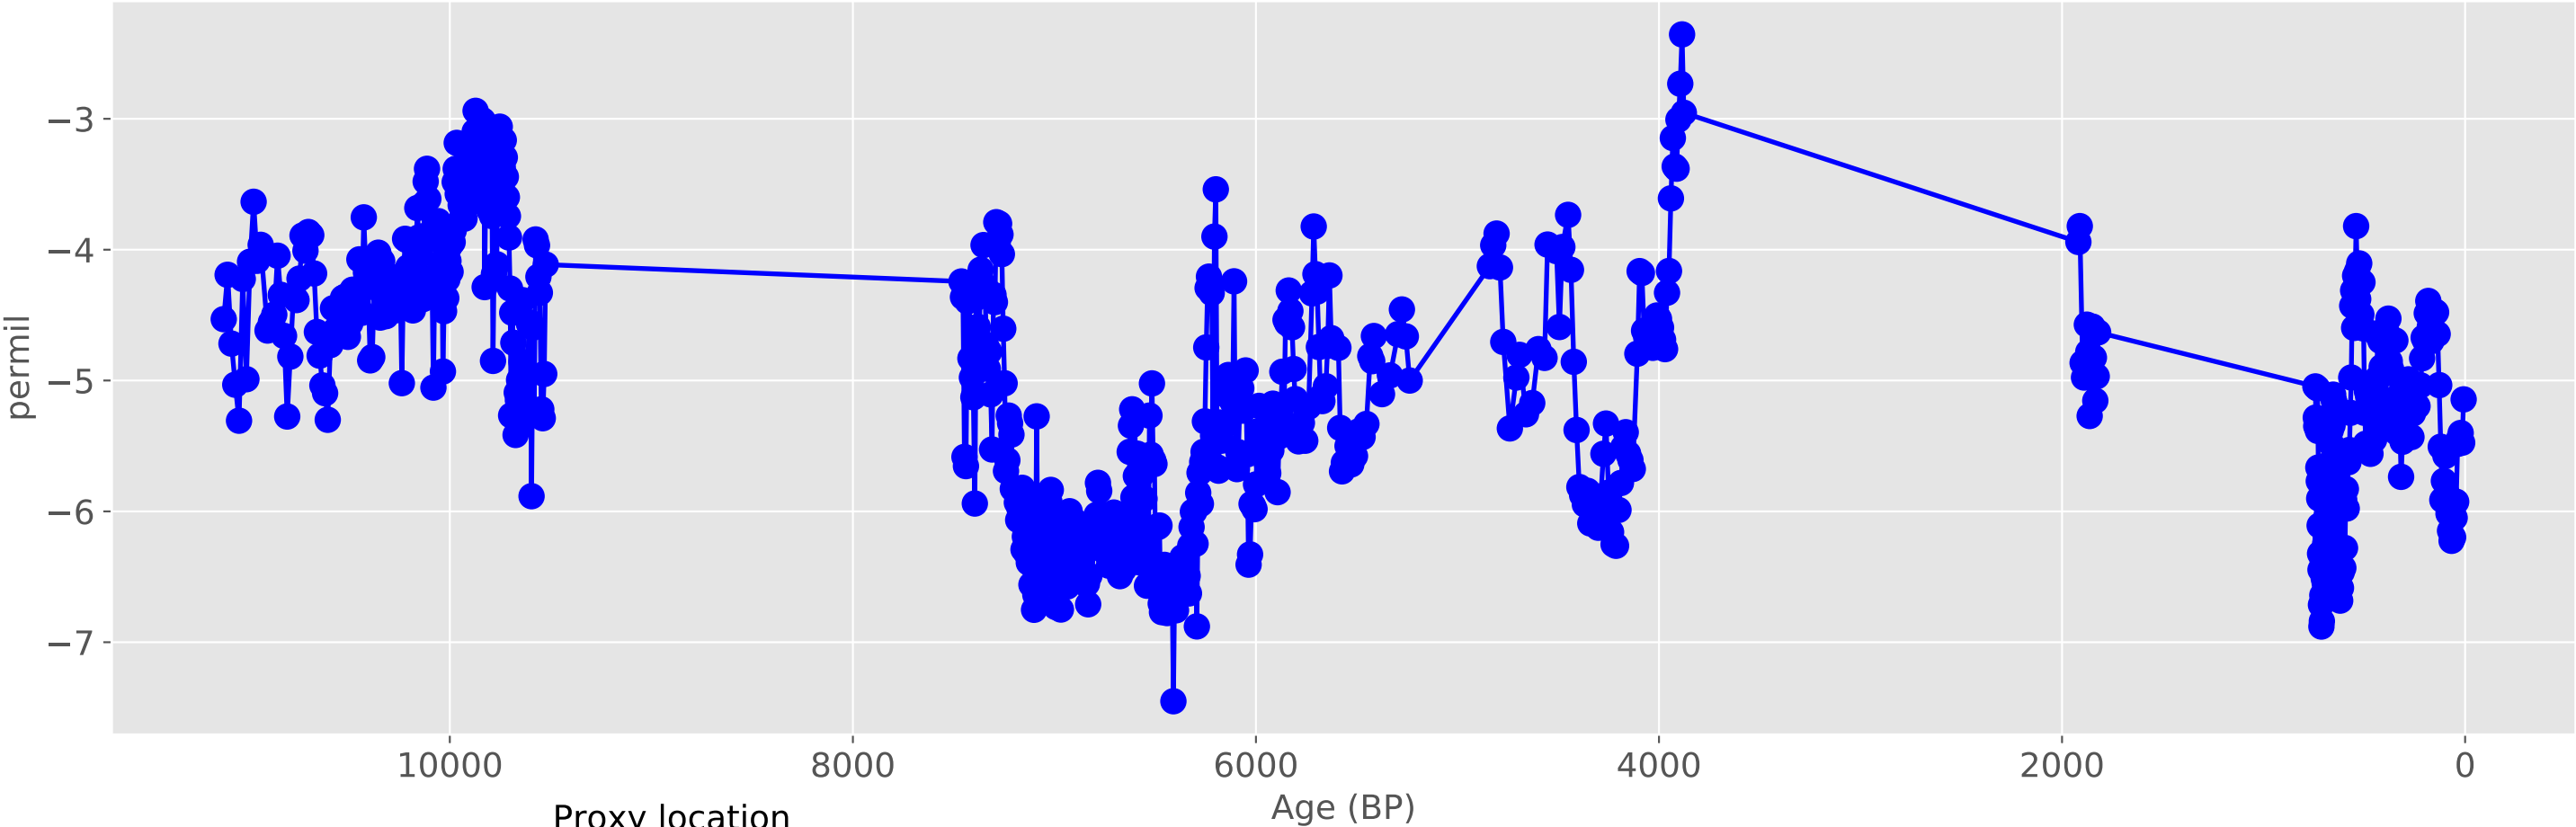

Proxy location  
(42.09 ° N, 111.52 ° W)

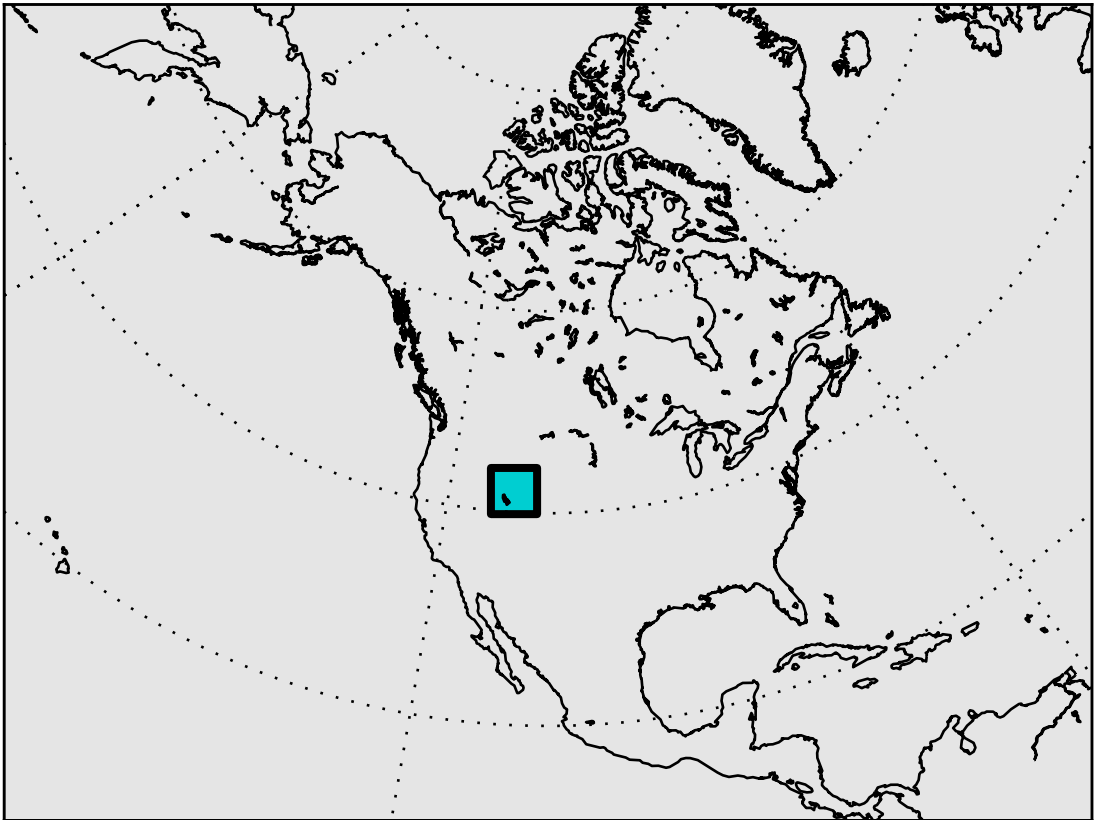

|                    |                                                                                              |
|--------------------|----------------------------------------------------------------------------------------------|
| Dataset name:      | MinnetonkaCave.Lundeen.2013                                                                  |
| Archive type:      | Speleothem                                                                                   |
| Proxy type:        | d13C                                                                                         |
| Variable name:     | d13C                                                                                         |
| Latitude ( ° N):   | 42.088                                                                                       |
| Longitude ( ° E):  | -111.5187                                                                                    |
| Elevation (m):     | 2346.96                                                                                      |
| Interp. variable:  | P                                                                                            |
| Interp. detail:    | @surface                                                                                     |
| Interp. season:    | winterOnly                                                                                   |
| Interp. direction: | positive                                                                                     |
| Pub. 1 title:      | A speleothem record of Holocene paleoclimate from ...                                        |
| Pub. 1 authors:    | Lundeen, Zachary; Brunelle, Andrea; Burns, Stephen...                                        |
| Pub. 1 year:       | 2013                                                                                         |
| Pub. 1 DOI:        | 10.1016/j.quaint.2013.03.018                                                                 |
| Original data URL: | <a href="http://www.ncdc.noaa.gov/paleo/study/23097">www.ncdc.noaa.gov/paleo/study/23097</a> |

Proxy data and metadata  
Speleothem | d13C | OregonCaves.Ersek.2012 | GHb0707701

Proxy time series: d13C

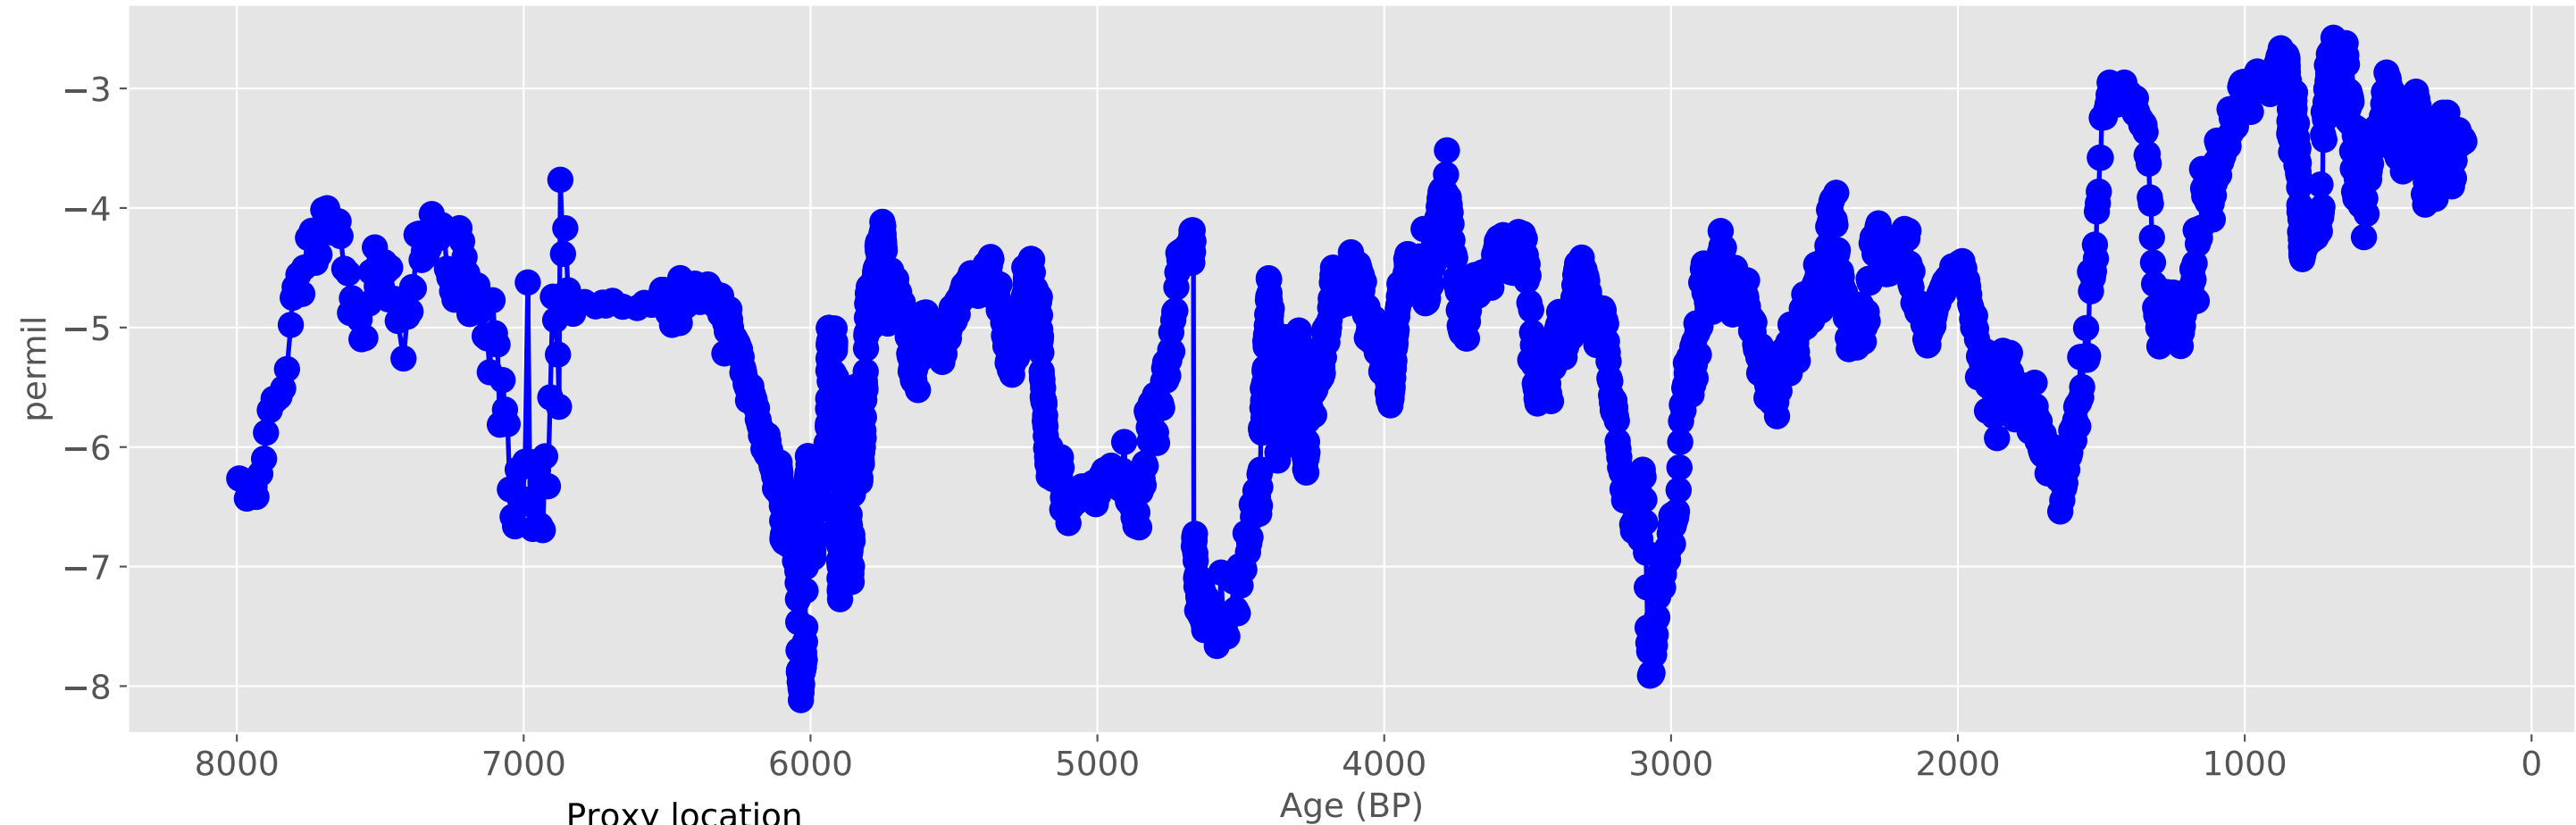

Proxy location  
(42.08 ° N, 123.42 ° W)

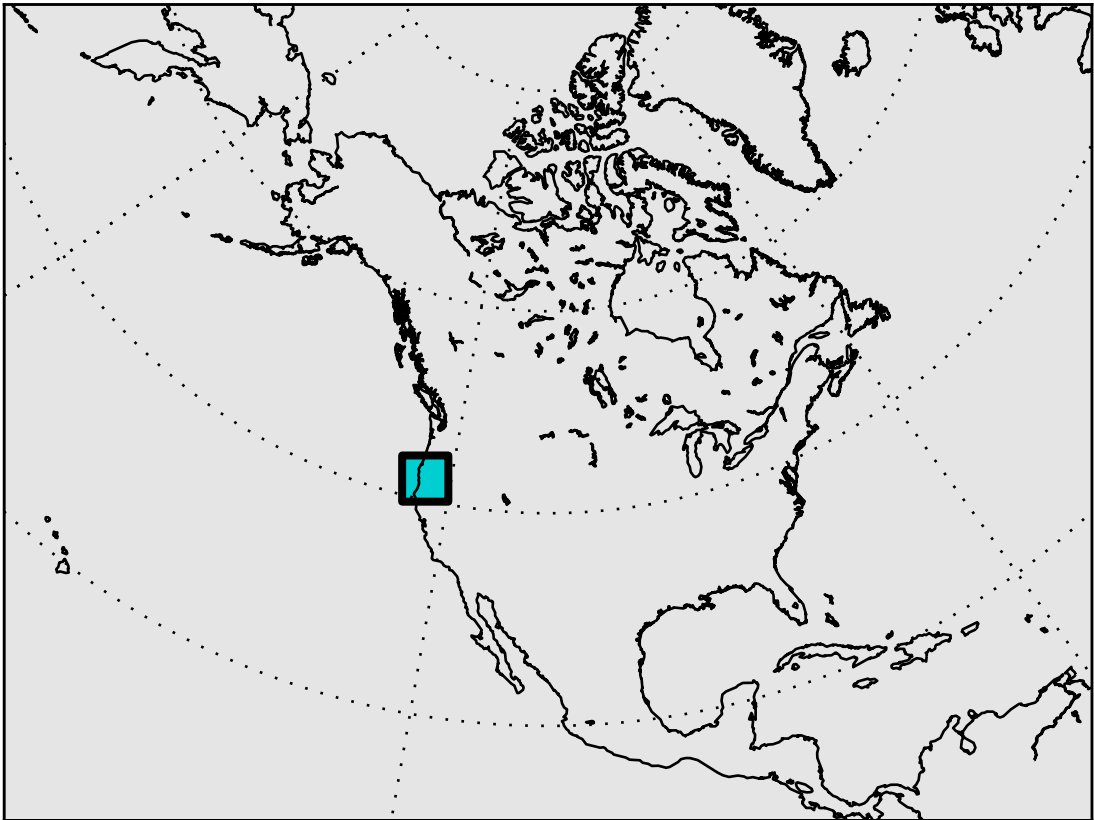

|                    |                                                                                              |
|--------------------|----------------------------------------------------------------------------------------------|
| Dataset name:      | OregonCaves.Ersek.2012                                                                       |
| Archive type:      | Speleothem                                                                                   |
| Proxy type:        | d13C                                                                                         |
| Variable name:     | d13C                                                                                         |
| Latitude ( ° N):   | 42.083                                                                                       |
| Longitude ( ° E):  | -123.416                                                                                     |
| Elevation (m):     | 1390.0                                                                                       |
| Interp. variable:  | P-E                                                                                          |
| Interp. detail:    | @surface                                                                                     |
| Interp. season:    | winterOnly                                                                                   |
| Interp. direction: | positive                                                                                     |
| Pub. 1 title:      | Holocene winter climate variability in mid-latitud...                                        |
| Pub. 1 authors:    | Ersek, Vasile; Clark, Peter U.; Mix, Alan C.; Chen...                                        |
| Pub. 1 year:       | 2012                                                                                         |
| Pub. 1 DOI:        | 10.1038/ncomms2222                                                                           |
| Original data URL: | <a href="http://www.ncdc.noaa.gov/paleo/study/13543">www.ncdc.noaa.gov/paleo/study/13543</a> |

Proxy data and metadata

Speleothem | d13C | LehmanCaves.Steponaitis.2015 | WEB5432df9c

Proxy time series: d13C

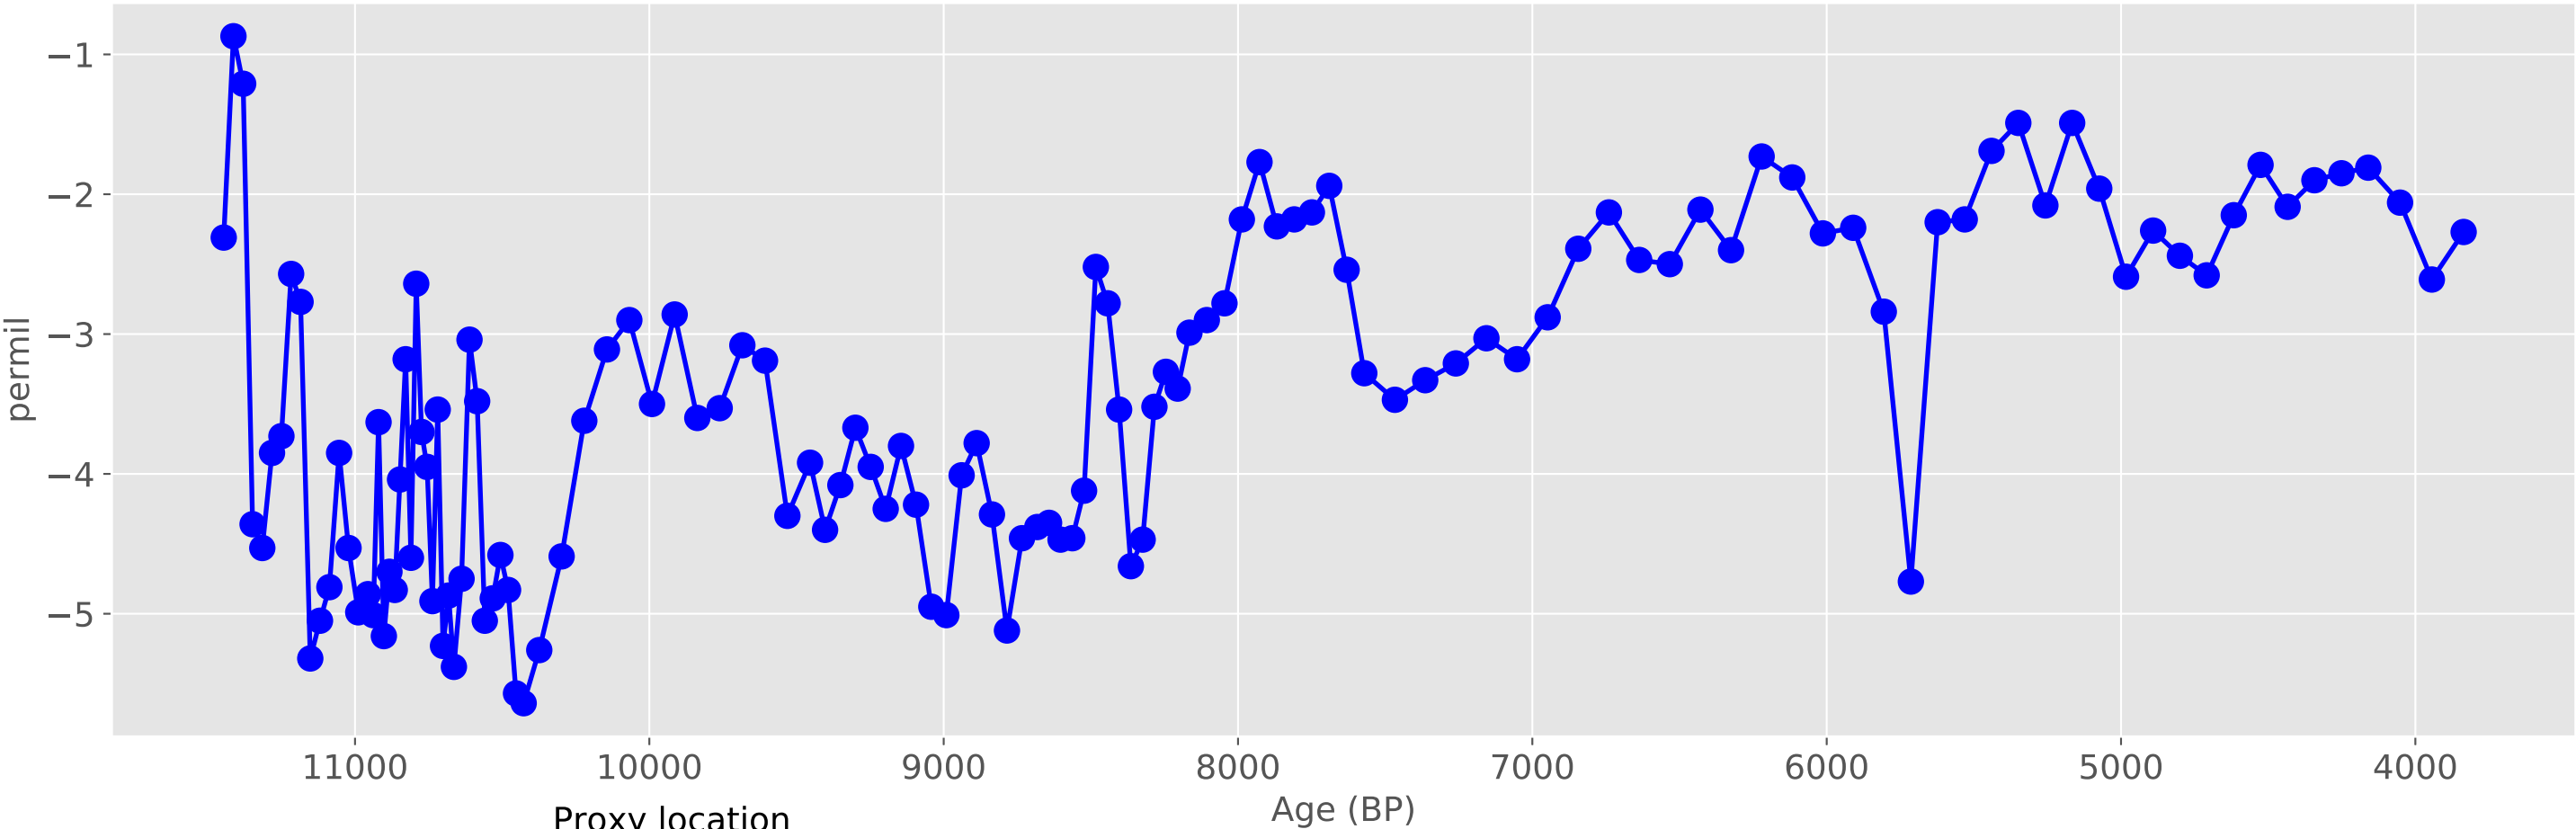

Proxy location  
(39.00 ° N, 114.22 ° W)

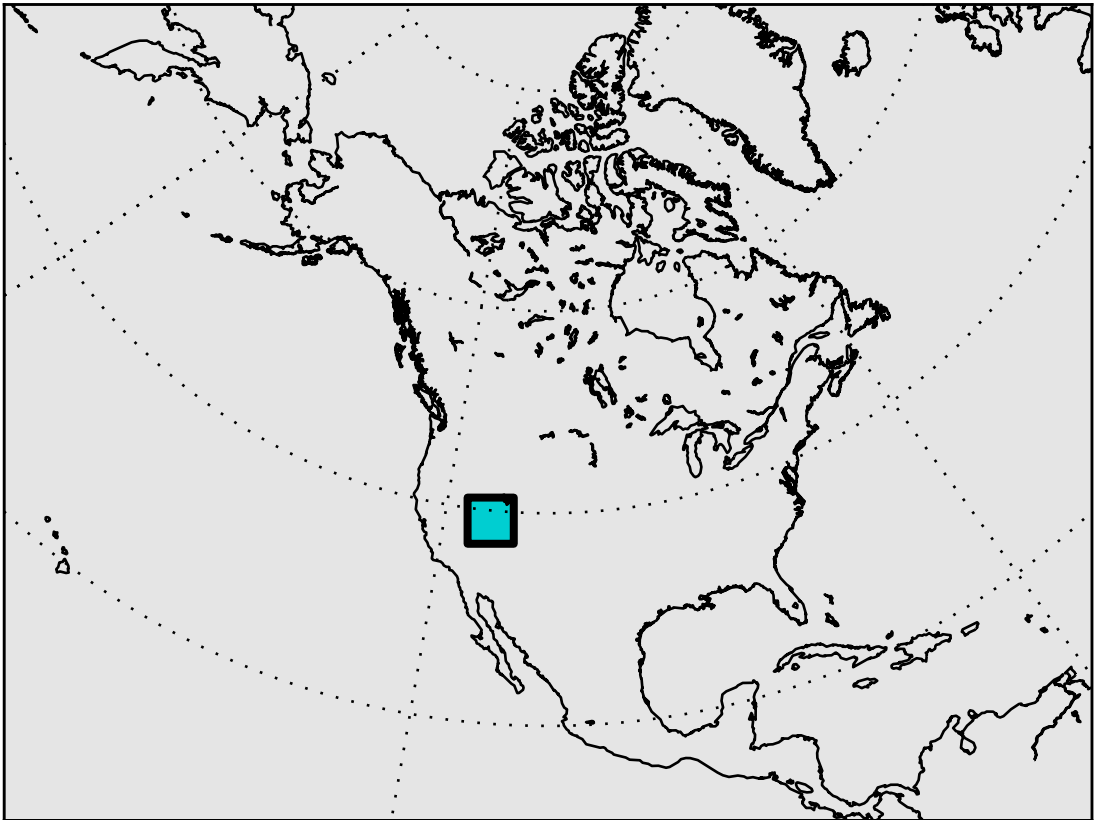

|                    |                                                       |
|--------------------|-------------------------------------------------------|
| Dataset name:      | LehmanCaves.Steponaitis.2015                          |
| Archive type:      | Speleothem                                            |
| Proxy type:        | d13C                                                  |
| Variable name:     | d13C                                                  |
| Latitude ( ° N):   | 39.0006                                               |
| Longitude ( ° E):  | -114.2203                                             |
| Elevation (m):     | 2130.0                                                |
| Interp. variable:  | P-E                                                   |
| Interp. detail:    | infiltration                                          |
| Interp. season:    | winterOnly                                            |
| Interp. direction: | negative                                              |
| Pub. 1 title:      | Mid-Holocene drying of the U.S. Great Basin record... |
| Pub. 1 authors:    | Steponaitis, Elena;Andrews, Alexandra;McGee, David... |
| Pub. 1 year:       | 2015                                                  |
| Pub. 1 DOI:        | 10.1016/j.quascirev.2015.04.011                       |
| Original data URL: | www.ncdc.noaa.gov/paleo/study/19038                   |



Proxy data and metadata  
Speleothem | d13C | Leviathan.Lachniet.2014 | LPDa57620f7bb

Proxy time series: d13C

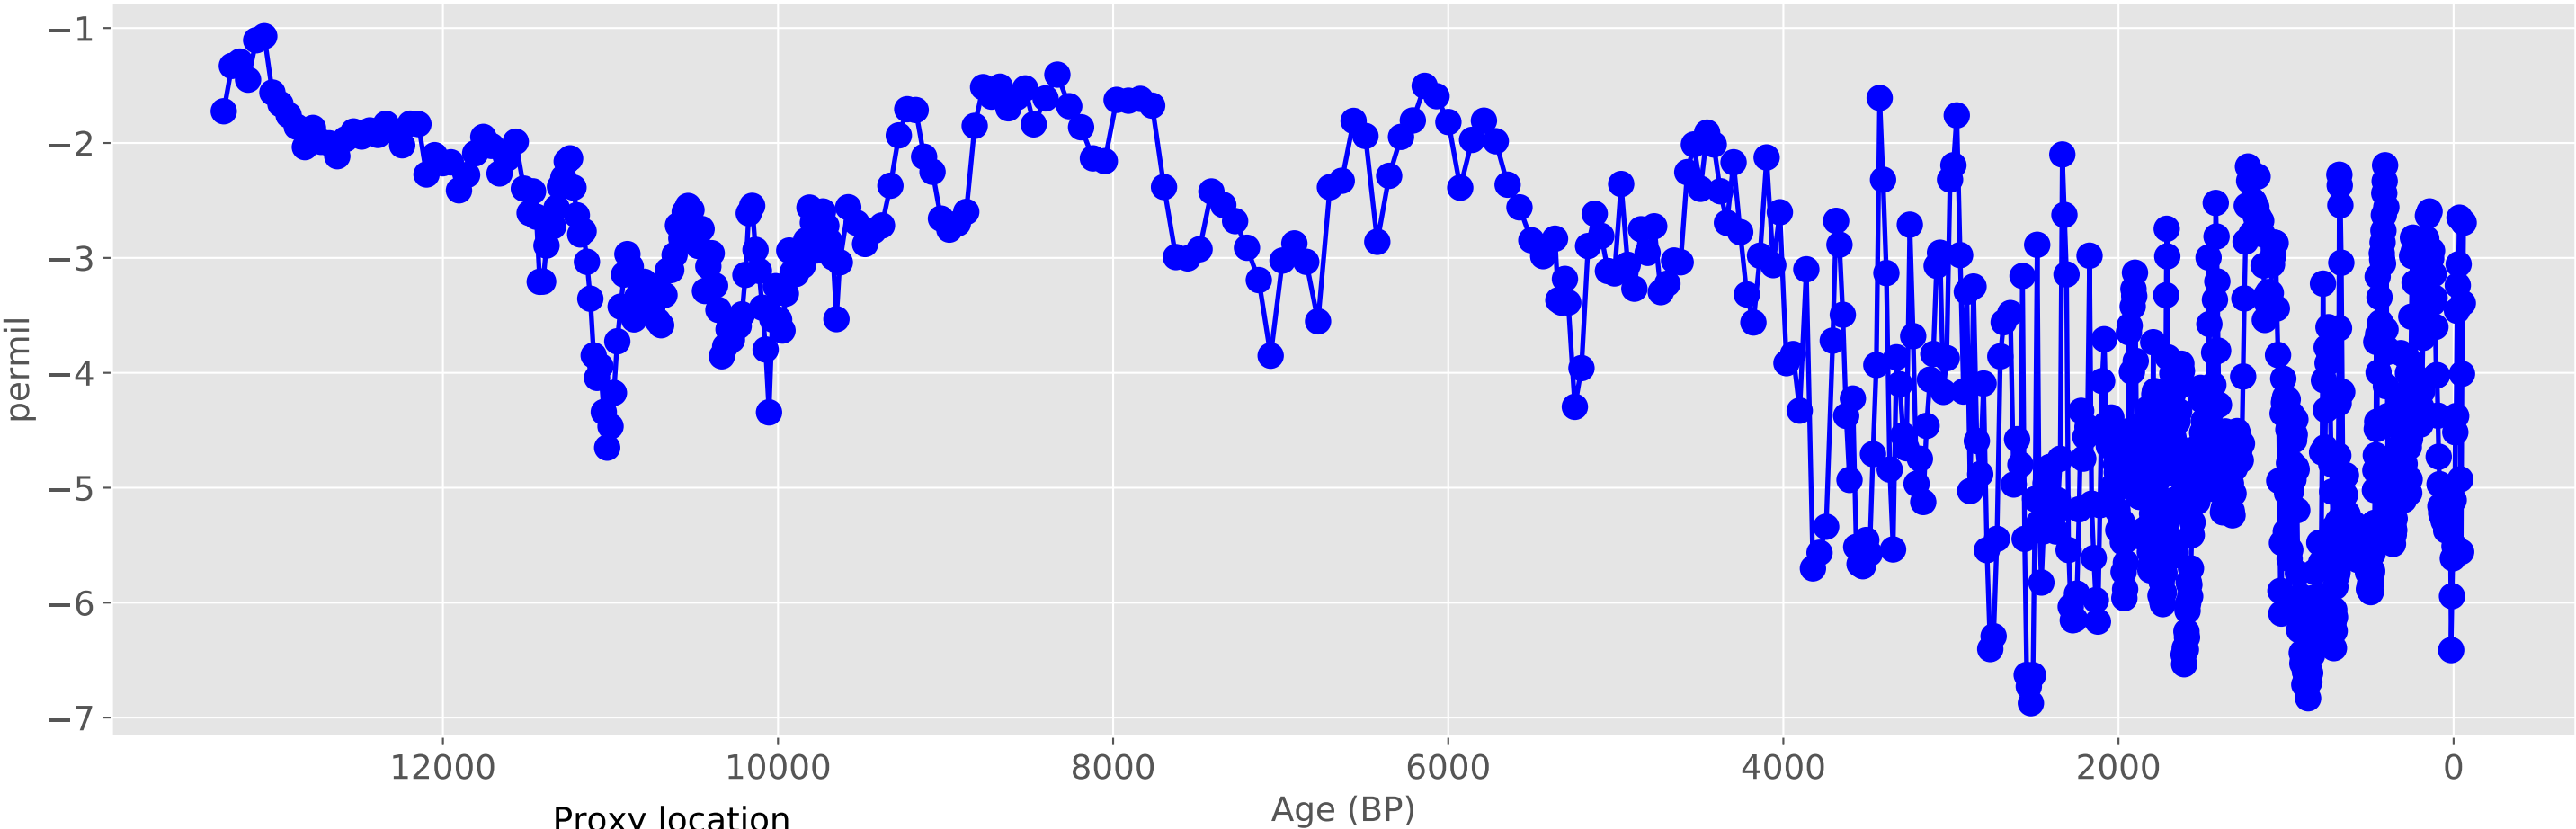

Proxy location  
(37.89° N, 115.58° W)

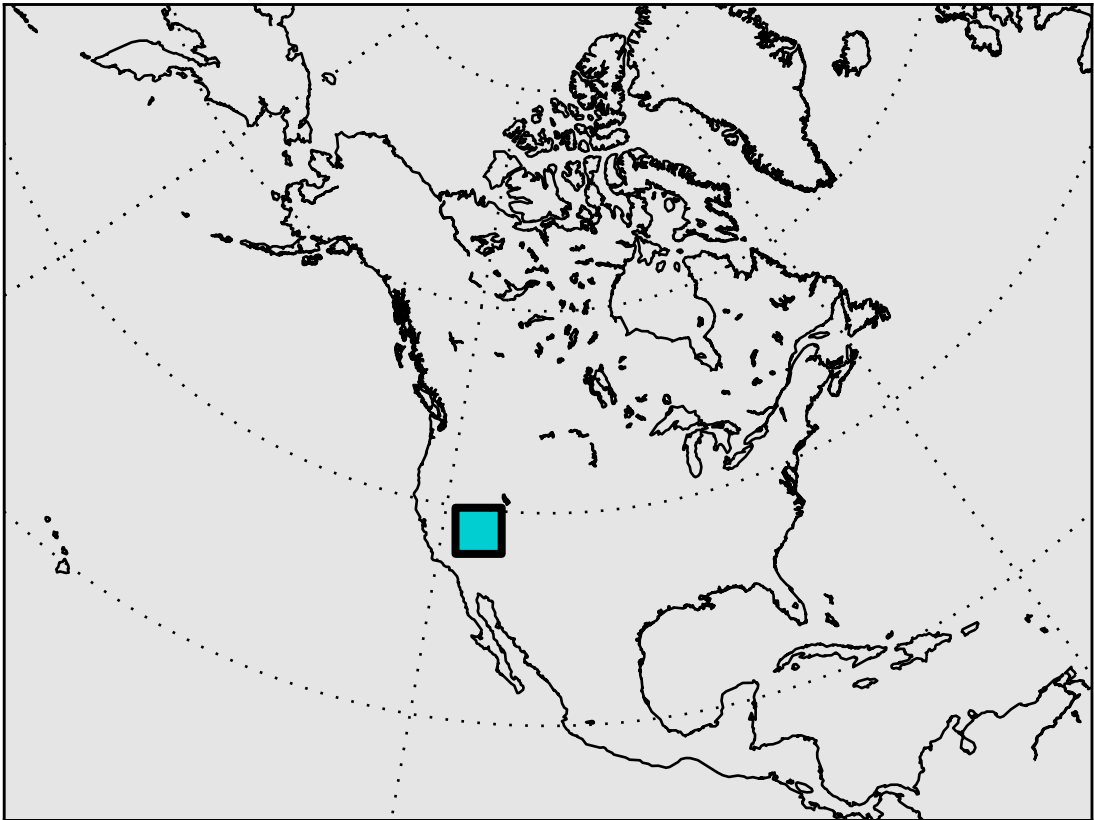

|                    |                                                                                              |
|--------------------|----------------------------------------------------------------------------------------------|
| Dataset name:      | Leviathan.Lachniet.2014                                                                      |
| Archive type:      | Speleothem                                                                                   |
| Proxy type:        | d13C                                                                                         |
| Variable name:     | d13C                                                                                         |
| Latitude (° N):    | 37.89                                                                                        |
| Longitude (° E):   | -115.58                                                                                      |
| Elevation (m):     | 2400.0                                                                                       |
| Interp. variable:  | P-E                                                                                          |
| Interp. detail:    | soilMoisture                                                                                 |
| Interp. season:    | annual                                                                                       |
| Interp. direction: | negative                                                                                     |
| Pub. 1 title:      | Orbital control of western North America atmospher...                                        |
| Pub. 1 authors:    | Lachniet, Matthew S.; Denniston, Rhawn F.; Asmerom...                                        |
| Pub. 1 year:       | 2014                                                                                         |
| Pub. 1 DOI:        | 10.1038/ncomms4805                                                                           |
| Original data URL: | <a href="http://www.ncdc.noaa.gov/paleo/study/16517">www.ncdc.noaa.gov/paleo/study/16517</a> |

Proxy data and metadata  
Speleothem | d13C | Macal.Akers.2016 | WEB33ec2581

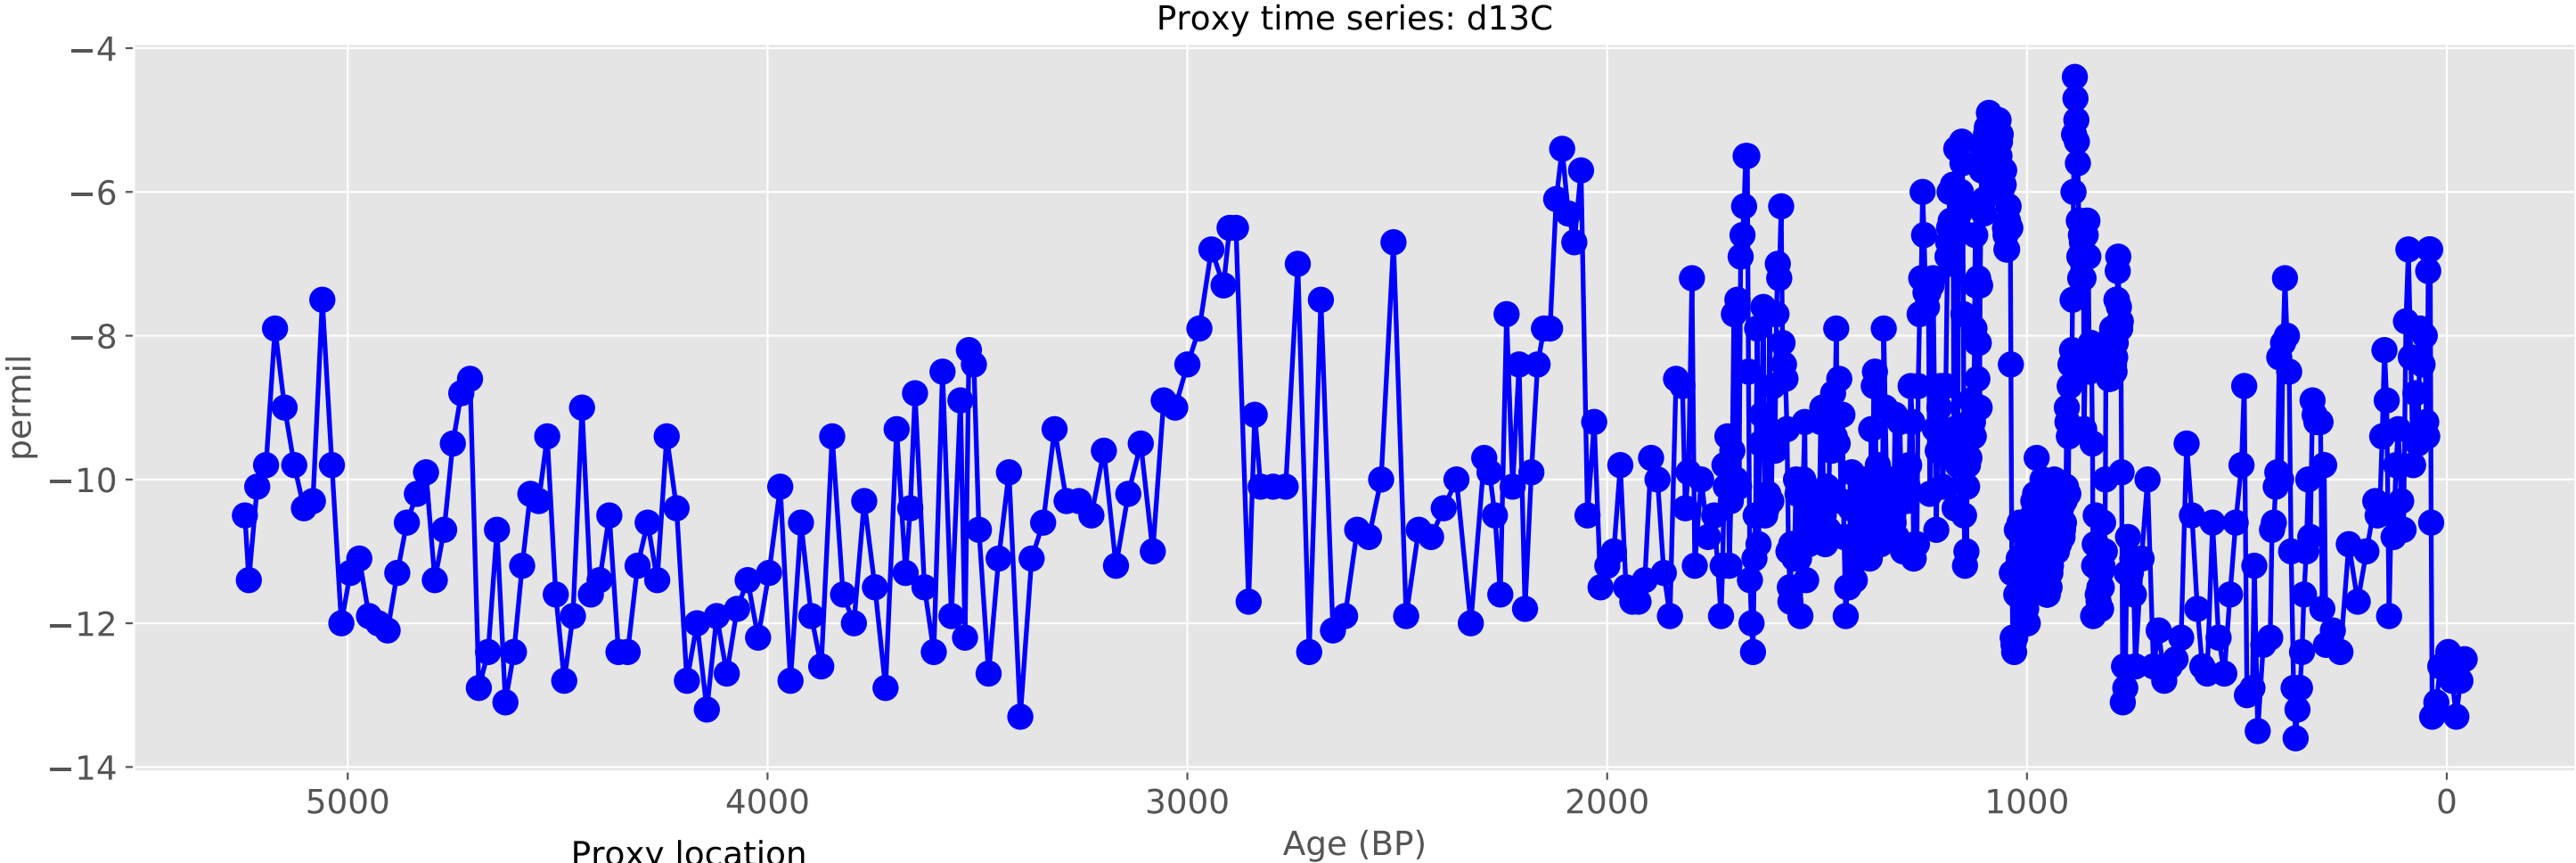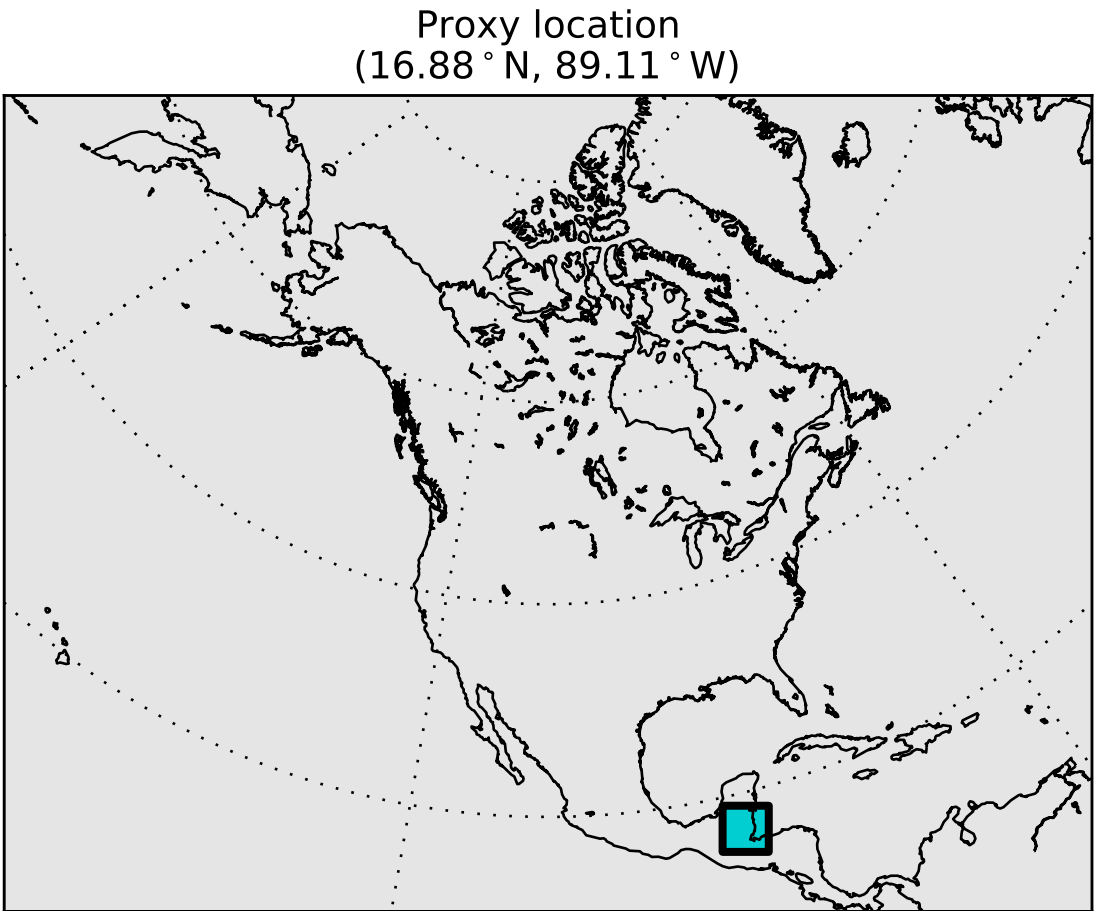

|                    |                                                                                              |
|--------------------|----------------------------------------------------------------------------------------------|
| Dataset name:      | Macal.Akers.2016                                                                             |
| Archive type:      | Speleothem                                                                                   |
| Proxy type:        | d13C                                                                                         |
| Variable name:     | d13C                                                                                         |
| Latitude (° N):    | 16.883                                                                                       |
| Longitude (° E):   | -89.108                                                                                      |
| Elevation (m):     | 530.0                                                                                        |
| Interp. variable:  | P-E                                                                                          |
| Interp. detail:    | @surface                                                                                     |
| Interp. season:    | annual                                                                                       |
| Interp. direction: | negative                                                                                     |
| Pub. 1 title:      | An extended and higher-resolution record of climat...                                        |
| Pub. 1 authors:    | Akers, Pete D.                                                                               |
| Pub. 1 year:       | 2016                                                                                         |
| Pub. 1 DOI:        | 10.1016/j.palaeo.2016.07.007                                                                 |
| Original data URL: | <a href="http://www.ncdc.noaa.gov/paleo/study/20506">www.ncdc.noaa.gov/paleo/study/20506</a> |

Proxy data and metadata

Speleothem | d18O | MinnetonkaCave.Lundeen.2013 | GH250fcb25

Proxy time series: d18O

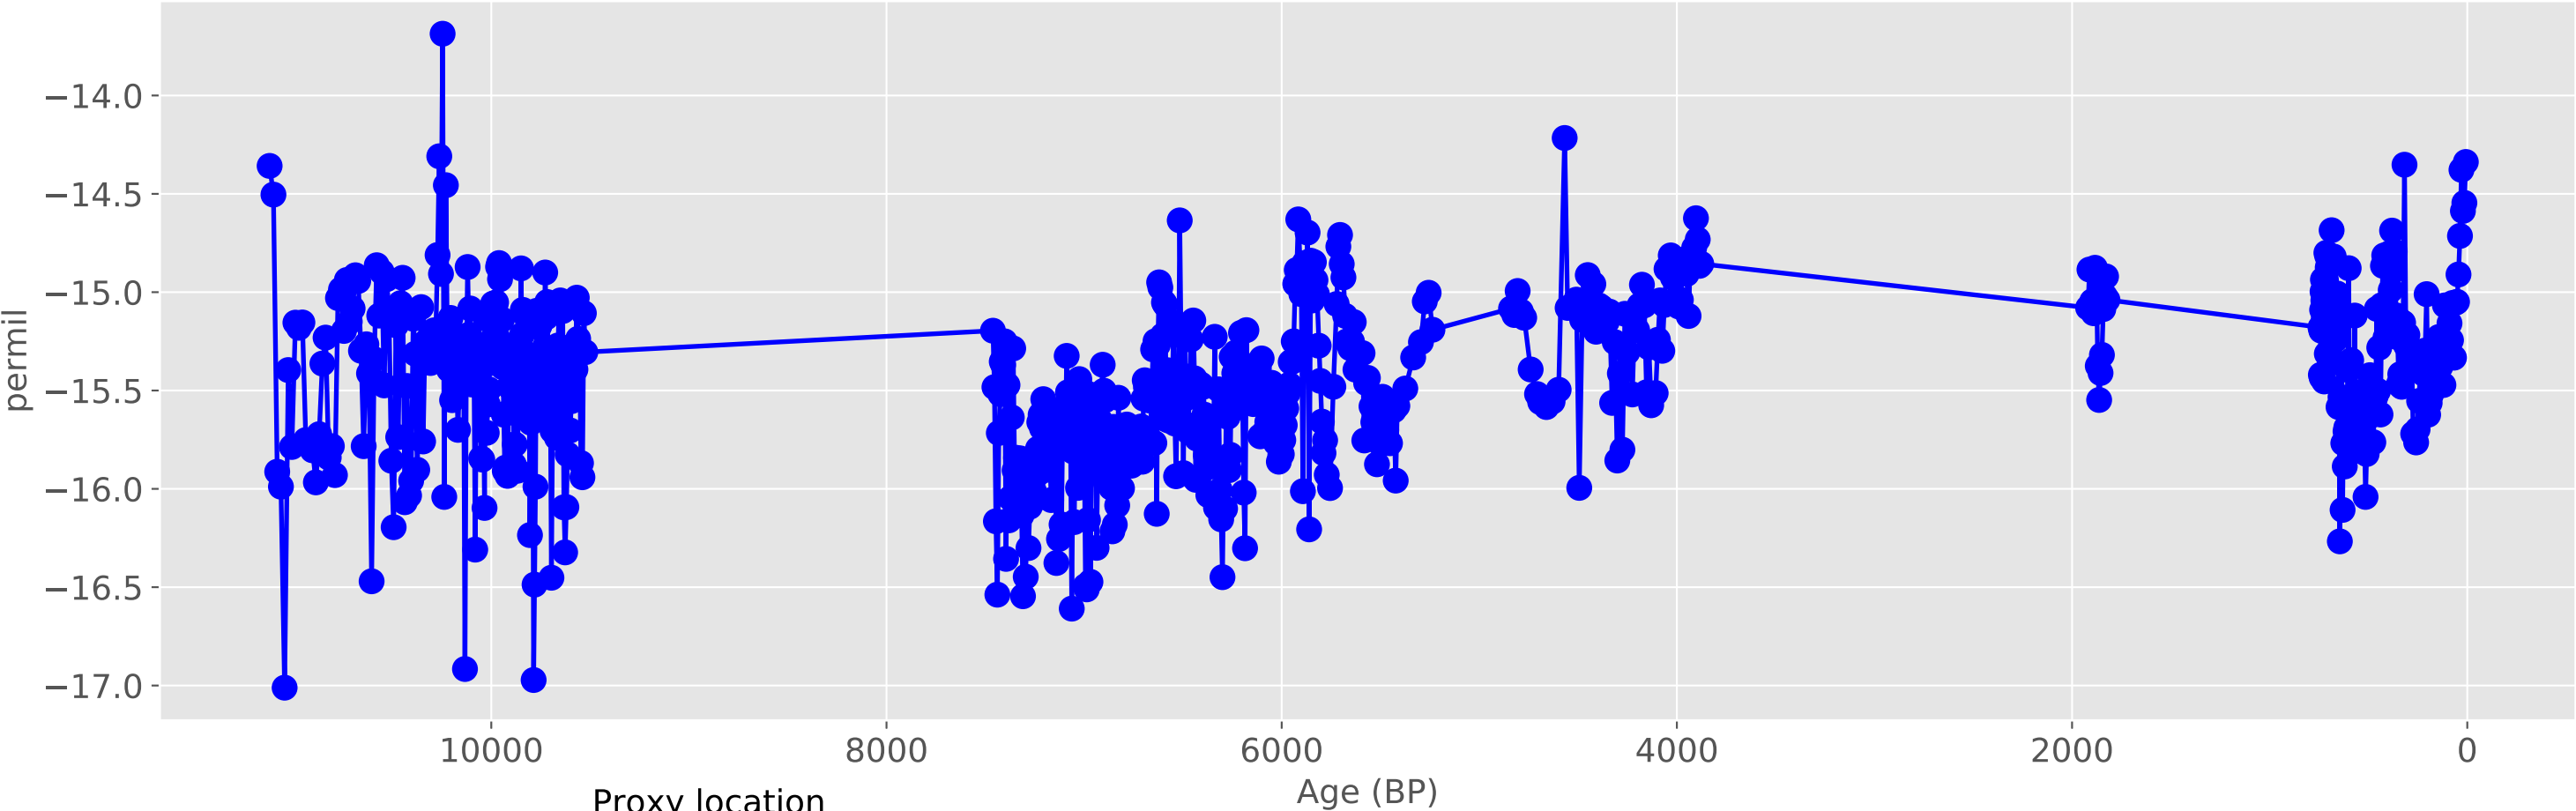

Proxy location  
(42.09 ° N, 111.52 ° W)



|                    |                                                                                              |
|--------------------|----------------------------------------------------------------------------------------------|
| Dataset name:      | MinnetonkaCave.Lundeen.2013                                                                  |
| Archive type:      | Speleothem                                                                                   |
| Proxy type:        | d18O                                                                                         |
| Variable name:     | d18O                                                                                         |
| Latitude ( ° N):   | 42.088                                                                                       |
| Longitude ( ° E):  | -111.5187                                                                                    |
| Elevation (m):     | 2346.96                                                                                      |
| Interp. variable:  | T                                                                                            |
| Interp. detail:    | air@surface                                                                                  |
| Interp. season:    | winterOnly                                                                                   |
| Interp. direction: | positive                                                                                     |
| Pub. 1 title:      | A speleothem record of Holocene paleoclimate from ...                                        |
| Pub. 1 authors:    | Lundeen, Zachary; Brunelle, Andrea; Burns, Stephen...                                        |
| Pub. 1 year:       | 2013                                                                                         |
| Pub. 1 DOI:        | 10.1016/j.quaint.2013.03.018                                                                 |
| Original data URL: | <a href="http://www.ncdc.noaa.gov/paleo/study/23097">www.ncdc.noaa.gov/paleo/study/23097</a> |

Proxy data and metadata

Speleothem | d18O | OregonCaves.Ersek.2012 | GHe7662255

Proxy time series: d18O

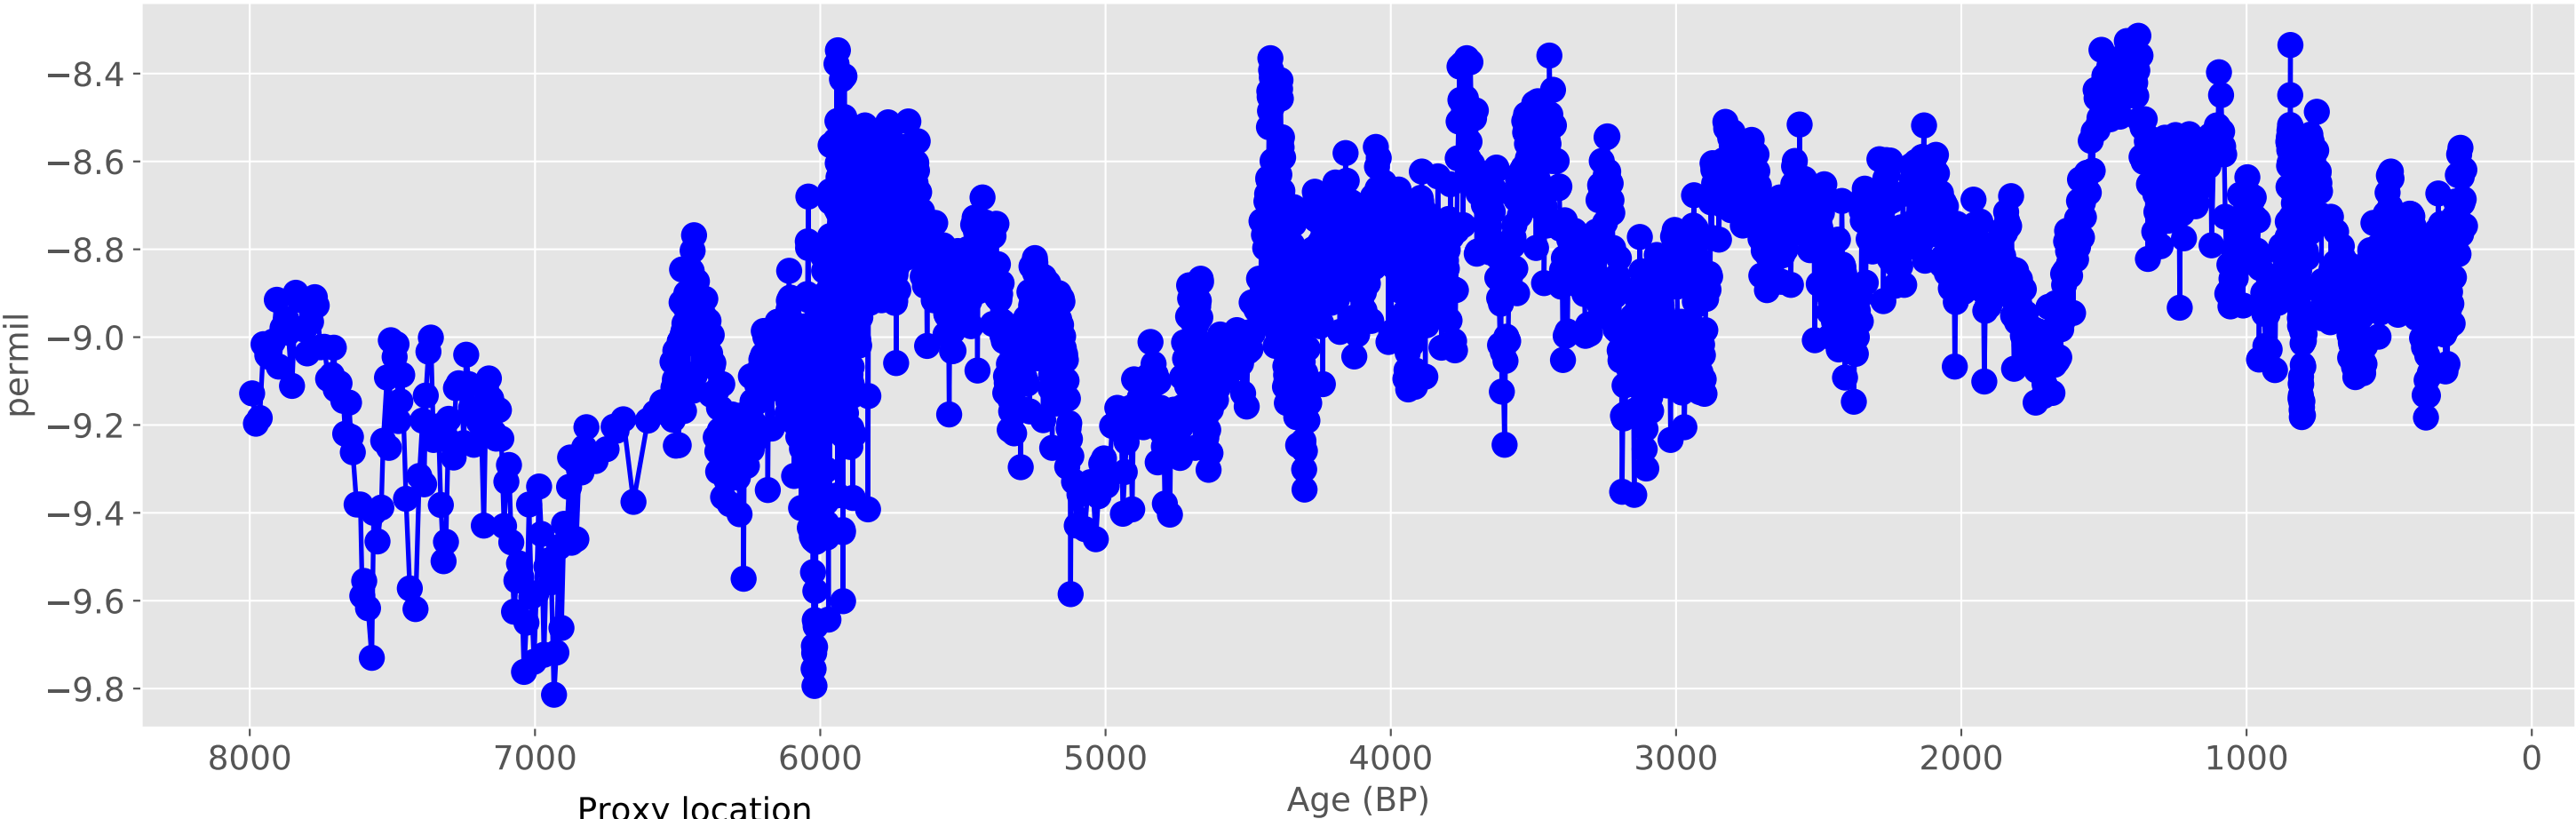

Proxy location  
(42.08 ° N, 123.42 ° W)



|                    |                                                                                              |
|--------------------|----------------------------------------------------------------------------------------------|
| Dataset name:      | OregonCaves.Ersek.2012                                                                       |
| Archive type:      | Speleothem                                                                                   |
| Proxy type:        | d18O                                                                                         |
| Variable name:     | d18O                                                                                         |
| Latitude ( ° N):   | 42.083                                                                                       |
| Longitude ( ° E):  | -123.416                                                                                     |
| Elevation (m):     | 1390.0                                                                                       |
| Interp. variable:  | T                                                                                            |
| Interp. detail:    | air@condensation                                                                             |
| Interp. season:    | winterOnly                                                                                   |
| Interp. direction: | positive                                                                                     |
| Pub. 1 title:      | Holocene winter climate variability in mid-latitude North America                            |
| Pub. 1 authors:    | Ersek, Vasile; Clark, Peter U.; Mix, Alan C.; Chen, Yueshan                                  |
| Pub. 1 year:       | 2012                                                                                         |
| Pub. 1 DOI:        | 10.1038/ncomms2222                                                                           |
| Original data URL: | <a href="http://www.ncdc.noaa.gov/paleo/study/13543">www.ncdc.noaa.gov/paleo/study/13543</a> |

Proxy data and metadata

Speleothem | d18O | Leviathan.Lachniet.2014 | LPD94e74028cc

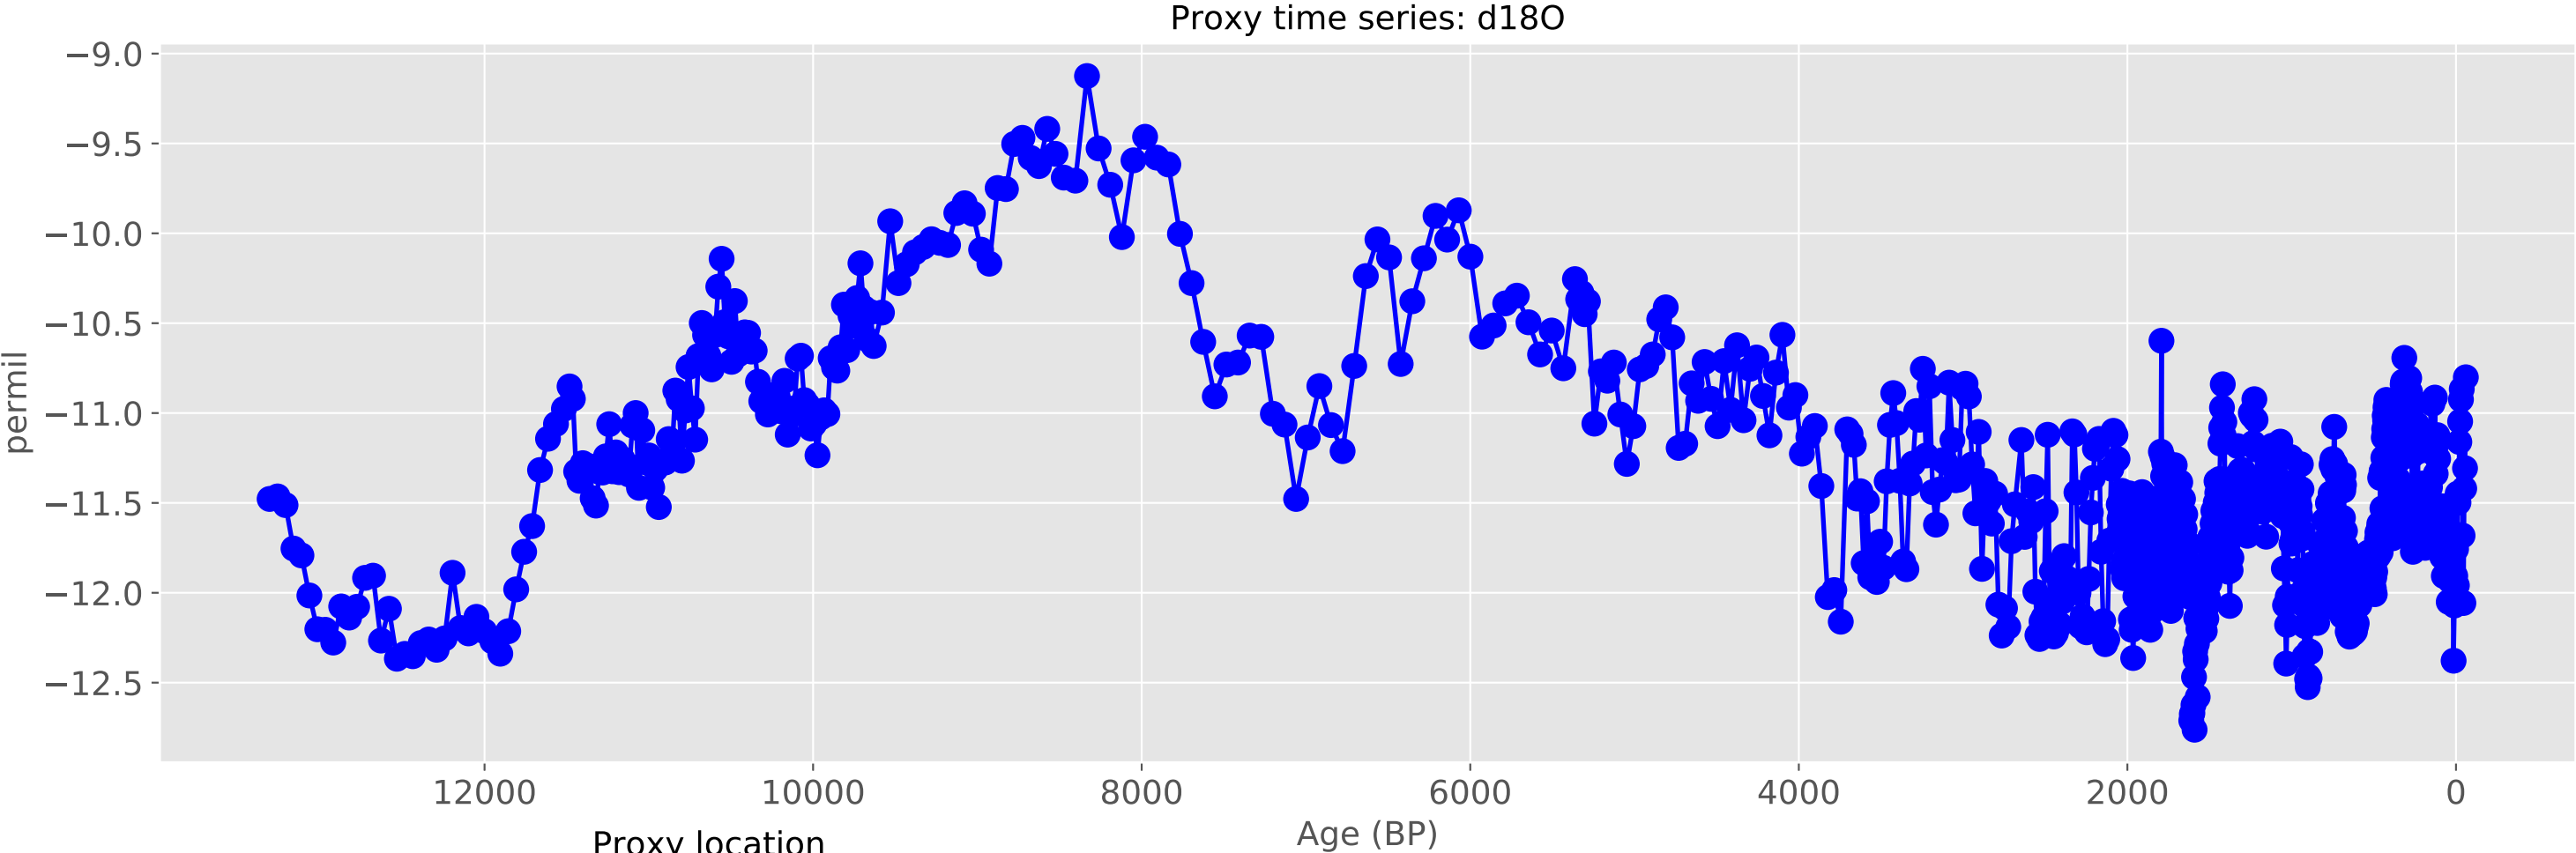

Proxy location  
(37.89 ° N, 115.58 ° W)

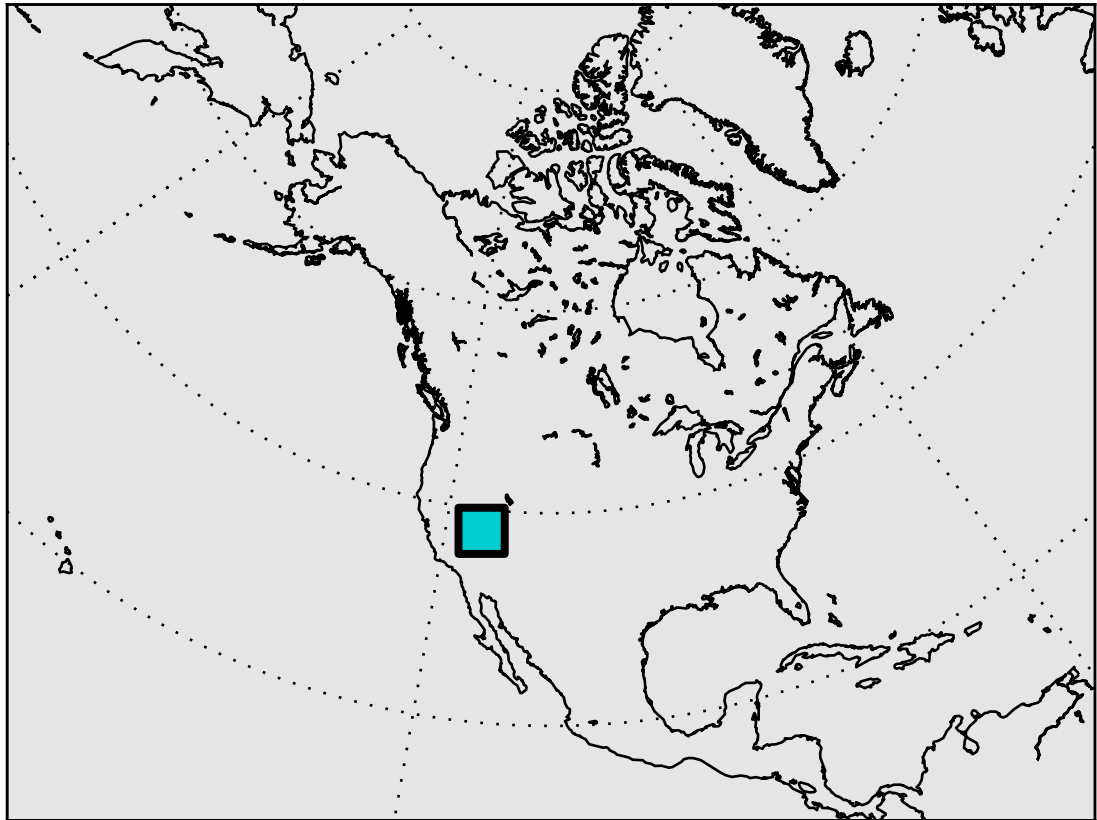

|                    |                                                                                              |
|--------------------|----------------------------------------------------------------------------------------------|
| Dataset name:      | Leviathan.Lachniet.2014                                                                      |
| Archive type:      | Speleothem                                                                                   |
| Proxy type:        | d18O                                                                                         |
| Variable name:     | d18O                                                                                         |
| Latitude ( ° N):   | 37.89                                                                                        |
| Longitude ( ° E):  | -115.58                                                                                      |
| Elevation (m):     | 2400.0                                                                                       |
| Interp. variable:  | T                                                                                            |
| Interp. detail:    | air@surface                                                                                  |
| Interp. season:    | annual                                                                                       |
| Interp. direction: | positive                                                                                     |
| Pub. 1 title:      | Orbital control of western North America atmospher...                                        |
| Pub. 1 authors:    | Lachniet, Matthew S.; Denniston, Rhawn F.; Asmerom...                                        |
| Pub. 1 year:       | 2014                                                                                         |
| Pub. 1 DOI:        | 10.1038/ncomms4805                                                                           |
| Original data URL: | <a href="http://www.ncdc.noaa.gov/paleo/study/16517">www.ncdc.noaa.gov/paleo/study/16517</a> |

Proxy data and metadata  
Speleothem | d18O | PinkPanther.Asmerom.2007 | GHb921673d

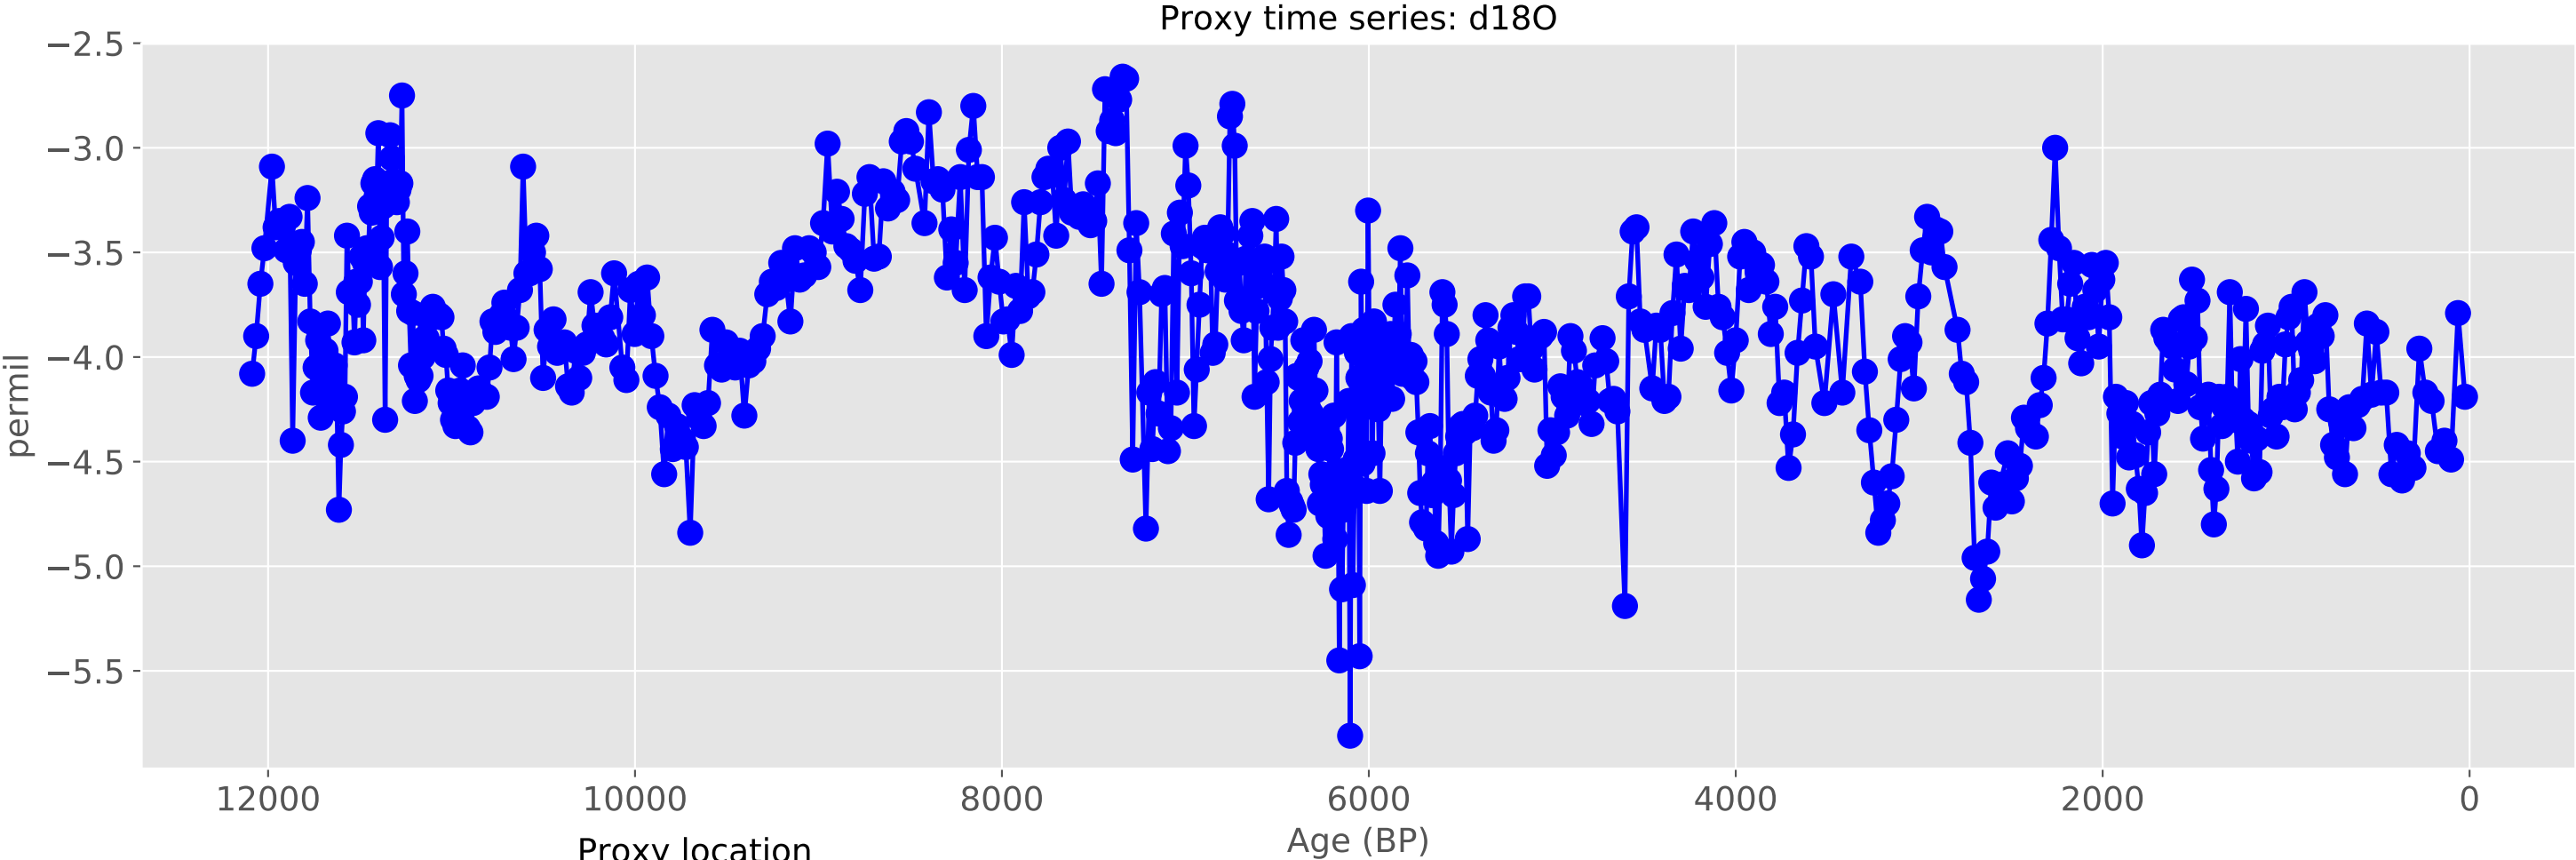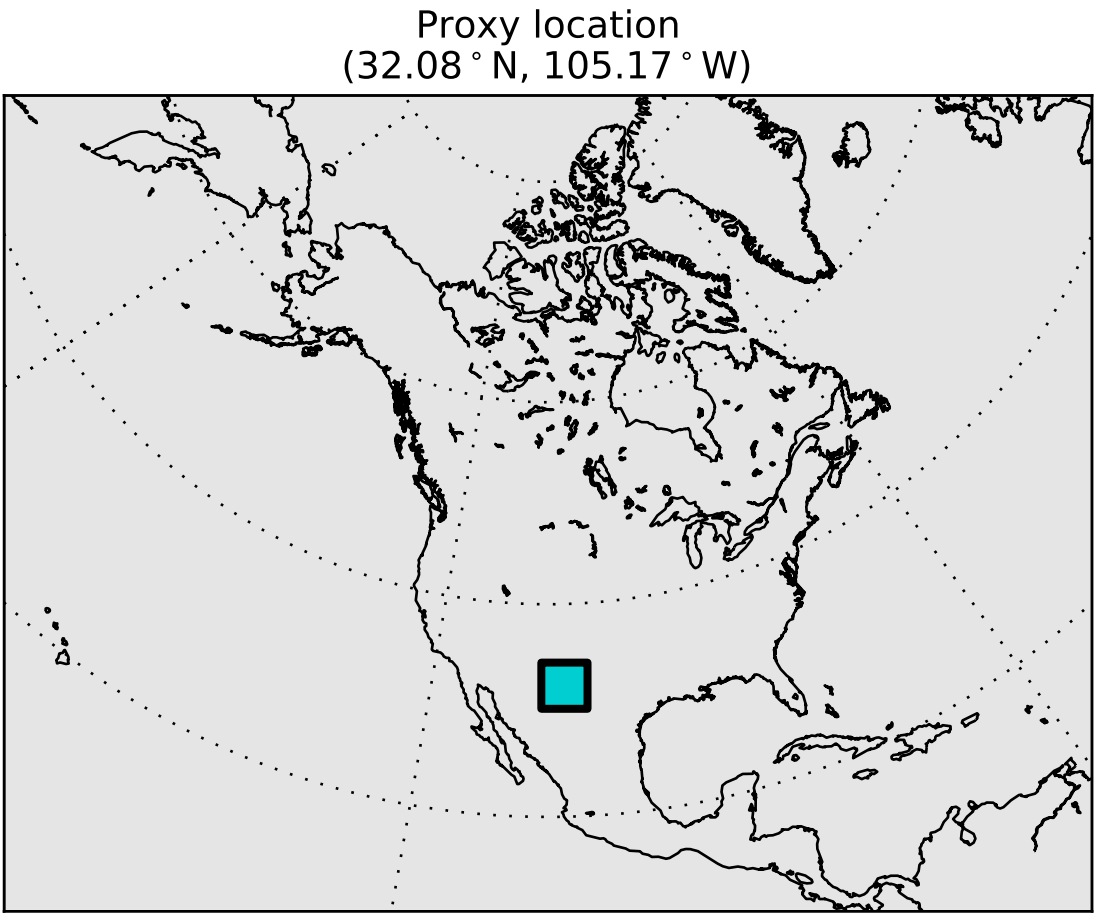

|                    |                                                                                            |
|--------------------|--------------------------------------------------------------------------------------------|
| Dataset name:      | PinkPanther.Asmerom.2007                                                                   |
| Archive type:      | Speleothem                                                                                 |
| Proxy type:        | d18O                                                                                       |
| Variable name:     | d18O                                                                                       |
| Latitude ( ° N):   | 32.083                                                                                     |
| Longitude ( ° E):  | -105.167                                                                                   |
| Elevation (m):     | 1245.0                                                                                     |
| Interp. variable:  | P                                                                                          |
| Interp. detail:    | amount@surface                                                                             |
| Interp. season:    | annual                                                                                     |
| Interp. direction: | negative                                                                                   |
| Pub. 1 title:      | Solar forcing of Holocene climate: New insights fr...                                      |
| Pub. 1 authors:    | Asmerom, Yemane;Polyak, Victor;Burns, Stephen;Rass...                                      |
| Pub. 1 year:       | 2007                                                                                       |
| Pub. 1 DOI:        | 10.1130/G22865A.1                                                                          |
| Original data URL: | <a href="http://www.ncdc.noaa.gov/paleo/study/9739">www.ncdc.noaa.gov/paleo/study/9739</a> |



Proxy data and metadata

Speleothem | d18O | CuevaDiablo.Bernal.2011 | LPDe54dc6d7dp

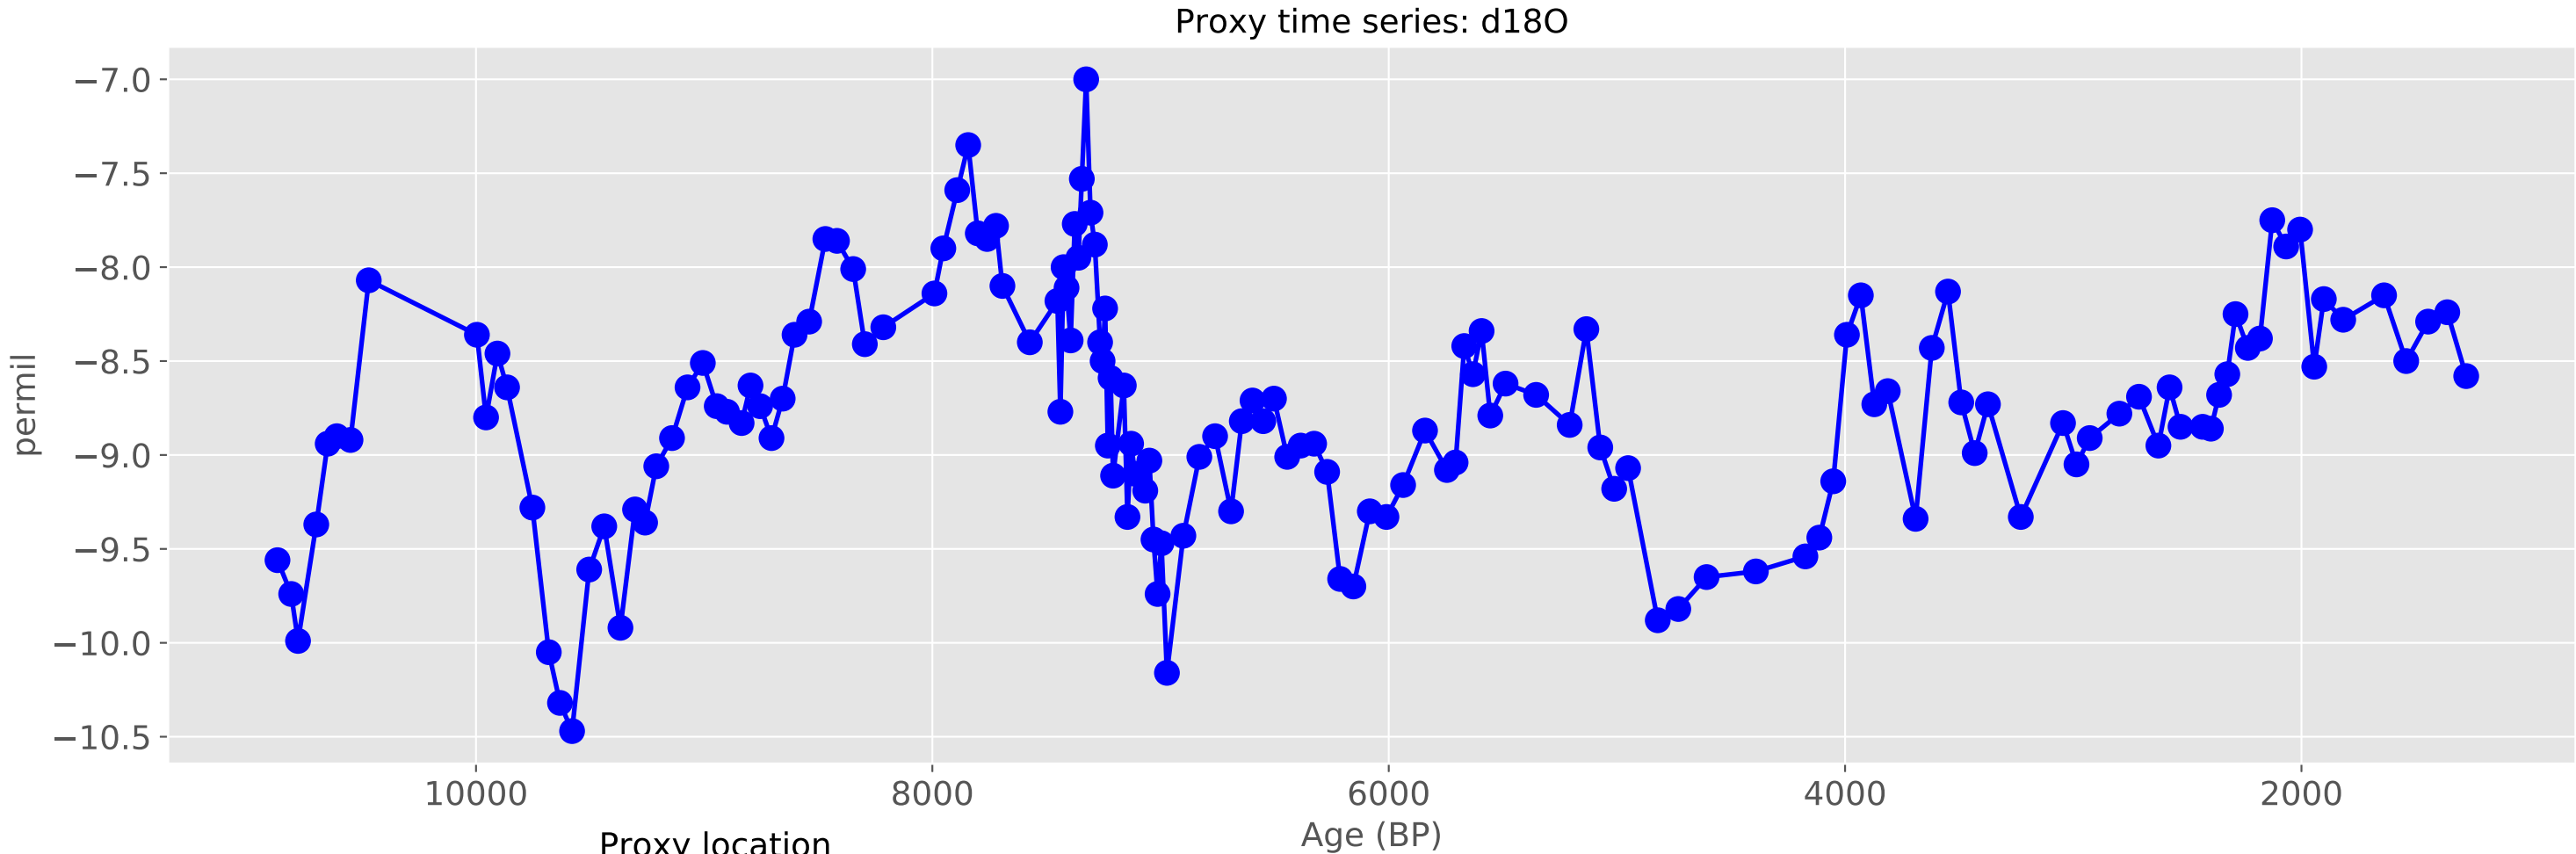

Proxy location  
(18.18 ° N, 99.92 ° W)

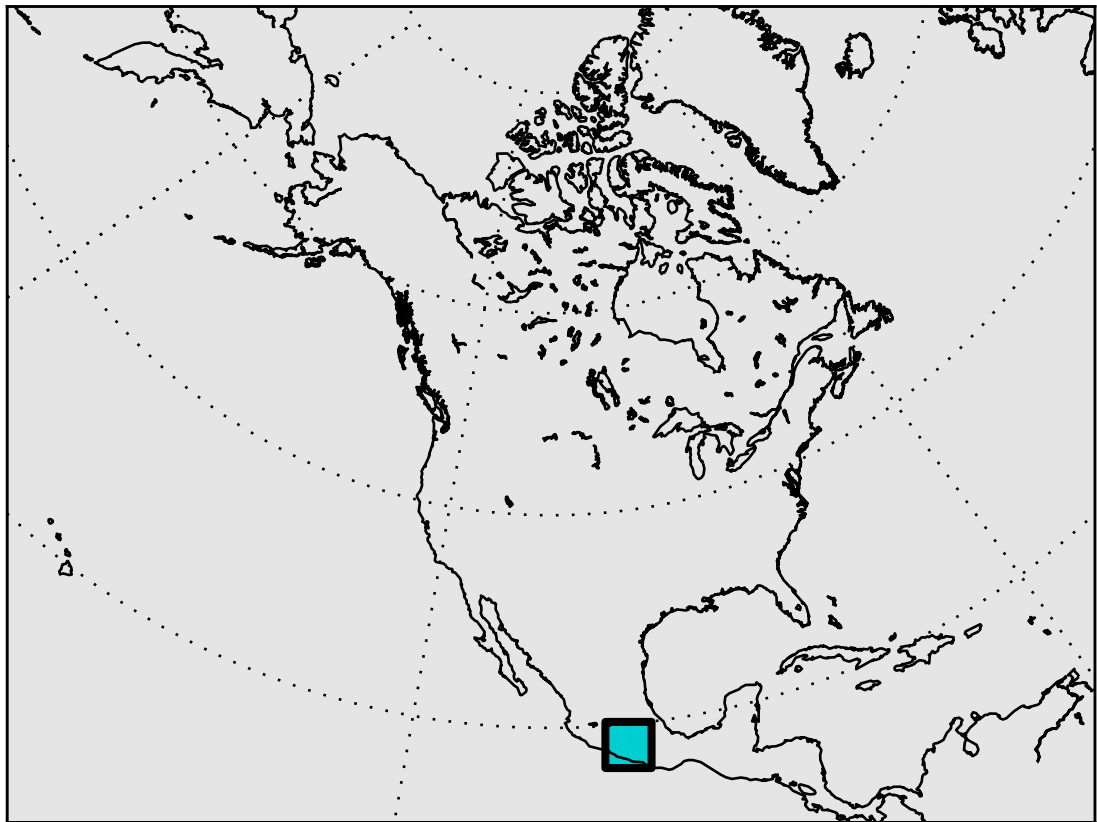

|                    |                                                                                              |
|--------------------|----------------------------------------------------------------------------------------------|
| Dataset name:      | CuevaDiablo.Bernal.2011                                                                      |
| Archive type:      | Speleothem                                                                                   |
| Proxy type:        | d18O                                                                                         |
| Variable name:     | d18O                                                                                         |
| Latitude ( ° N):   | 18.18                                                                                        |
| Longitude ( ° E):  | -99.92                                                                                       |
| Elevation (m):     | 1030.0                                                                                       |
| Interp. variable:  | P                                                                                            |
| Interp. detail:    | amount@surface                                                                               |
| Interp. season:    | annual                                                                                       |
| Interp. direction: | negative                                                                                     |
| Pub. 1 title:      | A speleothem record of Holocene climate variabilit...                                        |
| Pub. 1 authors:    | Bernal, Juan Pablo;Lachniet, Matthew;McCulloch, Ma...                                        |
| Pub. 1 year:       | 2011                                                                                         |
| Pub. 1 DOI:        | 10.1016/j.yqres.2010.09.002                                                                  |
| Original data URL: | <a href="http://www.ncdc.noaa.gov/paleo/study/10670">www.ncdc.noaa.gov/paleo/study/10670</a> |

Proxy data and metadata  
Speleothem | d18O | Macal.Akers.2016 | WEB67e3006e

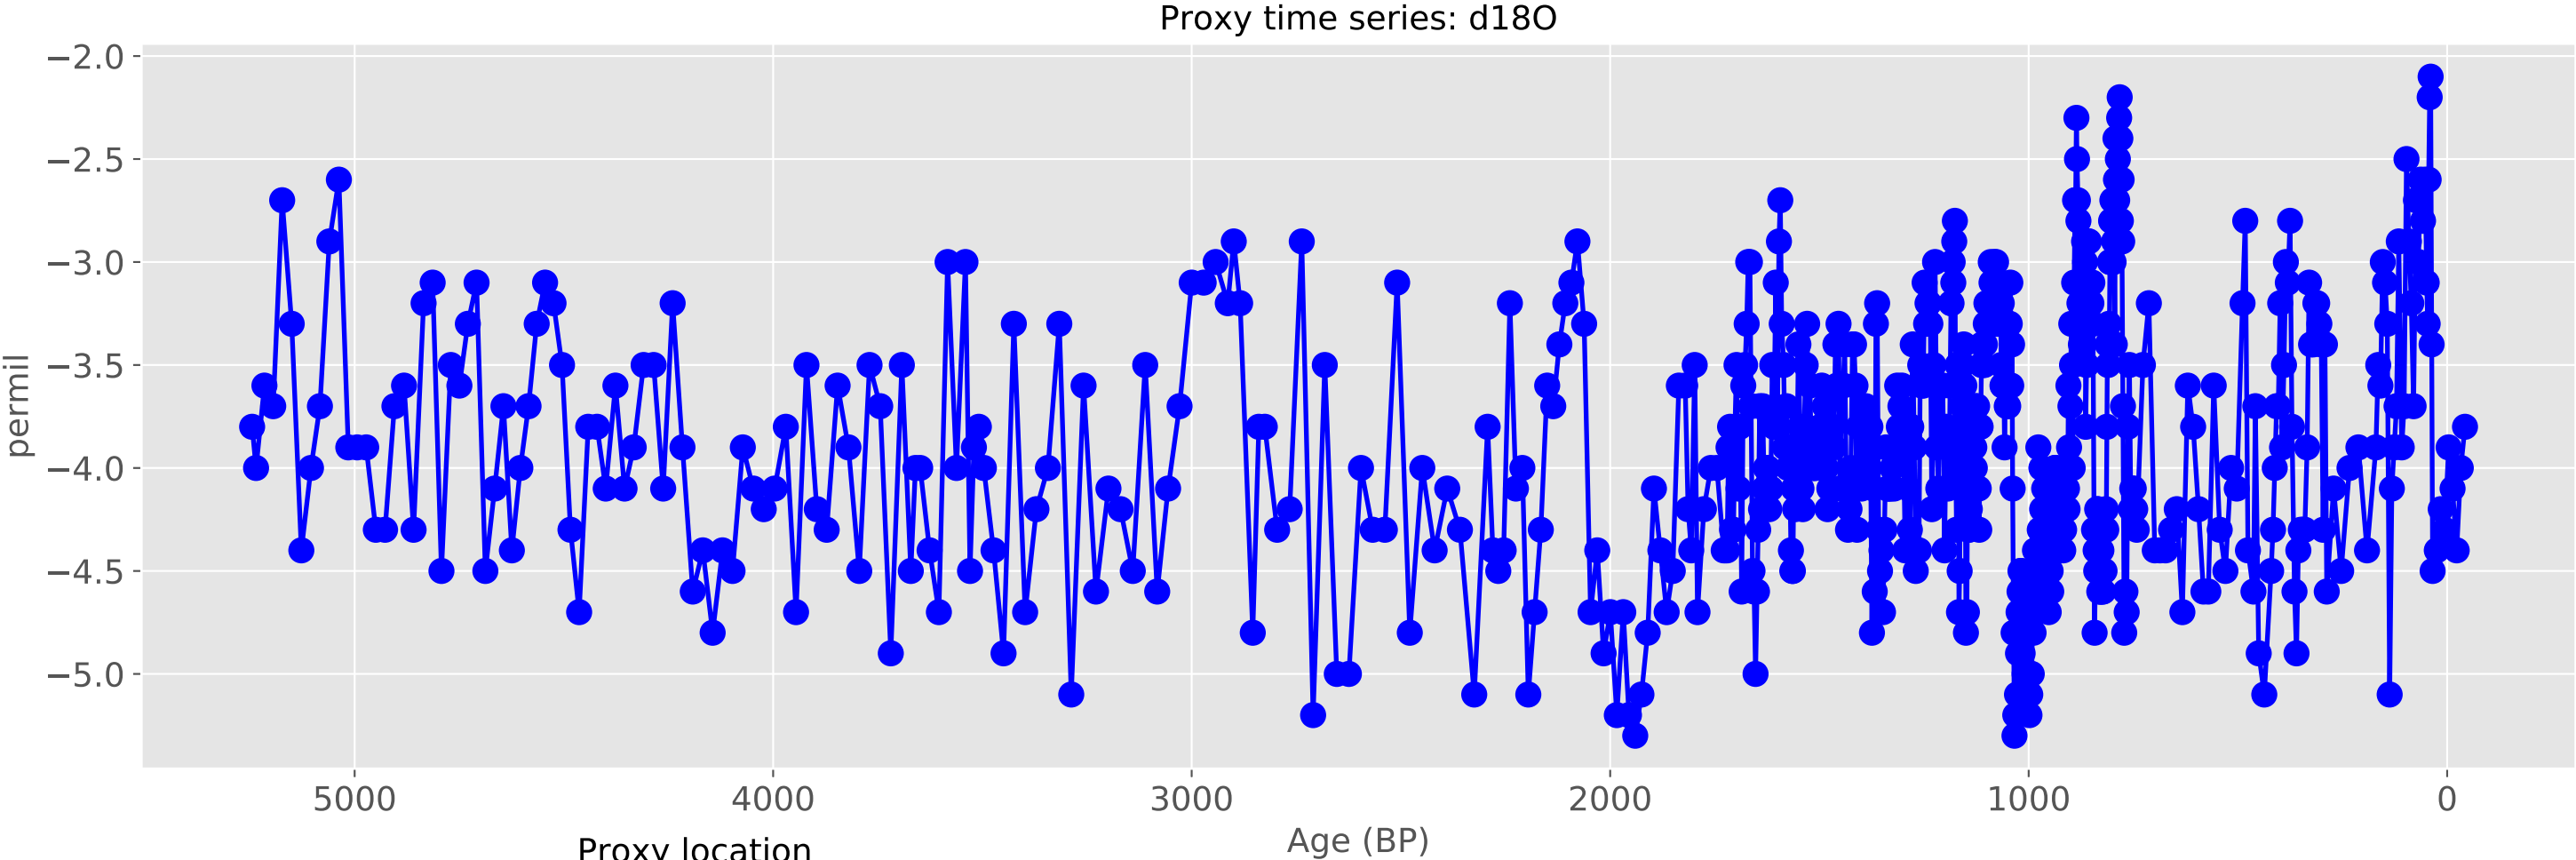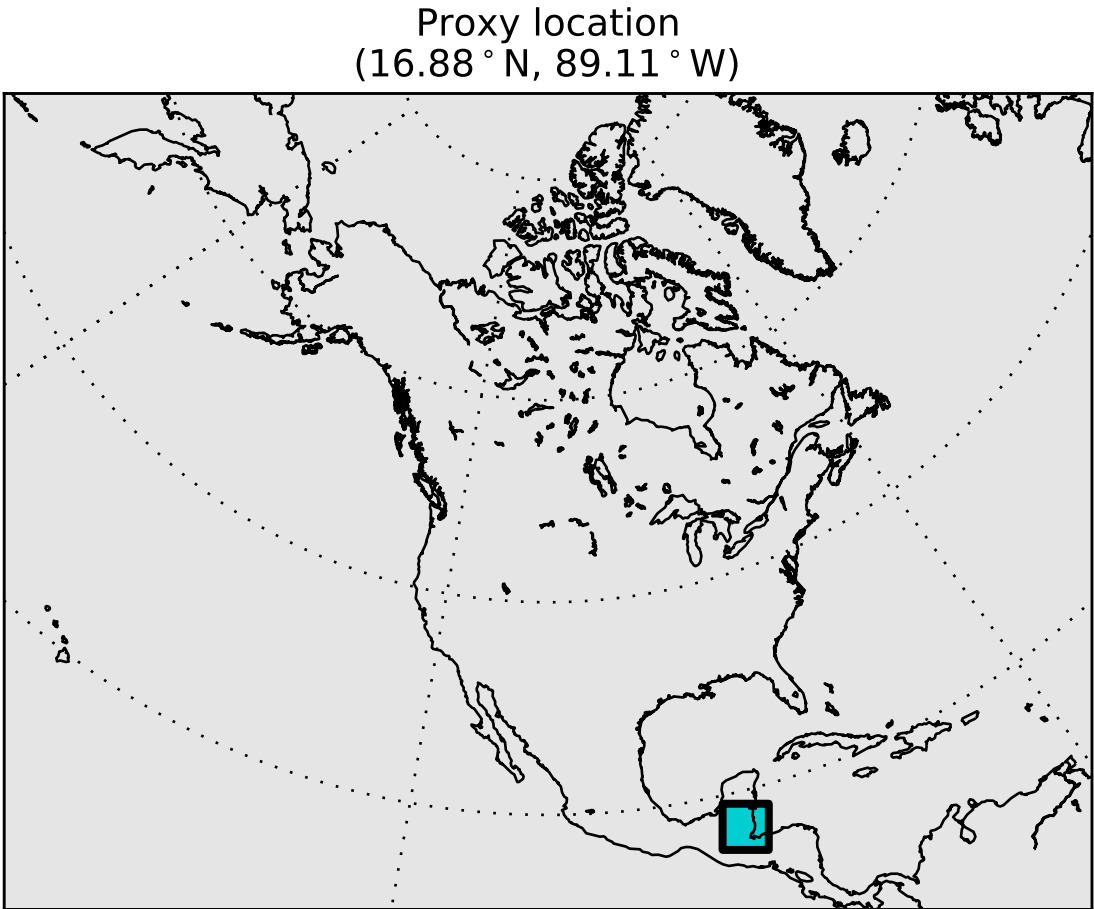

|                    |                                                       |
|--------------------|-------------------------------------------------------|
| Dataset name:      | Macal.Akers.2016                                      |
| Archive type:      | Speleothem                                            |
| Proxy type:        | d18O                                                  |
| Variable name:     | d18O                                                  |
| Latitude (° N):    | 16.883                                                |
| Longitude (° E):   | -89.108                                               |
| Elevation (m):     | 530.0                                                 |
| Interp. variable:  | P                                                     |
| Interp. detail:    | amount@surface                                        |
| Interp. season:    | annual                                                |
| Interp. direction: | negative                                              |
| Pub. 1 title:      | An extended and higher-resolution record of climat... |
| Pub. 1 authors:    | Akers, Pete D.                                        |
| Pub. 1 year:       | 2016                                                  |
| Pub. 1 DOI:        | 10.1016/j.palaeo.2016.07.007                          |
| Original data URL: | www.ncdc.noaa.gov/paleo/study/20506                   |

Proxy data and metadata

Speleothem | d18O | Grutas.Winter.2020 | WEB58395a2f

Proxy time series: d18O

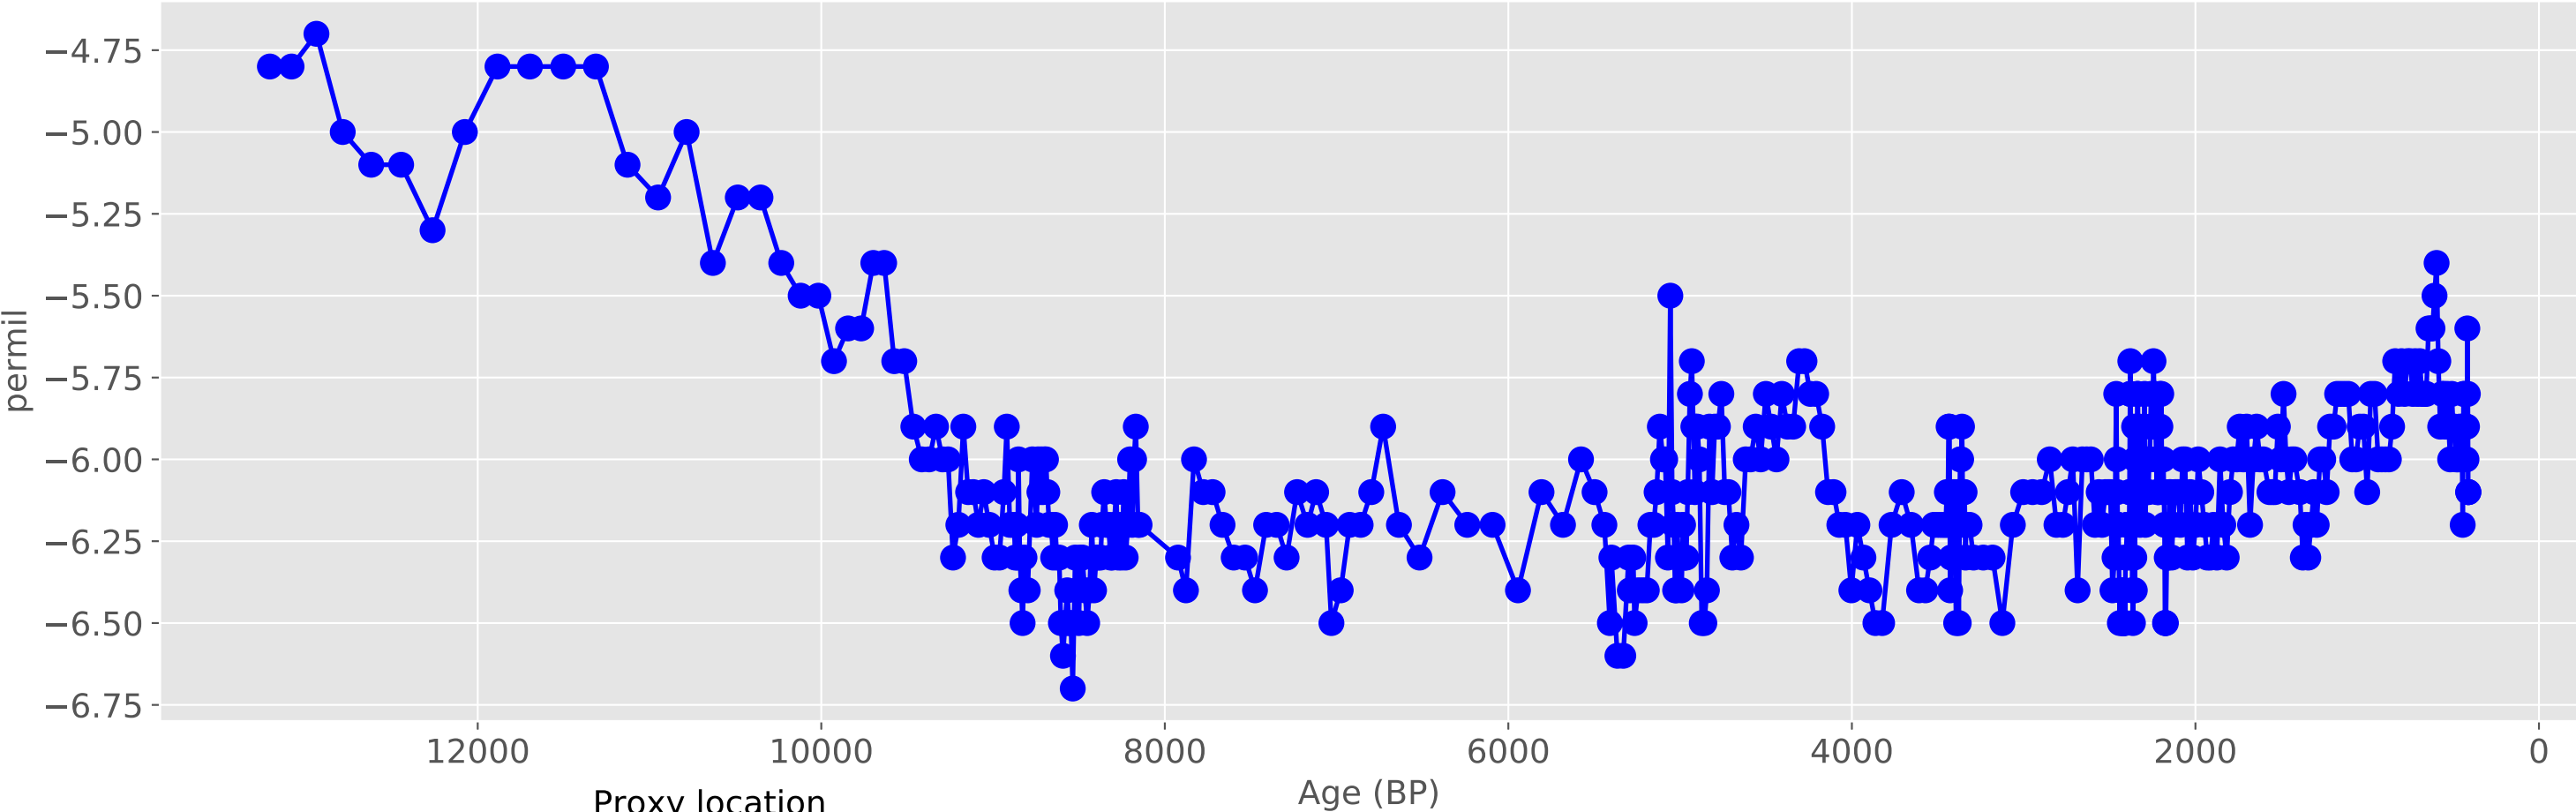

Proxy location  
(15.43 ° N, 90.28 ° W)

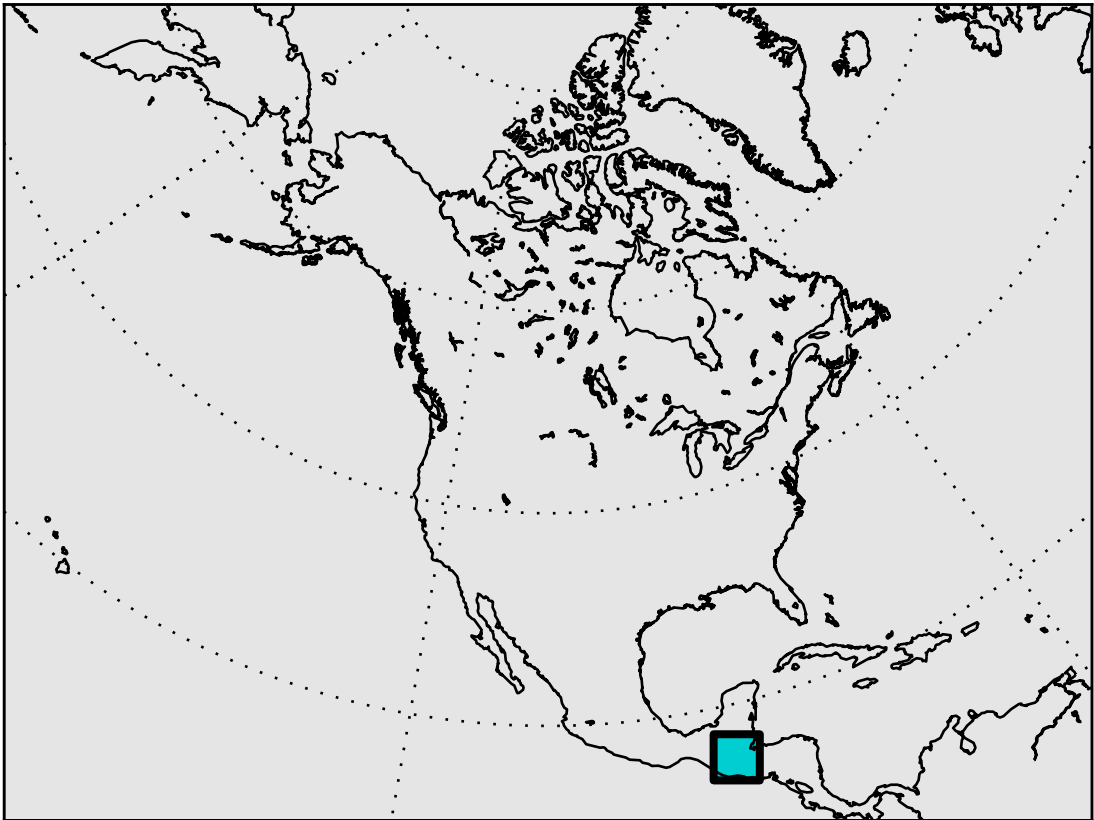

|                    |                                                                                              |
|--------------------|----------------------------------------------------------------------------------------------|
| Dataset name:      | Grutas.Winter.2020                                                                           |
| Archive type:      | Speleothem                                                                                   |
| Proxy type:        | d18O                                                                                         |
| Variable name:     | d18O                                                                                         |
| Latitude ( ° N):   | 15.4277                                                                                      |
| Longitude ( ° E):  | -90.2807                                                                                     |
| Elevation (m):     | 1466.0                                                                                       |
| Interp. variable:  | P                                                                                            |
| Interp. detail:    | amount@surface                                                                               |
| Interp. season:    | annual                                                                                       |
| Interp. direction: | negative                                                                                     |
| Pub. 1 title:      | Initiation of a stable convective hydroclimatic re...                                        |
| Pub. 1 authors:    | Winter, Amos;Zanchettin, Davide;Lachniet, Matthew;...                                        |
| Pub. 1 year:       | 2020                                                                                         |
| Pub. 1 DOI:        | 10.1038/s41467-020-14490-y                                                                   |
| Original data URL: | <a href="http://www.ncdc.noaa.gov/paleo/study/28351">www.ncdc.noaa.gov/paleo/study/28351</a> |

Proxy data and metadata

Speleothem | Mg/Ca | LehmanCaves.Steponaitis.2015 | WEB753b9479

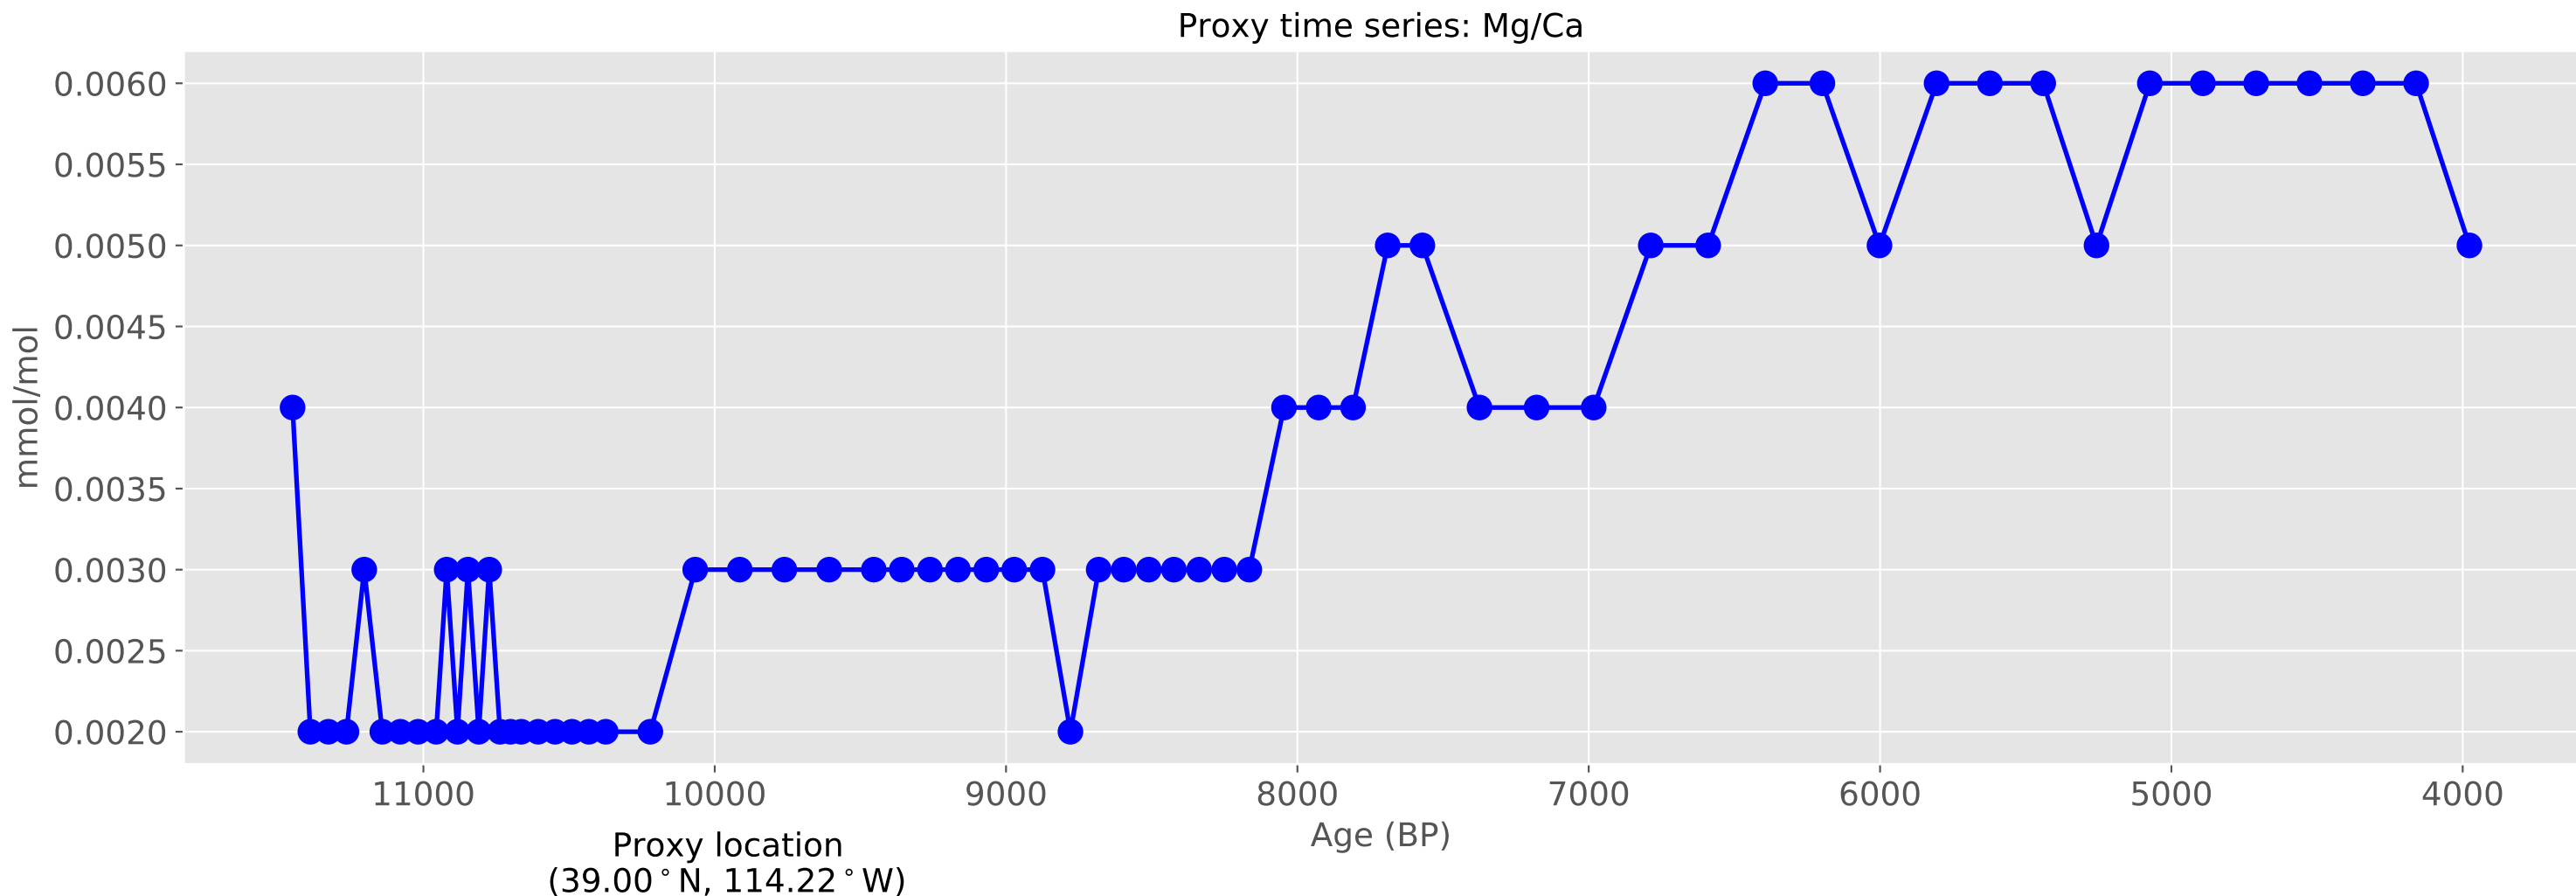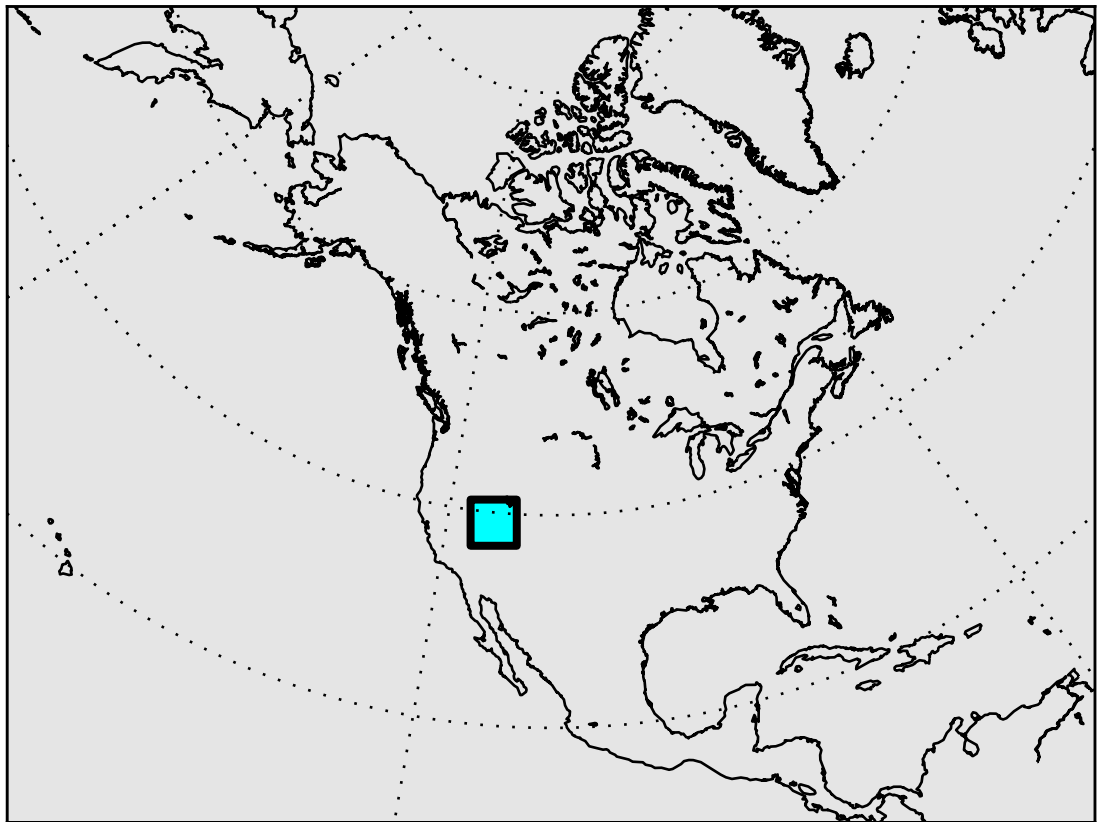

|                    |                                                                                              |
|--------------------|----------------------------------------------------------------------------------------------|
| Dataset name:      | LehmanCaves.Steponaitis.2015                                                                 |
| Archive type:      | Speleothem                                                                                   |
| Proxy type:        | Mg/Ca                                                                                        |
| Variable name:     | Mg/Ca                                                                                        |
| Latitude ( ° N):   | 39.0006                                                                                      |
| Longitude ( ° E):  | -114.2203                                                                                    |
| Elevation (m):     | 2130.0                                                                                       |
| Interp. variable:  | P-E                                                                                          |
| Interp. detail:    | infiltration                                                                                 |
| Interp. season:    | winterOnly                                                                                   |
| Interp. direction: | negative                                                                                     |
| Pub. 1 title:      | Mid-Holocene drying of the U.S. Great Basin record...                                        |
| Pub. 1 authors:    | Steponaitis, Elena;Andrews, Alexandra;McGee, David...                                        |
| Pub. 1 year:       | 2015                                                                                         |
| Pub. 1 DOI:        | 10.1016/j.quascirev.2015.04.011                                                              |
| Original data URL: | <a href="http://www.ncdc.noaa.gov/paleo/study/19038">www.ncdc.noaa.gov/paleo/study/19038</a> |

Proxy data and metadata  
Speleothem | reflectance | Macal.Akers.2016 | WEBcac4e435

Proxy time series: reflectance

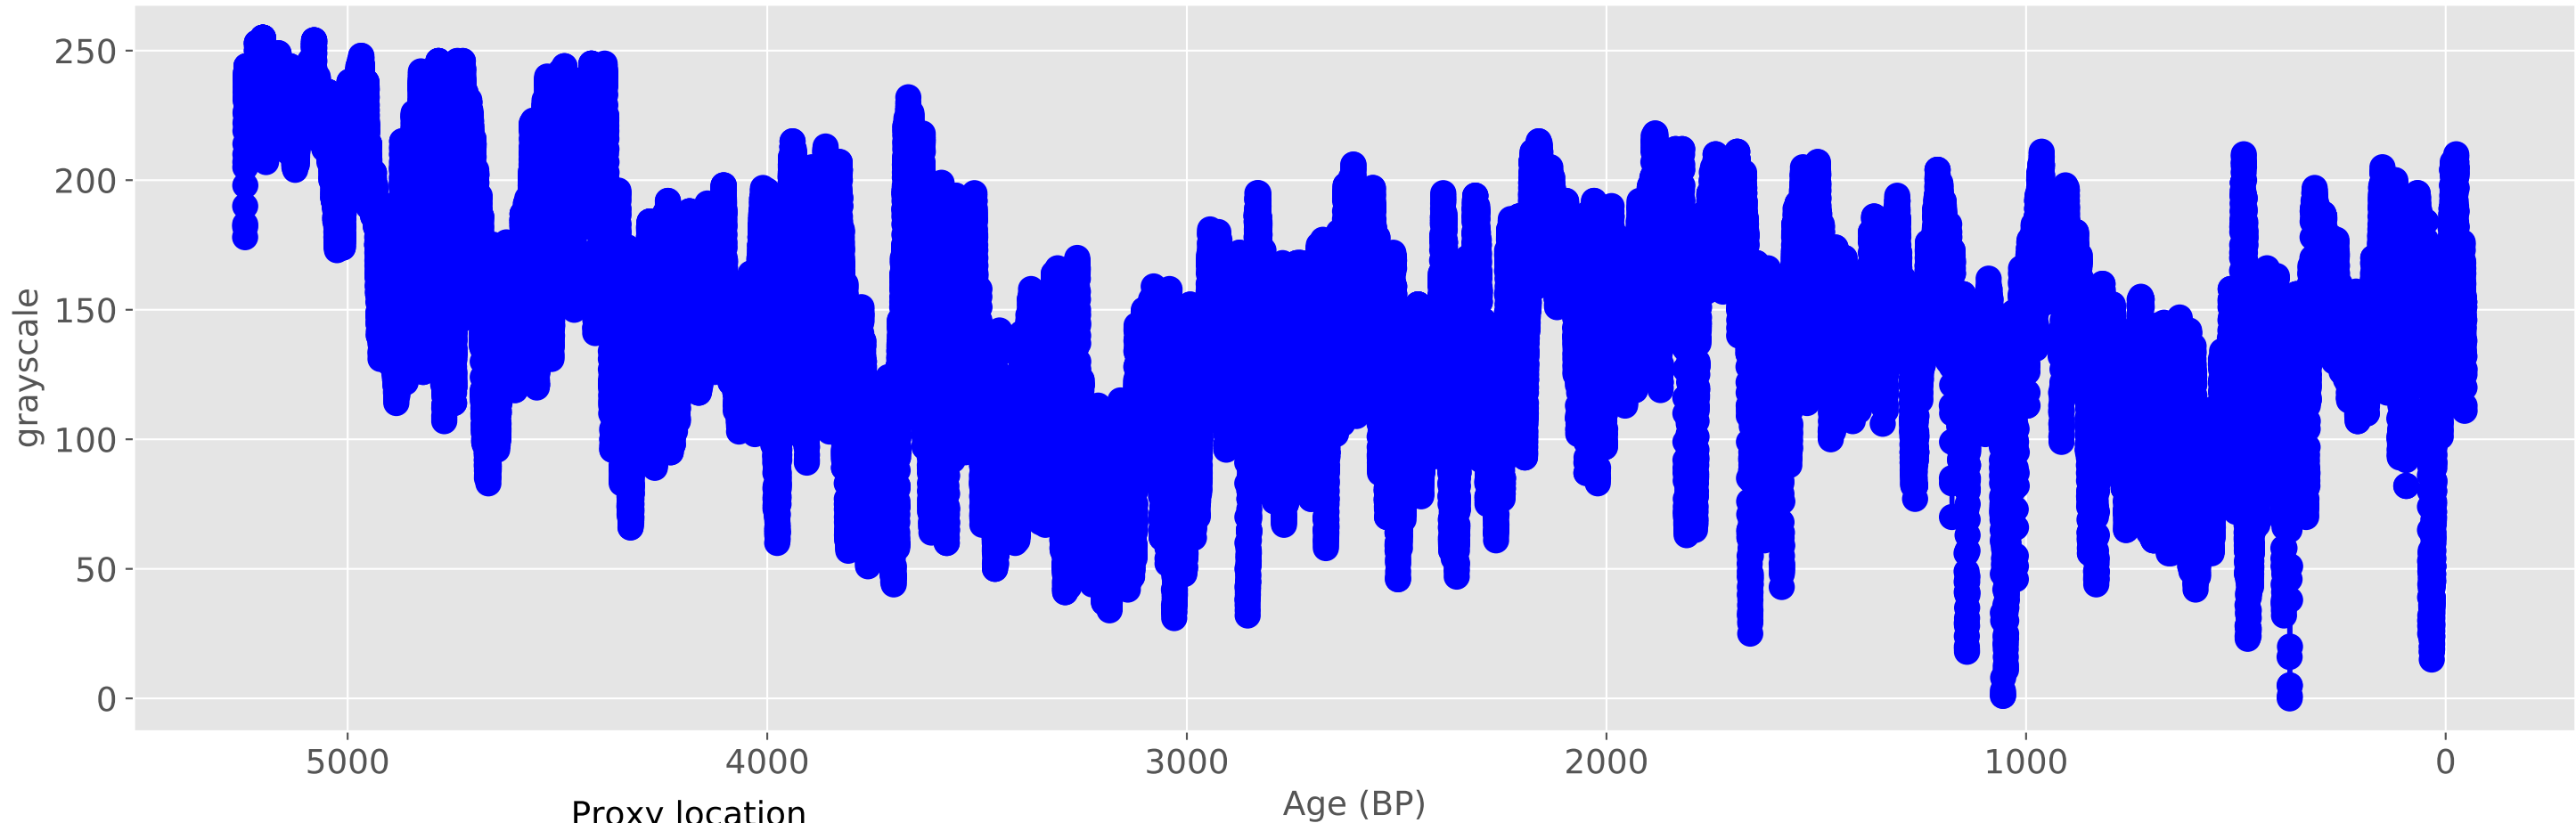

Proxy location  
(16.88° N, 89.11° W)

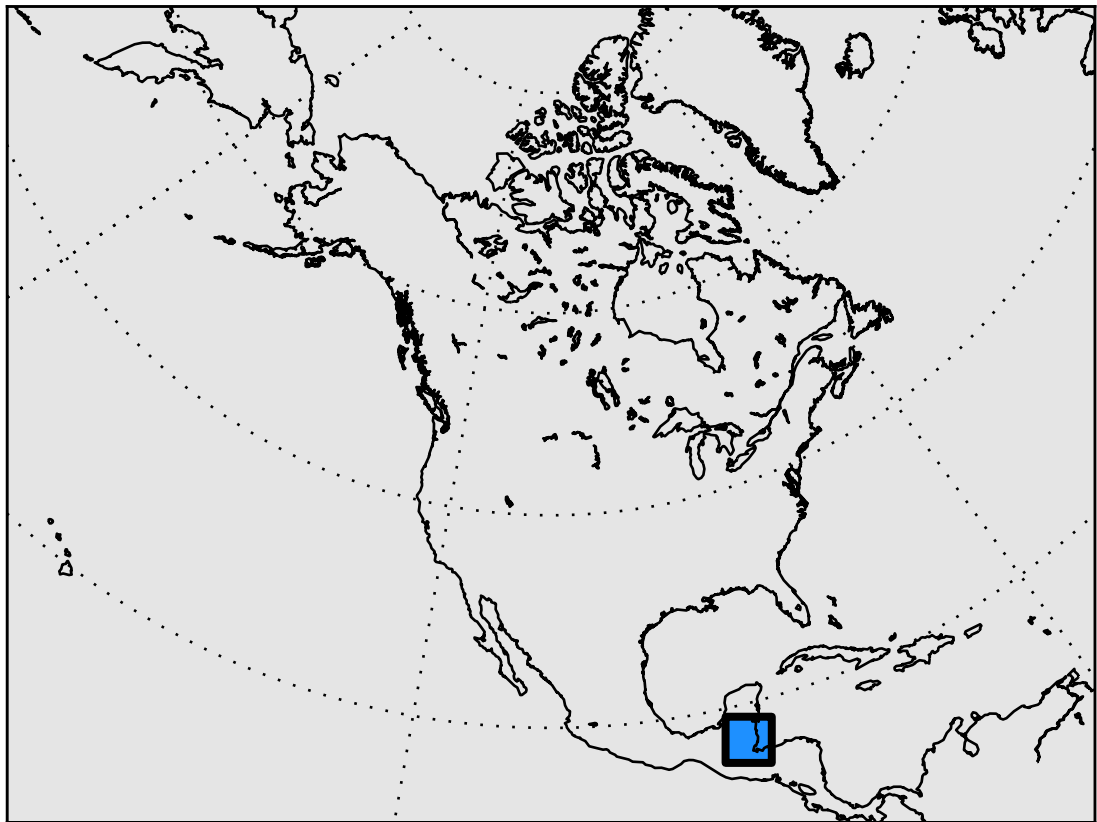

|                    |                                                                                              |
|--------------------|----------------------------------------------------------------------------------------------|
| Dataset name:      | Macal.Akers.2016                                                                             |
| Archive type:      | Speleothem                                                                                   |
| Proxy type:        | reflectance                                                                                  |
| Variable name:     | reflectance                                                                                  |
| Latitude (° N):    | 16.883                                                                                       |
| Longitude (° E):   | -89.108                                                                                      |
| Elevation (m):     | 530.0                                                                                        |
| Interp. variable:  | P-E                                                                                          |
| Interp. detail:    | @surface                                                                                     |
| Interp. season:    | annual                                                                                       |
| Interp. direction: | negative                                                                                     |
| Pub. 1 title:      | An extended and higher-resolution record of climat...                                        |
| Pub. 1 authors:    | Akers, Pete D.                                                                               |
| Pub. 1 year:       | 2016                                                                                         |
| Pub. 1 DOI:        | 10.1016/j.palaeo.2016.07.007                                                                 |
| Original data URL: | <a href="http://www.ncdc.noaa.gov/paleo/study/20506">www.ncdc.noaa.gov/paleo/study/20506</a> |

Proxy data and metadata

Speleothem | Sr | NBJ2015iso.Wong.2015 | WEB02d26251

Proxy time series: Sr

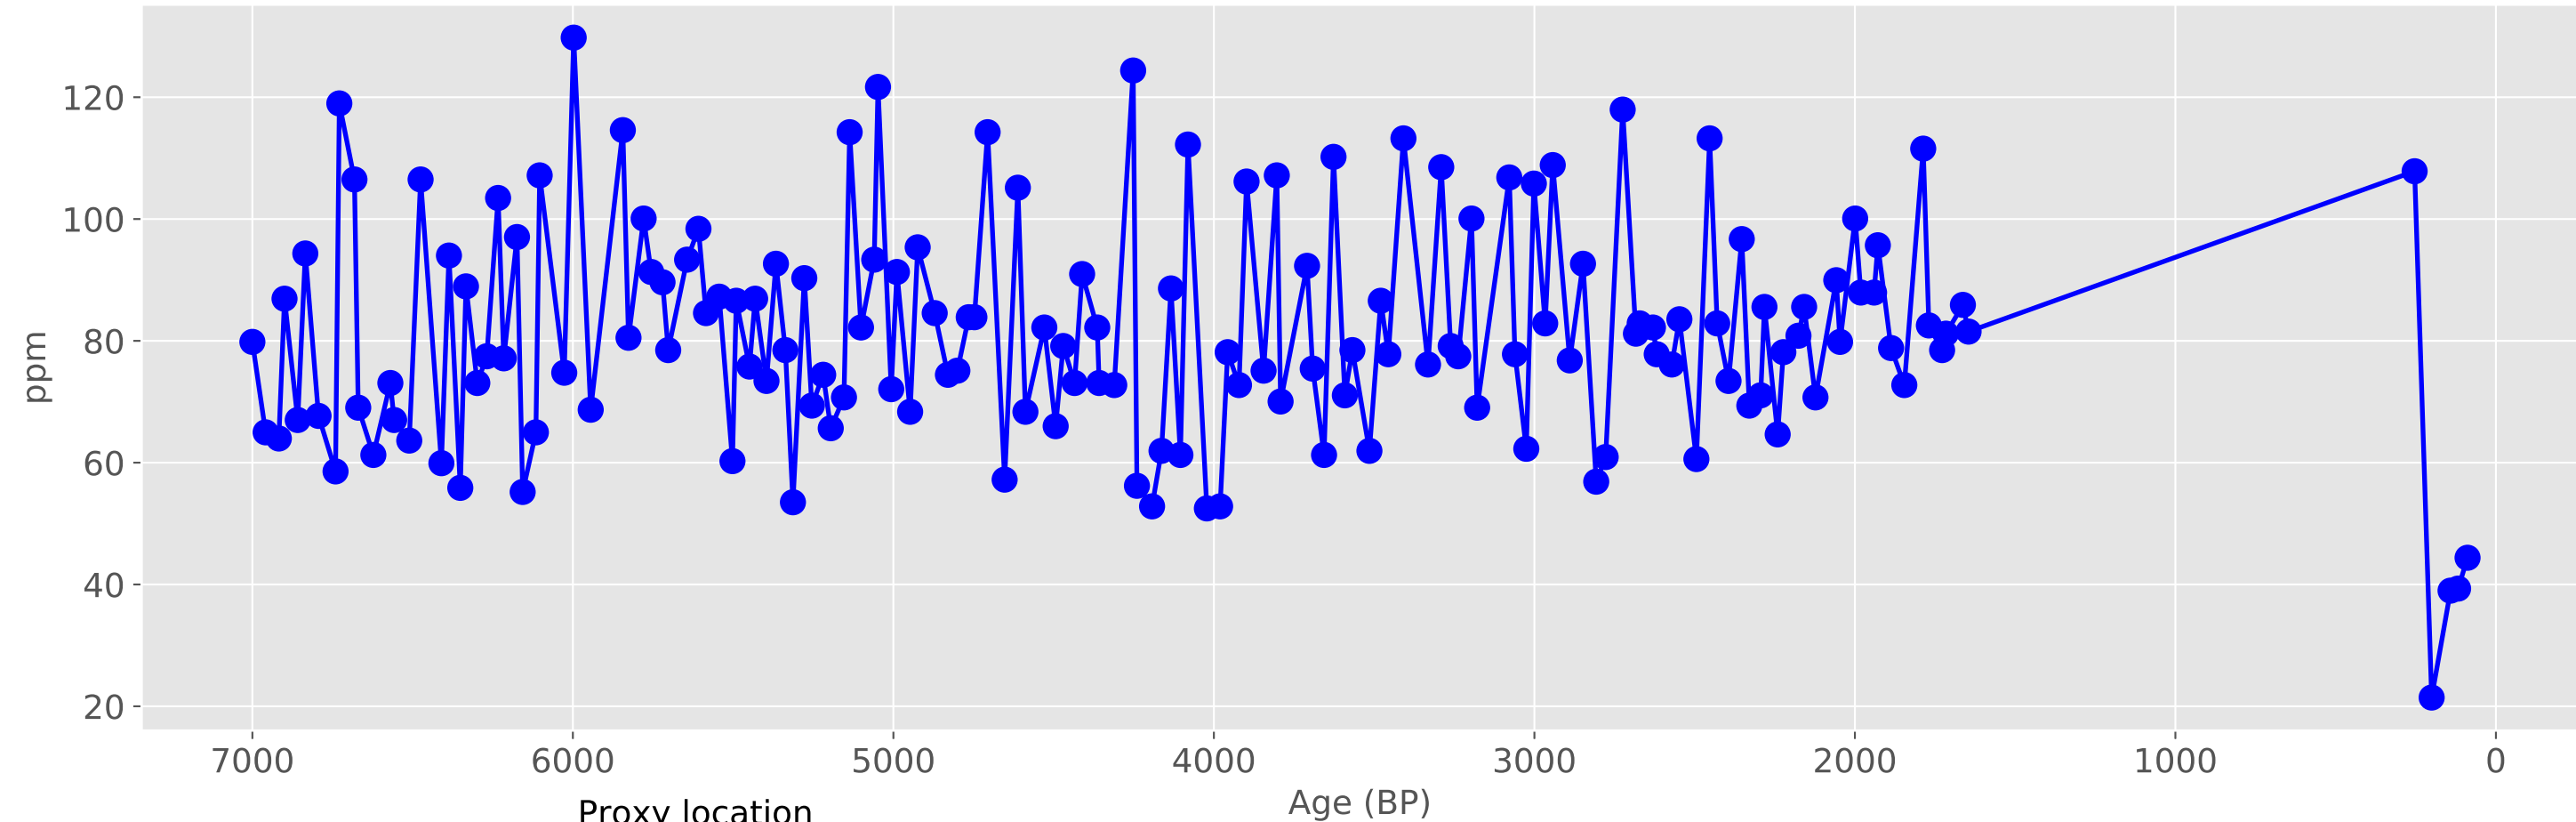

Proxy location  
(29.69 ° N, 98.34 ° W)

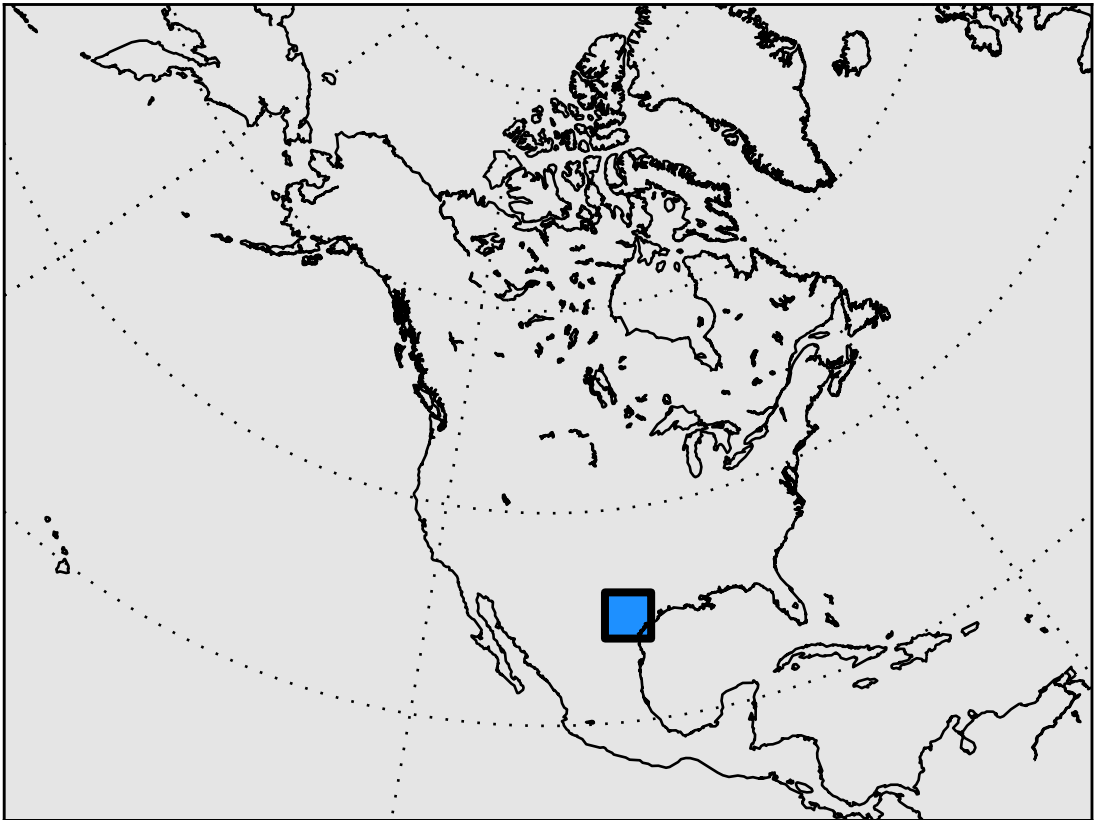

|                    |                                                       |
|--------------------|-------------------------------------------------------|
| Dataset name:      | NBJ2015iso.Wong.2015                                  |
| Archive type:      | Speleothem                                            |
| Proxy type:        | Sr                                                    |
| Variable name:     | Sr                                                    |
| Latitude ( ° N):   | 29.69                                                 |
| Longitude ( ° E):  | -98.34                                                |
| Elevation (m):     | 304.0                                                 |
| Interp. variable:  | P-E                                                   |
| Interp. detail:    | @surface                                              |
| Interp. season:    | annual                                                |
| Interp. direction: | negative                                              |
| Pub. 1 title:      | Holocene climate variability in Texas, USA: An int... |
| Pub. 1 authors:    | Wong, Corinne I.;Banner, Jay L.;Musgrove, MaryLynn    |
| Pub. 1 year:       | 2015                                                  |
| Pub. 1 DOI:        | 10.1016/j.quascirev.2015.06.023                       |
| Original data URL: | wNAm                                                  |



Proxy data and metadata  
Wood | TRW | GreatBasin.Salzer.2014 | LPD8d84bf64

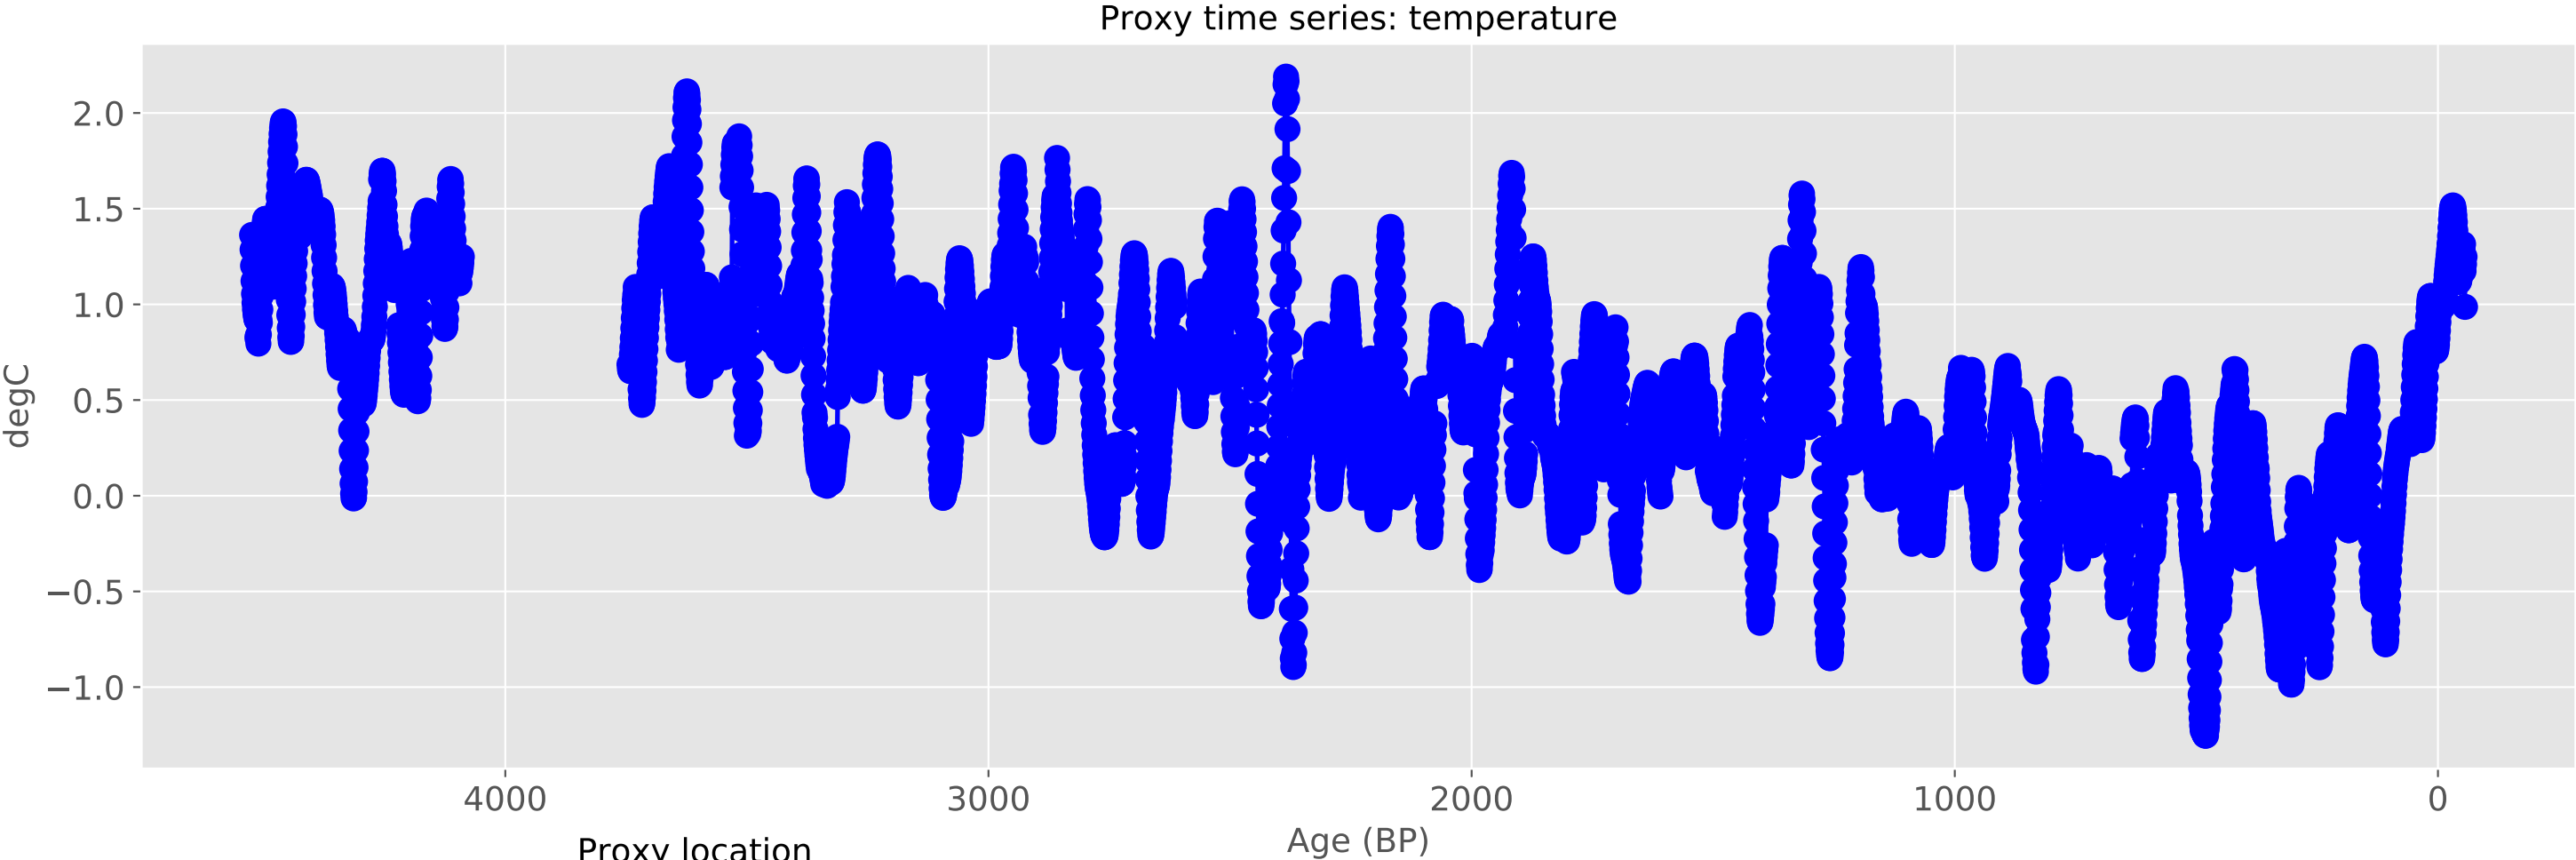

Proxy location  
(38.00 ° N, 116.50 ° W)

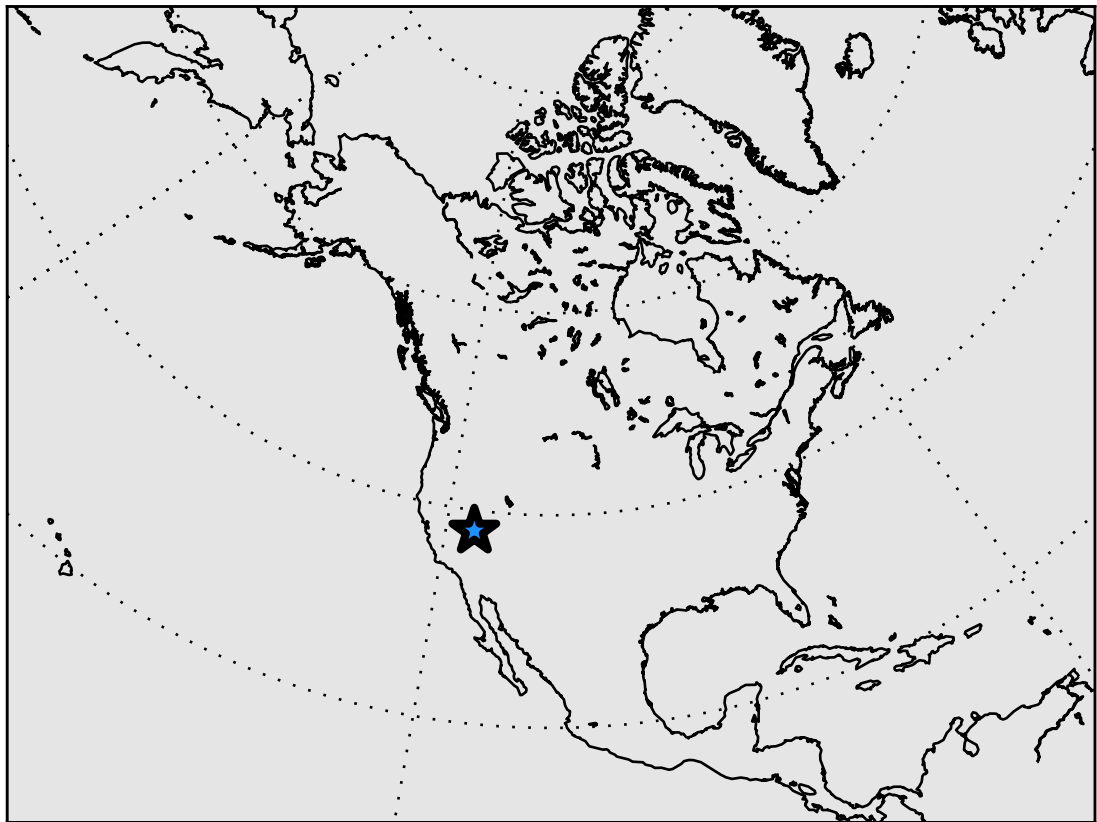

|                    |                                                                                              |
|--------------------|----------------------------------------------------------------------------------------------|
| Dataset name:      | GreatBasin.Salzer.2014                                                                       |
| Archive type:      | Wood                                                                                         |
| Proxy type:        | TRW                                                                                          |
| Variable name:     | temperature                                                                                  |
| Latitude ( ° N):   | 38.0                                                                                         |
| Longitude ( ° E):  | -116.5                                                                                       |
| Elevation (m):     | 0.0                                                                                          |
| Interp. variable:  | T                                                                                            |
| Interp. detail:    | air@surface                                                                                  |
| Interp. season:    | summer+                                                                                      |
| Interp. direction: | positive                                                                                     |
| Pub. 1 title:      | Five millennia of paleotemperature from tree-rings...                                        |
| Pub. 1 authors:    | Salzer, Matthew W.; Bunn, Andrew G.; Graham, Nicho...                                        |
| Pub. 1 year:       | 2014                                                                                         |
| Pub. 1 DOI:        | 10.1007/s00382-013-1911-9                                                                    |
| Original data URL: | <a href="http://www.ncdc.noaa.gov/paleo/study/17056">www.ncdc.noaa.gov/paleo/study/17056</a> |

Proxy data and metadata

Wood | TRW | NevadaPrecip.Hughes.1996 | WEB75eec6a6

Proxy time series: precipitation

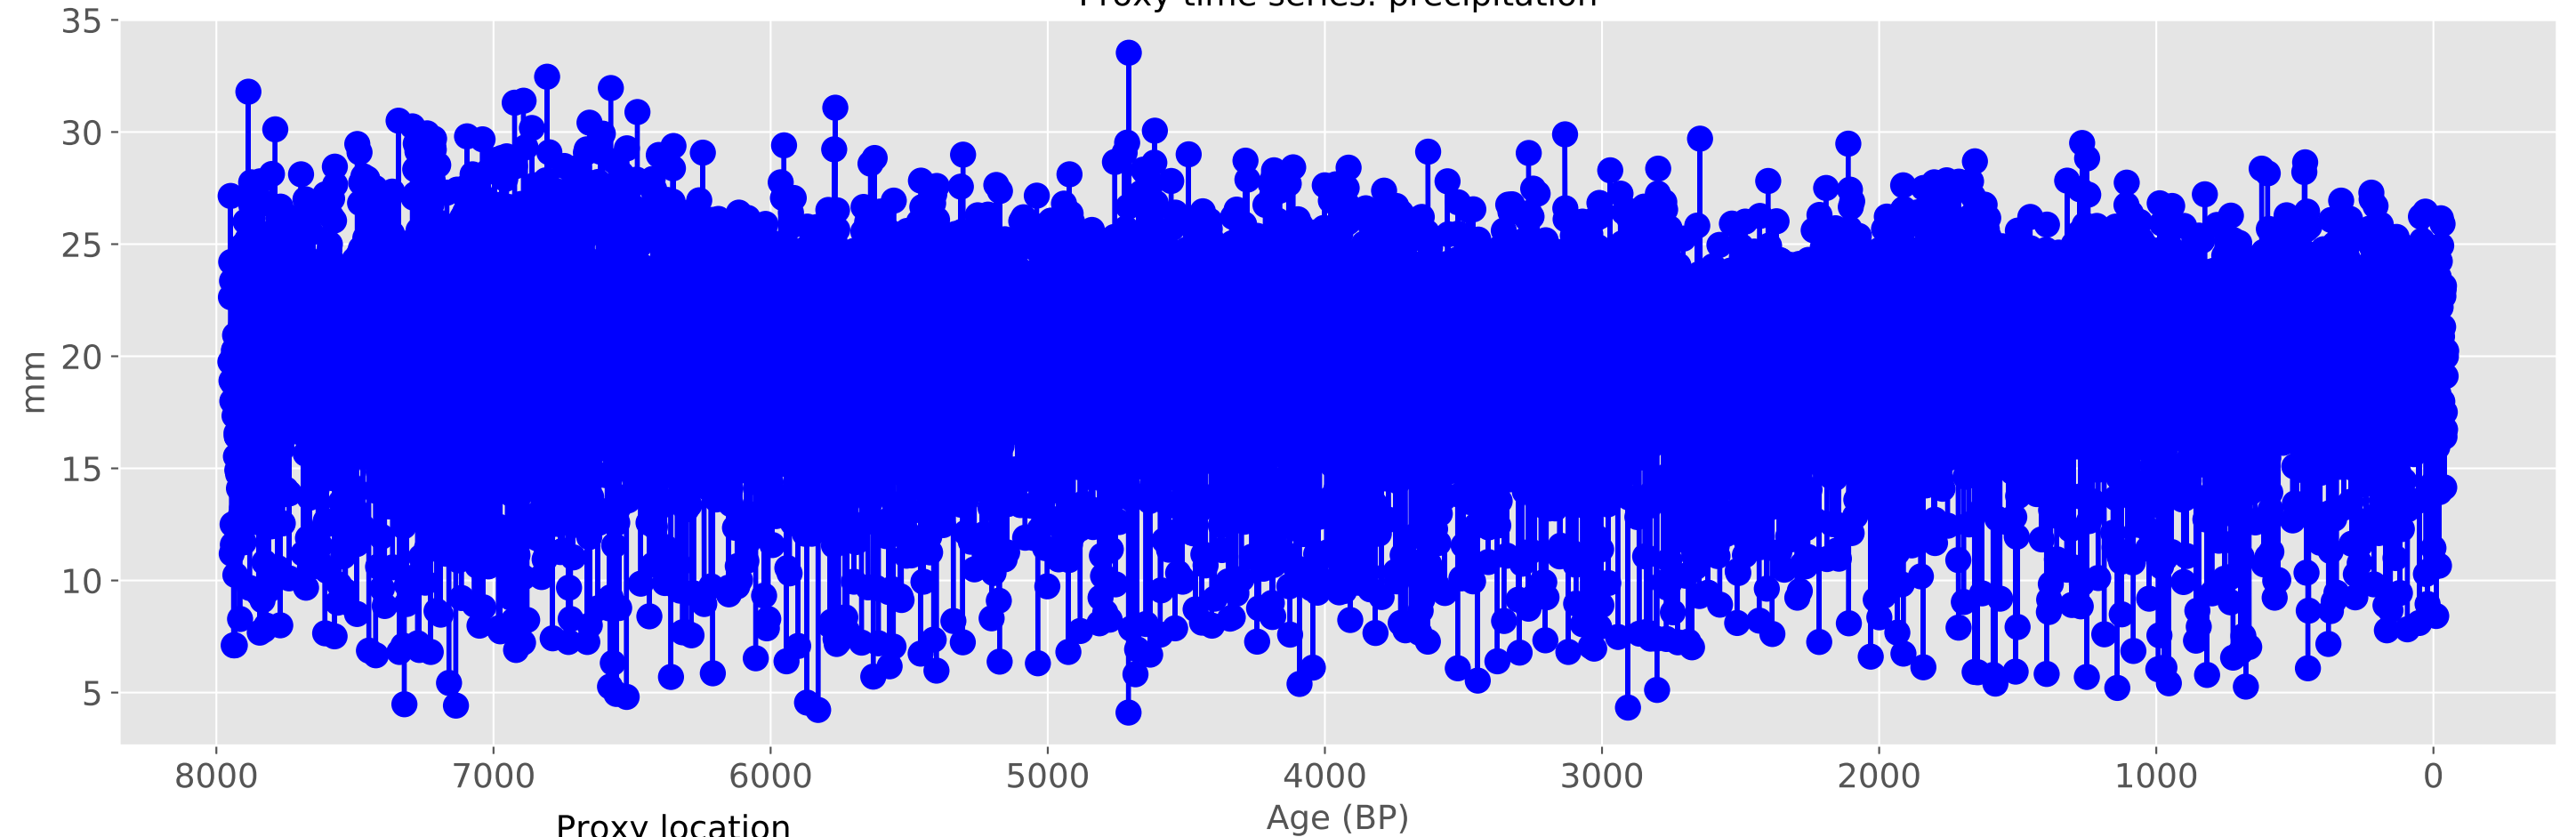

Proxy location  
(37.80 ° N, 115.80 ° W)

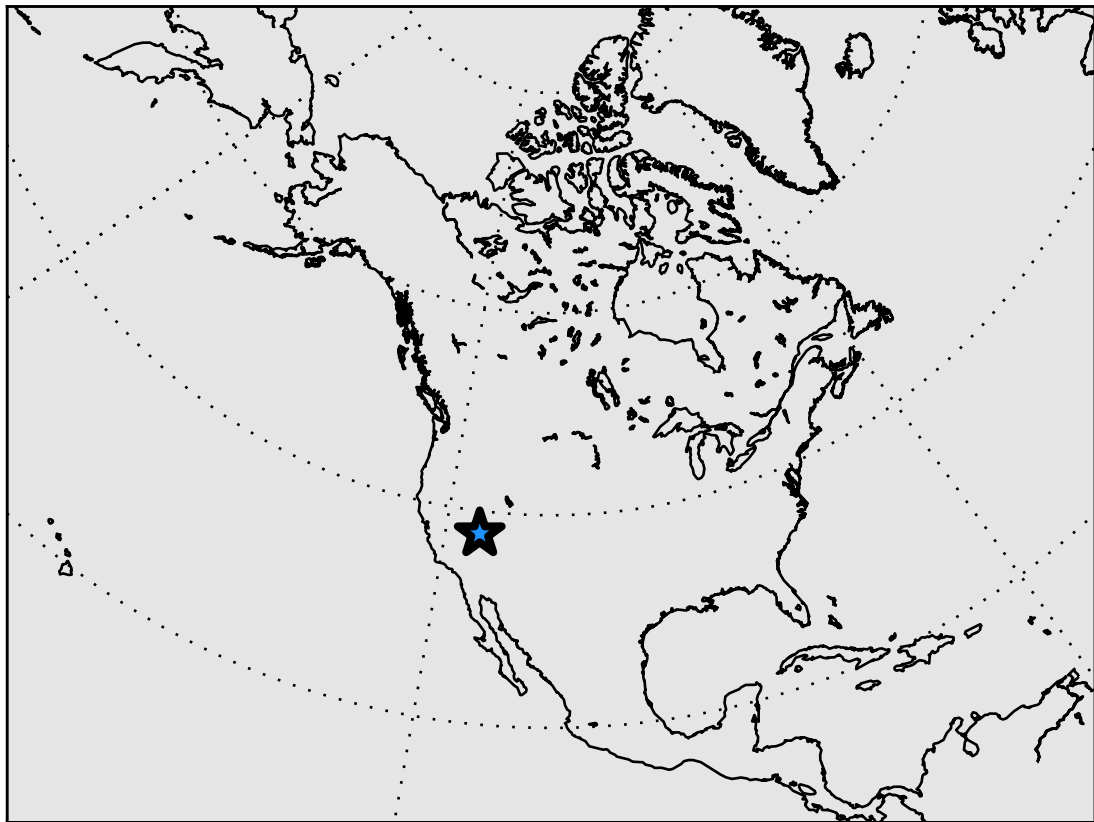

|                    |                                                                                            |
|--------------------|--------------------------------------------------------------------------------------------|
| Dataset name:      | NevadaPrecip.Hughes.1996                                                                   |
| Archive type:      | Wood                                                                                       |
| Proxy type:        | TRW                                                                                        |
| Variable name:     | precipitation                                                                              |
| Latitude ( ° N):   | 37.8                                                                                       |
| Longitude ( ° E):  | -115.8                                                                                     |
| Elevation (m):     | 1700.0                                                                                     |
| Interp. variable:  | P                                                                                          |
| Interp. detail:    | amount@surface                                                                             |
| Interp. season:    | annual                                                                                     |
| Interp. direction: | positive                                                                                   |
| Pub. 1 title:      | Climatic Variations and Forcing Mechanisms of the ...                                      |
| Pub. 1 authors:    | Hughes, M. K.;Graumlich, L. J.                                                             |
| Pub. 1 year:       | 1996                                                                                       |
| Pub. 1 DOI:        |                                                                                            |
| Original data URL: | <a href="http://www.ncdc.noaa.gov/paleo/study/6384">www.ncdc.noaa.gov/paleo/study/6384</a> |
