# Supplementary material for: A multiproxy database of western North American Holocene paleoclimate records
Source: Copernicus journal article supplement (doi:10.5194/essd-2020-215), 2020-09-30
Supplement: Supplementary file 1 [file SupplementaryTable1.xlsx]

## Sheet: newLastUpdate.csv
dataSetName	siteName	countryOcean	lat	lon	elevation	pub1_doi	pub2_doi	originalDataUrl	neotomaDatasetId	archiveType	proxy	proxyDetail	proxyGeneral	calibration_method	calibration_seasonality	paleoDataNotes	variableName	units	datum	climateVariable	climateVariableDetail	dynamicalSystem	seasonality	seasonGeneral	direction	minYear	maxYear	medianHoloceneResolution	agesPerKyr	wNAmUncertainty	inThisCompilation	QC Certification	QC comments	link to lipdverse
3MPond.Pellatt.2000	3M Pond	North America>Canada>British Columbia	49.9833	-121.217	1950	10.1080/15230430.2000.12003341		www.ncdc.noaa.gov/paleo/study/27330		LakeSediment	chironomid	assemblage	chironomid	WAPLS	7	51 lakes from British Columbia (Palmer et al. 2002)	temperature	degC	abs	T	air@surface		summer	summerOnly	positive	-275	11810	366	0.248242	1.4	TRUE	MTO, IRW	only 3 dates in past 10 ka, but evenlly spaced; untenable youngest age	http://lipdverse.org/wNAm/0_15_0/3MPond.Pellatt.2000.html
893A.Kennet.2007	893A	Pacific Ocean>North Pacific Ocean	34.2875	-120.036	-588	10.1016/j.quascirev.2006.07.019		www.ncdc.noaa.gov/paleo/study/27330		MarineSediment	d18O	pachyderma	isotope	SST calculated from d18O (TSid=LPD05340dbbdp) using the bayfoxm program bayfox_predict. Parameters: prior_mean=14.1299, prior_std=10, species=pachy, bayes=unspecified; For d18osw, values are specified to change through time, and are calculated using the getvardelo.m program from Jess Tierney, based on the modern value of d18osw (-0.4821) for the archive location and using the ages		SST calculated from d18O (TSid=LPD05340dbbdp) using the bayfoxm program bayfox_predict. Parameters: prior_mean=14.1299, prior_std=10, species=pachy, bayes=unspecified; For d18osw, values are specified to change through time, and are calculated using the getvardelo.m program from Jess Tierney, based on the modern value of d18osw (-0.4821) for the archive location and using the ages	temperature	degC	abs	T	sea@surface		annual	annual	positive	62.788	10001.9	29.6	2.4147	2.1	TRUE	PMS, AdV	seasonality not specified explicitly by author but infered from general discussion in text.	http://lipdverse.org/wNAm/0_15_0/893A.Kennet.2007.html
893A.Kennet.2007	893A	Pacific Ocean>North Pacific Ocean	34.2875	-120.036	-588	10.1016/j.quascirev.2006.07.019		www.ncdc.noaa.gov/paleo/study/27330		MarineSediment	d18O	bulloides	isotope	SST calculated from d18O (TSid=LPD28794972dp) using the bayfoxm program bayfox_predict. Parameters: prior_mean=15.1862, prior_std=10, species=bulloides, bayes=unspecified; For d18osw, values are specified to change through time, and are calculated using the getvardelo.m program from Jess Tierney, based on the modern value of d18osw (-0.4821) for the archive location and using the ages		SST calculated from d18O (TSid=LPD28794972dp) using the bayfoxm program bayfox_predict. Parameters: prior_mean=15.1862, prior_std=10, species=bulloides, bayes=unspecified; For d18osw, values are specified to change through time, and are calculated using the getvardelo.m program from Jess Tierney, based on the modern value of d18osw (-0.4821) for the archive location and using the ages	temperature	degC	abs	T	sea@surface		annual	annual	positive	8.97	10001.9	31.477	2.40169	2.1	TRUE	PMS, AdV	seasonality not specified explicitly by author but infered from general discussion in text.	http://lipdverse.org/wNAm/0_15_0/893A.Kennet.2007.html
Abalone.Cole.1994	Abalone	North America>United States Of America>California	33.96	-119.98	0	10.1006/qres.1994.1037		www.ncdc.noaa.gov/paleo/study/27330	10.21233/N36P49	LakeSediment	pollen	assemblage	pollen	MAT			temperature	degC	abs	T	air@surface		warmest month	summer+	positive	-40	6113.9	193.2	1.62499	2	TRUE	LP, TB	cannot verify seasonality	http://lipdverse.org/wNAm/0_15_0/Abalone.Cole.1994.html
Abalone.Cole.1994	Abalone	North America>United States Of America>California	33.96	-119.98	0	10.1006/qres.1994.1037		www.ncdc.noaa.gov/paleo/study/27330	10.21233/N36P49	LakeSediment	pollen	assemblage	pollen	MAT			temperature	degC	abs	T	air@surface		coldest month	winter+	positive	-40	6113.9	193.2	1.62499	3	TRUE	LP, TB	cannot verify seasonality	http://lipdverse.org/wNAm/0_15_0/Abalone.Cole.1994.html
Abalone.Cole.1994	Abalone	North America>United States Of America>California	33.96	-119.98	0	10.1006/qres.1994.1037		www.ncdc.noaa.gov/paleo/study/27330	10.21233/N36P49	LakeSediment	pollen	assemblage	pollen	MAT			temperature	degC	abs	T	air@surface		annual	annual	positive	-40	6113.9	193.2	1.62499	2.1	TRUE	LP, TB	cannot verify seasonality	http://lipdverse.org/wNAm/0_15_0/Abalone.Cole.1994.html
Abalone.Cole.1994	Abalone	North America>United States Of America>California	33.96	-119.98	0	10.1006/qres.1994.1037		www.ncdc.noaa.gov/paleo/study/27330	10.21233/N36P49	LakeSediment	pollen	assemblage	pollen	MAT		unpublished precip	precipitation	mm	abs	P	amount@surface		annual	annual	positive	-40	6113.9	193.2	1.62499	368	TRUE	LP		http://lipdverse.org/wNAm/0_15_0/Abalone.Cole.1994.html
AlfonsoBasin.StainesUrias.2015	Alfonso Basin	Pacific Ocean>North Pacific Ocean	24.6472	-110.6	-410	10.1016/j.yqres.2015.03.007		wNAm		MarineSediment	coccolith	ratio	other microfossil			"GoE values close to one would indicate La Niña-like conditions, while values closed to zero would imply strong El Niño-like conditions."	GoE	unitless	abs	MODE	elNino	el nino	annual	annual	negative	618	22174	128	0.263574	0.09	TRUE	FC, CR		http://lipdverse.org/wNAm/0_15_0/AlfonsoBasin.StainesUrias.2015.html
AlfonsoBasin.StainesUrias.2015	Alfonso Basin	Pacific Ocean>North Pacific Ocean	24.6472	-110.6	-410	10.1016/j.yqres.2015.03.007		wNAm		MarineSediment	coccolith	ratio	other microfossil			"High GoF values indicate shallow nutricline, thus strong upwelling and reduced water column stratification, while low values indicate a deeper nutricline, weak upwelling and deep stratification"	GoF	unitless	abs	upwelling	@surface		annual	annual	positive	618	22174	128	0.263574	0.1	TRUE	FC, CR		http://lipdverse.org/wNAm/0_15_0/AlfonsoBasin.StainesUrias.2015.html
Andy.Szeicz.1995	Andy	North America>Canada>Northwest Territories	64.65	-128.08	1360	10.1016/0031-0182(95)00070-3	10.5194/cp-10-1605-2014	www.ncdc.noaa.gov/paleo/study/15444	10.21233/N35X18	LakeSediment	pollen	assemblage	pollen	MAT			temperature	degC	anom	T	air@surface		coldest month	winter+	positive	0	13192	186	0.333333	3	TRUE	TB, DSK	fails age control, gap >3000 years (largest gap is 4170 yrs); five well-spaced ages in Holocene	http://lipdverse.org/wNAm/0_15_0/Andy.Szeicz.1995.html
Andy.Szeicz.1995	Andy	North America>Canada>Northwest Territories	64.65	-128.08	1360	10.1016/0031-0182(95)00070-3	10.5194/cp-10-1605-2014	www.ncdc.noaa.gov/paleo/study/15444	10.21233/N35X18	LakeSediment	pollen	assemblage	pollen	MAT			precipitation	mm	anom	P	amount@surface		annual	annual	positive	0	13192	186	0.333333	368	TRUE	CR	fails age control, gap >3000 years (largest gap is 4170 yrs); five well-spaced ages in Holocene	http://lipdverse.org/wNAm/0_15_0/Andy.Szeicz.1995.html
Andy.Szeicz.1995	Andy	North America>Canada>Northwest Territories	64.65	-128.08	1360	10.1016/0031-0182(95)00070-3	10.5194/cp-10-1605-2014	www.ncdc.noaa.gov/paleo/study/15444	10.21233/N35X18	LakeSediment	pollen	assemblage	pollen	MAT			temperature	degC	anom	T	air@surface		warmest month	summer+	positive	0	9803	174	0.408038	2	TRUE	TB, DSK	fails age control, gap >3000 years (largest gap is 4170 yrs); five well-spaced ages in Holocene	http://lipdverse.org/wNAm/0_15_0/Andy.Szeicz.1995.html
Andy.Szeicz.1995	Andy	North America>Canada>Northwest Territories	64.65	-128.08	1360	10.1016/0031-0182(95)00070-3	10.5194/cp-10-1605-2014	www.ncdc.noaa.gov/paleo/study/15444	10.21233/N35X18	LakeSediment	pollen	assemblage	pollen	MAT			temperatureComposite	degC	anom	T	air@surface		warmest + coldest month	annual	positive	0	9803	174	0.408038	2.1	TRUE	CR	this timeseries was composited programmatically, with the assumption that all values are measured at equivalent levels	http://lipdverse.org/wNAm/0_15_0/Andy.Szeicz.1995.html
BanksIsland-12.Gajewski.2000	Banks Island -12	North America>Canada>Northwest Territories	72.37	-119.83	220	10.1139/b00-018	10.1038/nature25464	www.ncdc.noaa.gov/paleo/study/27330	10.21233/N37880	LakeSediment	pollen	assemblage	pollen	MAT			temperature	degC	abs	T	air@surface		warmest month	summer+	positive	175	10183	302.5	0.29976	2	TRUE	TB, DSK	fails age control, largest gap is 3920 yrs; retain to support high-Arctic coverage. CR added coldest month to wNAm to represent winter season	http://lipdverse.org/wNAm/0_15_0/BanksIsland-12.Gajewski.2000.html
BanksIsland-12.Gajewski.2000	Banks Island -12	North America>Canada>Northwest Territories	72.37	-119.83	220	10.1139/b00-018	10.1038/nature25464	www.ncdc.noaa.gov/paleo/study/27330	10.21233/N37880	LakeSediment	pollen	assemblage	pollen	MAT			temperature	degC	abs	T	air@surface		coldest month	winter+	positive	175	10183	302.5	0.29976	3	TRUE	TB, CR	fails age control, largest gap is 3920 yrs; retain to support high-Arctic coverage	http://lipdverse.org/wNAm/0_15_0/BanksIsland-12.Gajewski.2000.html
BanksIsland-15.Gajewski.2000	Banks Island -15	North America>Canada>Northwest Territories	73.53	-120.22	120	10.1139/b00-018	10.1038/nature25464	www.ncdc.noaa.gov/paleo/study/27330	10.21233/N37880	LakeSediment	pollen	assemblage	pollen	MAT			temperature	degC	abs	T	air@surface		warmest month	summer+	positive	14	10183	127	0.393352	2	TRUE	TB, DSK	one gap 4.1 ka, but more 14C ages than other two Banks Is chronologies	http://lipdverse.org/wNAm/0_15_0/BanksIsland-15.Gajewski.2000.html
BanksIsland-15.Gajewski.2000	Banks Island -15	North America>Canada>Northwest Territories	73.53	-120.22	120	10.1139/b00-018	10.1038/nature25464	www.ncdc.noaa.gov/paleo/study/27330	10.21233/N37880	LakeSediment	pollen	assemblage	pollen	MAT			temperature	degC	abs	T	air@surface		coldest month	winter+	positive	14	10183	127	0.393352	3	TRUE	TB, DSK	one gap 4.1 ka, but more 14C ages than other two Banks Is chronologies	http://lipdverse.org/wNAm/0_15_0/BanksIsland-15.Gajewski.2000.html
BanksIsland-15.Gajewski.2000	Banks Island -15	North America>Canada>Northwest Territories	73.53	-120.22	120	10.1139/b00-018	10.1038/nature25464	www.ncdc.noaa.gov/paleo/study/27330	10.21233/N37880	LakeSediment	pollen	assemblage	pollen	MAT			temperature	degC	abs	T	air@surface		annual	annual	positive	14	10183	127	0.393352	2.1	TRUE	TB, DSK	one gap 4.1 ka, but more 14C ages than other two Banks Is chronologies	http://lipdverse.org/wNAm/0_15_0/BanksIsland-15.Gajewski.2000.html
BanksIsland-15.Gajewski.2000	Banks Island -15	North America>Canada>Northwest Territories	73.53	-120.22	120	10.1139/b00-018	10.1038/nature25464	www.ncdc.noaa.gov/paleo/study/27330	10.21233/N37880	LakeSediment	pollen	assemblage	pollen	MAT			precipitation	mm	abs	P	amount@surface		annual	annual	positive	14	10183	127	0.393352	368	TRUE	JM, CR	Pecipitation reconstruction generated with, and using methods described in Marsicek 2018. Reconstruction published as part of the wNAm database.	http://lipdverse.org/wNAm/0_15_0/BanksIsland-15.Gajewski.2000.html
BattleGround.Whitlock.1985	Battle Ground	North America>United States Of America>Washington	45.8	-122.492	155	10.1130/0016-7606(1985)96<263:LQVNBG>2.0.CO;2	10.1038/nature25464	www.ncdc.noaa.gov/paleo/study/27330	10.21233/N3002S	LakeSediment	pollen	assemblage	pollen	MAT			temperature	degC	abs	T	air@surface		warmest month	summer+	positive	-30	10542.1	236.3	0.378354	2	TRUE	TB, SHA	Lat/lon updated to four decimals with Google Earth	http://lipdverse.org/wNAm/0_15_0/BattleGround.Whitlock.1985.html
BattleGround.Whitlock.1985	Battle Ground	North America>United States Of America>Washington	45.8	-122.492	155	10.1130/0016-7606(1985)96<263:LQVNBG>2.0.CO;2	10.1038/nature25464	www.ncdc.noaa.gov/paleo/study/27330	10.21233/N3002S	LakeSediment	pollen	assemblage	pollen	MAT			temperature	degC	abs	T	air@surface		coldest month	winter+	positive	-30	10542.1	236.3	0.378354	3	TRUE	TB, SHA	Lat/lon updated to four decimals with Google Earth	http://lipdverse.org/wNAm/0_15_0/BattleGround.Whitlock.1985.html
BattleGround.Whitlock.1985	Battle Ground	North America>United States Of America>Washington	45.8	-122.492	155	10.1130/0016-7606(1985)96<263:LQVNBG>2.0.CO;2	10.1038/nature25464	www.ncdc.noaa.gov/paleo/study/27330	10.21233/N3002S	LakeSediment	pollen	assemblage	pollen	MAT			temperature	degC	abs	T	air@surface		annual	annual	positive	-30	10542.1	236.3	0.378354	2.1	TRUE	TB, SHA	Lat/lon updated to four decimals with Google Earth	http://lipdverse.org/wNAm/0_15_0/BattleGround.Whitlock.1985.html
BattleGround.Whitlock.1985	Battle Ground	North America>United States Of America>Washington	45.8	-122.492	155	10.1130/0016-7606(1985)96<263:LQVNBG>2.0.CO;2	10.1038/nature25464	www.ncdc.noaa.gov/paleo/study/27330	10.21233/N3002S	LakeSediment	pollen	assemblage	pollen	MAT			precipitation	mm	abs	P	amount@surface		annual	annual	positive	-30	10542.1	236.3	0.378354	368	TRUE	JM, CR, SHA	Lat/lon updated to four decimals with Google Earth. Pecipitation reconstruction generated with, and using methods described in Marsicek 2018. Reconstruction published as part of the wNAm database.	http://lipdverse.org/wNAm/0_15_0/BattleGround.Whitlock.1985.html
BeaverLake.Schmieder.2011	Beaver Lake	North America>United States Of America>Nebraska	42.46	-100.67	905	10.1016/j.quascirev.2011.04.011		www.ncdc.noaa.gov/paleo/study/23075		LakeSediment	diatom	assemblage	other microfossil			lake_Z_score diatom inferred lake level,standard deviation unit	lakeLevel	standardized	anom	P-E	lakeLevel@surface		annual	annual	positive	0	6449.64	28.667	1.55047	0.68	TRUE	CR		http://lipdverse.org/wNAm/0_15_0/BeaverLake.Schmieder.2011.html
BeefPasture.Petersen.1985	Beef Pasture	North America>United States Of America>Colorado	37.47	-108.16	3060	Petersen, K. L. (1985). Palynology in Montezuma County, Southwestern Colorado: the local history of pinyon pine (Pinus edulis). Late Quaternary Palynology of the American Southwest, ASSP Contribution Series, 16, 47-62.	10.1038/nature25464	www.ncdc.noaa.gov/paleo/study/27330	10.21233/N34T3P; 10.21233/N3JS4F	LakeSediment	pollen	assemblage	pollen	MAT			temperature	degC	abs	T	air@surface		warmest month	summer+	positive	0	6025.2	32.8	1.82567	2	TRUE	TB, DSK	fails age control, gap >3000 years (largest gap is 6245 yrs); excellent chronology over the upper 5 ka	http://lipdverse.org/wNAm/0_15_0/BeefPasture.Petersen.1985.html
BeefPasture.Petersen.1985	Beef Pasture	North America>United States Of America>Colorado	37.47	-108.16	3060	Petersen, K. L. (1985). Palynology in Montezuma County, Southwestern Colorado: the local history of pinyon pine (Pinus edulis). Late Quaternary Palynology of the American Southwest, ASSP Contribution Series, 16, 47-62.	10.1038/nature25464	www.ncdc.noaa.gov/paleo/study/27330	10.21233/N34T3P; 10.21233/N3JS4F	LakeSediment	pollen	assemblage	pollen	MAT			temperature	degC	abs	T	air@surface		coldest month	winter+	positive	0	6025.2	32.8	1.82567	3	TRUE	TB, DSK	fails age control, gap >3000 years (largest gap is 6245 yrs); excellent chronology over the upper 5 ka	http://lipdverse.org/wNAm/0_15_0/BeefPasture.Petersen.1985.html
BeefPasture.Petersen.1985	Beef Pasture	North America>United States Of America>Colorado	37.47	-108.16	3060	Petersen, K. L. (1985). Palynology in Montezuma County, Southwestern Colorado: the local history of pinyon pine (Pinus edulis). Late Quaternary Palynology of the American Southwest, ASSP Contribution Series, 16, 47-62.	10.1038/nature25464	www.ncdc.noaa.gov/paleo/study/27330	10.21233/N34T3P; 10.21233/N3JS4F	LakeSediment	pollen	assemblage	pollen	MAT			temperature	degC	abs	T	air@surface		annual	annual	positive	0	6025.2	32.8	1.82567	2.1	TRUE	TB, DSK	fails age control, gap >3000 years (largest gap is 6245 yrs); excellent chronology over the upper 5 ka	http://lipdverse.org/wNAm/0_15_0/BeefPasture.Petersen.1985.html
BeefPasture.Petersen.1985	Beef Pasture	North America>United States Of America>Colorado	37.47	-108.16	3060	Petersen, K. L. (1985). Palynology in Montezuma County, Southwestern Colorado: the local history of pinyon pine (Pinus edulis). Late Quaternary Palynology of the American Southwest, ASSP Contribution Series, 16, 47-62.	10.1038/nature25464	www.ncdc.noaa.gov/paleo/study/27330	10.21233/N34T3P; 10.21233/N3JS4F	LakeSediment	pollen	assemblage	pollen	MAT			precipitation	mm	abs	P	amount@surface		annual	annual	positive	0	6025.2	32.8	1.82567	368	TRUE	JM, CR	Suspicious anomalies in precip record. f=Fails age control, gap >3000 years (largest gap is 6245 yrs); excellent chronology over the upper 5 ka. Pecipitation reconstruction generated with, and using methods described in Marsicek 2018. Reconstruction published as part of the wNAm database.	http://lipdverse.org/wNAm/0_15_0/BeefPasture.Petersen.1985.html
BegbieLake.Brown.2019	Begbie Lake	North America>Canada>British Columbia	48.59	-123.68	188	10.1177/0959683619854523		wNAm		LakeSediment	pollen	assemblage	pollen	DWHI-MAP		Updated MAP reconstruction fro wNAm	precipitation	mm	abs	P	amount@surface		annual	annual	positive	-64	11569	202	0.859623	368	TRUE	KJB, GS		http://lipdverse.org/wNAm/0_15_0/BegbieLake.Brown.2019.html
BellsLake.Szeicz.1995	Bells Lake	North America>Canada>Northwest Territories	65.02	-127.48	580	10.1016/0031-0182(95)00070-3	10.1175/2008JCLI2342.1	10.21233/N35G6P	10.21233/N35G6P	LakeSediment	pollen	assemblage	pollen	MAT			temperature	degC	anom	T	air@surface		warmest month	summer+	positive	0	13299	208	0.333333	2	TRUE	TB, CR	fails age control, gap >3000 years (largest gap is 3140 yrs); temp reconstructions come from 10.1175/2008JCLI2342.1 (not currently listed). CR added warmest and coldest months to wNAm to represent warm and cold seasons.	http://lipdverse.org/wNAm/0_15_0/BellsLake.Szeicz.1995.html
BellsLake.Szeicz.1995	Bells Lake	North America>Canada>Northwest Territories	65.02	-127.48	580	10.1016/0031-0182(95)00070-3	10.1175/2008JCLI2342.1	10.21233/N35G6P	10.21233/N35G6P	LakeSediment	pollen	assemblage	pollen	MAT			precipitation	mm	anom	P	amount@surface		annual	annual	positive	0	13299	208	0.333333	368	TRUE	CR	fails age control, gap >3000 years (largest gap is 3140 yrs); temp reconstructions come from 10.1175/2008JCLI2342.1 (not currently listed)	http://lipdverse.org/wNAm/0_15_0/BellsLake.Szeicz.1995.html
BellsLake.Szeicz.1995	Bells Lake	North America>Canada>Northwest Territories	65.02	-127.48	580	10.1016/0031-0182(95)00070-3	10.1175/2008JCLI2342.1	10.21233/N35G6P	10.21233/N35G6P	LakeSediment	pollen	assemblage	pollen	MAT			temperature	degC	anom	T	air@surface		coldest month	winter+	positive	0	9702	203	0.412286	3	TRUE	TB, CR	fails age control, gap >3000 years (largest gap is 3140 yrs); temp reconstructions come from 10.1175/2008JCLI2342.1 (not currently listed). CR added warmest and coldest months to wNAm to represent warm and cold seasons.	http://lipdverse.org/wNAm/0_15_0/BellsLake.Szeicz.1995.html
BellsLake.Szeicz.1995	Bells Lake	North America>Canada>Northwest Territories	65.02	-127.48	580	10.1016/0031-0182(95)00070-3	10.1175/2008JCLI2342.1	10.21233/N35G6P	10.21233/N35G6P	LakeSediment	pollen	assemblage	pollen	MAT			temperatureComposite	degC	anom	T	air@surface		warmest + coldest month	annual	positive	0	13299	208	0.333333	2.1	TRUE	TB, CR	fails age control, but just slightly; temp reconstructions come from 10.1175/2008JCLI2342.1; this timeseries was composited programmatically, with the assumption that all values are measured at equivalent levels	http://lipdverse.org/wNAm/0_15_0/BellsLake.Szeicz.1995.html
Big.Cumming.2002	Big Lake	North America>Canada>British Columbia	51.668	-121.45	1030	10.1073/pnas.252603099		www.ncdc.noaa.gov/paleo/study/23089		LakeSediment	diatom	assemblage	other microfossil				lakeLevel	m	abs	P-E	lakeLevel@surface		annual	annual	positive	-41.58	5533	13.392	3.58771	2.5	TRUE	JB		http://lipdverse.org/wNAm/0_15_0/Big.Cumming.2002.html
Big.Cumming.2002	Big Lake	North America>Canada>British Columbia	51.668	-121.45	1030	10.1073/pnas.252603099		www.ncdc.noaa.gov/paleo/study/23089		LakeSediment	diatom	assemblage	other microfossil			Units in Log base 10, mg/liter. Mean_boot_salinity.	salinity	log mg/L	abs	P-E	lakeSalinity		annual	annual	negative	-41.58	5533	13.392	3.58771	0.16	TRUE	JB		http://lipdverse.org/wNAm/0_15_0/Big.Cumming.2002.html
BisonLake.Anderson.2011	Bison Lake	North America>United States Of America>Colorado	39.76	-107.35	3255	10.1130/G31575.1		www.ncdc.noaa.gov/paleo/study/10749		LakeSediment	d18O	calcite in bulk sediment	isotope			Amount effect. Winter precipitaiton amount or balance of winter versus summer	d18O	permil	abs	P	amount@surface		winter	winterOnly	negative	-58	10290	27.019		0.89	TRUE	CR	Missing age model. Winter drought, but also winter/summer precipitation balance.	http://lipdverse.org/wNAm/0_15_0/BisonLake.Anderson.2011.html
BlueLake.Routson.2019	Blue Lake	North America>United States Of America>Colorado	37.24	-106.63	3500	10.1029/2019GL083255		www.ncdc.noaa.gov/paleo/study/27078		LakeSediment	Ti,Ca,K	XRF bulk sediment	biophysical			Ti/Ca and K/Ca element mixing model	dustFlux	g/cm2/yr	abs	DUST	@surface		annual	annual	positive	-60.1151	4474.34	1.78457	3.08747	0.01	TRUE	SHA	no clear climate interpretation	http://lipdverse.org/wNAm/0_15_0/BlueLake.Routson.2019.html
BoomerangLake.Brown.2006	Boomerang Lake	North America>Canada>British Columbia	49.18	-124.16	361	10.1016/j.quascirev.2006.02.020		wNAm		LakeSediment	pollen	assemblage	pollen	DWHI-MAP		MAP_updated	precipitation	mm	abs	P	amount@surface		annual	annual	positive	-45	11768	299	0.507915	368	TRUE	KJB	3091-year chronology gap, but includes 6 well spaced Holocene ages	http://lipdverse.org/wNAm/0_15_0/BoomerangLake.Brown.2006.html
Boone.White.1986	Boone	North America>Canada>Alberta	55.58	-119.43	872	10.1139/b86-302	10.1038/nature25464	www.ncdc.noaa.gov/paleo/study/27330	10.21233/N36D82	LakeSediment	pollen	assemblage	pollen	MAT			temperature	degC	abs	T	air@surface		warmest month	summer+	positive	-28	10528	86.5	0.568397	2	TRUE	TB		http://lipdverse.org/wNAm/0_15_0/Boone.White.1986.html
Boone.White.1986	Boone	North America>Canada>Alberta	55.58	-119.43	872	10.1139/b86-302	10.1038/nature25464	www.ncdc.noaa.gov/paleo/study/27330	10.21233/N36D82	LakeSediment	pollen	assemblage	pollen	MAT			temperature	degC	abs	T	air@surface		coldest month	winter+	positive	-28	10528	86.5	0.568397	3	TRUE	TB		http://lipdverse.org/wNAm/0_15_0/Boone.White.1986.html
Boone.White.1986	Boone	North America>Canada>Alberta	55.58	-119.43	872	10.1139/b86-302	10.1038/nature25464	www.ncdc.noaa.gov/paleo/study/27330	10.21233/N36D82	LakeSediment	pollen	assemblage	pollen	MAT			temperature	degC	abs	T	air@surface		annual	annual	positive	-28	10528	86.5	0.568397	2.1	TRUE	TB		http://lipdverse.org/wNAm/0_15_0/Boone.White.1986.html
Boone.White.1986	Boone	North America>Canada>Alberta	55.58	-119.43	872	10.1139/b86-302	10.1038/nature25464	www.ncdc.noaa.gov/paleo/study/27330	10.21233/N36D82	LakeSediment	pollen	assemblage	pollen	MAT			precipitation	mm	abs	P	amount@surface		annual	annual	positive	-28	10528	86.5	0.568397	368	TRUE	JM	Pecipitation reconstruction generated with, and using methods described in Marsicek 2018. Reconstruction published as part of the wNAm database.	http://lipdverse.org/wNAm/0_15_0/Boone.White.1986.html
CandelabraLake.Cwynar.1995	Candelabra Lake	North America>Canada>Yukon Territory	61.68	-130.65	1040	10.7202/033027ar	10.5194/cp-10-1605-2014	www.ncdc.noaa.gov/paleo/study/15444	10.21233/N32H63	LakeSediment	pollen	assemblage	pollen	MAT			temperature	degC	abs	T	air@surface		warmest month	summer+	positive	352	12567	191	0.944368	2	TRUE	TB		http://lipdverse.org/wNAm/0_15_0/CandelabraLake.Cwynar.1995.html
CandelabraLake.Cwynar.1995	Candelabra Lake	North America>Canada>Yukon Territory	61.68	-130.65	1040	10.7202/033027ar	10.5194/cp-10-1605-2014	www.ncdc.noaa.gov/paleo/study/15444	10.21233/N32H63	LakeSediment	pollen	assemblage	pollen	MAT			precipitation	mm	abs	P	amount@surface		annual	annual	positive	352	12567	191	0.944368	368	TRUE	CR		http://lipdverse.org/wNAm/0_15_0/CandelabraLake.Cwynar.1995.html
CandelabraLake.Cwynar.1995	Candelabra Lake	North America>Canada>Yukon Territory	61.68	-130.65	1040	10.7202/033027ar	10.5194/cp-10-1605-2014	www.ncdc.noaa.gov/paleo/study/15444	10.21233/N32H63	LakeSediment	pollen	assemblage	pollen	MAT			temperature	degC	abs	T	air@surface		winter	winter+	positive	352	12567	191	0.944368	3	TRUE	DSK		http://lipdverse.org/wNAm/0_15_0/CandelabraLake.Cwynar.1995.html
CandelabraLake.Cwynar.1995	Candelabra Lake	North America>Canada>Yukon Territory	61.68	-130.65	1040	10.7202/033027ar	10.5194/cp-10-1605-2014	www.ncdc.noaa.gov/paleo/study/15444	10.21233/N32H63	LakeSediment	pollen	assemblage	pollen	MAT			temperatureComposite	degC	anom	T	air@surface		warmest month + winter	annual	positive	352	12567	191	0.944368	2.1	TRUE	TB	this timeseries was composited programmatically, with the assumption that all values are measured at equivalent levels	http://lipdverse.org/wNAm/0_15_0/CandelabraLake.Cwynar.1995.html
CarletonLake.Upiter.2014	Carleton Lake	North America>Canada>Northwest Territories	64.2572	-110.101	420	10.1007/s10933-014-9775-5		www.ncdc.noaa.gov/paleo/study/16296		LakeSediment	chironomid	assemblage	chironomid	WAPLS	7	1. reconstruction based on Porinchu et al (2009) transfer function: this model had stronger analogues with the samples than the Barley et al (2006) model; 2. reconstruction based on Barley et al (2006) transfer function: weaker analogues in the downcore and training set chironomid communities. The reconstructed temperatures based on the Porinchu et al (2009) training set are likely more accurate.	temperatureComposite	degC	anom	T	air@surface		summer	summerOnly	positive	-53.9	5964.2	100.4	0.996992	1.4	TRUE	YLA, MTO	timeseries was composited programmatically, with the assumption that all values are measured at equivalent levels	http://lipdverse.org/wNAm/0_15_0/CarletonLake.Upiter.2014.html
Carp.Whitlock.1985	Carp Lake	North America>United States Of America>Washington	45.92	-120.88	714	10.1016/0033-5894(85)90075-4	10.1038/nature25464	www.ncdc.noaa.gov/paleo/study/27330	10.21233/N3597B	LakeSediment	pollen	assemblage	pollen	MAT			temperature	degC	abs	T	air@surface		warmest month	summer+	positive	0	10008.7	270.6	0.499565	2	TRUE	TB		http://lipdverse.org/wNAm/0_15_0/Carp.Whitlock.1985.html
Carp.Whitlock.1985	Carp Lake	North America>United States Of America>Washington	45.92	-120.88	714	10.1016/0033-5894(85)90075-4	10.1038/nature25464	www.ncdc.noaa.gov/paleo/study/27330	10.21233/N3597B	LakeSediment	pollen	assemblage	pollen	MAT			temperature	degC	abs	T	air@surface		coldest month	winter+	positive	0	10008.7	270.6	0.499565	3	TRUE	TB		http://lipdverse.org/wNAm/0_15_0/Carp.Whitlock.1985.html
Carp.Whitlock.1985	Carp Lake	North America>United States Of America>Washington	45.92	-120.88	714	10.1016/0033-5894(85)90075-4	10.1038/nature25464	www.ncdc.noaa.gov/paleo/study/27330	10.21233/N3597B	LakeSediment	pollen	assemblage	pollen	MAT			temperature	degC	abs	T	air@surface		annual	annual	positive	0	10008.7	270.6	0.499565	2.1	TRUE	TB		http://lipdverse.org/wNAm/0_15_0/Carp.Whitlock.1985.html
Carp.Whitlock.1985	Carp Lake	North America>United States Of America>Washington	45.92	-120.88	714	10.1016/0033-5894(85)90075-4	10.1038/nature25464	www.ncdc.noaa.gov/paleo/study/27330	10.21233/N3597B	LakeSediment	pollen	assemblage	pollen	MAT			precipitation	mm	abs	P	amount@surface		annual	annual	positive	0	10008.7	270.6	0.499565	368	TRUE	JM	Pecipitaition reconstruction generated with, and using methods described in Marsicek 2018. Reconstruction published as part of the wNAm database.	http://lipdverse.org/wNAm/0_15_0/Carp.Whitlock.1985.html
CascadeFen.Maher.1963	Cascade Fen	North America>United States Of America>Colorado	37.65	-107.81	2690	10.1130/0016-7606(1963)74[1485:PAOSMF]2.0.CO;2	10.1038/nature25464	www.ncdc.noaa.gov/paleo/study/27330	10.21233/N3288F	LakeSediment	pollen	assemblage	pollen	MAT			temperature	degC	abs	T	air@surface		warmest month	summer+	positive	0.7	6482.5	68.5	0.308556	2	TRUE	TB		http://lipdverse.org/wNAm/0_15_0/CascadeFen.Maher.1963.html
CascadeFen.Maher.1963	Cascade Fen	North America>United States Of America>Colorado	37.65	-107.81	2690	10.1130/0016-7606(1963)74[1485:PAOSMF]2.0.CO;2	10.1038/nature25464	www.ncdc.noaa.gov/paleo/study/27330	10.21233/N3288F	LakeSediment	pollen	assemblage	pollen	MAT			temperature	degC	abs	T	air@surface		coldest month	winter+	positive	0.7	6482.5	68.5	0.308556	3	TRUE	TB		http://lipdverse.org/wNAm/0_15_0/CascadeFen.Maher.1963.html
CascadeFen.Maher.1963	Cascade Fen	North America>United States Of America>Colorado	37.65	-107.81	2690	10.1130/0016-7606(1963)74[1485:PAOSMF]2.0.CO;2	10.1038/nature25464	www.ncdc.noaa.gov/paleo/study/27330	10.21233/N3288F	LakeSediment	pollen	assemblage	pollen	MAT			temperature	degC	abs	T	air@surface		annual	annual	positive	0.7	6482.5	68.5	0.308556	2.1	TRUE	TB		http://lipdverse.org/wNAm/0_15_0/CascadeFen.Maher.1963.html
CascadeFen.Maher.1963	Cascade Fen	North America>United States Of America>Colorado	37.65	-107.81	2690	10.1130/0016-7606(1963)74[1485:PAOSMF]2.0.CO;2	10.1038/nature25464	www.ncdc.noaa.gov/paleo/study/27330	10.21233/N3288F	LakeSediment	pollen	assemblage	pollen	MAT			precipitation	mm	abs	P	amount@surface		annual	annual	positive	0.7	6482.5	68.5	0.308556	368	TRUE	JM	Pecipitation reconstruction generated with, and using methods described in Marsicek 2018. Reconstruction published as part of the wNAm database.	http://lipdverse.org/wNAm/0_15_0/CascadeFen.Maher.1963.html
Castor.Nelson.2011	Castor Lake	North America>United States Of America>Washington	48.54	-119.56	594	10.1073/pnas.1009194108		www.ncdc.noaa.gov/paleo/study/10310		LakeSediment	reflectance	core face	biophysical			Detrented grayscale. "dark layers are formed during arid periods when reduced Ca2th input from groundwater leads to a decline in aragonite precipitation"	reflectance	grayscale	abs	P-E	groundWaterLevel		annual	annual	negative	101	6000	1	2.20376	14.59	TRUE	CR	detrended record	http://lipdverse.org/wNAm/0_15_0/Castor.Nelson.2011.html
Castor.Nelson.2011	Castor Lake	North America>United States Of America>Washington	48.54	-119.56	594	10.1073/pnas.1009194108		www.ncdc.noaa.gov/paleo/study/10310		LakeSediment	d18O	aragonite	isotope			P/E lake	d18O	permil	abs	P-E	lake@surface		annual	annual	negative	-48	6029.01	4.88	2.13921	0.59	TRUE	CR		http://lipdverse.org/wNAm/0_15_0/Castor.Nelson.2011.html
Chichancanab.Hodell.1995	Chichancanab Lake	North America>Mexico	19.8333	-88.75	3	10.1038/375391a0		www.ncdc.noaa.gov/paleo/study/5483		LakeSediment	CaCO3	bulk sediment	biophysical		"We assume that downcore shifts in the relative abundance of calcite and gypsum in sediments reflect changes in the hydroligic budget of the lake that were ultimatly controlled by changes in the reation between evaporation and precipitaiton (E/P)"	CaCO3	CaCO3	percent	abs	P-E	lake@surface	monsoon	summer	summerOnly	positive	-9.738	10917.9	20.55	1.28116	28.25	TRUE	CR		http://lipdverse.org/wNAm/0_15_0/Chichancanab.Hodell.1995.html
Chichancanab.Hodell.1995	Chichancanab Lake	North America>Mexico	19.8333	-88.75	3	10.1038/375391a0		www.ncdc.noaa.gov/paleo/study/5483		LakeSediment	S	bulk sediment	biophysical		"We assume that downcore shifts in the relative abundance of calcite and gypsum in sediments reflect changes in the hydroligic budget of the lake that were ultimatly controlled by changes in the reation between evaporation and precipitaiton (E/P)"	Sulphur	S	percent	abs	P-E	lake@surface	monsoon	summer	summerOnly	positive	156.572	10917.9	20.55	1.30096	4.5	TRUE	CR		http://lipdverse.org/wNAm/0_15_0/Chichancanab.Hodell.1995.html
Chichancanab.Hodell.1995	Chichancanab Lake	North America>Mexico	19.8333	-88.75	3	10.1038/375391a0		www.ncdc.noaa.gov/paleo/study/5483		LakeSediment	d18O	pyrgophorus shells	isotope			E/P lake	d18O	permil	abs	P-E	lake@surface	monsoon	summer	summerOnly	negative	-9.738	8189.42	20.55	1.70749	0.88	TRUE	CR		http://lipdverse.org/wNAm/0_15_0/Chichancanab.Hodell.1995.html
Chichancanab.Hodell.1995	Chichancanab Lake	North America>Mexico	19.8333	-88.75	3	10.1038/375391a0		www.ncdc.noaa.gov/paleo/study/5483		LakeSediment	d18O	shells	isotope			E/P lake	d18O	permil	abs	P-E	lake@surface	monsoon	summer	summerOnly	negative	-9.738	8189.42	20.55	1.70749	0.41	TRUE	CR		http://lipdverse.org/wNAm/0_15_0/Chichancanab.Hodell.1995.html
ChihuahuenosBog.Anderson.2008	Chihuahuenos Bog	North America>United States Of America>New Mexico	36.0475	-106.51	2925	10.1016/j.yqres.2007.12.002		wNAm		Peat	pollen	single species	pollen			pinyon curve is a good approximate of changes in winter precipitation.	Pinyon	percent	abs	P-E	@surface		winter	winterOnly	positive	-46	17641	86	0.581106	5.9	TRUE	CR		http://lipdverse.org/wNAm/0_15_0/ChihuahuenosBog.Anderson.2008.html
ChihuahuenosBog.Anderson.2008	Chihuahuenos Bog	North America>United States Of America>New Mexico	36.0475	-106.51	2925	10.1016/j.yqres.2007.12.002		wNAm		Peat	pollen	ratio	pollen			Indication for the position of upper treeline	Picea/Pinus	unitless	abs	T	air@surface		annual	annual	positive	-46	17641	86	0.581106	0.1	TRUE	CR	This pollen ratio time series was generated for the wNAm database.	http://lipdverse.org/wNAm/0_15_0/ChihuahuenosBog.Anderson.2008.html
ChihuahuenosBog.Anderson.2008	Chihuahuenos Bog	North America>United States Of America>New Mexico	36.0475	-106.51	2925	10.1016/j.yqres.2007.12.002		wNAm		Peat	pollen	ratio	pollen			Ratio to relative shifts between the subalpine and the lower altitudinal steppe vegetation belts. A proxy for the elevation of treeline and the density of Picea subalpine forest	Picea/Artemesia	unitless	abs	T	air@surface		annual	annual	positive	-46	17641	86	0.581106	0.86	TRUE	CR	This pollen ratio time series was generated for the wNAm database.	http://lipdverse.org/wNAm/0_15_0/ChihuahuenosBog.Anderson.2008.html
ChihuahuenosBog.Anderson.2008	Chihuahuenos Bog	North America>United States Of America>New Mexico	36.0475	-106.51	2925	10.1016/j.yqres.2007.12.002		wNAm		Peat	pollen	ratio	pollen			Indication for the position of lower treeline	Pinus/Artemesia	unitless	abs	T	air@surface		annual	annual	positive	-46	17641	86	0.581106	3.79	TRUE	CR	This pollen ratio time series was generated for the wNAm database.	http://lipdverse.org/wNAm/0_15_0/ChihuahuenosBog.Anderson.2008.html
Chitina.Muhs.2013	Chitina loess section	North America>United States Of America>Alaska	61.54	-144.38	150	10.1016/j.aeolia.2013.06.001	10.5194/cp-11-869-2015	https://www.ncdc.noaa.gov/paleo/study/20529		loess	particle size	bulk sediment	biophysical			clay% + 1/4 silt% and MAR	DMAR	g/m2/yr	abs	DUST	@surface		annual	annual	positive	1227	10786	374	2.51072	293.21	TRUE	AC, DK, SHA	unclear climate interpretation	http://lipdverse.org/wNAm/0_15_0/Chitina.Muhs.2013.html
ClelandLake.Steinman.2016	Cleland Lake	North America>Canada>British Columbia	50.83	-116.39	1126	10.1016/j.quascirev.2016.04.012		www.ncdc.noaa.gov/paleo-search/study/21250		LakeSediment	d18O	calcite in bulk sediment	isotope			P/E lake	d18O	permil	abs	P-E	lakeLevel@surface		winter	winterOnly	negative	-59	7555.7	3.3	1.70722	1.26	TRUE	CR		http://lipdverse.org/wNAm/0_15_0/ClelandLake.Steinman.2016.html
ClelandLake.Steinman.2016	Cleland Lake	North America>Canada>British Columbia	50.83	-116.39	1126	10.1016/j.quascirev.2016.04.012		www.ncdc.noaa.gov/paleo-search/study/21250		LakeSediment	d13C	organic carbon in bulk sediment	isotope			lake level, d13C	d13C	permil	abs	P-E	lakeLevel@surface		winter	winterOnly	negative	-59	7555.7	3.3	1.70722	2.04	TRUE	CR		http://lipdverse.org/wNAm/0_15_0/ClelandLake.Steinman.2016.html
Copley.Fall.1997	Copley Lake	North America>United States Of America>Colorado	38.87	-107.08	3250	10.1130/0016-7606(1997)109<1306:TFALQP>2.3.CO;2	10.1038/nature25464	www.ncdc.noaa.gov/paleo/study/27330	10.21233/N34M74	LakeSediment	pollen	assemblage	pollen	MAT			temperature	degC	abs	T	air@surface		warmest month	summer+	positive	-27	10710	220	0.465679	2	TRUE	TB, DSK	fails age control, gap >3000 years (largest gap is 4120 yrs), but six ages within Holocene	http://lipdverse.org/wNAm/0_15_0/Copley.Fall.1997.html
Copley.Fall.1997	Copley Lake	North America>United States Of America>Colorado	38.87	-107.08	3250	10.1130/0016-7606(1997)109<1306:TFALQP>2.3.CO;2	10.1038/nature25464	www.ncdc.noaa.gov/paleo/study/27330	10.21233/N34M74	LakeSediment	pollen	assemblage	pollen	MAT			temperature	degC	abs	T	air@surface		coldest month	winter+	positive	-27	10710	220	0.465679	3	TRUE	TB, DSK	fails age control, gap >3000 years (largest gap is 4120 yrs), but six ages within Holocene	http://lipdverse.org/wNAm/0_15_0/Copley.Fall.1997.html
Copley.Fall.1997	Copley Lake	North America>United States Of America>Colorado	38.87	-107.08	3250	10.1130/0016-7606(1997)109<1306:TFALQP>2.3.CO;2	10.1038/nature25464	www.ncdc.noaa.gov/paleo/study/27330	10.21233/N34M74	LakeSediment	pollen	assemblage	pollen	MAT			temperature	degC	abs	T	air@surface		annual	annual	positive	-27	10710	220	0.465679	2.1	TRUE	TB, DSK	fails age control, gap >3000 years (largest gap is 4120 yrs), but six ages within Holocene	http://lipdverse.org/wNAm/0_15_0/Copley.Fall.1997.html
Copley.Fall.1997	Copley Lake	North America>United States Of America>Colorado	38.87	-107.08	3250	10.1130/0016-7606(1997)109<1306:TFALQP>2.3.CO;2	10.1038/nature25464	www.ncdc.noaa.gov/paleo/study/27330	10.21233/N34M74	LakeSediment	pollen	assemblage	pollen	MAT			precipitation	mm	abs	P	amount@surface		annual	annual	positive	-27	10710	220	0.465679	368	TRUE	JM	Pecipitation reconstruction generated with, and using methods described in Marsicek 2018. Reconstruction published as part of the wNAm database.	http://lipdverse.org/wNAm/0_15_0/Copley.Fall.1997.html
Corser.Nichols.2014	Corser Bog	North America>United States Of America>Alaska	60.53	-145.45	70	10.1177/0959683614540729	10.5194/cp-10-1605-2014	www.ncdc.noaa.gov/paleo/study/15444		Peat	GDGT	MBT-CBT and MBT'-CBT	other biomarker	Weijers et al., 2007 10.1016/j.gca.2006.10.003 and Peterse et al., 2012 10.1016/j.gca.2012.08.011	annual	"While neither of these calibrations seems to reconstruct reasonable range of temperatures for the Holocene – both calibrations reconstruct a range of temperatures for the Holocene that exceeds 6°C – the shifts in temperature we reconstruct are broadly consistent with changes in glacial ice extent documented throughout south-central Alaska (Figure 6). This consistency suggests that the MBT/CBT te…	temperature	relativeT	anom	T	air@surface		annual	annual	positive	103	11116	213	1.27122	1.4	TRUE	EKT	authors reconstruct temperature using two calibrations, and display and interpret both records equally in this paper. Neither reconstruction accurately representes the magnidute of temprature change. For this database, we set "units" = "relative T" to encode the limitations described by the original authors.	http://lipdverse.org/wNAm/0_15_0/Corser.Nichols.2014.html
Corser.Nichols.2014	Corser Bog	North America>United States Of America>Alaska	60.53	-145.45	70	10.1177/0959683614540729	10.5194/cp-10-1605-2014	www.ncdc.noaa.gov/paleo/study/15444		Peat	dD	leaf wax	isotope			d2H	d2H	permil	abs	P-E	@surface		annual	annual	negative	103	11116	213	1.27122	14.29	TRUE	CR		http://lipdverse.org/wNAm/0_15_0/Corser.Nichols.2014.html
CottonwoodPassPond.Fall.1997	Cottonwood Pass Pond	North America>United States Of America>Colorado	38.83	-106.41	3670	10.1130/0016-7606(1997)109<1306:TFALQP>2.3.CO;2	10.1038/nature25464	www.ncdc.noaa.gov/paleo/study/27330	10.21233/N33M6F	LakeSediment	pollen	assemblage	pollen	MAT			temperature	degC	abs	T	air@surface		warmest month	summer+	positive	-28	9437	267	0.316957	2	TRUE	TB	one age gap 3.3 ka	http://lipdverse.org/wNAm/0_15_0/CottonwoodPassPond.Fall.1997.html
CottonwoodPassPond.Fall.1997	Cottonwood Pass Pond	North America>United States Of America>Colorado	38.83	-106.41	3670	10.1130/0016-7606(1997)109<1306:TFALQP>2.3.CO;2	10.1038/nature25464	www.ncdc.noaa.gov/paleo/study/27330	10.21233/N33M6F	LakeSediment	pollen	assemblage	pollen	MAT			temperature	degC	abs	T	air@surface		coldest month	winter+	positive	-28	9437	267	0.316957	3	TRUE	TB	one age gap 3.3 ka	http://lipdverse.org/wNAm/0_15_0/CottonwoodPassPond.Fall.1997.html
CottonwoodPassPond.Fall.1997	Cottonwood Pass Pond	North America>United States Of America>Colorado	38.83	-106.41	3670	10.1130/0016-7606(1997)109<1306:TFALQP>2.3.CO;2	10.1038/nature25464	www.ncdc.noaa.gov/paleo/study/27330	10.21233/N33M6F	LakeSediment	pollen	assemblage	pollen	MAT			temperature	degC	abs	T	air@surface		annual	annual	positive	-28	9437	267	0.316957	2.1	TRUE	TB	one age gap 3.3 ka	http://lipdverse.org/wNAm/0_15_0/CottonwoodPassPond.Fall.1997.html
CottonwoodPassPond.Fall.1997	Cottonwood Pass Pond	North America>United States Of America>Colorado	38.83	-106.41	3670	10.1130/0016-7606(1997)109<1306:TFALQP>2.3.CO;2	10.1038/nature25464	www.ncdc.noaa.gov/paleo/study/27330	10.21233/N33M6F	LakeSediment	pollen	assemblage	pollen	MAT			precipitation	mm	abs	P	amount@surface		annual	annual	positive	-28	9437	267	0.316957	368	TRUE	JM	Pecipitation reconstruction generated with, and using methods described in Marsicek 2018. Reconstruction published as part of the wNAm database.	http://lipdverse.org/wNAm/0_15_0/CottonwoodPassPond.Fall.1997.html
Craterlake.Arcusa.2020	Crater Lake	North America>United States Of America>Colorado	37.6743	-106.695	3338	10.1177/0959683619875192		wNAm		LakeSediment	particle size	bulk sediment	biophysical				0.50_quantile_dust_flux	g/cm2/yr	abs	DUST	amount@surface		annual	annual	positive	94.2743	15754.3	157.524	0.923925	0	TRUE	SHA	no clear climate interpretation	http://lipdverse.org/wNAm/0_15_0/Craterlake.Arcusa.2020.html
CreviceLake.Whitlock.2012	Crevice Lake	North America>United States Of America>Montana	45	-110.58	1713	10.1016/j.palaeo.2012.03.001		wNAm		LakeSediment	d18O	calcite in bulk sediment	isotope				d18O	permil	abs	P	amount@srface		winter	winterOnly	negative	42	9201	10	1.201	1.42	TRUE	CR		http://lipdverse.org/wNAm/0_15_0/CreviceLake.Whitlock.2012.html
CreviceLake.Whitlock.2012	Crevice Lake	North America>United States Of America>Montana	45	-110.58	1713	10.1016/j.palaeo.2012.03.001		wNAm		LakeSediment	CaCO3	bulk sediment	biophysical				CaCO3	percent	abs	T	lake@surface		summer	summerOnly	positive	41.55	9403.79	10.27	1.17493	13.29	TRUE	CR		http://lipdverse.org/wNAm/0_15_0/CreviceLake.Whitlock.2012.html
CuevaDiablo.Bernal.2011	CuevaDiablo	North America>Mexico	18.18	-99.92	1030	10.1016/j.yqres.2010.09.002		www.ncdc.noaa.gov/paleo/study/10670		Speleothem	d18O	calcite	isotope			Amount effect: "the δ O record from CBD-2 is interpreted to primarily reflect changes in the oxygen isotope composition of local precipita- tion, specifically, the amount of rainfall"	d18O	permil	abs	P	amount@surface	monsoon	annual	annual	negative	1278	10870	58	0.938282	0.62	TRUE	CR	Has 3,470-year chronologgy gap. Fills important geographic region	http://lipdverse.org/wNAm/0_15_0/CuevaDiablo.Bernal.2011.html
CumbresBog.Johnson.2013	Cumbres Bog	North America>United States Of America>Colorado	37.0216	-106.45	3055	10.1177/0959683613479682		wNAm		LakeSediment	pollen	ratio	pollen			Indication for the position of lower treeline	Pinus/Artemisia	unitless	abs	T	air@surface		annual	annual	positive	273.65	20092	221.1	0.511668	0.23	TRUE	CR		http://lipdverse.org/wNAm/0_15_0/CumbresBog.Johnson.2013.html
CumbresBog.Johnson.2013	Cumbres Bog	North America>United States Of America>Colorado	37.0216	-106.45	3055	10.1177/0959683613479682		wNAm		LakeSediment	pollen	ratio	pollen			Ratio to relative shifts between the subalpine and the lower altitudinal steppe vegetation belts. A proxy for the elevation of treeline and the density of Picea subalpine forest	Picea/Artemisia	unitless	abs	T	air@surface		annual	annual	positive	273.65	20092	221.1	0.511668	0.23	TRUE	CR		http://lipdverse.org/wNAm/0_15_0/CumbresBog.Johnson.2013.html
CumbresBog.Johnson.2013	Cumbres Bog	North America>United States Of America>Colorado	37.0216	-106.45	3055	10.1177/0959683613479682		wNAm		LakeSediment	pollen	ratio	pollen			Indication for the position of upper treeline	Picea/Pinus	unitless	abs	T	air@surface		annual	annual	positive	273.65	20092	221.1	0.511668	0.15	TRUE	CR		http://lipdverse.org/wNAm/0_15_0/CumbresBog.Johnson.2013.html
CumbresBog.Johnson.2013	Cumbres Bog	North America>United States Of America>Colorado	37.0216	-106.45	3055	10.1177/0959683613479682		wNAm		LakeSediment	pollen	single species	pollen			Pinus edulis: a good approximate of changes in winter precipitation.	Pinyon	percent	abs	P-E	@surface		winter	winterOnly	positive	273.65	20092	221.1	0.511668	1.3	TRUE	CR		http://lipdverse.org/wNAm/0_15_0/CumbresBog.Johnson.2013.html
DempsterPeatland.Porter.2019	Dempster Highway Peatland	North America>Canada>Yukon Territory	65.21	-138.32	740	10.1038/s41467-019-09622-y		www.ncdc.noaa.gov/paleo/study/27330		Ice-other	d18O	pore ice	isotope			temperature anomalies relative to Holocene mean.	temperature	degC	anom	T	air@surface		summer	summerOnly	positive	-63	13585	150	1.16057	2.1	TRUE	DSK		http://lipdverse.org/wNAm/0_15_0/DempsterPeatland.Porter.2019.html
DJ6-93SF-6.McGann.2008	DJ6-93SF-6	Pacific Ocean>North Pacific Ocean	37.63	-122.37	-4	10.2112/08A-0003.1		wNAm		MarineSediment	Mg/Ca	single species	Mg/Ca			"y = 4.4289 ln(x) + 11.682, where y water temperature in C and x the Mg/Ca ratio"; foram E. excavatum	temperature	degC	abs	T	sea@surface		annual	annual	positive	100	3840	85	2.94118	1.9	TRUE	CR, SHA	Shorter than 4000 years (oldest age at 3840 yr BP)	http://lipdverse.org/wNAm/0_15_0/DJ6-93SF-6.McGann.2008.html
DSDP480.Barron.2004	DSDP site 480	Pacific Ocean>North Pacific Ocean	27.9	-111.65	-655	10.1016/S0377-8398(03)00071-9		www.ncdc.noaa.gov/paleo/study/5855		MarineSediment	diatom	single species	other microfossil			"Actinocyclus curvatulus is an early winter taxon indicative of upwelling mixed waters according to Sancetta (1995)."	Actinocyclus_curvatulus	percent	abs	upwelling	upwelling@surface		winter	winterOnly	positive	1330	15185.7	43.86	0.374883	8.03	TRUE	SHA	Lat/lon updated from NOAA webpage	http://lipdverse.org/wNAm/0_15_0/DSDP480.Barron.2004.html
DSDP480.Barron.2004	DSDP site 480	Pacific Ocean>North Pacific Ocean	27.9	-111.65	-655	10.1016/S0377-8398(03)00071-9		www.ncdc.noaa.gov/paleo/study/5855		MarineSediment	diatom	single species	other microfossil			"Azpeitia nodulifera, an indicator of El Nino conditions in the modern-day Gulf of California"	Azpeitia_nodulifer	percent	abs	MODE	elNino	el nino	annual	annual	positive	1330	15185.7	43.86	0.374883	16.49	TRUE	SHA	Lat/lon updated from NOAA webpage	http://lipdverse.org/wNAm/0_15_0/DSDP480.Barron.2004.html
DSDP480.Barron.2004	DSDP site 480	Pacific Ocean>North Pacific Ocean	27.9	-111.65	-655	10.1016/S0377-8398(03)00071-9		www.ncdc.noaa.gov/paleo/study/5855		MarineSediment	diatom	single species	other microfossil			"diatoms and silico£agellates that are associated with winter-spring upwelling (Roperia tesselata, Octactis pulchra)."	Roperia_tesselata	percent	abs	upwelling	@surface		winter	winterOnly	positive	1330	15185.7	43.86	0.374883	2.94	TRUE	SHA	Lat/lon updated from NOAA webpage	http://lipdverse.org/wNAm/0_15_0/DSDP480.Barron.2004.html
DSDP480.Barron.2004	DSDP site 480	Pacific Ocean>North Pacific Ocean	27.9	-111.65	-655	10.1016/S0377-8398(03)00071-9		www.ncdc.noaa.gov/paleo/study/5855		MarineSediment	diatom	singel species	other microfossil			"diatoms and silico£agellates that are associated with winter-spring upwelling (Roperia tesselata, Octactis pulchra)." indicative of high productivity	Octactis_pulchra_(lrg)	percent	abs	upwelling	@surface		winter	winterOnly	positive	1370	15150	50	0.376294	2.22	TRUE	SHA	Lat/lon updated from NOAA webpage	http://lipdverse.org/wNAm/0_15_0/DSDP480.Barron.2004.html
DSDP480.Barron.2004	DSDP site 480	Pacific Ocean>North Pacific Ocean	27.9	-111.65	-655	10.1016/S0377-8398(03)00071-9		www.ncdc.noaa.gov/paleo/study/5855		MarineSediment	CaCO3	bulk sediment	biophysical			tropical conditions "decline of CaCO3 below 5 wt% at V10 ka sig- naled a rapid decline of tropical conditions in the central Gulf."	CaCO3	percent	abs	upwelling	@surface		winter	winterOnly	negative	1334.4	15190.2	87.7	0.375038	7.81	TRUE	SHA	Lat/lon updated from NOAA webpage	http://lipdverse.org/wNAm/0_15_0/DSDP480.Barron.2004.html
DSDP480.Barron.2004	DSDP site 480	Pacific Ocean>North Pacific Ocean	27.9	-111.65	-655	10.1016/S0377-8398(03)00071-9		www.ncdc.noaa.gov/paleo/study/5855		MarineSediment	BSi	bulk sediment	biophysical			"Enhanced winter time northwest winds lead to increasing biogenic silica deposition" and "causing enhanced coastal upwelling on the mainland side of the central Gulf."	BSi	percent	abs	upwelling	@surface		winter	winterOnly	positive	1334.4	15190.2	87.7	0.375038	0.48	TRUE	SHA	Lat/lon updated from NOAA webpage	http://lipdverse.org/wNAm/0_15_0/DSDP480.Barron.2004.html
Dune.Finney.2012	Dune Lake	North America>United States Of America>Alaska	64.42	-149.9	134	10.1007/s10933-012-9617-2		www.ncdc.noaa.gov/paleo/study/13076		LakeSediment	d13C	organic carbon in bulk sediment	isotope			"Variability in groundwater level and flux has a strong control on lake level and are negatively correlated with the d13C of organic matter produced within the lake."	d13C	permil	abs	P-E	groundWaterLevel		annual	annual	negative	-42.503	11326.4	16.686	1.58327	1.96	TRUE	SHA		http://lipdverse.org/wNAm/0_15_0/Dune.Finney.2012.html
Eldora.Maher.1969	Eldora Fen	North America>United States Of America>Colorado	39.94	-105.58	2848	noPubOnRecord	10.1038/nature25464	www.ncdc.noaa.gov/paleo/study/27330	10.21233/N30H6G	LakeSediment	pollen	assemblage	pollen	MAT			temperature	degC	abs	T	air@surface		warmest month	summer+	positive	9	8639.9	175.4	0.695177	2	TRUE	TB		http://lipdverse.org/wNAm/0_15_0/Eldora.Maher.1969.html
Eldora.Maher.1969	Eldora Fen	North America>United States Of America>Colorado	39.94	-105.58	2848	noPubOnRecord	10.1038/nature25464	www.ncdc.noaa.gov/paleo/study/27330	10.21233/N30H6G	LakeSediment	pollen	assemblage	pollen	MAT			temperature	degC	abs	T	air@surface		coldest month	winter+	positive	9	8639.9	175.4	0.695177	3	TRUE	TB		http://lipdverse.org/wNAm/0_15_0/Eldora.Maher.1969.html
Eldora.Maher.1969	Eldora Fen	North America>United States Of America>Colorado	39.94	-105.58	2848	noPubOnRecord	10.1038/nature25464	www.ncdc.noaa.gov/paleo/study/27330	10.21233/N30H6G	LakeSediment	pollen	assemblage	pollen	MAT			temperature	degC	abs	T	air@surface		annual	annual	positive	9	8639.9	175.4	0.695177	2.1	TRUE	TB		http://lipdverse.org/wNAm/0_15_0/Eldora.Maher.1969.html
Eldora.Maher.1969	Eldora Fen	North America>United States Of America>Colorado	39.94	-105.58	2848	noPubOnRecord	10.1038/nature25464	www.ncdc.noaa.gov/paleo/study/27330	10.21233/N30H6G	LakeSediment	pollen	assemblage	pollen	MAT			precipitation	mm	abs	P	amount@surface		annual	annual	positive	9	8639.9	175.4	0.695177	368	TRUE	JM	Pecipitaition reconstruction generated with, and using methods described in Marsicek 2018. Reconstruction published as part of the wNAm database.	http://lipdverse.org/wNAm/0_15_0/Eldora.Maher.1969.html
Eleanor.Gavin.2011	Eleanor Lake	North America>United States Of America>Washington	47.68	-124.02	710	10.1016/j.quascirev.2011.03.003		wNAm		LakeSediment	BSi	bulk sediment	biophysical			BSi	temperature	percent	abs	T	air@surface		summer	summerOnly	positive	-48.9	10877.1	18.9	1.18982	1.27	TRUE	DSK, DG		http://lipdverse.org/wNAm/0_15_0/Eleanor.Gavin.2011.html
Elsinore.Kirby.2019	Lake Elsinore	North America>United States Of America>California	33.6733	-117.354	379	10.3389/feart.2019.00074		www.ncdc.noaa.gov/paleo/study/30232		LakeSediment	d18O	bulk sediment	isotope			Amount effect	d18O	permil	abs	P	amount@surface		summer	summerOnly	negative	-43.7	10895	14.6	2.37688	1.08	TRUE	MEK		http://lipdverse.org/wNAm/0_15_0/Elsinore.Kirby.2019.html
Elsinore.Kirby.2019	Lake Elsinore	North America>United States Of America>California	33.6733	-117.354	379	10.3389/feart.2019.00074		www.ncdc.noaa.gov/paleo/study/30232		LakeSediment	particle size	bulk sediment	biophysical				sand	percent	abs	P	runoff@surface		winter	winterOnly	positive	-43.7	10895	10.2	2.37688	0.96	TRUE	MEL	Recalculated age model on data from Kirby et al., 2010	http://lipdverse.org/wNAm/0_15_0/Elsinore.Kirby.2019.html
Emerald.Shuman.2014	Emerald Lake	North America>United States Of America>Colorado	39.152	-106.406	3053	10.2113/gsrocky.49.1.33		www.ncdc.noaa.gov/paleo/study/23079		LakeSediment	stratigraphy	core transect	biophysical			Elevation below modern	lakeLevel	cm	abs	P-E	lakeLevel@surface		annual	annual	negative	250	11900	50	2.14592	0.61	TRUE	CR		http://lipdverse.org/wNAm/0_15_0/Emerald.Shuman.2014.html
EmeraldLake.JimenezMoreno.2019	Emerald Lake	North America>United States Of America>Colorado	39.1518	-106.406	3053	10.1016/j.quascirev.2019.03.013		wNAm	41614	LakeSediment	pollen	single species	pollen			Pinus edulis: a good approximate of changes in winter precipitation.	Pinyon	percent	abs	P-E	@surface		winter	winterOnly	positive	-64	10252	156	0.872431	0.69	TRUE	CR		http://lipdverse.org/wNAm/0_15_0/EmeraldLake.JimenezMoreno.2019.html
EmeraldLake.JimenezMoreno.2019	Emerald Lake	North America>United States Of America>Colorado	39.1518	-106.406	3053	10.1016/j.quascirev.2019.03.013		wNAm	41614	LakeSediment	pollen	ratio	pollen			Ratio to relative shifts between the subalpine and the lower altitudinal steppe vegetation belts. A proxy for the elevation of treeline and the density of Picea subalpine forest	Picea/Artemesia	unitless	abs	T	air@surface		annual	annual	positive	-64	10252	156	0.872431	0.84	TRUE	CR		http://lipdverse.org/wNAm/0_15_0/EmeraldLake.JimenezMoreno.2019.html
EmeraldLake.JimenezMoreno.2019	Emerald Lake	North America>United States Of America>Colorado	39.1518	-106.406	3053	10.1016/j.quascirev.2019.03.013		wNAm	41614	LakeSediment	pollen	ratio	pollen			Indication for the position of upper treeline	Picea/Pinus	unitless	abs	T	air@surface		annual	annual	positive	-64	10252	156	0.872431	0.77	TRUE	CR		http://lipdverse.org/wNAm/0_15_0/EmeraldLake.JimenezMoreno.2019.html
EmeraldLake.JimenezMoreno.2019	Emerald Lake	North America>United States Of America>Colorado	39.1518	-106.406	3053	10.1016/j.quascirev.2019.03.013		wNAm	41614	LakeSediment	pollen	several species	pollen				quercus_juniperus_cercocarpus	percent	abs	T	air@surface		annual	annual	positive	-64	10252	156	0.872431	59.11	TRUE	CR		http://lipdverse.org/wNAm/0_15_0/EmeraldLake.JimenezMoreno.2019.html
EN32_PC6.Flower.2004	EN32_PC6	Atlantic Ocean>North Atlantic Ocean>Gulf Of Mexico	26.946	-91.35	-2280	10.1130/G20604.1	www.geosociety.org/datarepository/2004/2004095.pdf	www.ncdc.noaa.gov/paleo/study/27330		MarineSediment	Mg/Ca	ruber	Mg/Ca	Baymag (baymag_predict.m) github.com/jesstierney/BAYMAG Parameters: omega=1.5207, salinity=35.0236, pH=8.0316, clean=0, species=ruber, pstd=10, varargin=0			temperature	degC	abs	T	sea@surface		4 5 6 7 8 9 10 12	annual	positive	8330	22210	300	1.3624	1.9	TRUE	JET, DSK	youngest = 8.3 ka; accept to improve subtropical coverage	http://lipdverse.org/wNAm/0_15_0/EN32_PC6.Flower.2004.html
EN32_PC6.Flower.2004	EN32_PC6	Atlantic Ocean>North Atlantic Ocean>Gulf Of Mexico	26.946	-91.35	-2280	10.1130/G20604.1	www.geosociety.org/datarepository/2004/2004095.pdf	www.ncdc.noaa.gov/paleo/study/27330		MarineSediment	d18O	ruber	isotope	Bayfoxm (byfox_predict.m) 10.1029/2019PA003576 Parameters: prior_mean=26.7011, prior_std=10, species=ruber, bayes=unspecified; For d18osw, values are specified to change through time, and are calculated using the getvardelo.m program from Jess Tierney, based on the modern value of d18osw (0.73415) for the archive location			temperature	degC	abs	T	sea@surface		annual	annual	positive	8330	22210	290	1.3624	2.1	TRUE	JET, DSK	youngest = 8.3 ka; accept to improve subtropical coverage	http://lipdverse.org/wNAm/0_15_0/EN32_PC6.Flower.2004.html
EnosLake.Brown.2006	Enos Lake	North America>Canada>British Columbia	49.28	-124.15	46	10.1016/j.quascirev.2006.02.020		wNAm		LakeSediment	pollen	assemblage	pollen	DWHI-MAP		MAP_update	precipitation	mm	abs	P	amount@surface		annual	annual	positive	-45	10473	152	0.760601	368	TRUE	KJB, SHA	Lat/lon updated to four decimals with Google Earth	http://lipdverse.org/wNAm/0_15_0/EnosLake.Brown.2006.html
EW0408_66JC.Praetorius.2015	EW0408_66JC	((( null ))) Pacific Ocean>North Pacific Ocean /// Pacific Ocean>North Pacific Ocean>Gulf Of Alaska	57.8724	-137.105	-426	10.1038/nature15753		www.ncdc.noaa.gov/paleo/study/22400		MarineSediment	alkenone	UK37	alkenone	Bayspline (UK_predict.m) 10.1002/2017PA003201 Parameters: pstd=10, bayes=unspecified			temperature	degC	abs	T	sea@surface		2008-06-07	summerOnly	positive	4380.62	13573.8	120	2.62489	1.7	TRUE	JET, DSK		http://lipdverse.org/wNAm/0_15_0/EW0408_66JC.Praetorius.2015.html
EW0408_66JC.Praetorius.2015	EW0408_66JC	((( null ))) Pacific Ocean>North Pacific Ocean /// Pacific Ocean>North Pacific Ocean>Gulf Of Alaska	57.8724	-137.105	-426	10.1038/nature15753		www.ncdc.noaa.gov/paleo/study/22400		MarineSediment	d18O	pachyderma	isotope	Bayfoxm (byfox_predict.m) 10.1029/2019PA003576 Parameters: prior_mean=8.878, prior_std=10, species=pachy, bayes=unspecified; For d18osw, values are specified to change through time, and are calculated using the getvardelo.m program from Jess Tierney, based on the modern value of d18osw (-0.93822) for the archive location			temperature	degC	abs	T	sea@surface		annual	annual	positive	4246	13570	14	2.57931	2.1	TRUE	JET, DSK		http://lipdverse.org/wNAm/0_15_0/EW0408_66JC.Praetorius.2015.html
EW0408_85JC.Praetorius.2015	EW0408_85JC	Pacific Ocean>North Pacific Ocean>Gulf Of Alaska	59.5554	-144.154	-682	10.1038/nature15753	10.1016/j.epsl.2014.04.004	www.ncdc.noaa.gov/paleo/study/21950		MarineSediment	alkenone	UK37	alkenone	Bayspline (UK_predict.m) 10.1002/2017PA003201 Parameters: pstd=10, bayes=unspecified			temperature	degC	abs	T	sea@surface		2008-06-07	summerOnly	positive	1039	17390	149	1.82465	1.7	TRUE	PMS, DSK, JET		http://lipdverse.org/wNAm/0_15_0/EW0408_85JC.Praetorius.2015.html
EW0408_85JC.Praetorius.2015	EW0408_85JC	Pacific Ocean>North Pacific Ocean>Gulf Of Alaska	59.5554	-144.154	-682	10.1038/nature15753	10.1016/j.epsl.2014.04.004	www.ncdc.noaa.gov/paleo/study/21950		MarineSediment	d18O	pachyderma	isotope	Bayfoxm (byfox_predict.m) 10.1029/2019PA003576 Parameters: prior_mean=8.2693, prior_std=10, species=pachy, bayes=unspecified; For d18osw, values are specified to change through time, and are calculated using the getvardelo.m program from Jess Tierney, based on the modern value of d18osw (-0.95101) for the archive location			temperature	degC	abs	T	sea@surface		annual	annual	positive	993.737	17370	75.041	1.81715	2.1	TRUE	JET, DSK		http://lipdverse.org/wNAm/0_15_0/EW0408_85JC.Praetorius.2015.html
EW0408_85JC.Praetorius.2015	EW0408_85JC	Pacific Ocean>North Pacific Ocean>Gulf Of Alaska	59.5554	-144.154	-682	10.1038/nature15753	10.1016/j.epsl.2014.04.004	www.ncdc.noaa.gov/paleo/study/21950		MarineSediment	d18O	bulloides	isotope	Bayfoxm (byfox_predict.m) 10.1029/2019PA003576 Parameters: prior_mean=8.2693, prior_std=10, species=bulloides, bayes=unspecified; For d18osw, values are specified to change through time, and are calculated using the getvardelo.m program from Jess Tierney, based on the modern value of d18osw (-0.95101) for the archive location			temperature	degC	abs	T	sea@surface		annual	annual	positive	993.737	17261	75.041	1.81715	2.1	TRUE	JET, DSK		http://lipdverse.org/wNAm/0_15_0/EW0408_85JC.Praetorius.2015.html
EW0408-87JC.Praetorius.2020	EW0408-87JC	Pacific Ocean>North Pacific Ocean>Gulf Of Alaska	58.77	-144.5	3680	10.1126/sciadv.aay2915		wNAm		MarineSediment	alkenone	UK37	alkenone				temperature	degC	abs	T	sea@surface		annual	annual	positive	9.74359	17771.3	443.84	0.583807	1.7	TRUE	SHA		http://lipdverse.org/wNAm/0_15_0/EW0408-87JC.Praetorius.2020.html
Farewell.Hu.1998	Farewell Lake	North America>United States Of America>Alaska	62.55	-153.63	230	10.1006/qres.1997.1936	10.5194/cp-10-1605-2014	www.ncdc.noaa.gov/paleo/study/15444		LakeSediment	Mg/Ca	ostracode	Mg/Ca			Mg/Ca	temperature	mmol/mol	abs	T	lake@surface		summer	summerOnly	positive	-49.971	12517.3	192.281	0.497927	1.66	TRUE	DSK		http://lipdverse.org/wNAm/0_15_0/Farewell.Hu.1998.html
FelkerLake.Galloway.2011	Felker Lake	North America>Canada>British Columbia	51.95	-121.995	862	10.1007/s10933-010-9490-9		wNAm	21284	LakeSediment	diatom	assemblage	other microfossil				salinity	mg/L	abs	P-E	lake@surface		annual	annual	negative	-36.4	10688.7	141.7	0.652675	66.3	TRUE	CR		http://lipdverse.org/wNAm/0_15_0/FelkerLake.Galloway.2011.html
FelkerLake.Galloway.2011	Felker Lake	North America>Canada>British Columbia	51.95	-121.995	862	10.1007/s10933-010-9490-9		wNAm	21284	LakeSediment	diatom	assemblage	other microfossil				lakeLevel	m	abs	P-E	lakeLevel@surface		annual	annual	positive	-36.4	10688.7	141.7	0.652675	1.41	TRUE	CR		http://lipdverse.org/wNAm/0_15_0/FelkerLake.Galloway.2011.html
Ferndale.Albert.1981	Ferndale	North America>United States Of America>Oklahoma	34.41	-95.81	263	Albert, L.E., and D.G. Wyckoff, editors. 1981. Ferndale Bog and Natural Lake: five thousand years of environmental change in southeastern Oklahoma. Studies in Oklahoma's Past 7. Oklahoma Archaeological Survey, Norman, Oklahoma, USA.	10.1038/nature25464	www.ncdc.noaa.gov/paleo/study/27330	10.21233/N3W91K	LakeSediment	pollen	assemblage	pollen	MAT			temperature	degC	abs	T	air@surface		warmest month	summer+	positive	0	7362	50	0.407498	2	TRUE	TB		http://lipdverse.org/wNAm/0_15_0/Ferndale.Albert.1981.html
Ferndale.Albert.1981	Ferndale	North America>United States Of America>Oklahoma	34.41	-95.81	263	Albert, L.E., and D.G. Wyckoff, editors. 1981. Ferndale Bog and Natural Lake: five thousand years of environmental change in southeastern Oklahoma. Studies in Oklahoma's Past 7. Oklahoma Archaeological Survey, Norman, Oklahoma, USA.	10.1038/nature25464	www.ncdc.noaa.gov/paleo/study/27330	10.21233/N3W91K	LakeSediment	pollen	assemblage	pollen	MAT			temperature	degC	abs	T	air@surface		coldest month	winter+	positive	0	7362	50	0.407498	3	TRUE	TB		http://lipdverse.org/wNAm/0_15_0/Ferndale.Albert.1981.html
Ferndale.Albert.1981	Ferndale	North America>United States Of America>Oklahoma	34.41	-95.81	263	Albert, L.E., and D.G. Wyckoff, editors. 1981. Ferndale Bog and Natural Lake: five thousand years of environmental change in southeastern Oklahoma. Studies in Oklahoma's Past 7. Oklahoma Archaeological Survey, Norman, Oklahoma, USA.	10.1038/nature25464	www.ncdc.noaa.gov/paleo/study/27330	10.21233/N3W91K	LakeSediment	pollen	assemblage	pollen	MAT			temperature	degC	abs	T	air@surface		annual	annual	positive	0	7362	50	0.407498	2.1	TRUE	TB		http://lipdverse.org/wNAm/0_15_0/Ferndale.Albert.1981.html
Ferndale.Albert.1981	Ferndale	North America>United States Of America>Oklahoma	34.41	-95.81	263	Albert, L.E., and D.G. Wyckoff, editors. 1981. Ferndale Bog and Natural Lake: five thousand years of environmental change in southeastern Oklahoma. Studies in Oklahoma's Past 7. Oklahoma Archaeological Survey, Norman, Oklahoma, USA.	10.1038/nature25464	www.ncdc.noaa.gov/paleo/study/27330	10.21233/N3W91K	LakeSediment	pollen	assemblage	pollen	MAT			precipitation	mm	abs	P	amount@surface		annual	annual	positive	0	7362	50	0.407498	368	TRUE	JM	Pecipitation reconstruction generated with, and using methods described in Marsicek 2018. Reconstruction published as part of the wNAm database.	http://lipdverse.org/wNAm/0_15_0/Ferndale.Albert.1981.html
FoyLake.Stone.2008	FoyLake	North America>United States Of America>Montana	48.2	-114.4	1006	10.1130/G22225.1		www.ncdc.noaa.gov/paleo/study/6188	41761	LakeSediment	diatom	benthon	other microfossil				benth	fraction	abs	P-E	lakeLevel@surface		annual	annual	negative	1912.5	15095.1	6	0.892193	0.4	TRUE	CR	drought infered from lake level and benthic diatom. Seasonality not specified. Assumed annual	http://lipdverse.org/wNAm/0_15_0/FoyLake.Stone.2008.html
Frozen.Rosenberg.2004	Frozen Lake	North America>Canada>British Columbia	49.6	-121.467	1180	10.1191/0959683604hl703rp	10.1890/12-1742.1	www.ncdc.noaa.gov/paleo/study/27330		LakeSediment	chironomid	assemblage	chironomid	WAPLS	7	51 lakes from British Columbia (Palmer et al. 2002)	temperature	degC	abs	T	air@surface		summer	summerOnly	positive	-127.935	11426.5	241.725	0.865467	1.4	TRUE	DSK, MTO, IRW	data from Dan Gavin; untenable minimum age	http://lipdverse.org/wNAm/0_15_0/Frozen.Rosenberg.2004.html
GGC19.Farmer.2011	GGC19	Arctic Ocean	72.16	-155.51	-369	10.1029/2011GL049714	10.5194/cp-10-1605-2014	www.ncdc.noaa.gov/paleo/study/15444		MarineSediment	dinocyst	assemblage	other microfossil				temperature	degC	abs	T	sea@surface		summer	summer+	positive	415.43	6511.9	134	1.47626	1.7	TRUE	SLJ	the data set includes winter SST + Summer SST and sea ice, The last column is the average of summer and winter	http://lipdverse.org/wNAm/0_15_0/GGC19.Farmer.2011.html
GGC19.Farmer.2011	GGC19	Arctic Ocean	72.16	-155.51	-369	10.1029/2011GL049714	10.5194/cp-10-1605-2014	www.ncdc.noaa.gov/paleo/study/15444		MarineSediment	dinocyst	assemblage	other microfossil			Sea_Ice_months	seaIce	months/year	abs	ICE	sea@surface		annual	annual	positive	415.43	6511.9	134	1.47626	1.99	TRUE	CR		http://lipdverse.org/wNAm/0_15_0/GGC19.Farmer.2011.html
GGC19.Farmer.2011	GGC19	Arctic Ocean	72.16	-155.51	-369	10.1029/2011GL049714	10.5194/cp-10-1605-2014	www.ncdc.noaa.gov/paleo/study/15444		MarineSediment	dinocyst	assemblage	other microfossil				temperature	degC	abs	T	sea@surface		warmest + coldest	annual	positive	415.43	6511.9	134	1.47626	1.2	TRUE	SLJ	data includes winter SST + Summer SST and sea ice; the last column is the average of summer and winter	http://lipdverse.org/wNAm/0_15_0/GGC19.Farmer.2011.html
GGC55_JPC56.Barron.2005	GGC55_JPC56	Pacific Ocean>North Pacific Ocean	27.47	-112.1	-820	10.1016/j.marmicro.2005.04.001		www.ncdc.noaa.gov/paleo/study/5915		MarineSediment	diatom	single species	other microfossil			"Actinocyclus curvatulus is an early winter taxon indicative of upwelling mixed waters according to Sancetta (1995)"	Actinocyclus_curvatulus	percent	abs	upwelling	sea@surface		winter	winterOnly	negative	2190.5	15360	102.3	0.917478	3.94	TRUE	SHA		http://lipdverse.org/wNAm/0_15_0/GGC55_JPC56.Barron.2005.html
GreatBasin.Salzer.2014	Great Basin	North America>United States Of America>Nevada	38	-116.5	0	10.1007/s00382-013-1911-9		www.ncdc.noaa.gov/paleo/study/17056		Wood	TRW	tree ring width	biophysical			Great basin site average. Surface Temperature Anomaly - Adjusted, , , degrees C, July-September, , , ,N	temperature	degC	anom	T	air@surface		2009-07-08	summer+	positive	-56	4524	1		2.1	TRUE	DSK	Integrating several tree sites to generate continuous time series	http://lipdverse.org/wNAm/0_15_0/GreatBasin.Salzer.2014.html
greyling.Mckay.2009	greyling	North America>United States Of America>Alaska	61.3813	-145.737	1015	10.1007/s10933-008-9260-0		www.ncdc.noaa.gov/paleo/study/15444		LakeSediment	TOC	bulk sediment	biophysical			OM	organic	percent	abs	ELA	glacierExtent		annual	annual	negative	-29	18127	102	0.498795	1.49	TRUE	SHA	Lat/lon updated to four decimals with Google Earth	http://lipdverse.org/wNAm/0_15_0/greyling.Mckay.2009.html
Grutas.Winter.2020	Grutas del Ray Marcos	North America>Central America>Guatemala	15.4277	-90.2807	1466	10.1038/s41467-020-14490-y		www.ncdc.noaa.gov/paleo/study/28351		Speleothem	d18O	calcite	isotope			Amount effect	d18O	permil	abs	P	amount@surface		annual	annual	negative	343	12778	13	1.80149	0.28	TRUE	CR		http://lipdverse.org/wNAm/0_15_0/Grutas.Winter.2020.html
Hail.Cwynar.1995	Hail Lake	North America>Canada>Yukon Territory	60.03	-129.02	690	10.7202/033027ar	10.5194/cp-10-1605-2014	www.ncdc.noaa.gov/paleo/study/15444	10.21233/N31D9W	LakeSediment	pollen	assemblage	pollen	MAT			temperature	degC	anom	T	air@surface		coldest month	winterOnly	positive	67	11334	138	0.710038	3	TRUE	TB		http://lipdverse.org/wNAm/0_15_0/Hail.Cwynar.1995.html
Hail.Cwynar.1995	Hail Lake	North America>Canada>Yukon Territory	60.03	-129.02	690	10.7202/033027ar	10.5194/cp-10-1605-2014	www.ncdc.noaa.gov/paleo/study/15444	10.21233/N31D9W	LakeSediment	pollen	assemblage	pollen				precipitation	mm	anom	P	amount@surface		annual	annual	positive	67	11334	138	0.710038	368	TRUE	CR		http://lipdverse.org/wNAm/0_15_0/Hail.Cwynar.1995.html
Hail.Cwynar.1995	Hail Lake	North America>Canada>Yukon Territory	60.03	-129.02	690	10.7202/033027ar	10.5194/cp-10-1605-2014	www.ncdc.noaa.gov/paleo/study/15444	10.21233/N31D9W	LakeSediment	pollen	assemblage	pollen	MAT			temperature	degC	anom	T	air@surface		warmest month	summerOnly	positive	67	9918	185	0.8121	2	TRUE	TB		http://lipdverse.org/wNAm/0_15_0/Hail.Cwynar.1995.html
Hallet.McKay.2009	Hallet Lake	North America>United States Of America>Alaska	61.4919	-146.239	1128	10.1007/s10933-008-9260-0	10.5194/cp-10-1605-2014	www.ncdc.noaa.gov/paleo/study/15444		LakeSediment	TOC	bulk sediment	biophysical			OM	organic	percent	abs	ELA	glacierExtent		annual	annual	negative	-52	7913	31	1.38104	3.2	TRUE	SHA	Lat/lon updated to four decimals with Google Earth	http://lipdverse.org/wNAm/0_15_0/Hallet.McKay.2009.html
Hallet.McKay.2009	Hallet Lake	North America>United States Of America>Alaska	61.4919	-146.239	1128	10.1007/s10933-008-9260-0	10.5194/cp-10-1605-2014	www.ncdc.noaa.gov/paleo/study/15444		LakeSediment	BSi	bulk sediment	biophysical				BSi	percent	abs	T	air@surface		summer	summerOnly	positive	-55.103	8193.5	11.7235	1.33356	127.92	TRUE	DSK, SHA	Lat/lon updated to four decimals with Google Earth	http://lipdverse.org/wNAm/0_15_0/Hallet.McKay.2009.html
Hanging.Cwynar.1982	Hanging Lake	North America>Canada>Yukon Territory	68.38	-138.38	500	10.2307/2937342	10.1038/nature25464	www.ncdc.noaa.gov/paleo/study/27330	10.21233/N35S6S	LakeSediment	pollen	assemblage	pollen	MAT			temperature	degC	abs	T	air@surface		warmest month	summer+	positive	0	10279.7	260	2.04286	2	TRUE	DSK	age gap 4.8 ka; include because ages are all veg macrofossils and because proxies include both pollen and chrionomids	http://lipdverse.org/wNAm/0_15_0/Hanging.Cwynar.1982.html
Hanging.Cwynar.1982	Hanging Lake	North America>Canada>Yukon Territory	68.38	-138.38	500	10.2307/2937342	10.1038/nature25464	www.ncdc.noaa.gov/paleo/study/27330	10.21233/N35S6S	LakeSediment	pollen	assemblage	pollen	MAT			temperature	degC	abs	T	air@surface		coldest month	winter+	positive	0	10279.7	260	2.04286	3	TRUE	DSK	age gap 4.8 ka; include because ages are all veg macrofossils and because proxies include both pollen and chrionomids	http://lipdverse.org/wNAm/0_15_0/Hanging.Cwynar.1982.html
Hanging.Cwynar.1982	Hanging Lake	North America>Canada>Yukon Territory	68.38	-138.38	500	10.2307/2937342	10.1038/nature25464	www.ncdc.noaa.gov/paleo/study/27330	10.21233/N35S6S	LakeSediment	pollen	assemblage	pollen	MAT			temperature	degC	abs	T	air@surface		annual	annual	positive	0	10279.7	260	2.04286	2.1	TRUE	DSK	age gap 4.8 ka; include because ages are all veg macrofossils and because proxies include both pollen and chrionomids	http://lipdverse.org/wNAm/0_15_0/Hanging.Cwynar.1982.html
Harding.Finkenbinder.2014	Harding Lake	North America>United States Of America>Alaska	64.42	-146.85	217	10.1016/j.quascirev.2014.01.005		www.ncdc.noaa.gov/paleo/study/15655		LakeSediment	TOC	bulk sediment	biophysical			"Shallow water sediments are characterized by high magnetic susceptibility and low organic matter."	TOC	percent	abs	P-E	lakeLevel@surface		annual	annual	positive	-56	31639	48	0.0829463	1.6	TRUE	SHA		http://lipdverse.org/wNAm/0_15_0/Harding.Finkenbinder.2014.html
Harding.Finkenbinder.2014	Harding Lake	North America>United States Of America>Alaska	64.42	-146.85	217	10.1016/j.quascirev.2014.01.005		www.ncdc.noaa.gov/paleo/study/15655		LakeSediment	MS	bulk sediment	biophysical			"Shallow water sediments are characterized by high magnetic susceptibility and low organic matter."	MS	unitless	abs	P-E	lakeLevel@surface		annual	annual	negative	88.2	32617	9.6	0.0839504	2.6	TRUE	SHA		http://lipdverse.org/wNAm/0_15_0/Harding.Finkenbinder.2014.html
HealLake.Brown.2006	Heal Lake	North America>Canada>British Columbia	48.54	-123.46	137	10.1016/j.quascirev.2006.02.020		wNAm		LakeSediment	pollen	assemblage	pollen	DWHI-MAP		MAP_updated	precipitation	mm	abs	P	amount@surface		annual	annual	positive	-42	11668	187	0.683177	368	TRUE	KJB		http://lipdverse.org/wNAm/0_15_0/HealLake.Brown.2006.html
HermitLake.Anderson.2018	Hermit Lake	North America>United States Of America>Colorado	38.0879	-105.631	3455	10.1130/2018.2536(13)		wNAm	46799	LakeSediment	pollen	single species	pollen			Pinus edulis: a good approximate of changes in winter precipitation.	Pinyon	percent	abs	P-E	@surface		winter	winterOnly	positive	-50	110215	230	0.6639	3.41	TRUE	CR		http://lipdverse.org/wNAm/0_15_0/HermitLake.Anderson.2018.html
HermitLake.Anderson.2018	Hermit Lake	North America>United States Of America>Colorado	38.0879	-105.631	3455	10.1130/2018.2536(13)		wNAm	46799	LakeSediment	pollen	ratio	pollen			Indication for the position of upper treeline	Picea/Pinus	unitless	abs	T	air@surface		annual	annual	positive	-50	110215	230	0.6639	3.01	TRUE	CR	This pollen ratio time series was generated for the wNAm database.	http://lipdverse.org/wNAm/0_15_0/HermitLake.Anderson.2018.html
HermitLake.Anderson.2018	Hermit Lake	North America>United States Of America>Colorado	38.0879	-105.631	3455	10.1130/2018.2536(13)		wNAm	46799	LakeSediment	pollen	ratio	pollen			Indication for the relative position of lower treeline	Pinus/Artemisia	unitless	abs	T	air@surface		annual	annual	positive	-50	110215	230	0.6639	303.76	TRUE	CR	This pollen ratio time series was generated for the wNAm database.	http://lipdverse.org/wNAm/0_15_0/HermitLake.Anderson.2018.html
HermitLake.Anderson.2018	Hermit Lake	North America>United States Of America>Colorado	38.0879	-105.631	3455	10.1130/2018.2536(13)		wNAm	46799	LakeSediment	pollen	ratio	pollen			Ratio to relative shifts between the subalpine and the lower altitudinal steppe vegetation belts. A proxy for the elevation of treeline and the density of Picea subalpine forest	Picea/Artemisia	unitless	abs	T	air@surface		annual	annual	positive	-50	110215	230	0.6639	0.45	TRUE	CR	This pollen ratio time series was generated for the wNAm database.	http://lipdverse.org/wNAm/0_15_0/HermitLake.Anderson.2018.html
HiddenLakeCA.Potito.2006	Hidden Lake CA	North America>United States Of America>California	38.2613	-119.537	2379	10.1016/j.yqres.2006.05.005		www.ncdc.noaa.gov/paleo/study/27330		LakeSediment	chironomid	assemblage	chironomid	WAPLS	7	44-lake surface water temperature training set from Sierra Nevada (Porinchu et al. 2002)	temperature	degC	abs	T	lake@surface		summer	summerOnly	positive	15.6	15314.1	244.595	0.584093	1.4	TRUE	MTO, YLA, APP, DFP		http://lipdverse.org/wNAm/0_15_0/HiddenLakeCA.Potito.2006.html
HiddenLakeCO.Shuman.2009	Hidden Lake CO	North America>United States Of America>Colorado	40.505	-106.607	2708	10.1016/j.quascirev.2009.03.003		www.ncdc.noaa.gov/paleo/study/23077		LakeSediment	stratigraphy	core transect	biophysical			Elevation below modern	lakeLevel	cm	anom	P-E	lakeLevel@surface		annual	annual	negative	50	7900	50	0.89172	0.99	TRUE	CR		http://lipdverse.org/wNAm/0_15_0/HiddenLakeCO.Shuman.2009.html
HLY0501.deVernal.2013	HLY0501	Arctic Ocean	72.6947	-157.52	-415	10.1016/j.quascirev.2013.07.006	10.5194/cp-10-1605-2014	www.ncdc.noaa.gov/paleo/study/15444		MarineSediment	dinocyst	assemblage	other microfossil				temperature	degC	abs	T	sea@surface		summer	summer+	positive	225.35	8209.4	90.5	0.751498	1.7	TRUE	SLJ, SHA		http://lipdverse.org/wNAm/0_15_0/HLY0501.deVernal.2013.html
HLY0501.deVernal.2013	HLY0501	Arctic Ocean	72.6947	-157.52	-415	10.1016/j.quascirev.2013.07.006	10.5194/cp-10-1605-2014	www.ncdc.noaa.gov/paleo/study/15444		MarineSediment	dinocyst	assemblage	other microfossil				Sea_Ice_months	months/year	abs	ICE	sea@surface		annual	annual	positive	225.35	8209.4	90.5	0.751498	0.84	TRUE	SHA		http://lipdverse.org/wNAm/0_15_0/HLY0501.deVernal.2013.html
HLY0501.deVernal.2013	HLY0501	Arctic Ocean	72.6947	-157.52	-415	10.1016/j.quascirev.2013.07.006	10.5194/cp-10-1605-2014	www.ncdc.noaa.gov/paleo/study/15444		MarineSediment	dinocyst	assemblage	other microfossil				temperature	degC	abs	T	sea@surface		summer + winter	annual	positive	225.35	8209.4	90.5	0.751498	1.2	TRUE	SLJ, SHA		http://lipdverse.org/wNAm/0_15_0/HLY0501.deVernal.2013.html
Honeymoon.Cwynar.1991	Honeymoon	North America>Canada>Yukon Territory	64.63	-138.4	1160	10.2307/1938915	10.5194/cp-10-1605-2014	10.21233/N33Q7V	1074	LakeSediment	pollen	assemblage	pollen	MAT			temperature	degC	anom	T	air@surface		coldest	winter+	positive	17	10795	116.5	1.85563	3	TRUE	TB		http://lipdverse.org/wNAm/0_15_0/Honeymoon.Cwynar.1991.html
Honeymoon.Cwynar.1991	Honeymoon	North America>Canada>Yukon Territory	64.63	-138.4	1160	10.2307/1938915	10.5194/cp-10-1605-2014	10.21233/N33Q7V	1074	LakeSediment	pollen	assemblage	pollen				precipitation	mm	anom	P	amount@surface		annual	annual	positive	17	10795	116.5	1.85563	368	TRUE	CR		http://lipdverse.org/wNAm/0_15_0/Honeymoon.Cwynar.1991.html
Honeymoon.Cwynar.1991	Honeymoon	North America>Canada>Yukon Territory	64.63	-138.4	1160	10.2307/1938915	10.5194/cp-10-1605-2014	10.21233/N33Q7V	1074	LakeSediment	pollen	assemblage	pollen				temperature	degC	anom	T	air@surface		summer	summer+	positive	17	10795	116.5	1.85563	2	TRUE	DSK		http://lipdverse.org/wNAm/0_15_0/Honeymoon.Cwynar.1991.html
Honeymoon.Cwynar.1991	Honeymoon	North America>Canada>Yukon Territory	64.63	-138.4	1160	10.2307/1938915	10.5194/cp-10-1605-2014	10.21233/N33Q7V	1074	LakeSediment	pollen	assemblage	pollen	MAT			temperatureComposite	degC	anom	T	air@surface		coldest month + summer	annual	positive	17	10795	116.5	1.85563	2.1	TRUE	TB	this timeseries was composited programmatically, with the assumption that all values are measured at equivalent levels	http://lipdverse.org/wNAm/0_15_0/Honeymoon.Cwynar.1991.html
Hudson.Clegg.2011	Hudson-AK	North America>United States Of America>Alaska	61.9	-145.667	657	10.1073/pnas.1110913108	10.5194/cp-10-1605-2014	www.ncdc.noaa.gov/paleo/study/15444		LakeSediment	chironomid	assemblage	chironomid	WAPLS	7	northwest North American training set (Barley 2006)	temperature	degC	abs	T	air@surface		summer	summerOnly	positive	-27.942	9574	96.828	1.87462	1.4	TRUE	MTO, YLA		http://lipdverse.org/wNAm/0_15_0/Hudson.Clegg.2011.html
HuntersLake.Anderson.2008	Hunters Lake	North America>United States Of America>Colorado	37.611	-106.844	3476	10.1071/WF07028		wNAm	20304	LakeSediment	pollen	ratio	pollen			Indication for the relative position of upper treeline	Picea/Pinus	unitless	abs	T	air@surface		annual	annual	positive	-46	13940	357	0.415076	0.13	TRUE	CR	This pollen ratio time series was generated for the wNAm database.	http://lipdverse.org/wNAm/0_15_0/HuntersLake.Anderson.2008.html
HuntersLake.Anderson.2008	Hunters Lake	North America>United States Of America>Colorado	37.611	-106.844	3476	10.1071/WF07028		wNAm	20304	LakeSediment	pollen	ratio	pollen			Indication for the relative position of lower treeline	Picea/Artemisia	unitless	abs	T	air@surface		annual	annual	positive	-46	13940	357	0.415076	0.73	TRUE	CR	This pollen ratio time series was generated for the wNAm database.	http://lipdverse.org/wNAm/0_15_0/HuntersLake.Anderson.2008.html
HuntersLake.Anderson.2008	Hunters Lake	North America>United States Of America>Colorado	37.611	-106.844	3476	10.1071/WF07028		wNAm	20304	LakeSediment	pollen	ratio	pollen			Ratio to relative shifts between the subalpine and the lower altitudinal steppe vegetation belts. A proxy for the elevation of treeline.	Pinus/Artemisia	unitless	abs	T	air@surface		annual	annual	positive	-46	13940	357	0.415076	1.04	TRUE	CR	This pollen ratio time series was generated for the wNAm database.	http://lipdverse.org/wNAm/0_15_0/HuntersLake.Anderson.2008.html
Jellybean.Anderson.2005	Jellybean Lake	North America>Canada>Yukon Territory	60.35	-134.8	730	10.1016/j.yqres.2005.03.005		www.ncdc.noaa.gov/paleo/study/5445		LakeSediment	d18O	calcite in bulk sediment	isotope				d18O	permil	abs	MODE	aleutianLow	aleutian low	winter	winterOnly	negative	-52	7556	22	1.05152	0.36	TRUE	CR		http://lipdverse.org/wNAm/0_15_0/Jellybean.Anderson.2005.html
Jenny.Larson.2016	Jenny Lake	North America>United States Of America>Wyoming	43.7505	-110.734	2070	10.1016/j.quascirev.2016.02.024		www.ncdc.noaa.gov/paleo/study/20128		LakeSediment	TIC	bulk sediment	biophysical			"trend in clastic sediment parameters at Jenny Lake reflects continued glacier recession"	clastic_flux	g/cm2/kyr	abs	ELA	glacierExtent		annual	annual	positive	69	14552	109	1.76012	0.01	TRUE	SHA	Lat/lon updated to four decimals with Google Earth	http://lipdverse.org/wNAm/0_15_0/Jenny.Larson.2016.html
Jones.Shapley.2009	Jones Lake	North America>United States Of America>Montana	47.05	-113.14	1248	10.1177/0959683609104029		www.ncdc.noaa.gov/paleo/study/23076		LakeSediment	d18O	calcite in bulk sediment	isotope				d18O	permil	abs	P-E	lake@surface		annual	annual	negative	-13.3	12693	15	0.582688	0.83	TRUE	CR	Has 3075 - year chronology gap.	http://lipdverse.org/wNAm/0_15_0/Jones.Shapley.2009.html
Keele.Szeicz.1995	Keele	North America>Canada>Northwest Territories	64.17	-127.62	1150	10.1016/0031-0182(95)00070-3	10.1038/nature25464	www.ncdc.noaa.gov/paleo/study/27330	10.21233/N3106M	LakeSediment	pollen	assemblage	pollen	MAT			temperature	degC	abs	T	air@surface		warmest month	summer+	positive	0	10888	275.4	0.551065	2	TRUE	TB, DSK	gap of 3.2 ka; 6 ages okay	http://lipdverse.org/wNAm/0_15_0/Keele.Szeicz.1995.html
Keele.Szeicz.1995	Keele	North America>Canada>Northwest Territories	64.17	-127.62	1150	10.1016/0031-0182(95)00070-3	10.1038/nature25464	www.ncdc.noaa.gov/paleo/study/27330	10.21233/N3106M	LakeSediment	pollen	assemblage	pollen	MAT			temperature	degC	abs	T	air@surface		coldest month	winter+	positive	0	10888	275.4	0.551065	3	TRUE	TB, DSK	gap of 3.2 ka; 6 ages okay	http://lipdverse.org/wNAm/0_15_0/Keele.Szeicz.1995.html
Keele.Szeicz.1995	Keele	North America>Canada>Northwest Territories	64.17	-127.62	1150	10.1016/0031-0182(95)00070-3	10.1038/nature25464	www.ncdc.noaa.gov/paleo/study/27330	10.21233/N3106M	LakeSediment	pollen	assemblage	pollen	MAT			temperature	degC	abs	T	air@surface		annual	annual	positive	0	10888	275.4	0.551065	2.1	TRUE	TB, DSK	gap of 3.2 ka; 6 ages okay	http://lipdverse.org/wNAm/0_15_0/Keele.Szeicz.1995.html
Keele.Szeicz.1995	Keele	North America>Canada>Northwest Territories	64.17	-127.62	1150	10.1016/0031-0182(95)00070-3	10.1038/nature25464	www.ncdc.noaa.gov/paleo/study/27330	10.21233/N3106M	LakeSediment	pollen	assemblage	pollen	MAT			precipitation	mm	abs	P	amount@surface		annual	annual	positive	0	10888	275.4	0.551065	368	TRUE	JM	Pecipitation reconstruction generated with, and using methods described in Marsicek 2018. Reconstruction published as part of the wNAm database.	http://lipdverse.org/wNAm/0_15_0/Keele.Szeicz.1995.html
KeystoneIronbog.Fall.1985	Keystone Iron Bog	North America>United States Of America>Colorado	38.87	-107.03	2920	Fall, P.L. 1985. Holocene dynamics of the subalpine forest in central colorado. American Association of Stratigraphic Palynologists Contribution Series No. 16:31-46.	10.1038/nature25464	www.ncdc.noaa.gov/paleo/study/27330	10.21233/N3704Q	LakeSediment	pollen	assemblage	pollen	MAT			temperature	degC	abs	T	air@surface		warmest month	summer+	positive	-5	9168	295	0.545078	2	TRUE	TB, DSK	age gap of 3.2 ka, but five ages all on veg macrofossils	http://lipdverse.org/wNAm/0_15_0/KeystoneIronbog.Fall.1985.html
KeystoneIronbog.Fall.1985	Keystone Iron Bog	North America>United States Of America>Colorado	38.87	-107.03	2920	Fall, P.L. 1985. Holocene dynamics of the subalpine forest in central colorado. American Association of Stratigraphic Palynologists Contribution Series No. 16:31-46.	10.1038/nature25464	www.ncdc.noaa.gov/paleo/study/27330	10.21233/N3704Q	LakeSediment	pollen	assemblage	pollen	MAT			temperature	degC	abs	T	air@surface		coldest month	winter+	positive	-5	9168	295	0.545078	3	TRUE	TB, DSK	age gap of 3.2 ka, but five ages all on veg macrofossils	http://lipdverse.org/wNAm/0_15_0/KeystoneIronbog.Fall.1985.html
KeystoneIronbog.Fall.1985	Keystone Iron Bog	North America>United States Of America>Colorado	38.87	-107.03	2920	Fall, P.L. 1985. Holocene dynamics of the subalpine forest in central colorado. American Association of Stratigraphic Palynologists Contribution Series No. 16:31-46.	10.1038/nature25464	www.ncdc.noaa.gov/paleo/study/27330	10.21233/N3704Q	LakeSediment	pollen	assemblage	pollen	MAT			temperature	degC	abs	T	air@surface		annual	annual	positive	-5	9168	295	0.545078	2.1	TRUE	TB, DSK	age gap of 3.2 ka, but five ages all on veg macrofossils	http://lipdverse.org/wNAm/0_15_0/KeystoneIronbog.Fall.1985.html
KirmanLake.MacDonald.2016	Kirman Lake	North America>United States Of America>California	38.34	-119.5	2174	10.1038/srep33325		dataverse.harvard.edu/dataverse/UCLAGMacDonald		LakeSediment	diatom	assemblage	other microfossil			diatom inferred lake depth	lakeLevel	m	abs	P-E	lakeLevel@surface		annual	annual	positive	-33	8892	27	0.896359	175.9	TRUE	CR		http://lipdverse.org/wNAm/0_15_0/KirmanLake.MacDonald.2016.html
KirmanLake.MacDonald.2016	Kirman Lake	North America>United States Of America>California	38.34	-119.5	2174	10.1038/srep33325		dataverse.harvard.edu/dataverse/UCLAGMacDonald		LakeSediment	diatom	assemblage	other microfossil				salinity	mg/L	abs	P-E	lakeSalinity		annual	annual	negative	-33	8892	27	0.896359	1.17	TRUE	CR		http://lipdverse.org/wNAm/0_15_0/KirmanLake.MacDonald.2016.html
KiteLake.JimenezMoreno.2012	Kite Lake	North America>United States Of America>Colorado	39.3295	-106.13	3668	10.1177/0959683612450199		wNAm		LakeSediment	pollen	single species	pollen			Pinus edulis: a good approximate of changes in winter precipitation.	Pinyon	percent	abs	P-E	@surface		winter	winterOnly	positive	0	15514	48	0.916667	1.52	TRUE	CR		http://lipdverse.org/wNAm/0_15_0/KiteLake.JimenezMoreno.2012.html
KiteLake.JimenezMoreno.2012	Kite Lake	North America>United States Of America>Colorado	39.3295	-106.13	3668	10.1177/0959683612450199		wNAm		LakeSediment	pollen	ratio	pollen			Indication for the relative position of upper treeline	Picea/Pinus	unitless	abs	T	air@surface		annual	annual	negative	0	15514	48	0.916667	1.38	TRUE	CR	This pollen ratio time series was generated for the wNAm database.	http://lipdverse.org/wNAm/0_15_0/KiteLake.JimenezMoreno.2012.html
KiteLake.JimenezMoreno.2012	Kite Lake	North America>United States Of America>Colorado	39.3295	-106.13	3668	10.1177/0959683612450199		wNAm		LakeSediment	pollen	ratio	pollen			Ratio to relative shifts between the subalpine and the lower altitudinal steppe vegetation belts. A proxy for the elevation of treeline	Picea/Artemisia	unitless	abs	T	air@surface		annual	annual	positive	0	15514	48	0.916667	2.14	TRUE	CR	This pollen ratio time series was generated for the wNAm database.	http://lipdverse.org/wNAm/0_15_0/KiteLake.JimenezMoreno.2012.html
KiteLake.JimenezMoreno.2012	Kite Lake	North America>United States Of America>Colorado	39.3295	-106.13	3668	10.1177/0959683612450199		wNAm		LakeSediment	pollen	ratio	pollen			Indication for the relative position of lower treeline	Pinus/Artemisia	unitless	abs	T	air@surface		annual	annual	positive	0	15514	48	0.916667	16.32	TRUE	CR	This pollen ratio time series was generated for the wNAm database.	http://lipdverse.org/wNAm/0_15_0/KiteLake.JimenezMoreno.2012.html
KNR159_JPC26.Antonarakou.2015	KNR159_JPC26	Atlantic Ocean>North Atlantic Ocean>Gulf Of Mexico	26.374	-92.027	-1995	10.1016/j.gca.2015.08.003	10.2110/palo.2012.p12-060r	www.ncdc.noaa.gov/paleo/study/27330		MarineSediment	Mg/Ca	ruber_lato	Mg/Ca	Baymag (baymag_predict.m) github.com/jesstierney/BAYMAG Parameters: omega=1.6163, salinity=35.1075, pH=8.0316, clean=0, species=ruber, pstd=10, varargin=0			temperature	degC	abs	T	sea@surface		4 5 6 7 8 9 10 11 12	annual	positive	510	21130	350	0.435161	1.9	TRUE	JET, DSK	youngest age = 5.7 ka; youngest sample = 0.5 ka; 5 ages within Holocene; retain to exapnd coverage south of 30 N	http://lipdverse.org/wNAm/0_15_0/KNR159_JPC26.Antonarakou.2015.html
KNR159_JPC26.Antonarakou.2015	KNR159_JPC26	Atlantic Ocean>North Atlantic Ocean>Gulf Of Mexico	26.374	-92.027	-1995	10.1016/j.gca.2015.08.003	10.2110/palo.2012.p12-060r	www.ncdc.noaa.gov/paleo/study/27330		MarineSediment	Mg/Ca	ruber_stricto	Mg/Ca	Baymag (baymag_predict.m) github.com/jesstierney/BAYMAG Parameters: omega=1.6163, salinity=35.1075, pH=8.0316, clean=0, species=ruber, pstd=10, varargin=0			temperature	degC	abs	T	sea@surface		4 5 6 7 8 9 10 11 12	annual	positive	510	21130	350	0.435161	1.9	TRUE	JET, DSK	youngest age = 5.7 ka; youngest sample = 0.5 ka; 5 ages within Holocene; retain to exapnd coverage south of 30 N	http://lipdverse.org/wNAm/0_15_0/KNR159_JPC26.Antonarakou.2015.html
KNR159_JPC26.Antonarakou.2015	KNR159_JPC26	Atlantic Ocean>North Atlantic Ocean>Gulf Of Mexico	26.374	-92.027	-1995	10.1016/j.gca.2015.08.003	10.2110/palo.2012.p12-060r	www.ncdc.noaa.gov/paleo/study/27330		MarineSediment	d18O	ruber_lato	isotope	Bayfoxm (byfox_predict.m) 10.1029/2019PA003576 Parameters: prior_mean=26.6186, prior_std=10, species=ruber, bayes=unspecified; For d18osw, values are specified to change through time, and are calculated using the getvardelo.m program from Jess Tierney, based on the modern value of d18osw (0.73797) for the archive location			temperature	degC	abs	T	sea@surface		annual	annual	positive	510	21130	350	0.435161	2.1	TRUE	JET, DSK	youngest age = 5.7 ka; youngest sample = 0.5 ka; 5 ages within Holocene; retain to exapnd coverage south of 30 N	http://lipdverse.org/wNAm/0_15_0/KNR159_JPC26.Antonarakou.2015.html
KNR159_JPC26.Antonarakou.2015	KNR159_JPC26	Atlantic Ocean>North Atlantic Ocean>Gulf Of Mexico	26.374	-92.027	-1995	10.1016/j.gca.2015.08.003	10.2110/palo.2012.p12-060r	www.ncdc.noaa.gov/paleo/study/27330		MarineSediment	d18O	ruber_stricto	isotope	Bayfoxm (byfox_predict.m) 10.1029/2019PA003576 Parameters: prior_mean=26.6186, prior_std=10, species=ruber, bayes=unspecified; For d18osw, values are specified to change through time, and are calculated using the getvardelo.m program from Jess Tierney, based on the modern value of d18osw (0.73797) for the archive location			temperature	degC	abs	T	sea@surface		annual	annual	positive	510	21130	350	0.435161	2.1	TRUE	JET, DSK	youngest age = 5.7 ka; youngest sample = 0.5 ka; 5 ages within Holocene; retain to exapnd coverage south of 30 N	http://lipdverse.org/wNAm/0_15_0/KNR159_JPC26.Antonarakou.2015.html
KoksilahRiverDischarge.Brown.2015	Koksilah River	North America>Canada>British Columbia	48.755	-123.682	14	10.1016/j.yqres.2015.03.003		wNAm		LakeSediment	pollen	assemblage	pollen	DWHI-MAP and gauging station		MAP updated. Streamflow based on DWHI-MAP and Bartlein et al. 1998 and He 2011. Multiple lakes pollen-precipitation transfer function and basin hydrology modeling.	discharge	mm	abs	P	riverFlow@surface		annual	annual	positive	0	10000	250		163	TRUE	KJB, GS, SHA	No chrondata available because from multiple lakes	http://lipdverse.org/wNAm/0_15_0/KoksilahRiverDischarge.Brown.2015.html
KoksilahRiverDischarge.Brown.2015	Koksilah River	North America>Canada>British Columbia	48.755	-123.682	14	10.1016/j.yqres.2015.03.003		wNAm		LakeSediment	pollen	assemblage	pollen	DWHI-MAP and gauging station		MAP updated. Streamflow based on DWHI-MAP and Bartlein et al. 1998 and He 2011. Multiple lakes pollen-precipitation transfer function and basin hydrology modeling.	discharge	mm	abs	P	riverFlow@surface		AMJJAS	summer+	positive	0	10000	250		163	TRUE	KJB, GS, SHA	No chrondata available because from multiple lakes	http://lipdverse.org/wNAm/0_15_0/KoksilahRiverDischarge.Brown.2015.html
KoksilahRiverDischarge.Brown.2015	Koksilah River	North America>Canada>British Columbia	48.755	-123.682	14	10.1016/j.yqres.2015.03.003		wNAm		LakeSediment	pollen	assemblage	pollen	DWHI-MAP and gauging station		MAP updated. Streamflow based on DWHI-MAP and Bartlein et al. 1998 and He 2011. Multiple lakes pollen-precipitation transfer function and basin hydrology modeling.	discharge	mm	abs	P	riverFlow@surface		10 11 12 1 2 3	winter+	positive	0	10000	250		163	TRUE	KJB, GS, SHA	No chrondata available because from multiple lakes	http://lipdverse.org/wNAm/0_15_0/KoksilahRiverDischarge.Brown.2015.html
Kurupa.Boldt.2015	Kurupa Lake	North America>United States Of America>Alaska	68.35	-154.61	920	10.1177/0959683614565929		www.ncdc.noaa.gov/paleo/study/18995		LakeSediment	chlorophyll	RABD660:670	biophysical				temperature	degC	anom	T	air@surface		6 7 8 9	summerOnly	positive	-52.909	5593.69	2.829	1.06259	2.1	TRUE	DSK		http://lipdverse.org/wNAm/0_15_0/Kurupa.Boldt.2015.html
Kusawa.Chakraborty.2010	Kusawa	North America>Canada>Yukon Territory	60.275	-136.182	671	10.1016/j.yqres.2010.04.011	10.5194/cp-10-1605-2014	www.ncdc.noaa.gov/paleo/study/15444		LakeSediment	BSi	bulk sediment	biophysical				BSi	percent	abs	T	air@surface		summer	summerOnly	positive	76.54	12298.4	86.68	0.419341	2.84	TRUE	DSK	from author: "The increase in production ... during the HTM provides further evidence of the positive relationship between warmer temperatures and primary production"	http://lipdverse.org/wNAm/0_15_0/Kusawa.Chakraborty.2010.html
LacMeleze.MacDonald.1987	Lac Meleze	North America>Canada>Northwest Territories	65.22	-126.12	650	10.1016/0033-5894(87)90063-9	10.1038/nature25464	www.ncdc.noaa.gov/paleo/study/27330	10.21233/N34D25	LakeSediment	pollen	assemblage	pollen	MAT			temperature	degC	abs	T	air@surface		warmest month	summer+	positive	-32	10590	207	0.564865	2	TRUE	TB, DSK	fails age control, largest gap is 3270 yrs; six well-spaced ages within Holocene	http://lipdverse.org/wNAm/0_15_0/LacMeleze.MacDonald.1987.html
LacMeleze.MacDonald.1987	Lac Meleze	North America>Canada>Northwest Territories	65.22	-126.12	650	10.1016/0033-5894(87)90063-9	10.1038/nature25464	www.ncdc.noaa.gov/paleo/study/27330	10.21233/N34D25	LakeSediment	pollen	assemblage	pollen	MAT			temperature	degC	abs	T	air@surface		coldest month	winter+	positive	-32	10590	207	0.564865	3	TRUE	TB, DSK	fails age control, largest gap is 3270 yrs; six well-spaced ages within Holocene	http://lipdverse.org/wNAm/0_15_0/LacMeleze.MacDonald.1987.html
LacMeleze.MacDonald.1987	Lac Meleze	North America>Canada>Northwest Territories	65.22	-126.12	650	10.1016/0033-5894(87)90063-9	10.1038/nature25464	www.ncdc.noaa.gov/paleo/study/27330	10.21233/N34D25	LakeSediment	pollen	assemblage	pollen	MAT			temperature	degC	abs	T	air@surface		annual	annual	positive	-32	10590	207	0.564865	2.1	TRUE	TB, DSK	fails age control, largest gap is 3270 yrs; six well-spaced ages within Holocene	http://lipdverse.org/wNAm/0_15_0/LacMeleze.MacDonald.1987.html
LacMeleze.MacDonald.1987	Lac Meleze	North America>Canada>Northwest Territories	65.22	-126.12	650	10.1016/0033-5894(87)90063-9	10.1038/nature25464	www.ncdc.noaa.gov/paleo/study/27330	10.21233/N34D25	LakeSediment	pollen	assemblage	pollen	MAT			precipitation	mm	abs	P	amount@surface		annual	annual	positive	-32	10590	207	0.564865	368	TRUE	JM	Pecipitation reconstruction generated with, and using methods described in Marsicek 2018. Reconstruction published as part of the wNAm database.	http://lipdverse.org/wNAm/0_15_0/LacMeleze.MacDonald.1987.html
LagoPuertoArturo.Wahl.2014	Lago Puerto Arturo	North America>Central America>Guatemala	17.533	-90.183	179	10.1016/j.quascirev.2014.08.004	10.1016/j.yqres.2005.10.004	wNAm		LakeSediment	d18O	calcite in bulk sediment	isotope			P/E Lake	d18O	permil	anom	P-E	lake@surface		annual	annual	negative	443	8710	31	1.33059	1.28	TRUE	DBW	Depths for 14C ages need to be adjusted downcore 13 cm (due to surface core rectification between 2006 pub and 2014 pub); ages reported in 2014 paper reflect this downward shift in depth. This adjustment does not change the relationship between ages and data.	http://lipdverse.org/wNAm/0_15_0/LagoPuertoArturo.Wahl.2014.html
LagunaDeAljojuca.Bhattacharya.2015	Laguna De Aljojuca	North America>Mexico	19.0915	-97.5338	2376	10.1073/pnas.1405653112		www.ncdc.noaa.gov/paleo/study/17735		LakeSediment	d18O	calcite in bulk sediment	isotope			P/E Lake	d18O	permil	abs	P-E	lake@surface		annual	annual	negative	-49.2	4139.7	13.1	3.34217	2.53	TRUE	SHA		http://lipdverse.org/wNAm/0_15_0/LagunaDeAljojuca.Bhattacharya.2015.html
LagunaDeJuanacatlan.Jones.2015	Laguna de Juanacatlan	North America>Mexico	20.6293	-104.736	2000	10.1016/j.quascirev.2015.07.004	10.1177/0959683610371994	wNAm		LakeSediment	Ti	uchannel XRF	biophysical			Ti_norm	Ti	unitless	abs	P	runoff@surface	monsoon	annual	annual	positive	50	5823	1	4.15728	0.01	TRUE	SEM		http://lipdverse.org/wNAm/0_15_0/LagunaDeJuanacatlan.Jones.2015.html
LakeoftheWoods.Palmer.2002	Lake of the Woods	North America>Canada>British Columbia	49.05	-120.183	2050	10.1023/A:1021644122727	10.1890/12-1742.1	www.ncdc.noaa.gov/paleo/study/27330		LakeSediment	chironomid	assemblage	chironomid	WAPLS	7	51 lakes from British Columbia (Palmer et al. 2002)	temperature	degC	abs	T	air@surface		summer	summerOnly	positive	-122.251	11788.6	113.863	0.587701	1.4	TRUE	MTO, IRW, CR	Note: this is a different site than the lake level record from the Lake of the Woods, Wyoming. Largest age control gap is 3390 uncal yrs, accepted with relaxing criteria: important record from the region; untenable minimum age	http://lipdverse.org/wNAm/0_15_0/LakeoftheWoods.Palmer.2002.html
LakeOfTheWoods.Pribyl.2014	Lake of the Woods	North America>United States Of America>Wyoming	43.4822	-109.893	2820	10.1016/j.yqres.2014.01.012	10.1029/2009GL042196	wNAm		LakeSediment	stratigraphy	core transect	biophysical			Elevation below modern	lakeLevel	cm	abs	P-E	lakeLevel@surface		annual	annual	negative	50	17900	50	1.75732	0.88	TRUE	CR		http://lipdverse.org/wNAm/0_15_0/LakeOfTheWoods.Pribyl.2014.html
LakeStowell.Lemmen.2018	Stowell Lake	North America>Canada>British Columbia	48.7833	-123.445	70	10.1007/s10933-017-9998-3		www.ncdc.noaa.gov/paleo/study/27330		LakeSediment	chironomid	assemblage	chironomid	WAPLS	7	Fortin et al. 2015 training set (FOR15), Barley et al. 2006	temperature	degC	abs	T	air@surface		summer	summerOnly	positive	-57	14183	107.5	0.497636	1.4	TRUE	MTO, YLA		http://lipdverse.org/wNAm/0_15_0/LakeStowell.Lemmen.2018.html
LehmanCaves.Steponaitis.2015	Lehman Caves	North America>United States Of America>Nevada	39.0006	-114.22	2130	10.1016/j.quascirev.2015.04.011		www.ncdc.noaa.gov/paleo/study/19038		Speleothem	d13C	calcite	isotope			infiltration: "We therefore interpret Mg/Ca and d13C as reflecting infiltration rates, with higher values corresponding to drier periods."	d13C	permil	abs	P-E	infiltration		winter	winterOnly	negative	3836	11446	52	1.83968	1.15	TRUE	CR		http://lipdverse.org/wNAm/0_15_0/LehmanCaves.Steponaitis.2015.html
LehmanCaves.Steponaitis.2015	Lehman Caves	North America>United States Of America>Nevada	39.0006	-114.22	2130	10.1016/j.quascirev.2015.04.011		www.ncdc.noaa.gov/paleo/study/19038		Speleothem	Mg/Ca	calcite	Mg/Ca			infiltration: "We therefore interpret Mg/Ca and d13C as reflecting infiltration rates, with higher values corresponding to drier periods."	Mg/Ca	mmol/mol	abs	P-E	infiltration		winter	winterOnly	negative	3977	11449	97	1.87366	0	TRUE	CR		http://lipdverse.org/wNAm/0_15_0/LehmanCaves.Steponaitis.2015.html
Leviathan.Lachniet.2014	Leviathan	North America>United States Of America>Nevada	37.89	-115.58	2400	10.1038/ncomms4805		www.ncdc.noaa.gov/paleo/study/16517		Speleothem	d13C	calcite	isotope			soil moisture amount	d13C	permil	abs	P-E	soilMoisture		annual	annual	negative	-60	13308.2	5.474	1.24378	1.27	TRUE	CR		http://lipdverse.org/wNAm/0_15_0/Leviathan.Lachniet.2014.html
Leviathan.Lachniet.2014	Leviathan	North America>United States Of America>Nevada	37.89	-115.58	2400	10.1038/ncomms4805		www.ncdc.noaa.gov/paleo/study/16517		Speleothem	d18O	calcite	isotope				d18O	permil	abs	T	air@surface		annual	annual	positive	-60	13308.2	5.474	1.24378	0.6	TRUE	KR		http://lipdverse.org/wNAm/0_15_0/Leviathan.Lachniet.2014.html
Lily.Cwynar.1990	Lily	North America>United States Of America>Alaska	59.2026	-135.395	230	10.1139/b90-139	10.5194/cp-10-1605-2014	www.ncdc.noaa.gov/paleo/study/15444	10.21233/N31358	LakeSediment	pollen	assemblage	pollen	MAT		Temperatures are an average of the best 3 estimates and the anomalies are relative to 1961-1990 baseline period.	temperature	degC	anom	T	air@surface		coldest	winter+	positive	54	12740	159	1.17194	3	TRUE	TB, SHA	Temperatures are an average of the best 3 estimates and the anomalies are relative to 1961-1990 baseline period. Lat/lon updated to four decimals with Google Earth	http://lipdverse.org/wNAm/0_15_0/Lily.Cwynar.1990.html
Lily.Cwynar.1990	Lily	North America>United States Of America>Alaska	59.2026	-135.395	230	10.1139/b90-139	10.5194/cp-10-1605-2014	www.ncdc.noaa.gov/paleo/study/15444	10.21233/N31358	LakeSediment	pollen	assemblage	pollen	MAT			precipitation	mm	anom	P	amount@surface		annual	annual	positive	54	12740	159	1.17194	368	TRUE	SHA	Lat/lon updated to four decimals with Google Earth	http://lipdverse.org/wNAm/0_15_0/Lily.Cwynar.1990.html
Lily.Cwynar.1990	Lily	North America>United States Of America>Alaska	59.2026	-135.395	230	10.1139/b90-139	10.5194/cp-10-1605-2014	www.ncdc.noaa.gov/paleo/study/15444	10.21233/N31358	LakeSediment	pollen	assemblage	pollen	MAT			temperature	degC	anom	T	air@surface		warmest month	summer+	positive	54	12740	159	1.17194	2	TRUE	DSK, SHA	Lat/lon updated to four decimals with Google Earth	http://lipdverse.org/wNAm/0_15_0/Lily.Cwynar.1990.html
Lily.Cwynar.1990	Lily	North America>United States Of America>Alaska	59.2026	-135.395	230	10.1139/b90-139	10.5194/cp-10-1605-2014	www.ncdc.noaa.gov/paleo/study/15444	10.21233/N31358	LakeSediment	pollen	assemblage	pollen	MAT		Temperatures are an average of the best 3 estimates and the anomalies are relative to 1961-1990 baseline period.	temperatureComposite	degC	anom	T	air@surface		coldest + warmest month	annual	positive	54	12740	159	1.17194	2.1	TRUE	TB, SHA	remperatures are an average of the best 3 estimates and the anomalies are relative to 1961-1990 baseline period. Lat/lon updated to four decimals with Google Earth	http://lipdverse.org/wNAm/0_15_0/Lily.Cwynar.1990.html
LimeLake.Steinman.2016	Lime Lake	North America>United States Of America>Washington	48.874	-117.338	781	10.1016/j.quascirev.2016.04.012		www.ncdc.noaa.gov/paleo/study/21250		LakeSediment	d18O	calcite in bulk sediment	isotope			P/E lake	d18O	permil	abs	P-E	lake@surface		winter	winterOnly	negative	-54.8	7765.2	11.9	1.79028	0.33	TRUE	CR		http://lipdverse.org/wNAm/0_15_0/LimeLake.Steinman.2016.html
LimeLake.Steinman.2016	Lime Lake	North America>United States Of America>Washington	48.874	-117.338	781	10.1016/j.quascirev.2016.04.012		www.ncdc.noaa.gov/paleo/study/21250		LakeSediment	d13C	organic carbon in bulk sediment	isotope			lake level	d13C	permil	abs	P-E	lakeLevel@surface		winter	winterOnly	negative	-54.8	7765.2	11.9	1.79028	1	TRUE	CR		http://lipdverse.org/wNAm/0_15_0/LimeLake.Steinman.2016.html
Little.Whitlock.1995	Little	North America>United States Of America>Oregon	44.17	-123.58	217	10.1130/0016-7606(1995)107<0867:LQVACH>2.3.CO;2	10.1038/nature25464	www.ncdc.noaa.gov/paleo/study/27330	10.21233/N3K446	LakeSediment	pollen	assemblage	pollen	MAT			temperature	degC	abs	T	air@surface		warmest month	summer+	positive	305	10372	279	0.397338	2	TRUE	DSK	age gap of 4.0 ka, but older part of core is well dated	http://lipdverse.org/wNAm/0_15_0/Little.Whitlock.1995.html
Little.Whitlock.1995	Little	North America>United States Of America>Oregon	44.17	-123.58	217	10.1130/0016-7606(1995)107<0867:LQVACH>2.3.CO;2	10.1038/nature25464	www.ncdc.noaa.gov/paleo/study/27330	10.21233/N3K446	LakeSediment	pollen	assemblage	pollen	MAT			temperature	degC	abs	T	air@surface		coldest month	winter+	positive	305	10372	279	0.397338	3	TRUE	DSK	age gap of 4.0 ka, but older part of core is well dated	http://lipdverse.org/wNAm/0_15_0/Little.Whitlock.1995.html
Little.Whitlock.1995	Little	North America>United States Of America>Oregon	44.17	-123.58	217	10.1130/0016-7606(1995)107<0867:LQVACH>2.3.CO;2	10.1038/nature25464	www.ncdc.noaa.gov/paleo/study/27330	10.21233/N3K446	LakeSediment	pollen	assemblage	pollen	MAT			temperature	degC	abs	T	air@surface		annual	annual	positive	305	10372	279	0.397338	2.1	TRUE	DSK	age gap of 4.0 ka, but older part of core is well dated	http://lipdverse.org/wNAm/0_15_0/Little.Whitlock.1995.html
Little.Whitlock.1995	Little	North America>United States Of America>Oregon	44.17	-123.58	217	10.1130/0016-7606(1995)107<0867:LQVACH>2.3.CO;2	10.1038/nature25464	www.ncdc.noaa.gov/paleo/study/27330	10.21233/N3K446	LakeSediment	pollen	assemblage	pollen	MAT			precipitation	mm	abs	P	amount@surface		annual	annual	positive	305	10372	279	0.397338	368	TRUE	JM	Pecipitation reconstruction generated with, and using methods described in Marsicek 2018. Reconstruction published as part of the wNAm database.	http://lipdverse.org/wNAm/0_15_0/Little.Whitlock.1995.html
LittleMolas.Toney.2006	Little Molas Lake	North America>United States Of America>Colorado	37.742	-107.708	3330	10.1191/0959683606hl946rp		wNAm	40543	LakeSediment	pollen	ratio	pollen			Indication for the relative position of upper treeline	Picea/Pinus	unitless	abs	T	air@surface		annual	annual	positive	1434	11251	327	0.611185	0.19	TRUE	CR	This pollen ratio time series was generated for the wNAm database.	http://lipdverse.org/wNAm/0_15_0/LittleMolas.Toney.2006.html
LittleMolas.Toney.2006	Little Molas Lake	North America>United States Of America>Colorado	37.742	-107.708	3330	10.1191/0959683606hl946rp		wNAm	40543	LakeSediment	pollen	ratio	pollen			Ratio to relative shifts between the subalpine and the lower altitudinal steppe vegetation belts. A proxy for the elevation of treeline	Picea/Artemisia	unitless	abs	T	air@surface		annual	annual	positive	1434	11251	327	0.611185	2.06	TRUE	CR	This pollen ratio time series was generated for the wNAm database.	http://lipdverse.org/wNAm/0_15_0/LittleMolas.Toney.2006.html
LittleMolas.Toney.2006	Little Molas Lake	North America>United States Of America>Colorado	37.742	-107.708	3330	10.1191/0959683606hl946rp		wNAm	40543	LakeSediment	pollen	ratio	pollen			Indication for the relative position of lower treeline	Pinus/Artemisia	unitless	abs	T	air@surface		annual	annual	positive	1434	11251	327	0.611185	2.09	TRUE	CR	This pollen ratio time series was generated for the wNAm database.	http://lipdverse.org/wNAm/0_15_0/LittleMolas.Toney.2006.html
LittleWindy.Minckley.2012	Little Windy	North America>United States Of America>Wyoming	41.43	-106.33	2983	10.1890/11-0283.1		www.ncdc.noaa.gov/paleo/study/16096		LakeSediment	stratigraphy	core transect	biophysical			lake level	lakeLevel	m	anom	P-E	lakeLevel@surface		annual	annual	positive	50	12000	50	1.42259	0.81	TRUE	CR		http://lipdverse.org/wNAm/0_15_0/LittleWindy.Minckley.2012.html
Logan.Fisher.2008	Logan	North America>Canada>Yukon Territory	60.58	-140.5	5300	10.1177/0959683608092236		www.ncdc.noaa.gov/paleo/study/15444		GlacierIce	d18O	water	isotope				d18O	permil	abs	MODE	aleutianLow	aleutian low	winter	winterOnly	negative	-40	12950	10		1.59	TRUE	CR		http://lipdverse.org/wNAm/0_15_0/Logan.Fisher.2008.html
LoneFoxLake.MacDonald.1985	Lone Fox Lake	North America>Canada>Alberta	56.72	-119.72	1100	10.1139/x85-168	10.1038/nature25464	www.ncdc.noaa.gov/paleo/study/27330	10.21233/N3H74M	LakeSediment	pollen	assemblage	pollen	MAT			temperature	degC	abs	T	air@surface		warmest month	summer+	positive	-32	10864.1	326.7	0.550656	2	TRUE	TB		http://lipdverse.org/wNAm/0_15_0/LoneFoxLake.MacDonald.1985.html
LoneFoxLake.MacDonald.1985	Lone Fox Lake	North America>Canada>Alberta	56.72	-119.72	1100	10.1139/x85-168	10.1038/nature25464	www.ncdc.noaa.gov/paleo/study/27330	10.21233/N3H74M	LakeSediment	pollen	assemblage	pollen	MAT			temperature	degC	abs	T	air@surface		coldest month	winter+	positive	-32	10864.1	326.7	0.550656	3	TRUE	TB		http://lipdverse.org/wNAm/0_15_0/LoneFoxLake.MacDonald.1985.html
LoneFoxLake.MacDonald.1985	Lone Fox Lake	North America>Canada>Alberta	56.72	-119.72	1100	10.1139/x85-168	10.1038/nature25464	www.ncdc.noaa.gov/paleo/study/27330	10.21233/N3H74M	LakeSediment	pollen	assemblage	pollen	MAT			temperature	degC	abs	T	air@surface		annual	annual	positive	-32	10864.1	326.7	0.550656	2.1	TRUE	TB		http://lipdverse.org/wNAm/0_15_0/LoneFoxLake.MacDonald.1985.html
LoneFoxLake.MacDonald.1985	Lone Fox Lake	North America>Canada>Alberta	56.72	-119.72	1100	10.1139/x85-168	10.1038/nature25464	www.ncdc.noaa.gov/paleo/study/27330	10.21233/N3H74M	LakeSediment	pollen	assemblage	pollen	MAT			precipitation	mm	abs	P	amount@surface		annual	annual	positive	-32	10864.1	326.7	0.550656	368	TRUE	JM	Pecipitation reconstruction generated with, and using methods described in Marsicek 2018. Reconstruction published as part of the wNAm database.	http://lipdverse.org/wNAm/0_15_0/LoneFoxLake.MacDonald.1985.html
Lonespruce.Kaufman.2012	Lonespruce	North America>United States Of America>Alaska	60.007	-159.143	135	10.1007/s10933-012-9607-4	10.5194/cp-10-1605-2014	www.ncdc.noaa.gov/paleo/study/15444		LakeSediment	BSi	bulk sediment	biophysical				BSi	percent	abs	T	air@surface		growing	summerOnly	positive	-4.623	14523.7	17.95	1.58272	6.43	TRUE	DSK		http://lipdverse.org/wNAm/0_15_0/Lonespruce.Kaufman.2012.html
LouisePond.Mathewes.1994	Louise Pond	North America>Canada>British Columbia	52.95	-131.76	650	10.1080/11956860.1994.11682230	10.1038/nature25464	www.ncdc.noaa.gov/paleo/study/27330	10.21233/N37D23	LakeSediment	pollen	assemblage	pollen	MAT			temperature	degC	abs	T	air@surface		warmest month	summer+	positive	61.7	10974	217.1	0.641478	2	TRUE	TB		http://lipdverse.org/wNAm/0_15_0/LouisePond.Mathewes.1994.html
LouisePond.Mathewes.1994	Louise Pond	North America>Canada>British Columbia	52.95	-131.76	650	10.1080/11956860.1994.11682230	10.1038/nature25464	www.ncdc.noaa.gov/paleo/study/27330	10.21233/N37D23	LakeSediment	pollen	assemblage	pollen	MAT			temperature	degC	abs	T	air@surface		coldest month	winter+	positive	61.7	10974	217.1	0.641478	3	TRUE	TB		http://lipdverse.org/wNAm/0_15_0/LouisePond.Mathewes.1994.html
LouisePond.Mathewes.1994	Louise Pond	North America>Canada>British Columbia	52.95	-131.76	650	10.1080/11956860.1994.11682230	10.1038/nature25464	www.ncdc.noaa.gov/paleo/study/27330	10.21233/N37D23	LakeSediment	pollen	assemblage	pollen	MAT			temperature	degC	abs	T	air@surface		annual	annual	positive	61.7	10974	217.1	0.641478	2.1	TRUE	TB		http://lipdverse.org/wNAm/0_15_0/LouisePond.Mathewes.1994.html
LouisePond.Mathewes.1994	Louise Pond	North America>Canada>British Columbia	52.95	-131.76	650	10.1080/11956860.1994.11682230	10.1038/nature25464	www.ncdc.noaa.gov/paleo/study/27330	10.21233/N37D23	LakeSediment	pollen	assemblage	pollen	MAT			precipitation	mm	abs	P	amount@surface		annual	annual	positive	61.7	10974	217.1	0.641478	368	TRUE	JM	Pecipitation reconstruction generated with, and using methods described in Marsicek 2018. Reconstruction published as part of the wNAm database.	http://lipdverse.org/wNAm/0_15_0/LouisePond.Mathewes.1994.html
LowderCreekBog.Anderson.1999	Lowder Creek Bog	North America>United States Of America>Utah	37.6644	-112.775	3077	10.1080/15230430.1999.12003321		wNAm	14549	Peat	pollen	single species	pollen			Pinus edulis: a good approximate of changes in winter precipitation.	Pinyon	unitless	abs	P-E	@surface		winter	winterOnly	positive	-42	15806	383.5	0.249128	1.98	TRUE	CR	chronology gap > 3000 years, but fills important geographic region	http://lipdverse.org/wNAm/0_15_0/LowderCreekBog.Anderson.1999.html
LowderCreekBog.Anderson.1999	Lowder Creek Bog	North America>United States Of America>Utah	37.6644	-112.775	3077	10.1080/15230430.1999.12003321		wNAm	14549	Peat	pollen	ratio	pollen			Indication for the relative position of upper treeline	Picea/Pinus	unitless	abs	T	air@surface		annual	annual	positive	-42	15806	383.5	0.249128	0.38	TRUE	CR	Chronology gap > 3000 years, but fills important geographic region. This pollen ratio time series was generated for the wNAm database.	http://lipdverse.org/wNAm/0_15_0/LowderCreekBog.Anderson.1999.html
LowderCreekBog.Anderson.1999	Lowder Creek Bog	North America>United States Of America>Utah	37.6644	-112.775	3077	10.1080/15230430.1999.12003321		wNAm	14549	Peat	pollen	ratio	pollen			Ratio to relative shifts between the subalpine and the lower altitudinal steppe vegetation belts. A proxy for the elevation of treeline	Picea/Artemisia	unitless	abs	T	air@surface		annual	annual	positive	-42	15806	383.5	0.249128	2.93	TRUE	CR	Chronology gap > 3000 years, but fills important geographic region. This pollen ratio time series was generated for the wNAm database.	http://lipdverse.org/wNAm/0_15_0/LowderCreekBog.Anderson.1999.html
LowderCreekBog.Anderson.1999	Lowder Creek Bog	North America>United States Of America>Utah	37.6644	-112.775	3077	10.1080/15230430.1999.12003321		wNAm	14549	Peat	pollen	ratio	pollen			Indication for the relative position of lower treeline	Pinus/Artemisia	unitless	abs	T	air@surface		annual	annual	positive	-42	15806	383.5	0.249128	3.32	TRUE	CR	Chronology gap > 3000 years, but fills important geographic region. This pollen ratio time series was generated for the wNAm database.	http://lipdverse.org/wNAm/0_15_0/LowderCreekBog.Anderson.1999.html
LowerBearLake.Kirby.2012	Lower Bear Lake	North America>United States Of America>California	34.2	-116.9	2059	10.1016/j.quascirev.2012.05.008		www.ncdc.noaa.gov/paleo/study/13215		LakeSediment	TOC	bulk sediment	biophysical			high LOI interpreted as increased precipitation/run-off (pluvials) and thus higher relative lake level.	LOI	percent	abs	P	runoff@surface		annual	annual	positive	475.51	9355.9	17.26	3.71605	15.31	TRUE	MEK, SHA	Record of pluvials with an annual/winter season interpretation "These conditions include a significantly southward displaced, winter season polar front jet stream, its associated storm tracks, and moisture transport from the tropical North Pacific. Moreover, these conditions must persist on a near annual (winter season) basis for the duration of the lakes existence. To develop and maintain decada…	http://lipdverse.org/wNAm/0_15_0/LowerBearLake.Kirby.2012.html
LowerBearLake.Kirby.2012	Lower Bear Lake	North America>United States Of America>California	34.2	-116.9	2059	10.1016/j.quascirev.2012.05.008		www.ncdc.noaa.gov/paleo/study/13215		LakeSediment	C/N	bulk sediment	biophysical			high CN interpreted as increased precipitation/run-off (pluvials) and thus higher relative lake level.	molarCN	unitless	abs	P	runoff@surface		annual	annual	positive	475.51	9350.85	34.9	3.71817	2.21	TRUE	MEK, SHA		http://lipdverse.org/wNAm/0_15_0/LowerBearLake.Kirby.2012.html
Macal.Akers.2016	Macal Chasm	North America>Central America>Belize	16.883	-89.108	530	10.1016/j.palaeo.2016.07.007		www.ncdc.noaa.gov/paleo/study/20506		Speleothem	d13C	calcite	isotope			"higher levels of vegetation and organic matter as a carbon source will decrease the δ13C value of epikarst waters as the water more closely approximates the naturally lower δ13C values of organic material. Since vegetative productivity is sensitive to water-stress in the karstic Vaca Plateau, drier conditions reduce the amount of biogenic carbon (although potentially with a temporal lag), and th…	d13C	permil	abs	P-E	@surface	monsoon	annual	annual	negative	-42.6	5245	3.6	3.02595	267.3	TRUE	CR		http://lipdverse.org/wNAm/0_15_0/Macal.Akers.2016.html
Macal.Akers.2016	Macal Chasm	North America>Central America>Belize	16.883	-89.108	530	10.1016/j.palaeo.2016.07.007		www.ncdc.noaa.gov/paleo/study/20506		Speleothem	d18O	calcite	isotope			Amount effect "The δ18O variation of rainfall in many tropical locations like the Vaca Plateau is largely controlled by the amount effect, where increased amounts of rainfall are correlated with lower δ18O values"	d18O	permil	abs	P	amount@surface	monsoon	annual	annual	negative	-42.6	5245	3.6	3.02595	6.84	TRUE	CR		http://lipdverse.org/wNAm/0_15_0/Macal.Akers.2016.html
Macal.Akers.2016	Macal Chasm	North America>Central America>Belize	16.883	-89.108	530	10.1016/j.palaeo.2016.07.007		www.ncdc.noaa.gov/paleo/study/20506		Speleothem	reflectance	calcite	biophysical			"Thus, an increase in ultraviolet-stimulated luminescence (UVL) intensity is viewed as reflecting increases in soil productivity and vegetation above the cave (Shopov et al., 1994; McGarry and Baker, 2000). In the water-stressed Vaca Plateau, in- creased soil productivity is most likely to result from increased rainfall."	reflectance	grayscale	abs	P-E	@surface	monsoon	annual	annual	negative	-45.23	5244.91	0.11	3.02449	4.07	TRUE	CR		http://lipdverse.org/wNAm/0_15_0/Macal.Akers.2016.html
Marcella.Anderson.2007	Marcella	North America>Canada>Yukon Territory	60.0733	-133.805	749	10.1016/j.quascirev.2006.04.011		www.ncdc.noaa.gov/paleo/study/6066		LakeSediment	d18O	calcite in bulk sediment	isotope			P/E lake	d18O	permil	abs	P-E	lake@surface		summer	summerOnly	negative	-50	4732	29	0.627353	5.69	TRUE	SHA	Lat/lon updated to four decimals with Google Earth	http://lipdverse.org/wNAm/0_15_0/Marcella.Anderson.2007.html
Marion.Mathewes.1973	Marion	North America>Canada>British Columbia	49.3106	-122.548	305	10.1139/b73-271	10.1139/b81-100	wNAm	1705	LakeSediment	pollen	assemblage	pollen	MAT			temperature	degC	abs	T	air@surface		warmest month	summer+	positive	58	10542	89	0.572301	2.1	TRUE	CR, SHA	Check why were these not in temp12k. (SA) Lat/lon updated to four decimals with Google Earth, lake also called Jacobs lake.	http://lipdverse.org/wNAm/0_15_0/Marion.Mathewes.1973.html
Marion.Mathewes.1973	Marion	North America>Canada>British Columbia	49.3106	-122.548	305	10.1139/b73-271	10.1139/b81-100	wNAm	1705	LakeSediment	pollen	assemblage	pollen	MAT			temperature	degC	abs	T	air@surface		coldest month	winter+	positive	58	10542	89	0.572301	2	TRUE	CR, SHA	Check why were these not in temp12k. (SA) Lat/lon updated to four decimals with Google Earth, lake also called Jacobs lake.	http://lipdverse.org/wNAm/0_15_0/Marion.Mathewes.1973.html
Marion.Mathewes.1973	Marion	North America>Canada>British Columbia	49.3106	-122.548	305	10.1139/b73-271	10.1139/b81-100	wNAm	1705	LakeSediment	pollen	assemblage	pollen	MAT			temperature	degC	abs	T	air@surface		annual	annual	positive	58	10542	89	0.572301	3	TRUE	CR, SHA	Check why were these not in temp12k. (SA) Lat/lon updated to four decimals with Google Earth, lake also called Jacobs lake.	http://lipdverse.org/wNAm/0_15_0/Marion.Mathewes.1973.html
Marion.Mathewes.1973	Marion	North America>Canada>British Columbia	49.3106	-122.548	305	10.1139/b73-271	10.1139/b81-100	wNAm	1705	LakeSediment	pollen	assemblage	pollen	MAT			precipitation	mm	abs	P	amount@surface		annual	annual	positive	58	10542	89	0.572301	368	TRUE	CR, SHA	(SA) Lat/lon updated to four decimals with Google Earth, lake also called Jacobs lake	http://lipdverse.org/wNAm/0_15_0/Marion.Mathewes.1973.html
MD02_2503.Hill.2006	MD02_2503	Pacific Ocean>North Pacific Ocean	34.3862	-120.037	-569	10.1016/j.quascirev.2006.03.012		www.ncdc.noaa.gov/paleo/study/5582		MarineSediment	d18O	bulloides	isotope	Bayfoxm (byfox_predict.m) 10.1029/2019PA003576 Parameters: prior_mean=15.1862, prior_std=10, species=bulloides, bayes=unspecified; For d18osw, values are specified to change through time, and are calculated using the getvardelo.m program from Jess Tierney, based on the modern value of d18osw (-0.4821) for the archive location			temperature	degC	abs	T	sea@surface		annual	annual	positive	141.492	35767	138.041	0.927604	2.1	TRUE	JET, DSK		http://lipdverse.org/wNAm/0_15_0/MD02_2503.Hill.2006.html
MD02_2515.McClymont.2012	MD02_2515	Pacific Ocean>North Pacific Ocean	27.4835	-112.074	-881	10.1029/2011PA002226		10.1594/PANGAEA.861260		MarineSediment	alkenone	UK37	alkenone	Bayspline (UK_predict.m) 10.1002/2017PA003201 Parameters: pstd=10, bayes=unspecified		(SST calculated from Uk37 (TSid=WEB96b82a50) using the BAYSPLINE program UK_predict. Parameters: pstd=10, bayes=unspecified. Tex86 record is consistently 8C cooler than the alkenone record from the same site, probably because it is recording temperatures from below the thermocline around 50m.	temperature	degC	abs	T	sea@surface		annual	annual	positive	6825.4	24988.8	30.192	0.773007	1.7	TRUE	JET, DSK		http://lipdverse.org/wNAm/0_15_0/MD02_2515.McClymont.2012.html
MD02_2515.McClymont.2012	MD02_2515	Pacific Ocean>North Pacific Ocean	27.4835	-112.074	-881	10.1029/2011PA002226		10.1594/PANGAEA.861260		MarineSediment	GDGT	TEX86	other biomarker	Bayspar (bayspar_tex.m) 10.1016/j.gca.2013.11.026 Parameters: prior_std=10, runname=SST, varargin=1000,1		SST calculated from TEX86 (TSid=WEBdde62d62) using the BAYSPAR program bayspar_tex. Parameters: prior_std=10, runname=SST, varargin=1000,1. Tex86 record is consistently 8C cooler than the alkenone record from the same site, probably because it is recording temperatures from below the thermocline around 50m.	temperature	degC	abs	T	sea@surface		annual	annual	positive	6825.4	24988.8	46.85	0.773007	2.9	TRUE	JET, DSK		http://lipdverse.org/wNAm/0_15_0/MD02_2515.McClymont.2012.html
MD02-2499.Lopez.2018	MD02-2499	Pacific Ocean>North Pacific Ocean	41.6517	-124.938	-905	10.1029/2018PA003352		www.ncdc.noaa.gov/paleo/study/24150		MarineSediment	diatom	assemblage	other microfossil				temperature	degC	abs	T	sea@surface		summer	summerOnly	positive	8223	30956	405	0.529521	1.1	TRUE	CR	Untennable temperature scale (0-1600°C); less than 4000 years during the Holocene	http://lipdverse.org/wNAm/0_15_0/MD02-2499.Lopez.2018.html
MD02-2515.Bhattacharya.2018	Guaymas Basin	Pacific Ocean>North Pacific Ocean	27.48	-112.07	-881	10.1038/s41561-018-0220-7	10.1029/2011PA002226	www.ncdc.noaa.gov/paleo/study/24890		MarineSediment	dD	leaf wax	isotope			"Leaf-wax-based inferences of δD precipitation closely track changes in the proportion of annual rainfall that comes from the monsoon (expressed as the percentage of July–September (JAS) rainfall)"	precipitation	percent	abs	P	@surface	monsoon	summer	summerOnly	positive	5818	20995	110.3	0.64704	2.04	TRUE	CR		http://lipdverse.org/wNAm/0_15_0/MD02-2515.Bhattacharya.2018.html
MD02-2517.Bhattacharya.2018	Guaymas Basin	Pacific Ocean>North Pacific Ocean	27.48	-112.07	-881	10.1038/s41561-018-0220-7		www.ncdc.noaa.gov/paleo/study/24890		MarineSediment	dD	leaf wax	isotope			"Leaf-wax-based inferences of δD precipitation closely track changes in the proportion of annual rainfall that comes from the monsoon (expressed as the percentage of July–September (JAS) rainfall)"	precipitation	percent	abs	P	@surface	monsoon	summer	summerOnly	positive	1571.8	5795.4	144.8	1.89412	327.44	TRUE	CR		http://lipdverse.org/wNAm/0_15_0/MD02-2517.Bhattacharya.2018.html
MD02-2553.Poore.2009	Gulf of Mexico	Atlantic Ocean>North Atlantic Ocean>Gulf Of Mexico	27.1835	-91.4167	-2259	10.1130/G21040.1		wNAm		MarineSediment	foraminifera	single species	other microfossil			Digitized record from figure 22.7. "Warmer intervals would result in a more northerly av- erage position of the ITCZ and higher G. sac- culifer abundances in gulf sediments, whereas cooler intervals would result in a more south- erly average position of the ITCZ and lower G. sacculifer abundances in gulf sediments"	G.sacculifer	percent	abs	P	@surface	monsoon	summer	summerOnly	positive	220.117	9262.61	31.23	2.21178	1.51	TRUE	CR	Digitized record from figure 22.7.	http://lipdverse.org/wNAm/0_15_0/MD02-2553.Poore.2009.html
MeliLake.Anderson.2001	Meli Lake	North America>United States Of America>Alaska	68.6836	-149.075	741	10.1006/qres.2001.2219		www.ncdc.noaa.gov/paleo/study/5469		LakeSediment	d18O	sediment cellulose	isotope			P/E lake	d18O	permil	abs	P-E	lake@surface		annual	annual	negative	27.8	8682.4	366.6	0.693273	2.04	TRUE	JRR	cannot verify seasonality	http://lipdverse.org/wNAm/0_15_0/MeliLake.Anderson.2001.html
MicaLake.Schiff.2009	Mica Lake	Pacific Ocean>North Pacific Ocean>Gulf Of Alaska	60.95	-148.15	3	10.1007/s10933-008-9261-z		www.ncdc.noaa.gov/paleo/study/6202		LakeSediment	d18O	diatom	isotope				d18O	permil	abs	MODE	aleutianLow	aleutian low	winter	winterOnly	positive	-44	9504	186	1.67574	0.63	TRUE	CR		http://lipdverse.org/wNAm/0_15_0/MicaLake.Schiff.2009.html
MiddenCluster1.Harbert.2018	Midden Cluster 1	North America>United States Of America>Utah	37.9049	-110.13	1835	10.5334/oq.46	10.1038/s41597-020-0445-3	geochange.er.usgs.gov/midden/		Midden	macrofossils	assemblage	biophysical	Climate Reconstruction Analysis using Coexistence Likelihood Estimation			temperature	degC	abs	T	air@surface		annual	annual	positive	0	15211	27		2.1	TRUE	AD	this time series was generated for the Temp12k database; multiple sites were aggregated into clusters based on spatial proximity using a hierarchical clustering approach (hclust, base R), with an upper limit of 200 km	http://lipdverse.org/wNAm/0_15_0/MiddenCluster1.Harbert.2018.html
MiddenCluster1.Harbert.2018	Midden Cluster 1	North America>United States Of America>Utah	37.9049	-110.13	1835	10.5334/oq.46	10.1038/s41597-020-0445-3	geochange.er.usgs.gov/midden/		Midden	macrofossils	assemblage	biophysical				precipitation	mm	abs	P	amount@surface		annual	annual	positive	0	15211	27		368.42	TRUE	AD	This time series was generated for the wNAm database; multiple sites were aggregated into clusters based on spatial proximity using a hierarchical clustering approach (hclust, base R), with an upper limit of 200 km	http://lipdverse.org/wNAm/0_15_0/MiddenCluster1.Harbert.2018.html
MiddenCluster1.Harbert.2018	Midden Cluster 1	North America>United States Of America>Utah	37.9049	-110.13	1835	10.5334/oq.46	10.1038/s41597-020-0445-3	geochange.er.usgs.gov/midden/		Midden	macrofossils	assemblage	biophysical				waterBalance	mm	abs	P-E	@surface		annual	annual	positive	0	15211	27		368.42	TRUE	AD	This time series was generated for the wNAm database; multiple sites were aggregated into clusters based on spatial proximity using a hierarchical clustering approach (hclust, base R), with an upper limit of 200 km	http://lipdverse.org/wNAm/0_15_0/MiddenCluster1.Harbert.2018.html
MiddenCluster2.Harbert.2018	Midden Cluster 2	North America>United States Of America>Nevada	36.3806	-115.188	1297	10.5334/oq.46	10.1038/s41597-020-0445-3	geochange.er.usgs.gov/midden/		Midden	macrofossils	assemblage	biophysical	Climate Reconstruction Analysis using Coexistence Likelihood Estimation			temperature	degC	abs	T	air@surface		annual	annual	positive	0	47262	94.5		2.1	TRUE	AD	this time series was generated for the Temp12k database; multiple sites were aggregated into clusters based on spatial proximity using a hierarchical clustering approach (hclust, base R), with an upper limit of 200 km	http://lipdverse.org/wNAm/0_15_0/MiddenCluster2.Harbert.2018.html
MiddenCluster2.Harbert.2018	Midden Cluster 2	North America>United States Of America>Nevada	36.3806	-115.188	1297	10.5334/oq.46	10.1038/s41597-020-0445-3	geochange.er.usgs.gov/midden/		Midden	macrofossils	assemblage	biophysical				precipitation	mm	abs	P	amount@surface		annual	annual	positive	0	47262	94.5		368.42	TRUE	AD	This time series was generated for the wNAm database; multiple sites were aggregated into clusters based on spatial proximity using a hierarchical clustering approach (hclust, base R), with an upper limit of 200 km	http://lipdverse.org/wNAm/0_15_0/MiddenCluster2.Harbert.2018.html
MiddenCluster2.Harbert.2018	Midden Cluster 2	North America>United States Of America>Nevada	36.3806	-115.188	1297	10.5334/oq.46	10.1038/s41597-020-0445-3	geochange.er.usgs.gov/midden/		Midden	macrofossils	assemblage	biophysical				waterBalance	mm	abs	P-E	@surface		annual	annual	positive	0	47262	94.5		368.42	TRUE	AD	This time series was generated for the wNAm database; multiple sites were aggregated into clusters based on spatial proximity using a hierarchical clustering approach (hclust, base R), with an upper limit of 200 km	http://lipdverse.org/wNAm/0_15_0/MiddenCluster2.Harbert.2018.html
MiddenCluster3.Harbert.2018	Midden Cluster 3	North America>United States Of America>New Mexico	36.0589	-108.082	1848	10.5334/oq.46	10.1038/s41597-020-0445-3	geochange.er.usgs.gov/midden/		Midden	macrofossils	assemblage	biophysical	Climate Reconstruction Analysis using Coexistence Likelihood Estimation			temperature	degC	abs	T	air@surface		annual	annual	positive	0	13745	325		2.1	TRUE	AD	this time series was generated for the Temp12k database; multiple sites were aggregated into clusters based on spatial proximity using a hierarchical clustering approach (hclust, base R), with an upper limit of 200 km	http://lipdverse.org/wNAm/0_15_0/MiddenCluster3.Harbert.2018.html
MiddenCluster3.Harbert.2018	Midden Cluster 3	North America>United States Of America>New Mexico	36.0589	-108.082	1848	10.5334/oq.46	10.1038/s41597-020-0445-3	geochange.er.usgs.gov/midden/		Midden	macrofossils	assemblage	biophysical				precipitation	mm	abs	P	amount@surface		annual	annual	positive	0	13745	325		368.42	TRUE	AD	This time series was generated for the wNAm database; multiple sites were aggregated into clusters based on spatial proximity using a hierarchical clustering approach (hclust, base R), with an upper limit of 200 km	http://lipdverse.org/wNAm/0_15_0/MiddenCluster3.Harbert.2018.html
MiddenCluster3.Harbert.2018	Midden Cluster 3	North America>United States Of America>New Mexico	36.0589	-108.082	1848	10.5334/oq.46	10.1038/s41597-020-0445-3	geochange.er.usgs.gov/midden/		Midden	macrofossils	assemblage	biophysical				waterBalance	mm	abs	P-E	@surface		annual	annual	positive	0	13745	325		368.42	TRUE	AD	This time series was generated for the wNAm database; multiple sites were aggregated into clusters based on spatial proximity using a hierarchical clustering approach (hclust, base R), with an upper limit of 200 km	http://lipdverse.org/wNAm/0_15_0/MiddenCluster3.Harbert.2018.html
MiddenCluster4.Harbert.2018	Midden Cluster 4	North America>United States Of America>Idaho	43.6488	-112.745	1517	10.5334/oq.46	10.1038/s41597-020-0445-3	geochange.er.usgs.gov/midden/		Midden	macrofossils	assemblage	biophysical	Climate Reconstruction Analysis using Coexistence Likelihood Estimation			temperature	degC	abs	T	air@surface		annual	annual	positive	0	6645	317.5		2.1	TRUE	AD	this time series was generated for the Temp12k database; multiple sites were aggregated into clusters based on spatial proximity using a hierarchical clustering approach (hclust, base R), with an upper limit of 200 km	http://lipdverse.org/wNAm/0_15_0/MiddenCluster4.Harbert.2018.html
MiddenCluster4.Harbert.2018	Midden Cluster 4	North America>United States Of America>Idaho	43.6488	-112.745	1517	10.5334/oq.46	10.1038/s41597-020-0445-3	geochange.er.usgs.gov/midden/		Midden	macrofossils	assemblage	biophysical				precipitation	mm	abs	P	amount@surface		annual	annual	positive	0	6645	317.5		368.42	TRUE	AD	This time series was generated for the wNAm database; multiple sites were aggregated into clusters based on spatial proximity using a hierarchical clustering approach (hclust, base R), with an upper limit of 200 km	http://lipdverse.org/wNAm/0_15_0/MiddenCluster4.Harbert.2018.html
MiddenCluster4.Harbert.2018	Midden Cluster 4	North America>United States Of America>Idaho	43.6488	-112.745	1517	10.5334/oq.46	10.1038/s41597-020-0445-3	geochange.er.usgs.gov/midden/		Midden	macrofossils	assemblage	biophysical				waterBalance	mm	abs	P-E	@surface		annual	annual	positive	0	6645	317.5		368.42	TRUE	AD	This time series was generated for the wNAm database; multiple sites were aggregated into clusters based on spatial proximity using a hierarchical clustering approach (hclust, base R), with an upper limit of 200 km	http://lipdverse.org/wNAm/0_15_0/MiddenCluster4.Harbert.2018.html
MiddenCluster5.Harbert.2018	Midden Cluster 5	North America>United States Of America>New Mexico	32.4659	-106.02	1760	10.5334/oq.46	10.1038/s41597-020-0445-3	geochange.er.usgs.gov/midden/		Midden	macrofossils	assemblage	biophysical	Climate Reconstruction Analysis using Coexistence Likelihood Estimation			temperature	degC	abs	T	air@surface		annual	annual	positive	0	49968	105.5		2.1	TRUE	AD	this time series was generated for the Temp12k database; multiple sites were aggregated into clusters based on spatial proximity using a hierarchical clustering approach (hclust, base R), with an upper limit of 200 km	http://lipdverse.org/wNAm/0_15_0/MiddenCluster5.Harbert.2018.html
MiddenCluster5.Harbert.2018	Midden Cluster 5	North America>United States Of America>New Mexico	32.4659	-106.02	1760	10.5334/oq.46	10.1038/s41597-020-0445-3	geochange.er.usgs.gov/midden/		Midden	macrofossils	assemblage	biophysical				precipitation	mm	abs	P	amount@surface		annual	annual	positive	0	49968	105.5		368.42	TRUE	AD	This time series was generated for the wNAm database; multiple sites were aggregated into clusters based on spatial proximity using a hierarchical clustering approach (hclust, base R), with an upper limit of 200 km	http://lipdverse.org/wNAm/0_15_0/MiddenCluster5.Harbert.2018.html
MiddenCluster5.Harbert.2018	Midden Cluster 5	North America>United States Of America>New Mexico	32.4659	-106.02	1760	10.5334/oq.46	10.1038/s41597-020-0445-3	geochange.er.usgs.gov/midden/		Midden	macrofossils	assemblage	biophysical				waterBalance	mm	abs	P-E	@surface		annual	annual	positive	0	49968	105.5		368.42	TRUE	AD	This time series was generated for the wNAm database; multiple sites were aggregated into clusters based on spatial proximity using a hierarchical clustering approach (hclust, base R), with an upper limit of 200 km	http://lipdverse.org/wNAm/0_15_0/MiddenCluster5.Harbert.2018.html
MiddenCluster6.Harbert.2018	Midden Cluster 6	North America>United States Of America>New Mexico	32.4659	-106.02	1237	10.5334/oq.46	10.1038/s41597-020-0445-3	geochange.er.usgs.gov/midden/		Midden	macrofossils	assemblage	biophysical	Climate Reconstruction Analysis using Coexistence Likelihood Estimation			temperature	degC	abs	T	air@surface		annual	annual	positive	0	35082	172		2.1	TRUE	AD	this time series was generated for the Temp12k database; multiple sites were aggregated into clusters based on spatial proximity using a hierarchical clustering approach (hclust, base R), with an upper limit of 200 km	http://lipdverse.org/wNAm/0_15_0/MiddenCluster6.Harbert.2018.html
MiddenCluster6.Harbert.2018	Midden Cluster 6	North America>United States Of America>New Mexico	32.4659	-106.02	1237	10.5334/oq.46	10.1038/s41597-020-0445-3	geochange.er.usgs.gov/midden/		Midden	macrofossils	assemblage	biophysical				precipitation	mm	abs	P	amount@surface		annual	annual	positive	0	35082	172		368.42	TRUE	AD	This time series was generated for the wNAm database; multiple sites were aggregated into clusters based on spatial proximity using a hierarchical clustering approach (hclust, base R), with an upper limit of 200 km	http://lipdverse.org/wNAm/0_15_0/MiddenCluster6.Harbert.2018.html
MiddenCluster6.Harbert.2018	Midden Cluster 6	North America>United States Of America>New Mexico	32.4659	-106.02	1237	10.5334/oq.46	10.1038/s41597-020-0445-3	geochange.er.usgs.gov/midden/		Midden	macrofossils	assemblage	biophysical				waterBalance	mm	abs	P-E	@surface		annual	annual	positive	0	35082	172		368.42	TRUE	AD	This time series was generated for the wNAm database; multiple sites were aggregated into clusters based on spatial proximity using a hierarchical clustering approach (hclust, base R), with an upper limit of 200 km	http://lipdverse.org/wNAm/0_15_0/MiddenCluster6.Harbert.2018.html
MiddenCluster7.Harbert.2018	Midden Cluster 7	North America>United States Of America>California	34.1548	-116.005	573	10.5334/oq.46	10.1038/s41597-020-0445-3	geochange.er.usgs.gov/midden/		Midden	macrofossils	assemblage	biophysical	Climate Reconstruction Analysis using Coexistence Likelihood Estimation			temperature	degC	abs	T	air@surface		annual	annual	positive	1178	13803	197		2.1	TRUE	AD	this time series was generated for the Temp12k database; multiple sites were aggregated into clusters based on spatial proximity using a hierarchical clustering approach (hclust, base R), with an upper limit of 200 km	http://lipdverse.org/wNAm/0_15_0/MiddenCluster7.Harbert.2018.html
MiddenCluster7.Harbert.2018	Midden Cluster 7	North America>United States Of America>California	34.1548	-116.005	573	10.5334/oq.46	10.1038/s41597-020-0445-3	geochange.er.usgs.gov/midden/		Midden	macrofossils	assemblage	biophysical				precipitation	mm	abs	P	amount@surface		annual	annual	positive	1178	13803	197		368.42	TRUE	AD	This time series was generated for the wNAm database; multiple sites were aggregated into clusters based on spatial proximity using a hierarchical clustering approach (hclust, base R), with an upper limit of 200 km	http://lipdverse.org/wNAm/0_15_0/MiddenCluster7.Harbert.2018.html
MiddenCluster7.Harbert.2018	Midden Cluster 7	North America>United States Of America>California	34.1548	-116.005	573	10.5334/oq.46	10.1038/s41597-020-0445-3	geochange.er.usgs.gov/midden/		Midden	macrofossils	assemblage	biophysical				waterBalance	mm	abs	P-E	@surface		annual	annual	positive	1178	13803	197		368.42	TRUE	AD	This time series was generated for the wNAm database; multiple sites were aggregated into clusters based on spatial proximity using a hierarchical clustering approach (hclust, base R), with an upper limit of 200 km	http://lipdverse.org/wNAm/0_15_0/MiddenCluster7.Harbert.2018.html
MiddenCluster8.Harbert.2018	Midden Cluster 8	North America>United States Of America>Arizona	32.3106	-109.098	1339	10.5334/oq.46	10.1038/s41597-020-0445-3	geochange.er.usgs.gov/midden/		Midden	macrofossils	assemblage	biophysical	Climate Reconstruction Analysis using Coexistence Likelihood Estimation			temperature	degC	abs	T	air@surface		annual	annual	positive	144	34938	93		2.1	TRUE	AD	this time series was generated for the Temp12k database; multiple sites were aggregated into clusters based on spatial proximity using a hierarchical clustering approach (hclust, base R), with an upper limit of 200 km	http://lipdverse.org/wNAm/0_15_0/MiddenCluster8.Harbert.2018.html
MiddenCluster8.Harbert.2018	Midden Cluster 8	North America>United States Of America>Arizona	32.3106	-109.098	1339	10.5334/oq.46	10.1038/s41597-020-0445-3	geochange.er.usgs.gov/midden/		Midden	macrofossils	assemblage	biophysical				precipitation	mm	abs	P	amount@surface		annual	annual	positive	144	34938	93		368.42	TRUE	AD	This time series was generated for the wNAm database; multiple sites were aggregated into clusters based on spatial proximity using a hierarchical clustering approach (hclust, base R), with an upper limit of 200 km	http://lipdverse.org/wNAm/0_15_0/MiddenCluster8.Harbert.2018.html
MiddenCluster8.Harbert.2018	Midden Cluster 8	North America>United States Of America>Arizona	32.3106	-109.098	1339	10.5334/oq.46	10.1038/s41597-020-0445-3	geochange.er.usgs.gov/midden/		Midden	macrofossils	assemblage	biophysical				waterBalance	mm	abs	P-E	@surface		annual	annual	positive	144	34938	93		368.42	TRUE	AD	This time series was generated for the wNAm database; multiple sites were aggregated into clusters based on spatial proximity using a hierarchical clustering approach (hclust, base R), with an upper limit of 200 km	http://lipdverse.org/wNAm/0_15_0/MiddenCluster8.Harbert.2018.html
MiddenCluster9.Harbert.2018	Midden Cluster 9	North America>Mexico	31.6387	-115.555	782	10.5334/oq.46	10.1038/s41597-020-0445-3	geochange.er.usgs.gov/midden/		Midden	macrofossils	assemblage	biophysical	Climate Reconstruction Analysis using Coexistence Likelihood Estimation			temperature	degC	abs	T	air@surface		annual	annual	positive	609	54400	190		2.1	TRUE	AD	this time series was generated for the Temp12k database; multiple sites were aggregated into clusters based on spatial proximity using a hierarchical clustering approach (hclust, base R), with an upper limit of 200 km	http://lipdverse.org/wNAm/0_15_0/MiddenCluster9.Harbert.2018.html
MiddenCluster9.Harbert.2018	Midden Cluster 9	North America>Mexico	31.6387	-115.555	782	10.5334/oq.46	10.1038/s41597-020-0445-3	geochange.er.usgs.gov/midden/		Midden	macrofossils	assemblage	biophysical				precipitation	mm	abs	P	amount@surface		annual	annual	positive	609	54400	190		368.42	TRUE	AD	This time series was generated for the wNAm database; multiple sites were aggregated into clusters based on spatial proximity using a hierarchical clustering approach (hclust, base R), with an upper limit of 200 km	http://lipdverse.org/wNAm/0_15_0/MiddenCluster9.Harbert.2018.html
MiddenCluster9.Harbert.2018	Midden Cluster 9	North America>Mexico	31.6387	-115.555	782	10.5334/oq.46	10.1038/s41597-020-0445-3	geochange.er.usgs.gov/midden/		Midden	macrofossils	assemblage	biophysical				waterBalance	mm	abs	P-E	@surface		annual	annual	positive	609	54400	190		368.42	TRUE	AD	This time series was generated for the wNAm database; multiple sites were aggregated into clusters based on spatial proximity using a hierarchical clustering approach (hclust, base R), with an upper limit of 200 km	http://lipdverse.org/wNAm/0_15_0/MiddenCluster9.Harbert.2018.html
MinnetonkaCave.Lundeen.2013	Minnetonka Cave	North America>United States Of America>Idaho	42.088	-111.519	2346.96	10.1016/j.quaint.2013.03.018		www.ncdc.noaa.gov/paleo/study/23097		Speleothem	d13C	calciumcarbonate	isotope			"The rela- tionship indicates that wet conditions correspond with higher d13C values and dry conditions correspond with lower d13C values."	d13C	permil	abs	P	@surface		winter	winterOnly	positive	7.286	11121.9	6.802	1.52952	87.58	TRUE	CR		http://lipdverse.org/wNAm/0_15_0/MinnetonkaCave.Lundeen.2013.html
MinnetonkaCave.Lundeen.2013	Minnetonka Cave	North America>United States Of America>Idaho	42.088	-111.519	2346.96	10.1016/j.quaint.2013.03.018		www.ncdc.noaa.gov/paleo/study/23097		Speleothem	d18O	calcite	isotope				d18O	permil	abs	T	air@surface		winter	winterOnly	positive	7.286	11121.9	6.802	1.52952	237.1	TRUE	KR	authors write, "we can say with confidence that regardless of the other contributing mechanisms, the speleothem 18O variability is reflective of temperature change"	http://lipdverse.org/wNAm/0_15_0/MinnetonkaCave.Lundeen.2013.html
Minucua.Goman.2018	Lago Minucua	North America>Mexico	17.079	-97.609	2510	10.1016/j.quaint.2017.01.027		wNAm		LakeSediment	MS	HRMS of core face	biophysical			"significantly wetter conditions at Minucua, particularly demonstrated by the high HRMS data"	MS	SI	abs	P	runoff@surface	monsoon	summer	summerOnly	positive	-58	4490	4.173	0	2.04	TRUE	mfg, SHA	no chron table	http://lipdverse.org/wNAm/0_10_0/Minucua.Goman.2018.html
Minucua.Goman.2018	Lago Minucua	North America>Mexico	17.079	-97.609	2510	10.1016/j.quaint.2017.01.027		wNAm		LakeSediment	varve	varve width	biophysical				Varve_width	cm	abs	P	runoff@surface	monsoon	annual	annual	positive	71	4484	1	0	28.41	TRUE	mfg, SHA	no chron table	http://lipdverse.org/wNAm/0_10_0/Minucua.Goman.2018.html
MLake.Ritchie.1977	M Lake	North America>Canada>Northwest Territories	68.27	-133.47	105	10.2307/1942175	10.1038/nature25464	www.ncdc.noaa.gov/paleo/study/27330	10.21233/N33H1H	LakeSediment	pollen	assemblage	pollen	MAT			temperature	degC	abs	T	air@surface		warmest month	summer+	positive	0	10699	102.5	0.467333	2	TRUE	DSK	age gap 3.6 ka; but 5 ages, evenly spaced	http://lipdverse.org/wNAm/0_15_0/MLake.Ritchie.1977.html
MLake.Ritchie.1977	M Lake	North America>Canada>Northwest Territories	68.27	-133.47	105	10.2307/1942175	10.1038/nature25464	www.ncdc.noaa.gov/paleo/study/27330	10.21233/N33H1H	LakeSediment	pollen	assemblage	pollen	MAT			temperature	degC	abs	T	air@surface		coldest month	winter+	positive	0	10699	102.5	0.467333	3	TRUE	DSK	age gap 3.6 ka; but 5 ages, evenly spaced	http://lipdverse.org/wNAm/0_15_0/MLake.Ritchie.1977.html
MLake.Ritchie.1977	M Lake	North America>Canada>Northwest Territories	68.27	-133.47	105	10.2307/1942175	10.1038/nature25464	www.ncdc.noaa.gov/paleo/study/27330	10.21233/N33H1H	LakeSediment	pollen	assemblage	pollen	MAT			temperature	degC	abs	T	air@surface		annual	annual	positive	0	10699	102.5	0.467333	2.1	TRUE	DSK	age gap 3.6 ka; but 5 ages, evenly spaced	http://lipdverse.org/wNAm/0_15_0/MLake.Ritchie.1977.html
MLake.Ritchie.1977	M Lake	North America>Canada>Northwest Territories	68.27	-133.47	105	10.2307/1942175	10.1038/nature25464	www.ncdc.noaa.gov/paleo/study/27330	10.21233/N33H1H	LakeSediment	pollen	assemblage	pollen	MAT			precipitation	mm	abs	P	amount@surface		annual	annual	positive	0	10699	102.5	0.467333	368	TRUE	JM	Pecipitation reconstruction generated with, and using methods described in Marsicek 2018. Reconstruction published as part of the wNAm database.	http://lipdverse.org/wNAm/0_15_0/MLake.Ritchie.1977.html
MooseLake.Clegg.2010	Moose Lake	North America>United States Of America>Alaska	61.3742	-143.599	437	10.1016/j.quascirev.2010.08.001		www.ncdc.noaa.gov/paleo/study/15444		LakeSediment	chironomid	assemblage	chironomid	WAPLS	7	northwest North American training set (Barley 2006)	temperature	degC	abs	T	air@surface		summer	summerOnly	positive	-20.035	6007.66	37.846	1.65901	1.4	TRUE	MTO, YLA		http://lipdverse.org/wNAm/0_15_0/MooseLake.Clegg.2010.html
MorrisPond.Morris.2013	Morris pond	North America>United States Of America>Utah	37.6744	-112.775	3126	10.1016/j.yqres.2012.10.002		wNAm		LakeSediment	pollen	ratio	pollen			"The Artemisia/ Chenopodiaceae (AC) ratio is commonly used as a qualitative proxy for past annual growing season moisture availability in arid and semi-arid regions because Artemisia requires more growing season moisture than Chenopodiaceae"	ArtAmb	unitless	abs	P-E	@surface	monsoon	summer	summerOnly	positive	-58.162	8674.18	65.71	0.801617	0.42	TRUE	JLM		http://lipdverse.org/wNAm/0_15_0/MorrisPond.Morris.2013.html
MorrisPond.Morris.2013	Morris pond	North America>United States Of America>Utah	37.6744	-112.775	3126	10.1016/j.yqres.2012.10.002		wNAm		LakeSediment	pollen	ratio	pollen				ArtChenoSar	unitless	abs	P-E	@surface		summer	summerOnly	positive	-58.162	8674.18	65.71	0.801617	14.08	TRUE	JLM		http://lipdverse.org/wNAm/0_15_0/MorrisPond.Morris.2013.html
MV0811-14JC.Du.2018	Mv0811-14JC	Pacific Ocean>North Pacific Ocean	34.3	-120	-591	10.1016/j.margeo.2017.11.014		wNAm		MarineSediment	stratigraphy	flood layers	biophysical			flood	thickness	cm	abs	P	flood@surface		annual	annual	positive	1912	9065	60	7.96868	0.09	TRUE	SHA, CR	Data entered from table 2 of paper; Lat/lon updated to four decimals with Google Earth	http://lipdverse.org/wNAm/0_15_0/MV0811-14JC.Du.2018.html
MV99_PC14.Marchitto.2010	MV99_PC14	Pacific Ocean>North Pacific Ocean	25.2012	-112.717	-541	10.1126/science.1194887		www.ncdc.noaa.gov/paleo/study/10415		MarineSediment	Mg/Ca	bulloides	Mg/Ca	Baymag (baymag_predict.m) github.com/jesstierney/BAYMAG Parameters: omega=0.95858, salinity=34.157, pH=8.0466, clean=1, species=bulloides, pstd=10, varargin=0			temperature	degC	abs	T	sea@surface		annual	annual	positive	2221.6	13811.8	41.5	0.920396	1.9	TRUE	JET, DSK		http://lipdverse.org/wNAm/0_15_0/MV99_PC14.Marchitto.2010.html
MV99-GC31.Barron.2012	MV99-GC31	Pacific Ocean>North Pacific Ocean	23.4672	-111.599	-705	10.1029/2011PA002235		10.1594/PANGAEA.824830?format=html#download		MarineSediment	BSi	bulk sediment	biophysical			Percent opal and number of diatoms/gram interpreted as inversly related to SST. Infering relative SST from upwelling.	BSi	percent	abs	upwelling	upwelling@surface		annual	annual	negative	824	13465	168	0.984252	0.15	TRUE	CR	cannot verify seasonality	http://lipdverse.org/wNAm/0_15_0/MV99-GC31.Barron.2012.html
MV99-GC41_PC14.Arellano-Torres.2019	MV99-GC41/PC14	Pacific Ocean>North Pacific Ocean	25.2	-112.717	-540	10.1029/2018PA003479		10.1594/PANGAEA.896898		MarineSediment	particle size	bulk sediment	biophysical			fine fraction (dust <6.6 μm); when values are >55% discrete inputs of dust arrived at the core site (e.g., ~12, 10.7, 8.5, 7, 6, and 2.5 ka), possibly controlled by the combined effect of aridity episodes on land, followed by the storms and turbulence needed to inject dust into the troposphere	Percent_fine_fraction	percent	abs	DUST	@surface		annual	annual	positive	503.279	12537.5	85.891	0.956795	0.15	TRUE	SHA	Climate interpretation likely wet/dry periods; lat/lon updated to four decimals using google earth	http://lipdverse.org/wNAm/0_15_0/MV99-GC41_PC14.Arellano-Torres.2019.html
NBJ2015iso.Wong.2015	Natural Bridge Caverns	North America>United States Of America>Texas	29.69	-98.34	304	10.1016/j.quascirev.2015.06.023		wNAm		Speleothem	Sr	calcite trace elements	biophysical			Sr, digitized from figure 4, panel b, Wong et al., 2015. "we interpret variations in NBJ trace-element concentrations to reflect relative changes in moisture conditions"	Sr	ppm	abs	P-E	@surface		annual	annual	negative	88.458	7000	35.383		18.32	TRUE	CR	Sr, digitized from figure 4, panel b, Wong et al., 2015. "we interpret variations in NBJ trace-element concentrations to reflect relative changes in moisture conditions"	http://lipdverse.org/wNAm/0_15_0/NBJ2015iso.Wong.2015.html
NevadaPrecip.Hughes.1996	Nevada Climate Division 3	North America>United States Of America>Nevada	37.8	-115.8	1700			www.ncdc.noaa.gov/paleo/study/6384		Wood	TRW	tree ring width	biophysical				precipitation	mm	abs	P	amount@surface		annual	annual	positive	-46	7950	1		6.58	TRUE	SHA	DOI was incorrect, correct citation included but no DOI	http://lipdverse.org/wNAm/0_15_0/NevadaPrecip.Hughes.1996.html
NH-8P.Bhattacharya.2018	Mexican Marin	Pacific Ocean>North Pacific Ocean	22.23	-107.05	-1018	10.1038/s41561-018-0220-7	10.1029/98PA02508	www.ncdc.noaa.gov/paleo/study/24890		MarineSediment	dD	leaf wax	isotope			JASPrecipPercent	precipitation	percent	abs	P	@surface	monsoon	summer	summerOnly	positive	1460	24266	358.8	0.379507	4.34	TRUE	CR		http://lipdverse.org/wNAm/0_15_0/NH-8P.Bhattacharya.2018.html
NorthCraterLake.Palmer.2002	North Crater Lake	North America>Canada>British Columbia	49.07	-120.02	2120	10.1023/A:1021644122727		www.ncdc.noaa.gov/paleo/study/27330		LakeSediment	chironomid	assemblage	chironomid	WAPLS	7	51 lakes from British Columbia (Palmer et al. 2002)	temperature	degC	abs	T	air@surface		summer	summerOnly	positive	7.341	12602.4	219.184	0.667075	1.4	TRUE	DSK, MTO, YLA		http://lipdverse.org/wNAm/0_15_0/NorthCraterLake.Palmer.2002.html
ODP_167_1019C.Barron.2003	ODP_167_1019C	Pacific Ocean>North Pacific Ocean	41.6829	-124.932	-946	10.1029/2002PA000768		10.1594/PANGAEA.841946		MarineSediment	alkenone	UK37	alkenone	Bayspline (UK_predict.m) 10.1002/2017PA003201 Parameters: pstd=10, bayes=unspecified			temperature	degC	abs	T	sea@surface		annual	annual	positive	160	14940	130	1.18243	1.7	TRUE	LJ, DSK, JET		http://lipdverse.org/wNAm/0_15_0/ODP_167_1019C.Barron.2003.html
ODP1019.Barron.2003	ODP1019	Pacific Ocean>North Pacific Ocean	41.682	-124.93	-980	10.1029/2002PA000768		www.ncdc.noaa.gov/paleo/study/5867		MarineSediment	CaCO3	bulk sediment	biophysical			CaCO3MAR	upwelling	g/cm2/yr	abs	upwelling	upwelling@surface		annual	annual	negative	160	15800	110	1.18243	7.73	TRUE	CR		http://lipdverse.org/wNAm/0_15_0/ODP1019.Barron.2003.html
ODP1019.Barron.2003	ODP1019	Pacific Ocean>North Pacific Ocean	41.682	-124.93	-980	10.1029/2002PA000768		www.ncdc.noaa.gov/paleo/study/5867		MarineSediment	diatom	single species	other microfossil			Thalassionema_nitzschioides	upwelling	percent	abs	upwelling	upwelling@surface		annual	annual	positive	160	14780	130	1.18243	8.87	TRUE	CR		http://lipdverse.org/wNAm/0_15_0/ODP1019.Barron.2003.html
ODP1019.Barron.2003	ODP1019	Pacific Ocean>North Pacific Ocean	41.682	-124.93	-980	10.1029/2002PA000768		www.ncdc.noaa.gov/paleo/study/5867		MarineSediment	pollen	single species	pollen			"Increasingly warm and dry continental conditions are suggested for the early part of the middle Holocene by a steady decline in alder pollen and modest increase in oak; but starting at ca. 5.2 ka, coastal redwood (Sequoia sempervirens) and alder begin a steady rise, arguing for increasing effective moisture and the development of the north coast temperate rain forest."	Alnus	percent	abs	P-E	@surface		annual	annual	positive	160	16090	130	1.18243	8.1	TRUE	CR		http://lipdverse.org/wNAm/0_15_0/ODP1019.Barron.2003.html
ODP1019.Barron.2003	ODP1019	Pacific Ocean>North Pacific Ocean	41.682	-124.93	-980	10.1029/2002PA000768		www.ncdc.noaa.gov/paleo/study/5867		MarineSediment	pollen	single species	pollen			Coastal fog and effective moisture "Increasingly warm and dry continental conditions are suggested for the early part of the middle Holocene by a steady decline in alder pollen and modest increase in oak; but starting at ca. 5.2 ka, coastal redwood (Sequoia sempervirens) and alder begin a steady rise, arguing for increasing effective moisture and the development of the north coast temperate rain …	Sequoia	percent	abs	P-E	upwelling@surface		annual	annual	positive	160	16090	130	1.18243	0.41	TRUE	DSK		http://lipdverse.org/wNAm/0_15_0/ODP1019.Barron.2003.html
ODP1019.Lopez.2018	ODP1019	Pacific Ocean>North Pacific Ocean	41.683	-124.933	-980	10.1029/2018PA003352		www.ncdc.noaa.gov/paleo/study/24150		MarineSediment	diatom	assemblage	other microfossil				temperature	degC	abs	T	sea@surface		annual	annual	positive	31	7244	365.5	1.52502	1.1	TRUE	CR		http://lipdverse.org/wNAm/0_15_0/ODP1019.Lopez.2018.html
OregonCaves.Ersek.2012	Oregon Caves	North America>United States Of America>Oregon	42.083	-123.416	1390	10.1038/ncomms2222		www.ncdc.noaa.gov/paleo/study/13543		Speleothem	d13C	calcite	isotope			"An increase in precipitation may cause lower speleothem d13C directly through its effects on cave hydrology and indirectly through its influence on surface biomass"	d13C	permil	abs	P-E	@surface		winter	winterOnly	positive	234.28	7991.74	2.58	3.60943	1.07	TRUE	CR	The hydrologic system at OCNM responds rapidly to these seasonal changes in precipitation. Observations at the cave show that after summer desiccation, dripwater is initiated within a month of the onset of the winter rainy season, and ends in the early summer after runoff of snowmelt.	http://lipdverse.org/wNAm/0_15_0/OregonCaves.Ersek.2012.html
OregonCaves.Ersek.2012	Oregon Caves	North America>United States Of America>Oregon	42.083	-123.416	1390	10.1038/ncomms2222		www.ncdc.noaa.gov/paleo/study/13543		Speleothem	d18O	calcite	isotope			“hydrologic system at OCNM responds rapidly to these seasonal changes in precipitation. Observations at the cave show that after summer desiccation, dripwater is initiated within a month of the onset of the winter rainy season, and ends in the early summer after runoff of snowmelt.” (Ersek et al., 2012)	d18O	permil	abs	T	air@condensation		winter	winterOnly	positive	234.28	7991.74	2.58	3.60943	0.23	TRUE	KR	hydrologic system at OCNM responds rapidly to these seasonal changes in precipitation. Observations at the cave show that after summer desiccation, dripwater is initiated within a month of the onset of the winter rainy season, and ends in the early summer after runoff of snowmelt.	http://lipdverse.org/wNAm/0_15_0/OregonCaves.Ersek.2012.html
OroLake.Michels.2007	Oro Lake	North America>Canada>Saskatchewan	49.7842	-105.349	686	10.1111/j.1365-2486.2007.01367.x		www.ncdc.noaa.gov/paleo/study/23073	20690	LakeSediment	diatom	assemblage	other microfossil				logSalinity	g	abs	P-E	lakeSalinity		annual	annual	negative	76.284	6896.14	21.687	1.02641	0.36	TRUE	CR	seasonality not specified but infered from general discussion in text	http://lipdverse.org/wNAm/0_15_0/OroLake.Michels.2007.html
OwensLake.Benson.2002	OwensLake	North America>United States Of America>California	36.4367	-117.968	1085	10.1016/S0277-3791(01)00048-8		www.ncdc.noaa.gov/paleo/study/5472		LakeSediment	d18O	calcite in bulk sediment	isotope			P/E lake	d18O	permil	abs	P-E	lake@surface		annual	annual	positive	1018.28	13516.7	63.14	1.91227	2.89	TRUE	CR	closed lake P-E d180 interpreation	http://lipdverse.org/wNAm/0_15_0/OwensLake.Benson.2002.html
P1B3.deVernal.2005	P1B3	Arctic Ocean	73.683	-162.66	-201	10.1029/2005PA001157		www.ncdc.noaa.gov/paleo/study/15444		MarineSediment	dinocyst	assemblage	other microfossil				temperature	degC	abs	T	sea@surface		summer	summer+	positive	125.61	9626	49.9	1.05259	1.7	TRUE	LJ		http://lipdverse.org/wNAm/0_15_0/P1B3.deVernal.2005.html
P1B3.deVernal.2005	P1B3	Arctic Ocean	73.683	-162.66	-201	10.1029/2005PA001157		www.ncdc.noaa.gov/paleo/study/15444		MarineSediment	dinocyst	assemblage	other microfossil				Sea_Ice_months	months/year	abs	ICE	sea@surface		annual	annual	positive	125.61	9626	49.9	1.05259	1.57	TRUE	CR		http://lipdverse.org/wNAm/0_15_0/P1B3.deVernal.2005.html
P1B3.deVernal.2005	P1B3	Arctic Ocean	73.683	-162.66	-201	10.1029/2005PA001157		www.ncdc.noaa.gov/paleo/study/15444		MarineSediment	dinocyst	assemblage	other microfossil				temperatureComposite	degC	anom	T	sea@surface		summer + winter	annual	positive	125.61	9626	49.9	1.05259	1.2	TRUE	LJ	this timeseries was composited programmatically, with the assumption that all values are measured at equivalent levels	http://lipdverse.org/wNAm/0_15_0/P1B3.deVernal.2005.html
ParadiseLake.Steinman.2016	Paradise	North America>Canada>British Columbia	54.685	-122.617	733	10.1016/j.quascirev.2016.04.012		www.ncdc.noaa.gov/paleo/study/21250		LakeSediment	d18O	calcite in bulk sediment	isotope			P/E lake	d18O	permil	abs	P-E	lake@surface		winter	winterOnly	negative	-57.5	9100.4	17.4	1.52873	0.73	TRUE	CR		http://lipdverse.org/wNAm/0_15_0/ParadiseLake.Steinman.2016.html
ParadiseLake.Steinman.2016	Paradise	North America>Canada>British Columbia	54.685	-122.617	733	10.1016/j.quascirev.2016.04.012		www.ncdc.noaa.gov/paleo/study/21250		LakeSediment	d13C	organic carbon in bulk sediment	isotope			lake level	d13C	permil	abs	P-E	lakeLevel@surface		winter	winterOnly	negative	-57.5	9100.4	17.4	1.52873	0.71	TRUE	CR		http://lipdverse.org/wNAm/0_15_0/ParadiseLake.Steinman.2016.html
ParkPond1.Lynch.1998	Park Pond 1	North America>United States Of America>Wyoming	43.47	-109.96	2705	10.1890/0012-9658(1998)079[1320:OOAPFV]2.0.CO;2	10.1038/nature25464	www.ncdc.noaa.gov/paleo/study/27330	10.21233/N3175N	LakeSediment	pollen	assemblage	pollen	MAT			temperature	degC	abs	T	air@surface		warmest month	summer+	positive	227	5233	224	0.399521	2	TRUE	TB		http://lipdverse.org/wNAm/0_15_0/ParkPond1.Lynch.1998.html
ParkPond1.Lynch.1998	Park Pond 1	North America>United States Of America>Wyoming	43.47	-109.96	2705	10.1890/0012-9658(1998)079[1320:OOAPFV]2.0.CO;2	10.1038/nature25464	www.ncdc.noaa.gov/paleo/study/27330	10.21233/N3175N	LakeSediment	pollen	assemblage	pollen	MAT			temperature	degC	abs	T	air@surface		coldest month	winter+	positive	227	5233	224	0.399521	3	TRUE	TB		http://lipdverse.org/wNAm/0_15_0/ParkPond1.Lynch.1998.html
ParkPond1.Lynch.1998	Park Pond 1	North America>United States Of America>Wyoming	43.47	-109.96	2705	10.1890/0012-9658(1998)079[1320:OOAPFV]2.0.CO;2	10.1038/nature25464	www.ncdc.noaa.gov/paleo/study/27330	10.21233/N3175N	LakeSediment	pollen	assemblage	pollen	MAT			temperature	degC	abs	T	air@surface		annual	annual	positive	227	5233	224	0.399521	2.1	TRUE	TB		http://lipdverse.org/wNAm/0_15_0/ParkPond1.Lynch.1998.html
ParkPond1.Lynch.1998	Park Pond 1	North America>United States Of America>Wyoming	43.47	-109.96	2705	10.1890/0012-9658(1998)079[1320:OOAPFV]2.0.CO;2	10.1038/nature25464	www.ncdc.noaa.gov/paleo/study/27330	10.21233/N3175N	LakeSediment	pollen	assemblage	pollen	MAT			precipitation	mm	abs	P	amount@surface		annual	annual	positive	227	5233	224	0.399521	368	TRUE	JM	Pecipitation reconstruction generated with, and using methods described in Marsicek 2018. Reconstruction published as part of the wNAm database.	http://lipdverse.org/wNAm/0_15_0/ParkPond1.Lynch.1998.html
PinkPanther.Asmerom.2007	Pink Panther	North America>United States Of America>New Mexico	32.083	-105.167	1245	10.1130/G22865A.1		www.ncdc.noaa.gov/paleo/study/9739		Speleothem	d18O	calcite	isotope				d18O	permil	abs	P	amount@surface	monsoon	annual	annual	negative	25	12087	17	2.75574	0.48	TRUE	CR		http://lipdverse.org/wNAm/0_15_0/PinkPanther.Asmerom.2007.html
Pixie.Brown.2002	Pixie	North America>Canada>British Columbia	48.6	-124.2	70	10.1139/X01-197	10.1038/nature25464	www.ncdc.noaa.gov/paleo/study/27330	10.21233/N3C36R	LakeSediment	pollen	assemblage	pollen	MAT			temperature	degC	abs	T	air@surface		warmest month	summer+	positive	19	10754	144	0.558919	2	TRUE	TB	min temperaturs in this record @ 7ka contrast regional trends (KJB)	http://lipdverse.org/wNAm/0_15_0/Pixie.Brown.2002.html
Pixie.Brown.2002	Pixie	North America>Canada>British Columbia	48.6	-124.2	70	10.1139/X01-197	10.1038/nature25464	www.ncdc.noaa.gov/paleo/study/27330	10.21233/N3C36R	LakeSediment	pollen	assemblage	pollen	MAT			temperature	degC	abs	T	air@surface		coldest month	winter+	positive	19	10754	144	0.558919	3	TRUE	TB	min temperaturs in this record @ 7ka contrast regional trends (KJB)	http://lipdverse.org/wNAm/0_15_0/Pixie.Brown.2002.html
Pixie.Brown.2002	Pixie	North America>Canada>British Columbia	48.6	-124.2	70	10.1139/X01-197	10.1038/nature25464	www.ncdc.noaa.gov/paleo/study/27330	10.21233/N3C36R	LakeSediment	pollen	assemblage	pollen	MAT			temperature	degC	abs	T	air@surface		annual	annual	positive	19	10754	144	0.558919	2.1	TRUE	TB	min temperaturs in this record @ 7ka contrast regional trends (KJB)	http://lipdverse.org/wNAm/0_15_0/Pixie.Brown.2002.html
PixieLake.Brown.2006	Pixie Lake	North America>Canada>British Columbia	48.6	-124.2	67	10.1016/j.quascirev.2006.02.020		wNAm	10.21233/N3C36R	LakeSediment	pollen	assemblage	pollen	DWHI-MAP		reflect the relationship between species distribution and precipitation in the seasonal rainforest. MAP_updated	precipitation	mm	abs	P	amount@surface		annual	annual	positive	-44	11974	145.5	0.58246	368	TRUE	KJB		http://lipdverse.org/wNAm/0_15_0/PixieLake.Brown.2006.html
Posy.Shafer.1989	Posy Lake	North America>United States Of America>Utah	37.94	-111.7	2653	Shafer, D.S. 1989. The timing of late Quaternary monsoon precipitation maxima in the southwest United States. Doctoral dissertation. University of Arizona, Tucson, Arizona, USA.	10.1038/nature25464	www.ncdc.noaa.gov/paleo/study/27330	10.21233/N3BS9G	LakeSediment	pollen	assemblage	pollen	MAT			temperature	degC	abs	T	air@surface		warmest month	summer+	positive	-39	9366.6	315	0.531598	2	TRUE	TB	cannot validate elevation	http://lipdverse.org/wNAm/0_15_0/Posy.Shafer.1989.html
Posy.Shafer.1989	Posy Lake	North America>United States Of America>Utah	37.94	-111.7	2653	Shafer, D.S. 1989. The timing of late Quaternary monsoon precipitation maxima in the southwest United States. Doctoral dissertation. University of Arizona, Tucson, Arizona, USA.	10.1038/nature25464	www.ncdc.noaa.gov/paleo/study/27330	10.21233/N3BS9G	LakeSediment	pollen	assemblage	pollen	MAT			temperature	degC	abs	T	air@surface		coldest month	winter+	positive	-39	9366.6	315	0.531598	3	TRUE	TB	cannot validate elevation	http://lipdverse.org/wNAm/0_15_0/Posy.Shafer.1989.html
Posy.Shafer.1989	Posy Lake	North America>United States Of America>Utah	37.94	-111.7	2653	Shafer, D.S. 1989. The timing of late Quaternary monsoon precipitation maxima in the southwest United States. Doctoral dissertation. University of Arizona, Tucson, Arizona, USA.	10.1038/nature25464	www.ncdc.noaa.gov/paleo/study/27330	10.21233/N3BS9G	LakeSediment	pollen	assemblage	pollen	MAT			temperature	degC	abs	T	air@surface		annual	annual	positive	-39	9366.6	315	0.531598	2.1	TRUE	TB	cannot validate elevation	http://lipdverse.org/wNAm/0_15_0/Posy.Shafer.1989.html
Posy.Shafer.1989	Posy Lake	North America>United States Of America>Utah	37.94	-111.7	2653	Shafer, D.S. 1989. The timing of late Quaternary monsoon precipitation maxima in the southwest United States. Doctoral dissertation. University of Arizona, Tucson, Arizona, USA.	10.1038/nature25464	www.ncdc.noaa.gov/paleo/study/27330	10.21233/N3BS9G	LakeSediment	pollen	assemblage	pollen	MAT			precipitation	mm	abs	P	amount@surface		annual	annual	positive	-39	9366.6	315	0.531598	368	TRUE	JM	Pecipitation reconstruction generated with, and using methods described in Marsicek 2018. Reconstruction published as part of the wNAm database.	http://lipdverse.org/wNAm/0_15_0/Posy.Shafer.1989.html
PyramidLake.Benson.2001	Pyramid Lake	North America>United States Of America>Nevada	40.072	-119.584	1156	10.1016/S0277-3791(01)00048-8		https://www.ncdc.noaa.gov/paleo/study/5472		LakeSediment	d18O	calcite in bulk sediment	isotope			P/E lake	d18O	permil	abs	P-E	lake@surface		annual	annual	negative	108	7629.89	8	3.98836	1.09	TRUE	CR		http://lipdverse.org/wNAm/0_15_0/PyramidLake.Benson.2001.html
Quartz.Wooller.2012	Quartz Lake	North America>United States Of America>Alaska	64.206	-145.814	293	10.1007/s10933-012-9610-9	10.5194/cp-10-1605-2014	www.ncdc.noaa.gov/paleo/study/15444		LakeSediment	chironomid	assemblage	chironomid	WAPLS	7	northwest North American training set (Barley 2006)	temperature	degC	abs	T	air@surface		summer	summerOnly	positive	777	10949	193.5	1.37633	1.4	TRUE	YLA, MTO		http://lipdverse.org/wNAm/0_15_0/Quartz.Wooller.2012.html
rainbow.Clegg.2011	Rainbow Lake	North America>United States Of America>Alaska	60.7167	-150.8	63	10.1073/pnas.1110913108	10.5194/cp-10-1605-2014	www.ncdc.noaa.gov/paleo/study/15444		LakeSediment	chironomid	assemblage	chironomid	WAPLS	7	northwest North American training set (Barley 2006)	temperature	degC	abs	T	air@surface		summer	summerOnly	positive	-54	13505.5	307.139	0.99552	1.4	TRUE	MTO, YLA		http://lipdverse.org/wNAm/0_15_0/rainbow.Clegg.2011.html
RainbowLake.Shuman.2016	Rainbow Lake	North America>United States Of America>Wyoming	44.94	-109.5	2960	10.1016/j.quascirev.2016.03.009		wNAm		LakeSediment	stratigraphy	core transect	biophysical				lakeLevel	m	abs	P-E	lakeLevel@surface		annual	annual	positive	50	17900	50		0.94	TRUE	SHA		http://lipdverse.org/wNAm/0_15_0/RainbowLake.Shuman.2016.html
Ranger.Brubaker.1983	Ranger Lake	North America>United States Of America>Alaska	67.15	-153.65	820	10.1016/0033-5894(83)90077-7		www.ncdc.noaa.gov/paleo/study/15444	10.21233/N31659	LakeSediment	pollen	assemblage	pollen	MAT			temperature	degC	anom	T	air@surface		coldest	winter+	positive	0	35525	323	0.416667	3	TRUE	TB		http://lipdverse.org/wNAm/0_15_0/Ranger.Brubaker.1983.html
Ranger.Brubaker.1983	Ranger Lake	North America>United States Of America>Alaska	67.15	-153.65	820	10.1016/0033-5894(83)90077-7		www.ncdc.noaa.gov/paleo/study/15444	10.21233/N31659	LakeSediment	pollen	assemblage	pollen	MAT			temperature	degC	anom	T	air@surface		warmest month	summer+	positive	0	35525	323	0.416667	2	TRUE	TB		http://lipdverse.org/wNAm/0_15_0/Ranger.Brubaker.1983.html
Ranger.Brubaker.1983	Ranger Lake	North America>United States Of America>Alaska	67.15	-153.65	820	10.1016/0033-5894(83)90077-7		www.ncdc.noaa.gov/paleo/study/15444	10.21233/N31659	LakeSediment	pollen	assemblage	pollen	MAT			temperatureComposite	degC	anom	T	air@surface		coldest + warmest month	annual	positive	0	35525	323	0.416667	2.1	TRUE	TB, CR	This time series was generated as the average of summer and winter reconstructions. Original programatic composite was incorrect.	http://lipdverse.org/wNAm/0_15_0/Ranger.Brubaker.1983.html
RantinLake.Pompeani.2012	Rantin Lake	North America>Canada>Yukon Territory	60.0296	-129.032	720	10.1007/s10933-012-9602-9		www.ncdc.noaa.gov/paleo/study/13095		LakeSediment	CaCO3	bulk sediment	biophysical			"Higher carbonate concentrations in Core A-06 sediment after 9,500 cal yr BP indicates declining lake levels"	CaCO3	percent	abs	P-E	lakeLevel@surface		annual	annual	negative	3108	10940	30	1.53218	3.7	TRUE	SHA		http://lipdverse.org/wNAm/0_15_0/RantinLake.Pompeani.2012.html
Rapid.Fall.1994	Rapid	North America>United States Of America>Wyoming	42.73	-109.19	3134	Fall, P.L. 1988. Vegetation dynamics in the southern Rocky Mountains: late Pleistocene and Holocene timberline fluctuations. Doctoral dissertation. University of Arizona, Tucson, Arizona, USA.	10.1038/nature25464	www.ncdc.noaa.gov/paleo/study/27330	10.21233/N3GJ0W	LakeSediment	pollen	assemblage	pollen	MAT			temperature	degC	abs	T	air@surface		warmest month	summer+	positive	0	10599	341.5	0.471743	2	TRUE	TB, DSK	fails age control, gap >3000 years (largest gap is 3700 yrs); five well-spaced ages in the Holocene	http://lipdverse.org/wNAm/0_15_0/Rapid.Fall.1994.html
Rapid.Fall.1994	Rapid	North America>United States Of America>Wyoming	42.73	-109.19	3134	Fall, P.L. 1988. Vegetation dynamics in the southern Rocky Mountains: late Pleistocene and Holocene timberline fluctuations. Doctoral dissertation. University of Arizona, Tucson, Arizona, USA.	10.1038/nature25464	www.ncdc.noaa.gov/paleo/study/27330	10.21233/N3GJ0W	LakeSediment	pollen	assemblage	pollen	MAT			temperature	degC	abs	T	air@surface		coldest month	winter+	positive	0	10599	341.5	0.471743	3	TRUE	TB, DSK	fails age control, gap >3000 years (largest gap is 3700 yrs); five well-spaced ages in the Holocene	http://lipdverse.org/wNAm/0_15_0/Rapid.Fall.1994.html
Rapid.Fall.1994	Rapid	North America>United States Of America>Wyoming	42.73	-109.19	3134	Fall, P.L. 1988. Vegetation dynamics in the southern Rocky Mountains: late Pleistocene and Holocene timberline fluctuations. Doctoral dissertation. University of Arizona, Tucson, Arizona, USA.	10.1038/nature25464	www.ncdc.noaa.gov/paleo/study/27330	10.21233/N3GJ0W	LakeSediment	pollen	assemblage	pollen	MAT			temperature	degC	abs	T	air@surface		annual	annual	positive	0	10599	341.5	0.471743	2.1	TRUE	TB, DSK	fails age control, gap >3000 years (largest gap is 3700 yrs); five well-spaced ages in the Holocene	http://lipdverse.org/wNAm/0_15_0/Rapid.Fall.1994.html
Rapid.Fall.1994	Rapid	North America>United States Of America>Wyoming	42.73	-109.19	3134	Fall, P.L. 1988. Vegetation dynamics in the southern Rocky Mountains: late Pleistocene and Holocene timberline fluctuations. Doctoral dissertation. University of Arizona, Tucson, Arizona, USA.	10.1038/nature25464	www.ncdc.noaa.gov/paleo/study/27330	10.21233/N3GJ0W	LakeSediment	pollen	assemblage	pollen	MAT			precipitation	mm	abs	P	amount@surface		annual	annual	positive	0	10599	341.5	0.471743	368	TRUE	JM	Pecipitation reconstruction generated with, and using methods described in Marsicek 2018. Reconstruction published as part of the wNAm database.	http://lipdverse.org/wNAm/0_15_0/Rapid.Fall.1994.html
RC12-10.Poore.2003	RC12-10	Atlantic Ocean>North Atlantic Ocean>Gulf Of Mexico	23	-95.53	-3054	10.1029/2002PA000868		www.ncdc.noaa.gov/paleo/study/27330		MarineSediment	foraminifera	assemblage	other microfossil				temperature	degC	abs	T	sea@surface		winter	winterOnly	positive	614.285	13980.2	62.24	0.526976	1.4	TRUE	LJ	digitized record. SST based on figure 3, bottom right panel	http://lipdverse.org/wNAm/0_15_0/RC12-10.Poore.2003.html
RedRock.Maher.1972	Red Rock	North America>United States Of America>Colorado	40.08	-105.54	3095	10.1016/0033-5894(72)90090-7	10.1038/nature25464	www.ncdc.noaa.gov/paleo/study/27330	10.21233/N3236Z	LakeSediment	pollen	assemblage	pollen	MAT			temperature	degC	abs	T	air@surface		warmest month	summer+	positive	-239.8	10883.4	241.35	0.899022	2	TRUE	DSK	untenable minimum age	http://lipdverse.org/wNAm/0_15_0/RedRock.Maher.1972.html
RedRock.Maher.1972	Red Rock	North America>United States Of America>Colorado	40.08	-105.54	3095	10.1016/0033-5894(72)90090-7	10.1038/nature25464	www.ncdc.noaa.gov/paleo/study/27330	10.21233/N3236Z	LakeSediment	pollen	assemblage	pollen	MAT			temperature	degC	abs	T	air@surface		coldest month	winter+	positive	-239.8	10883.4	241.35	0.899022	3	TRUE	DSK	untenable minimum age	http://lipdverse.org/wNAm/0_15_0/RedRock.Maher.1972.html
RedRock.Maher.1972	Red Rock	North America>United States Of America>Colorado	40.08	-105.54	3095	10.1016/0033-5894(72)90090-7	10.1038/nature25464	www.ncdc.noaa.gov/paleo/study/27330	10.21233/N3236Z	LakeSediment	pollen	assemblage	pollen	MAT			temperature	degC	abs	T	air@surface		annual	annual	positive	-239.8	10883.4	241.35	0.899022	2.1	TRUE	DSK	untenable minimum age	http://lipdverse.org/wNAm/0_15_0/RedRock.Maher.1972.html
RedRock.Maher.1972	Red Rock	North America>United States Of America>Colorado	40.08	-105.54	3095	10.1016/0033-5894(72)90090-7	10.1038/nature25464	www.ncdc.noaa.gov/paleo/study/27330	10.21233/N3236Z	LakeSediment	pollen	assemblage	pollen	MAT			precipitation	mm	abs	P	amount@surface		annual	annual	positive	-239.8	10883.4	241.35	0.899022	368	TRUE	JM	Pecipitaton reconstruction generated with, and using methods described in Marsicek 2018. Reconstruction published as part of the wNAm database.	http://lipdverse.org/wNAm/0_15_0/RedRock.Maher.1972.html
RhamnusLake.Brown.2006	Rhamnus Lake	North America>Canada>British Columbia	48.63	-123.72	324	10.1016/j.quascirev.2006.02.020		wNAm		LakeSediment	pollen	assemblage	pollen	DWHI-MAP		MAP_updated	precipitation	mm	abs	P	amount@surface		annual	annual	positive	-40	11059	176	0.540589	368	TRUE	KJB	3215-year chronology gap but includes 6 well distributed Holocene dates.	http://lipdverse.org/wNAm/0_15_0/RhamnusLake.Brown.2006.html
SanJuanRiverDischarge.Brown.2015	San Juan River Discharge	North America>Canada>British Columbia	48.58	-124.31	0	10.1016/j.yqres.2015.03.003		wNAm		LakeSediment	pollen	assemblage	pollen	DWHI-MAP and gauging station		streamflow	discharge	mm	abs	P	riverFlow@surface		annual	annual	positive	0	10000	250		163	TRUE	KJB, GS	no chronology because integrating multiple lakes to reconstruct the river flow	http://lipdverse.org/wNAm/0_15_0/SanJuanRiverDischarge.Brown.2015.html
SanJuanRiverDischarge.Brown.2015	San Juan River Discharge	North America>Canada>British Columbia	48.58	-124.31	0	10.1016/j.yqres.2015.03.003		wNAm		LakeSediment	pollen	assemblage	pollen	DWHI-MAP and gauging station			discharge	mm	abs	P	riverFlow@surface		AMJJAS	summer+	positive	0	10000	250		163	TRUE	KJB, GS	no chronology because integrating multiple lakes to reconstruct the river flow	http://lipdverse.org/wNAm/0_15_0/SanJuanRiverDischarge.Brown.2015.html
SanJuanRiverDischarge.Brown.2015	San Juan River Discharge	North America>Canada>British Columbia	48.58	-124.31	0	10.1016/j.yqres.2015.03.003		wNAm		LakeSediment	pollen	assemblage	pollen	DWHI-MAP and gauging station			discharge	mm	abs	P	riverFlow@surface		10 11 12 1 2 3	winter+	positive	0	10000	250		163	TRUE	KJB, GS	no chronology because integrating multiple lakes to reconstruct the river flow	http://lipdverse.org/wNAm/0_15_0/SanJuanRiverDischarge.Brown.2015.html
SchellingsBog.Barron.2004	Schellings Bog	North America>United States Of America>California	40.28	-123.36	910			wNAm		LakeSediment	pollen	single species	pollen				Fir	percent	abs	P-E	@surface		annual	annual	positive	0	4780	50	0.627615	11.94	TRUE	JRR		http://lipdverse.org/wNAm/0_15_0/SchellingsBog.Barron.2004.html
SchellingsBog.Barron.2004	Schellings Bog	North America>United States Of America>California	40.28	-123.36	910			wNAm		LakeSediment	pollen	single species	pollen				Quercus	percent	abs	P-E	@surface		annual	annual	positive	0	4780	50	0.627615	6.75	TRUE	JRR		http://lipdverse.org/wNAm/0_15_0/SchellingsBog.Barron.2004.html
ScreamingLynxLake.Clegg.2011	Screaming Lynx Lake	North America>United States Of America>Alaska	66.0667	-145.4	223	10.1073/pnas.1110913108		www.ncdc.noaa.gov/paleo/study/15444		LakeSediment	chironomid	assemblage	chironomid	WAPLS	7	northwest North American training set (Barley 2006)	temperature	degC	abs	T	air@surface		summer	summerOnly	positive	-43	10611	55	1.31406	1.4	TRUE	MTO, YLA	the largest age control gap is 3435 uncal yrs, accepted with relaxing criteria: important record from the region	http://lipdverse.org/wNAm/0_15_0/ScreamingLynxLake.Clegg.2011.html
SilverLake.Kirby.2015	Silver Lake	North America>United States Of America>California	35.3669	-116.135	277	10.1016/j.yqres.2015.07.003		www.ncdc.noaa.gov/paleo/study/20106		LakeSediment	particle size	bulk sediment	biophysical			"Here, we propose a depositional model stating that high percent clay values (or intervals of clay dominance) indicate persistent standing water wherein the deposition, accumulation, and preservation of fine- grained sediment exceeds an undefined critical thickness that inhibits deflation during succeeding desiccation events or ephemeral lake environments."	clay	percent	abs	P-E	lakeLevel@surface		annual	annual	positive	1521.2	14826.1	40.9	0.668015	17.06	TRUE	CR	Chronology gap > 3000 years, but fills important geographic region	http://lipdverse.org/wNAm/0_15_0/SilverLake.Kirby.2015.html
SilverLake.Kirby.2015	Silver Lake	North America>United States Of America>California	35.3669	-116.135	277	10.1016/j.yqres.2015.07.003		www.ncdc.noaa.gov/paleo/study/20106		LakeSediment	particle size	bulk sediment	biophysical				sand	percent	abs	P-E	lakeLevel@surface		annual	annual	negative	1521.2	14826.1	40.9	0.668015	17.31	TRUE	CR	Chronology gap > 3000 years, but fills important geographic region	http://lipdverse.org/wNAm/0_15_0/SilverLake.Kirby.2015.html
SilverLake.Kirby.2015	Silver Lake	North America>United States Of America>California	35.3669	-116.135	277	10.1016/j.yqres.2015.07.003		www.ncdc.noaa.gov/paleo/study/20106		LakeSediment	C/N	bulk sediment	biophysical			"Perennial lakes pro- mote lake productivity producing low Corg:Ntotal ratios. Ephemeral lakes are associated with higher Corg:Ntotal ratios as the contribution of terrestrial organic matter increases in the presence of lower lake levels and the subsequent encroachment of terrestrial organics onto the playa surface."	C/N	unitless	abs	P-E	@surface		annual	annual	negative	1929.1	12545.2	40.6	0.695072	3.17	TRUE	CR	Chronology gap > 3000 years, but fills important geographic region	http://lipdverse.org/wNAm/0_15_0/SilverLake.Kirby.2015.html
SouthernCalifornia.Ohlwein.2012	Southern California	North America>United States Of America>California	33.7689	-116.66	2399	10.1016/j.quascirev.2011.11.002		www.ncdc.noaa.gov/paleo/study/27330	15594, 15494	Peat	pollen	assemblage	pollen	GLM-inversion		this timeseries was composited from two sites in southern california	temperature	degC	anom	T	air@surface		7	summerOnly	positive	408	11446	352	0.634173	2	TRUE	TB, ERW	timeseries was composited from two sites in southern california (lat/long/elevation is for one site)	http://lipdverse.org/wNAm/0_15_0/SouthernCalifornia.Ohlwein.2012.html
SouthernCalifornia.Ohlwein.2012	Southern California	North America>United States Of America>California	33.7689	-116.66	2399	10.1016/j.quascirev.2011.11.002		www.ncdc.noaa.gov/paleo/study/27330	15594, 15494	Peat	pollen	assemblage	pollen				Panom	cm	abs	P	@surface		annual	annual	positive	408	11446	352	0.634173	7.45	TRUE	CR		http://lipdverse.org/wNAm/0_15_0/SouthernCalifornia.Ohlwein.2012.html
Station803.Bringue.2012	Station 803	Arctic Ocean>Beaufort Sea	70.6328	-135.88	-218	10.1016/j.margeo.2011.11.004	10.1016/j.quascirev.2013.07.006	www.ncdc.noaa.gov/paleo/study/27910		MarineSediment	dinocyst	assemblage	other microfossil	MAT			temperature	degC	abs	T	sea@surface		8	summerOnly	positive	256.45	4589.6	70.7	0.923116	1.7	TRUE	LJ, MBR	piston core time series only, core top is not modern	http://lipdverse.org/wNAm/0_15_0/Station803.Bringue.2012.html
Station803.Bringue.2012	Station 803	Arctic Ocean>Beaufort Sea	70.6328	-135.88	-218	10.1016/j.margeo.2011.11.004	10.1016/j.quascirev.2013.07.006	www.ncdc.noaa.gov/paleo/study/27910		MarineSediment	dinocyst	assemblage	other microfossil	MAT		duration of sea-ice cover	IMON1953	months/year	abs	ICE	sea@surface		annual	annual	positive	256.45	4589.6	70.7	0.923116	0.43	TRUE	CR		http://lipdverse.org/wNAm/0_15_0/Station803.Bringue.2012.html
StellaLake.Reinemann.2009	Stella Lake	North America>United States Of America>Nevada	39.005	-114.32	3170	10.1016/j.yqres.2009.06.003		www.ncdc.noaa.gov/paleo/study/27330		LakeSediment	chironomid	assemblage	chironomid	WAPLS	7	Porinchu et al (2007, 2010) training set	temperature	degC	abs	T	air@surface		summer	summerOnly	positive	0	6678.09	74.368	0.598974	1.4	TRUE	MTO, YLA, SAR, DFP, BGM		http://lipdverse.org/wNAm/0_15_0/StellaLake.Reinemann.2009.html
StewartBog.Jimenez-Moreno.2008	Stewart Bog	North America>United States Of America>New Mexico	35.8323	-105.722	3116	10.1016/j.quascirev.2008.04.004		wNAm	15356, 15355	Peat	pollen	single species	pollen			Pinus edulis: a good approximate of changes in winter precipitation.	Pinyon	percent	abs	P-E	@surface		winter	winterOnly	positive	31	14325.5	64.9	0.919041	3.2	TRUE	CR		http://lipdverse.org/wNAm/0_15_0/StewartBog.Jimenez-Moreno.2008.html
StewartBog.Jimenez-Moreno.2008	Stewart Bog	North America>United States Of America>New Mexico	35.8323	-105.722	3116	10.1016/j.quascirev.2008.04.004		wNAm	15356, 15355	Peat	pollen	ratio	pollen			Indication for the relative position of upper treeline	Picea/Pinus	unitless	abs	T	air@surface		annual	annual	positive	31	14325.5	64.9	0.919041	0.25	TRUE	CR	This pollen ratio time series was generated for the wNAm database.	http://lipdverse.org/wNAm/0_15_0/StewartBog.Jimenez-Moreno.2008.html
StewartBog.Jimenez-Moreno.2008	Stewart Bog	North America>United States Of America>New Mexico	35.8323	-105.722	3116	10.1016/j.quascirev.2008.04.004		wNAm	15356, 15355	Peat	pollen	ratio	pollen			Ratio to relative shifts between the subalpine and the lower altitudinal steppe vegetation belts. A proxy for the elevation of treeline	Picea/Artemisia	unitless	abs	T	air@surface		annual	annual	positive	31	14325.5	64.9	0.919041	1.75	TRUE	CR	This pollen ratio time series was generated for the wNAm database.	http://lipdverse.org/wNAm/0_15_0/StewartBog.Jimenez-Moreno.2008.html
StewartBog.Jimenez-Moreno.2008	Stewart Bog	North America>United States Of America>New Mexico	35.8323	-105.722	3116	10.1016/j.quascirev.2008.04.004		wNAm	15356, 15355	Peat	pollen	ratio	pollen			Indication for the relative position of lower treeline	Pinus/Artemisia	unitless	abs	T	air@surface		annual	annual	positive	31	14325.5	64.9	0.919041	2.91	TRUE	CR	This pollen ratio time series was generated for the wNAm database.	http://lipdverse.org/wNAm/0_15_0/StewartBog.Jimenez-Moreno.2008.html
SwanLake.Schmieder.2011	Swan Lake	North America>United States Of America>Nebraska	42.16	-99.03	702	10.1016/j.quascirev.2011.04.011		wNAm		LakeSediment	diatom	assemblage	other microfossil			DI_lake_depth	lakeLevel	m	abs	P-E	lakeLevel@surface		annual	annual	negative	46	8429.3	51.4875	0.596424	0.23	TRUE	CR	Record duration < 4000 years (3719)	http://lipdverse.org/wNAm/0_15_0/SwanLake.Schmieder.2011.html
Takahula.Clegg.2010	Takahula	North America>United States Of America>Alaska	67.35	-153.667	275	10.1016/j.quascirev.2009.12.009		www.ncdc.noaa.gov/paleo/study/8663		LakeSediment	d18O	charastem encrustations	isotope				d18O	permil	abs	P-E	lake@surface		annual	annual	negative	-50.5	8132	59	1.09991	3.61	TRUE	CR		http://lipdverse.org/wNAm/0_15_0/Takahula.Clegg.2010.html
TangledUpLake.Anderson.2001	Tangled Up Lake	North America>United States Of America>Alaska	67.6667	-149.075	440	10.1006/qres.2001.2219		www.ncdc.noaa.gov/paleo/study/5469		LakeSediment	d18O	charophyte calcite	isotope			"Summer temperature shifts are based on oxygen isotope analyses of endogenic calcite from Tangled Up Lake"	d18O	permil	abs	T	air@surface		2008-06-07	summerOnly	positive	0	6757	71.5	2.07193	10.62	TRUE	EKT	isotopes at this lake are also affected by evaporation	http://lipdverse.org/wNAm/0_15_0/TangledUpLake.Anderson.2001.html
TiagoLake.Jimenez-Moreno.2011	Tiago Lake	North America>United States Of America>Colorado	40.5803	-106.613	2700	10.1130/B30240.1		wNAm		LakeSediment	pollen	single species	pollen			Pinus edulis: a good approximate of changes in winter precipitation.	Pinyon	percent	abs	P-E	@surface		winter	winterOnly	positive	36	14299	44	0.919425	5.68	TRUE	CR		http://lipdverse.org/wNAm/0_15_0/TiagoLake.Jimenez-Moreno.2011.html
TiagoLake.Jimenez-Moreno.2011	Tiago Lake	North America>United States Of America>Colorado	40.5803	-106.613	2700	10.1130/B30240.1		wNAm		LakeSediment	pollen	ratio	pollen			Indication for the relative position of upper treeline	Picea/Pinus	unitless	abs	T	air@surface		annual	annual	positive	36	14299	44	0.919425	4.94	TRUE	CR	This pollen ratio time series was generated for the wNAm database.	http://lipdverse.org/wNAm/0_15_0/TiagoLake.Jimenez-Moreno.2011.html
TiagoLake.Jimenez-Moreno.2011	Tiago Lake	North America>United States Of America>Colorado	40.5803	-106.613	2700	10.1130/B30240.1		wNAm		LakeSediment	pollen	ratio	pollen			Indication for the relative position of lower treeline	Picea/Artemisia	unitless	abs	T	air@surface		annual	annual	positive	36	14299	44	0.919425	8.37	TRUE	CR	This pollen ratio time series was generated for the wNAm database.	http://lipdverse.org/wNAm/0_15_0/TiagoLake.Jimenez-Moreno.2011.html
TiagoLake.Jimenez-Moreno.2011	Tiago Lake	North America>United States Of America>Colorado	40.5803	-106.613	2700	10.1130/B30240.1		wNAm		LakeSediment	pollen	ratio	pollen			Ratio to relative shifts between the subalpine and the lower altitudinal steppe vegetation belts. A proxy for the elevation of treeline	Pinus/Artemisia	unitless	abs	T	air@surface		annual	annual	positive	36	14299	44	0.919425	3.38	TRUE	CR	This pollen ratio time series was generated for the wNAm database.	http://lipdverse.org/wNAm/0_15_0/TiagoLake.Jimenez-Moreno.2011.html
TN062-0550.Barron.2018	TN062-0550	Pacific Ocean>North Pacific Ocean	40.8656	-124.573	-569	10.1016/j.quaint.2016.10.039		www.ncdc.noaa.gov/paleo/study/27330	not in Neotoma	MarineSediment	pollen	assemblage	pollen				Picea	percent	abs	T	air@surface		winter	winterOnly	positive	284.48	6231.4	68.03	2.01785	8.99	TRUE	TB, LJ	this is a marine sediment record with terrestrial pollen. The reconstruction is therefore not necessarily representative of the precise location	http://lipdverse.org/wNAm/0_15_0/TN062-0550.Barron.2018.html
TN062-0550.Barron.2018	TN062-0550	Pacific Ocean>North Pacific Ocean	40.8656	-124.573	-569	10.1016/j.quaint.2016.10.039		www.ncdc.noaa.gov/paleo/study/27330	not in Neotoma	MarineSediment	pollen	single species	pollen			Sequoia, upwelling/coastal fog	Sequoia	percent	abs	P-E	@surface		annual	annual	positive	284.48	6231.4	68.03	2.01785	12.34	TRUE	CR	cannot verify seasonality	http://lipdverse.org/wNAm/0_15_0/TN062-0550.Barron.2018.html
TN062-0550.Barron.2018	TN062-0550	Pacific Ocean>North Pacific Ocean	40.8656	-124.573	-569	10.1016/j.quaint.2016.10.039		www.ncdc.noaa.gov/paleo/study/27330	not in Neotoma	MarineSediment	pollen	single species	pollen				Quercus	percent	abs	P-E	@surface		summer	summerOnly	negative	284.48	6231.4	68.03	2.01785	1.47	TRUE	CR		http://lipdverse.org/wNAm/0_15_0/TN062-0550.Barron.2018.html
TN062-0550.Barron.2018	TN062-0550	Pacific Ocean>North Pacific Ocean	40.8656	-124.573	-569	10.1016/j.quaint.2016.10.039		www.ncdc.noaa.gov/paleo/study/27330	not in Neotoma	MarineSediment	pollen	single species	pollen			wet/dry	Alnus	percent	abs	P-E	@surface		annual	annual	positive	284.48	6231.4	68.03	2.01785	1.2	TRUE	CR	cannot verify seasonality	http://lipdverse.org/wNAm/0_15_0/TN062-0550.Barron.2018.html
TN062-0550.Barron.2018	TN062-0550	Pacific Ocean>North Pacific Ocean	40.8656	-124.573	-569	10.1016/j.quaint.2016.10.039		www.ncdc.noaa.gov/paleo/study/27330	not in Neotoma	MarineSediment	diatom	single species	other microfossil			Dc_stapedia	upwelling	percent	abs	upwelling	upwelling@surface		summer	summerOnly	negative	220	6300	140	1.97368	0.59	TRUE	CR		http://lipdverse.org/wNAm/0_15_0/TN062-0550.Barron.2018.html
TN062-0550.Barron.2018	TN062-0550	Pacific Ocean>North Pacific Ocean	40.8656	-124.573	-569	10.1016/j.quaint.2016.10.039		www.ncdc.noaa.gov/paleo/study/27330	not in Neotoma	MarineSediment	diatom	single species	other microfossil			Dc_stapedia_spinosa	upwelling	percent	abs	upwelling	upwelling@surface		summer	summerOnly	negative	220	6300	140	1.97368	0.11	TRUE	CR		http://lipdverse.org/wNAm/0_15_0/TN062-0550.Barron.2018.html
TN062-0550.Barron.2018	TN062-0550	Pacific Ocean>North Pacific Ocean	40.8656	-124.573	-569	10.1016/j.quaint.2016.10.039		www.ncdc.noaa.gov/paleo/study/27330	not in Neotoma	MarineSediment	diatom	single species	other microfossil			total_Dc_stapedia	upwelling	percent	abs	upwelling	upwelling@surface		summer	summerOnly	negative	220	6300	140	1.97368	0.2	TRUE	CR		http://lipdverse.org/wNAm/0_15_0/TN062-0550.Barron.2018.html
TN062-0550.Barron.2018	TN062-0550	Pacific Ocean>North Pacific Ocean	40.8656	-124.573	-569	10.1016/j.quaint.2016.10.039		www.ncdc.noaa.gov/paleo/study/27330	not in Neotoma	MarineSediment	diatom	single species	other microfossil			S_speculum_var_minutus	upwelling	percent	abs	upwelling	upwelling@surface		summer	summerOnly	positive	220	6300	140	1.97368	2.41	TRUE	CR		http://lipdverse.org/wNAm/0_15_0/TN062-0550.Barron.2018.html
Trout.Irvine.2012	Trout Lake	North America>Canada>Yukon Territory	68.828	-138.75	150	10.1007/s10933-012-9612-7	10.5194/cp-10-1605-2014	www.ncdc.noaa.gov/paleo/study/15444		LakeSediment	chironomid	assemblage	chironomid	WAPLS	7	One-component model using Barley et al. 2006 calibration data set. Temperature reconstruction contains a splice of data from two cores, taken at two different water depths (see original paper for descriptions); this allowed for a continuous reconstruction from early to late Holocene. Chronology provided only for bottom ("deep-water") core: this choice was made for consistency with the previous da…	temperature	degC	abs	T	air@surface		summer	summerOnly	positive	63	15424.5	146.1	0.502639	1.4	TRUE	DSK, YLA, MTO	fails age control, barely; accepted because chronology is solid	http://lipdverse.org/wNAm/0_15_0/Trout.Irvine.2012.html
UpperBigCreek.Shuman.2015	Upper Big Creek Lake	North America>United States Of America>Colorado	40.91	-106.62	2750	10.1016/j.yqres.2015.07.004		wNAm		LakeSediment	stratigraphy	core transect	biophysical			Elevation below modern	lakeLevel	cm	abs	P-E	lakeLevel@surface		annual	annual	negative	50	12650	50	0.585774	136.2	TRUE	CR	Record staturated (overflowing) in last 2 ka	http://lipdverse.org/wNAm/0_15_0/UpperBigCreek.Shuman.2015.html
UpperFly.Bunbury.2009	Upper Fly	North America>Canada>Yukon Territory	61.07	-138.09	1326	10.1016/j.quascirev.2008.10.007	10.5194/cp-10-1605-2014	www.ncdc.noaa.gov/paleo/study/15444	10.21233/1AGN-VG81	LakeSediment	pollen	assemblage	pollen	MAT			temperature	degC	abs	T	air@surface		7	summerOnly	positive	0	13416.8	244.797	0.583333	2	TRUE	TB, DSK	age gap of 4.2 ka. Retain this high resolution site with 7 radiocarbon ages in the Holocene	http://lipdverse.org/wNAm/0_15_0/UpperFly.Bunbury.2009.html
UpperFly.Bunbury.2009	Upper Fly	North America>Canada>Yukon Territory	61.07	-138.09	1326	10.1016/j.quascirev.2008.10.007	10.5194/cp-10-1605-2014	www.ncdc.noaa.gov/paleo/study/15444	10.21233/1AGN-VG81	LakeSediment	pollen	assemblage	pollen	MAT			precipitation	mm	abs	P	amount@surface		annual	annual	positive	0	13416.8	244.797	0.583333	368	TRUE	CR	age gap of 4.2 ka. Retain this high resolution site with 7 radiocarbon ages in the Holocene	http://lipdverse.org/wNAm/0_15_0/UpperFly.Bunbury.2009.html
UpperPintoFen.Yu.2003	Upper Pinto Fen	North America>Canada>Alberta	53.5833	-118.017	1310	10.1191/0959683603hl667ft		www.ncdc.noaa.gov/paleo/study/13665		Peat	DBD	dry bulk density	biophysical			wet/dry	peatFlux	g/cm3	abs	P-E	@surface		annual	annual	negative	-50	8017	19.8	0	0.02	TRUE	SHA	SHA LiPD link does not work; I have fixed the chrondata in the csv file but need to change the lipd	http://lipdverse.org/globalHolocene/current_version/UpperPintoFen.Yu.2003.html
W8709-13PC.Lopez.2018	W8709-13PC	Pacific Ocean>North Pacific Ocean	42.117	-125.75	-2712	10.1029/2018PA003352		www.ncdc.noaa.gov/paleo/study/24150		MarineSediment	diatom	assemblage	other microfossil				temperature	degC	abs	T	sea@surface		annual	annual	positive	6276	26444	191	0.349406	1.1	TRUE	CR		http://lipdverse.org/wNAm/0_15_0/W8709-13PC.Lopez.2018.html
WA01.Rainville.2013	WA01	North America>Canada>Yukon Territory	61.2447	-136.926	1000	10.1139/cjes-2012-0103		www.ncdc.noaa.gov/paleo/study/18435		LakeSediment	TOC	bulk sediment	biophysical			LOI	LOI	percent	abs	P-E	@surface		annual	annual	negative	-57.925	12906.3	44.414	0.580531	14.7	TRUE	CR		http://lipdverse.org/wNAm/0_15_0/WA01.Rainville.2013.html
Waskey.Levy.2004	Waskey Lake	North America>United States Of America>Alaska	59.8794	-159.207	150	10.1191/0959683604hl675rp	10.5194/cp-10-1605-2014	www.ncdc.noaa.gov/paleo/study/15444		LakeSediment	TOC	bulk sediment	biophysical				OM	percent	abs	T	air@surface		summer	summer+	positive	71.15	10978.7	61.15	0.641755	1.32	TRUE	DSK		http://lipdverse.org/wNAm/0_15_0/Waskey.Levy.2004.html
Windy.Chase.2008	Windy Lake	North America>Canada>British Columbia	49.8133	-117.877	1814	10.1016/j.palaeo.2007.10.020	10.1890/12-1742.1	www.ncdc.noaa.gov/paleo/study/27330		LakeSediment	chironomid	assemblage	chironomid	7 inference models and a composite (see Chase et al. 2008)	7	53 lakes from Brithis Columbia (Rosenberg et al 2004)	temperature	degC	abs	T	air@surface		summer	summerOnly	positive	507	13048	171.5	0.609066	1.4	TRUE	MTO, IRW		http://lipdverse.org/wNAm/0_15_0/Windy.Chase.2008.html
Wolverine.Mann.2002	Wolverine Lake	North America>United States Of America>Alaska	67.098	-158.914	52	10.1016/S0277-3791(01)00120-2		www.ncdc.noaa.gov/paleo/study/23070		LakeSediment	MAR	mass accumulation rate	biophysical			FEB	MAR	g/cm2/yr	abs	P-E	@surface		annual	annual	negative	23.794	7407.4	27.325	2.84414	0.03	TRUE	CR	Suspicious anomaly in MAR record	http://lipdverse.org/wNAm/0_15_0/Wolverine.Mann.2002.html
YellowLake.Anderson.2012	Yellow Lake	North America>United States Of America>Colorado	39.652	-107.345	3170	10.1016/j.gloplacha.2012.05.012		www.ncdc.noaa.gov/paleo/study/13120		LakeSediment	d18O	calcite in bulk sediment	isotope				d18O	permil	abs	P-E	lake@surface		winter	winterOnly	negative	-56	8154.59	27.337	1.09615	0.53	TRUE	CR	Winter drought, but also winter/summer precipitation balance.	http://lipdverse.org/wNAm/0_15_0/YellowLake.Anderson.2012.html
893A.Kennet.2007	893A	Pacific Ocean>North Pacific Ocean	34.2875	-120.036	-588	10.1016/j.quascirev.2006.07.019		www.ncdc.noaa.gov/paleo/study/27330		MarineSediment							hole											26.704						http://lipdverse.org/wNAm/0_15_0/893A.Kennet.2007.html
893A.Kennet.2007	893A	Pacific Ocean>North Pacific Ocean	34.2875	-120.036	-588	10.1016/j.quascirev.2006.07.019		www.ncdc.noaa.gov/paleo/study/27330		MarineSediment							section											27.622						http://lipdverse.org/wNAm/0_15_0/893A.Kennet.2007.html
893A.Kennet.2007	893A	Pacific Ocean>North Pacific Ocean	34.2875	-120.036	-588	10.1016/j.quascirev.2006.07.019		www.ncdc.noaa.gov/paleo/study/27330		MarineSediment							interval											27.622						http://lipdverse.org/wNAm/0_15_0/893A.Kennet.2007.html
893A.Kennet.2007	893A	Pacific Ocean>North Pacific Ocean	34.2875	-120.036	-588	10.1016/j.quascirev.2006.07.019		www.ncdc.noaa.gov/paleo/study/27330		MarineSediment							radiocarbonDatesAD0x2FBC									532.495	532.495		Inf					http://lipdverse.org/wNAm/0_15_0/893A.Kennet.2007.html
893A.Kennet.2007	893A	Pacific Ocean>North Pacific Ocean	34.2875	-120.036	-588	10.1016/j.quascirev.2006.07.019		www.ncdc.noaa.gov/paleo/study/27330		MarineSediment							d18O				d18OPachySLCorr					62.788	10001.9	29.6	2.4147					http://lipdverse.org/wNAm/0_15_0/893A.Kennet.2007.html
893A.Kennet.2007	893A	Pacific Ocean>North Pacific Ocean	34.2875	-120.036	-588	10.1016/j.quascirev.2006.07.019		www.ncdc.noaa.gov/paleo/study/27330		MarineSediment							d18O				d18O0x28pachy0x29					62.788	10001.9	29.6	2.4147					http://lipdverse.org/wNAm/0_15_0/893A.Kennet.2007.html
893A.Kennet.2007	893A	Pacific Ocean>North Pacific Ocean	34.2875	-120.036	-588	10.1016/j.quascirev.2006.07.019		www.ncdc.noaa.gov/paleo/study/27330		MarineSediment							d18O				d18OBullSLCorr					8.97	10001.9	31.477	2.40169					http://lipdverse.org/wNAm/0_15_0/893A.Kennet.2007.html
893A.Kennet.2007	893A	Pacific Ocean>North Pacific Ocean	34.2875	-120.036	-588	10.1016/j.quascirev.2006.07.019		www.ncdc.noaa.gov/paleo/study/27330		MarineSediment							d18O				d18O0x28bull0x29					8.97	10001.9	31.477	2.40169					http://lipdverse.org/wNAm/0_15_0/893A.Kennet.2007.html
893A.Kennet.2007	893A	Pacific Ocean>North Pacific Ocean	34.2875	-120.036	-588	10.1016/j.quascirev.2006.07.019		www.ncdc.noaa.gov/paleo/study/27330		MarineSediment	d18O	bulloides	isotope	SST calculated after Bemis 1998			temperature	degC	abs	T	sea@surface		annual	annual	positive	8.97	10001.9	31.175	2.40169			PMS, AdV	seasonality not specified explicitly by author but infered from general discussion in text.	http://lipdverse.org/wNAm/0_15_0/893A.Kennet.2007.html
BanksIsland-12.Gajewski.2000	Banks Island -12	North America>Canada>Northwest Territories	72.37	-119.83	220	10.1139/b00-018	10.1038/nature25464	www.ncdc.noaa.gov/paleo/study/27330	10.21233/N37880	LakeSediment	pollen	assemblage	pollen	MAT			temperature	degC	abs	T	air@surface		annual	annual	positive	175	10183	302.5	0.29976			TB	fails age control, largest gap is 3920 yrs	http://lipdverse.org/wNAm/0_15_0/BanksIsland-12.Gajewski.2000.html
BanksIsland-12.Gajewski.2000	Banks Island -12	North America>Canada>Northwest Territories	72.37	-119.83	220	10.1139/b00-018	10.1038/nature25464	www.ncdc.noaa.gov/paleo/study/27330	10.21233/N37880	LakeSediment	pollen			MAT			precipitation	mm		P	@surface		annual	annual		175	10183	302.5	0.29976			JM		http://lipdverse.org/wNAm/0_15_0/BanksIsland-12.Gajewski.2000.html
BeaverLake.Schmieder.2011	Beaver Lake	North America>United States Of America>Nebraska	42.46	-100.67	905	10.1016/j.quascirev.2011.04.011		www.ncdc.noaa.gov/paleo/study/23075		LakeSediment	diatom						DI0x2Dlake0x2Ddepth	m		P-E			annual		positive	0	6449.64	28.667	1.55047					http://lipdverse.org/wNAm/0_15_0/BeaverLake.Schmieder.2011.html
BegbieLake.Brown.2019	Begbie Lake	North America>Canada>British Columbia	48.59	-123.68	188	10.1177/0959683619854523		wNAm		LakeSediment							DWHI	unitless								-64	11569	202	0.859623					http://lipdverse.org/wNAm/0_15_0/BegbieLake.Brown.2019.html
Big.Cumming.2002	Big Lake	North America>Canada>British Columbia	51.668	-121.45	1030	10.1073/pnas.252603099		www.ncdc.noaa.gov/paleo/study/23089		LakeSediment							sambleID	unitless										13.392						http://lipdverse.org/wNAm/0_15_0/Big.Cumming.2002.html
Big.Cumming.2002	Big Lake	North America>Canada>British Columbia	51.668	-121.45	1030	10.1073/pnas.252603099		www.ncdc.noaa.gov/paleo/study/23089		LakeSediment	diatom	assemblage				Mean_boot_salinity	salinity	unitless		P-E	salinity		annual	annual	negative	-41.58	5533	13.392	3.58771				duplicate salinity record	http://lipdverse.org/wNAm/0_15_0/Big.Cumming.2002.html
Big.Cumming.2002	Big Lake	North America>Canada>British Columbia	51.668	-121.45	1030	10.1073/pnas.252603099		www.ncdc.noaa.gov/paleo/study/23089		LakeSediment							numInZone	unitless								-41.58	5533	13.392	3.58771					http://lipdverse.org/wNAm/0_15_0/Big.Cumming.2002.html
BlueLake.Routson.2019	Blue Lake	North America>United States Of America>Colorado	37.24	-106.63	3500	10.1029/2019GL083255		www.ncdc.noaa.gov/paleo/study/27078		LakeSediment		mixing model					error	g/cm2/yr								-60.1151	4474.34	1.78457	3.08747					http://lipdverse.org/wNAm/0_15_0/BlueLake.Routson.2019.html
BoomerangLake.Brown.2006	Boomerang Lake	North America>Canada>British Columbia	49.18	-124.16	361	10.1016/j.quascirev.2006.02.020		wNAm		LakeSediment							DWHI	unitless								-45	11768	299	0.507915					http://lipdverse.org/wNAm/0_15_0/BoomerangLake.Brown.2006.html
BoomerangLake.Brown.2006	Boomerang Lake	North America>Canada>British Columbia	49.18	-124.16	361	10.1016/j.quascirev.2006.02.020		wNAm		LakeSediment	pollen						MAP	mm		M	precip@surface					-45	11768	299	0.507915					http://lipdverse.org/wNAm/0_15_0/BoomerangLake.Brown.2006.html
BoomerangLake.Brown.2006	Boomerang Lake	North America>Canada>British Columbia	49.18	-124.16	361	10.1016/j.quascirev.2006.02.020		wNAm		LakeSediment	pollen						precipitation	unitless		P	@surface		annual		positive	-45	11768	299	0.507915					http://lipdverse.org/wNAm/0_15_0/BoomerangLake.Brown.2006.html
CarletonLake.Upiter.2014	Carleton Lake	North America>Canada>Northwest Territories	64.2572	-110.101	420	10.1007/s10933-014-9775-5		www.ncdc.noaa.gov/paleo/study/16296		LakeSediment	chironomid			WA-PLS two-component model		Reconstruction based on Porinchu et al (2009) transfer function. This model had stronger analogues with the samples than the Barley et al (2006) transfer function model	temperature	degC		T			7		positive	-53.9	5964.2	100.4	0.996992					http://lipdverse.org/wNAm/0_15_0/CarletonLake.Upiter.2014.html
CarletonLake.Upiter.2014	Carleton Lake	North America>Canada>Northwest Territories	64.2572	-110.101	420	10.1007/s10933-014-9775-5		www.ncdc.noaa.gov/paleo/study/16296		LakeSediment	chironomid						uncertainty	degC								-53.9	5964.2	100.4	0.996992					http://lipdverse.org/wNAm/0_15_0/CarletonLake.Upiter.2014.html
CarletonLake.Upiter.2014	Carleton Lake	North America>Canada>Northwest Territories	64.2572	-110.101	420	10.1007/s10933-014-9775-5		www.ncdc.noaa.gov/paleo/study/16296		LakeSediment	chironomid						uncertainty	degC								-53.9	5964.2	100.4	0.996992					http://lipdverse.org/wNAm/0_15_0/CarletonLake.Upiter.2014.html
CarletonLake.Upiter.2014	Carleton Lake	North America>Canada>Northwest Territories	64.2572	-110.101	420	10.1007/s10933-014-9775-5		www.ncdc.noaa.gov/paleo/study/16296		LakeSediment	chironomid						reliable											100.4						http://lipdverse.org/wNAm/0_15_0/CarletonLake.Upiter.2014.html
CarletonLake.Upiter.2014	Carleton Lake	North America>Canada>Northwest Territories	64.2572	-110.101	420	10.1007/s10933-014-9775-5		www.ncdc.noaa.gov/paleo/study/16296		LakeSediment	chironomid			WA-PLS two-component model		Reconstruction based on Barley et al (2006) transfer function (oC). Weaker analogues in the downcore and training set chironomid communities and therefore in my opinion the reconstructed temperatures based on the Porinchu et al (2009) training set are likely more accurate.	temperature			T			7		positive	-53.9	5964.2	100.4	0.996992					http://lipdverse.org/wNAm/0_15_0/CarletonLake.Upiter.2014.html
CarletonLake.Upiter.2014	Carleton Lake	North America>Canada>Northwest Territories	64.2572	-110.101	420	10.1007/s10933-014-9775-5		www.ncdc.noaa.gov/paleo/study/16296		LakeSediment	chironomid						uncertainty	degC								-53.9	5964.2	100.4	0.996992					http://lipdverse.org/wNAm/0_15_0/CarletonLake.Upiter.2014.html
CarletonLake.Upiter.2014	Carleton Lake	North America>Canada>Northwest Territories	64.2572	-110.101	420	10.1007/s10933-014-9775-5		www.ncdc.noaa.gov/paleo/study/16296		LakeSediment	chironomid						uncertainty	degC								-53.9	5964.2	100.4	0.996992					http://lipdverse.org/wNAm/0_15_0/CarletonLake.Upiter.2014.html
CarletonLake.Upiter.2014	Carleton Lake	North America>Canada>Northwest Territories	64.2572	-110.101	420	10.1007/s10933-014-9775-5		www.ncdc.noaa.gov/paleo/study/16296		LakeSediment	chironomid						reliable											100.4						http://lipdverse.org/wNAm/0_15_0/CarletonLake.Upiter.2014.html
Castor.Nelson.2011	Castor Lake	North America>United States Of America>Washington	48.54	-119.56	594	10.1073/pnas.1009194108		www.ncdc.noaa.gov/paleo/study/10310		LakeSediment	reflectance						grayscale20lp_detrended	grayscale		P-E	eff@surface		annual	annual	negative	101	6000	1	2.20376					http://lipdverse.org/wNAm/0_15_0/Castor.Nelson.2011.html
Castor.Nelson.2011	Castor Lake	North America>United States Of America>Washington	48.54	-119.56	594	10.1073/pnas.1009194108		www.ncdc.noaa.gov/paleo/study/10310		LakeSediment	d13C						d13C	permil								-48	6029.01	4.88	2.13921					http://lipdverse.org/wNAm/0_15_0/Castor.Nelson.2011.html
Castor.Nelson.2011	Castor Lake	North America>United States Of America>Washington	48.54	-119.56	594	10.1073/pnas.1009194108		www.ncdc.noaa.gov/paleo/study/10310		LakeSediment	d18O						d18O	permil		M	eff@surface		annual	annual	negative	-48	5997	5	2.15054					http://lipdverse.org/wNAm/0_15_0/Castor.Nelson.2011.html
Castor.Nelson.2011	Castor Lake	North America>United States Of America>Washington	48.54	-119.56	594	10.1073/pnas.1009194108		www.ncdc.noaa.gov/paleo/study/10310		LakeSediment	d13C						d13C	permil								-48	5997	5	2.15054					http://lipdverse.org/wNAm/0_15_0/Castor.Nelson.2011.html
Chichancanab.Hodell.1995	Chichancanab Lake	North America>Mexico	19.8333	-88.75	3	10.1038/375391a0		www.ncdc.noaa.gov/paleo/study/5483		LakeSediment							d13C	permil								-9.738	8189.42	20.55	1.70749					http://lipdverse.org/wNAm/0_15_0/Chichancanab.Hodell.1995.html
Chichancanab.Hodell.1995	Chichancanab Lake	North America>Mexico	19.8333	-88.75	3	10.1038/375391a0		www.ncdc.noaa.gov/paleo/study/5483		LakeSediment							d18O	permil								-9.738	2188.82	16.631	6.36781					http://lipdverse.org/wNAm/0_15_0/Chichancanab.Hodell.1995.html
Chichancanab.Hodell.1995	Chichancanab Lake	North America>Mexico	19.8333	-88.75	3	10.1038/375391a0		www.ncdc.noaa.gov/paleo/study/5483		LakeSediment							d13C	permil								-9.738	2188.82	16.631	6.36781					http://lipdverse.org/wNAm/0_15_0/Chichancanab.Hodell.1995.html
Chichancanab.Hodell.1995	Chichancanab Lake	North America>Mexico	19.8333	-88.75	3	10.1038/375391a0		www.ncdc.noaa.gov/paleo/study/5483		LakeSediment	d18O						d18O	permil								7655.12	8189.42	20.55	26.2025					http://lipdverse.org/wNAm/0_15_0/Chichancanab.Hodell.1995.html
Chichancanab.Hodell.1995	Chichancanab Lake	North America>Mexico	19.8333	-88.75	3	10.1038/375391a0		www.ncdc.noaa.gov/paleo/study/5483		LakeSediment							d13C	permil								7655.12	8189.42	20.55	26.2025					http://lipdverse.org/wNAm/0_15_0/Chichancanab.Hodell.1995.html
Chichancanab.Hodell.1995	Chichancanab Lake	North America>Mexico	19.8333	-88.75	3	10.1038/375391a0		www.ncdc.noaa.gov/paleo/study/5483		LakeSediment							TotalAmmoniaBeccarii	unitless								7655.12	8189.42	20.55	26.2025					http://lipdverse.org/wNAm/0_15_0/Chichancanab.Hodell.1995.html
Chichancanab.Hodell.1995	Chichancanab Lake	North America>Mexico	19.8333	-88.75	3	10.1038/375391a0		www.ncdc.noaa.gov/paleo/study/5483		LakeSediment							d18OTerrestrialGastropods	permil								8617.44	10540.7	37.712	7.27911					http://lipdverse.org/wNAm/0_15_0/Chichancanab.Hodell.1995.html
Chichancanab.Hodell.1995	Chichancanab Lake	North America>Mexico	19.8333	-88.75	3	10.1038/375391a0		www.ncdc.noaa.gov/paleo/study/5483		LakeSediment							d13C	permil								8617.44	10540.7	37.712	7.27911					http://lipdverse.org/wNAm/0_15_0/Chichancanab.Hodell.1995.html
ChihuahuenosBog.Anderson.2008	Chihuahuenos Bog	North America>United States Of America>New Mexico	36.0475	-106.51	2925	10.1016/j.yqres.2007.12.002		wNAm		Peat	pollen						Picea	unitless								-46	17641	86	0.581106					http://lipdverse.org/wNAm/0_15_0/ChihuahuenosBog.Anderson.2008.html
ChihuahuenosBog.Anderson.2008	Chihuahuenos Bog	North America>United States Of America>New Mexico	36.0475	-106.51	2925	10.1016/j.yqres.2007.12.002		wNAm		Peat	pollen						PinusTotal	percent								-46	17641	86	0.581106					http://lipdverse.org/wNAm/0_15_0/ChihuahuenosBog.Anderson.2008.html
ChihuahuenosBog.Anderson.2008	Chihuahuenos Bog	North America>United States Of America>New Mexico	36.0475	-106.51	2925	10.1016/j.yqres.2007.12.002		wNAm		Peat	pollen						Artemesia	percent								-46	17641	86	0.581106					http://lipdverse.org/wNAm/0_15_0/ChihuahuenosBog.Anderson.2008.html
Chitina.Muhs.2013	Chitina loess section	North America>United States Of America>Alaska	61.54	-144.38	150	10.1016/j.aeolia.2013.06.001	10.5194/cp-11-869-2015	https://www.ncdc.noaa.gov/paleo/study/20529		loess							DMAR_error	g/m2/yr								1227	10786	374	2.51072			AC, DK	unclear climate interpretation	http://lipdverse.org/wNAm/0_15_0/Chitina.Muhs.2013.html
Craterlake.Arcusa.2020	Crater Lake	North America>United States Of America>Colorado	37.6743	-106.695	3338	10.1177/0959683619875192		wNAm		LakeSediment							dbd	g/cm3								94.2743	15754.3	157.524	0.923925					http://lipdverse.org/wNAm/0_15_0/Craterlake.Arcusa.2020.html
Craterlake.Arcusa.2020	Crater Lake	North America>United States Of America>Colorado	37.6743	-106.695	3338	10.1177/0959683619875192		wNAm		LakeSediment							mineral	fraction								94.2743	15754.3	157.524	0.923925					http://lipdverse.org/wNAm/0_15_0/Craterlake.Arcusa.2020.html
Craterlake.Arcusa.2020	Crater Lake	North America>United States Of America>Colorado	37.6743	-106.695	3338	10.1177/0959683619875192		wNAm		LakeSediment							0.025_quantile_dust_flux	g/cm2/yr								94.2743	15754.3	157.524	0.923925					http://lipdverse.org/wNAm/0_15_0/Craterlake.Arcusa.2020.html
Craterlake.Arcusa.2020	Crater Lake	North America>United States Of America>Colorado	37.6743	-106.695	3338	10.1177/0959683619875192		wNAm		LakeSediment							0.25_quantile_dust_flux	g/cm2/yr								94.2743	15754.3	157.524	0.923925					http://lipdverse.org/wNAm/0_15_0/Craterlake.Arcusa.2020.html
Craterlake.Arcusa.2020	Crater Lake	North America>United States Of America>Colorado	37.6743	-106.695	3338	10.1177/0959683619875192		wNAm		LakeSediment							0.75_quantile_dust_flux	g/cm2/yr								94.2743	15754.3	157.524	0.923925					http://lipdverse.org/wNAm/0_15_0/Craterlake.Arcusa.2020.html
Craterlake.Arcusa.2020	Crater Lake	North America>United States Of America>Colorado	37.6743	-106.695	3338	10.1177/0959683619875192		wNAm		LakeSediment							0.975_quantile_dust_flux	g/cm2/yr								94.2743	15754.3	157.524	0.923925					http://lipdverse.org/wNAm/0_15_0/Craterlake.Arcusa.2020.html
CreviceLake.Whitlock.2012	Crevice Lake	North America>United States Of America>Montana	45	-110.58	1713	10.1016/j.palaeo.2012.03.001		wNAm		LakeSediment							d13C	permil								42	9201	10	1.201					http://lipdverse.org/wNAm/0_15_0/CreviceLake.Whitlock.2012.html
CreviceLake.Whitlock.2012	Crevice Lake	North America>United States Of America>Montana	45	-110.58	1713	10.1016/j.palaeo.2012.03.001		wNAm		LakeSediment	TIC						TIC	percent								41.55	9403.79	10.27	1.17493					http://lipdverse.org/wNAm/0_15_0/CreviceLake.Whitlock.2012.html
CreviceLake.Whitlock.2012	Crevice Lake	North America>United States Of America>Montana	45	-110.58	1713	10.1016/j.palaeo.2012.03.001		wNAm		LakeSediment							TC	percent								41.55	9403.79	10.27	1.17493					http://lipdverse.org/wNAm/0_15_0/CreviceLake.Whitlock.2012.html
CreviceLake.Whitlock.2012	Crevice Lake	North America>United States Of America>Montana	45	-110.58	1713	10.1016/j.palaeo.2012.03.001		wNAm		LakeSediment	TOC						TOC	percent								41.55	9403.79	10.27	1.17493					http://lipdverse.org/wNAm/0_15_0/CreviceLake.Whitlock.2012.html
CumbresBog.Johnson.2013	Cumbres Bog	North America>United States Of America>Colorado	37.0216	-106.45	3055	10.1177/0959683613479682		wNAm		LakeSediment							depthByCore	cm										221.1						http://lipdverse.org/wNAm/0_15_0/CumbresBog.Johnson.2013.html
DempsterPeatland.Porter.2019	Dempster Highway Peatland	North America>Canada>Yukon Territory	65.21	-138.32	740	10.1038/s41467-019-09622-y		www.ncdc.noaa.gov/paleo/study/27330		Ice-other							d2H	permil								-63	13585	150	1.16057					http://lipdverse.org/wNAm/0_15_0/DempsterPeatland.Porter.2019.html
DempsterPeatland.Porter.2019	Dempster Highway Peatland	North America>Canada>Yukon Territory	65.21	-138.32	740	10.1038/s41467-019-09622-y		www.ncdc.noaa.gov/paleo/study/27330		Ice-other							d18O	permil								-63	13585	150	1.16057					http://lipdverse.org/wNAm/0_15_0/DempsterPeatland.Porter.2019.html
DempsterPeatland.Porter.2019	Dempster Highway Peatland	North America>Canada>Yukon Territory	65.21	-138.32	740	10.1038/s41467-019-09622-y		www.ncdc.noaa.gov/paleo/study/27330		Ice-other							d-excess	permil								-63	13585	150	1.16057					http://lipdverse.org/wNAm/0_15_0/DempsterPeatland.Porter.2019.html
DempsterPeatland.Porter.2019	Dempster Highway Peatland	North America>Canada>Yukon Territory	65.21	-138.32	740	10.1038/s41467-019-09622-y		www.ncdc.noaa.gov/paleo/study/27330		Ice-other							dD_swcorr	permil								-63	13585	150	1.16057					http://lipdverse.org/wNAm/0_15_0/DempsterPeatland.Porter.2019.html
DempsterPeatland.Porter.2019	Dempster Highway Peatland	North America>Canada>Yukon Territory	65.21	-138.32	740	10.1038/s41467-019-09622-y		www.ncdc.noaa.gov/paleo/study/27330		Ice-other	d18O						d18O_swcorr	permil								-63	13585	150	1.16057					http://lipdverse.org/wNAm/0_15_0/DempsterPeatland.Porter.2019.html
DempsterPeatland.Porter.2019	Dempster Highway Peatland	North America>Canada>Yukon Territory	65.21	-138.32	740	10.1038/s41467-019-09622-y		www.ncdc.noaa.gov/paleo/study/27330		Ice-other							d-excess_swcorr	permil								-63	13585	150	1.16057					http://lipdverse.org/wNAm/0_15_0/DempsterPeatland.Porter.2019.html
DempsterPeatland.Porter.2019	Dempster Highway Peatland	North America>Canada>Yukon Territory	65.21	-138.32	740	10.1038/s41467-019-09622-y		www.ncdc.noaa.gov/paleo/study/27330		Ice-other							deltaT - 1 sigma	degC								-63	13585	150	1.16057					http://lipdverse.org/wNAm/0_15_0/DempsterPeatland.Porter.2019.html
DempsterPeatland.Porter.2019	Dempster Highway Peatland	North America>Canada>Yukon Territory	65.21	-138.32	740	10.1038/s41467-019-09622-y		www.ncdc.noaa.gov/paleo/study/27330		Ice-other							deltaT + 1 sigma	degC								-63	13585	150	1.16057					http://lipdverse.org/wNAm/0_15_0/DempsterPeatland.Porter.2019.html
DJ6-93SF-6.McGann.2008	DJ6-93SF-6	Pacific Ocean>North Pacific Ocean	37.63	-122.37	-4	10.2112/08A-0003.1		wNAm		MarineSediment							depth.top	cm								20	3840	90	2.87958					http://lipdverse.org/wNAm/0_15_0/DJ6-93SF-6.McGann.2008.html
DJ6-93SF-6.McGann.2008	DJ6-93SF-6	Pacific Ocean>North Pacific Ocean	37.63	-122.37	-4	10.2112/08A-0003.1		wNAm		MarineSediment							depth_bot	cm								20	3840	90	2.87958					http://lipdverse.org/wNAm/0_15_0/DJ6-93SF-6.McGann.2008.html
DJ6-93SF-6.McGann.2008	DJ6-93SF-6	Pacific Ocean>North Pacific Ocean	37.63	-122.37	-4	10.2112/08A-0003.1		wNAm		MarineSediment	Mg/Ca						Mg/Ca	mm/m								20	3840	80	2.87958					http://lipdverse.org/wNAm/0_15_0/DJ6-93SF-6.McGann.2008.html
DJ6-93SF-6.McGann.2008	DJ6-93SF-6	Pacific Ocean>North Pacific Ocean	37.63	-122.37	-4	10.2112/08A-0003.1		wNAm		MarineSediment	d18O						d18O	permil								20	3840	90	2.87958					http://lipdverse.org/wNAm/0_15_0/DJ6-93SF-6.McGann.2008.html
DJ6-93SF-6.McGann.2008	DJ6-93SF-6	Pacific Ocean>North Pacific Ocean	37.63	-122.37	-4	10.2112/08A-0003.1		wNAm		MarineSediment	d18O						salinity	psu								20	3840	90	2.87958					http://lipdverse.org/wNAm/0_15_0/DJ6-93SF-6.McGann.2008.html
DSDP480.Barron.2004	DSDP site 480	Pacific Ocean>North Pacific Ocean	27.9	-111.65	-655	10.1016/S0377-8398(03)00071-9		www.ncdc.noaa.gov/paleo/study/5855		MarineSediment							CAL	unitless										43.86						http://lipdverse.org/wNAm/0_15_0/DSDP480.Barron.2004.html
DSDP480.Barron.2004	DSDP site 480	Pacific Ocean>North Pacific Ocean	27.9	-111.65	-655	10.1016/S0377-8398(03)00071-9		www.ncdc.noaa.gov/paleo/study/5855		MarineSediment							Actinocyclus_octonarius	percent								1330	15185.7	43.86	0.374883					http://lipdverse.org/wNAm/0_15_0/DSDP480.Barron.2004.html
DSDP480.Barron.2004	DSDP site 480	Pacific Ocean>North Pacific Ocean	27.9	-111.65	-655	10.1016/S0377-8398(03)00071-9		www.ncdc.noaa.gov/paleo/study/5855		MarineSediment							Actinoptychus_spp.	percent								1330	15185.7	43.86	0.374883					http://lipdverse.org/wNAm/0_15_0/DSDP480.Barron.2004.html
DSDP480.Barron.2004	DSDP site 480	Pacific Ocean>North Pacific Ocean	27.9	-111.65	-655	10.1016/S0377-8398(03)00071-9		www.ncdc.noaa.gov/paleo/study/5855		MarineSediment							Coscinodiscus_spp.	percent								1330	15185.7	43.86	0.374883					http://lipdverse.org/wNAm/0_15_0/DSDP480.Barron.2004.html
DSDP480.Barron.2004	DSDP site 480	Pacific Ocean>North Pacific Ocean	27.9	-111.65	-655	10.1016/S0377-8398(03)00071-9		www.ncdc.noaa.gov/paleo/study/5855		MarineSediment							Cyclotella_spp.	percent								1330	15185.7	43.86	0.374883					http://lipdverse.org/wNAm/0_15_0/DSDP480.Barron.2004.html
DSDP480.Barron.2004	DSDP site 480	Pacific Ocean>North Pacific Ocean	27.9	-111.65	-655	10.1016/S0377-8398(03)00071-9		www.ncdc.noaa.gov/paleo/study/5855		MarineSediment							Stephanopyxis_spp.	percent								1330	15185.7	43.86	0.374883					http://lipdverse.org/wNAm/0_15_0/DSDP480.Barron.2004.html
DSDP480.Barron.2004	DSDP site 480	Pacific Ocean>North Pacific Ocean	27.9	-111.65	-655	10.1016/S0377-8398(03)00071-9		www.ncdc.noaa.gov/paleo/study/5855		MarineSediment							Number_counted	percent								1330	15185.7	43.86	0.374883					http://lipdverse.org/wNAm/0_15_0/DSDP480.Barron.2004.html
DSDP480.Barron.2004	DSDP site 480	Pacific Ocean>North Pacific Ocean	27.9	-111.65	-655	10.1016/S0377-8398(03)00071-9		www.ncdc.noaa.gov/paleo/study/5855		MarineSediment							Dictyocha_acueata	percent								1510	15100	390	0.381316					http://lipdverse.org/wNAm/0_15_0/DSDP480.Barron.2004.html
DSDP480.Barron.2004	DSDP site 480	Pacific Ocean>North Pacific Ocean	27.9	-111.65	-655	10.1016/S0377-8398(03)00071-9		www.ncdc.noaa.gov/paleo/study/5855		MarineSediment							D_aff_D_aculeata	percent								1370	15060	80	0.376294					http://lipdverse.org/wNAm/0_15_0/DSDP480.Barron.2004.html
DSDP480.Barron.2004	DSDP site 480	Pacific Ocean>North Pacific Ocean	27.9	-111.65	-655	10.1016/S0377-8398(03)00071-9		www.ncdc.noaa.gov/paleo/study/5855		MarineSediment							D_aspinosa	percent								1420	14570	80	0.378072					http://lipdverse.org/wNAm/0_15_0/DSDP480.Barron.2004.html
DSDP480.Barron.2004	DSDP site 480	Pacific Ocean>North Pacific Ocean	27.9	-111.65	-655	10.1016/S0377-8398(03)00071-9		www.ncdc.noaa.gov/paleo/study/5855		MarineSediment	diatom	singel species				tropical	D_calida	percent								1370	14740	50	0.376294					http://lipdverse.org/wNAm/0_15_0/DSDP480.Barron.2004.html
DSDP480.Barron.2004	DSDP site 480	Pacific Ocean>North Pacific Ocean	27.9	-111.65	-655	10.1016/S0377-8398(03)00071-9		www.ncdc.noaa.gov/paleo/study/5855		MarineSediment	diatom	singel species				tropical	D_calida_ampliata	percent								1370	12350	85	0.376294					http://lipdverse.org/wNAm/0_15_0/DSDP480.Barron.2004.html
DSDP480.Barron.2004	DSDP site 480	Pacific Ocean>North Pacific Ocean	27.9	-111.65	-655	10.1016/S0377-8398(03)00071-9		www.ncdc.noaa.gov/paleo/study/5855		MarineSediment	diatom	singel species				tropical	D_perlaevis	percent								1370	15150	50	0.376294					http://lipdverse.org/wNAm/0_15_0/DSDP480.Barron.2004.html
DSDP480.Barron.2004	DSDP site 480	Pacific Ocean>North Pacific Ocean	27.9	-111.65	-655	10.1016/S0377-8398(03)00071-9		www.ncdc.noaa.gov/paleo/study/5855		MarineSediment						northern gulf	D_stapedia	percent								1370	15150	50	0.376294					http://lipdverse.org/wNAm/0_15_0/DSDP480.Barron.2004.html
DSDP480.Barron.2004	DSDP site 480	Pacific Ocean>North Pacific Ocean	27.9	-111.65	-655	10.1016/S0377-8398(03)00071-9		www.ncdc.noaa.gov/paleo/study/5855		MarineSediment						indicative of high productivity	O_pulchra_(med)	percent								1370	15100	50	0.376294					http://lipdverse.org/wNAm/0_15_0/DSDP480.Barron.2004.html
DSDP480.Barron.2004	DSDP site 480	Pacific Ocean>North Pacific Ocean	27.9	-111.65	-655	10.1016/S0377-8398(03)00071-9		www.ncdc.noaa.gov/paleo/study/5855		MarineSediment						indicative of high productivity	O_pulchra_(small)	percent								1370	15150	50	0.376294					http://lipdverse.org/wNAm/0_15_0/DSDP480.Barron.2004.html
DSDP480.Barron.2004	DSDP site 480	Pacific Ocean>North Pacific Ocean	27.9	-111.65	-655	10.1016/S0377-8398(03)00071-9		www.ncdc.noaa.gov/paleo/study/5855		MarineSediment						indicative of high productivity	O_pulchra_(thick)	percent								1420	15150	80	0.378072					http://lipdverse.org/wNAm/0_15_0/DSDP480.Barron.2004.html
DSDP480.Barron.2004	DSDP site 480	Pacific Ocean>North Pacific Ocean	27.9	-111.65	-655	10.1016/S0377-8398(03)00071-9		www.ncdc.noaa.gov/paleo/study/5855		MarineSediment						indicative of high productivity	Numbe_counted	number								1370	15150	50	0.376294					http://lipdverse.org/wNAm/0_15_0/DSDP480.Barron.2004.html
DSDP480.Barron.2004	DSDP site 480	Pacific Ocean>North Pacific Ocean	27.9	-111.65	-655	10.1016/S0377-8398(03)00071-9		www.ncdc.noaa.gov/paleo/study/5855		MarineSediment							CAL	unitless										87.7						http://lipdverse.org/wNAm/0_15_0/DSDP480.Barron.2004.html
DSDP480.Barron.2004	DSDP site 480	Pacific Ocean>North Pacific Ocean	27.9	-111.65	-655	10.1016/S0377-8398(03)00071-9		www.ncdc.noaa.gov/paleo/study/5855		MarineSediment						terriginous	Al	percent								1334.4	15190.2	87.7	0.375038					http://lipdverse.org/wNAm/0_15_0/DSDP480.Barron.2004.html
DSDP480.Barron.2004	DSDP site 480	Pacific Ocean>North Pacific Ocean	27.9	-111.65	-655	10.1016/S0377-8398(03)00071-9		www.ncdc.noaa.gov/paleo/study/5855		MarineSediment							Si	percent								1334.4	15190.2	87.7	0.375038					http://lipdverse.org/wNAm/0_15_0/DSDP480.Barron.2004.html
DSDP480.Barron.2004	DSDP site 480	Pacific Ocean>North Pacific Ocean	27.9	-111.65	-655	10.1016/S0377-8398(03)00071-9		www.ncdc.noaa.gov/paleo/study/5855		MarineSediment						terriginous	Fe	percent								1334.4	15190.2	87.7	0.375038					http://lipdverse.org/wNAm/0_15_0/DSDP480.Barron.2004.html
DSDP480.Barron.2004	DSDP site 480	Pacific Ocean>North Pacific Ocean	27.9	-111.65	-655	10.1016/S0377-8398(03)00071-9		www.ncdc.noaa.gov/paleo/study/5855		MarineSediment						terriginous	%Ti	percent								1334.4	15190.2	87.7	0.375038					http://lipdverse.org/wNAm/0_15_0/DSDP480.Barron.2004.html
DSDP480.Barron.2004	DSDP site 480	Pacific Ocean>North Pacific Ocean	27.9	-111.65	-655	10.1016/S0377-8398(03)00071-9		www.ncdc.noaa.gov/paleo/study/5855		MarineSediment							%Mg	percent								1334.4	15190.2	87.7	0.375038					http://lipdverse.org/wNAm/0_15_0/DSDP480.Barron.2004.html
DSDP480.Barron.2004	DSDP site 480	Pacific Ocean>North Pacific Ocean	27.9	-111.65	-655	10.1016/S0377-8398(03)00071-9		www.ncdc.noaa.gov/paleo/study/5855		MarineSediment							%K	percent								1334.4	15190.2	87.7	0.375038					http://lipdverse.org/wNAm/0_15_0/DSDP480.Barron.2004.html
DSDP480.Barron.2004	DSDP site 480	Pacific Ocean>North Pacific Ocean	27.9	-111.65	-655	10.1016/S0377-8398(03)00071-9		www.ncdc.noaa.gov/paleo/study/5855		MarineSediment							%P	percent								1334.4	15190.2	87.7	0.375038					http://lipdverse.org/wNAm/0_15_0/DSDP480.Barron.2004.html
DSDP480.Barron.2004	DSDP site 480	Pacific Ocean>North Pacific Ocean	27.9	-111.65	-655	10.1016/S0377-8398(03)00071-9		www.ncdc.noaa.gov/paleo/study/5855		MarineSediment							Ba (ppm)	ppm								1334.4	15190.2	87.7	0.375038					http://lipdverse.org/wNAm/0_15_0/DSDP480.Barron.2004.html
DSDP480.Barron.2004	DSDP site 480	Pacific Ocean>North Pacific Ocean	27.9	-111.65	-655	10.1016/S0377-8398(03)00071-9		www.ncdc.noaa.gov/paleo/study/5855		MarineSediment							Sr (ppm)	ppm								1334.4	15190.2	87.7	0.375038					http://lipdverse.org/wNAm/0_15_0/DSDP480.Barron.2004.html
DSDP480.Barron.2004	DSDP site 480	Pacific Ocean>North Pacific Ocean	27.9	-111.65	-655	10.1016/S0377-8398(03)00071-9		www.ncdc.noaa.gov/paleo/study/5855		MarineSediment							% Total C	percent								1334.4	15190.2	87.7	0.375038					http://lipdverse.org/wNAm/0_15_0/DSDP480.Barron.2004.html
DSDP480.Barron.2004	DSDP site 480	Pacific Ocean>North Pacific Ocean	27.9	-111.65	-655	10.1016/S0377-8398(03)00071-9		www.ncdc.noaa.gov/paleo/study/5855		MarineSediment							TIC	percent								1334.4	15190.2	87.7	0.375038					http://lipdverse.org/wNAm/0_15_0/DSDP480.Barron.2004.html
DSDP480.Barron.2004	DSDP site 480	Pacific Ocean>North Pacific Ocean	27.9	-111.65	-655	10.1016/S0377-8398(03)00071-9		www.ncdc.noaa.gov/paleo/study/5855		MarineSediment							TOC	percent								1334.4	15190.2	87.7	0.375038					http://lipdverse.org/wNAm/0_15_0/DSDP480.Barron.2004.html
Dune.Finney.2012	Dune Lake	North America>United States Of America>Alaska	64.42	-149.9	134	10.1007/s10933-012-9617-2		www.ncdc.noaa.gov/paleo/study/13076		LakeSediment							DUNE_A	unitless										16.513						http://lipdverse.org/wNAm/0_15_0/Dune.Finney.2012.html
Eleanor.Gavin.2011	Eleanor Lake	North America>United States Of America>Washington	47.68	-124.02	710	10.1016/j.quascirev.2011.03.003		www.ncdc.noaa.gov/paleo-search/study/23371		LakeSediment							LOI	percent								103.2	10836.8	122.55	1.21115					http://lipdverse.org/wNAm/0_15_0/Eleanor.Gavin.2011.html
Eleanor.Gavin.2011	Eleanor Lake	North America>United States Of America>Washington	47.68	-124.02	710	10.1016/j.quascirev.2011.03.003		www.ncdc.noaa.gov/paleo-search/study/23371		LakeSediment							quartz	percent								429.4	10524.3	272.5	1.28778					http://lipdverse.org/wNAm/0_15_0/Eleanor.Gavin.2011.html
Eleanor.Gavin.2011	Eleanor Lake	North America>United States Of America>Washington	47.68	-124.02	710	10.1016/j.quascirev.2011.03.003		www.ncdc.noaa.gov/paleo-search/study/23371		LakeSediment							feldspar	percent								429.4	10524.3	272.5	1.28778					http://lipdverse.org/wNAm/0_15_0/Eleanor.Gavin.2011.html
Eleanor.Gavin.2011	Eleanor Lake	North America>United States Of America>Washington	47.68	-124.02	710	10.1016/j.quascirev.2011.03.003		www.ncdc.noaa.gov/paleo-search/study/23371		LakeSediment							pyrite	percent								429.4	10524.3	272.5	1.28778					http://lipdverse.org/wNAm/0_15_0/Eleanor.Gavin.2011.html
Elsinore.Kirby.2019	Lake Elsinore	North America>United States Of America>California	33.6733	-117.354	379	10.3389/feart.2019.00074		www.ncdc.noaa.gov/paleo/study/30232		LakeSediment	d13C						d13C	permil								-43.7	10895	14.6	2.37688					http://lipdverse.org/wNAm/0_15_0/Elsinore.Kirby.2019.html
Emerald.Shuman.2014	Emerald Lake	North America>United States Of America>Colorado	39.152	-106.406	3053	10.2113/gsrocky.49.1.33		www.ncdc.noaa.gov/paleo/study/23079		LakeSediment	stratigraphy					Elevation below modern, upper bound	lakeLevelHi	cm			eff		annual	annual	negative	250	11900	50	2.14592					http://lipdverse.org/wNAm/0_15_0/Emerald.Shuman.2014.html
Emerald.Shuman.2014	Emerald Lake	North America>United States Of America>Colorado	39.152	-106.406	3053	10.2113/gsrocky.49.1.33		www.ncdc.noaa.gov/paleo/study/23079		LakeSediment	stratigraphy					Elevation below modern, lower bound	lakeLevelLo	cm			eff		annual	annual	negative	250	11900	50	2.14592					http://lipdverse.org/wNAm/0_15_0/Emerald.Shuman.2014.html
EN32_PC6.Flower.2004	EN32_PC6	Atlantic Ocean>North Atlantic Ocean>Gulf Of Mexico	26.946	-91.35	-2280	10.1130/G20604.1	www.geosociety.org/datarepository/2004/2004095.pdf	www.ncdc.noaa.gov/paleo/study/27330		MarineSediment							d18o_ruber	per mil vs VPDB								8330	22210	290	1.3624					http://lipdverse.org/wNAm/0_15_0/EN32_PC6.Flower.2004.html
EN32_PC6.Flower.2004	EN32_PC6	Atlantic Ocean>North Atlantic Ocean>Gulf Of Mexico	26.946	-91.35	-2280	10.1130/G20604.1	www.geosociety.org/datarepository/2004/2004095.pdf	www.ncdc.noaa.gov/paleo/study/27330		MarineSediment							mgca_ruber	mmol/mol								8330	22210	300	1.3624					http://lipdverse.org/wNAm/0_15_0/EN32_PC6.Flower.2004.html
EnosLake.Brown.2006	Enos Lake	North America>Canada>British Columbia	49.28	-124.15	46	10.1016/j.quascirev.2006.02.020		wNAm		LakeSediment							DWHI	unitless								-45	10473	152	0.760601					http://lipdverse.org/wNAm/0_15_0/EnosLake.Brown.2006.html
EnosLake.Brown.2006	Enos Lake	North America>Canada>British Columbia	49.28	-124.15	46	10.1016/j.quascirev.2006.02.020		wNAm		LakeSediment							MAP	mm								-45	10473	152	0.760601					http://lipdverse.org/wNAm/0_15_0/EnosLake.Brown.2006.html
EW0408_66JC.Praetorius.2015	EW0408_66JC	((( null ))) Pacific Ocean>North Pacific Ocean /// Pacific Ocean>North Pacific Ocean>Gulf Of Alaska	57.8724	-137.105	-426	10.1038/nature15753		www.ncdc.noaa.gov/paleo/study/22400		MarineSediment							d18o_pachyderma	permil vs VPDB								4246	13570	14	2.57931					http://lipdverse.org/wNAm/0_15_0/EW0408_66JC.Praetorius.2015.html
EW0408_66JC.Praetorius.2015	EW0408_66JC	((( null ))) Pacific Ocean>North Pacific Ocean /// Pacific Ocean>North Pacific Ocean>Gulf Of Alaska	57.8724	-137.105	-426	10.1038/nature15753		www.ncdc.noaa.gov/paleo/study/22400		MarineSediment							Uk37	unitless								4380.62	13573.8	120	2.62489					http://lipdverse.org/wNAm/0_15_0/EW0408_66JC.Praetorius.2015.html
EW0408_85JC.Praetorius.2015	EW0408_85JC	Pacific Ocean>North Pacific Ocean>Gulf Of Alaska	59.5554	-144.154	-682	10.1038/nature15753	10.1016/j.epsl.2014.04.004	www.ncdc.noaa.gov/paleo/study/21950		MarineSediment							Uk37	unitless								1039	17390	149	1.82465					http://lipdverse.org/wNAm/0_15_0/EW0408_85JC.Praetorius.2015.html
EW0408_85JC.Praetorius.2015	EW0408_85JC	Pacific Ocean>North Pacific Ocean>Gulf Of Alaska	59.5554	-144.154	-682	10.1038/nature15753	10.1016/j.epsl.2014.04.004	www.ncdc.noaa.gov/paleo/study/21950		MarineSediment							d18o_pachyderma	permil vs VPDB								993.737	17370	75.041	1.81715					http://lipdverse.org/wNAm/0_15_0/EW0408_85JC.Praetorius.2015.html
EW0408_85JC.Praetorius.2015	EW0408_85JC	Pacific Ocean>North Pacific Ocean>Gulf Of Alaska	59.5554	-144.154	-682	10.1038/nature15753	10.1016/j.epsl.2014.04.004	www.ncdc.noaa.gov/paleo/study/21950		MarineSediment							d18o_bulloides	permil vs VPDB								993.737	17261	75.041	1.81715					http://lipdverse.org/wNAm/0_15_0/EW0408_85JC.Praetorius.2015.html
EW0408-87JC.Praetorius.2020	EW0408-87JC	Pacific Ocean>North Pacific Ocean>Gulf Of Alaska	58.77	-144.5	3680	10.1126/sciadv.aay2915		wNAm		MarineSediment							depth_range	unitless										443.84						http://lipdverse.org/wNAm/0_15_0/EW0408-87JC.Praetorius.2020.html
EW0408-87JC.Praetorius.2020	EW0408-87JC	Pacific Ocean>North Pacific Ocean>Gulf Of Alaska	58.77	-144.5	3680	10.1126/sciadv.aay2915		wNAm		MarineSediment							Uk37	unitless								9.74359	17771.3	443.84	0.583807					http://lipdverse.org/wNAm/0_15_0/EW0408-87JC.Praetorius.2020.html
EW0408-87JC.Praetorius.2020	EW0408-87JC	Pacific Ocean>North Pacific Ocean>Gulf Of Alaska	58.77	-144.5	3680	10.1126/sciadv.aay2915		wNAm		MarineSediment							UK_error	unitless								9.74359	17771.3	443.84	0.583807					http://lipdverse.org/wNAm/0_15_0/EW0408-87JC.Praetorius.2020.html
EW0408-87JC.Praetorius.2020	EW0408-87JC	Pacific Ocean>North Pacific Ocean>Gulf Of Alaska	58.77	-144.5	3680	10.1126/sciadv.aay2915		wNAm		MarineSediment	alkenone						temperature_error	unitless								9.74359	17771.3	443.84	0.583807					http://lipdverse.org/wNAm/0_15_0/EW0408-87JC.Praetorius.2020.html
EW0408-87JC.Praetorius.2020	EW0408-87JC	Pacific Ocean>North Pacific Ocean>Gulf Of Alaska	58.77	-144.5	3680	10.1126/sciadv.aay2915		wNAm		MarineSediment							K37	ug/g								9.74359	17771.3	443.84	0.583807					http://lipdverse.org/wNAm/0_15_0/EW0408-87JC.Praetorius.2020.html
FoyLake.Stone.2008	FoyLake	North America>United States Of America>Montana	48.2	-114.4	1006	10.1130/G22225.1		www.ncdc.noaa.gov/paleo/study/6188	41761	LakeSediment		euplankton					euplank	unitless								1912.5	15095.1	6	0.892193					http://lipdverse.org/wNAm/0_15_0/FoyLake.Stone.2008.html
FoyLake.Stone.2008	FoyLake	North America>United States Of America>Montana	48.2	-114.4	1006	10.1130/G22225.1		www.ncdc.noaa.gov/paleo/study/6188	41761	LakeSediment		tychoplankton					tycho	unitless								1912.5	15095.1	6	0.892193					http://lipdverse.org/wNAm/0_15_0/FoyLake.Stone.2008.html
FoyLake.Stone.2008	FoyLake	North America>United States Of America>Montana	48.2	-114.4	1006	10.1130/G22225.1		www.ncdc.noaa.gov/paleo/study/6188	41761	LakeSediment							x_C	unitless								1916	3516	12	5.625					http://lipdverse.org/wNAm/0_15_0/FoyLake.Stone.2008.html
FoyLake.Stone.2008	FoyLake	North America>United States Of America>Montana	48.2	-114.4	1006	10.1130/G22225.1		www.ncdc.noaa.gov/paleo/study/6188	41761	LakeSediment							N	unitless								1916	3516	12	5.625					http://lipdverse.org/wNAm/0_15_0/FoyLake.Stone.2008.html
FoyLake.Stone.2008	FoyLake	North America>United States Of America>Montana	48.2	-114.4	1006	10.1130/G22225.1		www.ncdc.noaa.gov/paleo/study/6188	41761	LakeSediment							C/N	unitless								1916	3516	12	5.625					http://lipdverse.org/wNAm/0_15_0/FoyLake.Stone.2008.html
FoyLake.Stone.2008	FoyLake	North America>United States Of America>Montana	48.2	-114.4	1006	10.1130/G22225.1		www.ncdc.noaa.gov/paleo/study/6188	41761	LakeSediment							x18O	unitless								1912.5	5061.94	6	2.85765					http://lipdverse.org/wNAm/0_15_0/FoyLake.Stone.2008.html
FoyLake.Stone.2008	FoyLake	North America>United States Of America>Montana	48.2	-114.4	1006	10.1130/G22225.1		www.ncdc.noaa.gov/paleo/study/6188	41761	LakeSediment							d13C	unitless								1912.5	4123	6	4.07148					http://lipdverse.org/wNAm/0_15_0/FoyLake.Stone.2008.html
GGC19.Farmer.2011	GGC19	Arctic Ocean	72.16	-155.51	-369	10.1029/2011GL049714	10.5194/cp-10-1605-2014	www.ncdc.noaa.gov/paleo/study/15444		MarineSediment							d18O	permil								52	6660	64	1.36199					http://lipdverse.org/wNAm/0_15_0/GGC19.Farmer.2011.html
GGC19.Farmer.2011	GGC19	Arctic Ocean	72.16	-155.51	-369	10.1029/2011GL049714	10.5194/cp-10-1605-2014	www.ncdc.noaa.gov/paleo/study/15444		MarineSediment							temperature	degC		T	SBT		annual	annual		52	6660	64	1.36199					http://lipdverse.org/wNAm/0_15_0/GGC19.Farmer.2011.html
GGC19.Farmer.2011	GGC19	Arctic Ocean	72.16	-155.51	-369	10.1029/2011GL049714	10.5194/cp-10-1605-2014	www.ncdc.noaa.gov/paleo/study/15444		MarineSediment							d18O	permil								275	6660	64	1.40955					http://lipdverse.org/wNAm/0_15_0/GGC19.Farmer.2011.html
GGC19.Farmer.2011	GGC19	Arctic Ocean	72.16	-155.51	-369	10.1029/2011GL049714	10.5194/cp-10-1605-2014	www.ncdc.noaa.gov/paleo/study/15444		MarineSediment							SBT	degC		T	SBT		annual	annual		275	6660	64	1.40955					http://lipdverse.org/wNAm/0_15_0/GGC19.Farmer.2011.html
GGC19.Farmer.2011	GGC19	Arctic Ocean	72.16	-155.51	-369	10.1029/2011GL049714	10.5194/cp-10-1605-2014	www.ncdc.noaa.gov/paleo/study/15444		MarineSediment							Sea_Ice_months	months/year		ICE	sea@surface					69	6583	129	1.38164					http://lipdverse.org/wNAm/0_15_0/GGC19.Farmer.2011.html
GGC19.Farmer.2011	GGC19	Arctic Ocean	72.16	-155.51	-369	10.1029/2011GL049714	10.5194/cp-10-1605-2014	www.ncdc.noaa.gov/paleo/study/15444		MarineSediment							salinity	psu		S	SSS		Summer			415.43	6511.9	134	1.47626					http://lipdverse.org/wNAm/0_15_0/GGC19.Farmer.2011.html
GGC19.Farmer.2011	GGC19	Arctic Ocean	72.16	-155.51	-369	10.1029/2011GL049714	10.5194/cp-10-1605-2014	www.ncdc.noaa.gov/paleo/study/15444		MarineSediment	dinocyst						Sea_Ice_conc	0-10		ICE	sea@surface		annual	annual	positive	415.43	6511.9	134	1.47626					http://lipdverse.org/wNAm/0_15_0/GGC19.Farmer.2011.html
GGC19.Farmer.2011	GGC19	Arctic Ocean	72.16	-155.51	-369	10.1029/2011GL049714	10.5194/cp-10-1605-2014	www.ncdc.noaa.gov/paleo/study/15444		MarineSediment							productivity	gcm2								415.43	6511.9	134	1.47626					http://lipdverse.org/wNAm/0_15_0/GGC19.Farmer.2011.html
GGC55_JPC56.Barron.2005	GGC55_JPC56	Pacific Ocean>North Pacific Ocean	27.47	-112.1	-820	10.1016/j.marmicro.2005.04.001		www.ncdc.noaa.gov/paleo/study/5915		MarineSediment							Cal	unitless										102.3						http://lipdverse.org/wNAm/0_15_0/GGC55_JPC56.Barron.2005.html
GGC55_JPC56.Barron.2005	GGC55_JPC56	Pacific Ocean>North Pacific Ocean	27.47	-112.1	-820	10.1016/j.marmicro.2005.04.001		www.ncdc.noaa.gov/paleo/study/5915		MarineSediment							sedRate	cm/kyr								2190.5	15360	102.3	0.917478					http://lipdverse.org/wNAm/0_15_0/GGC55_JPC56.Barron.2005.html
GGC55_JPC56.Barron.2005	GGC55_JPC56	Pacific Ocean>North Pacific Ocean	27.47	-112.1	-820	10.1016/j.marmicro.2005.04.001		www.ncdc.noaa.gov/paleo/study/5915		MarineSediment	diatom						A_octonarius	percent								2190.5	15360	102.3	0.917478					http://lipdverse.org/wNAm/0_15_0/GGC55_JPC56.Barron.2005.html
GGC55_JPC56.Barron.2005	GGC55_JPC56	Pacific Ocean>North Pacific Ocean	27.47	-112.1	-820	10.1016/j.marmicro.2005.04.001		www.ncdc.noaa.gov/paleo/study/5915		MarineSediment	diatom						Actinoptychus_and_Paralia	percent								2190.5	15360	102.3	0.917478					http://lipdverse.org/wNAm/0_15_0/GGC55_JPC56.Barron.2005.html
GGC55_JPC56.Barron.2005	GGC55_JPC56	Pacific Ocean>North Pacific Ocean	27.47	-112.1	-820	10.1016/j.marmicro.2005.04.001		www.ncdc.noaa.gov/paleo/study/5915		MarineSediment	diatom						Azpeitia_nodulifer	percent								2190.5	15360	102.3	0.917478					http://lipdverse.org/wNAm/0_15_0/GGC55_JPC56.Barron.2005.html
GGC55_JPC56.Barron.2005	GGC55_JPC56	Pacific Ocean>North Pacific Ocean	27.47	-112.1	-820	10.1016/j.marmicro.2005.04.001		www.ncdc.noaa.gov/paleo/study/5915		MarineSediment	diatom						Roperia_tesselata	percent								2190.5	15360	102.3	0.917478					http://lipdverse.org/wNAm/0_15_0/GGC55_JPC56.Barron.2005.html
GGC55_JPC56.Barron.2005	GGC55_JPC56	Pacific Ocean>North Pacific Ocean	27.47	-112.1	-820	10.1016/j.marmicro.2005.04.001		www.ncdc.noaa.gov/paleo/study/5915		MarineSediment	diatom						Coscinodiscus_radiatus	percent								2190.5	15360	102.3	0.917478					http://lipdverse.org/wNAm/0_15_0/GGC55_JPC56.Barron.2005.html
GGC55_JPC56.Barron.2005	GGC55_JPC56	Pacific Ocean>North Pacific Ocean	27.47	-112.1	-820	10.1016/j.marmicro.2005.04.001		www.ncdc.noaa.gov/paleo/study/5915		MarineSediment	diatom						Coscinodiscus_large	percent								2190.5	15360	102.3	0.917478					http://lipdverse.org/wNAm/0_15_0/GGC55_JPC56.Barron.2005.html
GGC55_JPC56.Barron.2005	GGC55_JPC56	Pacific Ocean>North Pacific Ocean	27.47	-112.1	-820	10.1016/j.marmicro.2005.04.001		www.ncdc.noaa.gov/paleo/study/5915		MarineSediment	diatom						Cyclotella_spp	percent								2190.5	15360	102.3	0.917478					http://lipdverse.org/wNAm/0_15_0/GGC55_JPC56.Barron.2005.html
GGC55_JPC56.Barron.2005	GGC55_JPC56	Pacific Ocean>North Pacific Ocean	27.47	-112.1	-820	10.1016/j.marmicro.2005.04.001		www.ncdc.noaa.gov/paleo/study/5915		MarineSediment	diatom						Stephanopyxis	percent								2190.5	15360	102.3	0.917478					http://lipdverse.org/wNAm/0_15_0/GGC55_JPC56.Barron.2005.html
GGC55_JPC56.Barron.2005	GGC55_JPC56	Pacific Ocean>North Pacific Ocean	27.47	-112.1	-820	10.1016/j.marmicro.2005.04.001		www.ncdc.noaa.gov/paleo/study/5915		MarineSediment	diatom						total_xount	count								2190.5	15360	102.3	0.917478					http://lipdverse.org/wNAm/0_15_0/GGC55_JPC56.Barron.2005.html
GreatBasin.Salzer.2014	Great Basin	North America>United States Of America>Nevada	38	-116.5	0	10.1007/s00382-013-1911-9		www.ncdc.noaa.gov/paleo/study/17056		Wood							JAS+	degC								-56	4524	1						http://lipdverse.org/wNAm/0_15_0/GreatBasin.Salzer.2014.html
GreatBasin.Salzer.2014	Great Basin	North America>United States Of America>Nevada	38	-116.5	0	10.1007/s00382-013-1911-9		www.ncdc.noaa.gov/paleo/study/17056		Wood							JAS-	degC								-56	4524	1						http://lipdverse.org/wNAm/0_15_0/GreatBasin.Salzer.2014.html
Grutas.Winter.2020	Grutas del Ray Marcos	North America>Central America>Guatemala	15.4277	-90.2807	1466	10.1038/s41467-020-14490-y		www.ncdc.noaa.gov/paleo/study/28351		Speleothem	d13C						d13Ccarb	permil								342	12783	13	1.80134					http://lipdverse.org/wNAm/0_15_0/Grutas.Winter.2020.html
Grutas.Winter.2020	Grutas del Ray Marcos	North America>Central America>Guatemala	15.4277	-90.2807	1466	10.1038/s41467-020-14490-y		www.ncdc.noaa.gov/paleo/study/28351		Speleothem	d13C						d13CMean	permil								342	12783	13	1.80134					http://lipdverse.org/wNAm/0_15_0/Grutas.Winter.2020.html
Grutas.Winter.2020	Grutas del Ray Marcos	North America>Central America>Guatemala	15.4277	-90.2807	1466	10.1038/s41467-020-14490-y		www.ncdc.noaa.gov/paleo/study/28351		Speleothem							d13C_2.5	permil								342	12783	13	1.80134					http://lipdverse.org/wNAm/0_15_0/Grutas.Winter.2020.html
Grutas.Winter.2020	Grutas del Ray Marcos	North America>Central America>Guatemala	15.4277	-90.2807	1466	10.1038/s41467-020-14490-y		www.ncdc.noaa.gov/paleo/study/28351		Speleothem							d13C_97.5	permil								342	12783	13	1.80134					http://lipdverse.org/wNAm/0_15_0/Grutas.Winter.2020.html
Grutas.Winter.2020	Grutas del Ray Marcos	North America>Central America>Guatemala	15.4277	-90.2807	1466	10.1038/s41467-020-14490-y		www.ncdc.noaa.gov/paleo/study/28351		Speleothem	d18O						d18Omean	unitless								343	12778	13	1.80149					http://lipdverse.org/wNAm/0_15_0/Grutas.Winter.2020.html
Grutas.Winter.2020	Grutas del Ray Marcos	North America>Central America>Guatemala	15.4277	-90.2807	1466	10.1038/s41467-020-14490-y		www.ncdc.noaa.gov/paleo/study/28351		Speleothem							d18O_2.5	permil								343	12778	13	1.80149					http://lipdverse.org/wNAm/0_15_0/Grutas.Winter.2020.html
Grutas.Winter.2020	Grutas del Ray Marcos	North America>Central America>Guatemala	15.4277	-90.2807	1466	10.1038/s41467-020-14490-y		www.ncdc.noaa.gov/paleo/study/28351		Speleothem							d18O_97.5	permil								343	12778	13	1.80149					http://lipdverse.org/wNAm/0_15_0/Grutas.Winter.2020.html
Hallet.McKay.2009	Hallet Lake	North America>United States Of America>Alaska	61.4919	-146.239	1128	10.1007/s10933-008-9260-0	10.5194/cp-10-1605-2014	www.ncdc.noaa.gov/paleo/study/15444		LakeSediment	BSi						BSi			T+ELA	air@surface		Summer			17.501	8177.5	32	1.34804					http://lipdverse.org/wNAm/0_15_0/Hallet.McKay.2009.html
Hallet.McKay.2009	Hallet Lake	North America>United States Of America>Alaska	61.4919	-146.239	1128	10.1007/s10933-008-9260-0	10.5194/cp-10-1605-2014	www.ncdc.noaa.gov/paleo/study/15444		LakeSediment							BSi	mg g-1								-55.103	8193.5	11.7235	1.33356					http://lipdverse.org/wNAm/0_15_0/Hallet.McKay.2009.html
Hallet.McKay.2009	Hallet Lake	North America>United States Of America>Alaska	61.4919	-146.239	1128	10.1007/s10933-008-9260-0	10.5194/cp-10-1605-2014	www.ncdc.noaa.gov/paleo/study/15444		LakeSediment							BSi			T+ELA	air@surface		Summer			17.501	8177.5	32	1.34804					http://lipdverse.org/wNAm/0_15_0/Hallet.McKay.2009.html
Hanging.Cwynar.1982	Hanging Lake	North America>Canada>Yukon Territory	68.38	-138.38	500	10.2307/2937342	10.1038/nature25464	www.ncdc.noaa.gov/paleo/study/27330	10.21233/N35S6S	LakeSediment	pollen			MAT			precipitation	mm		P	@surface		annual	annual		0	10279.7	260	2.04286			JM		http://lipdverse.org/wNAm/0_15_0/Hanging.Cwynar.1982.html
Harding.Finkenbinder.2014	Harding Lake	North America>United States Of America>Alaska	64.42	-146.85	217	10.1016/j.quascirev.2014.01.005		www.ncdc.noaa.gov/paleo/study/15655		LakeSediment							DBD	unitless								-56	31639	48	0.0829463					http://lipdverse.org/wNAm/0_15_0/Harding.Finkenbinder.2014.html
HealLake.Brown.2006	Heal Lake	North America>Canada>British Columbia	48.54	-123.46	137	10.1016/j.quascirev.2006.02.020		wNAm		LakeSediment							DWHI	unitless								-42	11668	187	0.683177					http://lipdverse.org/wNAm/0_15_0/HealLake.Brown.2006.html
HealLake.Brown.2006	Heal Lake	North America>Canada>British Columbia	48.54	-123.46	137	10.1016/j.quascirev.2006.02.020		wNAm		LakeSediment							MAP	mm								-42	11668	187	0.683177					http://lipdverse.org/wNAm/0_15_0/HealLake.Brown.2006.html
HiddenLakeCA.Potito.2006	Hidden Lake CA	North America>United States Of America>California	38.2613	-119.537	2379	10.1016/j.yqres.2006.05.005		www.ncdc.noaa.gov/paleo/study/27330		LakeSediment	chironomid						uncertainty	unitless								15.6	15314.1	244.595	0.584093					http://lipdverse.org/wNAm/0_15_0/HiddenLakeCA.Potito.2006.html
HiddenLakeCA.Potito.2006	Hidden Lake CA	North America>United States Of America>California	38.2613	-119.537	2379	10.1016/j.yqres.2006.05.005		www.ncdc.noaa.gov/paleo/study/27330		LakeSediment	chironomid						uncertainty	unitless								15.6	15314.1	244.595	0.584093					http://lipdverse.org/wNAm/0_15_0/HiddenLakeCA.Potito.2006.html
HiddenLakeCA.Potito.2006	Hidden Lake CA	North America>United States Of America>California	38.2613	-119.537	2379	10.1016/j.yqres.2006.05.005		www.ncdc.noaa.gov/paleo/study/27330		LakeSediment	chironomid						reliable	unitless										244.595						http://lipdverse.org/wNAm/0_15_0/HiddenLakeCA.Potito.2006.html
HiddenLakeCO.Shuman.2009	Hidden Lake CO	North America>United States Of America>Colorado	40.505	-106.607	2708	10.1016/j.quascirev.2009.03.003		www.ncdc.noaa.gov/paleo/study/23077		LakeSediment	stratigraphy					Elevation below modern, upper bound	lakeLevelHi	cm			eff		annual	annual	negative	50	7900	50	0.89172					http://lipdverse.org/wNAm/0_15_0/HiddenLakeCO.Shuman.2009.html
HiddenLakeCO.Shuman.2009	Hidden Lake CO	North America>United States Of America>Colorado	40.505	-106.607	2708	10.1016/j.quascirev.2009.03.003		www.ncdc.noaa.gov/paleo/study/23077		LakeSediment	stratigraphy					Elevation below modern, lower bound	lakeLevelLo	cm			eff		annual	annual	negative	50	7900	50	0.89172					http://lipdverse.org/wNAm/0_15_0/HiddenLakeCO.Shuman.2009.html
HLY0501.deVernal.2013	HLY0501	Arctic Ocean	72.6947	-157.52	-415	10.1016/j.quascirev.2013.07.006	10.5194/cp-10-1605-2014	www.ncdc.noaa.gov/paleo/study/15444		MarineSediment							salinity	psu		S	SSS		Summer			225.35	8209.4	90.5	0.751498					http://lipdverse.org/wNAm/0_15_0/HLY0501.deVernal.2013.html
HLY0501.deVernal.2013	HLY0501	Arctic Ocean	72.6947	-157.52	-415	10.1016/j.quascirev.2013.07.006	10.5194/cp-10-1605-2014	www.ncdc.noaa.gov/paleo/study/15444		MarineSediment							Sea_Ice_conc	0-10		ICE	sea@surface		annual	annual	positive	225.35	8209.4	90.5	0.751498					http://lipdverse.org/wNAm/0_15_0/HLY0501.deVernal.2013.html
HLY0501.deVernal.2013	HLY0501	Arctic Ocean	72.6947	-157.52	-415	10.1016/j.quascirev.2013.07.006	10.5194/cp-10-1605-2014	www.ncdc.noaa.gov/paleo/study/15444		MarineSediment							productivity	gcm2								225.35	8209.4	90.5	0.751498					http://lipdverse.org/wNAm/0_15_0/HLY0501.deVernal.2013.html
HLY0501.deVernal.2013	HLY0501	Arctic Ocean	72.6947	-157.52	-415	10.1016/j.quascirev.2013.07.006	10.5194/cp-10-1605-2014	www.ncdc.noaa.gov/paleo/study/15444		MarineSediment							C									225.35	8209.4	103.49	0.751498					http://lipdverse.org/wNAm/0_15_0/HLY0501.deVernal.2013.html
HuntersLake.Anderson.2008	Hunters Lake	North America>United States Of America>Colorado	37.611	-106.844	3476	10.1071/WF07028		wNAm	20304	LakeSediment							pollenSum	unitless								-46	13940	357	0.415076					http://lipdverse.org/wNAm/0_15_0/HuntersLake.Anderson.2008.html
HuntersLake.Anderson.2008	Hunters Lake	North America>United States Of America>Colorado	37.611	-106.844	3476	10.1071/WF07028		wNAm	20304	LakeSediment	pollen		pollen				Picea	percent								-46	13940	357	0.415076					http://lipdverse.org/wNAm/0_15_0/HuntersLake.Anderson.2008.html
HuntersLake.Anderson.2008	Hunters Lake	North America>United States Of America>Colorado	37.611	-106.844	3476	10.1071/WF07028		wNAm	20304	LakeSediment	pollen		pollen				PinusTotal	percent								-46	13940	357	0.415076					http://lipdverse.org/wNAm/0_15_0/HuntersLake.Anderson.2008.html
HuntersLake.Anderson.2008	Hunters Lake	North America>United States Of America>Colorado	37.611	-106.844	3476	10.1071/WF07028		wNAm	20304	LakeSediment	pollen		pollen				Artemisia	percent								-46	13940	357	0.415076					http://lipdverse.org/wNAm/0_15_0/HuntersLake.Anderson.2008.html
Jenny.Larson.2016	Jenny Lake	North America>United States Of America>Wyoming	43.7505	-110.734	2070	10.1016/j.quascirev.2016.02.024		www.ncdc.noaa.gov/paleo/study/20128		LakeSediment							dbd	g/cm3								69	14552	109	1.76012					http://lipdverse.org/wNAm/0_15_0/Jenny.Larson.2016.html
Jenny.Larson.2016	Jenny Lake	North America>United States Of America>Wyoming	43.7505	-110.734	2070	10.1016/j.quascirev.2016.02.024		www.ncdc.noaa.gov/paleo/study/20128		LakeSediment							LOI	percent								69	14552	109	1.76012					http://lipdverse.org/wNAm/0_15_0/Jenny.Larson.2016.html
Jenny.Larson.2016	Jenny Lake	North America>United States Of America>Wyoming	43.7505	-110.734	2070	10.1016/j.quascirev.2016.02.024		www.ncdc.noaa.gov/paleo/study/20128		LakeSediment							BSi	percent								69	14552	109	1.76012					http://lipdverse.org/wNAm/0_15_0/Jenny.Larson.2016.html
Jenny.Larson.2016	Jenny Lake	North America>United States Of America>Wyoming	43.7505	-110.734	2070	10.1016/j.quascirev.2016.02.024		www.ncdc.noaa.gov/paleo/study/20128		LakeSediment							clastic	percent								69	14552	109	1.76012					http://lipdverse.org/wNAm/0_15_0/Jenny.Larson.2016.html
Jenny.Larson.2016	Jenny Lake	North America>United States Of America>Wyoming	43.7505	-110.734	2070	10.1016/j.quascirev.2016.02.024		www.ncdc.noaa.gov/paleo/study/20128		LakeSediment							d13C	permil								69	14552	109	1.76012					http://lipdverse.org/wNAm/0_15_0/Jenny.Larson.2016.html
Jenny.Larson.2016	Jenny Lake	North America>United States Of America>Wyoming	43.7505	-110.734	2070	10.1016/j.quascirev.2016.02.024		www.ncdc.noaa.gov/paleo/study/20128		LakeSediment							TOC	percent								69	14552	109	1.76012					http://lipdverse.org/wNAm/0_15_0/Jenny.Larson.2016.html
Jenny.Larson.2016	Jenny Lake	North America>United States Of America>Wyoming	43.7505	-110.734	2070	10.1016/j.quascirev.2016.02.024		www.ncdc.noaa.gov/paleo/study/20128		LakeSediment							d15N	permil								69	14552	109	1.76012					http://lipdverse.org/wNAm/0_15_0/Jenny.Larson.2016.html
Jenny.Larson.2016	Jenny Lake	North America>United States Of America>Wyoming	43.7505	-110.734	2070	10.1016/j.quascirev.2016.02.024		www.ncdc.noaa.gov/paleo/study/20128		LakeSediment							C/N	unitless								69	14552	109	1.76012					http://lipdverse.org/wNAm/0_15_0/Jenny.Larson.2016.html
Jenny.Larson.2016	Jenny Lake	North America>United States Of America>Wyoming	43.7505	-110.734	2070	10.1016/j.quascirev.2016.02.024		www.ncdc.noaa.gov/paleo/study/20128		LakeSediment							TOC_flux	g/cm2/kyr								69	14552	109	1.76012					http://lipdverse.org/wNAm/0_15_0/Jenny.Larson.2016.html
Jenny.Larson.2016	Jenny Lake	North America>United States Of America>Wyoming	43.7505	-110.734	2070	10.1016/j.quascirev.2016.02.024		www.ncdc.noaa.gov/paleo/study/20128		LakeSediment							LOI	g/cm2/kyr								69	14552	109	1.76012					http://lipdverse.org/wNAm/0_15_0/Jenny.Larson.2016.html
Jenny.Larson.2016	Jenny Lake	North America>United States Of America>Wyoming	43.7505	-110.734	2070	10.1016/j.quascirev.2016.02.024		www.ncdc.noaa.gov/paleo/study/20128		LakeSediment							BSi	g/cm2/kyr								69	14552	109	1.76012					http://lipdverse.org/wNAm/0_15_0/Jenny.Larson.2016.html
KeystoneIronbog.Fall.1985	Keystone Iron Bog	North America>United States Of America>Colorado	38.87	-107.03	2920	Fall, P.L. 1985. Holocene dynamics of the subalpine forest in central colorado. American Association of Stratigraphic Palynologists Contribution Series No. 16:31-46.	10.1038/nature25464	www.ncdc.noaa.gov/paleo/study/27330	10.21233/N3704Q	LakeSediment	pollen			MAT			precipitation	mm		P	@surface		annual	annual		-5	9168	295	0.545078			JM		http://lipdverse.org/wNAm/0_15_0/KeystoneIronbog.Fall.1985.html
KirmanLake.MacDonald.2016	Kirman Lake	North America>United States Of America>California	38.34	-119.5	2174	10.1038/srep33325		dataverse.harvard.edu/dataverse/UCLAGMacDonald		LakeSediment							LOI	percent								-33	11523	36	0.692281					http://lipdverse.org/wNAm/0_15_0/KirmanLake.MacDonald.2016.html
KirmanLake.MacDonald.2016	Kirman Lake	North America>United States Of America>California	38.34	-119.5	2174	10.1038/srep33325		dataverse.harvard.edu/dataverse/UCLAGMacDonald		LakeSediment							P. nitidum	degC								-33	11617	14	0.686695					http://lipdverse.org/wNAm/0_15_0/KirmanLake.MacDonald.2016.html
KirmanLake.MacDonald.2016	Kirman Lake	North America>United States Of America>California	38.34	-119.5	2174	10.1038/srep33325		dataverse.harvard.edu/dataverse/UCLAGMacDonald		LakeSediment							V humeralis	degC								-33	11617	14	0.686695					http://lipdverse.org/wNAm/0_15_0/KirmanLake.MacDonald.2016.html
KirmanLake.MacDonald.2016	Kirman Lake	North America>United States Of America>California	38.34	-119.5	2174	10.1038/srep33325		dataverse.harvard.edu/dataverse/UCLAGMacDonald		LakeSediment							d13C	permil								5	10677	483	0.749625					http://lipdverse.org/wNAm/0_15_0/KirmanLake.MacDonald.2016.html
KirmanLake.MacDonald.2016	Kirman Lake	North America>United States Of America>California	38.34	-119.5	2174	10.1038/srep33325		dataverse.harvard.edu/dataverse/UCLAGMacDonald		LakeSediment							d15N	permil								5	10677	483	0.749625					http://lipdverse.org/wNAm/0_15_0/KirmanLake.MacDonald.2016.html
KirmanLake.MacDonald.2016	Kirman Lake	North America>United States Of America>California	38.34	-119.5	2174	10.1038/srep33325		dataverse.harvard.edu/dataverse/UCLAGMacDonald		LakeSediment							C/N	unitless								5	10677	483	0.749625					http://lipdverse.org/wNAm/0_15_0/KirmanLake.MacDonald.2016.html
KirmanLake.MacDonald.2016	Kirman Lake	North America>United States Of America>California	38.34	-119.5	2174	10.1038/srep33325		dataverse.harvard.edu/dataverse/UCLAGMacDonald		LakeSediment							pinus/atremisia	unitless								-33	9643	467	0.826788					http://lipdverse.org/wNAm/0_15_0/KirmanLake.MacDonald.2016.html
KirmanLake.MacDonald.2016	Kirman Lake	North America>United States Of America>California	38.34	-119.5	2174	10.1038/srep33325		dataverse.harvard.edu/dataverse/UCLAGMacDonald		LakeSediment	charcoal						chacoal_influx	no/cm2/yr		FIRE			annual	annual		-33	11564	36	0.689834					http://lipdverse.org/wNAm/0_15_0/KirmanLake.MacDonald.2016.html
KiteLake.JimenezMoreno.2012	Kite Lake	North America>United States Of America>Colorado	39.3295	-106.13	3668	10.1177/0959683612450199		wNAm		LakeSediment							Picea	percent								0	15514	48	0.916667					http://lipdverse.org/wNAm/0_15_0/KiteLake.JimenezMoreno.2012.html
KiteLake.JimenezMoreno.2012	Kite Lake	North America>United States Of America>Colorado	39.3295	-106.13	3668	10.1177/0959683612450199		wNAm		LakeSediment							PinusTotal	Precent								0	15514	48	0.916667					http://lipdverse.org/wNAm/0_15_0/KiteLake.JimenezMoreno.2012.html
KiteLake.JimenezMoreno.2012	Kite Lake	North America>United States Of America>Colorado	39.3295	-106.13	3668	10.1177/0959683612450199		wNAm		LakeSediment							Artemisia	percent								0	15514	48	0.916667					http://lipdverse.org/wNAm/0_15_0/KiteLake.JimenezMoreno.2012.html
KNR159_JPC26.Antonarakou.2015	KNR159_JPC26	Atlantic Ocean>North Atlantic Ocean>Gulf Of Mexico	26.374	-92.027	-1995	10.1016/j.gca.2015.08.003	10.2110/palo.2012.p12-060r	www.ncdc.noaa.gov/paleo/study/27330		MarineSediment							d18o_ruber_lato	per mil vs VPDB								510	21130	350	0.435161					http://lipdverse.org/wNAm/0_15_0/KNR159_JPC26.Antonarakou.2015.html
KNR159_JPC26.Antonarakou.2015	KNR159_JPC26	Atlantic Ocean>North Atlantic Ocean>Gulf Of Mexico	26.374	-92.027	-1995	10.1016/j.gca.2015.08.003	10.2110/palo.2012.p12-060r	www.ncdc.noaa.gov/paleo/study/27330		MarineSediment							d18o_ruber_stricto	per mil vs VPDB								510	21130	350	0.435161					http://lipdverse.org/wNAm/0_15_0/KNR159_JPC26.Antonarakou.2015.html
KNR159_JPC26.Antonarakou.2015	KNR159_JPC26	Atlantic Ocean>North Atlantic Ocean>Gulf Of Mexico	26.374	-92.027	-1995	10.1016/j.gca.2015.08.003	10.2110/palo.2012.p12-060r	www.ncdc.noaa.gov/paleo/study/27330		MarineSediment							mgca_ruber_lato	mmol/mol								510	21130	350	0.435161					http://lipdverse.org/wNAm/0_15_0/KNR159_JPC26.Antonarakou.2015.html
KNR159_JPC26.Antonarakou.2015	KNR159_JPC26	Atlantic Ocean>North Atlantic Ocean>Gulf Of Mexico	26.374	-92.027	-1995	10.1016/j.gca.2015.08.003	10.2110/palo.2012.p12-060r	www.ncdc.noaa.gov/paleo/study/27330		MarineSediment							mgca_ruber_stricto	mmol/mol								510	21130	350	0.435161					http://lipdverse.org/wNAm/0_15_0/KNR159_JPC26.Antonarakou.2015.html
KoksilahRiverDischarge.Brown.2015	Koksilah River	North America>Canada>British Columbia	48.755	-123.682	14	10.1016/j.yqres.2015.03.003		wNAm		LakeSediment	pollen						JanQ	mm		M			1		positive	0	10000	250						http://lipdverse.org/wNAm/0_15_0/KoksilahRiverDischarge.Brown.2015.html
KoksilahRiverDischarge.Brown.2015	Koksilah River	North America>Canada>British Columbia	48.755	-123.682	14	10.1016/j.yqres.2015.03.003		wNAm		LakeSediment	pollen						FebQ	mm		M			2		positive	0	10000	250						http://lipdverse.org/wNAm/0_15_0/KoksilahRiverDischarge.Brown.2015.html
KoksilahRiverDischarge.Brown.2015	Koksilah River	North America>Canada>British Columbia	48.755	-123.682	14	10.1016/j.yqres.2015.03.003		wNAm		LakeSediment	pollen						MarchQ	mm		M			3		positive	0	10000	250						http://lipdverse.org/wNAm/0_15_0/KoksilahRiverDischarge.Brown.2015.html
KoksilahRiverDischarge.Brown.2015	Koksilah River	North America>Canada>British Columbia	48.755	-123.682	14	10.1016/j.yqres.2015.03.003		wNAm		LakeSediment	pollen						AprQ	mm		M			4		positive	0	10000	250						http://lipdverse.org/wNAm/0_15_0/KoksilahRiverDischarge.Brown.2015.html
KoksilahRiverDischarge.Brown.2015	Koksilah River	North America>Canada>British Columbia	48.755	-123.682	14	10.1016/j.yqres.2015.03.003		wNAm		LakeSediment	pollen						MayQ	mm		M			5		positive	0	10000	250						http://lipdverse.org/wNAm/0_15_0/KoksilahRiverDischarge.Brown.2015.html
KoksilahRiverDischarge.Brown.2015	Koksilah River	North America>Canada>British Columbia	48.755	-123.682	14	10.1016/j.yqres.2015.03.003		wNAm		LakeSediment	pollen						JuneQ	mm		M			6		positive	0	10000	250						http://lipdverse.org/wNAm/0_15_0/KoksilahRiverDischarge.Brown.2015.html
KoksilahRiverDischarge.Brown.2015	Koksilah River	North America>Canada>British Columbia	48.755	-123.682	14	10.1016/j.yqres.2015.03.003		wNAm		LakeSediment	pollen						JulyQ	mm		M			7		positive	0	10000	250						http://lipdverse.org/wNAm/0_15_0/KoksilahRiverDischarge.Brown.2015.html
KoksilahRiverDischarge.Brown.2015	Koksilah River	North America>Canada>British Columbia	48.755	-123.682	14	10.1016/j.yqres.2015.03.003		wNAm		LakeSediment	pollen						AugQ	mm		M			8		positive	0	10000	250						http://lipdverse.org/wNAm/0_15_0/KoksilahRiverDischarge.Brown.2015.html
KoksilahRiverDischarge.Brown.2015	Koksilah River	North America>Canada>British Columbia	48.755	-123.682	14	10.1016/j.yqres.2015.03.003		wNAm		LakeSediment	pollen						SeptQ	mm		M					positive	0	10000	250						http://lipdverse.org/wNAm/0_15_0/KoksilahRiverDischarge.Brown.2015.html
KoksilahRiverDischarge.Brown.2015	Koksilah River	North America>Canada>British Columbia	48.755	-123.682	14	10.1016/j.yqres.2015.03.003		wNAm		LakeSediment	pollen						OctQ	mm		M					positive	0	10000	250						http://lipdverse.org/wNAm/0_15_0/KoksilahRiverDischarge.Brown.2015.html
KoksilahRiverDischarge.Brown.2015	Koksilah River	North America>Canada>British Columbia	48.755	-123.682	14	10.1016/j.yqres.2015.03.003		wNAm		LakeSediment	pollen						NovQ	mm		M					positive	0	10000	250						http://lipdverse.org/wNAm/0_15_0/KoksilahRiverDischarge.Brown.2015.html
KoksilahRiverDischarge.Brown.2015	Koksilah River	North America>Canada>British Columbia	48.755	-123.682	14	10.1016/j.yqres.2015.03.003		wNAm		LakeSediment	pollen						DecQ	mm		M					positive	0	10000	250						http://lipdverse.org/wNAm/0_15_0/KoksilahRiverDischarge.Brown.2015.html
LagoPuertoArturo.Wahl.2014	Lago Puerto Arturo	North America>Central America>Guatemala	17.533	-90.183	179	10.1016/j.quascirev.2014.08.004	10.1016/j.yqres.2005.10.004	wNAm		LakeSediment							sample_thickness	cm								443	8710	31	1.33059					http://lipdverse.org/wNAm/0_15_0/LagoPuertoArturo.Wahl.2014.html
LagunaDeAljojuca.Bhattacharya.2015	Laguna De Aljojuca	North America>Mexico	19.0915	-97.5338	2376	10.1073/pnas.1405653112		www.ncdc.noaa.gov/paleo/study/17735		LakeSediment							d13C	permil								-49.2	4139.7	13.1	3.34217					http://lipdverse.org/wNAm/0_15_0/LagunaDeAljojuca.Bhattacharya.2015.html
LagunaDeJuanacatlan.Jones.2015	Laguna de Juanacatlan	North America>Mexico	20.6293	-104.736	2000	10.1016/j.quascirev.2015.07.004	10.1177/0959683610371994	wNAm		LakeSediment							CAL	unitless										1						http://lipdverse.org/wNAm/0_15_0/LagunaDeJuanacatlan.Jones.2015.html
LagunaDeJuanacatlan.Jones.2015	Laguna de Juanacatlan	North America>Mexico	20.6293	-104.736	2000	10.1016/j.quascirev.2015.07.004	10.1177/0959683610371994	wNAm		LakeSediment	Ti	uchannel XRF				Ti_peakArea	Ti	peak area		M	monsoon	monsoon	annual	annual	positive	-51	1949	1	12					http://lipdverse.org/wNAm/0_15_0/LagunaDeJuanacatlan.Jones.2015.html
LagunaDeJuanacatlan.Jones.2015	Laguna de Juanacatlan	North America>Mexico	20.6293	-104.736	2000	10.1016/j.quascirev.2015.07.004	10.1177/0959683610371994	wNAm		LakeSediment							CAL	unitless										1						http://lipdverse.org/wNAm/0_15_0/LagunaDeJuanacatlan.Jones.2015.html
LakeOfTheWoods.Pribyl.2014	Lake of the Woods	North America>United States Of America>Wyoming	43.4822	-109.893	2820	10.1016/j.yqres.2014.01.012	10.1029/2009GL042196	wNAm		LakeSediment	stratigraphy					Elevation below modern, upper bound	lakeLevelHi	cm			effective		annual		negative	50	17900	50	1.75732					http://lipdverse.org/wNAm/0_15_0/LakeOfTheWoods.Pribyl.2014.html
LakeOfTheWoods.Pribyl.2014	Lake of the Woods	North America>United States Of America>Wyoming	43.4822	-109.893	2820	10.1016/j.yqres.2014.01.012	10.1029/2009GL042196	wNAm		LakeSediment	stratigraphy					Elevation below modern, lower bound	lakeLevelLo	cm			effective		annual		negative	50	17900	50	1.75732					http://lipdverse.org/wNAm/0_15_0/LakeOfTheWoods.Pribyl.2014.html
LakeStowell.Lemmen.2018	Stowell Lake	North America>Canada>British Columbia	48.7833	-123.445	70	10.1007/s10933-017-9998-3		www.ncdc.noaa.gov/paleo/study/27330		LakeSediment	chironomid			WA-PLS		using Fortin calibration	temperature			T			7		positive	-57	14183	107.5	0.497636					http://lipdverse.org/wNAm/0_15_0/LakeStowell.Lemmen.2018.html
LakeStowell.Lemmen.2018	Stowell Lake	North America>Canada>British Columbia	48.7833	-123.445	70	10.1007/s10933-017-9998-3		www.ncdc.noaa.gov/paleo/study/27330		LakeSediment	chironomid			WA-PLS		using Barley calibration	temperature			T			7		positive	-57	14183	107.5	0.497636					http://lipdverse.org/wNAm/0_15_0/LakeStowell.Lemmen.2018.html
LehmanCaves.Steponaitis.2015	Lehman Caves	North America>United States Of America>Nevada	39.0006	-114.22	2130	10.1016/j.quascirev.2015.04.011		www.ncdc.noaa.gov/paleo/study/19038		Speleothem							WR11_d18O	permil								3836	11446	52	1.83968					http://lipdverse.org/wNAm/0_15_0/LehmanCaves.Steponaitis.2015.html
LehmanCaves.Steponaitis.2015	Lehman Caves	North America>United States Of America>Nevada	39.0006	-114.22	2130	10.1016/j.quascirev.2015.04.011		www.ncdc.noaa.gov/paleo/study/19038		Speleothem							CDR3_d18O	permil								10170	16400	14	7.65027					http://lipdverse.org/wNAm/0_15_0/LehmanCaves.Steponaitis.2015.html
LehmanCaves.Steponaitis.2015	Lehman Caves	North America>United States Of America>Nevada	39.0006	-114.22	2130	10.1016/j.quascirev.2015.04.011		www.ncdc.noaa.gov/paleo/study/19038		Speleothem							CDR3_d13C	permil								10170	16400	14	7.65027					http://lipdverse.org/wNAm/0_15_0/LehmanCaves.Steponaitis.2015.html
LehmanCaves.Steponaitis.2015	Lehman Caves	North America>United States Of America>Nevada	39.0006	-114.22	2130	10.1016/j.quascirev.2015.04.011		www.ncdc.noaa.gov/paleo/study/19038		Speleothem							WR11_SrCa	m								3977	11449	97	1.87366					http://lipdverse.org/wNAm/0_15_0/LehmanCaves.Steponaitis.2015.html
LehmanCaves.Steponaitis.2015	Lehman Caves	North America>United States Of America>Nevada	39.0006	-114.22	2130	10.1016/j.quascirev.2015.04.011		www.ncdc.noaa.gov/paleo/study/19038		Speleothem							CDR3_MgCa	m								10164	16400	30	7.62527					http://lipdverse.org/wNAm/0_15_0/LehmanCaves.Steponaitis.2015.html
LehmanCaves.Steponaitis.2015	Lehman Caves	North America>United States Of America>Nevada	39.0006	-114.22	2130	10.1016/j.quascirev.2015.04.011		www.ncdc.noaa.gov/paleo/study/19038		Speleothem							CDR3_SrCa	m								10164	16400	30	7.62527					http://lipdverse.org/wNAm/0_15_0/LehmanCaves.Steponaitis.2015.html
Leviathan.Lachniet.2014	Leviathan	North America>United States Of America>Nevada	37.89	-115.58	2400	10.1038/ncomms4805		www.ncdc.noaa.gov/paleo/study/16517		Speleothem	d18O					air@surface	d18O	permil		T			annual	annual	positive	0	174100	50	1.25			DSK	interpolated 50-year values	http://lipdverse.org/wNAm/0_15_0/Leviathan.Lachniet.2014.html
LittleMolas.Toney.2006	Little Molas Lake	North America>United States Of America>Colorado	37.742	-107.708	3330	10.1191/0959683606hl946rp		wNAm	40543	LakeSediment							Picea	count								1434	11251	327	0.611185					http://lipdverse.org/wNAm/0_15_0/LittleMolas.Toney.2006.html
LittleMolas.Toney.2006	Little Molas Lake	North America>United States Of America>Colorado	37.742	-107.708	3330	10.1191/0959683606hl946rp		wNAm	40543	LakeSediment							Abies	count								1434	11251	327	0.611185					http://lipdverse.org/wNAm/0_15_0/LittleMolas.Toney.2006.html
LittleMolas.Toney.2006	Little Molas Lake	North America>United States Of America>Colorado	37.742	-107.708	3330	10.1191/0959683606hl946rp		wNAm	40543	LakeSediment							Pine	count								1434	11251	327	0.611185					http://lipdverse.org/wNAm/0_15_0/LittleMolas.Toney.2006.html
LittleMolas.Toney.2006	Little Molas Lake	North America>United States Of America>Colorado	37.742	-107.708	3330	10.1191/0959683606hl946rp		wNAm	40543	LakeSediment							Artemisia	count								1434	11251	327	0.611185					http://lipdverse.org/wNAm/0_15_0/LittleMolas.Toney.2006.html
LittleWindy.Minckley.2012	Little Windy	North America>United States Of America>Wyoming	41.43	-106.33	2983	10.1890/11-0283.1		www.ncdc.noaa.gov/paleo/study/16096		LakeSediment							MaxElevM	m								50	12000	50	1.42259					http://lipdverse.org/wNAm/0_15_0/LittleWindy.Minckley.2012.html
LittleWindy.Minckley.2012	Little Windy	North America>United States Of America>Wyoming	41.43	-106.33	2983	10.1890/11-0283.1		www.ncdc.noaa.gov/paleo/study/16096		LakeSediment							MinElevM	m								50	12000	50	1.42259					http://lipdverse.org/wNAm/0_15_0/LittleWindy.Minckley.2012.html
LittleWindy.Minckley.2012	Little Windy	North America>United States Of America>Wyoming	41.43	-106.33	2983	10.1890/11-0283.1		www.ncdc.noaa.gov/paleo/study/16096		LakeSediment							Recon0x2EDate	unitless								50	12000	50	1.42259					http://lipdverse.org/wNAm/0_15_0/LittleWindy.Minckley.2012.html
LowderCreekBog.Anderson.1999	Lowder Creek Bog	North America>United States Of America>Utah	37.6644	-112.775	3077	10.1080/15230430.1999.12003321		wNAm	14549	Peat							TotalPollen	count								-42	15806	383.5	0.249128					http://lipdverse.org/wNAm/0_15_0/LowderCreekBog.Anderson.1999.html
LowderCreekBog.Anderson.1999	Lowder Creek Bog	North America>United States Of America>Utah	37.6644	-112.775	3077	10.1080/15230430.1999.12003321		wNAm	14549	Peat							PiceaCount	percent								-42	15806	383.5	0.249128					http://lipdverse.org/wNAm/0_15_0/LowderCreekBog.Anderson.1999.html
LowderCreekBog.Anderson.1999	Lowder Creek Bog	North America>United States Of America>Utah	37.6644	-112.775	3077	10.1080/15230430.1999.12003321		wNAm	14549	Peat							Picea	percent								-42	15806	383.5	0.249128					http://lipdverse.org/wNAm/0_15_0/LowderCreekBog.Anderson.1999.html
LowderCreekBog.Anderson.1999	Lowder Creek Bog	North America>United States Of America>Utah	37.6644	-112.775	3077	10.1080/15230430.1999.12003321		wNAm	14549	Peat							PinusTotalCount	count								-42	15806	383.5	0.249128					http://lipdverse.org/wNAm/0_15_0/LowderCreekBog.Anderson.1999.html
LowderCreekBog.Anderson.1999	Lowder Creek Bog	North America>United States Of America>Utah	37.6644	-112.775	3077	10.1080/15230430.1999.12003321		wNAm	14549	Peat							PinusTotal	percent								-42	15806	383.5	0.249128					http://lipdverse.org/wNAm/0_15_0/LowderCreekBog.Anderson.1999.html
LowderCreekBog.Anderson.1999	Lowder Creek Bog	North America>United States Of America>Utah	37.6644	-112.775	3077	10.1080/15230430.1999.12003321		wNAm	14549	Peat							ArtemisiaCount	count								-42	15806	383.5	0.249128					http://lipdverse.org/wNAm/0_15_0/LowderCreekBog.Anderson.1999.html
LowderCreekBog.Anderson.1999	Lowder Creek Bog	North America>United States Of America>Utah	37.6644	-112.775	3077	10.1080/15230430.1999.12003321		wNAm	14549	Peat							Artemisia	percent								-42	15806	383.5	0.249128					http://lipdverse.org/wNAm/0_15_0/LowderCreekBog.Anderson.1999.html
LowderCreekBog.Anderson.1999	Lowder Creek Bog	North America>United States Of America>Utah	37.6644	-112.775	3077	10.1080/15230430.1999.12003321		wNAm	14549	Peat	pollen						PinusEdulisCount	percent								-42	15806	383.5	0.249128					http://lipdverse.org/wNAm/0_15_0/LowderCreekBog.Anderson.1999.html
LowerBearLake.Kirby.2012	Lower Bear Lake	North America>United States Of America>California	34.2	-116.9	2059	10.1016/j.quascirev.2012.05.008		www.ncdc.noaa.gov/paleo/study/13215		LakeSediment							MassMagSus	m3kg1								475.51	9355.9	17.26	3.71605					http://lipdverse.org/wNAm/0_15_0/LowerBearLake.Kirby.2012.html
LowerBearLake.Kirby.2012	Lower Bear Lake	North America>United States Of America>California	34.2	-116.9	2059	10.1016/j.quascirev.2012.05.008		www.ncdc.noaa.gov/paleo/study/13215		LakeSediment							LOI	m								475.51	9355.9	17.26	3.71605					http://lipdverse.org/wNAm/0_15_0/LowerBearLake.Kirby.2012.html
Macal.Akers.2016	Macal Chasm	North America>Central America>Belize	16.883	-89.108	530	10.1016/j.palaeo.2016.07.007		www.ncdc.noaa.gov/paleo/study/20506		Speleothem							sampleID	unitless										3.6						http://lipdverse.org/wNAm/0_15_0/Macal.Akers.2016.html
Marcella.Anderson.2007	Marcella	North America>Canada>Yukon Territory	60.0733	-133.805	749	10.1016/j.quascirev.2006.04.011		www.ncdc.noaa.gov/paleo/study/6066		LakeSediment	d13C						d13C	permil								-50	4732	29	0.627353					http://lipdverse.org/wNAm/0_15_0/Marcella.Anderson.2007.html
MD02_2503.Hill.2006	MD02_2503	Pacific Ocean>North Pacific Ocean	34.3862	-120.037	-569	10.1016/j.quascirev.2006.03.012		www.ncdc.noaa.gov/paleo/study/5582		MarineSediment							d18o_bulloides	per mil vs VPDB								141.492	35767	138.041	0.927604					http://lipdverse.org/wNAm/0_15_0/MD02_2503.Hill.2006.html
MD02_2515.McClymont.2012	MD02_2515	Pacific Ocean>North Pacific Ocean	27.4835	-112.074	-881	10.1029/2011PA002226		10.1594/PANGAEA.861260		MarineSediment							Uk37	unitless								6825.4	24988.8	30.192	0.773007					http://lipdverse.org/wNAm/0_15_0/MD02_2515.McClymont.2012.html
MD02_2515.McClymont.2012	MD02_2515	Pacific Ocean>North Pacific Ocean	27.4835	-112.074	-881	10.1029/2011PA002226		10.1594/PANGAEA.861260		MarineSediment							TEX86	unitless								6825.4	24988.8	46.85	0.773007					http://lipdverse.org/wNAm/0_15_0/MD02_2515.McClymont.2012.html
MD02-2499.Lopez.2018	MD02-2499	Pacific Ocean>North Pacific Ocean	41.6517	-124.938	-905	10.1029/2018PA003352		www.ncdc.noaa.gov/paleo/study/24150		MarineSediment							depth_cmbs	cm								8223	30956	405	0.529521					http://lipdverse.org/wNAm/0_15_0/MD02-2499.Lopez.2018.html
MD02-2499.Lopez.2018	MD02-2499	Pacific Ocean>North Pacific Ocean	41.6517	-124.938	-905	10.1029/2018PA003352		www.ncdc.noaa.gov/paleo/study/24150		MarineSediment	diatom						productivity	g/m2/yr								8223	30956	405	0.529521					http://lipdverse.org/wNAm/0_15_0/MD02-2499.Lopez.2018.html
MD02-2515.Bhattacharya.2018	Guaymas Basin	Pacific Ocean>North Pacific Ocean	27.48	-112.07	-881	10.1038/s41561-018-0220-7	10.1029/2011PA002226	www.ncdc.noaa.gov/paleo/study/24890		MarineSediment	dD						d2H	permil								5818	20995	110.3	0.64704					http://lipdverse.org/wNAm/0_15_0/MD02-2515.Bhattacharya.2018.html
MD02-2515.Bhattacharya.2018	Guaymas Basin	Pacific Ocean>North Pacific Ocean	27.48	-112.07	-881	10.1038/s41561-018-0220-7	10.1029/2011PA002226	www.ncdc.noaa.gov/paleo/study/24890		MarineSediment							d2H	permil								5818	20995	110.3	0.64704					http://lipdverse.org/wNAm/0_15_0/MD02-2515.Bhattacharya.2018.html
MD02-2515.Bhattacharya.2018	Guaymas Basin	Pacific Ocean>North Pacific Ocean	27.48	-112.07	-881	10.1038/s41561-018-0220-7	10.1029/2011PA002226	www.ncdc.noaa.gov/paleo/study/24890		MarineSediment	d13C						d13C	permil								5818	20995	110.3	0.64704					http://lipdverse.org/wNAm/0_15_0/MD02-2515.Bhattacharya.2018.html
MD02-2515.Bhattacharya.2018	Guaymas Basin	Pacific Ocean>North Pacific Ocean	27.48	-112.07	-881	10.1038/s41561-018-0220-7	10.1029/2011PA002226	www.ncdc.noaa.gov/paleo/study/24890		MarineSediment							JAS_error	percent								5818	20995	110.3	0.64704					http://lipdverse.org/wNAm/0_15_0/MD02-2515.Bhattacharya.2018.html
MD02-2517.Bhattacharya.2018	Guaymas Basin	Pacific Ocean>North Pacific Ocean	27.48	-112.07	-881	10.1038/s41561-018-0220-7		www.ncdc.noaa.gov/paleo/study/24890		MarineSediment							d2H	permil								1571.8	5795.4	144.8	1.89412					http://lipdverse.org/wNAm/0_15_0/MD02-2517.Bhattacharya.2018.html
MD02-2517.Bhattacharya.2018	Guaymas Basin	Pacific Ocean>North Pacific Ocean	27.48	-112.07	-881	10.1038/s41561-018-0220-7		www.ncdc.noaa.gov/paleo/study/24890		MarineSediment							d2H	permil								1571.8	5795.4	144.8	1.89412					http://lipdverse.org/wNAm/0_15_0/MD02-2517.Bhattacharya.2018.html
MD02-2517.Bhattacharya.2018	Guaymas Basin	Pacific Ocean>North Pacific Ocean	27.48	-112.07	-881	10.1038/s41561-018-0220-7		www.ncdc.noaa.gov/paleo/study/24890		MarineSediment							d13C	permil								1571.8	5795.4	144.8	1.89412					http://lipdverse.org/wNAm/0_15_0/MD02-2517.Bhattacharya.2018.html
MD02-2517.Bhattacharya.2018	Guaymas Basin	Pacific Ocean>North Pacific Ocean	27.48	-112.07	-881	10.1038/s41561-018-0220-7		www.ncdc.noaa.gov/paleo/study/24890		MarineSediment							JAS_error	percent								1571.8	5795.4	144.8	1.89412					http://lipdverse.org/wNAm/0_15_0/MD02-2517.Bhattacharya.2018.html
MiddenCluster1.Harbert.2018	Midden Cluster 1	North America>United States Of America>Utah	37.9049	-110.13	1835	10.5334/oq.46	10.1038/s41597-020-0445-3	geochange.er.usgs.gov/midden/		Midden							latitude sample	decimal degrees								0	15211	27						http://lipdverse.org/wNAm/0_15_0/MiddenCluster1.Harbert.2018.html
MiddenCluster1.Harbert.2018	Midden Cluster 1	North America>United States Of America>Utah	37.9049	-110.13	1835	10.5334/oq.46	10.1038/s41597-020-0445-3	geochange.er.usgs.gov/midden/		Midden							longitude sample	decimal degrees								0	15211	27						http://lipdverse.org/wNAm/0_15_0/MiddenCluster1.Harbert.2018.html
MiddenCluster1.Harbert.2018	Midden Cluster 1	North America>United States Of America>Utah	37.9049	-110.13	1835	10.5334/oq.46	10.1038/s41597-020-0445-3	geochange.er.usgs.gov/midden/		Midden							elevation sample	m								0	15211	27						http://lipdverse.org/wNAm/0_15_0/MiddenCluster1.Harbert.2018.html
MiddenCluster1.Harbert.2018	Midden Cluster 1	North America>United States Of America>Utah	37.9049	-110.13	1835	10.5334/oq.46	10.1038/s41597-020-0445-3	geochange.er.usgs.gov/midden/		Midden							plotName	unitless										27						http://lipdverse.org/wNAm/0_15_0/MiddenCluster1.Harbert.2018.html
MiddenCluster2.Harbert.2018	Midden Cluster 2	North America>United States Of America>Nevada	36.3806	-115.188	1297	10.5334/oq.46	10.1038/s41597-020-0445-3	geochange.er.usgs.gov/midden/		Midden							latitude sample	decimal degrees								0	47262	94.5						http://lipdverse.org/wNAm/0_15_0/MiddenCluster2.Harbert.2018.html
MiddenCluster2.Harbert.2018	Midden Cluster 2	North America>United States Of America>Nevada	36.3806	-115.188	1297	10.5334/oq.46	10.1038/s41597-020-0445-3	geochange.er.usgs.gov/midden/		Midden							longitude sample	decimal degrees								0	47262	94.5						http://lipdverse.org/wNAm/0_15_0/MiddenCluster2.Harbert.2018.html
MiddenCluster2.Harbert.2018	Midden Cluster 2	North America>United States Of America>Nevada	36.3806	-115.188	1297	10.5334/oq.46	10.1038/s41597-020-0445-3	geochange.er.usgs.gov/midden/		Midden							elevation sample	m								0	47262	94.5						http://lipdverse.org/wNAm/0_15_0/MiddenCluster2.Harbert.2018.html
MiddenCluster2.Harbert.2018	Midden Cluster 2	North America>United States Of America>Nevada	36.3806	-115.188	1297	10.5334/oq.46	10.1038/s41597-020-0445-3	geochange.er.usgs.gov/midden/		Midden							plotName	unitless										94.5						http://lipdverse.org/wNAm/0_15_0/MiddenCluster2.Harbert.2018.html
MiddenCluster3.Harbert.2018	Midden Cluster 3	North America>United States Of America>New Mexico	36.0589	-108.082	1848	10.5334/oq.46	10.1038/s41597-020-0445-3	geochange.er.usgs.gov/midden/		Midden							latitude sample	decimal degrees								0	13745	325						http://lipdverse.org/wNAm/0_15_0/MiddenCluster3.Harbert.2018.html
MiddenCluster3.Harbert.2018	Midden Cluster 3	North America>United States Of America>New Mexico	36.0589	-108.082	1848	10.5334/oq.46	10.1038/s41597-020-0445-3	geochange.er.usgs.gov/midden/		Midden							longitude sample	decimal degrees								0	13745	325						http://lipdverse.org/wNAm/0_15_0/MiddenCluster3.Harbert.2018.html
MiddenCluster3.Harbert.2018	Midden Cluster 3	North America>United States Of America>New Mexico	36.0589	-108.082	1848	10.5334/oq.46	10.1038/s41597-020-0445-3	geochange.er.usgs.gov/midden/		Midden							elevation sample	m								0	13745	325						http://lipdverse.org/wNAm/0_15_0/MiddenCluster3.Harbert.2018.html
MiddenCluster3.Harbert.2018	Midden Cluster 3	North America>United States Of America>New Mexico	36.0589	-108.082	1848	10.5334/oq.46	10.1038/s41597-020-0445-3	geochange.er.usgs.gov/midden/		Midden							plotName	unitless										325						http://lipdverse.org/wNAm/0_15_0/MiddenCluster3.Harbert.2018.html
MiddenCluster4.Harbert.2018	Midden Cluster 4	North America>United States Of America>Idaho	43.6488	-112.745	1517	10.5334/oq.46	10.1038/s41597-020-0445-3	geochange.er.usgs.gov/midden/		Midden							latitude sample	decimal degrees								0	6645	317.5						http://lipdverse.org/wNAm/0_15_0/MiddenCluster4.Harbert.2018.html
MiddenCluster4.Harbert.2018	Midden Cluster 4	North America>United States Of America>Idaho	43.6488	-112.745	1517	10.5334/oq.46	10.1038/s41597-020-0445-3	geochange.er.usgs.gov/midden/		Midden							longitude sample	decimal degrees								0	6645	317.5						http://lipdverse.org/wNAm/0_15_0/MiddenCluster4.Harbert.2018.html
MiddenCluster4.Harbert.2018	Midden Cluster 4	North America>United States Of America>Idaho	43.6488	-112.745	1517	10.5334/oq.46	10.1038/s41597-020-0445-3	geochange.er.usgs.gov/midden/		Midden							elevation sample	m								0	6645	317.5						http://lipdverse.org/wNAm/0_15_0/MiddenCluster4.Harbert.2018.html
MiddenCluster4.Harbert.2018	Midden Cluster 4	North America>United States Of America>Idaho	43.6488	-112.745	1517	10.5334/oq.46	10.1038/s41597-020-0445-3	geochange.er.usgs.gov/midden/		Midden							plotName	unitless										317.5						http://lipdverse.org/wNAm/0_15_0/MiddenCluster4.Harbert.2018.html
MiddenCluster5.Harbert.2018	Midden Cluster 5	North America>United States Of America>New Mexico	32.4659	-106.02	1760	10.5334/oq.46	10.1038/s41597-020-0445-3	geochange.er.usgs.gov/midden/		Midden							latitude sample	decimal degrees								0	49968	105.5						http://lipdverse.org/wNAm/0_15_0/MiddenCluster5.Harbert.2018.html
MiddenCluster5.Harbert.2018	Midden Cluster 5	North America>United States Of America>New Mexico	32.4659	-106.02	1760	10.5334/oq.46	10.1038/s41597-020-0445-3	geochange.er.usgs.gov/midden/		Midden							longitude sample	decimal degrees								0	49968	105.5						http://lipdverse.org/wNAm/0_15_0/MiddenCluster5.Harbert.2018.html
MiddenCluster5.Harbert.2018	Midden Cluster 5	North America>United States Of America>New Mexico	32.4659	-106.02	1760	10.5334/oq.46	10.1038/s41597-020-0445-3	geochange.er.usgs.gov/midden/		Midden							elevation sample	m								0	49968	105.5						http://lipdverse.org/wNAm/0_15_0/MiddenCluster5.Harbert.2018.html
MiddenCluster5.Harbert.2018	Midden Cluster 5	North America>United States Of America>New Mexico	32.4659	-106.02	1760	10.5334/oq.46	10.1038/s41597-020-0445-3	geochange.er.usgs.gov/midden/		Midden							plotName	unitless										105.5						http://lipdverse.org/wNAm/0_15_0/MiddenCluster5.Harbert.2018.html
MiddenCluster6.Harbert.2018	Midden Cluster 6	North America>United States Of America>New Mexico	32.4659	-106.02	1237	10.5334/oq.46	10.1038/s41597-020-0445-3	geochange.er.usgs.gov/midden/		Midden							latitude sample	decimal degrees								0	35082	172						http://lipdverse.org/wNAm/0_15_0/MiddenCluster6.Harbert.2018.html
MiddenCluster6.Harbert.2018	Midden Cluster 6	North America>United States Of America>New Mexico	32.4659	-106.02	1237	10.5334/oq.46	10.1038/s41597-020-0445-3	geochange.er.usgs.gov/midden/		Midden							longitude sample	decimal degrees								0	35082	172						http://lipdverse.org/wNAm/0_15_0/MiddenCluster6.Harbert.2018.html
MiddenCluster6.Harbert.2018	Midden Cluster 6	North America>United States Of America>New Mexico	32.4659	-106.02	1237	10.5334/oq.46	10.1038/s41597-020-0445-3	geochange.er.usgs.gov/midden/		Midden							elevation sample	m								0	35082	172						http://lipdverse.org/wNAm/0_15_0/MiddenCluster6.Harbert.2018.html
MiddenCluster6.Harbert.2018	Midden Cluster 6	North America>United States Of America>New Mexico	32.4659	-106.02	1237	10.5334/oq.46	10.1038/s41597-020-0445-3	geochange.er.usgs.gov/midden/		Midden							plotName	unitless										172						http://lipdverse.org/wNAm/0_15_0/MiddenCluster6.Harbert.2018.html
MiddenCluster7.Harbert.2018	Midden Cluster 7	North America>United States Of America>California	34.1548	-116.005	573	10.5334/oq.46	10.1038/s41597-020-0445-3	geochange.er.usgs.gov/midden/		Midden							latitude sample	decimal degrees								1178	13803	197						http://lipdverse.org/wNAm/0_15_0/MiddenCluster7.Harbert.2018.html
MiddenCluster7.Harbert.2018	Midden Cluster 7	North America>United States Of America>California	34.1548	-116.005	573	10.5334/oq.46	10.1038/s41597-020-0445-3	geochange.er.usgs.gov/midden/		Midden							longitude sample	decimal degrees								1178	13803	197						http://lipdverse.org/wNAm/0_15_0/MiddenCluster7.Harbert.2018.html
MiddenCluster7.Harbert.2018	Midden Cluster 7	North America>United States Of America>California	34.1548	-116.005	573	10.5334/oq.46	10.1038/s41597-020-0445-3	geochange.er.usgs.gov/midden/		Midden							elevation sample	m								1178	13803	197						http://lipdverse.org/wNAm/0_15_0/MiddenCluster7.Harbert.2018.html
MiddenCluster7.Harbert.2018	Midden Cluster 7	North America>United States Of America>California	34.1548	-116.005	573	10.5334/oq.46	10.1038/s41597-020-0445-3	geochange.er.usgs.gov/midden/		Midden							plotName	unitless										197						http://lipdverse.org/wNAm/0_15_0/MiddenCluster7.Harbert.2018.html
MiddenCluster8.Harbert.2018	Midden Cluster 8	North America>United States Of America>Arizona	32.3106	-109.098	1339	10.5334/oq.46	10.1038/s41597-020-0445-3	geochange.er.usgs.gov/midden/		Midden							latitude sample	decimal degrees								144	34938	93						http://lipdverse.org/wNAm/0_15_0/MiddenCluster8.Harbert.2018.html
MiddenCluster8.Harbert.2018	Midden Cluster 8	North America>United States Of America>Arizona	32.3106	-109.098	1339	10.5334/oq.46	10.1038/s41597-020-0445-3	geochange.er.usgs.gov/midden/		Midden							longitude sample	decimal degrees								144	34938	93						http://lipdverse.org/wNAm/0_15_0/MiddenCluster8.Harbert.2018.html
MiddenCluster8.Harbert.2018	Midden Cluster 8	North America>United States Of America>Arizona	32.3106	-109.098	1339	10.5334/oq.46	10.1038/s41597-020-0445-3	geochange.er.usgs.gov/midden/		Midden							elevation sample	m								144	34938	93						http://lipdverse.org/wNAm/0_15_0/MiddenCluster8.Harbert.2018.html
MiddenCluster8.Harbert.2018	Midden Cluster 8	North America>United States Of America>Arizona	32.3106	-109.098	1339	10.5334/oq.46	10.1038/s41597-020-0445-3	geochange.er.usgs.gov/midden/		Midden							plotName	unitless										93						http://lipdverse.org/wNAm/0_15_0/MiddenCluster8.Harbert.2018.html
MiddenCluster9.Harbert.2018	Midden Cluster 9	North America>Mexico	31.6387	-115.555	782	10.5334/oq.46	10.1038/s41597-020-0445-3	geochange.er.usgs.gov/midden/		Midden							latitude sample	decimal degrees								609	54400	190						http://lipdverse.org/wNAm/0_15_0/MiddenCluster9.Harbert.2018.html
MiddenCluster9.Harbert.2018	Midden Cluster 9	North America>Mexico	31.6387	-115.555	782	10.5334/oq.46	10.1038/s41597-020-0445-3	geochange.er.usgs.gov/midden/		Midden							longitude sample	decimal degrees								609	54400	190						http://lipdverse.org/wNAm/0_15_0/MiddenCluster9.Harbert.2018.html
MiddenCluster9.Harbert.2018	Midden Cluster 9	North America>Mexico	31.6387	-115.555	782	10.5334/oq.46	10.1038/s41597-020-0445-3	geochange.er.usgs.gov/midden/		Midden							elevation sample	m								609	54400	190						http://lipdverse.org/wNAm/0_15_0/MiddenCluster9.Harbert.2018.html
MiddenCluster9.Harbert.2018	Midden Cluster 9	North America>Mexico	31.6387	-115.555	782	10.5334/oq.46	10.1038/s41597-020-0445-3	geochange.er.usgs.gov/midden/		Midden							plotName	unitless										190						http://lipdverse.org/wNAm/0_15_0/MiddenCluster9.Harbert.2018.html
Minucua.Goman.2018	Lago Minucua	North America>Mexico	17.079	-97.609	2510	10.1016/j.quaint.2017.01.027		wNAm		LakeSediment							CodeName	unitless										4.173						http://lipdverse.org/wNAm/0_10_0/Minucua.Goman.2018.html
Minucua.Goman.2018	Lago Minucua	North America>Mexico	17.079	-97.609	2510	10.1016/j.quaint.2017.01.027		wNAm		LakeSediment							LazerProfiler	unitless								-58	4490	4.173	0					http://lipdverse.org/wNAm/0_10_0/Minucua.Goman.2018.html
Minucua.Goman.2018	Lago Minucua	North America>Mexico	17.079	-97.609	2510	10.1016/j.quaint.2017.01.027		wNAm		LakeSediment							Core_number	number								71	4484	1	0					http://lipdverse.org/wNAm/0_10_0/Minucua.Goman.2018.html
Minucua.Goman.2018	Lago Minucua	North America>Mexico	17.079	-97.609	2510	10.1016/j.quaint.2017.01.027		wNAm		LakeSediment							Varve_number	number								71	4484	1	0					http://lipdverse.org/wNAm/0_10_0/Minucua.Goman.2018.html
MooseLake.Clegg.2010	Moose Lake	North America>United States Of America>Alaska	61.3742	-143.599	437	10.1016/j.quascirev.2010.08.001		www.ncdc.noaa.gov/paleo/study/15444		LakeSediment	chironomid						uncertainty									-20.035	6007.66	37.846	1.65901					http://lipdverse.org/wNAm/0_15_0/MooseLake.Clegg.2010.html
MooseLake.Clegg.2010	Moose Lake	North America>United States Of America>Alaska	61.3742	-143.599	437	10.1016/j.quascirev.2010.08.001		www.ncdc.noaa.gov/paleo/study/15444		LakeSediment	chironomid						uncertainty									-20.035	6007.66	37.846	1.65901					http://lipdverse.org/wNAm/0_15_0/MooseLake.Clegg.2010.html
MV0811-14JC.Du.2018	Mv0811-14JC	Pacific Ocean>North Pacific Ocean	34.3	-120	-591	10.1016/j.margeo.2017.11.014		wNAm		MarineSediment							color	unitless										60						http://lipdverse.org/wNAm/0_15_0/MV0811-14JC.Du.2018.html
MV0811-14JC.Du.2018	Mv0811-14JC	Pacific Ocean>North Pacific Ocean	34.3	-120	-591	10.1016/j.margeo.2017.11.014		wNAm		MarineSediment							layer_type	unitless										60						http://lipdverse.org/wNAm/0_15_0/MV0811-14JC.Du.2018.html
MV0811-14JC.Du.2018	Mv0811-14JC	Pacific Ocean>North Pacific Ocean	34.3	-120	-591	10.1016/j.margeo.2017.11.014		wNAm		MarineSediment							uncorrected_depth_top	cm								1912	9065	60	7.96868					http://lipdverse.org/wNAm/0_15_0/MV0811-14JC.Du.2018.html
MV0811-14JC.Du.2018	Mv0811-14JC	Pacific Ocean>North Pacific Ocean	34.3	-120	-591	10.1016/j.margeo.2017.11.014		wNAm		MarineSediment							uncorrected_depth_bot	cm								1912	9065	60	7.96868					http://lipdverse.org/wNAm/0_15_0/MV0811-14JC.Du.2018.html
MV99_PC14.Marchitto.2010	MV99_PC14	Pacific Ocean>North Pacific Ocean	25.2012	-112.717	-541	10.1126/science.1194887		www.ncdc.noaa.gov/paleo/study/10415		MarineSediment							mgca_bulloides	mmol/mol								2221.6	13811.8	41.5	0.920396					http://lipdverse.org/wNAm/0_15_0/MV99_PC14.Marchitto.2010.html
MV99-GC31.Barron.2012	MV99-GC31	Pacific Ocean>North Pacific Ocean	23.4672	-111.599	-705	10.1029/2011PA002235		10.1594/PANGAEA.824830?format=html#download		MarineSediment							CAL	unitless										168.105						http://lipdverse.org/wNAm/0_15_0/MV99-GC31.Barron.2012.html
MV99-GC31.Barron.2012	MV99-GC31	Pacific Ocean>North Pacific Ocean	23.4672	-111.599	-705	10.1029/2011PA002235		10.1594/PANGAEA.824830?format=html#download		MarineSediment							Acinocyclus. curvatulus	unitless								823.715	13633.3	168.105	0.984227					http://lipdverse.org/wNAm/0_15_0/MV99-GC31.Barron.2012.html
MV99-GC31.Barron.2012	MV99-GC31	Pacific Ocean>North Pacific Ocean	23.4672	-111.599	-705	10.1029/2011PA002235		10.1594/PANGAEA.824830?format=html#download		MarineSediment							A. octonarius	unitless								823.715	13633.3	168.105	0.984227					http://lipdverse.org/wNAm/0_15_0/MV99-GC31.Barron.2012.html
MV99-GC31.Barron.2012	MV99-GC31	Pacific Ocean>North Pacific Ocean	23.4672	-111.599	-705	10.1029/2011PA002235		10.1594/PANGAEA.824830?format=html#download		MarineSediment							Actinoptychus spp.	unitless								823.715	13633.3	168.105	0.984227					http://lipdverse.org/wNAm/0_15_0/MV99-GC31.Barron.2012.html
MV99-GC31.Barron.2012	MV99-GC31	Pacific Ocean>North Pacific Ocean	23.4672	-111.599	-705	10.1029/2011PA002235		10.1594/PANGAEA.824830?format=html#download		MarineSediment							Azpeitia nodulifer	unitless								823.715	13633.3	168.105	0.984227					http://lipdverse.org/wNAm/0_15_0/MV99-GC31.Barron.2012.html
MV99-GC31.Barron.2012	MV99-GC31	Pacific Ocean>North Pacific Ocean	23.4672	-111.599	-705	10.1029/2011PA002235		10.1594/PANGAEA.824830?format=html#download		MarineSediment							Az. tabularis	unitless								823.715	13633.3	168.105	0.984227					http://lipdverse.org/wNAm/0_15_0/MV99-GC31.Barron.2012.html
MV99-GC31.Barron.2012	MV99-GC31	Pacific Ocean>North Pacific Ocean	23.4672	-111.599	-705	10.1029/2011PA002235		10.1594/PANGAEA.824830?format=html#download		MarineSediment							Coscinodiscus spp.	unitless								823.715	13633.3	168.105	0.984227					http://lipdverse.org/wNAm/0_15_0/MV99-GC31.Barron.2012.html
MV99-GC31.Barron.2012	MV99-GC31	Pacific Ocean>North Pacific Ocean	23.4672	-111.599	-705	10.1029/2011PA002235		10.1594/PANGAEA.824830?format=html#download		MarineSediment							Cyclotella spp.	unitless								823.715	13633.3	168.105	0.984227					http://lipdverse.org/wNAm/0_15_0/MV99-GC31.Barron.2012.html
MV99-GC31.Barron.2012	MV99-GC31	Pacific Ocean>North Pacific Ocean	23.4672	-111.599	-705	10.1029/2011PA002235		10.1594/PANGAEA.824830?format=html#download		MarineSediment							Hemidiscus cuneiformis	unitless								823.715	13633.3	168.105	0.984227					http://lipdverse.org/wNAm/0_15_0/MV99-GC31.Barron.2012.html
MV99-GC31.Barron.2012	MV99-GC31	Pacific Ocean>North Pacific Ocean	23.4672	-111.599	-705	10.1029/2011PA002235		10.1594/PANGAEA.824830?format=html#download		MarineSediment							Paralia sulcata	unitless								823.715	13633.3	168.105	0.984227					http://lipdverse.org/wNAm/0_15_0/MV99-GC31.Barron.2012.html
MV99-GC31.Barron.2012	MV99-GC31	Pacific Ocean>North Pacific Ocean	23.4672	-111.599	-705	10.1029/2011PA002235		10.1594/PANGAEA.824830?format=html#download		MarineSediment							Roperia tesselata	unitless								823.715	13633.3	168.105	0.984227					http://lipdverse.org/wNAm/0_15_0/MV99-GC31.Barron.2012.html
MV99-GC31.Barron.2012	MV99-GC31	Pacific Ocean>North Pacific Ocean	23.4672	-111.599	-705	10.1029/2011PA002235		10.1594/PANGAEA.824830?format=html#download		MarineSediment							Stephanopyxis spp.	unitless								823.715	13633.3	168.105	0.984227					http://lipdverse.org/wNAm/0_15_0/MV99-GC31.Barron.2012.html
MV99-GC31.Barron.2012	MV99-GC31	Pacific Ocean>North Pacific Ocean	23.4672	-111.599	-705	10.1029/2011PA002235		10.1594/PANGAEA.824830?format=html#download		MarineSediment							Thalassiosira spp.	unitless								823.715	13633.3	168.105	0.984227					http://lipdverse.org/wNAm/0_15_0/MV99-GC31.Barron.2012.html
MV99-GC31.Barron.2012	MV99-GC31	Pacific Ocean>North Pacific Ocean	23.4672	-111.599	-705	10.1029/2011PA002235		10.1594/PANGAEA.824830?format=html#download		MarineSediment	diatom						SumDiatoms	number/cm2		T	upwelling		not specified		negative	823.715	13633.3	168.105	0.984227				defer to BSi%	http://lipdverse.org/wNAm/0_15_0/MV99-GC31.Barron.2012.html
MV99-GC31.Barron.2012	MV99-GC31	Pacific Ocean>North Pacific Ocean	23.4672	-111.599	-705	10.1029/2011PA002235		10.1594/PANGAEA.824830?format=html#download		MarineSediment							Chaetoceros spores	unitless								823.715	13633.3	168.105	0.984227					http://lipdverse.org/wNAm/0_15_0/MV99-GC31.Barron.2012.html
MV99-GC31.Barron.2012	MV99-GC31	Pacific Ocean>North Pacific Ocean	23.4672	-111.599	-705	10.1029/2011PA002235		10.1594/PANGAEA.824830?format=html#download		MarineSediment							CAL	unitless										168						http://lipdverse.org/wNAm/0_15_0/MV99-GC31.Barron.2012.html
MV99-GC31.Barron.2012	MV99-GC31	Pacific Ocean>North Pacific Ocean	23.4672	-111.599	-705	10.1029/2011PA002235		10.1594/PANGAEA.824830?format=html#download		MarineSediment							CAL	unitless										168.105						http://lipdverse.org/wNAm/0_15_0/MV99-GC31.Barron.2012.html
MV99-GC31.Barron.2012	MV99-GC31	Pacific Ocean>North Pacific Ocean	23.4672	-111.599	-705	10.1029/2011PA002235		10.1594/PANGAEA.824830?format=html#download		MarineSediment							LSR (cm/ky)	unitless								823.715	13633.3	168.105	0.984227					http://lipdverse.org/wNAm/0_15_0/MV99-GC31.Barron.2012.html
MV99-GC31.Barron.2012	MV99-GC31	Pacific Ocean>North Pacific Ocean	23.4672	-111.599	-705	10.1029/2011PA002235		10.1594/PANGAEA.824830?format=html#download		MarineSediment							Bulk MAR	unitless								823.715	13633.3	168.105	0.984227					http://lipdverse.org/wNAm/0_15_0/MV99-GC31.Barron.2012.html
MV99-GC31.Barron.2012	MV99-GC31	Pacific Ocean>North Pacific Ocean	23.4672	-111.599	-705	10.1029/2011PA002235		10.1594/PANGAEA.824830?format=html#download		MarineSediment							Al	unitless								823.715	13633.3	168.105	0.984227					http://lipdverse.org/wNAm/0_15_0/MV99-GC31.Barron.2012.html
MV99-GC31.Barron.2012	MV99-GC31	Pacific Ocean>North Pacific Ocean	23.4672	-111.599	-705	10.1029/2011PA002235		10.1594/PANGAEA.824830?format=html#download		MarineSediment							Fe	unitless								823.715	13633.3	168.105	0.984227					http://lipdverse.org/wNAm/0_15_0/MV99-GC31.Barron.2012.html
MV99-GC31.Barron.2012	MV99-GC31	Pacific Ocean>North Pacific Ocean	23.4672	-111.599	-705	10.1029/2011PA002235		10.1594/PANGAEA.824830?format=html#download		MarineSediment							% Mg	unitless								823.715	13633.3	168.105	0.984227					http://lipdverse.org/wNAm/0_15_0/MV99-GC31.Barron.2012.html
MV99-GC31.Barron.2012	MV99-GC31	Pacific Ocean>North Pacific Ocean	23.4672	-111.599	-705	10.1029/2011PA002235		10.1594/PANGAEA.824830?format=html#download		MarineSediment							Na	unitless								823.715	13633.3	168.105	0.984227					http://lipdverse.org/wNAm/0_15_0/MV99-GC31.Barron.2012.html
MV99-GC31.Barron.2012	MV99-GC31	Pacific Ocean>North Pacific Ocean	23.4672	-111.599	-705	10.1029/2011PA002235		10.1594/PANGAEA.824830?format=html#download		MarineSediment							% Ca-detr	unitless								823.715	13633.3	168.105	0.984227					http://lipdverse.org/wNAm/0_15_0/MV99-GC31.Barron.2012.html
MV99-GC31.Barron.2012	MV99-GC31	Pacific Ocean>North Pacific Ocean	23.4672	-111.599	-705	10.1029/2011PA002235		10.1594/PANGAEA.824830?format=html#download		MarineSediment							% Ca-ex	unitless								823.715	13633.3	168.105	0.984227					http://lipdverse.org/wNAm/0_15_0/MV99-GC31.Barron.2012.html
MV99-GC31.Barron.2012	MV99-GC31	Pacific Ocean>North Pacific Ocean	23.4672	-111.599	-705	10.1029/2011PA002235		10.1594/PANGAEA.824830?format=html#download		MarineSediment							% CaCO3-ex	unitless								823.715	13633.3	168.105	0.984227					http://lipdverse.org/wNAm/0_15_0/MV99-GC31.Barron.2012.html
MV99-GC31.Barron.2012	MV99-GC31	Pacific Ocean>North Pacific Ocean	23.4672	-111.599	-705	10.1029/2011PA002235		10.1594/PANGAEA.824830?format=html#download		MarineSediment							% K	unitless								823.715	13633.3	168.105	0.984227					http://lipdverse.org/wNAm/0_15_0/MV99-GC31.Barron.2012.html
MV99-GC31.Barron.2012	MV99-GC31	Pacific Ocean>North Pacific Ocean	23.4672	-111.599	-705	10.1029/2011PA002235		10.1594/PANGAEA.824830?format=html#download		MarineSediment							P	unitless								823.715	13633.3	168.105	0.984227					http://lipdverse.org/wNAm/0_15_0/MV99-GC31.Barron.2012.html
MV99-GC31.Barron.2012	MV99-GC31	Pacific Ocean>North Pacific Ocean	23.4672	-111.599	-705	10.1029/2011PA002235		10.1594/PANGAEA.824830?format=html#download		MarineSediment							% Ti	unitless								823.715	13633.3	168.105	0.984227					http://lipdverse.org/wNAm/0_15_0/MV99-GC31.Barron.2012.html
MV99-GC31.Barron.2012	MV99-GC31	Pacific Ocean>North Pacific Ocean	23.4672	-111.599	-705	10.1029/2011PA002235		10.1594/PANGAEA.824830?format=html#download		MarineSediment							% Mn	unitless								823.715	13633.3	168.105	0.984227					http://lipdverse.org/wNAm/0_15_0/MV99-GC31.Barron.2012.html
MV99-GC31.Barron.2012	MV99-GC31	Pacific Ocean>North Pacific Ocean	23.4672	-111.599	-705	10.1029/2011PA002235		10.1594/PANGAEA.824830?format=html#download		MarineSediment							ppm Mn	unitless								823.715	13633.3	168.105	0.984227					http://lipdverse.org/wNAm/0_15_0/MV99-GC31.Barron.2012.html
MV99-GC31.Barron.2012	MV99-GC31	Pacific Ocean>North Pacific Ocean	23.4672	-111.599	-705	10.1029/2011PA002235		10.1594/PANGAEA.824830?format=html#download		MarineSediment							ppm As	unitless								823.715	13633.3	168.105	0.984227					http://lipdverse.org/wNAm/0_15_0/MV99-GC31.Barron.2012.html
MV99-GC31.Barron.2012	MV99-GC31	Pacific Ocean>North Pacific Ocean	23.4672	-111.599	-705	10.1029/2011PA002235		10.1594/PANGAEA.824830?format=html#download		MarineSediment							ppm Ba	unitless								823.715	13633.3	168.105	0.984227					http://lipdverse.org/wNAm/0_15_0/MV99-GC31.Barron.2012.html
MV99-GC31.Barron.2012	MV99-GC31	Pacific Ocean>North Pacific Ocean	23.4672	-111.599	-705	10.1029/2011PA002235		10.1594/PANGAEA.824830?format=html#download		MarineSediment							ppm Be	unitless								823.715	13633.3	168.105	0.984227					http://lipdverse.org/wNAm/0_15_0/MV99-GC31.Barron.2012.html
MV99-GC31.Barron.2012	MV99-GC31	Pacific Ocean>North Pacific Ocean	23.4672	-111.599	-705	10.1029/2011PA002235		10.1594/PANGAEA.824830?format=html#download		MarineSediment							ppm Cd	unitless								823.715	13633.3	168.105	0.984227					http://lipdverse.org/wNAm/0_15_0/MV99-GC31.Barron.2012.html
MV99-GC31.Barron.2012	MV99-GC31	Pacific Ocean>North Pacific Ocean	23.4672	-111.599	-705	10.1029/2011PA002235		10.1594/PANGAEA.824830?format=html#download		MarineSediment							ppm Co	unitless								823.715	13633.3	168.105	0.984227					http://lipdverse.org/wNAm/0_15_0/MV99-GC31.Barron.2012.html
MV99-GC31.Barron.2012	MV99-GC31	Pacific Ocean>North Pacific Ocean	23.4672	-111.599	-705	10.1029/2011PA002235		10.1594/PANGAEA.824830?format=html#download		MarineSediment							ppm Cr	unitless								823.715	13633.3	168.105	0.984227					http://lipdverse.org/wNAm/0_15_0/MV99-GC31.Barron.2012.html
MV99-GC31.Barron.2012	MV99-GC31	Pacific Ocean>North Pacific Ocean	23.4672	-111.599	-705	10.1029/2011PA002235		10.1594/PANGAEA.824830?format=html#download		MarineSediment							ppm Cu	unitless								823.715	13633.3	168.105	0.984227					http://lipdverse.org/wNAm/0_15_0/MV99-GC31.Barron.2012.html
MV99-GC31.Barron.2012	MV99-GC31	Pacific Ocean>North Pacific Ocean	23.4672	-111.599	-705	10.1029/2011PA002235		10.1594/PANGAEA.824830?format=html#download		MarineSediment							ppm La	unitless								823.715	13633.3	168.105	0.984227					http://lipdverse.org/wNAm/0_15_0/MV99-GC31.Barron.2012.html
MV99-GC31.Barron.2012	MV99-GC31	Pacific Ocean>North Pacific Ocean	23.4672	-111.599	-705	10.1029/2011PA002235		10.1594/PANGAEA.824830?format=html#download		MarineSediment							ppm Mo	unitless								823.715	13633.3	168.105	0.984227					http://lipdverse.org/wNAm/0_15_0/MV99-GC31.Barron.2012.html
MV99-GC31.Barron.2012	MV99-GC31	Pacific Ocean>North Pacific Ocean	23.4672	-111.599	-705	10.1029/2011PA002235		10.1594/PANGAEA.824830?format=html#download		MarineSediment							ppm Ni	unitless								823.715	13633.3	168.105	0.984227					http://lipdverse.org/wNAm/0_15_0/MV99-GC31.Barron.2012.html
MV99-GC31.Barron.2012	MV99-GC31	Pacific Ocean>North Pacific Ocean	23.4672	-111.599	-705	10.1029/2011PA002235		10.1594/PANGAEA.824830?format=html#download		MarineSediment							ppm Pb	unitless								823.715	13633.3	168.105	0.984227					http://lipdverse.org/wNAm/0_15_0/MV99-GC31.Barron.2012.html
MV99-GC31.Barron.2012	MV99-GC31	Pacific Ocean>North Pacific Ocean	23.4672	-111.599	-705	10.1029/2011PA002235		10.1594/PANGAEA.824830?format=html#download		MarineSediment							ppm Sc	unitless								823.715	13633.3	168.105	0.984227					http://lipdverse.org/wNAm/0_15_0/MV99-GC31.Barron.2012.html
MV99-GC31.Barron.2012	MV99-GC31	Pacific Ocean>North Pacific Ocean	23.4672	-111.599	-705	10.1029/2011PA002235		10.1594/PANGAEA.824830?format=html#download		MarineSediment							ppm Sr	unitless								823.715	13633.3	168.105	0.984227					http://lipdverse.org/wNAm/0_15_0/MV99-GC31.Barron.2012.html
MV99-GC31.Barron.2012	MV99-GC31	Pacific Ocean>North Pacific Ocean	23.4672	-111.599	-705	10.1029/2011PA002235		10.1594/PANGAEA.824830?format=html#download		MarineSediment							ppm V	unitless								823.715	13633.3	168.105	0.984227					http://lipdverse.org/wNAm/0_15_0/MV99-GC31.Barron.2012.html
MV99-GC31.Barron.2012	MV99-GC31	Pacific Ocean>North Pacific Ocean	23.4672	-111.599	-705	10.1029/2011PA002235		10.1594/PANGAEA.824830?format=html#download		MarineSediment							ppm Y	unitless								823.715	13633.3	168.105	0.984227					http://lipdverse.org/wNAm/0_15_0/MV99-GC31.Barron.2012.html
MV99-GC31.Barron.2012	MV99-GC31	Pacific Ocean>North Pacific Ocean	23.4672	-111.599	-705	10.1029/2011PA002235		10.1594/PANGAEA.824830?format=html#download		MarineSediment							ppm Zr	unitless								823.715	13633.3	168.105	0.984227					http://lipdverse.org/wNAm/0_15_0/MV99-GC31.Barron.2012.html
MV99-GC31.Barron.2012	MV99-GC31	Pacific Ocean>North Pacific Ocean	23.4672	-111.599	-705	10.1029/2011PA002235		10.1594/PANGAEA.824830?format=html#download		MarineSediment							ppm Zn	unitless								823.715	13633.3	168.105	0.984227					http://lipdverse.org/wNAm/0_15_0/MV99-GC31.Barron.2012.html
MV99-GC31.Barron.2012	MV99-GC31	Pacific Ocean>North Pacific Ocean	23.4672	-111.599	-705	10.1029/2011PA002235		10.1594/PANGAEA.824830?format=html#download		MarineSediment							% TC	unitless								823.715	13633.3	168.105	0.984227					http://lipdverse.org/wNAm/0_15_0/MV99-GC31.Barron.2012.html
MV99-GC31.Barron.2012	MV99-GC31	Pacific Ocean>North Pacific Ocean	23.4672	-111.599	-705	10.1029/2011PA002235		10.1594/PANGAEA.824830?format=html#download		MarineSediment							% IC	unitless								823.715	13633.3	168.105	0.984227					http://lipdverse.org/wNAm/0_15_0/MV99-GC31.Barron.2012.html
MV99-GC31.Barron.2012	MV99-GC31	Pacific Ocean>North Pacific Ocean	23.4672	-111.599	-705	10.1029/2011PA002235		10.1594/PANGAEA.824830?format=html#download		MarineSediment							CaCO3-IC	unitless								823.715	13633.3	168.105	0.984227					http://lipdverse.org/wNAm/0_15_0/MV99-GC31.Barron.2012.html
MV99-GC31.Barron.2012	MV99-GC31	Pacific Ocean>North Pacific Ocean	23.4672	-111.599	-705	10.1029/2011PA002235		10.1594/PANGAEA.824830?format=html#download		MarineSediment							% OC	unitless								823.715	13633.3	168.105	0.984227					http://lipdverse.org/wNAm/0_15_0/MV99-GC31.Barron.2012.html
MV99-GC31.Barron.2012	MV99-GC31	Pacific Ocean>North Pacific Ocean	23.4672	-111.599	-705	10.1029/2011PA002235		10.1594/PANGAEA.824830?format=html#download		MarineSediment							ppm Cd/% Mn	unitless								823.715	13633.3	168.105	0.984227					http://lipdverse.org/wNAm/0_15_0/MV99-GC31.Barron.2012.html
MV99-GC31.Barron.2012	MV99-GC31	Pacific Ocean>North Pacific Ocean	23.4672	-111.599	-705	10.1029/2011PA002235		10.1594/PANGAEA.824830?format=html#download		MarineSediment							ppmBa/%Al	unitless								823.715	13633.3	168.105	0.984227					http://lipdverse.org/wNAm/0_15_0/MV99-GC31.Barron.2012.html
MV99-GC31.Barron.2012	MV99-GC31	Pacific Ocean>North Pacific Ocean	23.4672	-111.599	-705	10.1029/2011PA002235		10.1594/PANGAEA.824830?format=html#download		MarineSediment							OC-MAR (g)	unitless								823.715	13633.3	168.105	0.984227					http://lipdverse.org/wNAm/0_15_0/MV99-GC31.Barron.2012.html
MV99-GC31.Barron.2012	MV99-GC31	Pacific Ocean>North Pacific Ocean	23.4672	-111.599	-705	10.1029/2011PA002235		10.1594/PANGAEA.824830?format=html#download		MarineSediment							OC-MAR (mg)	unitless								823.715	13633.3	168.105	0.984227					http://lipdverse.org/wNAm/0_15_0/MV99-GC31.Barron.2012.html
MV99-GC31.Barron.2012	MV99-GC31	Pacific Ocean>North Pacific Ocean	23.4672	-111.599	-705	10.1029/2011PA002235		10.1594/PANGAEA.824830?format=html#download		MarineSediment							Cd MAR (ug/cm2/ky)	unitless								823.715	13633.3	168.105	0.984227					http://lipdverse.org/wNAm/0_15_0/MV99-GC31.Barron.2012.html
MV99-GC31.Barron.2012	MV99-GC31	Pacific Ocean>North Pacific Ocean	23.4672	-111.599	-705	10.1029/2011PA002235		10.1594/PANGAEA.824830?format=html#download		MarineSediment							Mo MAR (ug/cm2/ky)	unitless								823.715	13633.3	168.105	0.984227					http://lipdverse.org/wNAm/0_15_0/MV99-GC31.Barron.2012.html
MV99-GC31.Barron.2012	MV99-GC31	Pacific Ocean>North Pacific Ocean	23.4672	-111.599	-705	10.1029/2011PA002235		10.1594/PANGAEA.824830?format=html#download		MarineSediment							Mn/Mo	unitless								823.715	13633.3	168.105	0.984227					http://lipdverse.org/wNAm/0_15_0/MV99-GC31.Barron.2012.html
NBJ2015iso.Wong.2015	Natural Bridge Caverns	North America>United States Of America>Texas	29.69	-98.34	304	10.1016/j.quascirev.2015.06.023		wNAm		Speleothem							number	unitless								88.458	7000	35.383						http://lipdverse.org/wNAm/0_15_0/NBJ2015iso.Wong.2015.html
NH-8P.Bhattacharya.2018	Mexican Marin	Pacific Ocean>North Pacific Ocean	22.23	-107.05	-1018	10.1038/s41561-018-0220-7	10.1029/98PA02508	www.ncdc.noaa.gov/paleo/study/24890		MarineSediment							d2H	permil								1460	24266	358.8	0.379507					http://lipdverse.org/wNAm/0_15_0/NH-8P.Bhattacharya.2018.html
NH-8P.Bhattacharya.2018	Mexican Marin	Pacific Ocean>North Pacific Ocean	22.23	-107.05	-1018	10.1038/s41561-018-0220-7	10.1029/98PA02508	www.ncdc.noaa.gov/paleo/study/24890		MarineSediment							d2H	permil		M						1460	24266	358.8	0.379507					http://lipdverse.org/wNAm/0_15_0/NH-8P.Bhattacharya.2018.html
NH-8P.Bhattacharya.2018	Mexican Marin	Pacific Ocean>North Pacific Ocean	22.23	-107.05	-1018	10.1038/s41561-018-0220-7	10.1029/98PA02508	www.ncdc.noaa.gov/paleo/study/24890		MarineSediment							d13C	permil								1460	24266	358.8	0.379507					http://lipdverse.org/wNAm/0_15_0/NH-8P.Bhattacharya.2018.html
NH-8P.Bhattacharya.2018	Mexican Marin	Pacific Ocean>North Pacific Ocean	22.23	-107.05	-1018	10.1038/s41561-018-0220-7	10.1029/98PA02508	www.ncdc.noaa.gov/paleo/study/24890		MarineSediment							JASerror	unitless								1460	24266	358.8	0.379507					http://lipdverse.org/wNAm/0_15_0/NH-8P.Bhattacharya.2018.html
ODP_167_1019C.Barron.2003	ODP_167_1019C	Pacific Ocean>North Pacific Ocean	41.6829	-124.932	-946	10.1029/2002PA000768		10.1594/PANGAEA.841946		MarineSediment							Uk37	unitless								160	14940	130	1.18243					http://lipdverse.org/wNAm/0_15_0/ODP_167_1019C.Barron.2003.html
ODP1019.Barron.2003	ODP1019	Pacific Ocean>North Pacific Ocean	41.682	-124.93	-980	10.1029/2002PA000768		www.ncdc.noaa.gov/paleo/study/5867		MarineSediment							CoreSect1H	unitless								160	14940	120	1.18243					http://lipdverse.org/wNAm/0_15_0/ODP1019.Barron.2003.html
ODP1019.Barron.2003	ODP1019	Pacific Ocean>North Pacific Ocean	41.682	-124.93	-980	10.1029/2002PA000768		www.ncdc.noaa.gov/paleo/study/5867		MarineSediment							Top	unitless								160	14940	120	1.18243					http://lipdverse.org/wNAm/0_15_0/ODP1019.Barron.2003.html
ODP1019.Barron.2003	ODP1019	Pacific Ocean>North Pacific Ocean	41.682	-124.93	-980	10.1029/2002PA000768		www.ncdc.noaa.gov/paleo/study/5867		MarineSediment							Bot	unitless								160	14940	120	1.18243					http://lipdverse.org/wNAm/0_15_0/ODP1019.Barron.2003.html
ODP1019.Barron.2003	ODP1019	Pacific Ocean>North Pacific Ocean	41.682	-124.93	-980	10.1029/2002PA000768		www.ncdc.noaa.gov/paleo/study/5867		MarineSediment	alkenone	UK37	alkenone				temperature	degC	abs	T	sea@surface		annual	annual	positive	160	14940	120	1.18243			LJ	this Temp12k record is superseded by a Bayesian-based calibration;	http://lipdverse.org/wNAm/0_15_0/ODP1019.Barron.2003.html
ODP1019.Barron.2003	ODP1019	Pacific Ocean>North Pacific Ocean	41.682	-124.93	-980	10.1029/2002PA000768		www.ncdc.noaa.gov/paleo/study/5867		MarineSediment							sumUK37	unitless								160	14940	120	1.18243					http://lipdverse.org/wNAm/0_15_0/ODP1019.Barron.2003.html
ODP1019.Barron.2003	ODP1019	Pacific Ocean>North Pacific Ocean	41.682	-124.93	-980	10.1029/2002PA000768		www.ncdc.noaa.gov/paleo/study/5867		MarineSediment							core	unitless										110						http://lipdverse.org/wNAm/0_15_0/ODP1019.Barron.2003.html
ODP1019.Barron.2003	ODP1019	Pacific Ocean>North Pacific Ocean	41.682	-124.93	-980	10.1029/2002PA000768		www.ncdc.noaa.gov/paleo/study/5867		MarineSediment							section	unitless								160	15800	110	1.18243					http://lipdverse.org/wNAm/0_15_0/ODP1019.Barron.2003.html
ODP1019.Barron.2003	ODP1019	Pacific Ocean>North Pacific Ocean	41.682	-124.93	-980	10.1029/2002PA000768		www.ncdc.noaa.gov/paleo/study/5867		MarineSediment							top	unitless								160	15800	110	1.18243					http://lipdverse.org/wNAm/0_15_0/ODP1019.Barron.2003.html
ODP1019.Barron.2003	ODP1019	Pacific Ocean>North Pacific Ocean	41.682	-124.93	-980	10.1029/2002PA000768		www.ncdc.noaa.gov/paleo/study/5867		MarineSediment							bot	unitless								160	15800	110	1.18243					http://lipdverse.org/wNAm/0_15_0/ODP1019.Barron.2003.html
ODP1019.Barron.2003	ODP1019	Pacific Ocean>North Pacific Ocean	41.682	-124.93	-980	10.1029/2002PA000768		www.ncdc.noaa.gov/paleo/study/5867		MarineSediment							sedRate	unitless								160	15800	110	1.18243					http://lipdverse.org/wNAm/0_15_0/ODP1019.Barron.2003.html
ODP1019.Barron.2003	ODP1019	Pacific Ocean>North Pacific Ocean	41.682	-124.93	-980	10.1029/2002PA000768		www.ncdc.noaa.gov/paleo/study/5867		MarineSediment							Corg	unitless								160	15800	110	1.18243					http://lipdverse.org/wNAm/0_15_0/ODP1019.Barron.2003.html
ODP1019.Barron.2003	ODP1019	Pacific Ocean>North Pacific Ocean	41.682	-124.93	-980	10.1029/2002PA000768		www.ncdc.noaa.gov/paleo/study/5867		MarineSediment							CaCO3	unitless								160	15800	110	1.18243					http://lipdverse.org/wNAm/0_15_0/ODP1019.Barron.2003.html
ODP1019.Barron.2003	ODP1019	Pacific Ocean>North Pacific Ocean	41.682	-124.93	-980	10.1029/2002PA000768		www.ncdc.noaa.gov/paleo/study/5867		MarineSediment							WetBD	unitless								160	15800	110	1.18243					http://lipdverse.org/wNAm/0_15_0/ODP1019.Barron.2003.html
ODP1019.Barron.2003	ODP1019	Pacific Ocean>North Pacific Ocean	41.682	-124.93	-980	10.1029/2002PA000768		www.ncdc.noaa.gov/paleo/study/5867		MarineSediment							EstDryBD	unitless								160	15800	110	1.18243					http://lipdverse.org/wNAm/0_15_0/ODP1019.Barron.2003.html
ODP1019.Barron.2003	ODP1019	Pacific Ocean>North Pacific Ocean	41.682	-124.93	-980	10.1029/2002PA000768		www.ncdc.noaa.gov/paleo/study/5867		MarineSediment							bulkMAR	unitless								160	15800	110	1.18243					http://lipdverse.org/wNAm/0_15_0/ODP1019.Barron.2003.html
ODP1019.Barron.2003	ODP1019	Pacific Ocean>North Pacific Ocean	41.682	-124.93	-980	10.1029/2002PA000768		www.ncdc.noaa.gov/paleo/study/5867		MarineSediment							CordMAR	unitless								160	15800	110	1.18243					http://lipdverse.org/wNAm/0_15_0/ODP1019.Barron.2003.html
ODP1019.Barron.2003	ODP1019	Pacific Ocean>North Pacific Ocean	41.682	-124.93	-980	10.1029/2002PA000768		www.ncdc.noaa.gov/paleo/study/5867		MarineSediment							BSi	percent								1180	15800	90	1.2939					http://lipdverse.org/wNAm/0_15_0/ODP1019.Barron.2003.html
ODP1019.Barron.2003	ODP1019	Pacific Ocean>North Pacific Ocean	41.682	-124.93	-980	10.1029/2002PA000768		www.ncdc.noaa.gov/paleo/study/5867		MarineSediment							core_section	unitless										130						http://lipdverse.org/wNAm/0_15_0/ODP1019.Barron.2003.html
ODP1019.Barron.2003	ODP1019	Pacific Ocean>North Pacific Ocean	41.682	-124.93	-980	10.1029/2002PA000768		www.ncdc.noaa.gov/paleo/study/5867		MarineSediment							range	unitless								160	14780	130	1.18243					http://lipdverse.org/wNAm/0_15_0/ODP1019.Barron.2003.html
ODP1019.Barron.2003	ODP1019	Pacific Ocean>North Pacific Ocean	41.682	-124.93	-980	10.1029/2002PA000768		www.ncdc.noaa.gov/paleo/study/5867		MarineSediment							Actinocyclus_curvatulus	percent								160	14780	130	1.18243					http://lipdverse.org/wNAm/0_15_0/ODP1019.Barron.2003.html
ODP1019.Barron.2003	ODP1019	Pacific Ocean>North Pacific Ocean	41.682	-124.93	-980	10.1029/2002PA000768		www.ncdc.noaa.gov/paleo/study/5867		MarineSediment							Azpeitia_nodulifer	percent								160	7750	1860	1.84453					http://lipdverse.org/wNAm/0_15_0/ODP1019.Barron.2003.html
ODP1019.Barron.2003	ODP1019	Pacific Ocean>North Pacific Ocean	41.682	-124.93	-980	10.1029/2002PA000768		www.ncdc.noaa.gov/paleo/study/5867		MarineSediment							A_tabularis	percent								160	14780	130	1.18243					http://lipdverse.org/wNAm/0_15_0/ODP1019.Barron.2003.html
ODP1019.Barron.2003	ODP1019	Pacific Ocean>North Pacific Ocean	41.682	-124.93	-980	10.1029/2002PA000768		www.ncdc.noaa.gov/paleo/study/5867		MarineSediment							Coscinodiscus_radiatus	percent								160	14780	130	1.18243					http://lipdverse.org/wNAm/0_15_0/ODP1019.Barron.2003.html
ODP1019.Barron.2003	ODP1019	Pacific Ocean>North Pacific Ocean	41.682	-124.93	-980	10.1029/2002PA000768		www.ncdc.noaa.gov/paleo/study/5867		MarineSediment							Delphineis	percent								160	14780	130	1.18243					http://lipdverse.org/wNAm/0_15_0/ODP1019.Barron.2003.html
ODP1019.Barron.2003	ODP1019	Pacific Ocean>North Pacific Ocean	41.682	-124.93	-980	10.1029/2002PA000768		www.ncdc.noaa.gov/paleo/study/5867		MarineSediment							Hemidiscus_cuneiformis	percent								160	9240	390	1.54185					http://lipdverse.org/wNAm/0_15_0/ODP1019.Barron.2003.html
ODP1019.Barron.2003	ODP1019	Pacific Ocean>North Pacific Ocean	41.682	-124.93	-980	10.1029/2002PA000768		www.ncdc.noaa.gov/paleo/study/5867		MarineSediment							Neodenticula_seminae	percent								290	14780	130	1.19556					http://lipdverse.org/wNAm/0_15_0/ODP1019.Barron.2003.html
ODP1019.Barron.2003	ODP1019	Pacific Ocean>North Pacific Ocean	41.682	-124.93	-980	10.1029/2002PA000768		www.ncdc.noaa.gov/paleo/study/5867		MarineSediment							Nitzschia_interruptestriata	percent								1210	14780	130	1.2975					http://lipdverse.org/wNAm/0_15_0/ODP1019.Barron.2003.html
ODP1019.Barron.2003	ODP1019	Pacific Ocean>North Pacific Ocean	41.682	-124.93	-980	10.1029/2002PA000768		www.ncdc.noaa.gov/paleo/study/5867		MarineSediment							N_sicula	percent								160	13970	215	1.18243					http://lipdverse.org/wNAm/0_15_0/ODP1019.Barron.2003.html
ODP1019.Barron.2003	ODP1019	Pacific Ocean>North Pacific Ocean	41.682	-124.93	-980	10.1029/2002PA000768		www.ncdc.noaa.gov/paleo/study/5867		MarineSediment							Pseudoeunotia_doliolus	percent								160	13730	130	1.18243					http://lipdverse.org/wNAm/0_15_0/ODP1019.Barron.2003.html
ODP1019.Barron.2003	ODP1019	Pacific Ocean>North Pacific Ocean	41.682	-124.93	-980	10.1029/2002PA000768		www.ncdc.noaa.gov/paleo/study/5867		MarineSediment							Rhizosolenia	percent								160	14380	130	1.18243					http://lipdverse.org/wNAm/0_15_0/ODP1019.Barron.2003.html
ODP1019.Barron.2003	ODP1019	Pacific Ocean>North Pacific Ocean	41.682	-124.93	-980	10.1029/2002PA000768		www.ncdc.noaa.gov/paleo/study/5867		MarineSediment							Roperia_tesselata	percent								160	10770	130	1.31951					http://lipdverse.org/wNAm/0_15_0/ODP1019.Barron.2003.html
ODP1019.Barron.2003	ODP1019	Pacific Ocean>North Pacific Ocean	41.682	-124.93	-980	10.1029/2002PA000768		www.ncdc.noaa.gov/paleo/study/5867		MarineSediment							Stephanopyxis	percent								160	14130	140	1.18243					http://lipdverse.org/wNAm/0_15_0/ODP1019.Barron.2003.html
ODP1019.Barron.2003	ODP1019	Pacific Ocean>North Pacific Ocean	41.682	-124.93	-980	10.1029/2002PA000768		www.ncdc.noaa.gov/paleo/study/5867		MarineSediment							Thalassiosira_excentrica	percent								160	14780	130	1.18243					http://lipdverse.org/wNAm/0_15_0/ODP1019.Barron.2003.html
ODP1019.Barron.2003	ODP1019	Pacific Ocean>North Pacific Ocean	41.682	-124.93	-980	10.1029/2002PA000768		www.ncdc.noaa.gov/paleo/study/5867		MarineSediment							T_oestrupii	percent								160	14780	130	1.18243					http://lipdverse.org/wNAm/0_15_0/ODP1019.Barron.2003.html
ODP1019.Barron.2003	ODP1019	Pacific Ocean>North Pacific Ocean	41.682	-124.93	-980	10.1029/2002PA000768		www.ncdc.noaa.gov/paleo/study/5867		MarineSediment							T_pacifica	percent								160	14780	130	1.18243					http://lipdverse.org/wNAm/0_15_0/ODP1019.Barron.2003.html
ODP1019.Barron.2003	ODP1019	Pacific Ocean>North Pacific Ocean	41.682	-124.93	-980	10.1029/2002PA000768		www.ncdc.noaa.gov/paleo/study/5867		MarineSediment							T_spp	percent								160	14780	130	1.18243					http://lipdverse.org/wNAm/0_15_0/ODP1019.Barron.2003.html
ODP1019.Barron.2003	ODP1019	Pacific Ocean>North Pacific Ocean	41.682	-124.93	-980	10.1029/2002PA000768		www.ncdc.noaa.gov/paleo/study/5867		MarineSediment							Thalassiothrix_longissima	percent								160	14780	130	1.18243					http://lipdverse.org/wNAm/0_15_0/ODP1019.Barron.2003.html
ODP1019.Barron.2003	ODP1019	Pacific Ocean>North Pacific Ocean	41.682	-124.93	-980	10.1029/2002PA000768		www.ncdc.noaa.gov/paleo/study/5867		MarineSediment							Other_planktic	percent								160	14380	130	1.18243					http://lipdverse.org/wNAm/0_15_0/ODP1019.Barron.2003.html
ODP1019.Barron.2003	ODP1019	Pacific Ocean>North Pacific Ocean	41.682	-124.93	-980	10.1029/2002PA000768		www.ncdc.noaa.gov/paleo/study/5867		MarineSediment							Actinoptychus	percent								160	14210	140	1.18243					http://lipdverse.org/wNAm/0_15_0/ODP1019.Barron.2003.html
ODP1019.Barron.2003	ODP1019	Pacific Ocean>North Pacific Ocean	41.682	-124.93	-980	10.1029/2002PA000768		www.ncdc.noaa.gov/paleo/study/5867		MarineSediment							Paralia_sucata	percent								160	13810	350	1.18243					http://lipdverse.org/wNAm/0_15_0/ODP1019.Barron.2003.html
ODP1019.Barron.2003	ODP1019	Pacific Ocean>North Pacific Ocean	41.682	-124.93	-980	10.1029/2002PA000768		www.ncdc.noaa.gov/paleo/study/5867		MarineSediment							Minidiscus?	percent								160	14380	140	1.18243					http://lipdverse.org/wNAm/0_15_0/ODP1019.Barron.2003.html
ODP1019.Barron.2003	ODP1019	Pacific Ocean>North Pacific Ocean	41.682	-124.93	-980	10.1029/2002PA000768		www.ncdc.noaa.gov/paleo/study/5867		MarineSediment							Benthic	percent								160	14780	130	1.18243					http://lipdverse.org/wNAm/0_15_0/ODP1019.Barron.2003.html
ODP1019.Barron.2003	ODP1019	Pacific Ocean>North Pacific Ocean	41.682	-124.93	-980	10.1029/2002PA000768		www.ncdc.noaa.gov/paleo/study/5867		MarineSediment							Freshwater_planktic	percent								160	14780	130	1.18243					http://lipdverse.org/wNAm/0_15_0/ODP1019.Barron.2003.html
ODP1019.Barron.2003	ODP1019	Pacific Ocean>North Pacific Ocean	41.682	-124.93	-980	10.1029/2002PA000768		www.ncdc.noaa.gov/paleo/study/5867		MarineSediment							Reworked	percent								160	13490	470	1.18243					http://lipdverse.org/wNAm/0_15_0/ODP1019.Barron.2003.html
ODP1019.Barron.2003	ODP1019	Pacific Ocean>North Pacific Ocean	41.682	-124.93	-980	10.1029/2002PA000768		www.ncdc.noaa.gov/paleo/study/5867		MarineSediment							total_non_Chaetoceros_counted	unitless								160	14780	130	1.18243					http://lipdverse.org/wNAm/0_15_0/ODP1019.Barron.2003.html
ODP1019.Barron.2003	ODP1019	Pacific Ocean>North Pacific Ocean	41.682	-124.93	-980	10.1029/2002PA000768		www.ncdc.noaa.gov/paleo/study/5867		MarineSediment							Chaetoceros_spores	unitless								160	14780	130	1.18243					http://lipdverse.org/wNAm/0_15_0/ODP1019.Barron.2003.html
ODP1019.Barron.2003	ODP1019	Pacific Ocean>North Pacific Ocean	41.682	-124.93	-980	10.1029/2002PA000768		www.ncdc.noaa.gov/paleo/study/5867		MarineSediment							Diatoms_per_traverse	unitless								160	14780	130	1.18243					http://lipdverse.org/wNAm/0_15_0/ODP1019.Barron.2003.html
ODP1019.Barron.2003	ODP1019	Pacific Ocean>North Pacific Ocean	41.682	-124.93	-980	10.1029/2002PA000768		www.ncdc.noaa.gov/paleo/study/5867		MarineSediment							core_section	unitless										130						http://lipdverse.org/wNAm/0_15_0/ODP1019.Barron.2003.html
ODP1019.Barron.2003	ODP1019	Pacific Ocean>North Pacific Ocean	41.682	-124.93	-980	10.1029/2002PA000768		www.ncdc.noaa.gov/paleo/study/5867		MarineSediment							interval	cm								160	16090	130	1.18243					http://lipdverse.org/wNAm/0_15_0/ODP1019.Barron.2003.html
ODP1019.Barron.2003	ODP1019	Pacific Ocean>North Pacific Ocean	41.682	-124.93	-980	10.1029/2002PA000768		www.ncdc.noaa.gov/paleo/study/5867		MarineSediment							Abies	percent								290	15680	130	1.19556					http://lipdverse.org/wNAm/0_15_0/ODP1019.Barron.2003.html
ODP1019.Barron.2003	ODP1019	Pacific Ocean>North Pacific Ocean	41.682	-124.93	-980	10.1029/2002PA000768		www.ncdc.noaa.gov/paleo/study/5867		MarineSediment							Artemisia	percent								160	16090	130	1.18243					http://lipdverse.org/wNAm/0_15_0/ODP1019.Barron.2003.html
ODP1019.Barron.2003	ODP1019	Pacific Ocean>North Pacific Ocean	41.682	-124.93	-980	10.1029/2002PA000768		www.ncdc.noaa.gov/paleo/study/5867		MarineSediment							Chenopodiacaeae	percent								160	16090	130	1.18243					http://lipdverse.org/wNAm/0_15_0/ODP1019.Barron.2003.html
ODP1019.Barron.2003	ODP1019	Pacific Ocean>North Pacific Ocean	41.682	-124.93	-980	10.1029/2002PA000768		www.ncdc.noaa.gov/paleo/study/5867		MarineSediment							Compositae	percent								160	16090	130	1.18243					http://lipdverse.org/wNAm/0_15_0/ODP1019.Barron.2003.html
ODP1019.Barron.2003	ODP1019	Pacific Ocean>North Pacific Ocean	41.682	-124.93	-980	10.1029/2002PA000768		www.ncdc.noaa.gov/paleo/study/5867		MarineSediment							Cyperaceae	percent								160	16090	140	1.18243					http://lipdverse.org/wNAm/0_15_0/ODP1019.Barron.2003.html
ODP1019.Barron.2003	ODP1019	Pacific Ocean>North Pacific Ocean	41.682	-124.93	-980	10.1029/2002PA000768		www.ncdc.noaa.gov/paleo/study/5867		MarineSediment							Gramineae	percent								160	16090	130	1.18243					http://lipdverse.org/wNAm/0_15_0/ODP1019.Barron.2003.html
ODP1019.Barron.2003	ODP1019	Pacific Ocean>North Pacific Ocean	41.682	-124.93	-980	10.1029/2002PA000768		www.ncdc.noaa.gov/paleo/study/5867		MarineSediment							Picea	percent								290	16090	130	1.19556					http://lipdverse.org/wNAm/0_15_0/ODP1019.Barron.2003.html
ODP1019.Barron.2003	ODP1019	Pacific Ocean>North Pacific Ocean	41.682	-124.93	-980	10.1029/2002PA000768		www.ncdc.noaa.gov/paleo/study/5867		MarineSediment							Pinus	percent								160	16090	130	1.18243					http://lipdverse.org/wNAm/0_15_0/ODP1019.Barron.2003.html
ODP1019.Barron.2003	ODP1019	Pacific Ocean>North Pacific Ocean	41.682	-124.93	-980	10.1029/2002PA000768		www.ncdc.noaa.gov/paleo/study/5867		MarineSediment							Pseudtsuga	percent								290	14920	130	1.19556					http://lipdverse.org/wNAm/0_15_0/ODP1019.Barron.2003.html
ODP1019.Barron.2003	ODP1019	Pacific Ocean>North Pacific Ocean	41.682	-124.93	-980	10.1029/2002PA000768		www.ncdc.noaa.gov/paleo/study/5867		MarineSediment							Quercus	percent								160	16090	130	1.18243					http://lipdverse.org/wNAm/0_15_0/ODP1019.Barron.2003.html
ODP1019.Barron.2003	ODP1019	Pacific Ocean>North Pacific Ocean	41.682	-124.93	-980	10.1029/2002PA000768		www.ncdc.noaa.gov/paleo/study/5867		MarineSediment							RRA	unitless								160	16090	130	1.18243					http://lipdverse.org/wNAm/0_15_0/ODP1019.Barron.2003.html
ODP1019.Barron.2003	ODP1019	Pacific Ocean>North Pacific Ocean	41.682	-124.93	-980	10.1029/2002PA000768		www.ncdc.noaa.gov/paleo/study/5867		MarineSediment							Tsuga_heterophylla	unitless								160	15680	130	1.18243					http://lipdverse.org/wNAm/0_15_0/ODP1019.Barron.2003.html
ODP1019.Barron.2003	ODP1019	Pacific Ocean>North Pacific Ocean	41.682	-124.93	-980	10.1029/2002PA000768		www.ncdc.noaa.gov/paleo/study/5867		MarineSediment							T_mertensianna	unitless								2390	15280	660	1.45682					http://lipdverse.org/wNAm/0_15_0/ODP1019.Barron.2003.html
ODP1019.Barron.2003	ODP1019	Pacific Ocean>North Pacific Ocean	41.682	-124.93	-980	10.1029/2002PA000768		www.ncdc.noaa.gov/paleo/study/5867		MarineSediment							TCT	unitless								160	16090	130	1.18243					http://lipdverse.org/wNAm/0_15_0/ODP1019.Barron.2003.html
ODP1019.Barron.2003	ODP1019	Pacific Ocean>North Pacific Ocean	41.682	-124.93	-980	10.1029/2002PA000768		www.ncdc.noaa.gov/paleo/study/5867		MarineSediment							Total_grains_counted	unitless								160	16090	130	1.18243					http://lipdverse.org/wNAm/0_15_0/ODP1019.Barron.2003.html
ODP1019.Barron.2003	ODP1019	Pacific Ocean>North Pacific Ocean	41.682	-124.93	-980	10.1029/2002PA000768		www.ncdc.noaa.gov/paleo/study/5867		MarineSediment							pollen_grains/gram	unitless								160	16090	130	1.18243					http://lipdverse.org/wNAm/0_15_0/ODP1019.Barron.2003.html
ODP1019.Lopez.2018	ODP1019	Pacific Ocean>North Pacific Ocean	41.683	-124.933	-980	10.1029/2018PA003352		www.ncdc.noaa.gov/paleo/study/24150		MarineSediment							productivity	unitless								31	7244	365.5	1.52502					http://lipdverse.org/wNAm/0_15_0/ODP1019.Lopez.2018.html
OwensLake.Benson.2002	OwensLake	North America>United States Of America>California	36.4367	-117.968	1085	10.1016/S0277-3791(01)00048-8		www.ncdc.noaa.gov/paleo/study/5472		LakeSediment							d13C	permil								1018.28	13516.7	63.14	1.91227					http://lipdverse.org/wNAm/0_15_0/OwensLake.Benson.2002.html
OwensLake.Benson.2002	OwensLake	North America>United States Of America>California	36.4367	-117.968	1085	10.1016/S0277-3791(01)00048-8		www.ncdc.noaa.gov/paleo/study/5472		LakeSediment	TIC						TIC	percent							positive	1018.28	13516.7	63.14	1.91227					http://lipdverse.org/wNAm/0_15_0/OwensLake.Benson.2002.html
OwensLake.Benson.2002	OwensLake	North America>United States Of America>California	36.4367	-117.968	1085	10.1016/S0277-3791(01)00048-8		www.ncdc.noaa.gov/paleo/study/5472		LakeSediment							TOC	percent								1018.28	13516.7	63.14	1.91227					http://lipdverse.org/wNAm/0_15_0/OwensLake.Benson.2002.html
P1B3.deVernal.2005	P1B3	Arctic Ocean	73.683	-162.66	-201	10.1029/2005PA001157		www.ncdc.noaa.gov/paleo/study/15444		MarineSediment							salinity	psu		S	SSS		Summer			125.61	9626	49.9	1.05259					http://lipdverse.org/wNAm/0_15_0/P1B3.deVernal.2005.html
P1B3.deVernal.2005	P1B3	Arctic Ocean	73.683	-162.66	-201	10.1029/2005PA001157		www.ncdc.noaa.gov/paleo/study/15444		MarineSediment							Sea_Ice_conc	0-10		ICE	sea@surface		annual	annual		125.61	9626	49.9	1.05259					http://lipdverse.org/wNAm/0_15_0/P1B3.deVernal.2005.html
P1B3.deVernal.2005	P1B3	Arctic Ocean	73.683	-162.66	-201	10.1029/2005PA001157		www.ncdc.noaa.gov/paleo/study/15444		MarineSediment							productivity	gcm2								125.61	9626	49.9	1.05259					http://lipdverse.org/wNAm/0_15_0/P1B3.deVernal.2005.html
P1B3.deVernal.2005	P1B3	Arctic Ocean	73.683	-162.66	-201	10.1029/2005PA001157		www.ncdc.noaa.gov/paleo/study/15444		MarineSediment							P1	unitless								125.61	9626	49.9	1.05259					http://lipdverse.org/wNAm/0_15_0/P1B3.deVernal.2005.html
Pixie.Brown.2002	Pixie	North America>Canada>British Columbia	48.6	-124.2	70	10.1139/X01-197	10.1038/nature25464	www.ncdc.noaa.gov/paleo/study/27330	10.21233/N3C36R	LakeSediment	pollen			MAT			precipitation	mm		P	@surface		annual	annual		19	10754	144	0.558919			CR, JM	Duplicated by Brown et al., 2006 below	http://lipdverse.org/wNAm/0_15_0/Pixie.Brown.2002.html
PixieLake.Brown.2006	Pixie Lake	North America>Canada>British Columbia	48.6	-124.2	67	10.1016/j.quascirev.2006.02.020		wNAm	10.21233/N3C36R	LakeSediment							DWHI	unitless								-44	11974	145.5	0.58246					http://lipdverse.org/wNAm/0_15_0/PixieLake.Brown.2006.html
PixieLake.Brown.2006	Pixie Lake	North America>Canada>British Columbia	48.6	-124.2	67	10.1016/j.quascirev.2006.02.020		wNAm	10.21233/N3C36R	LakeSediment							MAP	mm								-44	11974	145.5	0.58246					http://lipdverse.org/wNAm/0_15_0/PixieLake.Brown.2006.html
PyramidLake.Benson.2001	Pyramid Lake	North America>United States Of America>Nevada	40.072	-119.584	1156	10.1016/S0277-3791(01)00048-8		https://www.ncdc.noaa.gov/paleo/study/5472		LakeSediment							core	unitless										8						http://lipdverse.org/wNAm/0_15_0/PyramidLake.Benson.2001.html
PyramidLake.Benson.2001	Pyramid Lake	North America>United States Of America>Nevada	40.072	-119.584	1156	10.1016/S0277-3791(01)00048-8		https://www.ncdc.noaa.gov/paleo/study/5472		LakeSediment							compositeDepth	unitless								108	7629.89	8	3.98836					http://lipdverse.org/wNAm/0_15_0/PyramidLake.Benson.2001.html
PyramidLake.Benson.2001	Pyramid Lake	North America>United States Of America>Nevada	40.072	-119.584	1156	10.1016/S0277-3791(01)00048-8		https://www.ncdc.noaa.gov/paleo/study/5472		LakeSediment							calibrated	unitless										8						http://lipdverse.org/wNAm/0_15_0/PyramidLake.Benson.2001.html
PyramidLake.Benson.2001	Pyramid Lake	North America>United States Of America>Nevada	40.072	-119.584	1156	10.1016/S0277-3791(01)00048-8		https://www.ncdc.noaa.gov/paleo/study/5472		LakeSediment							TOC	unitless								108	7629.89	8	3.98836					http://lipdverse.org/wNAm/0_15_0/PyramidLake.Benson.2001.html
PyramidLake.Benson.2001	Pyramid Lake	North America>United States Of America>Nevada	40.072	-119.584	1156	10.1016/S0277-3791(01)00048-8		https://www.ncdc.noaa.gov/paleo/study/5472		LakeSediment							TIC	unitless								108	7629.89	8	3.98836					http://lipdverse.org/wNAm/0_15_0/PyramidLake.Benson.2001.html
PyramidLake.Benson.2001	Pyramid Lake	North America>United States Of America>Nevada	40.072	-119.584	1156	10.1016/S0277-3791(01)00048-8		https://www.ncdc.noaa.gov/paleo/study/5472		LakeSediment							TOTC	unitless								108	7629.89	8	3.98836					http://lipdverse.org/wNAm/0_15_0/PyramidLake.Benson.2001.html
PyramidLake.Benson.2001	Pyramid Lake	North America>United States Of America>Nevada	40.072	-119.584	1156	10.1016/S0277-3791(01)00048-8		https://www.ncdc.noaa.gov/paleo/study/5472		LakeSediment							d13C	permil								108	7629.89	8	3.98836					http://lipdverse.org/wNAm/0_15_0/PyramidLake.Benson.2001.html
Quartz.Wooller.2012	Quartz Lake	North America>United States Of America>Alaska	64.206	-145.814	293	10.1007/s10933-012-9610-9	10.5194/cp-10-1605-2014	www.ncdc.noaa.gov/paleo/study/15444		LakeSediment							error	degC								777	10949	193.5	1.37633					http://lipdverse.org/wNAm/0_15_0/Quartz.Wooller.2012.html
RainbowLake.Shuman.2016	Rainbow Lake	North America>United States Of America>Wyoming	44.94	-109.5	2960	10.1016/j.quascirev.2016.03.009		wNAm		LakeSediment							MaxElevM	m								50	17900	50						http://lipdverse.org/wNAm/0_15_0/RainbowLake.Shuman.2016.html
RainbowLake.Shuman.2016	Rainbow Lake	North America>United States Of America>Wyoming	44.94	-109.5	2960	10.1016/j.quascirev.2016.03.009		wNAm		LakeSediment							MinElevM	m								50	17900	50						http://lipdverse.org/wNAm/0_15_0/RainbowLake.Shuman.2016.html
Ranger.Brubaker.1983	Ranger Lake	North America>United States Of America>Alaska	67.15	-153.65	820	10.1016/0033-5894(83)90077-7		www.ncdc.noaa.gov/paleo/study/15444	10.21233/N31659	LakeSediment	pollen	assemblage		MAT			precipitation	mm		P	((( amount ))) amount@surface /// precip@surface		annual	annual	positive	0	35525	323	0.416667					http://lipdverse.org/wNAm/0_15_0/Ranger.Brubaker.1983.html
RantinLake.Pompeani.2012	Rantin Lake	North America>Canada>Yukon Territory	60.0296	-129.032	720	10.1007/s10933-012-9602-9		www.ncdc.noaa.gov/paleo/study/13095		LakeSediment							topDepth	cm								3108	10940	30	1.53218					http://lipdverse.org/wNAm/0_15_0/RantinLake.Pompeani.2012.html
RantinLake.Pompeani.2012	Rantin Lake	North America>Canada>Yukon Territory	60.0296	-129.032	720	10.1007/s10933-012-9602-9		www.ncdc.noaa.gov/paleo/study/13095		LakeSediment							bottomDepth	cm								3108	10940	30	1.53218					http://lipdverse.org/wNAm/0_15_0/RantinLake.Pompeani.2012.html
RantinLake.Pompeani.2012	Rantin Lake	North America>Canada>Yukon Territory	60.0296	-129.032	720	10.1007/s10933-012-9602-9		www.ncdc.noaa.gov/paleo/study/13095		LakeSediment	TOC						TOC	percent								3108	10940	30	1.53218					http://lipdverse.org/wNAm/0_15_0/RantinLake.Pompeani.2012.html
RantinLake.Pompeani.2012	Rantin Lake	North America>Canada>Yukon Territory	60.0296	-129.032	720	10.1007/s10933-012-9602-9		www.ncdc.noaa.gov/paleo/study/13095		LakeSediment							DBD	g/cm3								3108	10940	30	1.53218					http://lipdverse.org/wNAm/0_15_0/RantinLake.Pompeani.2012.html
RhamnusLake.Brown.2006	Rhamnus Lake	North America>Canada>British Columbia	48.63	-123.72	324	10.1016/j.quascirev.2006.02.020		wNAm		LakeSediment							DWHI	unitless								-40	11059	176	0.540589			CR		http://lipdverse.org/wNAm/0_15_0/RhamnusLake.Brown.2006.html
RhamnusLake.Brown.2006	Rhamnus Lake	North America>Canada>British Columbia	48.63	-123.72	324	10.1016/j.quascirev.2006.02.020		wNAm		LakeSediment							MAP	mm		M						-40	11059	176	0.540589			CR	Original calibration. Updated record has been included.	http://lipdverse.org/wNAm/0_15_0/RhamnusLake.Brown.2006.html
SanJuanRiverDischarge.Brown.2015	San Juan River Discharge	North America>Canada>British Columbia	48.58	-124.31	0	10.1016/j.yqres.2015.03.003		wNAm		LakeSediment	pollen	assemblage				streamflow	Jan	mm		M	flow@surface		1		positive	0	10000	250						http://lipdverse.org/wNAm/0_15_0/SanJuanRiverDischarge.Brown.2015.html
SanJuanRiverDischarge.Brown.2015	San Juan River Discharge	North America>Canada>British Columbia	48.58	-124.31	0	10.1016/j.yqres.2015.03.003		wNAm		LakeSediment	pollen	assemblage				streamflow	Feb	mm		M	flow@surface		2		positive	0	10000	250						http://lipdverse.org/wNAm/0_15_0/SanJuanRiverDischarge.Brown.2015.html
SanJuanRiverDischarge.Brown.2015	San Juan River Discharge	North America>Canada>British Columbia	48.58	-124.31	0	10.1016/j.yqres.2015.03.003		wNAm		LakeSediment	pollen	assemblage				streamflow	MAR	mm		M	flow@surface		3		positive	0	10000	250						http://lipdverse.org/wNAm/0_15_0/SanJuanRiverDischarge.Brown.2015.html
SanJuanRiverDischarge.Brown.2015	San Juan River Discharge	North America>Canada>British Columbia	48.58	-124.31	0	10.1016/j.yqres.2015.03.003		wNAm		LakeSediment	pollen	assemblage				streamflow	APR	mm		M	flow@surface		4		positive	0	10000	250						http://lipdverse.org/wNAm/0_15_0/SanJuanRiverDischarge.Brown.2015.html
SanJuanRiverDischarge.Brown.2015	San Juan River Discharge	North America>Canada>British Columbia	48.58	-124.31	0	10.1016/j.yqres.2015.03.003		wNAm		LakeSediment	pollen	assemblage				streamflow	MAY	mm		M	flow@surface		5		positive	0	10000	250						http://lipdverse.org/wNAm/0_15_0/SanJuanRiverDischarge.Brown.2015.html
SanJuanRiverDischarge.Brown.2015	San Juan River Discharge	North America>Canada>British Columbia	48.58	-124.31	0	10.1016/j.yqres.2015.03.003		wNAm		LakeSediment	pollen	assemblage				streamflow	JUN	mm		M	flow@surface		6		positive	0	10000	250						http://lipdverse.org/wNAm/0_15_0/SanJuanRiverDischarge.Brown.2015.html
SanJuanRiverDischarge.Brown.2015	San Juan River Discharge	North America>Canada>British Columbia	48.58	-124.31	0	10.1016/j.yqres.2015.03.003		wNAm		LakeSediment	pollen	assemblage				streamflow	JUL	mm		M	flow@surface		7		positive	0	10000	250						http://lipdverse.org/wNAm/0_15_0/SanJuanRiverDischarge.Brown.2015.html
SanJuanRiverDischarge.Brown.2015	San Juan River Discharge	North America>Canada>British Columbia	48.58	-124.31	0	10.1016/j.yqres.2015.03.003		wNAm		LakeSediment	pollen	assemblage				streamflow	AUG	mm		M	flow@surface		8		positive	0	10000	250						http://lipdverse.org/wNAm/0_15_0/SanJuanRiverDischarge.Brown.2015.html
SanJuanRiverDischarge.Brown.2015	San Juan River Discharge	North America>Canada>British Columbia	48.58	-124.31	0	10.1016/j.yqres.2015.03.003		wNAm		LakeSediment	pollen	assemblage				streamflow	SEP	mm		M	flow@surface		9		positive	0	10000	250						http://lipdverse.org/wNAm/0_15_0/SanJuanRiverDischarge.Brown.2015.html
SanJuanRiverDischarge.Brown.2015	San Juan River Discharge	North America>Canada>British Columbia	48.58	-124.31	0	10.1016/j.yqres.2015.03.003		wNAm		LakeSediment	pollen	assemblage				streamflow	OCT	mm		M	flow@surface		10		positive	0	10000	250						http://lipdverse.org/wNAm/0_15_0/SanJuanRiverDischarge.Brown.2015.html
SanJuanRiverDischarge.Brown.2015	San Juan River Discharge	North America>Canada>British Columbia	48.58	-124.31	0	10.1016/j.yqres.2015.03.003		wNAm		LakeSediment	pollen	assemblage				streamflow	NOV	mm		M	flow@surface		11		positive	0	10000	250						http://lipdverse.org/wNAm/0_15_0/SanJuanRiverDischarge.Brown.2015.html
SanJuanRiverDischarge.Brown.2015	San Juan River Discharge	North America>Canada>British Columbia	48.58	-124.31	0	10.1016/j.yqres.2015.03.003		wNAm		LakeSediment	pollen	assemblage				streamflow	DEC	mm		M	flow@surface		12		positive	0	10000	250						http://lipdverse.org/wNAm/0_15_0/SanJuanRiverDischarge.Brown.2015.html
SilverLake.Kirby.2015	Silver Lake	North America>United States Of America>California	35.3669	-116.135	277	10.1016/j.yqres.2015.07.003		www.ncdc.noaa.gov/paleo/study/20106		LakeSediment							silt	percent								1521.2	14826.1	40.9	0.668015					http://lipdverse.org/wNAm/0_15_0/SilverLake.Kirby.2015.html
SouthernCalifornia.Ohlwein.2012	Southern California	North America>United States Of America>California	33.7689	-116.66	2399	10.1016/j.quascirev.2011.11.002		www.ncdc.noaa.gov/paleo/study/27330	15594, 15494	Peat	pollen						Tanom	degC		T	air@surface				positive	10469	11446	169	7.16479			DSK	previously marked as "annual", but probably not	http://lipdverse.org/wNAm/0_15_0/SouthernCalifornia.Ohlwein.2012.html
SouthernCalifornia.Ohlwein.2012	Southern California	North America>United States Of America>California	33.7689	-116.66	2399	10.1016/j.quascirev.2011.11.002		www.ncdc.noaa.gov/paleo/study/27330	15594, 15494	Peat							T-SD	degC								10469	11446	169	7.16479					http://lipdverse.org/wNAm/0_15_0/SouthernCalifornia.Ohlwein.2012.html
SouthernCalifornia.Ohlwein.2012	Southern California	North America>United States Of America>California	33.7689	-116.66	2399	10.1016/j.quascirev.2011.11.002		www.ncdc.noaa.gov/paleo/study/27330	15594, 15494	Peat							T+SD	degC								10469	11446	169	7.16479					http://lipdverse.org/wNAm/0_15_0/SouthernCalifornia.Ohlwein.2012.html
SouthernCalifornia.Ohlwein.2012	Southern California	North America>United States Of America>California	33.7689	-116.66	2399	10.1016/j.quascirev.2011.11.002		www.ncdc.noaa.gov/paleo/study/27330	15594, 15494	Peat	pollen						Panom	cm		M	precip@surface		annual	annual	positive	10469	11446	169	7.16479				fails duration	http://lipdverse.org/wNAm/0_15_0/SouthernCalifornia.Ohlwein.2012.html
SouthernCalifornia.Ohlwein.2012	Southern California	North America>United States Of America>California	33.7689	-116.66	2399	10.1016/j.quascirev.2011.11.002		www.ncdc.noaa.gov/paleo/study/27330	15594, 15494	Peat							p-SD	cm								10469	11446	169	7.16479					http://lipdverse.org/wNAm/0_15_0/SouthernCalifornia.Ohlwein.2012.html
SouthernCalifornia.Ohlwein.2012	Southern California	North America>United States Of America>California	33.7689	-116.66	2399	10.1016/j.quascirev.2011.11.002		www.ncdc.noaa.gov/paleo/study/27330	15594, 15494	Peat							p+SD	cm								10469	11446	169	7.16479					http://lipdverse.org/wNAm/0_15_0/SouthernCalifornia.Ohlwein.2012.html
SouthernCalifornia.Ohlwein.2012	Southern California	North America>United States Of America>California	33.7689	-116.66	2399	10.1016/j.quascirev.2011.11.002		www.ncdc.noaa.gov/paleo/study/27330	15594, 15494	Peat							CoreSite											169						http://lipdverse.org/wNAm/0_15_0/SouthernCalifornia.Ohlwein.2012.html
SouthernCalifornia.Ohlwein.2012	Southern California	North America>United States Of America>California	33.7689	-116.66	2399	10.1016/j.quascirev.2011.11.002		www.ncdc.noaa.gov/paleo/study/27330	15594, 15494	Peat	pollen						Tanom	degC		T	air@surface				positive	408	9276	380	0.789355			DSK	previously marked as "annual", but probably not	http://lipdverse.org/wNAm/0_15_0/SouthernCalifornia.Ohlwein.2012.html
SouthernCalifornia.Ohlwein.2012	Southern California	North America>United States Of America>California	33.7689	-116.66	2399	10.1016/j.quascirev.2011.11.002		www.ncdc.noaa.gov/paleo/study/27330	15594, 15494	Peat							T-SD	degC								408	9276	380	0.789355					http://lipdverse.org/wNAm/0_15_0/SouthernCalifornia.Ohlwein.2012.html
SouthernCalifornia.Ohlwein.2012	Southern California	North America>United States Of America>California	33.7689	-116.66	2399	10.1016/j.quascirev.2011.11.002		www.ncdc.noaa.gov/paleo/study/27330	15594, 15494	Peat							T+SD	degC								408	9276	380	0.789355					http://lipdverse.org/wNAm/0_15_0/SouthernCalifornia.Ohlwein.2012.html
SouthernCalifornia.Ohlwein.2012	Southern California	North America>United States Of America>California	33.7689	-116.66	2399	10.1016/j.quascirev.2011.11.002		www.ncdc.noaa.gov/paleo/study/27330	15594, 15494	Peat	pollen						Panom	cm		M	precip@surface		annual	annual	positive	408	9276	380	0.789355					http://lipdverse.org/wNAm/0_15_0/SouthernCalifornia.Ohlwein.2012.html
SouthernCalifornia.Ohlwein.2012	Southern California	North America>United States Of America>California	33.7689	-116.66	2399	10.1016/j.quascirev.2011.11.002		www.ncdc.noaa.gov/paleo/study/27330	15594, 15494	Peat							p-SD	cm								408	9276	380	0.789355					http://lipdverse.org/wNAm/0_15_0/SouthernCalifornia.Ohlwein.2012.html
SouthernCalifornia.Ohlwein.2012	Southern California	North America>United States Of America>California	33.7689	-116.66	2399	10.1016/j.quascirev.2011.11.002		www.ncdc.noaa.gov/paleo/study/27330	15594, 15494	Peat							p+SD	cm								408	9276	380	0.789355					http://lipdverse.org/wNAm/0_15_0/SouthernCalifornia.Ohlwein.2012.html
SouthernCalifornia.Ohlwein.2012	Southern California	North America>United States Of America>California	33.7689	-116.66	2399	10.1016/j.quascirev.2011.11.002		www.ncdc.noaa.gov/paleo/study/27330	15594, 15494	Peat							CoreSite											380						http://lipdverse.org/wNAm/0_15_0/SouthernCalifornia.Ohlwein.2012.html
SouthernCalifornia.Ohlwein.2012	Southern California	North America>United States Of America>California	33.7689	-116.66	2399	10.1016/j.quascirev.2011.11.002		www.ncdc.noaa.gov/paleo/study/27330	15594, 15494	Peat							core											352						http://lipdverse.org/wNAm/0_15_0/SouthernCalifornia.Ohlwein.2012.html
SouthernCalifornia.Ohlwein.2012	Southern California	North America>United States Of America>California	33.7689	-116.66	2399	10.1016/j.quascirev.2011.11.002		www.ncdc.noaa.gov/paleo/study/27330	15594, 15494	Peat							T-SD	degC								408	11446	352	0.634173					http://lipdverse.org/wNAm/0_15_0/SouthernCalifornia.Ohlwein.2012.html
SouthernCalifornia.Ohlwein.2012	Southern California	North America>United States Of America>California	33.7689	-116.66	2399	10.1016/j.quascirev.2011.11.002		www.ncdc.noaa.gov/paleo/study/27330	15594, 15494	Peat							T+SD	degC								408	11446	352	0.634173					http://lipdverse.org/wNAm/0_15_0/SouthernCalifornia.Ohlwein.2012.html
SouthernCalifornia.Ohlwein.2012	Southern California	North America>United States Of America>California	33.7689	-116.66	2399	10.1016/j.quascirev.2011.11.002		www.ncdc.noaa.gov/paleo/study/27330	15594, 15494	Peat							P-SD	cm								408	11446	352	0.634173					http://lipdverse.org/wNAm/0_15_0/SouthernCalifornia.Ohlwein.2012.html
SouthernCalifornia.Ohlwein.2012	Southern California	North America>United States Of America>California	33.7689	-116.66	2399	10.1016/j.quascirev.2011.11.002		www.ncdc.noaa.gov/paleo/study/27330	15594, 15494	Peat							P+SD	cm								408	11446	352	0.634173					http://lipdverse.org/wNAm/0_15_0/SouthernCalifornia.Ohlwein.2012.html
Station803.Bringue.2012	Station 803	Arctic Ocean>Beaufort Sea	70.6328	-135.88	-218	10.1016/j.margeo.2011.11.004	10.1016/j.quascirev.2013.07.006	www.ncdc.noaa.gov/paleo/study/27910		MarineSediment							depth-range	cm										70.7						http://lipdverse.org/wNAm/0_15_0/Station803.Bringue.2012.html
Station803.Bringue.2012	Station 803	Arctic Ocean>Beaufort Sea	70.6328	-135.88	-218	10.1016/j.margeo.2011.11.004	10.1016/j.quascirev.2013.07.006	www.ncdc.noaa.gov/paleo/study/27910		MarineSediment							TFEV_i									256.45	4589.6	70.7	0.923116					http://lipdverse.org/wNAm/0_15_0/Station803.Bringue.2012.html
Station803.Bringue.2012	Station 803	Arctic Ocean>Beaufort Sea	70.6328	-135.88	-218	10.1016/j.margeo.2011.11.004	10.1016/j.quascirev.2013.07.006	www.ncdc.noaa.gov/paleo/study/27910		MarineSediment							TFEV									256.45	4589.6	70.7	0.923116					http://lipdverse.org/wNAm/0_15_0/Station803.Bringue.2012.html
Station803.Bringue.2012	Station 803	Arctic Ocean>Beaufort Sea	70.6328	-135.88	-218	10.1016/j.margeo.2011.11.004	10.1016/j.quascirev.2013.07.006	www.ncdc.noaa.gov/paleo/study/27910		MarineSediment							TFEV_s									256.45	4589.6	70.7	0.923116					http://lipdverse.org/wNAm/0_15_0/Station803.Bringue.2012.html
Station803.Bringue.2012	Station 803	Arctic Ocean>Beaufort Sea	70.6328	-135.88	-218	10.1016/j.margeo.2011.11.004	10.1016/j.quascirev.2013.07.006	www.ncdc.noaa.gov/paleo/study/27910		MarineSediment							TFEV/3									327.13	4540.2	70.7	0.949426					http://lipdverse.org/wNAm/0_15_0/Station803.Bringue.2012.html
Station803.Bringue.2012	Station 803	Arctic Ocean>Beaufort Sea	70.6328	-135.88	-218	10.1016/j.margeo.2011.11.004	10.1016/j.quascirev.2013.07.006	www.ncdc.noaa.gov/paleo/study/27910		MarineSediment							SFEV_i									256.45	4589.6	70.7	0.923116					http://lipdverse.org/wNAm/0_15_0/Station803.Bringue.2012.html
Station803.Bringue.2012	Station 803	Arctic Ocean>Beaufort Sea	70.6328	-135.88	-218	10.1016/j.margeo.2011.11.004	10.1016/j.quascirev.2013.07.006	www.ncdc.noaa.gov/paleo/study/27910		MarineSediment							SFEV									256.45	4589.6	70.7	0.923116					http://lipdverse.org/wNAm/0_15_0/Station803.Bringue.2012.html
Station803.Bringue.2012	Station 803	Arctic Ocean>Beaufort Sea	70.6328	-135.88	-218	10.1016/j.margeo.2011.11.004	10.1016/j.quascirev.2013.07.006	www.ncdc.noaa.gov/paleo/study/27910		MarineSediment							SFEV_s									256.45	4589.6	70.7	0.923116					http://lipdverse.org/wNAm/0_15_0/Station803.Bringue.2012.html
Station803.Bringue.2012	Station 803	Arctic Ocean>Beaufort Sea	70.6328	-135.88	-218	10.1016/j.margeo.2011.11.004	10.1016/j.quascirev.2013.07.006	www.ncdc.noaa.gov/paleo/study/27910		MarineSediment							SFEV/3									327.13	4540.2	70.7	0.949426					http://lipdverse.org/wNAm/0_15_0/Station803.Bringue.2012.html
Station803.Bringue.2012	Station 803	Arctic Ocean>Beaufort Sea	70.6328	-135.88	-218	10.1016/j.margeo.2011.11.004	10.1016/j.quascirev.2013.07.006	www.ncdc.noaa.gov/paleo/study/27910		MarineSediment							THIV_i									256.45	4589.6	70.7	0.923116					http://lipdverse.org/wNAm/0_15_0/Station803.Bringue.2012.html
Station803.Bringue.2012	Station 803	Arctic Ocean>Beaufort Sea	70.6328	-135.88	-218	10.1016/j.margeo.2011.11.004	10.1016/j.quascirev.2013.07.006	www.ncdc.noaa.gov/paleo/study/27910		MarineSediment							THIV									256.45	4589.6	70.7	0.923116					http://lipdverse.org/wNAm/0_15_0/Station803.Bringue.2012.html
Station803.Bringue.2012	Station 803	Arctic Ocean>Beaufort Sea	70.6328	-135.88	-218	10.1016/j.margeo.2011.11.004	10.1016/j.quascirev.2013.07.006	www.ncdc.noaa.gov/paleo/study/27910		MarineSediment							THIV_s									256.45	4589.6	70.7	0.923116					http://lipdverse.org/wNAm/0_15_0/Station803.Bringue.2012.html
Station803.Bringue.2012	Station 803	Arctic Ocean>Beaufort Sea	70.6328	-135.88	-218	10.1016/j.margeo.2011.11.004	10.1016/j.quascirev.2013.07.006	www.ncdc.noaa.gov/paleo/study/27910		MarineSediment							THIV/3									327.13	4540.2	70.7	0.949426					http://lipdverse.org/wNAm/0_15_0/Station803.Bringue.2012.html
Station803.Bringue.2012	Station 803	Arctic Ocean>Beaufort Sea	70.6328	-135.88	-218	10.1016/j.margeo.2011.11.004	10.1016/j.quascirev.2013.07.006	www.ncdc.noaa.gov/paleo/study/27910		MarineSediment							SHIV_i									256.45	4589.6	70.7	0.923116					http://lipdverse.org/wNAm/0_15_0/Station803.Bringue.2012.html
Station803.Bringue.2012	Station 803	Arctic Ocean>Beaufort Sea	70.6328	-135.88	-218	10.1016/j.margeo.2011.11.004	10.1016/j.quascirev.2013.07.006	www.ncdc.noaa.gov/paleo/study/27910		MarineSediment							SHIV									256.45	4589.6	70.7	0.923116					http://lipdverse.org/wNAm/0_15_0/Station803.Bringue.2012.html
Station803.Bringue.2012	Station 803	Arctic Ocean>Beaufort Sea	70.6328	-135.88	-218	10.1016/j.margeo.2011.11.004	10.1016/j.quascirev.2013.07.006	www.ncdc.noaa.gov/paleo/study/27910		MarineSediment							SHIV_s									256.45	4589.6	70.7	0.923116					http://lipdverse.org/wNAm/0_15_0/Station803.Bringue.2012.html
Station803.Bringue.2012	Station 803	Arctic Ocean>Beaufort Sea	70.6328	-135.88	-218	10.1016/j.margeo.2011.11.004	10.1016/j.quascirev.2013.07.006	www.ncdc.noaa.gov/paleo/study/27910		MarineSediment							SHIV/3									327.13	4540.2	70.7	0.949426					http://lipdverse.org/wNAm/0_15_0/Station803.Bringue.2012.html
Station803.Bringue.2012	Station 803	Arctic Ocean>Beaufort Sea	70.6328	-135.88	-218	10.1016/j.margeo.2011.11.004	10.1016/j.quascirev.2013.07.006	www.ncdc.noaa.gov/paleo/study/27910		MarineSediment							temperature			T						256.45	4589.6	70.7	0.923116					http://lipdverse.org/wNAm/0_15_0/Station803.Bringue.2012.html
Station803.Bringue.2012	Station 803	Arctic Ocean>Beaufort Sea	70.6328	-135.88	-218	10.1016/j.margeo.2011.11.004	10.1016/j.quascirev.2013.07.006	www.ncdc.noaa.gov/paleo/study/27910		MarineSediment							temperature			T						256.45	4589.6	70.7	0.923116					http://lipdverse.org/wNAm/0_15_0/Station803.Bringue.2012.html
Station803.Bringue.2012	Station 803	Arctic Ocean>Beaufort Sea	70.6328	-135.88	-218	10.1016/j.margeo.2011.11.004	10.1016/j.quascirev.2013.07.006	www.ncdc.noaa.gov/paleo/study/27910		MarineSediment							temperature			T						327.13	4540.2	70.7	0.949426					http://lipdverse.org/wNAm/0_15_0/Station803.Bringue.2012.html
Station803.Bringue.2012	Station 803	Arctic Ocean>Beaufort Sea	70.6328	-135.88	-218	10.1016/j.margeo.2011.11.004	10.1016/j.quascirev.2013.07.006	www.ncdc.noaa.gov/paleo/study/27910		MarineSediment							SAUG_i									256.45	4589.6	70.7	0.923116					http://lipdverse.org/wNAm/0_15_0/Station803.Bringue.2012.html
Station803.Bringue.2012	Station 803	Arctic Ocean>Beaufort Sea	70.6328	-135.88	-218	10.1016/j.margeo.2011.11.004	10.1016/j.quascirev.2013.07.006	www.ncdc.noaa.gov/paleo/study/27910		MarineSediment							SAUG									256.45	4589.6	70.7	0.923116					http://lipdverse.org/wNAm/0_15_0/Station803.Bringue.2012.html
Station803.Bringue.2012	Station 803	Arctic Ocean>Beaufort Sea	70.6328	-135.88	-218	10.1016/j.margeo.2011.11.004	10.1016/j.quascirev.2013.07.006	www.ncdc.noaa.gov/paleo/study/27910		MarineSediment							SAUG_s									256.45	4589.6	70.7	0.923116					http://lipdverse.org/wNAm/0_15_0/Station803.Bringue.2012.html
Station803.Bringue.2012	Station 803	Arctic Ocean>Beaufort Sea	70.6328	-135.88	-218	10.1016/j.margeo.2011.11.004	10.1016/j.quascirev.2013.07.006	www.ncdc.noaa.gov/paleo/study/27910		MarineSediment							SAUG/3									327.13	4540.2	70.7	0.949426					http://lipdverse.org/wNAm/0_15_0/Station803.Bringue.2012.html
Station803.Bringue.2012	Station 803	Arctic Ocean>Beaufort Sea	70.6328	-135.88	-218	10.1016/j.margeo.2011.11.004	10.1016/j.quascirev.2013.07.006	www.ncdc.noaa.gov/paleo/study/27910		MarineSediment							TETE_i									256.45	4589.6	70.7	0.923116					http://lipdverse.org/wNAm/0_15_0/Station803.Bringue.2012.html
Station803.Bringue.2012	Station 803	Arctic Ocean>Beaufort Sea	70.6328	-135.88	-218	10.1016/j.margeo.2011.11.004	10.1016/j.quascirev.2013.07.006	www.ncdc.noaa.gov/paleo/study/27910		MarineSediment							TETE									256.45	4589.6	70.7	0.923116					http://lipdverse.org/wNAm/0_15_0/Station803.Bringue.2012.html
Station803.Bringue.2012	Station 803	Arctic Ocean>Beaufort Sea	70.6328	-135.88	-218	10.1016/j.margeo.2011.11.004	10.1016/j.quascirev.2013.07.006	www.ncdc.noaa.gov/paleo/study/27910		MarineSediment							TETE_s									256.45	4589.6	70.7	0.923116					http://lipdverse.org/wNAm/0_15_0/Station803.Bringue.2012.html
Station803.Bringue.2012	Station 803	Arctic Ocean>Beaufort Sea	70.6328	-135.88	-218	10.1016/j.margeo.2011.11.004	10.1016/j.quascirev.2013.07.006	www.ncdc.noaa.gov/paleo/study/27910		MarineSediment							TETE/3									327.13	4540.2	70.7	0.949426					http://lipdverse.org/wNAm/0_15_0/Station803.Bringue.2012.html
Station803.Bringue.2012	Station 803	Arctic Ocean>Beaufort Sea	70.6328	-135.88	-218	10.1016/j.margeo.2011.11.004	10.1016/j.quascirev.2013.07.006	www.ncdc.noaa.gov/paleo/study/27910		MarineSediment							SETE_i									256.45	4589.6	70.7	0.923116					http://lipdverse.org/wNAm/0_15_0/Station803.Bringue.2012.html
Station803.Bringue.2012	Station 803	Arctic Ocean>Beaufort Sea	70.6328	-135.88	-218	10.1016/j.margeo.2011.11.004	10.1016/j.quascirev.2013.07.006	www.ncdc.noaa.gov/paleo/study/27910		MarineSediment							SETE									256.45	4589.6	70.7	0.923116					http://lipdverse.org/wNAm/0_15_0/Station803.Bringue.2012.html
Station803.Bringue.2012	Station 803	Arctic Ocean>Beaufort Sea	70.6328	-135.88	-218	10.1016/j.margeo.2011.11.004	10.1016/j.quascirev.2013.07.006	www.ncdc.noaa.gov/paleo/study/27910		MarineSediment							SETE_s									256.45	4589.6	70.7	0.923116					http://lipdverse.org/wNAm/0_15_0/Station803.Bringue.2012.html
Station803.Bringue.2012	Station 803	Arctic Ocean>Beaufort Sea	70.6328	-135.88	-218	10.1016/j.margeo.2011.11.004	10.1016/j.quascirev.2013.07.006	www.ncdc.noaa.gov/paleo/study/27910		MarineSediment							SETE/3									327.13	4540.2	70.7	0.949426					http://lipdverse.org/wNAm/0_15_0/Station803.Bringue.2012.html
Station803.Bringue.2012	Station 803	Arctic Ocean>Beaufort Sea	70.6328	-135.88	-218	10.1016/j.margeo.2011.11.004	10.1016/j.quascirev.2013.07.006	www.ncdc.noaa.gov/paleo/study/27910		MarineSediment							IMON1953_i									256.45	4589.6	70.7	0.923116					http://lipdverse.org/wNAm/0_15_0/Station803.Bringue.2012.html
Station803.Bringue.2012	Station 803	Arctic Ocean>Beaufort Sea	70.6328	-135.88	-218	10.1016/j.margeo.2011.11.004	10.1016/j.quascirev.2013.07.006	www.ncdc.noaa.gov/paleo/study/27910		MarineSediment							IMON1953_s									256.45	4589.6	70.7	0.923116					http://lipdverse.org/wNAm/0_15_0/Station803.Bringue.2012.html
Station803.Bringue.2012	Station 803	Arctic Ocean>Beaufort Sea	70.6328	-135.88	-218	10.1016/j.margeo.2011.11.004	10.1016/j.quascirev.2013.07.006	www.ncdc.noaa.gov/paleo/study/27910		MarineSediment							IMON1953/3									327.13	4540.2	70.7	0.949426					http://lipdverse.org/wNAm/0_15_0/Station803.Bringue.2012.html
Station803.Bringue.2012	Station 803	Arctic Ocean>Beaufort Sea	70.6328	-135.88	-218	10.1016/j.margeo.2011.11.004	10.1016/j.quascirev.2013.07.006	www.ncdc.noaa.gov/paleo/study/27910		MarineSediment							depth-range	cm										7.2						http://lipdverse.org/wNAm/0_15_0/Station803.Bringue.2012.html
Station803.Bringue.2012	Station 803	Arctic Ocean>Beaufort Sea	70.6328	-135.88	-218	10.1016/j.margeo.2011.11.004	10.1016/j.quascirev.2013.07.006	www.ncdc.noaa.gov/paleo/study/27910		MarineSediment							TFEV_i									-50.4	186.8	7.2	16.8634					http://lipdverse.org/wNAm/0_15_0/Station803.Bringue.2012.html
Station803.Bringue.2012	Station 803	Arctic Ocean>Beaufort Sea	70.6328	-135.88	-218	10.1016/j.margeo.2011.11.004	10.1016/j.quascirev.2013.07.006	www.ncdc.noaa.gov/paleo/study/27910		MarineSediment							TFEV									-50.4	186.8	7.2	16.8634					http://lipdverse.org/wNAm/0_15_0/Station803.Bringue.2012.html
Station803.Bringue.2012	Station 803	Arctic Ocean>Beaufort Sea	70.6328	-135.88	-218	10.1016/j.margeo.2011.11.004	10.1016/j.quascirev.2013.07.006	www.ncdc.noaa.gov/paleo/study/27910		MarineSediment							TFEV_s									-50.4	186.8	7.2	16.8634					http://lipdverse.org/wNAm/0_15_0/Station803.Bringue.2012.html
Station803.Bringue.2012	Station 803	Arctic Ocean>Beaufort Sea	70.6328	-135.88	-218	10.1016/j.margeo.2011.11.004	10.1016/j.quascirev.2013.07.006	www.ncdc.noaa.gov/paleo/study/27910		MarineSediment							TFEV/3									-43.2	179.6	7.2	17.9533					http://lipdverse.org/wNAm/0_15_0/Station803.Bringue.2012.html
Station803.Bringue.2012	Station 803	Arctic Ocean>Beaufort Sea	70.6328	-135.88	-218	10.1016/j.margeo.2011.11.004	10.1016/j.quascirev.2013.07.006	www.ncdc.noaa.gov/paleo/study/27910		MarineSediment							SFEV_i									-50.4	186.8	7.2	16.8634					http://lipdverse.org/wNAm/0_15_0/Station803.Bringue.2012.html
Station803.Bringue.2012	Station 803	Arctic Ocean>Beaufort Sea	70.6328	-135.88	-218	10.1016/j.margeo.2011.11.004	10.1016/j.quascirev.2013.07.006	www.ncdc.noaa.gov/paleo/study/27910		MarineSediment							SFEV									-50.4	186.8	7.2	16.8634					http://lipdverse.org/wNAm/0_15_0/Station803.Bringue.2012.html
Station803.Bringue.2012	Station 803	Arctic Ocean>Beaufort Sea	70.6328	-135.88	-218	10.1016/j.margeo.2011.11.004	10.1016/j.quascirev.2013.07.006	www.ncdc.noaa.gov/paleo/study/27910		MarineSediment							SFEV_s									-50.4	186.8	7.2	16.8634					http://lipdverse.org/wNAm/0_15_0/Station803.Bringue.2012.html
Station803.Bringue.2012	Station 803	Arctic Ocean>Beaufort Sea	70.6328	-135.88	-218	10.1016/j.margeo.2011.11.004	10.1016/j.quascirev.2013.07.006	www.ncdc.noaa.gov/paleo/study/27910		MarineSediment							SFEV/3									-43.2	179.6	7.2	17.9533					http://lipdverse.org/wNAm/0_15_0/Station803.Bringue.2012.html
Station803.Bringue.2012	Station 803	Arctic Ocean>Beaufort Sea	70.6328	-135.88	-218	10.1016/j.margeo.2011.11.004	10.1016/j.quascirev.2013.07.006	www.ncdc.noaa.gov/paleo/study/27910		MarineSediment							THIV_i									-50.4	186.8	7.2	16.8634					http://lipdverse.org/wNAm/0_15_0/Station803.Bringue.2012.html
Station803.Bringue.2012	Station 803	Arctic Ocean>Beaufort Sea	70.6328	-135.88	-218	10.1016/j.margeo.2011.11.004	10.1016/j.quascirev.2013.07.006	www.ncdc.noaa.gov/paleo/study/27910		MarineSediment							THIV									-50.4	186.8	7.2	16.8634					http://lipdverse.org/wNAm/0_15_0/Station803.Bringue.2012.html
Station803.Bringue.2012	Station 803	Arctic Ocean>Beaufort Sea	70.6328	-135.88	-218	10.1016/j.margeo.2011.11.004	10.1016/j.quascirev.2013.07.006	www.ncdc.noaa.gov/paleo/study/27910		MarineSediment							THIV_s									-50.4	186.8	7.2	16.8634					http://lipdverse.org/wNAm/0_15_0/Station803.Bringue.2012.html
Station803.Bringue.2012	Station 803	Arctic Ocean>Beaufort Sea	70.6328	-135.88	-218	10.1016/j.margeo.2011.11.004	10.1016/j.quascirev.2013.07.006	www.ncdc.noaa.gov/paleo/study/27910		MarineSediment							THIV/3									-43.2	179.6	7.2	17.9533					http://lipdverse.org/wNAm/0_15_0/Station803.Bringue.2012.html
Station803.Bringue.2012	Station 803	Arctic Ocean>Beaufort Sea	70.6328	-135.88	-218	10.1016/j.margeo.2011.11.004	10.1016/j.quascirev.2013.07.006	www.ncdc.noaa.gov/paleo/study/27910		MarineSediment							SHIV_i									-50.4	186.8	7.2	16.8634					http://lipdverse.org/wNAm/0_15_0/Station803.Bringue.2012.html
Station803.Bringue.2012	Station 803	Arctic Ocean>Beaufort Sea	70.6328	-135.88	-218	10.1016/j.margeo.2011.11.004	10.1016/j.quascirev.2013.07.006	www.ncdc.noaa.gov/paleo/study/27910		MarineSediment							SHIV									-50.4	186.8	7.2	16.8634					http://lipdverse.org/wNAm/0_15_0/Station803.Bringue.2012.html
Station803.Bringue.2012	Station 803	Arctic Ocean>Beaufort Sea	70.6328	-135.88	-218	10.1016/j.margeo.2011.11.004	10.1016/j.quascirev.2013.07.006	www.ncdc.noaa.gov/paleo/study/27910		MarineSediment							SHIV_s									-50.4	186.8	7.2	16.8634					http://lipdverse.org/wNAm/0_15_0/Station803.Bringue.2012.html
Station803.Bringue.2012	Station 803	Arctic Ocean>Beaufort Sea	70.6328	-135.88	-218	10.1016/j.margeo.2011.11.004	10.1016/j.quascirev.2013.07.006	www.ncdc.noaa.gov/paleo/study/27910		MarineSediment							SHIV/3									-43.2	179.6	7.2	17.9533					http://lipdverse.org/wNAm/0_15_0/Station803.Bringue.2012.html
Station803.Bringue.2012	Station 803	Arctic Ocean>Beaufort Sea	70.6328	-135.88	-218	10.1016/j.margeo.2011.11.004	10.1016/j.quascirev.2013.07.006	www.ncdc.noaa.gov/paleo/study/27910		MarineSediment							temperature			T						-50.4	186.8	7.2	16.8634					http://lipdverse.org/wNAm/0_15_0/Station803.Bringue.2012.html
Station803.Bringue.2012	Station 803	Arctic Ocean>Beaufort Sea	70.6328	-135.88	-218	10.1016/j.margeo.2011.11.004	10.1016/j.quascirev.2013.07.006	www.ncdc.noaa.gov/paleo/study/27910		MarineSediment							temperature	degC	abs	T	sea@surface		8	summer		-50.4	186.8	7.2	16.8634					http://lipdverse.org/wNAm/0_15_0/Station803.Bringue.2012.html
Station803.Bringue.2012	Station 803	Arctic Ocean>Beaufort Sea	70.6328	-135.88	-218	10.1016/j.margeo.2011.11.004	10.1016/j.quascirev.2013.07.006	www.ncdc.noaa.gov/paleo/study/27910		MarineSediment							temperature			T						-50.4	186.8	7.2	16.8634					http://lipdverse.org/wNAm/0_15_0/Station803.Bringue.2012.html
Station803.Bringue.2012	Station 803	Arctic Ocean>Beaufort Sea	70.6328	-135.88	-218	10.1016/j.margeo.2011.11.004	10.1016/j.quascirev.2013.07.006	www.ncdc.noaa.gov/paleo/study/27910		MarineSediment							temperature	degC		T						-43.2	179.6	7.2	17.9533					http://lipdverse.org/wNAm/0_15_0/Station803.Bringue.2012.html
Station803.Bringue.2012	Station 803	Arctic Ocean>Beaufort Sea	70.6328	-135.88	-218	10.1016/j.margeo.2011.11.004	10.1016/j.quascirev.2013.07.006	www.ncdc.noaa.gov/paleo/study/27910		MarineSediment							SAUG_i									-50.4	186.8	7.2	16.8634					http://lipdverse.org/wNAm/0_15_0/Station803.Bringue.2012.html
Station803.Bringue.2012	Station 803	Arctic Ocean>Beaufort Sea	70.6328	-135.88	-218	10.1016/j.margeo.2011.11.004	10.1016/j.quascirev.2013.07.006	www.ncdc.noaa.gov/paleo/study/27910		MarineSediment							SAUG									-50.4	186.8	7.2	16.8634					http://lipdverse.org/wNAm/0_15_0/Station803.Bringue.2012.html
Station803.Bringue.2012	Station 803	Arctic Ocean>Beaufort Sea	70.6328	-135.88	-218	10.1016/j.margeo.2011.11.004	10.1016/j.quascirev.2013.07.006	www.ncdc.noaa.gov/paleo/study/27910		MarineSediment							SAUG_s									-50.4	186.8	7.2	16.8634					http://lipdverse.org/wNAm/0_15_0/Station803.Bringue.2012.html
Station803.Bringue.2012	Station 803	Arctic Ocean>Beaufort Sea	70.6328	-135.88	-218	10.1016/j.margeo.2011.11.004	10.1016/j.quascirev.2013.07.006	www.ncdc.noaa.gov/paleo/study/27910		MarineSediment							SAUG/3									-43.2	179.6	7.2	17.9533					http://lipdverse.org/wNAm/0_15_0/Station803.Bringue.2012.html
Station803.Bringue.2012	Station 803	Arctic Ocean>Beaufort Sea	70.6328	-135.88	-218	10.1016/j.margeo.2011.11.004	10.1016/j.quascirev.2013.07.006	www.ncdc.noaa.gov/paleo/study/27910		MarineSediment							TETE_i									-50.4	186.8	7.2	16.8634					http://lipdverse.org/wNAm/0_15_0/Station803.Bringue.2012.html
Station803.Bringue.2012	Station 803	Arctic Ocean>Beaufort Sea	70.6328	-135.88	-218	10.1016/j.margeo.2011.11.004	10.1016/j.quascirev.2013.07.006	www.ncdc.noaa.gov/paleo/study/27910		MarineSediment							TETE									-50.4	186.8	7.2	16.8634					http://lipdverse.org/wNAm/0_15_0/Station803.Bringue.2012.html
Station803.Bringue.2012	Station 803	Arctic Ocean>Beaufort Sea	70.6328	-135.88	-218	10.1016/j.margeo.2011.11.004	10.1016/j.quascirev.2013.07.006	www.ncdc.noaa.gov/paleo/study/27910		MarineSediment							TETE_s									-50.4	186.8	7.2	16.8634					http://lipdverse.org/wNAm/0_15_0/Station803.Bringue.2012.html
Station803.Bringue.2012	Station 803	Arctic Ocean>Beaufort Sea	70.6328	-135.88	-218	10.1016/j.margeo.2011.11.004	10.1016/j.quascirev.2013.07.006	www.ncdc.noaa.gov/paleo/study/27910		MarineSediment							TETE/3									-43.2	179.6	7.2	17.9533					http://lipdverse.org/wNAm/0_15_0/Station803.Bringue.2012.html
Station803.Bringue.2012	Station 803	Arctic Ocean>Beaufort Sea	70.6328	-135.88	-218	10.1016/j.margeo.2011.11.004	10.1016/j.quascirev.2013.07.006	www.ncdc.noaa.gov/paleo/study/27910		MarineSediment							SETE_i									-50.4	186.8	7.2	16.8634					http://lipdverse.org/wNAm/0_15_0/Station803.Bringue.2012.html
Station803.Bringue.2012	Station 803	Arctic Ocean>Beaufort Sea	70.6328	-135.88	-218	10.1016/j.margeo.2011.11.004	10.1016/j.quascirev.2013.07.006	www.ncdc.noaa.gov/paleo/study/27910		MarineSediment							SETE									-50.4	186.8	7.2	16.8634					http://lipdverse.org/wNAm/0_15_0/Station803.Bringue.2012.html
Station803.Bringue.2012	Station 803	Arctic Ocean>Beaufort Sea	70.6328	-135.88	-218	10.1016/j.margeo.2011.11.004	10.1016/j.quascirev.2013.07.006	www.ncdc.noaa.gov/paleo/study/27910		MarineSediment							SETE_s									-50.4	186.8	7.2	16.8634					http://lipdverse.org/wNAm/0_15_0/Station803.Bringue.2012.html
Station803.Bringue.2012	Station 803	Arctic Ocean>Beaufort Sea	70.6328	-135.88	-218	10.1016/j.margeo.2011.11.004	10.1016/j.quascirev.2013.07.006	www.ncdc.noaa.gov/paleo/study/27910		MarineSediment							SETE/3									-43.2	179.6	7.2	17.9533					http://lipdverse.org/wNAm/0_15_0/Station803.Bringue.2012.html
Station803.Bringue.2012	Station 803	Arctic Ocean>Beaufort Sea	70.6328	-135.88	-218	10.1016/j.margeo.2011.11.004	10.1016/j.quascirev.2013.07.006	www.ncdc.noaa.gov/paleo/study/27910		MarineSediment							IMON1953_i									-50.4	186.8	7.2	16.8634					http://lipdverse.org/wNAm/0_15_0/Station803.Bringue.2012.html
Station803.Bringue.2012	Station 803	Arctic Ocean>Beaufort Sea	70.6328	-135.88	-218	10.1016/j.margeo.2011.11.004	10.1016/j.quascirev.2013.07.006	www.ncdc.noaa.gov/paleo/study/27910		MarineSediment							IMON1953									-50.4	186.8	7.2	16.8634					http://lipdverse.org/wNAm/0_15_0/Station803.Bringue.2012.html
Station803.Bringue.2012	Station 803	Arctic Ocean>Beaufort Sea	70.6328	-135.88	-218	10.1016/j.margeo.2011.11.004	10.1016/j.quascirev.2013.07.006	www.ncdc.noaa.gov/paleo/study/27910		MarineSediment							IMON1953_s									-50.4	186.8	7.2	16.8634					http://lipdverse.org/wNAm/0_15_0/Station803.Bringue.2012.html
Station803.Bringue.2012	Station 803	Arctic Ocean>Beaufort Sea	70.6328	-135.88	-218	10.1016/j.margeo.2011.11.004	10.1016/j.quascirev.2013.07.006	www.ncdc.noaa.gov/paleo/study/27910		MarineSediment							IMON1953/3									-43.2	179.6	7.2	17.9533					http://lipdverse.org/wNAm/0_15_0/Station803.Bringue.2012.html
Station803.Bringue.2012	Station 803	Arctic Ocean>Beaufort Sea	70.6328	-135.88	-218	10.1016/j.margeo.2011.11.004	10.1016/j.quascirev.2013.07.006	www.ncdc.noaa.gov/paleo/study/27910		MarineSediment							depth-range	cm										70.69						http://lipdverse.org/wNAm/0_15_0/Station803.Bringue.2012.html
Station803.Bringue.2012	Station 803	Arctic Ocean>Beaufort Sea	70.6328	-135.88	-218	10.1016/j.margeo.2011.11.004	10.1016/j.quascirev.2013.07.006	www.ncdc.noaa.gov/paleo/study/27910		MarineSediment							TFEV_i									-40.446	701.78	70.69	5.38919					http://lipdverse.org/wNAm/0_15_0/Station803.Bringue.2012.html
Station803.Bringue.2012	Station 803	Arctic Ocean>Beaufort Sea	70.6328	-135.88	-218	10.1016/j.margeo.2011.11.004	10.1016/j.quascirev.2013.07.006	www.ncdc.noaa.gov/paleo/study/27910		MarineSediment							TFEV									-40.446	701.78	70.69	5.38919					http://lipdverse.org/wNAm/0_15_0/Station803.Bringue.2012.html
Station803.Bringue.2012	Station 803	Arctic Ocean>Beaufort Sea	70.6328	-135.88	-218	10.1016/j.margeo.2011.11.004	10.1016/j.quascirev.2013.07.006	www.ncdc.noaa.gov/paleo/study/27910		MarineSediment							TFEV_s									-40.446	701.78	70.69	5.38919					http://lipdverse.org/wNAm/0_15_0/Station803.Bringue.2012.html
Station803.Bringue.2012	Station 803	Arctic Ocean>Beaufort Sea	70.6328	-135.88	-218	10.1016/j.margeo.2011.11.004	10.1016/j.quascirev.2013.07.006	www.ncdc.noaa.gov/paleo/study/27910		MarineSediment							TFEV/3									30.243	666.44	70.69	6.28736					http://lipdverse.org/wNAm/0_15_0/Station803.Bringue.2012.html
Station803.Bringue.2012	Station 803	Arctic Ocean>Beaufort Sea	70.6328	-135.88	-218	10.1016/j.margeo.2011.11.004	10.1016/j.quascirev.2013.07.006	www.ncdc.noaa.gov/paleo/study/27910		MarineSediment							SFEV_i									-40.446	701.78	70.69	5.38919					http://lipdverse.org/wNAm/0_15_0/Station803.Bringue.2012.html
Station803.Bringue.2012	Station 803	Arctic Ocean>Beaufort Sea	70.6328	-135.88	-218	10.1016/j.margeo.2011.11.004	10.1016/j.quascirev.2013.07.006	www.ncdc.noaa.gov/paleo/study/27910		MarineSediment							SFEV									-40.446	701.78	70.69	5.38919					http://lipdverse.org/wNAm/0_15_0/Station803.Bringue.2012.html
Station803.Bringue.2012	Station 803	Arctic Ocean>Beaufort Sea	70.6328	-135.88	-218	10.1016/j.margeo.2011.11.004	10.1016/j.quascirev.2013.07.006	www.ncdc.noaa.gov/paleo/study/27910		MarineSediment							SFEV_s									-40.446	701.78	70.69	5.38919					http://lipdverse.org/wNAm/0_15_0/Station803.Bringue.2012.html
Station803.Bringue.2012	Station 803	Arctic Ocean>Beaufort Sea	70.6328	-135.88	-218	10.1016/j.margeo.2011.11.004	10.1016/j.quascirev.2013.07.006	www.ncdc.noaa.gov/paleo/study/27910		MarineSediment							SFEV/3									30.243	666.44	70.69	6.28736					http://lipdverse.org/wNAm/0_15_0/Station803.Bringue.2012.html
Station803.Bringue.2012	Station 803	Arctic Ocean>Beaufort Sea	70.6328	-135.88	-218	10.1016/j.margeo.2011.11.004	10.1016/j.quascirev.2013.07.006	www.ncdc.noaa.gov/paleo/study/27910		MarineSediment							THIV_i									-40.446	701.78	70.69	5.38919					http://lipdverse.org/wNAm/0_15_0/Station803.Bringue.2012.html
Station803.Bringue.2012	Station 803	Arctic Ocean>Beaufort Sea	70.6328	-135.88	-218	10.1016/j.margeo.2011.11.004	10.1016/j.quascirev.2013.07.006	www.ncdc.noaa.gov/paleo/study/27910		MarineSediment							THIV									-40.446	701.78	70.69	5.38919					http://lipdverse.org/wNAm/0_15_0/Station803.Bringue.2012.html
Station803.Bringue.2012	Station 803	Arctic Ocean>Beaufort Sea	70.6328	-135.88	-218	10.1016/j.margeo.2011.11.004	10.1016/j.quascirev.2013.07.006	www.ncdc.noaa.gov/paleo/study/27910		MarineSediment							THIV_s									-40.446	701.78	70.69	5.38919					http://lipdverse.org/wNAm/0_15_0/Station803.Bringue.2012.html
Station803.Bringue.2012	Station 803	Arctic Ocean>Beaufort Sea	70.6328	-135.88	-218	10.1016/j.margeo.2011.11.004	10.1016/j.quascirev.2013.07.006	www.ncdc.noaa.gov/paleo/study/27910		MarineSediment							THIV/3									30.243	666.44	70.69	6.28736					http://lipdverse.org/wNAm/0_15_0/Station803.Bringue.2012.html
Station803.Bringue.2012	Station 803	Arctic Ocean>Beaufort Sea	70.6328	-135.88	-218	10.1016/j.margeo.2011.11.004	10.1016/j.quascirev.2013.07.006	www.ncdc.noaa.gov/paleo/study/27910		MarineSediment							SHIV_i									-40.446	701.78	70.69	5.38919					http://lipdverse.org/wNAm/0_15_0/Station803.Bringue.2012.html
Station803.Bringue.2012	Station 803	Arctic Ocean>Beaufort Sea	70.6328	-135.88	-218	10.1016/j.margeo.2011.11.004	10.1016/j.quascirev.2013.07.006	www.ncdc.noaa.gov/paleo/study/27910		MarineSediment							SHIV									-40.446	701.78	70.69	5.38919					http://lipdverse.org/wNAm/0_15_0/Station803.Bringue.2012.html
Station803.Bringue.2012	Station 803	Arctic Ocean>Beaufort Sea	70.6328	-135.88	-218	10.1016/j.margeo.2011.11.004	10.1016/j.quascirev.2013.07.006	www.ncdc.noaa.gov/paleo/study/27910		MarineSediment							SHIV_s									-40.446	701.78	70.69	5.38919					http://lipdverse.org/wNAm/0_15_0/Station803.Bringue.2012.html
Station803.Bringue.2012	Station 803	Arctic Ocean>Beaufort Sea	70.6328	-135.88	-218	10.1016/j.margeo.2011.11.004	10.1016/j.quascirev.2013.07.006	www.ncdc.noaa.gov/paleo/study/27910		MarineSediment							SHIV/3									30.243	666.44	70.69	6.28736					http://lipdverse.org/wNAm/0_15_0/Station803.Bringue.2012.html
Station803.Bringue.2012	Station 803	Arctic Ocean>Beaufort Sea	70.6328	-135.88	-218	10.1016/j.margeo.2011.11.004	10.1016/j.quascirev.2013.07.006	www.ncdc.noaa.gov/paleo/study/27910		MarineSediment							temperature			T						-40.446	701.78	70.69	5.38919					http://lipdverse.org/wNAm/0_15_0/Station803.Bringue.2012.html
Station803.Bringue.2012	Station 803	Arctic Ocean>Beaufort Sea	70.6328	-135.88	-218	10.1016/j.margeo.2011.11.004	10.1016/j.quascirev.2013.07.006	www.ncdc.noaa.gov/paleo/study/27910		MarineSediment							temperature	degC		T	sea@surface		august			-40.446	701.78	70.69	5.38919					http://lipdverse.org/wNAm/0_15_0/Station803.Bringue.2012.html
Station803.Bringue.2012	Station 803	Arctic Ocean>Beaufort Sea	70.6328	-135.88	-218	10.1016/j.margeo.2011.11.004	10.1016/j.quascirev.2013.07.006	www.ncdc.noaa.gov/paleo/study/27910		MarineSediment							temperature			T						-40.446	701.78	70.69	5.38919					http://lipdverse.org/wNAm/0_15_0/Station803.Bringue.2012.html
Station803.Bringue.2012	Station 803	Arctic Ocean>Beaufort Sea	70.6328	-135.88	-218	10.1016/j.margeo.2011.11.004	10.1016/j.quascirev.2013.07.006	www.ncdc.noaa.gov/paleo/study/27910		MarineSediment							temperature			T						30.243	666.44	70.69	6.28736					http://lipdverse.org/wNAm/0_15_0/Station803.Bringue.2012.html
Station803.Bringue.2012	Station 803	Arctic Ocean>Beaufort Sea	70.6328	-135.88	-218	10.1016/j.margeo.2011.11.004	10.1016/j.quascirev.2013.07.006	www.ncdc.noaa.gov/paleo/study/27910		MarineSediment							SAUG_i									-40.446	701.78	70.69	5.38919					http://lipdverse.org/wNAm/0_15_0/Station803.Bringue.2012.html
Station803.Bringue.2012	Station 803	Arctic Ocean>Beaufort Sea	70.6328	-135.88	-218	10.1016/j.margeo.2011.11.004	10.1016/j.quascirev.2013.07.006	www.ncdc.noaa.gov/paleo/study/27910		MarineSediment							SAUG									-40.446	701.78	70.69	5.38919					http://lipdverse.org/wNAm/0_15_0/Station803.Bringue.2012.html
Station803.Bringue.2012	Station 803	Arctic Ocean>Beaufort Sea	70.6328	-135.88	-218	10.1016/j.margeo.2011.11.004	10.1016/j.quascirev.2013.07.006	www.ncdc.noaa.gov/paleo/study/27910		MarineSediment							SAUG_s									-40.446	701.78	70.69	5.38919					http://lipdverse.org/wNAm/0_15_0/Station803.Bringue.2012.html
Station803.Bringue.2012	Station 803	Arctic Ocean>Beaufort Sea	70.6328	-135.88	-218	10.1016/j.margeo.2011.11.004	10.1016/j.quascirev.2013.07.006	www.ncdc.noaa.gov/paleo/study/27910		MarineSediment							SAUG/3									30.243	666.44	70.69	6.28736					http://lipdverse.org/wNAm/0_15_0/Station803.Bringue.2012.html
Station803.Bringue.2012	Station 803	Arctic Ocean>Beaufort Sea	70.6328	-135.88	-218	10.1016/j.margeo.2011.11.004	10.1016/j.quascirev.2013.07.006	www.ncdc.noaa.gov/paleo/study/27910		MarineSediment							TETE_i									-40.446	701.78	70.69	5.38919					http://lipdverse.org/wNAm/0_15_0/Station803.Bringue.2012.html
Station803.Bringue.2012	Station 803	Arctic Ocean>Beaufort Sea	70.6328	-135.88	-218	10.1016/j.margeo.2011.11.004	10.1016/j.quascirev.2013.07.006	www.ncdc.noaa.gov/paleo/study/27910		MarineSediment							TETE									-40.446	701.78	70.69	5.38919					http://lipdverse.org/wNAm/0_15_0/Station803.Bringue.2012.html
Station803.Bringue.2012	Station 803	Arctic Ocean>Beaufort Sea	70.6328	-135.88	-218	10.1016/j.margeo.2011.11.004	10.1016/j.quascirev.2013.07.006	www.ncdc.noaa.gov/paleo/study/27910		MarineSediment							TETE_s									-40.446	701.78	70.69	5.38919					http://lipdverse.org/wNAm/0_15_0/Station803.Bringue.2012.html
Station803.Bringue.2012	Station 803	Arctic Ocean>Beaufort Sea	70.6328	-135.88	-218	10.1016/j.margeo.2011.11.004	10.1016/j.quascirev.2013.07.006	www.ncdc.noaa.gov/paleo/study/27910		MarineSediment							TETE/3									30.243	666.44	70.69	6.28736					http://lipdverse.org/wNAm/0_15_0/Station803.Bringue.2012.html
Station803.Bringue.2012	Station 803	Arctic Ocean>Beaufort Sea	70.6328	-135.88	-218	10.1016/j.margeo.2011.11.004	10.1016/j.quascirev.2013.07.006	www.ncdc.noaa.gov/paleo/study/27910		MarineSediment							SETE_i									-40.446	701.78	70.69	5.38919					http://lipdverse.org/wNAm/0_15_0/Station803.Bringue.2012.html
Station803.Bringue.2012	Station 803	Arctic Ocean>Beaufort Sea	70.6328	-135.88	-218	10.1016/j.margeo.2011.11.004	10.1016/j.quascirev.2013.07.006	www.ncdc.noaa.gov/paleo/study/27910		MarineSediment							SETE									-40.446	701.78	70.69	5.38919					http://lipdverse.org/wNAm/0_15_0/Station803.Bringue.2012.html
Station803.Bringue.2012	Station 803	Arctic Ocean>Beaufort Sea	70.6328	-135.88	-218	10.1016/j.margeo.2011.11.004	10.1016/j.quascirev.2013.07.006	www.ncdc.noaa.gov/paleo/study/27910		MarineSediment							SETE_s									-40.446	701.78	70.69	5.38919					http://lipdverse.org/wNAm/0_15_0/Station803.Bringue.2012.html
Station803.Bringue.2012	Station 803	Arctic Ocean>Beaufort Sea	70.6328	-135.88	-218	10.1016/j.margeo.2011.11.004	10.1016/j.quascirev.2013.07.006	www.ncdc.noaa.gov/paleo/study/27910		MarineSediment							SETE/3									30.243	666.44	70.69	6.28736					http://lipdverse.org/wNAm/0_15_0/Station803.Bringue.2012.html
Station803.Bringue.2012	Station 803	Arctic Ocean>Beaufort Sea	70.6328	-135.88	-218	10.1016/j.margeo.2011.11.004	10.1016/j.quascirev.2013.07.006	www.ncdc.noaa.gov/paleo/study/27910		MarineSediment							IMON1953_i									-40.446	701.78	70.69	5.38919					http://lipdverse.org/wNAm/0_15_0/Station803.Bringue.2012.html
Station803.Bringue.2012	Station 803	Arctic Ocean>Beaufort Sea	70.6328	-135.88	-218	10.1016/j.margeo.2011.11.004	10.1016/j.quascirev.2013.07.006	www.ncdc.noaa.gov/paleo/study/27910		MarineSediment							IMON1953									-40.446	701.78	70.69	5.38919					http://lipdverse.org/wNAm/0_15_0/Station803.Bringue.2012.html
Station803.Bringue.2012	Station 803	Arctic Ocean>Beaufort Sea	70.6328	-135.88	-218	10.1016/j.margeo.2011.11.004	10.1016/j.quascirev.2013.07.006	www.ncdc.noaa.gov/paleo/study/27910		MarineSediment							IMON1953_s									-40.446	701.78	70.69	5.38919					http://lipdverse.org/wNAm/0_15_0/Station803.Bringue.2012.html
Station803.Bringue.2012	Station 803	Arctic Ocean>Beaufort Sea	70.6328	-135.88	-218	10.1016/j.margeo.2011.11.004	10.1016/j.quascirev.2013.07.006	www.ncdc.noaa.gov/paleo/study/27910		MarineSediment							IMON1953/3									30.243	666.44	70.69	6.28736					http://lipdverse.org/wNAm/0_15_0/Station803.Bringue.2012.html
StellaLake.Reinemann.2009	Stella Lake	North America>United States Of America>Nevada	39.005	-114.32	3170	10.1016/j.yqres.2009.06.003		www.ncdc.noaa.gov/paleo/study/27330		LakeSediment	chironomid						OriginalSampleID											74.368						http://lipdverse.org/wNAm/0_15_0/StellaLake.Reinemann.2009.html
StellaLake.Reinemann.2009	Stella Lake	North America>United States Of America>Nevada	39.005	-114.32	3170	10.1016/j.yqres.2009.06.003		www.ncdc.noaa.gov/paleo/study/27330		LakeSediment	chironomid						uncertainty									0	6678.09	74.368	0.598974					http://lipdverse.org/wNAm/0_15_0/StellaLake.Reinemann.2009.html
StellaLake.Reinemann.2009	Stella Lake	North America>United States Of America>Nevada	39.005	-114.32	3170	10.1016/j.yqres.2009.06.003		www.ncdc.noaa.gov/paleo/study/27330		LakeSediment	chironomid						uncertainty									0	6678.09	74.368	0.598974					http://lipdverse.org/wNAm/0_15_0/StellaLake.Reinemann.2009.html
StellaLake.Reinemann.2009	Stella Lake	North America>United States Of America>Nevada	39.005	-114.32	3170	10.1016/j.yqres.2009.06.003		www.ncdc.noaa.gov/paleo/study/27330		LakeSediment	chironomid						reliable											74.368						http://lipdverse.org/wNAm/0_15_0/StellaLake.Reinemann.2009.html
StewartBog.Jimenez-Moreno.2008	Stewart Bog	North America>United States Of America>New Mexico	35.8323	-105.722	3116	10.1016/j.quascirev.2008.04.004		wNAm	15356, 15355	Peat							Picea	percent								31	14325.5	64.9	0.919041					http://lipdverse.org/wNAm/0_15_0/StewartBog.Jimenez-Moreno.2008.html
StewartBog.Jimenez-Moreno.2008	Stewart Bog	North America>United States Of America>New Mexico	35.8323	-105.722	3116	10.1016/j.quascirev.2008.04.004		wNAm	15356, 15355	Peat							PinusTotal	percent								31	14325.5	64.9	0.919041					http://lipdverse.org/wNAm/0_15_0/StewartBog.Jimenez-Moreno.2008.html
StewartBog.Jimenez-Moreno.2008	Stewart Bog	North America>United States Of America>New Mexico	35.8323	-105.722	3116	10.1016/j.quascirev.2008.04.004		wNAm	15356, 15355	Peat							Artemisia	percent								31	14325.5	64.9	0.919041					http://lipdverse.org/wNAm/0_15_0/StewartBog.Jimenez-Moreno.2008.html
SwanLake.Schmieder.2011	Swan Lake	North America>United States Of America>Nebraska	42.16	-99.03	702	10.1016/j.quascirev.2011.04.011		wNAm		LakeSediment							depth.top	mm								46	8429.3	51.4875	0.596424					http://lipdverse.org/wNAm/0_15_0/SwanLake.Schmieder.2011.html
SwanLake.Schmieder.2011	Swan Lake	North America>United States Of America>Nebraska	42.16	-99.03	702	10.1016/j.quascirev.2011.04.011		wNAm		LakeSediment							Z_score	standardized								46	8429.3	51.4875	0.596424					http://lipdverse.org/wNAm/0_15_0/SwanLake.Schmieder.2011.html
SwanLake.Schmieder.2011	Swan Lake	North America>United States Of America>Nebraska	42.16	-99.03	702	10.1016/j.quascirev.2011.04.011		wNAm		LakeSediment							mineral_flux	gomcm2yr-1								139.4	8429.3	51.485	0.603144					http://lipdverse.org/wNAm/0_15_0/SwanLake.Schmieder.2011.html
SwanLake.Schmieder.2011	Swan Lake	North America>United States Of America>Nebraska	42.16	-99.03	702	10.1016/j.quascirev.2011.04.011		wNAm		LakeSediment	mineral					; paleoData_proxy changed - was originally mineral_flux	thickness	cm2yr-1		M	eff		annual	annual	positive	139.4	8429.3	51.485	0.603144					http://lipdverse.org/wNAm/0_15_0/SwanLake.Schmieder.2011.html
SwanLake.Schmieder.2011	Swan Lake	North America>United States Of America>Nebraska	42.16	-99.03	702	10.1016/j.quascirev.2011.04.011		wNAm		LakeSediment							CCA1	mm								46	8429.3	51.4875	0.596424					http://lipdverse.org/wNAm/0_15_0/SwanLake.Schmieder.2011.html
SwanLake.Schmieder.2011	Swan Lake	North America>United States Of America>Nebraska	42.16	-99.03	702	10.1016/j.quascirev.2011.04.011		wNAm		LakeSediment							Z_score	standardized								46	8429.3	51.4875	0.596424					http://lipdverse.org/wNAm/0_15_0/SwanLake.Schmieder.2011.html
Takahula.Clegg.2010	Takahula	North America>United States Of America>Alaska	67.35	-153.667	275	10.1016/j.quascirev.2009.12.009		www.ncdc.noaa.gov/paleo/study/8663		LakeSediment							depth.top	mm								-50.5	8132	59	1.09991					http://lipdverse.org/wNAm/0_15_0/Takahula.Clegg.2010.html
Takahula.Clegg.2010	Takahula	North America>United States Of America>Alaska	67.35	-153.667	275	10.1016/j.quascirev.2009.12.009		www.ncdc.noaa.gov/paleo/study/8663		LakeSediment							thickness	mm								-50.5	8132	59	1.09991					http://lipdverse.org/wNAm/0_15_0/Takahula.Clegg.2010.html
TiagoLake.Jimenez-Moreno.2011	Tiago Lake	North America>United States Of America>Colorado	40.5803	-106.613	2700	10.1130/B30240.1		wNAm		LakeSediment							Picea	percent								36	14299	44	0.919425					http://lipdverse.org/wNAm/0_15_0/TiagoLake.Jimenez-Moreno.2011.html
TiagoLake.Jimenez-Moreno.2011	Tiago Lake	North America>United States Of America>Colorado	40.5803	-106.613	2700	10.1130/B30240.1		wNAm		LakeSediment							PinusTotal	percent								36	14299	44	0.919425					http://lipdverse.org/wNAm/0_15_0/TiagoLake.Jimenez-Moreno.2011.html
TiagoLake.Jimenez-Moreno.2011	Tiago Lake	North America>United States Of America>Colorado	40.5803	-106.613	2700	10.1130/B30240.1		wNAm		LakeSediment							Artemisia	percent								36	14299	44	0.919425					http://lipdverse.org/wNAm/0_15_0/TiagoLake.Jimenez-Moreno.2011.html
TN062-0550.Barron.2018	TN062-0550	Pacific Ocean>North Pacific Ocean	40.8656	-124.573	-569	10.1016/j.quaint.2016.10.039		www.ncdc.noaa.gov/paleo/study/27330	not in Neotoma	MarineSediment							depthRange	cm										68.03						http://lipdverse.org/wNAm/0_15_0/TN062-0550.Barron.2018.html
TN062-0550.Barron.2018	TN062-0550	Pacific Ocean>North Pacific Ocean	40.8656	-124.573	-569	10.1016/j.quaint.2016.10.039		www.ncdc.noaa.gov/paleo/study/27330	not in Neotoma	MarineSediment							Calibrated											68.03						http://lipdverse.org/wNAm/0_15_0/TN062-0550.Barron.2018.html
TN062-0550.Barron.2018	TN062-0550	Pacific Ocean>North Pacific Ocean	40.8656	-124.573	-569	10.1016/j.quaint.2016.10.039		www.ncdc.noaa.gov/paleo/study/27330	not in Neotoma	MarineSediment							depthRange	cm								221.64	7333.1	68.82	1.68742					http://lipdverse.org/wNAm/0_15_0/TN062-0550.Barron.2018.html
TN062-0550.Barron.2018	TN062-0550	Pacific Ocean>North Pacific Ocean	40.8656	-124.573	-569	10.1016/j.quaint.2016.10.039		www.ncdc.noaa.gov/paleo/study/27330	not in Neotoma	MarineSediment							Calibrated											68.82						http://lipdverse.org/wNAm/0_15_0/TN062-0550.Barron.2018.html
TN062-0550.Barron.2018	TN062-0550	Pacific Ocean>North Pacific Ocean	40.8656	-124.573	-569	10.1016/j.quaint.2016.10.039		www.ncdc.noaa.gov/paleo/study/27330	not in Neotoma	MarineSediment							Fragilariopsis	percent								221.64	7333.1	68.82	1.68742					http://lipdverse.org/wNAm/0_15_0/TN062-0550.Barron.2018.html
TN062-0550.Barron.2018	TN062-0550	Pacific Ocean>North Pacific Ocean	40.8656	-124.573	-569	10.1016/j.quaint.2016.10.039		www.ncdc.noaa.gov/paleo/study/27330	not in Neotoma	MarineSediment							depthRange	cm								220	6300	140	1.97368					http://lipdverse.org/wNAm/0_15_0/TN062-0550.Barron.2018.html
TN062-0550.Barron.2018	TN062-0550	Pacific Ocean>North Pacific Ocean	40.8656	-124.573	-569	10.1016/j.quaint.2016.10.039		www.ncdc.noaa.gov/paleo/study/27330	not in Neotoma	MarineSediment							Calibrated											140						http://lipdverse.org/wNAm/0_15_0/TN062-0550.Barron.2018.html
TN062-0550.Barron.2018	TN062-0550	Pacific Ocean>North Pacific Ocean	40.8656	-124.573	-569	10.1016/j.quaint.2016.10.039		www.ncdc.noaa.gov/paleo/study/27330	not in Neotoma	MarineSediment	diatom						Dc_stapedia_aspinosa	percent		upwelling			Summer		negative	220	6300	140	1.97368					http://lipdverse.org/wNAm/0_15_0/TN062-0550.Barron.2018.html
Trout.Irvine.2012	Trout Lake	North America>Canada>Yukon Territory	68.828	-138.75	150	10.1007/s10933-012-9612-7	10.5194/cp-10-1605-2014	www.ncdc.noaa.gov/paleo/study/15444		LakeSediment							temperature	degC		T	air@surface		7			1783.99	15424.5	243.525	0.587313					http://lipdverse.org/wNAm/0_15_0/Trout.Irvine.2012.html
Trout.Irvine.2012	Trout Lake	North America>Canada>Yukon Territory	68.828	-138.75	150	10.1007/s10933-012-9612-7	10.5194/cp-10-1605-2014	www.ncdc.noaa.gov/paleo/study/15444		LakeSediment							temperature	degC		T	air@surface		7			63	9883.85	265.215	0.610945					http://lipdverse.org/wNAm/0_15_0/Trout.Irvine.2012.html
UpperBigCreek.Shuman.2015	Upper Big Creek Lake	North America>United States Of America>Colorado	40.91	-106.62	2750	10.1016/j.yqres.2015.07.004		wNAm		LakeSediment	stratigraphy					Elevation below modern, upper bound	lakeLevelHi	cm			eff		annual	annual	negative	50	12650	50	0.585774				2Ka REJECT - record staturated (overflowing) in last 2 ka	http://lipdverse.org/wNAm/0_15_0/UpperBigCreek.Shuman.2015.html
UpperBigCreek.Shuman.2015	Upper Big Creek Lake	North America>United States Of America>Colorado	40.91	-106.62	2750	10.1016/j.yqres.2015.07.004		wNAm		LakeSediment	stratigraphy					Elevation below modern, lower bound	lakeLevelLo	cm			eff		annual	annual	negative	50	12650	50	0.585774				2Ka REJECT - record staturated (overflowing) in last 2 ka	http://lipdverse.org/wNAm/0_15_0/UpperBigCreek.Shuman.2015.html
UpperFly.Bunbury.2009	Upper Fly	North America>Canada>Yukon Territory	61.07	-138.09	1326	10.1016/j.quascirev.2008.10.007	10.5194/cp-10-1605-2014	www.ncdc.noaa.gov/paleo/study/15444	10.21233/1AGN-VG81	LakeSediment	pollen						temperature	SD units		T	LST+air		Summer			144.915	9656.26	250.299	0.735963					http://lipdverse.org/wNAm/0_15_0/UpperFly.Bunbury.2009.html
UpperFly.Bunbury.2009	Upper Fly	North America>Canada>Yukon Territory	61.07	-138.09	1326	10.1016/j.quascirev.2008.10.007	10.5194/cp-10-1605-2014	www.ncdc.noaa.gov/paleo/study/15444	10.21233/1AGN-VG81	LakeSediment	pollen						temperature	degC		T	lake@surface		Summer			0	13328.8	186.9	0.583333					http://lipdverse.org/wNAm/0_15_0/UpperFly.Bunbury.2009.html
UpperPintoFen.Yu.2003	Upper Pinto Fen	North America>Canada>Alberta	53.5833	-118.017	1310	10.1191/0959683603hl667ft		www.ncdc.noaa.gov/paleo/study/13665		Peat							accumulation	g/m2/yr								-50	8017	19.8	0					http://lipdverse.org/globalHolocene/current_version/UpperPintoFen.Yu.2003.html
W8709-13PC.Lopez.2018	W8709-13PC	Pacific Ocean>North Pacific Ocean	42.117	-125.75	-2712	10.1029/2018PA003352		www.ncdc.noaa.gov/paleo/study/24150		MarineSediment							productivity	unitless								6276	26444	191	0.349406					http://lipdverse.org/wNAm/0_15_0/W8709-13PC.Lopez.2018.html
WA01.Rainville.2013	WA01	North America>Canada>Yukon Territory	61.2447	-136.926	1000	10.1139/cjes-2012-0103		www.ncdc.noaa.gov/paleo/study/18435		LakeSediment							calibrated	unitless										44.414						http://lipdverse.org/wNAm/0_15_0/WA01.Rainville.2013.html
WA01.Rainville.2013	WA01	North America>Canada>Yukon Territory	61.2447	-136.926	1000	10.1139/cjes-2012-0103		www.ncdc.noaa.gov/paleo/study/18435		LakeSediment							carbonate	percent								-57.925	12906.3	44.414	0.580531					http://lipdverse.org/wNAm/0_15_0/WA01.Rainville.2013.html
WA01.Rainville.2013	WA01	North America>Canada>Yukon Territory	61.2447	-136.926	1000	10.1139/cjes-2012-0103		www.ncdc.noaa.gov/paleo/study/18435		LakeSediment							Avg_MS	m								233.066	12906.3	45.958	0.594887					http://lipdverse.org/wNAm/0_15_0/WA01.Rainville.2013.html
WA01.Rainville.2013	WA01	North America>Canada>Yukon Territory	61.2447	-136.926	1000	10.1139/cjes-2012-0103		www.ncdc.noaa.gov/paleo/study/18435		LakeSediment							AVG_MS_DRS1_2A_3_2B_4	m								233.066	12906.3	45.958	0.594887					http://lipdverse.org/wNAm/0_15_0/WA01.Rainville.2013.html
Waskey.Levy.2004	Waskey Lake	North America>United States Of America>Alaska	59.8794	-159.207	150	10.1191/0959683604hl675rp	10.5194/cp-10-1605-2014	www.ncdc.noaa.gov/paleo/study/15444		LakeSediment							bulk density	g/cc		T	air@surface		Summer			71.15	10978.7	61.15	0.641755					http://lipdverse.org/wNAm/0_15_0/Waskey.Levy.2004.html
Windy.Chase.2008	Windy Lake	North America>Canada>British Columbia	49.8133	-117.877	1814	10.1016/j.palaeo.2007.10.020	10.1890/12-1742.1	www.ncdc.noaa.gov/paleo/study/27330		LakeSediment							sampleID											171.5						http://lipdverse.org/wNAm/0_15_0/Windy.Chase.2008.html
Windy.Chase.2008	Windy Lake	North America>Canada>British Columbia	49.8133	-117.877	1814	10.1016/j.palaeo.2007.10.020	10.1890/12-1742.1	www.ncdc.noaa.gov/paleo/study/27330		LakeSediment	chironomid						Mean consensus	degC								507	13048	171.5	0.609066					http://lipdverse.org/wNAm/0_15_0/Windy.Chase.2008.html
Windy.Chase.2008	Windy Lake	North America>Canada>British Columbia	49.8133	-117.877	1814	10.1016/j.palaeo.2007.10.020	10.1890/12-1742.1	www.ncdc.noaa.gov/paleo/study/27330		LakeSediment	chironomid						WAINV	degC								507	13048	171.5	0.609066					http://lipdverse.org/wNAm/0_15_0/Windy.Chase.2008.html
Windy.Chase.2008	Windy Lake	North America>Canada>British Columbia	49.8133	-117.877	1814	10.1016/j.palaeo.2007.10.020	10.1890/12-1742.1	www.ncdc.noaa.gov/paleo/study/27330		LakeSediment	chironomid						WAINV_total	degC								507	13048	171.5	0.609066					http://lipdverse.org/wNAm/0_15_0/Windy.Chase.2008.html
Windy.Chase.2008	Windy Lake	North America>Canada>British Columbia	49.8133	-117.877	1814	10.1016/j.palaeo.2007.10.020	10.1890/12-1742.1	www.ncdc.noaa.gov/paleo/study/27330		LakeSediment	chironomid						WACLS	degC								507	13048	171.5	0.609066					http://lipdverse.org/wNAm/0_15_0/Windy.Chase.2008.html
Windy.Chase.2008	Windy Lake	North America>Canada>British Columbia	49.8133	-117.877	1814	10.1016/j.palaeo.2007.10.020	10.1890/12-1742.1	www.ncdc.noaa.gov/paleo/study/27330		LakeSediment	chironomid						WACLS_total	degC								507	13048	171.5	0.609066					http://lipdverse.org/wNAm/0_15_0/Windy.Chase.2008.html
Windy.Chase.2008	Windy Lake	North America>Canada>British Columbia	49.8133	-117.877	1814	10.1016/j.palaeo.2007.10.020	10.1890/12-1742.1	www.ncdc.noaa.gov/paleo/study/27330		LakeSediment	chironomid						WAPLS-2	degC								507	13048	171.5	0.609066					http://lipdverse.org/wNAm/0_15_0/Windy.Chase.2008.html
Windy.Chase.2008	Windy Lake	North America>Canada>British Columbia	49.8133	-117.877	1814	10.1016/j.palaeo.2007.10.020	10.1890/12-1742.1	www.ncdc.noaa.gov/paleo/study/27330		LakeSediment	chironomid						PLS-1	degC								507	13048	171.5	0.609066					http://lipdverse.org/wNAm/0_15_0/Windy.Chase.2008.html
Windy.Chase.2008	Windy Lake	North America>Canada>British Columbia	49.8133	-117.877	1814	10.1016/j.palaeo.2007.10.020	10.1890/12-1742.1	www.ncdc.noaa.gov/paleo/study/27330		LakeSediment	chironomid						PLS-2	degC								507	13048	171.5	0.609066					http://lipdverse.org/wNAm/0_15_0/Windy.Chase.2008.html
117_723A.Godad.2011	117_723A	Indian Ocean>Arabian Sea	18.0518	57.609	-806	10.1016/j.marmicro.2010.09.006	10.1016/S0031-0182(03)00629-1			MarineSediment		planktic foraminifera calcite					planktic.d18O	permil								950	19130	490	0.995475					http://lipdverse.org/HoloceneAbruptChange/0_9_0/117_723A.Godad.2011.html
117_723A.Godad.2011	117_723A	Indian Ocean>Arabian Sea	18.0518	57.609	-806	10.1016/j.marmicro.2010.09.006	10.1016/S0031-0182(03)00629-1			MarineSediment	foraminifera	assemblage	other microfossil			Calculated based on 10.1029/2004PA001078	temperature	degC	abs	T	sea@surface		5	summerOnly	positive	500	22260	325	0.956522			PMS	there is also an August SST	http://lipdverse.org/HoloceneAbruptChange/0_9_0/117_723A.Godad.2011.html
117_723A.Godad.2011	117_723A	Indian Ocean>Arabian Sea	18.0518	57.609	-806	10.1016/j.marmicro.2010.09.006	10.1016/S0031-0182(03)00629-1			MarineSediment	foraminifera	planktic foraminifera assemblage				ANN	temperature	degC		T				summerOnly		500	22260	325	0.956522					http://lipdverse.org/HoloceneAbruptChange/0_9_0/117_723A.Godad.2011.html
161_976.Martrat.2014	161_976	Atlantic Ocean>North Atlantic Ocean>Mediterranean Sea	36.2054	-4.3127	-1108	10.1016/j.quascirev.2014.06.016	10.1002/2014PA002710			MarineSediment	alkenone	UK37	alkenone	calculated after Mueller et al. (1998)			temperature	degC	abs	T	sea@surface		annual	annual	positive	185	149480	53	0.507829			PMS, OC	fails age control (one 4400 year gap), but otherwise solid age model- keep; missing origional UK37 data (no Bayesian recalibration)	http://lipdverse.org/HoloceneAbruptChange/0_9_0/161_976.Martrat.2014.html
161_976.Martrat.2014	161_976	Atlantic Ocean>North Atlantic Ocean>Mediterranean Sea	36.2054	-4.3127	-1108	10.1016/j.quascirev.2014.06.016	10.1002/2014PA002710			MarineSediment		bulk sediment					C37.concentration	g								185	149480	53	0.507829					http://lipdverse.org/HoloceneAbruptChange/0_9_0/161_976.Martrat.2014.html
161_976.Martrat.2014	161_976	Atlantic Ocean>North Atlantic Ocean>Mediterranean Sea	36.2054	-4.3127	-1108	10.1016/j.quascirev.2014.06.016	10.1002/2014PA002710			MarineSediment							label											80						http://lipdverse.org/HoloceneAbruptChange/0_9_0/161_976.Martrat.2014.html
161_976.Martrat.2014	161_976	Atlantic Ocean>North Atlantic Ocean>Mediterranean Sea	36.2054	-4.3127	-1108	10.1016/j.quascirev.2014.06.016	10.1002/2014PA002710			MarineSediment		planktic foraminifera calcite					planktic.d18O	permil								150	146260	80	0.506329					http://lipdverse.org/HoloceneAbruptChange/0_9_0/161_976.Martrat.2014.html
161_976.Martrat.2014	161_976	Atlantic Ocean>North Atlantic Ocean>Mediterranean Sea	36.2054	-4.3127	-1108	10.1016/j.quascirev.2014.06.016	10.1002/2014PA002710			MarineSediment		planktic foraminifera calcite				cleaning protocol followed Boyle (1983) and Boyle and Keigwin (1985), implementing modifications developed in Barker et al. (2003) and Pena et al. (2005)	planktic.MgCa	mmol_mol								230	146260	80	0.509771					http://lipdverse.org/HoloceneAbruptChange/0_9_0/161_976.Martrat.2014.html
161_976.Martrat.2014	161_976	Atlantic Ocean>North Atlantic Ocean>Mediterranean Sea	36.2054	-4.3127	-1108	10.1016/j.quascirev.2014.06.016	10.1002/2014PA002710			MarineSediment	Mg/Ca	bulloides	Mg/Ca	calculated after Elderfield and Ganssen (2000) used reductive cleaning			temperature	degC	abs	T	sea@surface		annual	annual	positive	230	146260	80	0.509771			PMS	defer to BAY recalibrated	http://lipdverse.org/HoloceneAbruptChange/0_9_0/161_976.Martrat.2014.html
161_976.Martrat.2014	161_976	Atlantic Ocean>North Atlantic Ocean>Mediterranean Sea	36.2054	-4.3127	-1108	10.1016/j.quascirev.2014.06.016	10.1002/2014PA002710			MarineSediment	Mg/Ca	bulloides	Mg/Ca	SST calculated from Mg/Ca (TSid=Rl3oDldpRFu) using the BAYMAG program baymag_predict. Parameters: omega=3.1789, clean=1, species=bulloides, pstd=10, varargin=unspecified; For salinity and pH, values are specified to change through time, and are calculated using the get_phsal program from Jess Tierney, based on modern values of salinity (36.5024) and pH (8.0873) for the archive location and using …			temperature	degC	abs	T	sea@surface		annual	annual	positive	230	146260	80	0.509771			PMS	fails age control (one 4400 year gap), but otherwise solid age model- keep	http://lipdverse.org/HoloceneAbruptChange/0_9_0/161_976.Martrat.2014.html
165_1002C.Herbert.2000	165_1002C	Atlantic Ocean>North Atlantic Ocean>Caribbean Sea	10.7061	-65.1694	-892.6	10.2973/odp.proc.sr.165.030.2000	10.2973/odp.proc.sr.165.017.2000			MarineSediment							label											450						http://lipdverse.org/HoloceneAbruptChange/0_9_0/165_1002C.Herbert.2000.html
165_1002C.Herbert.2000	165_1002C	Atlantic Ocean>North Atlantic Ocean>Caribbean Sea	10.7061	-65.1694	-892.6	10.2973/odp.proc.sr.165.030.2000	10.2973/odp.proc.sr.165.017.2000			MarineSediment		bulk sediment					Uk37									690	164970	450	0.884173					http://lipdverse.org/HoloceneAbruptChange/0_9_0/165_1002C.Herbert.2000.html
165_1002C.Herbert.2000	165_1002C	Atlantic Ocean>North Atlantic Ocean>Caribbean Sea	10.7061	-65.1694	-892.6	10.2973/odp.proc.sr.165.030.2000	10.2973/odp.proc.sr.165.017.2000			MarineSediment	alkenone	UK37	alkenone				temperature	degC	abs	T	sea@surface		annual	annual	positive	690	164970	450	0.884173			DSK, PMS, AdV	defer to BAY recalibrated	http://lipdverse.org/HoloceneAbruptChange/0_9_0/165_1002C.Herbert.2000.html
[truncated: 4,896 more rows]
